# Supplementary material for: A genome-wide association study of mass spectrometry proteomics using the Seer Proteograph platform
Source: PubMed Central journal article supplement (PMC11160678; doi:10.1101/2024.05.27.596028), 2024-06-01
Supplement: media-1.pdf [file media-1.pdf]

**VTN : NP4  
P04004**

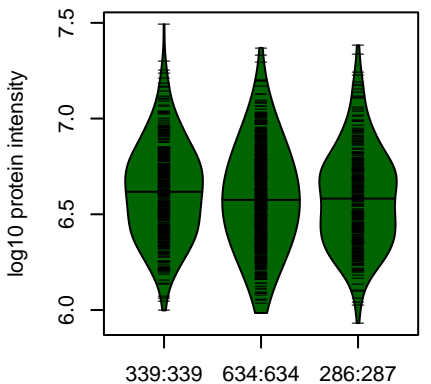

17:26694861:G:A\_G  
p = 0.13, beta = -0.0608, N = 1259

**DVWGIEGPIDAAFTR pc3  
P04004**

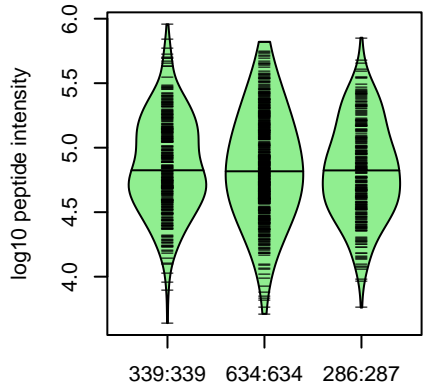

17:26694861:G:A\_G  
p = 0.14, beta = -0.0583, N = 1259

**DWHGVPGQVDAAMAGR pc2  
P04004**

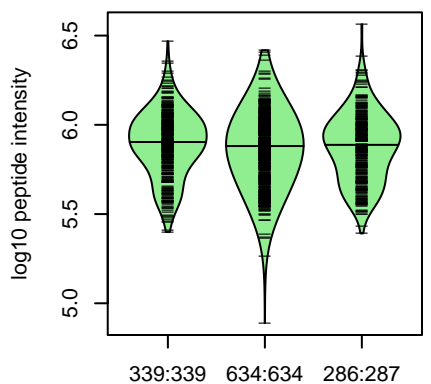

17:26694861:G:A\_G  
p = 0.27, beta = -0.0438, N = 1259

**NIISDGFDPDNDVAALALPAHSYSGR  
P04004**

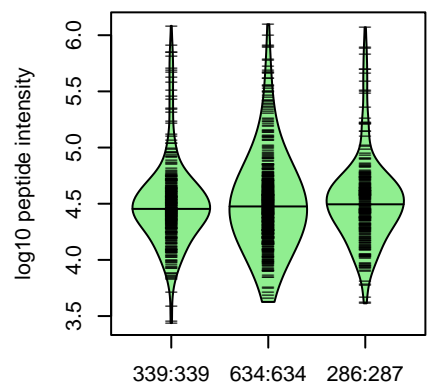

17:26694861:G:A\_G  
p = 0.92, beta = 0.00388, N = 1259

**RVDTVDPPYPR pc3  
P04004**

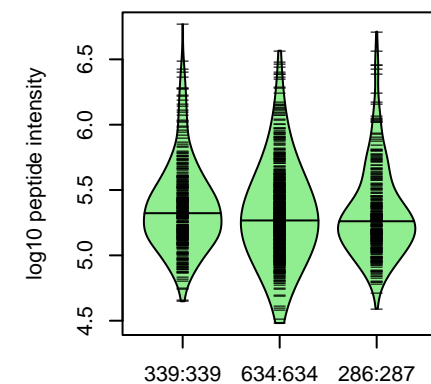

17:26694861:G:A\_G  
p = 0.034, beta = -0.0846, N = 1259

**VTN : NP4  
P04004**

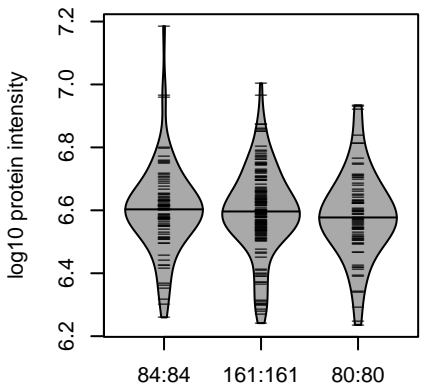

17:26694861:G:A\_G  
p = 0.3, beta = -0.0792, N = 325

**CTEGFNVDK pc2  
P04004**

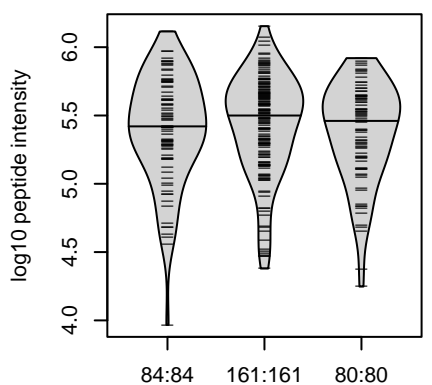

17:26694861:G:A\_G  
p = 0.45, beta = -0.0581, N = 325

**CTEGFNVDK pc2  
P04004**

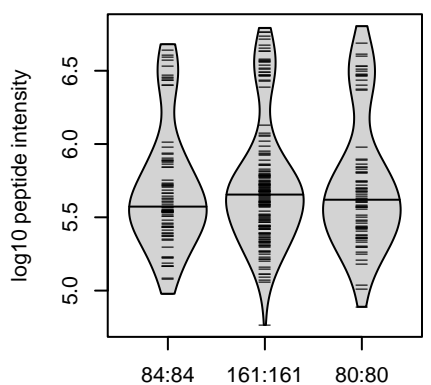

17:26694861:G:A\_G  
p = 0.8, beta = 0.0196, N = 325

**DVWGIEGPIDAAFTR pc3  
P04004**

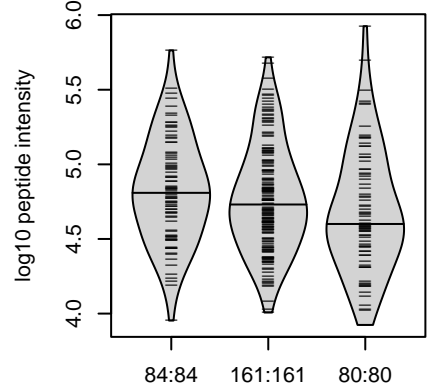

17:26694861:G:A\_G  
p = 0.013, beta = -0.192, N = 325

**DWHGVPGQVDAAMAGR pc2  
P04004**

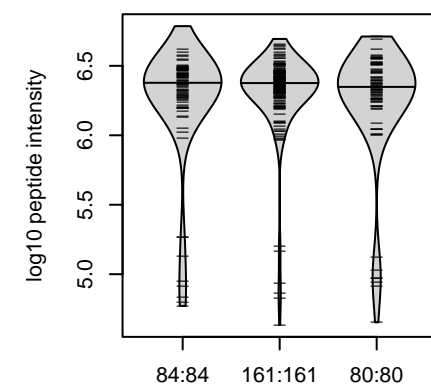

17:26694861:G:A\_G  
p = 0.61, beta = -0.0395, N = 325

**ATWLSLFSSEESNLGANNYYDYR pc  
rs704 REF**

Assay Target: VTN  
Olink UniProt: P04004  
deCODE rsID: rs704  
Proxy rsID: rs704  
deCODE: 17:28367840:G:A  
Proxy SNP: 17:26694861:G:A  
deCODE log10(p): 8468.4  
deCODE BETA: -1.28  
-----\*

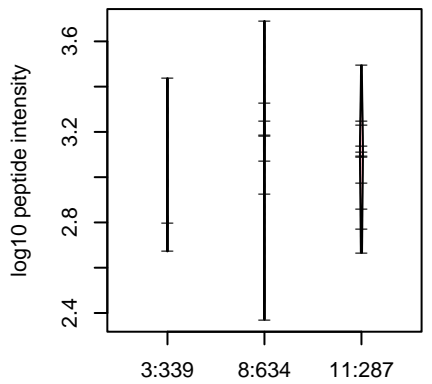

17:26694861:G:A\_G  
p = 0.0076, model = DOM, N = 22

**COL6A1 : NP1  
P12109**

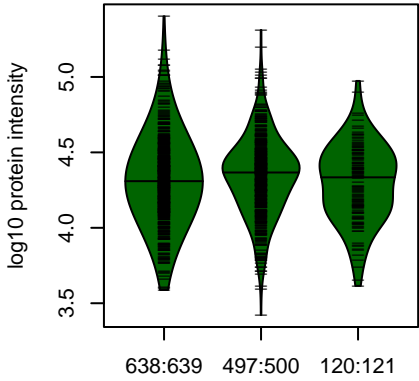

21:47423389:G:A\_A  
p = 0.76, beta = 0.0128, N = 1255

**GLEQLLVGGSHLK pc3  
P12109**

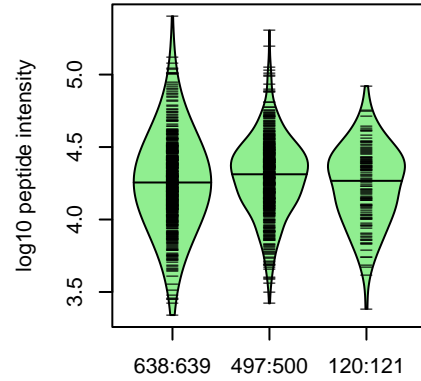

21:47423389:G:A\_A  
p = 0.51, beta = 0.0283, N = 1255

**ENYAELEDAFLK pc2  
P12109**

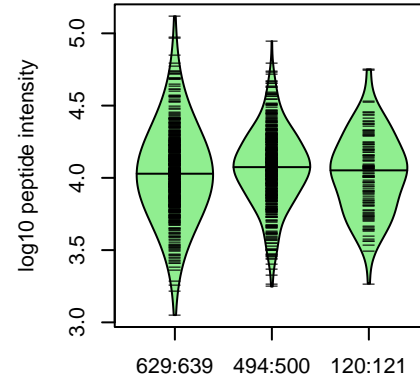

21:47423389:G:A\_A  
p = 0.32, beta = 0.0428, N = 1243

**IALVITDGR pc2  
P12109**

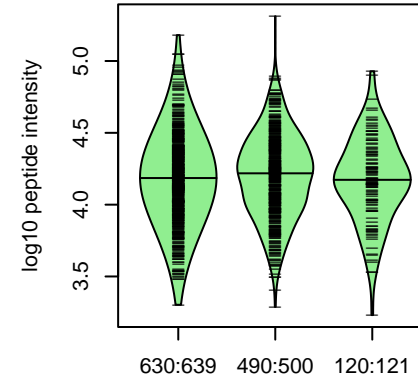

21:47423389:G:A\_A  
p = 0.96, beta = -0.00234, N = 1240

**VAVVQYSGTGQQRPER pc3  
P12109**

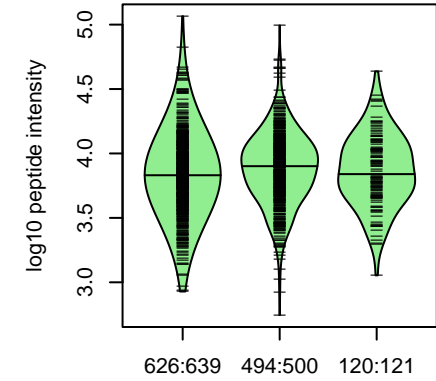

21:47423389:G:A\_A  
p = 0.039, beta = 0.0885, N = 1240

**COL6A1 : NP1  
P12109**

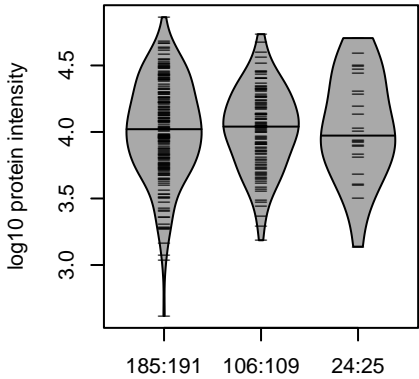

21:47423389:G:A\_A  
p = 0.81, beta = 0.0213, N = 315

**GLEQLLVGGSHLK pc3  
P12109**

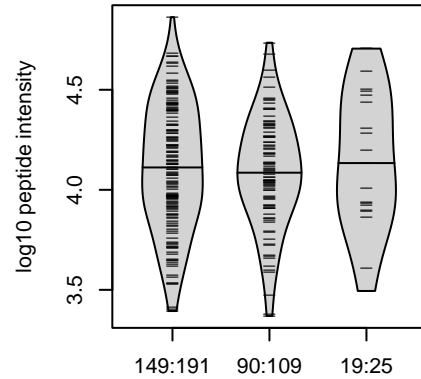

21:47423389:G:A\_A  
p = 0.9, beta = -0.0123, N = 258

**ENYAELEDAFLK pc2  
P12109**

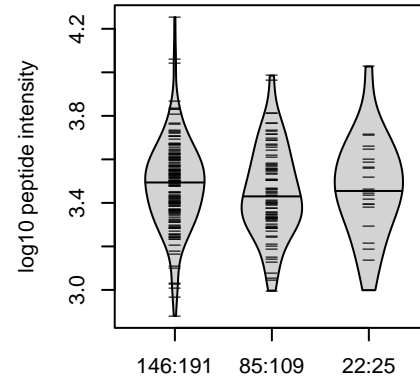

21:47423389:G:A\_A  
p = 0.37, beta = -0.0845, N = 253

**IALVITDGR pc2  
P12109**

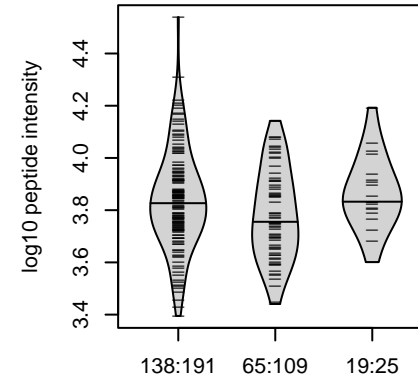

21:47423389:G:A\_A  
p = 0.67, beta = -0.0431, N = 222

**VFSVAITPDHLEPR pc3  
P12109**

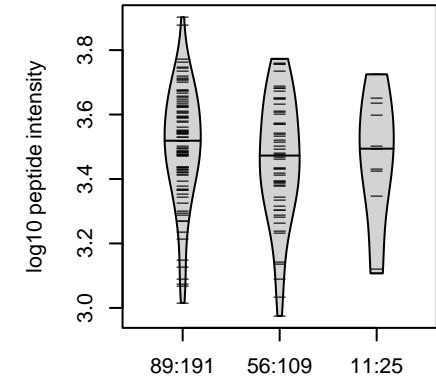

21:47423389:G:A\_A  
p = 0.26, beta = -0.141, N = 156

Assay Target: COL6A1  
Olink UniProt: P12109  
deCODE rsID: rs1053312  
Proxy rsID: rs1053312  
deCODE: 21:46003475:A:G  
Proxy SNP: 21:47423389:G:A  
deCODE log10(p): 7739.5  
deCODE BETA: -1.23  
-----  
1255:1251:1243:1240:1240:124

**INHBC : NP2  
P55103**

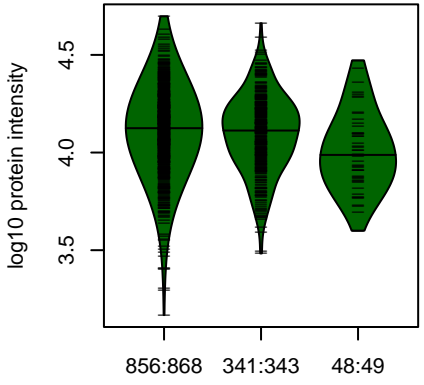

12:57839173:G:T\_T  
p = 0.00015, beta = -0.193, N = 1245

**ELLLDLAK pc2  
P55103**

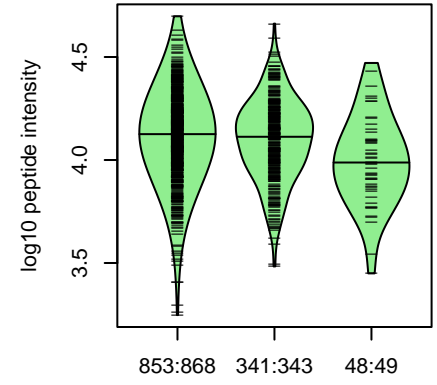

12:57839173:G:T\_T  
p = 7.8e-05, beta = -0.201, N = 1242

**GIDCQGGSR pc2  
P55103**

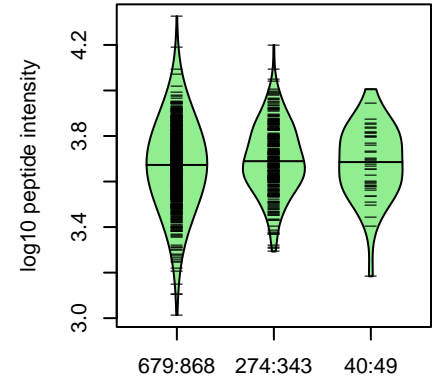

12:57839173:G:T\_T  
p = 0.13, beta = 0.0855, N = 993

**LDFHFSSDR pc2  
P55103**

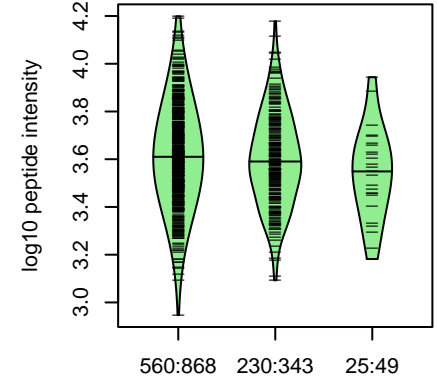

12:57839173:G:T\_T  
p = 0.02, beta = -0.151, N = 815

**QEFFVDFR pc2  
P55103**

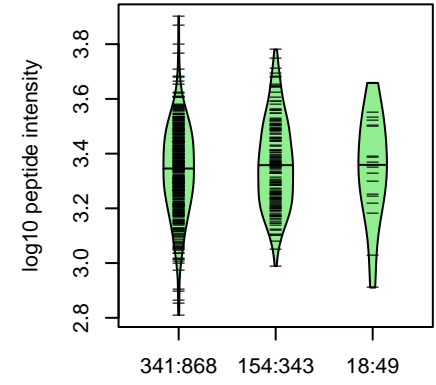

12:57839173:G:T\_T  
p = 0.19, beta = 0.103, N = 513

**INHBC : NP2  
P55103**

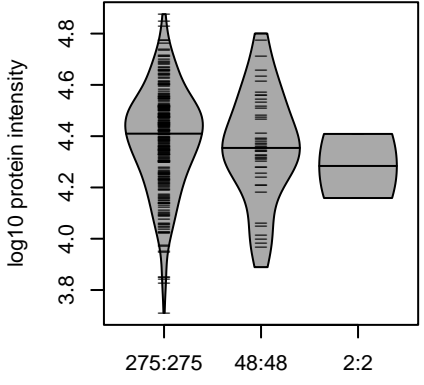

12:57839173:G:T\_T  
p = 0.41, beta = -0.118, N = 325

**ELLLDLAK pc2  
P55103**

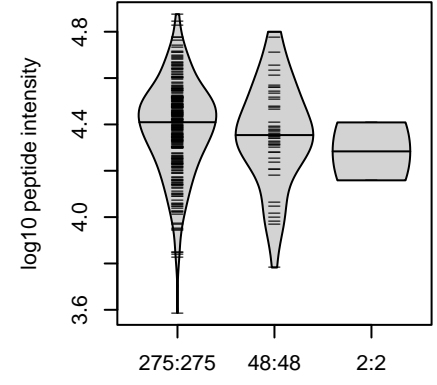

12:57839173:G:T\_T  
p = 0.44, beta = -0.111, N = 325

**GIDCQGGSR pc2  
P55103**

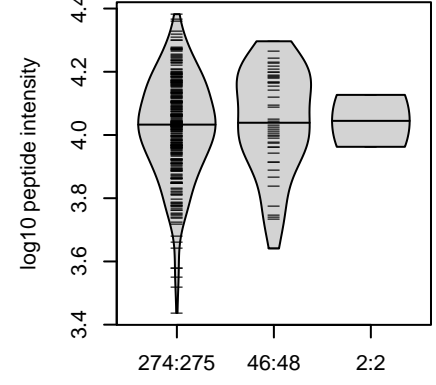

12:57839173:G:T\_T  
p = 0.31, beta = 0.148, N = 322

**LDFHFSSDR pc2  
P55103**

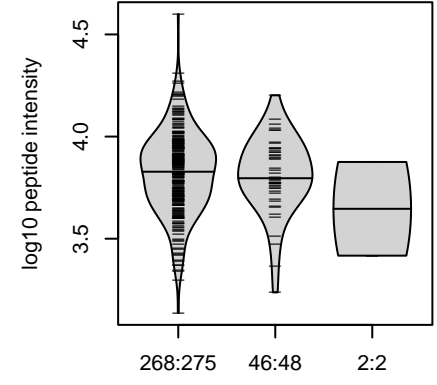

12:57839173:G:T\_T  
p = 0.37, beta = -0.131, N = 316

**AGGQCPACGGPTLELESQR pc3  
P55103**

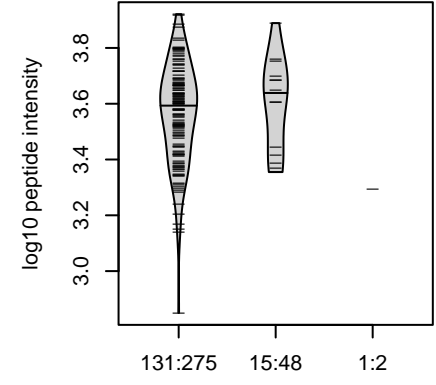

12:57839173:G:T\_T  
p = 0.7, beta = 0.0924, N = 147

Assay Target: INHBC  
Olink UniProt: P55103  
deCODE rsID: rs61352607  
Proxy rsID: rs61352607  
deCODE: 12:57445381:GAAAA  
Proxy SNP: 12:57839173:G:T  
deCODE log10(p): 7136.9  
deCODE BETA: -1.25  
\*:-:-:-:-  
1242:993:815:513:260

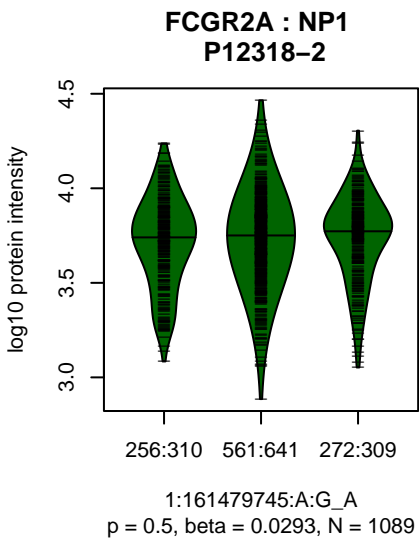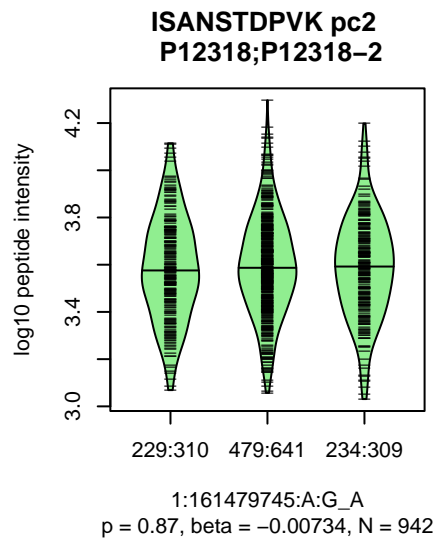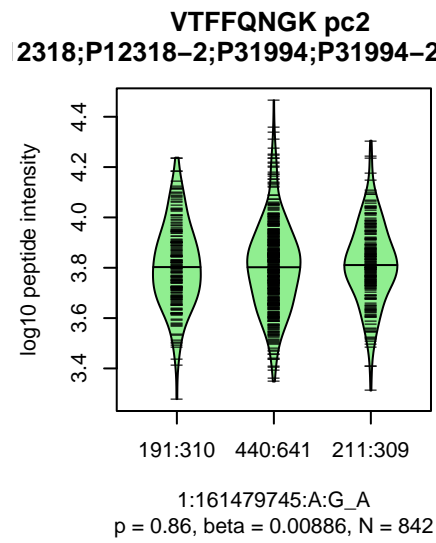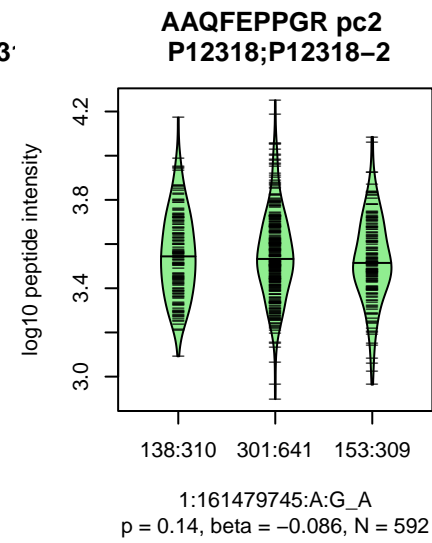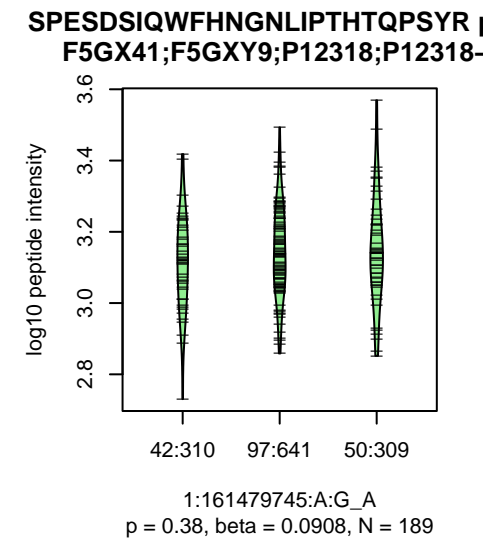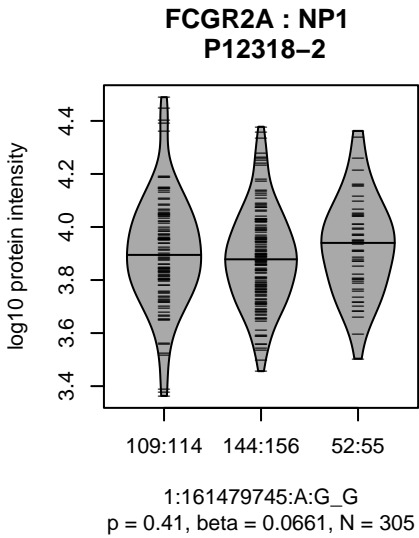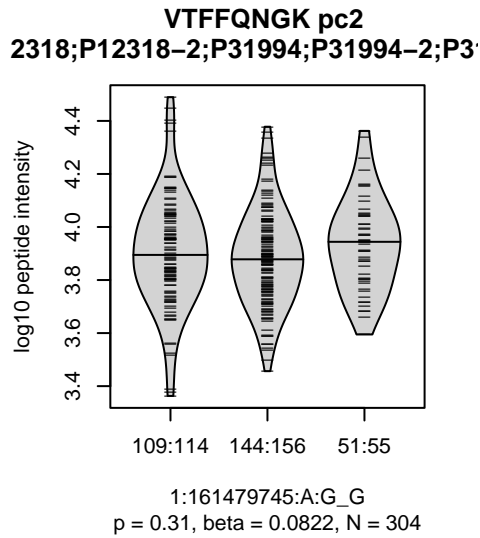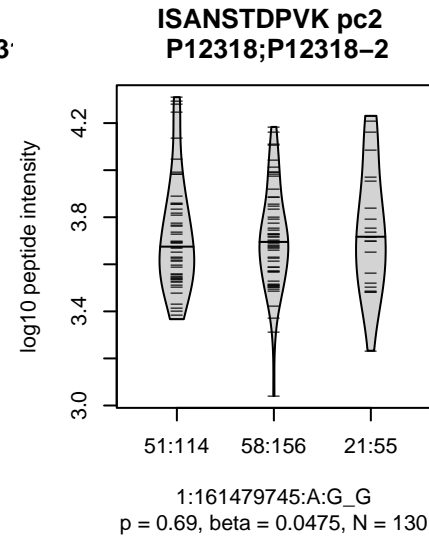

**LEPPWINVLQEDSVTLTCQGAR pc2  
rs9427398 REF**

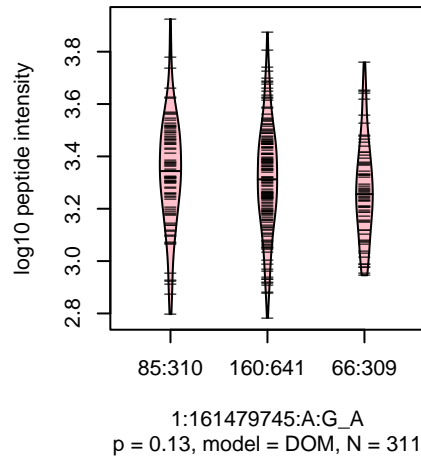

Assay Target: FCGR2A  
 Olink UniProt: P12318  
 deCODE rsID: rs1801274  
 Proxy rsID: rs1801274  
 deCODE: 1:161509955:A:G  
 Proxy SNP: 1:161479745:A:G  
 deCODE log10(p): 6757.6  
 deCODE BETA: -1.24  
 -: -: -: NA  
 942:842:592:189:12

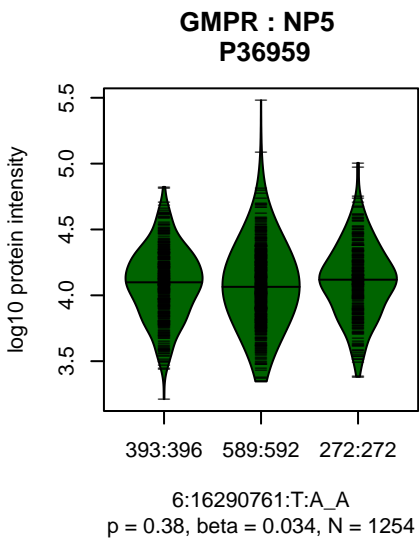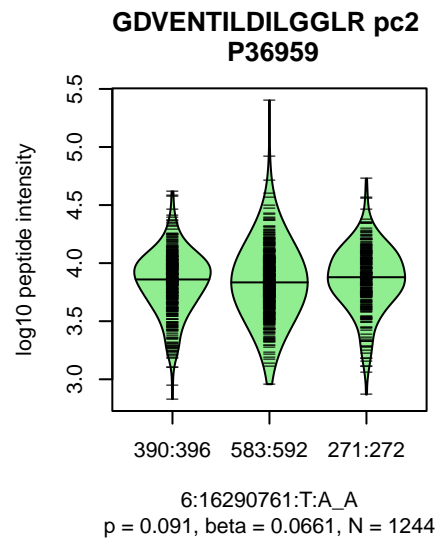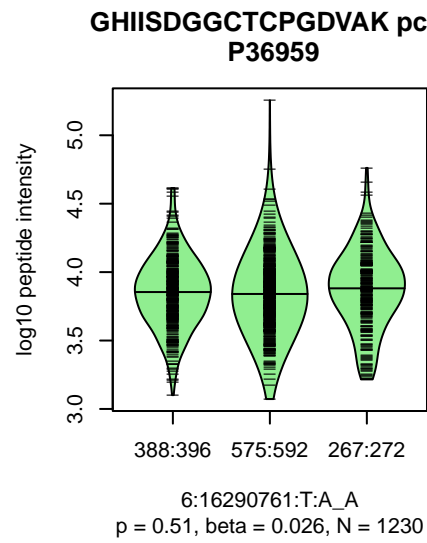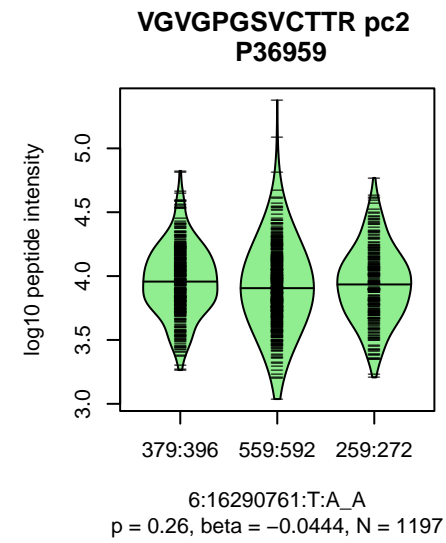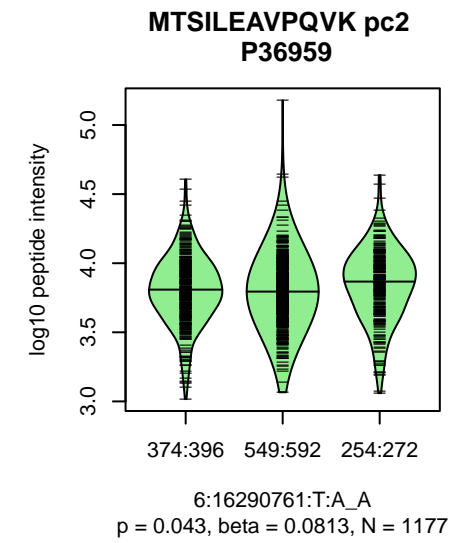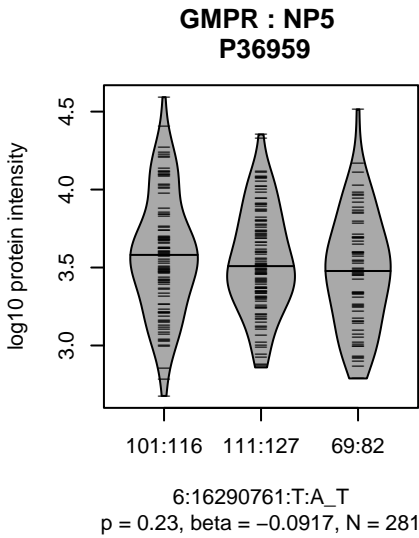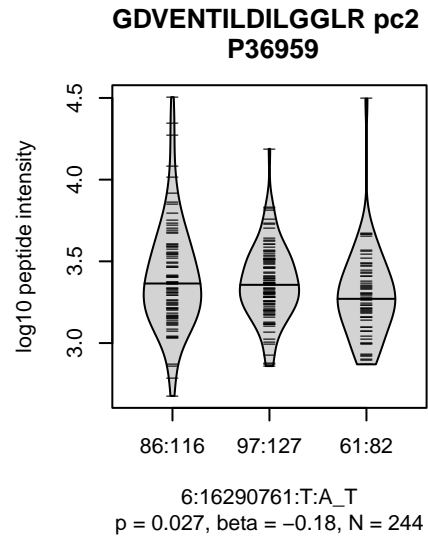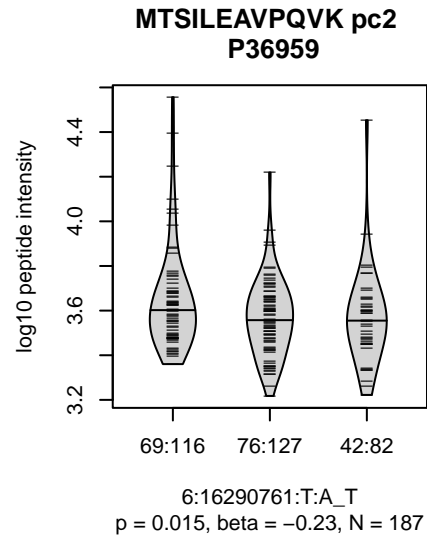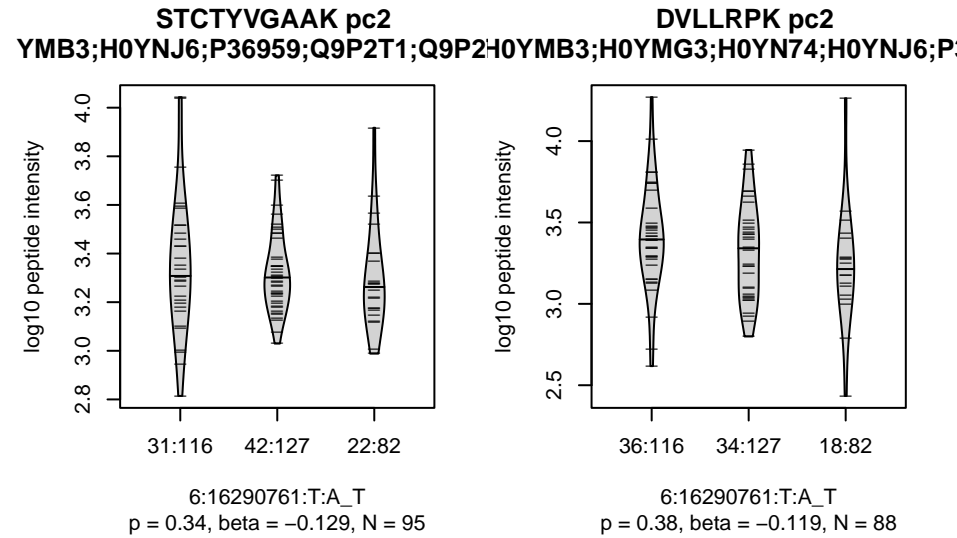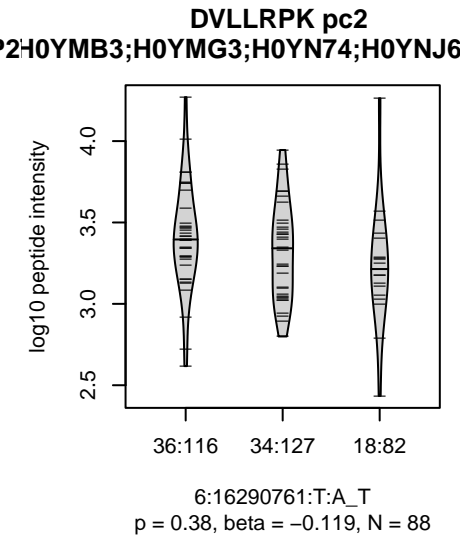

Assay Target: GMPR  
 Olink UniProt: P36959  
 deCODE rsID: rs71535075  
 Proxy rsID: rs1042391  
 deCODE: 6:16289677:GTC:G  
 Proxy SNP: 6:16290761:T:A  
 deCODE log10(p): 6478  
 deCODE BETA: 1.16  
 -----NA  
 1244:1230:1197:1177:1174:109

**ACP1 : NP3  
P24666**

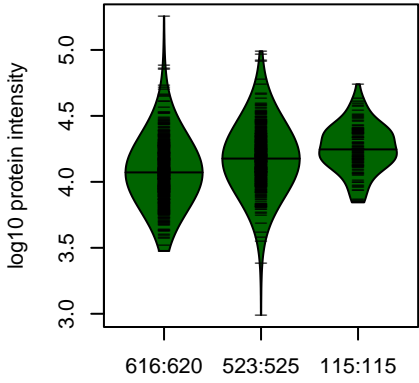

2:277003:A:G\_G  
p = 1e-26, beta = 0.452, N = 1254

**IELLSYDPQK pc2  
P24666;P24666-2**

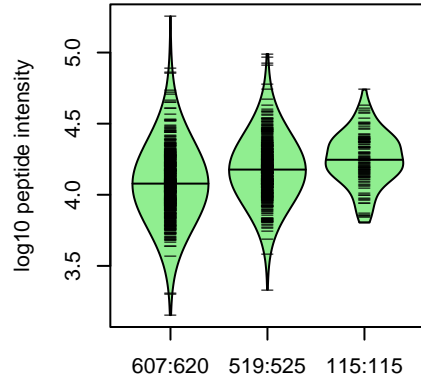

2:277003:A:G\_G  
p = 6.4e-26, beta = 0.447, N = 1241

**SVLFVCLGNICR pc2  
I2;F2Z2Q9;G5E9R5;P24666;P24666-2**

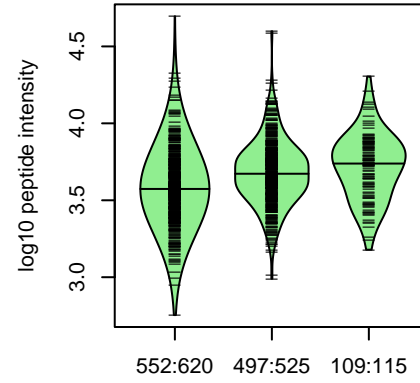

2:277003:A:G\_G  
p = 2.8e-16, beta = 0.362, N = 1158

**LVTDQNIENWR pc2  
F2Z2Q9;G5E9R5;P24666;P24666-I2;F2Z2Q9;G5E9R5;P24666;P24666-2**

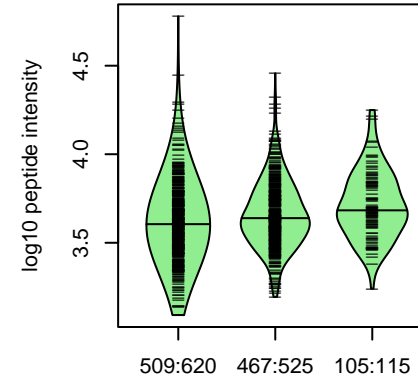

2:277003:A:G\_G  
p = 1.5e-08, beta = 0.26, N = 1081

**SPIAEAVFR pc2**

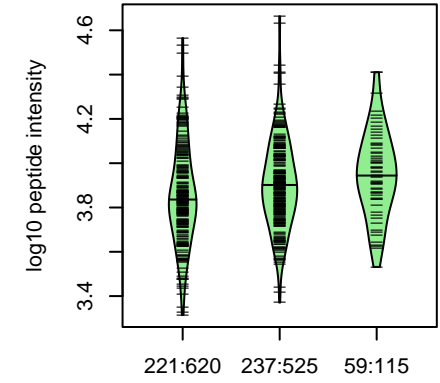

2:277003:A:G\_G  
p = 8e-05, beta = 0.256, N = 517

**ACP1 : NP3  
P24666**

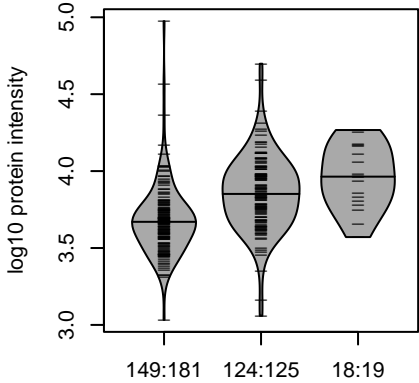

2:277003:A:G\_G  
p = 1.3e-13, beta = 0.671, N = 291

**IELLSYDPQK pc2  
P24666;P24666-2**

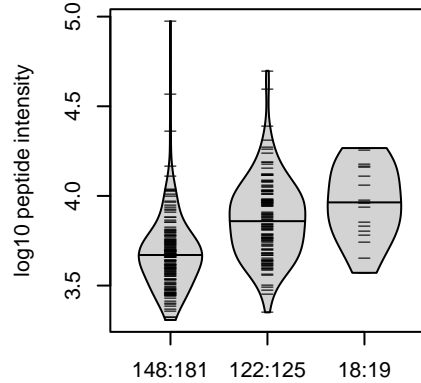

2:277003:A:G\_G  
p = 3.7e-15, beta = 0.711, N = 288

**LVTDQNIENWR pc2  
F2Z2Q9;G5E9R5;P24666;P24666-I2;F2Z2Q9;G5E9R5;P24666;P24666-2I2;F2Z2Q9;G5E9R5;P24666;P24666-2**

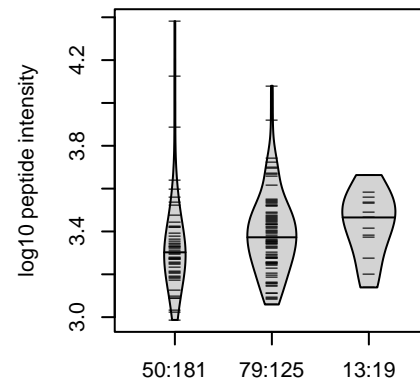

2:277003:A:G\_G  
p = 0.042, beta = 0.27, N = 142

**SVLFVCLGNICR pc2**

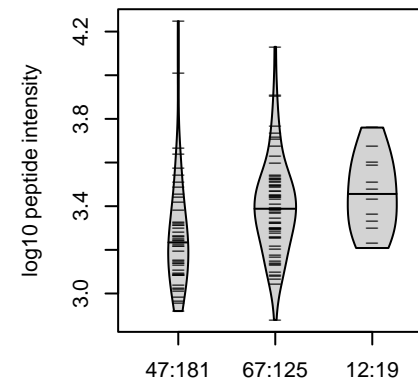

2:277003:A:G\_G  
p = 0.0048, beta = 0.386, N = 126

**SPIAEAVFR pc2**

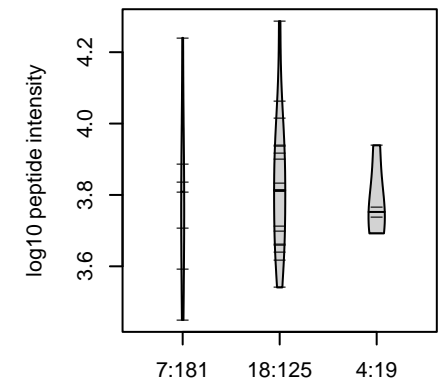

2:277003:A:G\_G  
p = 0.33, beta = -0.278, N = 29

Assay Target: ACP1  
Olink UniProt: P24666  
deCODE rsID: rs79716074  
Proxy rsID: rs79716074  
deCODE: 2:277003:G:A  
Proxy SNP: 2:277003:A:G  
deCODE log10(p): 5886.7  
deCODE BETA: 1.09  
\*:\*:\*:\*:-:-:-:NA:NA:NA  
1241:1158:1081:517:226:165:1



**EBI3 : NP4  
Q14213**

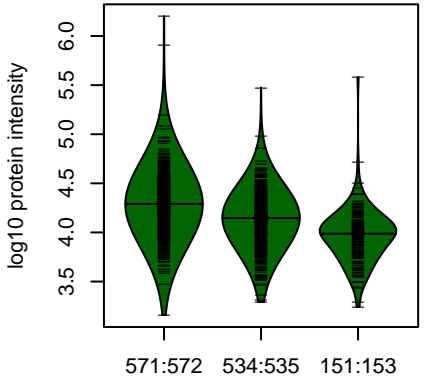

19:4242505:T:C\_C  
 $p = 7.3e-40$ ,  $\beta = -0.527$ ,  $N = 1256$

**VGPIEATSFILR pc2  
Q14213**

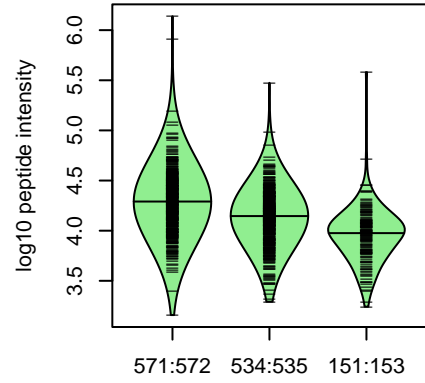

19:4242505:T:C\_C  
 $p = 6e-40$ ,  $\beta = -0.528$ ,  $N = 1256$

**GPPAALTLPK pc2  
Q14213**

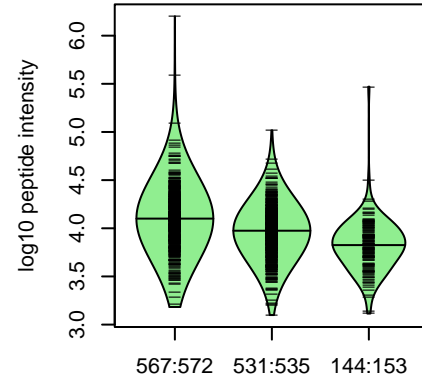

19:4242505:T:C\_C  
 $p = 3e-27$ ,  $\beta = -0.442$ ,  $N = 1242$

**EBI3 : NP4  
Q14213**

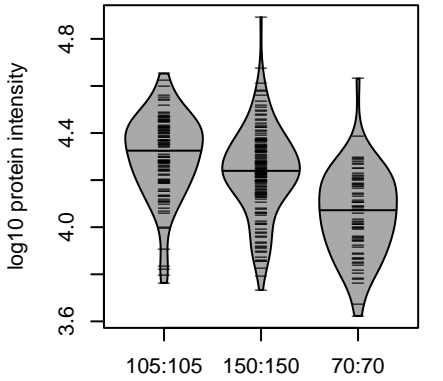

19:4242505:T:C\_C  
 $p = 3e-15$ ,  $\beta = -0.569$ ,  $N = 325$

**VGPIEATSFILR pc2  
Q14213**

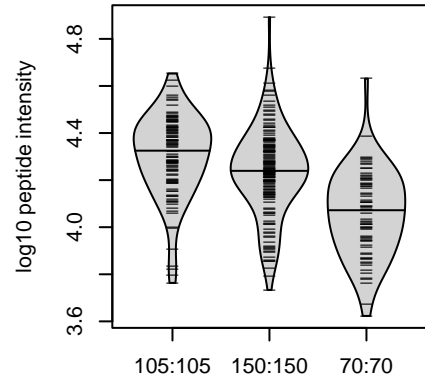

19:4242505:T:C\_C  
 $p = 3.1e-15$ ,  $\beta = -0.568$ ,  $N = 325$

**GPPAALTLPK pc2  
Q14213**

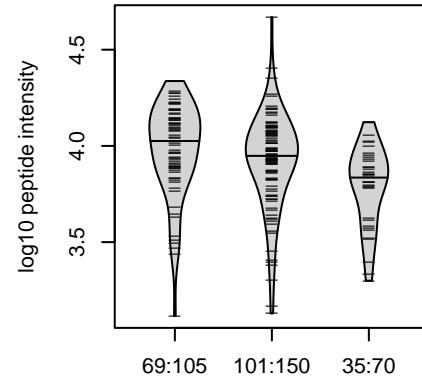

19:4242505:T:C\_C  
 $p = 6.3e-05$ ,  $\beta = -0.389$ ,  $N = 205$

Assay Target: EBI3  
Olink UniProt: Q14213  
deCODE rsID: rs353696  
Proxy rsID: rs353696  
deCODE: 19:4242508:C:T  
Proxy SNP: 19:4242505:T:C  
deCODE  $\log_{10}(p)$ : 4454.4  
deCODE BETA: -1.12  
\*\*  
1256:1242





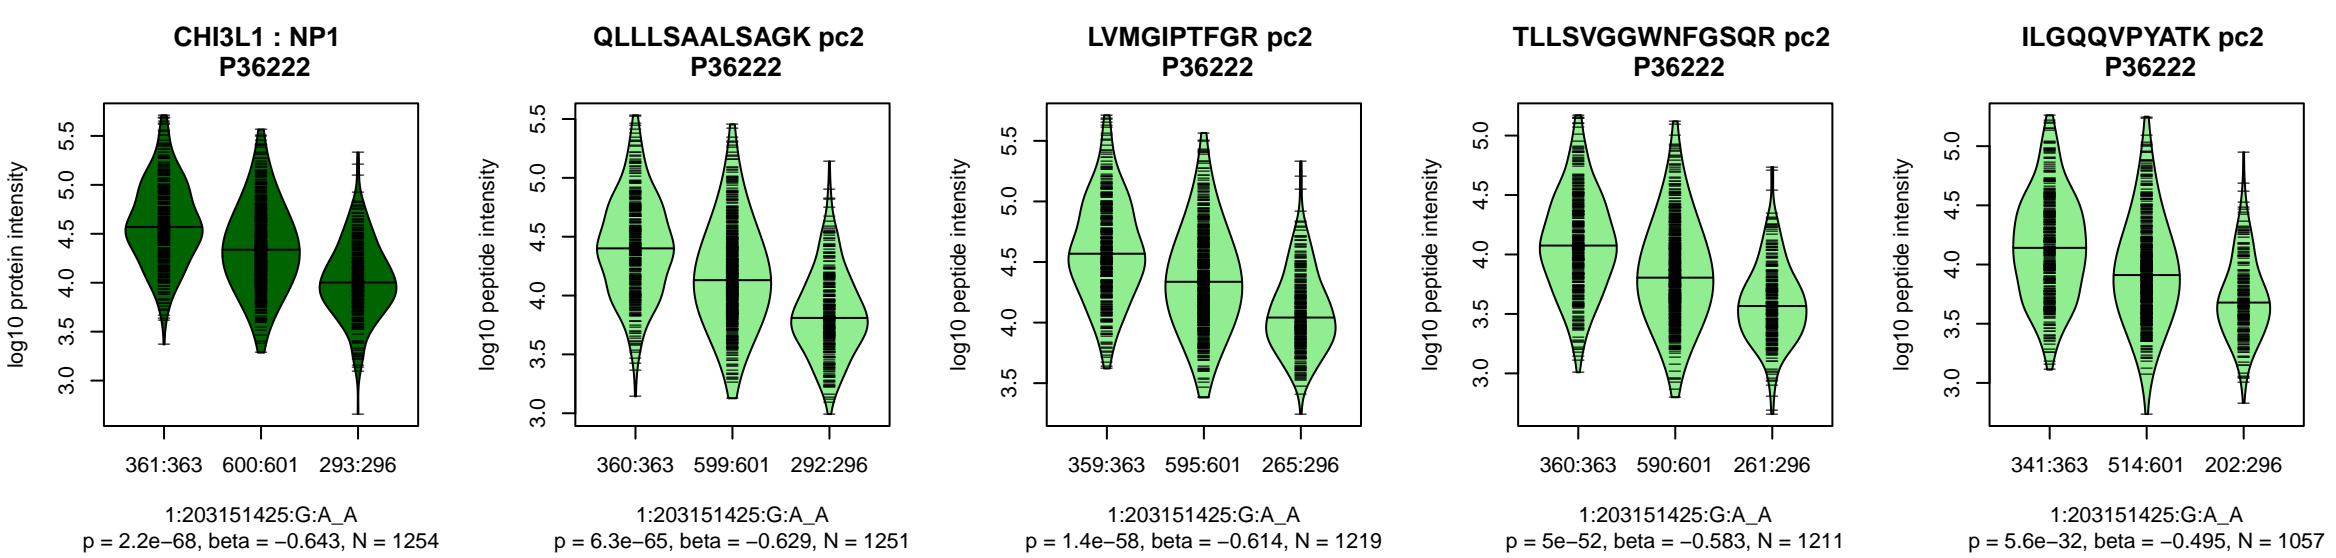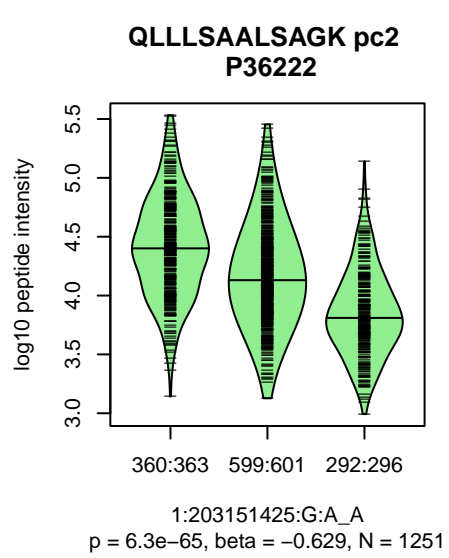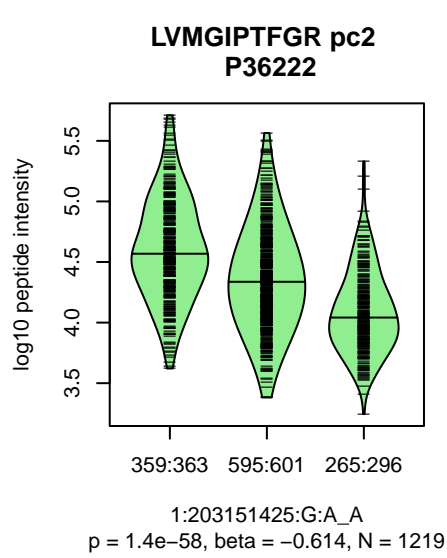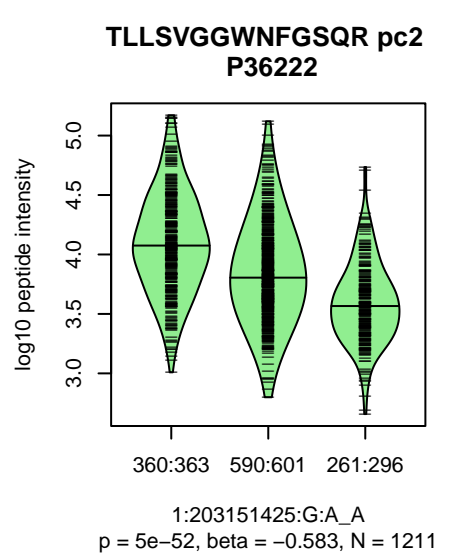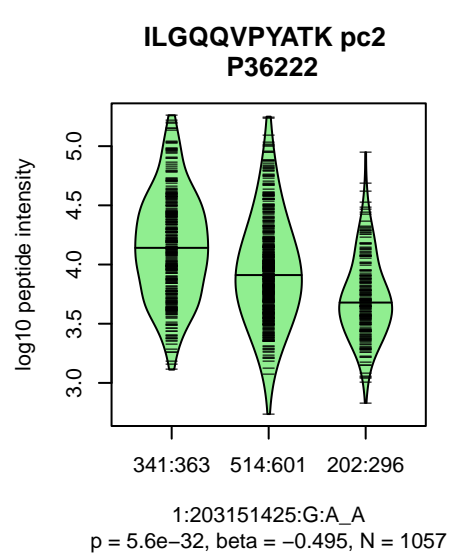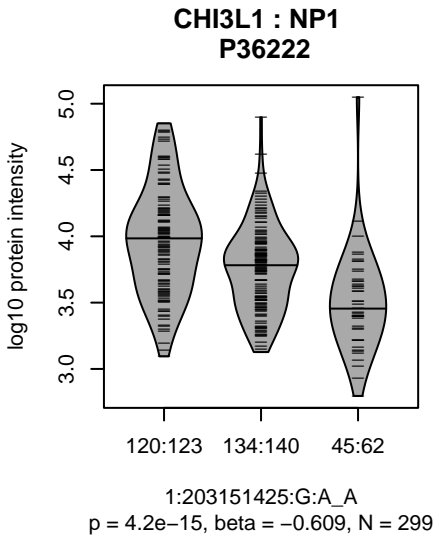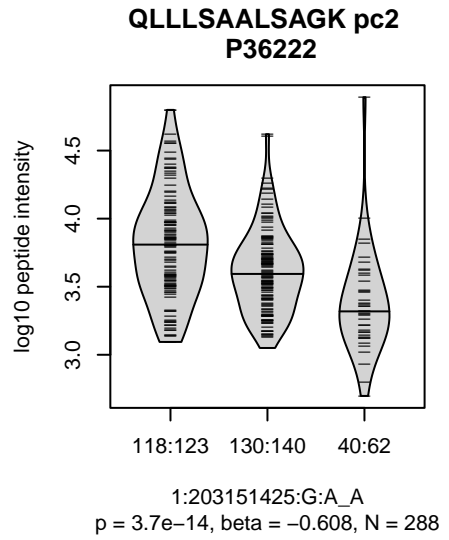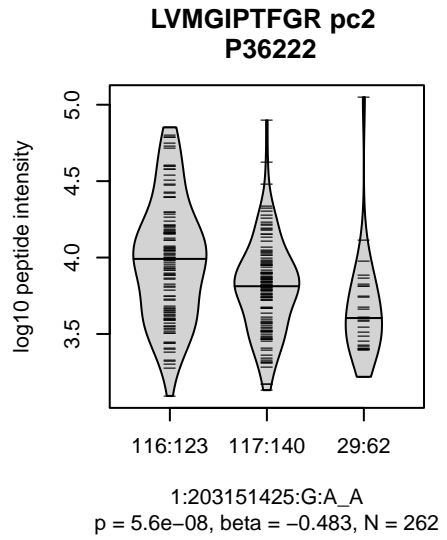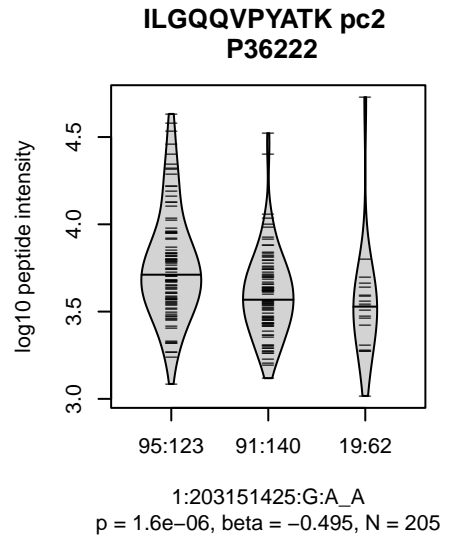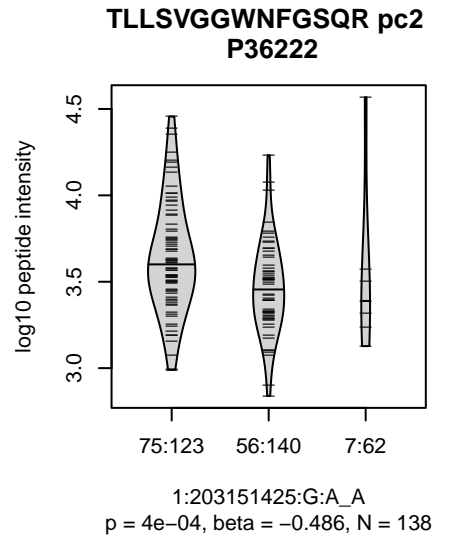

Assay Target: CHI3L1  
 Olink UniProt: P36222  
 deCODE rsID: rs12141494  
 Proxy rsID: rs12141494  
 deCODE: 1:203182297:G:A  
 Proxy SNP: 1:203151425:G:A  
 deCODE log10(p): 3455  
 deCODE BETA: 1  
 \*\*\*\*\*-:-:-:NA  
 1251:1219:1211:1057:993:708:6

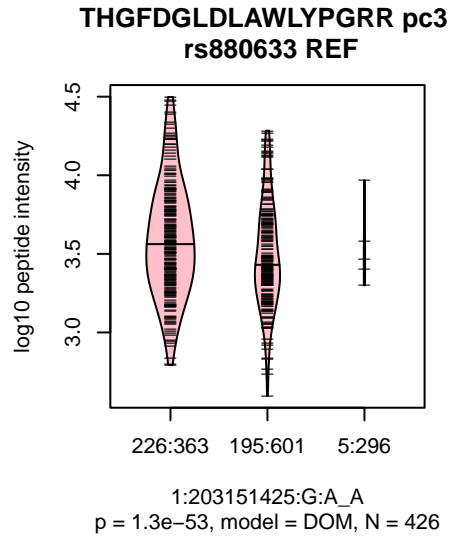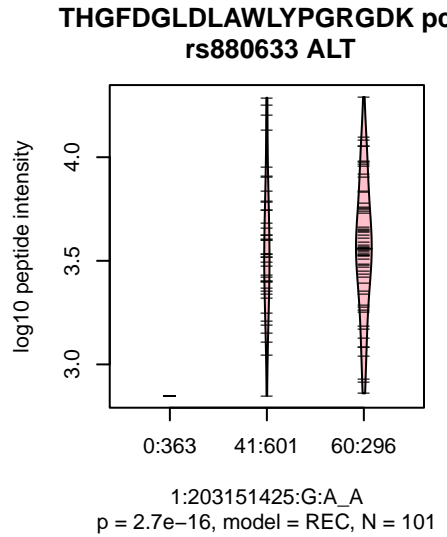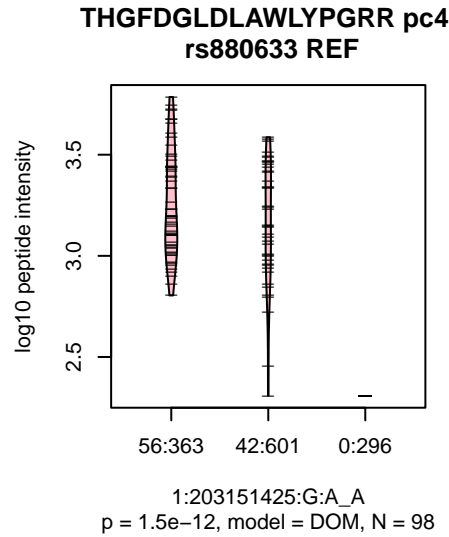



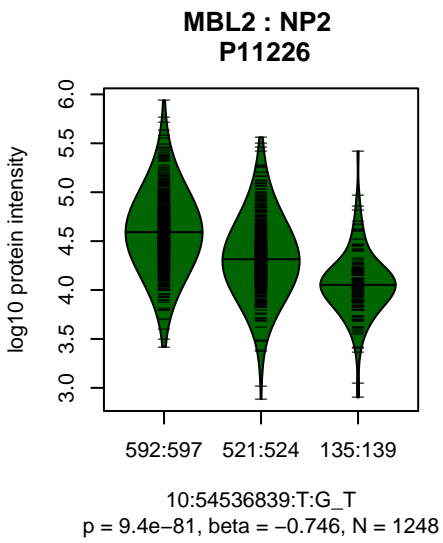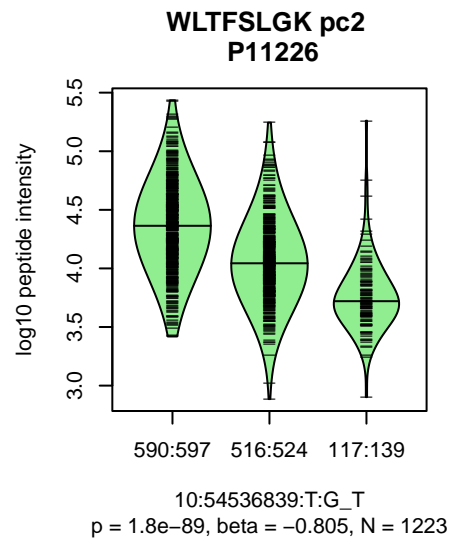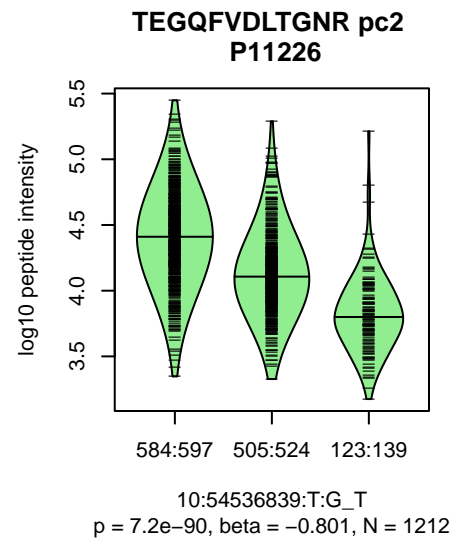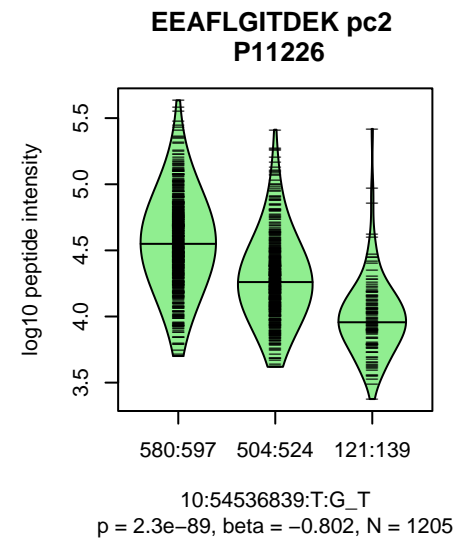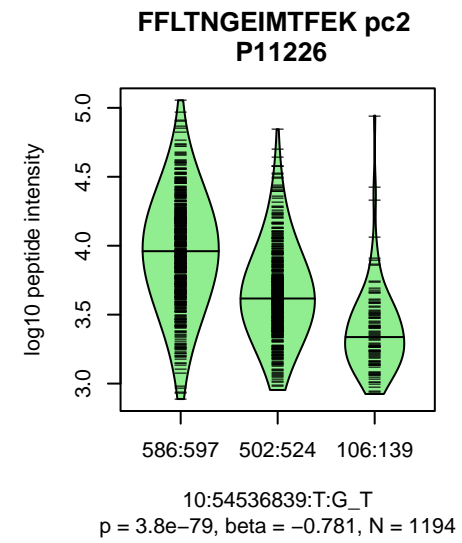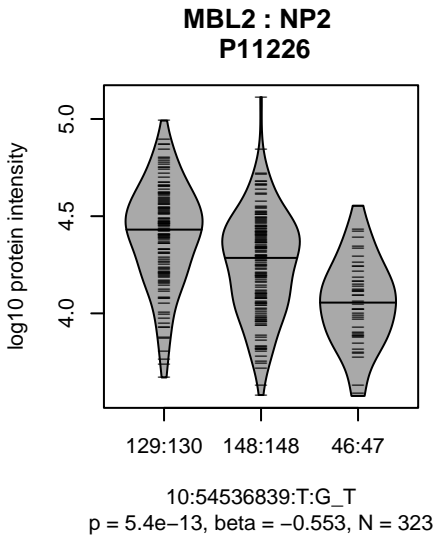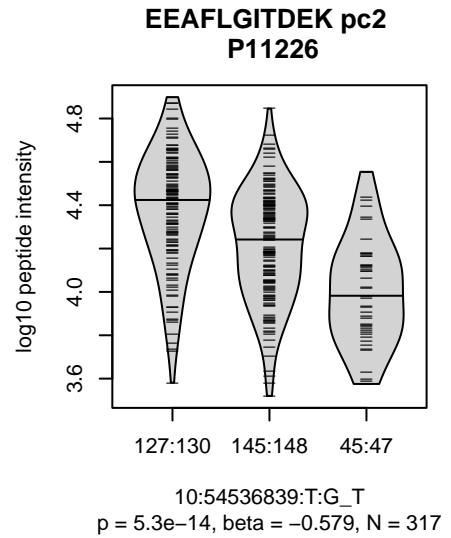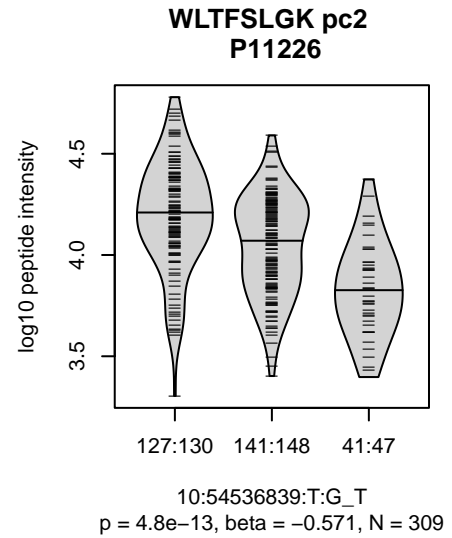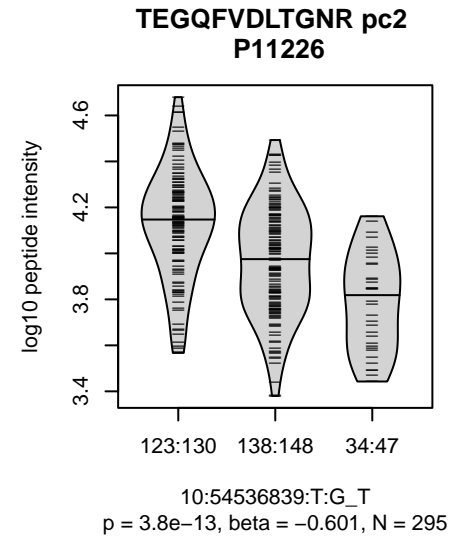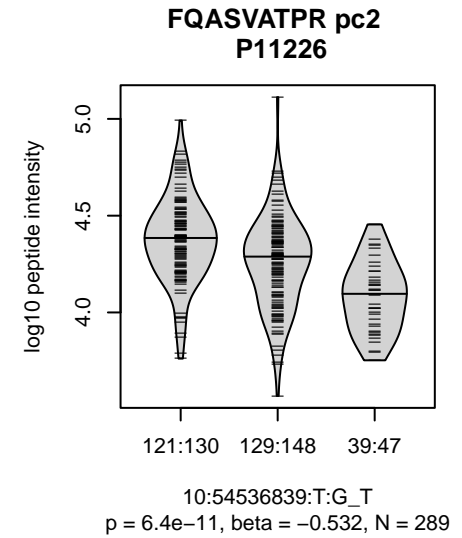

Assay Target: MBL2  
 Olink UniProt: P11226  
 deCODE rsID: rs7899547  
 Proxy rsID: rs7899547  
 deCODE: 10:52777079:T:G  
 Proxy SNP: 10:54536839:T:G  
 deCODE log10(p): 3017.5  
 deCODE BETA: -0.9  
 \*.\*.\*.\*.\*.\*.\*.\*:NA  
 1223:1212:1205:1194:1164:106





**GSTO1 : NP1**  
**P78417**

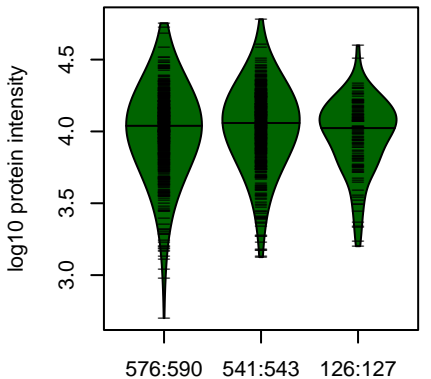

10:106028154:G:A\_A  
p = 0.83, beta = 0.00906, N = 1243

**HEVININLK pc2**  
**P78417-2;P78417-3;P78417**

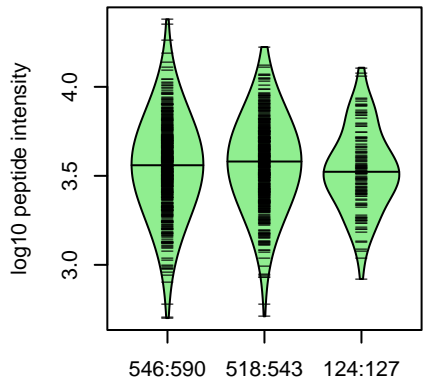

10:106028154:G:A\_A  
p = 0.54, beta = -0.0266, N = 1188

**VPSLVGSFIR pc2**  
**P78417-3;P78417**

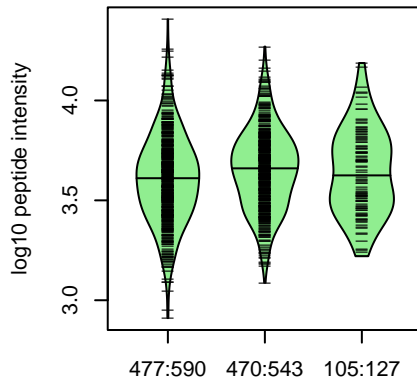

10:106028154:G:A\_A  
p = 0.056, beta = 0.0895, N = 1052

**EDPTVSALLTSEK pc2**  
**P78417-2;P78417-3;P78417**

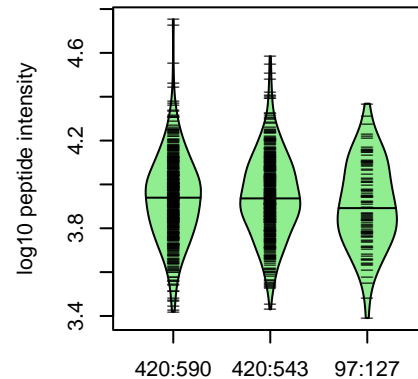

10:106028154:G:A\_A  
p = 0.39, beta = -0.0426, N = 937

**MILELFSKVPSLVGSFIR pc3**  
**P78417-3;P78417**

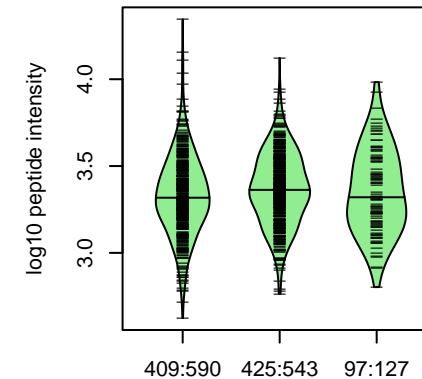

10:106028154:G:A\_A  
p = 0.2, beta = 0.0634, N = 931

**GSTO1 : NP1**  
**P78417**

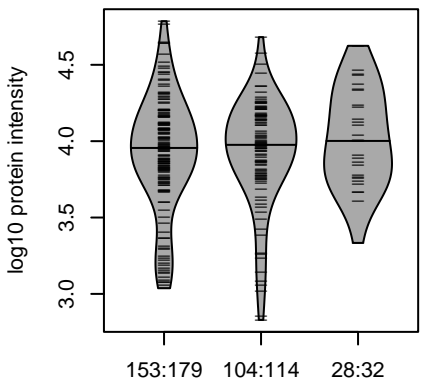

10:106028154:G:A\_A  
p = 0.26, beta = 0.0997, N = 285

**EDPTVSALLTSEK pc2**  
**P78417-2;P78417-3;P78417**

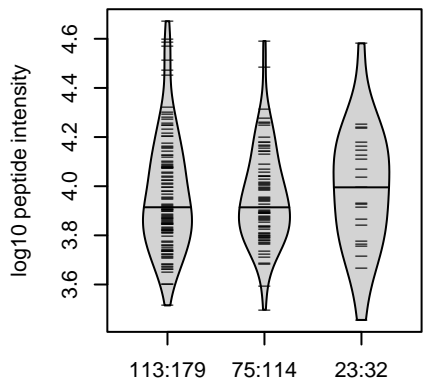

10:106028154:G:A\_A  
p = 0.88, beta = 0.0147, N = 211

**HEVININLK pc2**  
**P78417-2;P78417-3;P78417**

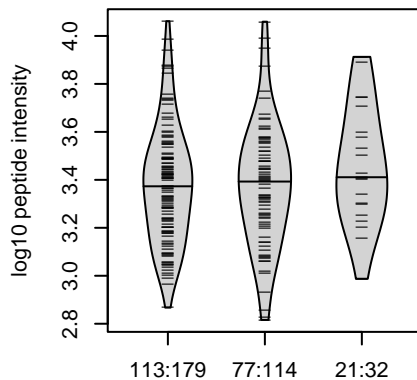

10:106028154:G:A\_A  
p = 0.19, beta = 0.133, N = 211

**GSAPPGVPEGSIR pc2**  
**P78417-2;P78417**

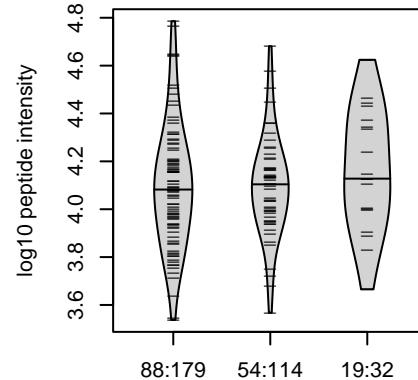

10:106028154:G:A\_A  
p = 0.53, beta = 0.0706, N = 161

**LEEVLTK pc2**  
**P78417-3;P78417**

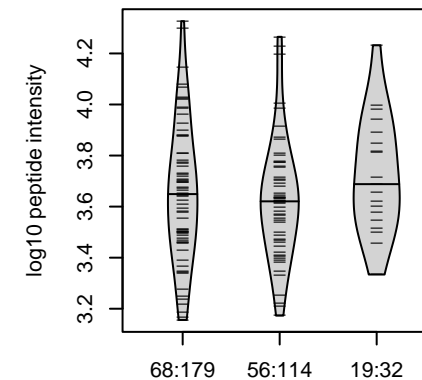

10:106028154:G:A\_A  
p = 0.43, beta = 0.0931, N = 143

Assay Target: GSTO1  
Olink UniProt: P78417  
deCODE rsID: rs45596840  
Proxy rsID: rs45596840  
deCODE: 10:104268396:A:G  
Proxy SNP: 10:106028154:G:A  
deCODE log10(p): 2443.9  
deCODE BETA: -0.82  
-----NA  
1188:1052:937:931:893:831:770





**CFHR4 : NP5**  
**Q92496;Q92496-2**

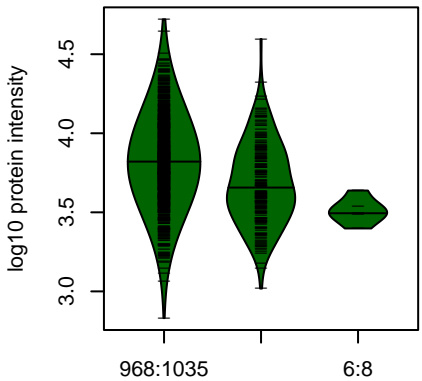

1:196887457:G:A\_A  
 $p = 2e-13$ ,  $\beta = -0.54$ ,  $N = 1165$

**TGDTIEFMCK pc2**  
**2985;Q02985-2;Q92496;Q92496-2;Q9**

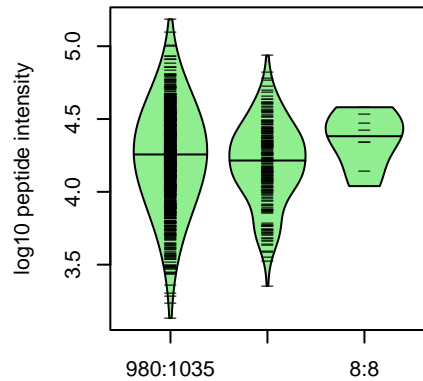

1:196887457:G:A\_A  
 $p = 0.096$ ,  $\beta = -0.117$ ,  $N = 1201$

**FCDMPVFENSR pc2**  
**Q92496;Q92496-2;Q92496-3**

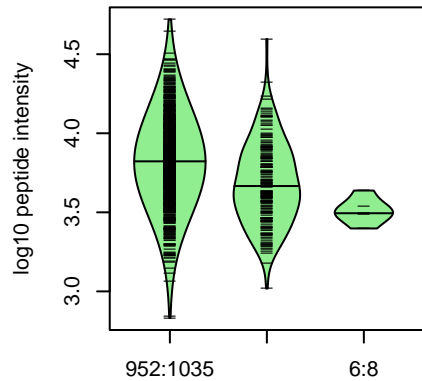

1:196887457:G:A\_A  
 $p = 1.2e-12$ ,  $\beta = -0.528$ ,  $N = 1144$

**CIHPCIITEENMNK pc3**  
**2985;Q02985-2;Q92496;Q92496-2;Q92985;Q02985-2;Q92496;Q92496-2;Q9**

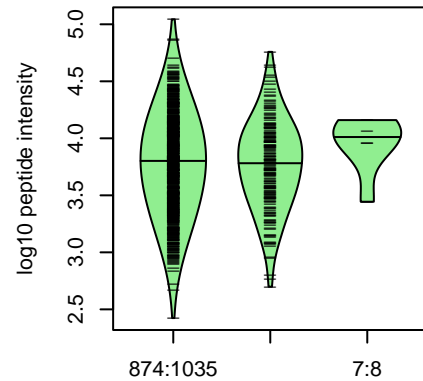

1:196887457:G:A\_A  
 $p = 0.81$ ,  $\beta = 0.0183$ ,  $N = 1060$

**VYVPQSR pc2**  
**2985;Q02985-2;Q92496;Q92496-2;Q9**

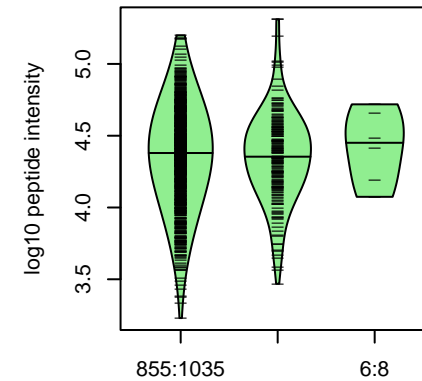

1:196887457:G:A\_A  
 $p = 0.65$ ,  $\beta = -0.0343$ ,  $N = 1047$

**CFHR4 : NP5**  
**Q92496;Q92496-2**

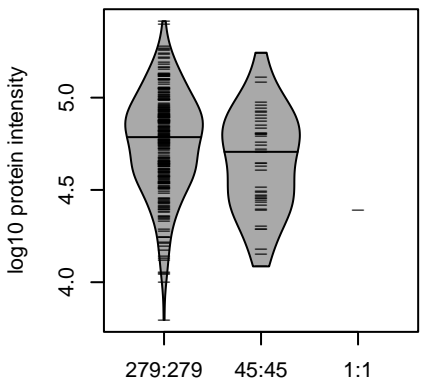

1:196887457:G:A\_A  
 $p = 0.0022$ ,  $\beta = -0.463$ ,  $N = 325$

**FCDMPVFENSR pc2**  
**Q92496;Q92496-2;Q92496-3**

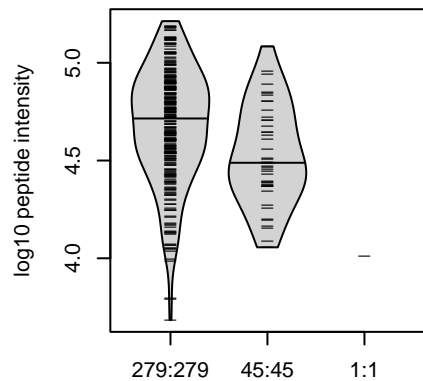

1:196887457:G:A\_A  
 $p = 3.4e-06$ ,  $\beta = -0.695$ ,  $N = 325$

**TGDTIEFMCK pc2**  
**2985;Q02985-2;Q92496;Q92496-2;Q92985;Q02985-2;Q92496;Q92496-2;Q9**

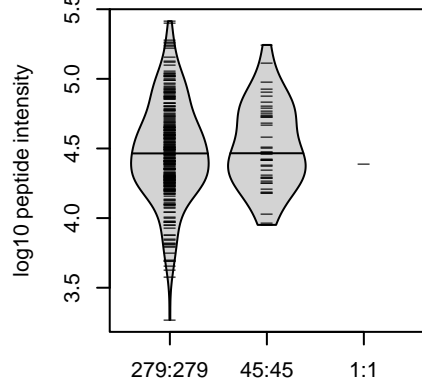

1:196887457:G:A\_A  
 $p = 0.71$ ,  $\beta = 0.0564$ ,  $N = 325$

**CIHPCIITEENMNK pc3**  
**2985;Q02985-2;Q92496;Q92496-2;Q9**

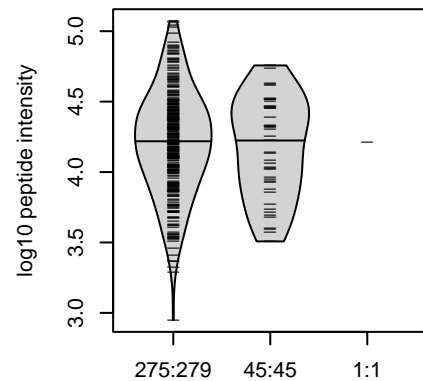

1:196887457:G:A\_A  
 $p = 0.53$ ,  $\beta = -0.096$ ,  $N = 321$

**VYLPWSR pc2**  
**Q92496;Q92496-2**

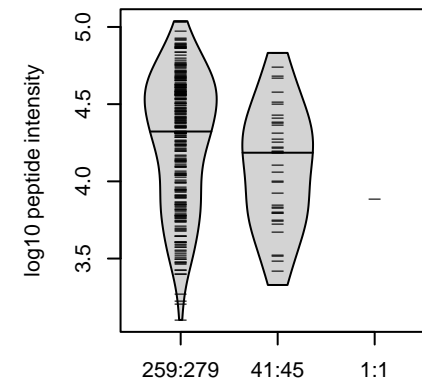

1:196887457:G:A\_A  
 $p = 0.0021$ ,  $\beta = -0.483$ ,  $N = 301$

Assay Target: CFHR4  
 Olink UniProt: Q92496  
 deCODE rsID: rs10494745  
 Proxy rsID: rs10494745  
 deCODE: 1:196918327:A:G  
 Proxy SNP: 1:196887457:G:A  
 deCODE log10(p): 2098.5  
 deCODE BETA: -0.97  
 - - \* - - - - - - - - - -  
 1201:1144:1060:1047:690:585:



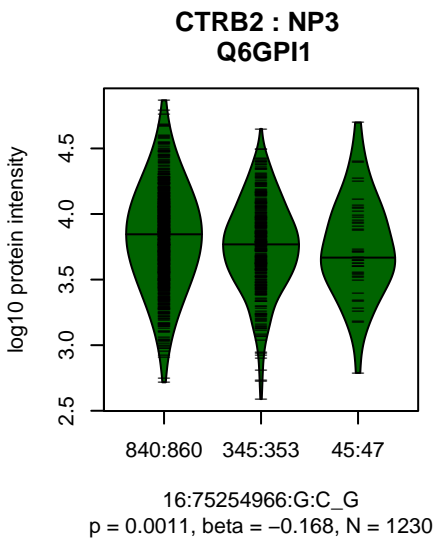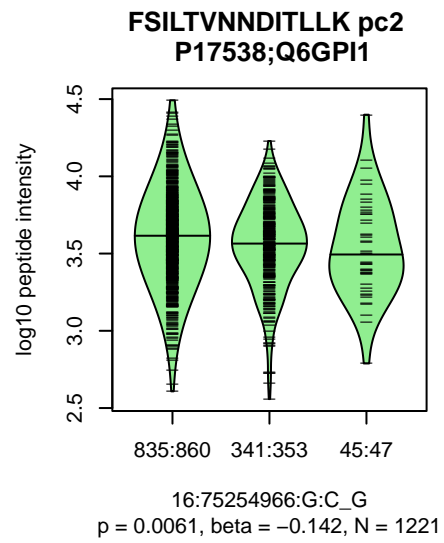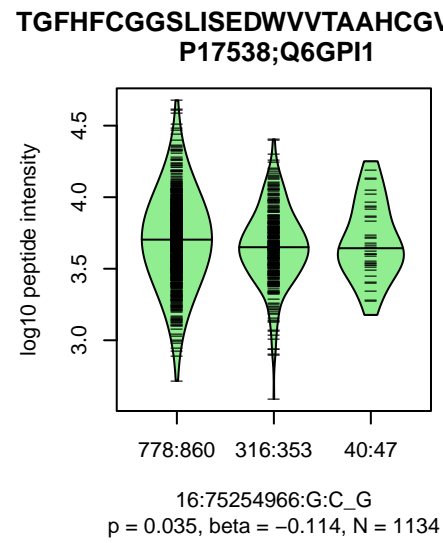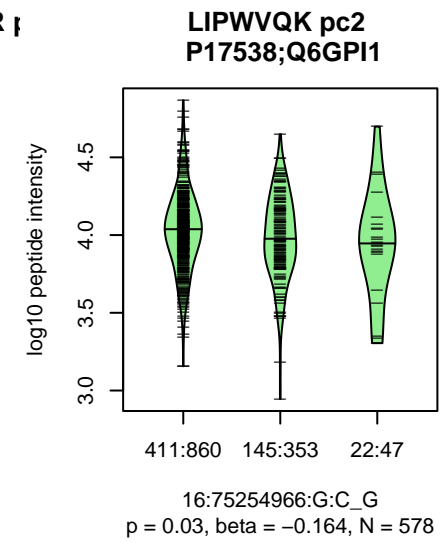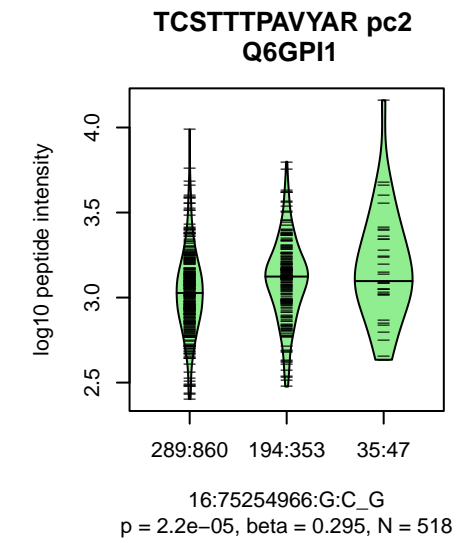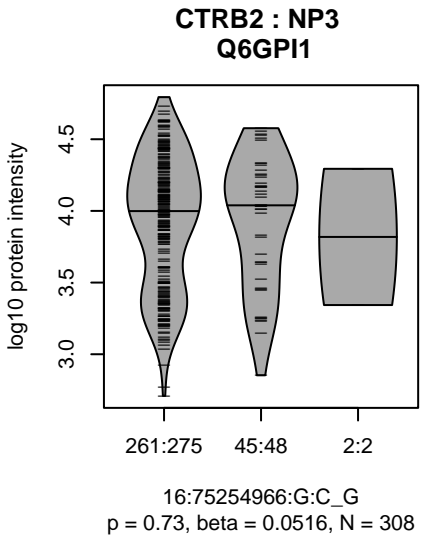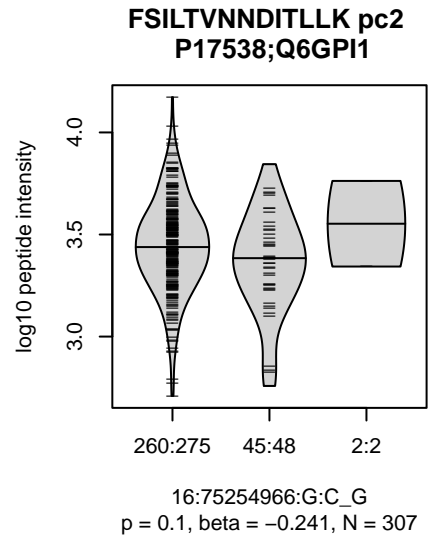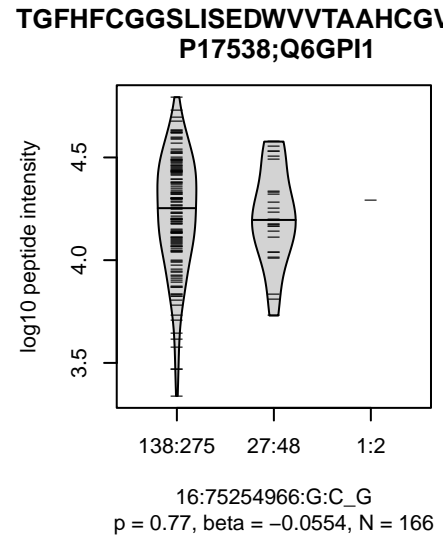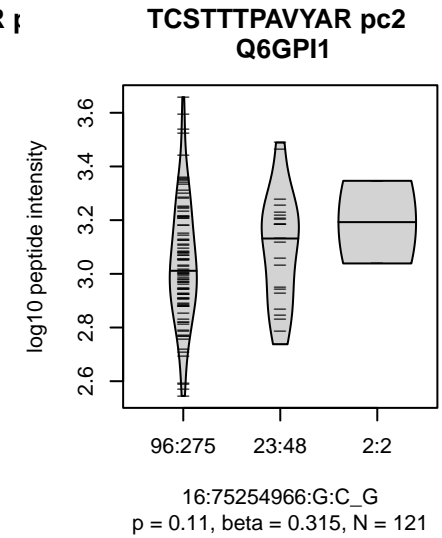

Assay Target: CTRB2  
 Olink UniProt: Q6GPI1  
 deCODE rsID: rs8048956  
 Proxy rsID: rs8048956  
 deCODE: 16:75221068:G:C  
 Proxy SNP: 16:75254966:G:C  
 deCODE log10(p): 1800.8  
 deCODE BETA: 0.86  
 \*:-:~\*:-:~  
 1221:1134:578:518:370:84



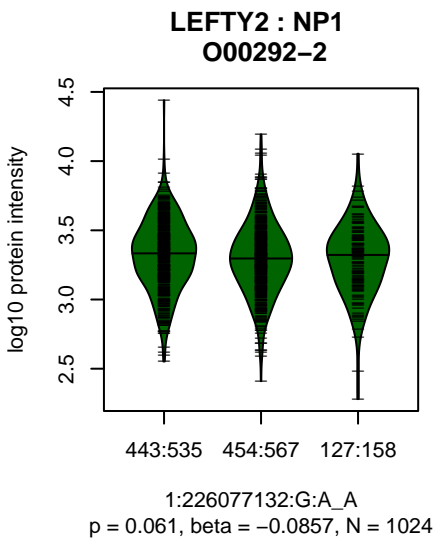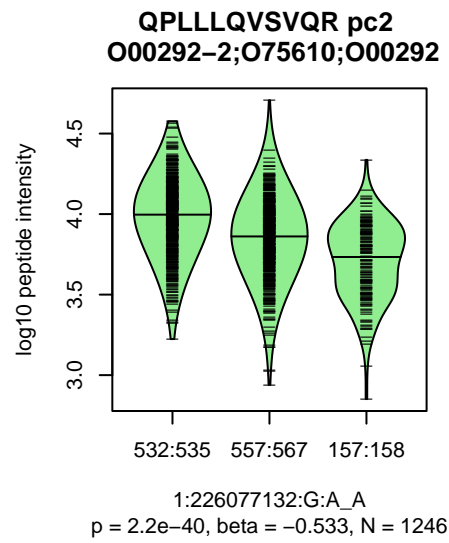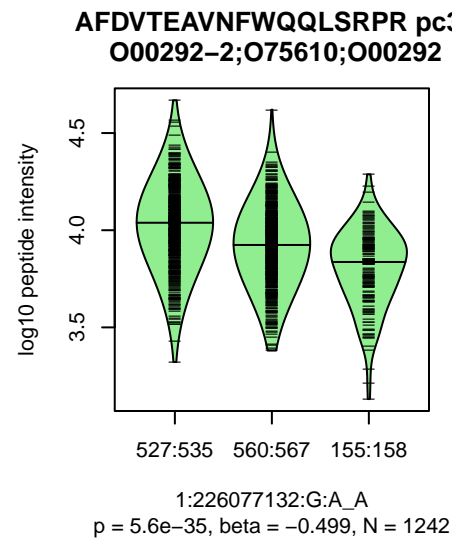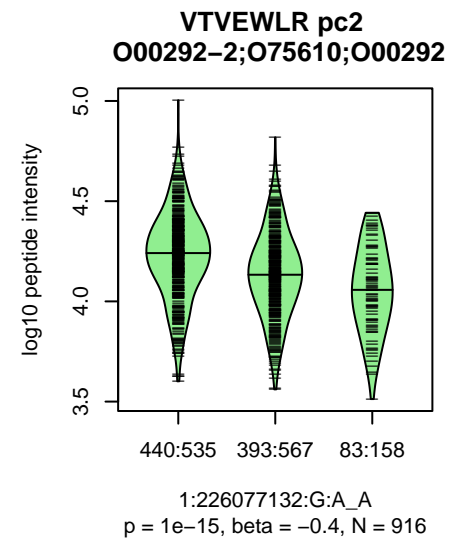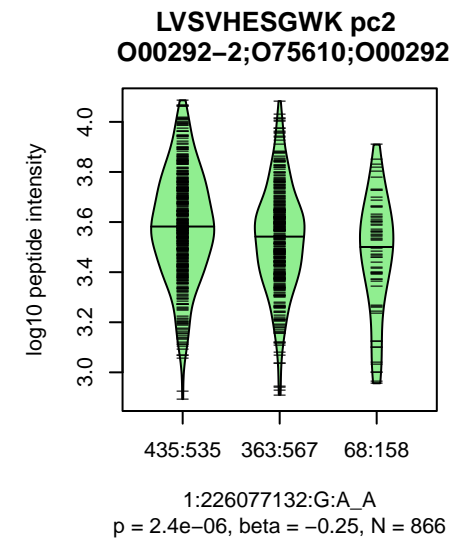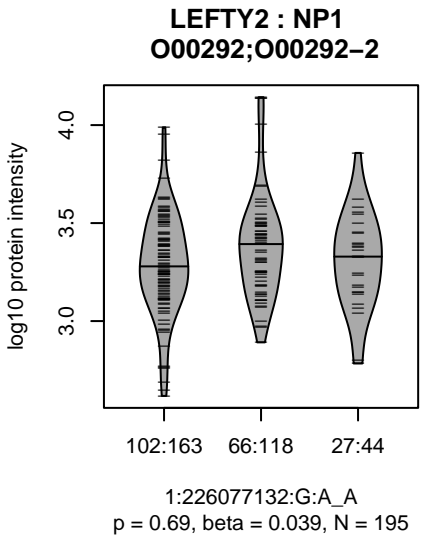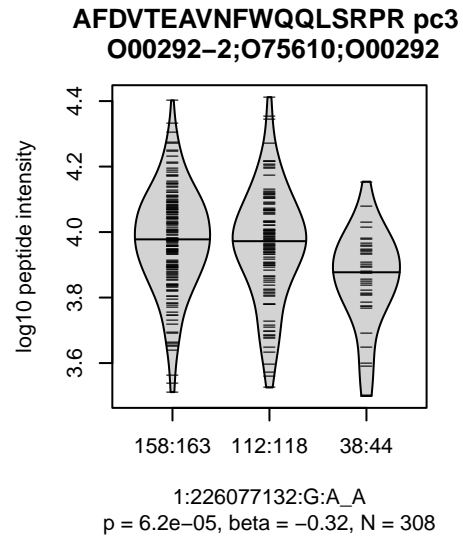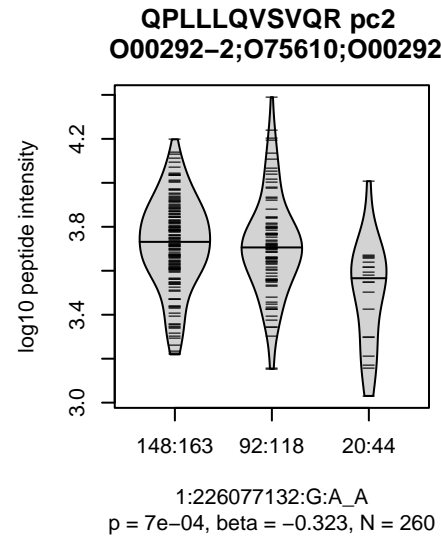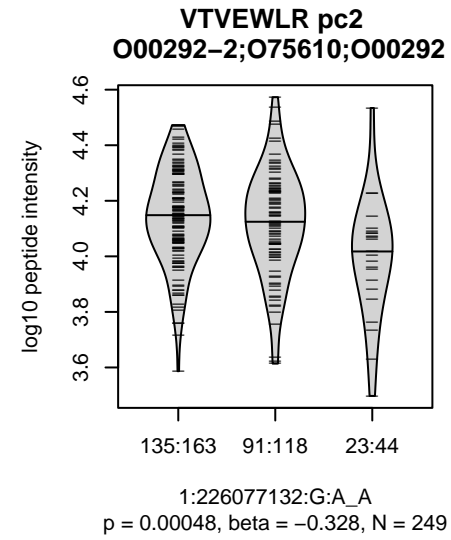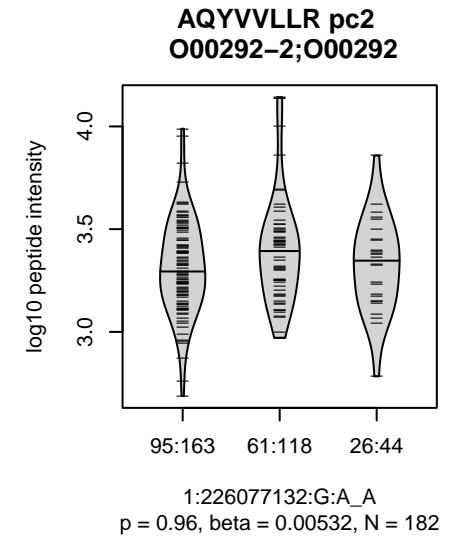

Assay Target: LEFTY2  
 Olink UniProt: O00292  
 deCODE rsID: rs360059  
 Proxy rsID: rs360059  
 deCODE: 1:225889432:A:G  
 Proxy SNP: 1:226077132:G:A  
 deCODE log10(p): 1700  
 deCODE BETA: -0.71  
 \*.\*.\*.\*-:-:-:-  
 1246:1242:916:866:856:628:337



**GNLY : NP4**  
**B4E3H9;P22749;P22749-2**

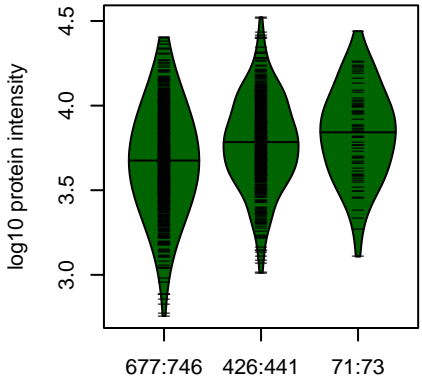

2:85933003:C:T\_T  
 p = 1.9e-08, beta = 0.267, N = 1174

**TCLTIVQK pc2**  
**B4E3H9;P22749;P22749-2**

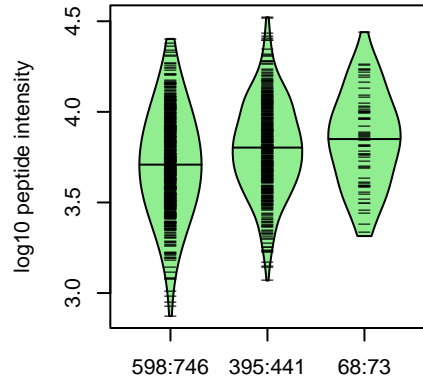

2:85933003:C:T\_T  
 p = 9.3e-06, beta = 0.219, N = 1061

**MVDKPTQR pc2**  
**B4E3H9;P22749;P22749-2**

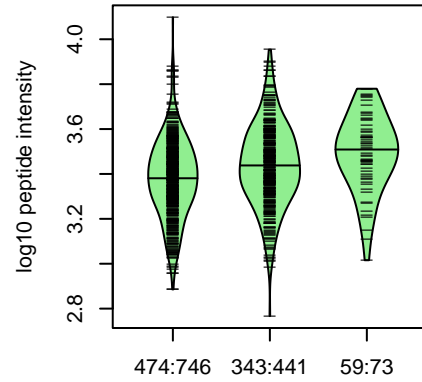

2:85933003:C:T\_T  
 p = 9.1e-08, beta = 0.287, N = 876

**SCPCLAQEGPQGDLLTK pc2**  
**B4E3H9;P22749;P22749-2**

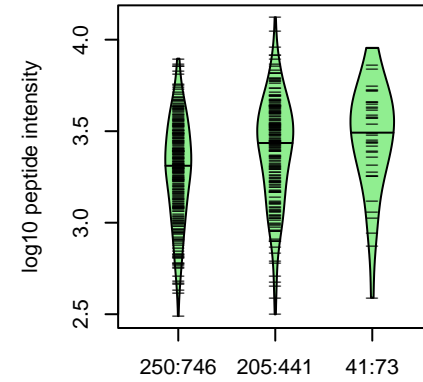

2:85933003:C:T\_T  
 p = 0.00011, beta = 0.268, N = 496

**GNLY : NP4**  
**B4E3H9;P22749;P22749-2**

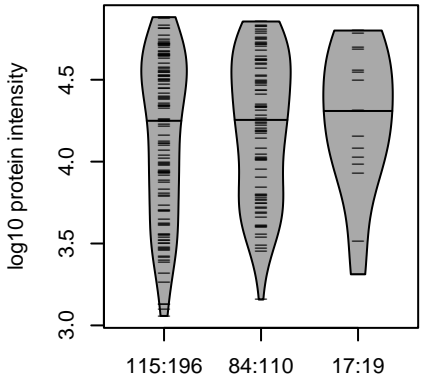

2:85933003:C:T\_T  
 p = 0.23, beta = 0.126, N = 216

**TCLTIVQK pc2**  
**B4E3H9;P22749;P22749-2**

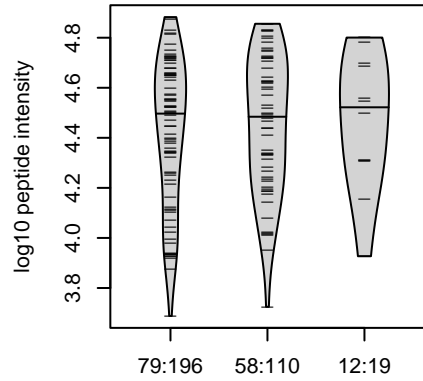

2:85933003:C:T\_T  
 p = 0.42, beta = 0.102, N = 149

**SCPCLAQEGPQGDLLTK pc2**  
**B4E3H9;P22749;P22749-2**

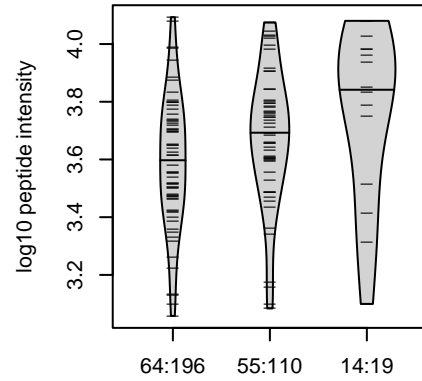

2:85933003:C:T\_T  
 p = 0.041, beta = 0.258, N = 133

**VIQGLVAGETAQQICEDLR pc3**  
**rs11127 ALT**

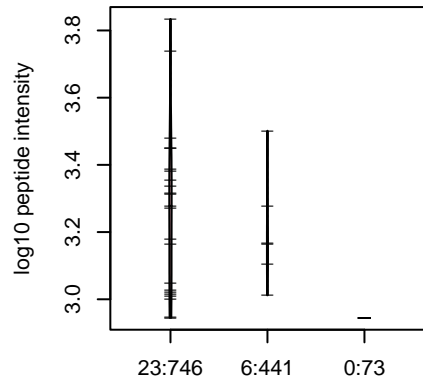

2:85933003:C:T\_T  
 p = 0.034, model = REC, N = 29

Assay Target: GNLY  
 Olink UniProt: P22749  
 deCODE rsID: rs12151742  
 Proxy rsID: rs12151742  
 deCODE: 2:85705880:T:C  
 Proxy SNP: 2:85933003:C:T  
 deCODE log10(p): 1527.6  
 deCODE BETA: 0.81  
 \*\*\*  
 1061:876:496

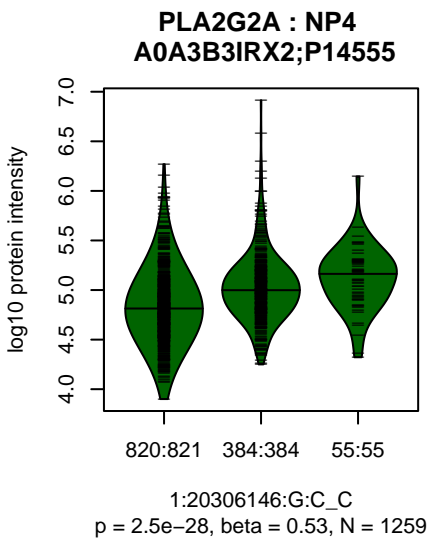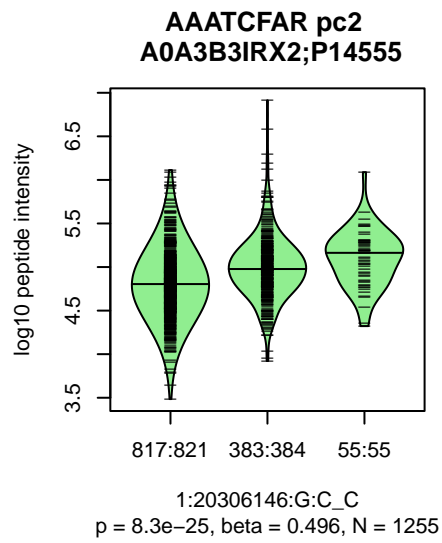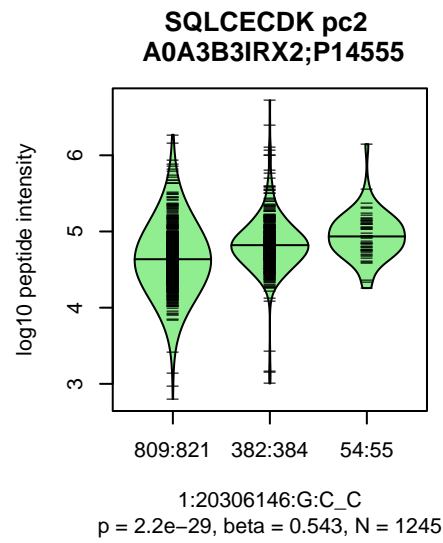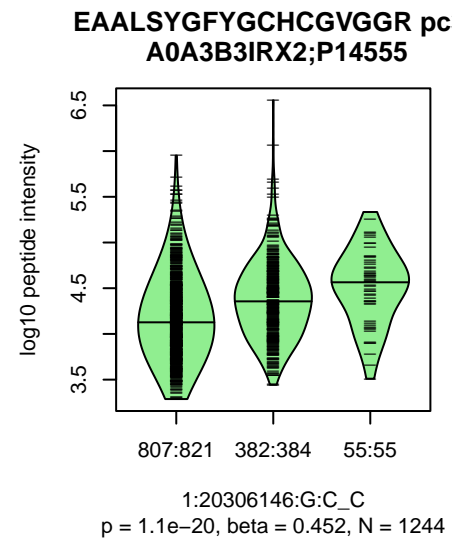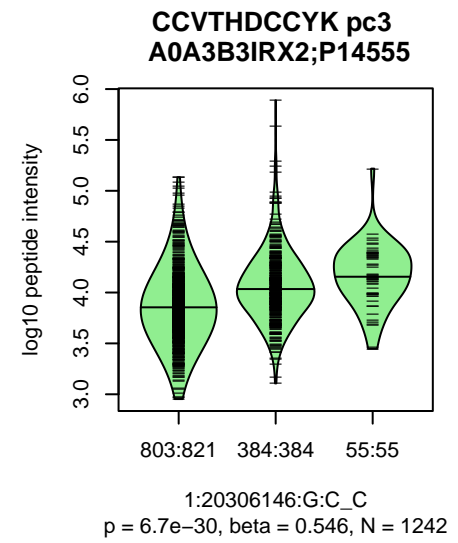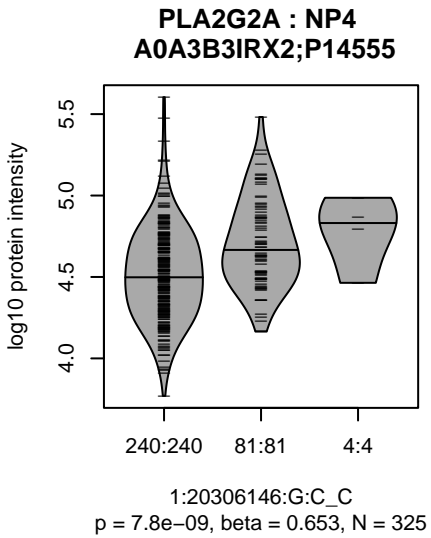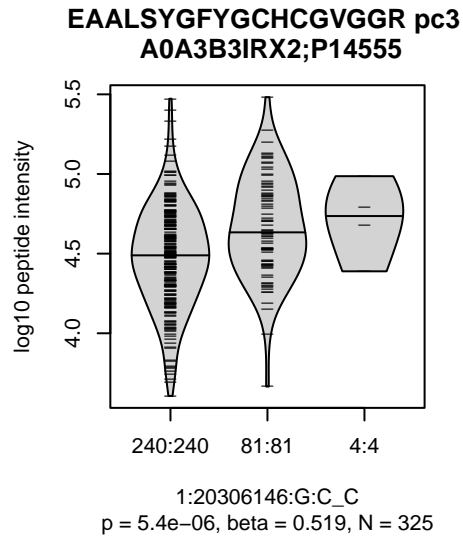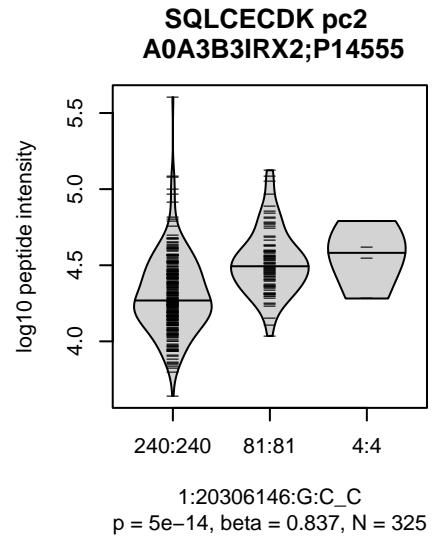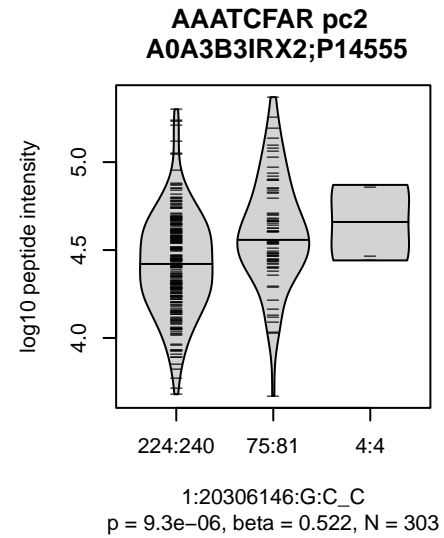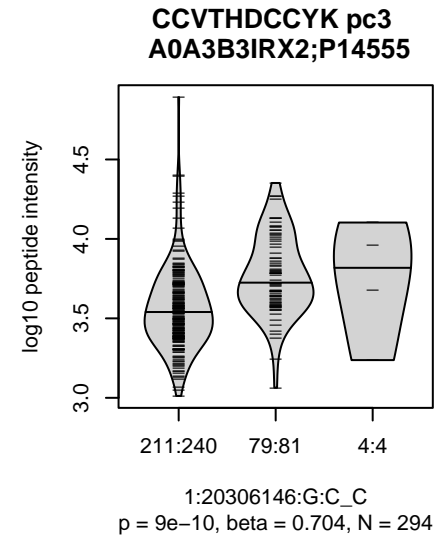

Assay Target: PLA2G2A  
Olink UniProt: P14555  
deCODE rsID: rs11573156  
Proxy rsID: rs11573156  
deCODE: 1:19979653:C:G  
Proxy SNP: 1:20306146:G:C  
deCODE log10(p): 1497.1  
deCODE BETA: 0.77  
\*.\*.\*.\*.\*  
1255:1245:1244:1242:1180:114



**TIMP3 : NP4**  
**P35625**

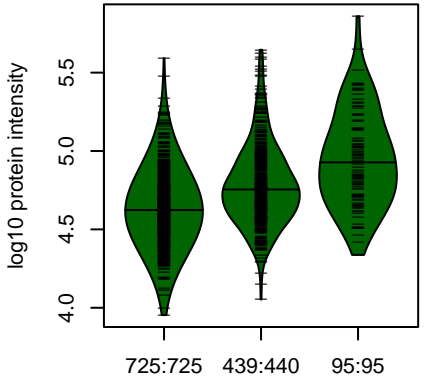

22:33166227:C:A\_C  
 $p = 3.6e-38$ ,  $\beta = 0.554$ ,  $N = 1259$

**SCYYLPCFVTSK pc2**  
**P35625**

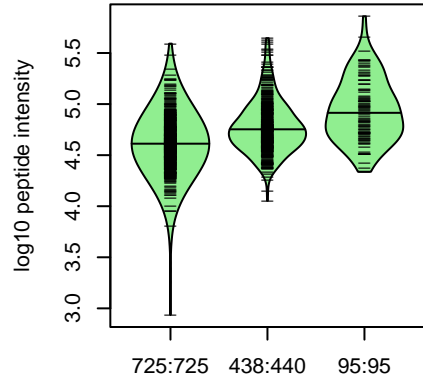

22:33166227:C:A\_C  
 $p = 7.7e-40$ ,  $\beta = 0.566$ ,  $N = 1258$

**EGPFGTLVYTIK pc2**  
**P35625**

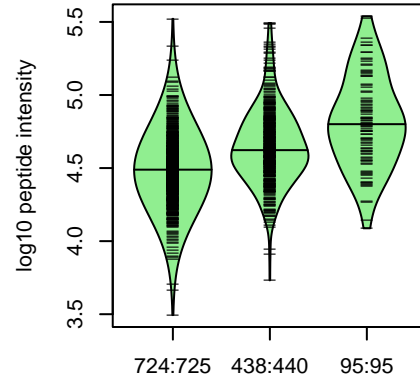

22:33166227:C:A\_C  
 $p = 3.1e-39$ ,  $\beta = 0.562$ ,  $N = 1257$

**MPHVQYIHTEASESLCGLK pc4**  
**P35625**

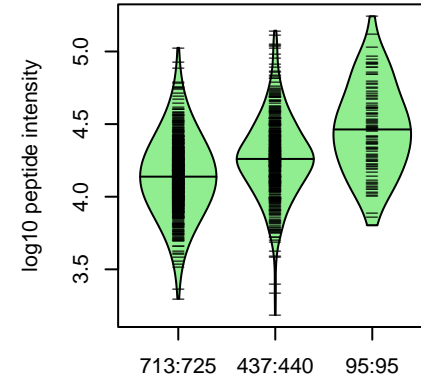

22:33166227:C:A\_C  
 $p = 6.3e-30$ ,  $\beta = 0.493$ ,  $N = 1245$

**YQYLLTGR pc2**  
**P35625**

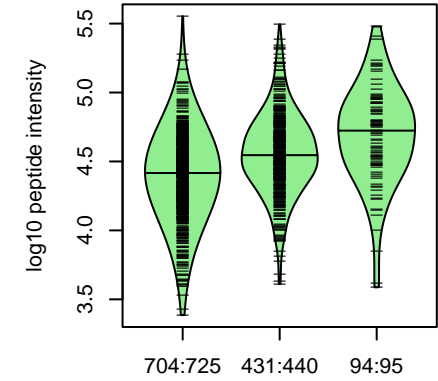

22:33166227:C:A\_C  
 $p = 1.1e-26$ ,  $\beta = 0.468$ ,  $N = 1229$

**TIMP3 : NP4**  
**P35625**

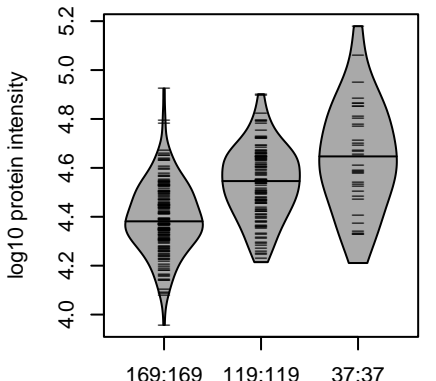

22:33166227:C:A\_C  
 $p = 1.4e-15$ ,  $\beta = 0.609$ ,  $N = 325$

**SCYYLPCFVTSK pc2**  
**P35625**

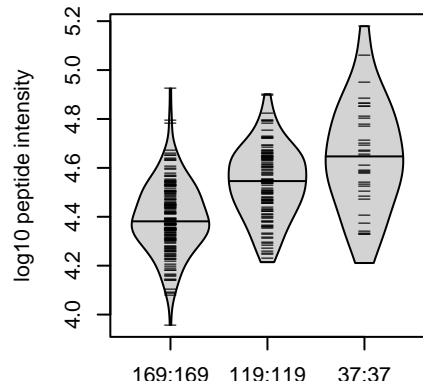

22:33166227:C:A\_C  
 $p = 1.4e-15$ ,  $\beta = 0.609$ ,  $N = 325$

**YHLGCNCK pc2**  
**P35625**

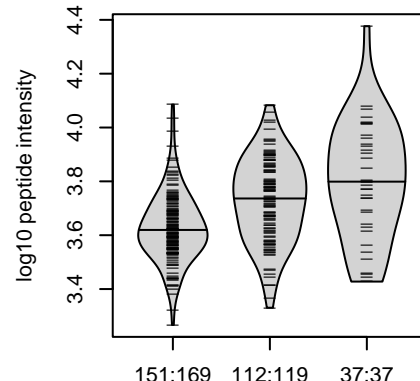

22:33166227:C:A\_C  
 $p = 2.9e-08$ ,  $\beta = 0.444$ ,  $N = 300$

**MPHVQYIHTEASESLCGLK pc4**  
**P35625**

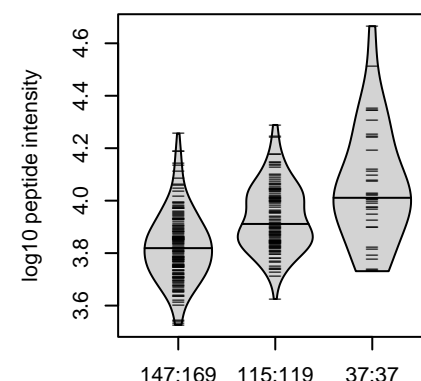

22:33166227:C:A\_C  
 $p = 1.8e-14$ ,  $\beta = 0.602$ ,  $N = 299$

**EGPFGTLVYTIK pc2**  
**P35625**

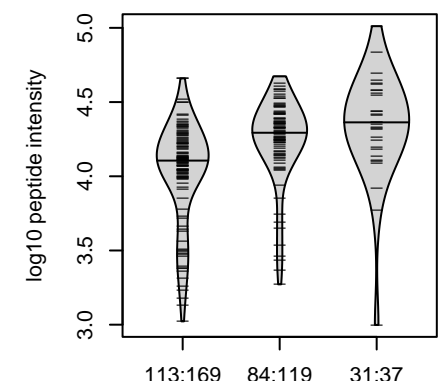

22:33166227:C:A\_C  
 $p = 2.2e-07$ ,  $\beta = 0.463$ ,  $N = 228$

Assay Target: TIMP3  
Olink UniProt: P35625  
deCODE rsID: rs4821102  
Proxy rsID: rs4821102  
deCODE: 22:32770241:C:A  
Proxy SNP: 22:33166227:C:A  
deCODE log10(p): 1471  
deCODE BETA: 0.78  
\*.\*.\*.\*.\*.\*.\*.\*  
1258:1257:1245:1229:1218:121

**SERPINE2 : NP3  
P07093**

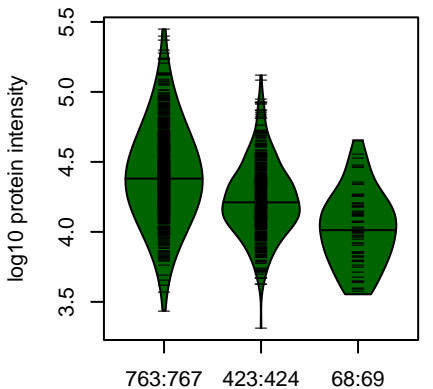

2:224874874:G:A\_A  
p = 5e-41, beta = -0.611, N = 1254

**VLGITDMFDSSK pc2  
P07093-3;P07093;P07093-2**

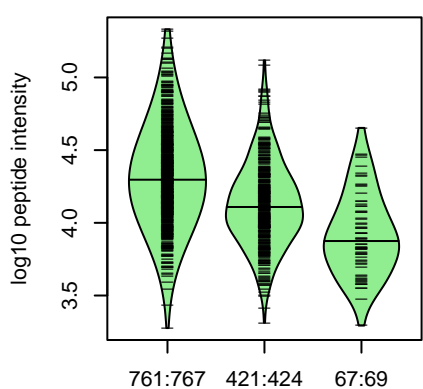

2:224874874:G:A\_A  
p = 1.8e-39, beta = -0.602, N = 1249

**LVLVNAVYFK pc2  
P07093-3;P07093;P07093-2**

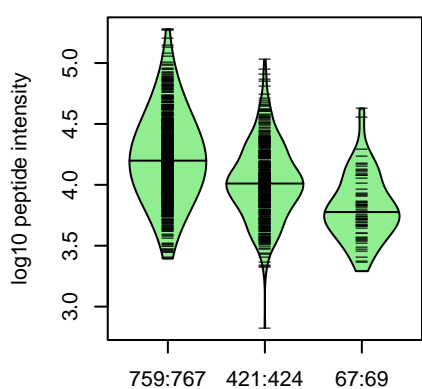

2:224874874:G:A\_A  
p = 3.5e-38, beta = -0.592, N = 1247

**SYQVPMLAQLSVFR pc2  
P07093-3;P07093;P07093-2**

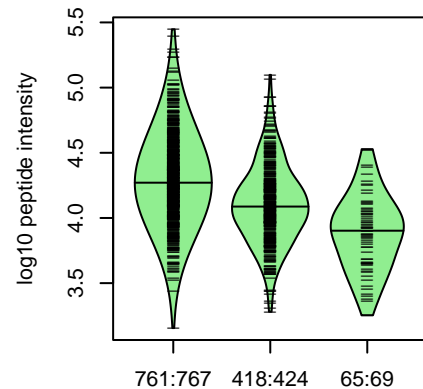

2:224874874:G:A\_A  
p = 3e-38, beta = -0.596, N = 1244

**DIVTVANAVFVK pc2  
P07093-3;P07093;P07093-2**

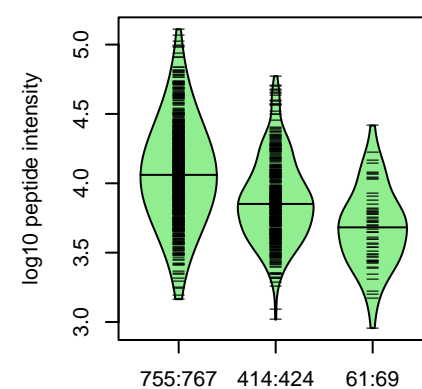

2:224874874:G:A\_A  
p = 6e-37, beta = -0.594, N = 1230

**SERPINE2 : NP3  
P07093**

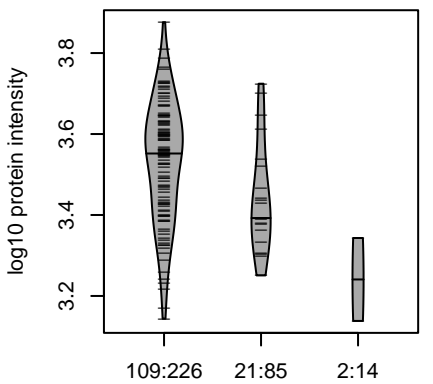

2:224874874:G:A\_A  
p = 0.0012, beta = -0.632, N = 132

**ASAATTAILIAR pc2  
P07093-3;P07093;P07093-2**

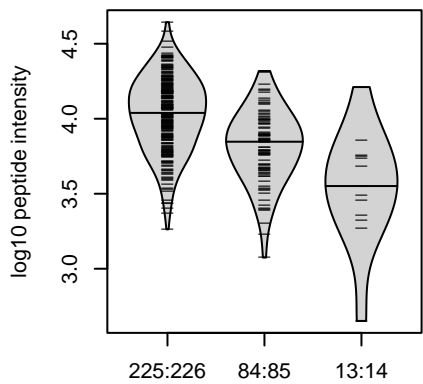

2:224874874:G:A\_A  
p = 7.6e-15, beta = -0.739, N = 322

**FTAVAQTDLK pc2  
P07093-3;P07093;P07093-2**

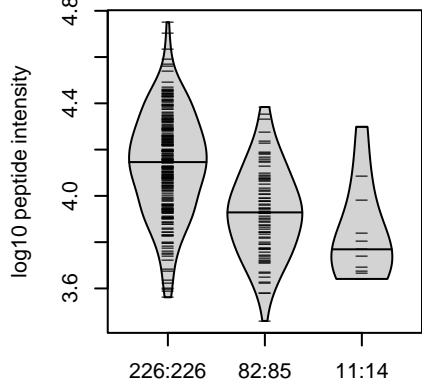

2:224874874:G:A\_A  
p = 4.4e-13, beta = -0.716, N = 319

**VLGITDMFDSSK pc2  
P07093-3;P07093;P07093-2**

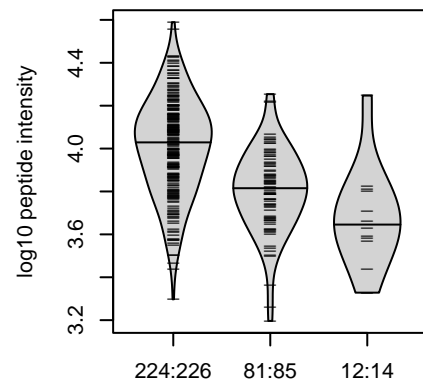

2:224874874:G:A\_A  
p = 1.8e-14, beta = -0.745, N = 317

**LVLVNAVYFK pc2  
P07093-3;P07093;P07093-2**

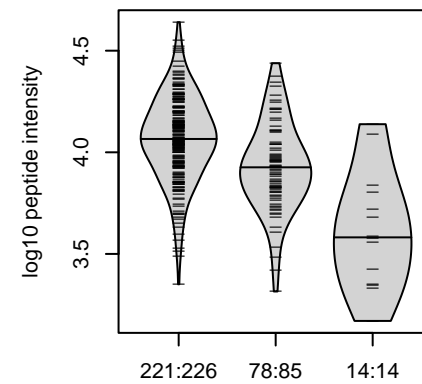

2:224874874:G:A\_A  
p = 1.4e-12, beta = -0.679, N = 313

Assay Target: SERPINE2  
Olink UniProt: P07093  
deCODE rsID: rs13412535  
Proxy rsID: rs13412535  
deCODE: 2:224010157:A:G  
Proxy SNP: 2:224874874:G:A  
deCODE log10(p): 1403.2  
deCODE BETA: -0.8  
\*\*\*\*\*-:-N  
1249:1247:1244:1230:1204:118



**LBP : NP4  
P18428**

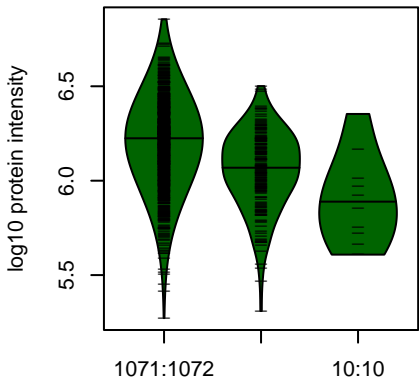

20:36997655:C:T\_T  
p = 8.3e-20, beta = -0.653, N = 1259

**ATAQMLEVMFK pc2  
P18428**

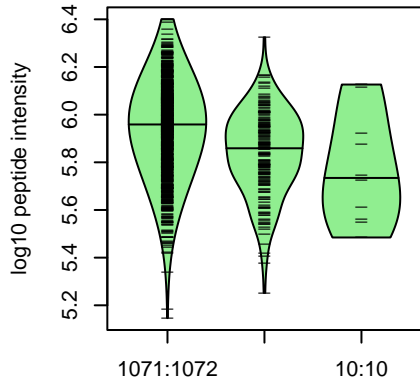

20:36997655:C:T\_T  
p = 1.2e-12, beta = -0.513, N = 1259

**DFLFLGANVQYMR pc2  
P18428**

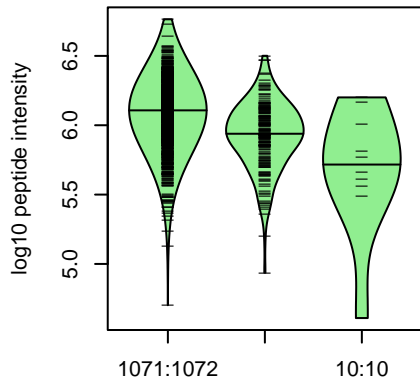

20:36997655:C:T\_T  
p = 5.6e-19, beta = -0.638, N = 1259

**ICEMIQQ pc2  
P18428**

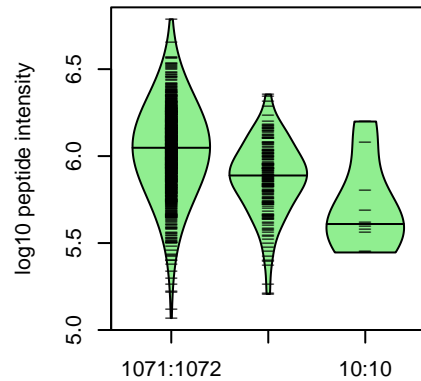

20:36997655:C:T\_T  
p = 1.7e-22, beta = -0.698, N = 1259

**ITLPDFTGDLR pc2  
P18428**

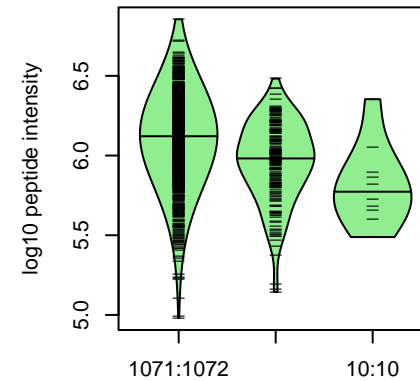

20:36997655:C:T\_T  
p = 3.9e-13, beta = -0.523, N = 1259

**LBP : NP4  
P18428**

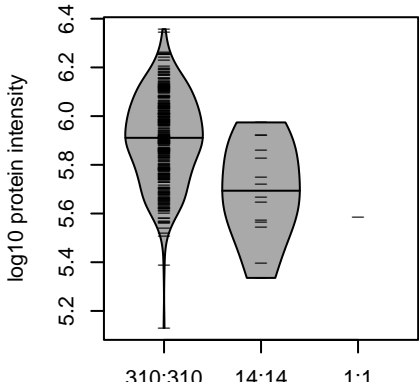

20:36997655:C:T\_T  
p = 2.3e-05, beta = -0.995, N = 325

**ATAQMLEVMFK pc2  
P18428**

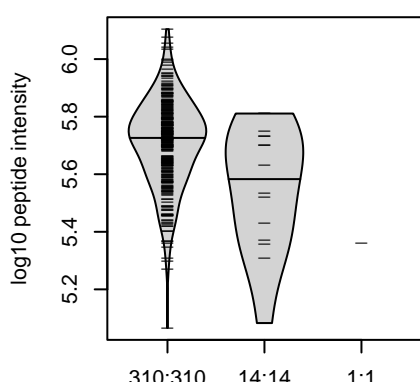

20:36997655:C:T\_T  
p = 2e-04, beta = -0.877, N = 325

**DFLFLGANVQYMR pc2  
P18428**

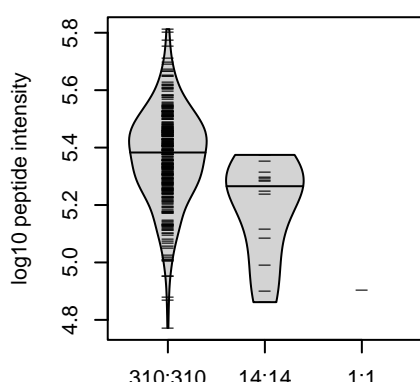

20:36997655:C:T\_T  
p = 2.9e-05, beta = -0.983, N = 325

**ICEMIQQ pc2  
P18428**

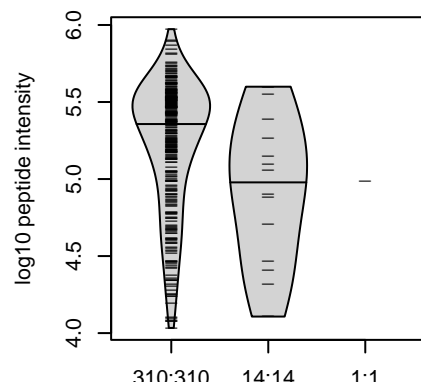

20:36997655:C:T\_T  
p = 0.059, beta = -0.449, N = 325

**ITLPDFTGDLRIPHVGR pc4  
P18428**

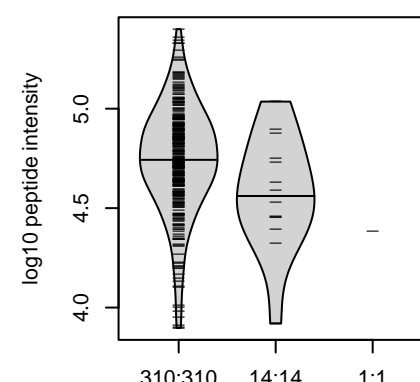

20:36997655:C:T\_T  
p = 0.013, beta = -0.591, N = 325

**VGLFNAELLEALLNYYILNTLYPK pc rs2232618 ALT    VGLFNAELLEALLNYYILNTFYPK pc rs2232618 REF**

Assay Target: LBP  
Olink UniProt: P18428  
deCODE rsID: rs2232613  
Proxy rsID: rs2232613  
deCODE: 20:38369011:T:C  
Proxy SNP: 20:36997655:C:T  
deCODE log10(p): 1358.6  
deCODE BETA: -1.05  
\*\*\*\*\*  
1259:1259:1259:1259:1259:125

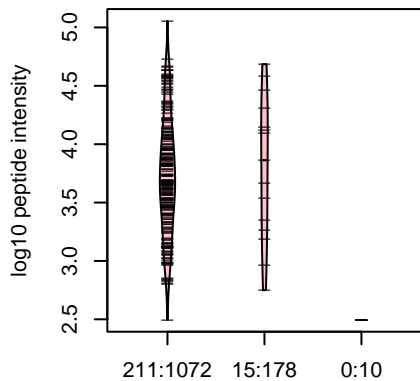

20:36997655:C:T\_T  
p = 5e-05, model = REC, N = 226

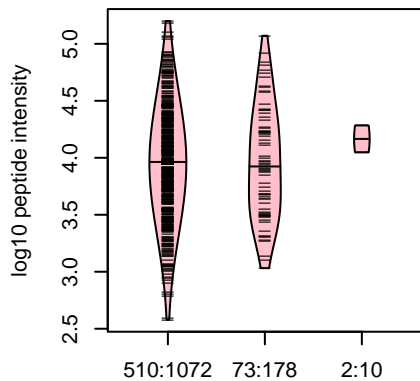

20:36997655:C:T\_T  
p = 0.057, model = REC, N = 585

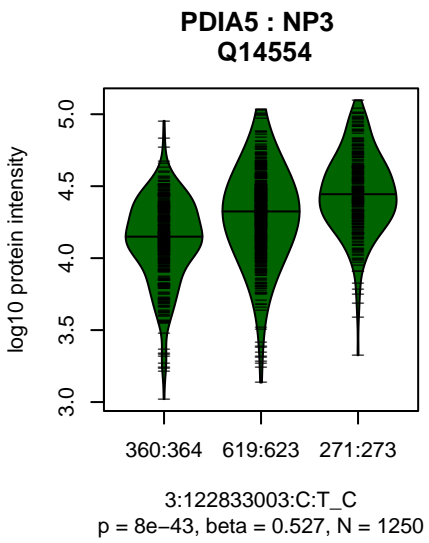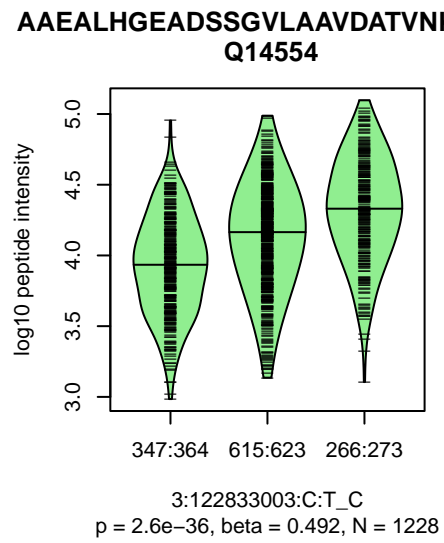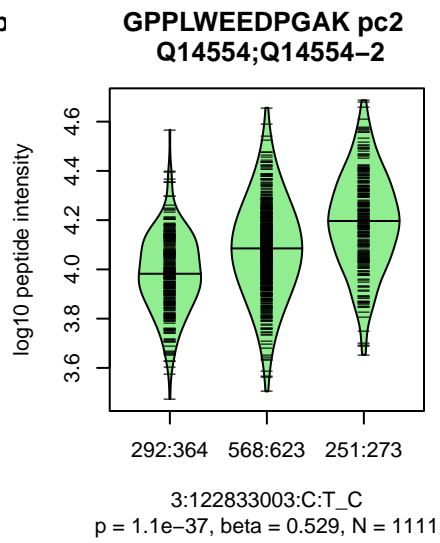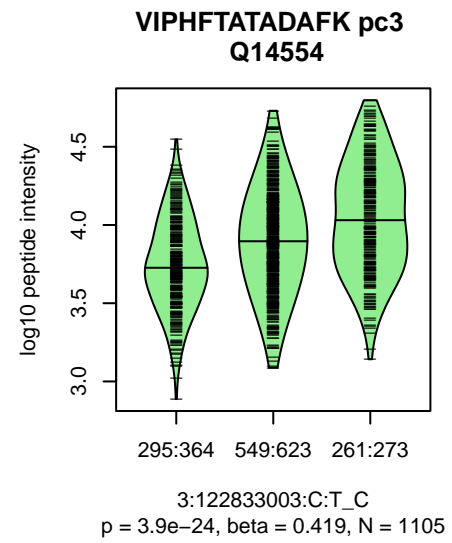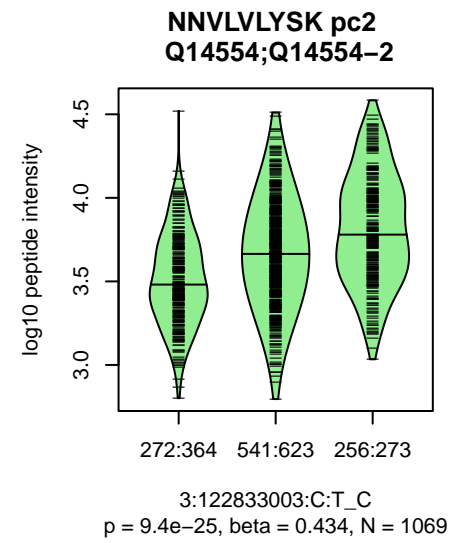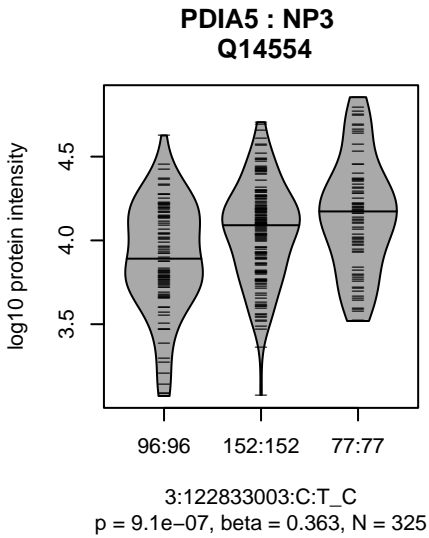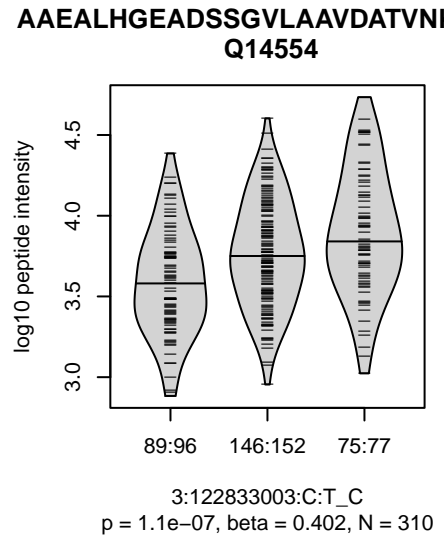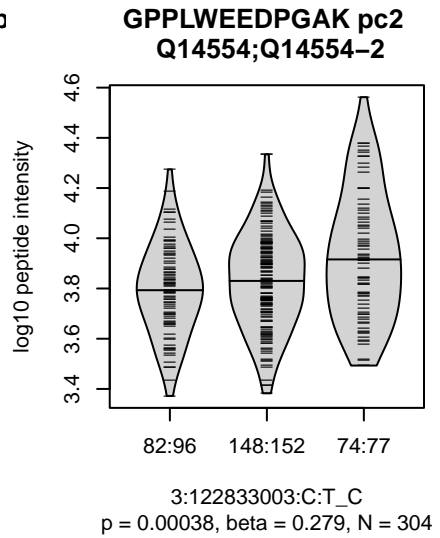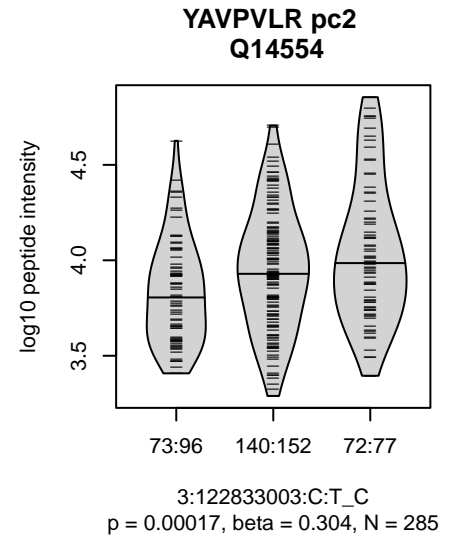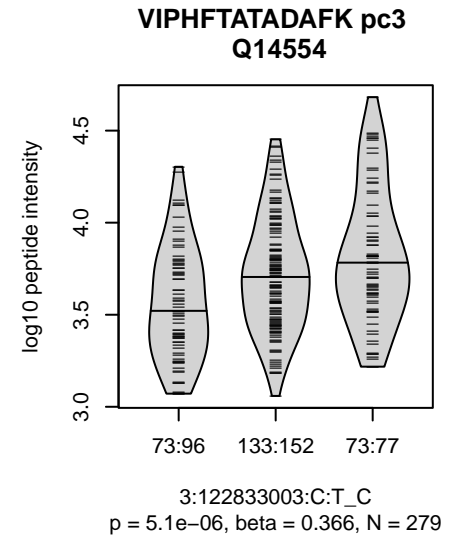

Assay Target: PDIA5  
 Olink UniProt: Q14554  
 deCODE rsID: rs3804749  
 Proxy rsID: rs3804749  
 deCODE: 3:123114156:C:T  
 Proxy SNP: 3:122833003:C:T  
 deCODE log10(p): 1276  
 deCODE BETA: 0.63  
 .....  
 1228:1111:1105:1069:1051:100



**SERPING1 : NP4**  
**P05155;P05155-3**

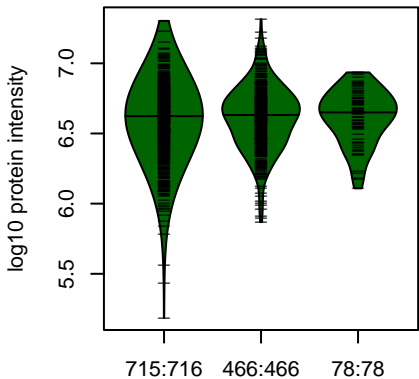

11:57383575:G:T\_T  
p = 0.32, beta = 0.0456, N = 1259

**LLDSLPSDTR pc2**

**JA7I2V5R3;E9PGN7;H9KV48;P05155-V2;A0A7I2V5R3;H9KV48;P05155-3;P0A7I2V5R3;E9PGN7;H9KV48;P05155-V2X2;A0A7I2V4I9;A0A7I2V5R3;E9PGN7**

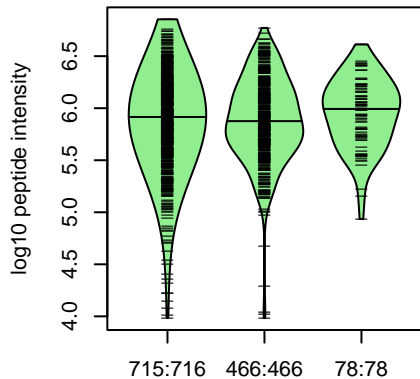

11:57383575:G:T\_T  
p = 0.45, beta = 0.0344, N = 1259

**LVLLNAIYLSAK pc2**

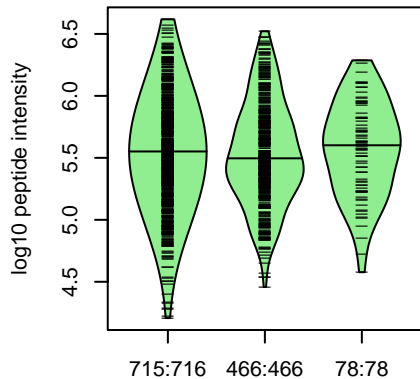

11:57383575:G:T\_T  
p = 0.9, beta = 0.00571, N = 1259

**TLYSSSPR pc2**

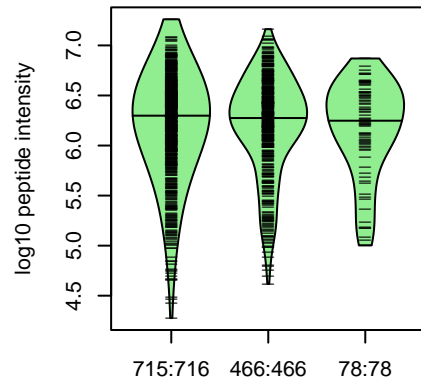

11:57383575:G:T\_T  
p = 0.61, beta = -0.0235, N = 1259

**TNLESILSYPK pc2**

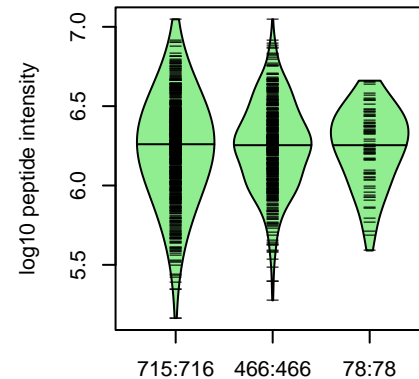

11:57383575:G:T\_T  
p = 0.54, beta = 0.0285, N = 1259

**SERPING1 : NP4**  
**P05155;P05155-3**

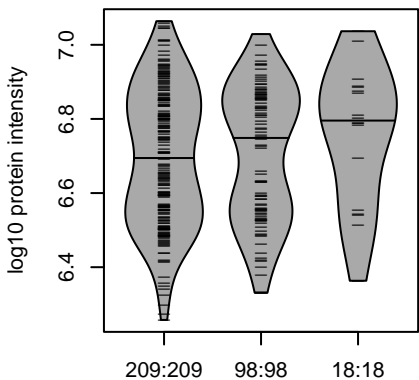

11:57383575:G:T\_T  
p = 0.64, beta = 0.0432, N = 325

**DFTCVHQALK pc2**

**V2X2;A0A7I2V4I9;A0A7I2V5R3;E9PGN7;H9KV48;P05155-V2X2;A0A7I2V2D2;E9PGN7;H9KV48;P05155-D9;A0A7I2V2D2;E9PGN7;P05155-3;P**

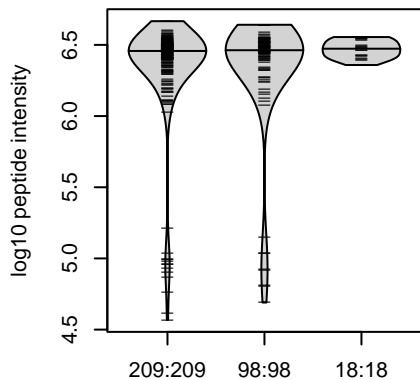

11:57383575:G:T\_T  
p = 0.56, beta = 0.0538, N = 325

**FQPTLLTLPR pc2**

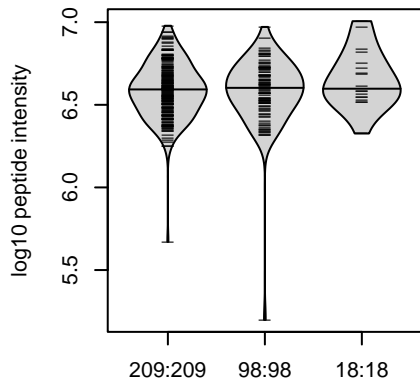

11:57383575:G:T\_T  
p = 0.36, beta = 0.0837, N = 325

**GVTSVSQIFHSPDLAIR pc2**

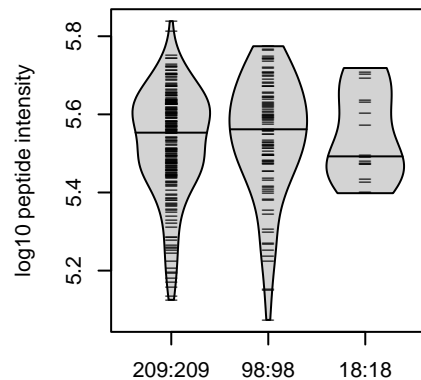

11:57383575:G:T\_T  
p = 0.28, beta = 0.1, N = 325

**HRLEDMEQALSPSVFK pc2**

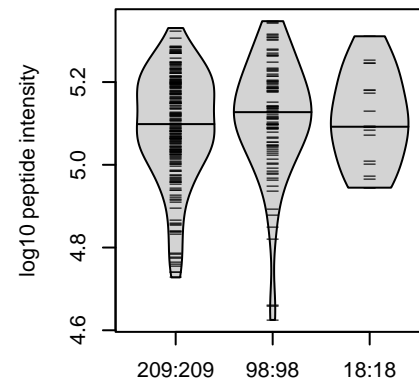

11:57383575:G:T\_T  
p = 0.24, beta = 0.107, N = 325

**TLLVFEVQQPFLFMLWDQQHK pc3**  
**rs4926 ALT**

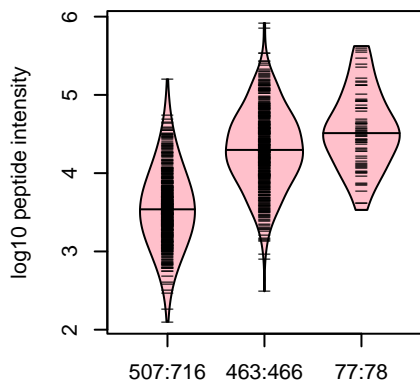

11:57383575:G:T\_T  
p = 9.5e-52, model = REC, N = 1047

**TLLVFEVQQPFLFVLWDQQHK pc3**  
**rs4926 REF**

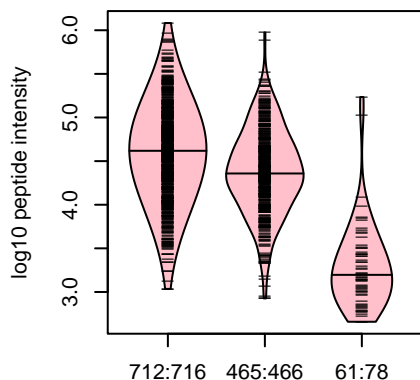

11:57383575:G:T\_T  
p = 1e-17, model = DOM, N = 1238

**TLLVFEVQQPFLFVLWDQQHK pc4**  
**rs4926 REF**

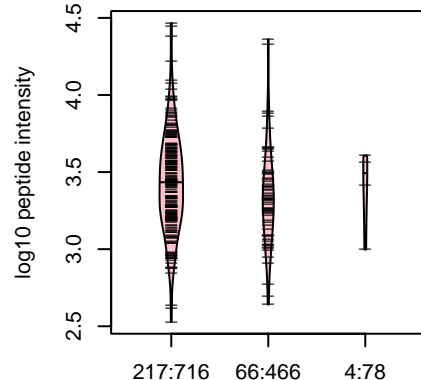

11:57383575:G:T\_T  
p = 8.9e-14, model = REC, N = 287

**TLLVFEVQQPFLFMLWDQQHKFPVFMG**  
**rs4926 ALT**

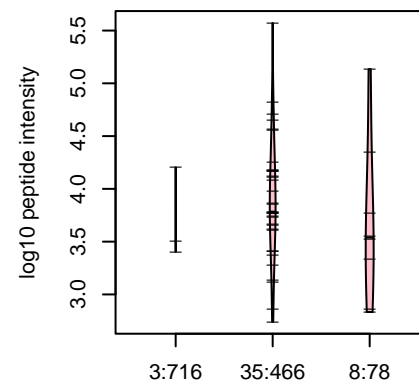

11:57383575:G:T\_T  
p = 2.5e-13, model = REC, N = 46

Assay Target: SERPING1  
Olink UniProt: P05155  
deCODE rsID: rs11606706  
Proxy rsID: rs11606706  
deCODE: 11:57616102:T:G  
Proxy SNP: 11:57383575:G:T  
deCODE log10(p): 1192.2  
deCODE BETA: -0.68  
-----  
1259:1259:1259:1259:1258:125





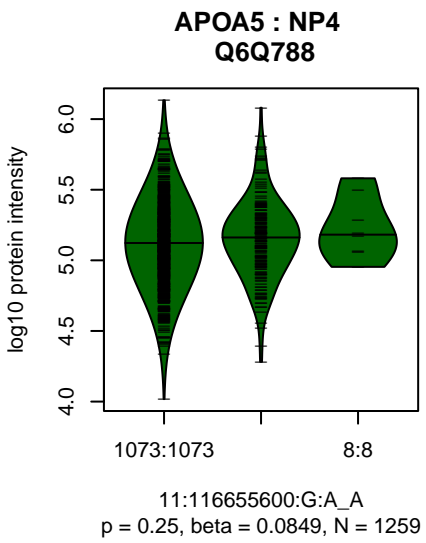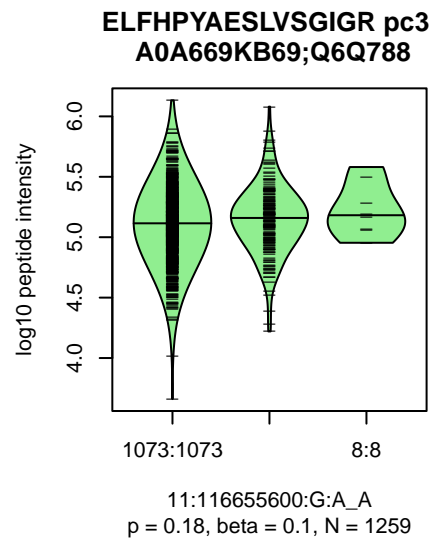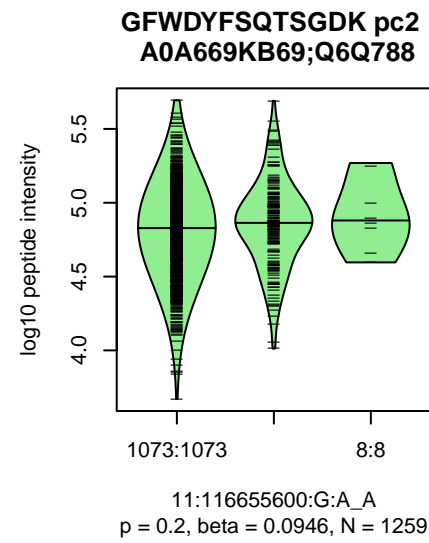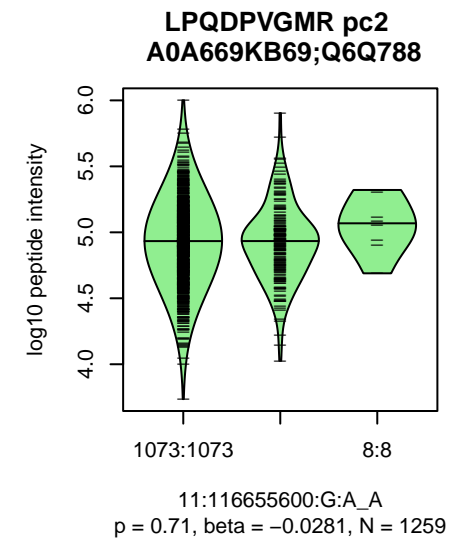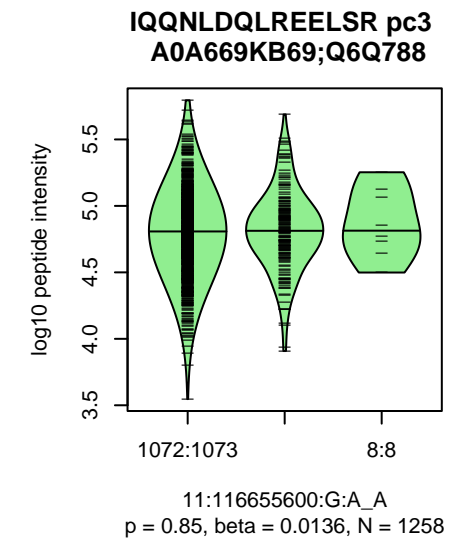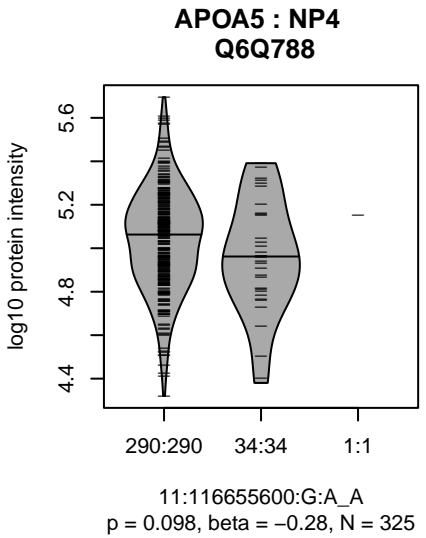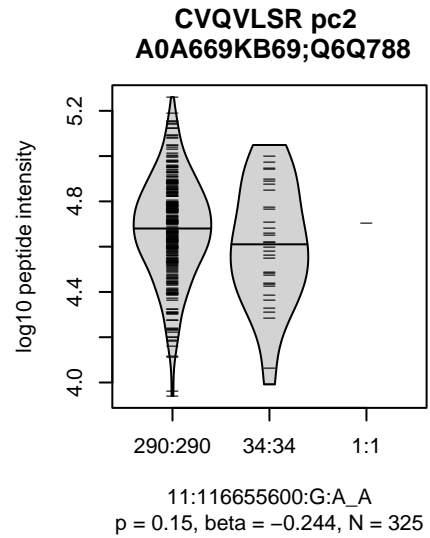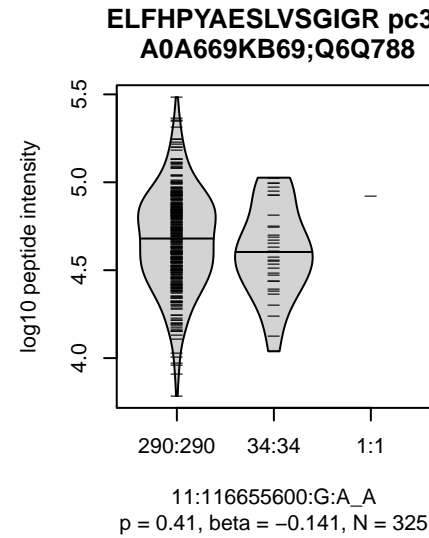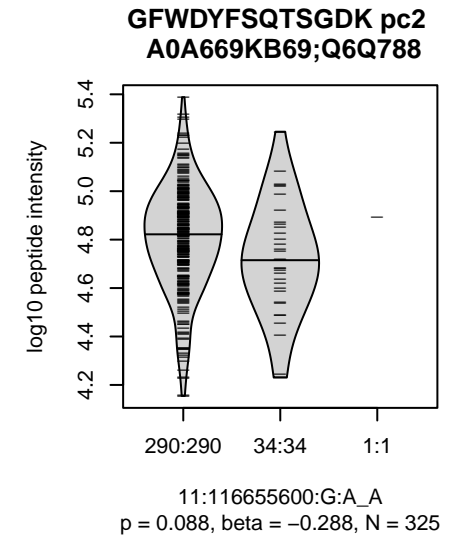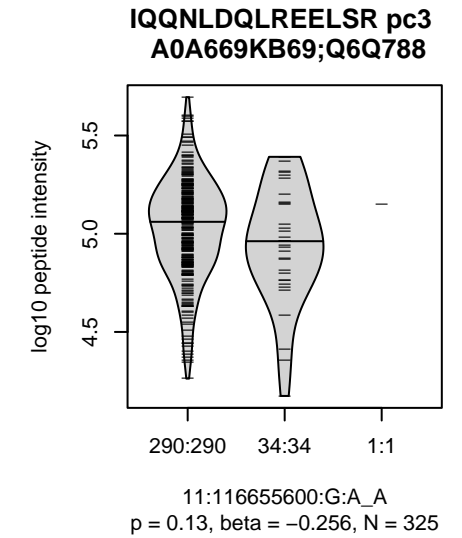

Assay Target: APOA5  
 Olink UniProt: Q6Q788  
 deCODE rsID: rs35120633  
 Proxy rsID: rs35120633  
 deCODE: 11:116784884:A:G  
 Proxy SNP: 11:116655600:G:A  
 deCODE log10(p): 1180.2  
 deCODE BETA: 1.26  
 -----  
 1259:1259:1259:1258:1258:125



**PCYOX1 : NP4  
Q9UHG3**

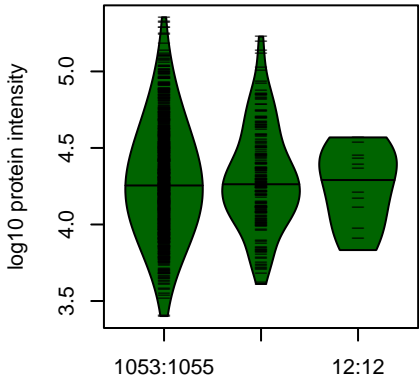

2:70488470:C:T\_T  
p = 0.48, beta = 0.0498, N = 1258

**FLNEMIAPVMR pc2  
F8W8W4;Q9UHG3**

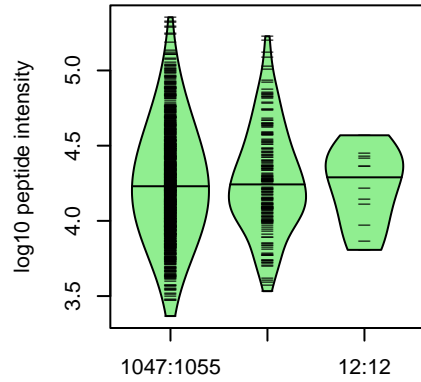

2:70488470:C:T\_T  
p = 0.39, beta = 0.0598, N = 1251

**LFLSYDYAVK pc2  
Q9UHG3**

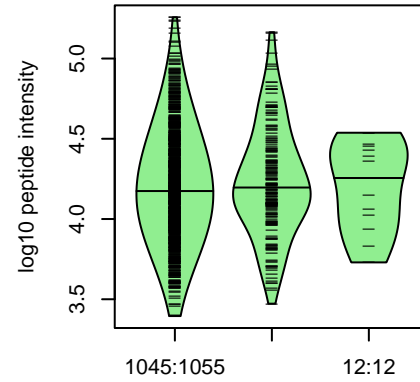

2:70488470:C:T\_T  
p = 0.25, beta = 0.0806, N = 1250

**SNLISGSVMYIEEK pc2  
F8W8W4;Q9UHG3**

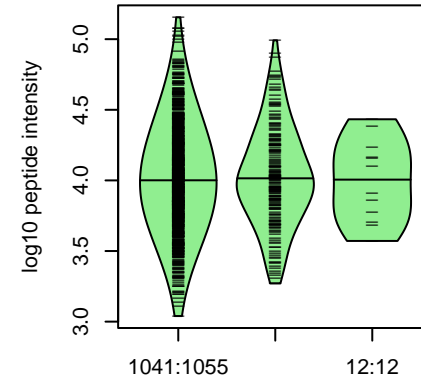

2:70488470:C:T\_T  
p = 0.62, beta = 0.0345, N = 1245

**MYEVVYQIGTETR pc2  
Q9UHG3**

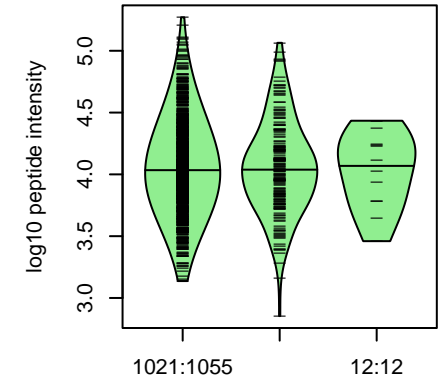

2:70488470:C:T\_T  
p = 0.93, beta = 0.00613, N = 1220

**PCYOX1 : NP4  
Q9UHG3**

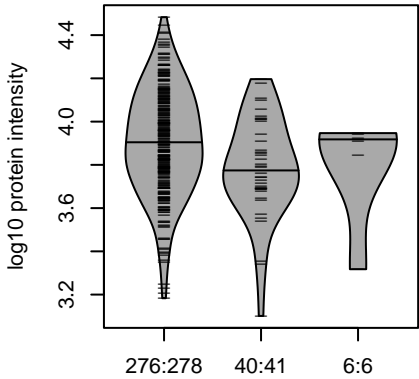

2:70488470:C:T\_T  
p = 0.0023, beta = -0.401, N = 322

**FLNEMIAPVMR pc2  
F8W8W4;Q9UHG3**

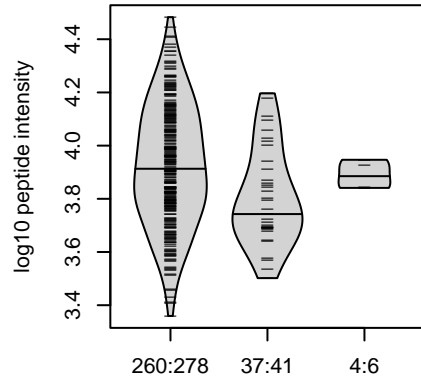

2:70488470:C:T\_T  
p = 0.0013, beta = -0.464, N = 301

**LVCSGLLQASK pc2  
F8W8W4;Q9UHG3**

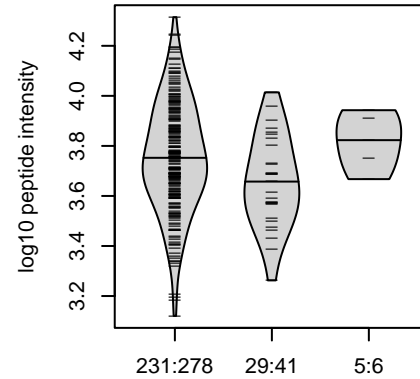

2:70488470:C:T\_T  
p = 0.13, beta = -0.224, N = 265

**SDFYDIVLVATPLNR pc2  
Q9UHG3**

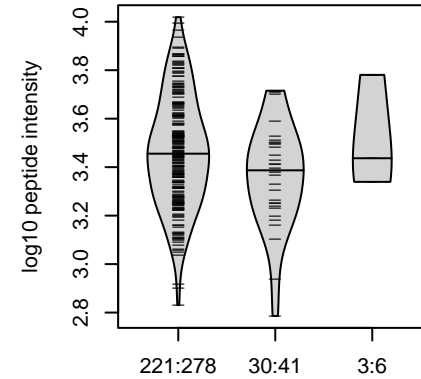

2:70488470:C:T\_T  
p = 0.067, beta = -0.297, N = 254

**MYEVVYQIGTETR pc2  
Q9UHG3**

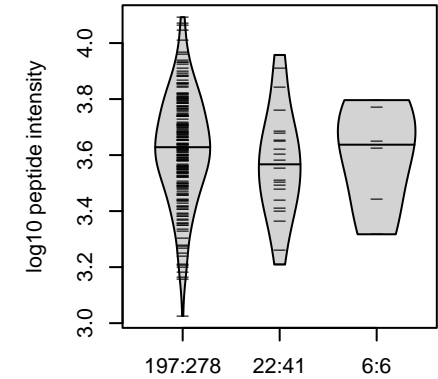

2:70488470:C:T\_T  
p = 0.25, beta = -0.177, N = 225

Assay Target: PCYOX1  
Olink UniProt: Q9UHG3  
deCODE rsID: rs2706762  
Proxy rsID: rs2706762  
deCODE: 2:70261338:T:C  
Proxy SNP: 2:70488470:C:T  
deCODE log10(p): 1115.1  
deCODE BETA: -0.82  
-----  
1251:1250:1245:1220:1148:114

**KLK10 : NP3**  
**O43240**

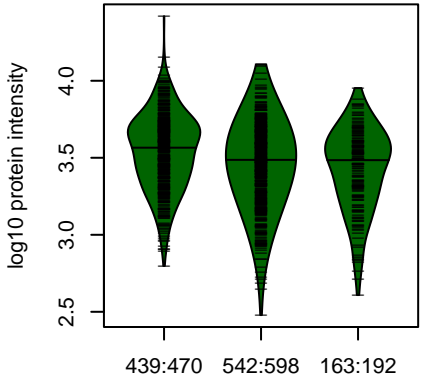

19:51523203:T:C\_T  
p = 6.1e-07, beta = -0.213, N = 1144

**GLTCSSITILSPK pc2**  
**O43240**

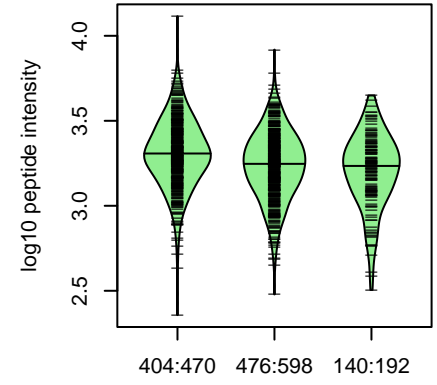

19:51523203:T:C\_T  
p = 2.3e-07, beta = -0.235, N = 1020

**ALQLPYR pc2**  
**O43240**

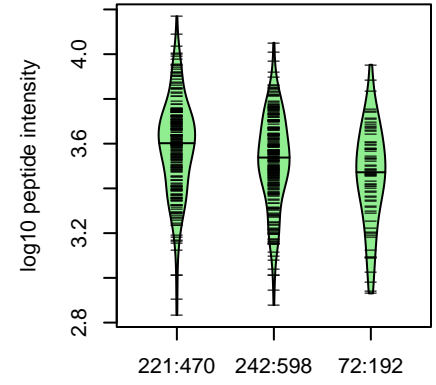

19:51523203:T:C\_T  
p = 1.2e-05, beta = -0.272, N = 535

**RTDEHDLMLLK pc3**  
**O43240**

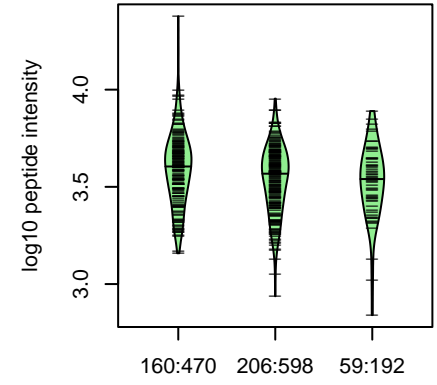

19:51523203:T:C\_T  
p = 0.005, beta = -0.198, N = 425

**YHQGSGPILPR pc2**  
**O43240**

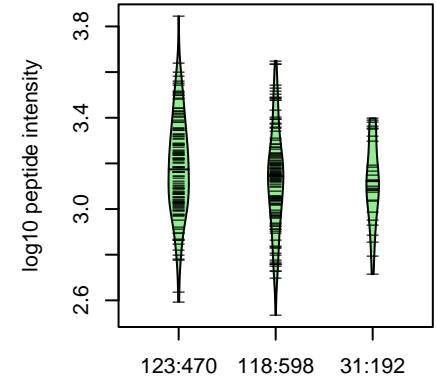

19:51523203:T:C\_T  
p = 0.059, beta = -0.168, N = 272

**LDPEAYGAPCAR pc2**  
**rs3745535 ALT**

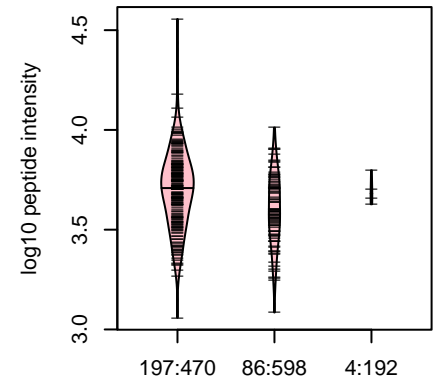

19:51523203:T:C\_T  
p = 6.1e-35, model = REC, N = 287

Assay Target: KLK10  
Olink UniProt: O43240  
deCODE rsID: rs2569454  
Proxy rsID: rs2569454  
deCODE: 19:51019947:T:C  
Proxy SNP: 19:51523203:T:C  
deCODE log10(p): 1063.6  
deCODE BETA: -0.61  
\*.\*.\*.-.-.-:NA:NA  
1020:535:425:272:248:86:76:5:4



**SPARCL1 : NP2  
Q14515**

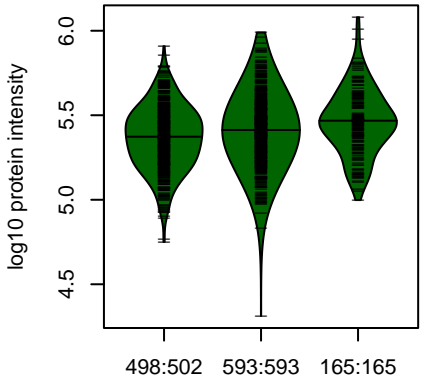

4:88462729:G:A\_A  
p = 5.6e-08, beta = 0.224, N = 1256

**AQSIAYHLK pc2  
Q14515;Q14515-2**

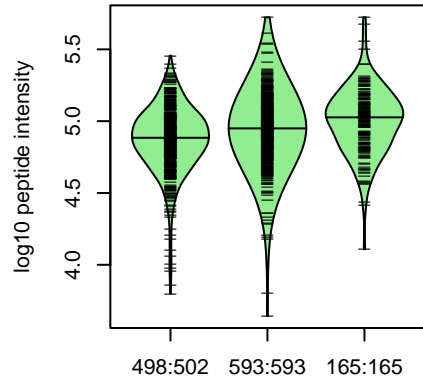

4:88462729:G:A\_A  
p = 8.8e-11, beta = 0.267, N = 1256

**ASLVPMEHCITR pc3  
Q14515;Q14515-2**

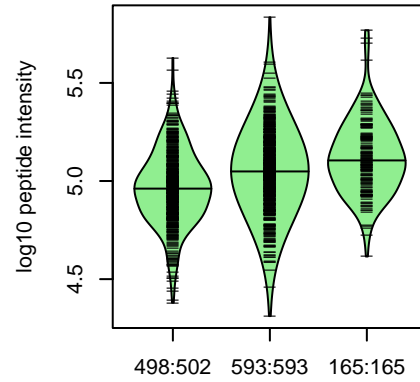

4:88462729:G:A\_A  
p = 3.2e-21, beta = 0.386, N = 1256

**GHQLQLDYFGACK pc3  
Q14515;Q14515-2**

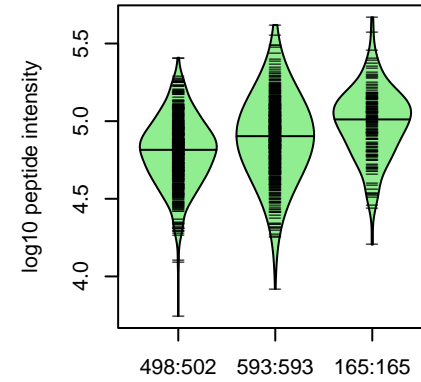

4:88462729:G:A\_A  
p = 1.1e-19, beta = 0.371, N = 1256

**LLAGDHPIDLLLR pc3  
Q14515;Q14515-2**

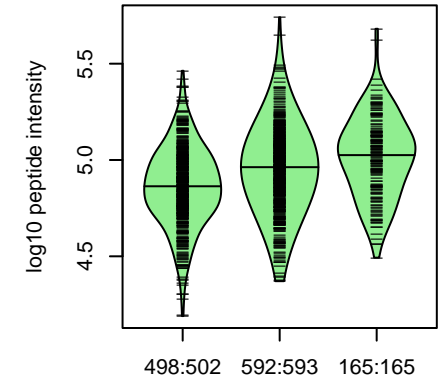

4:88462729:G:A\_A  
p = 8.2e-18, beta = 0.352, N = 1255

**SPARCL1 : NP2  
Q14515**

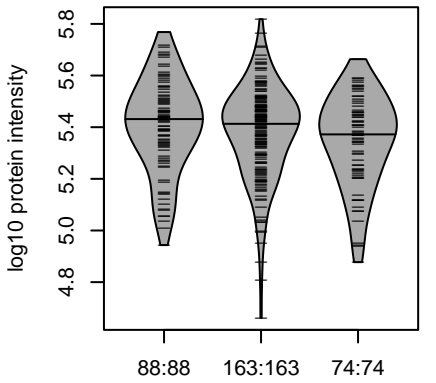

4:88462729:G:A\_G  
p = 0.0021, beta = -0.238, N = 325

**AQSIAYHLK pc2  
Q14515;Q14515-2**

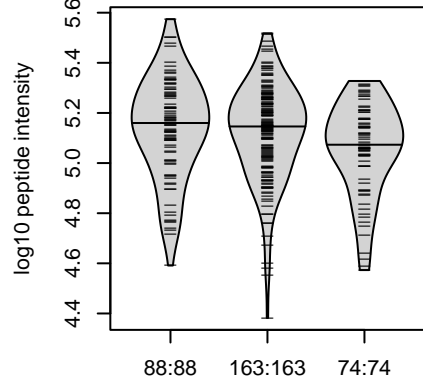

4:88462729:G:A\_G  
p = 0.00024, beta = -0.283, N = 325

**ASLVPMEHCITR pc2  
Q14515;Q14515-2**

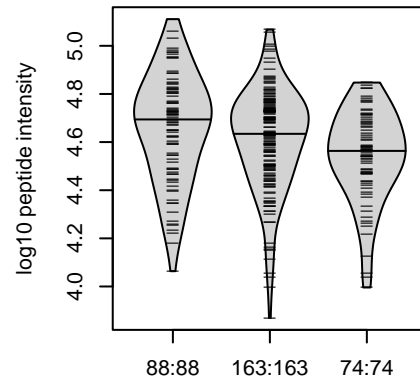

4:88462729:G:A\_G  
p = 1.2e-06, beta = -0.372, N = 325

**EDMSEPQEK pc2  
Q14515**

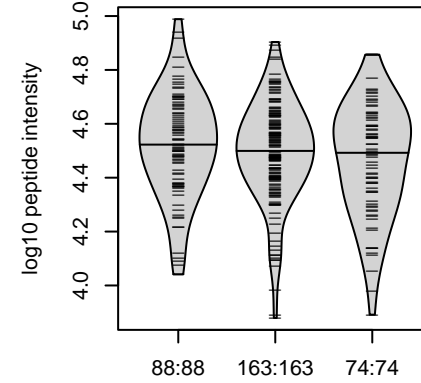

4:88462729:G:A\_G  
p = 0.011, beta = -0.198, N = 325

**FFEECDPNK pc2  
Q14515;Q14515-2**

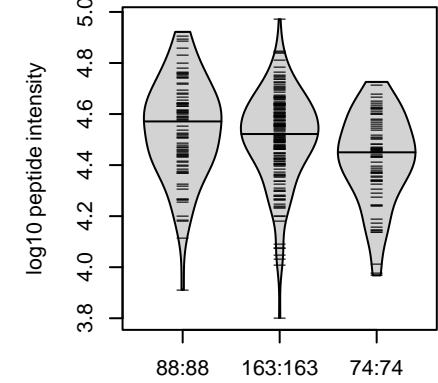

4:88462729:G:A\_G  
p = 9.7e-07, beta = -0.374, N = 325

**KAENSSNEEETSSEGNMR pc3  
rs1130643 REF**

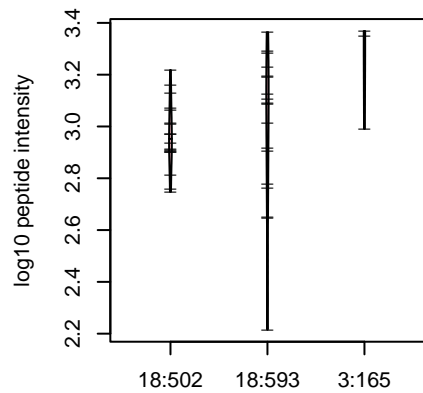

4:88462729:G:A\_A  
p = 0.41, model = REC, N = 39

Assay Target: SPARCL1  
Olink UniProt: Q14515  
deCODE rsID: rs7681694  
Proxy rsID: rs7681694  
deCODE: 4:87541577:A:G  
Proxy SNP: 4:88462729:G:A  
deCODE log10(p): 1030.5  
deCODE BETA: 0.55  
\*\*\*\*\*  
1256:1256:1256:1255:1255:125

**ADAMTS13 : NP4**  
**Q76LX8**

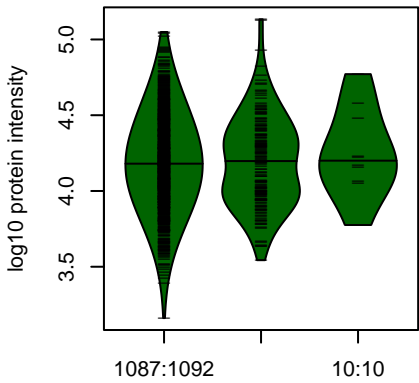

9:136305530:C:G\_G  
p = 0.77, beta = 0.0222, N = 1255

**LLVPLLDGTECGVEK pc2**  
**E7EV88;Q76LX8;Q76LX8-2;Q76LX8**

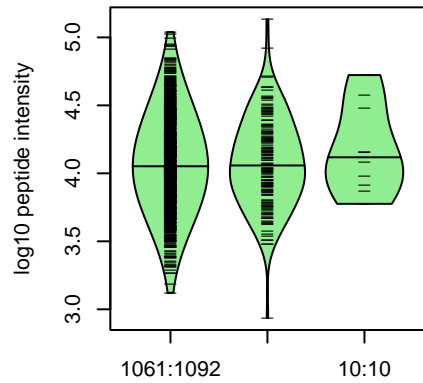

9:136305530:C:G\_G  
p = 0.54, beta = 0.047, N = 1224

**EVCQAVPCPAR pc2**  
**Q76LX8;Q76LX8-2;Q76LX8-3**

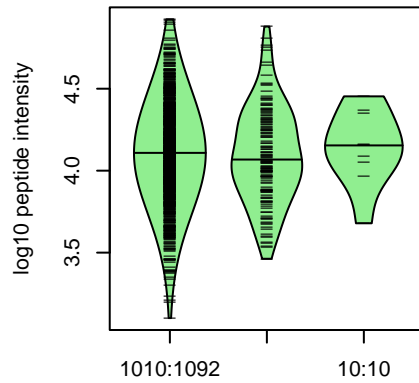

9:136305530:C:G\_G  
p = 0.81, beta = -0.0191, N = 1164

**QAWVWAAVR pc2**  
**Q76LX8;Q76LX8-2;Q76LX8-3**

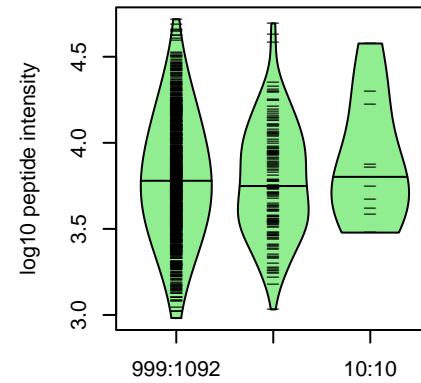

9:136305530:C:G\_G  
p = 0.92, beta = 0.0079, N = 1153

**TNTLVVR pc2**  
**10A0C4DFV8;Q76LX8;Q76LX8-2;Q76LX8-3**

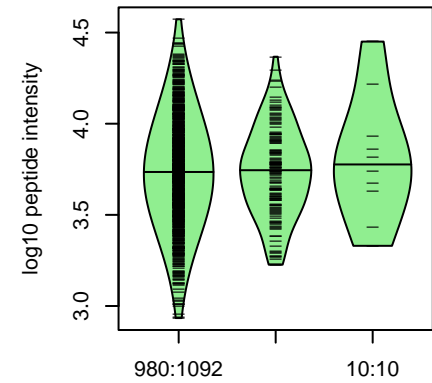

9:136305530:C:G\_G  
p = 0.43, beta = 0.0617, N = 1135

**ADAMTS13 : NP4**  
**Q76LX8;Q76LX8-2;Q76LX8-3**

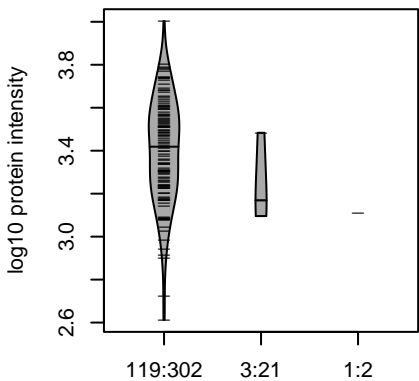

9:136305530:C:G\_G  
p = 0.19, beta = -0.487, N = 123

**SLVELTPIAAVHGR pc2**  
**E7EV88;Q76LX8;Q76LX8-2;Q76LX8**

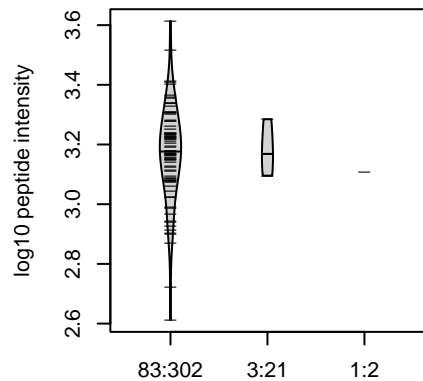

9:136305530:C:G\_G  
p = 0.84, beta = 0.0745, N = 87

**LLVPLLDGTECGVEK pc2**  
**E7EV88;Q76LX8;Q76LX8-2;Q76LX8**

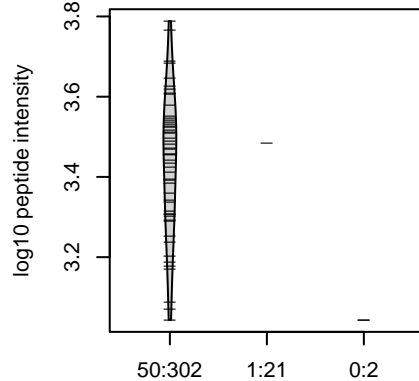

9:136305530:C:G\_G  
p = 0.28, beta = 1.04, N = 51

**TQLEFMSEQCAR pc2**  
**rs2301612 ALT**

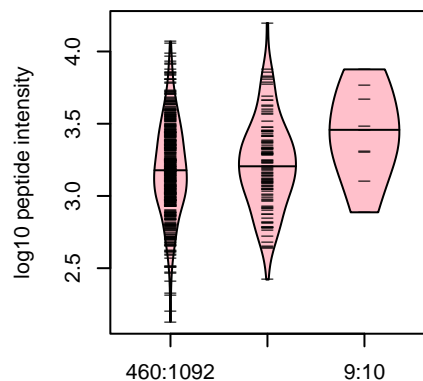

9:136305530:C:G\_G  
p = 4.8e-15, model = REC, N = 585

**TQLEFMSQQCAR pc2**  
**rs2301612 REF**

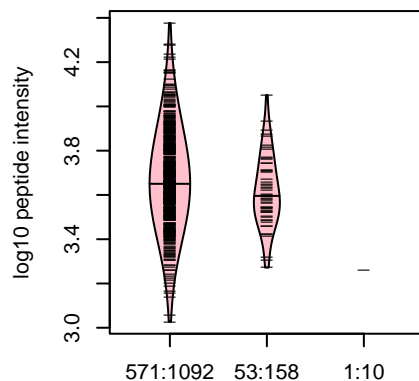

9:136305530:C:G\_G  
p = 1.3e-06, model = REC, N = 625

Assay Target: ADAMTS13  
Olink UniProt: Q76LX8  
deCODE rsID: rs28647808  
Proxy rsID: rs28647808  
deCODE: 9:133440409:G:C  
Proxy SNP: 9:136305530:C:G  
deCODE log10(p): 1028.5  
deCODE BETA: -0.88  
-----  
1224:1164:1153:1135:1130:112





**CCL18 : NP4  
P55774**

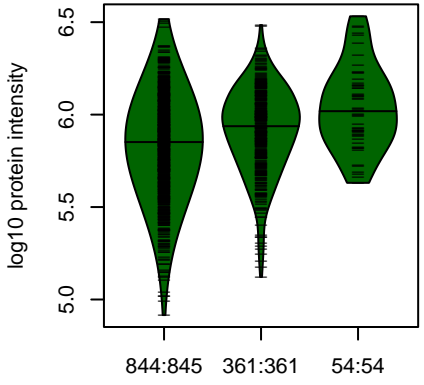

17:34391617:A:G\_G  
p = 2.3e-11, beta = 0.329, N = 1259

**FIVDYSETSPQCPK pc2  
P55774**

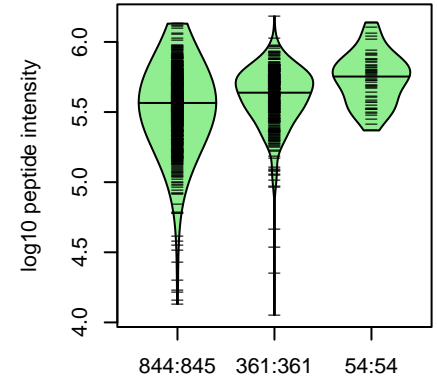

17:34391617:A:G\_G  
p = 1.1e-11, beta = 0.334, N = 1259

**PGVILLTK pc2  
P55774**

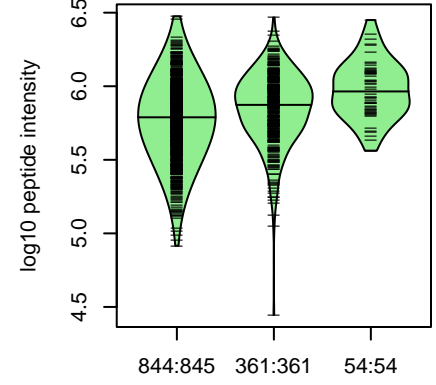

17:34391617:A:G\_G  
p = 6.4e-13, beta = 0.353, N = 1259

**ELCCLVYTSWQIPQK pc2  
P55774**

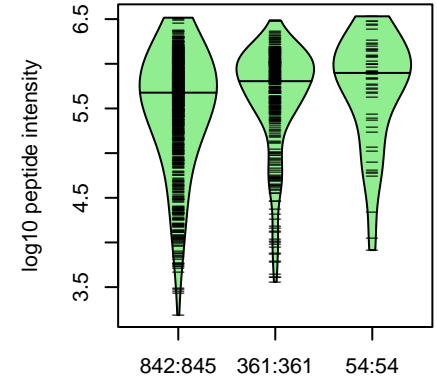

17:34391617:A:G\_G  
p = 5e-05, beta = 0.201, N = 1257

**QICADPNKK pc2  
P55774**

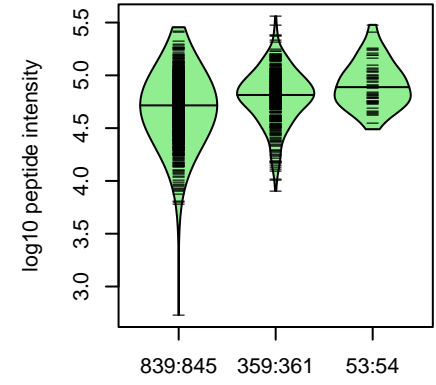

17:34391617:A:G\_G  
p = 6.9e-14, beta = 0.37, N = 1251

**CCL18 : NP4  
P55774**

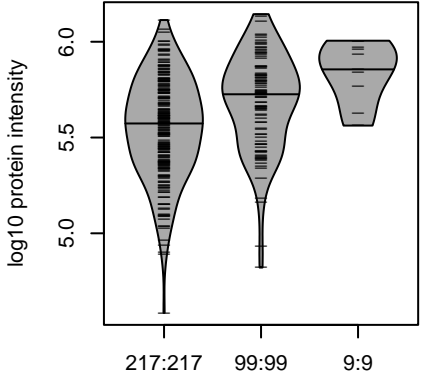

17:34391617:A:G\_G  
p = 4.8e-08, beta = 0.547, N = 325

**ELCCLVYTSWQIPQK pc3  
P55774**

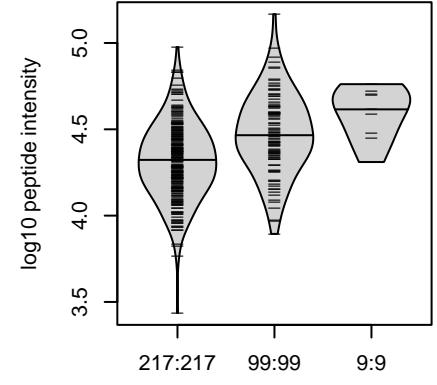

17:34391617:A:G\_G  
p = 3.7e-11, beta = 0.656, N = 325

**PGVILLTK pc2  
P55774**

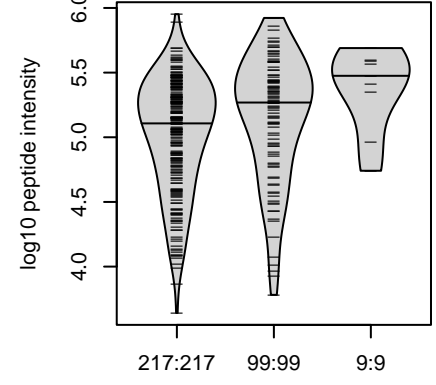

17:34391617:A:G\_G  
p = 3.2e-05, beta = 0.421, N = 325

**FIVDYSETSPQCPK pc2  
P55774**

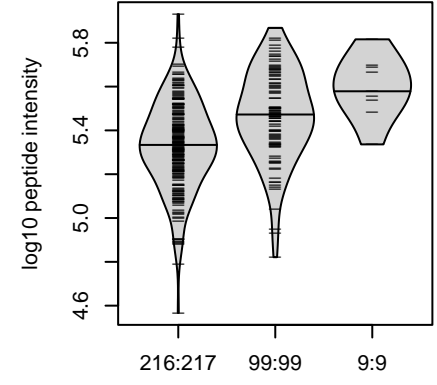

17:34391617:A:G\_G  
p = 7e-12, beta = 0.679, N = 324

**QICADPNK pc2  
P55774**

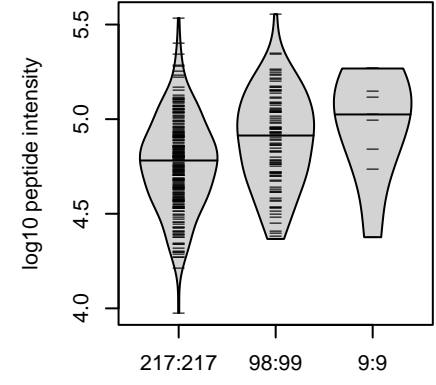

17:34391617:A:G\_G  
p = 1.2e-06, beta = 0.49, N = 324

Assay Target: CCL18  
Olink UniProt: P55774  
deCODE rsID: rs2015086  
Proxy rsID: rs2015086  
deCODE: 17:36064257:G:A  
Proxy SNP: 17:34391617:A:G  
deCODE log10(p): 1016.6  
deCODE BETA: 0.89  
\*.\*.\*.\*.\*.\*.\*.\*  
1259:1259:1257:1257:1251:124









**SFTPD : NP5  
P35247**

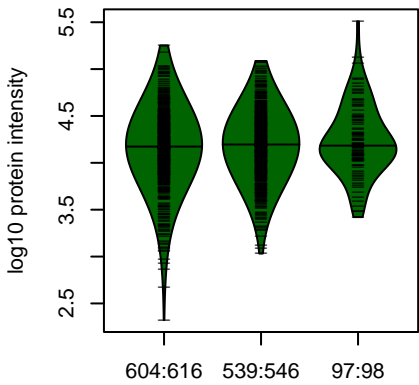

10:81755720:C:A\_A  
p = 0.16, beta = 0.0632, N = 1240

**SAAENAALQLLVAK pc2  
P35247**

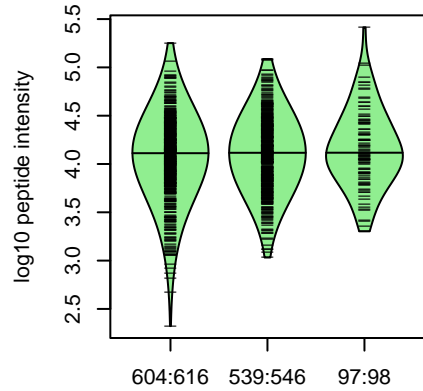

10:81755720:C:A\_A  
p = 0.054, beta = 0.0865, N = 1240

**NEAAFLSMTDSK pc2  
P35247**

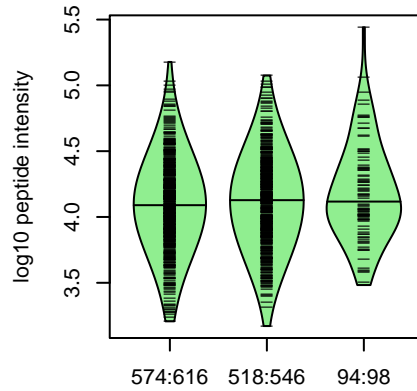

10:81755720:C:A\_A  
p = 0.055, beta = 0.0879, N = 1186

**QGNIGPQ GK pc2  
P35247**

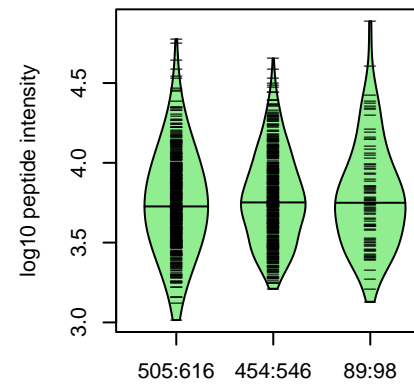

10:81755720:C:A\_A  
p = 0.3, beta = 0.0494, N = 1048

**KVELFPNGQSVGEK pc3  
P35247**

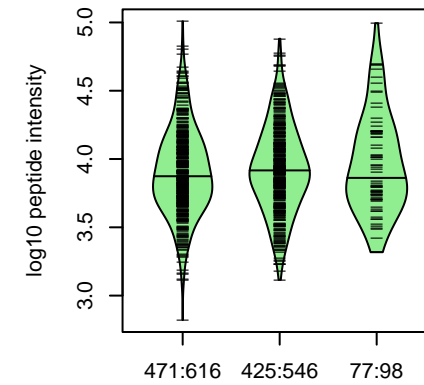

10:81755720:C:A\_A  
p = 0.13, beta = 0.0758, N = 973

**SFTPD : NP5  
P35247**

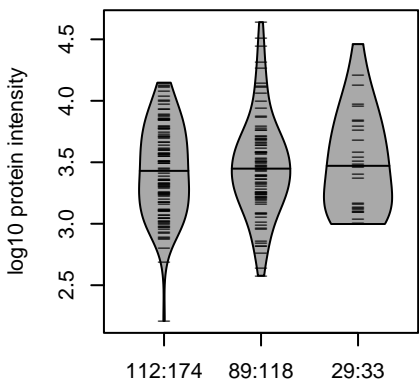

10:81755720:C:A\_A  
p = 0.18, beta = 0.125, N = 230

**SAAENAALQLLVAK pc2  
P35247**

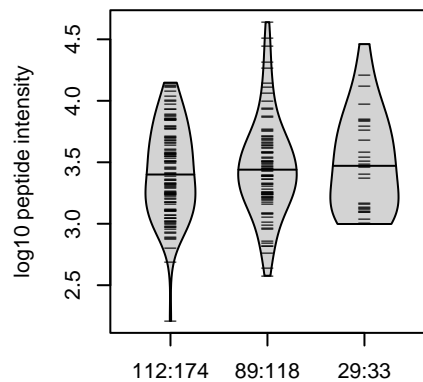

10:81755720:C:A\_A  
p = 0.14, beta = 0.137, N = 230

**NEAAFLSMTDSK pc2  
P35247**

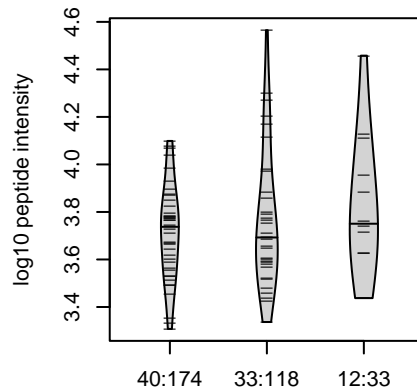

10:81755720:C:A\_A  
p = 0.043, beta = 0.296, N = 85

**PFTEAQLLCTQAGGQLATPR pc3  
rs3088308 ALT**

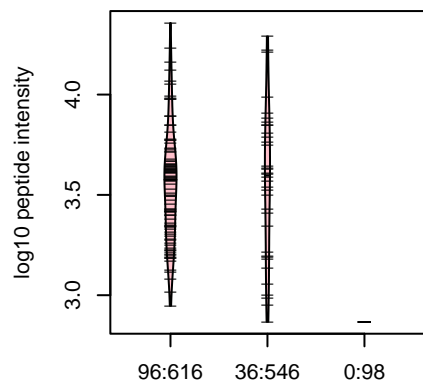

10:81755720:C:A\_A  
p = 6.5e-09, model = REC, N = 132

**PFTEAQLLCTQAGGQLASPR pc3  
rs3088308 REF**

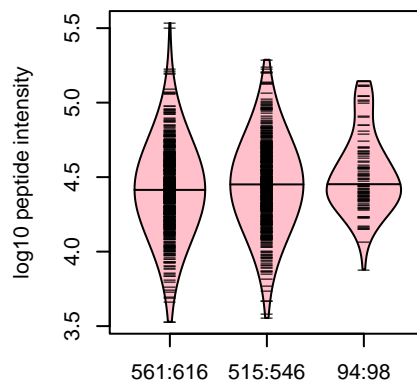

10:81755720:C:A\_A  
p = 0.021, model = REC, N = 1170

Assay Target: SFTPD  
Olink UniProt: P35247  
deCODE rsID: rs12357764  
Proxy rsID: rs12357764  
deCODE: 10:79995964:A:C  
Proxy SNP: 10:81755720:C:A  
deCODE log10(p): 957.5  
deCODE BETA: 0.53  
-----  
1240:1186:1048:973:881:744:33

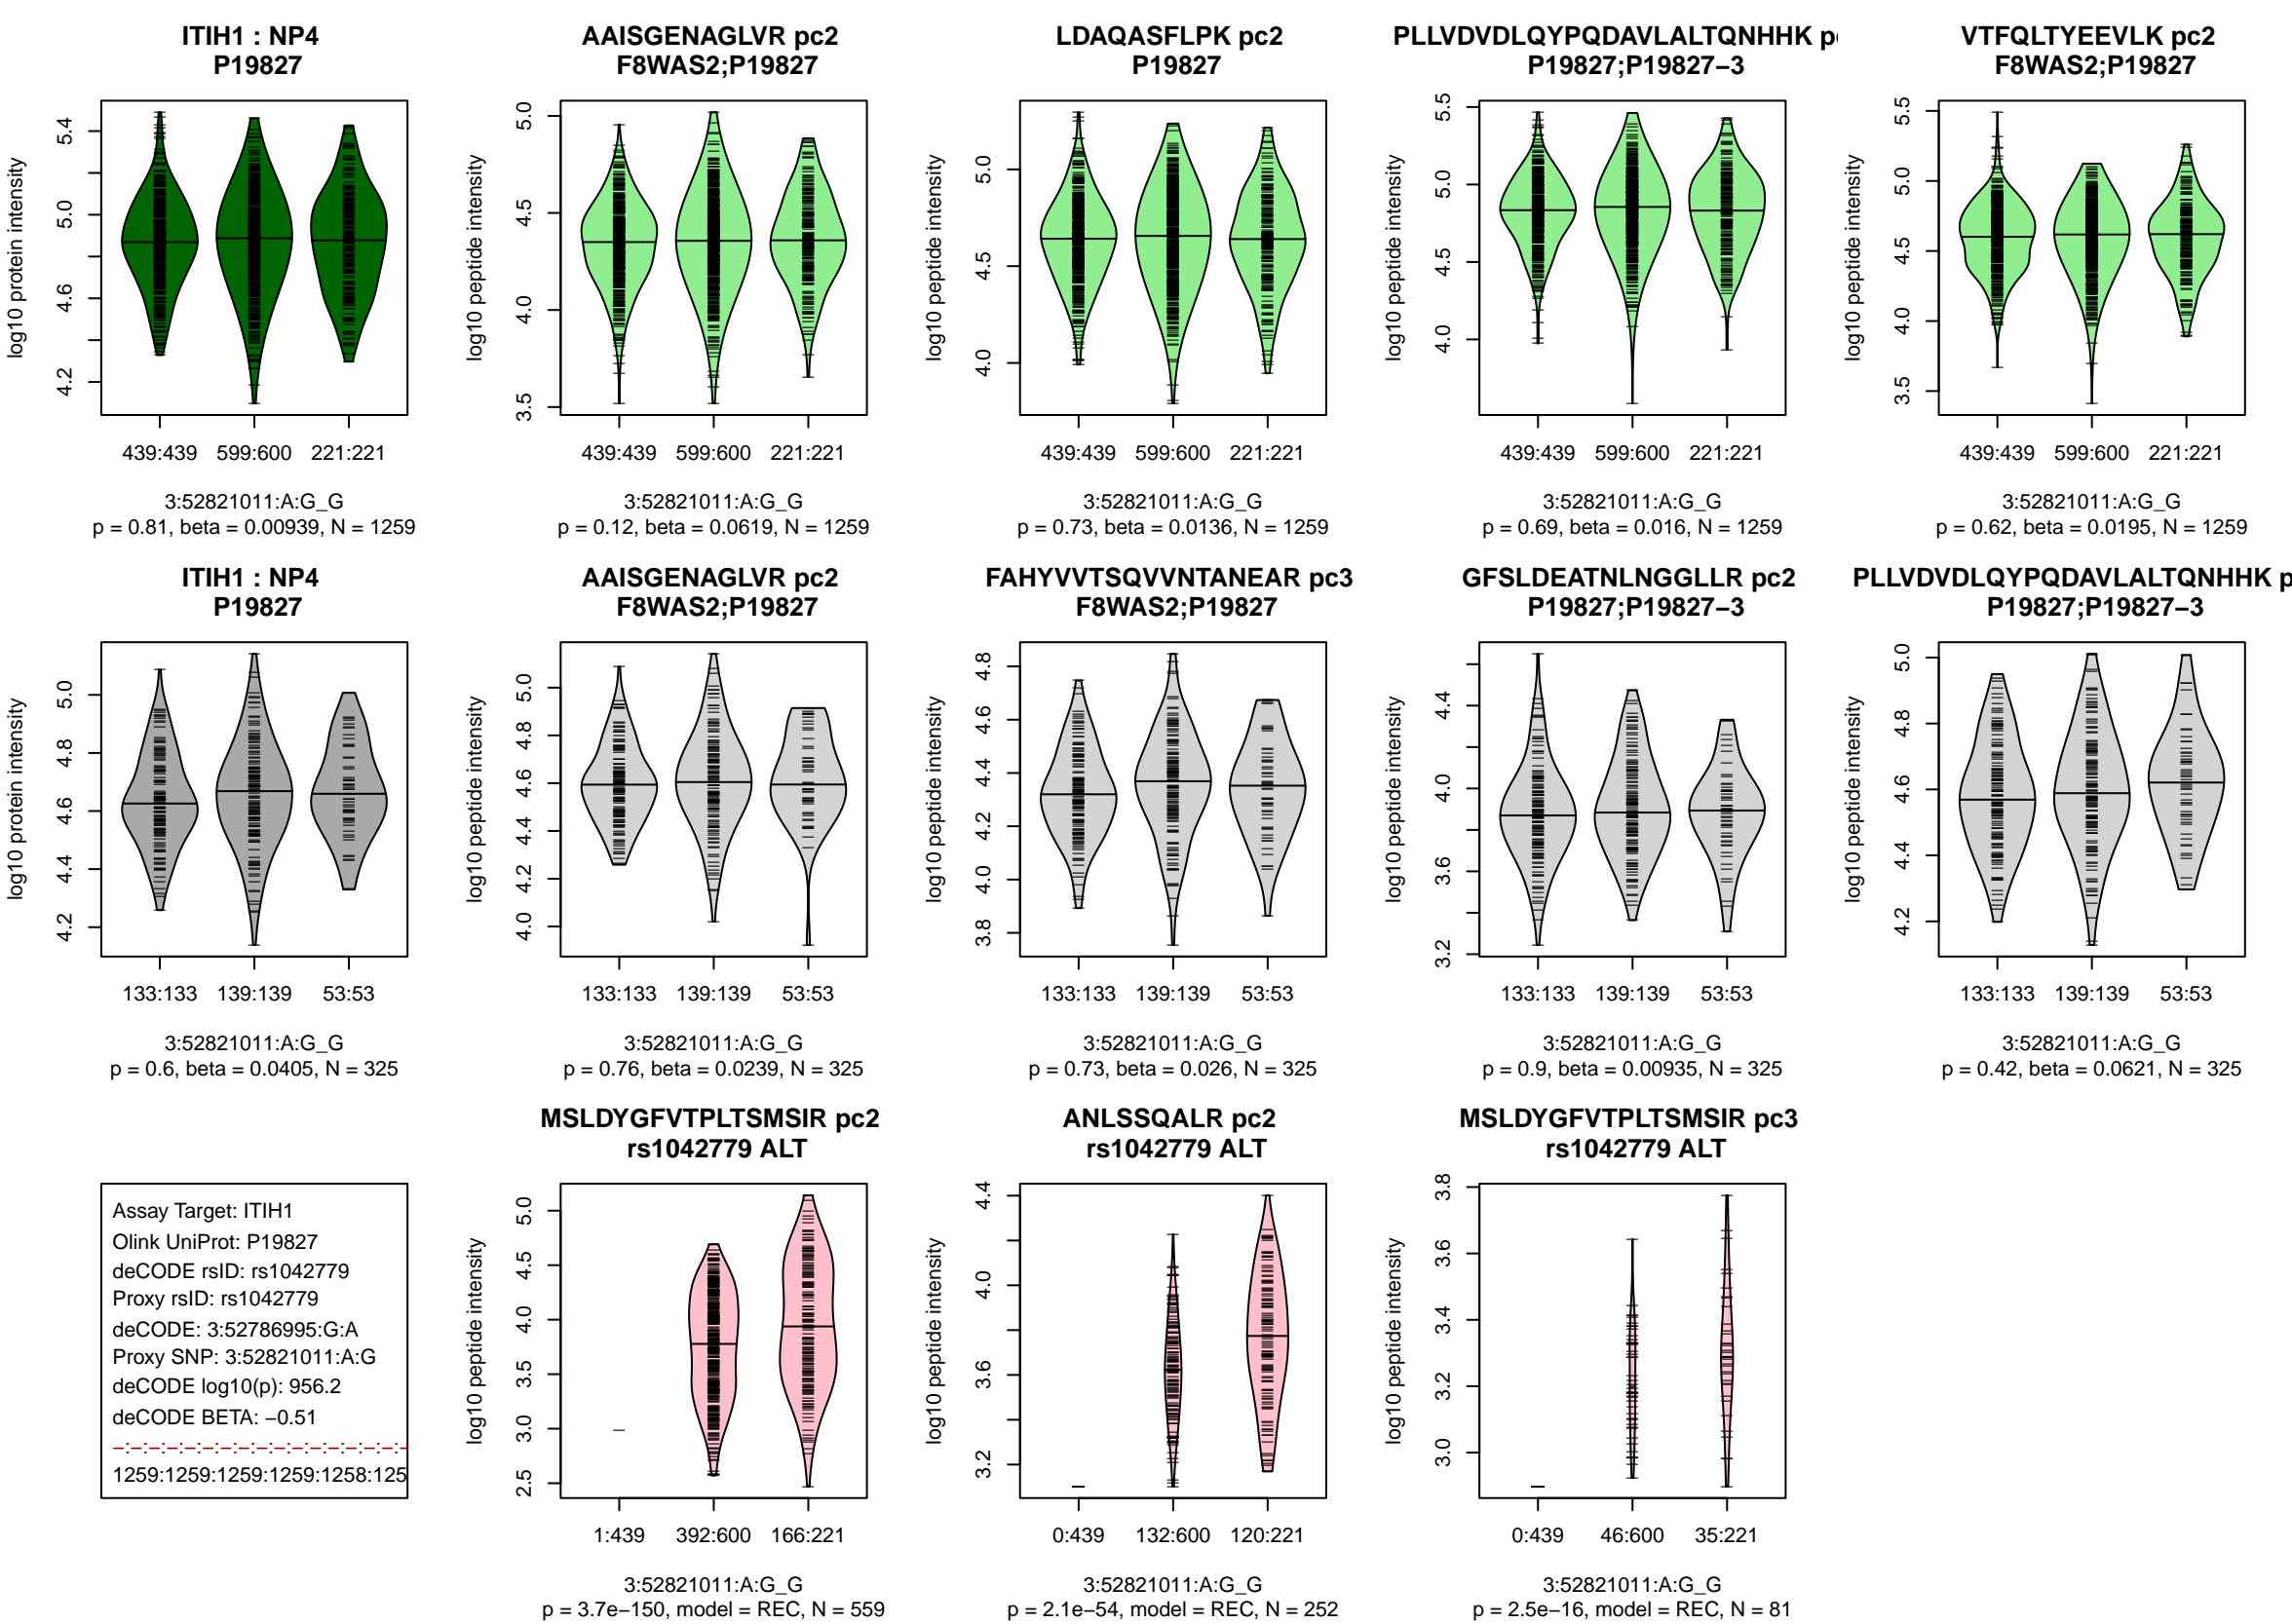





**FGL1 : NP5**  
**Q08830**

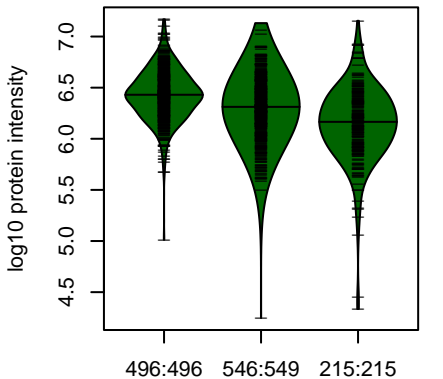

8:17742929:A:G\_A  
p = 6.5e-29, beta = -0.426, N = 1257

**IRPNDFIPNVI pc2**  
**Q08830**

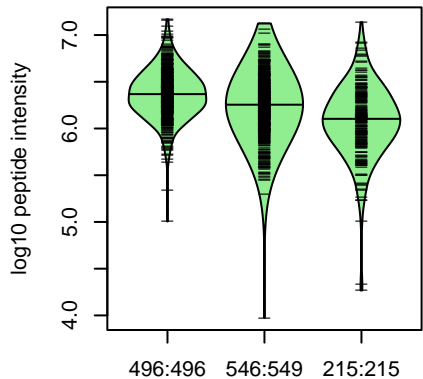

8:17742929:A:G\_A  
p = 9.2e-27, beta = -0.41, N = 1257

**QLLQENEVQFLDK pc2**  
**Q08830**

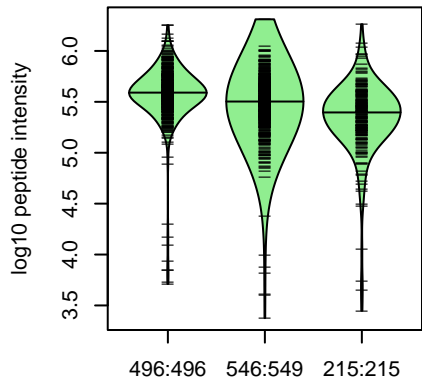

8:17742929:A:G\_A  
p = 6e-24, beta = -0.387, N = 1257

**SDGSENFNR pc2**  
**Q08830**

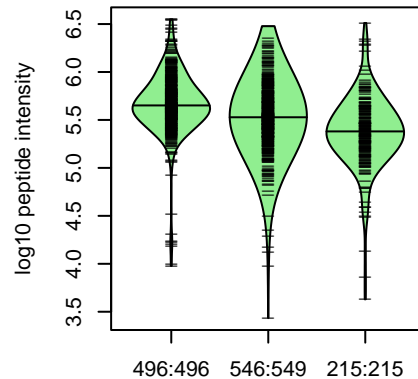

8:17742929:A:G\_A  
p = 7.8e-27, beta = -0.41, N = 1257

**IDLADFEK pc2**  
**Q08830**

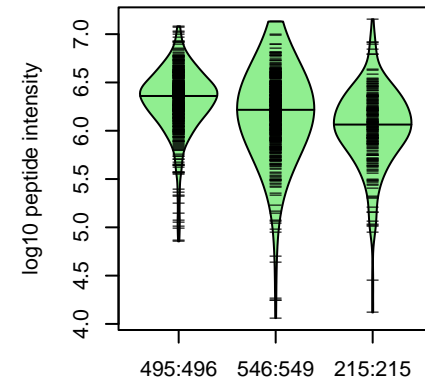

8:17742929:A:G\_A  
p = 2.2e-19, beta = -0.347, N = 1256

**FGL1 : NP5**  
**Q08830**

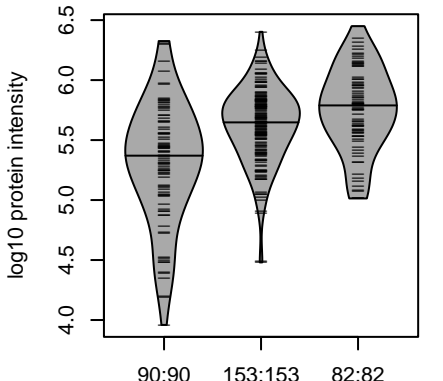

8:17742929:A:G\_G  
p = 4.4e-11, beta = 0.481, N = 325

**IRPNDFIPNVI pc2**  
**Q08830**

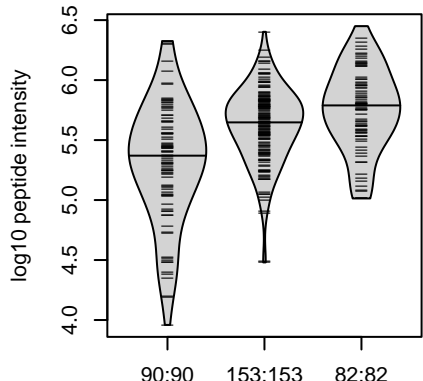

8:17742929:A:G\_G  
p = 4.3e-11, beta = 0.481, N = 325

**NLHFLTQEDYTLK pc3**  
**Q08830**

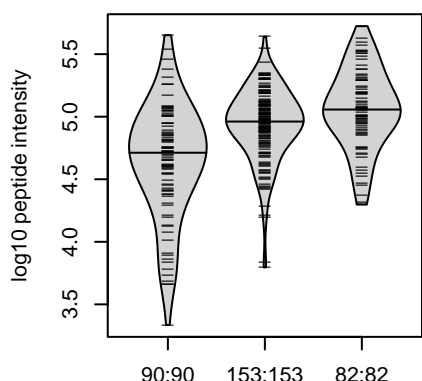

8:17742929:A:G\_G  
p = 9e-12, beta = 0.496, N = 325

**QLLQENEVQFLDK pc2**  
**Q08830**

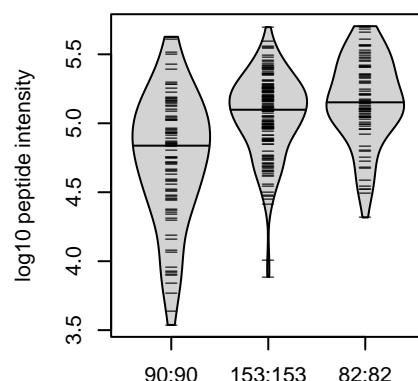

8:17742929:A:G\_G  
p = 1.6e-11, beta = 0.491, N = 325

**DYENGFGNFVQK pc2**  
**Q08830**

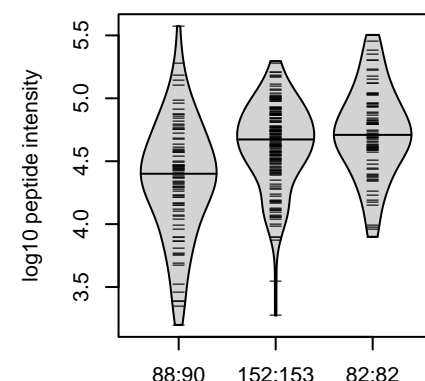

8:17742929:A:G\_G  
p = 2.6e-08, beta = 0.412, N = 322

**GDENTVIDLGSK pc2**  
**rs3739406 REF**

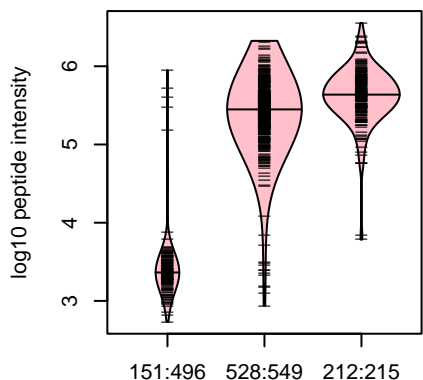

8:17742929:A:G\_A  
p = 8.7e-154, model = REC, N = 891

**GDENTVVDLGSK pc2**  
**rs3739406 ALT**

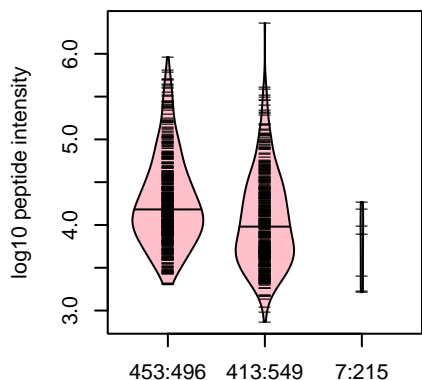

8:17742929:A:G\_A  
p = 1.1e-117, model = DOM, N = 873

**GDENTVIDLGSKR pc2**  
**rs3739406 REF**

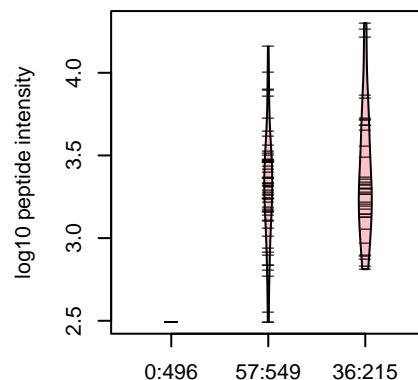

8:17742929:A:G\_A  
p = 1.2e-21, model = REC, N = 93

**GDENTVVDLGSKR pc2**  
**rs3739406 ALT**

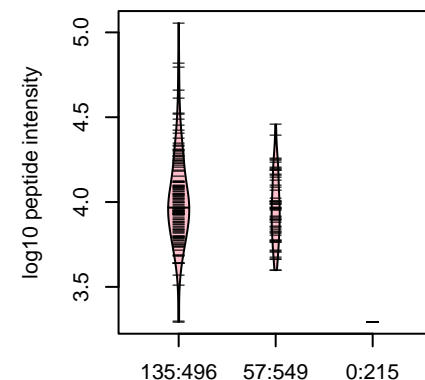

8:17742929:A:G\_A  
p = 4.3e-21, model = REC, N = 192

Assay Target: FGL1  
Olink UniProt: Q08830  
deCODE rsID: rs2073562  
Proxy rsID: rs2073562  
deCODE: 8:17885420:A:G  
Proxy SNP: 8:17742929:A:G  
deCODE log10(p): 891  
deCODE BETA: -0.52  
\*\*\*\*\*:-:NA  
1257:1257:1257:1256:1256:125

**LYZ : NP4  
P61626**

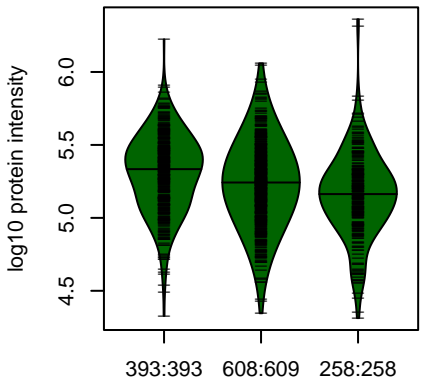

12:69732105:T:C\_C  
p = 2.3e-13, beta = -0.286, N = 1259

**GISLANWMCLAK pc2  
A0A0B4J259;F8VV32;P61626**

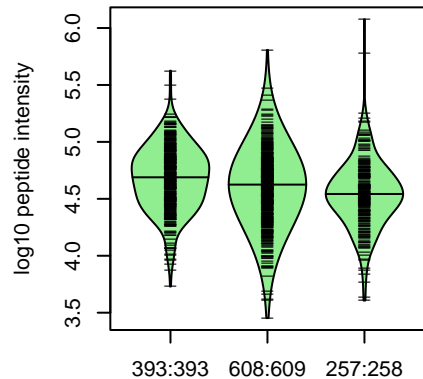

12:69732105:T:C\_C  
p = 3.1e-10, beta = -0.247, N = 1258

**WESGYNTR pc2  
A0A0B4J259;F8VV32;P61626**

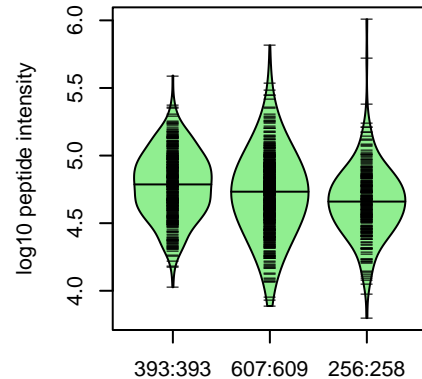

12:69732105:T:C\_C  
p = 4.2e-10, beta = -0.245, N = 1256

**YWCNDGK pc2  
A0A0B4J259;F8VV32;P61626**

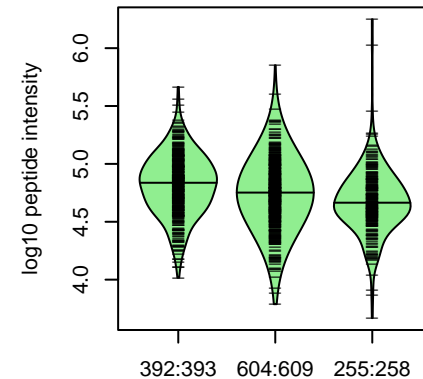

12:69732105:T:C\_C  
p = 7.3e-13, beta = -0.281, N = 1251

**LGMDGYR pc2  
A0A0B4J259;F8VV32;P61626**

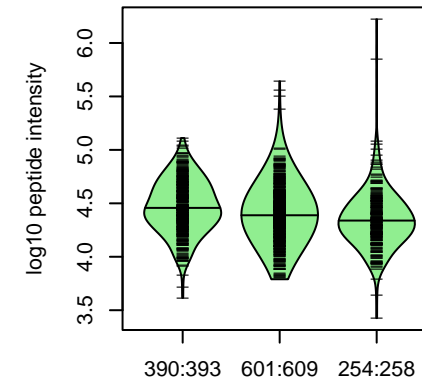

12:69732105:T:C\_C  
p = 3.8e-10, beta = -0.247, N = 1245

**LYZ : NP4  
P61626**

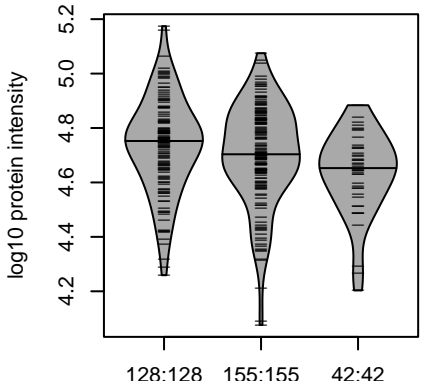

12:69732105:T:C\_C  
p = 0.0063, beta = -0.221, N = 325

**WESGYNTR pc2  
A0A0B4J259;F8VV32;P61626**

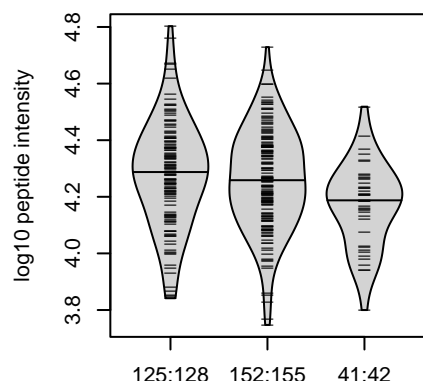

12:69732105:T:C\_C  
p = 0.0053, beta = -0.228, N = 318

**STDYGIFQINSR pc2  
A0A0B4J259;F8VV32;P61626**

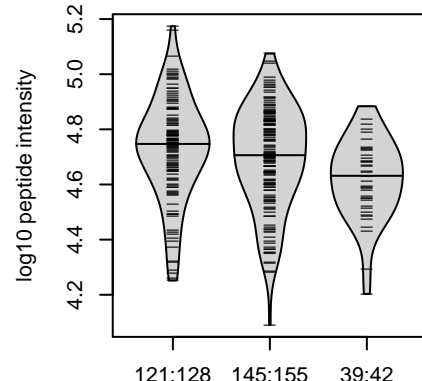

12:69732105:T:C\_C  
p = 0.0068, beta = -0.226, N = 305

**ATNYNAGDR pc2  
A0A0B4J259;F8VV32;P61626**

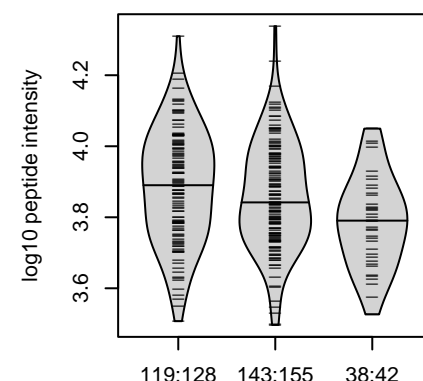

12:69732105:T:C\_C  
p = 0.0017, beta = -0.264, N = 300

**GISLANWMCLAK pc2  
A0A0B4J259;F8VV32;P61626**

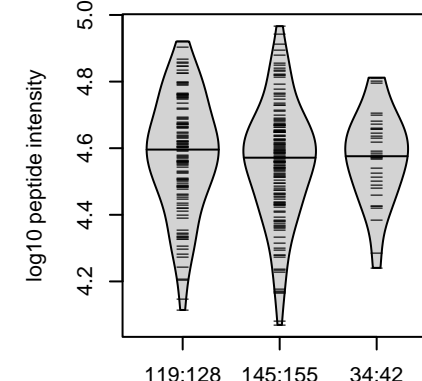

12:69732105:T:C\_C  
p = 0.37, beta = -0.0774, N = 298

Assay Target: LYZ  
Olink UniProt: P61626  
deCODE rsID: rs4761234  
Proxy rsID: rs4761234  
deCODE: 12:69338325:C:T  
Proxy SNP: 12:69732105:T:C  
deCODE log10(p): 861.2  
deCODE BETA: -0.49  
\*:\*:\*:\*:\*:-:-:-:NA  
1258:1256:1251:1245:1244:122

**ITIH2 : NP4  
P19823**

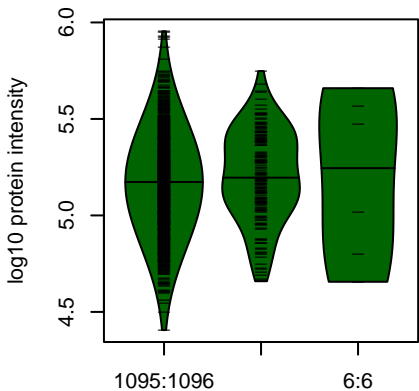

10:7742467:A:G\_G  
p = 0.093, beta = 0.132, N = 1259

**FLHVPDTFEGHFDGVPVISK pc4  
P19823;Q5T985**

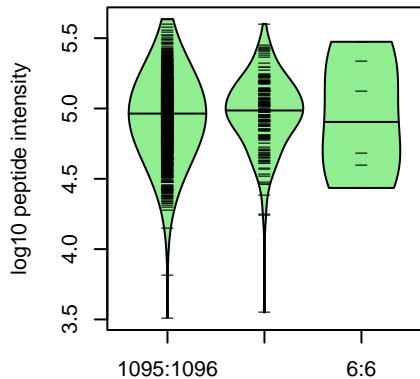

10:7742467:A:G\_G  
p = 0.3, beta = 0.081, N = 1259

**FYNQVSTPLLR pc2  
P19823;Q5T985**

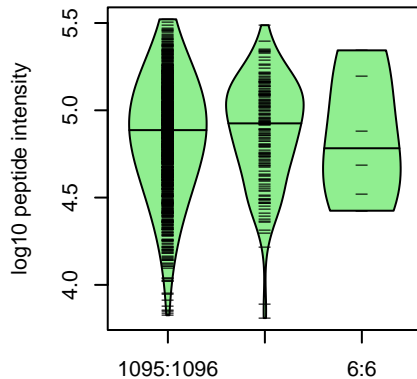

10:7742467:A:G\_G  
p = 0.31, beta = 0.0798, N = 1259

**IYGNQDTSSQLK pc2  
P19823;Q5T985**

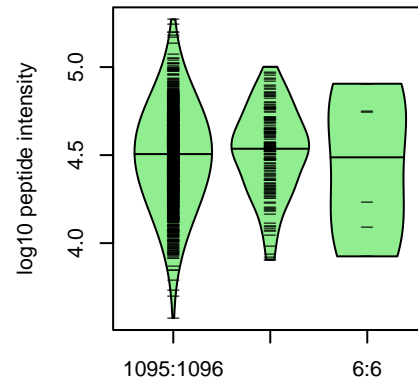

10:7742467:A:G\_G  
p = 0.28, beta = 0.0861, N = 1259

**MATTMIQSK pc2  
P19823;Q5T985**

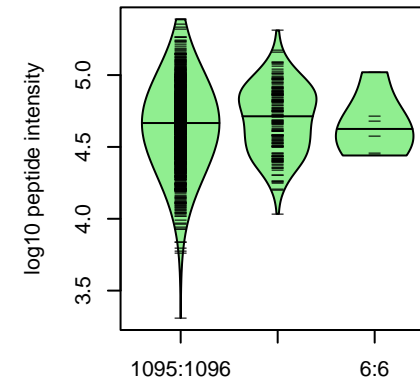

10:7742467:A:G\_G  
p = 0.063, beta = 0.147, N = 1259

**ITIH2 : NP4  
P19823**

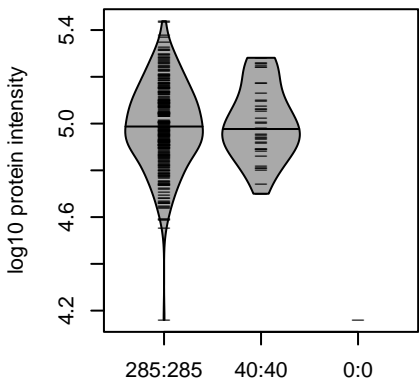

10:7742467:A:G\_G  
p = 0.85, beta = 0.0322, N = 325

**FYNQVSTPLLR pc2  
P19823;Q5T985**

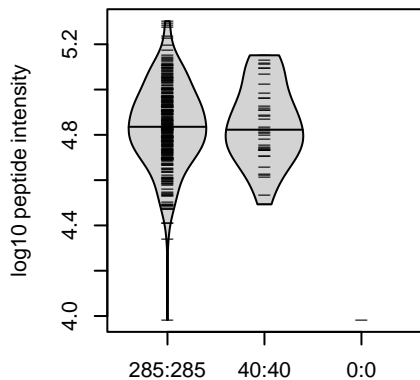

10:7742467:A:G\_G  
p = 0.96, beta = 0.0085, N = 325

**HLEVDVWVIEPQGLR pc3  
P19823;Q5T985**

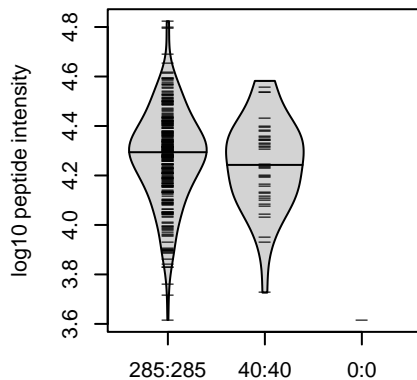

10:7742467:A:G\_G  
p = 0.22, beta = -0.203, N = 325

**IQPSGGTNINEALLR pc2  
P19823;Q5T985**

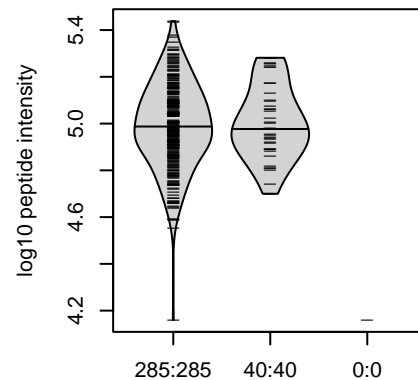

10:7742467:A:G\_G  
p = 0.83, beta = 0.0358, N = 325

**IYGNQDTSSQLK pc2  
P19823;Q5T985**

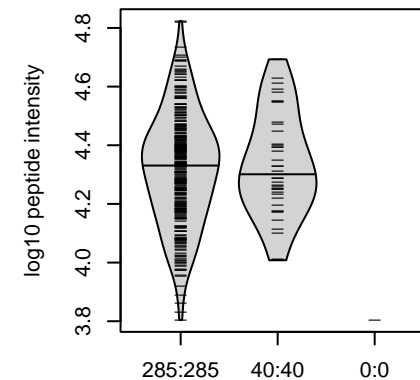

10:7742467:A:G\_G  
p = 0.56, beta = 0.0984, N = 325

Assay Target: ITIH2  
Olink UniProt: P19823  
deCODE rsID: rs77938199  
Proxy rsID: rs77938199  
deCODE: 10:7700504:G:A  
Proxy SNP: 10:7742467:A:G  
deCODE log10(p): 855.8  
deCODE BETA: 1.01  
-----  
1259:1259:1259:1259:1258:125



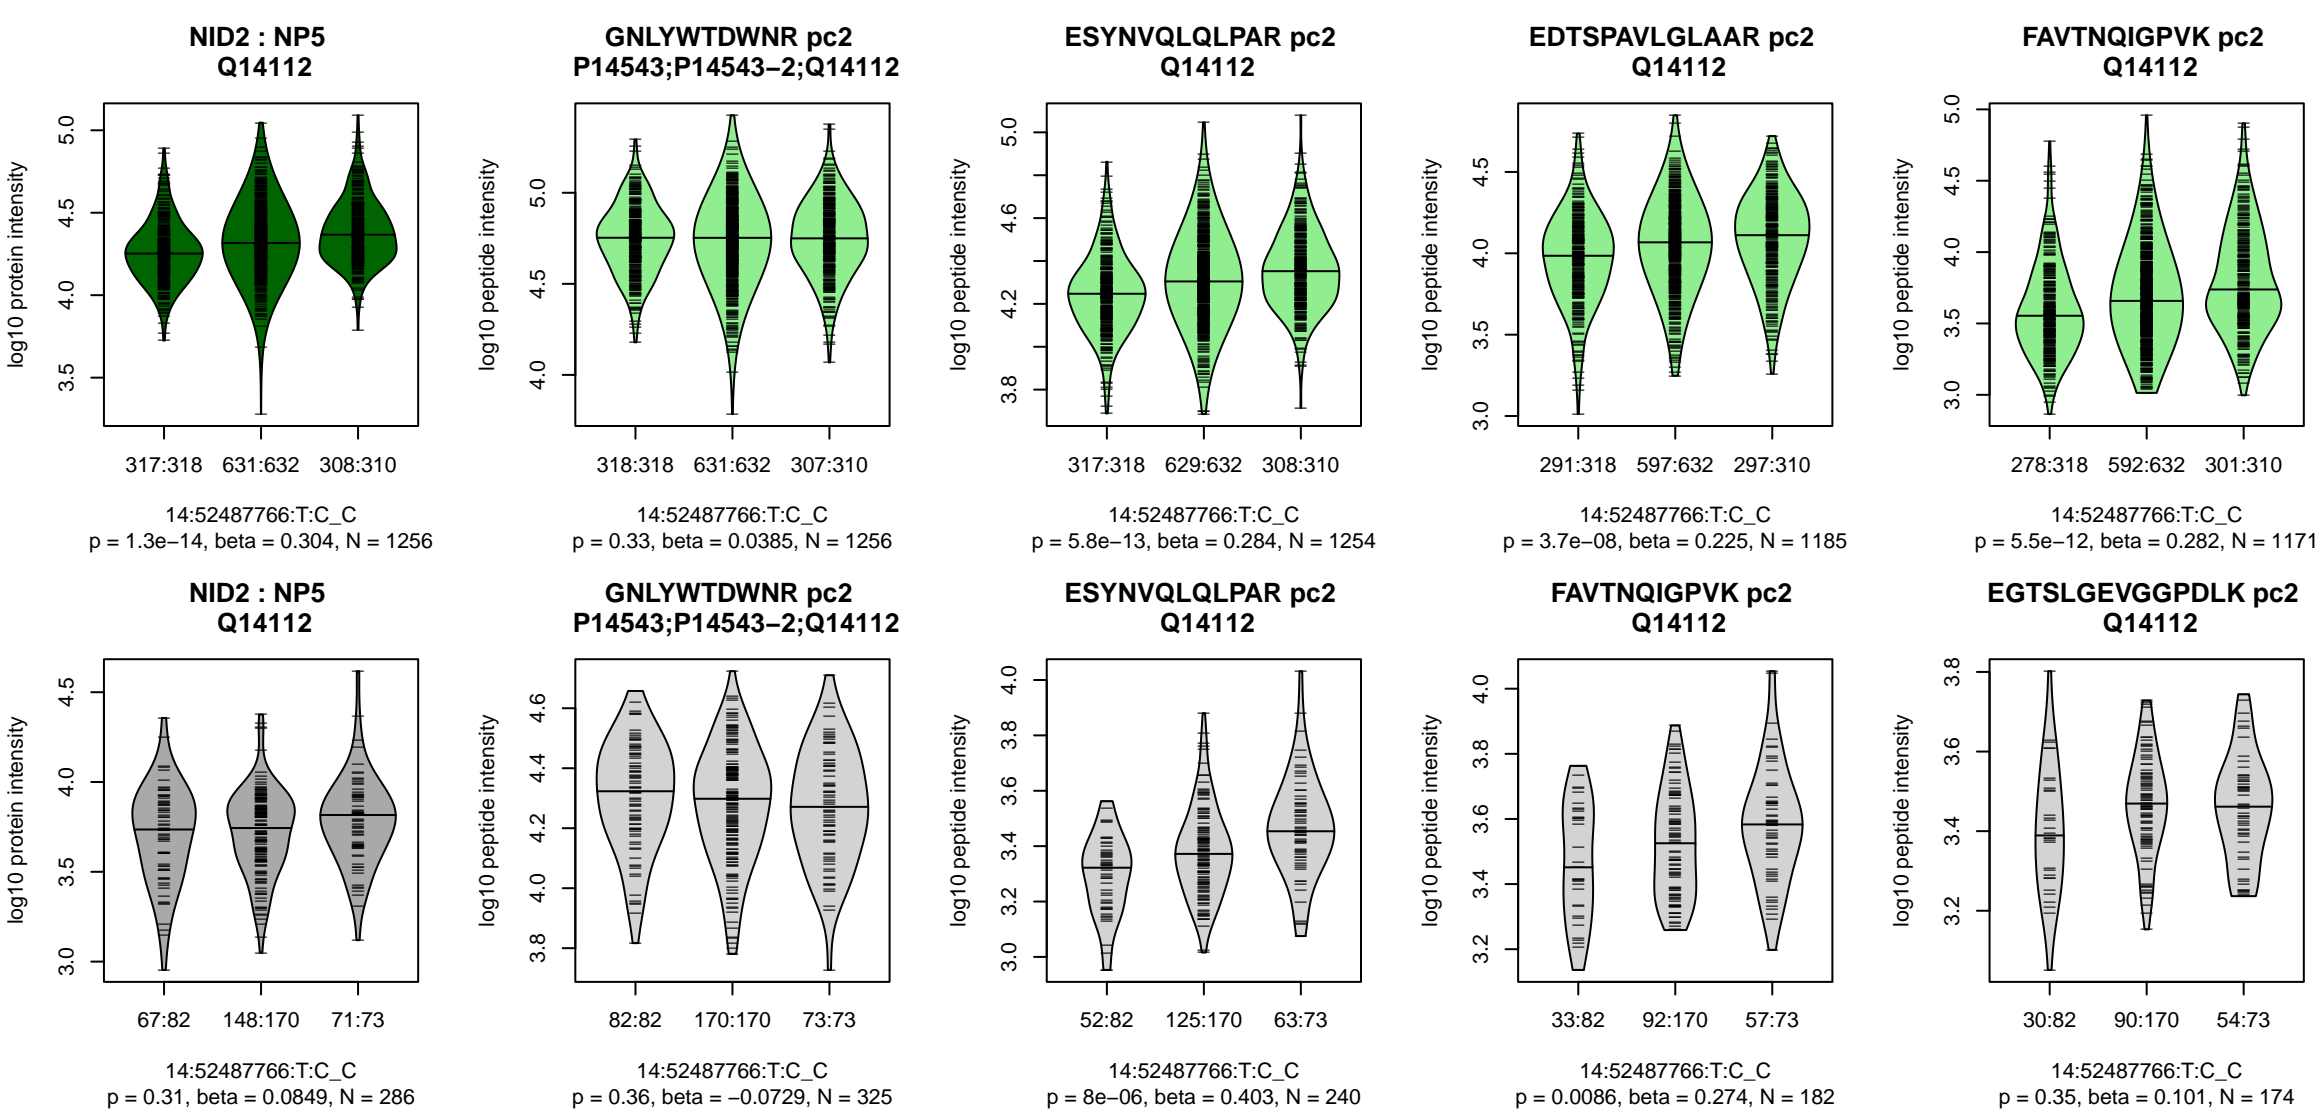

Assay Target: NID2  
 Olink UniProt: Q14112  
 deCODE rsID: rs2516600  
 Proxy rsID: rs2516600  
 deCODE: 14:52021048:T:C  
 Proxy SNP: 14:52487766:T:C  
 deCODE log<sub>10</sub>(p): 829.6  
 deCODE BETA: -0.49  
 .....  
 1256:1254:1185:1171:1164:107

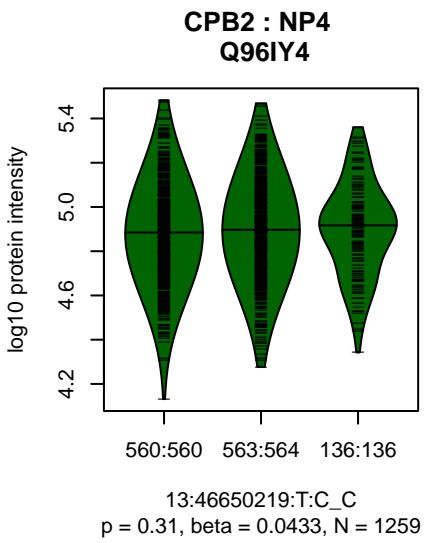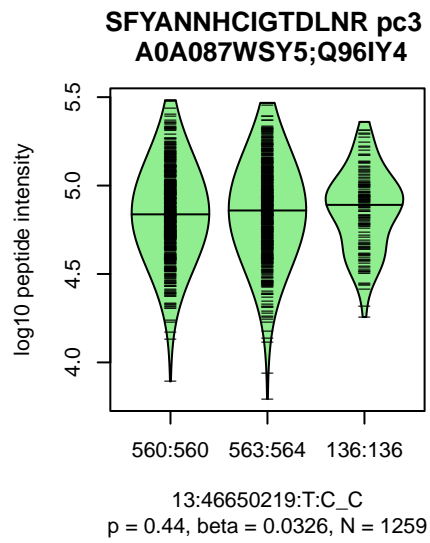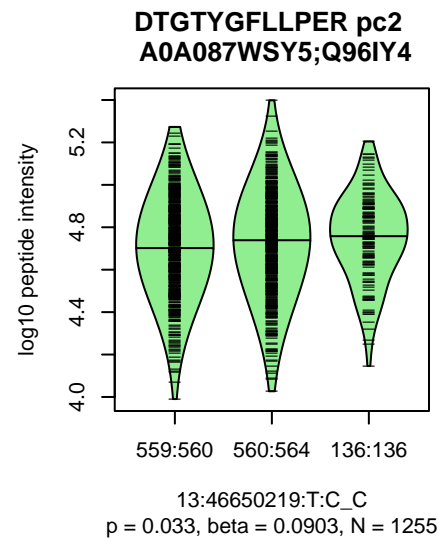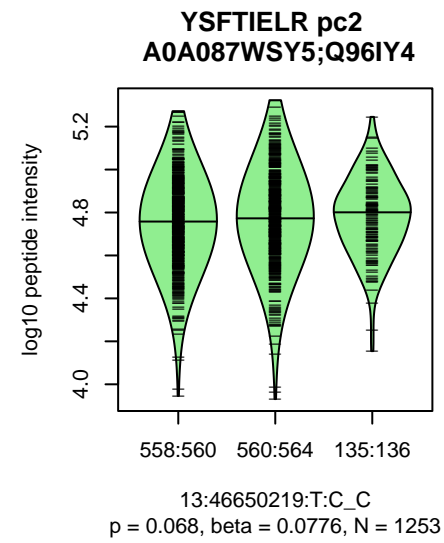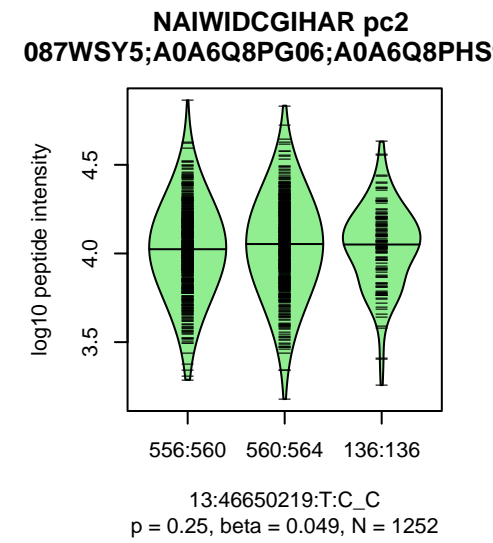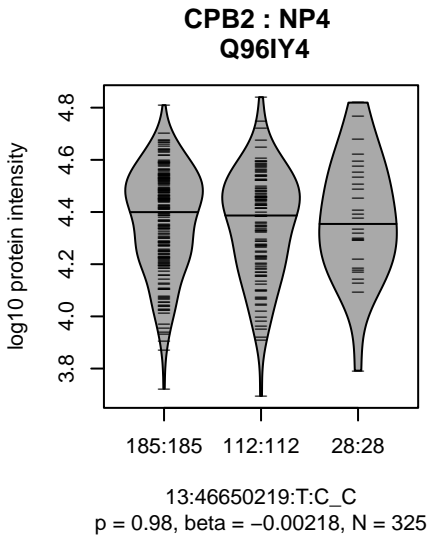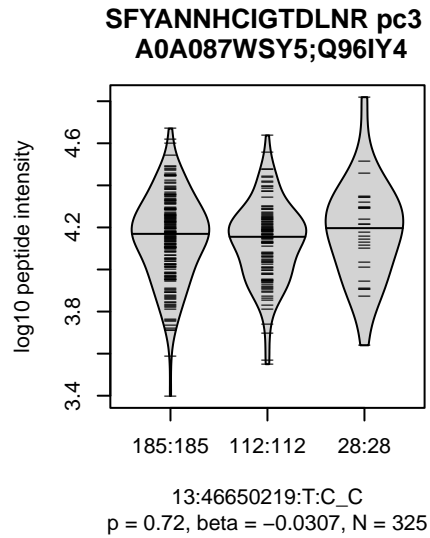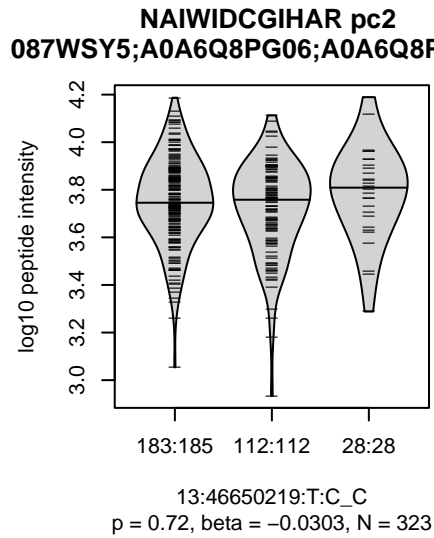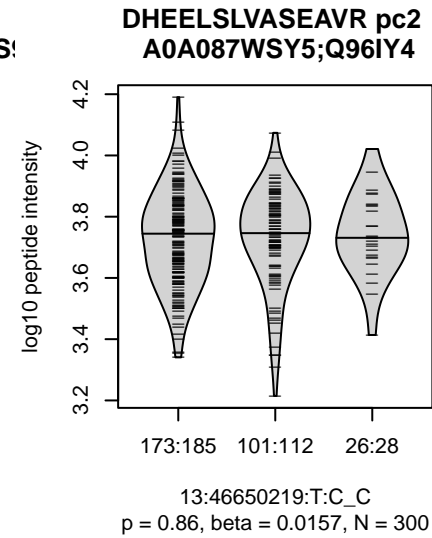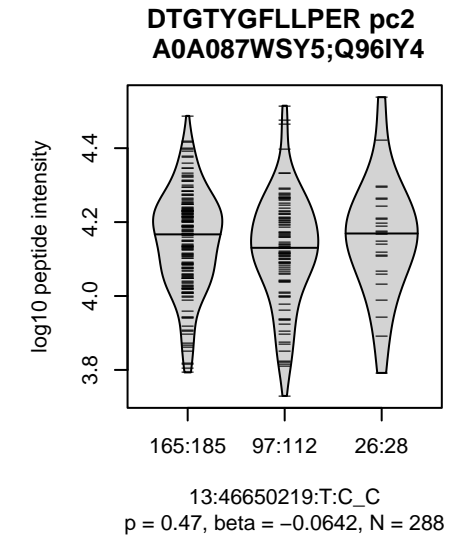

Assay Target: CPB2  
 Olink UniProt: Q96IY4  
 deCODE rsID: rs9534312  
 Proxy rsID: rs9534312  
 deCODE: 13:46076084:C:T  
 Proxy SNP: 13:46650219:T:C  
 deCODE log10(p): 764.1  
 deCODE BETA: 0.5  
 -----  
 1259:1255:1253:1252:1247:124

**CCL14 : NP4**  
**Q16627**

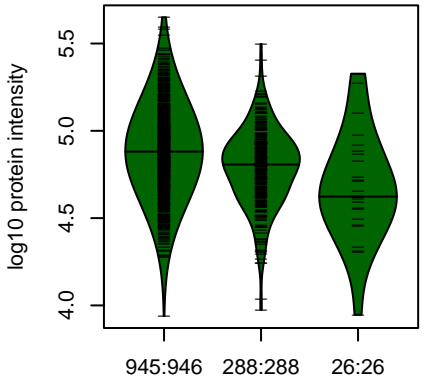

17:34335694:C:T\_T  
p = 7.2e-16, beta = -0.458, N = 1259

**PGIVFITK pc2**  
**A0A087X089;Q16627;Q16627-2**

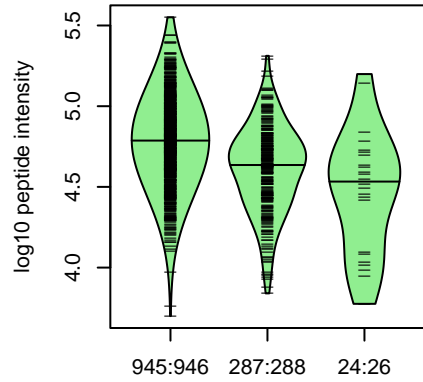

17:34335694:C:T\_T  
p = 2.8e-27, beta = -0.614, N = 1256

**WVQDYIK pc2**  
**A0A087X089;Q16627;Q16627-2** **0A087X089;A0A0B4J2G5;Q16627;Q16**

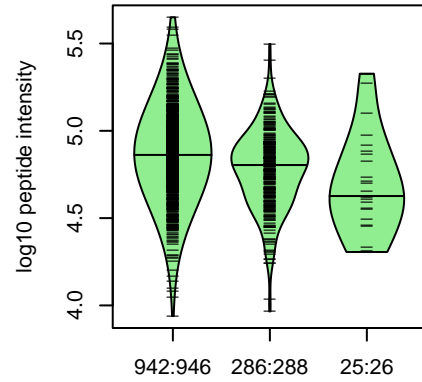

17:34335694:C:T\_T  
p = 4.6e-13, beta = -0.415, N = 1253

**IMDYETNSQCSK pc2**  
**A0A087X089;Q16627;Q16627-2** **GHSVCTNPSDK pc2**  
**A0A087X089;Q16627;Q16627-2**

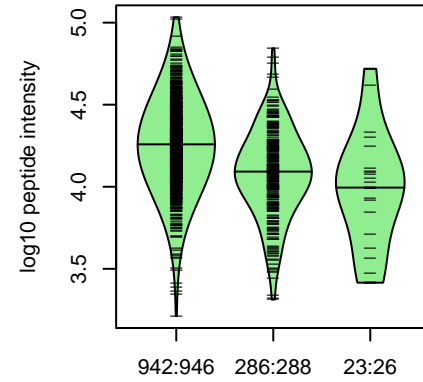

17:34335694:C:T\_T  
p = 3.8e-31, beta = -0.661, N = 1251

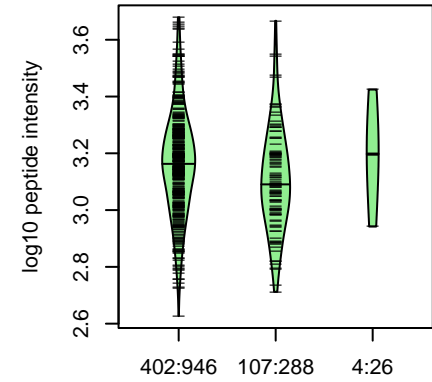

17:34335694:C:T\_T  
p = 0.0012, beta = -0.324, N = 513

**CCL14 : NP4**  
**Q16627**

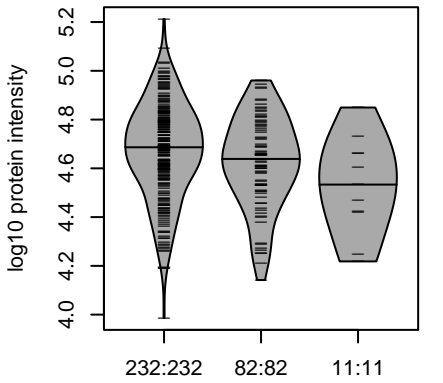

17:34335694:C:T\_T  
p = 7e-04, beta = -0.345, N = 325

**IMDYETNSQCSK pc2**  
**0A087X089;A0A0B4J2G5;Q16627;Q16**

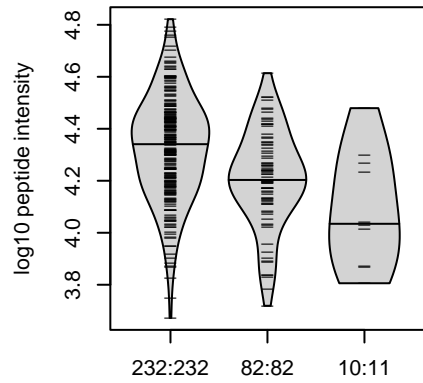

17:34335694:C:T\_T  
p = 5.8e-10, beta = -0.627, N = 324

**PGIVFITK pc2**  
**A0A087X089;Q16627;Q16627-2**

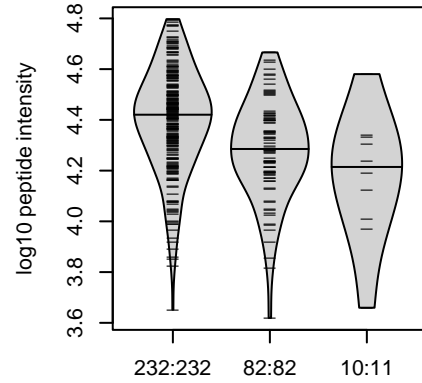

17:34335694:C:T\_T  
p = 1.7e-08, beta = -0.574, N = 324

**WVQDYIK pc2**  
**A0A087X089;Q16627;Q16627-2**

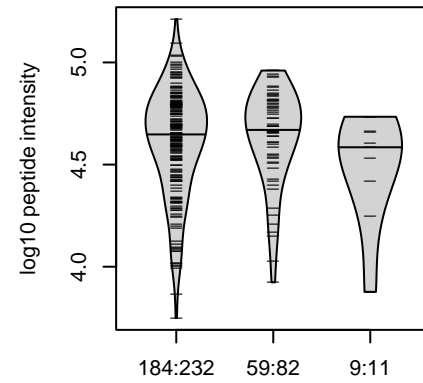

17:34335694:C:T\_T  
p = 0.48, beta = -0.0831, N = 252

**GPYHPSECCFTYTTYK pc3**  
**A0A0B4J2G5;Q16627**

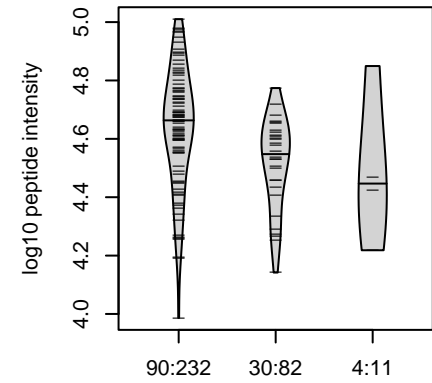

17:34335694:C:T\_T  
p = 0.0032, beta = -0.482, N = 124

Assay Target: CCL14  
Olink UniProt: Q16627  
deCODE rsID: rs7222922  
Proxy rsID: rs7222922  
deCODE: 17:36008654:T:C  
Proxy SNP: 17:34335694:C:T  
deCODE log10(p): 737.6  
deCODE BETA: -0.86  
\*.\*.\*.\*.\*-  
1256:1253:1251:513:239:32





**CNRIP1 : NP3  
Q96F85**

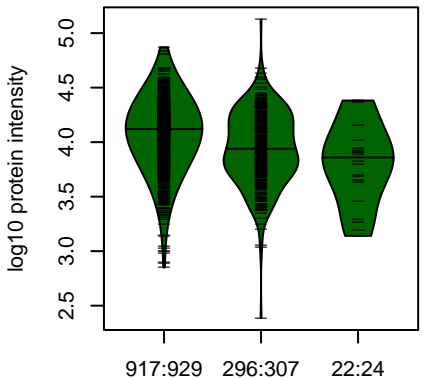

2:68579931:A:G\_G  
p = 9.9e-11, beta = -0.375, N = 1235

**IQPNDGPVFYK pc2  
B8ZZB8;Q96F85;Q96F85-2**

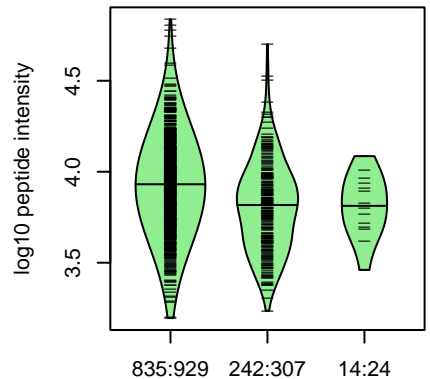

2:68579931:A:G\_G  
p = 1.6e-09, beta = -0.392, N = 1091

**VVYTGTYDTEGVTPTK pc2  
B8ZZB8;Q96F85;Q96F85-2**

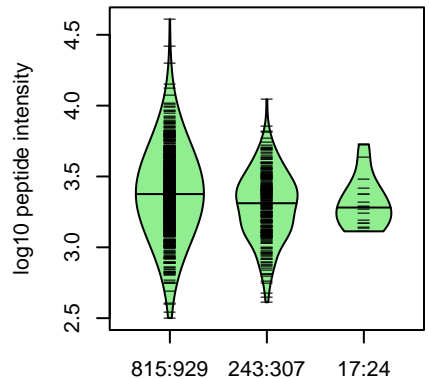

2:68579931:A:G\_G  
p = 2.9e-06, beta = -0.299, N = 1075

**SLMWVVK pc2  
Q96F85**

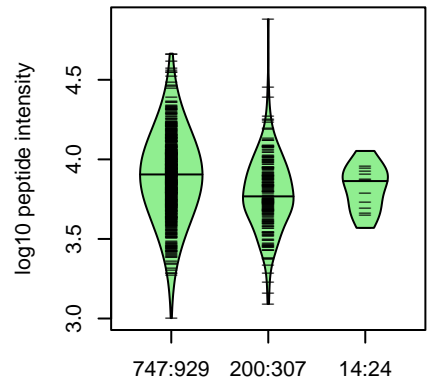

2:68579931:A:G\_G  
p = 3e-09, beta = -0.412, N = 961

**LLTGSSYK pc2  
B8ZZB8;Q96F85;Q96F85-2**

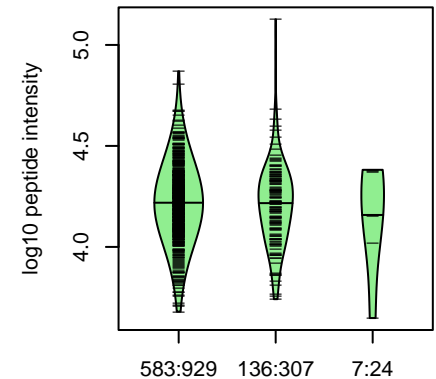

2:68579931:A:G\_G  
p = 0.25, beta = -0.0998, N = 726

**CNRIP1 : NP3  
Q96F85**

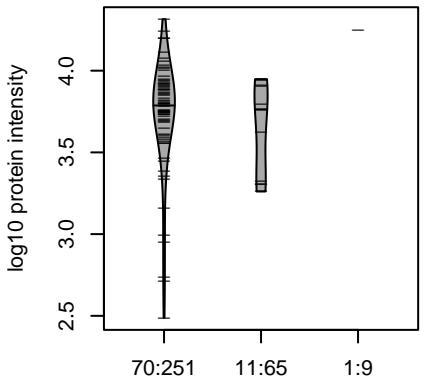

2:68579931:A:G\_G  
p = 0.71, beta = 0.0991, N = 82

**IQPNDGPVFYK pc2  
B8ZZB8;Q96F85;Q96F85-2**

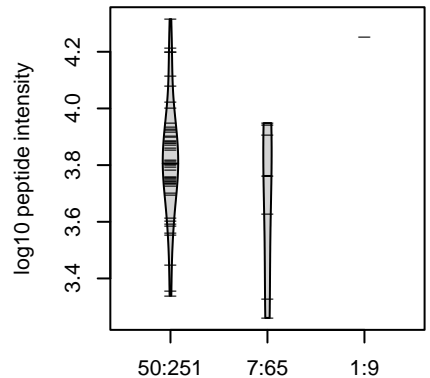

2:68579931:A:G\_G  
p = 1, beta = 0.00121, N = 58

**IKPSTLQVENISIGGVLVPLELK pc3  
B8ZZB8;Q96F85;Q96F85-2**

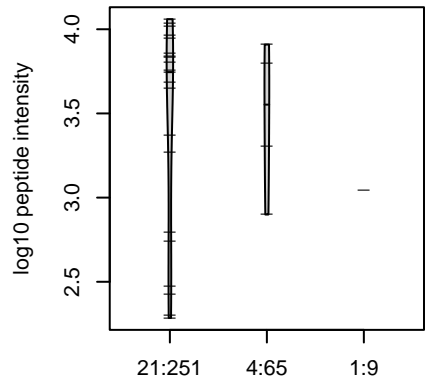

2:68579931:A:G\_G  
p = 0.48, beta = -0.257, N = 26

Assay Target: CNRIP1  
Olink UniProt: Q96F85  
deCODE rsID: rs7578047  
Proxy rsID: rs7578047  
deCODE: 2:68352799:G:A  
Proxy SNP: 2:68579931:A:G  
deCODE log10(p): 707.8  
deCODE BETA: -0.66  
\*.\*.\*.-.-.-.-:NA  
1091:1075:961:726:424:225:64:







**PPIC : NP3  
P45877**

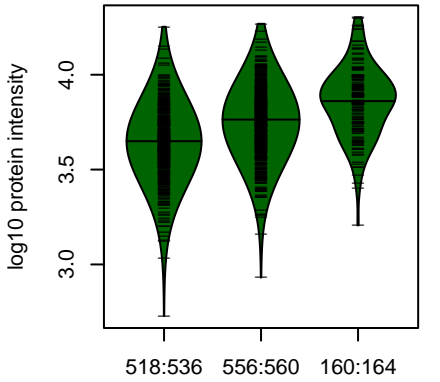

5:122360403:T:C\_C  
 $p = 2.1e-44$ ,  $\beta = 0.559$ ,  $N = 1234$

**TVENFVALATGEK pc2  
P45877**

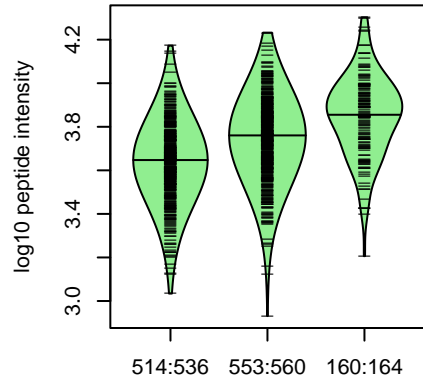

5:122360403:T:C\_C  
 $p = 1.7e-42$ ,  $\beta = 0.548$ ,  $N = 1227$

**IVIGLFGK pc2  
P45877**

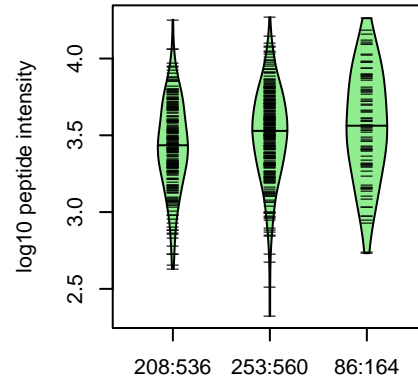

5:122360403:T:C\_C  
 $p = 1.4e-05$ ,  $\beta = 0.262$ ,  $N = 547$

**PPIC : NP3  
P45877**

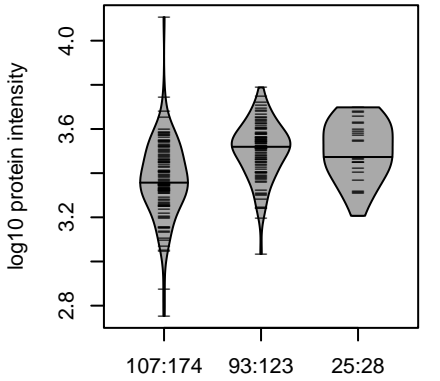

5:122360403:T:C\_C  
 $p = 1.6e-05$ ,  $\beta = 0.412$ ,  $N = 225$

**TVENFVALATGEK pc2  
P45877**

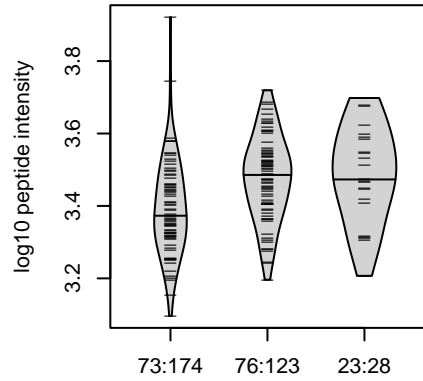

5:122360403:T:C\_C  
 $p = 0.0026$ ,  $\beta = 0.324$ ,  $N = 172$

**IVIGLFGK pc2  
P45877**

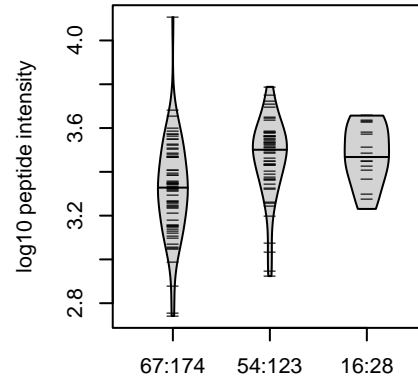

5:122360403:T:C\_C  
 $p = 0.0018$ ,  $\beta = 0.375$ ,  $N = 137$

Assay Target: PPIC  
Olink UniProt: P45877  
deCODE rsID: rs17388251  
Proxy rsID: rs17388251  
deCODE: 5:123024708:C:T  
Proxy SNP: 5:122360403:T:C  
deCODE  $\log_{10}(p)$ : 585.3  
deCODE BETA: -0.42  
\*.\*  
1227:547

**CPN2 : NP4  
P22792**

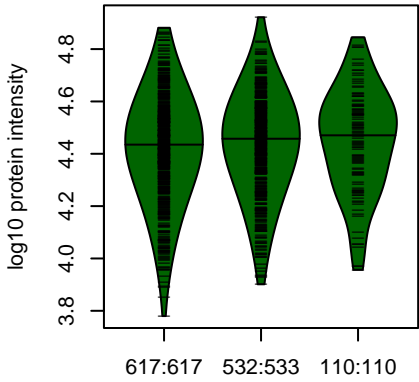

3:194062519:C:T\_T  
p = 0.13, beta = 0.0652, N = 1259

**AGGSWDLAVQER pc2  
P22792**

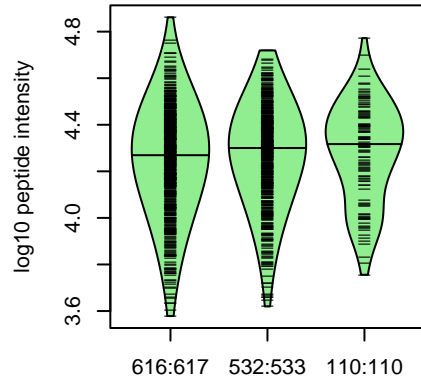

3:194062519:C:T\_T  
p = 0.092, beta = 0.0735, N = 1258

**QLVCPVTR pc2  
P22792**

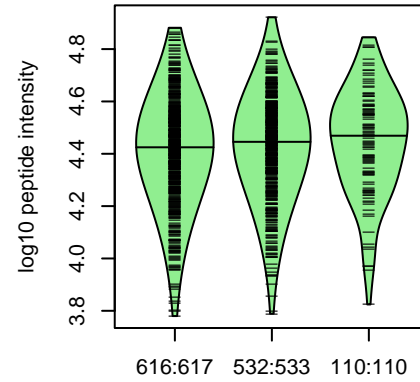

3:194062519:C:T\_T  
p = 0.11, beta = 0.0691, N = 1258

**NIIFVETSFTTLETR pc2  
P22792**

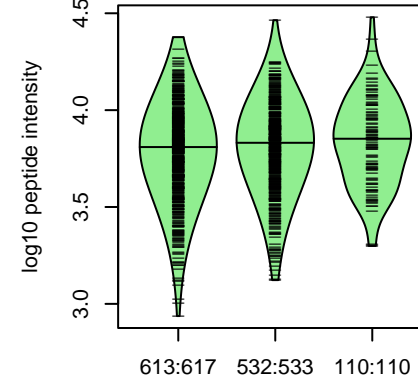

3:194062519:C:T\_T  
p = 0.018, beta = 0.103, N = 1255

**DHLGFQVTWPDESK pc3  
P22792**

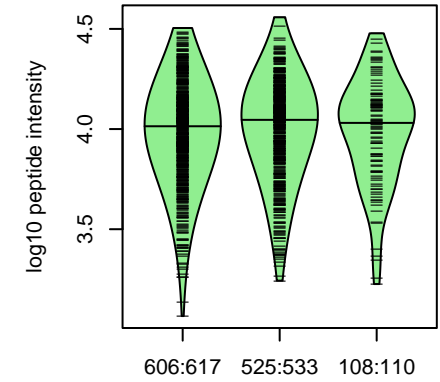

3:194062519:C:T\_T  
p = 0.79, beta = 0.0116, N = 1239

**CPN2 : NP4  
P22792**

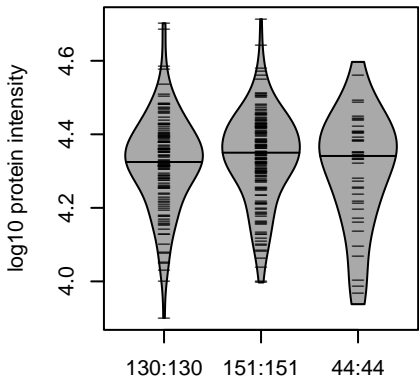

3:194062519:C:T\_T  
p = 0.86, beta = 0.0139, N = 325

**AGGSWDLAVQER pc2  
P22792**

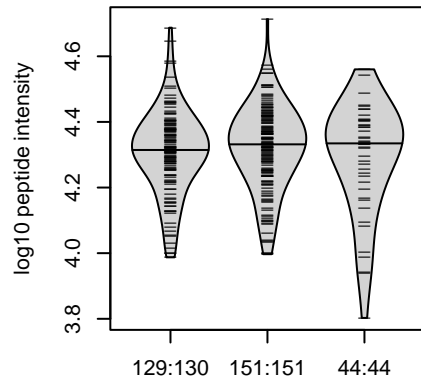

3:194062519:C:T\_T  
p = 0.85, beta = 0.0155, N = 324

**DHLGFQVTWPDESK pc3  
P22792**

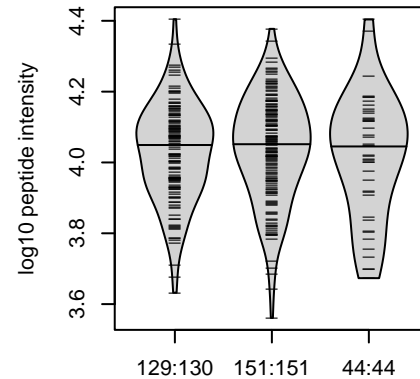

3:194062519:C:T\_T  
p = 0.91, beta = 0.0089, N = 324

**QLVCPVTR pc2  
P22792**

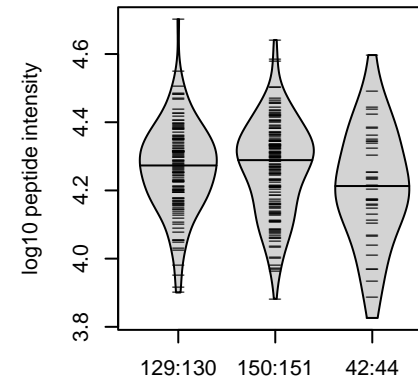

3:194062519:C:T\_T  
p = 0.19, beta = -0.107, N = 321

**LSNNALSGLPQG VFGK pc2  
P22792**

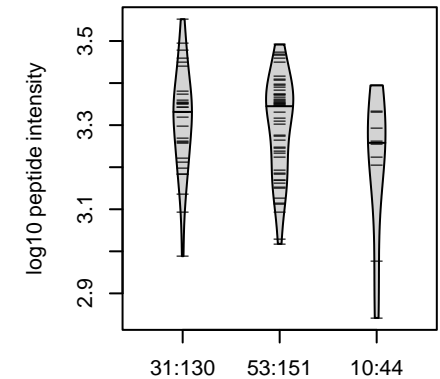

3:194062519:C:T\_T  
p = 0.16, beta = -0.227, N = 94

**LTMSIEAR pc2  
rs11711157 ALT**

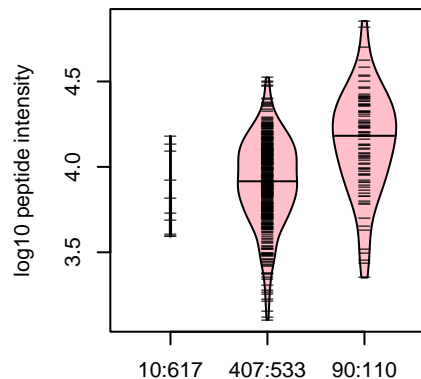

3:194062519:C:T\_T  
p = 2.2e-198, model = REC, N = 507

**WLVNQLSPR pc2  
rs4974538 ALT**

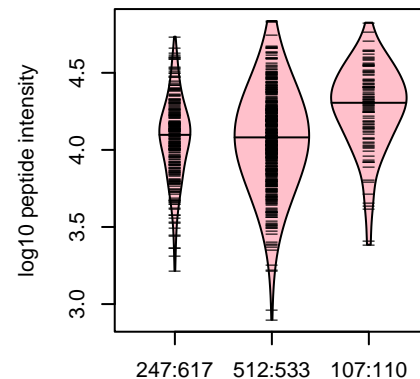

3:194062519:C:T\_T  
p = 9.8e-117, model = REC, N = 866

**LTVSIEAR pc2  
rs11711157 REF**

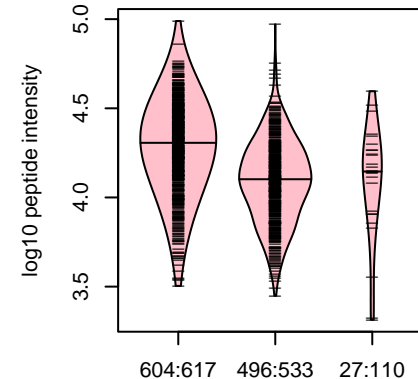

3:194062519:C:T\_T  
p = 4.1e-70, model = DOM, N = 1127

Assay Target: CPN2  
Olink UniProt: P22792  
deCODE rsID: rs3732477  
Proxy rsID: rs3732477  
deCODE: 3:194341790:T:C  
Proxy SNP: 3:194062519:C:T  
deCODE log10(p): 571.1  
deCODE BETA: -0.5  
-----  
1258:1258:1255:1239:913:632:3







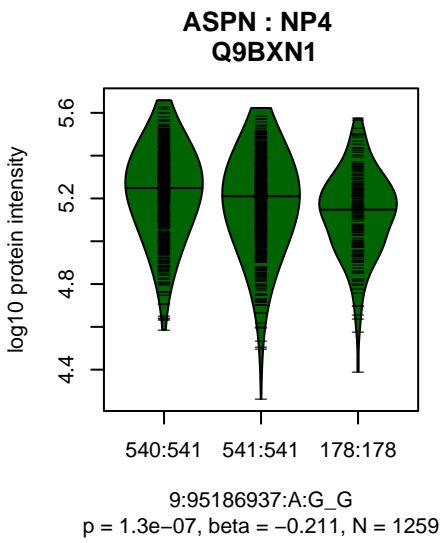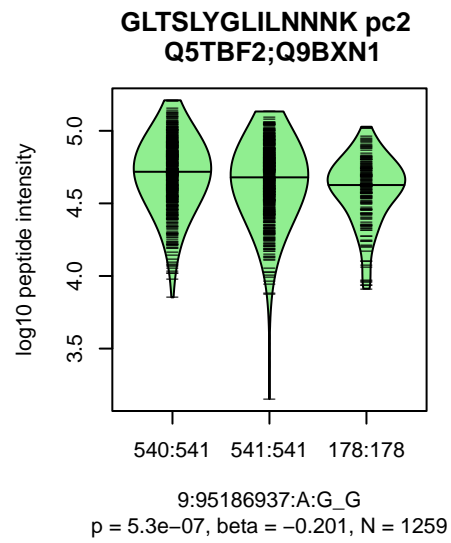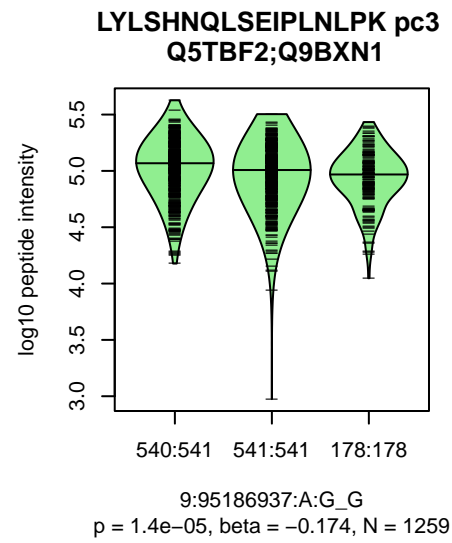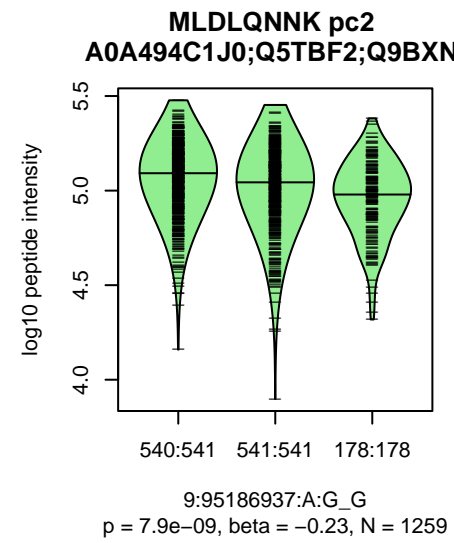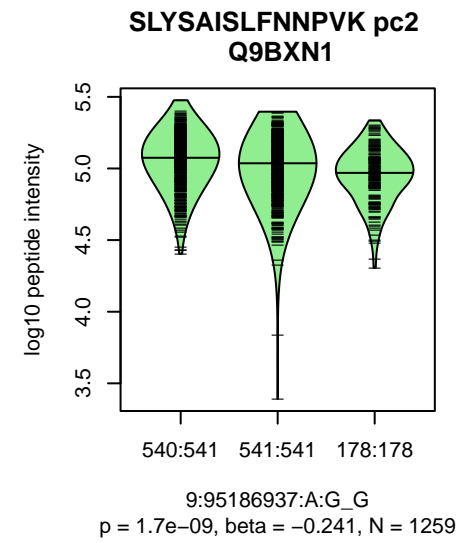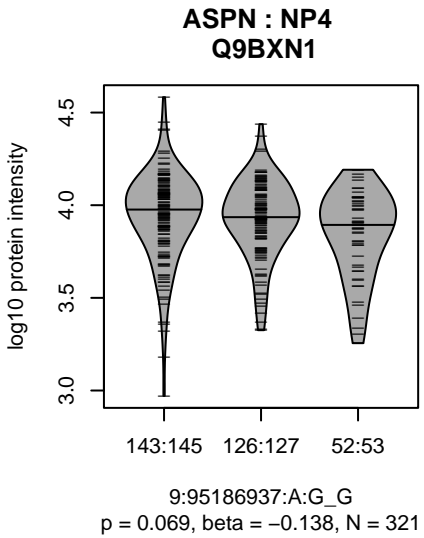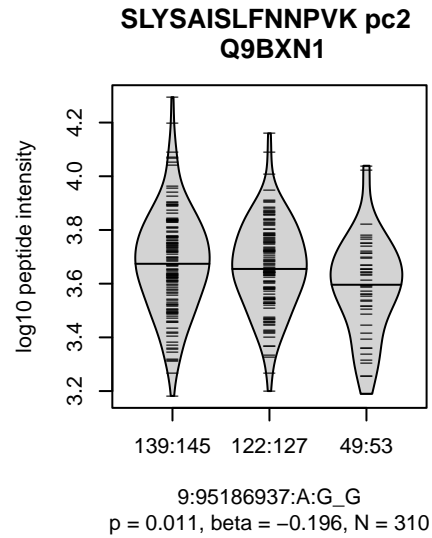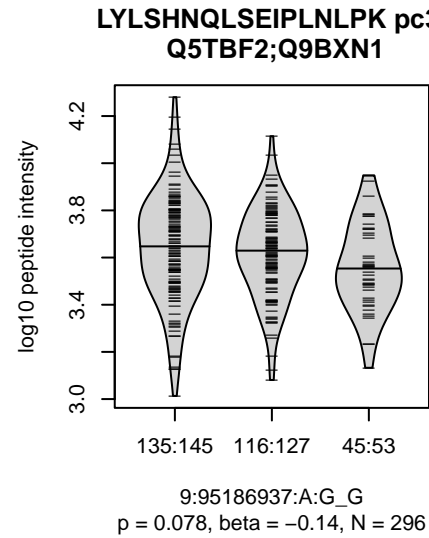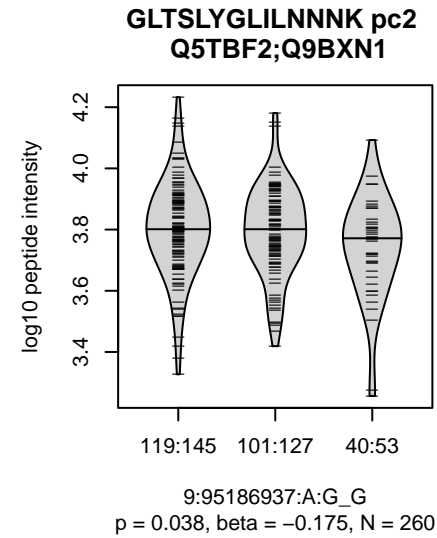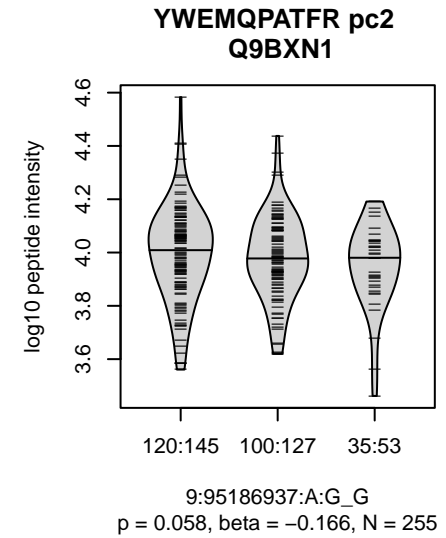

Assay Target: ASPN  
 Olink UniProt: Q9BXN1  
 deCODE rsID: rs2761681  
 Proxy rsID: rs2761681  
 deCODE: 9:92424655:G:A  
 Proxy SNP: 9:95186937:A:G  
 deCODE log10(p): 490.7  
 deCODE BETA: -0.39  
 \*\*\*\*\*  
 1259:1259:1259:1259:1259:125

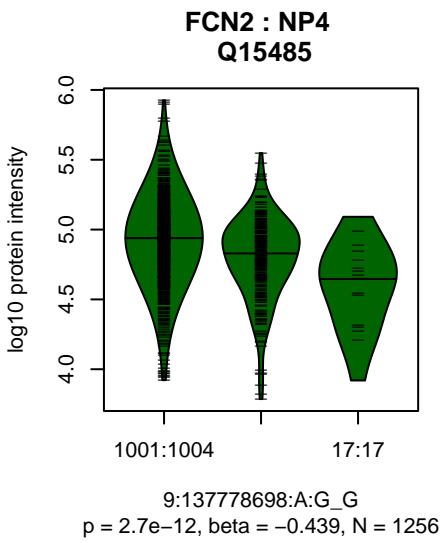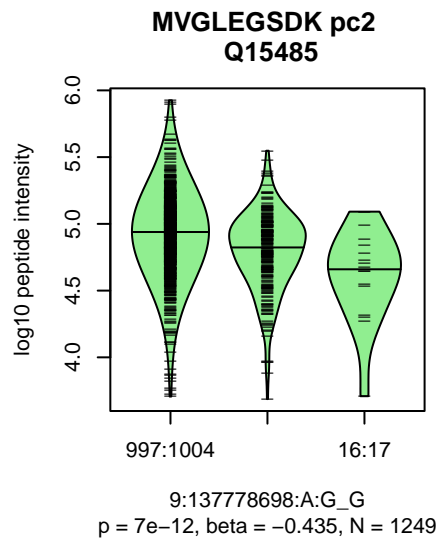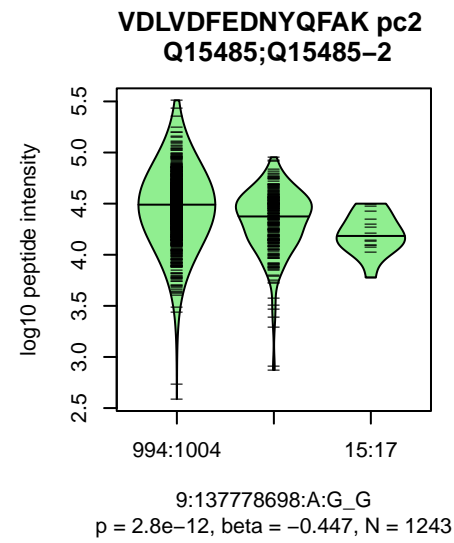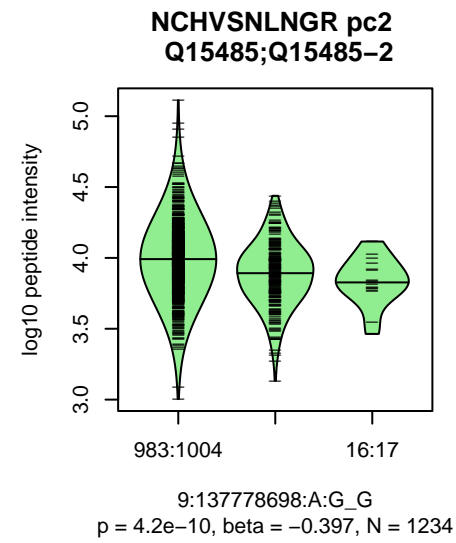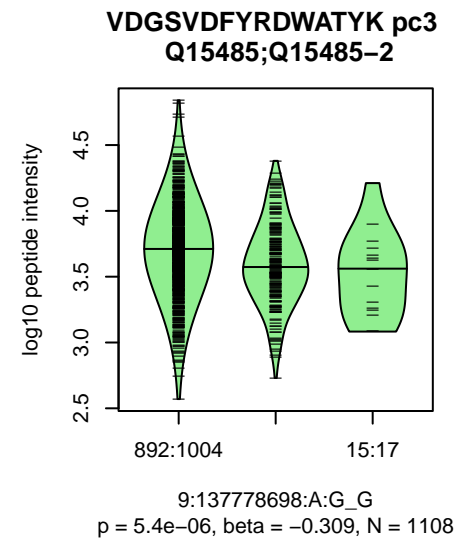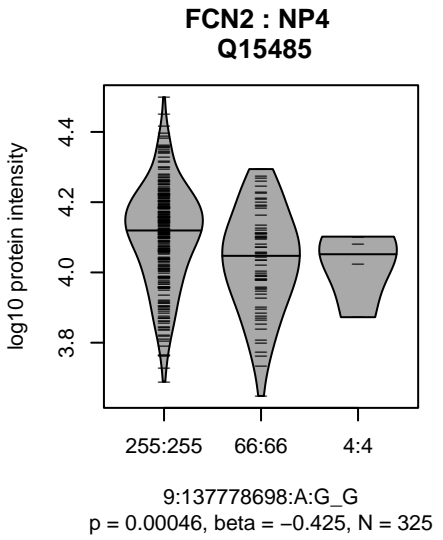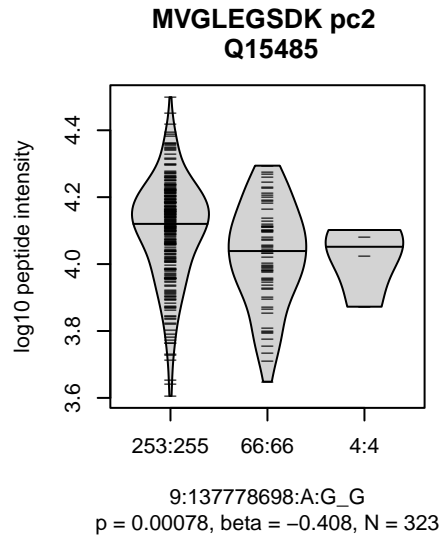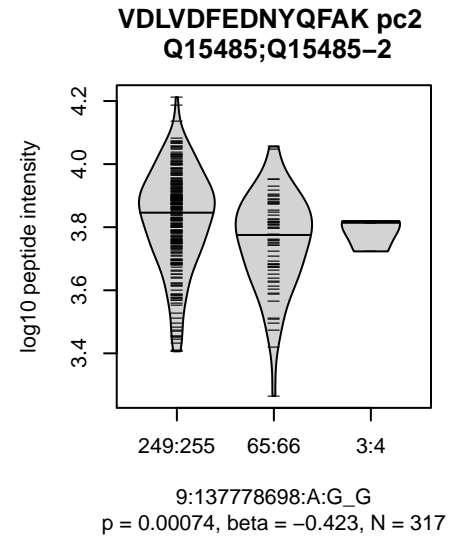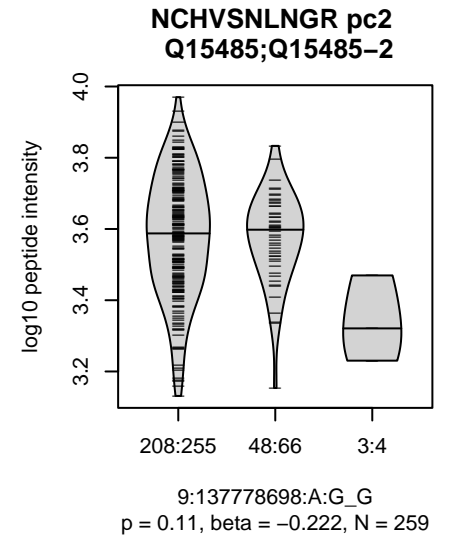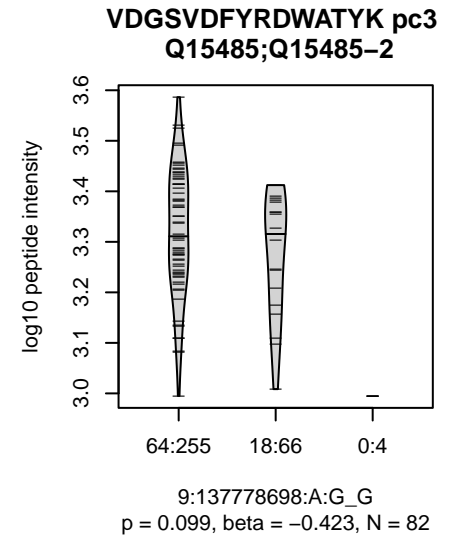

**DQDNDLNTGNCVAVMFQGAWWYK p  
rs7851696 REF**

Assay Target: FCN2  
 Olink UniProt: Q15485  
 deCODE rsID: rs11103563  
 Proxy rsID: rs11103563  
 deCODE: 9:134886852:G:A  
 Proxy SNP: 9:137778698:A:G  
 deCODE log10(p): 483.5  
 deCODE BETA: -0.66  
 \*\*\*\*\*-:-:-:-:-  
 1249:1243:1234:1108:1023:948

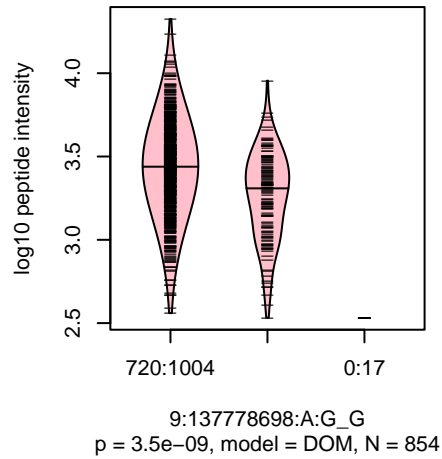

**OAF : NP5  
Q86UD1**

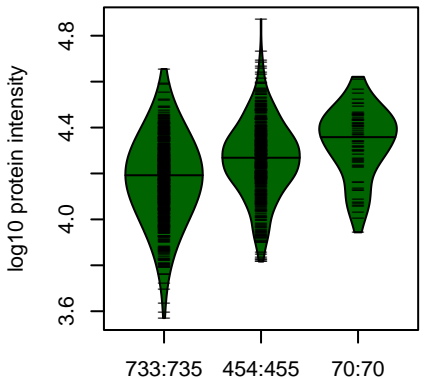

11:120101092:A:T\_A  
p = 6.9e-21, beta = 0.431, N = 1257

**SYSDFYVPQR pc2  
E9PJ29;Q86UD1**

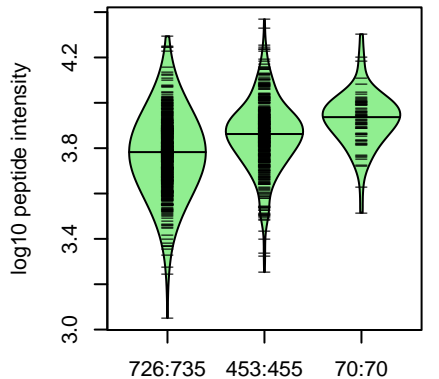

11:120101092:A:T\_A  
p = 1.5e-22, beta = 0.449, N = 1249

**ALILGELEK pc2  
Q86UD1**

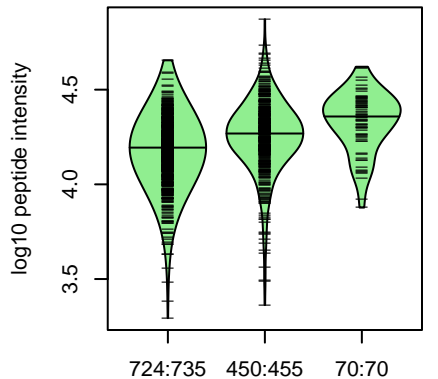

11:120101092:A:T\_A  
p = 3.2e-18, beta = 0.403, N = 1244

**KPDGTLVSFTADFK pc3  
Q86UD1**

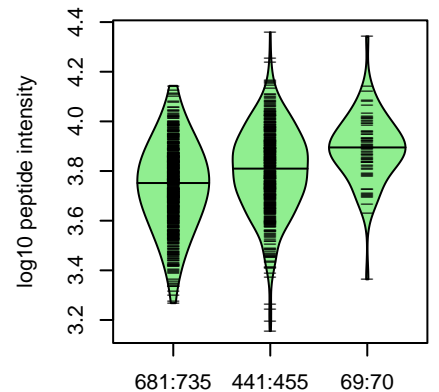

11:120101092:A:T\_A  
p = 1.1e-13, beta = 0.35, N = 1191

**ASEQAELPR pc2  
E9PJ29;Q86UD1**

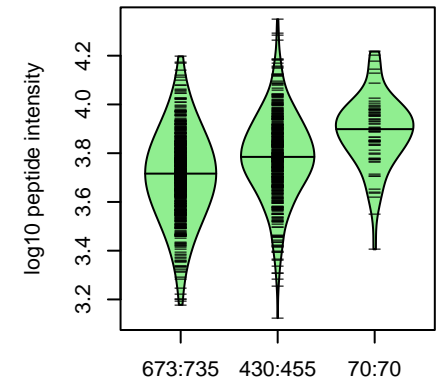

11:120101092:A:T\_A  
p = 2.3e-20, beta = 0.435, N = 1173

**OAF : NP5  
Q86UD1**

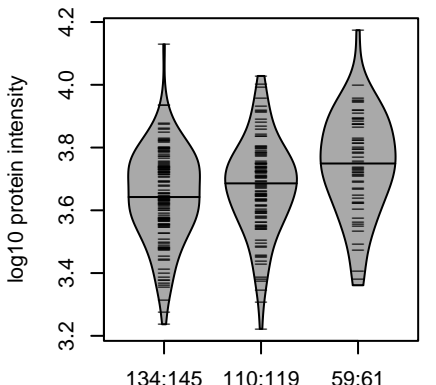

11:120101092:A:T\_A  
p = 0.00055, beta = 0.256, N = 303

**SYSDFYVPQR pc2  
E9PJ29;Q86UD1**

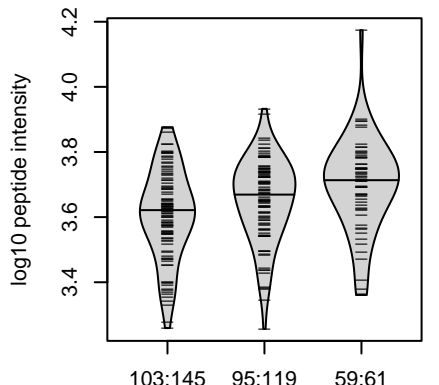

11:120101092:A:T\_A  
p = 0.012, beta = 0.198, N = 257

**ALILGELEK pc2  
Q86UD1**

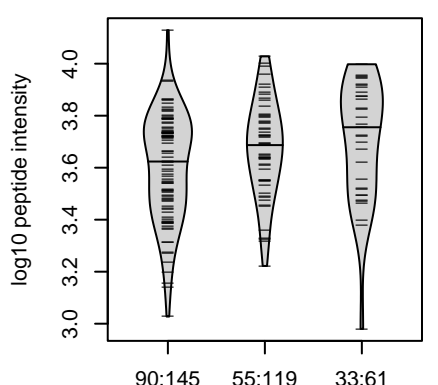

11:120101092:A:T\_A  
p = 0.011, beta = 0.242, N = 178

**KPDGTLVSFTADFK pc3  
Q86UD1**

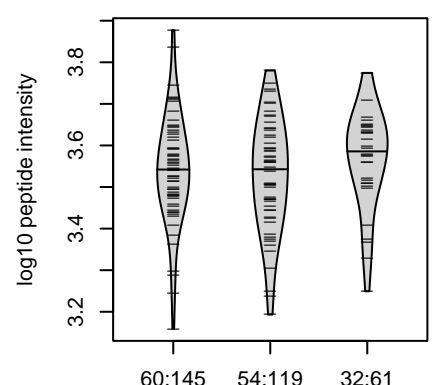

11:120101092:A:T\_A  
p = 0.61, beta = 0.053, N = 146

**ASEQAELPR pc2  
E9PJ29;Q86UD1**

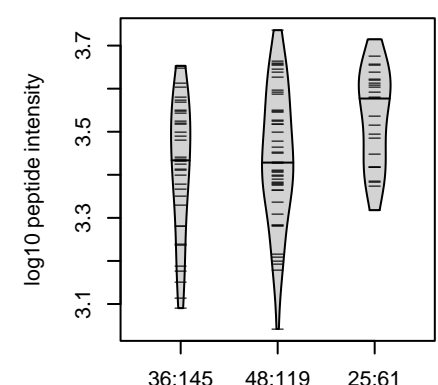

11:120101092:A:T\_A  
p = 0.024, beta = 0.28, N = 109

**YGLSLAWYPCMLK pc2  
rs2508490 REF**

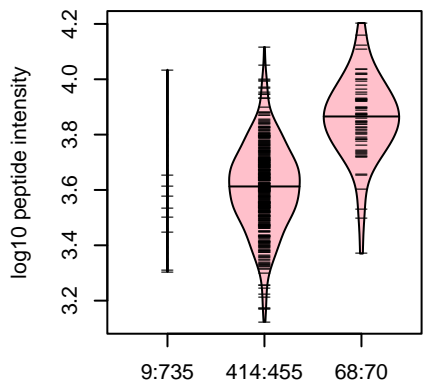

11:120101092:A:T\_A  
p = 2.5e-281, model = REC, N = 491

Assay Target: OAF  
Olink UniProt: Q86UD1  
deCODE rsID: rs2845705  
Proxy rsID: rs2845705  
deCODE: 11:120230383:A:T  
Proxy SNP: 11:120101092:A:T  
deCODE log10(p): 476.8  
deCODE BETA: 0.5  
\*.\*.\*.\*.\*  
1249:1244:1191:1173:116

**GDF15 : NP1**  
**Q99988**

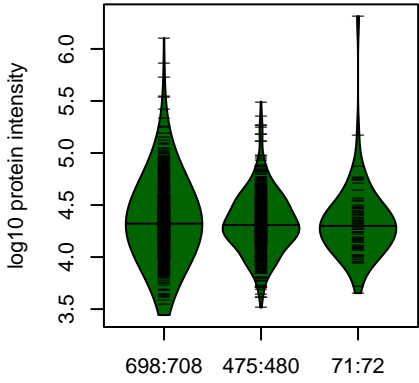

19:18499422:C:G\_G  
p = 0.6, beta = -0.0247, N = 1244

**AALPEGLPEASR pc2**  
**Q99988**

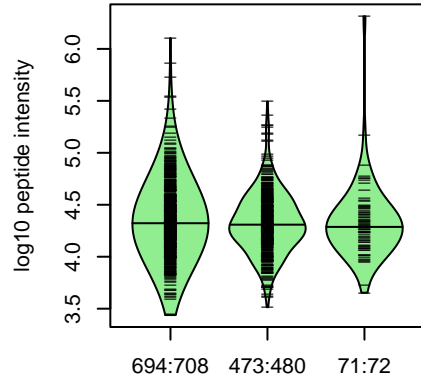

19:18499422:C:G\_G  
p = 0.57, beta = -0.0268, N = 1238

**ASLEDLGWADWVLSR pc2**  
**Q99988**

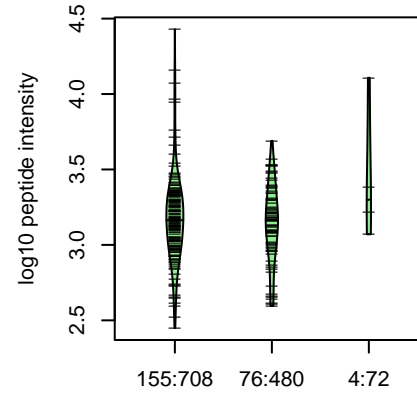

19:18499422:C:G\_G  
p = 0.82, beta = 0.0281, N = 235

**YEDLLTR pc2**  
**Q99988**

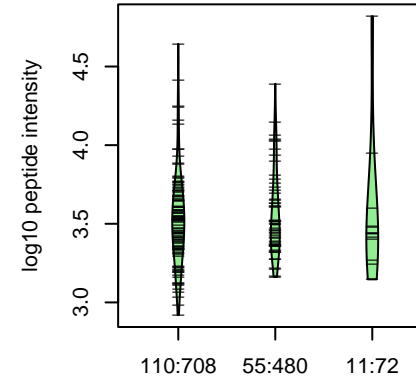

19:18499422:C:G\_G  
p = 0.47, beta = 0.0886, N = 176

**QLSLARPQAPALHLR pc4**  
**Q99988**

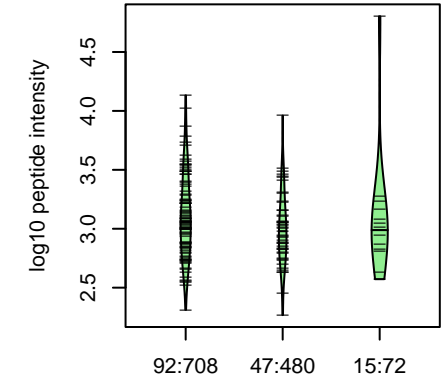

19:18499422:C:G\_G  
p = 0.36, beta = -0.107, N = 154

**GDF15 : NP1**  
**Q99988**

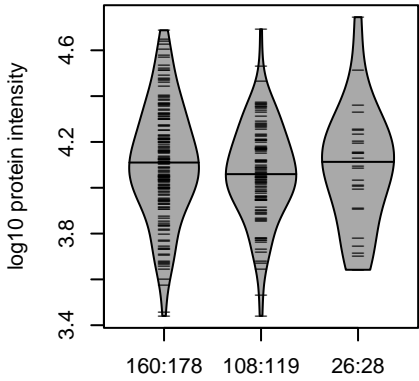

19:18499422:C:G\_G  
p = 0.65, beta = -0.0398, N = 294

**AALPEGLPEASR pc2**  
**Q99988**

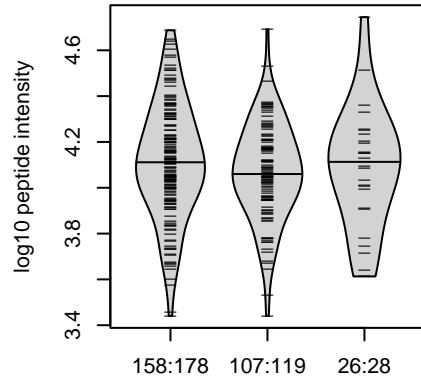

19:18499422:C:G\_G  
p = 0.57, beta = -0.0506, N = 291

**ILTPEVR pc2**  
**Q99988**

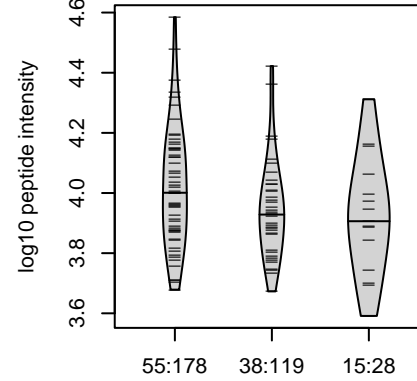

19:18499422:C:G\_G  
p = 0.11, beta = -0.21, N = 108

**ASFPGPSSELHSEDSR pc3**  
**rs1059369 REF**

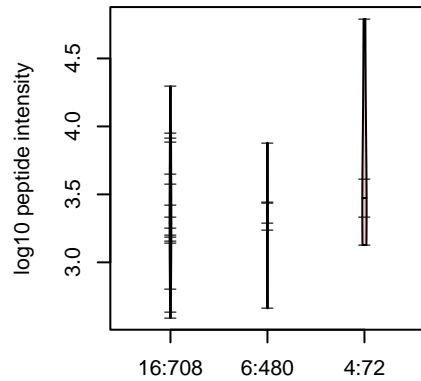

19:18499422:C:G\_G  
p = 0.056, model = DOM, N = 26

**NGDDCPLGPGR pc2**  
**rs1058587 ALT**

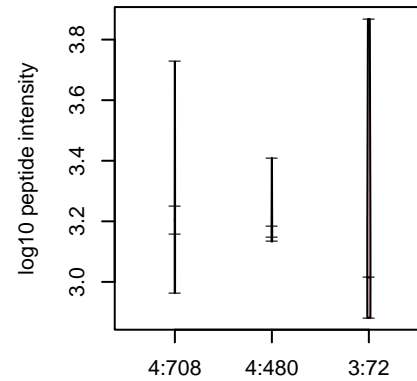

19:18499422:C:G\_G  
p = NA, model = NA, N = 11

Assay Target: GDF15  
Olink UniProt: Q99988  
deCODE rsID: rs1058587  
Proxy rsID: rs1058587  
deCODE: 19:18388612:G:C  
Proxy SNP: 19:18499422:C:G  
deCODE log10(p): 476.4  
deCODE BETA: 0.45  
-----NA:NA:NA  
1238:235:176:154:152:108:95:8

**GPC1 : NP2  
P35052**

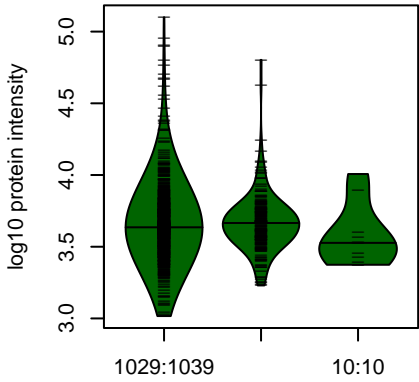

2:241405479:C:T\_T  
p = 0.7, beta = 0.0267, N = 1247

**SFVQQLGVASDVVR pc2  
H7C410;P35052**

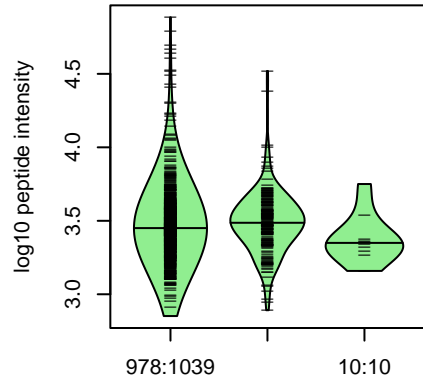

2:241405479:C:T\_T  
p = 0.46, beta = 0.0523, N = 1190

**GFSLSDVPQAEISGEHLR pc3  
P35052**

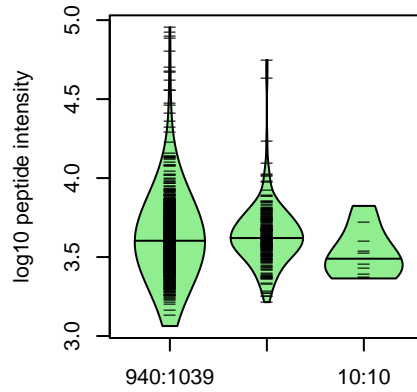

2:241405479:C:T\_T  
p = 0.52, beta = 0.0454, N = 1147

**MALSTASDDR pc2  
H7C410;P35052**

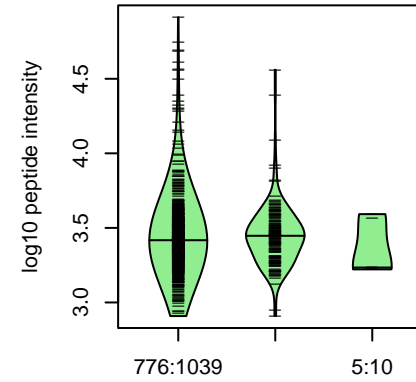

2:241405479:C:T\_T  
p = 0.63, beta = 0.0392, N = 940

**VLQAMLATQLR pc2  
H7C410;P35052**

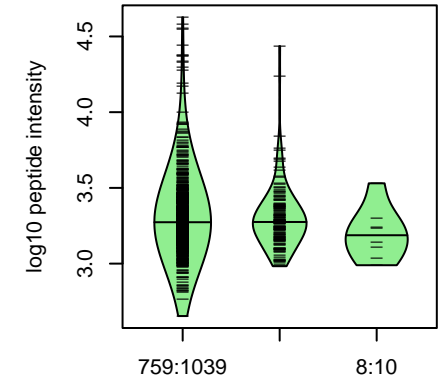

2:241405479:C:T\_T  
p = 0.48, beta = -0.0573, N = 913

**GPC1 : NP2  
P35052**

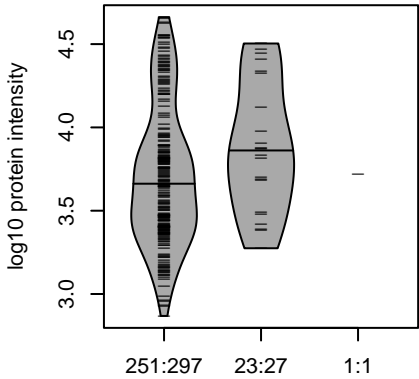

2:241405479:C:T\_T  
p = 0.054, beta = 0.382, N = 275

**SFVQQLGVASDVVR pc2  
H7C410;P35052**

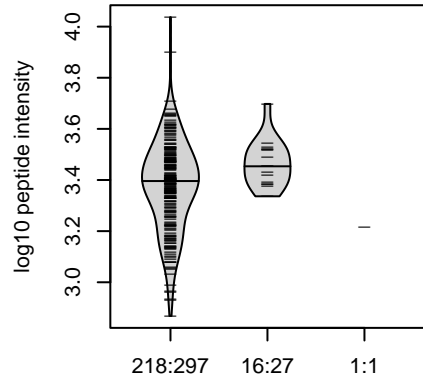

2:241405479:C:T\_T  
p = 0.25, beta = 0.261, N = 235

**GFSLSDVPQAEISGEHLR pc3  
P35052**

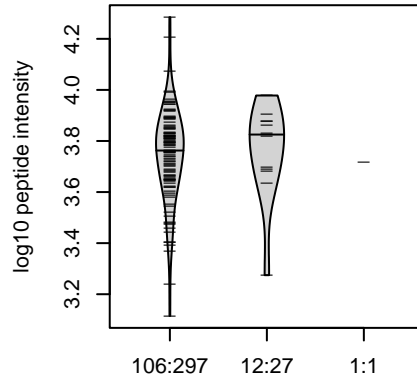

2:241405479:C:T\_T  
p = 0.38, beta = 0.224, N = 119

**VAQVPLGPECSR pc2  
H7C410;P35052**

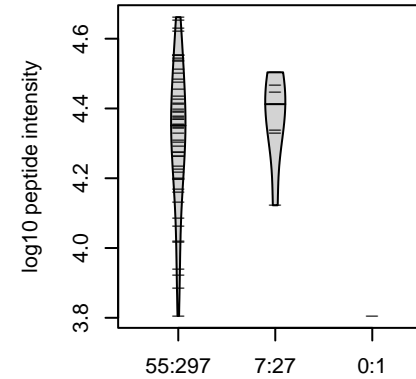

2:241405479:C:T\_T  
p = 0.93, beta = 0.0354, N = 62

Assay Target: GPC1  
Olink UniProt: P35052  
deCODE rsID: rs1126920  
Proxy rsID: rs1126920  
deCODE: 2:240466062:T:C  
Proxy SNP: 2:241405479:C:T  
deCODE log10(p): 475.1  
deCODE BETA: 0.63  
-----NA:NA  
1190:1147:940:913:582:472:319

**ADAMTS5 : NP1  
Q9UNA0**

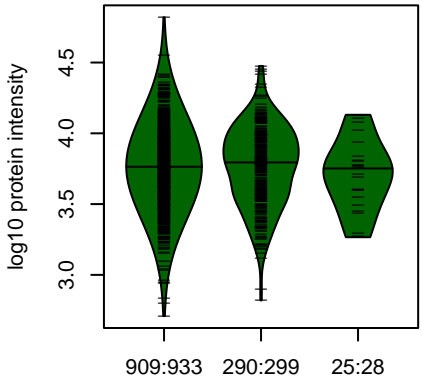

21:28311572:T:C\_T  
p = 0.89, beta = 0.00811, N = 1224

**FLLDLR pc2  
Q9UNA0**

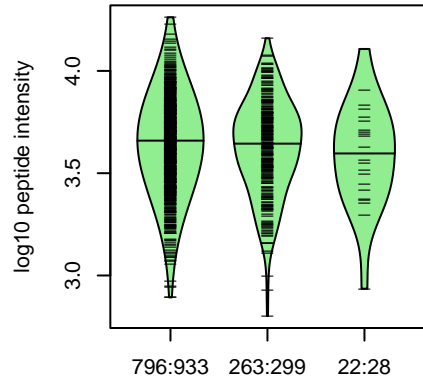

21:28311572:T:C\_T  
p = 0.35, beta = -0.0568, N = 1081

**AEPGHPHPLAQR pc3  
Q9UNA0**

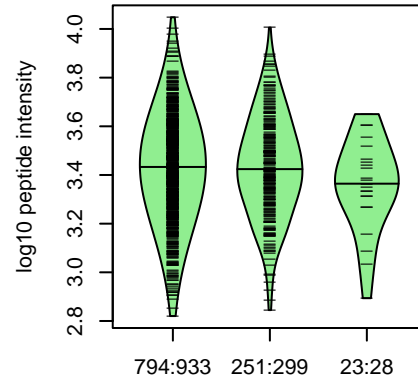

21:28311572:T:C\_T  
p = 0.9, beta = 0.0077, N = 1068

**GLVQNIDQLYSGGGK pc2  
Q9UNA0**

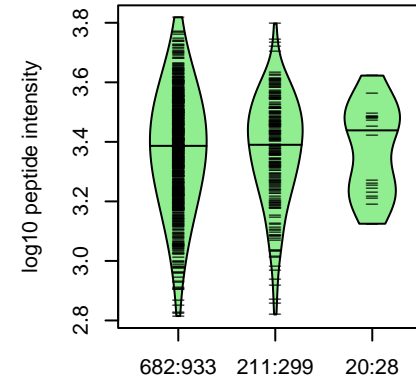

21:28311572:T:C\_T  
p = 0.92, beta = 0.00685, N = 913

**VGYLVIYAGGR pc2  
Q9UNA0**

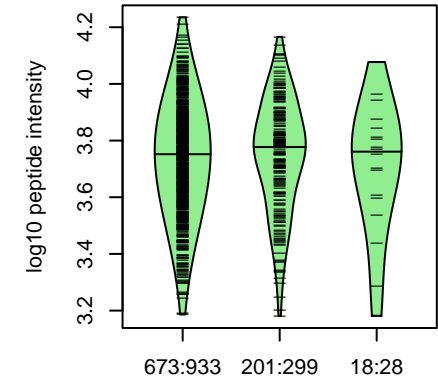

21:28311572:T:C\_T  
p = 0.62, beta = 0.0338, N = 892

**ADAMTS5 : NP1  
Q9UNA0**

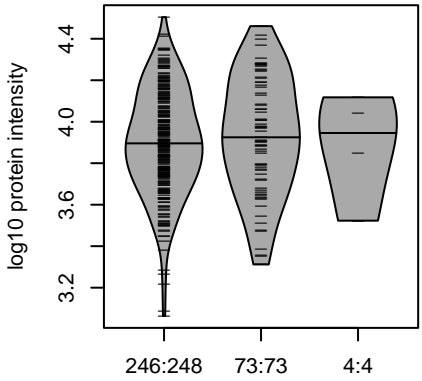

21:28311572:T:C\_T  
p = 0.64, beta = 0.0565, N = 323

**AEPGHPHPLAQR pc3  
Q9UNA0**

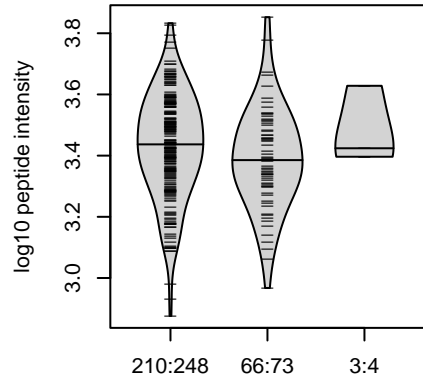

21:28311572:T:C\_T  
p = 0.085, beta = -0.22, N = 279

**VGYLVIYAGGR pc2  
Q9UNA0**

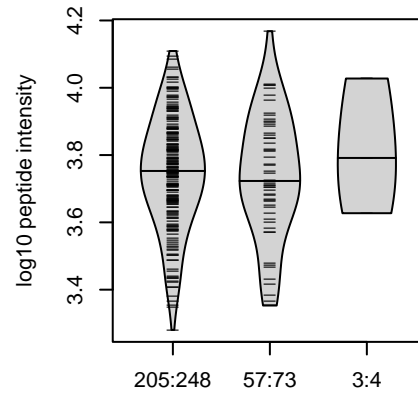

21:28311572:T:C\_T  
p = 0.73, beta = -0.0464, N = 265

**FLLDLR pc2  
Q9UNA0**

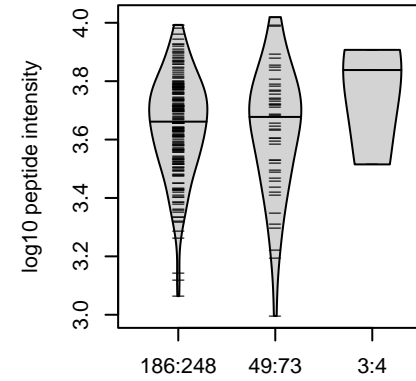

21:28311572:T:C\_T  
p = 0.72, beta = -0.05, N = 238

**GLVQNIDQLYSGGGK pc2  
Q9UNA0**

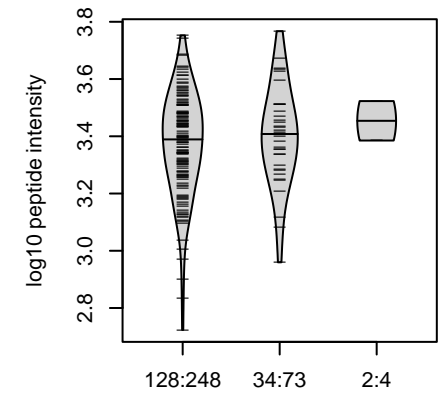

21:28311572:T:C\_T  
p = 0.64, beta = 0.0784, N = 164

Assay Target: ADAMTS5  
Olink UniProt: Q9UNA0  
deCODE rsID: rs151058  
Proxy rsID: rs151058  
deCODE: 21:26939253:T:C  
Proxy SNP: 21:28311572:T:C  
deCODE log10(p): 469  
deCODE BETA: -0.56  
-----  
1081:1068:913:892:364:140

**SERPINA4 : NP4  
P29622**

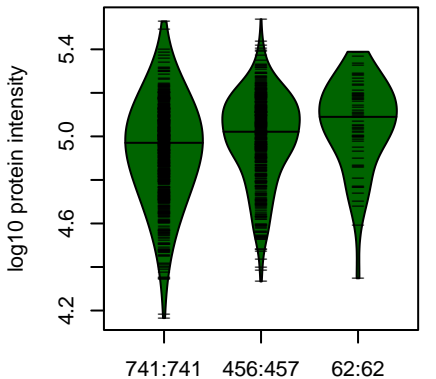

14:95033595:A:T\_T  
p = 3.4e-10, beta = 0.297, N = 1259

**GDATVFFILPNQ GK pc2  
P29622**

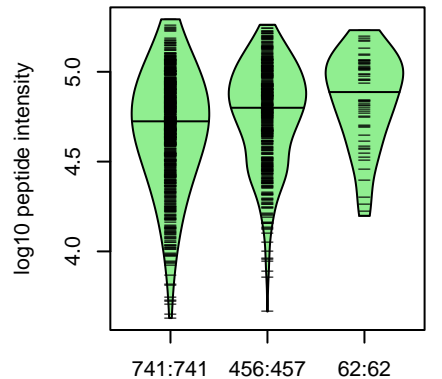

14:95033595:A:T\_T  
p = 6.2e-09, beta = 0.275, N = 1259

**LGFTDLFSK pc2  
P29622**

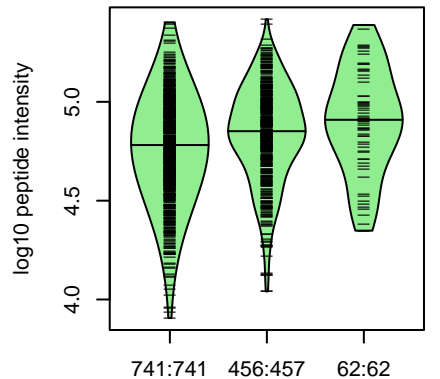

14:95033595:A:T\_T  
p = 2.5e-09, beta = 0.282, N = 1259

**WADLSGITK pc2  
P29622**

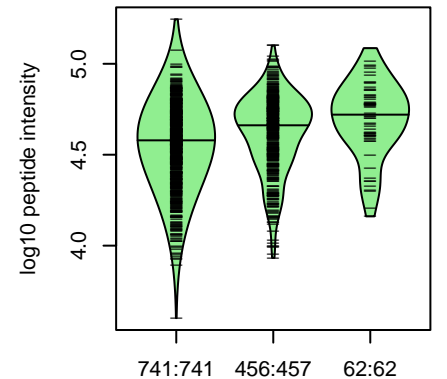

14:95033595:A:T\_T  
p = 9.2e-12, beta = 0.322, N = 1259

**FFSAQTNR pc2  
P29622**

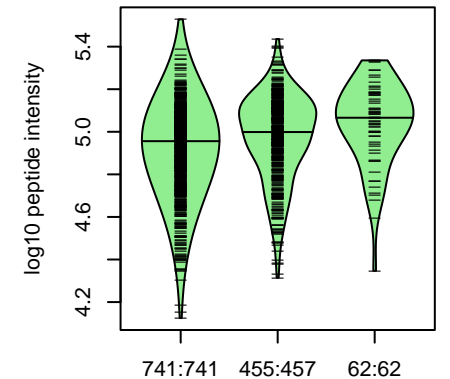

14:95033595:A:T\_T  
p = 5.8e-10, beta = 0.293, N = 1258

**SERPINA4 : NP4  
P29622**

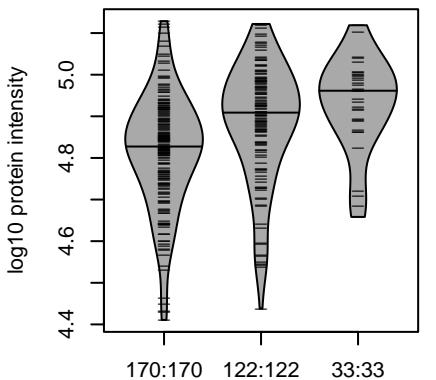

14:95033595:A:T\_T  
p = 5.4e-08, beta = 0.436, N = 325

**FFSAQTNR pc2  
P29622**

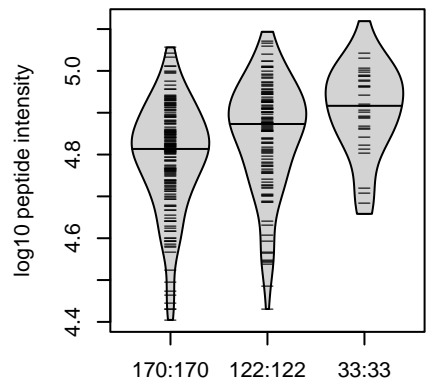

14:95033595:A:T\_T  
p = 1.9e-08, beta = 0.45, N = 325

**FSISGSYVLDQILPR pc2  
P29622**

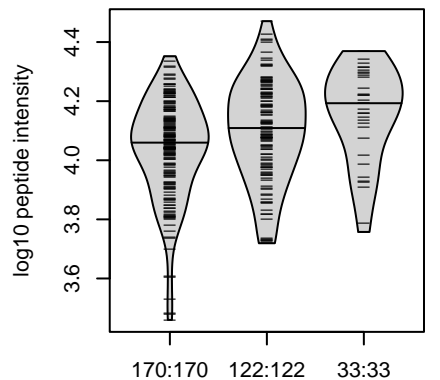

14:95033595:A:T\_T  
p = 1.6e-05, beta = 0.349, N = 325

**IAPANADFAFR pc2  
P29622**

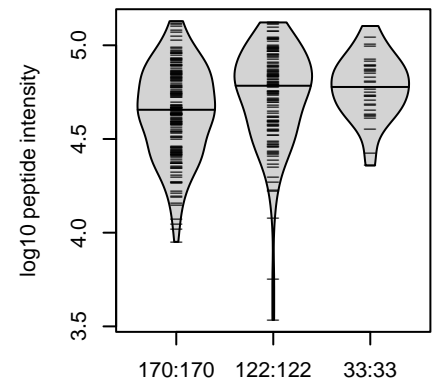

14:95033595:A:T\_T  
p = 0.00048, beta = 0.284, N = 325

**IVDLVSELK pc2  
P29622**

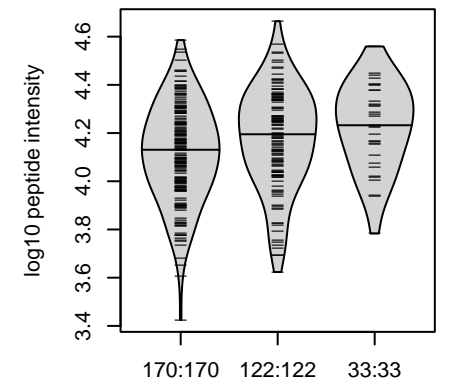

14:95033595:A:T\_T  
p = 0.0013, beta = 0.262, N = 325

Assay Target: SERPINA4  
Olink UniProt: P29622  
deCODE rsID: rs5511  
Proxy rsID: rs5511  
deCODE: 14:94567258:T:A  
Proxy SNP: 14:95033595:A:T  
deCODE log10(p): 465.8  
deCODE BETA: 0.45  
\*\*\*\*\*  
1259:1259:1259:1258:1258:125

**CD55 : NP1  
P08174-5**

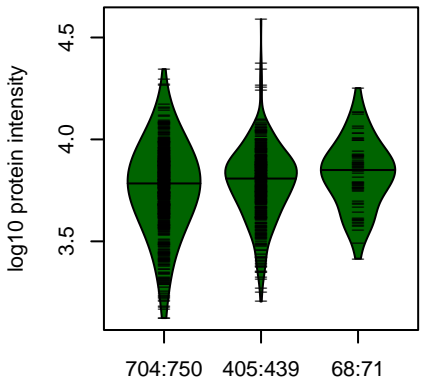

1:207421214:G:A\_A  
p = 0.0016, beta = 0.152, N = 1177

**LTCLQLNK pc2**

AP13;P08174;P08174-2;P08174-3;P0AP13;P08174;P08174-2;P08174-3;P03;B1AP15;P08174;P08174-2;P08174-AP13;P08174;P08174-2;P08174-3;P0

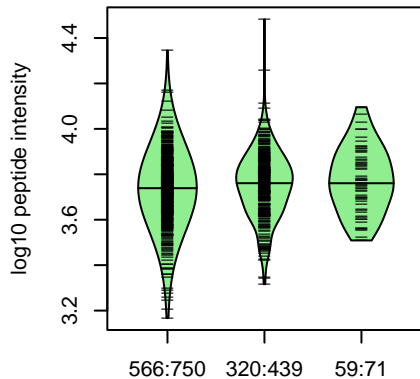

1:207421214:G:A\_A  
p = 0.022, beta = 0.121, N = 945

**WSTAVEFCK pc2**

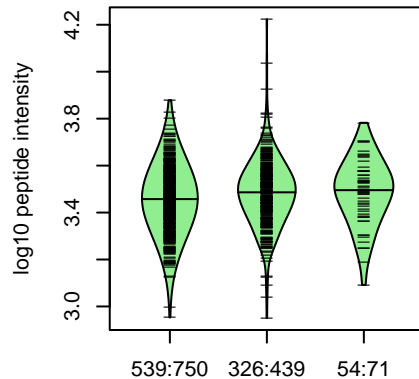

1:207421214:G:A\_A  
p = 0.0044, beta = 0.154, N = 919

**QSVTYACNK pc2**

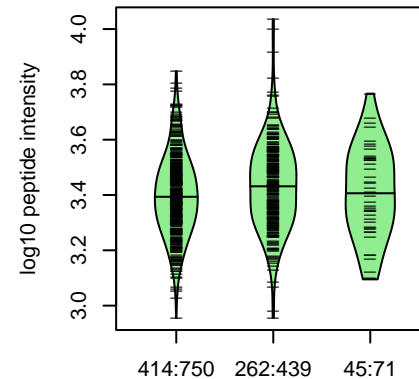

1:207421214:G:A\_A  
p = 0.02, beta = 0.141, N = 721

**SCEVPTR pc2**

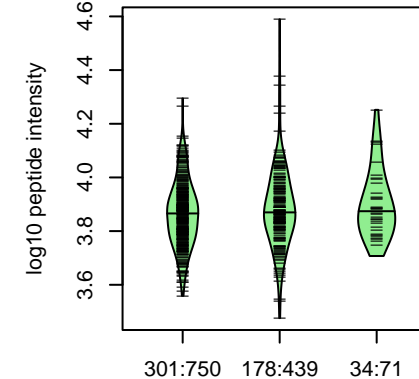

1:207421214:G:A\_A  
p = 0.063, beta = 0.131, N = 513

**CD55 : NP1  
P08174-5**

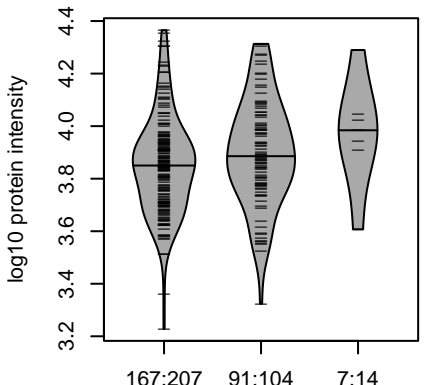

1:207421214:G:A\_A  
p = 0.017, beta = 0.267, N = 265

**LTCLQLNK pc2**

AP13;P08174;P08174-2;P08174-3;P0AP13;P08174;P08174-2;P08174-3;P0AP13;P08174;P08174-2;P08174-3;P03;B1AP15;P08174;P08174-2;P08174-

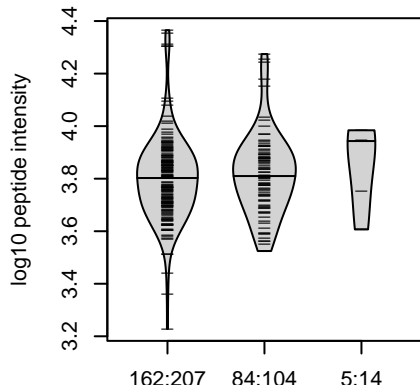

1:207421214:G:A\_A  
p = 0.21, beta = 0.149, N = 251

**SCEVPTR pc2**

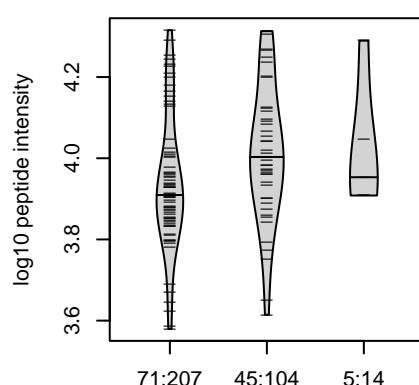

1:207421214:G:A\_A  
p = 0.0077, beta = 0.405, N = 121

**WSTAVEFCK pc2**

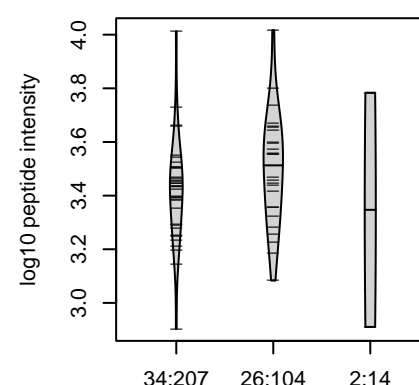

1:207421214:G:A\_A  
p = 0.46, beta = 0.162, N = 62

**TSFPEDTVITYK pc2**

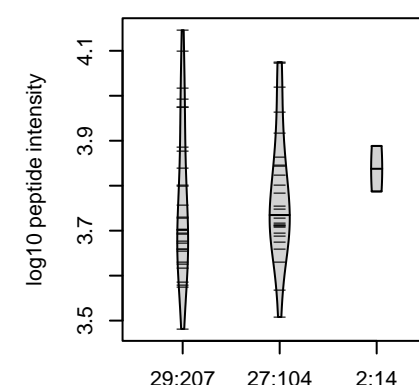

1:207421214:G:A\_A  
p = 0.75, beta = 0.0717, N = 58

Assay Target: CD55  
Olink UniProt: P08174  
deCODE rsID: rs61822669  
Proxy rsID: rs61822669  
deCODE: 1:207247869:A:G  
Proxy SNP: 1:207421214:G:A  
deCODE log10(p): 433.9  
deCODE BETA: -0.41  
-.\*:-.-:-.\*:-  
945:919:721:513:406:389:366:5



**SERPINA1 : NP4  
P01009**

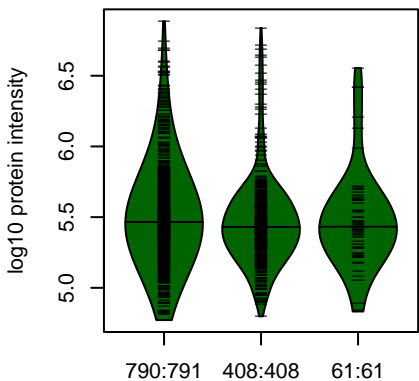

14:94841641:G:A\_A  
 $p = 0.15$ ,  $\beta = -0.07$ ,  $N = 1259$

**FLEDVKK pc2  
P01009-2;P01009-3;P01009**

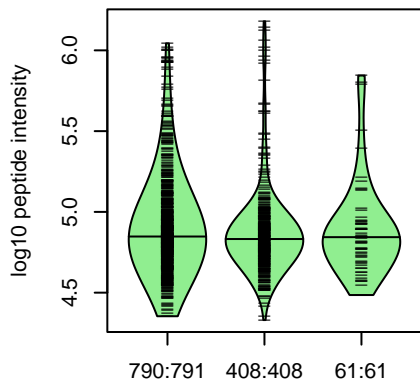

14:94841641:G:A\_A  
 $p = 0.46$ ,  $\beta = -0.0356$ ,  $N = 1259$

**LYHSEFTVNFQDTEEA pc3  
P01009-2;P01009-3;P01009**

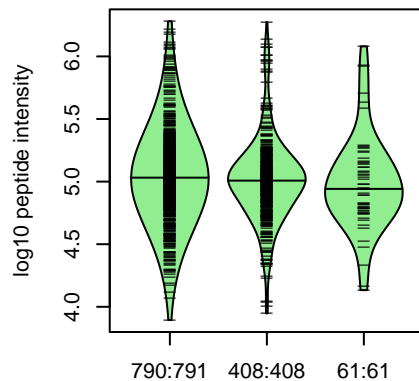

14:94841641:G:A\_A  
 $p = 0.12$ ,  $\beta = -0.0742$ ,  $N = 1259$

**SVLGQLGITK pc2  
P01009-2;P01009**

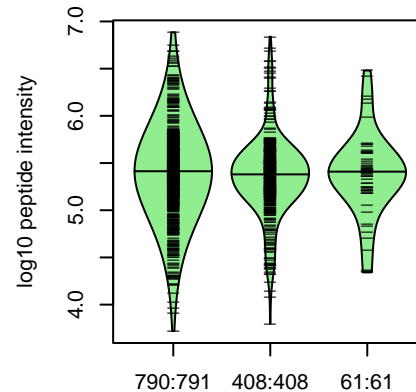

14:94841641:G:A\_A  
 $p = 0.33$ ,  $\beta = -0.0465$ ,  $N = 1259$

**VFSNGADLSGVTEEA PLK pc2  
P01009-2;P01009**

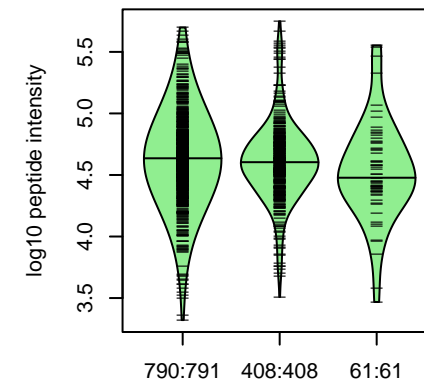

14:94841641:G:A\_A  
 $p = 0.033$ ,  $\beta = -0.102$ ,  $N = 1259$

**SERPINA1 : NP4  
P01009**

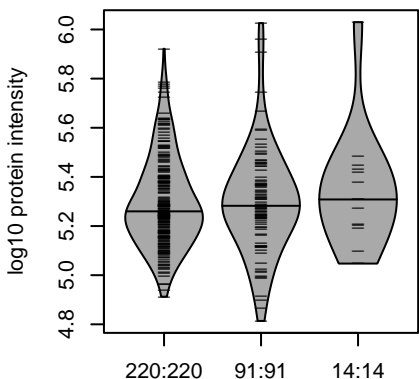

14:94841641:G:A\_A  
 $p = 0.63$ ,  $\beta = 0.0472$ ,  $N = 325$

**LGMFNIQHCK pc3  
P01009-2;P01009-3;P01009**

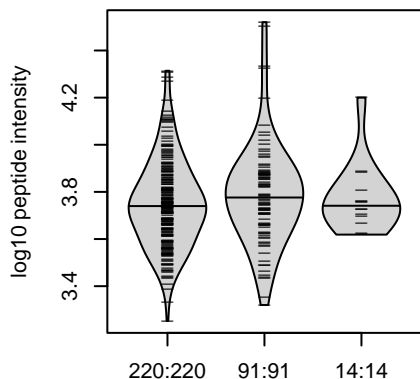

14:94841641:G:A\_A  
 $p = 0.2$ ,  $\beta = 0.124$ ,  $N = 325$

**LQHLENELTHDIITK pc3  
P01009-2;P01009-3;P01009**

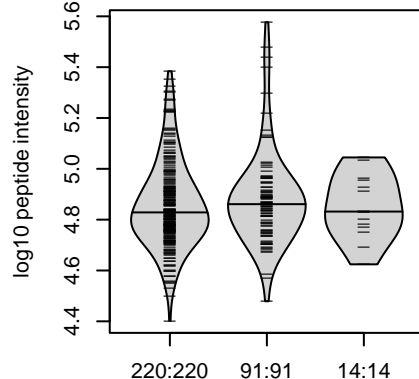

14:94841641:G:A\_A  
 $p = 0.47$ ,  $\beta = 0.0707$ ,  $N = 325$

**LSSWVLLMK pc2  
P01009-2;P01009-3;P01009**

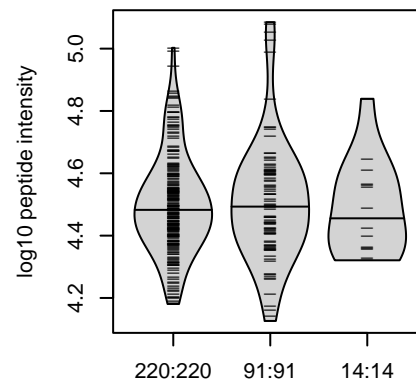

14:94841641:G:A\_A  
 $p = 0.98$ ,  $\beta = -0.00264$ ,  $N = 325$

**LYHSEFTVNFQDTEEA pc3  
P01009-2;P01009-3;P01009**

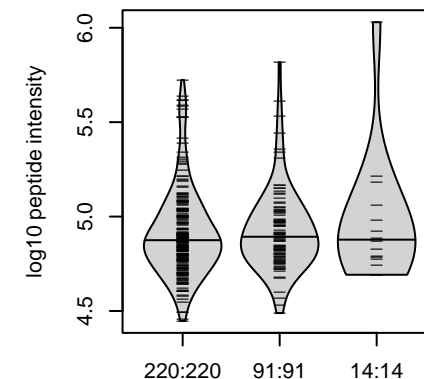

14:94841641:G:A\_A  
 $p = 0.2$ ,  $\beta = 0.126$ ,  $N = 325$

Assay Target: SERPINA1  
Olink UniProt: P01009  
deCODE rsID: rs1243167  
Proxy rsID: rs1243167  
deCODE: 14:94375304:A:G  
Proxy SNP: 14:94841641:G:A  
deCODE log10(p): 420.5  
deCODE BETA: 0.41  
-----  
1259:1259:1259:1259:1258:125

**DTEEEDFHVDQATTVK pc2  
rs6647 ALT**

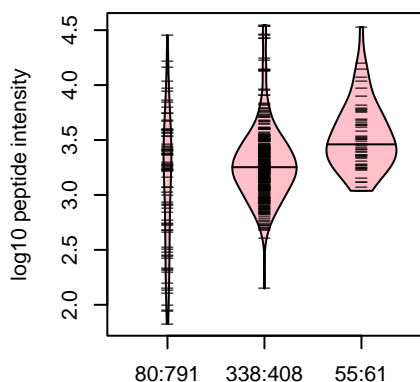

14:94841641:G:A\_A  
 $p = 4.6e-161$ , model = REC,  $N = 473$

**DTEEEDFHVDQATTVK pc3  
rs6647 ALT**

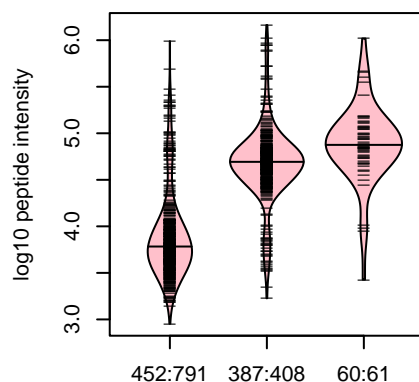

14:94841641:G:A\_A  
 $p = 3.9e-56$ , model = REC,  $N = 899$

**DTEEEDFHVDQVTTVK pc2  
rs6647 REF**

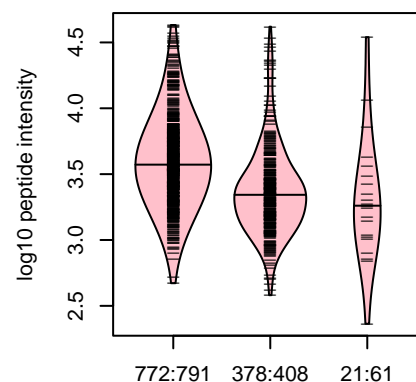

14:94841641:G:A\_A  
 $p = 2.6e-35$ , model = DOM,  $N = 1171$

**FNKPFVFLMIDQNTK pc3  
rs1303 ALT**

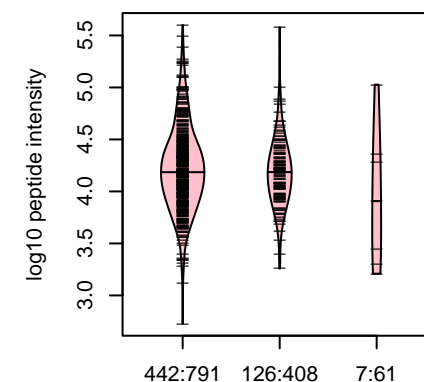

14:94841641:G:A\_A  
 $p = 1.3e-21$ , model = REC,  $N = 575$

CYTL1 : NP2  
Q9NRR1

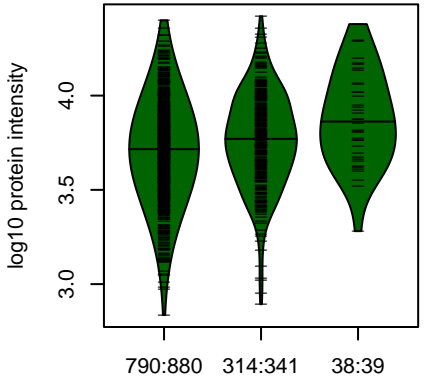

4:5026641:A:C\_C  
 $p = 1.8e-06$ ,  $\beta = 0.26$ ,  $N = 1142$

LYLDIHNYCVLDK pc3  
Q9NRR1

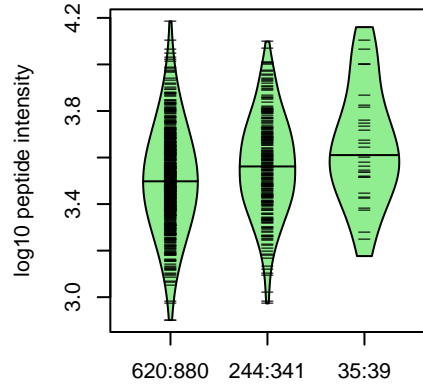

4:5026641:A:C\_C  
 $p = 3.5e-07$ ,  $\beta = 0.304$ ,  $N = 899$

ALSQEITR pc2  
Q9NRR1

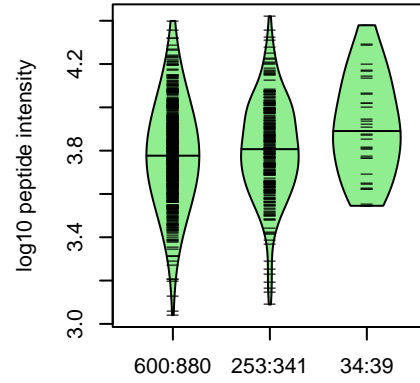

4:5026641:A:C\_C  
 $p = 0.0021$ ,  $\beta = 0.185$ ,  $N = 887$

LYTIMNSFCR pc2  
Q9NRR1

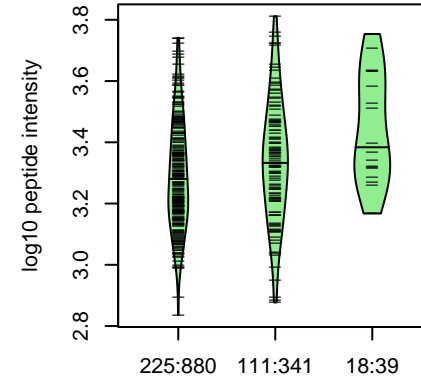

4:5026641:A:C\_C  
 $p = 0.0012$ ,  $\beta = 0.289$ ,  $N = 354$

DFNLLQVSEPCVR pc2  
Q9NRR1

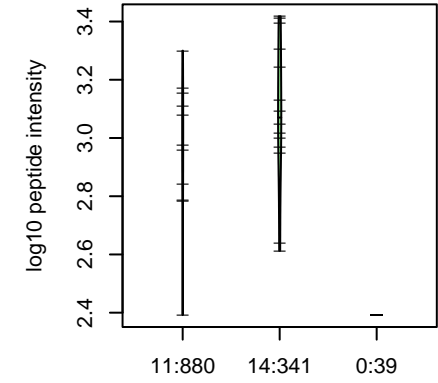

4:5026641:A:C\_C  
 $p = 0.59$ ,  $\beta = 0.202$ ,  $N = 25$

Assay Target: CYTL1  
Olink UniProt: Q9NRR1  
deCODE rsID: rs9998211  
Proxy rsID: rs9998211  
deCODE: 4:5024914:C:!  
Proxy SNP: 4:5026641:A:C  
deCODE log10(p): 411.7  
deCODE BETA: 0.45  
\*\*\*-  
899:887:354:25

**KNG1 : NP4**  
**P01042**

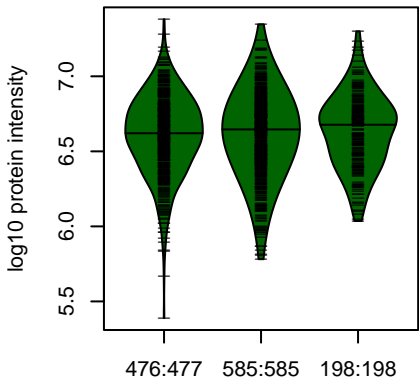

3:186454180:A:C\_C  
p = 0.31, beta = 0.0411, N = 1259

**DFVQPPTK pc2**  
**P01042;P01042-2;P01042-3**

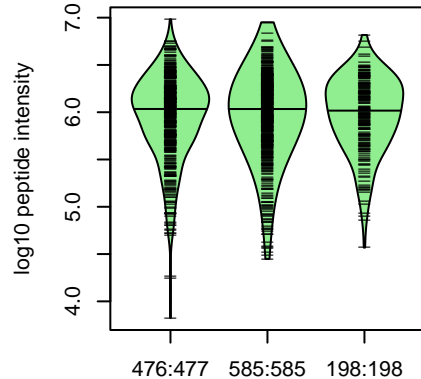

3:186454180:A:C\_C  
p = 0.58, beta = 0.0225, N = 1259

**DIPTNSPELEETLHTITK pc3**  
**P01042;P01042-2;P01042-3**

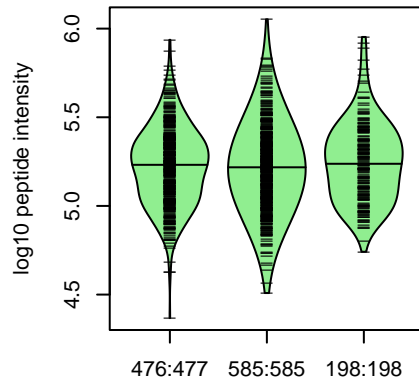

3:186454180:A:C\_C  
p = 0.5, beta = 0.0274, N = 1259

**ENFLFLTPDCK pc2**  
**P01042;P01042-2**

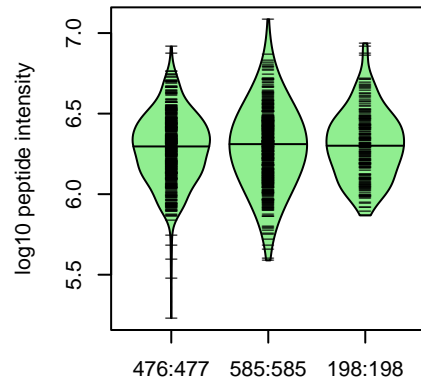

3:186454180:A:C\_C  
p = 0.26, beta = 0.0458, N = 1259

**ESNEELTESCETK pc2**  
**P01042;P01042-2;P01042-3**

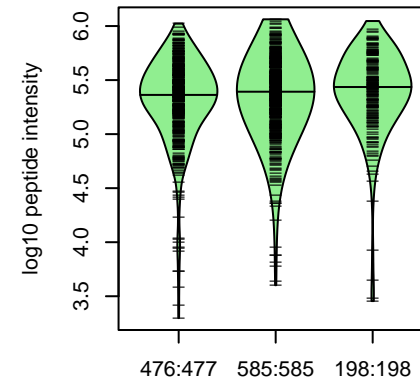

3:186454180:A:C\_C  
p = 0.021, beta = 0.0931, N = 1259

**KNG1 : NP4**  
**P01042**

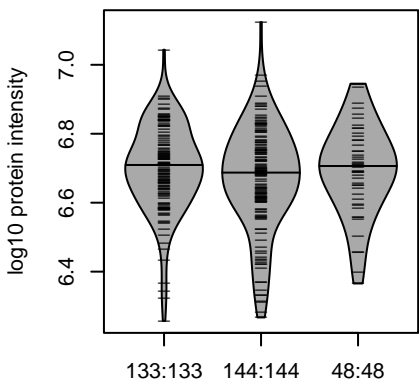

3:186454180:A:C\_C  
p = 0.59, beta = -0.0428, N = 325

**AATGECTATVVGK pc2**  
**P01042;P01042-2;P01042-3**

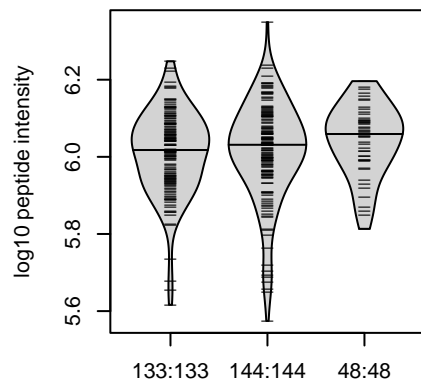

3:186454180:A:C\_C  
p = 0.12, beta = 0.122, N = 325

**AGAEPASEREVS pc2**  
**P01042-2;P01042-3**

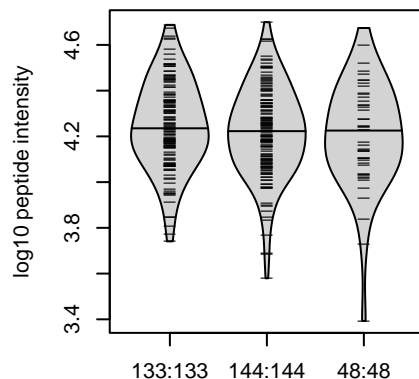

3:186454180:A:C\_C  
p = 0.11, beta = -0.125, N = 325

**DFVQPPTK pc2**  
**P01042;P01042-2;P01042-3**

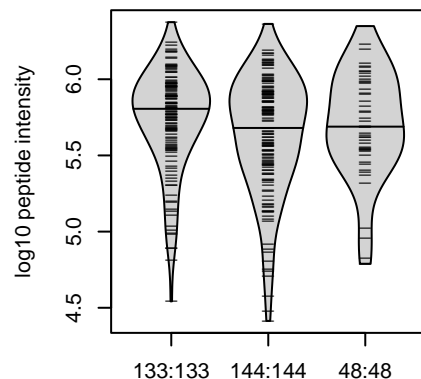

3:186454180:A:C\_C  
p = 0.3, beta = -0.0813, N = 325

**EETSHLR pc2**  
**P01042-2;P01042-3**

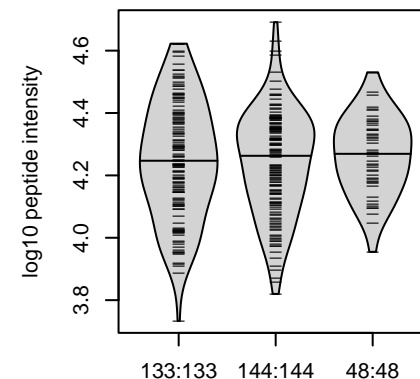

3:186454180:A:C\_C  
p = 0.96, beta = 0.00345, N = 325

**ITYSIVQTNSK pc2**  
**rs2304456 REF**

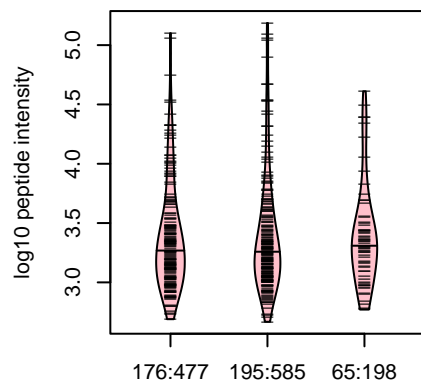

3:186454180:A:C\_C  
p = 0.2, model = REC, N = 436

**ITYSIVQTNSKENFLFLTPDCK pc4**  
**rs2304456 REF**

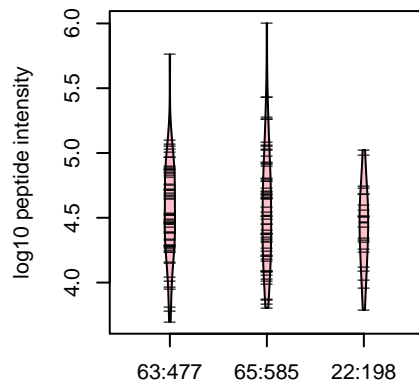

3:186454180:A:C\_C  
p = 0.28, model = REC, N = 150

**MTYSIVQTNSK pc2**  
**rs2304456 ALT**

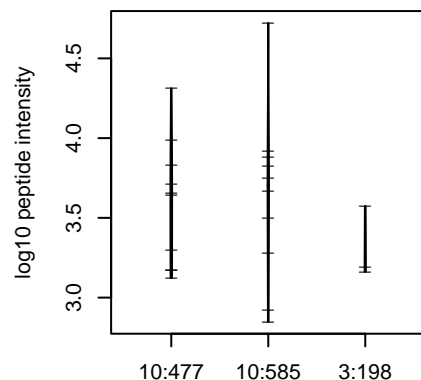

3:186454180:A:C\_C  
p = 0.67, model = REC, N = 23

**HGIQYFNNNTQHSSLFMLNEVK pc2**  
**rs1656922 REF**

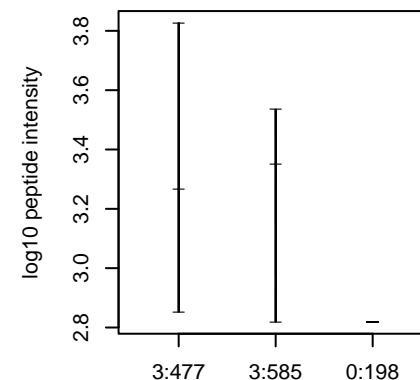

3:186454180:A:C\_C  
p = NA, model = NA, N = 6

Assay Target: KNG1  
Olink UniProt: P01042  
deCODE rsID: rs5030062  
Proxy rsID: rs5030062  
deCODE: 3:186736391:C:A  
Proxy SNP: 3:186454180:A:C  
deCODE log10(p): 399.7  
deCODE BETA: 0.36  
-----  
1259:1259:1259:1259:1259:125

**F13B : NP5  
P05160**

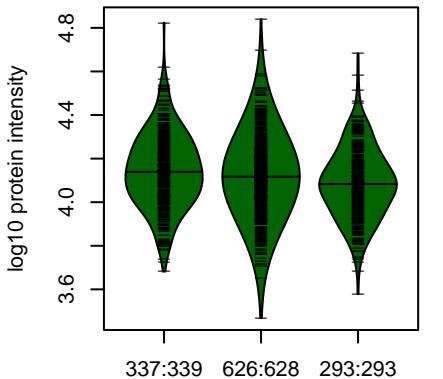

1:197023048:G:A\_A  
p = 8.7e-05, beta = -0.155, N = 1256

**VLHGDILDFVCK pc3  
P05160**

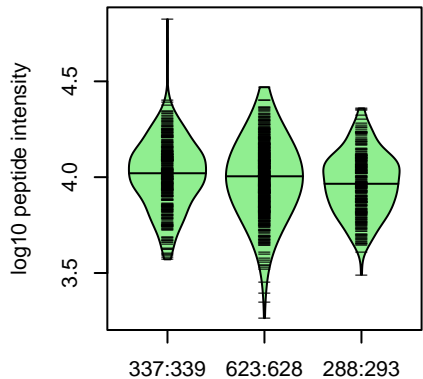

1:197023048:G:A\_A  
p = 0.0016, beta = -0.125, N = 1248

**SFYFPM SIDK pc2  
P05160**

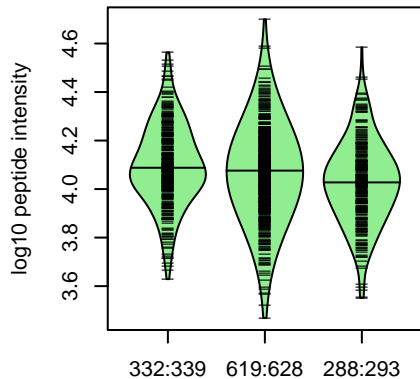

1:197023048:G:A\_A  
p = 4.2e-06, beta = -0.184, N = 1239

**SGYLLHGSNEITCNR pc3  
P05160**

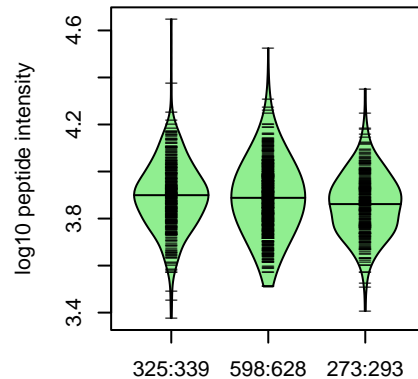

1:197023048:G:A\_A  
p = 0.008, beta = -0.108, N = 1196

**VACEEPPFIENGAANLHSK pc3  
P05160**

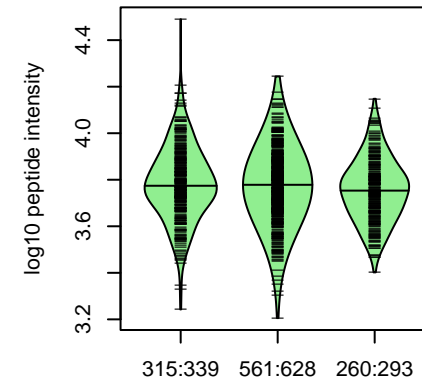

1:197023048:G:A\_A  
p = 0.075, beta = -0.0741, N = 1136

**F13B : NP5  
P05160**

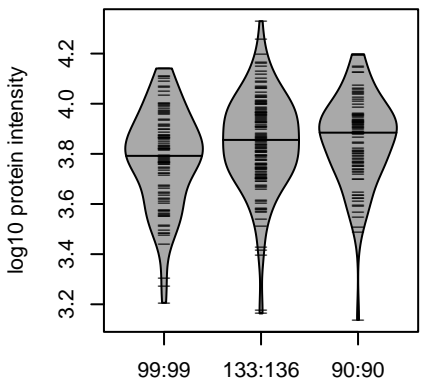

1:197023048:G:A\_G  
p = 0.044, beta = 0.144, N = 322

**VLHGDILDFVCK pc3  
P05160**

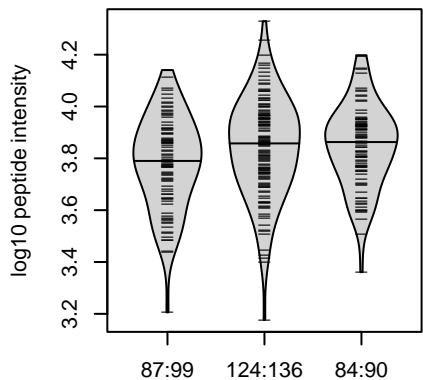

1:197023048:G:A\_G  
p = 0.072, beta = 0.136, N = 295

**LIENGYFHPVK pc3  
P05160**

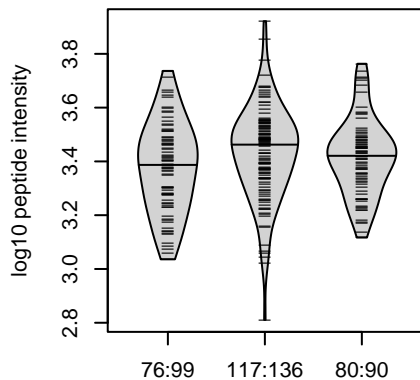

1:197023048:G:A\_G  
p = 0.35, beta = 0.0745, N = 273

**SFYFPM SIDK pc2  
P05160**

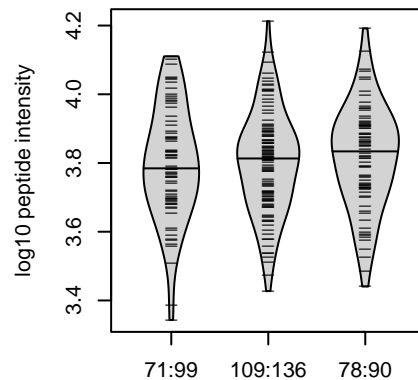

1:197023048:G:A\_G  
p = 0.68, beta = 0.0334, N = 258

**SGYLLHGSNEITCNR pc3  
P05160**

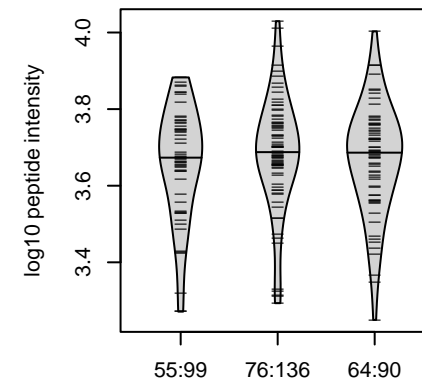

1:197023048:G:A\_G  
p = 0.91, beta = 0.0107, N = 195

**IQENMHYGCASGYK pc3  
rs6003 ALT**

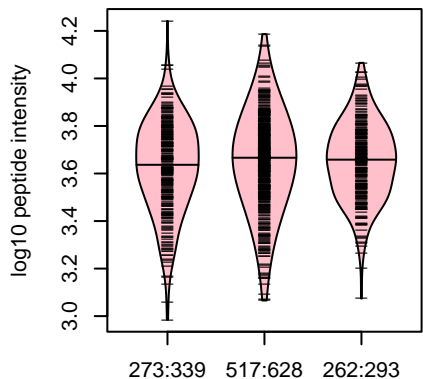

1:197023048:G:A\_A  
p = 0.0016, model = DOM, N = 1052

Assay Target: F13B  
Olink UniProt: P05160  
deCODE rsID: rs1412635  
Proxy rsID: rs1412635  
deCODE 1:197053918:A:G  
Proxy SNP: 1:197023048:G:A  
deCODE log10(p): 393.6  
deCODE BETA: -0.34  
\*\*\*:\*\*\*:\*\*\*:\*\*\*:\*\*\*:\*\*\*  
1248:1239:1196:1136:1086:106



**IGLL1 : NP4  
P15814**

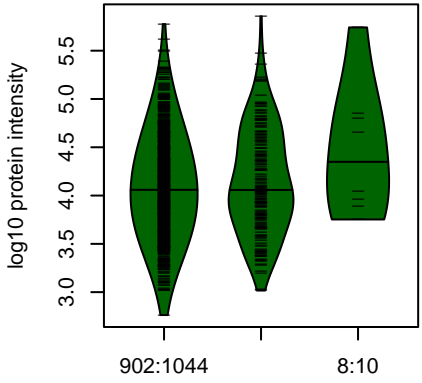

22:23922552:G:A\_A  
p = 0.099, beta = 0.125, N = 1082

**YAASSYLSLTPEQWR pc2  
P15814**

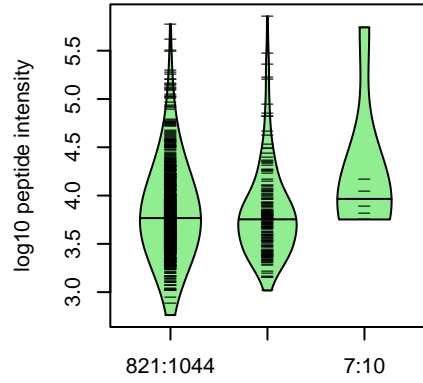

22:23922552:G:A\_A  
p = 0.97, beta = 0.00279, N = 983

**ATPSVTLFPPSSEELQANK pc3  
P15814**

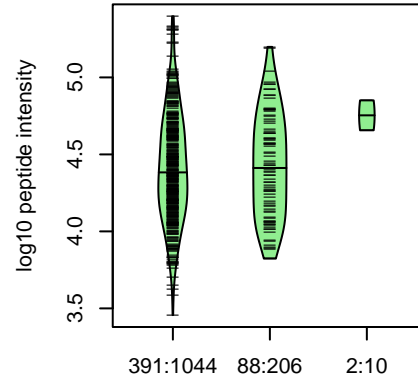

22:23922552:G:A\_A  
p = 0.52, beta = 0.0721, N = 481

**SYSCQVMHEGSTVEK pc3  
P15814**

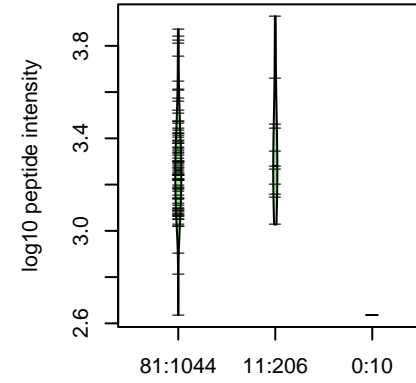

22:23922552:G:A\_A  
p = 0.46, beta = 0.231, N = 92

**IGLL1 : NP4  
P15814**

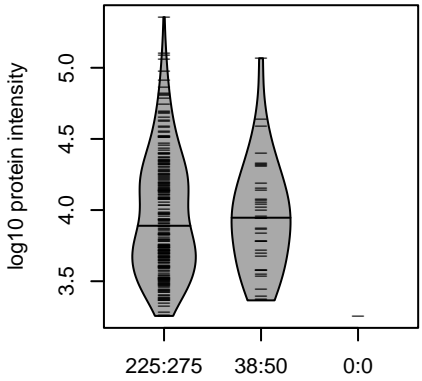

22:23922552:G:A\_A  
p = 0.85, beta = -0.0317, N = 263

**YAASSYLSLTPEQWR pc2  
P15814**

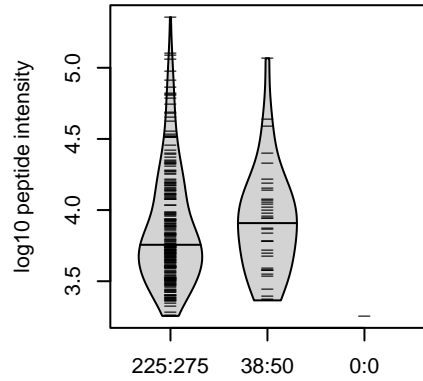

22:23922552:G:A\_A  
p = 0.49, beta = 0.119, N = 263

Assay Target: IGLL1  
Olink UniProt: P15814  
deCODE rsID: rs9624216  
Proxy rsID: rs9624216  
deCODE: 22:23580365:A:G  
Proxy SNP: 22:23922552:G:A  
deCODE log10(p): 374.6  
deCODE BETA: -0.6  
-:-:-:-  
983:481:92:35

**DPT : NP2  
Q07507**

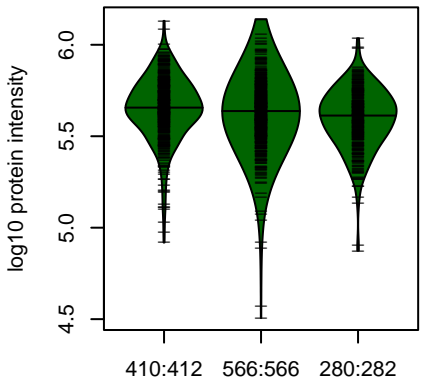

1:168697761:A:C\_A  
p = 3.2e-07, beta = -0.195, N = 1256

**GATTTFAVER pc2  
Q07507**

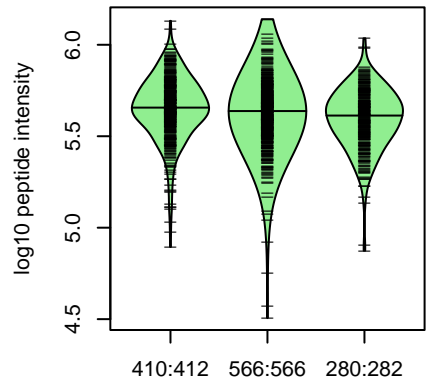

1:168697761:A:C\_A  
p = 3.3e-07, beta = -0.194, N = 1256

**AGMEWYQTCNNGLVAGFQSR pc:  
Q07507**

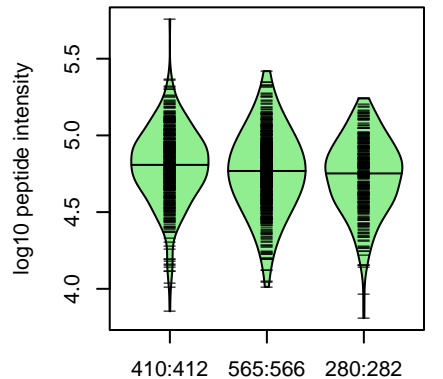

1:168697761:A:C\_A  
p = 0.00089, beta = -0.127, N = 1255

**QGFSYQCPQGQVIVAVR pc3  
Q07507**

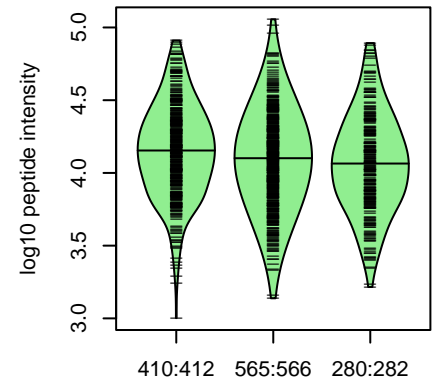

1:168697761:A:C\_A  
p = 0.00049, beta = -0.133, N = 1255

**YFESVLDR pc2  
Q07507**

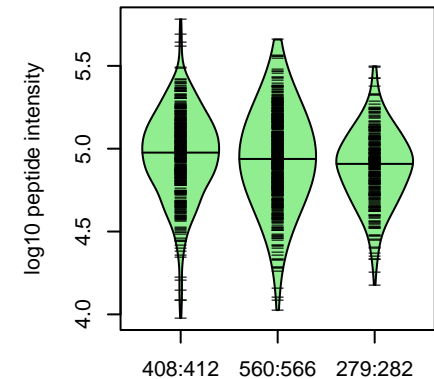

1:168697761:A:C\_A  
p = 0.00059, beta = -0.132, N = 1247

**DPT : NP2  
Q07507**

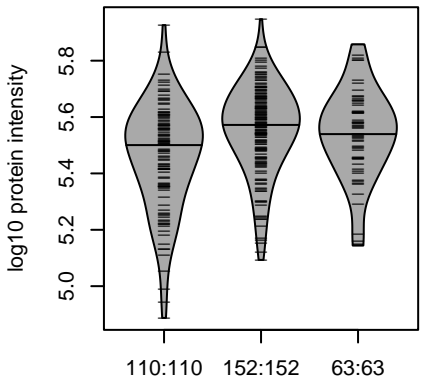

1:168697761:A:C\_C  
p = 0.0023, beta = 0.232, N = 325

**GATTTFAVER pc2  
Q07507**

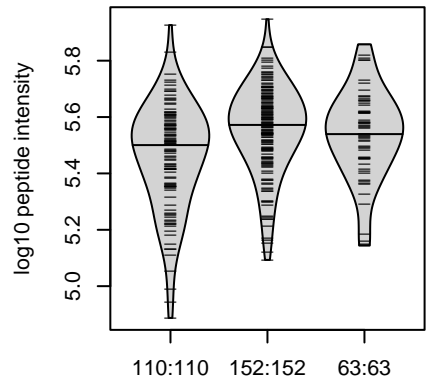

1:168697761:A:C\_C  
p = 0.0023, beta = 0.232, N = 325

**YFESVLDR pc2  
Q07507**

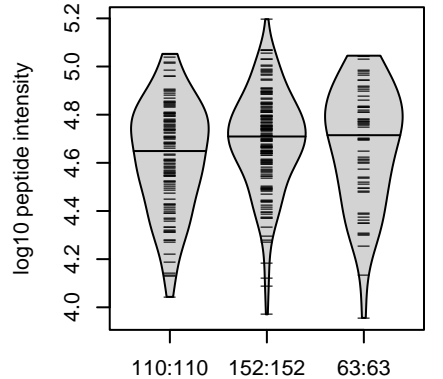

1:168697761:A:C\_C  
p = 0.083, beta = 0.133, N = 325

**QGFSYQCPQGQVIVAVR pc3  
Q07507**

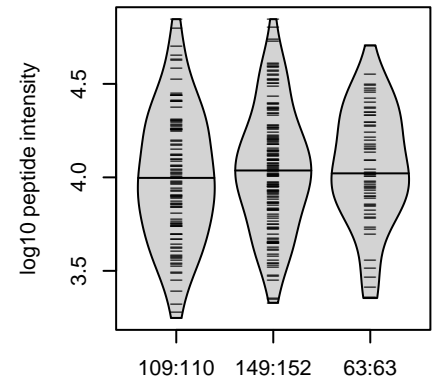

1:168697761:A:C\_C  
p = 0.32, beta = 0.0767, N = 321

**AGMEWYQTCNNGLVAGFQSR pc:  
Q07507**

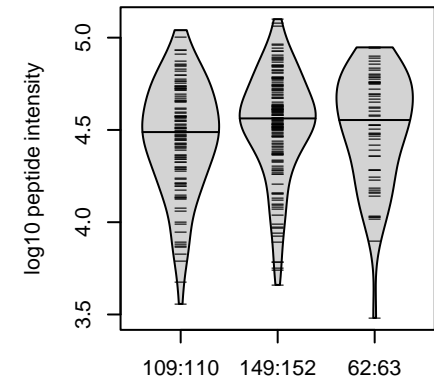

1:168697761:A:C\_C  
p = 0.1, beta = 0.126, N = 320

Assay Target: DPT  
Olink UniProt: Q07507  
deCODE rsID: rs1018454  
Proxy rsID: rs1018454  
deCODE: 1:168728523:A:C  
Proxy SNP: 1:168697761:A:C  
deCODE log10(p): 370  
deCODE BETA: -0.34  
\*.\*.\*.\*.-:-:-:-  
1256:1255:1255:1247:1169:858









**PDGFD : NP3**  
**Q9GZP0**

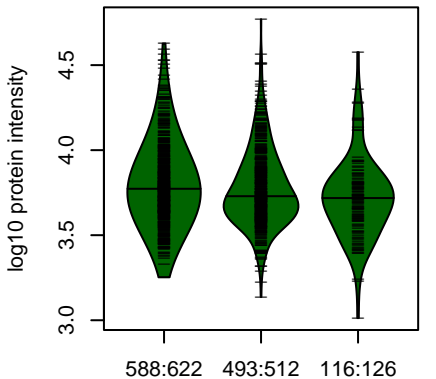

11:104031598:C:G\_G  
p = 4e-04, beta = -0.154, N = 1197

**LANVFFPR pc2**  
**Q9GZP0;Q9GZP0-2**

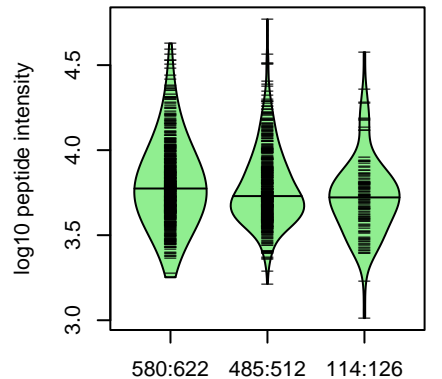

11:104031598:C:G\_G  
p = 0.00075, beta = -0.148, N = 1179

**YHEVLQFEPGHIK pc3**  
**Q9GZP0;Q9GZP0-2**

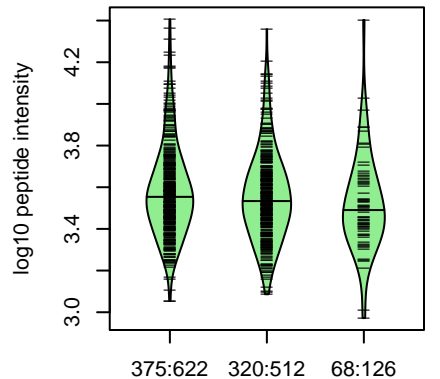

11:104031598:C:G\_G  
p = 0.026, beta = -0.124, N = 763

**TMALVDIQLDHER pc3**  
**Q9GZP0;Q9GZP0-2**

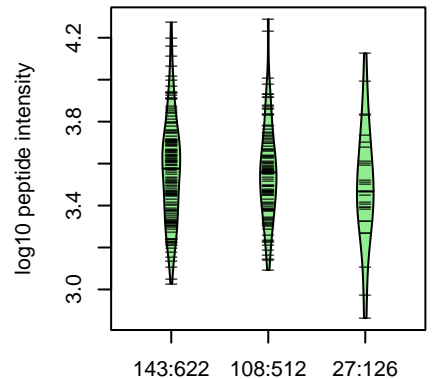

11:104031598:C:G\_G  
p = 0.38, beta = -0.0781, N = 278

**NLLLTWR pc2**  
**Q9GZP0;Q9GZP0-2**

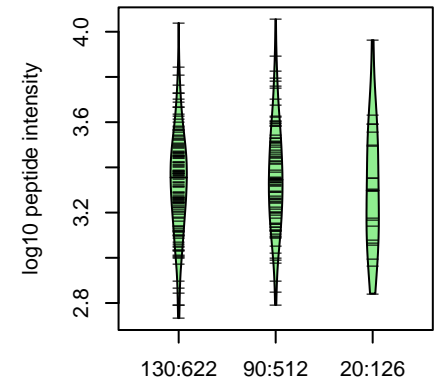

11:104031598:C:G\_G  
p = 0.88, beta = 0.0153, N = 240

**PDGFD : NP3**  
**Q9GZP0;Q9GZP0-2**

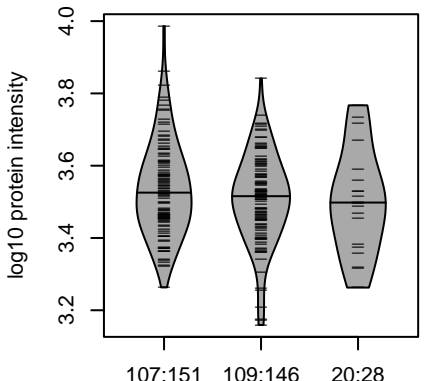

11:104031598:C:G\_G  
p = 0.16, beta = -0.143, N = 236

**LANVFFPR pc2**  
**Q9GZP0;Q9GZP0-2**

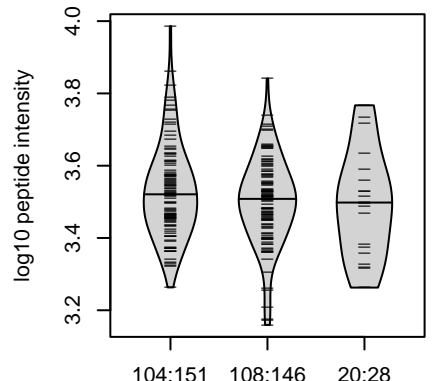

11:104031598:C:G\_G  
p = 0.11, beta = -0.161, N = 232

**YHEVLQFEPGHIK pc3**  
**Q9GZP0;Q9GZP0-2**

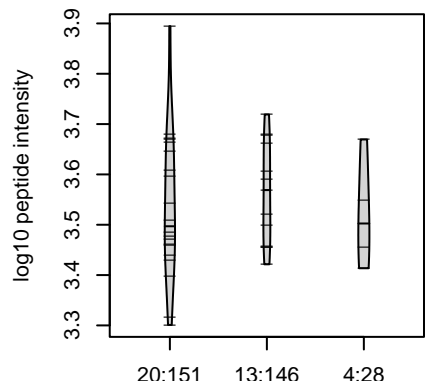

11:104031598:C:G\_G  
p = 0.49, beta = 0.157, N = 37

Assay Target: PDGFD  
Olink UniProt: Q9GZP0  
deCODE rsID: rs7950273  
Proxy rsID: rs7950273  
deCODE: 11:104160870:G:C  
Proxy SNP: 11:104031598:C:G  
deCODE log10(p): 342.9  
deCODE BETA: -0.35  
\*:-:-:-:NA:NA:NA:NA  
1179:763:278:240:198:8:7:13:3

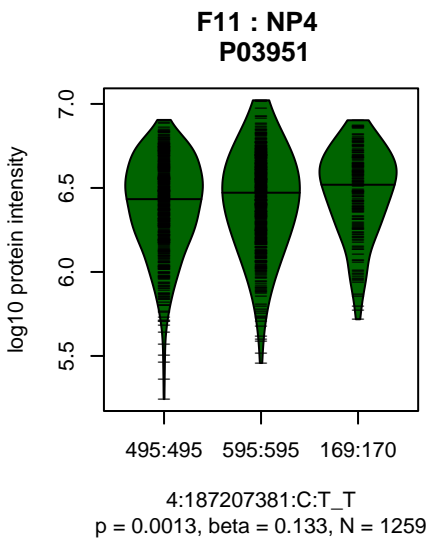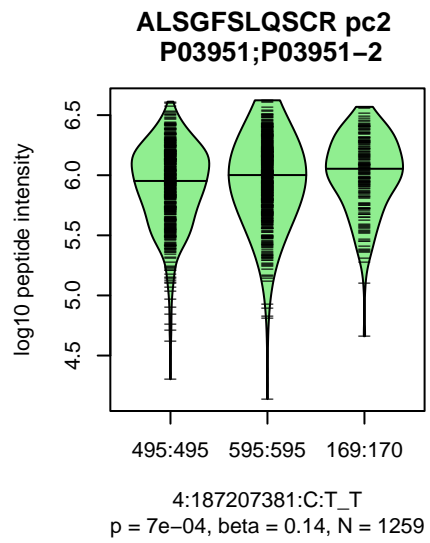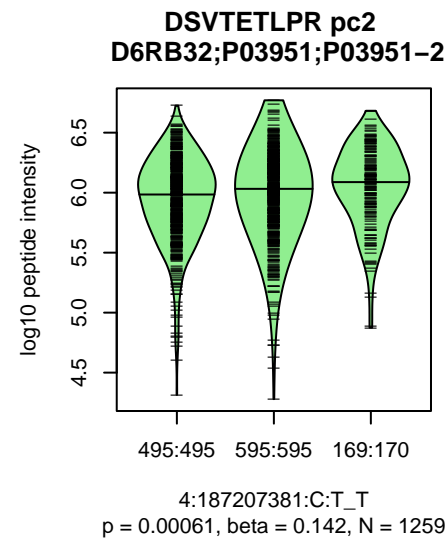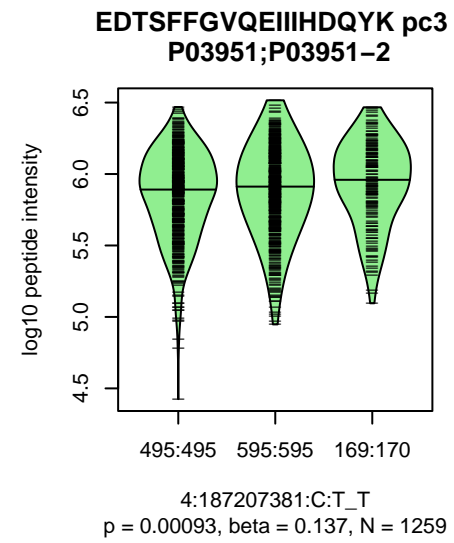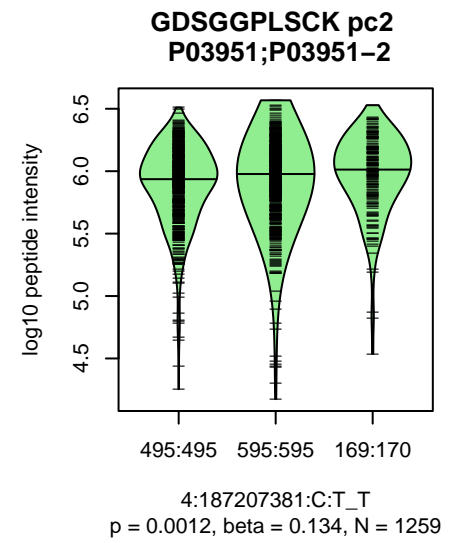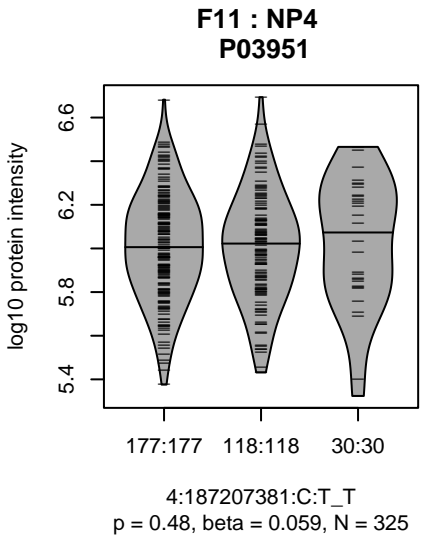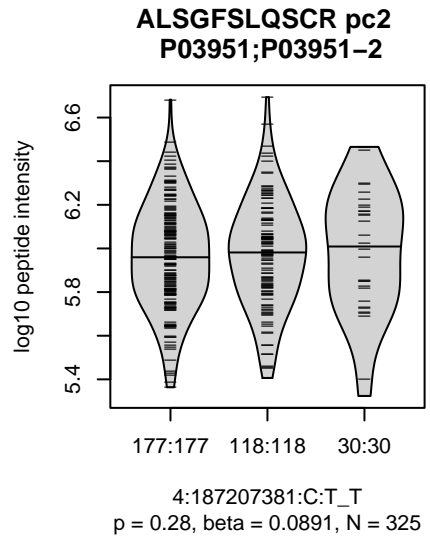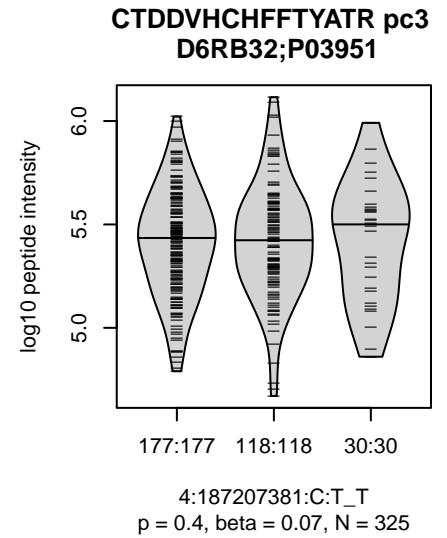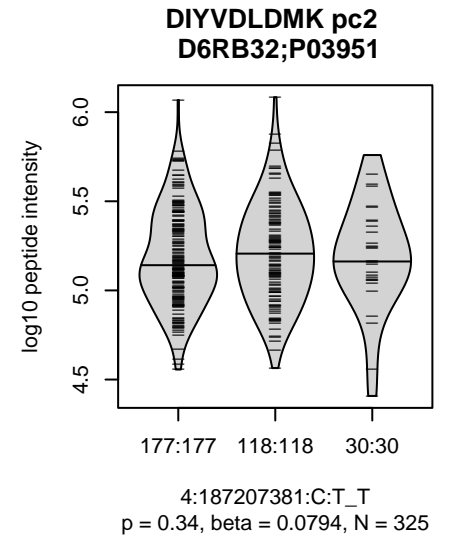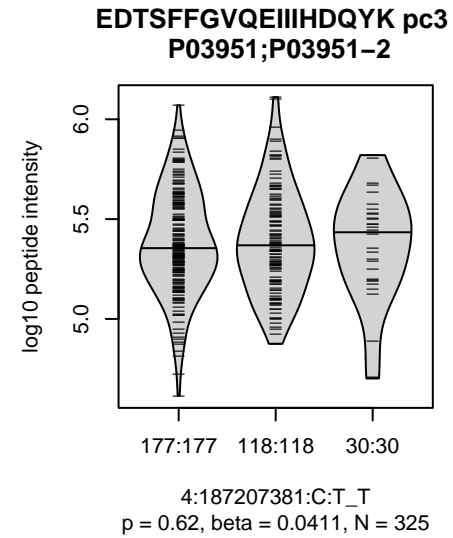

Assay Target: F11  
 Olink UniProt: P03951  
 deCODE rsID: rs2289252  
 Proxy rsID: rs2289252  
 deCODE: 4:186286227:T:C  
 Proxy SNP: 4:187207381:C:T  
 deCODE log10(p): 331.7  
 deCODE BETA: 0.33  
 .....  
 1259:1259:1259:1259:1259:125

**CD8A : NP3**  
**B8ZZZ4;P01732;P01732-2**

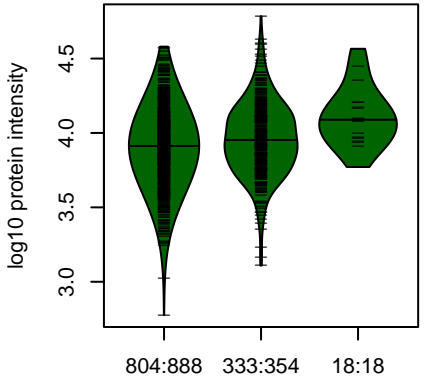

2:87016506:A:G\_G  
 $p = 3.9e-05$ ,  $\beta = 0.241$ ,  $N = 1155$

**TWNLGETVELK pc2**  
**B8ZZZ4;P01732;P01732-2**

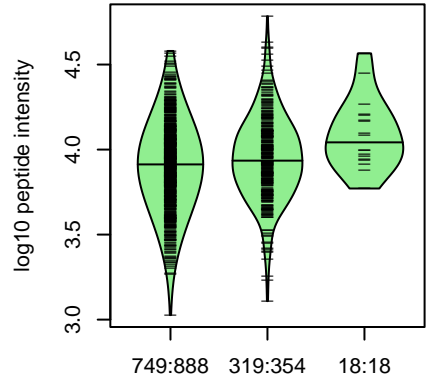

2:87016506:A:G\_G  
 $p = 0.00046$ ,  $\beta = 0.21$ ,  $N = 1086$

**AAEGLDTQR pc2**  
**B8ZZZ4;P01732;P01732-2**

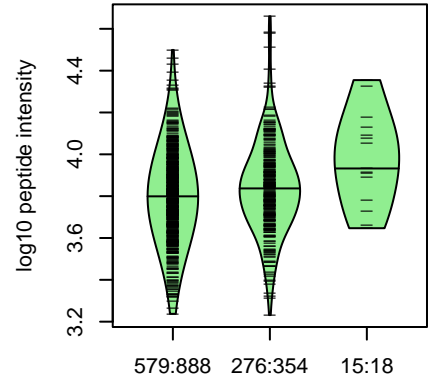

2:87016506:A:G\_G  
 $p = 0.0014$ ,  $\beta = 0.21$ ,  $N = 870$

**GAAASPTFLLYLSQNK pc2**  
**B8ZZZ4;P01732;P01732-2**

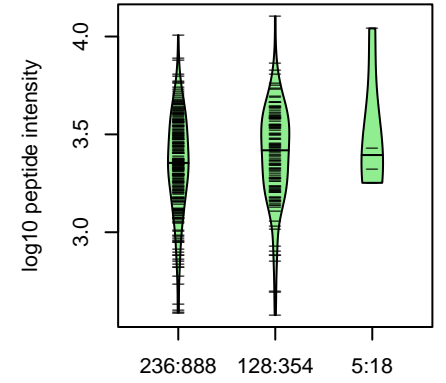

2:87016506:A:G\_G  
 $p = 0.1$ ,  $\beta = 0.164$ ,  $N = 369$

**CD8A : NP3**  
**P01732-2**

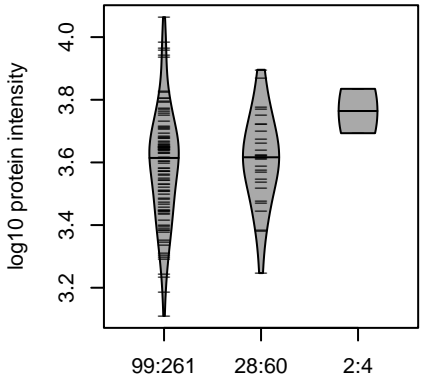

2:87016506:A:G\_G  
 $p = 0.29$ ,  $\beta = 0.193$ ,  $N = 129$

**TWNLGETVELK pc2**  
**B8ZZZ4;P01732;P01732-2**

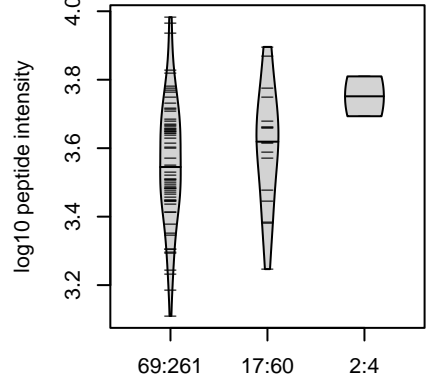

2:87016506:A:G\_G  
 $p = 0.17$ ,  $\beta = 0.297$ ,  $N = 88$

**AAEGLDTQR pc2**  
**B8ZZZ4;P01732;P01732-2**

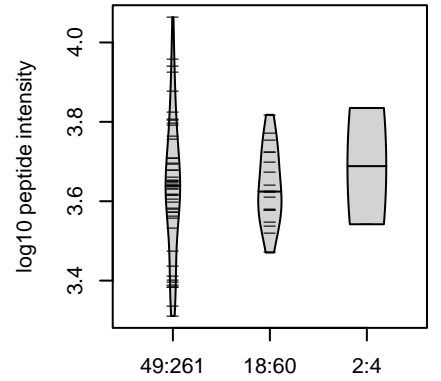

2:87016506:A:G\_G  
 $p = 0.91$ ,  $\beta = 0.0243$ ,  $N = 69$

Assay Target: CD8A  
 Olink UniProt: P01732  
 deCODE rsID: rs3020726  
 Proxy rsID: rs3020726  
 deCODE: 2:86789383:G:A  
 Proxy SNP: 2:87016506:A:G  
 deCODE  $\log_{10}(p)$ : 329.6  
 deCODE BETA: 0.4  
 \*.\*.-;--  
 1086:870:369:65

**ENO3 : NP4  
P13929**

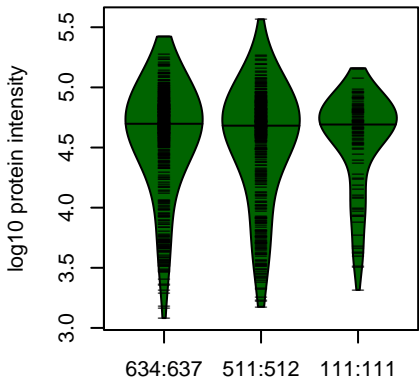

17:4856376:A:G\_A  
p = 0.12, beta = -0.0682, N = 1256

**AAVPSGASTGIYEALR pc2  
3;A0A2R8YEG5;F5H0C8;P09104-2;P1Y6G6;P09104-2;P13929;P13929-3;P06;F5H0C8;P09104-2;P13929;P13929-3**

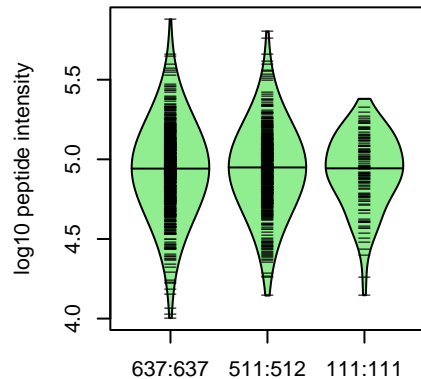

17:4856376:A:G\_A  
p = 0.64, beta = -0.0204, N = 1259

**FGANAILGVSLAVCK pc2**

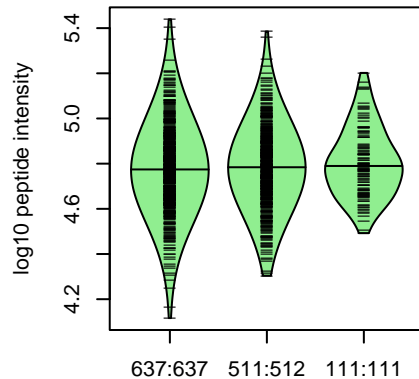

17:4856376:A:G\_A  
p = 0.27, beta = 0.0481, N = 1259

**SGETEDTFIADLVVGLCTGQIK pc3ADLAGNPDLILPVPAFNVINGGSHAGN  
P13929;P13929-3**

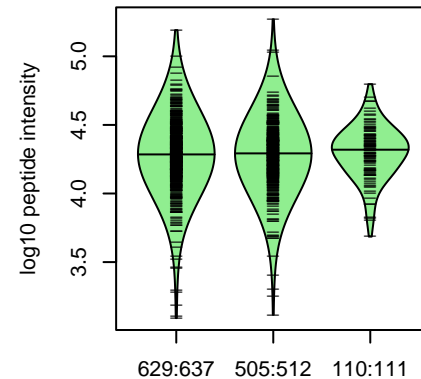

17:4856376:A:G\_A  
p = 0.93, beta = -0.00373, N = 1244

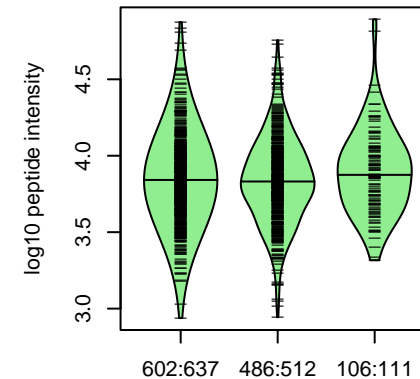

17:4856376:A:G\_A  
p = 0.52, beta = 0.0283, N = 1194

**ENO3 : NP4  
P13929**

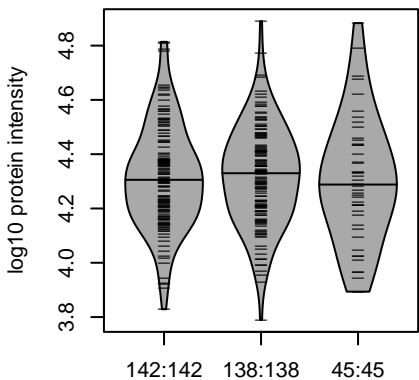

17:4856376:A:G\_A  
p = 0.4, beta = -0.0657, N = 325

**AAVPSGASTGIYEALR pc2  
3;A0A2R8YEG5;F5H0C8;P09104-2;P1**

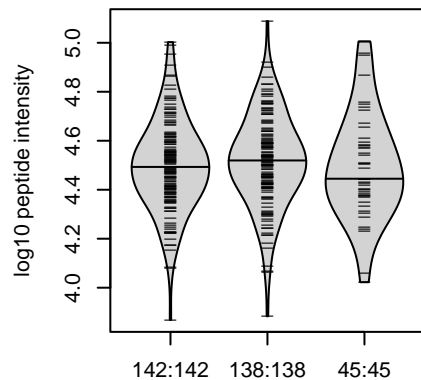

17:4856376:A:G\_A  
p = 0.6, beta = -0.0414, N = 325

**VNQIGSVTESIQACK pc2  
P13929;P13929-3**

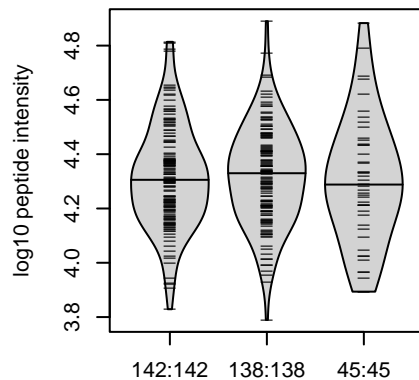

17:4856376:A:G\_A  
p = 0.4, beta = -0.0657, N = 325

**SGETEDTFIADLVVGLCTGQIK pc3  
6;F5H0C8;P09104-2;P13929;P13929-Y6G6;P09104-2;P13929;P13929-3;P0**

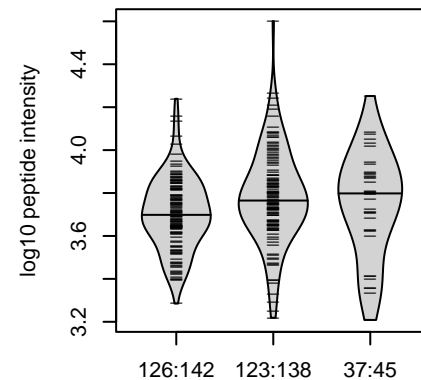

17:4856376:A:G\_A  
p = 0.00083, beta = 0.281, N = 286

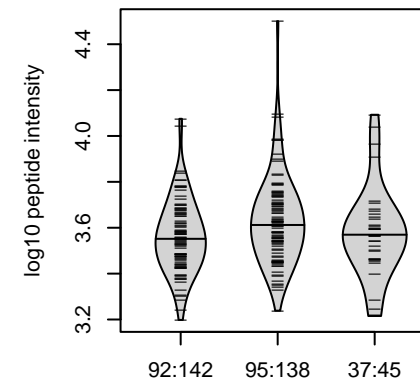

17:4856376:A:G\_A  
p = 0.2, beta = 0.117, N = 224

**AVENINNTLGPALLQK pc2  
rs238238 REF**

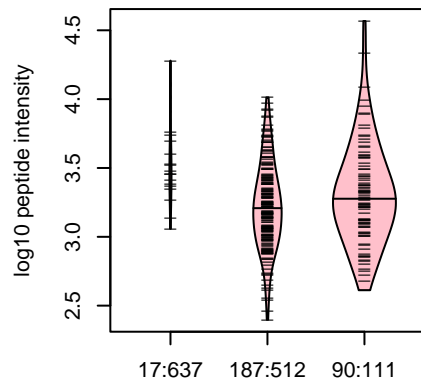

17:4856376:A:G\_A  
p = 5.7e-79, model = REC, N = 294

**AVENINSTLGPALLQK pc2  
rs238238 ALT**

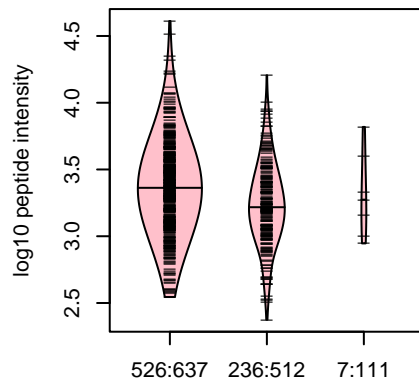

17:4856376:A:G\_A  
p = 9.1e-59, model = REC, N = 769

**AVENINSTLGPALLQK pc3  
rs238238 ALT**

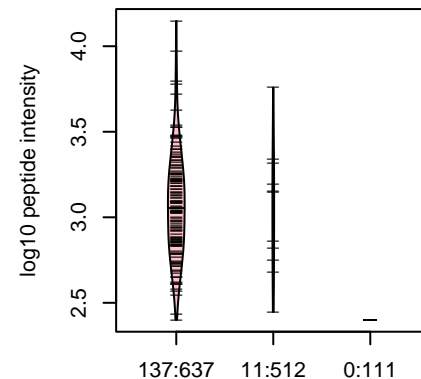

17:4856376:A:G\_A  
p = 2.5e-31, model = REC, N = 148

**LSVVDQEK pc2  
rs238239 REF**

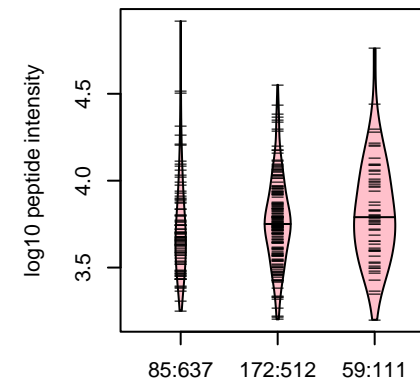

17:4856376:A:G\_A  
p = 8.8e-23, model = REC, N = 316

Assay Target: ENO3  
Olink UniProt: P13929  
deCODE rsID: rs238238  
Proxy rsID: rs238238  
deCODE: 17:4953081:A:G  
Proxy SNP: 17:4856376:A:G  
deCODE log10(p): 325.3  
deCODE BETA: 0.33  
-----  
1259:1259:1244:1194:1079:100

**APOL1 : NP4**  
**O14791**

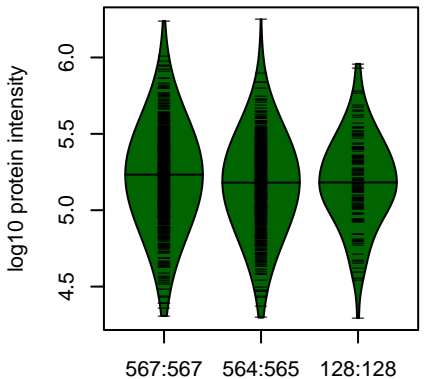

22:36652931:C:T\_C  
p = 0.016, beta = -0.103, N = 1259

**VNEPSILEMSR pc2**  
**O14791;O14791-2;O14791-3**

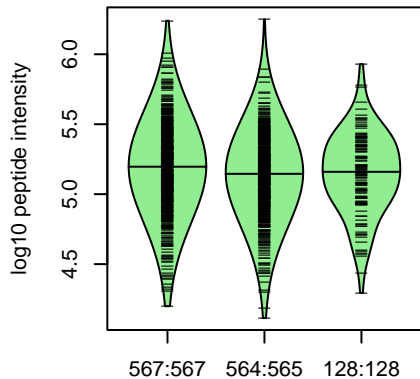

22:36652931:C:T\_C  
p = 0.01, beta = -0.11, N = 1259

**WWTQAQAHDLVIK pc3**  
**O14791;O14791-2;O14791-3**

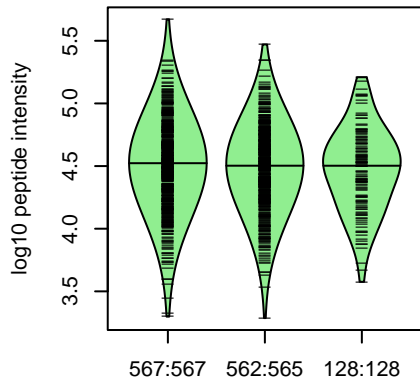

22:36652931:C:T\_C  
p = 0.16, beta = -0.0596, N = 1257

**VTEPISAESGEQVER pc2**  
**O14791;O14791-2;O14791-3**

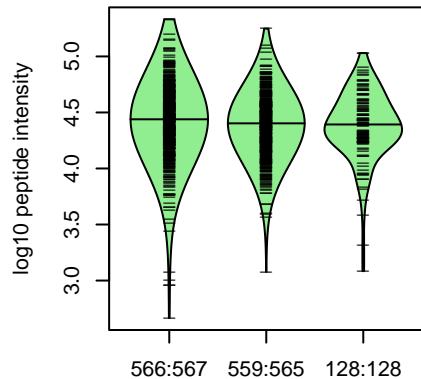

22:36652931:C:T\_C  
p = 0.023, beta = -0.0976, N = 1253

**LNILNNNYK pc2**  
**O14791;O14791-2;O14791-3**

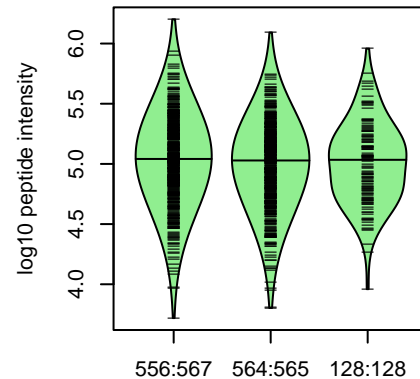

22:36652931:C:T\_C  
p = 0.057, beta = -0.0819, N = 1248

**APOL1 : NP4**  
**O14791**

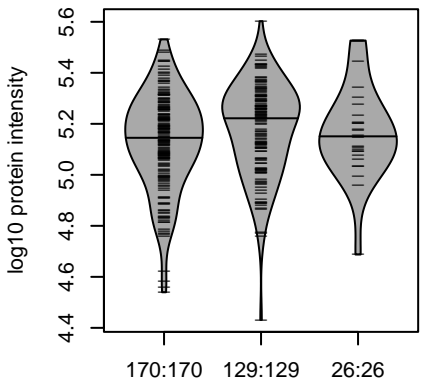

22:36652931:C:T\_C  
p = 0.021, beta = 0.198, N = 325

**LNILNNNYK pc2**  
**O14791;O14791-2;O14791-3**

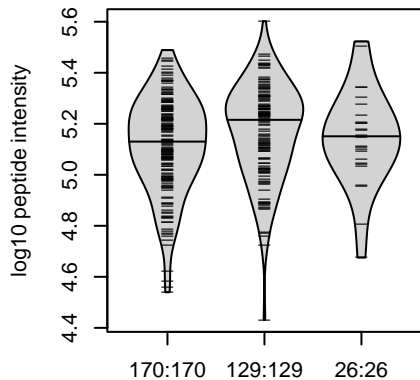

22:36652931:C:T\_C  
p = 0.022, beta = 0.197, N = 325

**NEADELRK pc2**  
**O14791;O14791-2;O14791-3**

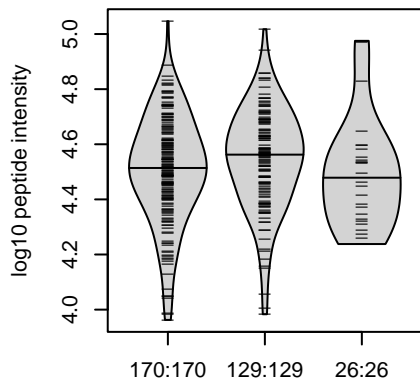

22:36652931:C:T\_C  
p = 0.2, beta = 0.111, N = 325

**VTEPISAESGEQVER pc2**  
**O14791;O14791-2;O14791-3**

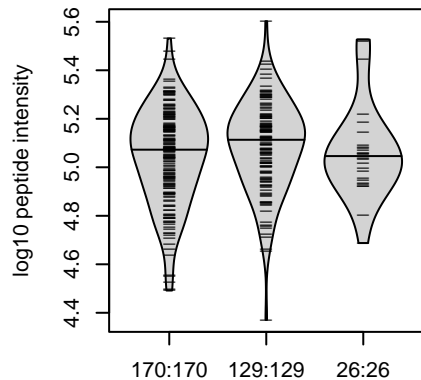

22:36652931:C:T\_C  
p = 0.14, beta = 0.127, N = 325

**WWTQAQAHDLVIK pc3**  
**O14791;O14791-2;O14791-3**

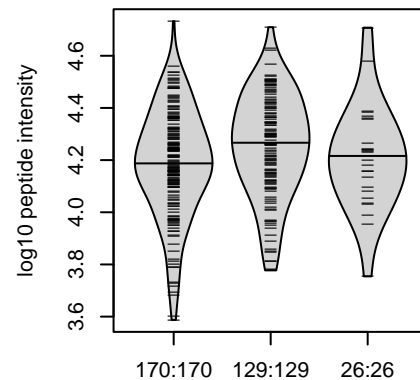

22:36652931:C:T\_C  
p = 0.026, beta = 0.191, N = 325

Assay Target: APOL1  
Olink UniProt: O14791  
deCODE rsID: rs136148  
Proxy rsID: rs136148  
deCODE: 22:36256885:C:T  
Proxy SNP: 22:36652931:C:T  
deCODE log10(p): 319.7  
deCODE BETA: -0.35  
-----  
1259:1257:1253:1248:1244:124

**SELEDNIR pc2**  
**rs2239785 REF**

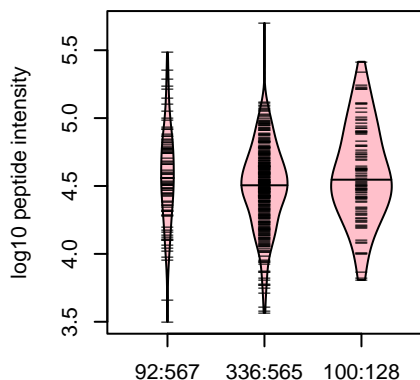

22:36652931:C:T\_C  
p = 2.9e-66, model = REC, N = 528

**SKLEDNIR pc2**  
**rs2239785 ALT**

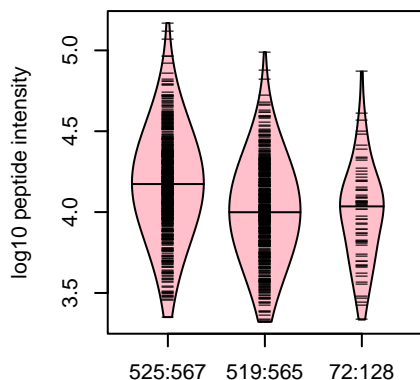

22:36652931:C:T\_C  
p = 8.7e-24, model = DOM, N = 1116

**SELEDNIRR pc2**  
**rs2239785 REF**

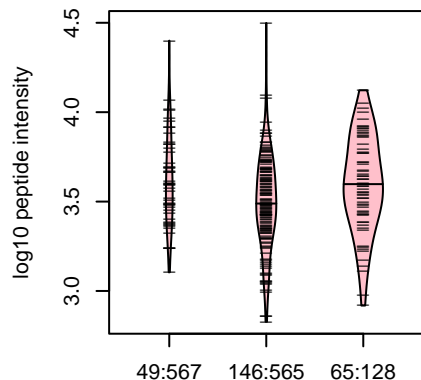

22:36652931:C:T\_C  
p = 1.2e-22, model = REC, N = 260

**LEDNIRR pc2**  
**rs2239785 ALT**

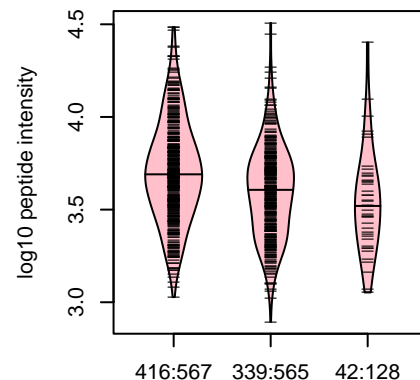

22:36652931:C:T\_C  
p = 1.8e-13, model = DOM, N = 797

**DKK3 : NP2  
Q9UBP4**

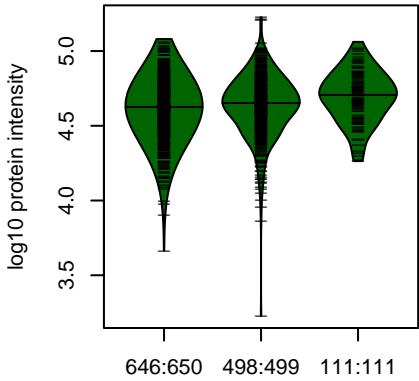

11:12038874:G:A\_A  
p = 1.7e-05, beta = 0.186, N = 1255

**DCQPGLCCAFQR pc2  
F6SYF8;Q9UBP4**

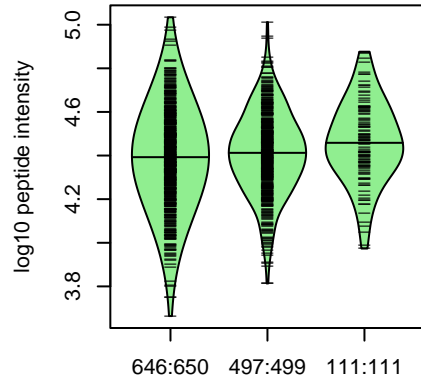

11:12038874:G:A\_A  
p = 0.00068, beta = 0.147, N = 1254

**DSECCGDQLCVWGHCTK pc3  
F6SYF8;Q9UBP4**

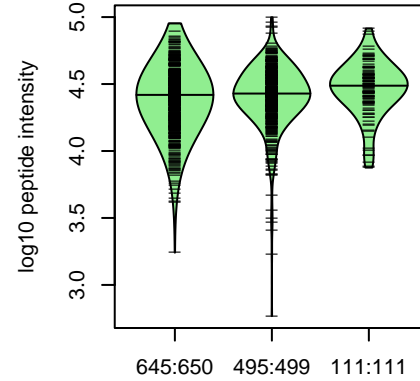

11:12038874:G:A\_A  
p = 3e-04, beta = 0.156, N = 1251

**SAVEEMEAEAAAK pc2  
F6SYF8;Q9UBP4**

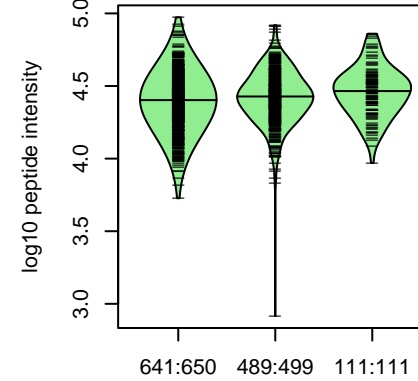

11:12038874:G:A\_A  
p = 4.5e-05, beta = 0.177, N = 1241

**EVEELMEDTQHK pc2  
F6SYF8;Q9UBP4**

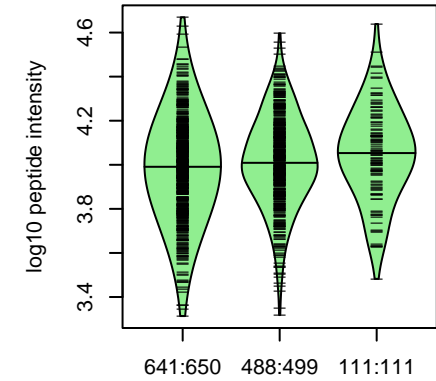

11:12038874:G:A\_A  
p = 0.00037, beta = 0.154, N = 1240

**DKK3 : NP2  
Q9UBP4**

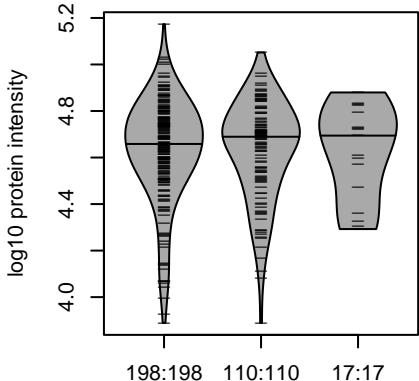

11:12038874:G:A\_A  
p = 0.97, beta = -0.00397, N = 325

**DCQPGLCCAFQR pc2  
F6SYF8;Q9UBP4**

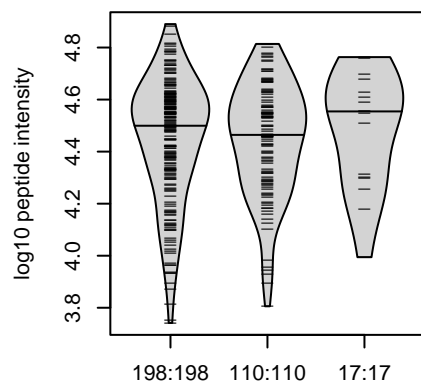

11:12038874:G:A\_A  
p = 0.45, beta = 0.0696, N = 325

**DQDGEILLPR pc2  
F6SYF8;Q9UBP4**

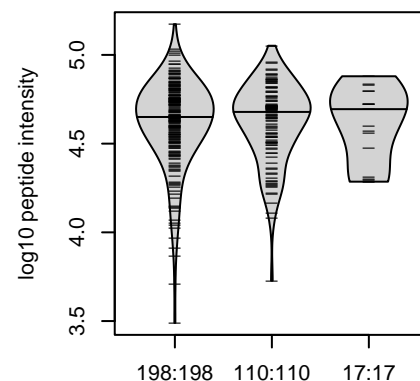

11:12038874:G:A\_A  
p = 0.98, beta = 0.00257, N = 325

**SAVEEMEAEAAAK pc2  
F6SYF8;Q9UBP4**

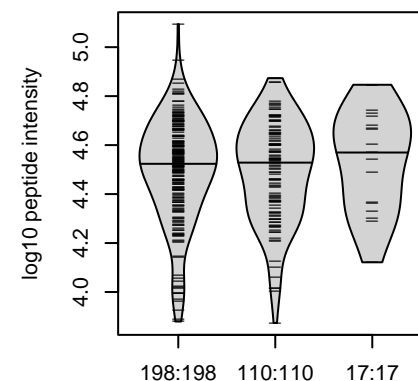

11:12038874:G:A\_A  
p = 0.59, beta = 0.0492, N = 325

**EVEELMEDTQHK pc2  
F6SYF8;Q9UBP4**

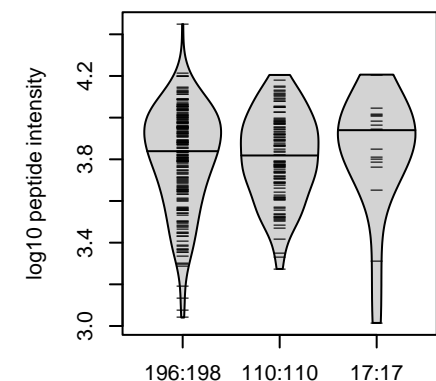

11:12038874:G:A\_A  
p = 0.47, beta = 0.0664, N = 323

**EPAAAAAALLGEEI pc2  
rs3206824 REF**

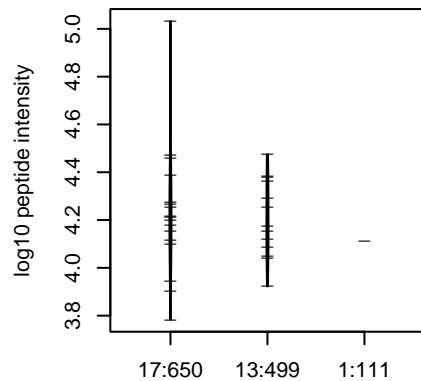

11:12038874:G:A\_A  
p = 0.51, model = DOM, N = 31

**SLTEEMALR pc2  
rs3206824 REF**

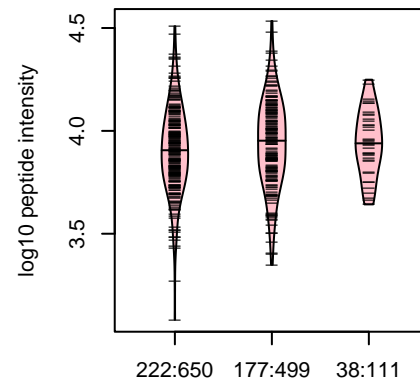

11:12038874:G:A\_A  
p = 0.72, model = REC, N = 437

Assay Target: DKK3  
Olink UniProt: Q9UBP4  
deCODE rsID: rs11022114  
Proxy rsID: rs11022114  
deCODE: 11:12017327:A:G  
Proxy SNP: 11:12038874:G:A  
deCODE log10(p): 317.4  
deCODE BETA: 0.33  
\*.\*.\*.\*.\*.\*.\*.\*.\*.\*  
1254:1251:1241:1240:1231:119



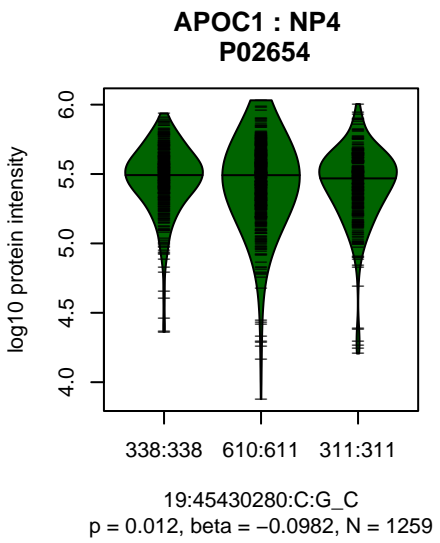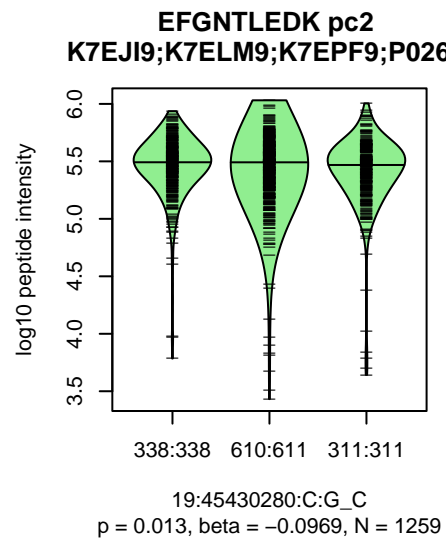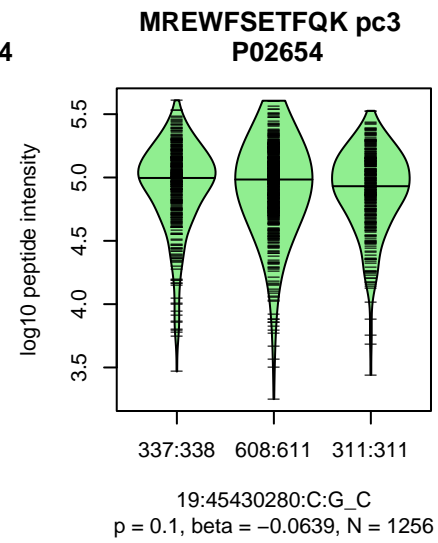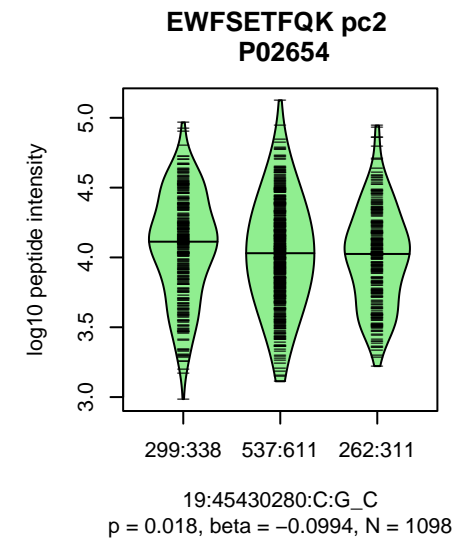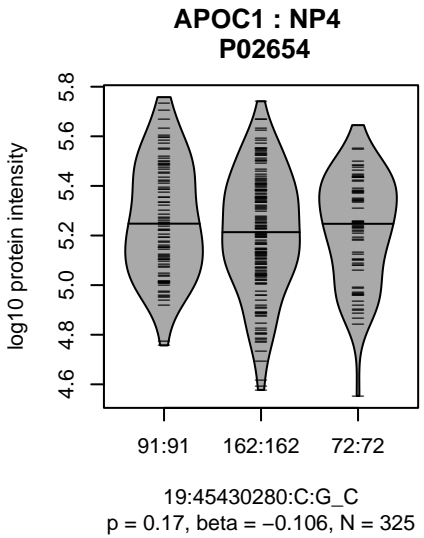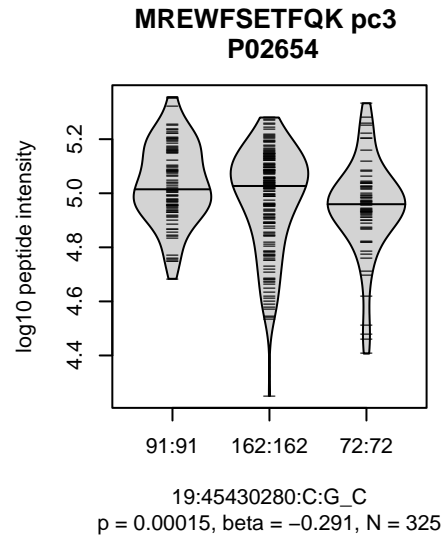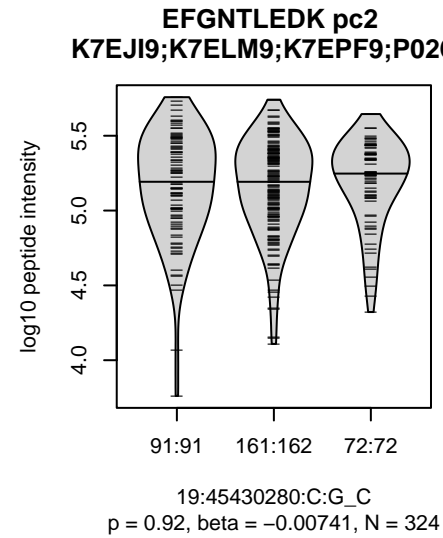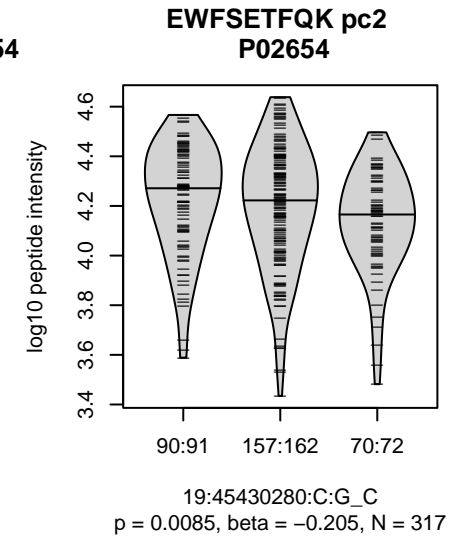

Assay Target: APOC1  
 Olink UniProt: P02654  
 deCODE rsID: rs5112  
 Proxy rsID: rs5112  
 deCODE: 19:44927023:G:C  
 Proxy SNP: 19:45430280:C:G  
 deCODE log<sub>10</sub>(p): 298.6  
 deCODE BETA: 0.3  
 -: -: -: :NA:NA:NA:NA  
 1259:1256:1143:1098:6:7:4:10

**PF4V1 : NP4  
P10720**

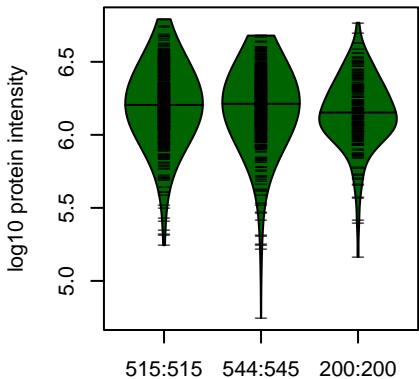

4:74718101:G:A\_G  
p = 0.097, beta = -0.0655, N = 1259

**ICLDLQALLYK pc2  
P10720**

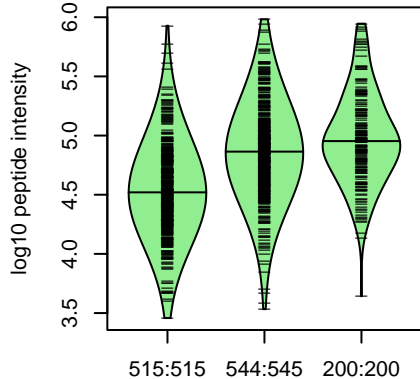

4:74718101:G:A\_G  
p = 1e-45, beta = 0.539, N = 1259

**AEAEEDGDLQCLVK pc2  
P10720**

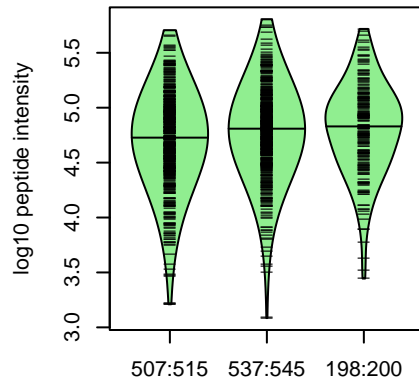

4:74718101:G:A\_G  
p = 0.00096, beta = 0.131, N = 1242

**ICLDLQALLYK pc3  
P10720**

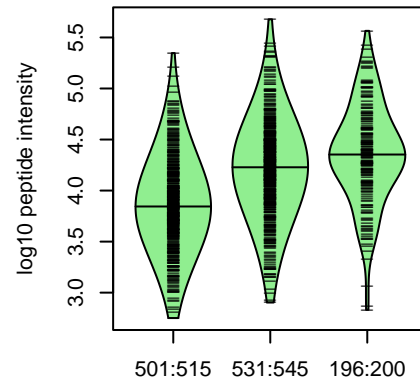

4:74718101:G:A\_G  
p = 7.6e-36, beta = 0.484, N = 1228

**HITSLEVIK pc2  
A0A8I5KW61;P02776;P10720**

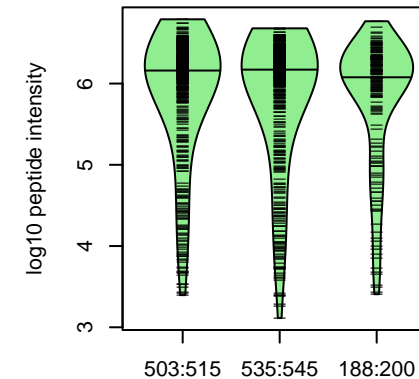

4:74718101:G:A\_G  
p = 0.95, beta = 0.00238, N = 1226

**PF4V1 : NP4  
P10720**

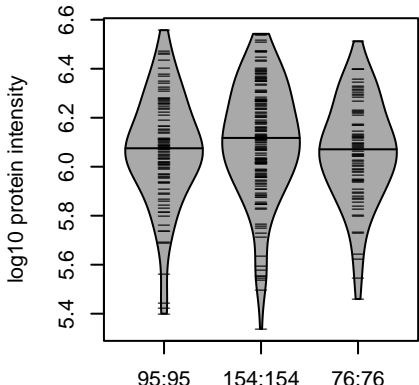

4:74718101:G:A\_G  
p = 0.92, beta = 0.00787, N = 325

**AGPHCPTAQLIATLK pc2  
A0A8I5KW61;P02776;P10720**

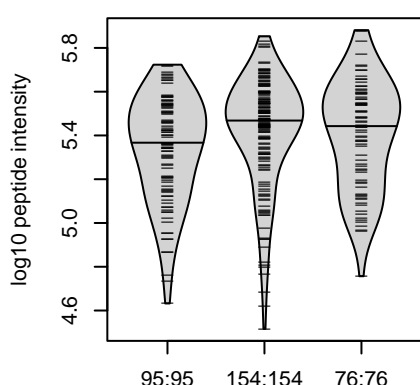

4:74718101:G:A\_G  
p = 0.013, beta = 0.188, N = 325

**AEAEEDGDLQCLVK pc2  
P10720**

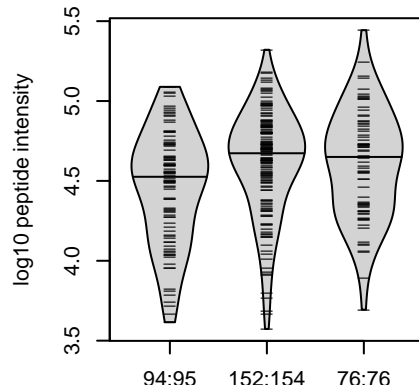

4:74718101:G:A\_G  
p = 0.0029, beta = 0.224, N = 322

**ICLDLQALLYK pc2  
P10720**

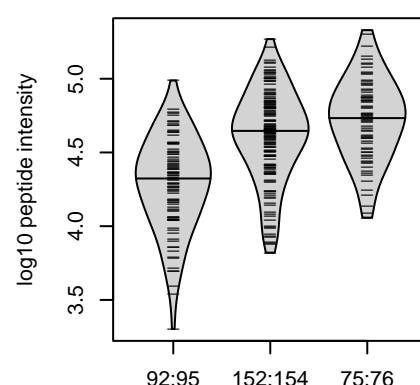

4:74718101:G:A\_G  
p = 3.4e-16, beta = 0.594, N = 319

**HITSLEVIK pc2  
A0A8I5KW61;P02776;P10720**

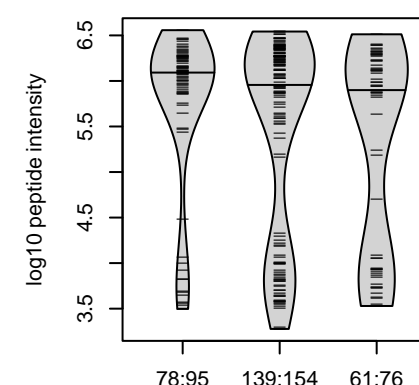

4:74718101:G:A\_G  
p = 0.14, beta = -0.124, N = 278

Assay Target: PF4V1  
Olink UniProt: P10720  
deCODE rsID: rs872914  
Proxy rsID: rs872914  
deCODE: 4:73852384:G:A  
Proxy SNP: 4:74718101:G:A  
deCODE log10(p): 297.5  
deCODE BETA: 0.32  
\*.\*.\*-:-\*.\*.\*-:-  
1259:1242:1228:1226:1209:120

**LEAP2 : NP3**  
**Q969E1**

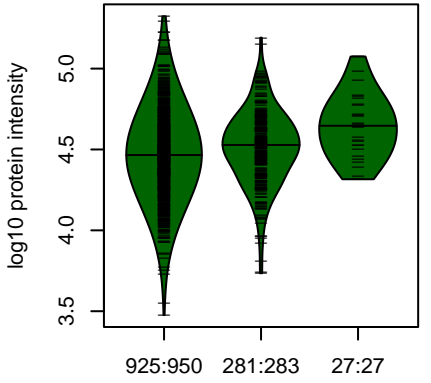

5:132238880:T:C\_C  
 $p = 0.0014$ ,  $\beta = 0.183$ ,  $N = 1233$

**DDSECITR pc2**  
**Q969E1**

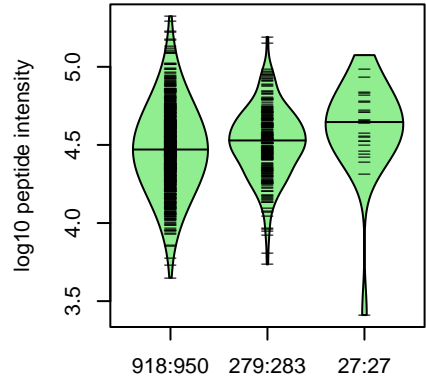

5:132238880:T:C\_C  
 $p = 0.0028$ ,  $\beta = 0.173$ ,  $N = 1224$

**RCSLSVAQE pc2**  
**Q969E1**

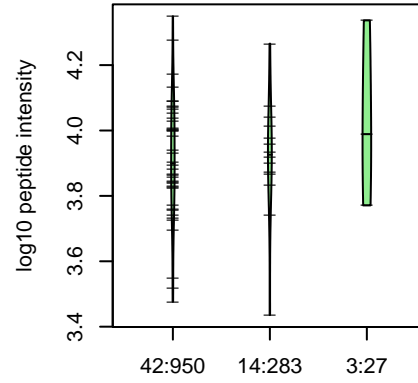

5:132238880:T:C\_C  
 $p = 0.13$ ,  $\beta = 0.327$ ,  $N = 59$

Assay Target: LEAP2  
Olink UniProt: Q969E1  
deCODE rsID: rs12515756  
Proxy rsID: rs12515756  
deCODE: 5:132903188:C:T  
Proxy SNP: 5:132238880:T:C  
deCODE log10(p): 296.6  
deCODE BETA: 0.4  
\*.-  
1224:59

**GFRA2 : NP3  
O00451**

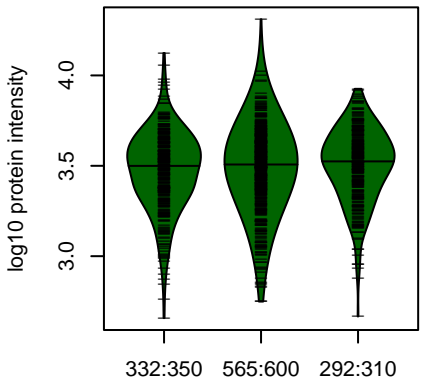

8:21550768:A:C\_C  
p = 0.029, beta = 0.0869, N = 1189

**LASIFSGTGADPVVSAK pc2  
O00451;O00451-3**

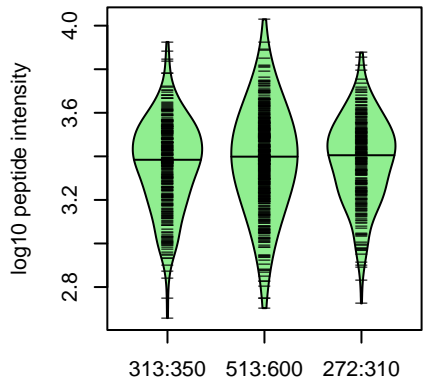

8:21550768:A:C\_C  
p = 0.13, beta = 0.0628, N = 1098

**QTILPSCSYEDK pc2  
O00451;O00451-2;O00451-3**

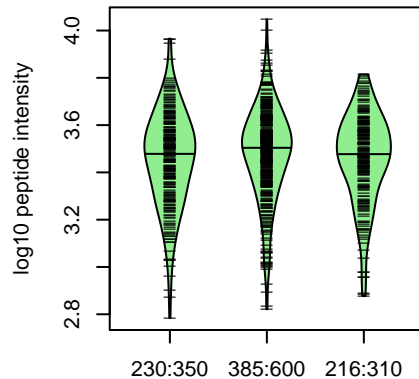

8:21550768:A:C\_C  
p = 0.89, beta = 0.00659, N = 831

**DFTENPCLR pc2  
O00451;O00451-2;O00451-3**

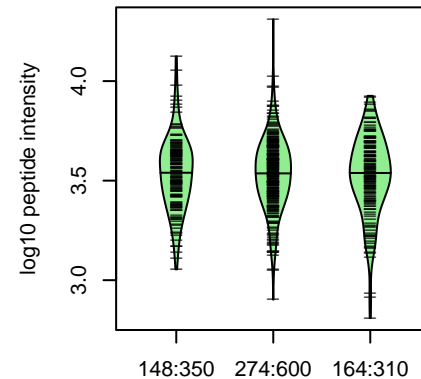

8:21550768:A:C\_C  
p = 0.86, beta = -0.00988, N = 586

**ACNLNDNCK pc2  
O00451;O00451-2;O00451-3**

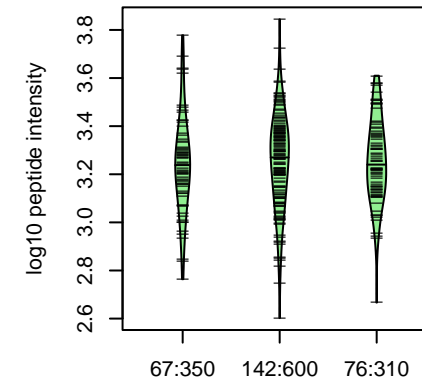

8:21550768:A:C\_C  
p = 0.94, beta = -0.00598, N = 285

**GFRA2 : NP3  
O00451**

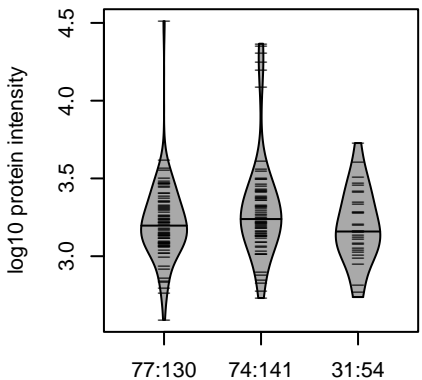

8:21550768:A:C\_A  
p = 0.95, beta = 0.00614, N = 182

**LASIFSGTGADPVVSAK pc2  
O00451;O00451-3**

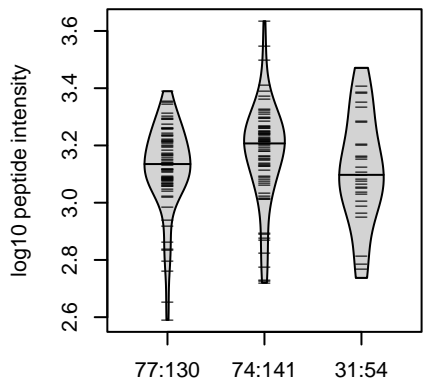

8:21550768:A:C\_A  
p = 0.48, beta = 0.0703, N = 182

Assay Target: GFRA2  
Olink UniProt: O00451  
deCODE rsID: rs15881  
Proxy rsID: rs15881  
deCODE: 8:21693256:A:C  
Proxy SNP: 8:21550768:A:C  
deCODE log10(p): 292.7  
deCODE BETA: -0.31  
- - - - -  
1098:831:586:285:211:169:139

**ELANE : NP4  
P08246**

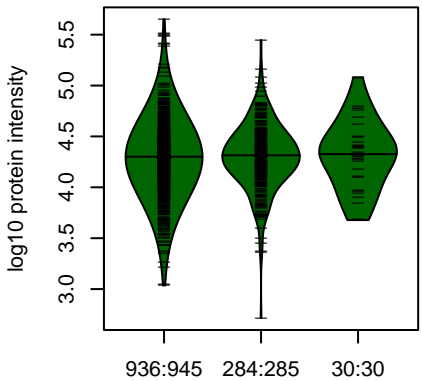

19:850733:C:G\_G  
p = 0.27, beta = 0.0624, N = 1250

**GHFCGATLIAPNFVMSAAHCVANVNI  
P08246**

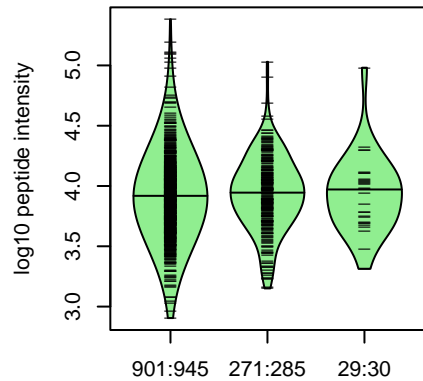

19:850733:C:G\_G  
p = 0.25, beta = 0.0664, N = 1201

**VVLGAHNLSR pc2  
P08246**

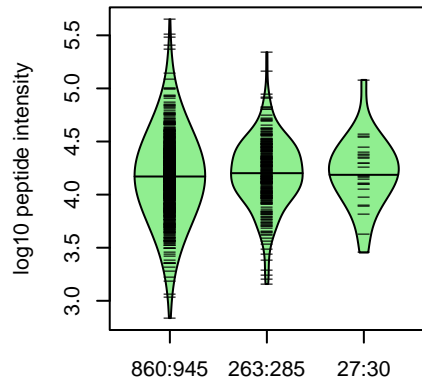

19:850733:C:G\_G  
p = 0.18, beta = 0.0789, N = 1150

**QVFAVQR pc2  
P08246**

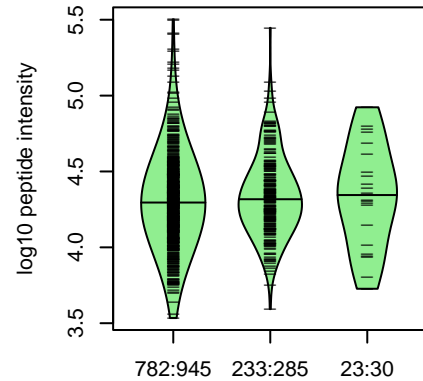

19:850733:C:G\_G  
p = 0.13, beta = 0.0959, N = 1038

**SNVCTLVR pc2  
P08246**

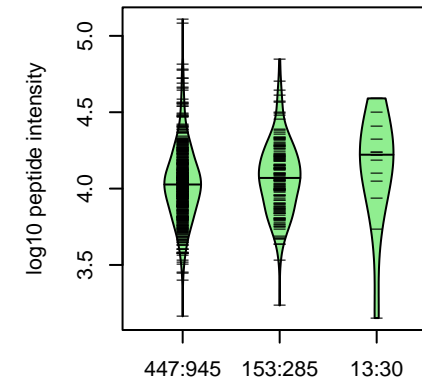

19:850733:C:G\_G  
p = 0.025, beta = 0.179, N = 613

**ELANE : NP4  
P08246**

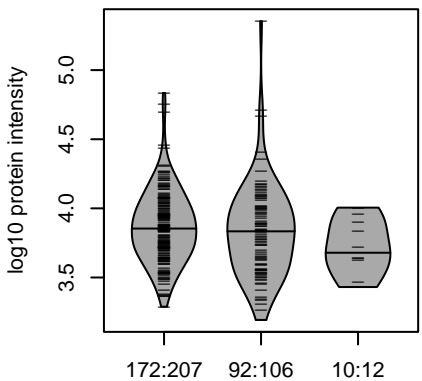

19:850733:C:G\_G  
p = 0.3, beta = -0.109, N = 274

**GHFCGATLIAPNFVMSAAHCVANVNI  
P08246**

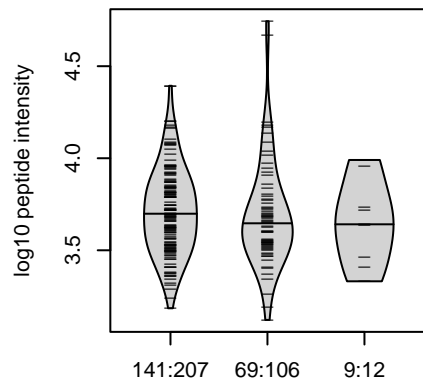

19:850733:C:G\_G  
p = 0.46, beta = -0.0861, N = 219

**VVLGAHNLSR pc2  
P08246**

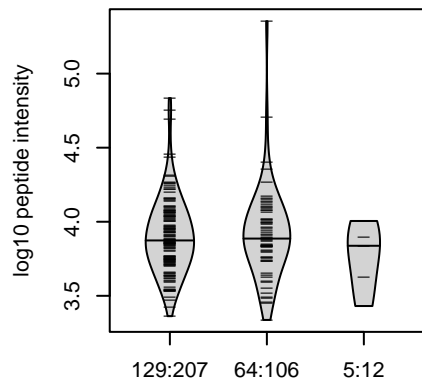

19:850733:C:G\_G  
p = 0.97, beta = -0.00526, N = 198

**SNVCTLVR pc2  
P08246**

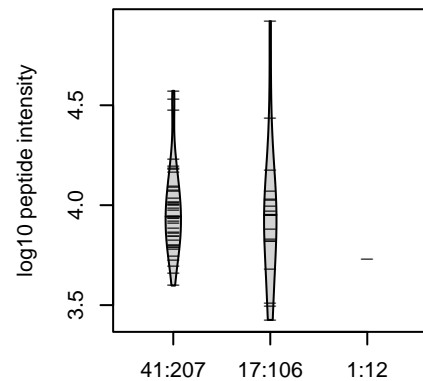

19:850733:C:G\_G  
p = 0.38, beta = -0.219, N = 59

**LGNGVQCLAMGWLLGR pc2  
P08246**

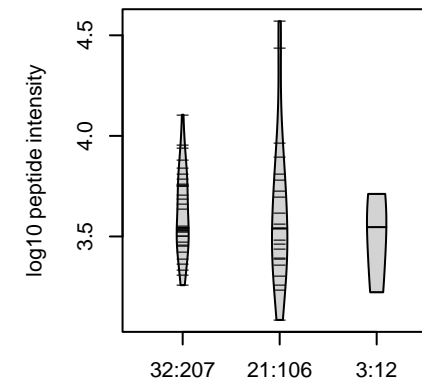

19:850733:C:G\_G  
p = 0.95, beta = 0.0143, N = 56

Assay Target: ELANE  
Olink UniProt: P08246  
deCODE rsID: rs10409474  
Proxy rsID: rs10409474  
deCODE: 19:850733:G:C  
Proxy SNP: 19:850733:C:G  
deCODE log10(p): 290.7  
deCODE BETA: 0.45  
- - - - -  
1201:1150:1038:613:426:417

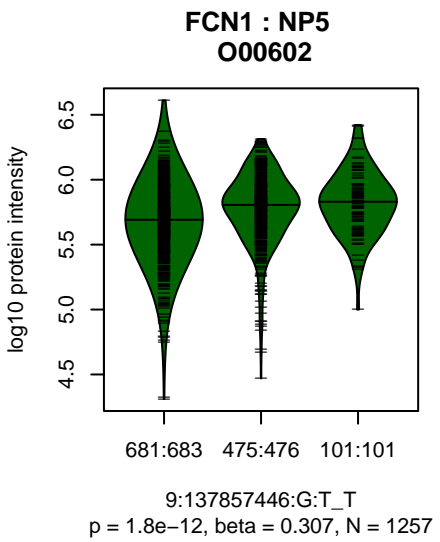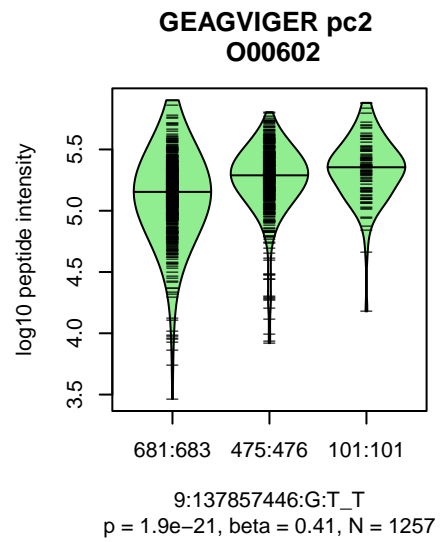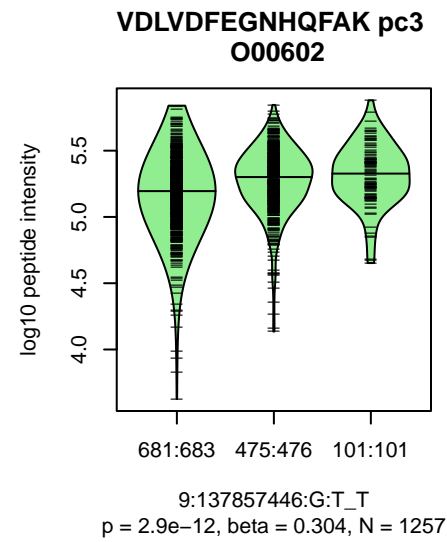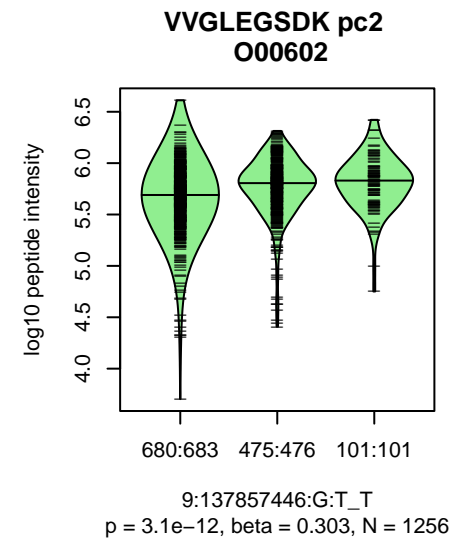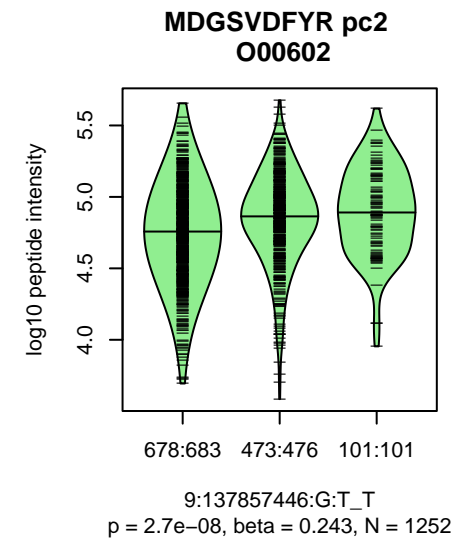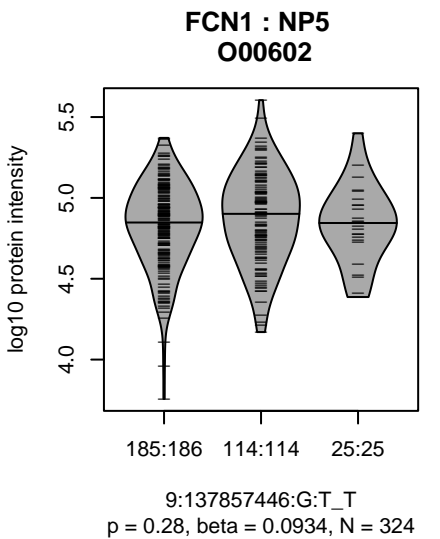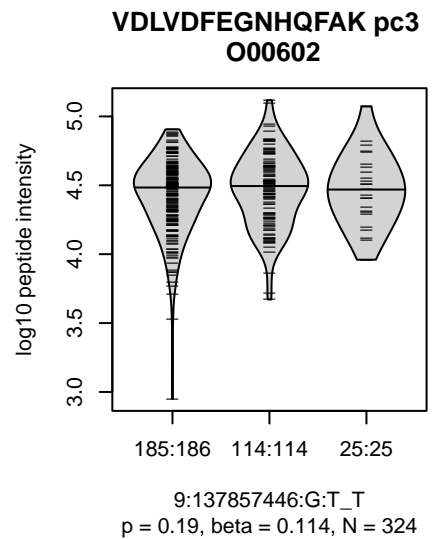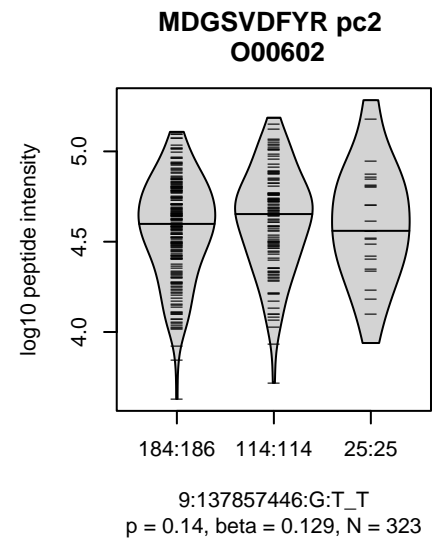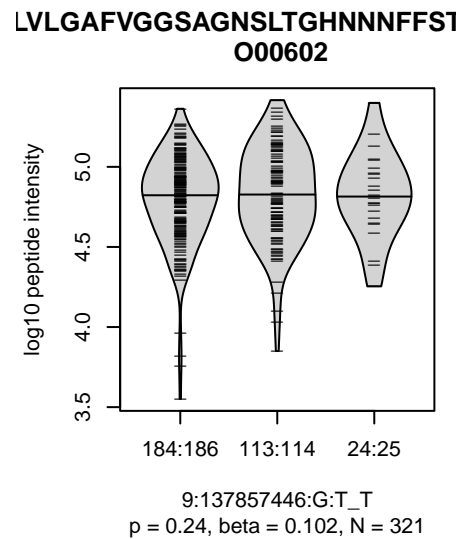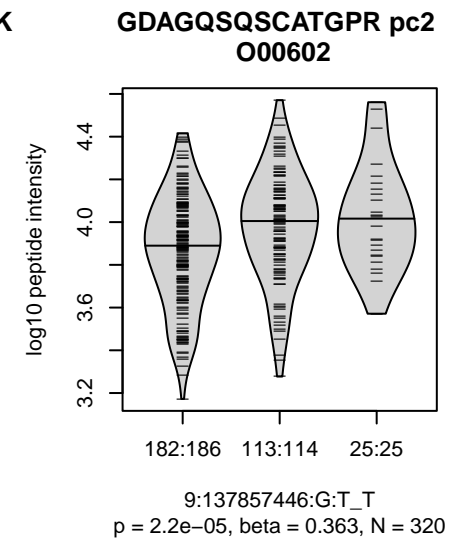

Assay Target: FCN1  
 Olink UniProt: O00602  
 deCODE rsID: rs11103604  
 Proxy rsID: rs11103604  
 deCODE: 9:134965600:T:G  
 Proxy SNP: 9:137857446:G:T  
 deCODE log10(p): 288.3  
 deCODE BETA: 0.34  
 \*\*\*\*\*\_:NA:NA  
 1257:1257:1256:1253:1252:124

**CD5L : NP4  
O43866**

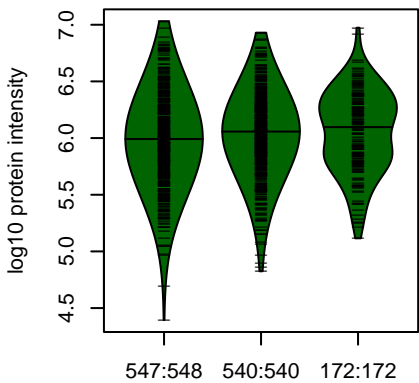

1:157804648:G:A\_A  
p = 0.11, beta = 0.0653, N = 1259

**GQWGTVCDDGWDIK pc2  
O43866**

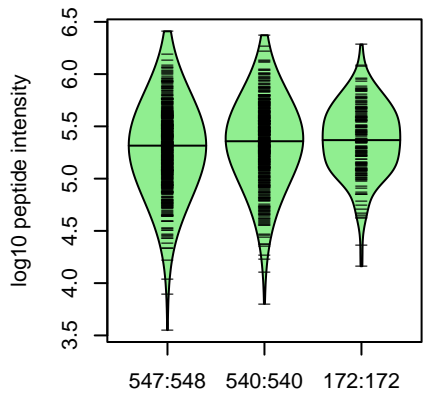

1:157804648:G:A\_A  
p = 0.054, beta = 0.0778, N = 1259

**GVWGSVCCDNWGEK pc2  
O43866**

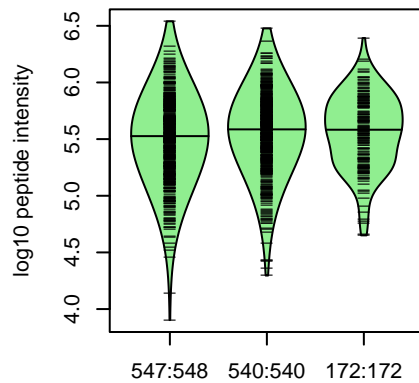

1:157804648:G:A\_A  
p = 0.081, beta = 0.0706, N = 1259

**CYGPVGR pc2  
O43866**

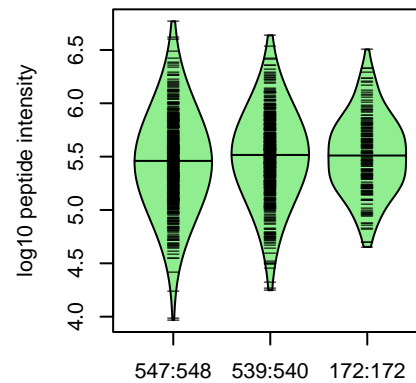

1:157804648:G:A\_A  
p = 0.12, beta = 0.0635, N = 1258

**LVGGDNLCSGR pc2  
O43866**

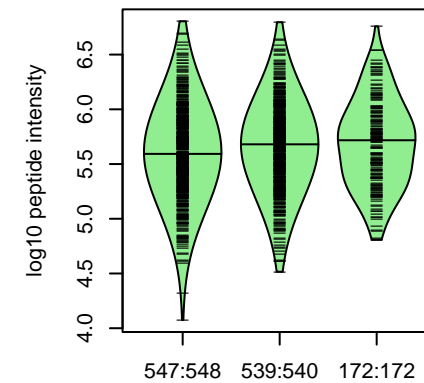

1:157804648:G:A\_A  
p = 0.043, beta = 0.0819, N = 1258

**CD5L : NP4  
O43866**

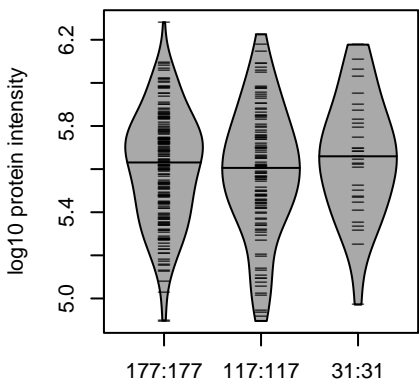

1:157804648:G:A\_A  
p = 0.41, beta = 0.0682, N = 325

**EATLQDCPSGPWVGK pc2  
O43866**

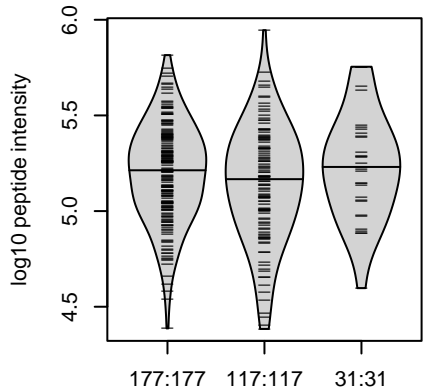

1:157804648:G:A\_A  
p = 0.92, beta = 0.00838, N = 325

**GQWGTVCDDGWDIK pc2  
O43866**

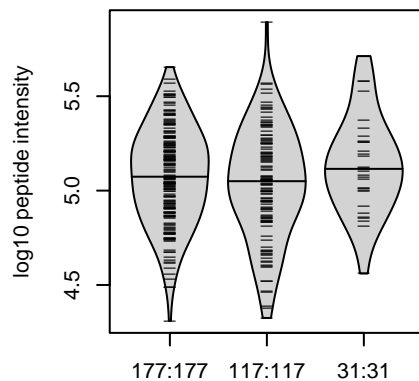

1:157804648:G:A\_A  
p = 0.54, beta = 0.0506, N = 325

**GVWGSVCCDNWGEK pc2  
O43866**

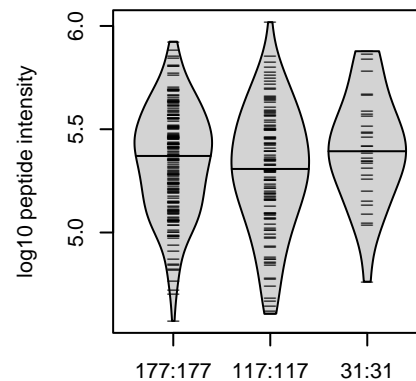

1:157804648:G:A\_A  
p = 0.59, beta = 0.0442, N = 325

**LVGGDNLCSGR pc2  
O43866**

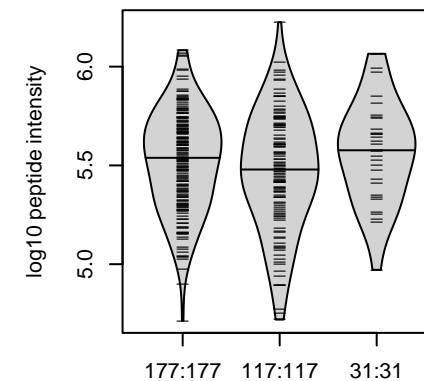

1:157804648:G:A\_A  
p = 0.82, beta = 0.0193, N = 325

Assay Target: CD5L  
Olink UniProt: O43866  
deCODE rsID: rs2765501  
Proxy rsID: rs2765501  
deCODE: 1:157834858:A:G  
Proxy SNP: 1:157804648:G:A  
deCODE log10(p): 284  
deCODE BETA: 0.3  
-----  
1259:1259:1258:1258:1254:124

**FRZB : NP4  
Q92765**

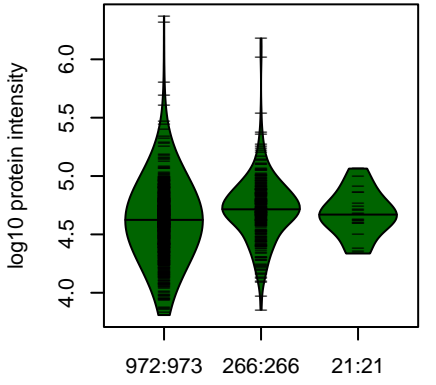

2:183703336:G:A\_A  
p = 1.3e-07, beta = 0.316, N = 1259

**LLLVGSIAEK pc2  
Q92765**

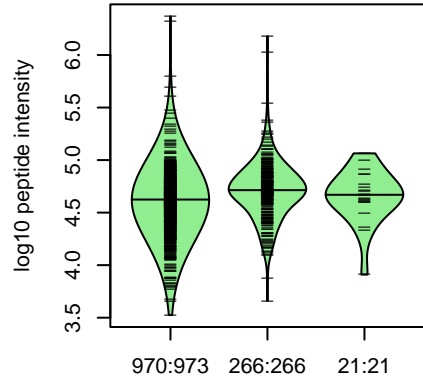

2:183703336:G:A\_A  
p = 3.6e-07, beta = 0.304, N = 1257

**QGCEPILIK pc2  
Q92765**

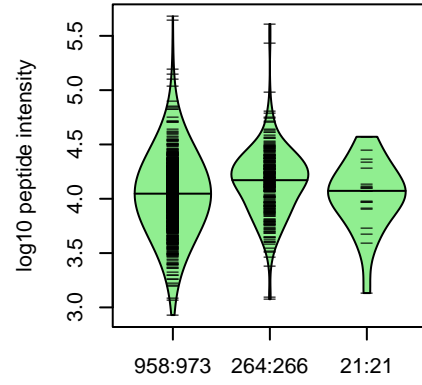

2:183703336:G:A\_A  
p = 1.2e-05, beta = 0.263, N = 1243

**CHDVTAVVEVK pc2  
Q92765**

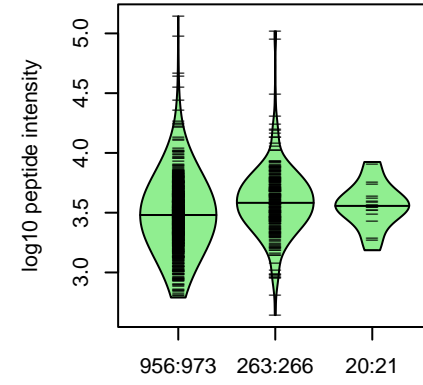

2:183703336:G:A\_A  
p = 9.7e-09, beta = 0.346, N = 1239

**SSLVNIPR pc2  
Q92765**

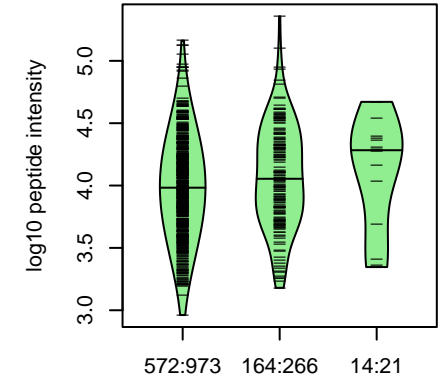

2:183703336:G:A\_A  
p = 0.0092, beta = 0.198, N = 750

**FRZB : NP4  
Q92765**

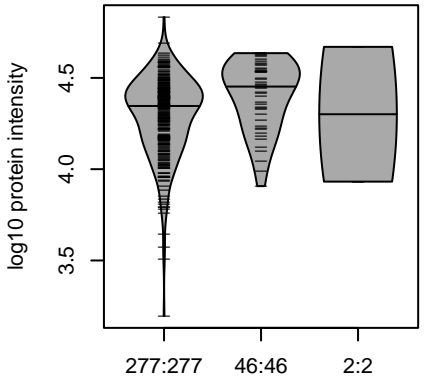

2:183703336:G:A\_A  
p = 0.0096, beta = 0.374, N = 325

**LLLVGSIAEK pc2  
Q92765**

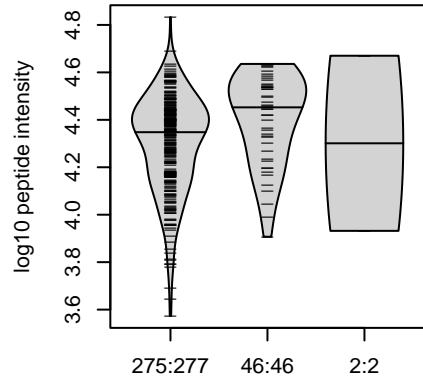

2:183703336:G:A\_A  
p = 0.013, beta = 0.36, N = 323

**QGCEPILIK pc2  
Q92765**

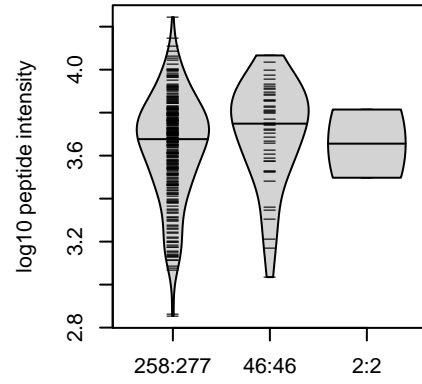

2:183703336:G:A\_A  
p = 0.39, beta = 0.126, N = 306

**CHDVTAVVEVK pc2  
Q92765**

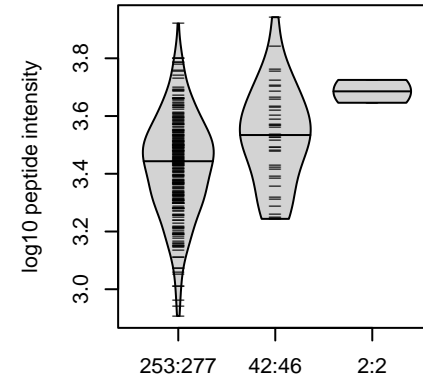

2:183703336:G:A\_A  
p = 0.00012, beta = 0.574, N = 297

**SSLVNIPR pc2  
Q92765**

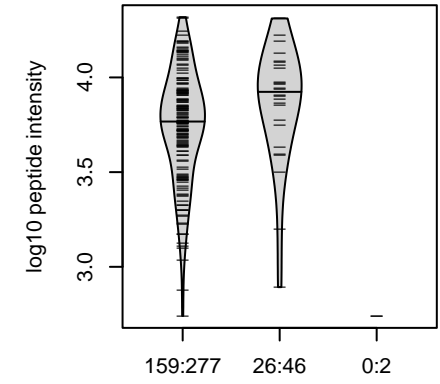

2:183703336:G:A\_A  
p = 0.04, beta = 0.424, N = 185

Assay Target: FRZB  
Olink UniProt: Q92765  
deCODE rsID: rs288326  
Proxy rsID: rs288326  
deCODE: 2:182838608:A:G  
Proxy SNP: 2:183703336:G:A  
deCODE log10(p): 280.4  
deCODE BETA: 0.54  
\*.\*.\*.\*.-.-:NA  
1257:1243:1239:750:522:294:53



**MFAP2 : NP2**  
**P55001;P55001-2**

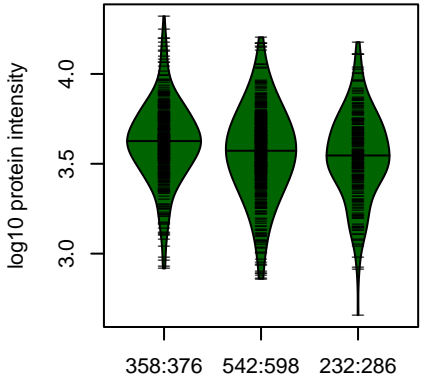

1:17315425:G:A\_G  
 $p = 1.2e-06$ ,  $\beta = -0.201$ ,  $N = 1132$

**TVCAHEELLR pc3**  
**P55001-2;P55001**

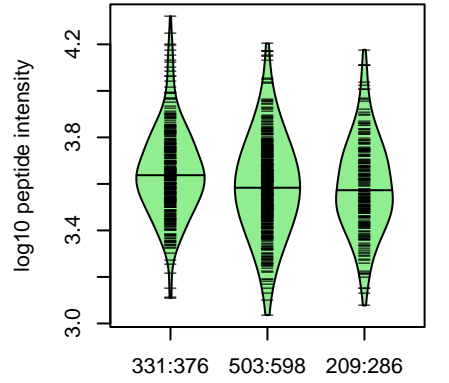

1:17315425:G:A\_G  
 $p = 2.8e-06$ ,  $\beta = -0.202$ ,  $N = 1043$

**CGVMASGLCQSVAASCAR pc3**  
**P55001-2;P55001**

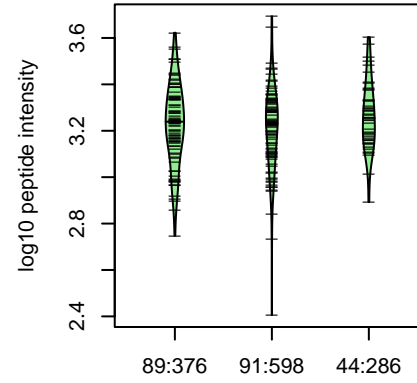

1:17315425:G:A\_G  
 $p = 0.75$ ,  $\beta = 0.0287$ ,  $N = 224$

**MFAP2 : NP2**  
**P55001;P55001-2**

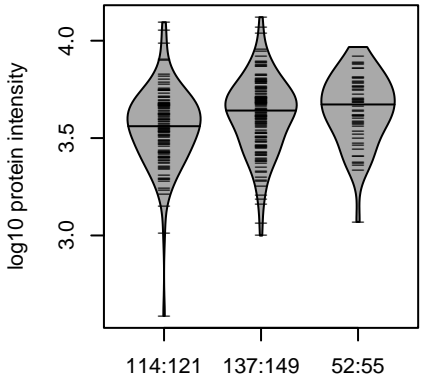

1:17315425:G:A\_A  
 $p = 1e-04$ ,  $\beta = 0.307$ ,  $N = 303$

**TVCAHEELLR pc3**  
**P55001-2;P55001**

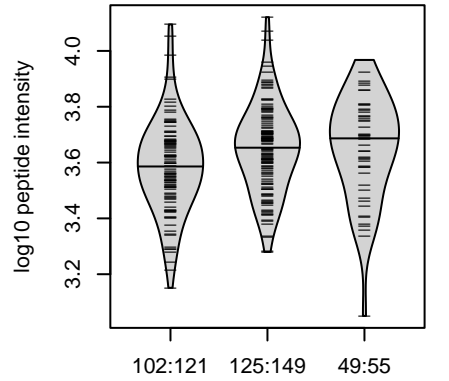

1:17315425:G:A\_A  
 $p = 0.0016$ ,  $\beta = 0.26$ ,  $N = 276$

Assay Target: MFAP2  
Olink UniProt: P55001  
deCODE rsID: rs4920605  
Proxy rsID: rs4920605  
deCODE: 1:16988925!:TGCCO  
Proxy SNP: 1:17315425:G:A  
deCODE log10(p): 275.9  
deCODE BETA: -0.29  
\*.\*.-  
1043:779:224

**KLK7 : NP3**  
**P49862**

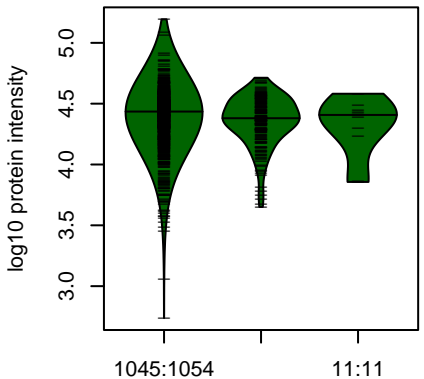

19:51487175:T:G\_T  
p = 0.0075, beta = -0.188, N = 1250

**LISPQDCTK pc2**  
**P49862-2;P49862**

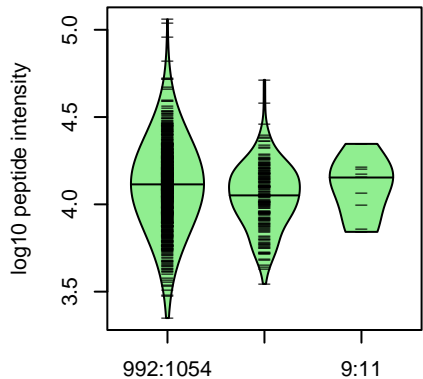

19:51487175:T:G\_T  
p = 0.00049, beta = -0.257, N = 1179

**IIDGAPCAR pc2**  
**P49862**

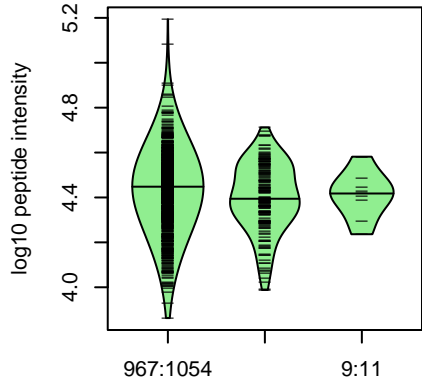

19:51487175:T:G\_T  
p = 0.017, beta = -0.178, N = 1151

**GSPHWQVALLSGNQLHCGGVLVNER**  
**P49862**

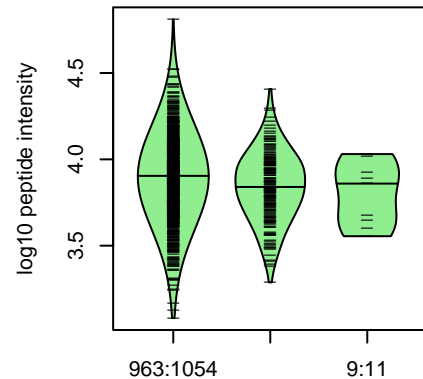

19:51487175:T:G\_T  
p = 0.0017, beta = -0.234, N = 1147

**NACNGDSGGPLVCR pc2**  
**P49862-2;P49862**

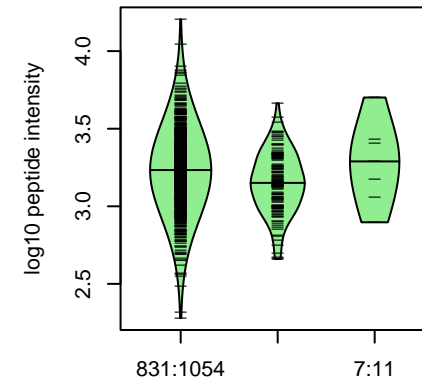

19:51487175:T:G\_T  
p = 0.00051, beta = -0.29, N = 974

**KLK7 : NP3**  
**P49862**

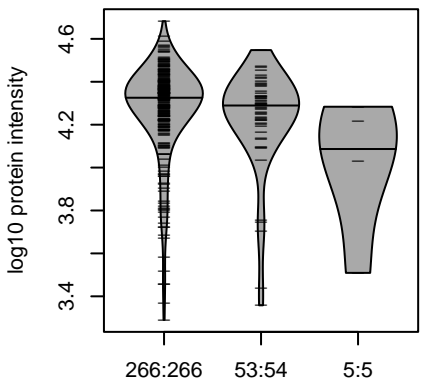

19:51487175:T:G\_T  
p = 0.0027, beta = -0.378, N = 324

**IIDGAPCAR pc2**  
**P49862**

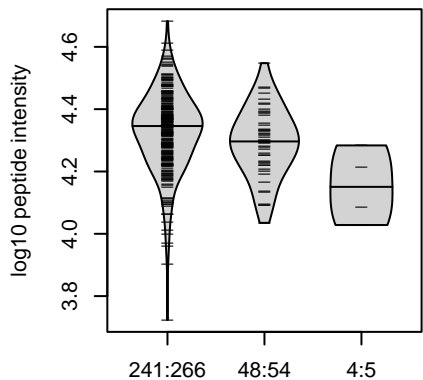

19:51487175:T:G\_T  
p = 0.0034, beta = -0.393, N = 293

**WVLTAHCK pc2**  
**P49862**

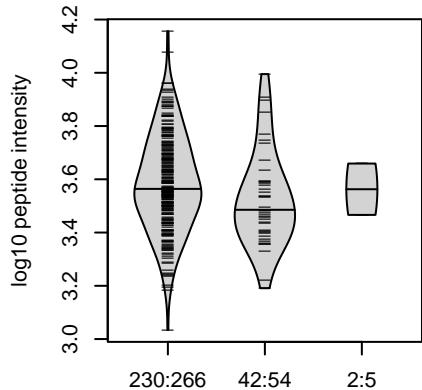

19:51487175:T:G\_T  
p = 0.0078, beta = -0.402, N = 274

**HPGYSTQTHVNDLMLVK pc3**  
**P49862-2;P49862**

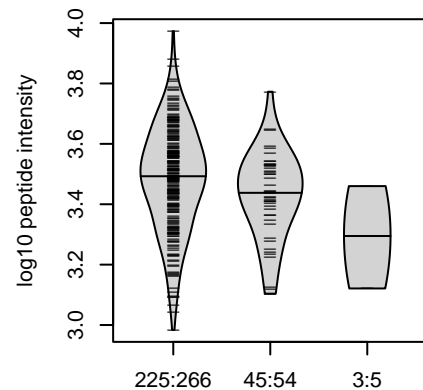

19:51487175:T:G\_T  
p = 0.0034, beta = -0.416, N = 273

**LISPQDCTK pc2**  
**P49862-2;P49862**

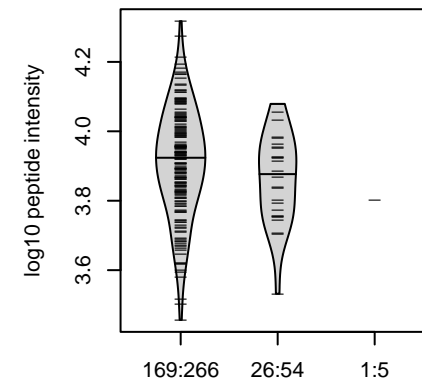

19:51487175:T:G\_T  
p = 0.02, beta = -0.446, N = 196

Assay Target: KLK7  
Olink UniProt: P49862  
deCODE rsID: rs1624358  
Proxy rsID: rs1624358  
deCODE: 19:50983919:T:G  
Proxy SNP: 19:51487175:T:G  
deCODE log10(p): 265.2  
deCODE BETA: -0.53  
\*.-.\*.\*.\*.-.-.-.-  
1179:1151:1147:974:918:702:32

**NRP1 : NP2**  
**O14786**

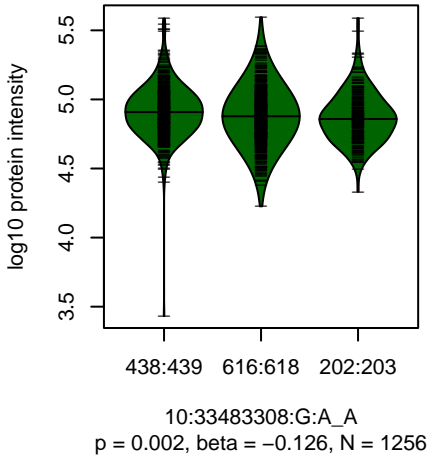

**FVSDYETHGAGFSIR pc3**  
**PEP6;O14786;O14786-2;O14786-3;Q5;O14786;O14786-2;O14786-3;Q5JW(PEP6;O14786;O14786-2;O14786-3;QPEP6;O14786;O14786-2;O14786-3;Q**

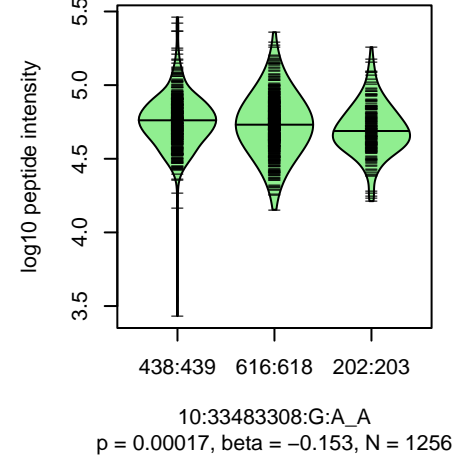

**FVTAVGTQGAISK pc2**

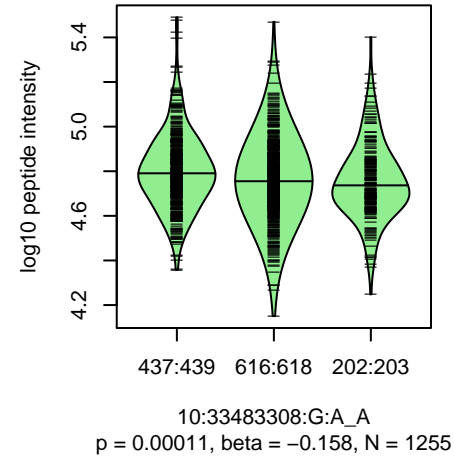

**IAPPPVSSGPFLFIK pc2**

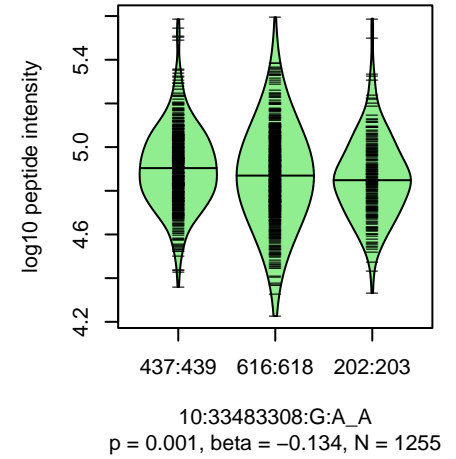

**IESPGYLTSPGYPHSYHPSEK pc4**

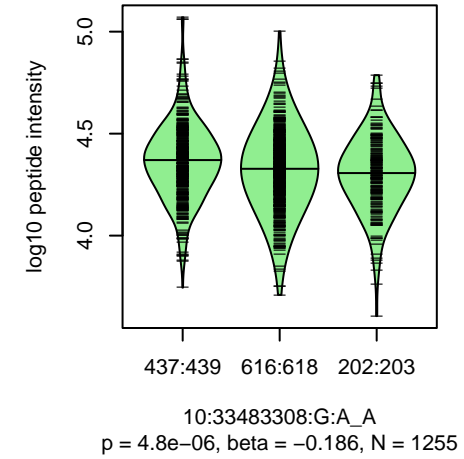

**EWIQVDLGLLR pc3**

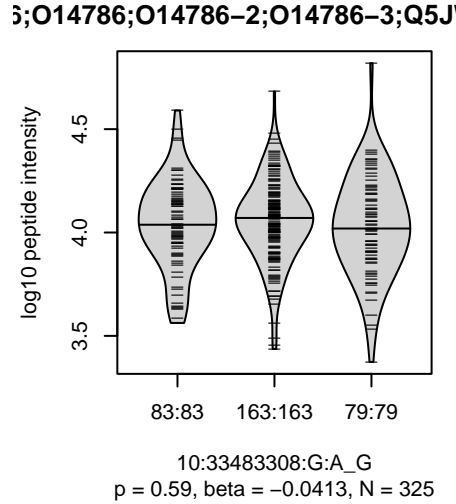

**FVSDYETHGAGFSIR pc3**

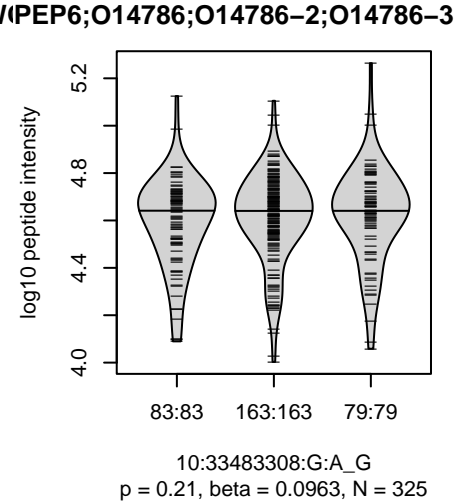

**IESPGYLTSPGYPHSYHPSEK pc4**

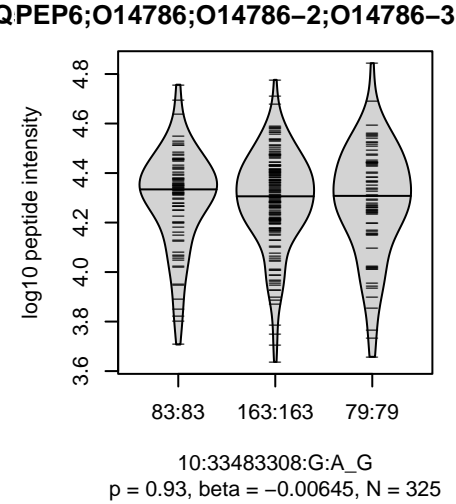

**SSSGILSMVFYTDSIAIK pc2**

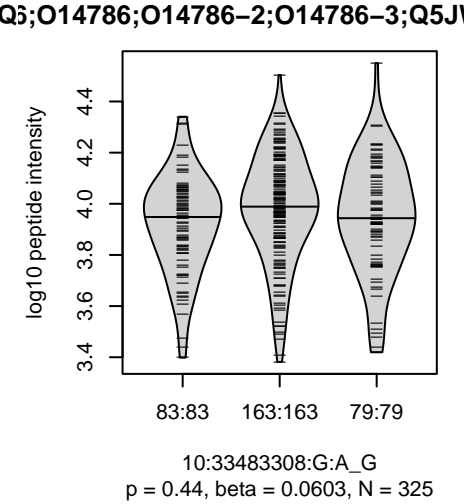

Assay Target: NRP1  
Olink UniProt: O14786  
deCODE rsID: rs2506150  
Proxy rsID: rs2506150  
deCODE: 10:33194380:A:G  
Proxy SNP: 10:33483308:G:A  
deCODE log10(p): 265.1  
deCODE BETA: -0.3  
\*\*\*\*\*\_\*\*\*\*\*\_\*\*\*\*\*\_\*\*\*\*\*\_\*\*\*\*\*  
1256:1255:1255:1255:1255:125

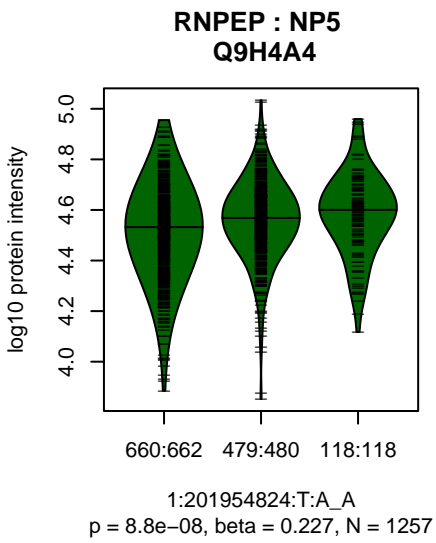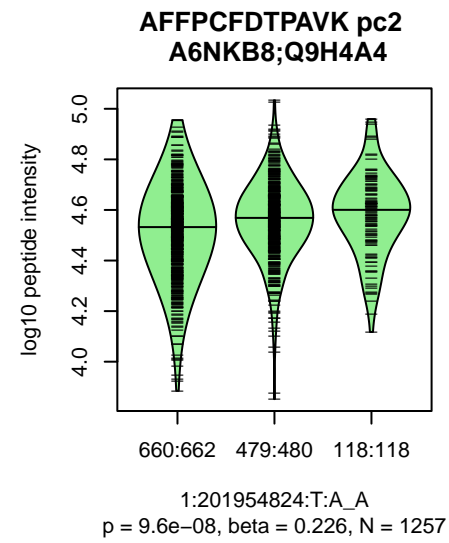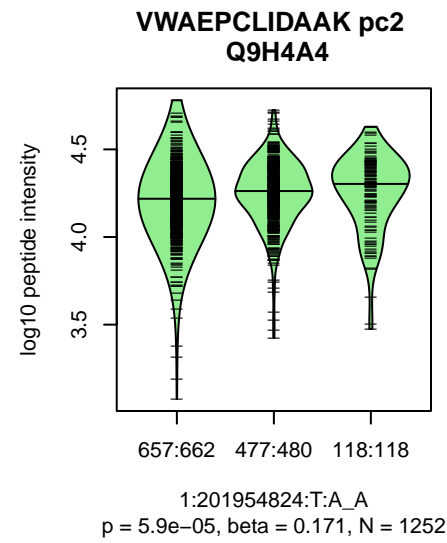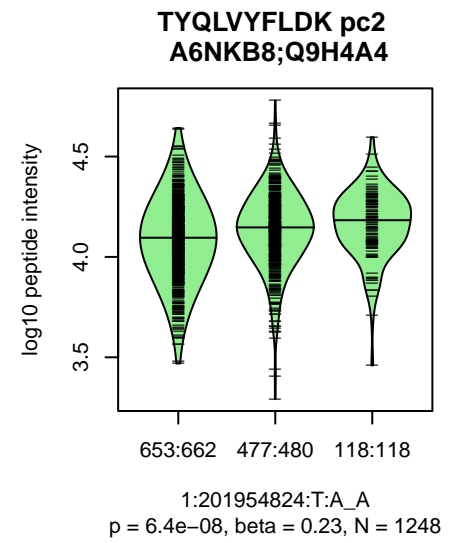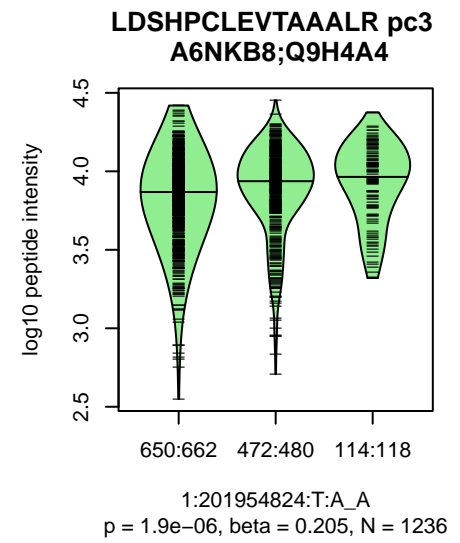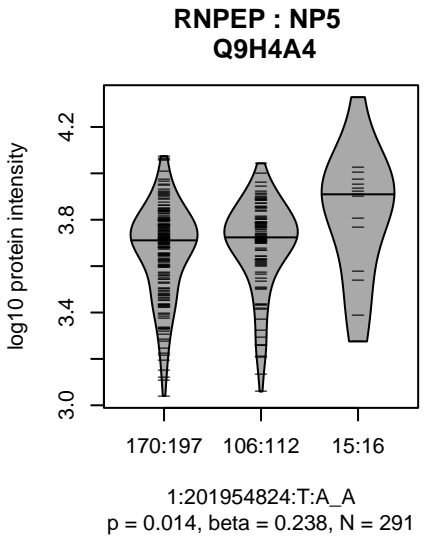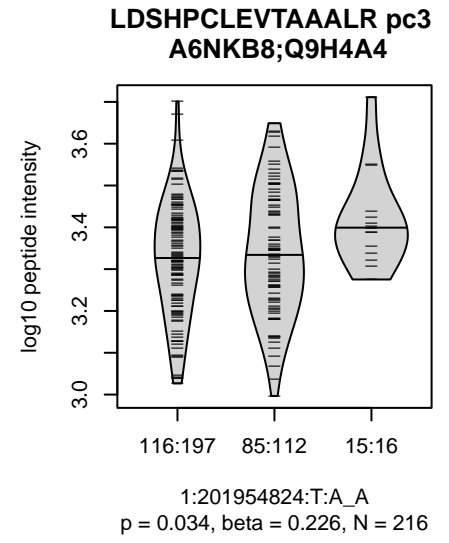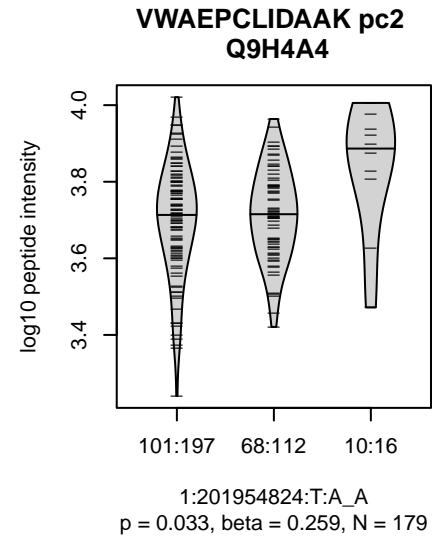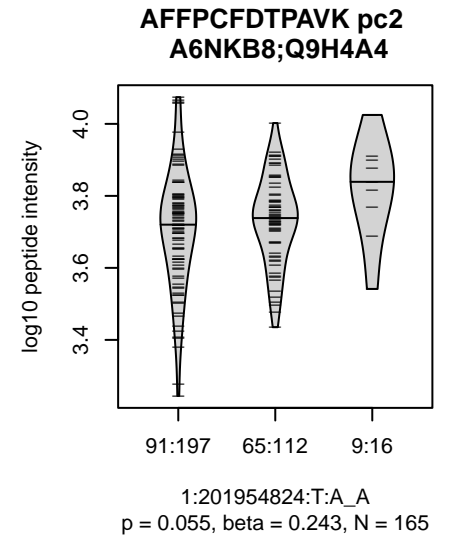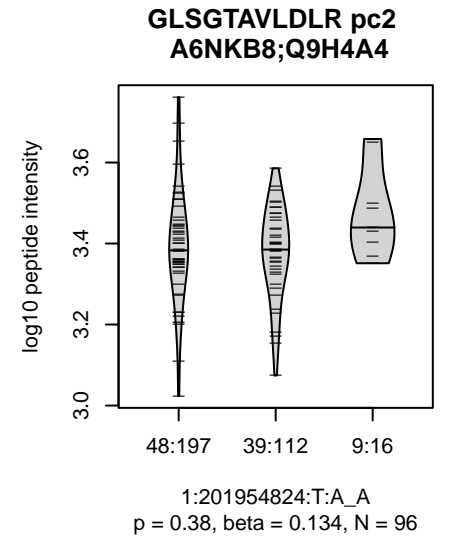

Assay Target: RNPEP  
 Olink UniProt: Q9H4A4  
 deCODE rsID: rs6702334  
 Proxy rsID: rs6702334  
 deCODE: 1:201985696:A:T  
 Proxy SNP: 1:201954824:T:A  
 deCODE log10(p): 254.2  
 deCODE BETA: 0.29  
 .....  
 1257:1252:1248:1236:1216:121

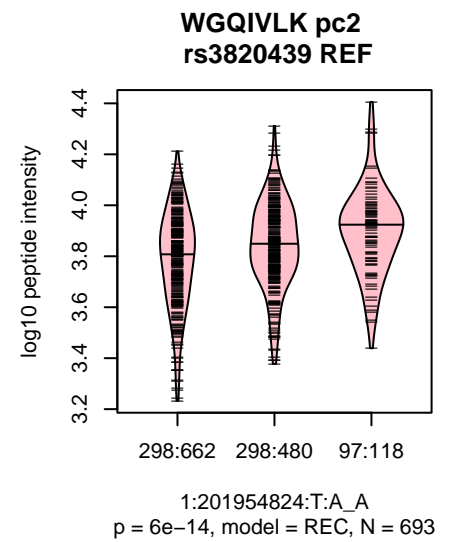



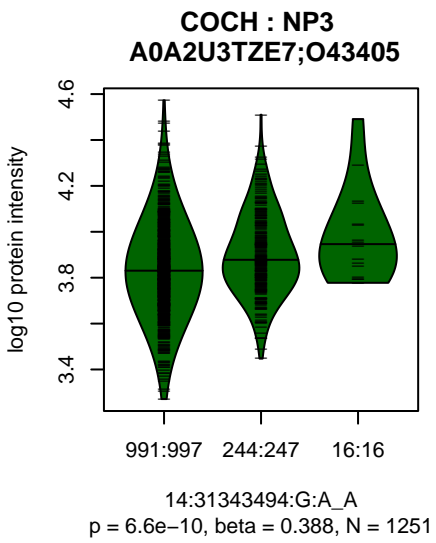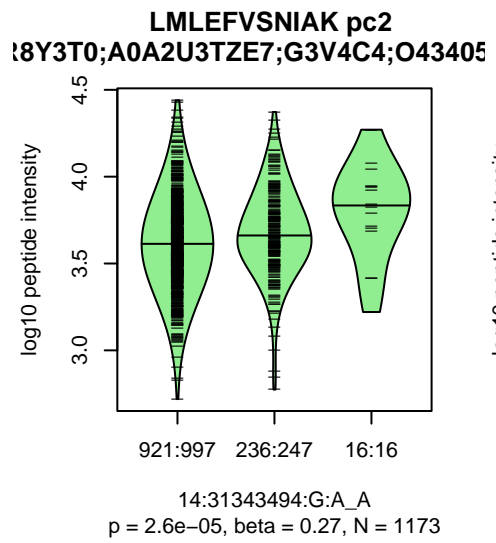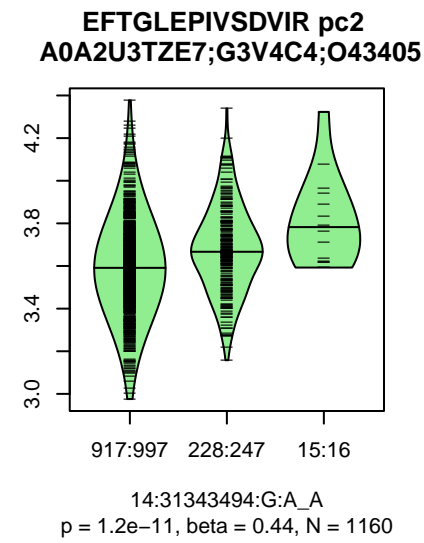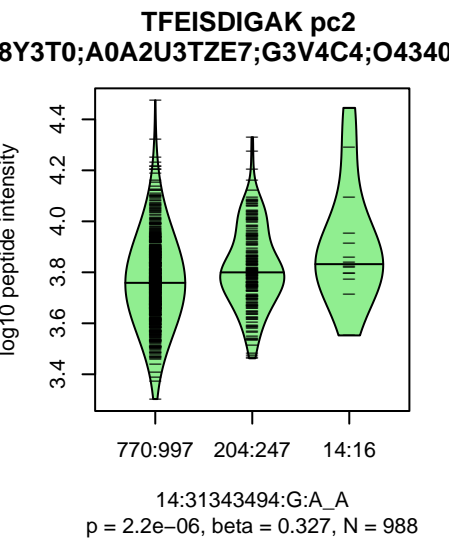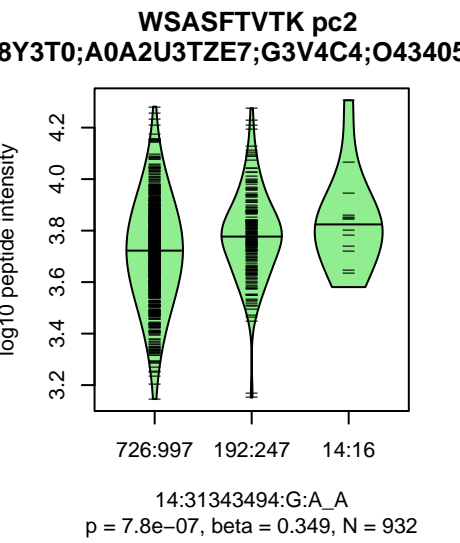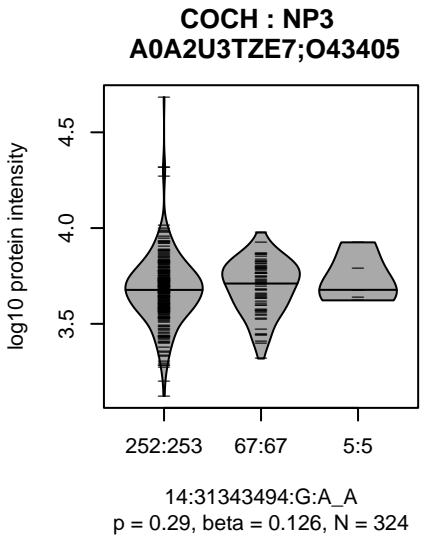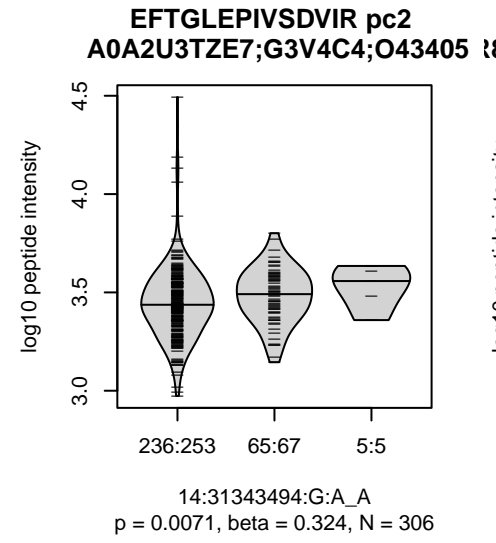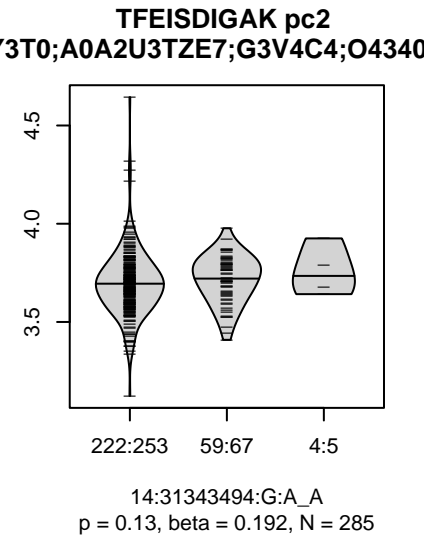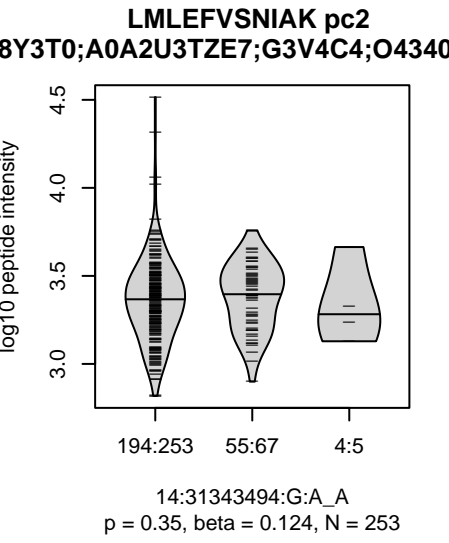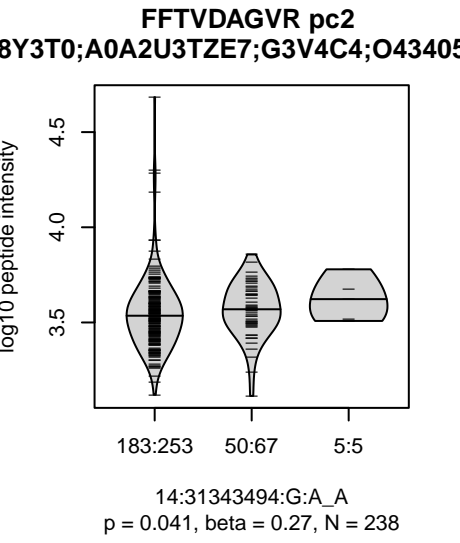

Assay Target: COCH  
Olink UniProt: O43405  
deCODE rsID: rs28400019  
Proxy rsID: rs28400019  
deCODE: 14:30874288:A:G  
Proxy SNP: 14:31343494:G:A  
deCODE log10(p): 251.5  
deCODE BETA: 0.44  
\*\*\*\*\*-:-  
1173:1160:988:932:900:896:890

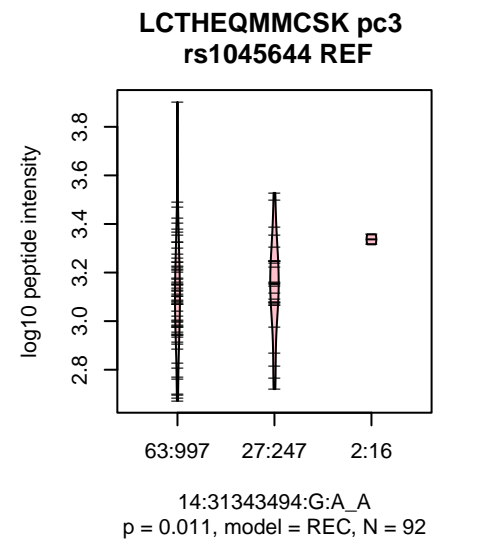

**CHST11 : NP4**  
Q9NPF2;Q9NPF2-2

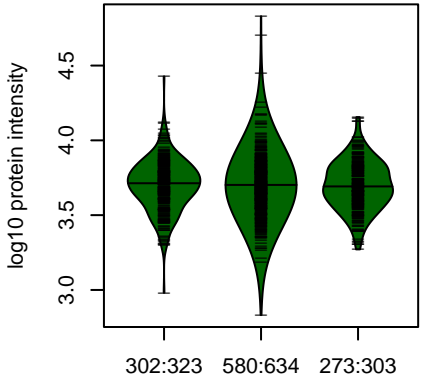

12:104981657:A:G\_G  
p = 0.56, beta = -0.0241, N = 1155

**VACTNWK pc2**  
Q8NET6;Q9NPF2-2;Q9NPF2;Q9NR1

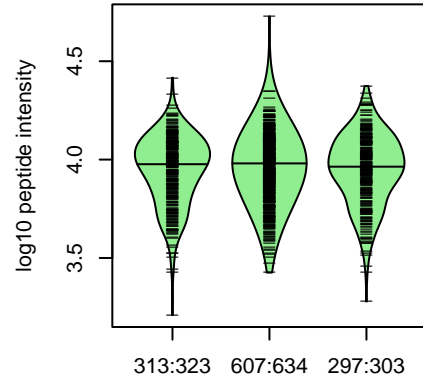

12:104981657:A:G\_G  
p = 0.84, beta = -0.00833, N = 1217

**TLNQYSIPEINHR pc3**  
Q9NPF2-2;Q9NPF2

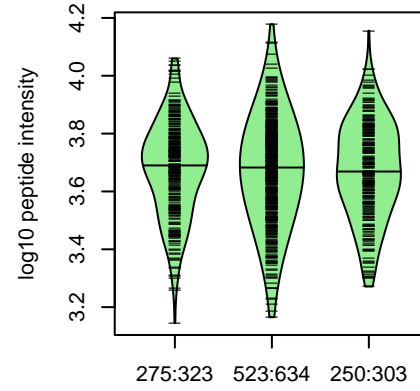

12:104981657:A:G\_G  
p = 0.33, beta = -0.0422, N = 1048

**YSDPMEIPANEAHVSANLK pc3**  
Q9NPF2-2;Q9NPF2

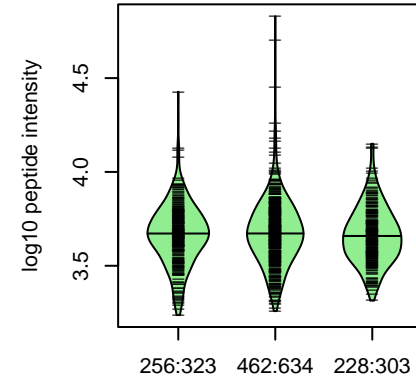

12:104981657:A:G\_G  
p = 0.81, beta = -0.0108, N = 946

**HLVVDDEHELIYCYVPK pc3**  
Q9NPF2-2;Q9NPF2

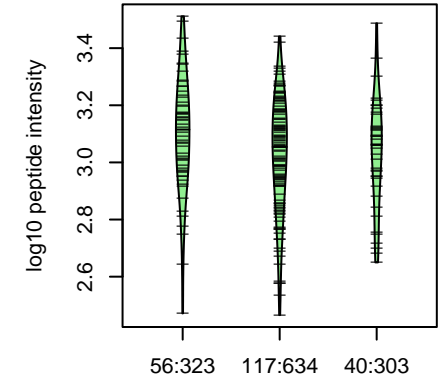

12:104981657:A:G\_G  
p = 0.11, beta = -0.161, N = 213

Assay Target: CHST11  
Olink UniProt: Q9NPF2  
deCODE rsID: rs1650132  
Proxy rsID: rs1650132  
deCODE: 12:104587879:G:A  
Proxy SNP: 12:104981657:A:G  
deCODE log10(p): 250.7  
deCODE BETA: -0.28  
-:-:-:-  
1217:1048:946:213

**PDGFD : NP3**  
**Q9GZP0**

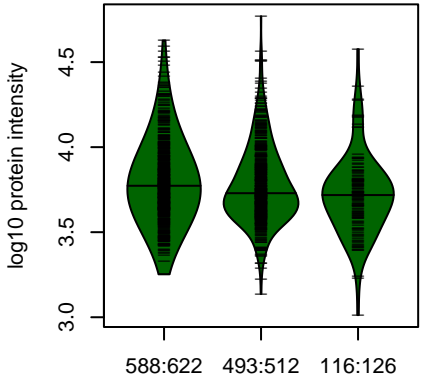

11:104031598:C:G\_G  
p = 4e-04, beta = -0.154, N = 1197

**LANVFFPR pc2**  
**Q9GZP0;Q9GZP0-2**

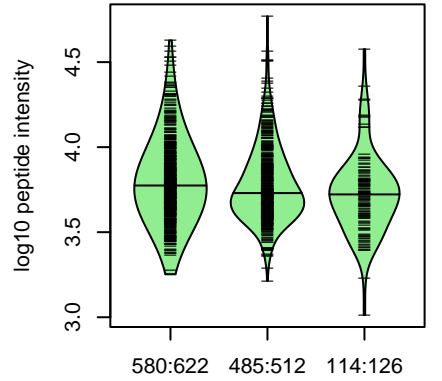

11:104031598:C:G\_G  
p = 0.00075, beta = -0.148, N = 1179

**YHEVLQFEPGHIK pc3**  
**Q9GZP0;Q9GZP0-2**

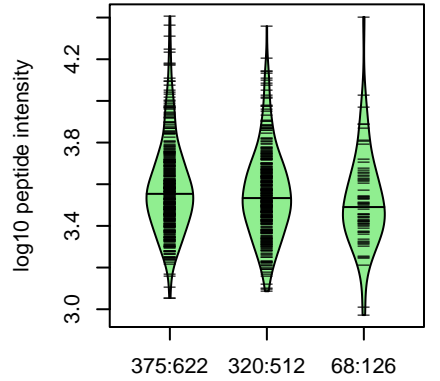

11:104031598:C:G\_G  
p = 0.026, beta = -0.124, N = 763

**TMALVDIQLDHHHER pc3**  
**Q9GZP0;Q9GZP0-2**

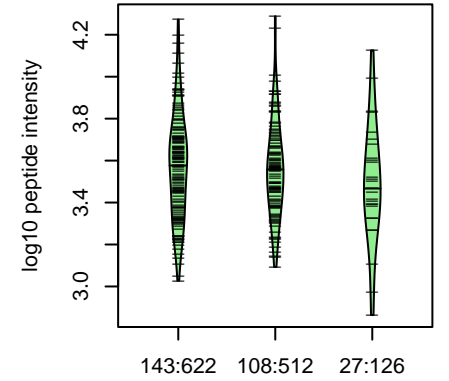

11:104031598:C:G\_G  
p = 0.38, beta = -0.0781, N = 278

**NLLLTWR pc2**  
**Q9GZP0;Q9GZP0-2**

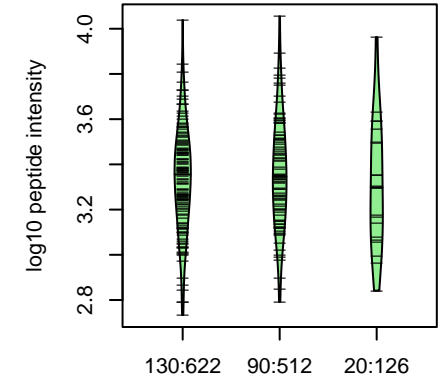

11:104031598:C:G\_G  
p = 0.88, beta = 0.0153, N = 240

**PDGFD : NP3**  
**Q9GZP0;Q9GZP0-2**

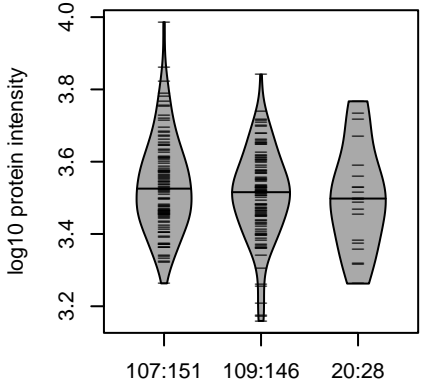

11:104031598:C:G\_G  
p = 0.16, beta = -0.143, N = 236

**LANVFFPR pc2**  
**Q9GZP0;Q9GZP0-2**

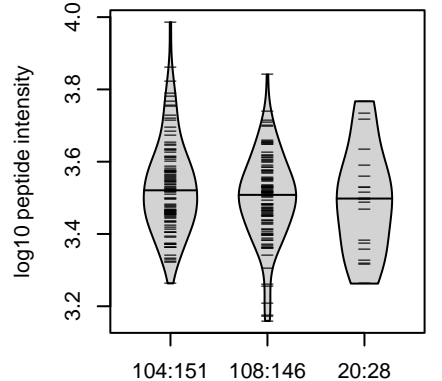

11:104031598:C:G\_G  
p = 0.11, beta = -0.161, N = 232

**YHEVLQFEPGHIK pc3**  
**Q9GZP0;Q9GZP0-2**

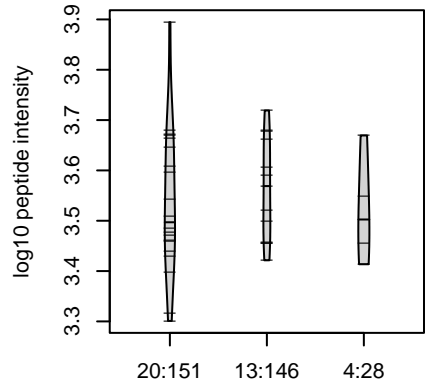

11:104031598:C:G\_G  
p = 0.49, beta = 0.157, N = 37

Assay Target: PDGFD  
Olink UniProt: Q9GZP0  
deCODE rsID: rs7950273  
Proxy rsID: rs7950273  
deCODE: 11:104160870:G:C  
Proxy SNP: 11:104031598:C:G  
deCODE log10(p): 250.6  
deCODE BETA: -0.3  
\*:-:-:-:NA:NA:NA:NA  
1179:763:278:240:198:8:7:13:3



**SMOC2 : NP3**  
**Q9H3U7;Q9H3U7-2**

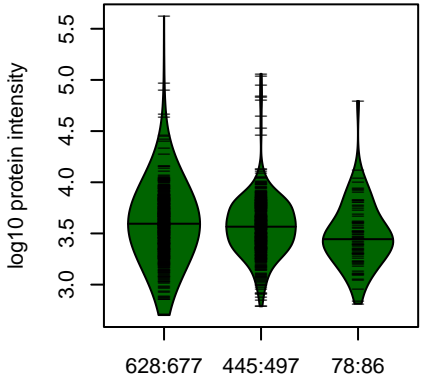

6:168863807:T:C\_C  
 $p = 0.0085$ ,  $\beta = -0.124$ ,  $N = 1151$

**FSALTFLR pc2**  
**Q9H3U7;Q9H3U7-2**

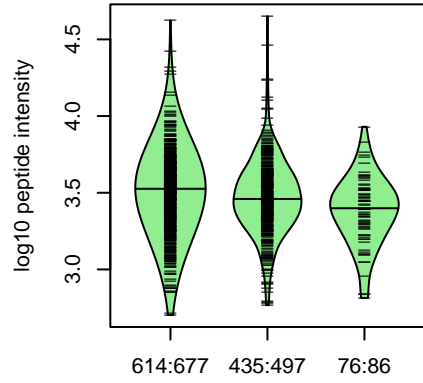

6:168863807:T:C\_C  
 $p = 5.2e-05$ ,  $\beta = -0.193$ ,  $N = 1125$

**PLCASDGR pc2**  
**Q9H3U7;Q9H3U7-2**

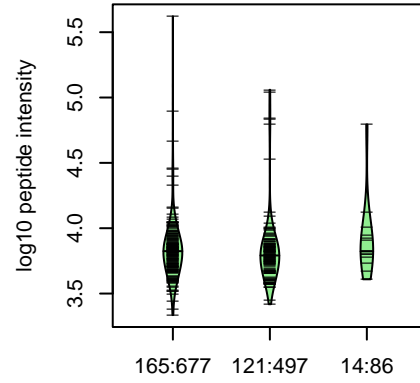

6:168863807:T:C\_C  
 $p = 0.83$ ,  $\beta = 0.0206$ ,  $N = 300$

**DPQLEIAYR pc2**  
**Q9H3U7;Q9H3U7-2**

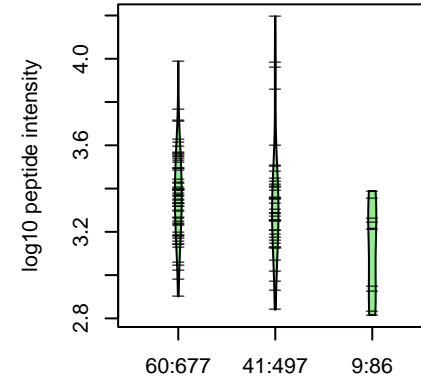

6:168863807:T:C\_C  
 $p = 0.19$ ,  $\beta = -0.189$ ,  $N = 110$

**YPTLWTEQVK pc2**  
**Q9H3U7;Q9H3U7-2**

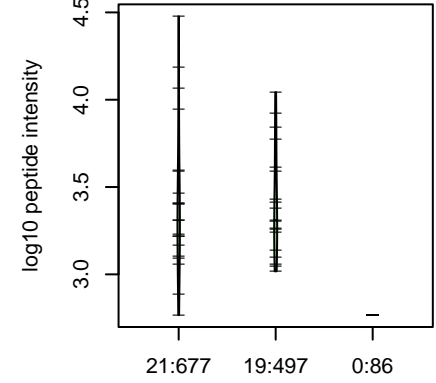

6:168863807:T:C\_C  
 $p = 0.72$ ,  $\beta = -0.106$ ,  $N = 40$

Assay Target: SMOC2  
 Olink UniProt: Q9H3U7  
 deCODE rsID: rs56296467  
 Proxy rsID: rs56296467  
 deCODE: 6:168463127:C:T  
 Proxy SNP: 6:168863807:T:C  
 deCODE  $\log_{10}(p)$ : 243.7  
 deCODE BETA: -0.31  
 \*:-:-:-:-:NA:NA:NA:NA:NA:N  
 1125:300:110:40:38:21:15:11:3:

**PI3 : NP3  
P19957**

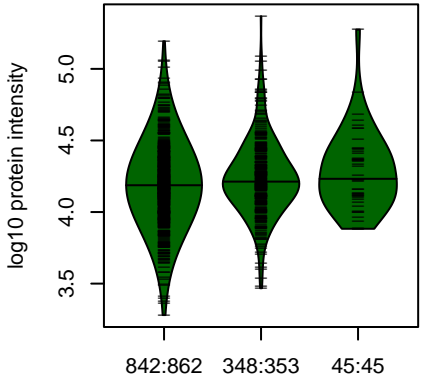

20:43777506:C:T\_T  
 $\rho = 7.2e-05$ ,  $\beta = 0.204$ ,  $N = 1235$

**PGSCPIILIR pc2  
P19957**

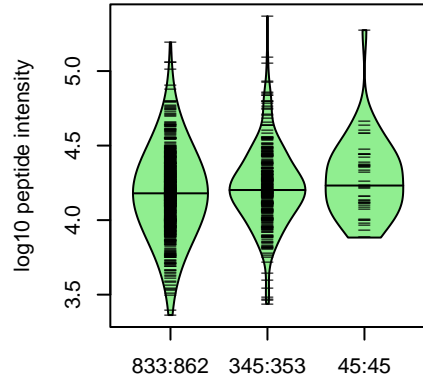

20:43777506:C:T\_T  
 $\rho = 0.00022$ ,  $\beta = 0.19$ ,  $N = 1223$

**CAMLNPPNR pc2  
P19957**

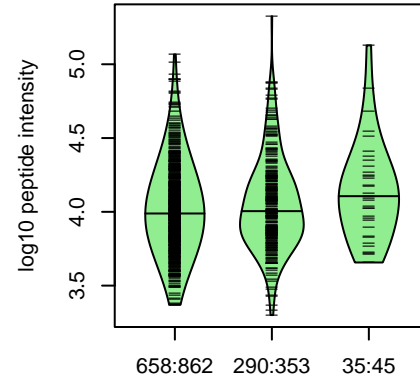

20:43777506:C:T\_T  
 $\rho = 0.0037$ ,  $\beta = 0.167$ ,  $N = 983$

**VPFNGQDPVK pc2  
P19957**

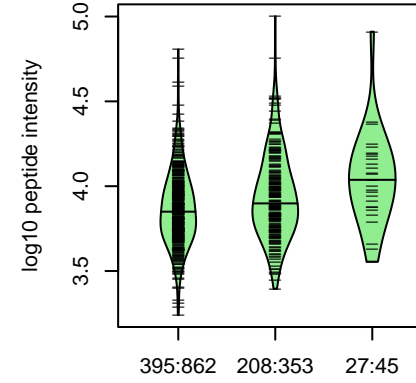

20:43777506:C:T\_T  
 $\rho = 1.3e-07$ ,  $\beta = 0.36$ ,  $N = 630$

**DTDCPGIK pc2  
P19957**

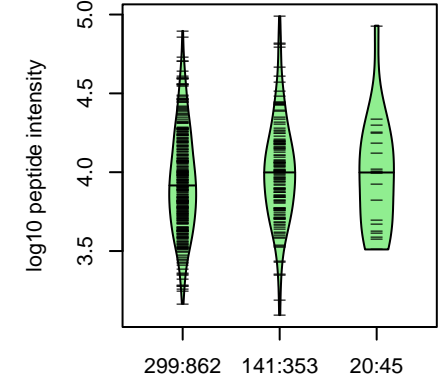

20:43777506:C:T\_T  
 $\rho = 0.063$ ,  $\beta = 0.15$ ,  $N = 460$

**PI3 : NP3  
P19957**

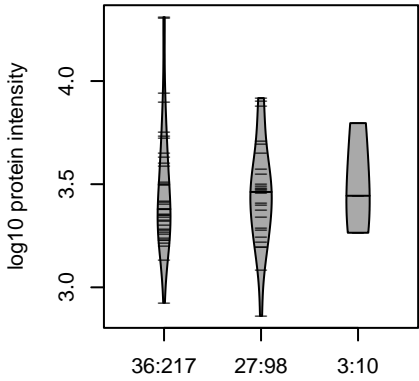

20:43777506:C:T\_T  
 $\rho = 0.49$ ,  $\beta = -0.14$ ,  $N = 66$

**PGSCPIILIR pc2  
P19957**

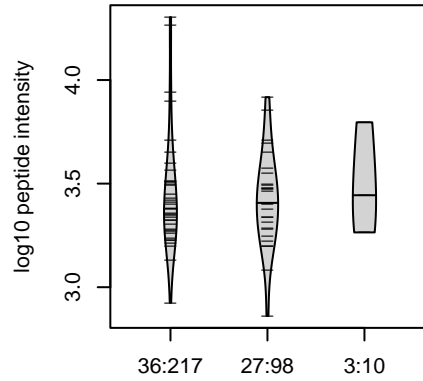

20:43777506:C:T\_T  
 $\rho = 0.46$ ,  $\beta = -0.15$ ,  $N = 66$

Assay Target: PI3  
 Olink UniProt: P19957  
 deCODE rsID: rs17332620  
 Proxy rsID: rs17332620  
 deCODE: 20:45148865:T:C  
 Proxy SNP: 20:43777506:C:T  
 deCODE  $\log_{10}(p)$ : 241.6  
 deCODE BETA: 0.34  
 \*.\*.\*.-.-  
 1223:983:630:460:31



**MYOC : NP2  
Q99972**

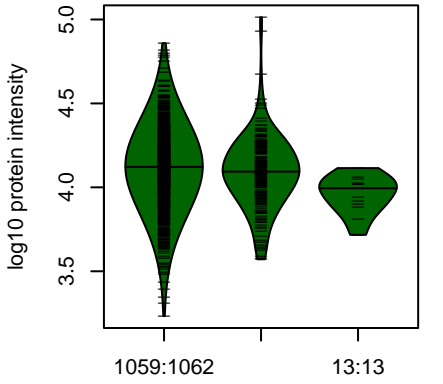

1:171617765:G:A\_A  
p = 0.00018, beta = -0.263, N = 1255

**ELETAYSNLLR pc2  
Q99972**

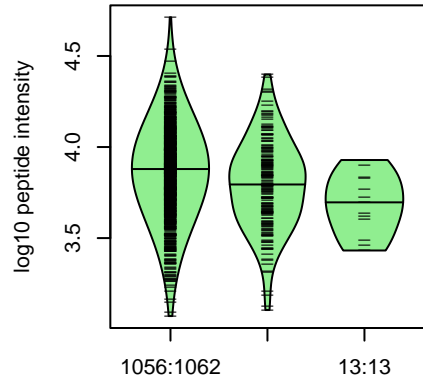

1:171617765:G:A\_A  
p = 4e-07, beta = -0.356, N = 1251

**YELNTETVK pc2  
Q99972**

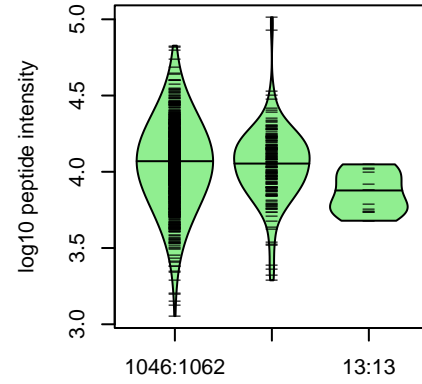

1:171617765:G:A\_A  
p = 0.0035, beta = -0.206, N = 1239

**SELTEVPASR pc2  
Q99972**

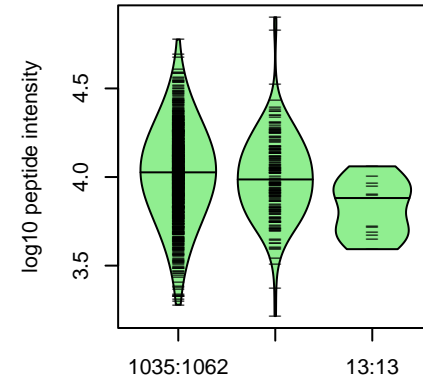

1:171617765:G:A\_A  
p = 0.00063, beta = -0.242, N = 1227

**YSSMIDYNPLEK pc2  
Q99972**

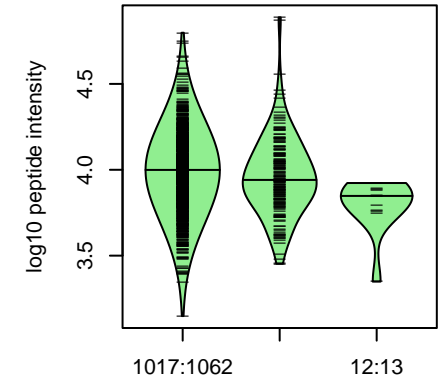

1:171617765:G:A\_A  
p = 0.00029, beta = -0.261, N = 1205

**MYOC : NP2  
Q99972**

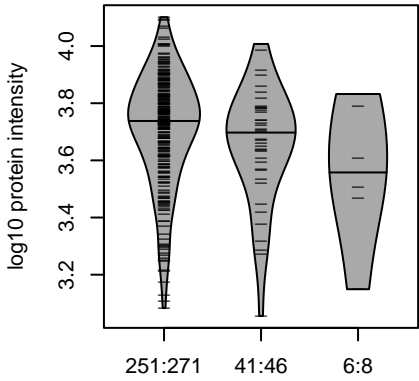

1:171617765:G:A\_A  
p = 0.058, beta = -0.25, N = 298

**ELETAYSNLLR pc2  
Q99972**

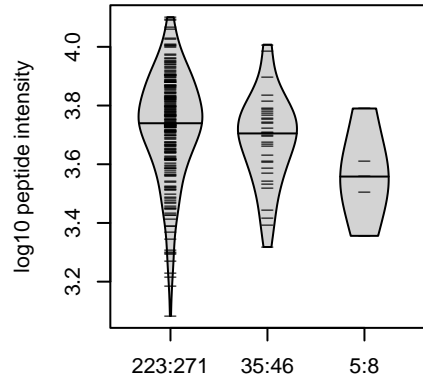

1:171617765:G:A\_A  
p = 0.039, beta = -0.295, N = 263

**YELNTETVK pc2  
Q99972**

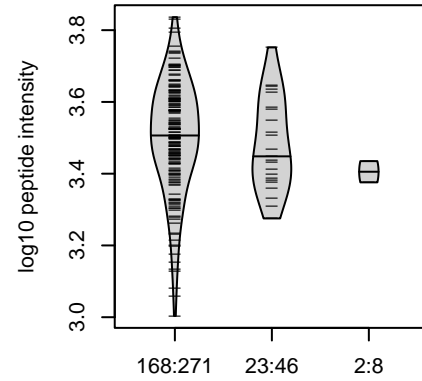

1:171617765:G:A\_A  
p = 0.25, beta = -0.214, N = 193

**IDTVGTDVR pc2  
Q99972**

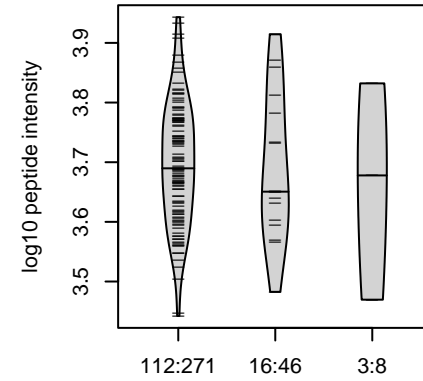

1:171617765:G:A\_A  
p = 0.63, beta = -0.0948, N = 131

**LEAWDNLNMVTDYDIK pc2  
Q99972**

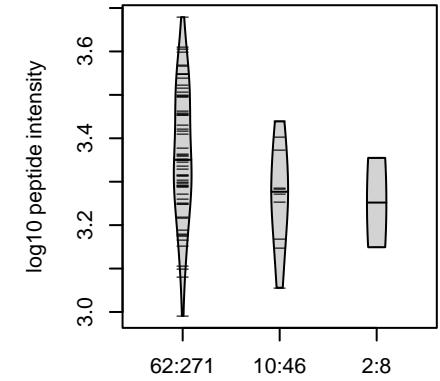

1:171617765:G:A\_A  
p = 0.15, beta = -0.35, N = 74

Assay Target: MYOC  
Olink UniProt: Q99972  
deCODE rsID: rs7547721  
Proxy rsID: rs7547721  
deCODE: 1:171648625:A:G  
Proxy SNP: 1:171617765:G:A  
deCODE log10(p): 238.1  
deCODE BETA: -0.49  
\*\*\*  
1251:1239:1227:1205:1191:114







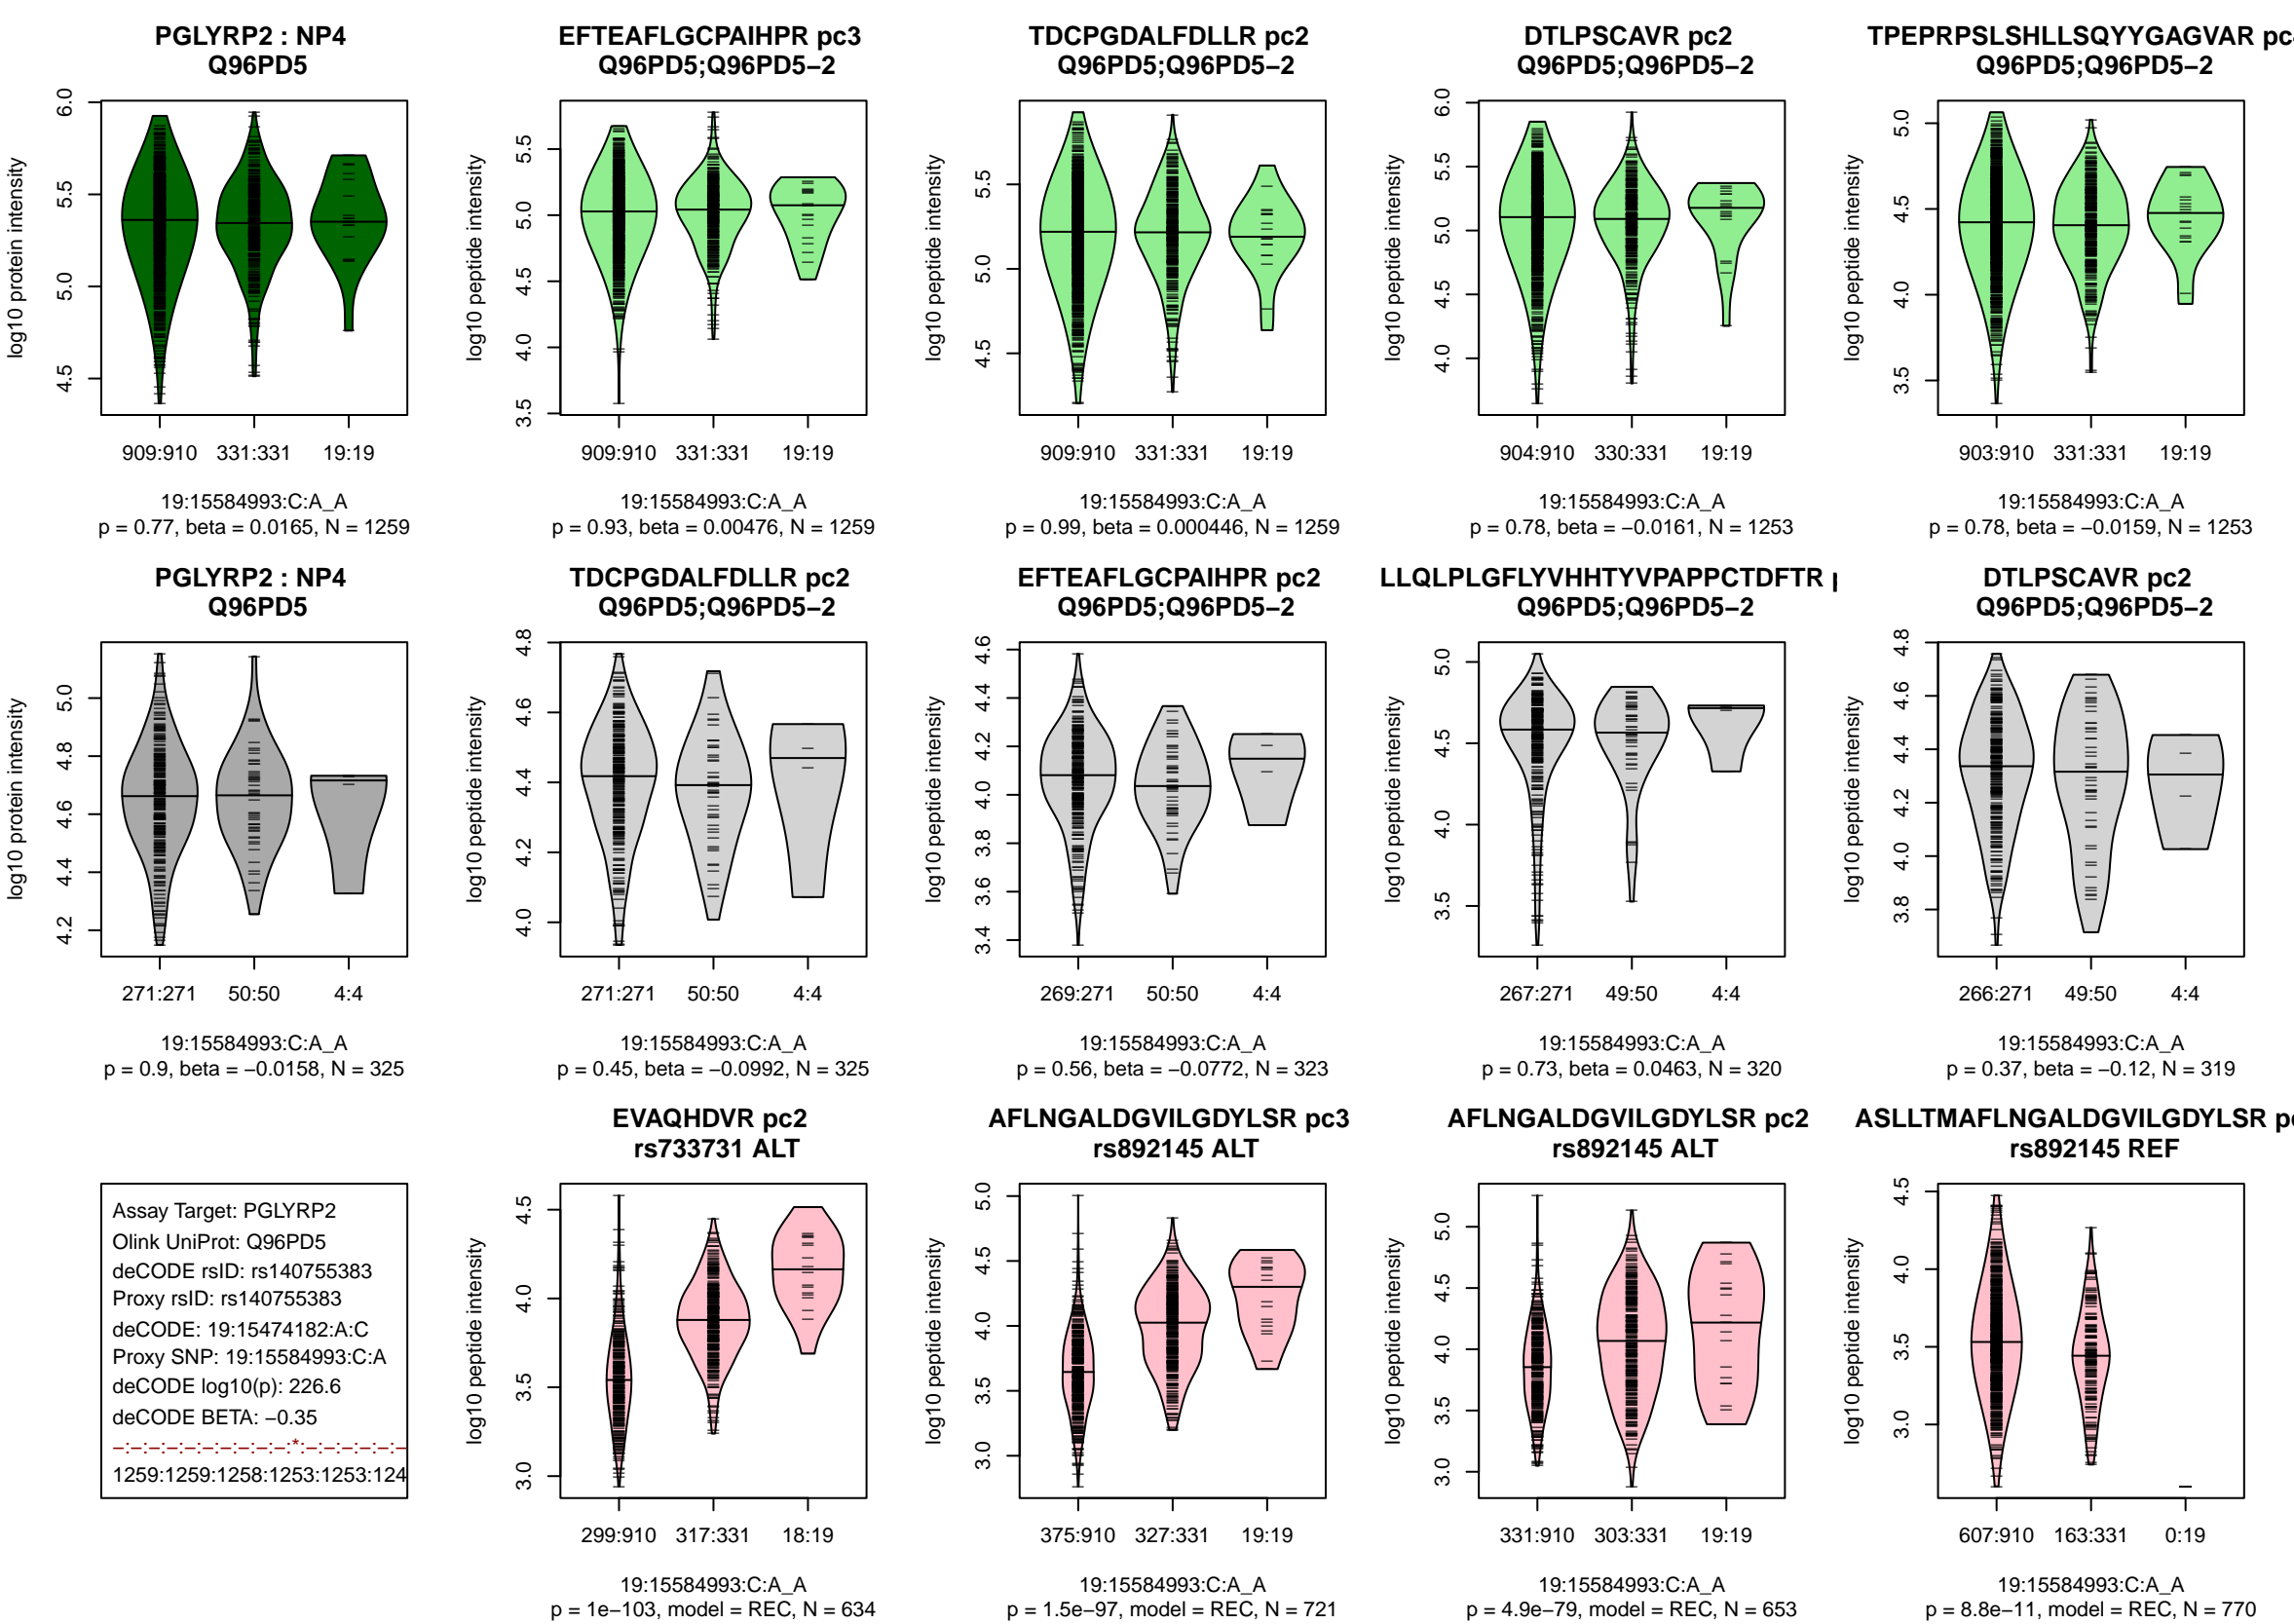



**GCA : NP2**  
**H7BXD5;P28676**

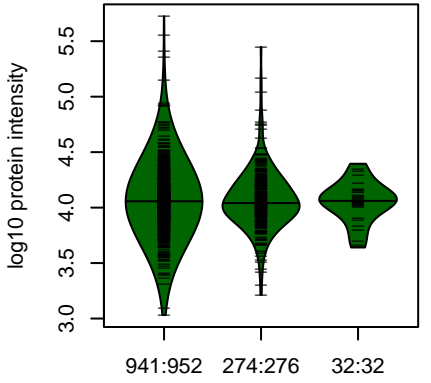

2:163208893:T\_G\_G  
p = 0.86, beta = -0.0103, N = 1247

**LSPQTLTTIVK pc2**  
**H7BXD5;P28676**

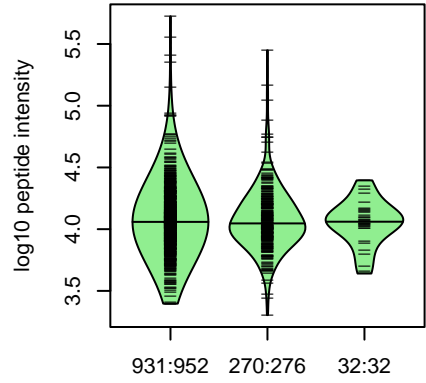

2:163208893:T\_G\_G  
p = 0.78, beta = -0.0161, N = 1233

**ELWAALNAWK pc2**  
**H7BXD5;P28676**

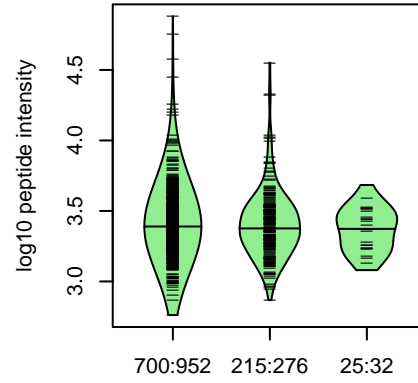

2:163208893:T\_G\_G  
p = 0.53, beta = -0.04, N = 940

**IFFDDYVACCVK pc2**  
**H7BXD5;P28676**

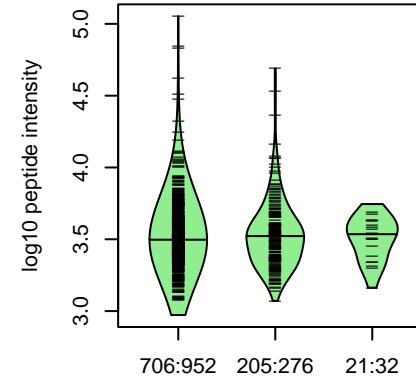

2:163208893:T\_G\_G  
p = 0.75, beta = 0.0215, N = 932

**ALTDFFR pc2**  
**H7BXD5;P28676**

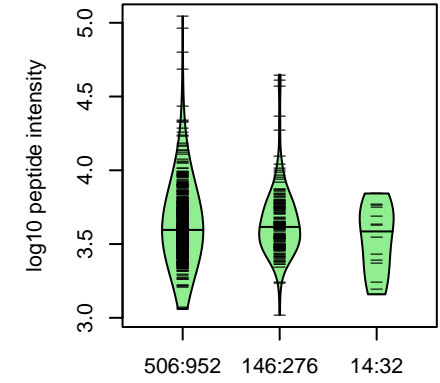

2:163208893:T\_G\_G  
p = 0.64, beta = 0.0375, N = 666

**GCA : NP2**  
**H7BXD5;P28676**

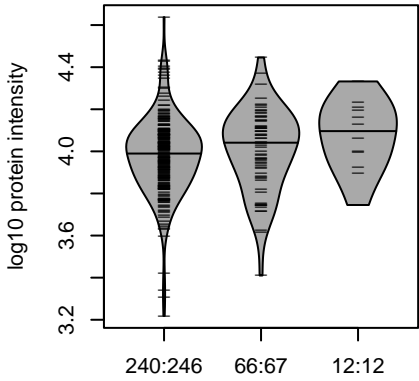

2:163208893:T\_G\_G  
p = 0.12, beta = 0.165, N = 318

**LSPQTLTTIVK pc2**  
**H7BXD5;P28676**

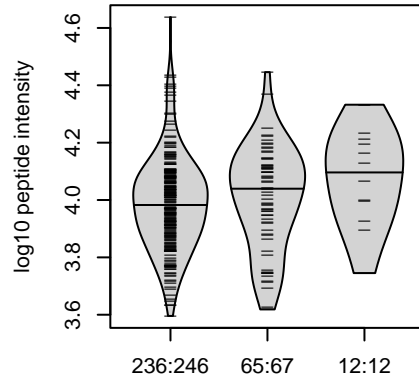

2:163208893:T\_G\_G  
p = 0.13, beta = 0.161, N = 313

**IFFDDYVACCVK pc2**  
**H7BXD5;P28676**

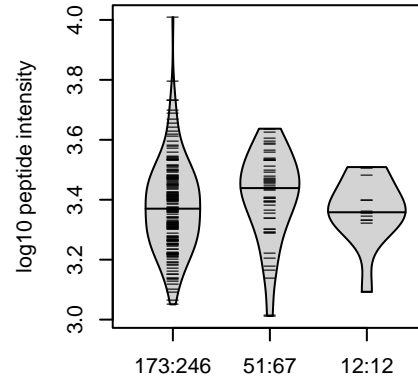

2:163208893:T\_G\_G  
p = 0.58, beta = 0.0636, N = 236

Assay Target: GCA  
Olink UniProt: P28676  
deCODE rsID: rs17783344  
Proxy rsID: rs17783344  
deCODE: 2:162352383:G:T  
Proxy SNP: 2:163208893:T:G  
deCODE log10(p): 222.1  
deCODE BETA: -0.43  
- - - - -  
1233:940:932:666:349:185:128:

**FCER2 : NP2  
P06734**

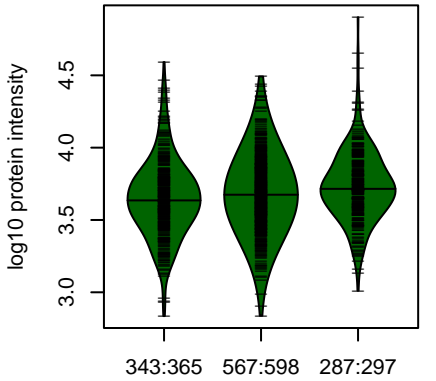

19:7761812:A:G\_A  
 $p = 2.2e-05$ ,  $\beta = 0.168$ ,  $N = 1197$

**SQGEDCVMMR pc2  
K3W4U1;P06734**

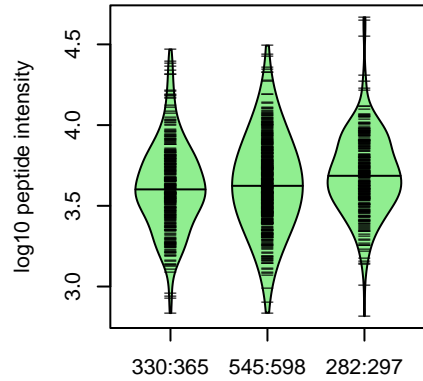

19:7761812:A:G\_A  
 $p = 0.00024$ ,  $\beta = 0.148$ ,  $N = 1157$

**LGAWVCDR pc2  
K3W4U1;P06734**

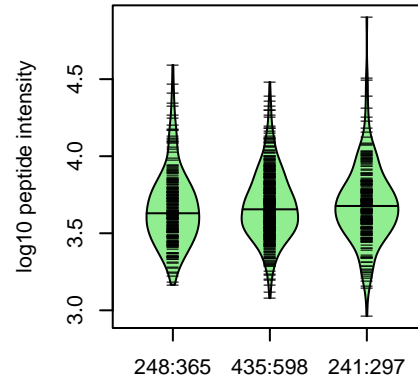

19:7761812:A:G\_A  
 $p = 0.1$ ,  $\beta = 0.0738$ ,  $N = 924$

**SQSTQISQELEELRAEQQR pc3  
K3W4U1;P06734**

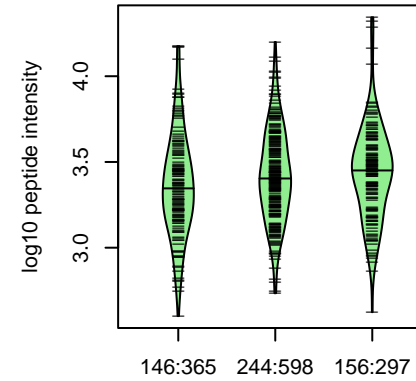

19:7761812:A:G\_A  
 $p = 0.017$ ,  $\beta = 0.136$ ,  $N = 546$

**HASHTGSWIGLR pc3  
K3W4U1;P06734**

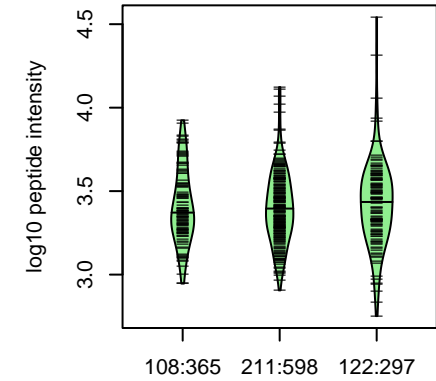

19:7761812:A:G\_A  
 $p = 0.74$ ,  $\beta = 0.0215$ ,  $N = 441$

**FCER2 : NP2  
P06734**

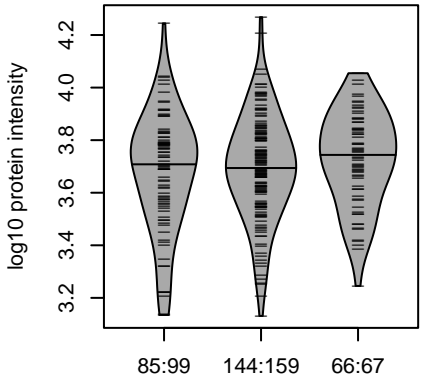

19:7761812:A:G\_A  
 $p = 0.098$ ,  $\beta = 0.133$ ,  $N = 295$

**LGAWVCDR pc2  
K3W4U1;P06734**

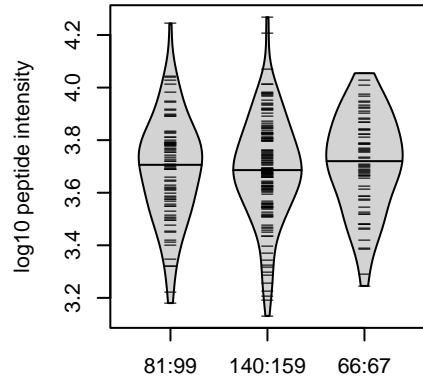

19:7761812:A:G\_A  
 $p = 0.29$ ,  $\beta = 0.0869$ ,  $N = 287$

**SQGEDCVMMR pc2  
K3W4U1;P06734**

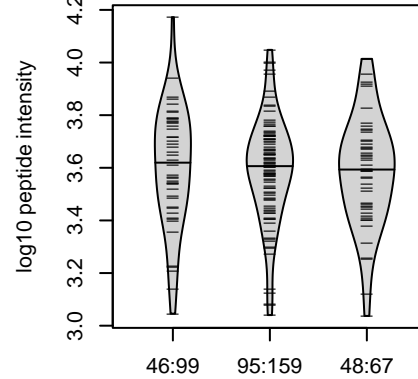

19:7761812:A:G\_A  
 $p = 0.84$ ,  $\beta = -0.0205$ ,  $N = 189$

**SQSTQISQELEELRAEQQR pc3  
K3W4U1;P06734**

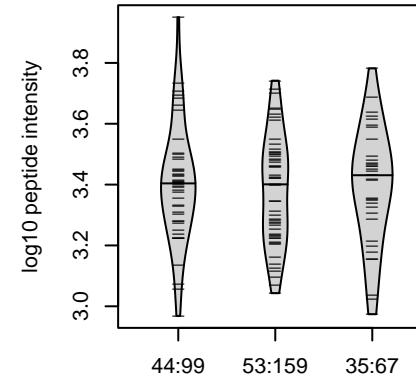

19:7761812:A:G\_A  
 $p = 1$ ,  $\beta = -0.00067$ ,  $N = 132$

Assay Target: FCER2  
Olink UniProt: P06734  
deCODE rsID: rs2277989  
Proxy rsID: rs2277989  
deCODE: 19:7696926:G:A  
Proxy SNP: 19:7761812:A:G  
deCODE  $\log_{10}(p)$ : 217.9  
deCODE BETA: -0.27  
\*:-:-:-:-  
1157:924:546:441:205

**ST3GAL1 : NP4  
Q11201**

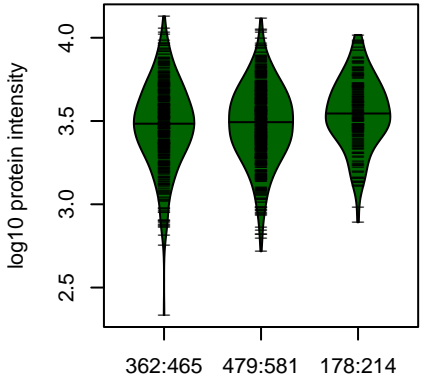

8:134503148:C:T\_C  
p = 0.0041, beta = 0.127, N = 1019

**CAVVGNSGNLR pc2  
Q11201;Q16842**

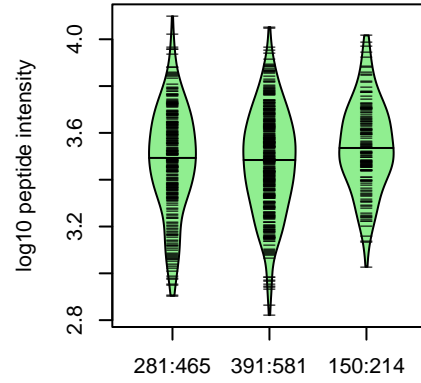

8:134503148:C:T\_C  
p = 0.016, beta = 0.118, N = 822

**QMVLELSENLK pc2  
Q11201**

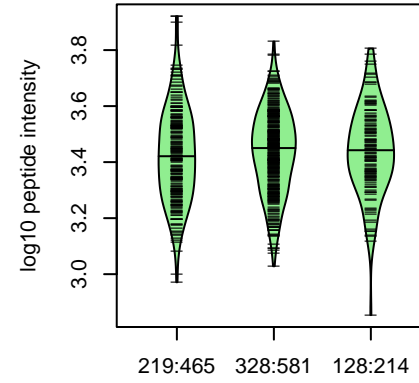

8:134503148:C:T\_C  
p = 0.26, beta = 0.0609, N = 675

**APTAGFEADVGTK pc2  
Q11201**

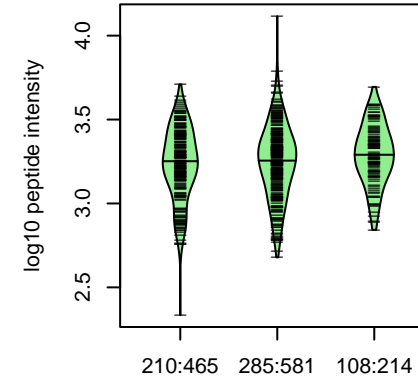

8:134503148:C:T\_C  
p = 0.025, beta = 0.128, N = 603

**TTHHLVYPESFR pc3  
Q11201**

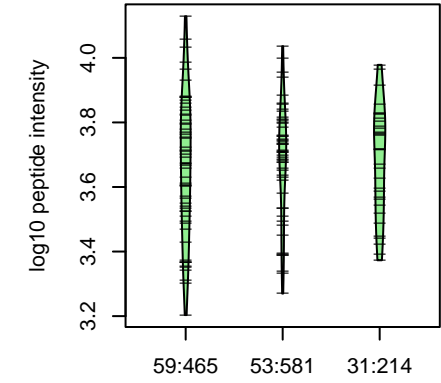

8:134503148:C:T\_C  
p = 0.81, beta = 0.0256, N = 143

**ST3GAL1 : NP4  
Q11201**

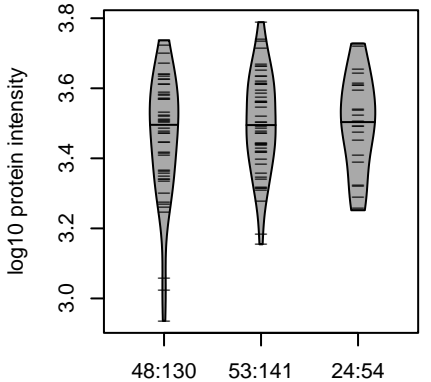

8:134503148:C:T\_C  
p = 0.76, beta = 0.0364, N = 125

**CAVVGNSGNLR pc2  
Q11201;Q16842**

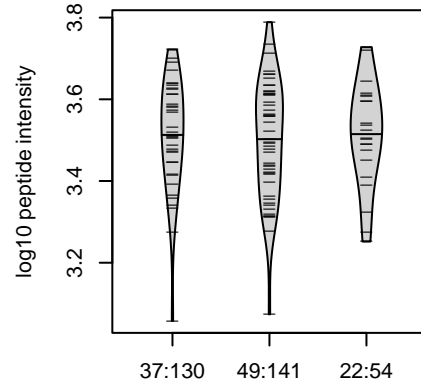

8:134503148:C:T\_C  
p = 0.37, beta = -0.116, N = 108

**APTAGFEADVGTK pc2  
Q11201**

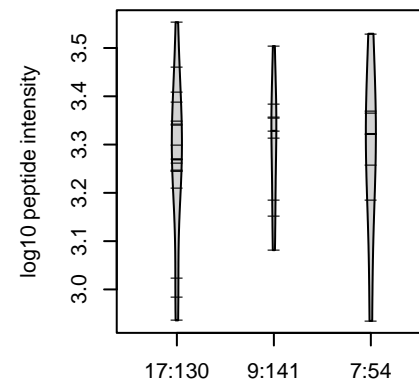

8:134503148:C:T\_C  
p = 0.87, beta = -0.0325, N = 33

Assay Target: ST3GAL1  
Olink UniProt: Q11201  
deCODE rsID: rs9643300  
Proxy rsID: rs9643300  
deCODE: 8:133490905:C:T  
Proxy SNP: 8:134503148:C:T  
deCODE log10(p): 207.5  
deCODE BETA: 0.25  
-:-:-:-  
822:675:603:143



**GLIPR2 : NP1  
Q9H4G4**

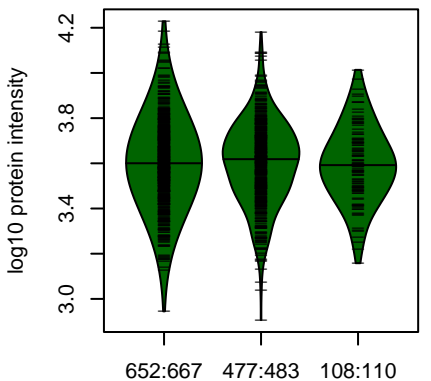

9:36153437:G:C\_C  
p = 0.84, beta = -0.0087, N = 1237

**EAQQYSEALASTR pc2  
Q5VZR0;Q9H4G4**

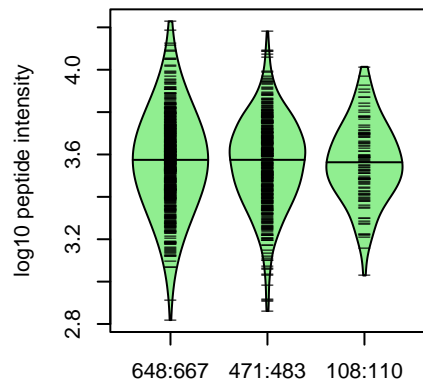

9:36153437:G:C\_C  
p = 0.57, beta = -0.0249, N = 1227

**ASASDGSSFVVAR pc2  
A0A087WUM5;Q5VZR0;Q9H4G4**

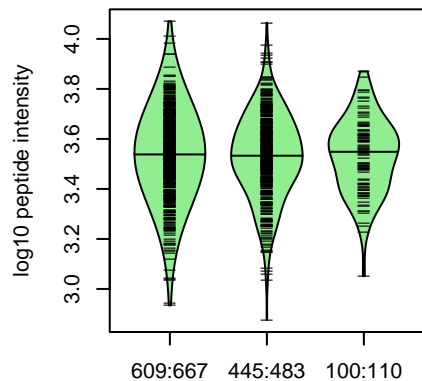

9:36153437:G:C\_C  
p = 0.88, beta = 0.00692, N = 1154

**QFHNEVLK pc2  
A0A088AWP7;Q5VZR0;Q9H4G4**

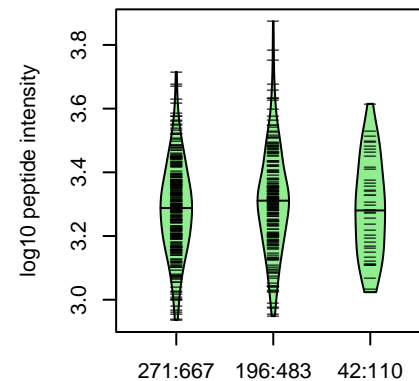

9:36153437:G:C\_C  
p = 0.38, beta = 0.0606, N = 509

**GLIPR2 : NP1  
Q9H4G4**

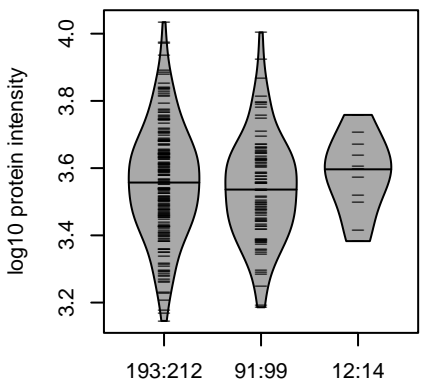

9:36153437:G:C\_C  
p = 0.85, beta = -0.0186, N = 296

**ASASDGSSFVVAR pc2  
A0A087WUM5;Q5VZR0;Q9H4G4**

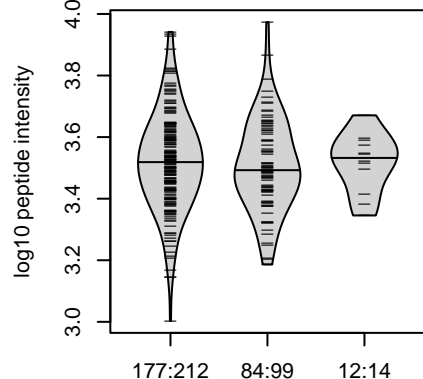

9:36153437:G:C\_C  
p = 0.62, beta = -0.0517, N = 273

**EAQQYSEALASTR pc2  
Q5VZR0;Q9H4G4**

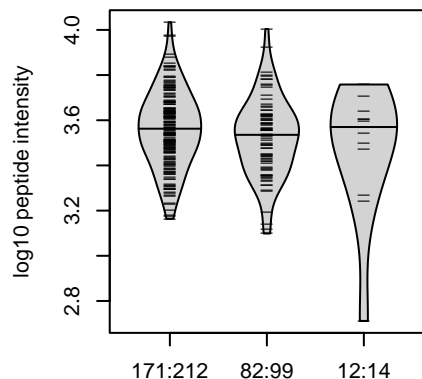

9:36153437:G:C\_C  
p = 0.17, beta = -0.145, N = 265

Assay Target: GLIPR2  
Olink UniProt: Q9H4G4  
deCODE rsID: rs4878643  
Proxy rsID: rs4878643  
deCODE: 9:36153440:C:G  
Proxy SNP: 9:36153437:G:C  
deCODE log10(p): 204.4  
deCODE BETA: -0.28  
-:-:-:NA:NA  
1227:1154:509:6:7

**MFAP2 : NP2**  
**P55001;P55001-2**



1:17315425:G:A\_G  
 $p = 1.2e-06$ ,  $\beta = -0.201$ ,  $N = 1132$

**TVCAHEELLR pc3**  
**P55001-2;P55001**



1:17315425:G:A\_G  
 $p = 2.8e-06$ ,  $\beta = -0.202$ ,  $N = 1043$

**CGVMASGLCQSVAAASCAR pc3**  
**P55001-2;P55001**

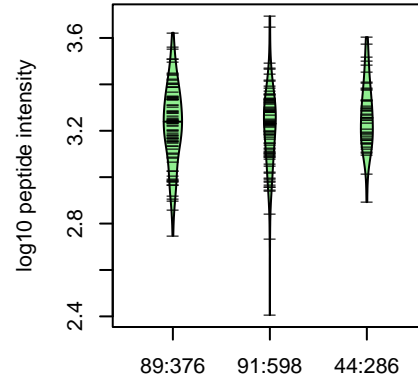

1:17315425:G:A\_G  
 $p = 0.75$ ,  $\beta = 0.0287$ ,  $N = 224$

**MFAP2 : NP2**  
**P55001;P55001-2**



1:17315425:G:A\_A  
 $p = 1e-04$ ,  $\beta = 0.307$ ,  $N = 303$

**TVCAHEELLR pc3**  
**P55001-2;P55001**



1:17315425:G:A\_A  
 $p = 0.0016$ ,  $\beta = 0.26$ ,  $N = 276$

Assay Target: MFAP2  
Olink UniProt: P55001  
deCODE rsID: rs4920605  
Proxy rsID: rs4920605  
deCODE: 1:16988925!:TGCCC  
Proxy SNP: 1:17315425:G:A  
deCODE log10(p): 199.1  
deCODE BETA: -0.25  
\*.\*.\_-  
1043:779:224

**HEXB : NP5  
P07686**

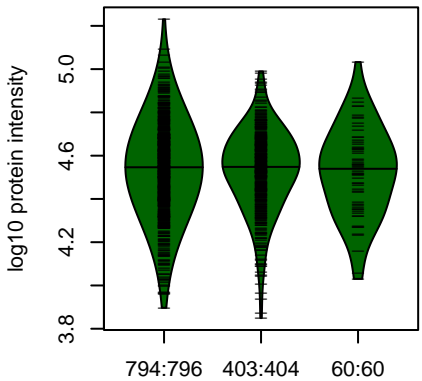

5:74030338:G:A\_A  
p = 0.15, beta = -0.0693, N = 1257

**LAPGTIVEVWK pc2  
P07686;Q5URX0**

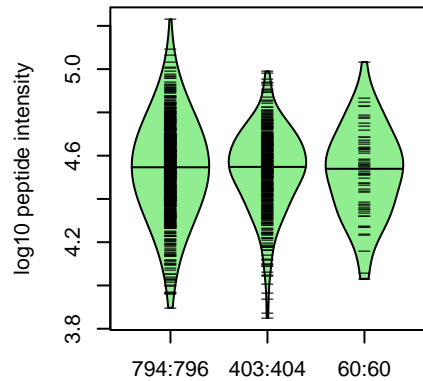

5:74030338:G:A\_A  
p = 0.15, beta = -0.069, N = 1257

**GSYLSHVTYTPNDVR pc3  
P07686;Q5URX0**

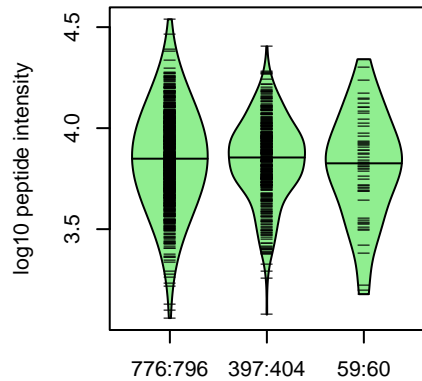

5:74030338:G:A\_A  
p = 0.075, beta = -0.0868, N = 1232

**GSIVWQEVFDDK pc2  
P07686;Q5URX0**

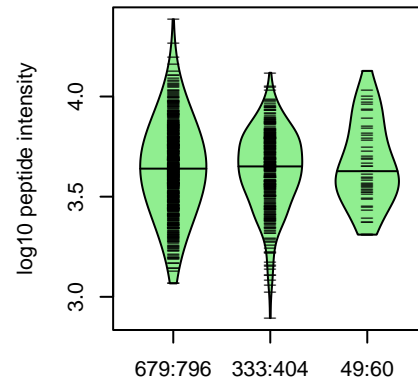

5:74030338:G:A\_A  
p = 0.47, beta = -0.0383, N = 1061

**DMDDAYDR pc2  
P07686;Q5URX0**

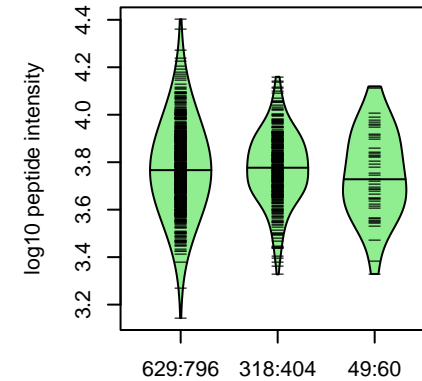

5:74030338:G:A\_A  
p = 0.17, beta = -0.0734, N = 996

**HEXB : NP5  
P07686**

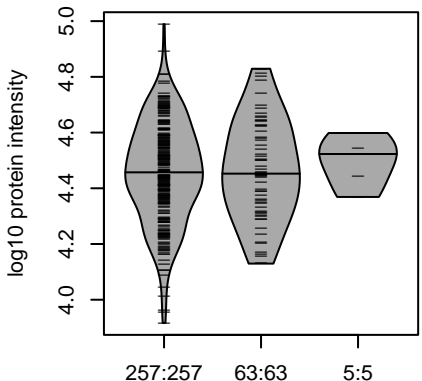

5:74030338:G:A\_A  
p = 0.47, beta = 0.088, N = 325

**GSYLSHVTYTPNDVR pc3  
P07686;Q5URX0**

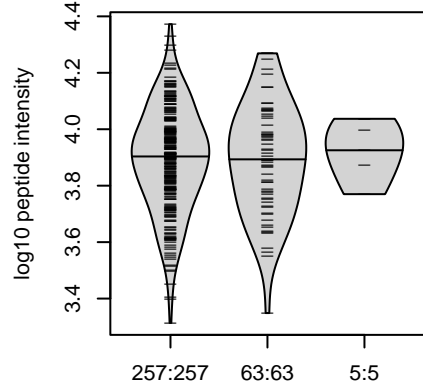

5:74030338:G:A\_A  
p = 0.59, beta = 0.0658, N = 325

**LAPGTIVEVWK pc2  
P07686;Q5URX0**

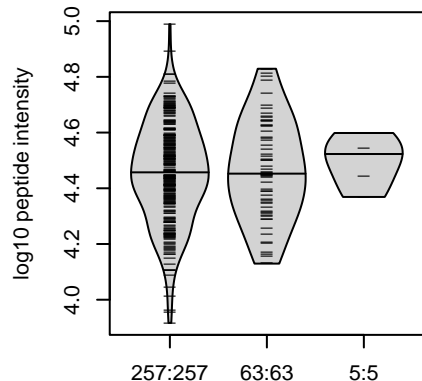

5:74030338:G:A\_A  
p = 0.45, beta = 0.0915, N = 325

**VLPEFDTPGHTLSWVGK pc3  
P07686;Q5URX0**

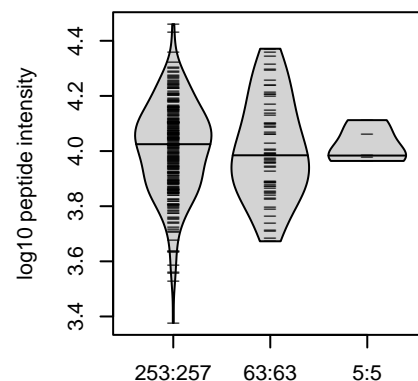

5:74030338:G:A\_A  
p = 0.86, beta = 0.0217, N = 321

**GSIVWQEVFDDK pc2  
P07686;Q5URX0**

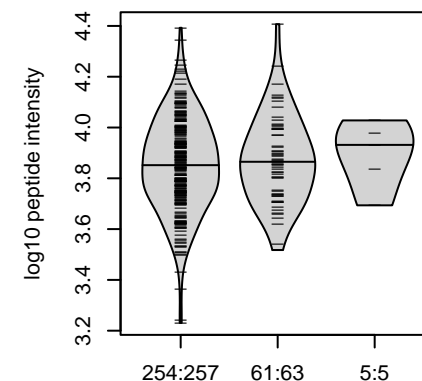

5:74030338:G:A\_A  
p = 0.23, beta = 0.146, N = 320

**WHHEPAEFQAK pc3  
rs11556045 REF**

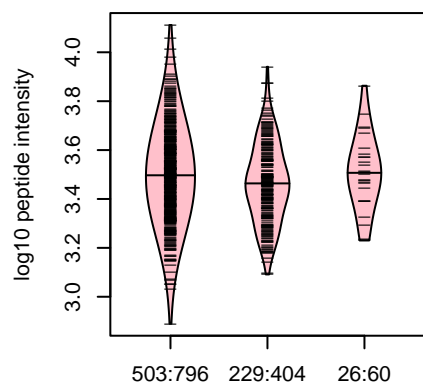

5:74030338:G:A\_A  
p = 0.0042, model = REC, N = 758

**WHHEPAEFQAK pc2  
rs11556045 REF**

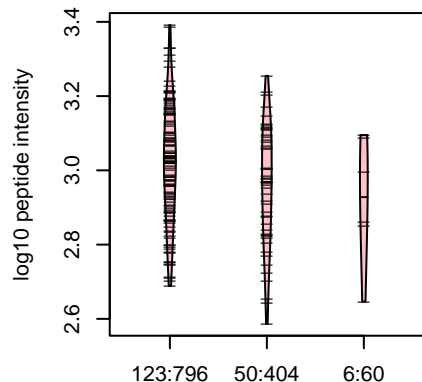

5:74030338:G:A\_A  
p = 0.11, model = REC, N = 179

**GILIDTSR pc2  
rs10805890 REF**

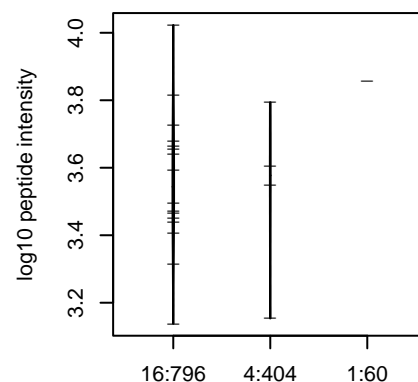

5:74030338:G:A\_A  
p = 0.26, model = REC, N = 21

Assay Target: HEXB  
Olink UniProt: P07686  
deCODE rsID: rs13164140  
Proxy rsID: rs13164140  
deCODE: 5:74734513:A:G  
Proxy SNP: 5:74030338:G:A  
deCODE log10(p): 196.1  
deCODE BETA: 0.27  
-----  
1257:1232:1061:996:993:752:74





**MGP : NP4  
P08493-2**

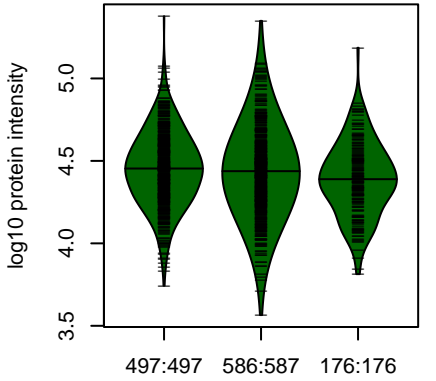

12:15054016:G:A\_A  
p = 0.0054, beta = -0.114, N = 1259

**NANTFISPQQR pc2  
P08493-2;P08493**

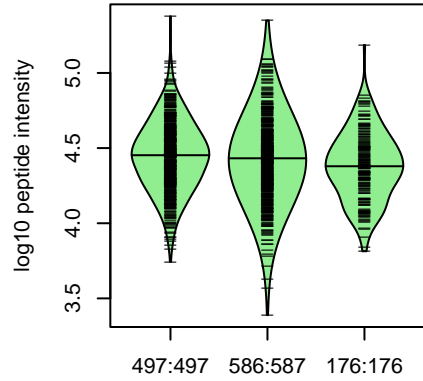

12:15054016:G:A\_A  
p = 0.0038, beta = -0.118, N = 1259

**YAMVYGYNAAYNR pc2  
P08493-2;P08493**

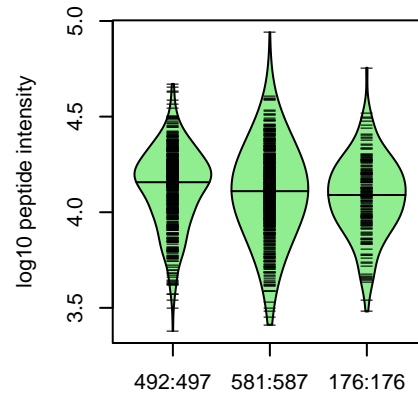

12:15054016:G:A\_A  
p = 0.0067, beta = -0.111, N = 1249

**EACDDYR pc2  
P08493-2;P08493**

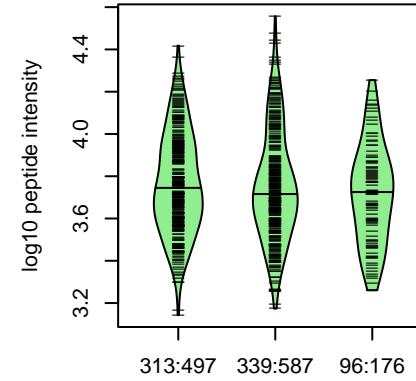

12:15054016:G:A\_A  
p = 0.11, beta = -0.0864, N = 748

**AQESHESMESYELNPFINRR pc4  
P08493-2**

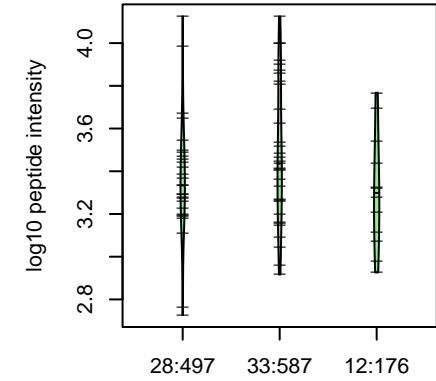

12:15054016:G:A\_A  
p = 0.97, beta = -0.00628, N = 73

**MGP : NP4  
P08493-2**

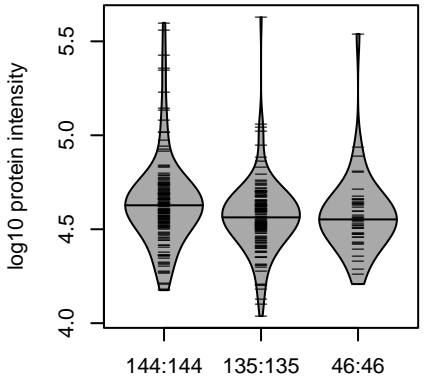

12:15054016:G:A\_A  
p = 0.053, beta = -0.15, N = 325

**YAMVYGYNAAYNR pc2  
P08493-2;P08493**

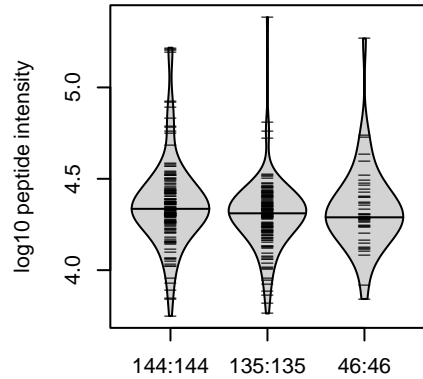

12:15054016:G:A\_A  
p = 0.21, beta = -0.0983, N = 325

**NANTFISPQQR pc2  
P08493-2;P08493**

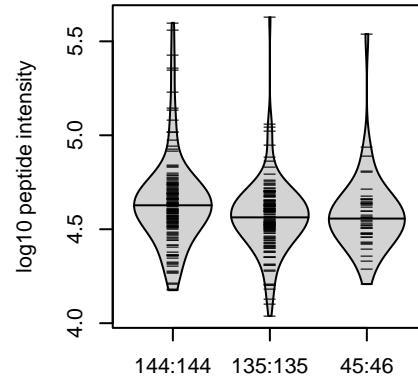

12:15054016:G:A\_A  
p = 0.068, beta = -0.143, N = 324

**AQESHESMESYELNPFINRR pc4  
P08493-2**

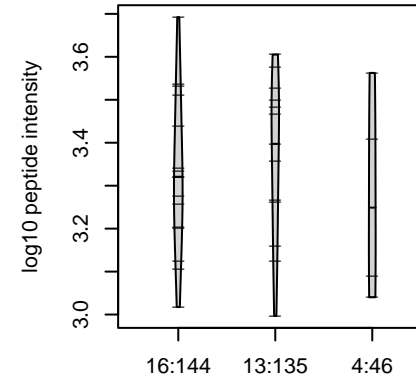

12:15054016:G:A\_A  
p = 0.33, beta = -0.233, N = 33

**EACDDYR pc2  
P08493-2;P08493**

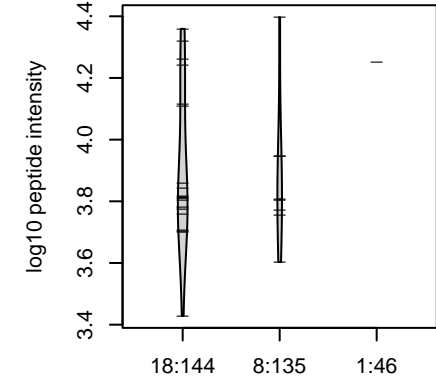

12:15054016:G:A\_A  
p = 0.4, beta = 0.274, N = 27

Assay Target: MGP  
Olink UniProt: P08493  
deCODE rsID: rs7294636  
Proxy rsID: rs7294636  
deCODE: 12:14901082:A:G  
Proxy SNP: 12:15054016:G:A  
deCODE log10(p): 192.8  
deCODE BETA: -0.25  
\*.\*.-:.-:NA:NA  
1259:1249:748:73:3:2

**HSPG2 : NP2**  
**P98160**

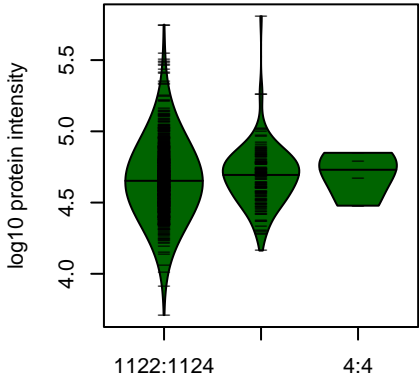

1:22181895:C:T\_T  
p = 0.079, beta = 0.153, N = 1256

**AGLSSGFIGCVR pc2**  
**P98160**

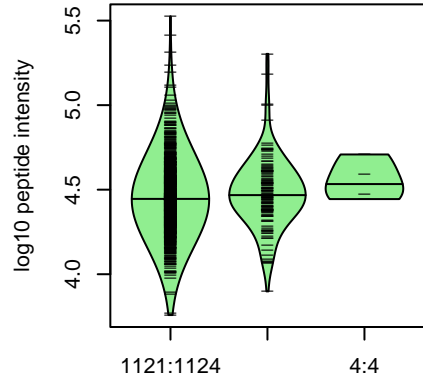

1:22181895:C:T\_T  
p = 0.046, beta = 0.174, N = 1255

**YELGSLAVLR pc2**  
**P98160**

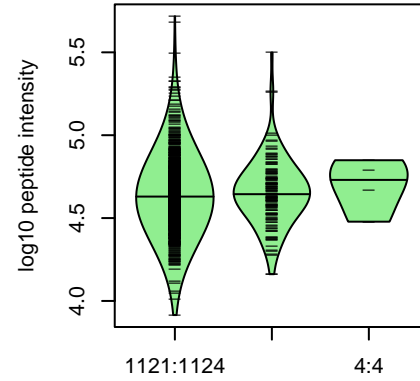

1:22181895:C:T\_T  
p = 0.14, beta = 0.129, N = 1255

**AMDFNGILTIR pc2**  
**P98160**

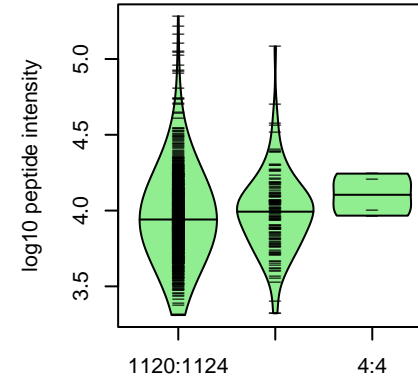

1:22181895:C:T\_T  
p = 0.11, beta = 0.14, N = 1254

**FDAGSGMATIR pc2**  
**P98160**

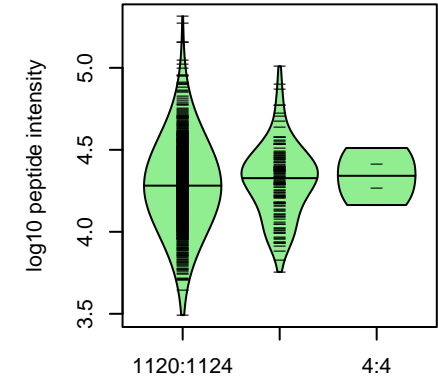

1:22181895:C:T\_T  
p = 0.13, beta = 0.131, N = 1254

**HSPG2 : NP2**  
**P98160**

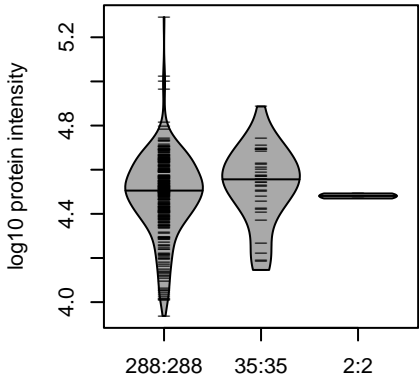

1:22181895:C:T\_T  
p = 0.087, beta = 0.273, N = 325

**AGLSSGFIGCVR pc2**  
**P98160**

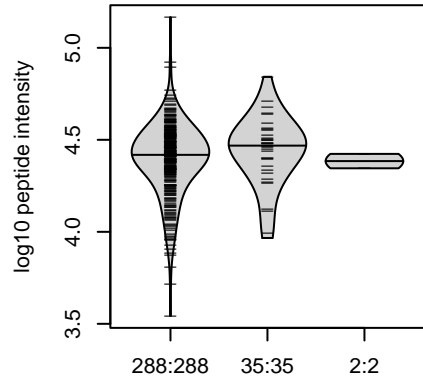

1:22181895:C:T\_T  
p = 0.11, beta = 0.252, N = 325

**SAEPLALGR pc2**  
**P98160**

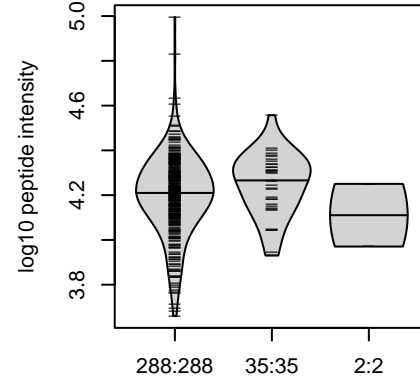

1:22181895:C:T\_T  
p = 0.074, beta = 0.285, N = 325

**SGPVEDFVSLAMVGGHLEFR pc3**  
**P98160**

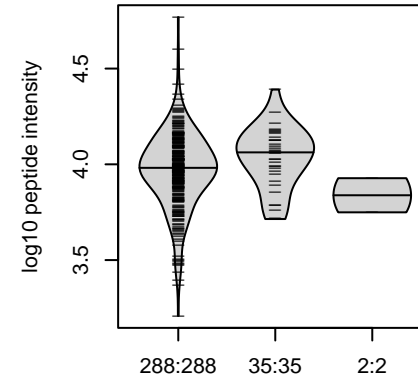

1:22181895:C:T\_T  
p = 0.11, beta = 0.254, N = 325

**YELGSLAVLR pc2**  
**P98160**

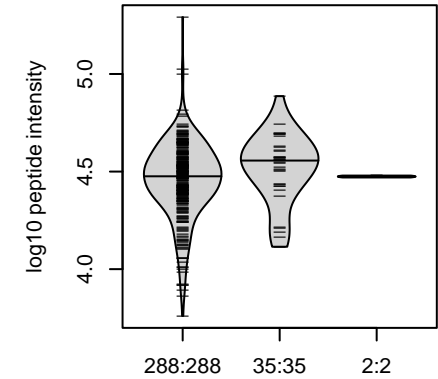

1:22181895:C:T\_T  
p = 0.021, beta = 0.368, N = 325

Assay Target: HSPG2  
Olink UniProt: P98160  
deCODE rsID: rs2229475  
Proxy rsID: rs2229475  
deCODE: 1:21855402:T:C  
Proxy SNP: 1:22181895:C:T  
deCODE log10(p): 190.6  
deCODE BETA: 0.51  
-----  
1255:1255:1254:1254:125

**SPLPWQHR pc2**  
**rs2291827 REF**

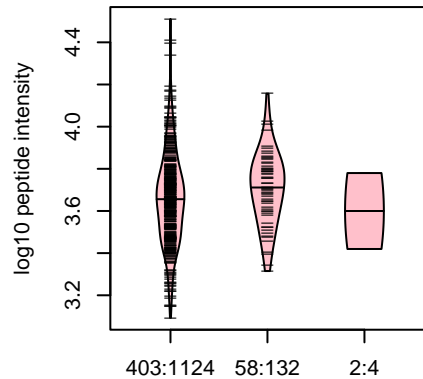

1:22181895:C:T\_T  
p = 0.06, model = REC, N = 463

**GNVYIGGAPDVATLTGGR pc2**  
**rs3736360 ALT**

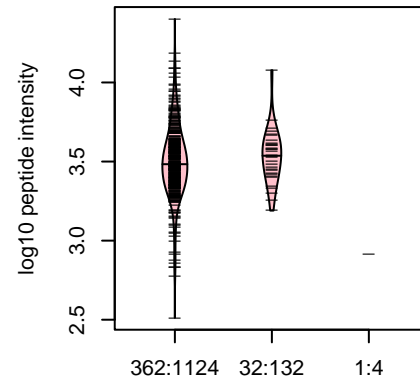

1:22181895:C:T\_T  
p = 0.063, model = REC, N = 395

**GSVYIGGAPDVATLTGGR pc2**  
**rs3736360 REF**

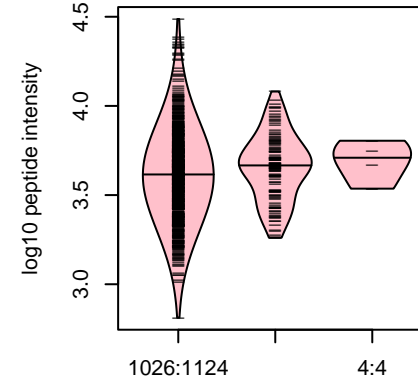

1:22181895:C:T\_T  
p = 0.33, model = REC, N = 1154



**CHGA : NP2  
P10645**

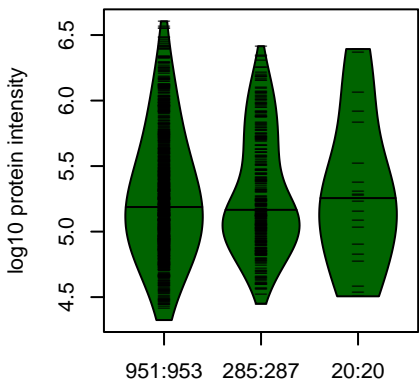

14:93399101:C:T\_T  
p = 0.37, beta = 0.0533, N = 1256

**GLSAEPGWQAK pc2  
P10645**

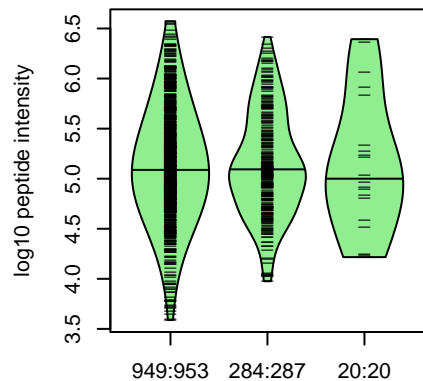

14:93399101:C:T\_T  
p = 0.61, beta = 0.0299, N = 1253

**CIVEVISDTLSK pc2  
G5E968;P10645**

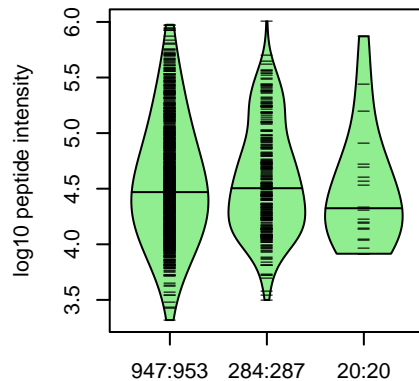

14:93399101:C:T\_T  
p = 0.45, beta = 0.0453, N = 1251

**YGPQAEGDSEGLSQGLVDR pc3  
P10645**

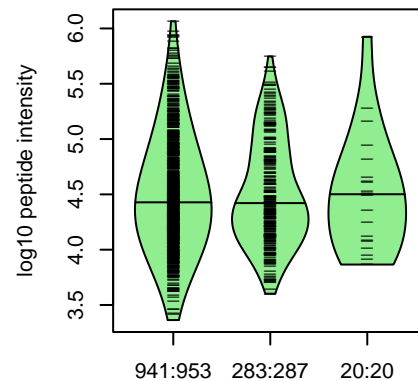

14:93399101:C:T\_T  
p = 0.42, beta = 0.0478, N = 1244

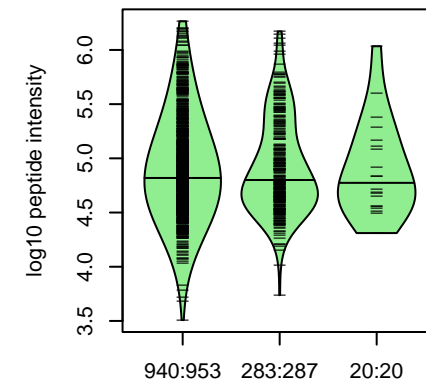

14:93399101:C:T\_T  
p = 0.41, beta = 0.0489, N = 1243

**CHGA : NP2  
P10645**

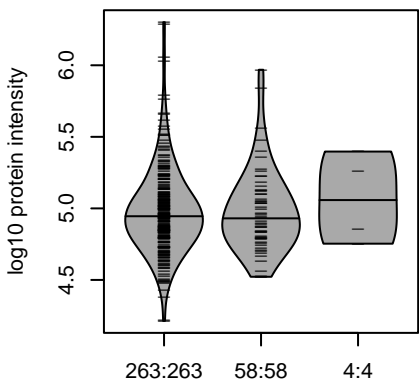

14:93399101:C:T\_T  
p = 0.66, beta = -0.0555, N = 325

**CIVEVISDTLSK pc2  
G5E968;P10645**

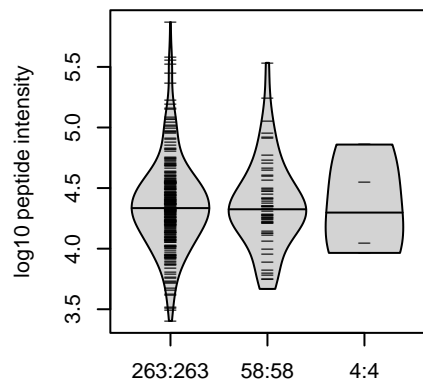

14:93399101:C:T\_T  
p = 0.32, beta = -0.125, N = 325

**EEEEEMAVVPQGLFR pc3  
G5E968;P10645**

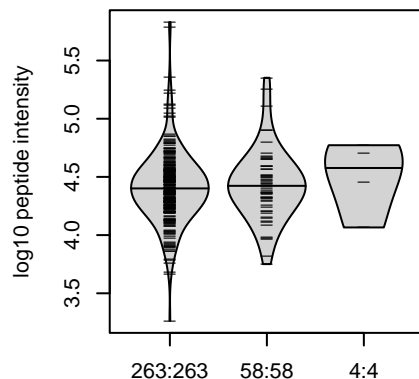

14:93399101:C:T\_T  
p = 0.79, beta = 0.0338, N = 325

**ELQDLALQGAK pc2  
G5E968;P10645**

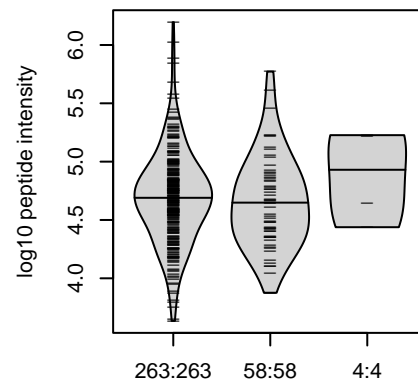

14:93399101:C:T\_T  
p = 0.72, beta = -0.0448, N = 325

**GEQEHSQQKEEEEEEMAVVPQGLFR pc3  
G5E968;P10645**

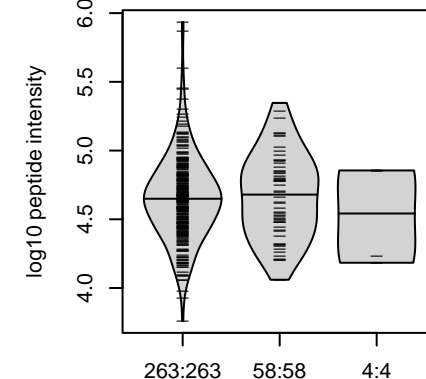

14:93399101:C:T\_T  
p = 0.55, beta = -0.0759, N = 325

**PSSWEDSLEAGLPLQVR pc3  
rs729940 ALT**

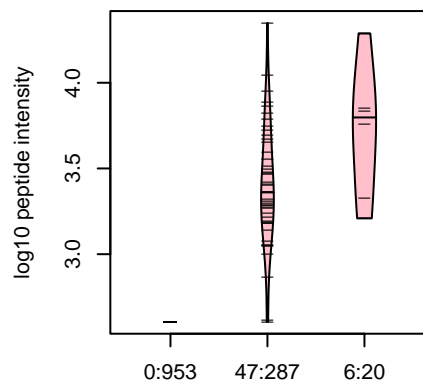

14:93399101:C:T\_T  
p = 8.1e-35, model = REC, N = 53

**EDSLEAGLPLQVR pc2  
rs729940 REF**

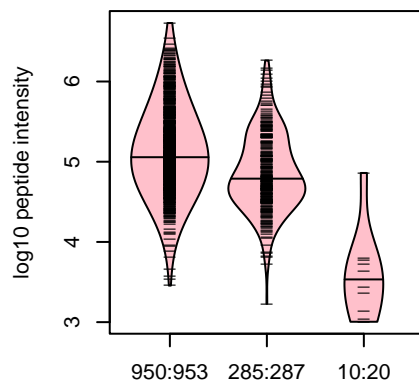

14:93399101:C:T\_T  
p = 2e-16, model = DOM, N = 1245

**EDSLEAGLPLQVR pc3  
rs729940 REF**

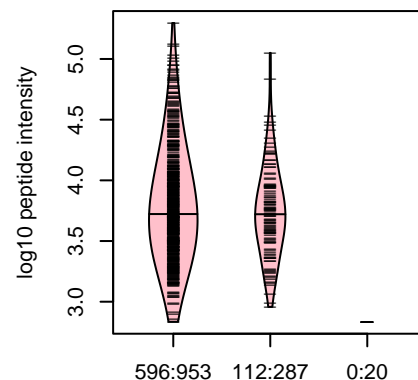

14:93399101:C:T\_T  
p = 1.8e-15, model = REC, N = 708

**PSSREDSLEAGLPLQVR pc3  
rs729940 REF**

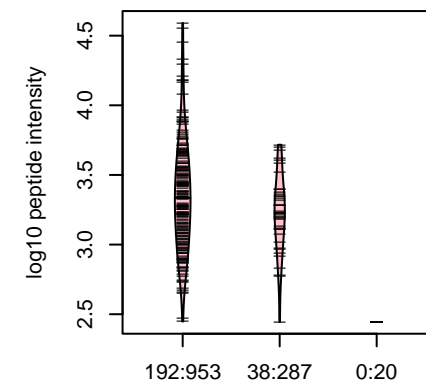

14:93399101:C:T\_T  
p = 0.0022, model = REC, N = 230

Assay Target: CHGA  
Olink UniProt: P10645  
deCODE rsID: rs729940  
Proxy rsID: rs729940  
deCODE: 14:92932756:T:C  
Proxy SNP: 14:93399101:C:T  
deCODE log10(p): 183.8  
deCODE BETA: -0.34  
-----  
1253:1251:1244:1243:124



**ALAD : NP1  
P13716**

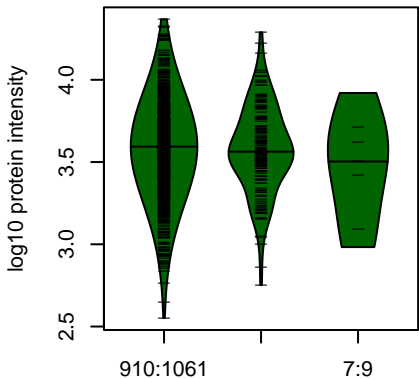

9:116153891:C:G\_G  
p = 0.81, beta = -0.019, N = 1076

**AGCQVVAPSDMMDGRVEAIK pc3  
P13716**

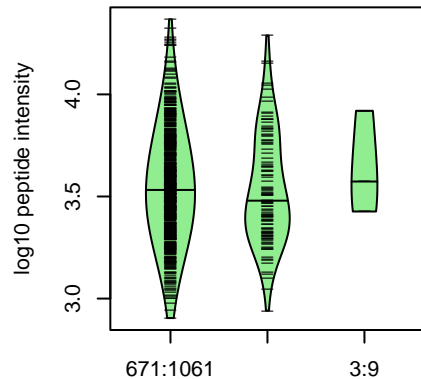

9:116153891:C:G\_G  
p = 0.83, beta = -0.0212, N = 783

**FASCFYGPFR pc2  
P13716**

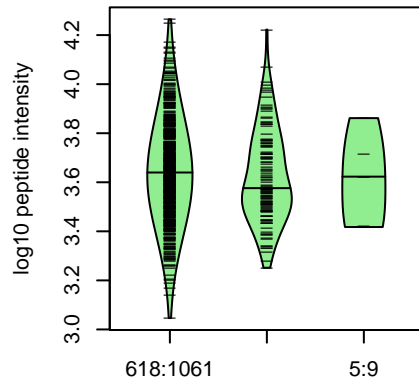

9:116153891:C:G\_G  
p = 0.54, beta = -0.056, N = 745

**AGCQVVAPSDMMDGR pc2  
P13716**

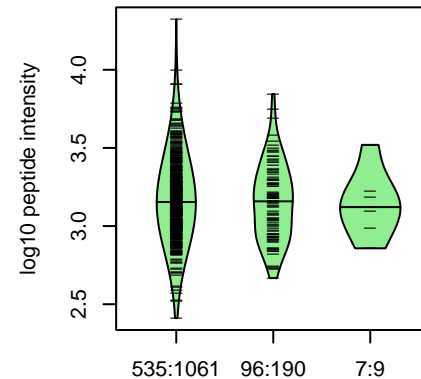

9:116153891:C:G\_G  
p = 0.59, beta = -0.0527, N = 638

**GSAADSEESPAIEAIHLLR pc3  
P13716**

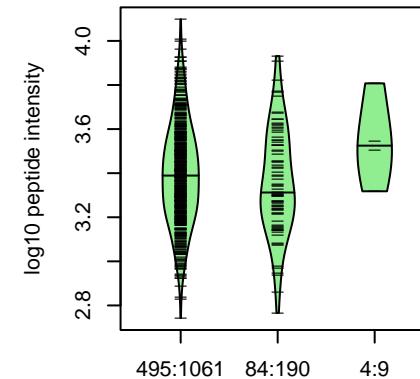

9:116153891:C:G\_G  
p = 0.53, beta = -0.0679, N = 583

**ALAD : NP1  
P13716**

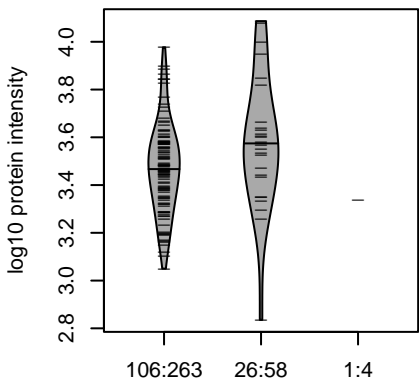

9:116153891:C:G\_G  
p = 0.057, beta = 0.376, N = 133

**AGCQVVAPSDMMDGRVEAIK pc3  
P13716**

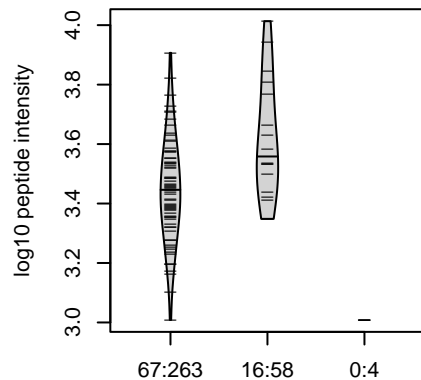

9:116153891:C:G\_G  
p = 0.0017, beta = 0.82, N = 83

**FASCFYGPFR pc2  
P13716**

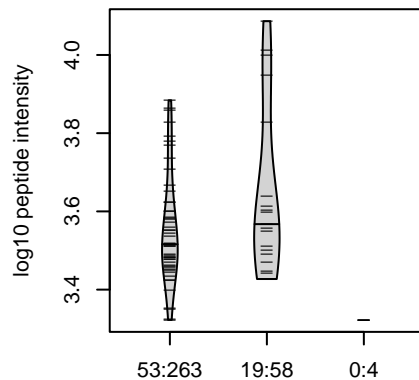

9:116153891:C:G\_G  
p = 0.064, beta = 0.472, N = 72

**VSMYSYSAK pc2  
P13716**

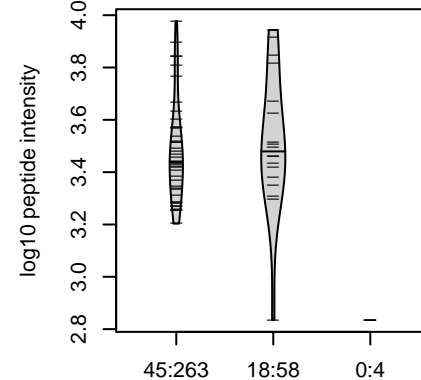

9:116153891:C:G\_G  
p = 0.97, beta = -0.0106, N = 63

**LAEVALAYAK pc2  
P13716**

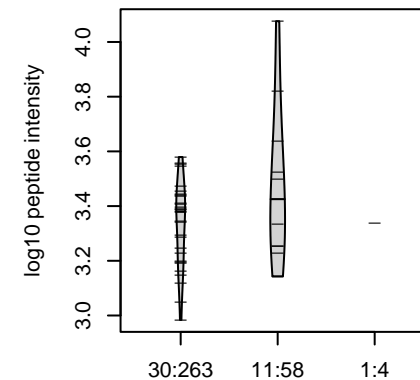

9:116153891:C:G\_G  
p = 0.38, beta = 0.253, N = 42

Assay Target: ALAD  
Olink UniProt: P13716  
deCODE rsID: rs1800435  
Proxy rsID: rs1800435  
deCODE: 9:113391611:G:C  
Proxy SNP: 9:116153891:C:G  
deCODE log10(p): 178.9  
deCODE BETA: -0.42  
-----  
783:745:638:583:535:512:430:4







**KNG1 : NP4  
P01042**



3:186454180:A:C\_C  
p = 0.31, beta = 0.0411, N = 1259

**DFVQPPTK pc2  
P01042;P01042-2;P01042-3**



3:186454180:A:C\_C  
p = 0.58, beta = 0.0225, N = 1259

**DIPTNSPELEETLHTITK pc3  
P01042;P01042-2;P01042-3**

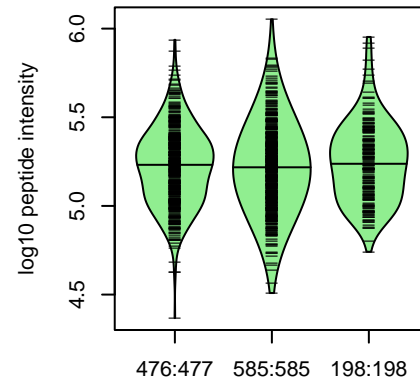

3:186454180:A:C\_C  
p = 0.5, beta = 0.0274, N = 1259

**ENFLFLTPDCK pc2  
P01042;P01042-2**

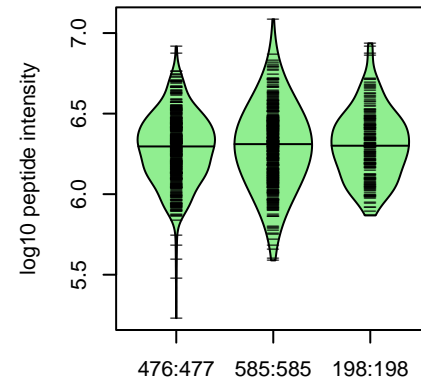

3:186454180:A:C\_C  
p = 0.26, beta = 0.0458, N = 1259

**ESNEELTESCETK pc2  
P01042;P01042-2;P01042-3**



3:186454180:A:C\_C  
p = 0.021, beta = 0.0931, N = 1259

**KNG1 : NP4  
P01042**



3:186454180:A:C\_C  
p = 0.59, beta = -0.0428, N = 325

**AATGECTATVVGK pc2  
P01042;P01042-2;P01042-3**



3:186454180:A:C\_C  
p = 0.12, beta = 0.122, N = 325

**AGAEPASEREVS pc2  
P01042-2;P01042-3**

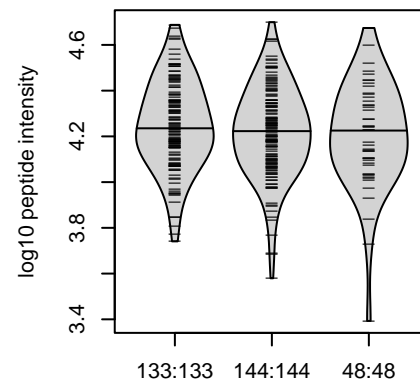

3:186454180:A:C\_C  
p = 0.11, beta = -0.125, N = 325

**DFVQPPTK pc2  
P01042;P01042-2;P01042-3**

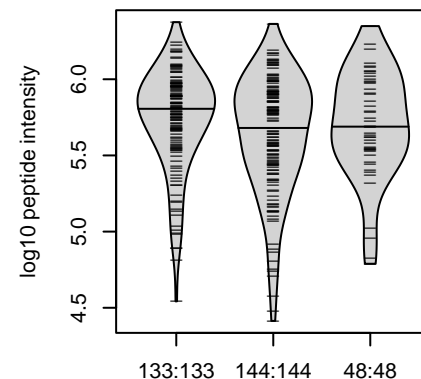

3:186454180:A:C\_C  
p = 0.3, beta = -0.0813, N = 325

**EETSHLR pc2  
P01042-2;P01042-3**



3:186454180:A:C\_C  
p = 0.96, beta = 0.00345, N = 325

**ITYSIVQTNSK pc2  
rs2304456 REF**



3:186454180:A:C\_C  
p = 0.2, model = REC, N = 436

**ITYSIVQTNSKENFLFLTPDCK pc4  
rs2304456 REF**

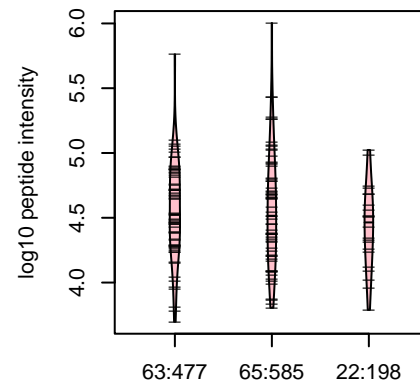

3:186454180:A:C\_C  
p = 0.28, model = REC, N = 150

**MTYSIVQTNSK pc2  
rs2304456 ALT**

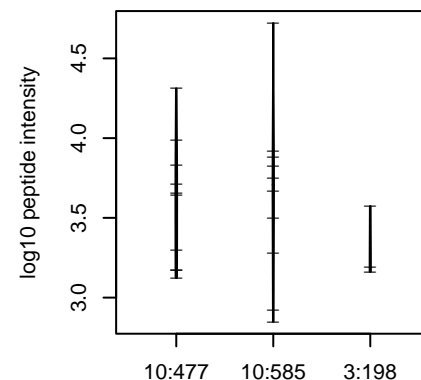

3:186454180:A:C\_C  
p = 0.67, model = REC, N = 23

**HGIQYFNNNTQHSSLFMLNEVK pc  
rs1656922 REF**



3:186454180:A:C\_C  
p = NA, model = NA, N = 6

Assay Target: KNG1  
Olink UniProt: P01042  
deCODE rsID: rs5030062  
Proxy rsID: rs5030062  
deCODE: 3:186736391:C:A  
Proxy SNP: 3:186454180:A:C  
deCODE log10(p): 177.1  
deCODE BETA: 0.24  
-----  
1259:1259:1259:1259:125

**COL6A2 : NP1  
P12110**

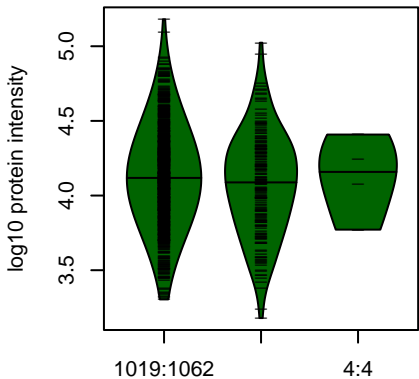

21:47552209:G:A\_A  
p = 0.09, beta = -0.131, N = 1203

**VFAVVITDGR pc2  
P12110-2;P12110-3;P12110**

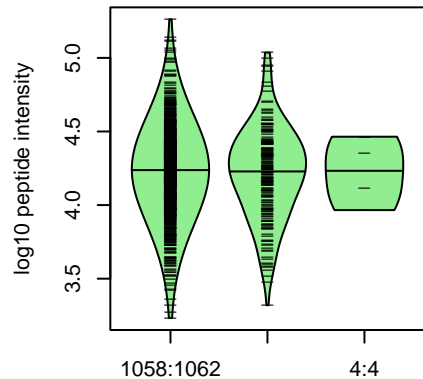

21:47552209:G:A\_A  
p = 0.56, beta = -0.044, N = 1255

**NLEWIAGGTWTPSALK pc2  
P12110-2;P12110-3;P12110**

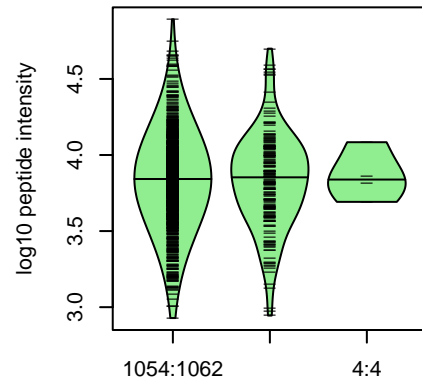

21:47552209:G:A\_A  
p = 0.91, beta = -0.00888, N = 1251

**GTVHFAVVITDGHVTGSPCGGIK pc  
P12110-2;P12110-3;P12110**

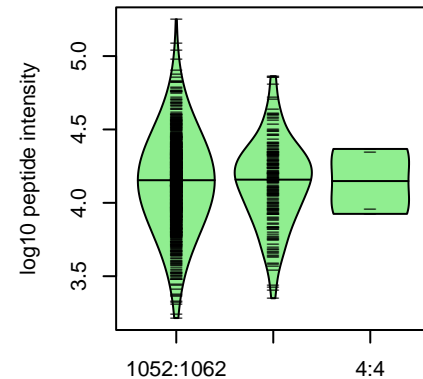

21:47552209:G:A\_A  
p = 0.91, beta = -0.00834, N = 1249

**LFAVAPNQLNK pc2  
P12110-2;P12110-3;P12110**

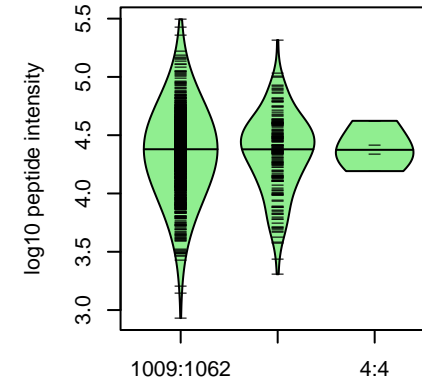

21:47552209:G:A\_A  
p = 0.98, beta = 0.00236, N = 1197

**COL6A2 : NP1  
P12110**

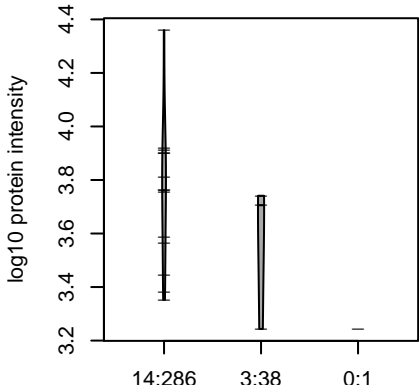

21:47552209:G:A\_A  
p = 0.13, beta = -0.86, N = 17

**VFAVVITDGR pc2  
P12110-2;P12110-3;P12110**

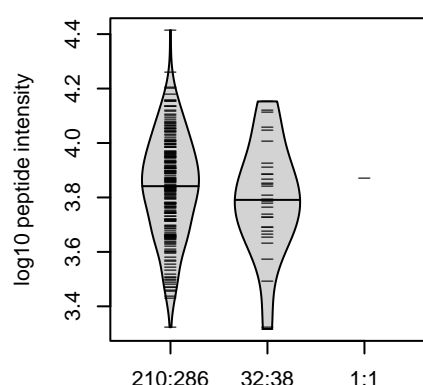

21:47552209:G:A\_A  
p = 0.14, beta = -0.26, N = 243

**GTVHFAVVITDGHVTGSPCGGIK pc  
P12110-2;P12110-3;P12110**

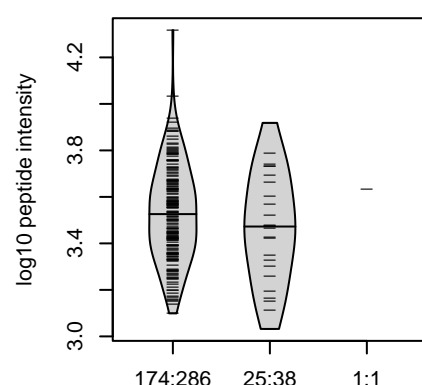

21:47552209:G:A\_A  
p = 0.14, beta = -0.288, N = 200

**LFAVAPNQLNK pc2  
P12110-2;P12110-3;P12110**

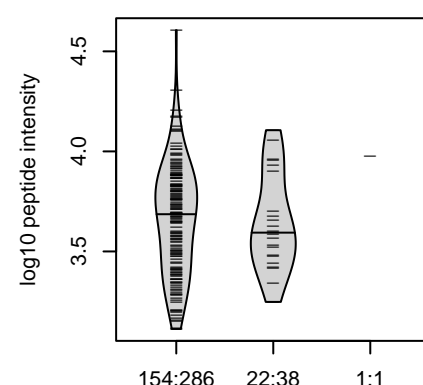

21:47552209:G:A\_A  
p = 0.89, beta = -0.0276, N = 177

**NLEWIAGGTWTPSALK pc2  
P12110-2;P12110-3;P12110**

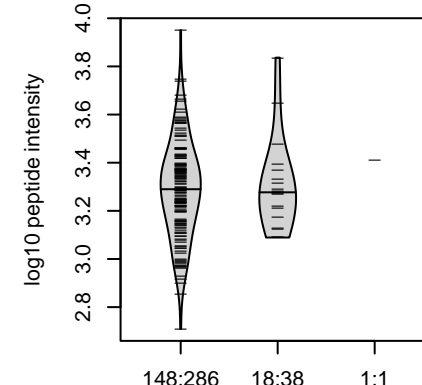

21:47552209:G:A\_A  
p = 0.77, beta = 0.0638, N = 167

**3VVQYSHEGTFEAIQLDDEHIDSLSSFVGVVQYSHEGTFEAIQLDDERIDSLSSF1  
rs1042917 ALT  
rs1042917 REF**

Assay Target: COL6A2  
Olink UniProt: P12110  
deCODE rsID: rs35548026  
Proxy rsID: rs35548026  
deCODE: 21:46132295:A:G  
Proxy SNP: 21:47552209:G:A  
deCODE log10(p): 171.6  
deCODE BETA: -0.39  
-----  
1255:1251:1249:1197:1196:118

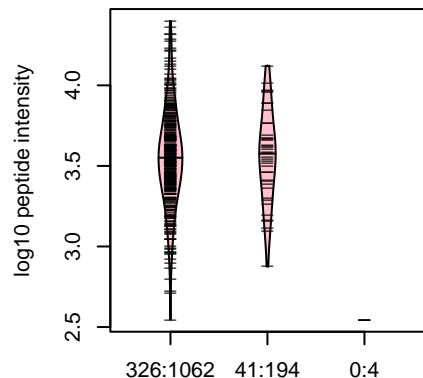

21:47552209:G:A\_A  
p = 0.0048, model = REC, N = 367

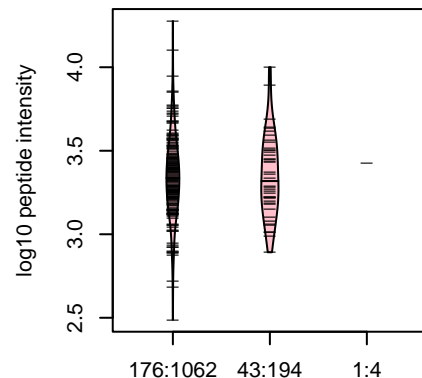

21:47552209:G:A\_A  
p = 0.066, model = REC, N = 220

**RALB : NP4**  
**P11234**

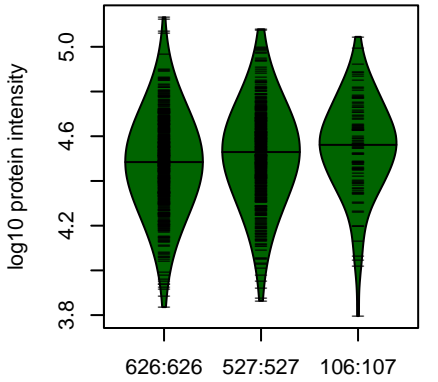

2:121026652:T:A\_T  
p = 5.6e-07, beta = 0.218, N = 1259

**IPLLVGNGK pc2**  
**P11234**

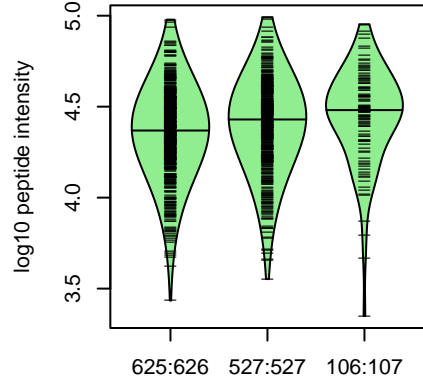

2:121026652:T:A\_T  
p = 1.4e-07, beta = 0.23, N = 1258

**VFFDLMR pc2**  
**P11233;P11234**

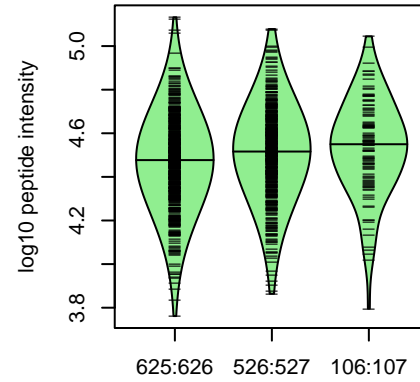

2:121026652:T:A\_T  
p = 5.3e-06, beta = 0.199, N = 1257

**AEWGVQYVETSAK pc2**  
**P11234**

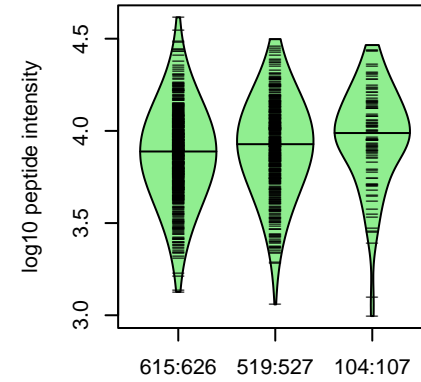

2:121026652:T:A\_T  
p = 3.9e-07, beta = 0.223, N = 1238

**QVPVEEAR pc2**  
**P11234**

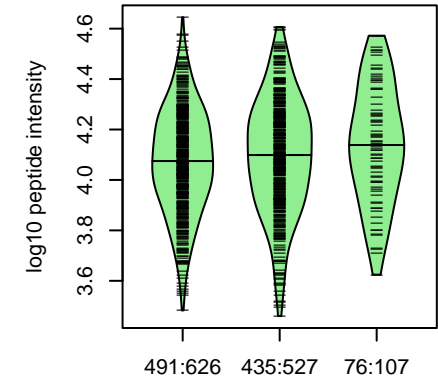

2:121026652:T:A\_T  
p = 0.0035, beta = 0.146, N = 1002

**RALB : NP4**  
**P11234**

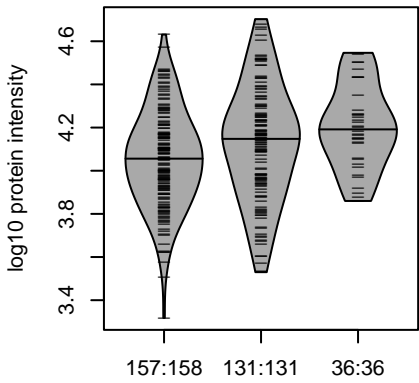

2:121026652:T:A\_T  
p = 0.0016, beta = 0.254, N = 324

**IPLLVGNGK pc2**  
**P11234**

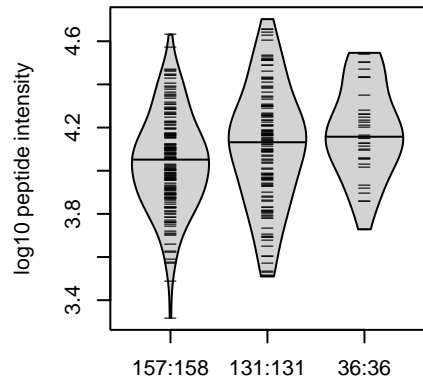

2:121026652:T:A\_T  
p = 0.0028, beta = 0.242, N = 324

**VFFDLMR pc2**  
**P11233;P11234**

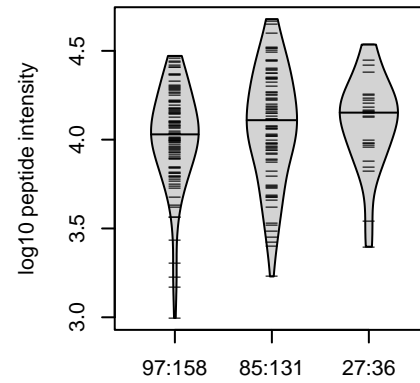

2:121026652:T:A\_T  
p = 0.28, beta = 0.105, N = 209

**VIMVSGGVGK pc2**  
**F8WEQ6;P11233;P11234**

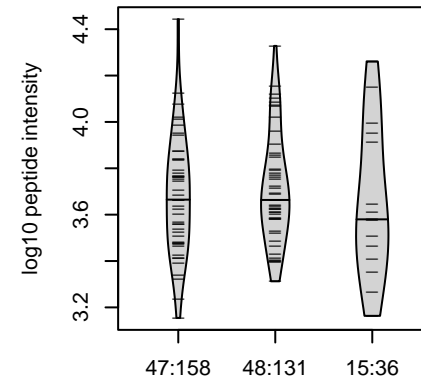

2:121026652:T:A\_T  
p = 0.75, beta = -0.0421, N = 110

**GQSSLALHK pc2**  
**F8WEQ6;P11234**

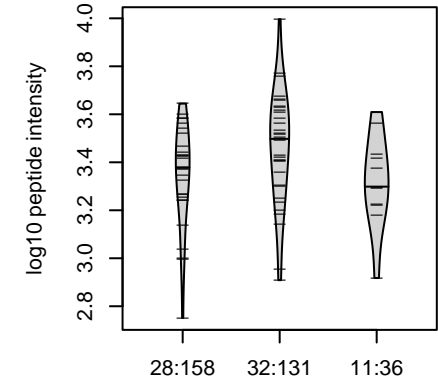

2:121026652:T:A\_T  
p = 0.83, beta = 0.036, N = 71

Assay Target: RALB  
Olink UniProt: P11234  
deCODE rsID: rs11448973  
Proxy rsID: rs7593660  
deCODE: 2:120268935!:CAAT  
Proxy SNP: 2:121026652:T:A  
deCODE log10(p): 168.9  
deCODE BETA: 0.24  
\*.\*.\*.\*.\*-:-:-:-:-  
1258:1257:1238:1002:831:464:

**KNG1 : NP4  
P01042**

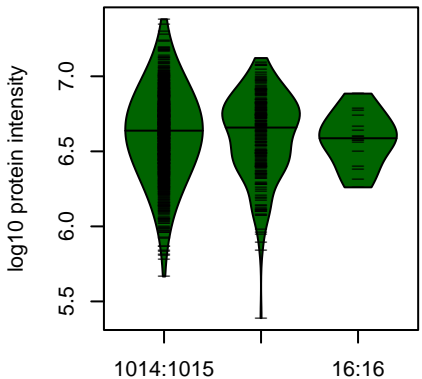

3:186445052:T:G\_G  
p = 0.46, beta = -0.0472, N = 1259

**DFVQPPTK pc2  
P01042;P01042-2;P01042-3**

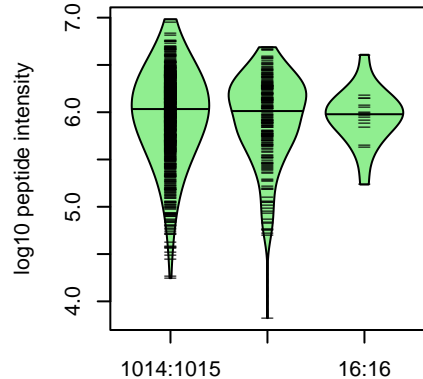

3:186445052:T:G\_G  
p = 0.22, beta = -0.0795, N = 1259

**DIPTNSPELEETLHTITK pc3  
P01042;P01042-2;P01042-3**

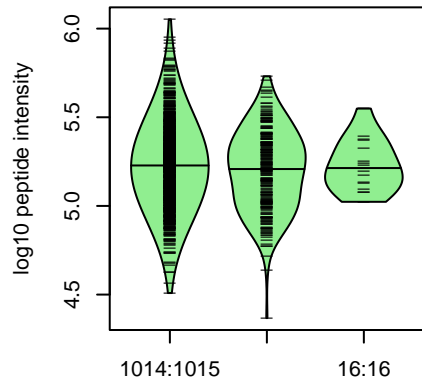

3:186445052:T:G\_G  
p = 0.12, beta = -0.101, N = 1259

**ENFLFLTPDCK pc2  
P01042;P01042-2**

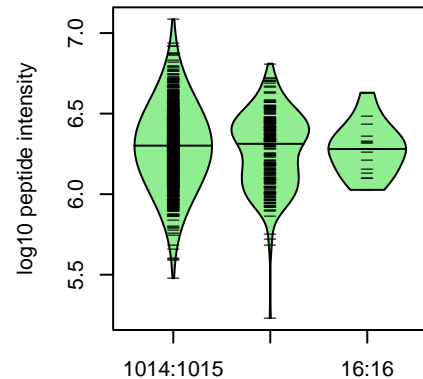

3:186445052:T:G\_G  
p = 0.17, beta = -0.0874, N = 1259

**ESNEELTESCETK pc2  
P01042;P01042-2;P01042-3**

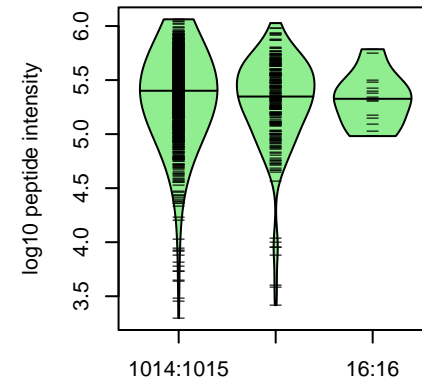

3:186445052:T:G\_G  
p = 0.028, beta = -0.141, N = 1259

**KNG1 : NP4  
P01042**

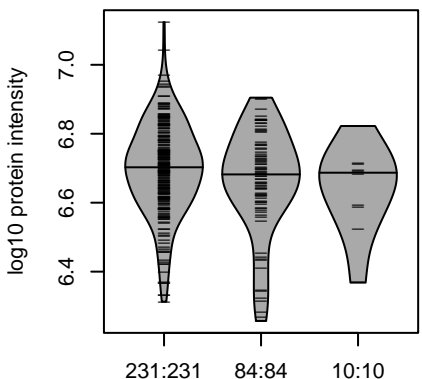

3:186445052:T:G\_G  
p = 0.071, beta = -0.187, N = 325

**AATGECTATVVGK pc2  
P01042;P01042-2;P01042-3**

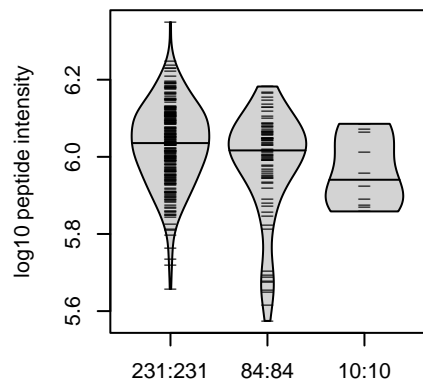

3:186445052:T:G\_G  
p = 0.0014, beta = -0.328, N = 325

**AGAEPASEREVS pc2  
P01042-2;P01042-3**

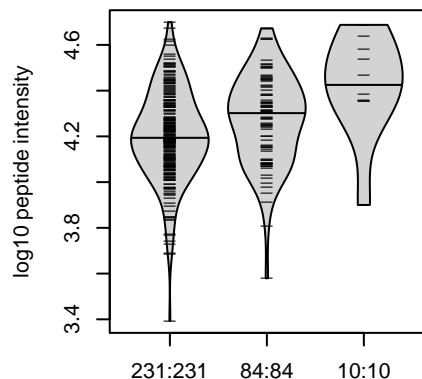

3:186445052:T:G\_G  
p = 1.2e-05, beta = 0.448, N = 325

**DFVQPPTK pc2  
P01042;P01042-2;P01042-3**

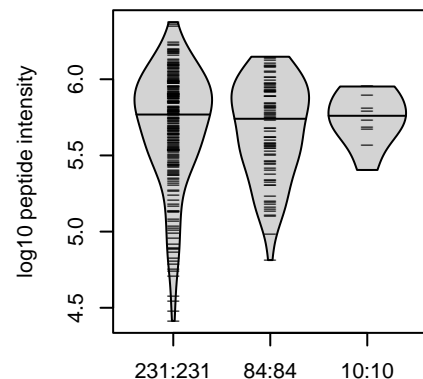

3:186445052:T:G\_G  
p = 0.75, beta = -0.0334, N = 325

**EETSHLR pc2  
P01042-2;P01042-3**

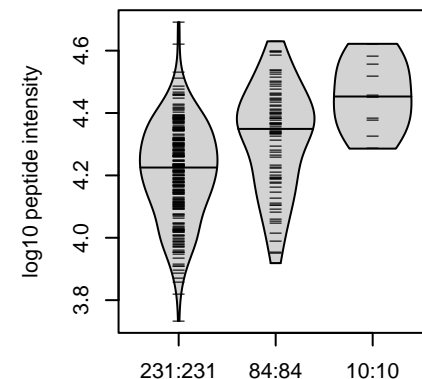

3:186445052:T:G\_G  
p = 5.7e-12, beta = 0.689, N = 325

**ITYSIVQTNSCK pc2  
rs2304456 REF**

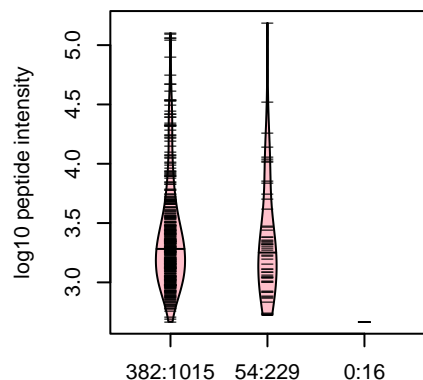

3:186445052:T:G\_G  
p = 3.1e-06, model = REC, N = 436

**MTYSIVQTNSCK pc2  
rs2304456 ALT**

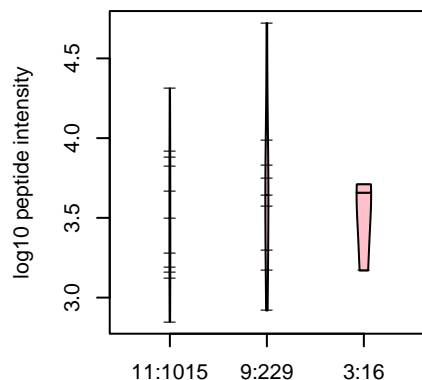

3:186445052:T:G\_G  
p = 4e-04, model = REC, N = 23

**ITYSIVQTNSCKENFLFLTPDCK pc4  
rs2304456 REF**

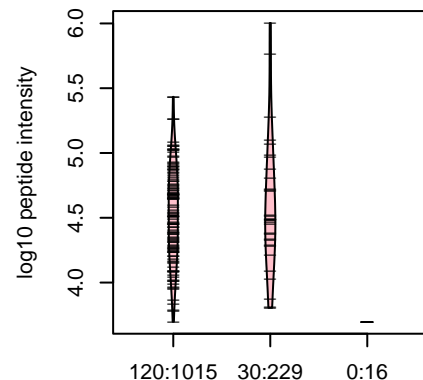

3:186445052:T:G\_G  
p = 0.24, model = DOM, N = 150

**HGIQYFNNNTQHSSLFMLNEVK pc6  
rs1656922 REF**

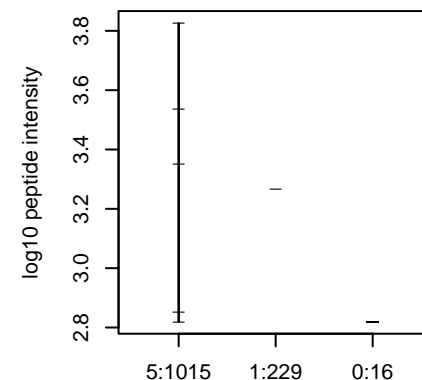

3:186445052:T:G\_G  
p = NA, model = NA, N = 6

Assay Target: KNG1  
Olink UniProt: P01042  
deCODE rsID: rs2304456  
Proxy rsID: rs2304456  
deCODE: 3:186727263:G:T  
Proxy SNP: 3:186445052:T:G  
deCODE log10(p): 167.7  
deCODE BETA: 0.34  
-----\*-----\*  
1259:1259:1259:1259:1259:125

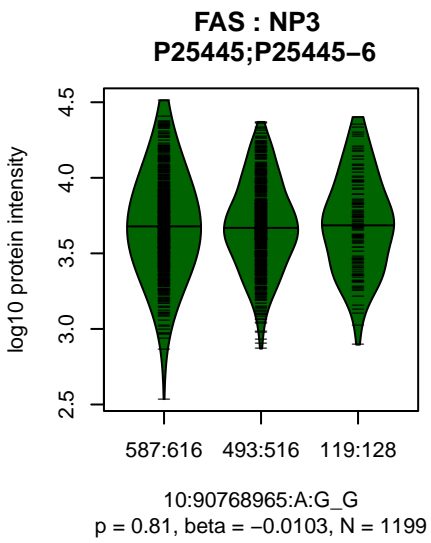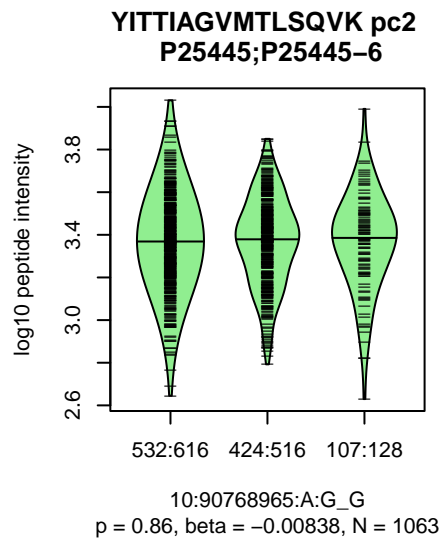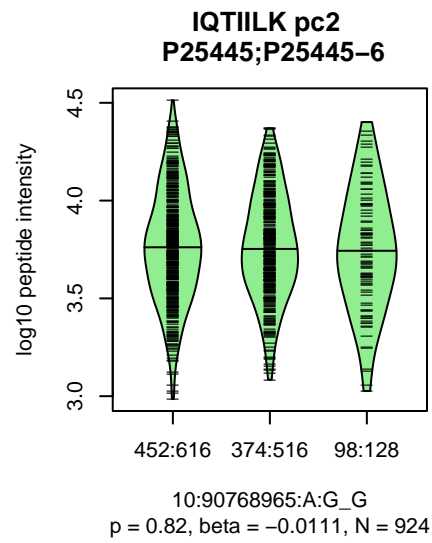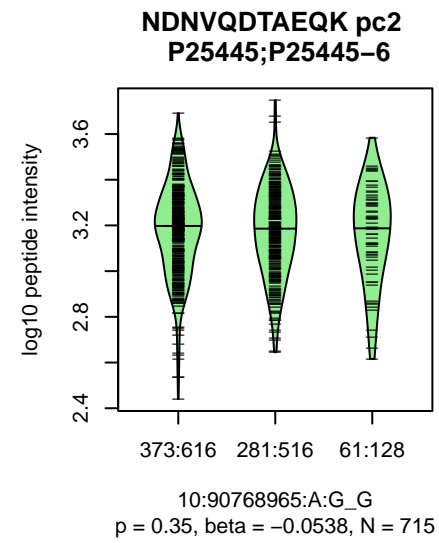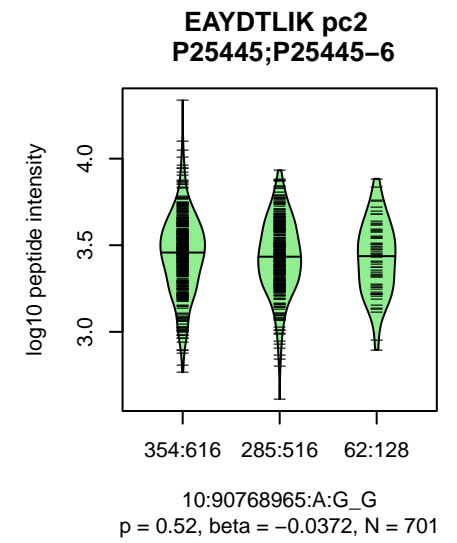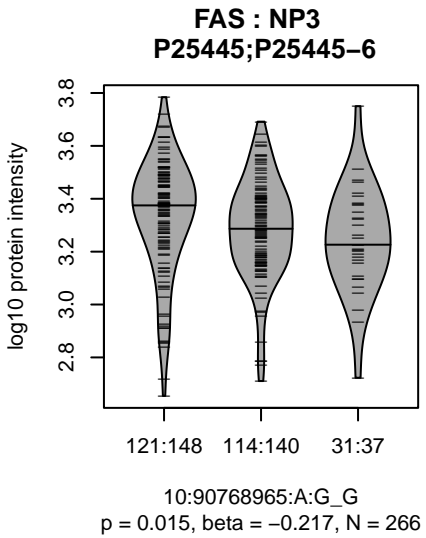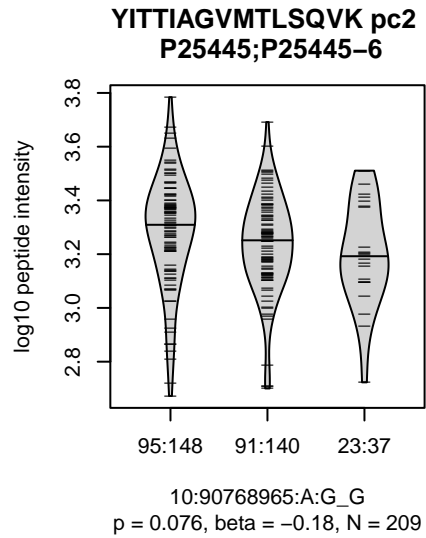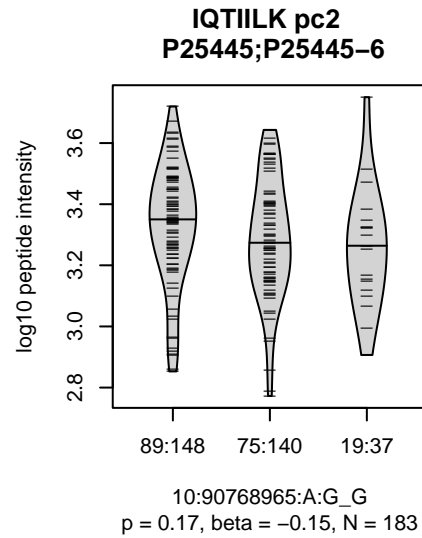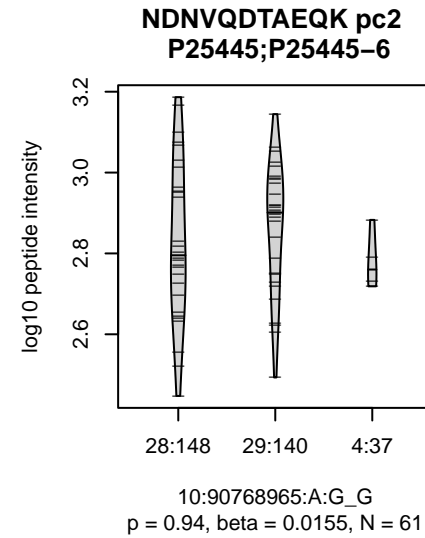

Assay Target: FAS  
 Olink UniProt: P25445  
 deCODE rsID: rs7911226  
 Proxy rsID: rs7911226  
 deCODE: 10:89009208:G:A  
 Proxy SNP: 10:90768965:A:G  
 deCODE log10(p): 166.6  
 deCODE BETA: -0.25  
 -:-:-:-  
 1063:924:715:701

**SELPLG : NP2**  
**Q14242-2**

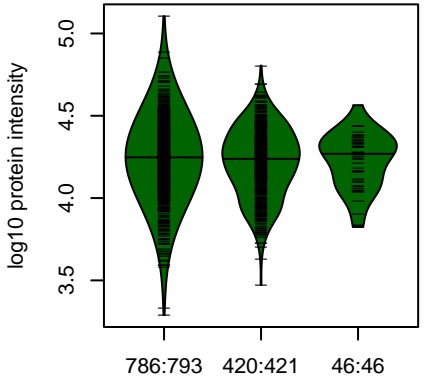

12:109013956:G:A\_A  
p = 0.13, beta = -0.0757, N = 1252

**SPGLTPEPR pc2**  
**A0A0C4DFY0;Q14242;Q14242-2**

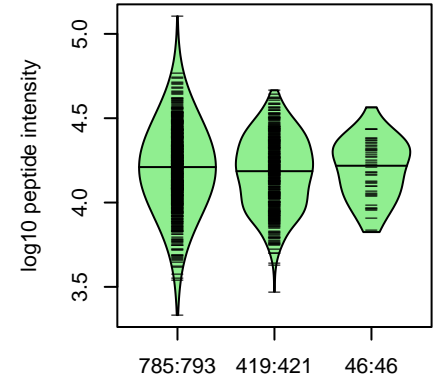

12:109013956:G:A\_A  
p = 0.12, beta = -0.0775, N = 1250

**EDREGDDLHLSFLP pc3**  
**A0A0C4DFY0;Q14242;Q14242-2**

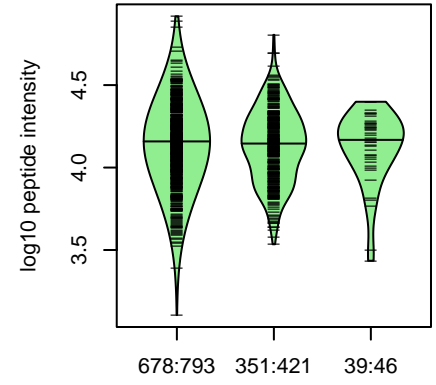

12:109013956:G:A\_A  
p = 0.58, beta = -0.0299, N = 1068

**ALGPLLAR pc2**  
**A0A0C4DFY0;Q14242;Q14242-2**

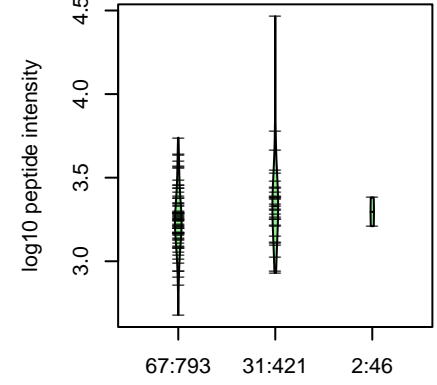

12:109013956:G:A\_A  
p = 0.057, beta = 0.354, N = 100

**SELPLG : NP2**  
**A0A0C4DFY0;Q14242;Q14242-2**

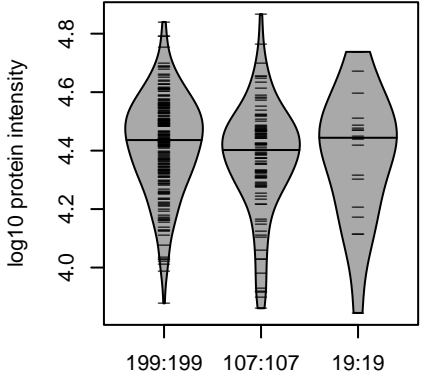

12:109013956:G:A\_A  
p = 0.072, beta = -0.163, N = 325

**SPGLTPEPR pc2**  
**A0A0C4DFY0;Q14242;Q14242-2**

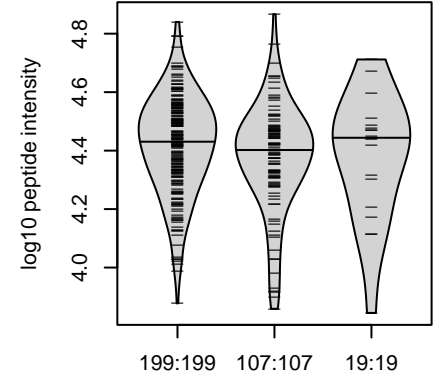

12:109013956:G:A\_A  
p = 0.074, beta = -0.162, N = 325

Assay Target: SELPLG  
Olink UniProt: Q14242  
deCODE rsID: rs73191242  
Proxy rsID: rs73191242  
deCODE: 12:108620180:A:G  
Proxy SNP: 12:109013956:G:A  
deCODE log10(p): 166.5  
deCODE BETA: -0.28  
-:-:-  
1250:1068:100

**CCL23 : NP3**  
**P55773**

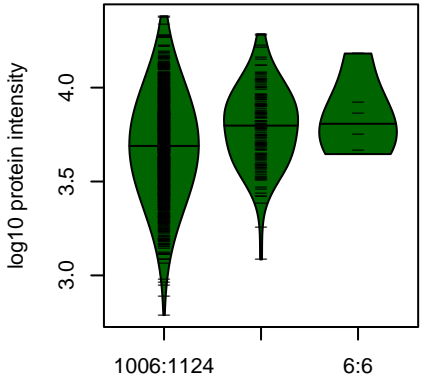

17:34310702:A:G\_G  
p = 8.9e-06, beta = 0.384, N = 1136

**PGVIFLTK pc2**  
**P55773;P55773-2;P10147;Q16663**

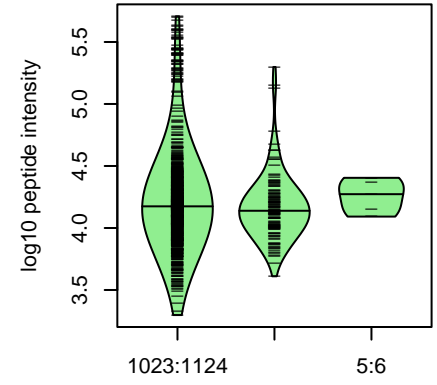

17:34310702:A:G\_G  
p = 0.61, beta = -0.0451, N = 1146

**LPLENPVLLDR pc2**  
**P55773**

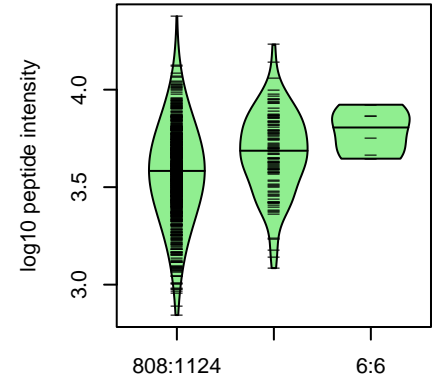

17:34310702:A:G\_G  
p = 6.5e-07, beta = 0.449, N = 927

**FHATSADCCISYTPR pc3**  
**P55773**

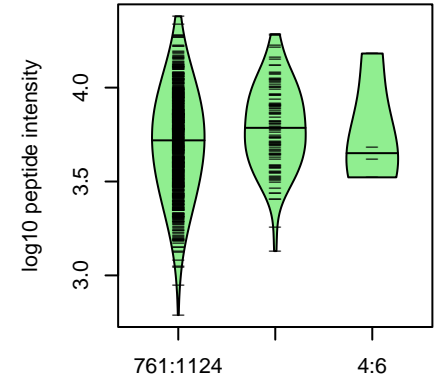

17:34310702:A:G\_G  
p = 0.0056, beta = 0.269, N = 867

**DAETEFMMSK pc2**  
**P55773;P55773-2**

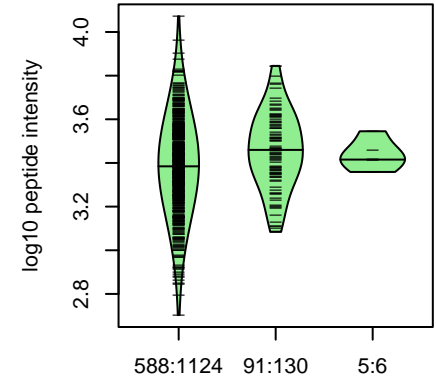

17:34310702:A:G\_G  
p = 0.005, beta = 0.284, N = 684

**CCL23 : NP3**  
**P55773**

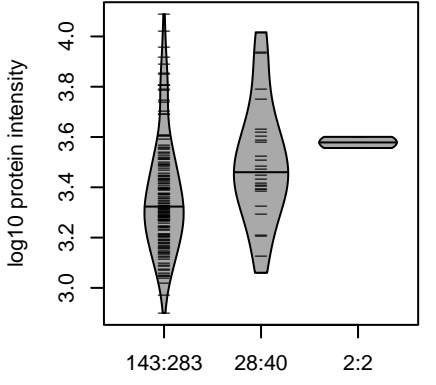

17:34310702:A:G\_G  
p = 0.00023, beta = 0.647, N = 173

**PGVIFLTK pc2**  
**P55773;P55773-2;P10147;Q16663**

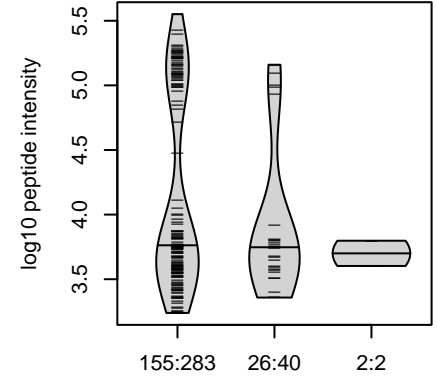

17:34310702:A:G\_G  
p = 0.21, beta = -0.227, N = 183

**LPLENPVLLDR pc2**  
**P55773**

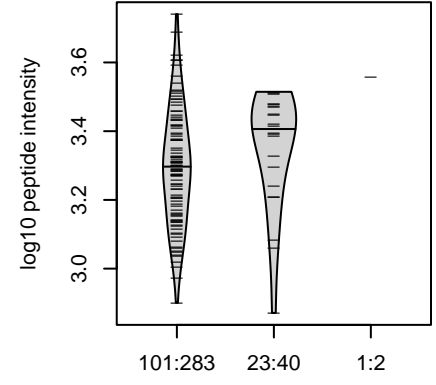

17:34310702:A:G\_G  
p = 0.034, beta = 0.437, N = 125

**FHATSADCCISYTPR pc3**  
**P55773**

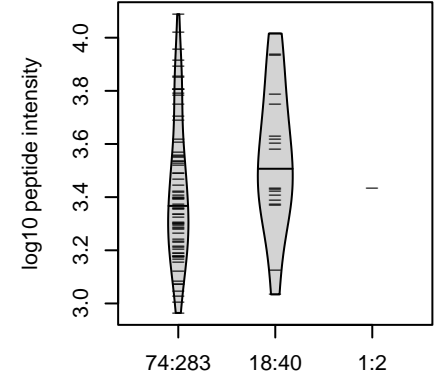

17:34310702:A:G\_G  
p = 0.027, beta = 0.504, N = 93

Assay Target: CCL23  
Olink UniProt: P55773  
deCODE rsID: rs41341749  
Proxy rsID: rs41341749  
deCODE: 17:35983666:G:A  
Proxy SNP: 17:34310702:A:G  
deCODE log10(p): 165.5  
deCODE BETA: 0.61  
-\*.\*\*\*  
1146:927:867:684







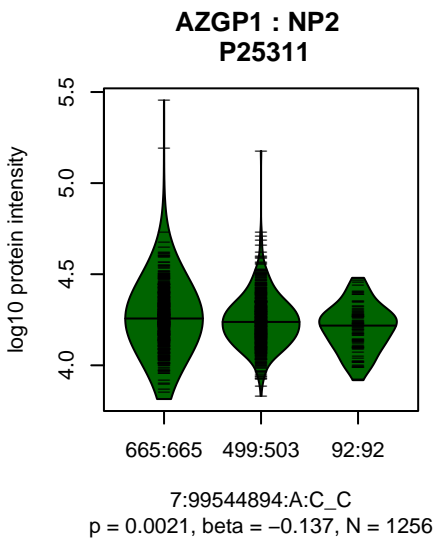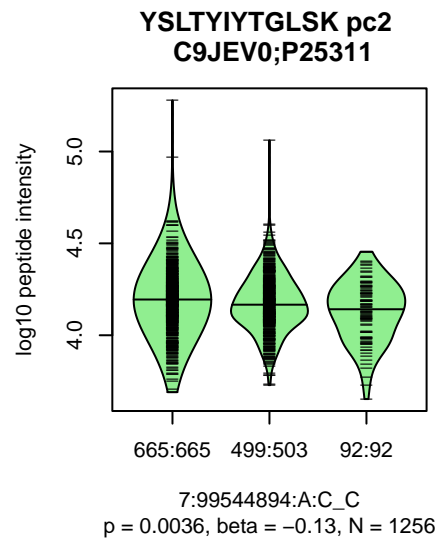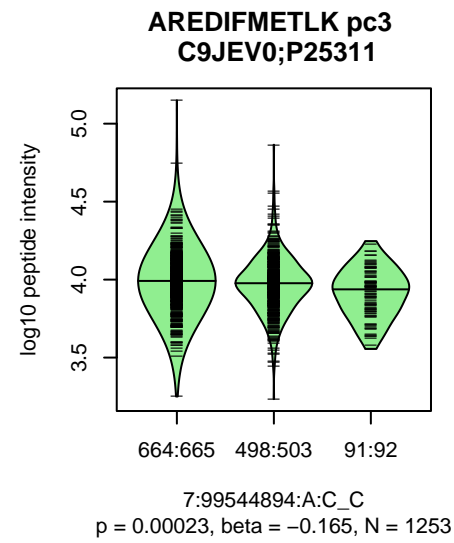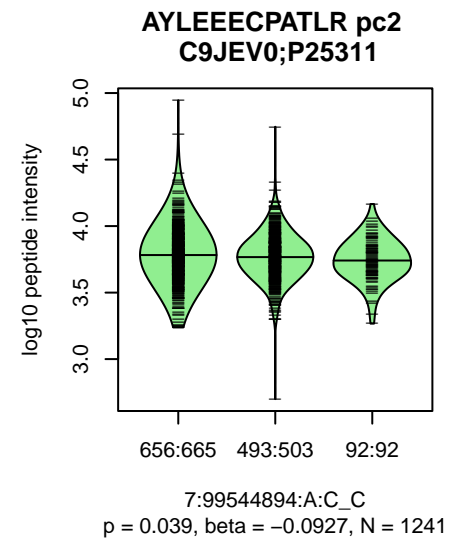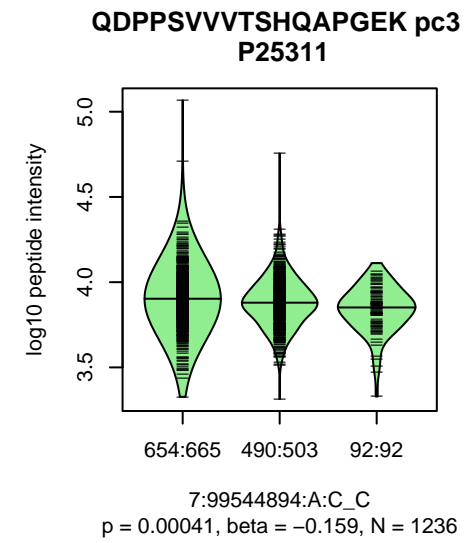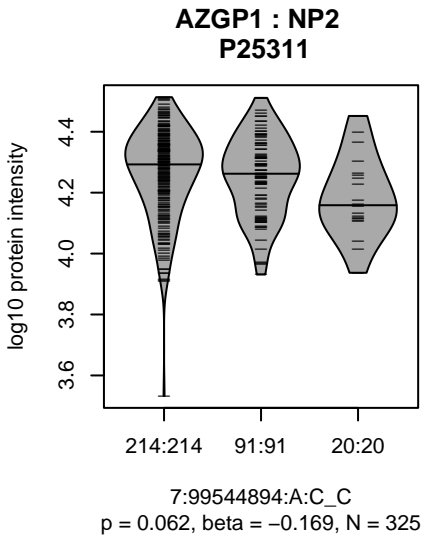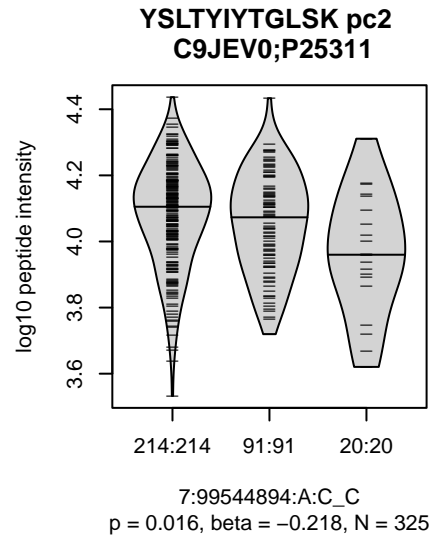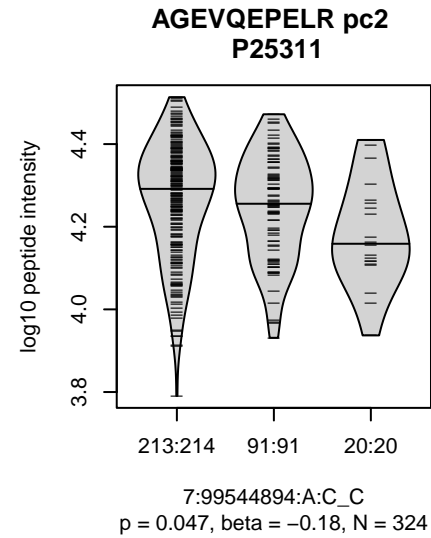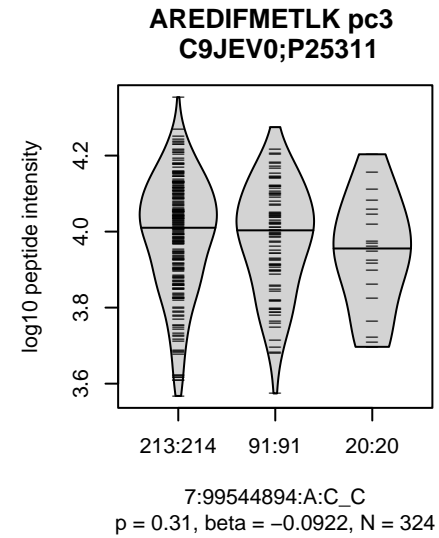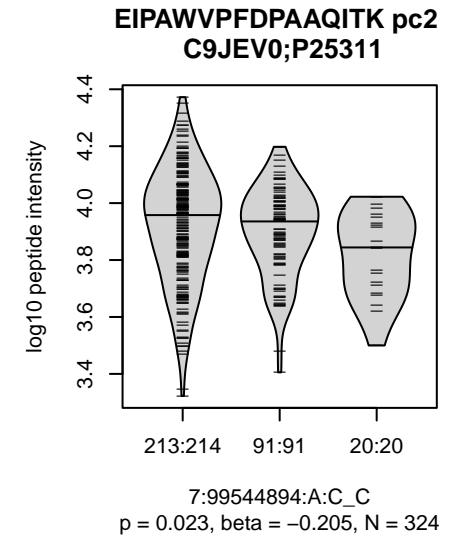

Assay Target: AZGP1  
 Olink UniProt: P25311  
 deCODE rsID: rs2525546  
 Proxy rsID: rs2040787  
 deCODE: 7:99954321:T:C  
 Proxy SNP: 7:99544894:A:C  
 deCODE log10(p): 157.9  
 deCODE BETA: -0.24  
 \*:\*:-:\*:\*:-:\*:-:\*:-:\*:-:\*:-:NA  
 1256:1253:1241:1236:1231:118

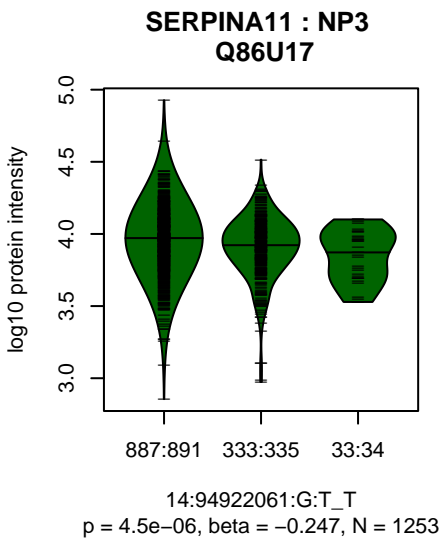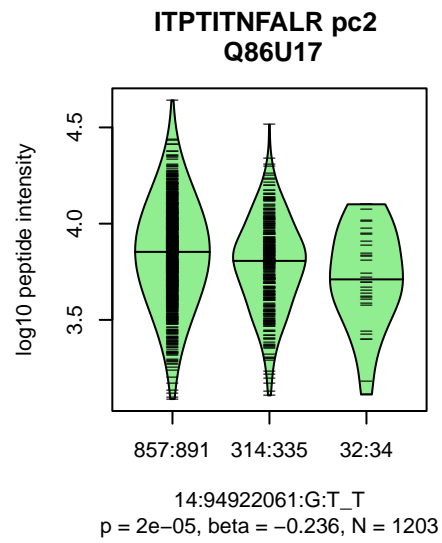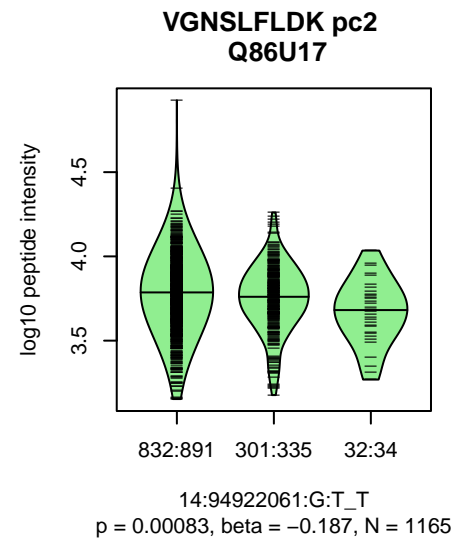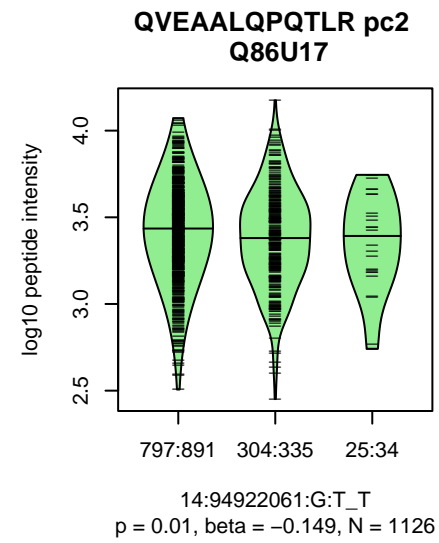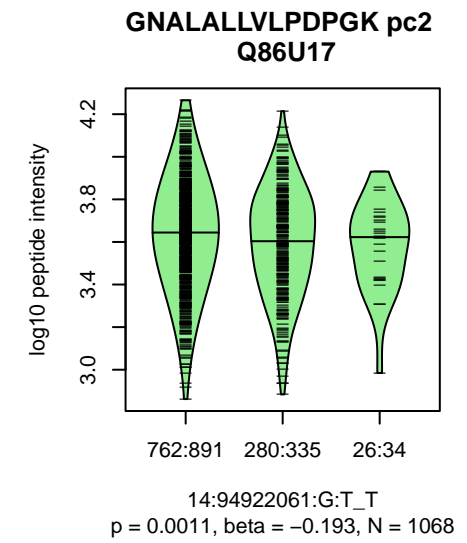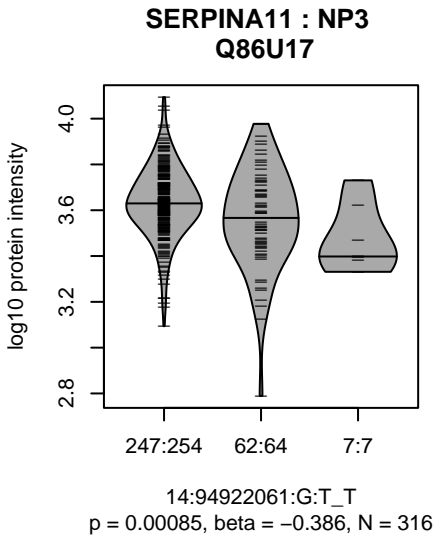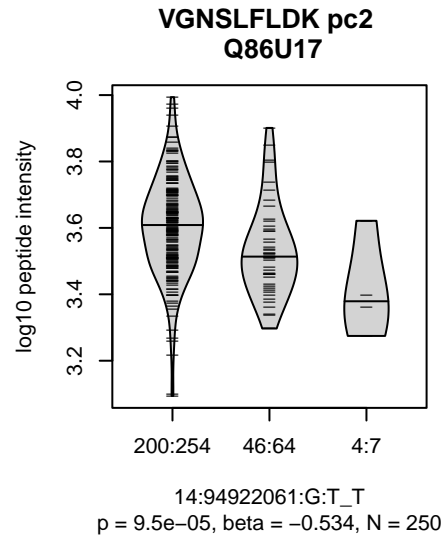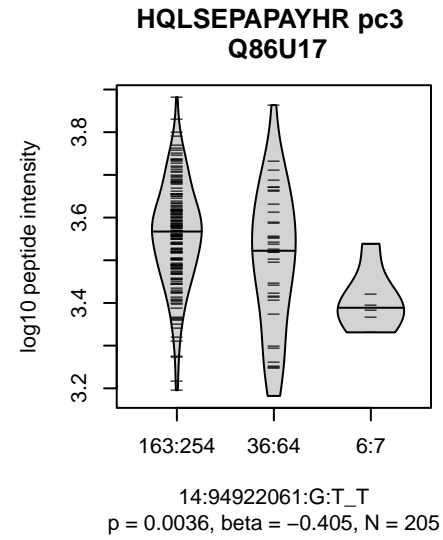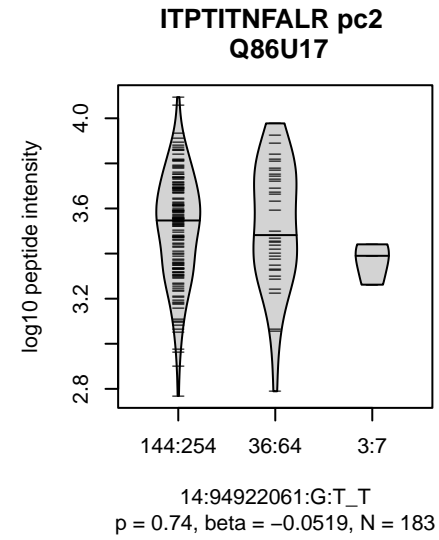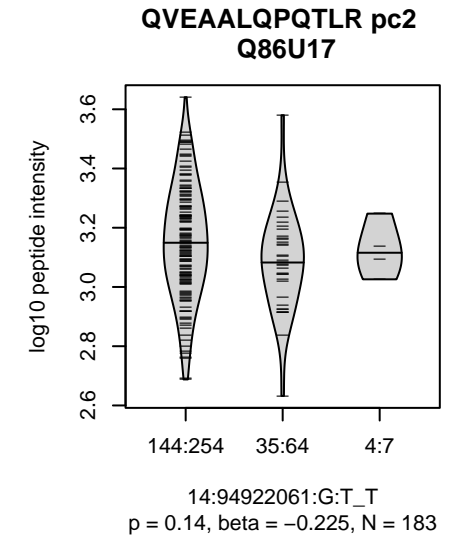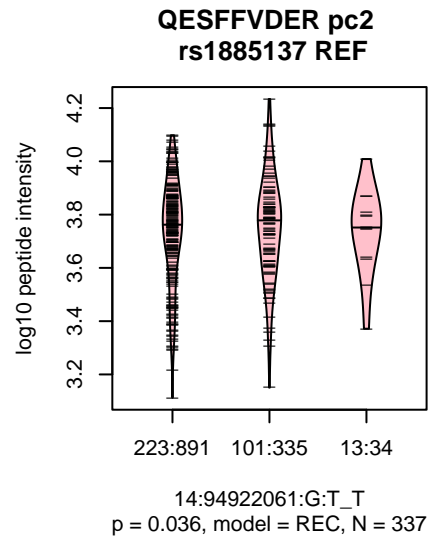

Assay Target: SERPINA11  
 Olink UniProt: Q86U17  
 deCODE rsID: rs72631635  
 Proxy rsID: rs72631635  
 deCODE: 14:94455724:T:G  
 Proxy SNP: 14:94922061:G:T  
 deCODE log10(p): 157.1  
 deCODE BETA: -0.3  
 \*.-:.\*.\*.\*.-:.\*.\*.-:NA  
 1203:1165:1126:1068:1019:931

**SORD : NP4  
Q00796**

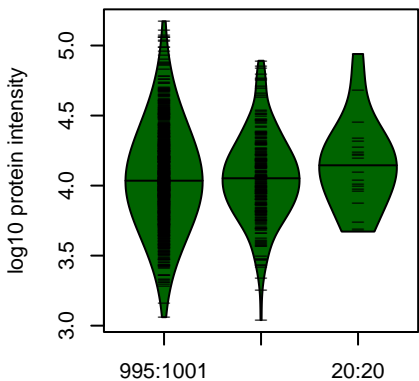

15:45258205:A:T\_T  
p = 0.58, beta = 0.0348, N = 1252

**AMGAAQVVVTDLSATR pc2  
A0A6I8PIS1;Q00796**

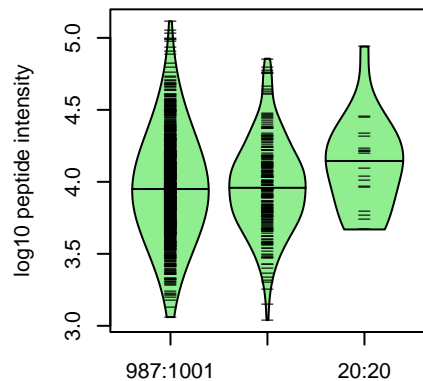

15:45258205:A:T\_T  
p = 0.31, beta = 0.0636, N = 1242

**YCNTWPVAISMLASK pc2  
Q00796**

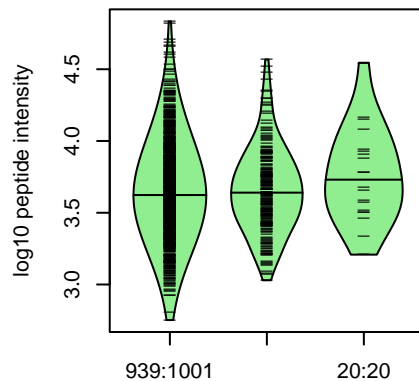

15:45258205:A:T\_T  
p = 0.36, beta = 0.0586, N = 1179

**VAIEPGAPR pc2  
A0A6I8PIS1;Q00796**

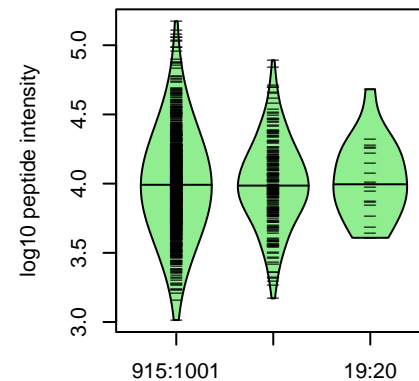

15:45258205:A:T\_T  
p = 0.84, beta = 0.0131, N = 1152

**EIGADLVLQISK pc2  
A0A6I8PIS1;Q00796**

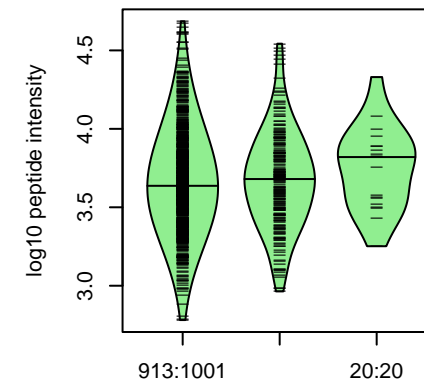

15:45258205:A:T\_T  
p = 0.35, beta = 0.0598, N = 1150

**SORD : NP4  
Q00796**

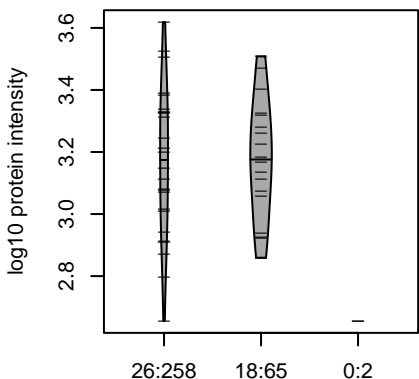

15:45258205:A:T\_T  
p = 0.61, beta = -0.151, N = 44

**AMGAAQVVVTDLSATR pc2  
A0A6I8PIS1;Q00796**

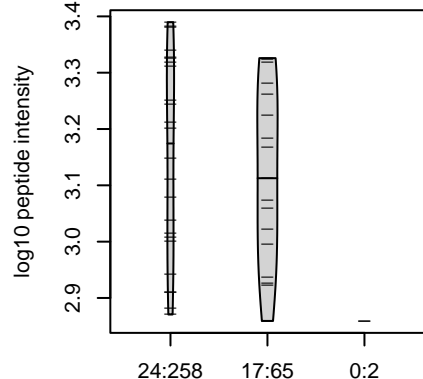

15:45258205:A:T\_T  
p = 0.45, beta = -0.228, N = 41

Assay Target: SORD  
Olink UniProt: Q00796  
deCODE rsID: rs72722045  
Proxy rsID: rs72722045  
deCODE: 15:44966007:T:A  
Proxy SNP: 15:45258205:A:T  
deCODE log10(p): 152.1  
deCODE BETA: 0.3  
-----  
1242:1179:1152:1150:995:979:8

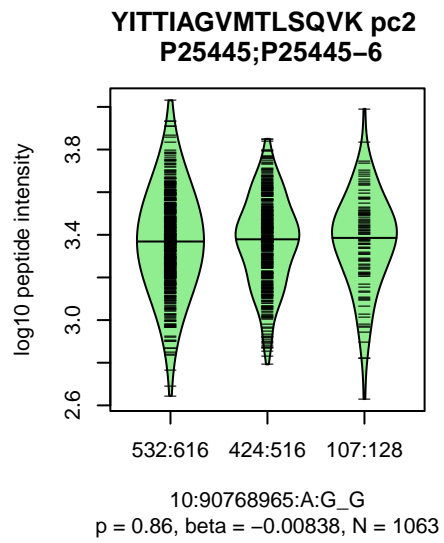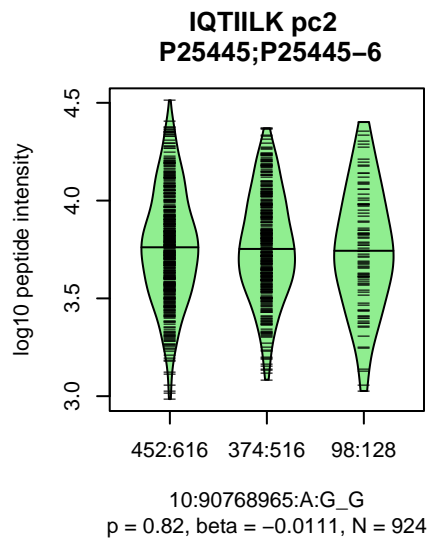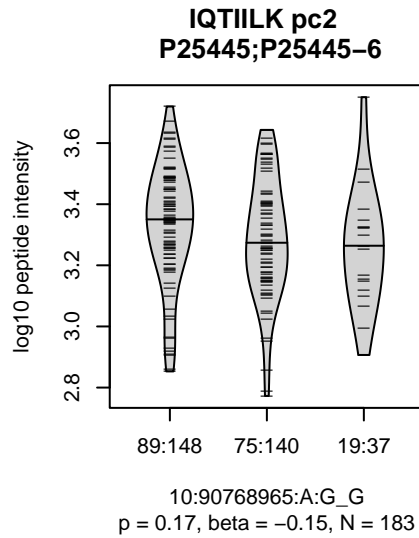

Assay Target: FAS  
 Olink UniProt: P25445  
 deCODE rsID: rs7911226  
 Proxy rsID: rs7911226  
 deCODE: 10:89009208:G:A  
 Proxy SNP: 10:90768965:A:G  
 deCODE log10(p): 152  
 deCODE BETA: -0.24  
 -:-:-:-  
 1063:924:715:701

**NCAM1 : NP2  
P13591**

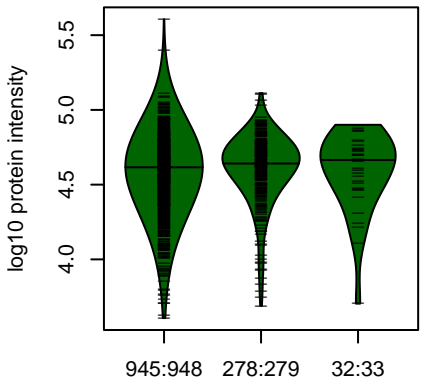

11:113133676:T:G\_G  
p = 0.091, beta = 0.0951, N = 1255

**FFLCQVAGDAK pc2  
0A087WWD4;A0A087WX77;H7BYX6;0A087WWD4;A0A087WX77;H7BYX6;V75;A0A087WWD4;A0A087WX77;H7B0A087WWD4;A0A087WX77;H7BYX6;**

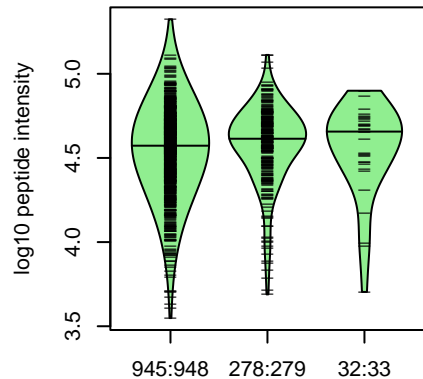

11:113133676:T:G\_G  
p = 0.045, beta = 0.113, N = 1255

**YIFSDSSQLTIK pc2**

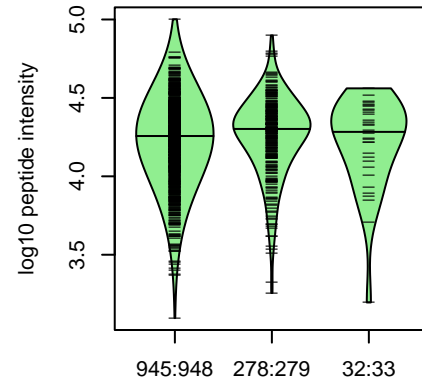

11:113133676:T:G\_G  
p = 0.11, beta = 0.0891, N = 1255

**EASMEGIVTIVGLKPETTYAVR pc3**

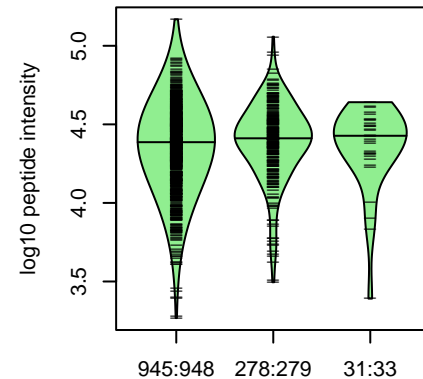

11:113133676:T:G\_G  
p = 0.079, beta = 0.0994, N = 1254

**FIVLSNYYLQIR pc2**

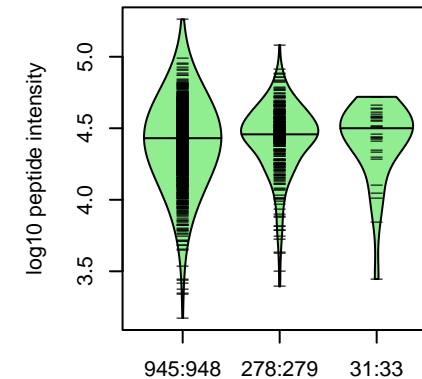

11:113133676:T:G\_G  
p = 0.054, beta = 0.109, N = 1254

**NCAM1 : NP2  
P13591**

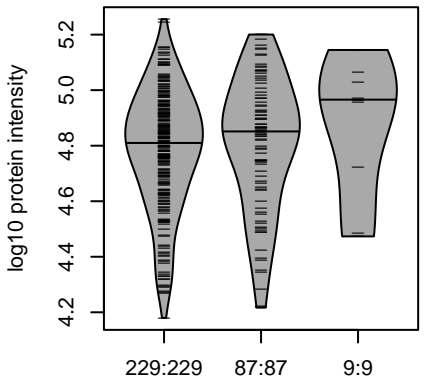

11:113133676:T:G\_G  
p = 0.23, beta = 0.126, N = 325

**AGEQDATIHLK pc2**

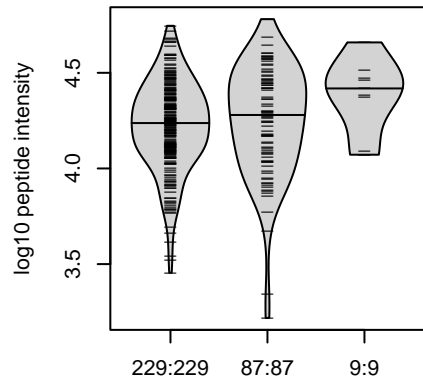

11:113133676:T:G\_G  
p = 0.1, beta = 0.17, N = 325

**ALSSEWKPEIR pc3**

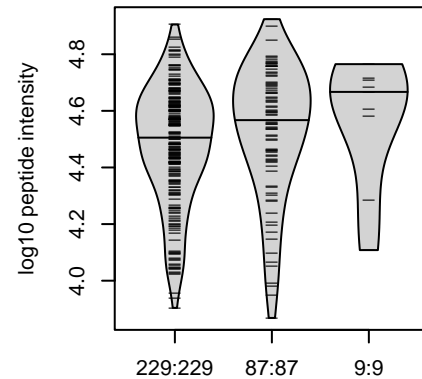

11:113133676:T:G\_G  
p = 0.034, beta = 0.221, N = 325

**AVGEEVWHSK pc2**

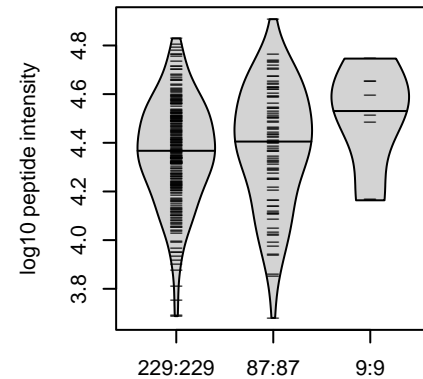

11:113133676:T:G\_G  
p = 0.1, beta = 0.17, N = 325

**EASMEGIVTIVGLKPETTYAVR pc3**

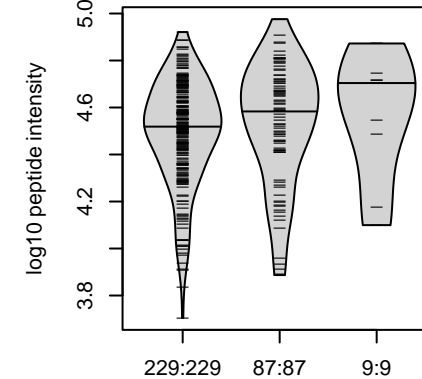

11:113133676:T:G\_G  
p = 0.12, beta = 0.164, N = 325

Assay Target: NCAM1  
Olink UniProt: P13591  
deCODE rsID: rs2288158  
Proxy rsID: rs2288158  
deCODE: 11:113262954:G:T  
Proxy SNP: 11:113133676:T:G  
deCODE log10(p): 148.6  
deCODE BETA: 0.33  
-----\*-----  
1255:1255:1254:1254:1244:124



**ESD : NP3  
P10768**

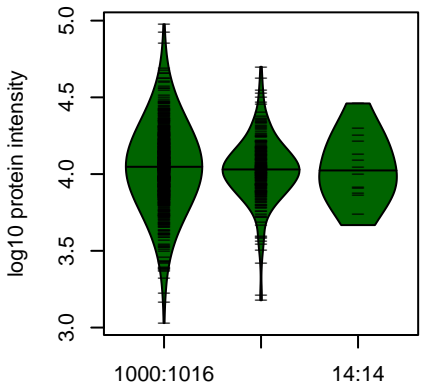

13:47351403:T:C\_C  
p = 0.28, beta = -0.071, N = 1242

**AYDATHLVK pc2  
U3KQT1;X6RA14;P10768**

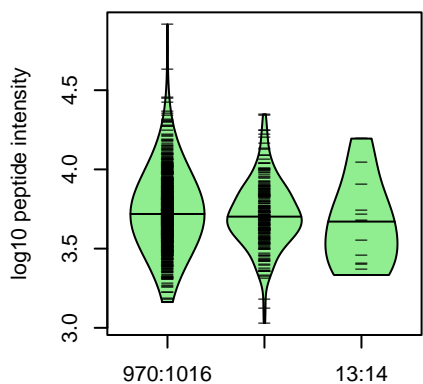

13:47351403:T:C\_C  
p = 0.13, beta = -0.1, N = 1204

**SGYHQSASEHGLVVIAPDTSR pc4  
U3KQT1;X6RA14;P10768**

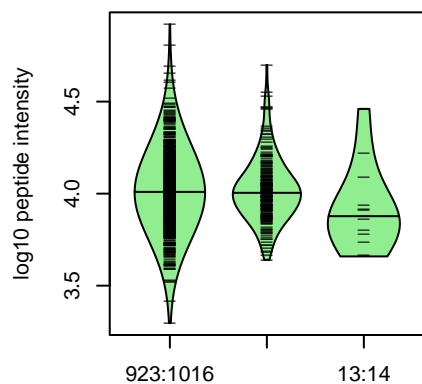

13:47351403:T:C\_C  
p = 0.47, beta = -0.05, N = 1138

**SYPGSQLDILIDQK pc2  
U3KQT1;X6RA14;P10768**

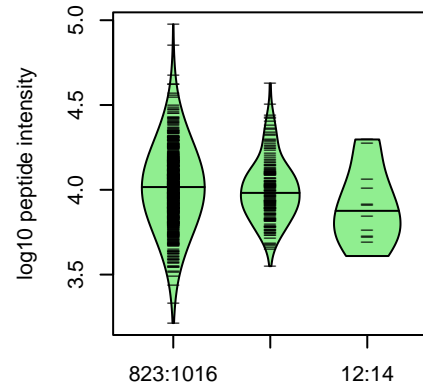

13:47351403:T:C\_C  
p = 0.082, beta = -0.128, N = 1009

**VFEHDSVELNCK pc3  
U3KQT1;P10768**

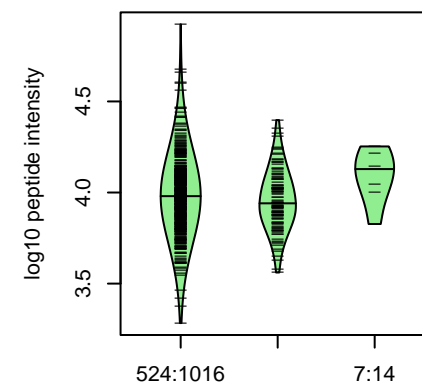

13:47351403:T:C\_C  
p = 0.65, beta = -0.0422, N = 639

**ESD : NP3  
P10768**

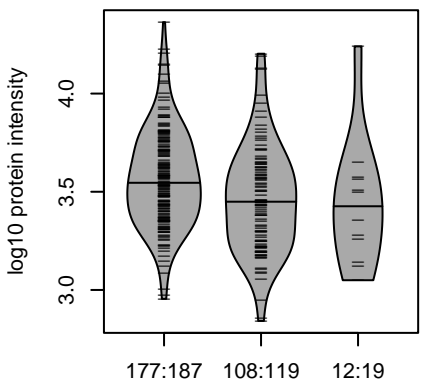

13:47351403:T:C\_C  
p = 8.7e-05, beta = -0.388, N = 297

**AYDATHLVK pc2  
U3KQT1;X6RA14;P10768**

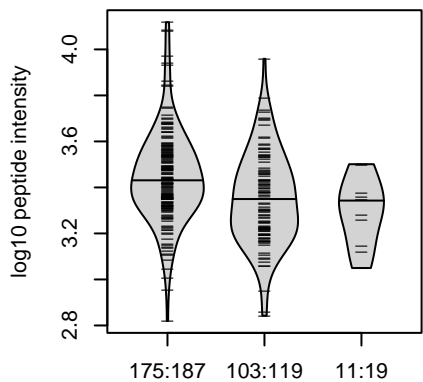

13:47351403:T:C\_C  
p = 7.1e-06, beta = -0.452, N = 289

**SYPGSQLDILIDQK pc2  
U3KQT1;X6RA14;P10768**

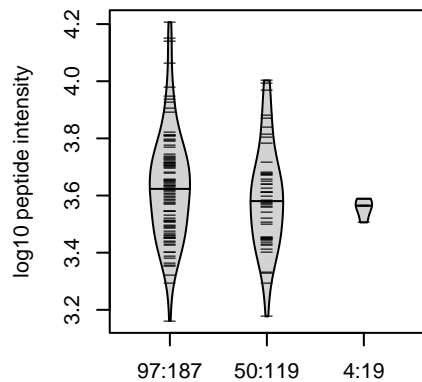

13:47351403:T:C\_C  
p = 0.11, beta = -0.237, N = 151

**SGYHQSASEHGLVVIAPDTSR pc4  
U3KQT1;X6RA14;P10768**

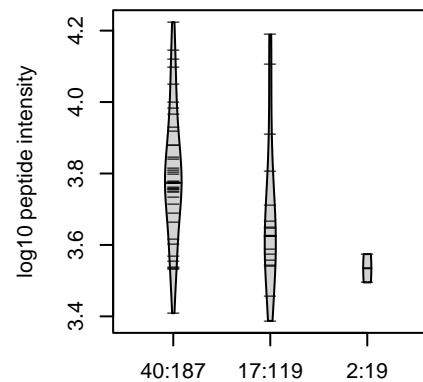

13:47351403:T:C\_C  
p = 0.0066, beta = -0.604, N = 59

**MSIFGHSMGGH GALICK pc3  
U3KQT1;X6RA14;P10768**

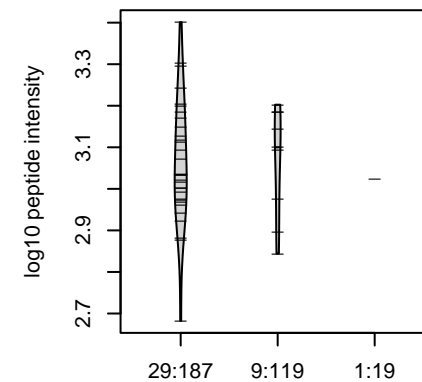

13:47351403:T:C\_C  
p = 0.69, beta = -0.12, N = 39

**AFSEYLGTDQSK pc2  
rs9778 ALT**

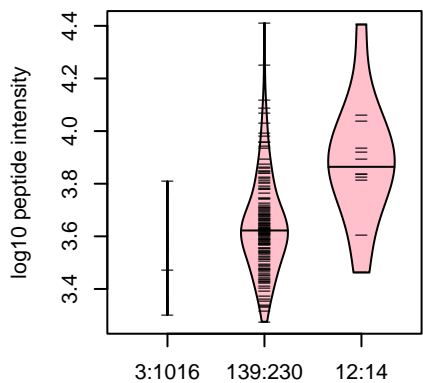

13:47351403:T:C\_C  
p = 4.6e-125, model = REC, N = 154

**AFSGYLGTDQSK pc2  
rs9778 REF**

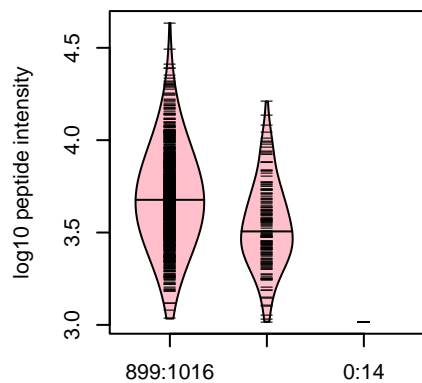

13:47351403:T:C\_C  
p = 2.6e-19, model = REC, N = 1052

Assay Target: ESD  
Olink UniProt: P10768  
deCODE rsID: rs2298087  
Proxy rsID: rs2298087  
deCODE: 13:46777268:C:T  
Proxy SNP: 13:47351403:T:C  
deCODE log10(p): 147  
deCODE BETA: -0.36  
-----NA  
1204:1138:1009:639:485:286:2



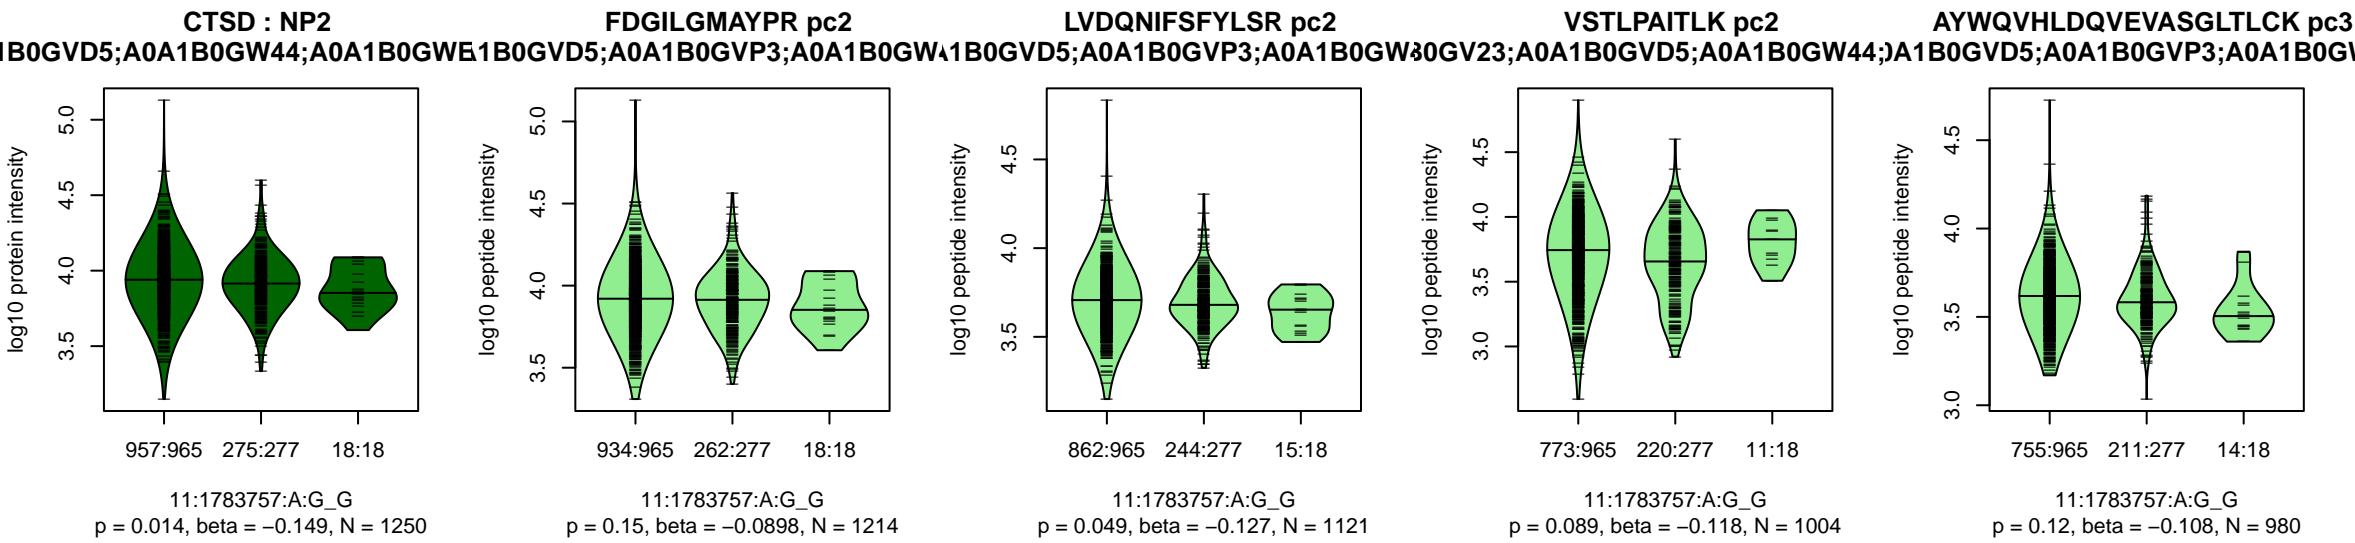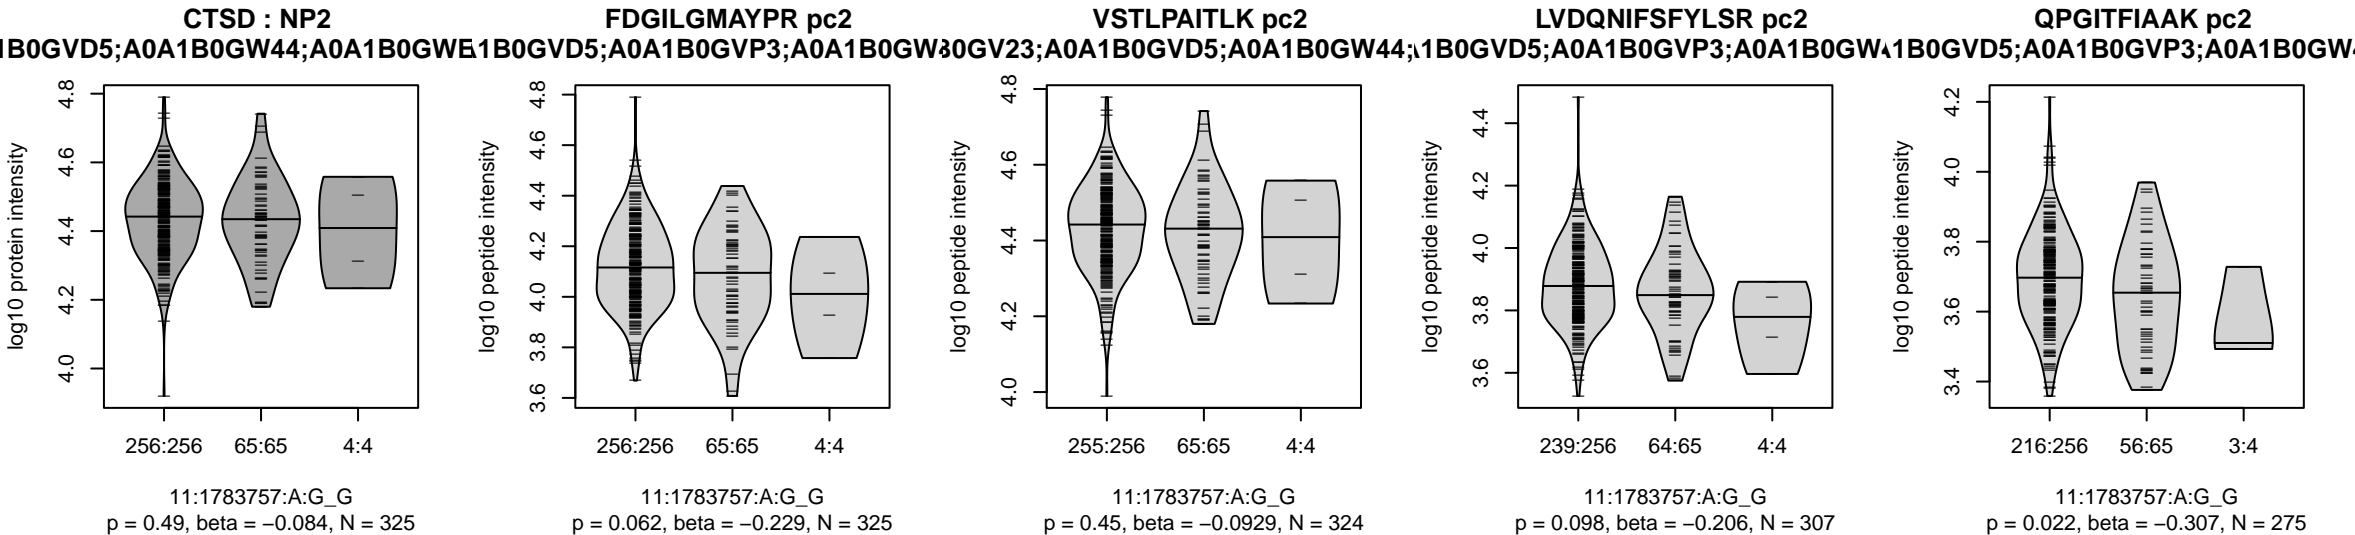

Assay Target: CTSD  
 Olink UniProt: P07339  
 deCODE rsID: rs55861089  
 Proxy rsID: rs55861089  
 deCODE: 11:1762527:G:A  
 Proxy SNP: 11:1783757:A:G  
 deCODE log10(p): 141.9  
 deCODE BETA: -0.33  
 -----NA  
 1214:1121:1004:980:964:486:40

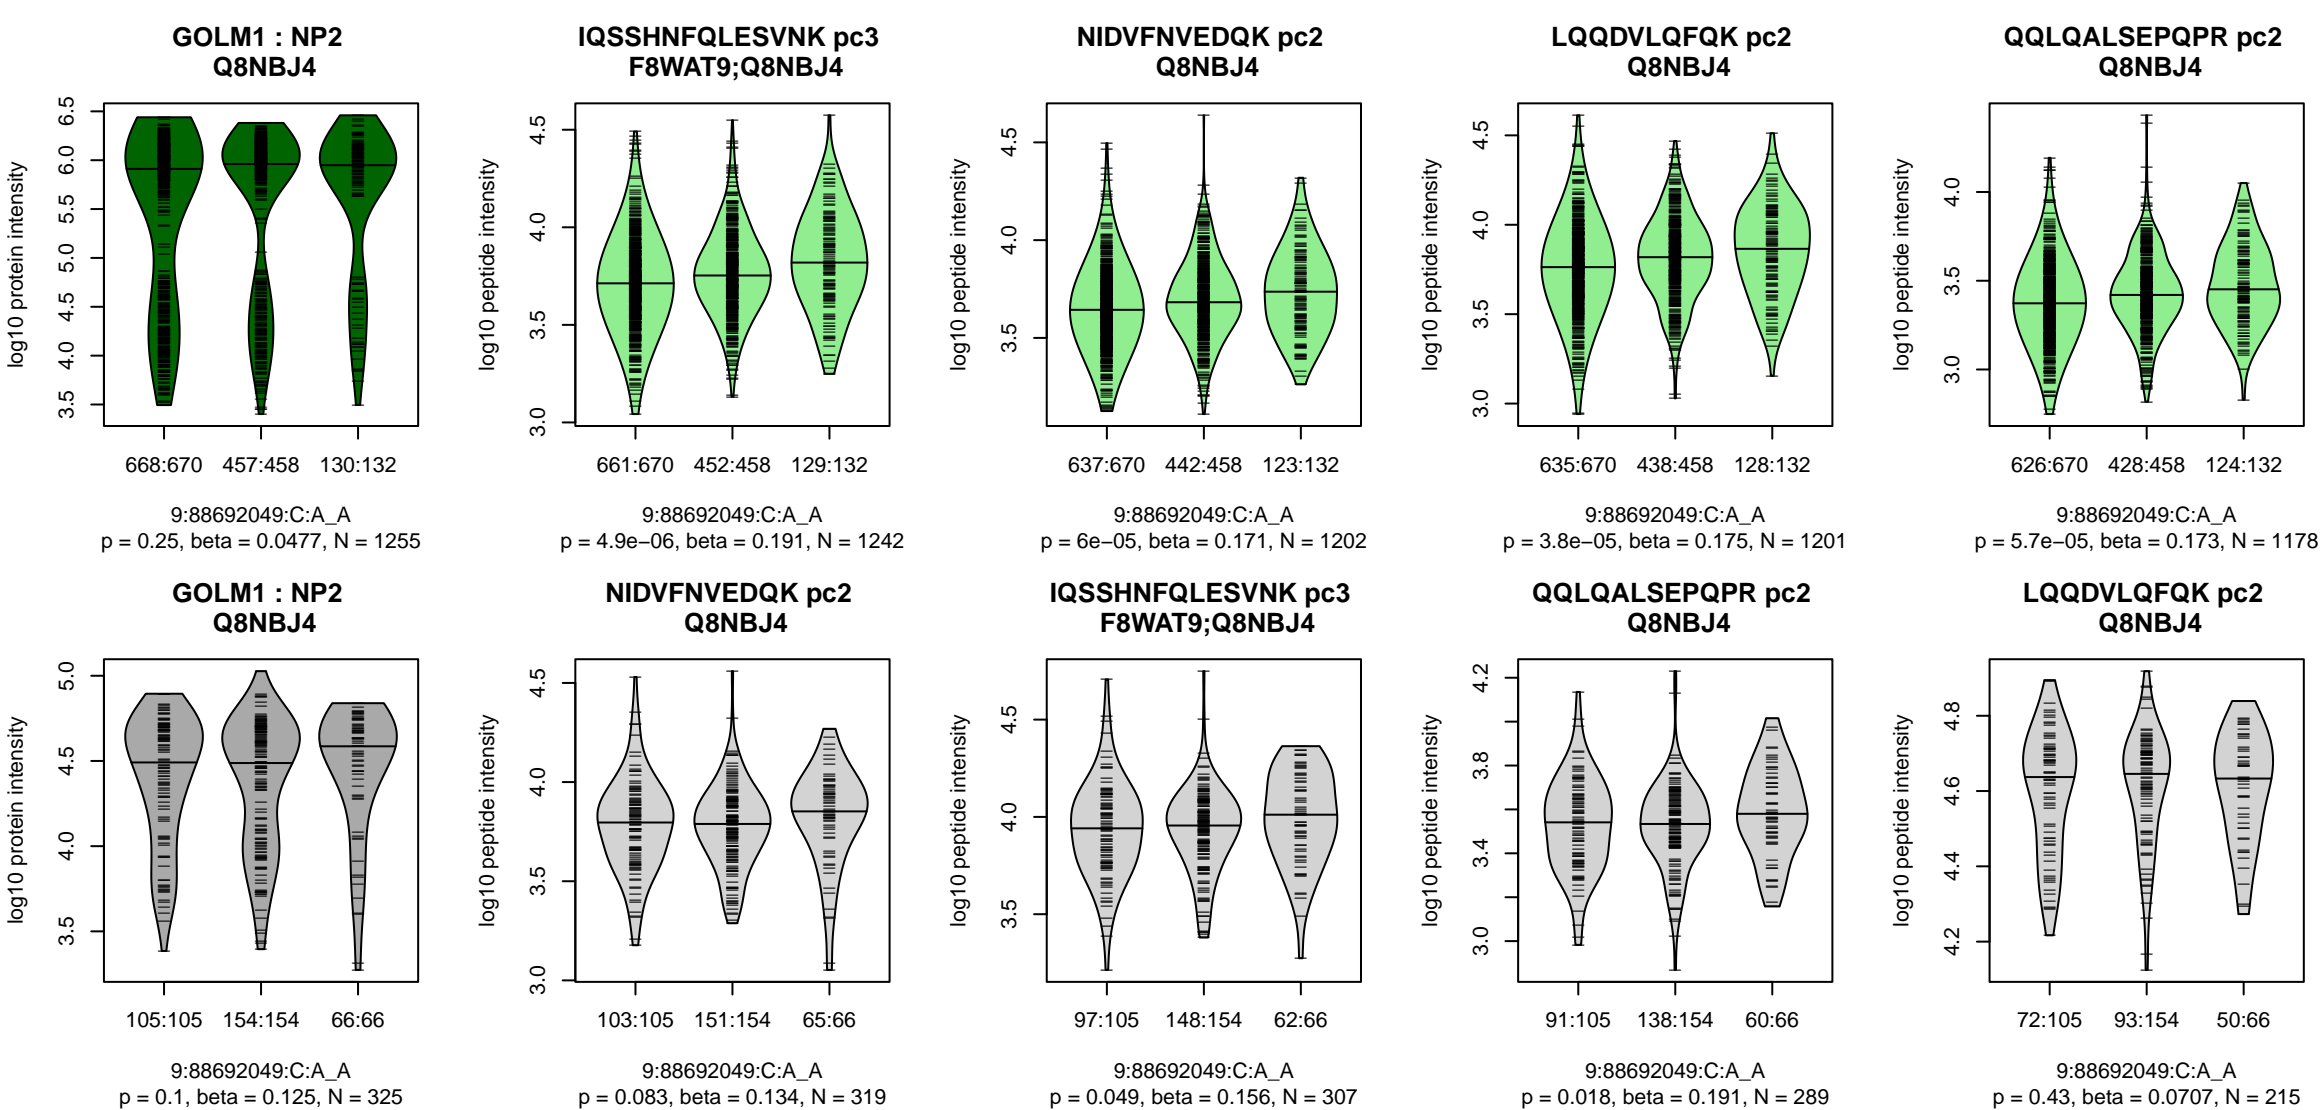

Assay Target: GOLM1  
 Olink UniProt: Q8NBJ4  
 deCODE rsID: rs4333693  
 Proxy rsID: rs4333693  
 deCODE: 9:86077134:A:C  
 Proxy SNP: 9:88692049:C:A  
 deCODE log10(p): 140.8  
 deCODE BETA: 0.26  
 \*.\*.\*.\*.\*.-:.-:.\*.-:.-:NA  
 1242:1202:1201:1178:1081:950

**ACP5 : NP3**  
**P13686**

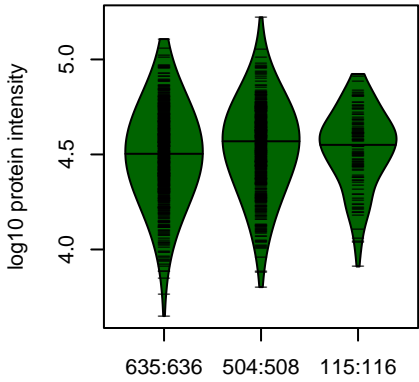

19:11706658:C:G\_G  
p = 0.021, beta = 0.0992, N = 1254

**WNFPSPFYR pc2**  
**P13686**

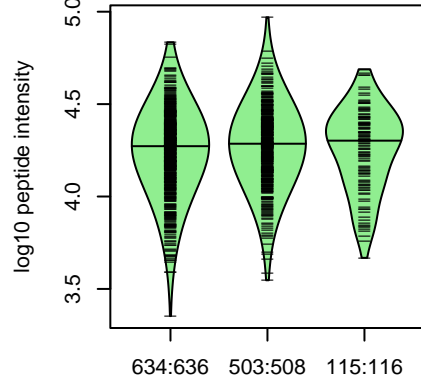

19:11706658:C:G\_G  
p = 0.091, beta = 0.0729, N = 1252

**EMTVTYIEASGK pc2**  
**P13686**

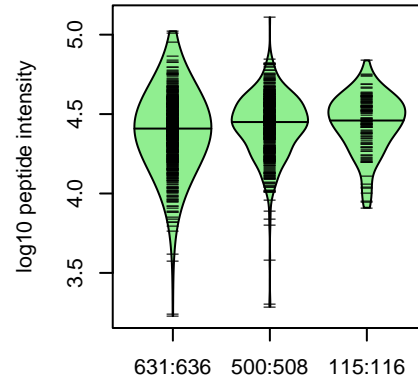

19:11706658:C:G\_G  
p = 0.001, beta = 0.141, N = 1246

**TQLSWLK pc2**  
**P13686**

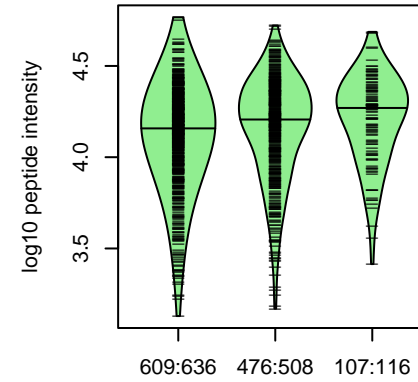

19:11706658:C:G\_G  
p = 0.00036, beta = 0.158, N = 1192

**FVAVGDWGGVNPAPFHTAR pc3**  
**P13686**

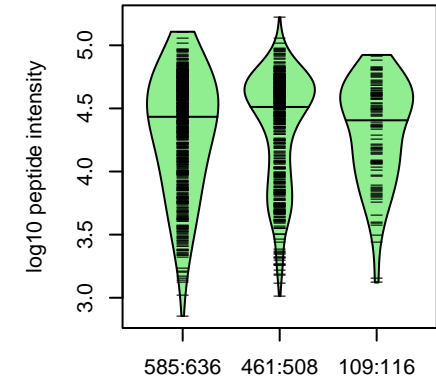

19:11706658:C:G\_G  
p = 0.39, beta = 0.0384, N = 1155

**ACP5 : NP3**  
**P13686**

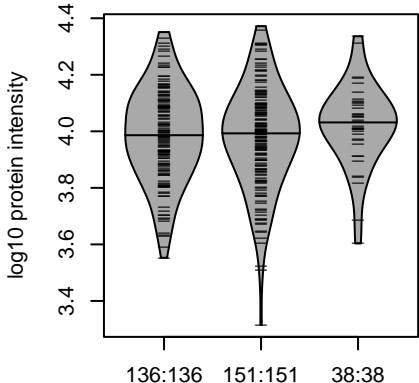

19:11706658:C:G\_G  
p = 0.49, beta = 0.0574, N = 325

**FVAVGDWGGVNPAPFHTAR pc3**  
**P13686**

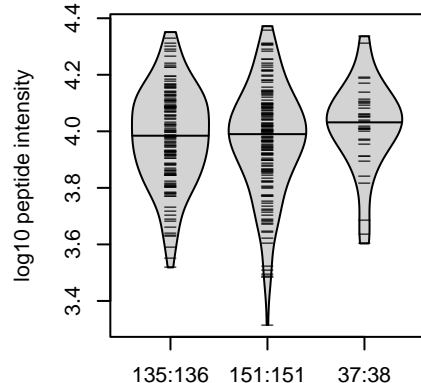

19:11706658:C:G\_G  
p = 0.58, beta = 0.0459, N = 323

**EMTVTYIEASGK pc2**  
**P13686**

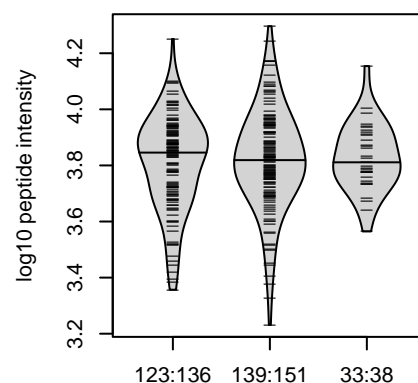

19:11706658:C:G\_G  
p = 0.62, beta = 0.0434, N = 295

**WNFPSPFYR pc2**  
**P13686**

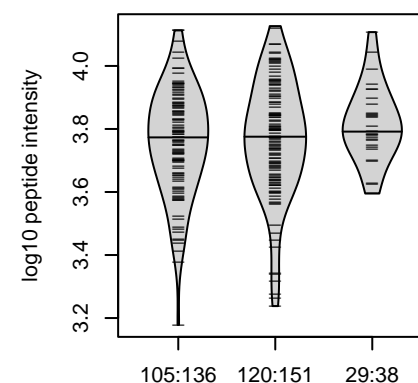

19:11706658:C:G\_G  
p = 0.15, beta = 0.134, N = 254

**TQLSWLK pc2**  
**P13686**

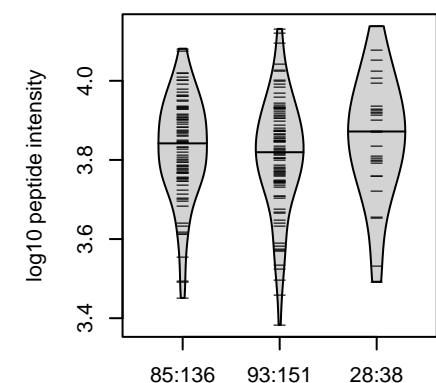

19:11706658:C:G\_G  
p = 0.57, beta = 0.0566, N = 206

**EDYVLVAGHYPVWSIAEHGPTHCLVK |**  
**rs2229531 REF**

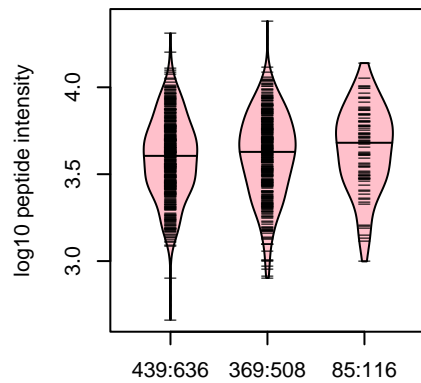

19:11706658:C:G\_G  
p = 0.15, model = REC, N = 893

Assay Target: ACP5  
Olink UniProt: P13686  
deCODE rsID: rs10403399  
Proxy rsID: rs10403399  
deCODE: 19:11595843:G:C  
Proxy SNP: 19:11706658:C:G  
deCODE log10(p): 139.3  
deCODE BETA: 0.24  
- - \* \* - - : - : - : -  
1252:1246:1192:1155:696:525

**CST3 : NP4  
P01034**

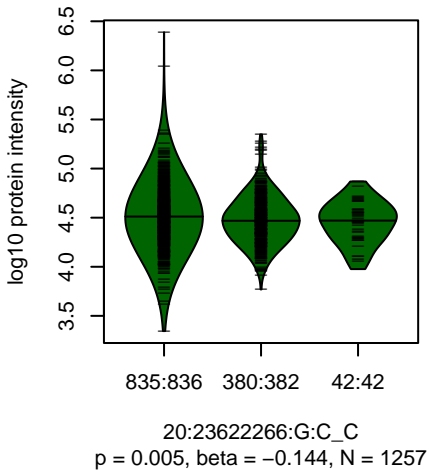

**LVGGPMDASVEEEGVR pc3  
P01034**

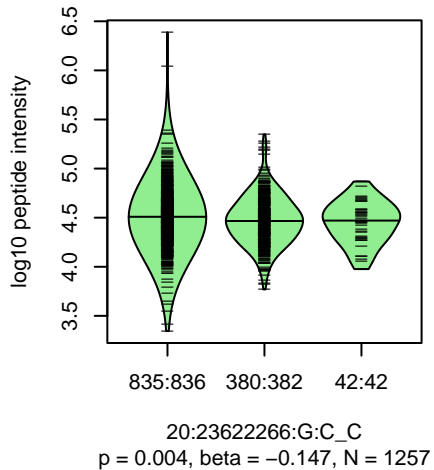

**ASNDMYHSR pc2  
P01034**

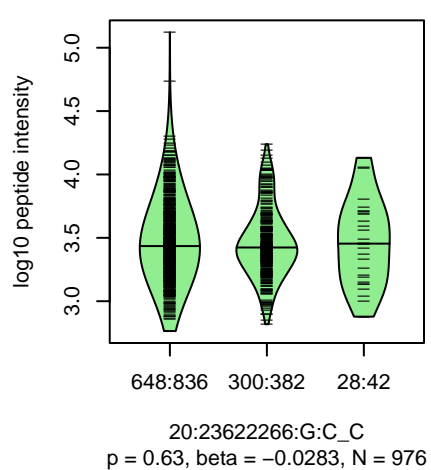

**ALDFAVGGEYNK pc2  
P01034**

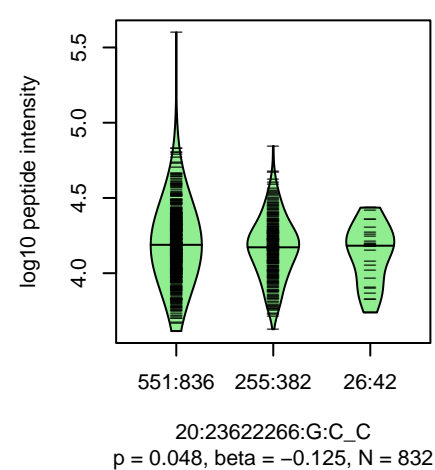

**LVGGPMDASVEEEGVR pc2  
P01034**

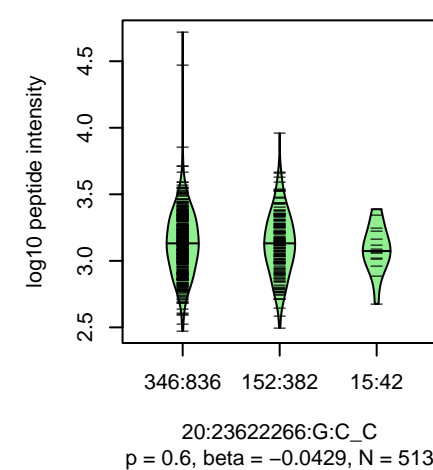

**CST3 : NP4  
P01034**

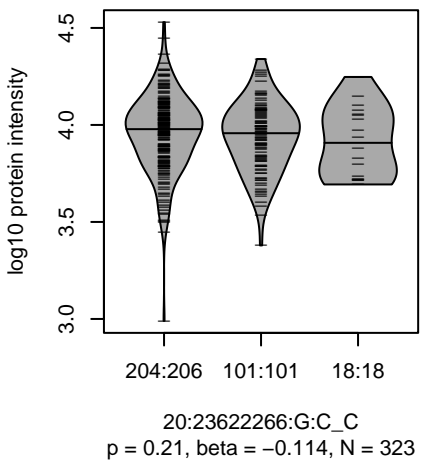

**LVGGPMDASVEEEGVR pc3  
P01034**

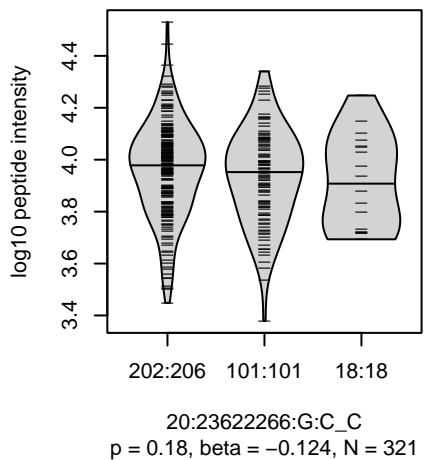

**ASNDMYHSR pc2  
P01034**

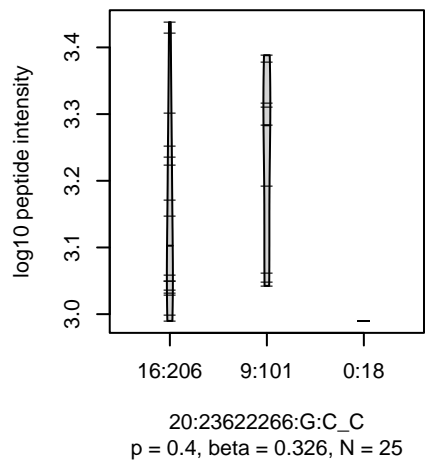

Assay Target: CST3  
 Olink UniProt: P01034  
 deCODE rsID: rs6114209  
 Proxy rsID: rs6114209  
 deCODE: 20:23641629:C:G  
 Proxy SNP: 20:23622266:G:C  
 deCODE log10(p): 137.9  
 deCODE BETA: -0.25  
 \*:-:--:--:--:--:--:--:NA:NA:NA  
 1257:976:832:513:510:184:160:

**RAB6B : NP1  
Q9NRW1**

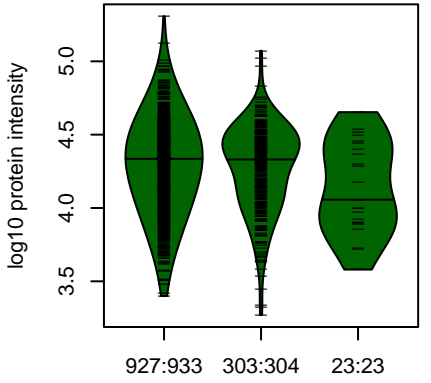

3:133607140:G:A\_A  
p = 0.074, beta = -0.103, N = 1253

**LVFLGEQSVGK pc2  
2;F5GX61;P20340-3;Q9NRW1;P20340340-4;Q9NRW1;Q9NRW1-2;P20340;P**

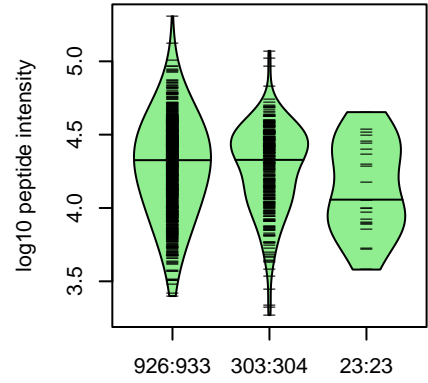

3:133607140:G:A\_A  
p = 0.14, beta = -0.0855, N = 1252

**GSDVIIMLVGNK pc2**

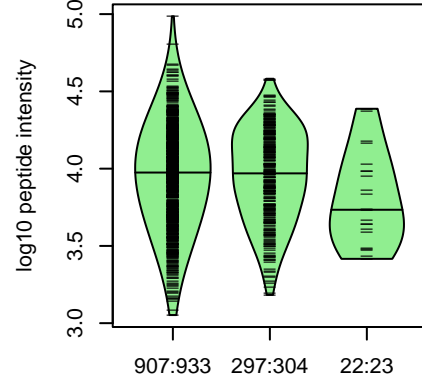

3:133607140:G:A\_A  
p = 0.21, beta = -0.0737, N = 1226

**QITIEEGEQR pc2  
Q9NRW1;Q9NRW1-2**

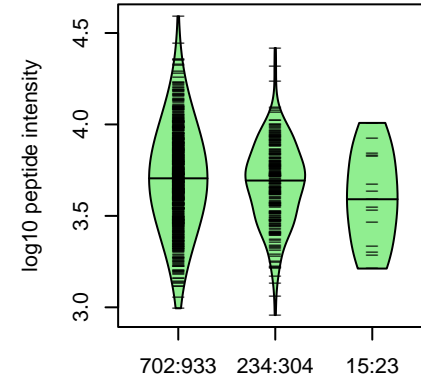

3:133607140:G:A\_A  
p = 0.032, beta = -0.144, N = 951

**LQLWDTAGQER pc2  
-4;Q14964;Q9NRW1;Q9NRW1-2;P203**

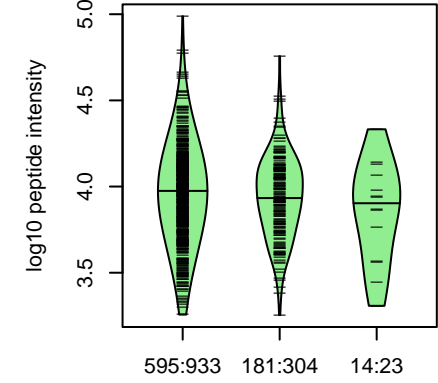

3:133607140:G:A\_A  
p = 0.27, beta = -0.0819, N = 790

**RAB6B : NP1  
Q9NRW1**

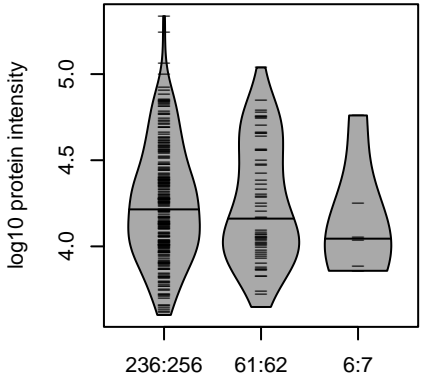

3:133607140:G:A\_A  
p = 0.73, beta = -0.0409, N = 303

**LVFLGEQSVGK pc2  
2;F5GX61;P20340-3;Q9NRW1;P20340340-4;Q9NRW1;Q9NRW1-2;P20340;P**

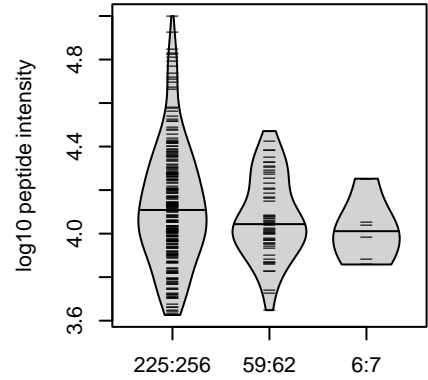

3:133607140:G:A\_A  
p = 0.13, beta = -0.185, N = 290

**GSDVIIMLVGNK pc2**

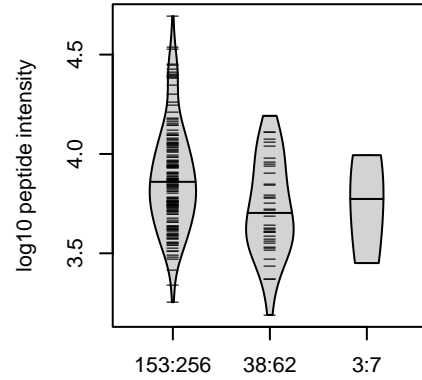

3:133607140:G:A\_A  
p = 0.0015, beta = -0.488, N = 194

**QITIEEGEQR pc2  
Q9NRW1;Q9NRW1-2**

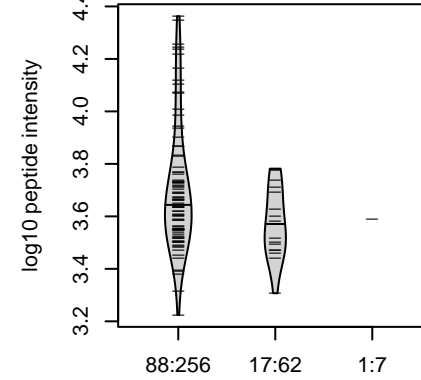

3:133607140:G:A\_A  
p = 0.026, beta = -0.511, N = 106

**LQLWDTAGQER pc2  
-4;Q14964;Q9NRW1;Q9NRW1-2;P203**

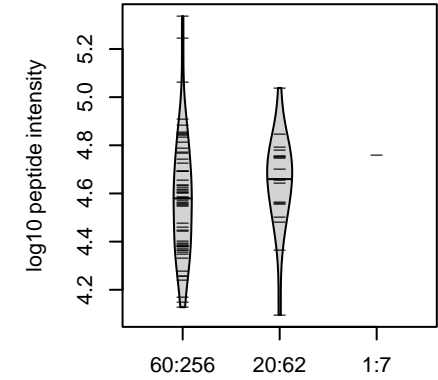

3:133607140:G:A\_A  
p = 0.24, beta = 0.268, N = 81

Assay Target: RAB6B  
Olink UniProt: Q9NRW1  
deCODE rsID: rs10212397  
Proxy rsID: rs10212397  
deCODE: 3:133888296:A:G  
Proxy SNP: 3:133607140:G:A  
deCODE log10(p): 134  
deCODE BETA: -0.26  
-:-:-:-:-\*:-:-:-:-NA  
1252:1226:951:790:705:576:563



**CCL5 : NP4  
P13501**

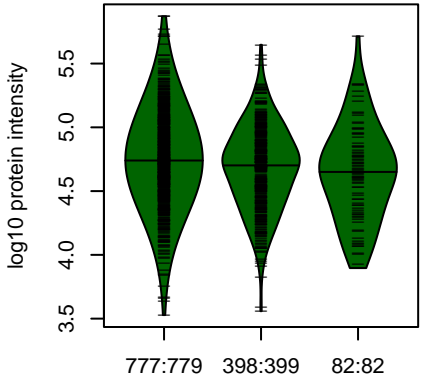

17:34163565:G:A\_A  
p = 1e-04, beta = -0.177, N = 1257

**CSNPVAVFVTR pc2  
P13501**

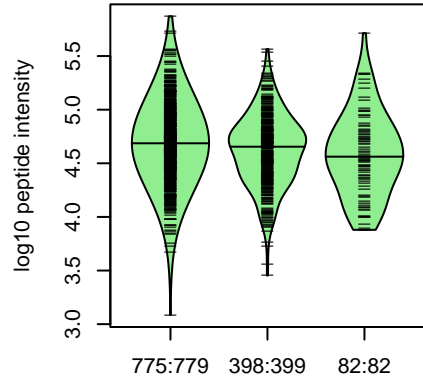

17:34163565:G:A\_A  
p = 0.00021, beta = -0.169, N = 1255

**QVCANPEK pc2  
P13501**

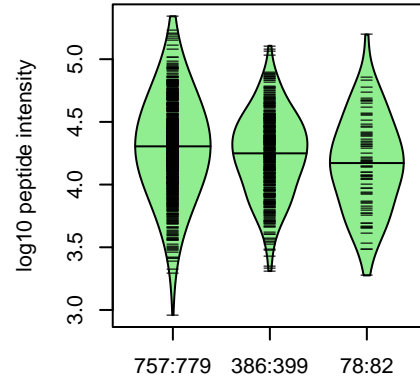

17:34163565:G:A\_A  
p = 0.00036, beta = -0.166, N = 1221

**EYFYTSQK pc2  
A0A494C1Q1;P13501**

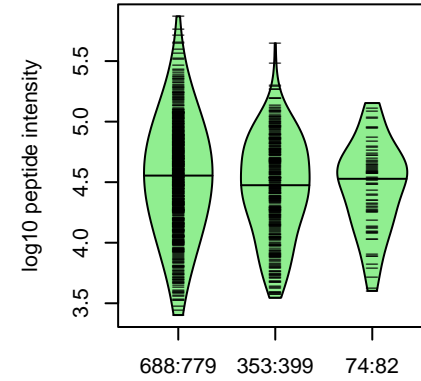

17:34163565:G:A\_A  
p = 0.0039, beta = -0.139, N = 1115

**CCL5 : NP4  
P13501**

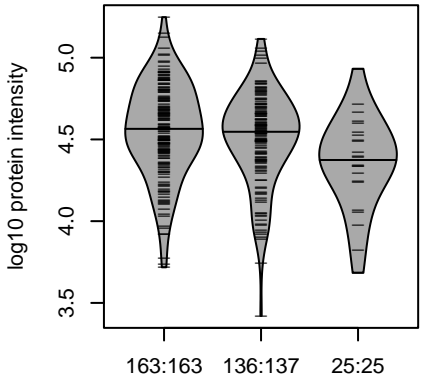

17:34163565:G:A\_A  
p = 0.0049, beta = -0.243, N = 324

**CSNPVAVFVTR pc2  
P13501**

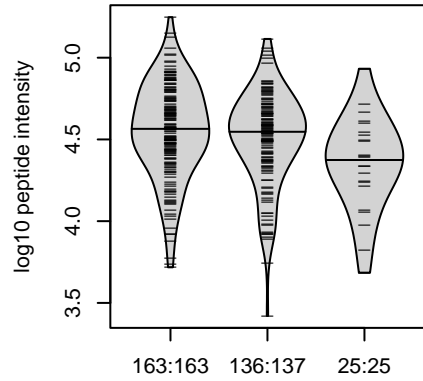

17:34163565:G:A\_A  
p = 0.0048, beta = -0.244, N = 324

**EYFYTSQK pc2  
A0A494C1Q1;P13501**

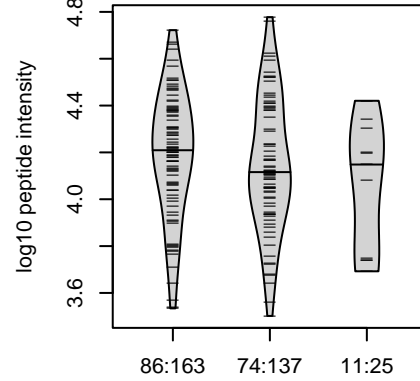

17:34163565:G:A\_A  
p = 0.082, beta = -0.212, N = 171

**QVCANPEK pc2  
P13501**

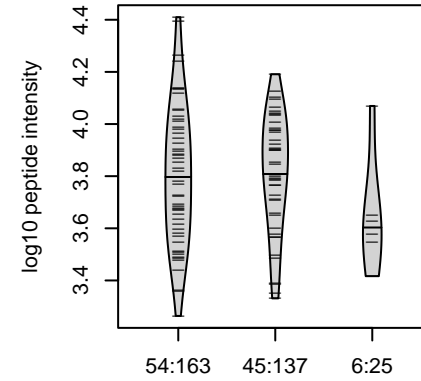

17:34163565:G:A\_A  
p = 0.45, beta = -0.119, N = 105

Assay Target: CCL5  
Olink UniProt: P13501  
deCODE rsID: rs4239252  
Proxy rsID: rs4239252  
deCODE: 17:35836561:A:G  
Proxy SNP: 17:34163565:G:A  
deCODE log10(p): 132  
deCODE BETA: -0.26  
\*\*\*  
1255:1221:1115

**RNASE1 : NP4  
P07998**

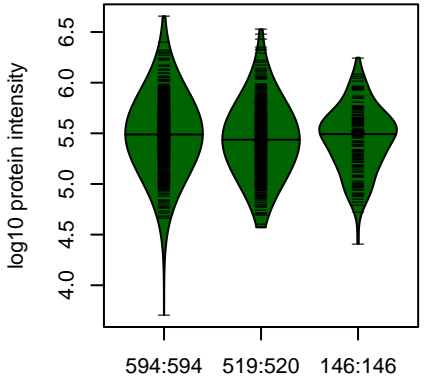

14:21283042:C:T\_C  
p = 0.0017, beta = -0.129, N = 1259

**SNSSMHITDCR pc2  
G3V357;P07998**

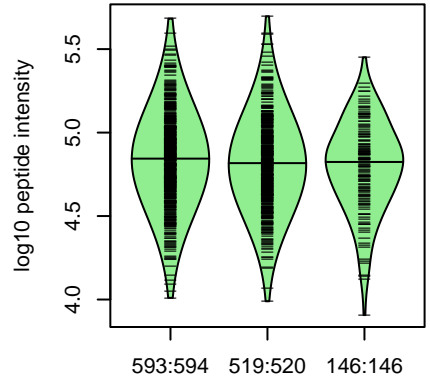

14:21283042:C:T\_C  
p = 0.028, beta = -0.0907, N = 1258

**NGQGNCYK pc2  
G3V357;P07998**

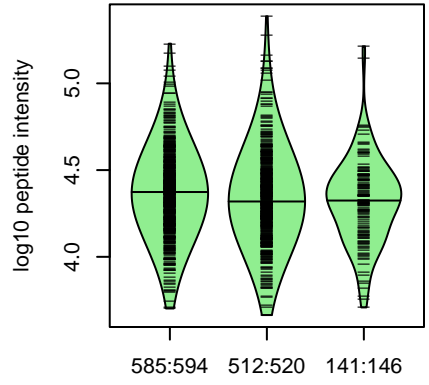

14:21283042:C:T\_C  
p = 0.0014, beta = -0.133, N = 1238

**QHMDSDSSPSSSSTYCNQMMR pc  
P07998**

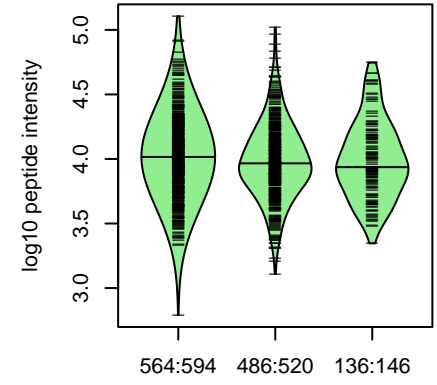

14:21283042:C:T\_C  
p = 0.0092, beta = -0.111, N = 1186

**HIIVACEGSPYVPVHFDASVEDST pc  
G3V357;P07998**

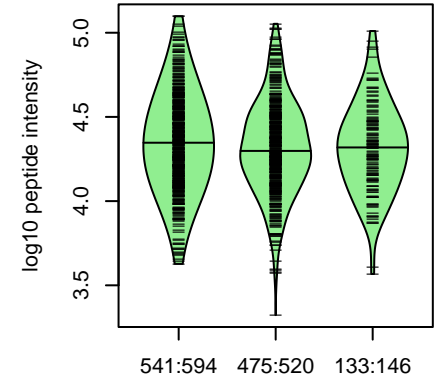

14:21283042:C:T\_C  
p = 0.018, beta = -0.102, N = 1149

**RNASE1 : NP4  
P07998**

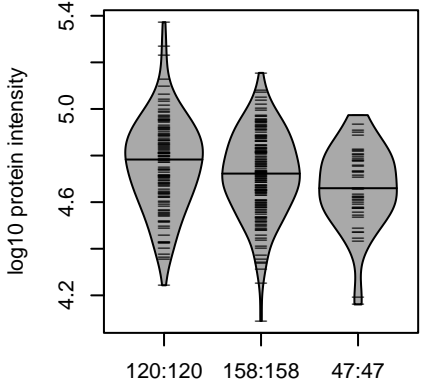

14:21283042:C:T\_C  
p = 0.0082, beta = -0.212, N = 325

**CKPVNTFVHEPLVDVQNVCFQEK pc  
G3V357;P07998**

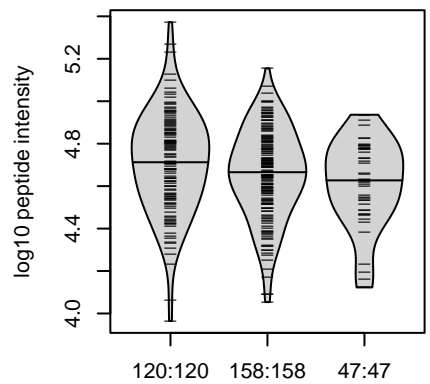

14:21283042:C:T\_C  
p = 0.013, beta = -0.2, N = 325

**SNSSMHITDCR pc3  
G3V357;P07998**

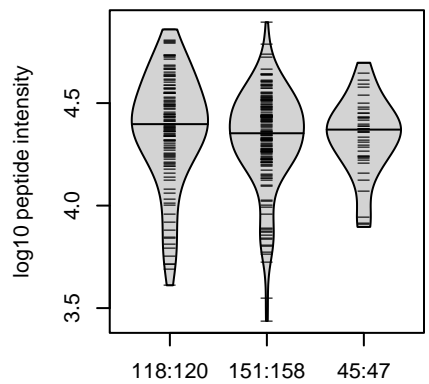

14:21283042:C:T\_C  
p = 0.021, beta = -0.188, N = 314

**NGQGNCYK pc2  
G3V357;P07998**

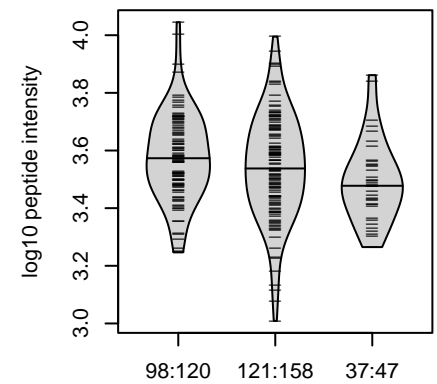

14:21283042:C:T\_C  
p = 0.013, beta = -0.222, N = 256

**YPNCAYR pc2  
G3V357;P07998**

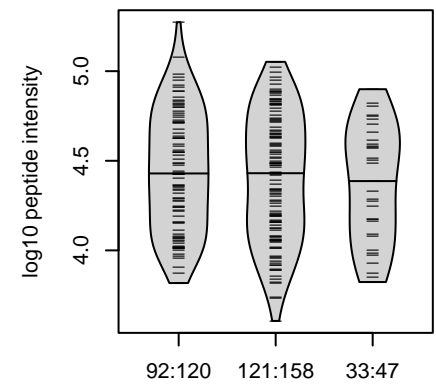

14:21283042:C:T\_C  
p = 0.33, beta = -0.0914, N = 246

Assay Target: RNASE1  
Olink UniProt: P07998  
deCODE rsID: rs12897030  
Proxy rsID: rs12897030  
deCODE: 14:20814883:C:T  
Proxy SNP: 14:21283042:C:T  
deCODE log10(p): 130.1  
deCODE BETA: -0.22  
-:-\*:\*:-:-:-:-:-  
1258:1256:1238:1186:1149:114





**DTD1 : NP3  
Q8TEA8**

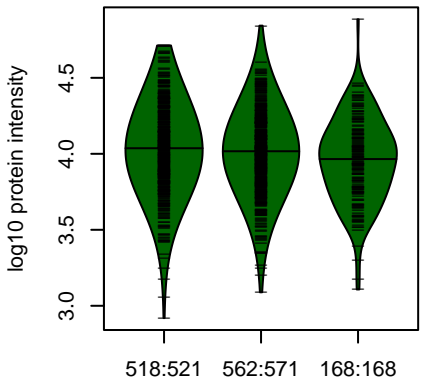

20:18576176:A:G\_G  
p = 8e-04, beta = -0.137, N = 1248

**ASVTVGGEQISAIGR pc2  
A0A2R8Y6X2;A0A2R8YCT7;Q8TEA**

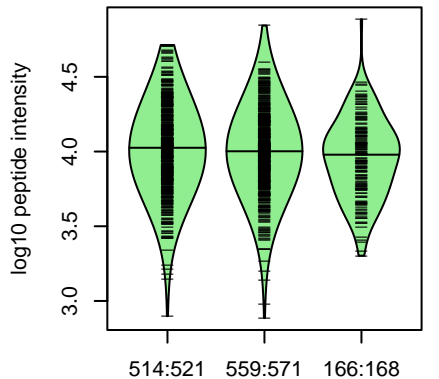

20:18576176:A:G\_G  
p = 0.0039, beta = -0.119, N = 1239

**VFEDESGK pc2  
A0A2R8Y6X2;A0A2R8YCT7;Q8TEA**

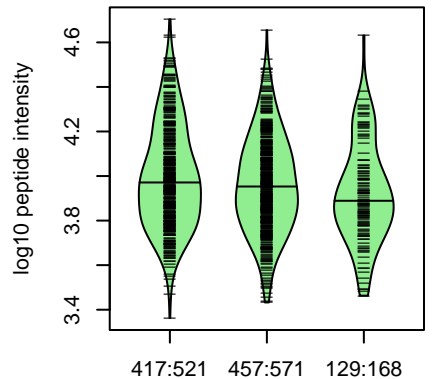

20:18576176:A:G\_G  
p = 0.00024, beta = -0.169, N = 1003

**TYRPELIK pc2  
A0A2R8Y6X2;A0A2R8YCT7;Q8TEA**

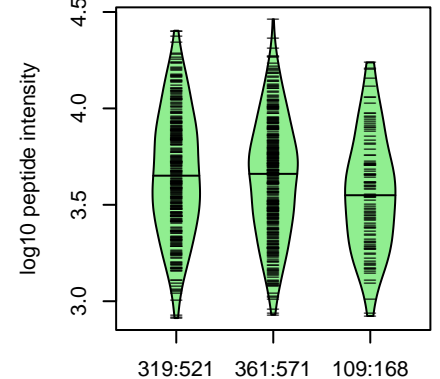

20:18576176:A:G\_G  
p = 0.0025, beta = -0.156, N = 789

**SASSGAEGDVSSEREP pc2  
Q8TEA8**

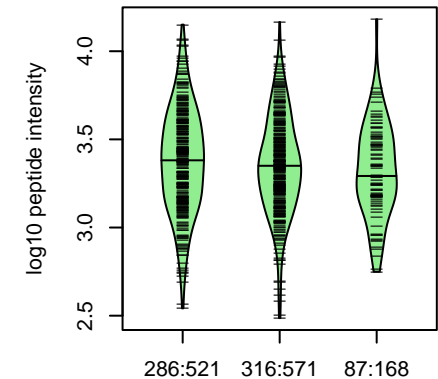

20:18576176:A:G\_G  
p = 0.099, beta = -0.0922, N = 689

**DTD1 : NP3  
Q8TEA8**

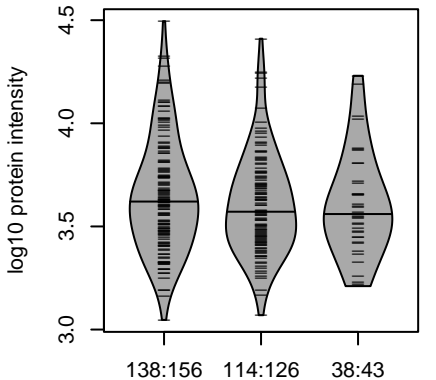

20:18576176:A:G\_G  
p = 0.5, beta = -0.0559, N = 290

**ASVTVGGEQISAIGR pc2  
A0A2R8Y6X2;A0A2R8YCT7;Q8TEA**

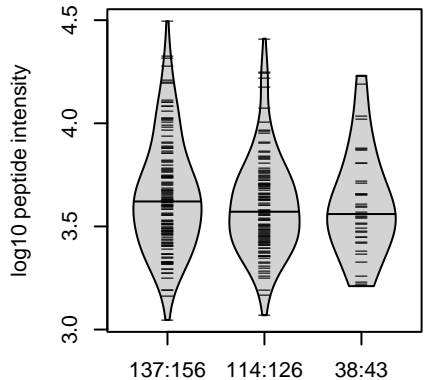

20:18576176:A:G\_G  
p = 0.44, beta = -0.064, N = 289

**QYEILCVSQFTLQCVLK pc3  
A0A2R8Y6X2;A0A2R8YCT7;Q8TEA**

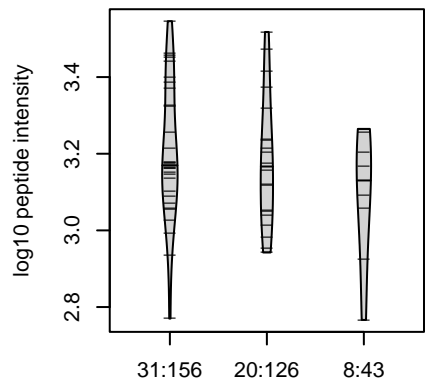

20:18576176:A:G\_G  
p = 0.16, beta = -0.245, N = 59

**TYRPELIK pc2  
A0A2R8Y6X2;A0A2R8YCT7;Q8TEA**

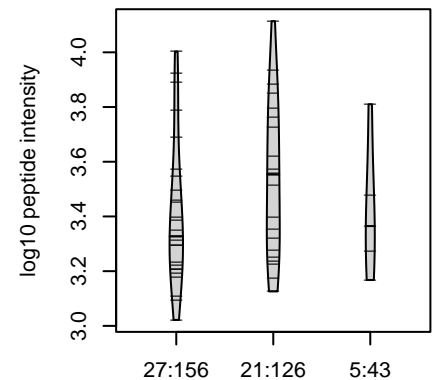

20:18576176:A:G\_G  
p = 0.35, beta = 0.186, N = 53

**SASSGAEGDVSSEREP pc2  
Q8TEA8**

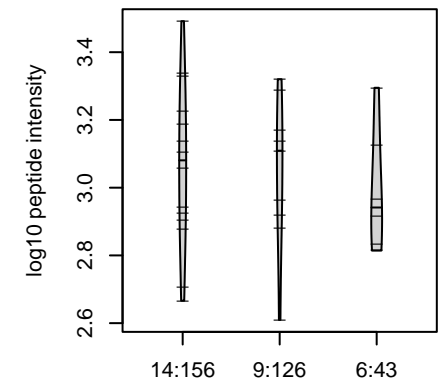

20:18576176:A:G\_G  
p = 0.5, beta = -0.15, N = 29

Assay Target: DTD1  
Olink UniProt: Q8TEA8  
deCODE rsID: rs6081231  
Proxy rsID: rs6081235  
deCODE: 20:18590320:A:G  
Proxy SNP: 20:18576176:A:G  
deCODE log10(p): 127.8  
deCODE BETA: -0.2  
\*.\*.\*.-.\*.-.-  
1239:1003:789:689:604:456:254

**C1QTNF9 : NP4  
P0C862**

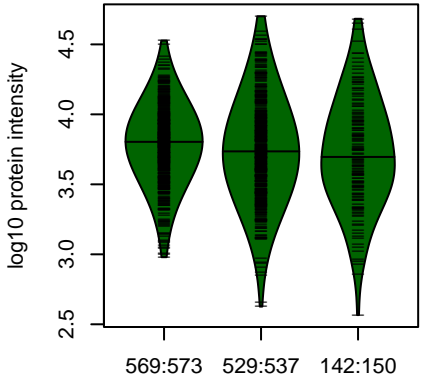

13:24933626:C:T\_T  
p = 0.042, beta = -0.0853, N = 1240

**IGETLVLPK pc2  
B2RNN3;P0C862**

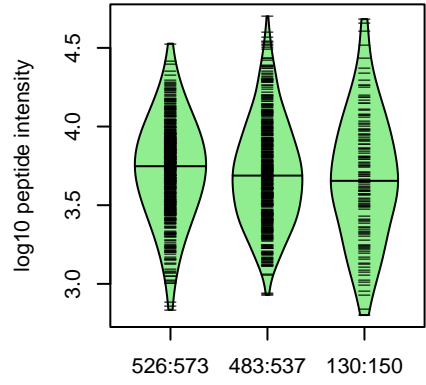

13:24933626:C:T\_T  
p = 0.21, beta = -0.0542, N = 1139

**SAFTVGLTVLSK pc2  
B2RNN3;P0C862**

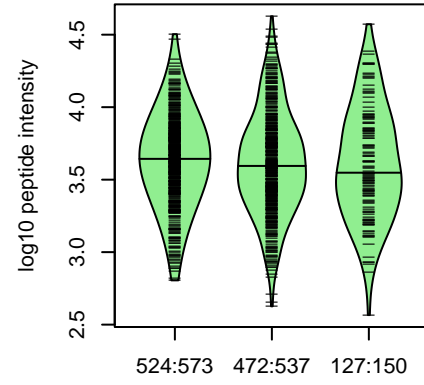

13:24933626:C:T\_T  
p = 0.53, beta = -0.0274, N = 1123

**ILYNEFNHYDTAAGK pc3  
P0C862**

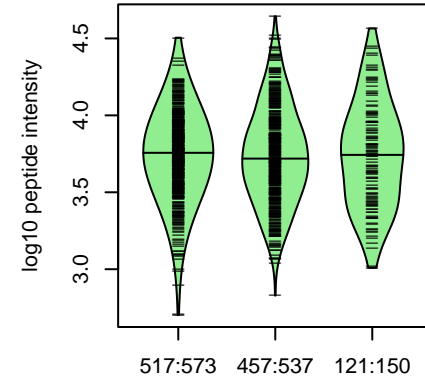

13:24933626:C:T\_T  
p = 0.84, beta = 0.00919, N = 1095

**LGDEVWLQVTGGER pc2  
P0C862**

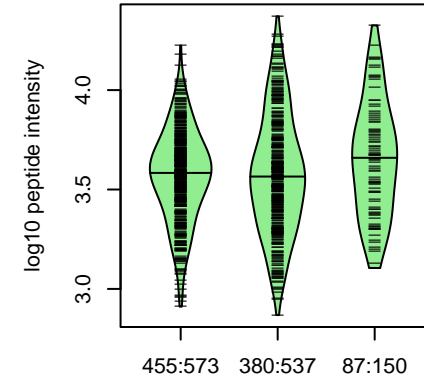

13:24933626:C:T\_T  
p = 0.024, beta = 0.112, N = 922

**C1QTNF9 : NP4  
P0C862**

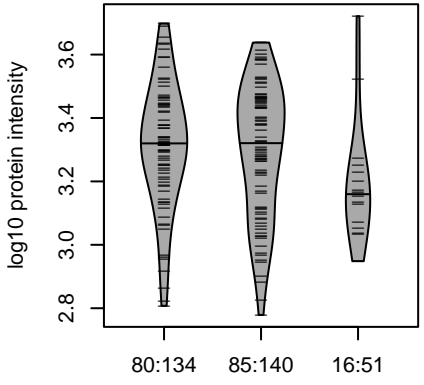

13:24933626:C:T\_T  
p = 0.24, beta = -0.134, N = 181

**ILYNEFNHYDTAAGK pc3  
P0C862**

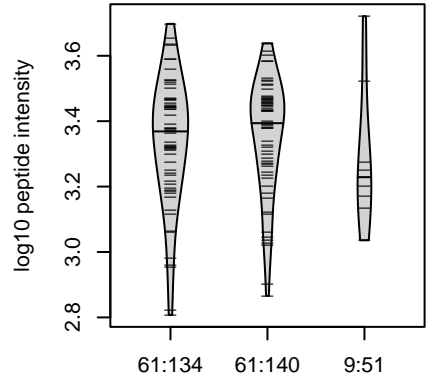

13:24933626:C:T\_T  
p = 0.6, beta = 0.0719, N = 131

**IGETLVLPK pc2  
B2RNN3;P0C862**

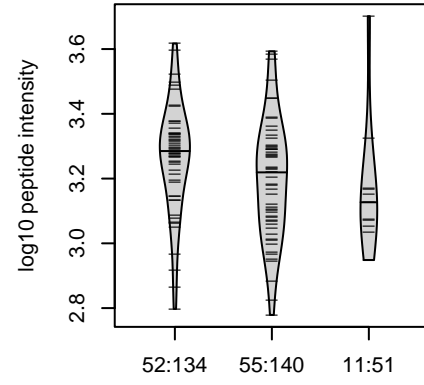

13:24933626:C:T\_T  
p = 0.06, beta = -0.261, N = 118

Assay Target: C1QTNF9  
Olink UniProt: P0C862  
deCODE rsID: rs11840418  
Proxy rsID: rs11840418  
deCODE: 13:24359488:T:C  
Proxy SNP: 13:24933626:C:T  
deCODE log10(p): 127.5  
deCODE BETA: -0.21  
-:-:-:-:NA  
1139:1123:1095:922:3

**FPSSDMPK pc2  
rs3751357 REF**

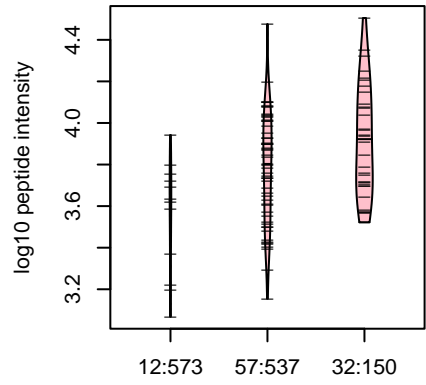

13:24933626:C:T\_T  
p = 7.3e-14, model = REC, N = 101

**FPSSDVPIK pc2  
rs3751357 ALT**

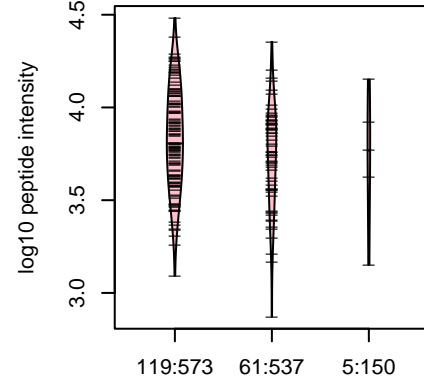

13:24933626:C:T\_T  
p = 2.7e-08, model = REC, N = 185

**QPCT : NP5  
Q16769**

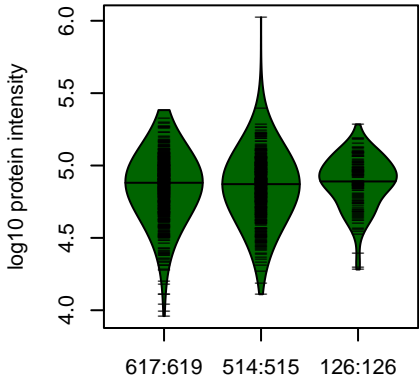

2:37590284:G:A\_A  
p = 0.18, beta = 0.0567, N = 1257

**SFSNIISTLNPTAK pc2  
Q16769**

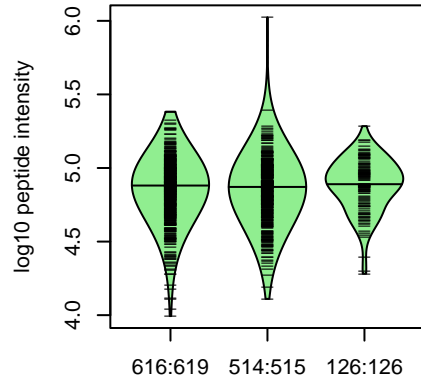

2:37590284:G:A\_A  
p = 0.2, beta = 0.0547, N = 1256

**MASTPHPPGAR pc2  
Q16769**

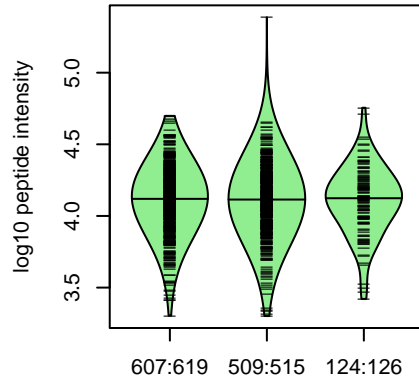

2:37590284:G:A\_A  
p = 0.97, beta = -0.00152, N = 1240

**YPGSPGSYAAR pc2  
Q16769**

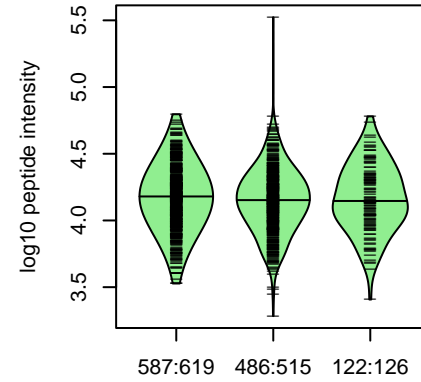

2:37590284:G:A\_A  
p = 0.71, beta = -0.0164, N = 1195

**DHSLEGR pc2  
Q16769**

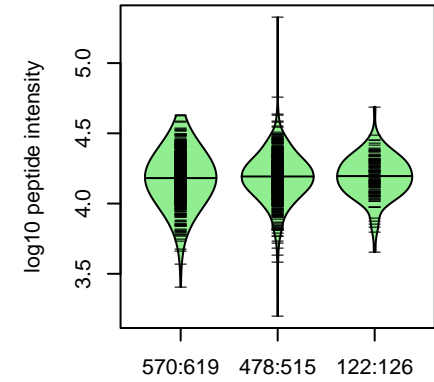

2:37590284:G:A\_A  
p = 0.24, beta = 0.0512, N = 1170

**QPCT : NP5  
Q16769**

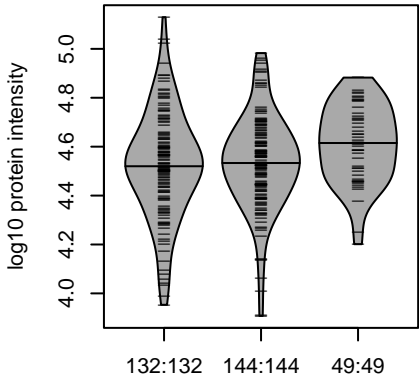

2:37590284:G:A\_A  
p = 0.077, beta = 0.138, N = 325

**SFSNIISTLNPTAK pc2  
Q16769**

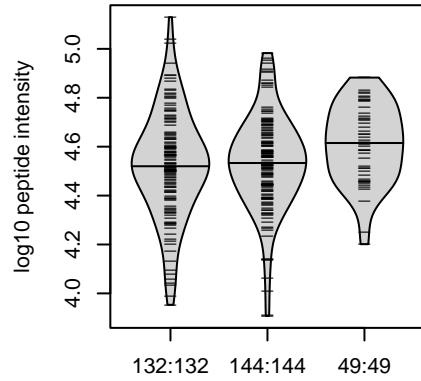

2:37590284:G:A\_A  
p = 0.077, beta = 0.138, N = 325

**YPGSPGSYAAR pc2  
Q16769**

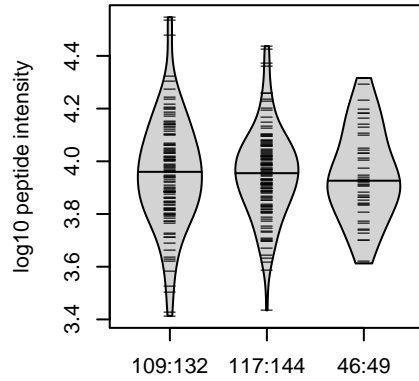

2:37590284:G:A\_A  
p = 0.66, beta = -0.0363, N = 272

**MASTPHPPGAR pc2  
Q16769**

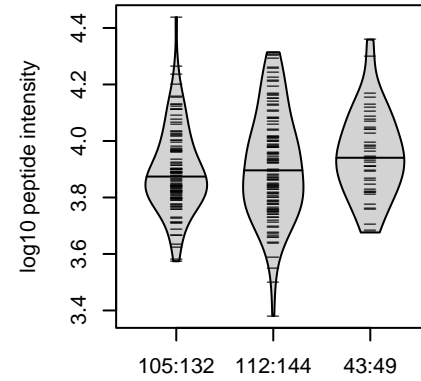

2:37590284:G:A\_A  
p = 0.29, beta = 0.0912, N = 260

**DHSLEGR pc2  
Q16769**

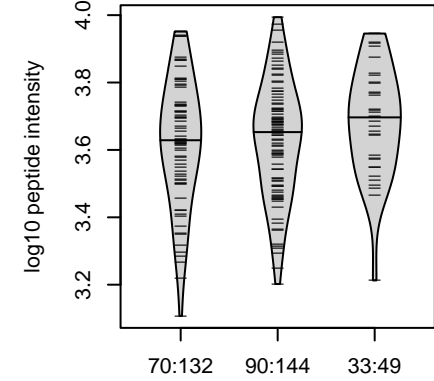

2:37590284:G:A\_A  
p = 0.27, beta = 0.11, N = 193

Assay Target: QPCT  
Olink UniProt: Q16769  
deCODE rsID: rs4384764  
Proxy rsID: rs4384764  
deCODE: 2:37363141:A:G  
Proxy SNP: 2:37590284:G:A  
deCODE log10(p): 126.5  
deCODE BETA: 0.22  
-----  
1256:1240:1195:1170:1112:973

**PRSS2 : NP2**  
A0A0J9YYC8;A6XMV9;P07478

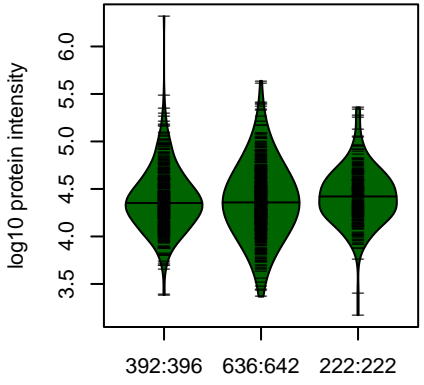

7:142498523:T:C\_C  
p = 0.15, beta = 0.0594, N = 1250

**LSSPAVINSR pc2**  
A0A0J9YYC8;A6XMV9;P07478

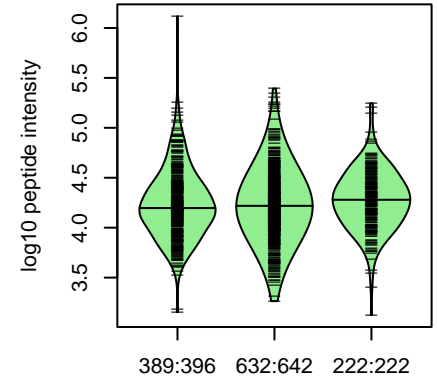

7:142498523:T:C\_C  
p = 0.11, beta = 0.0651, N = 1243

**TLDNDILLIK pc2**  
A0A0J9YYC8;A6XMV9;P07478

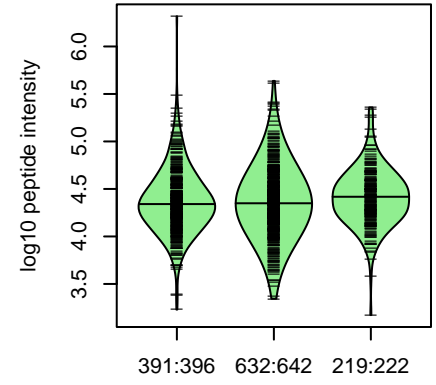

7:142498523:T:C\_C  
p = 0.12, beta = 0.0646, N = 1242

**VYNYVDWIK pc2**  
'P0MNE9;A0A7P0MP65;A6XMV9;P35CYC8;A6XMV9;E7EQ64;P07477;P07478

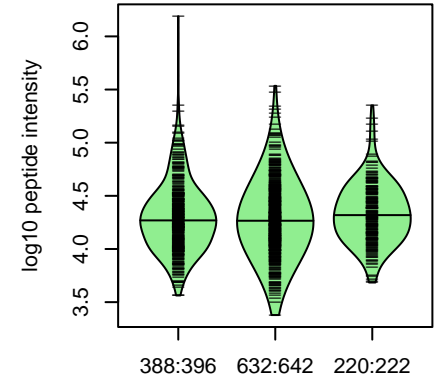

7:142498523:T:C\_C  
p = 0.13, beta = 0.0628, N = 1240

**LGEHNIEVLEGNEQFINAAK pc3**  
7:142498523:T:C\_C

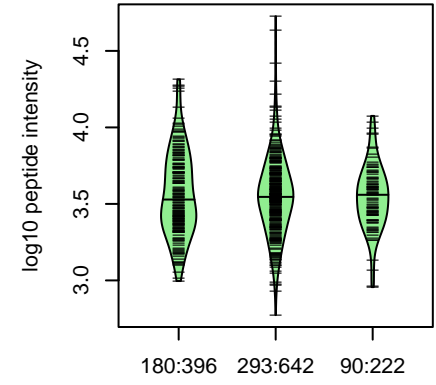

7:142498523:T:C\_C  
p = 0.6, beta = -0.0321, N = 563

**PRSS2 : NP2**  
A0A0J9YYC8;A6XMV9;P07478

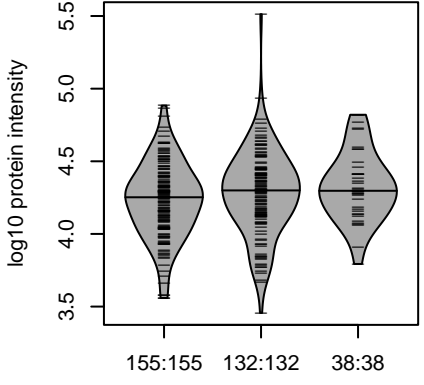

7:142498523:T:C\_C  
p = 0.022, beta = 0.184, N = 325

**LSSPAVINSR pc2**  
A0A0J9YYC8;A6XMV9;P07478

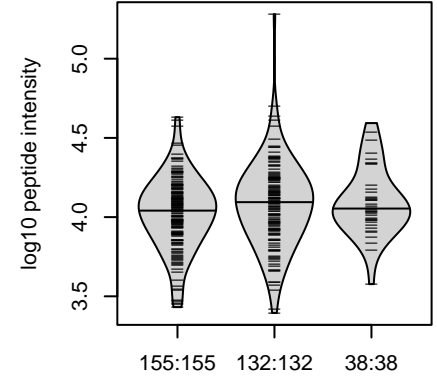

7:142498523:T:C\_C  
p = 0.0079, beta = 0.212, N = 325

**TLDNDILLIK pc2**  
A0A0J9YYC8;A6XMV9;P07478

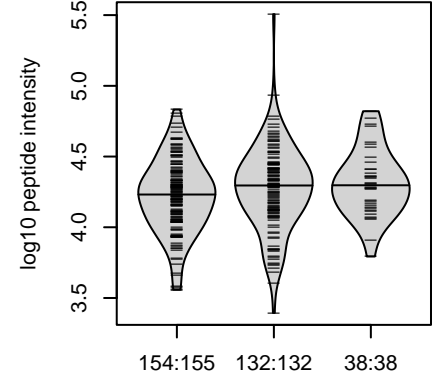

7:142498523:T:C\_C  
p = 0.02, beta = 0.186, N = 324

**VYNYVDWIK pc2**  
'P0MNE9;A0A7P0MP65;A6XMV9;P35CYC8;A6XMV9;E7EQ64;P07477;P07478

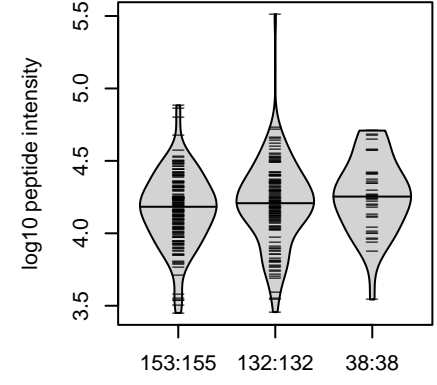

7:142498523:T:C\_C  
p = 0.03, beta = 0.175, N = 323

**LGEHNIEVLEGNEQFINAAK pc3**  
7:142498523:T:C\_C

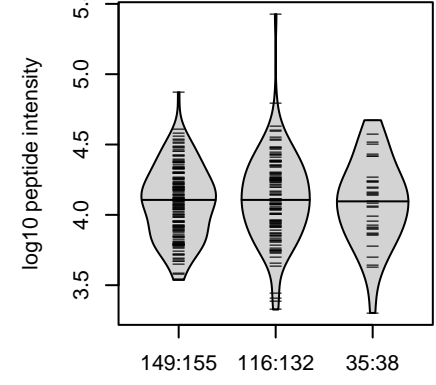

7:142498523:T:C\_C  
p = 0.5, beta = 0.0564, N = 300

Assay Target: PRSS2  
Olink UniProt: P07478  
deCODE rsID: rs1799886  
Proxy rsID: rs1799886  
deCODE: 7:142800839:C:T  
Proxy SNP: 7:142498523:T:C  
deCODE log10(p): 123.9  
deCODE BETA: 0.2  
-:-:-:-  
1243:1242:1240:563:425



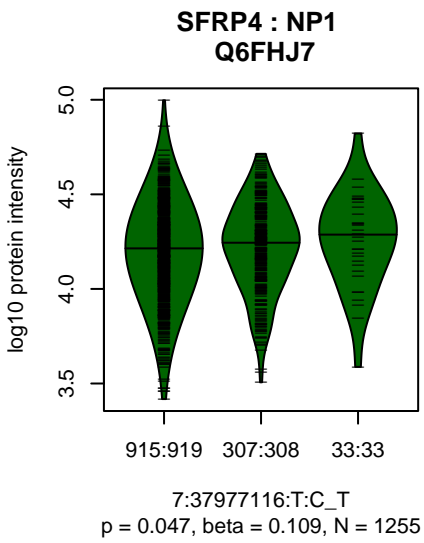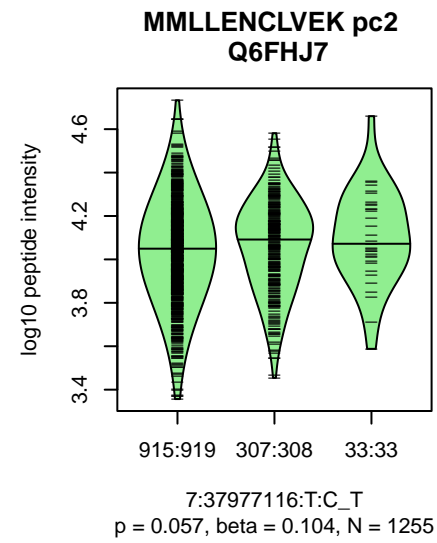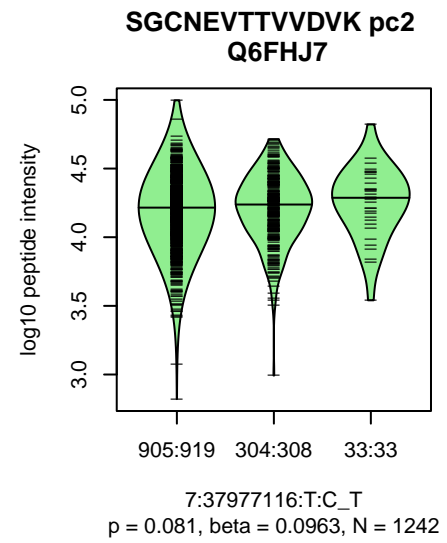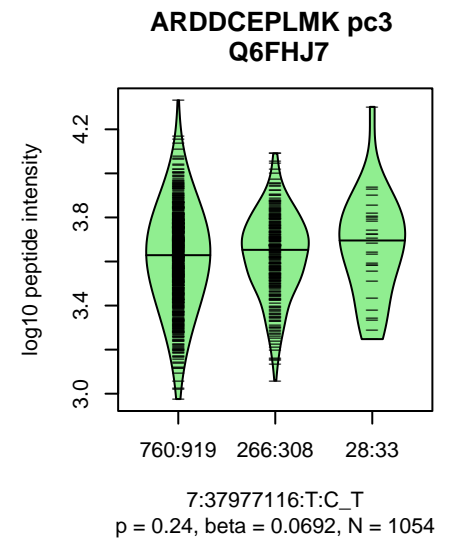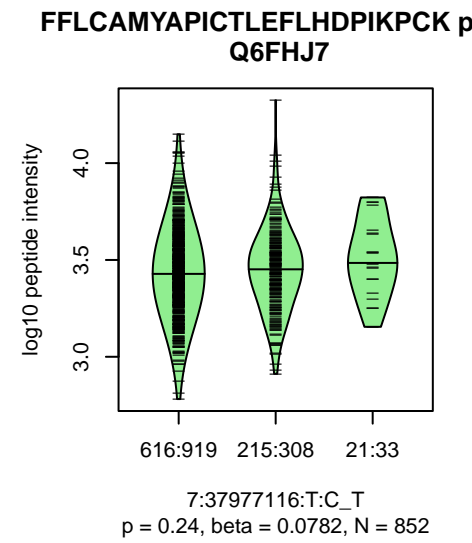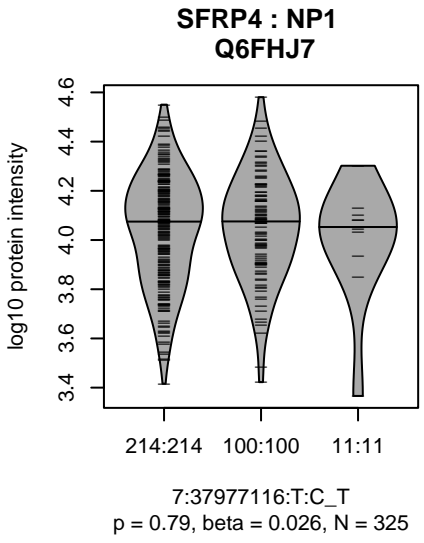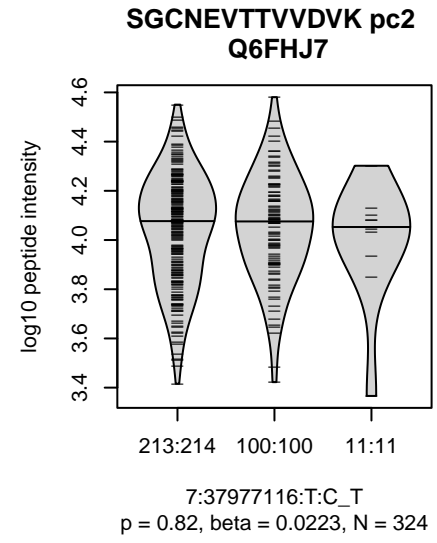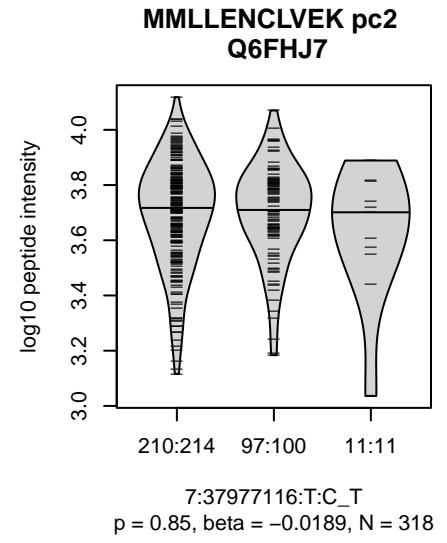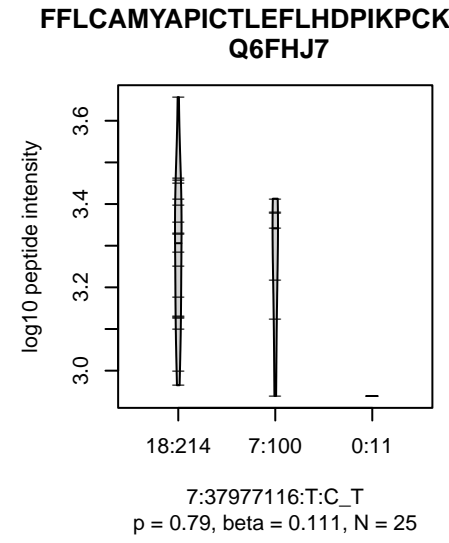

Assay Target: SFRP4  
 Olink UniProt: Q6FHJ7  
 deCODE rsID: rs2598105  
 Proxy rsID: rs2598105  
 deCODE: 7:37937514:T:C  
 Proxy SNP: 7:37977116:T:C  
 deCODE log10(p): 122.9  
 deCODE BETA: 0.27  
 -: -: -: -: -: NA  
 1255:1242:1054:852:662:103:17





**GRN : NP4  
P28799**

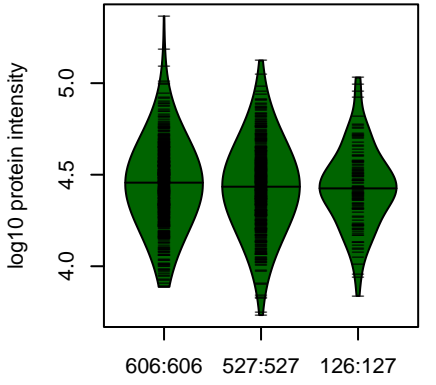

17:42430244:C:T\_T  
p = 0.27, beta = -0.0473, N = 1259

**HCCPAGFR pc2  
K7EQ05;P28799;P28799-2**

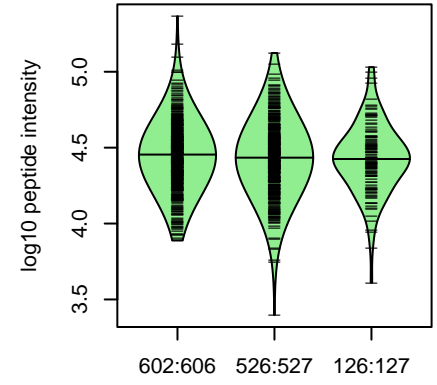

17:42430244:C:T\_T  
p = 0.21, beta = -0.0535, N = 1254

**QGWACCPYR pc2  
K7EQ05;P28799;P28799-2**

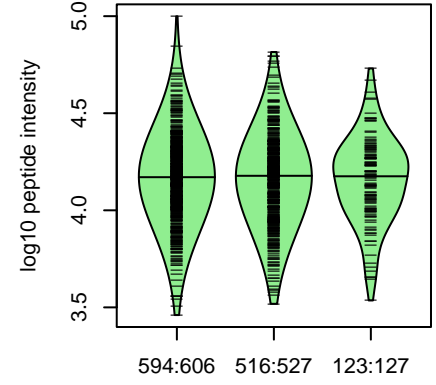

17:42430244:C:T\_T  
p = 0.48, beta = -0.0302, N = 1233

**QGVCCADR pc2  
K7EQ05;P28799;P28799-2**

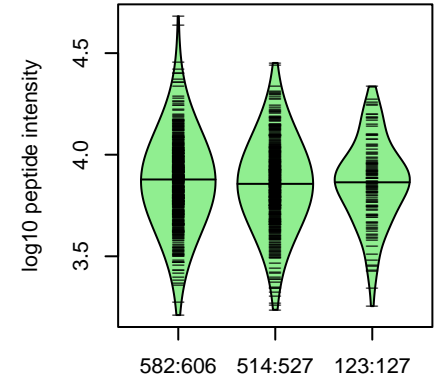

17:42430244:C:T\_T  
p = 0.37, beta = -0.0389, N = 1219

**VHCCPHGAFCDLVHTR pc4  
P28799;P28799-2**

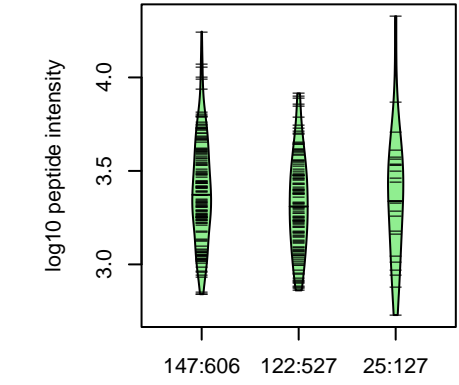

17:42430244:C:T\_T  
p = 0.14, beta = -0.131, N = 294

**GRN : NP4  
P28799;P28799-2**

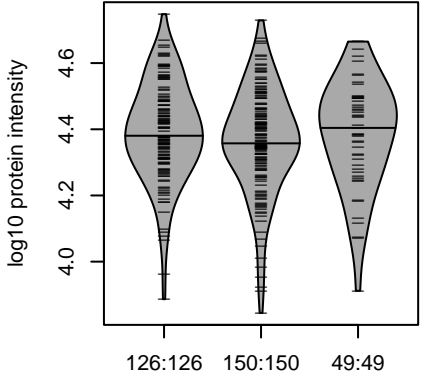

17:42430244:C:T\_T  
p = 0.26, beta = -0.0887, N = 325

**QGWACCPYR pc2  
K7EQ05;P28799;P28799-2**

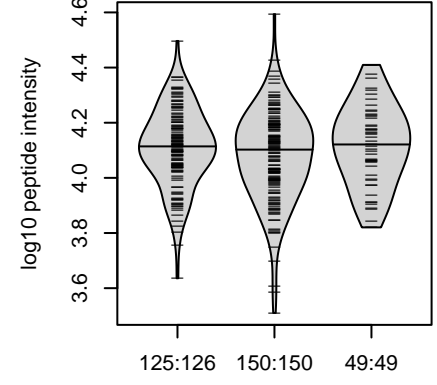

17:42430244:C:T\_T  
p = 0.42, beta = -0.0631, N = 324

**HCCPAGFR pc2  
K7EQ05;P28799;P28799-2**

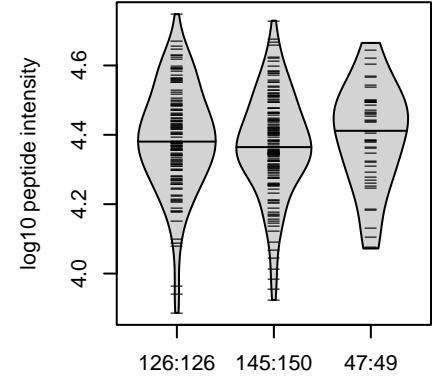

17:42430244:C:T\_T  
p = 0.59, beta = -0.0429, N = 318

**QGVCCADR pc2  
K7EQ05;P28799;P28799-2**

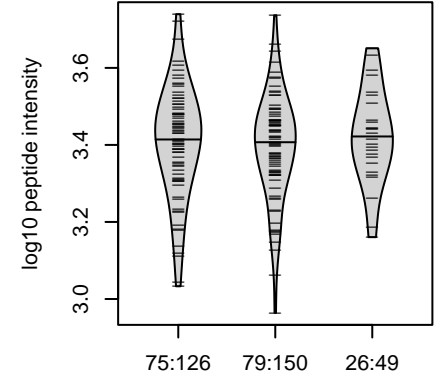

17:42430244:C:T\_T  
p = 0.94, beta = -0.0074, N = 180

Assay Target: GRN  
Olink UniProt: P28799  
deCODE rsID: rs5848  
Proxy rsID: rs5848  
deCODE: 17:44352876:T:C  
Proxy SNP: 17:42430244:C:T  
deCODE log10(p): 118.7  
deCODE BETA: -0.22  
-:-:-:-:-NA  
1254:1233:1219:294:280:58:16

**MAN1C1 : NP2**  
**Q9NR34**

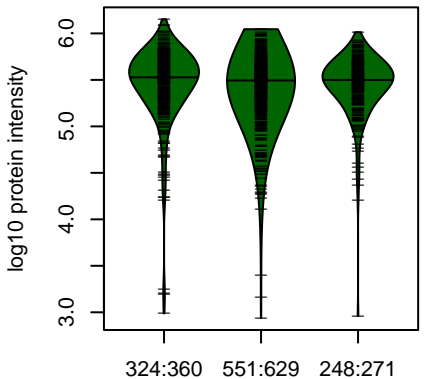

1:26008659:T:C\_C  
p = 0.11, beta = -0.0663, N = 1123

**ELAAQITK pc2**  
**A0A087WZ31;A6NGN6;B1AJZ5;Q9N**

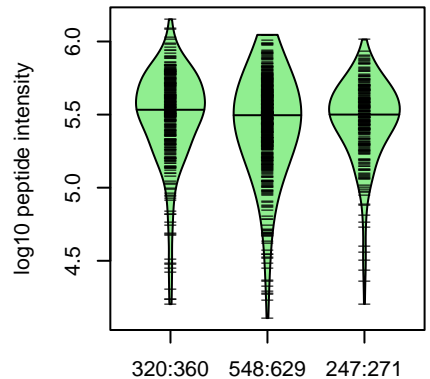

1:26008659:T:C\_C  
p = 0.073, beta = -0.0754, N = 1115

**TQQPGLVVAEIAGHAPAR pc3**  
**Q9NR34**

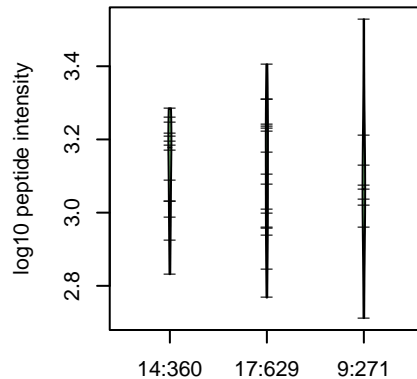

1:26008659:T:C\_C  
p = 0.63, beta = -0.0978, N = 40

**LLPAFNTPTGIPK pc2**  
**A0A087WZ31;A6NGN6;B1AJZ5;Q9N**

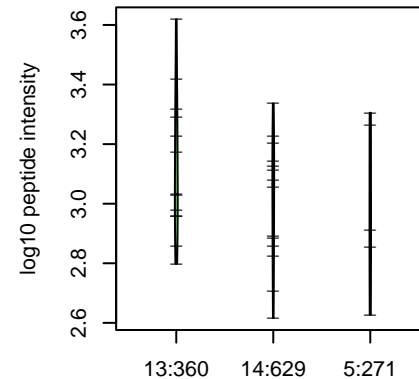

1:26008659:T:C\_C  
p = 0.28, beta = -0.25, N = 32

**MAN1C1 : NP2**  
**A6NGN6;B1AJZ5;Q9NR34**

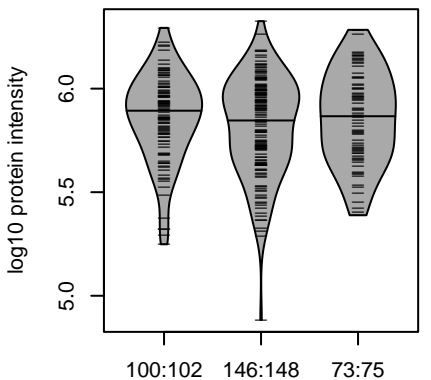

1:26008659:T:C\_C  
p = 0.43, beta = 0.0602, N = 319

**ELAAQITK pc2**  
**A0A087WZ31;A6NGN6;B1AJZ5;Q9N**

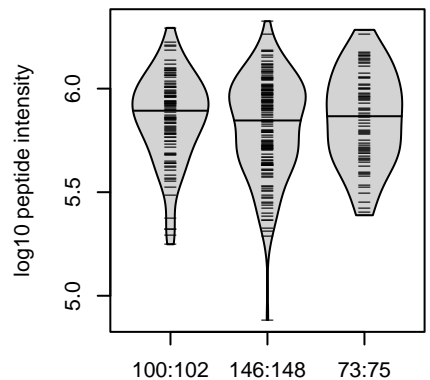

1:26008659:T:C\_C  
p = 0.43, beta = 0.0602, N = 319

Assay Target: MAN1C1  
Olink UniProt: Q9NR34  
deCODE rsID: rs11247595  
Proxy rsID: rs11247595  
deCODE 1:25682168:T:C  
Proxy SNP: 1:26008659:T:C  
deCODE log10(p): 116.6  
deCODE BETA: 0.19  
-:-:-  
1115:40:32

**SPOCK2 : NP2**  
**Q92563**

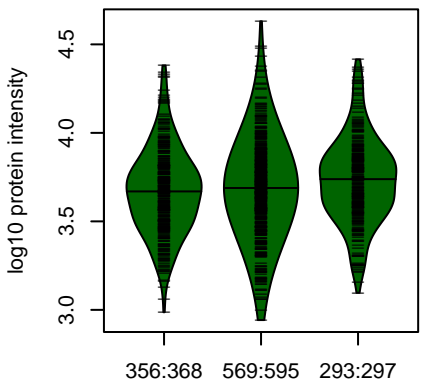

10:73845884:G:A\_A  
p = 0.028, beta = 0.0858, N = 1218

**LEQQACLSSK pc2**  
**Q92563**

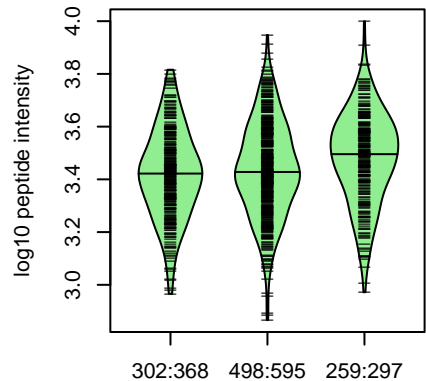

10:73845884:G:A\_A  
p = 0.0032, beta = 0.124, N = 1059

**DSIGWMFSK pc2**  
**Q92563**

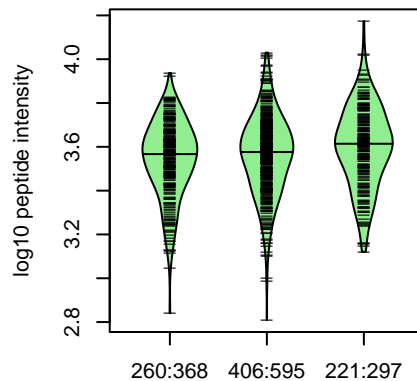

10:73845884:G:A\_A  
p = 0.01, beta = 0.116, N = 887

**VCI AQGYQR pc2**  
**Q92563**

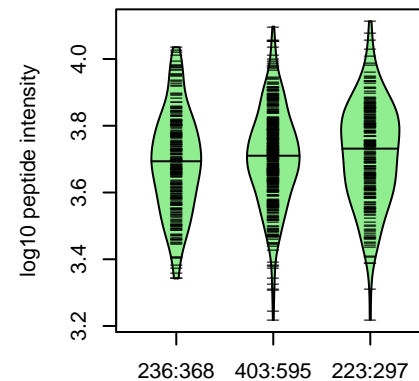

10:73845884:G:A\_A  
p = 0.46, beta = 0.0345, N = 862

**PCHMAQLASVCGSDGHTYSSVCK p**  
**Q92563**

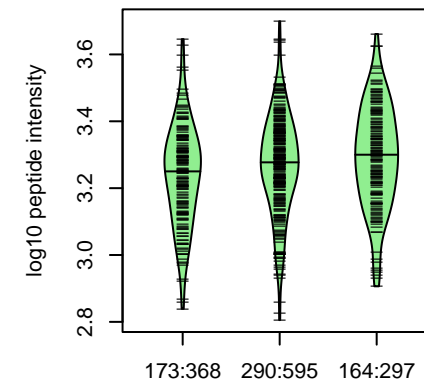

10:73845884:G:A\_A  
p = 0.0055, beta = 0.15, N = 627

**SPOCK2 : NP2**  
**Q92563**

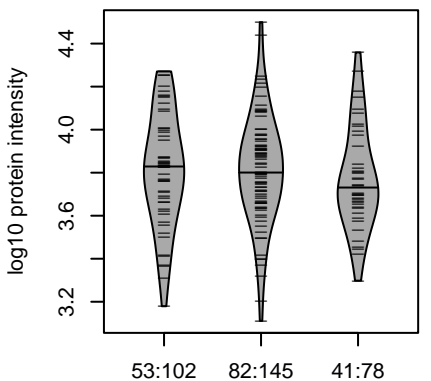

10:73845884:G:A\_G  
p = 0.42, beta = -0.0823, N = 176

**DSIGWMFSK pc2**  
**Q92563**

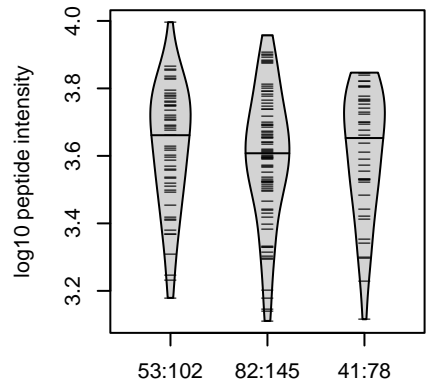

10:73845884:G:A\_G  
p = 0.7, beta = -0.0398, N = 176

Assay Target: SPOCK2  
Olink UniProt: Q92563  
deCODE rsID: rs1245548  
Proxy rsID: rs1245548  
deCODE: 10:72086126:A:G  
Proxy SNP: 10:73845884:G:A  
deCODE log10(p): 116  
deCODE BETA: 0.19  
\*.-:.-.\*.-:  
1059:887:862:627:541:243

**S100A12 : NP5  
P80511**

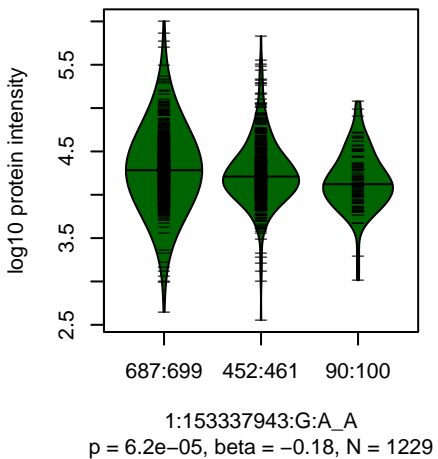

**GHFDTLSK pc2  
P80511**

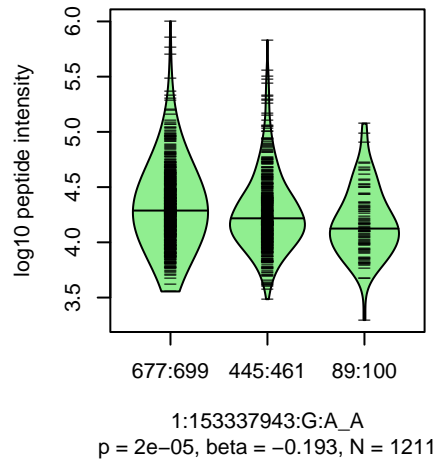

**TKLEEHLEGIVNIFHQYSVR pc4  
P80511**

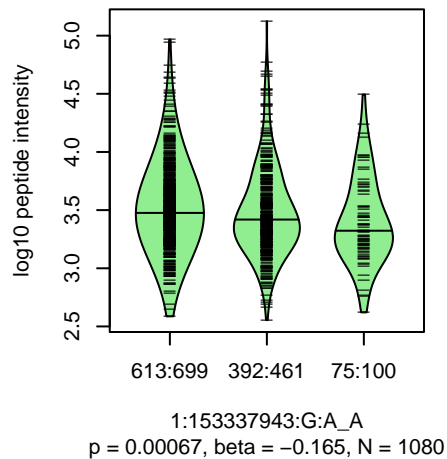

**LEEHLLEGIVNIFHQYSVRK pc4  
P80511**

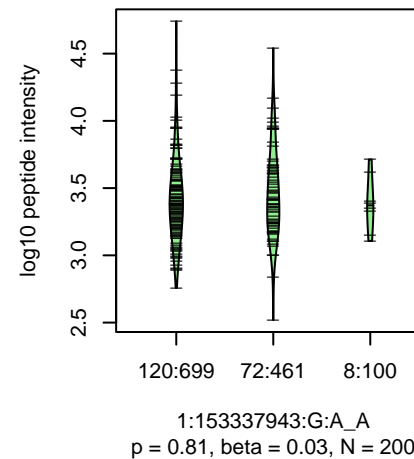

**LEEHLLEGIVNIFHQYSVR pc4  
P80511**

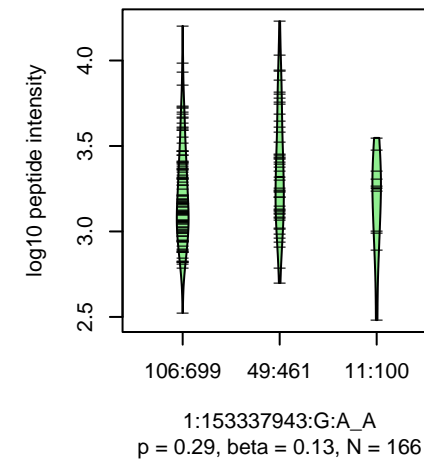

**S100A12 : NP5  
P80511**

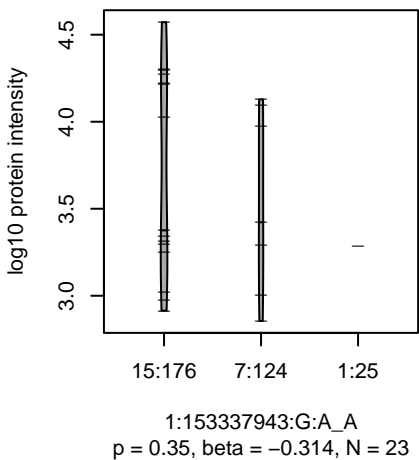

Assay Target: S100A12  
 Olink UniProt: P80511  
 deCODE rsID: rs3014874  
 Proxy rsID: rs3014874  
 deCODE: 1:153365467:A:G  
 Proxy SNP: 1:153337943:G:A  
 deCODE log10(p): 114.8  
 deCODE BETA: -0.22  
 \*.-:-:-  
 1211:1080:200:166:55:39

**MAN1A2 : NP5  
O60476**

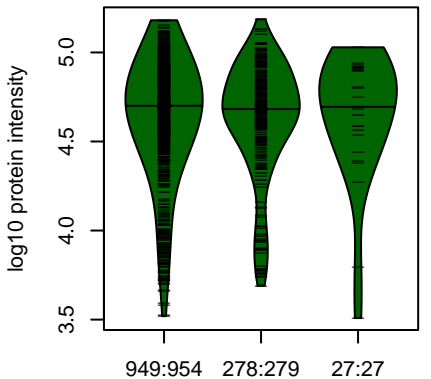

1:117854911:C:T\_T  
p = 0.62, beta = -0.0285, N = 1254

**RFDLGLDVLIPHVDAGK pc3  
O60476**

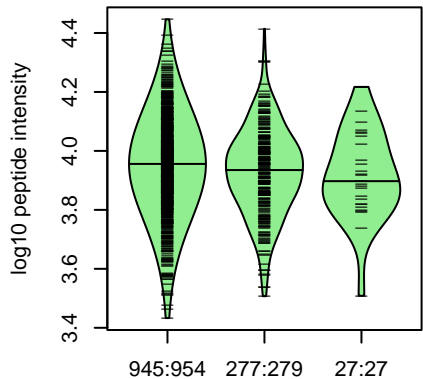

1:117854911:C:T\_T  
p = 0.042, beta = -0.117, N = 1249

**FDGAVEAVVR pc2  
O60476**

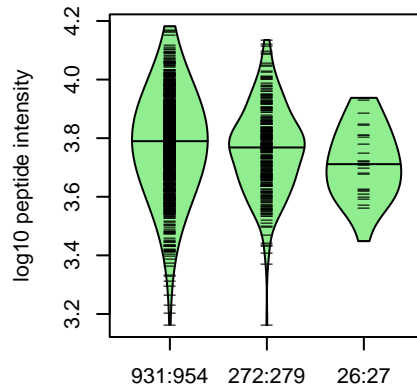

1:117854911:C:T\_T  
p = 0.019, beta = -0.137, N = 1229

**MYDDAIEAIEK pc2  
O60476**

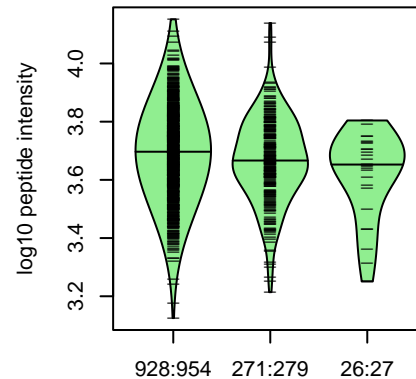

1:117854911:C:T\_T  
p = 0.0034, beta = -0.171, N = 1225

**GGLTFIGEWK pc2  
O60476**

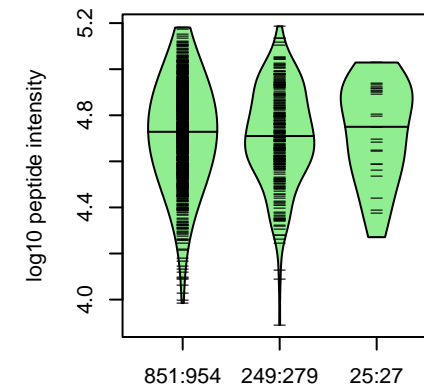

1:117854911:C:T\_T  
p = 0.81, beta = -0.0145, N = 1125

**MAN1A2 : NP5  
O60476**

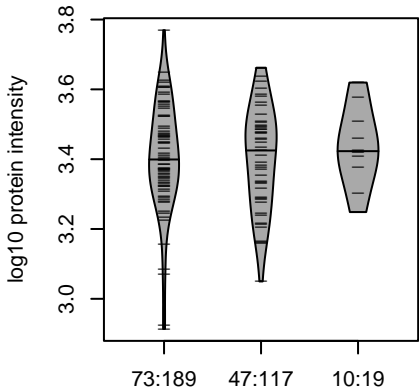

1:117854911:C:T\_T  
p = 0.53, beta = 0.084, N = 130

**AWLMSDK pc2  
O60476;P33908**

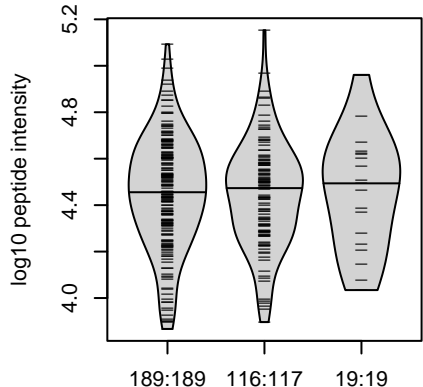

1:117854911:C:T\_T  
p = 0.9, beta = -0.0112, N = 324

**RFDLGLDVLIPHVDAGK pc3  
O60476**

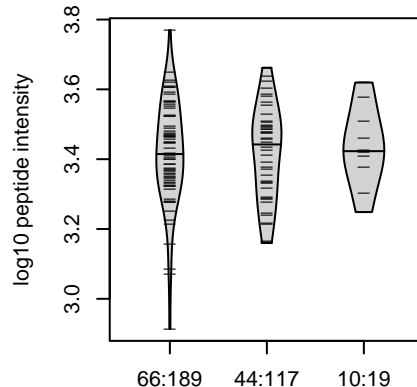

1:117854911:C:T\_T  
p = 0.64, beta = 0.0652, N = 120

Assay Target: MAN1A2  
Olink UniProt: O60476  
deCODE rsID: rs73013841  
Proxy rsID: rs73013841  
deCODE: 1:117312289:T:C  
Proxy SNP: 1:117854911:C:T  
deCODE log10(p): 109.1  
deCODE BETA: -0.3  
- - - - -  
1249:1229:1225:1125:1124:998

**GLTPD2 : NP4  
A6NH11**

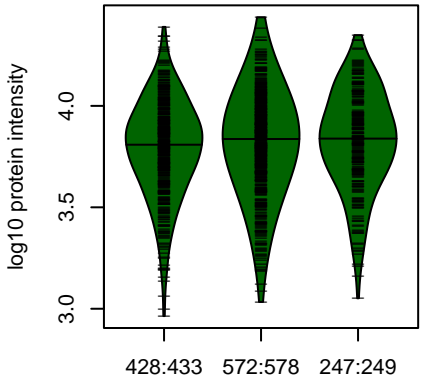

17:4690038:C:A\_A  
p = 0.023, beta = 0.0891, N = 1247

**LALFLAFPGR pc2  
A6NH11**

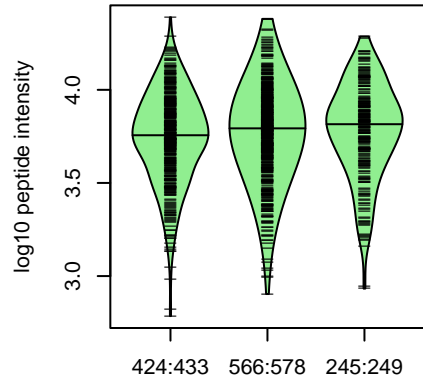

17:4690038:C:A\_A  
p = 0.032, beta = 0.0841, N = 1235

**TLLLLHR pc2  
A6NH11**

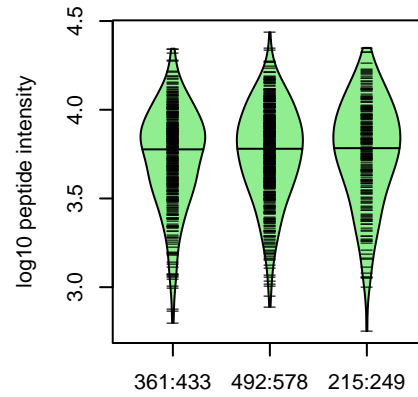

17:4690038:C:A\_A  
p = 0.15, beta = 0.0605, N = 1068

**LLELACPGATEAEAR pc2  
A6NH11**

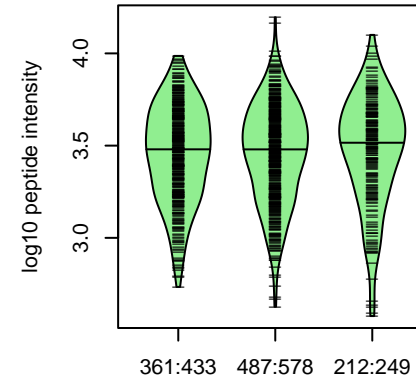

17:4690038:C:A\_A  
p = 0.38, beta = 0.0371, N = 1060

**AALGPHHPWLVR pc3  
A6NH11**

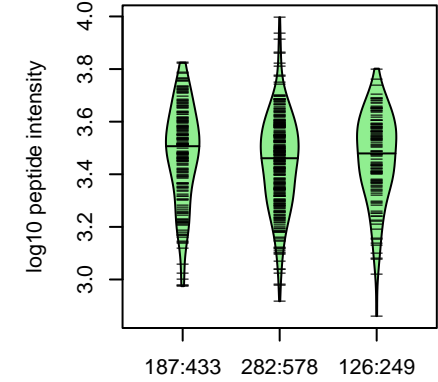

17:4690038:C:A\_A  
p = 0.45, beta = -0.0428, N = 595

**GLTPD2 : NP4  
A6NH11**

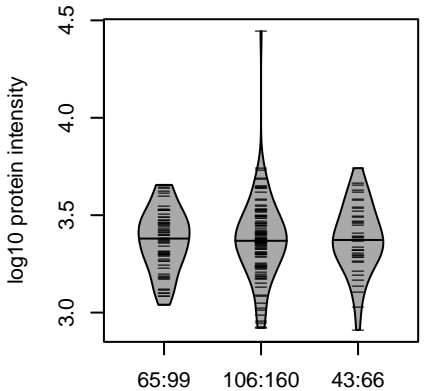

17:4690038:C:A\_C  
p = 0.87, beta = 0.0152, N = 214

**LLELACPGATEAEAR pc2  
A6NH11**

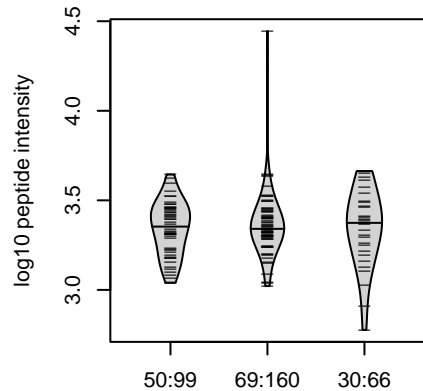

17:4690038:C:A\_C  
p = 0.93, beta = 0.0104, N = 149

**LALFLAFPGR pc2  
A6NH11**

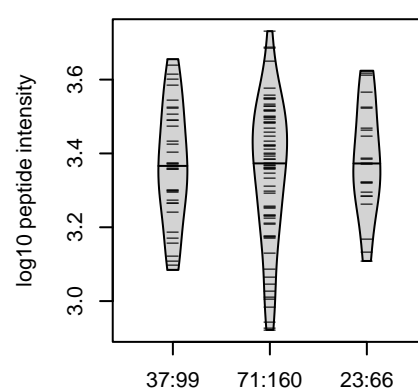

17:4690038:C:A\_C  
p = 0.8, beta = 0.0317, N = 131

**TLLLLHR pc2  
A6NH11**

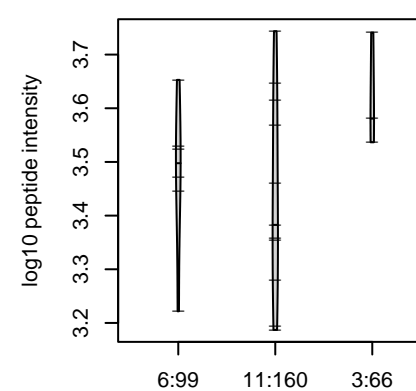

17:4690038:C:A\_C  
p = 0.3, beta = 0.324, N = 20

**AQPCVPGETAPFQVR pc2  
rs2304969 REF**

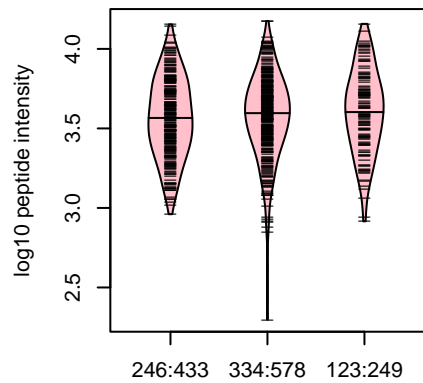

17:4690038:C:A\_A  
p = 0.027, model = DOM, N = 703

Assay Target: GLTPD2  
Olink UniProt: A6NH11  
deCODE rsID: rs8078118  
Proxy rsID: rs8078118  
deCODE: 17:4786743:A:C  
Proxy SNP: 17:4690038:C:A  
deCODE log10(p): 108.7  
deCODE BETA: 0.19  
- - - - -  
1235:1068:1060:595:48

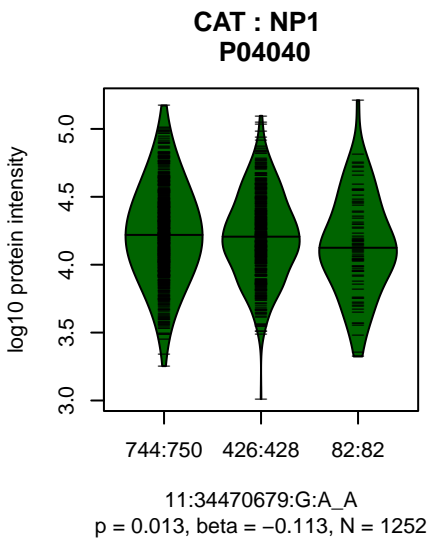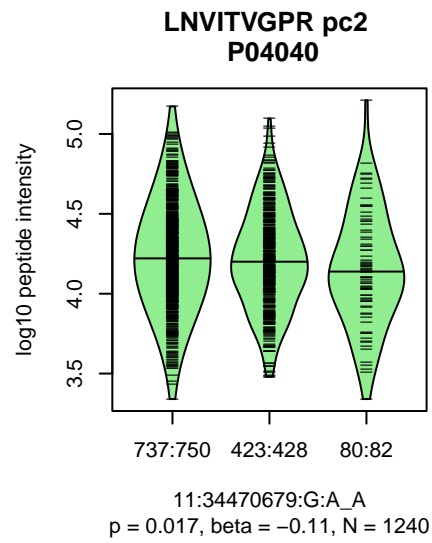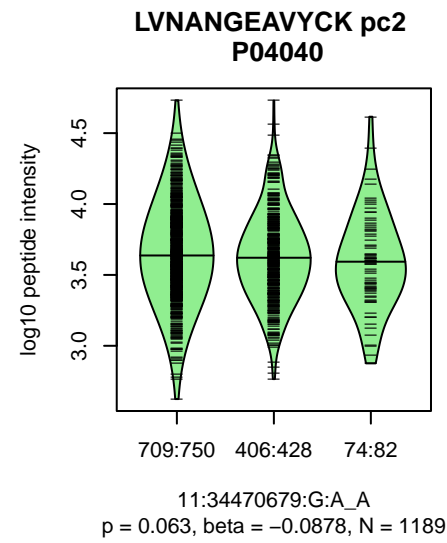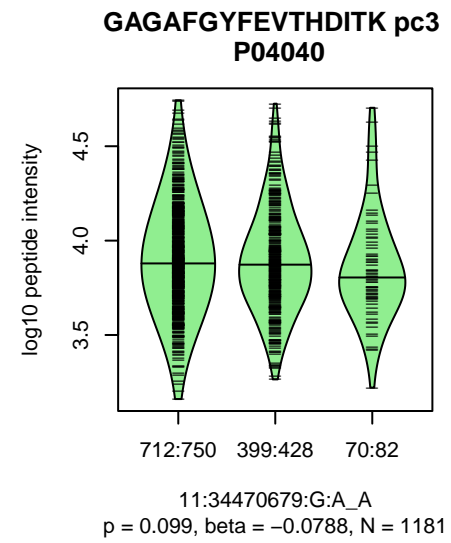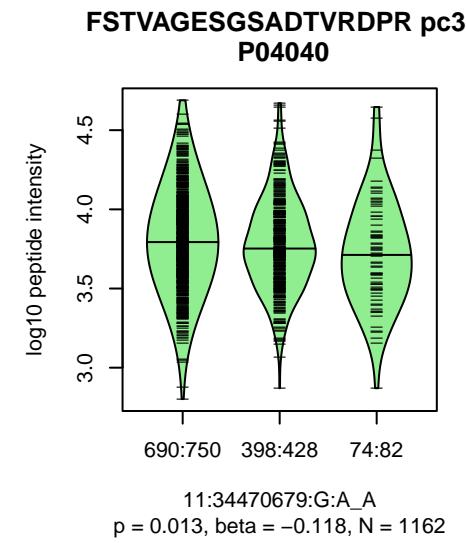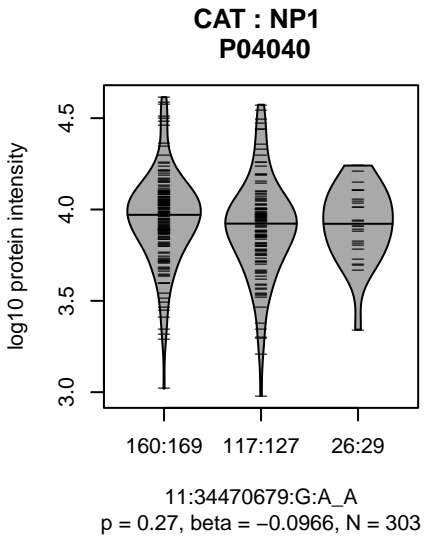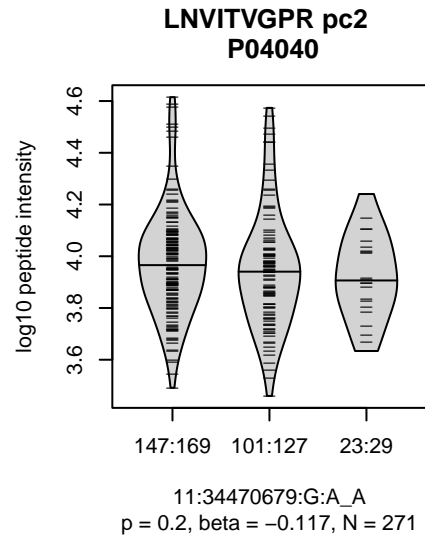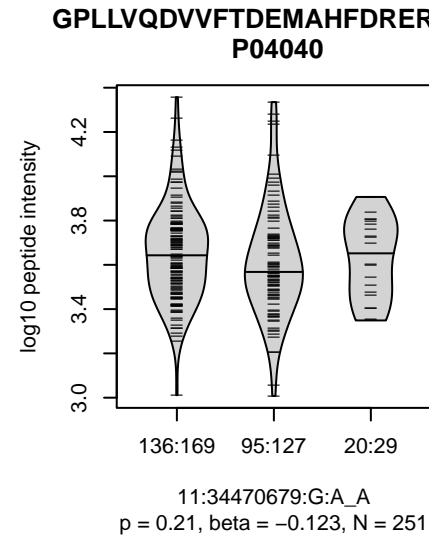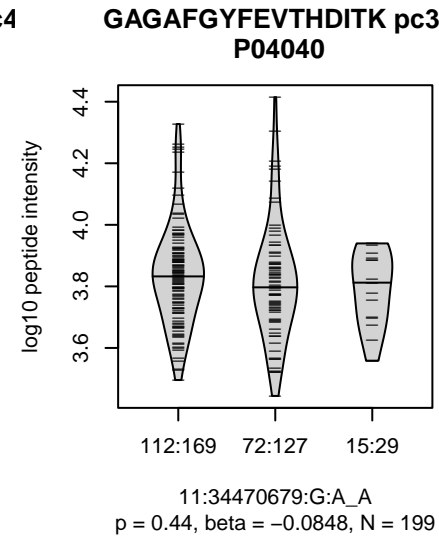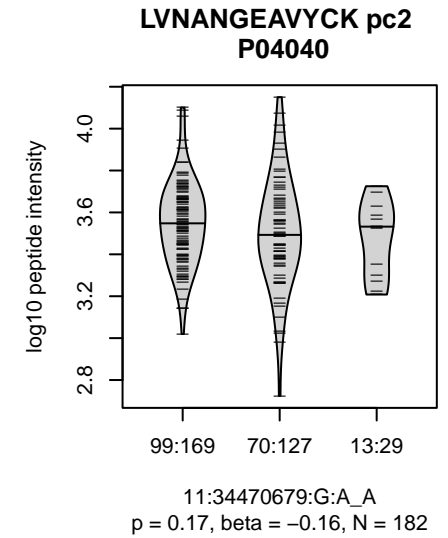

Assay Target: CAT  
 Olink UniProt: P04040  
 deCODE rsID: rs769218  
 Proxy rsID: rs769218  
 deCODE: 11:34449132:A:G  
 Proxy SNP: 11:34470679:G:A  
 deCODE log10(p): 106.5  
 deCODE BETA: -0.21  
 -----  
 1240:1189:1181:1162:1087:105





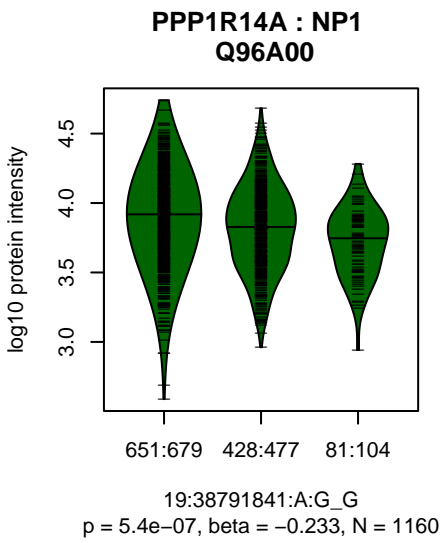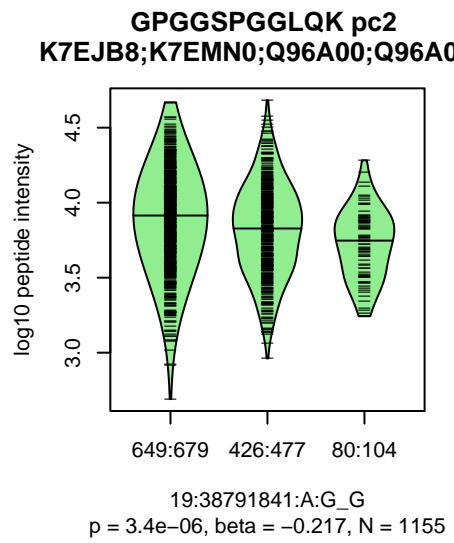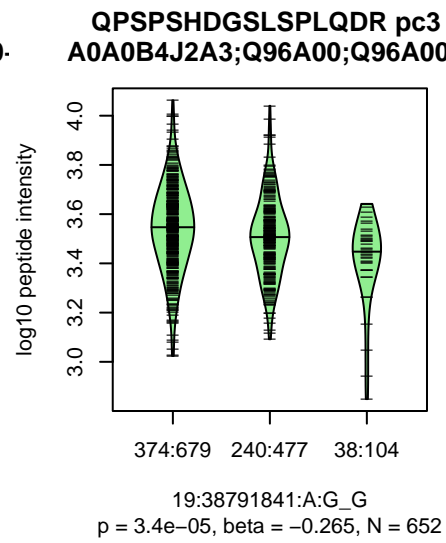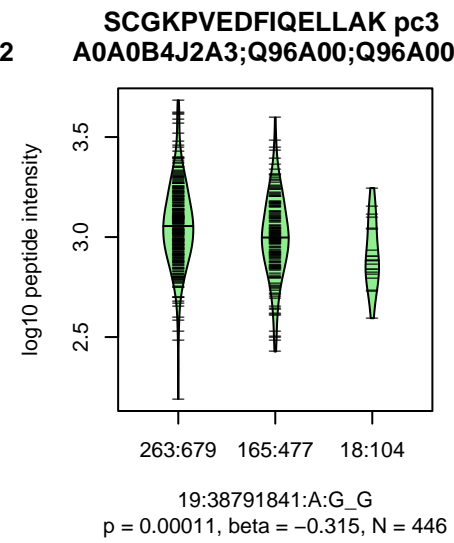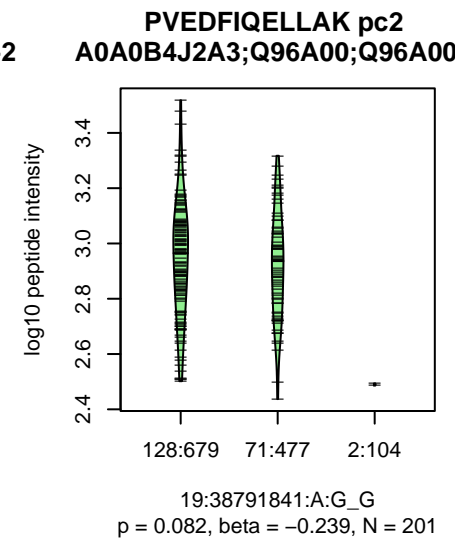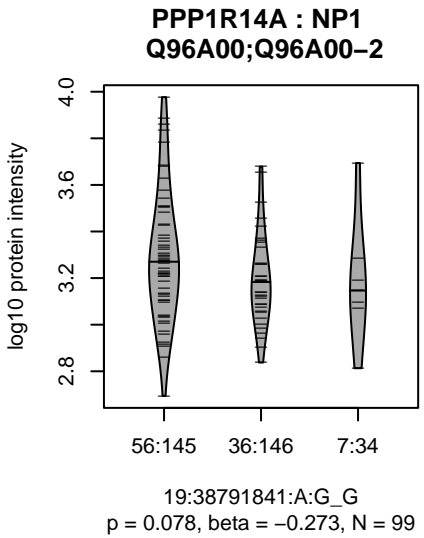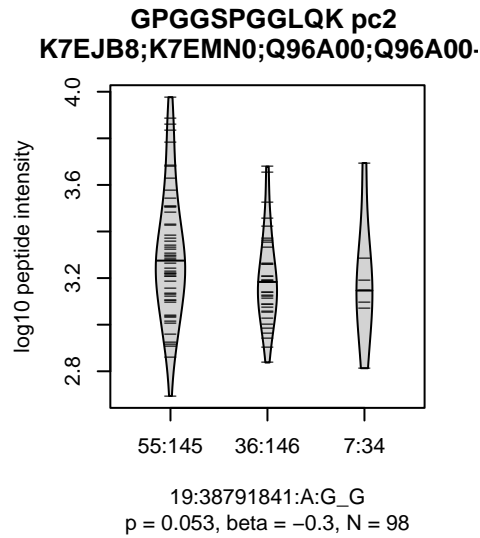

Assay Target: PPP1R14A  
 Olink UniProt: Q96A00  
 deCODE rsID: rs71354995  
 Proxy rsID: rs71354995  
 deCODE: 19:38301201:G:A  
 Proxy SNP: 19:38791841:A:G  
 deCODE log10(p): 103.5  
 deCODE BETA: -0.2  
 \*.\*.\*.-.-  
 1155:652:446:201:90



**APOF : NP2  
Q13790**

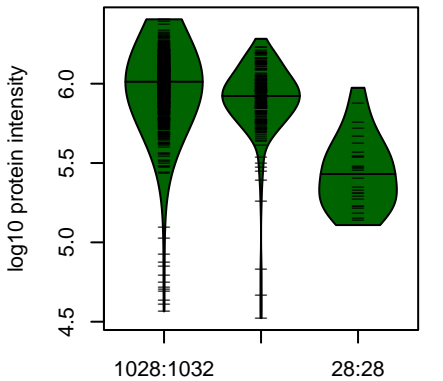

12:56743367:T:C\_C  
p = 2.2e-09, beta = -0.367, N = 1256

**SLPTEDCENEK pc2  
Q13790**

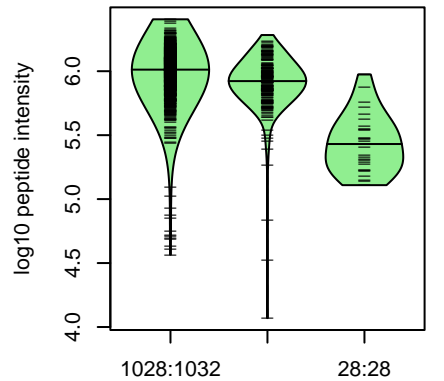

12:56743367:T:C\_C  
p = 5.1e-09, beta = -0.359, N = 1256

**SGVQQLIQYYQDQK pc2  
Q13790**

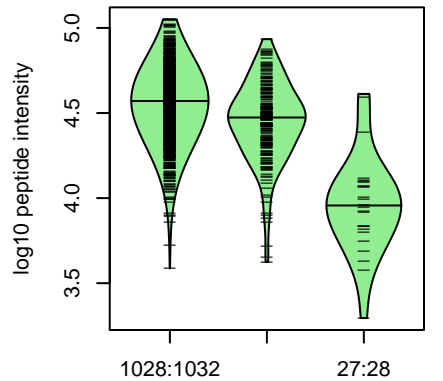

12:56743367:T:C\_C  
p = 2.8e-08, beta = -0.343, N = 1255

**SLPGFSHMAPLPK pc2  
Q13790**

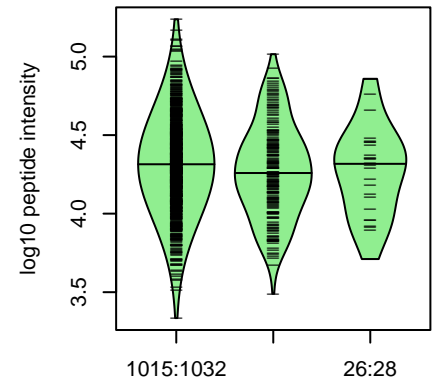

12:56743367:T:C\_C  
p = 0.041, beta = -0.128, N = 1239

**FLVSLALR pc2  
Q13790**

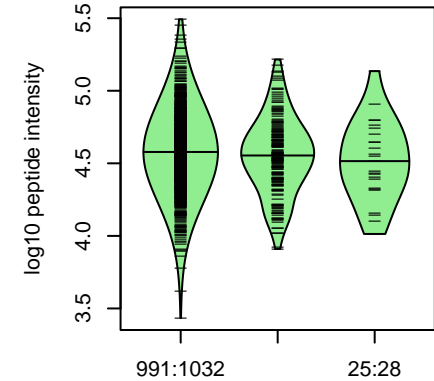

12:56743367:T:C\_C  
p = 0.12, beta = -0.1, N = 1204

**APOF : NP2  
Q13790**

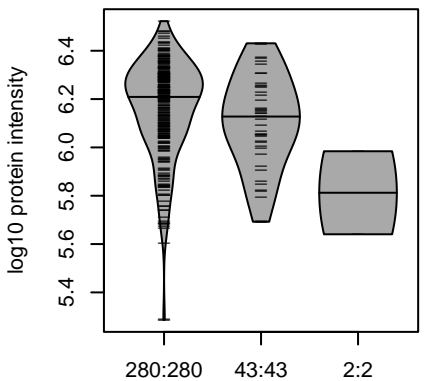

12:56743367:T:C\_C  
p = 0.013, beta = -0.367, N = 325

**FLVSLALR pc2  
Q13790**

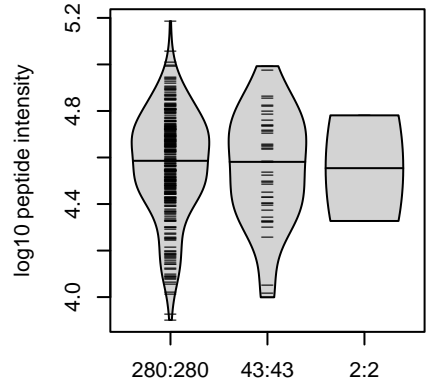

12:56743367:T:C\_C  
p = 0.31, beta = -0.15, N = 325

**SGVQQLIQYYQDQK pc2  
Q13790**

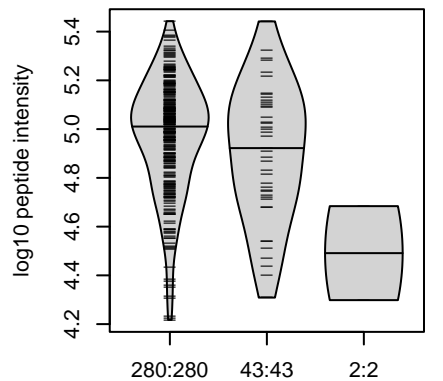

12:56743367:T:C\_C  
p = 0.029, beta = -0.323, N = 325

**SLPTEDCENEK pc2  
Q13790**

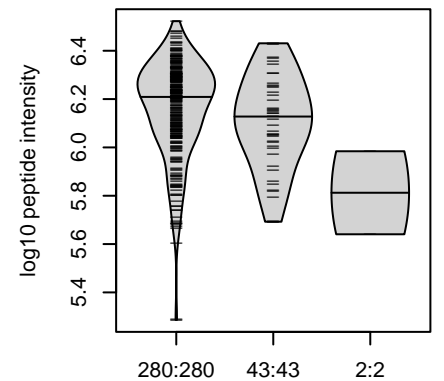

12:56743367:T:C\_C  
p = 0.013, beta = -0.367, N = 325

**SLPGFSHMAPLPK pc2  
Q13790**

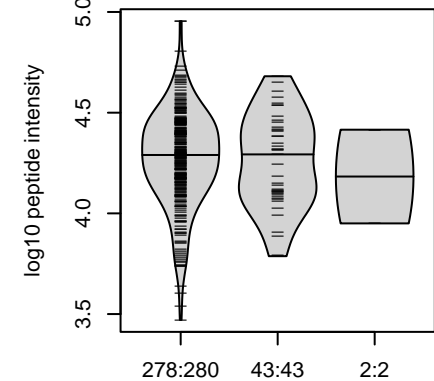

12:56743367:T:C\_C  
p = 0.17, beta = -0.205, N = 323

Assay Target: APOF  
Olink UniProt: Q13790  
deCODE rsID: rs2020854  
Proxy rsID: rs2020854  
deCODE: 12:56349583:C:T  
Proxy SNP: 12:56743367:T:C  
deCODE log10(p): 101.5  
deCODE BETA: -0.31  
\*.\*.\*-.-.-.-.-  
1256:1255:1254:1239:1204:625

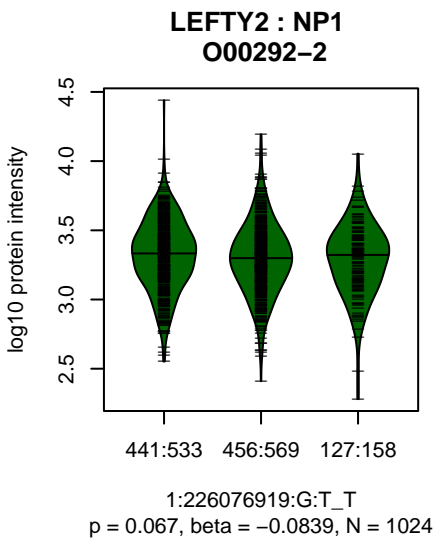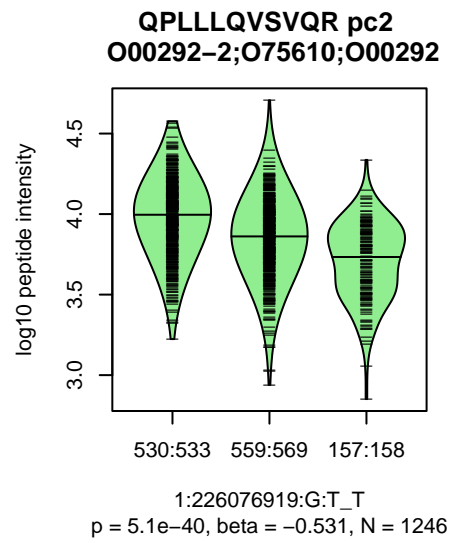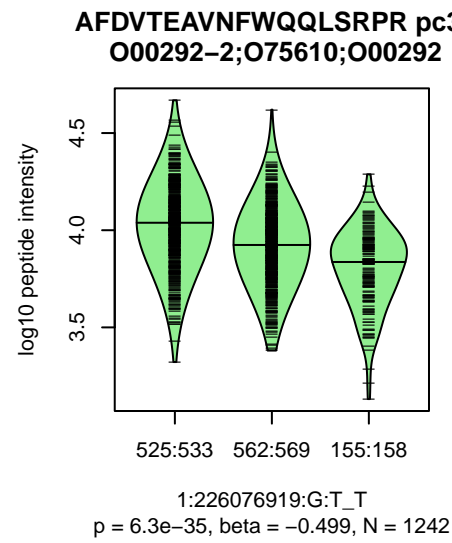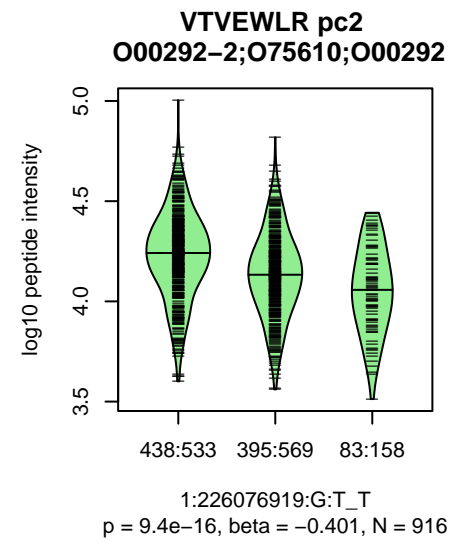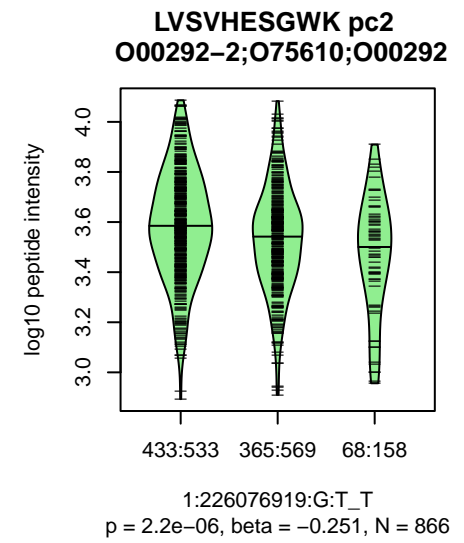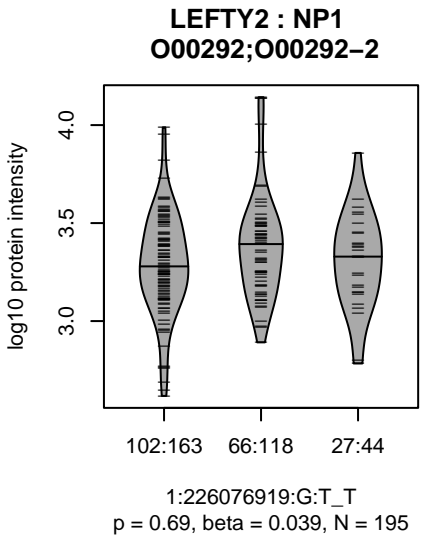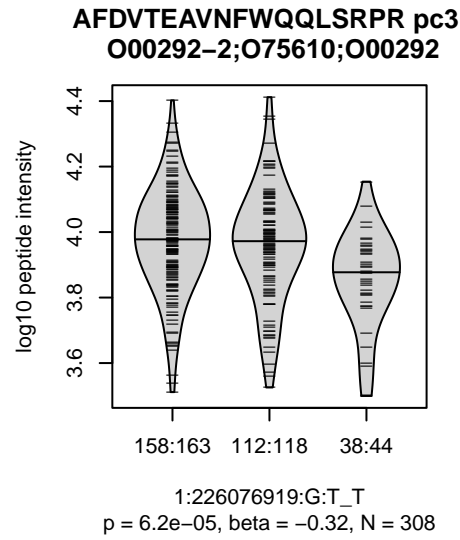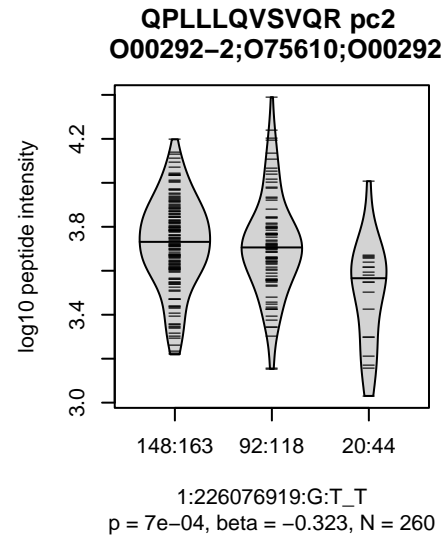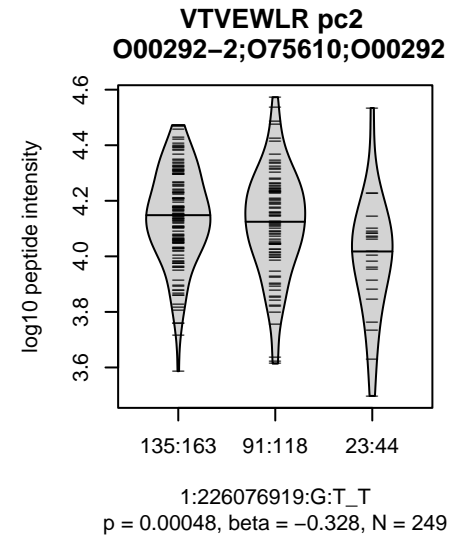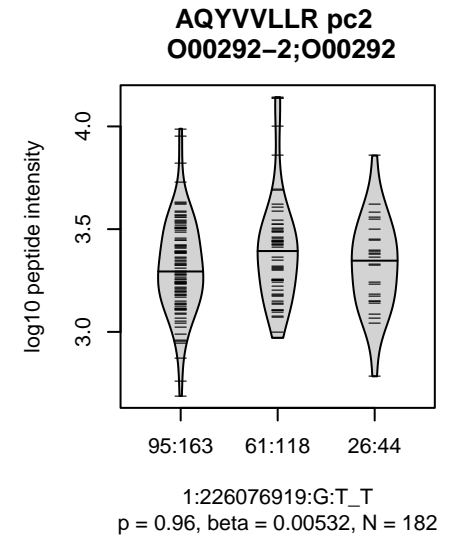

Assay Target: LEFTY2  
 Olink UniProt: O00292  
 deCODE rsID: rs360058  
 Proxy rsID: rs360058  
 deCODE: 1:225889219:T:G  
 Proxy SNP: 1:226076919:G:T  
 deCODE log10(p): 101  
 deCODE BETA: -0.18  
 \*.\*.\*.\*.-.-.-.-  
 1246:1242:916:866:856:628:337

**CD59 : NP1  
P13987**

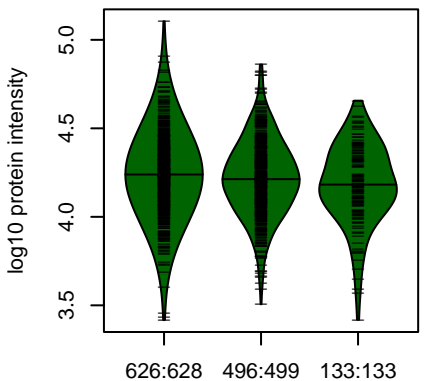

11:33743019:C:T\_T  
p = 0.0018, beta = -0.131, N = 1255

**FEHCNFNDVTR pc3  
E9PNW4;P13987-2;P13987**

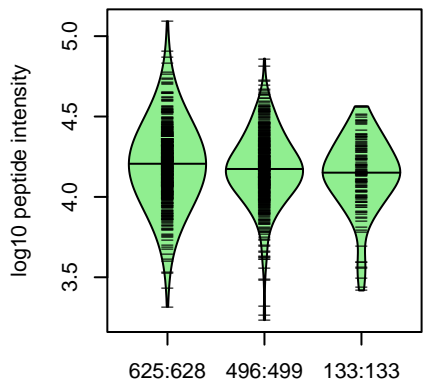

11:33743019:C:T\_T  
p = 0.00062, beta = -0.143, N = 1254

**AGLQVYNK pc2  
E9PNW4;P13987-2;P13987**

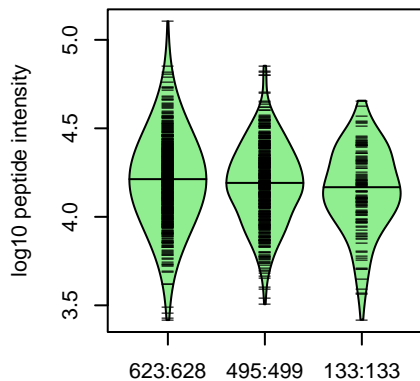

11:33743019:C:T\_T  
p = 0.0021, beta = -0.129, N = 1251

**LRENELTYYCCK pc3  
E9PNW4;P13987-2;P13987**

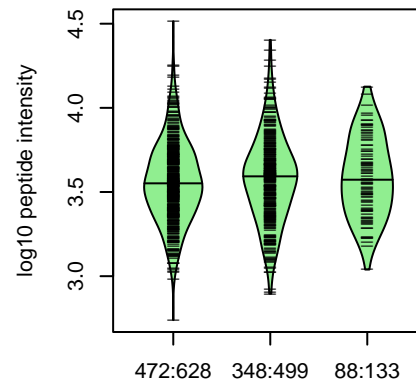

11:33743019:C:T\_T  
p = 0.36, beta = 0.0452, N = 908

**ENELTYYCCK pc2  
E9PNW4;P13987-2;P13987**

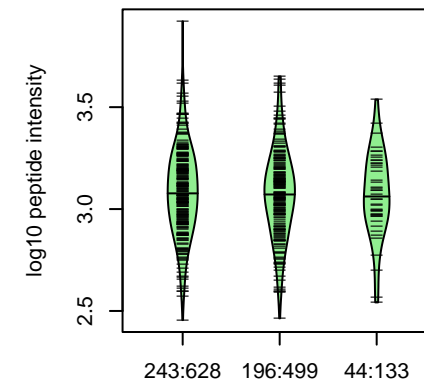

11:33743019:C:T\_T  
p = 0.31, beta = -0.0706, N = 483

**CD59 : NP1  
P13987**

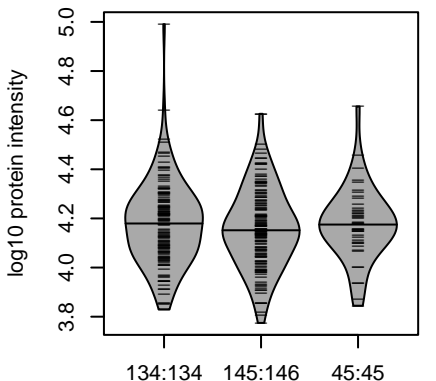

11:33743019:C:T\_T  
p = 0.46, beta = -0.0587, N = 324

**FEHCNFNDVTR pc3  
E9PNW4;P13987-2;P13987**

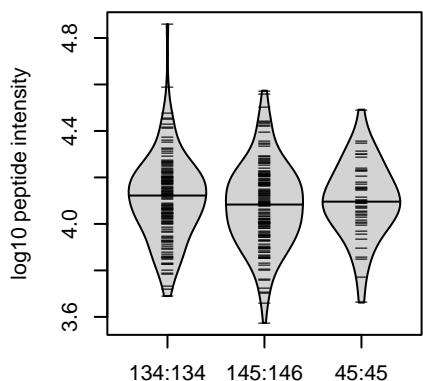

11:33743019:C:T\_T  
p = 0.24, beta = -0.0925, N = 324

**AGLQVYNK pc2  
E9PNW4;P13987-2;P13987**

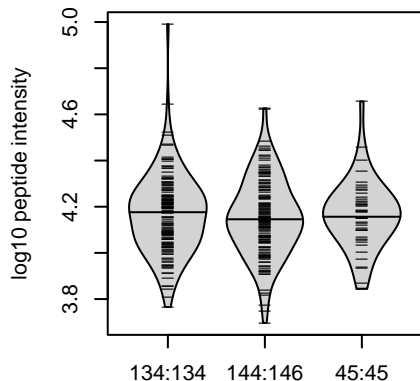

11:33743019:C:T\_T  
p = 0.51, beta = -0.0523, N = 323

**LRENELTYYCCK pc3  
E9PNW4;P13987-2;P13987**

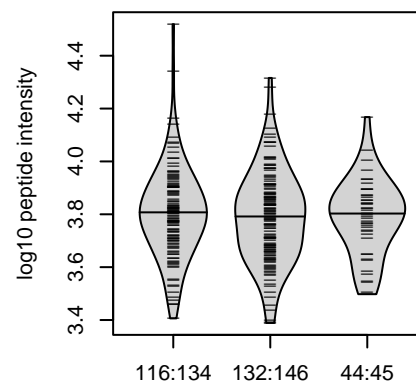

11:33743019:C:T\_T  
p = 0.33, beta = -0.0799, N = 292

**ENELTYYCCK pc2  
E9PNW4;P13987-2;P13987**

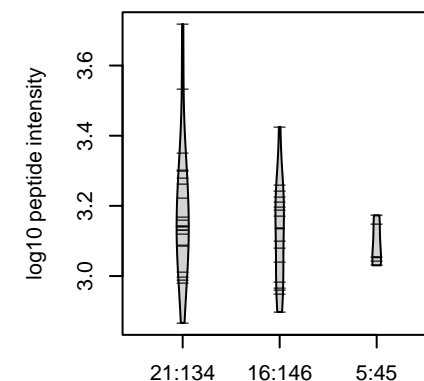

11:33743019:C:T\_T  
p = 0.59, beta = -0.115, N = 42

Assay Target: CD59  
Olink UniProt: P13987  
deCODE rsID: rs831630  
Proxy rsID: rs831630  
deCODE: 11:33721473:T:C  
Proxy SNP: 11:33743019:C:T  
deCODE log10(p): 100.3  
deCODE BETA: -0.18  
\*.\*-:-:-:-  
1254:1251:908:589:483:60

**ANTXR2 : NP1**  
**P58335-4**

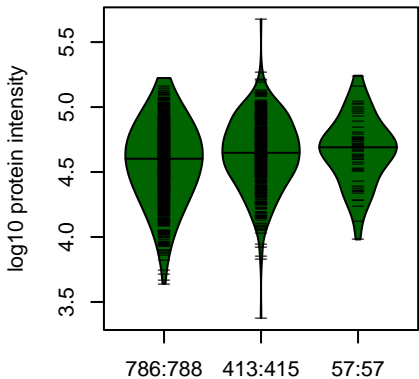

4:80794681:C:T\_T  
 $p = 3.7e-05$ ,  $\beta = 0.2$ ,  $N = 1256$

**TSSIIIALTDGK pc2**

**7P0TAR4;A0A7P0Z4A8;J3KPY9;P5837P0TAR4;A0A7P0Z4A8;J3KPY9;P5837P0TAR4;A0A7P0Z4A8;J3KPY9;P5837P0TAR4;A0A7P0Z4A8;J3KPY9;P583**

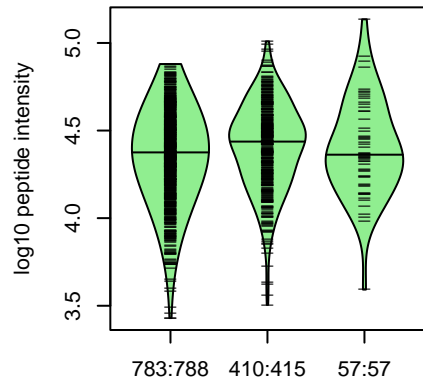

4:80794681:C:T\_T  
 $p = 0.0024$ ,  $\beta = 0.147$ ,  $N = 1250$

**LDGLVPSYAEK pc2**

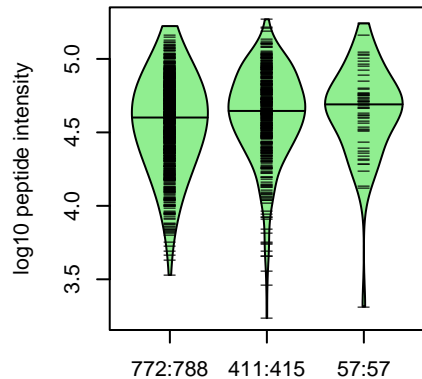

4:80794681:C:T\_T  
 $p = 0.00099$ ,  $\beta = 0.16$ ,  $N = 1240$

**VSPVGETYIHEGLK pc3**

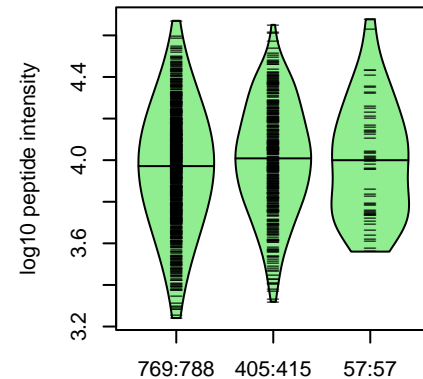

4:80794681:C:T\_T  
 $p = 0.026$ ,  $\beta = 0.109$ ,  $N = 1231$

**LANEQIQK pc2**

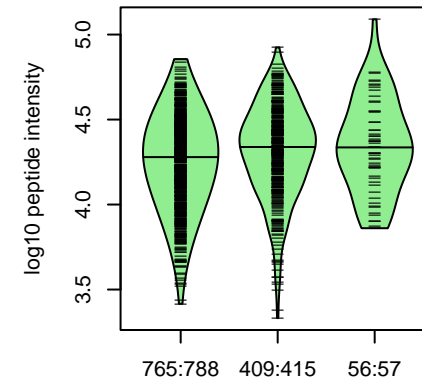

4:80794681:C:T\_T  
 $p = 8.7e-05$ ,  $\beta = 0.192$ ,  $N = 1230$

**ANTXR2 : NP1**  
**P58335-4**

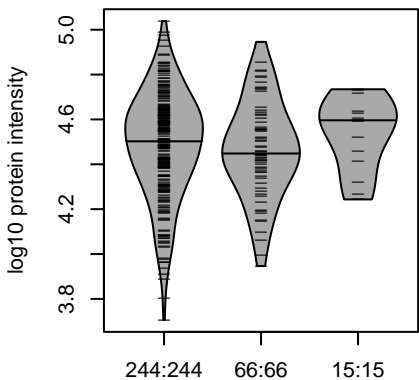

4:80794681:C:T\_T  
 $p = 0.61$ ,  $\beta = -0.0508$ ,  $N = 325$

**TSSIIIALTDGK pc2**

**7P0TAR4;A0A7P0Z4A8;J3KPY9;P5837P0TAR4;A0A7P0Z4A8;J3KPY9;P5837P0TAR4;A0A7P0Z4A8;J3KPY9;P5837P0TAR4;A0A7P0Z4A8;J3KPY9;P583**

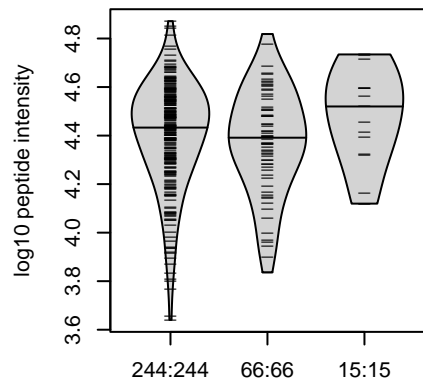

4:80794681:C:T\_T  
 $p = 0.95$ ,  $\beta = -0.00678$ ,  $N = 325$

**RVSPVGETYIHEGLK pc3**

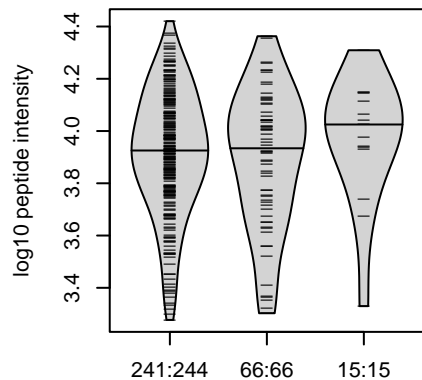

4:80794681:C:T\_T  
 $p = 0.71$ ,  $\beta = -0.0376$ ,  $N = 322$

**VSPVGETYIHEGLK pc3**

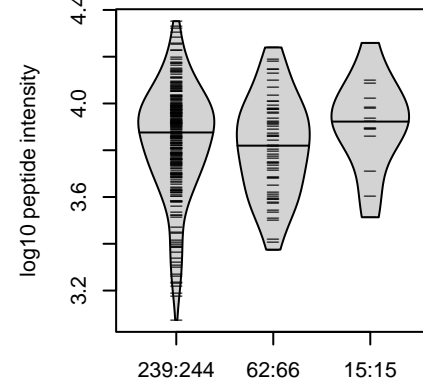

4:80794681:C:T\_T  
 $p = 0.71$ ,  $\beta = 0.0376$ ,  $N = 316$

**LANEQIQK pc2**

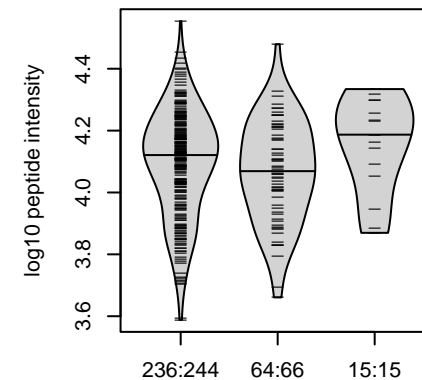

4:80794681:C:T\_T  
 $p = 0.8$ ,  $\beta = -0.026$ ,  $N = 315$

Assay Target: ANTXR2  
Olink UniProt: P58335  
deCODE rsID: rs7674623  
Proxy rsID: rs7674623  
deCODE: 4:79873527:T:C  
Proxy SNP: 4:80794681:C:T  
deCODE log10(p): 99.9  
deCODE BETA: 0.22  
\*:\*:-:\*:\*:\*:\*:\*:-:\*:-:\*:-:NA:NA  
1250:1240:1231:1230:1223:122



**B4GALT1 : NP2**  
**P15291**

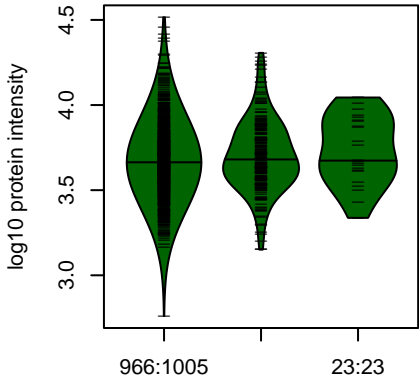

9:33113322:C:T\_T  
p = 0.025, beta = 0.139, N = 1216

**LLNVGFQEALK pc2**  
**P15291**

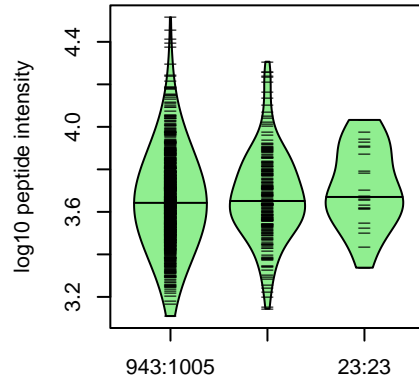

9:33113322:C:T\_T  
p = 0.05, beta = 0.122, N = 1191

**VAIIPFR pc2**  
**P15291;Q86XA6**

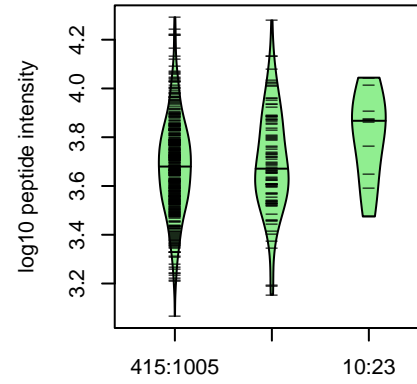

9:33113322:C:T\_T  
p = 0.054, beta = 0.18, N = 525

**ETMLSDGLNSLTYQVLDVQR pc3**  
**P15291**

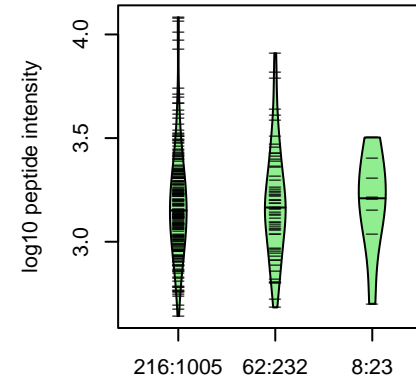

9:33113322:C:T\_T  
p = 0.87, beta = 0.0186, N = 286

**HISVAMDK pc2**  
**P15291**

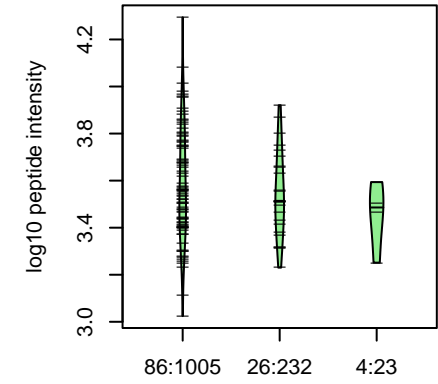

9:33113322:C:T\_T  
p = 0.2, beta = -0.222, N = 116

**B4GALT1 : NP2**  
**P15291**

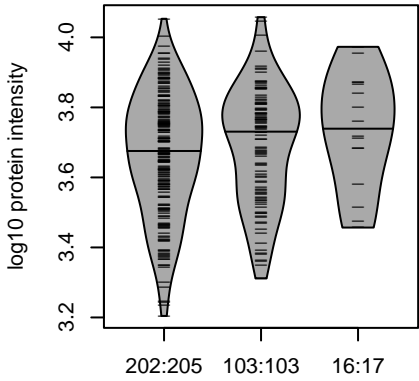

9:33113322:C:T\_T  
p = 0.0093, beta = 0.244, N = 321

**VAIIPFR pc2**  
**P15291;Q86XA6**

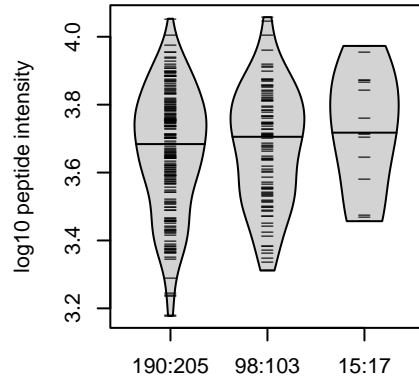

9:33113322:C:T\_T  
p = 0.03, beta = 0.209, N = 303

**LLNVGFQEALK pc2**  
**P15291**

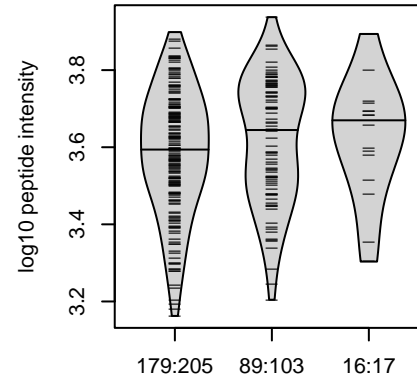

9:33113322:C:T\_T  
p = 0.009, beta = 0.254, N = 284

Assay Target: B4GALT1  
Olink UniProt: P15291  
deCODE rsID: rs7019909  
Proxy rsID: rs7019909  
deCODE: 9:33113324:T:C  
Proxy SNP: 9:33113322:C:T  
deCODE log10(p): 98.3  
deCODE BETA: 0.3  
-:-:-:-:-:NA  
1191:525:286:116:89:74:9



**CHST12 : NP4  
Q9NRB3**

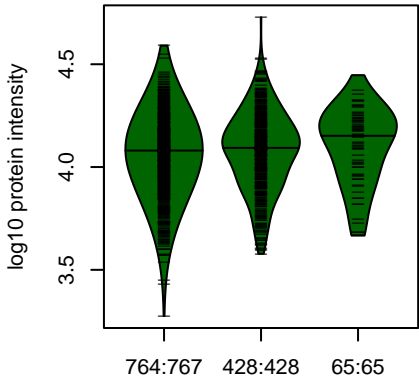

7:2396638:A:G\_A  
p = 0.052, beta = 0.0921, N = 1257

**FAVPMLR pc2  
Q9NRB3**

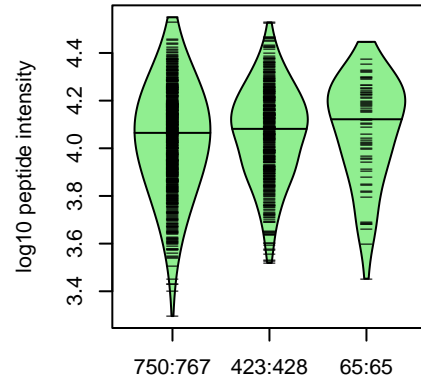

7:2396638:A:G\_A  
p = 0.033, beta = 0.102, N = 1238

**VACTNWK pc2  
Q8NET6;Q9NPF2-2;Q9NPF2;Q9NR1**

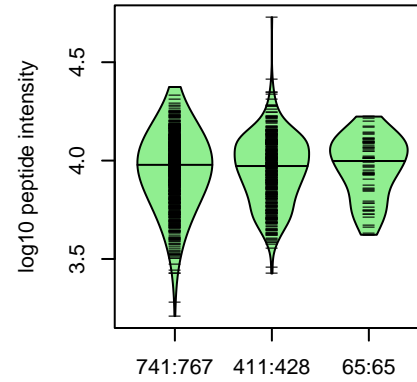

7:2396638:A:G\_A  
p = 0.67, beta = 0.0205, N = 1217

**LCHPCQIDYDFVGK pc3  
Q9NRB3**

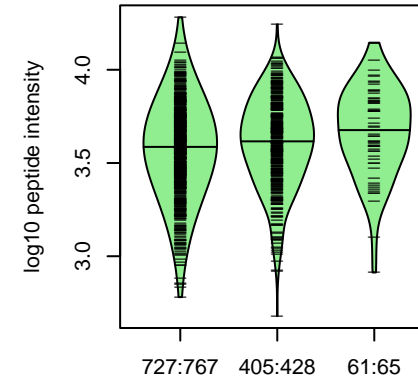

7:2396638:A:G\_A  
p = 0.00042, beta = 0.172, N = 1193

**VSFANFIQYLLDPHTEK pc3  
Q9NRB3**

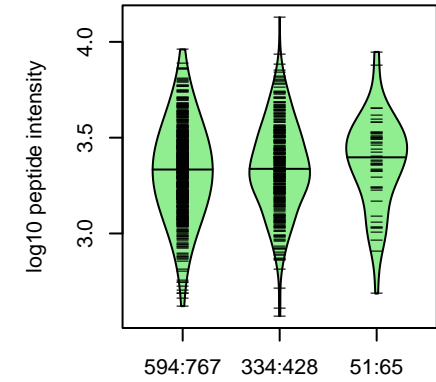

7:2396638:A:G\_A  
p = 0.14, beta = 0.0785, N = 979

**CHST12 : NP4  
Q9NRB3**

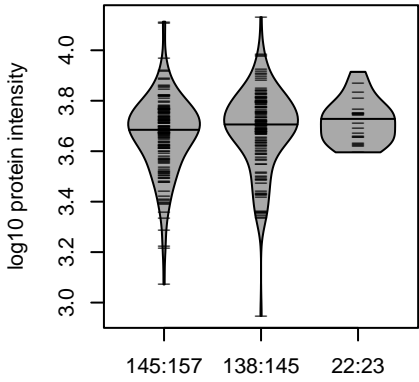

7:2396638:A:G\_A  
p = 0.05, beta = 0.178, N = 305

**LCHPCQIDYDFVGK pc3  
Q9NRB3**

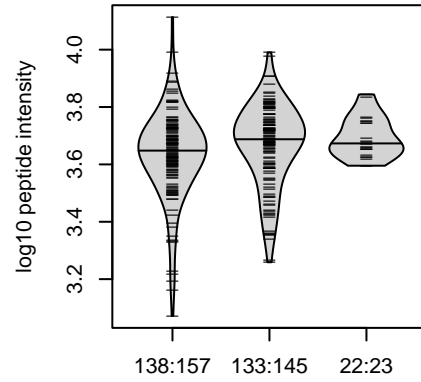

7:2396638:A:G\_A  
p = 0.013, beta = 0.227, N = 293

**VSFANFIQYLLDPHTEK pc3  
Q9NRB3**

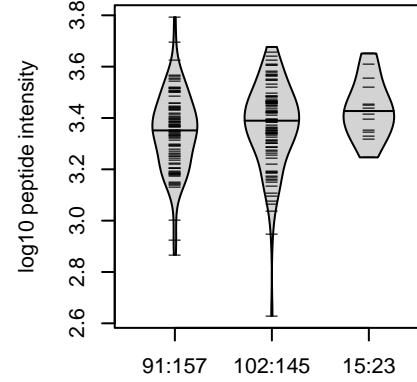

7:2396638:A:G\_A  
p = 0.055, beta = 0.212, N = 208

**FAVPMLR pc2  
Q9NRB3**

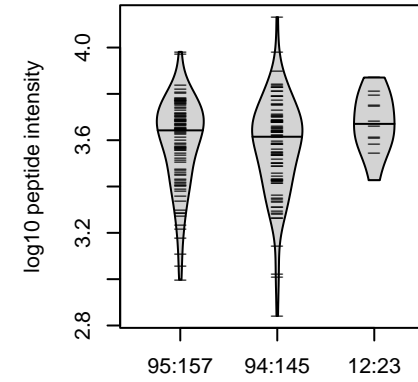

7:2396638:A:G\_A  
p = 0.41, beta = 0.0956, N = 201

**HGAIYCYVPK pc2  
Q9NRB3**

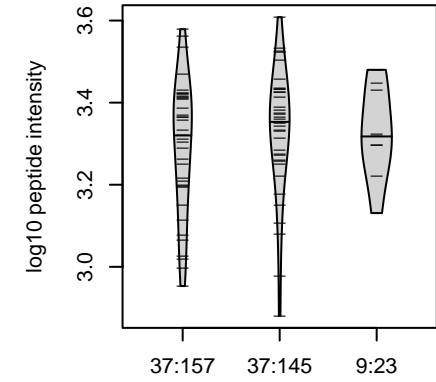

7:2396638:A:G\_A  
p = 0.33, beta = 0.157, N = 83

Assay Target: CHST12  
Olink UniProt: Q9NRB3  
deCODE rsID: rs6952433  
Proxy rsID: rs6952433  
deCODE: 7:2357003:A:G  
Proxy SNP: 7:2396638:A:G  
deCODE log10(p): 95  
deCODE BETA: 0.2  
-:-\*:--:-:-:-:-:-:-NA  
1238:1217:1193:979:807:685:67

**SHBG : NP2  
P04278**

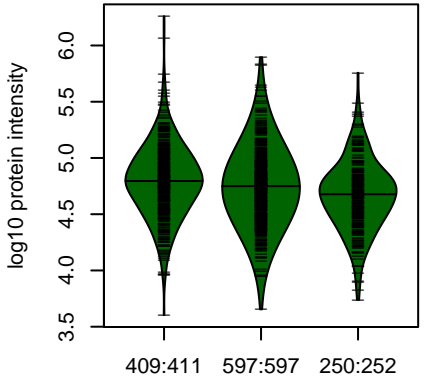

17:7531965:T:C\_T  
p = 8.4e-08, beta = -0.21, N = 1256

**VVLSQGSK pc2  
I3L145;I3L2X4;P04278;P04278-5\_L2F1;I3L2X4;I3L4B9;P04278;P04278-2\_J1;P04278;P04278-2;P04278-3;P042F1;I3L2X4;I3L4B9;P04278;P04278-2;**

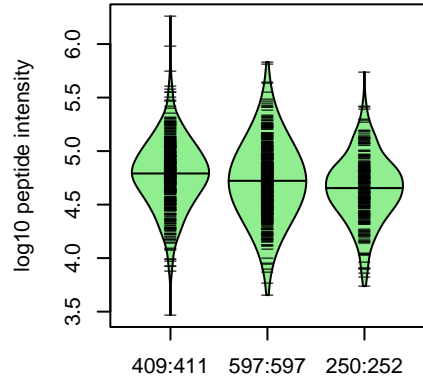

17:7531965:T:C\_T  
p = 7.5e-08, beta = -0.211, N = 1256

**QAEISASAPTSR pc2**

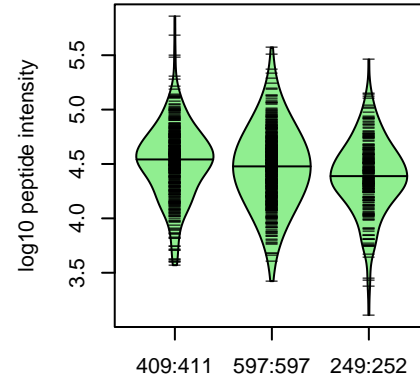

17:7531965:T:C\_T  
p = 5.1e-07, beta = -0.197, N = 1255

**QVSGPLTSK pc2**

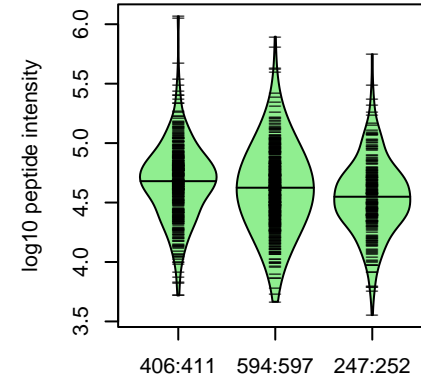

17:7531965:T:C\_T  
p = 6.8e-08, beta = -0.212, N = 1247

**DGRPEIQLHNNHWAQLTVGAGPR pc2**

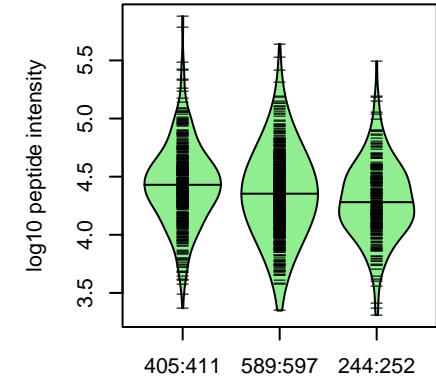

17:7531965:T:C\_T  
p = 1.1e-06, beta = -0.193, N = 1238

**SHBG : NP2  
P04278**

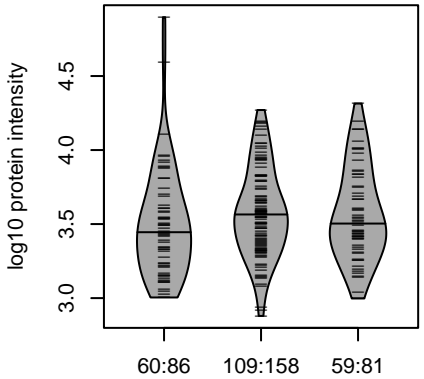

17:7531965:T:C\_C  
p = 0.17, beta = 0.124, N = 228

**QAEISASAPTSR pc2  
L2F1;I3L2X4;I3L4B9;P04278;P04278-2F1;I3L2X4;I3L4B9;P04278;P04278-2;**

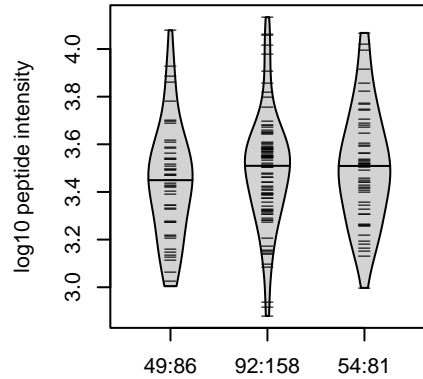

17:7531965:T:C\_C  
p = 0.24, beta = 0.114, N = 195

**DGRPEIQLHNNHWAQLTVGAGPR pc2**

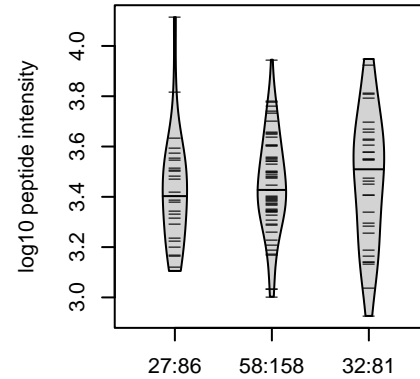

17:7531965:T:C\_C  
p = 0.21, beta = 0.16, N = 117

**VVLSQGSK pc2  
I3L145;I3L2X4;P04278;P04278-5;I3L2F1;I3L2X4;I3L4B9;P04278;P04278-2;**

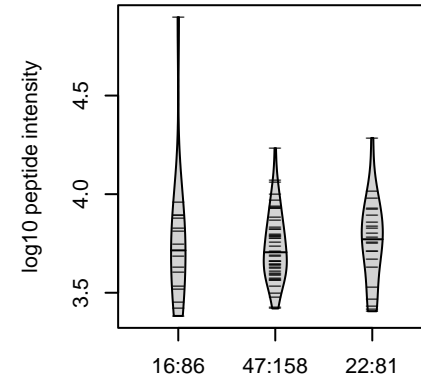

17:7531965:T:C\_C  
p = 0.89, beta = -0.0211, N = 85

**DDWFMLGLR pc2**

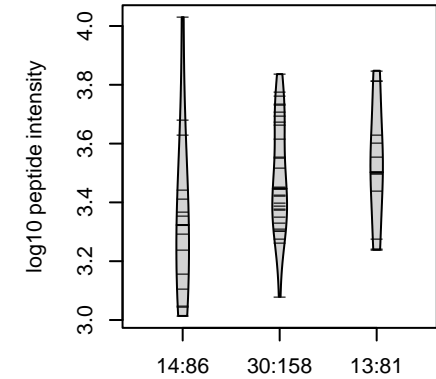

17:7531965:T:C\_C  
p = 0.016, beta = 0.434, N = 57

Assay Target: SHBG  
Olink UniProt: P04278  
deCODE rsID: rs858519  
Proxy rsID: rs858519  
deCODE: 17:7628647:T:C  
Proxy SNP: 17:7531965:T:C  
deCODE log10(p): 94  
deCODE BETA: -0.17  
\*\*\*\*\*  
1256:1255:1247:1238:1238:123



**SMOC1 : NP4**  
**Q9H4F8;Q9H4F8-2**

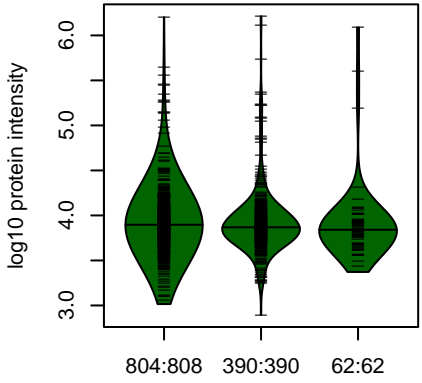

14:70354858:A:C\_A  
 $p = 0.033$ ,  $\beta = -0.102$ ,  $N = 1256$

**YVMPSCESDAR pc2**  
**Q9H4F8-2;Q9H4F8**

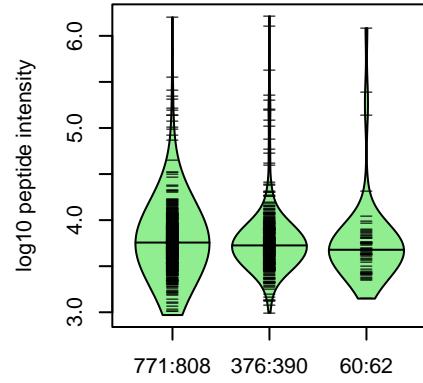

14:70354858:A:C\_A  
 $p = 0.026$ ,  $\beta = -0.109$ ,  $N = 1207$

**QSALEEAQQNPR pc2**  
**Q9H4F8-2;Q9H4F8**

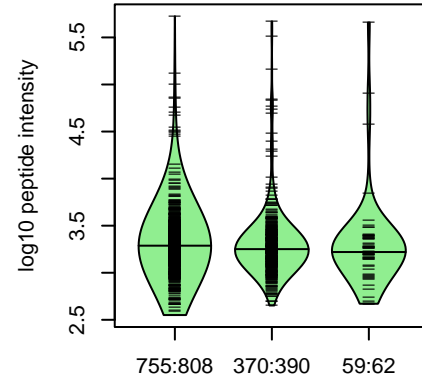

14:70354858:A:C\_A  
 $p = 0.039$ ,  $\beta = -0.102$ ,  $N = 1184$

**EGVIPECAPGGLYK pc2**  
**Q9H4F8-2;Q9H4F8**

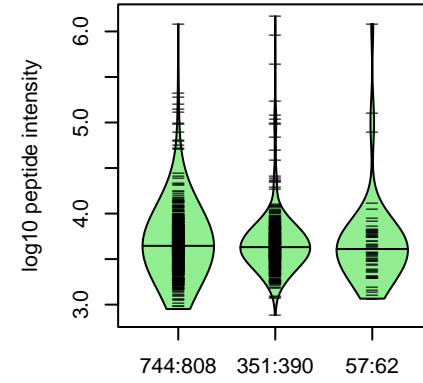

14:70354858:A:C\_A  
 $p = 0.28$ ,  $\beta = -0.0546$ ,  $N = 1152$

**SYESMCEYQR pc2**  
**Q9H4F8-2;Q9H4F8**

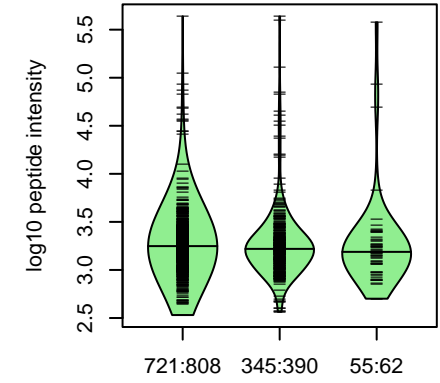

14:70354858:A:C\_A  
 $p = 0.027$ ,  $\beta = -0.113$ ,  $N = 1121$

**SMOC1 : NP4**  
**Q9H4F8;Q9H4F8-2**

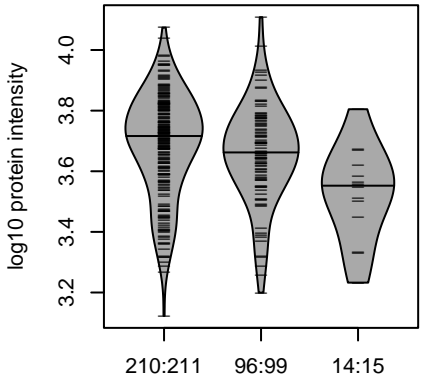

14:70354858:A:C\_A  
 $p = 0.00037$ ,  $\beta = -0.342$ ,  $N = 320$

**QSALEEAQQNPR pc2**  
**Q9H4F8-2;Q9H4F8**

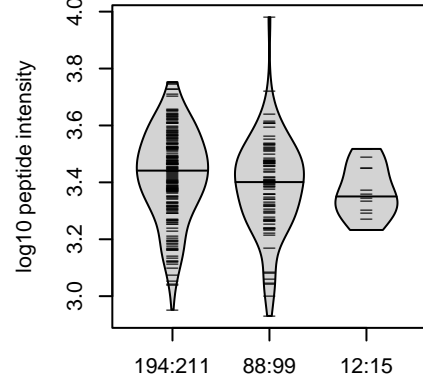

14:70354858:A:C\_A  
 $p = 0.0024$ ,  $\beta = -0.307$ ,  $N = 294$

**SYESMCEYQR pc2**  
**Q9H4F8-2;Q9H4F8**

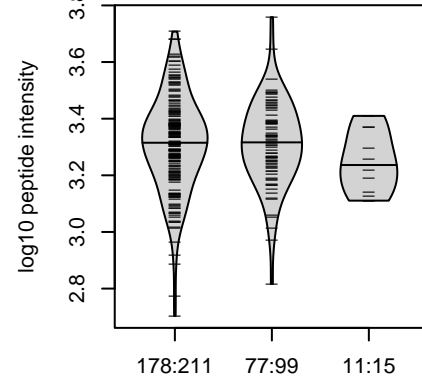

14:70354858:A:C\_A  
 $p = 0.21$ ,  $\beta = -0.135$ ,  $N = 266$

**YVMPSCESDAR pc2**  
**Q9H4F8-2;Q9H4F8**

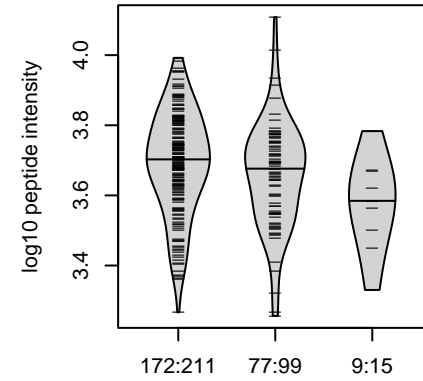

14:70354858:A:C\_A  
 $p = 0.0034$ ,  $\beta = -0.325$ ,  $N = 258$

**TTEADDPFK pc2**  
**Q9H4F8-2;Q9H4F8**

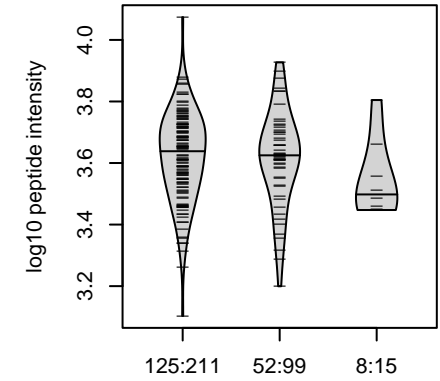

14:70354858:A:C\_A  
 $p = 0.22$ ,  $\beta = -0.156$ ,  $N = 185$

Assay Target: SMOC1  
Olink UniProt: Q9H4F8  
deCODE rsID: rs1958078  
Proxy rsID: rs1958078  
deCODE: 14:69888141:A:C  
Proxy SNP: 14:70354858:A:C  
deCODE log10(p): 92.2  
deCODE BETA: -0.25  
-----  
1207:1184:1152:1121:1047:104

**GALNT16 : NP3  
Q8N428**

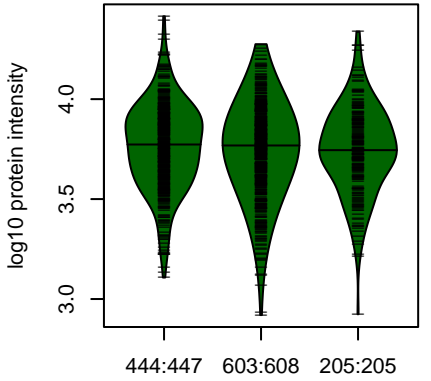

14:69793475:G:A\_G  
p = 0.39, beta = -0.0347, N = 1252

**TPVIAGGIFVIDK pc2  
Q8N428-2;Q8N428**

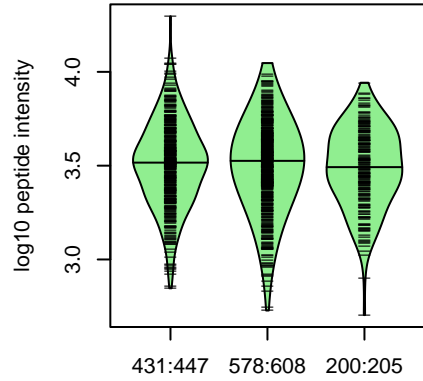

14:69793475:G:A\_G  
p = 0.19, beta = -0.0541, N = 1209

**GSGFIQHSVSGLCLETK pc3  
Q8N428**

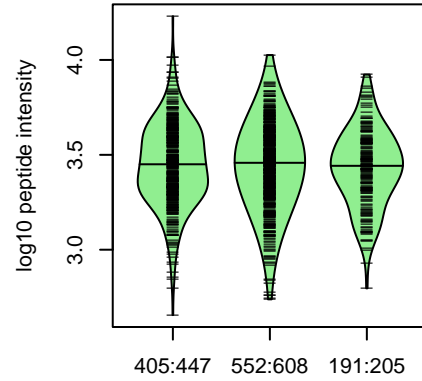

14:69793475:G:A\_G  
p = 0.28, beta = -0.0456, N = 1148

**PAQLVTSK pc2  
Q8N428**

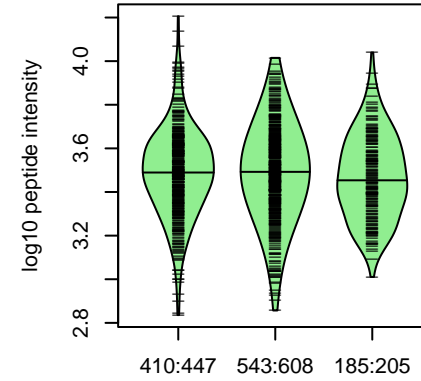

14:69793475:G:A\_G  
p = 0.44, beta = -0.0331, N = 1138

**WYLENVYPELTVPVK pc2  
Q8N428-2;Q8N428**

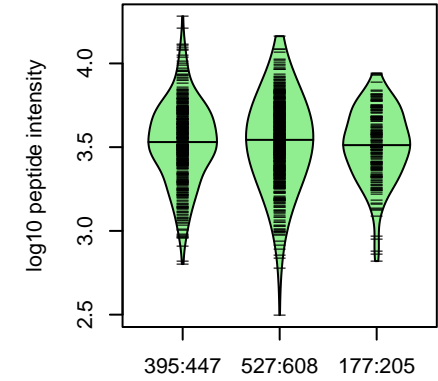

14:69793475:G:A\_G  
p = 0.56, beta = -0.0254, N = 1099

**GALNT16 : NP3  
Q8N428**

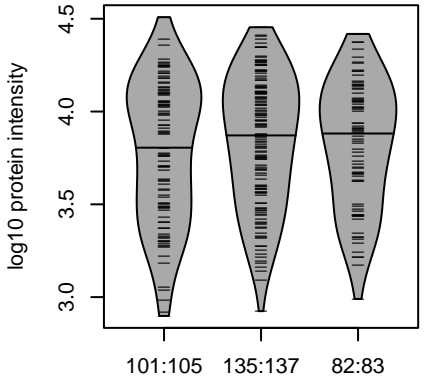

14:69793475:G:A\_A  
p = 0.88, beta = -0.0112, N = 318

**PAQLVTSK pc2  
Q8N428**

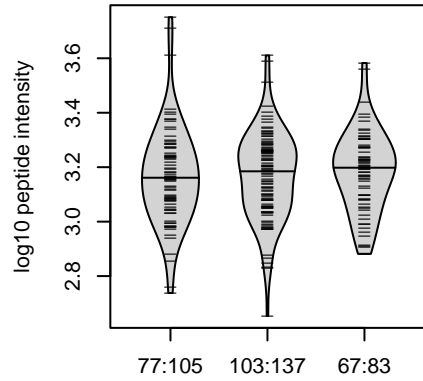

14:69793475:G:A\_A  
p = 0.94, beta = -0.00668, N = 247

**WYLENVYPELTVPVK pc2  
Q8N428-2;Q8N428**

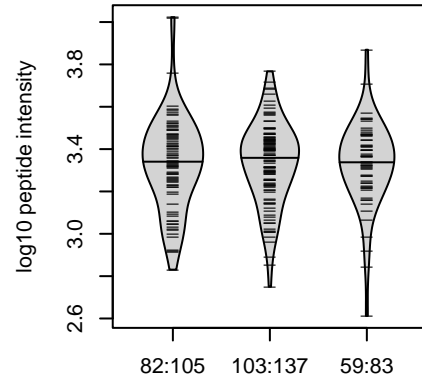

14:69793475:G:A\_A  
p = 0.44, beta = -0.0646, N = 244

**GSGFIQHSVSGLCLETK pc3  
Q8N428**

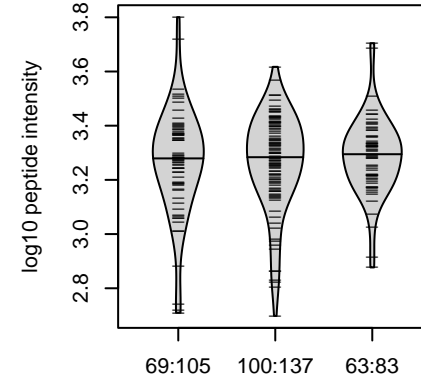

14:69793475:G:A\_A  
p = 0.97, beta = -0.00316, N = 232

**TPVIAGGIFVIDK pc2  
Q8N428-2;Q8N428**

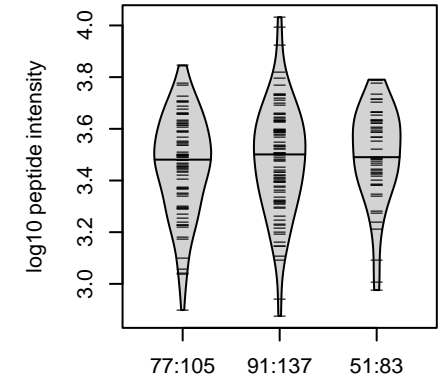

14:69793475:G:A\_A  
p = 0.56, beta = 0.0515, N = 219

Assay Target: GALNT16  
Olink UniProt: Q8N428  
deCODE rsID: rs12100668  
Proxy rsID: rs12100668  
deCODE: 14:69326758:G:A  
Proxy SNP: 14:69793475:G:A  
deCODE log10(p): 90.1  
deCODE BETA: -0.17  
-----  
1209:1148:1138:1099:1024:969



**YWHAB : NP4**  
**P31946**

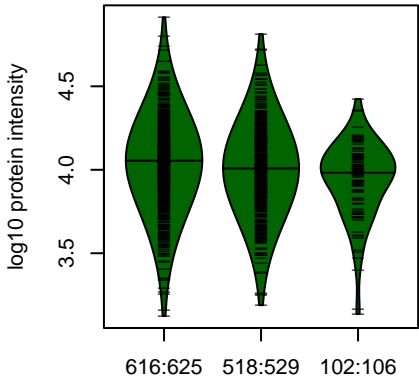

20:43514203:C:T\_T  
p = 2e-05, beta = -0.188, N = 1236

**DSTLIMQLLR pc2**

**³31947;P61981;P62258-2;P63104-2;FT1;P27348;P31947;P61981;P62258-2;**

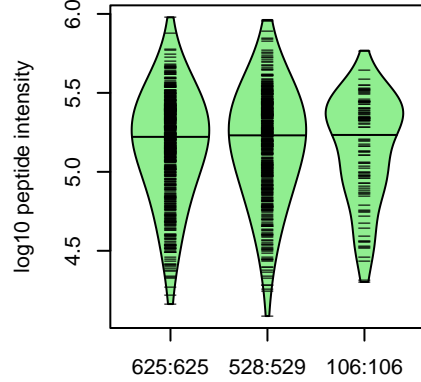

20:43514203:C:T\_T  
p = 0.83, beta = -0.00941, N = 1259

**NLLSVAYK pc2**

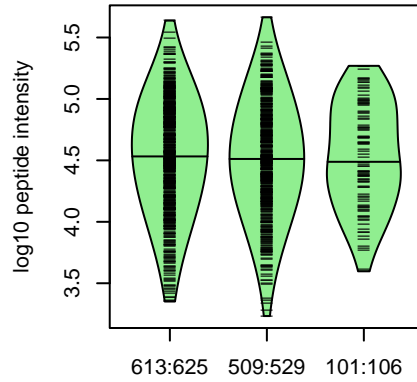

20:43514203:C:T\_T  
p = 0.51, beta = -0.0297, N = 1223

**YLIPNATQPESK pc2**  
**P31946**

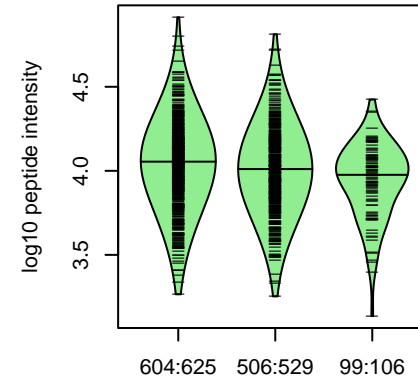

20:43514203:C:T\_T  
p = 1.2e-05, beta = -0.196, N = 1209

**AVTEQGHLSNEER pc3**  
**A0A0J9YWE8;P31946**

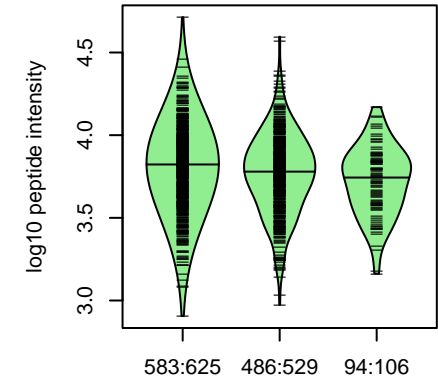

20:43514203:C:T\_T  
p = 0.00016, beta = -0.173, N = 1163

**YWHAB : NP4**  
**P31946**

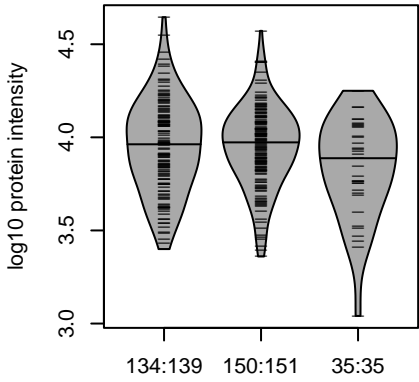

20:43514203:C:T\_T  
p = 0.12, beta = -0.129, N = 319

**DSTLIMQLLR pc2**

**³31947;P61981;P62258-2;P63104-2;FT1;P27348;P31947;P61981;P62258-2;**

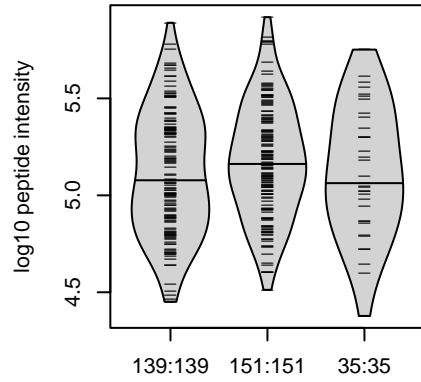

20:43514203:C:T\_T  
p = 0.38, beta = 0.0735, N = 325

**NLLSVAYK pc2**

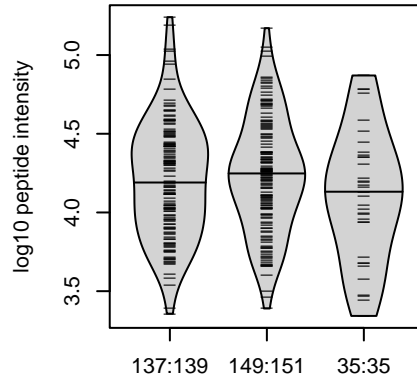

20:43514203:C:T\_T  
p = 0.3, beta = -0.086, N = 321

**YLIPNATQPESK pc2**  
**P31946**

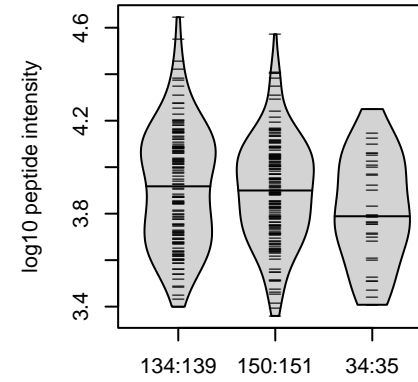

20:43514203:C:T\_T  
p = 0.13, beta = -0.128, N = 318

**YLSEVASGDNK pc2**  
**P31946**

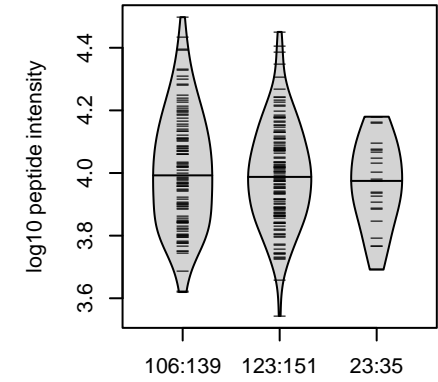

20:43514203:C:T\_T  
p = 0.42, beta = -0.0786, N = 252

Assay Target: YWHAB  
Olink UniProt: P31946  
deCODE rsID: rs6031847  
Proxy rsID: rs6031847  
deCODE: 20:44885562:T:C  
Proxy SNP: 20:43514203:C:T  
deCODE log10(p): 86.5  
deCODE BETA: -0.18  
- - - \* \* \* - - - \* \* \* - - - \* \* \* - - - \* \* \* - - - \* \* \*  
1259:1223:1209:1163:1074:101







**PRCP : NP5  
P42785**

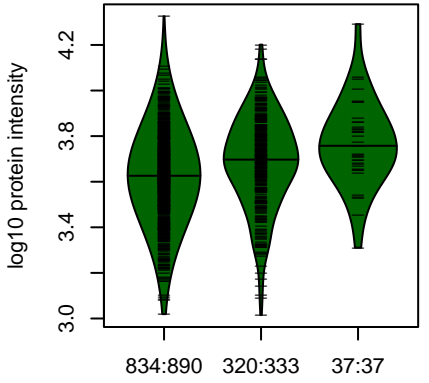

11:82564294:T:G\_G  
p = 7.2e-11, beta = 0.35, N = 1191

**NALDPMSVLLAR pc2  
I2451;B3KR26;B7Z7Q6;E9PNF7;P427**

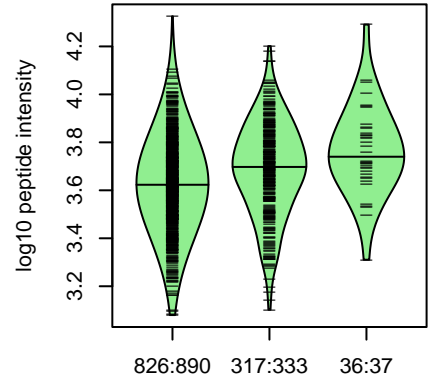

11:82564294:T:G\_G  
p = 6.1e-11, beta = 0.354, N = 1179

**DITDTLVAVTISEGAHHLDLR pc3  
I2451;B3KR26;B7Z7Q6;E9PNF7;P427**

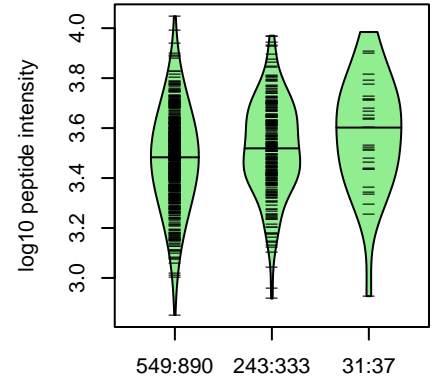

11:82564294:T:G\_G  
p = 3.9e-05, beta = 0.255, N = 823

**HLNFLTSEQALADFAELIK pc3  
I2451;B3KR26;B7Z7Q6;E9PLY4;E9PNF7;P427**

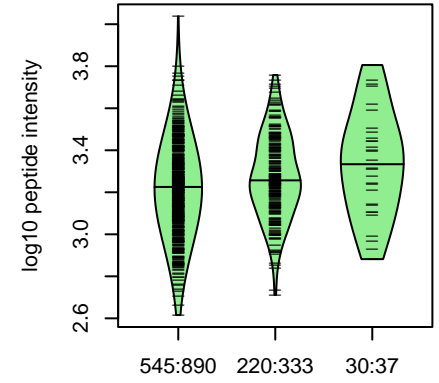

11:82564294:T:G\_G  
p = 4.4e-05, beta = 0.26, N = 795

**YYGESLPFGDNSFK pc2  
I2451;B3KR26;B7Z7Q6;E9PLY4;E9PNF7;P427**

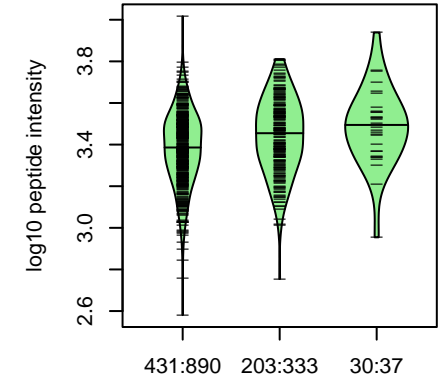

11:82564294:T:G\_G  
p = 2.8e-06, beta = 0.312, N = 664

**PRCP : NP5  
P42785**

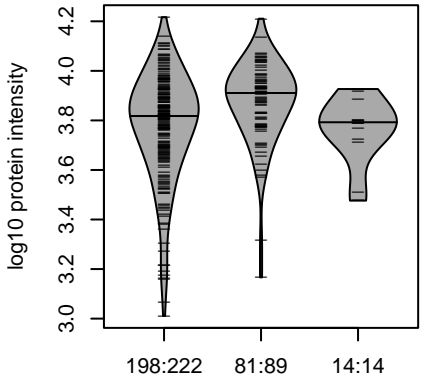

11:82564294:T:G\_G  
p = 0.067, beta = 0.184, N = 293

**NALDPMSVLLAR pc2  
I2451;B3KR26;B7Z7Q6;E9PNF7;P427**

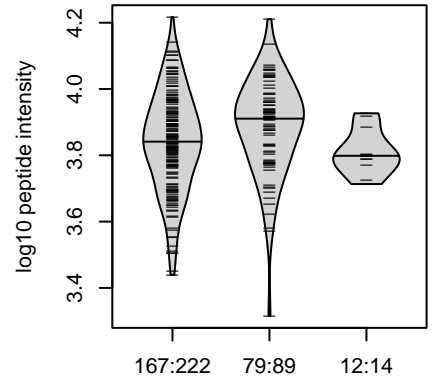

11:82564294:T:G\_G  
p = 0.36, beta = 0.0977, N = 258

**DITDTLVAVTISEGAHHLDLR pc3  
I2451;B3KR26;B7Z7Q6;E9PNF7;P427**

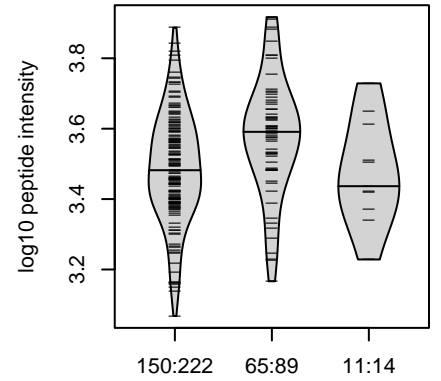

11:82564294:T:G\_G  
p = 0.02, beta = 0.263, N = 226

**YYGESLPFGDNSFK pc2  
I2451;B3KR26;B7Z7Q6;E9PLY4;E9PNF7;P427**

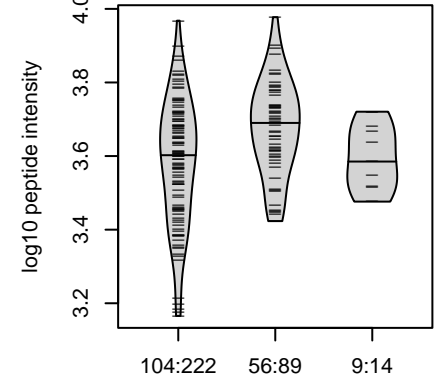

11:82564294:T:G\_G  
p = 0.011, beta = 0.318, N = 169

**HLNFLTSEQALADFAELIK pc3  
I2451;B3KR26;B7Z7Q6;E9PLY4;E9PNF7;P427**

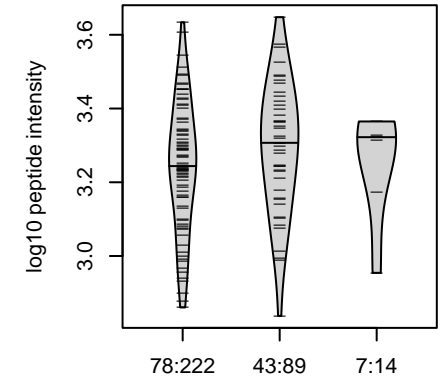

11:82564294:T:G\_G  
p = 0.38, beta = 0.128, N = 128

Assay Target: PRCP  
Olink UniProt: P42785  
deCODE rsID: rs2229437  
Proxy rsID: rs2229437  
deCODE: 11:82853252:G:T  
Proxy SNP: 11:82564294:T:G  
deCODE log10(p): 82.2  
deCODE BETA: 0.22  
\*.\*.\*.\*.-.-.-.-  
1179:823:795:664:216:87:63:39

**FIS1 : NP4  
Q9Y3D6**

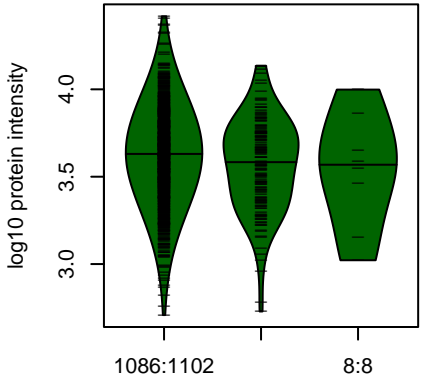

7:100896701:A:T\_T  
p = 0.0077, beta = -0.212, N = 1239

**GIVLLELLPK pc2  
Q9Y3D6**

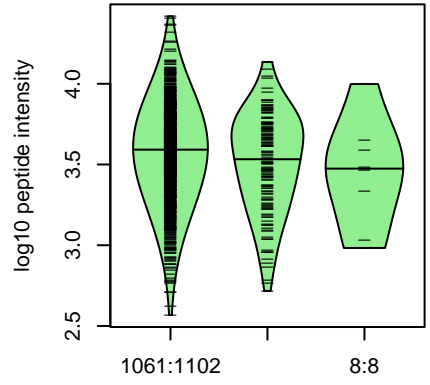

7:100896701:A:T\_T  
p = 0.0071, beta = -0.218, N = 1208

**STQFEYAWCLVR pc2  
Q9Y3D6**

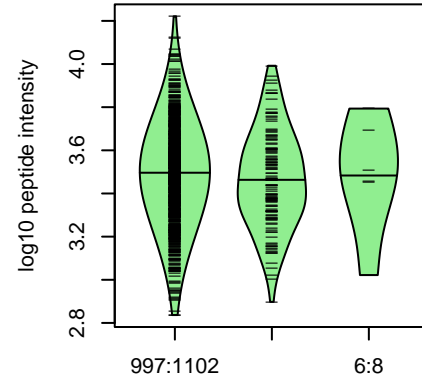

7:100896701:A:T\_T  
p = 0.18, beta = -0.113, N = 1135

**GLLQTEPQNNQAK pc2  
Q9Y3D6**

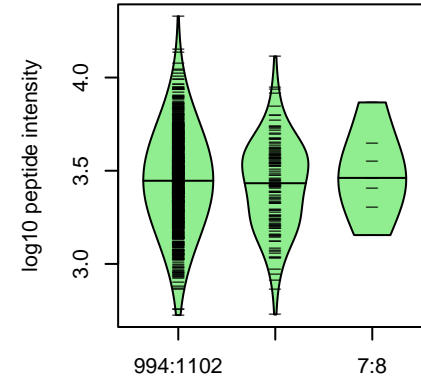

7:100896701:A:T\_T  
p = 0.33, beta = -0.0829, N = 1129

**EEQRDYVFYLA VGN YR pc3  
Q9Y3D6**

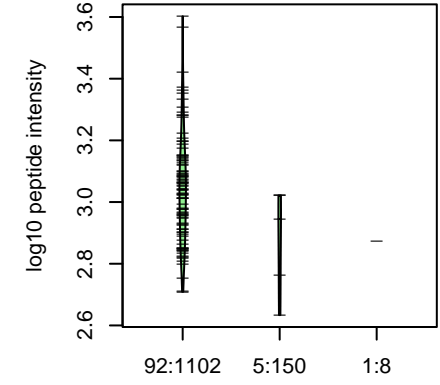

7:100896701:A:T\_T  
p = 0.041, beta = -0.673, N = 98

**FIS1 : NP4  
Q9Y3D6**

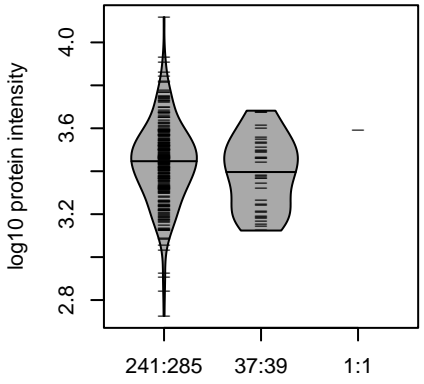

7:100896701:A:T\_T  
p = 0.22, beta = -0.201, N = 279

**GLLQTEPQNNQAK pc2  
Q9Y3D6**

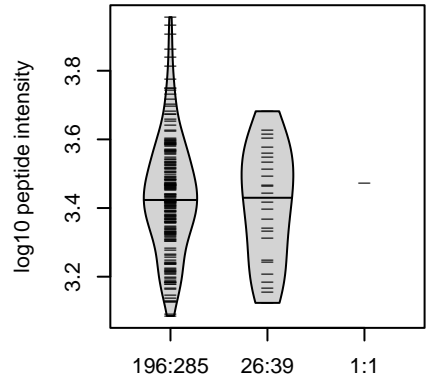

7:100896701:A:T\_T  
p = 0.44, beta = -0.149, N = 223

**GIVLLELLPK pc2  
Q9Y3D6**

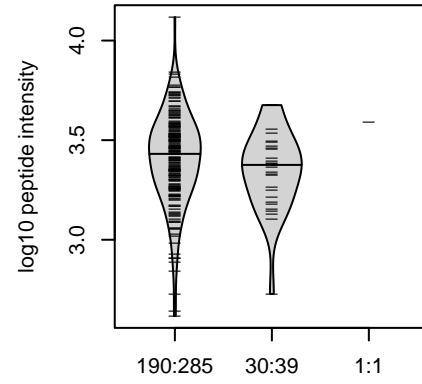

7:100896701:A:T\_T  
p = 0.5, beta = -0.122, N = 221

**STQFEYAWCLVR pc2  
Q9Y3D6**

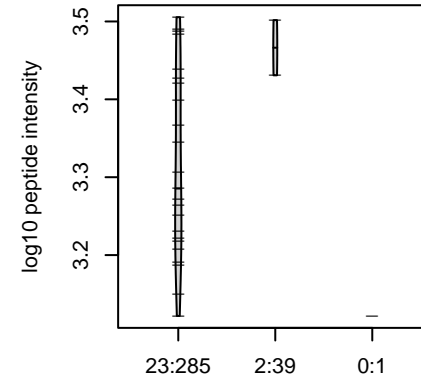

7:100896701:A:T\_T  
p = 0.7, beta = 0.268, N = 25

Assay Target: FIS1  
Olink UniProt: Q9Y3D6  
deCODE rsID: rs75487681  
Proxy rsID: rs75487681  
deCODE: 7:101253420:T:A  
Proxy SNP: 7:100896701:A:T  
deCODE log10(p): 80.3  
deCODE BETA: -0.32  
\*.-.-.-  
1208:1135:1129:98

**LGALS3BP : NP2  
Q08380**

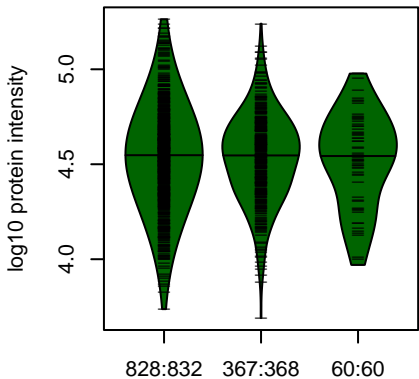

17:76971526:T:C\_C  
p = 0.52, beta = -0.0313, N = 1255

**SQLVYQSR pc2  
Q08380**

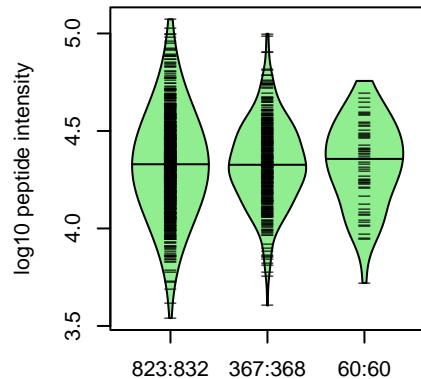

17:76971526:T:C\_C  
p = 0.91, beta = -0.00553, N = 1250

**SDLAVPSELALLK pc2  
Q08380**

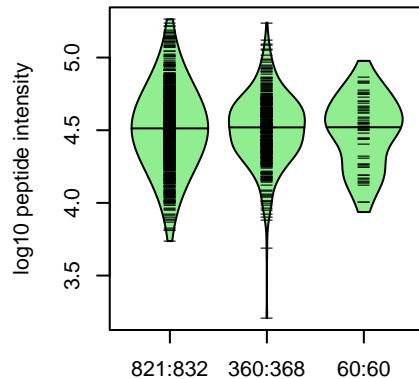

17:76971526:T:C\_C  
p = 0.38, beta = -0.0428, N = 1241

**LADGGATNQGR pc2  
ID3;K7EKQ5;K7EN99;K7EQT9;K7ERZ**

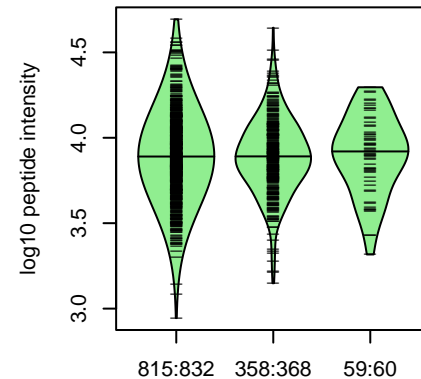

17:76971526:T:C\_C  
p = 0.99, beta = -4e-04, N = 1232

**ELSEALGQIFDSQR pc2  
K7EKQ5;Q08380**

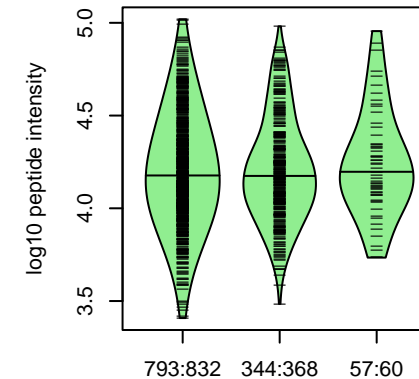

17:76971526:T:C\_C  
p = 0.99, beta = 0.000779, N = 1194

**LGALS3BP : NP2  
Q08380**

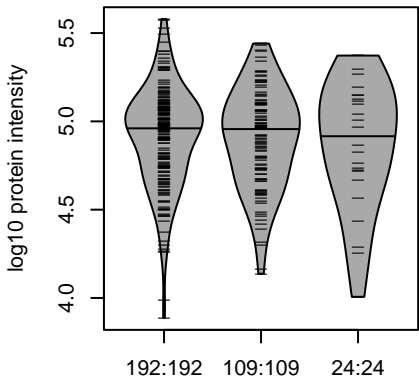

17:76971526:T:C\_C  
p = 0.85, beta = 0.0168, N = 325

**ASHEEVEGLVEK pc3  
Q08380**

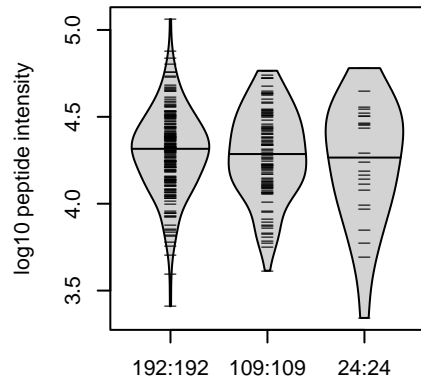

17:76971526:T:C\_C  
p = 0.99, beta = 0.00131, N = 325

**ELSEALGQIFDSQR pc2  
K7EKQ5;Q08380**

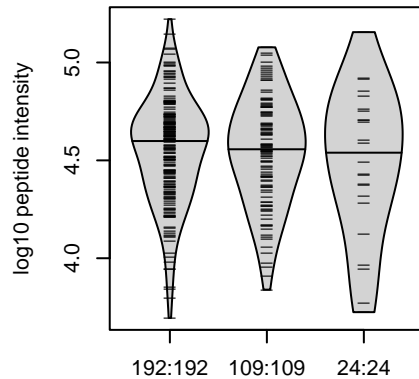

17:76971526:T:C\_C  
p = 0.64, beta = 0.0409, N = 325

**SDLAVPSELALLK pc2  
Q08380**

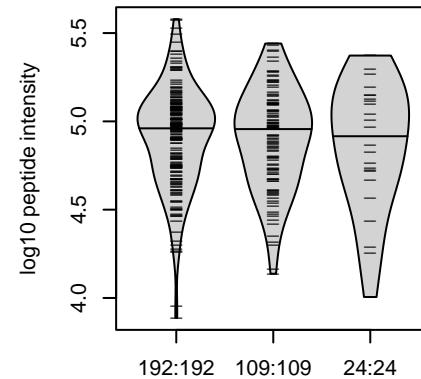

17:76971526:T:C\_C  
p = 0.83, beta = 0.0184, N = 325

**SQLVYQSR pc2  
Q08380**

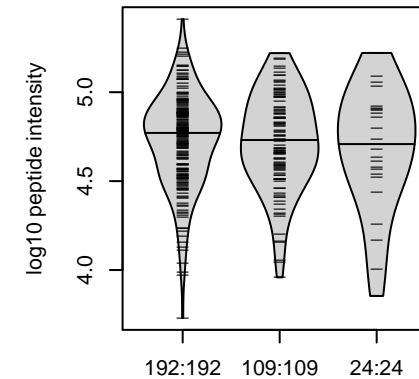

17:76971526:T:C\_C  
p = 0.64, beta = 0.0405, N = 325

Assay Target: LGALS3BP  
Olink UniProt: Q08380  
deCODE rsID: rs3826311  
Proxy rsID: rs3826311  
deCODE: 17:78975444:C:T  
Proxy SNP: 17:76971526:T:C  
deCODE log10(p): 80.3  
deCODE BETA: 0.2  
-----  
1250:1241:1232:1194:1169:113



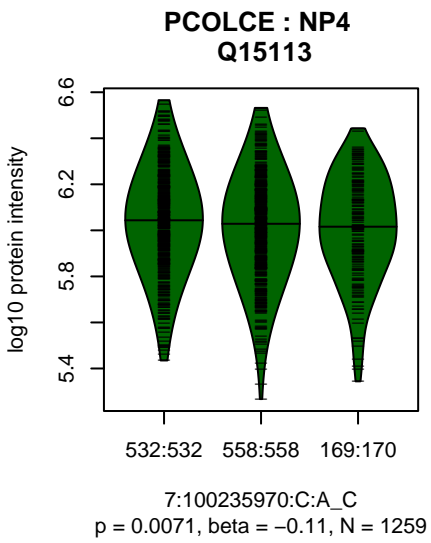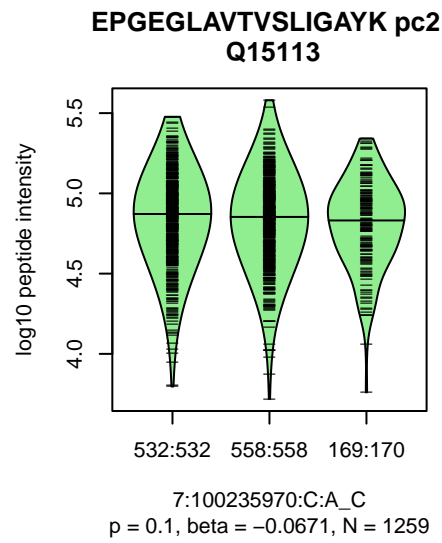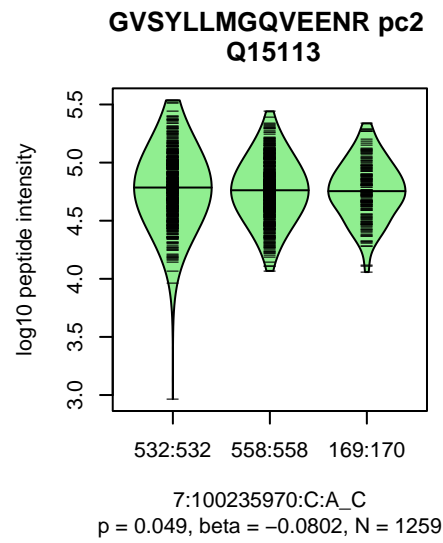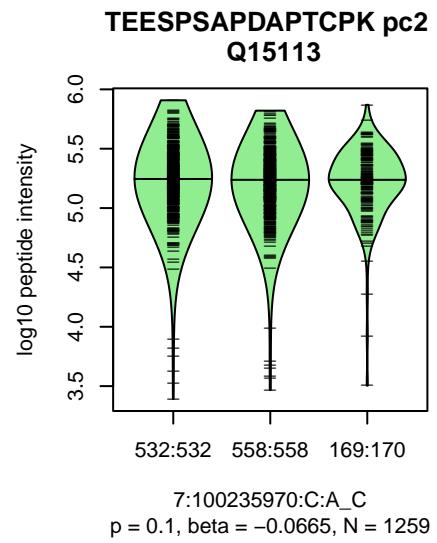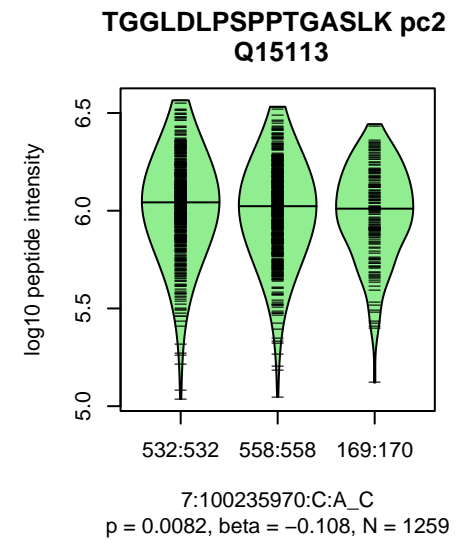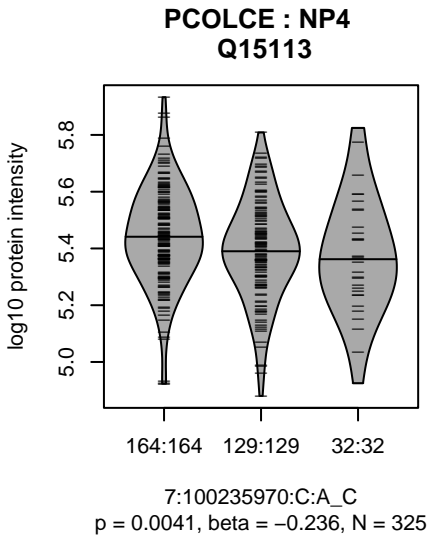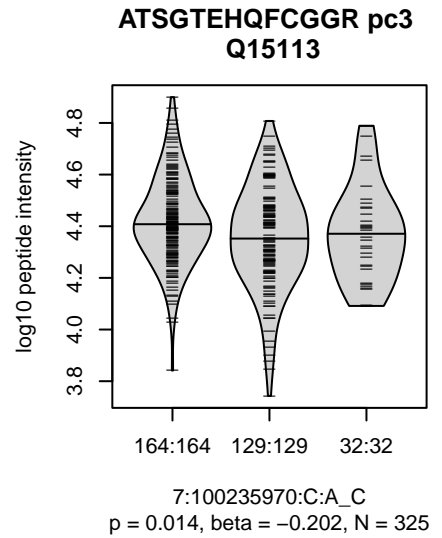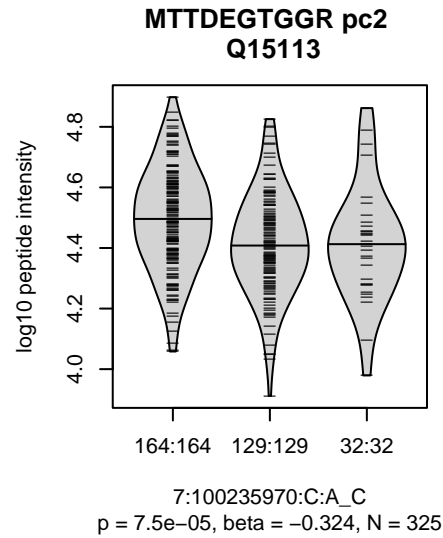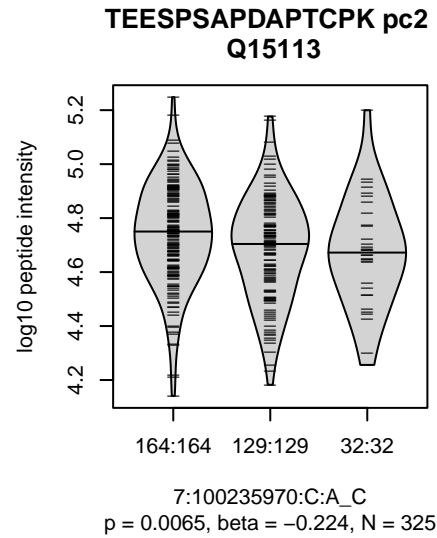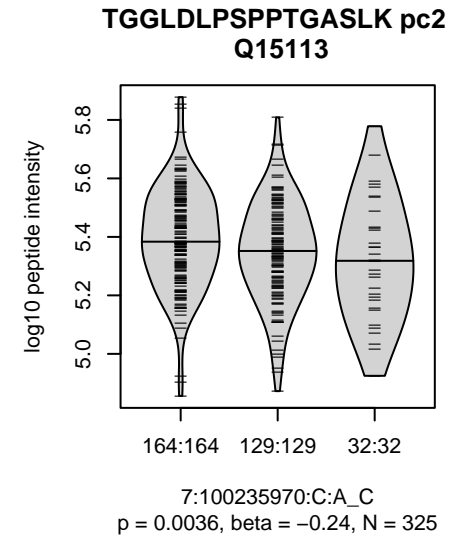

Assay Target: PCOLCE  
 Olink UniProt: Q15113  
 deCODE rsID: rs7385804  
 Proxy rsID: rs7385804  
 deCODE: 7:100638347:C:A  
 Proxy SNP: 7:100235970:C:A  
 deCODE log10(p): 77.9  
 deCODE BETA: -0.16  
 - - - - - \* \* \* - - - - -  
 1259:1259:1259:1259:1259:125







**ANXA11 : NP1**  
**P50995;P50995-2**

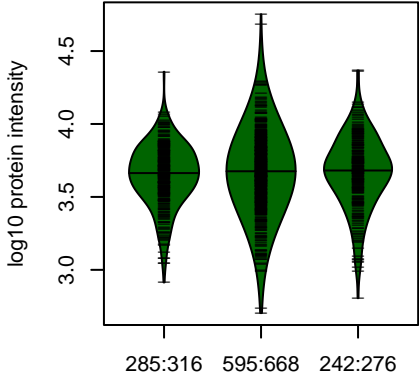

10:81906384:G:T\_T  
p = 0.37, beta = 0.0387, N = 1122

**TPVLFDIYEIK pc2**  
**P50995-2;P50995**

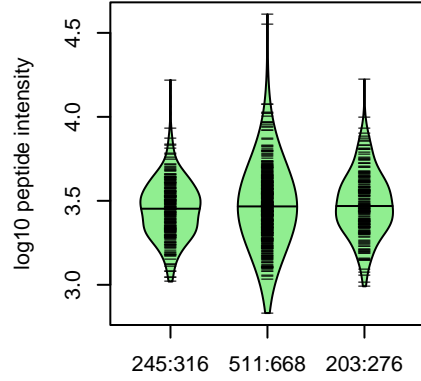

10:81906384:G:T\_T  
p = 0.13, beta = 0.0712, N = 959

**NTPAFFAER pc2**  
**P50995-2;P50995**

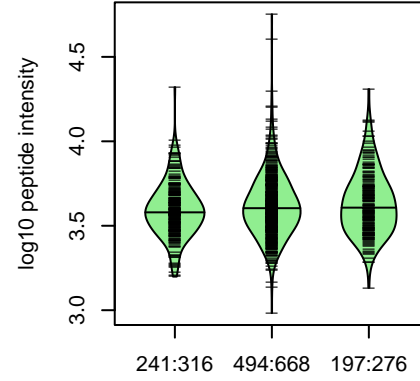

10:81906384:G:T\_T  
p = 0.055, beta = 0.0915, N = 932

**SETDLLDIR pc2**  
**P50995-2;P50995**

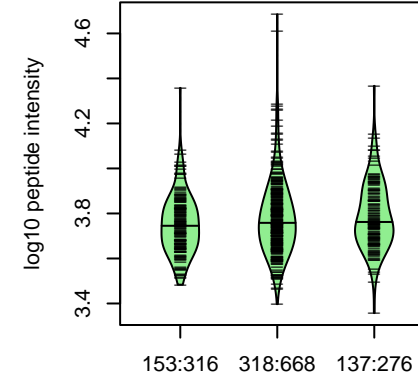

10:81906384:G:T\_T  
p = 0.077, beta = 0.103, N = 608

**GVGTEACLIEILASR pc2**  
**P50995-2;P50995**

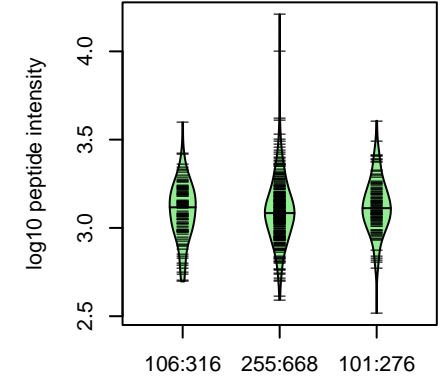

10:81906384:G:T\_T  
p = 0.33, beta = 0.0674, N = 462

**ANXA11 : NP1**  
**P50995;P50995-2**

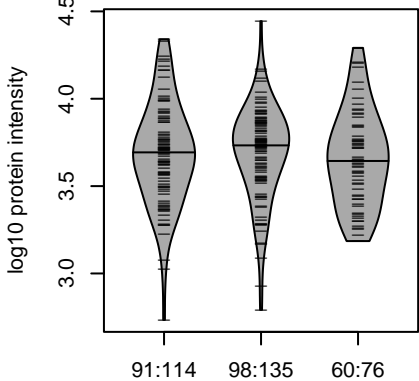

10:81906384:G:T\_T  
p = 0.88, beta = -0.0124, N = 249

**TPVLFDIYEIK pc2**  
**P50995-2;P50995**

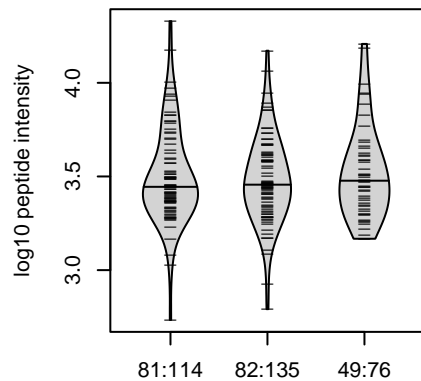

10:81906384:G:T\_T  
p = 0.46, beta = 0.065, N = 212

**NTPAFFAER pc2**  
**P50995-2;P50995**

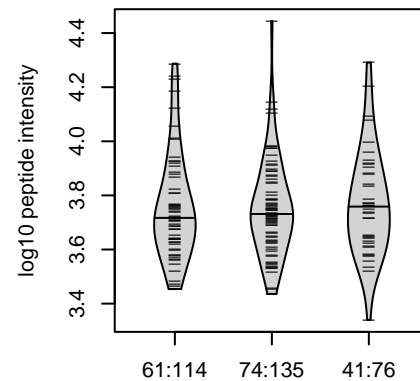

10:81906384:G:T\_T  
p = 0.4, beta = 0.0826, N = 176

**QQILLSFK pc2**  
**P50995-2;P50995**

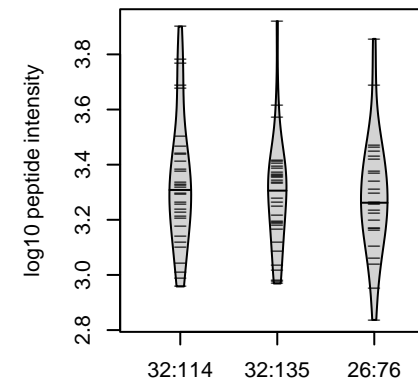

10:81906384:G:T\_T  
p = 0.59, beta = -0.0691, N = 90

**SETDLLDIR pc2**  
**P50995-2;P50995**

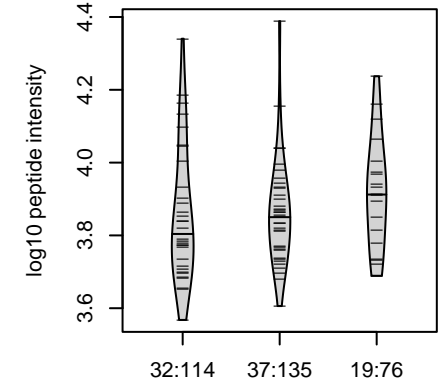

10:81906384:G:T\_T  
p = 0.1, beta = 0.225, N = 88

**GFGTDEQAIIIDCLGSR pc2**  
**rs1049550 REF**

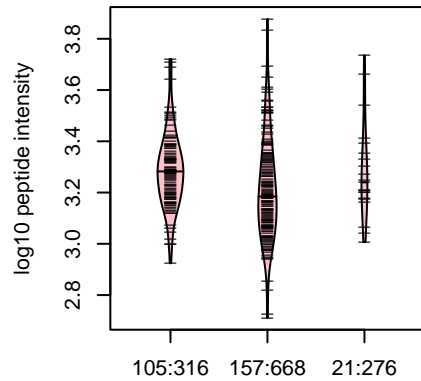

10:81906384:G:T\_T  
p = 5.1e-13, model = DOM, N = 283

Assay Target: ANXA11  
Olink UniProt: P50995  
deCODE rsID: rs2152546  
Proxy rsID: rs2152546  
deCODE: 10:80146628:T:G  
Proxy SNP: 10:81906384:G:T  
deCODE log10(p): 75.8  
deCODE BETA: -0.15  
-----  
959:932:608:462:427:401:378:2

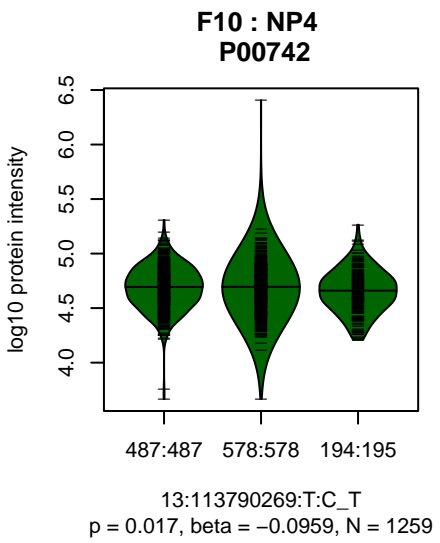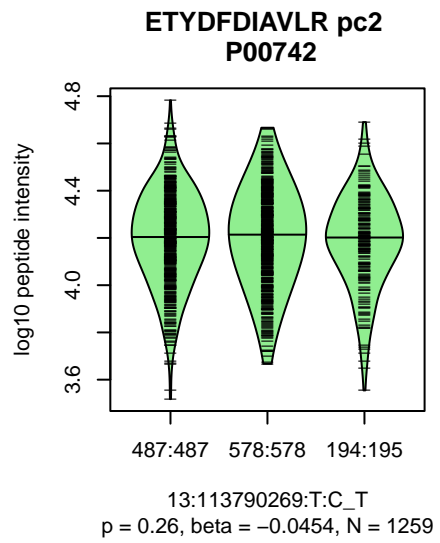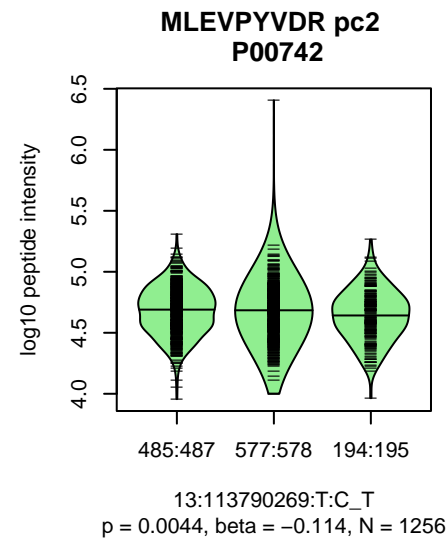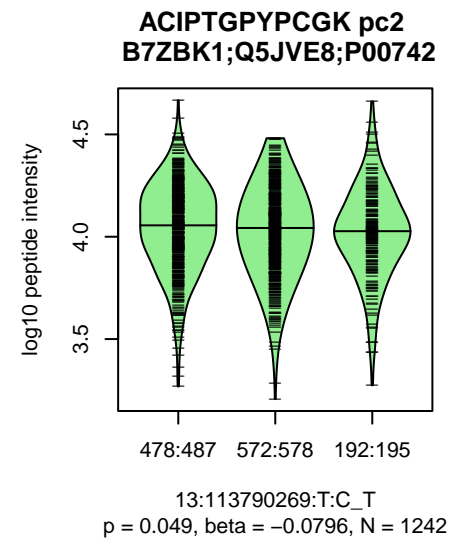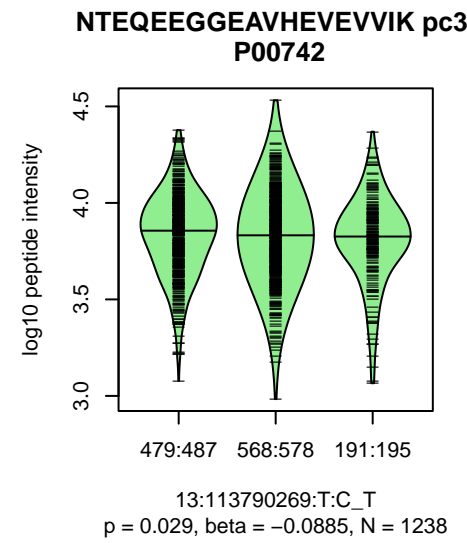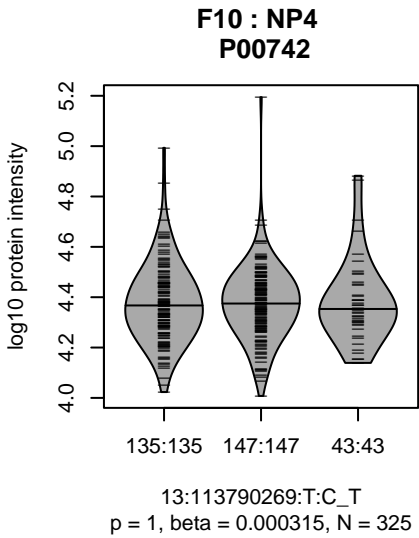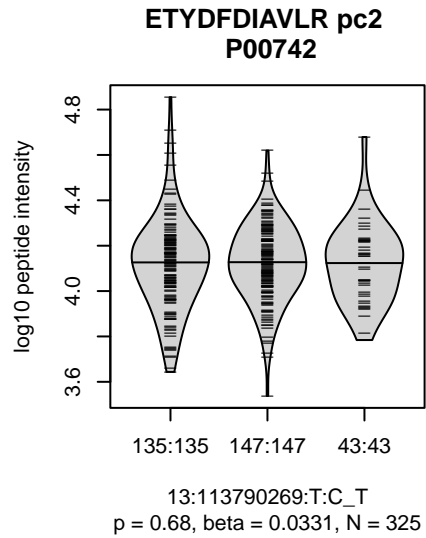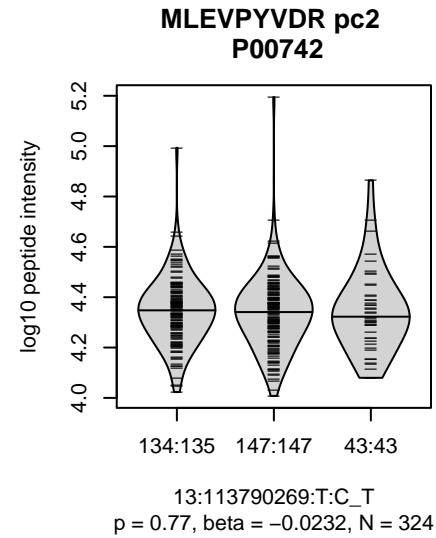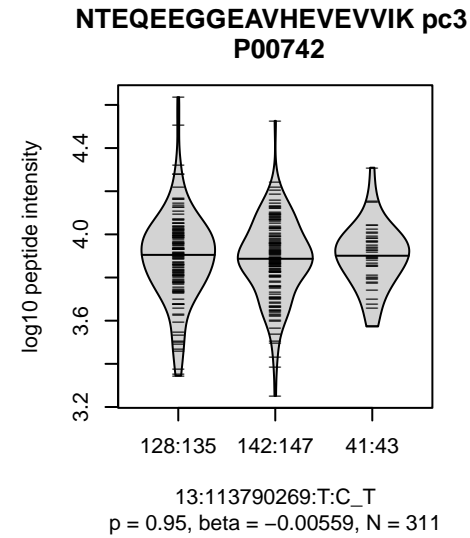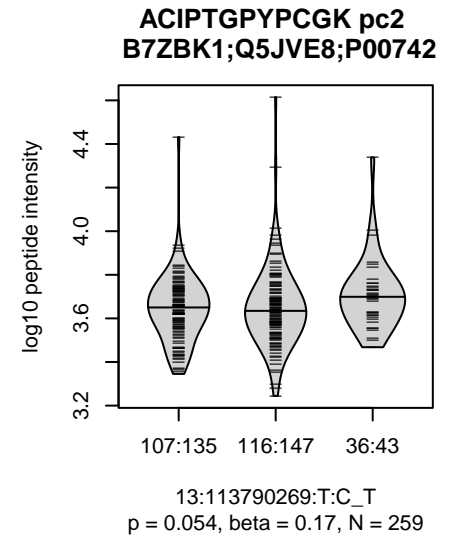

Assay Target: F10  
 Olink UniProt: P00742  
 deCODE rsID: rs3211757  
 Proxy rsID: rs3211757  
 deCODE: 13:113135954!:AC  
 Proxy SNP: 13:113790269:T:C  
 deCODE log10(p): 75  
 deCODE BETA: -0.16  
 -\*:-----:NA  
 1259:1256:1242:1238:1216:106



**RNASE2 : NP1  
P10153**

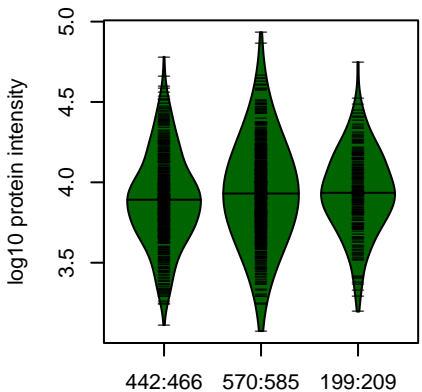

14:21359808:C:A\_A  
 $p = 0.013$ ,  $\beta = 0.102$ ,  $N = 1211$

**RDPPQYPVVPVHLDR pc3  
P10153**

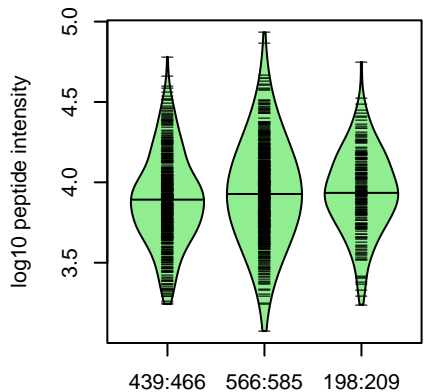

14:21359808:C:A\_A  
 $p = 0.017$ ,  $\beta = 0.0976$ ,  $N = 1203$

**YAQTPANMFYIVACDNR pc3  
P10153**

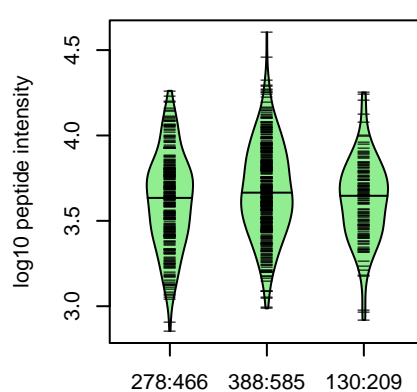

14:21359808:C:A\_A  
 $p = 0.49$ ,  $\beta = 0.0348$ ,  $N = 796$

**RNASE2 : NP1  
P10153**

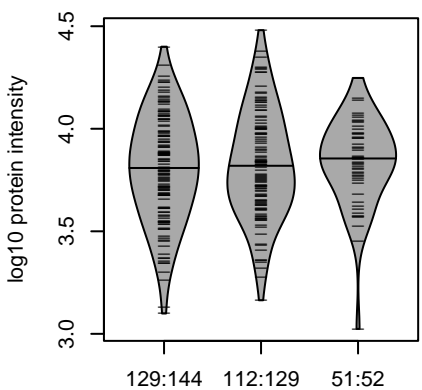

14:21359808:C:A\_A  
 $p = 0.5$ ,  $\beta = 0.0526$ ,  $N = 292$

**RDPPQYPVVPVHLDR pc3  
P10153**

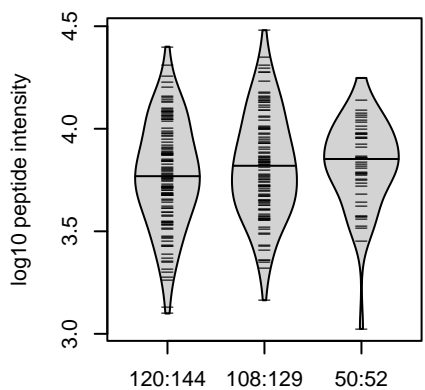

14:21359808:C:A\_A  
 $p = 0.19$ ,  $\beta = 0.106$ ,  $N = 278$

Assay Target: RNASE2  
Olink UniProt: P10153  
deCODE rsID: rs2233859  
Proxy rsID: rs2233859  
deCODE: 14:20891649:A:C  
Proxy SNP: 14:21359808:C:A  
deCODE  $\log_{10}(p)$ : 73.8  
deCODE BETA: 0.14  
-:-:-  
1203:862:796

**MAPRE2 : NP1**  
Q15555-3

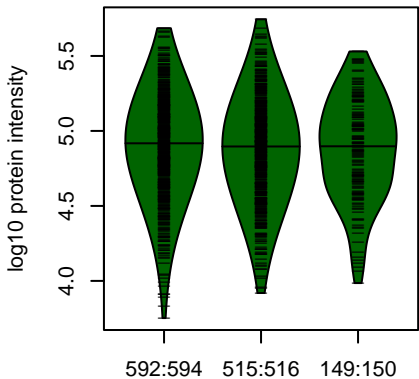

18:32720189:A:G\_G  
p = 0.3, beta = -0.0422, N = 1256

**DLETQVIQLNEQVHSLK pc3**  
Q15555-3;Q15555-4;Q15555-5;Q15555-6

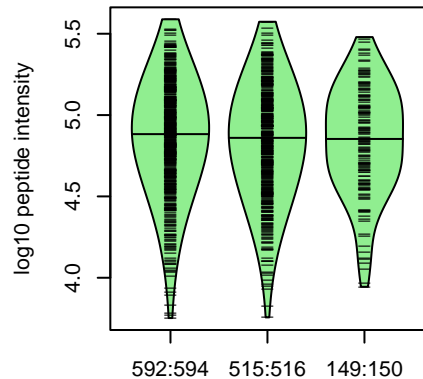

18:32720189:A:G\_G  
p = 0.3, beta = -0.043, N = 1256

**LREIELLCCQEHGQENDDLVQR pc4**  
Q15555-3;Q15555-4;Q15555-5;Q15555-2;Q15555-3;Q15555-4;Q15555-5

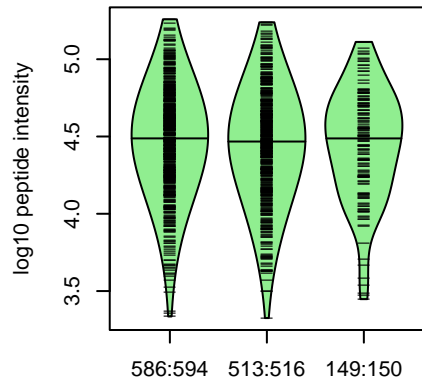

18:32720189:A:G\_G  
p = 0.21, beta = -0.0513, N = 1248

**FYDANYDGK pc2**

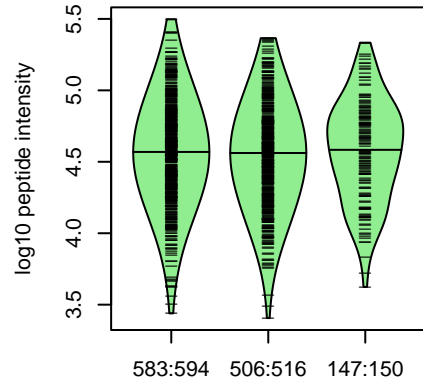

18:32720189:A:G\_G  
p = 0.68, beta = -0.0171, N = 1236

**EYDPVEAR pc2**

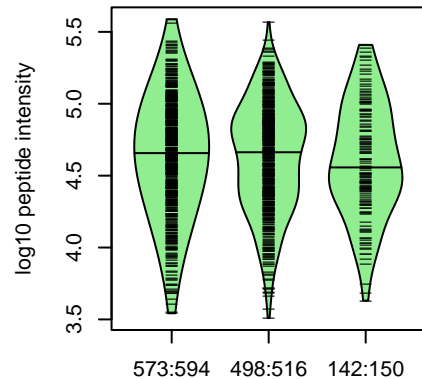

18:32720189:A:G\_G  
p = 0.42, beta = -0.034, N = 1213

**MAPRE2 : NP1**  
Q15555;Q15555-3;Q15555-5

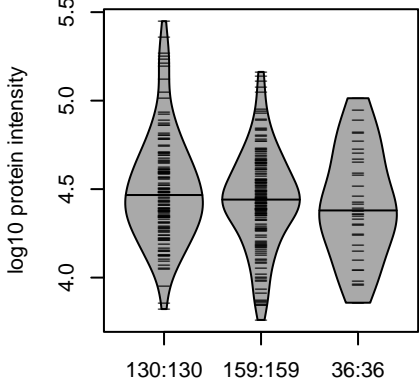

18:32720189:A:G\_G  
p = 0.016, beta = -0.201, N = 325

**EYDPVEAR pc2**  
555-2;Q15555-3;Q15555-4;Q15555-5

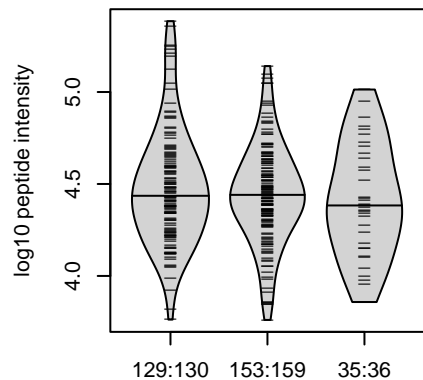

18:32720189:A:G\_G  
p = 0.043, beta = -0.171, N = 317

**LREIELLCCQEHGQENDDLVQR pc4**  
Q15555-3;Q15555-4;Q15555-5;Q15555-2;Q15555-3;Q15555-4;Q15555-5

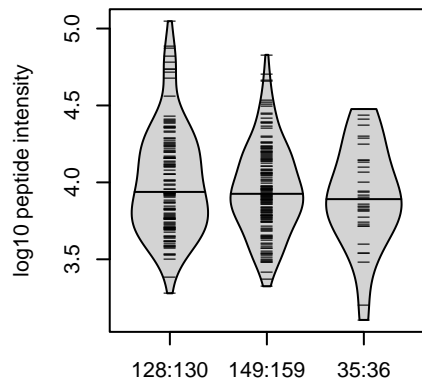

18:32720189:A:G\_G  
p = 0.053, beta = -0.164, N = 312

**FYDANYDGK pc2**

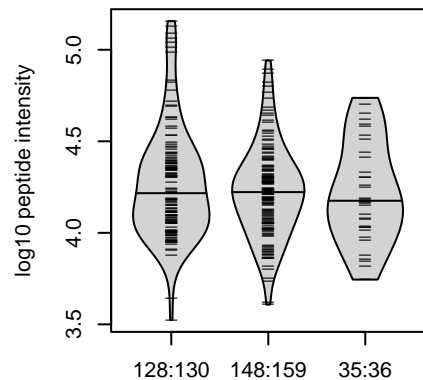

18:32720189:A:G\_G  
p = 0.089, beta = -0.144, N = 311

**LALEGVEK pc2**  
Q15555-3;Q15555-4;Q15555-5;Q15555-2

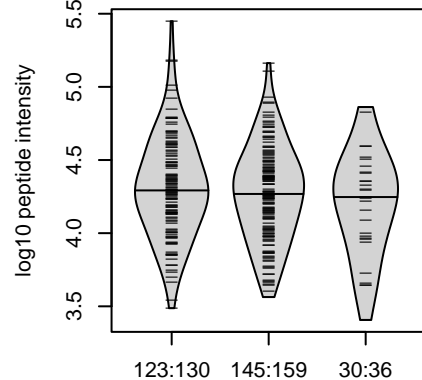

18:32720189:A:G\_G  
p = 0.093, beta = -0.149, N = 298

Assay Target: MAPRE2  
Olink UniProt: Q15555  
deCODE rsID: rs3786314  
Proxy rsID: rs3786314  
deCODE: 18:35140225:G:A  
Proxy SNP: 18:32720189:A:G  
deCODE log10(p): 72.9  
deCODE BETA: -0.15  
-----  
1256:1248:1236:1213:1209:120

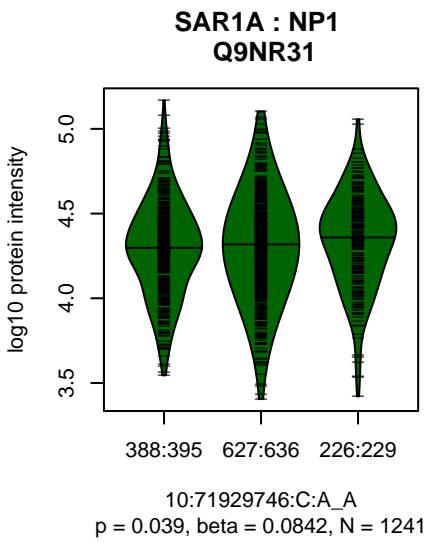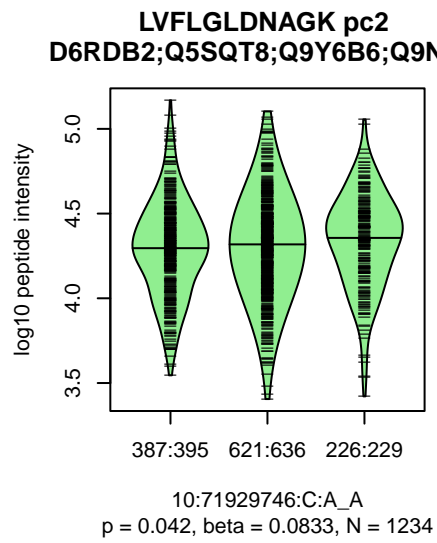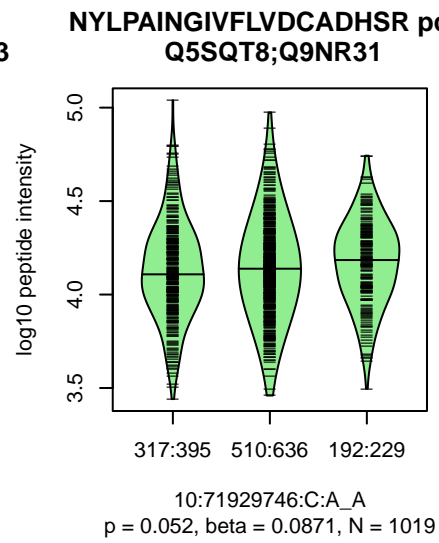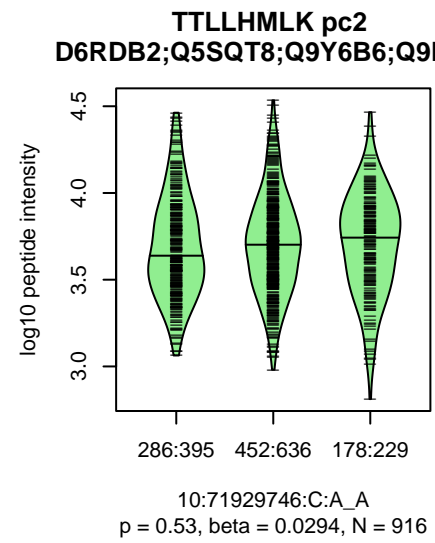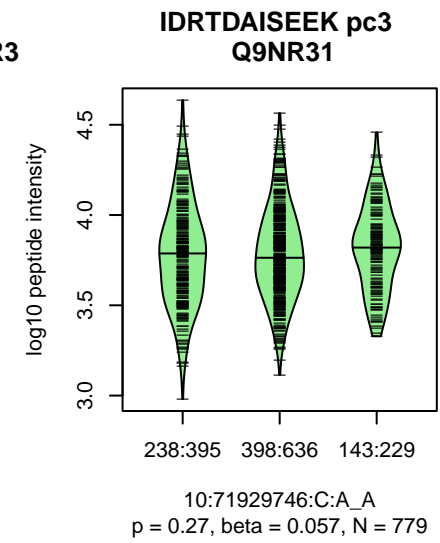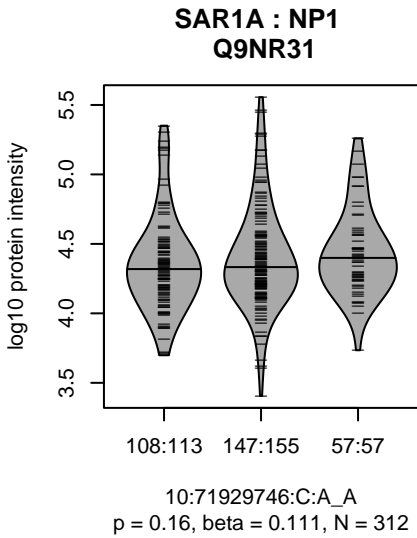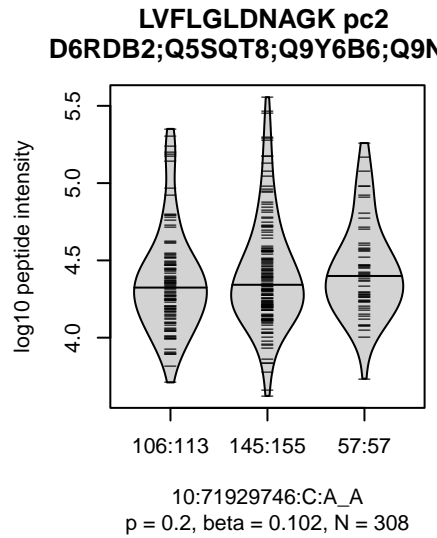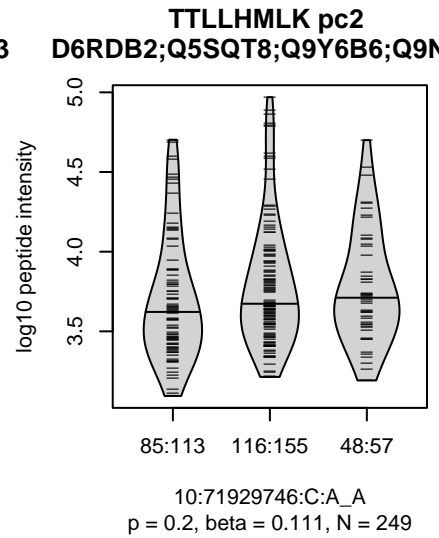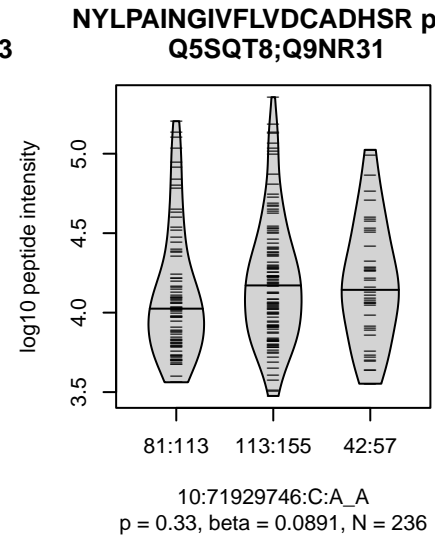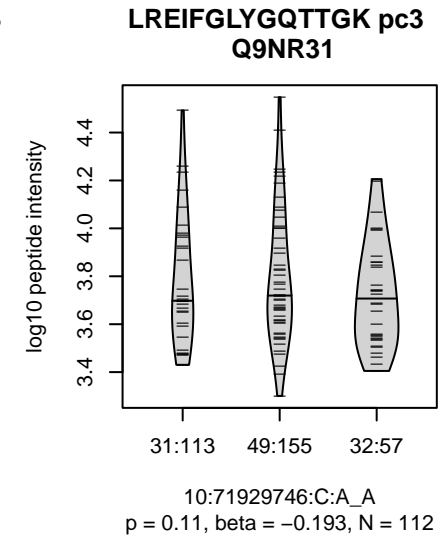

Assay Target: SAR1A  
 Olink UniProt: Q9NR31  
 deCODE rsID: rs870801  
 Proxy rsID: rs870801  
 deCODE: 10:70169990:A:C  
 Proxy SNP: 10:71929746:C:A  
 deCODE log10(p): 72.2  
 deCODE BETA: 0.15  
 - - - - -  
 1234:1019:916:779:502:470:386

**HAGH : NP3  
Q16775**

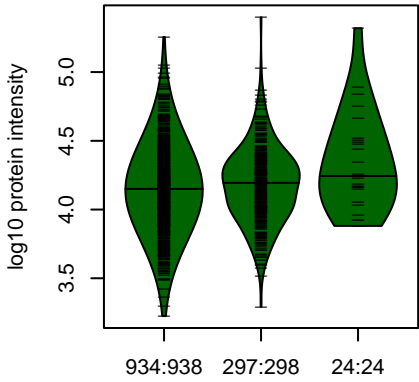

16:1879423:C:T\_T  
p = 0.0074, beta = 0.154, N = 1255

**ITHLSTLQVGS LN VK pc3  
H3BPQ4;Q16775;Q16775-2**

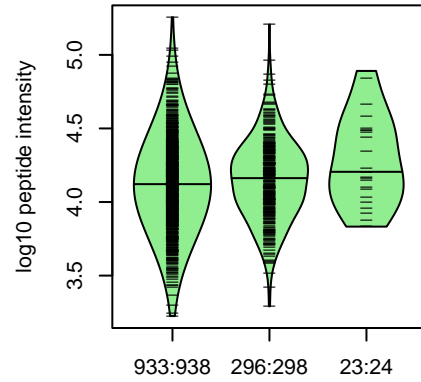

16:1879423:C:T\_T  
p = 0.018, beta = 0.138, N = 1252

**HVEPGNAAIR pc2  
H3BPQ4;Q16775;Q16775-2**

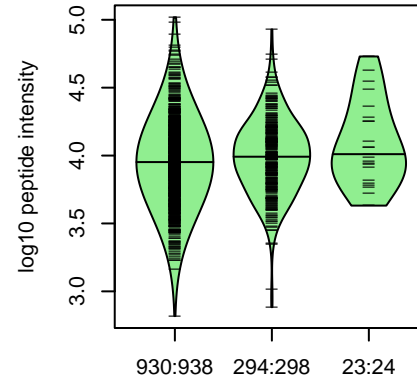

16:1879423:C:T\_T  
p = 0.01, beta = 0.149, N = 1247

**TVQQHAGETDPVTTMR pc3  
Q16775;Q16775-2**

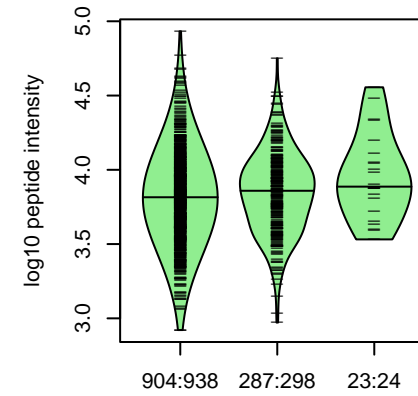

16:1879423:C:T\_T  
p = 0.03, beta = 0.127, N = 1214

**ALLEVLGR pc2  
H3BPQ4;Q16775;Q16775-2**

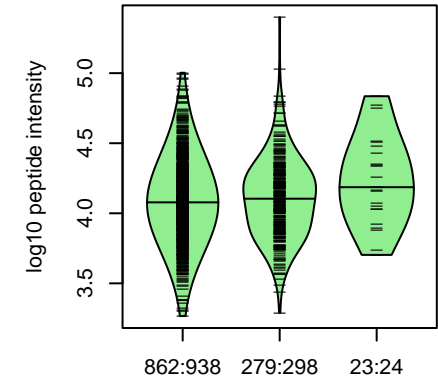

16:1879423:C:T\_T  
p = 0.061, beta = 0.111, N = 1164

**HAGH : NP3  
Q16775**

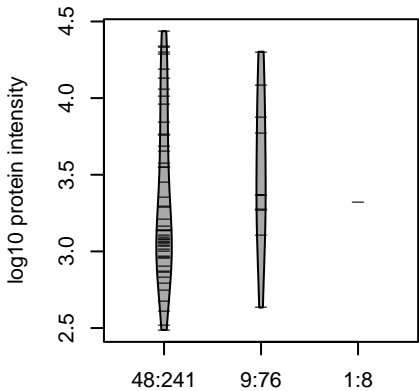

16:1879423:C:T\_T  
p = 0.42, beta = 0.232, N = 58

**ITHLSTLQVGS LN VK pc3  
H3BPQ4;Q16775;Q16775-2**

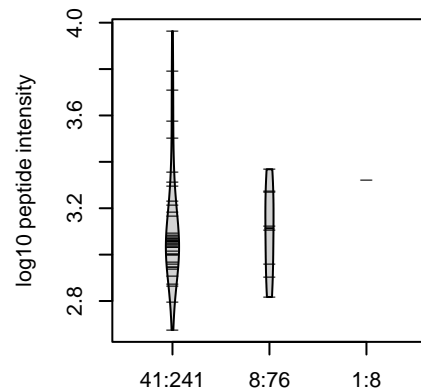

16:1879423:C:T\_T  
p = 0.55, beta = 0.179, N = 50

**TVQQHAGETDPVTTMR pc3  
Q16775;Q16775-2**

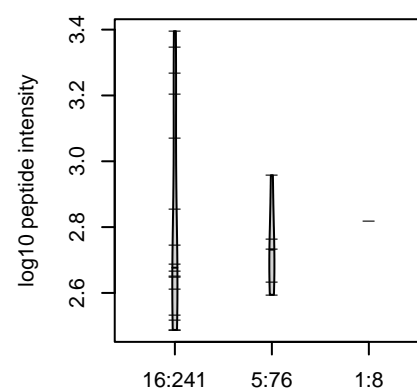

16:1879423:C:T\_T  
p = 0.65, beta = -0.163, N = 22

Assay Target: HAGH  
Olink UniProt: Q16775  
deCODE rsID: rs116869551  
Proxy rsID: rs7185299  
deCODE: 16:1826618:T:C  
Proxy SNP: 16:1879423:C:T  
deCODE log10(p): 72.2  
deCODE BETA: 0.21  
-----NA:NA:NA  
1252:1247:1214:1164:988:798:3





**HHIP : NP4  
Q96QV1**

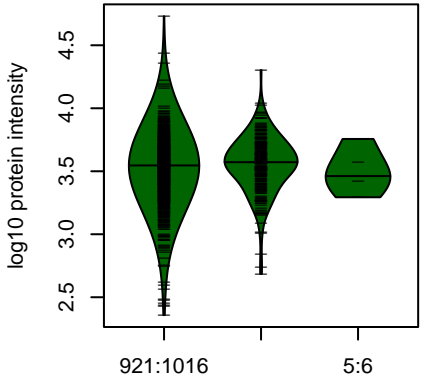

4:145659064:T:C\_C  
p = 0.053, beta = 0.138, N = 1150

**ILTPEGEIFK pc2  
Q96QV1;Q96QV1-2**

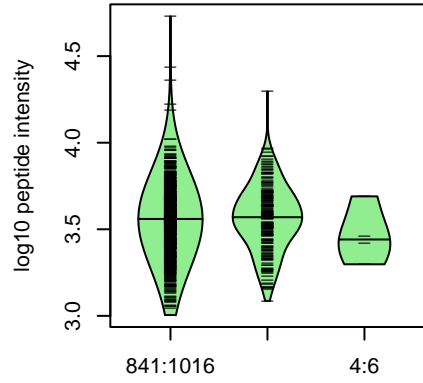

4:145659064:T:C\_C  
p = 0.33, beta = 0.0717, N = 1058

**VFLEVAELHR pc3  
Q96QV1**

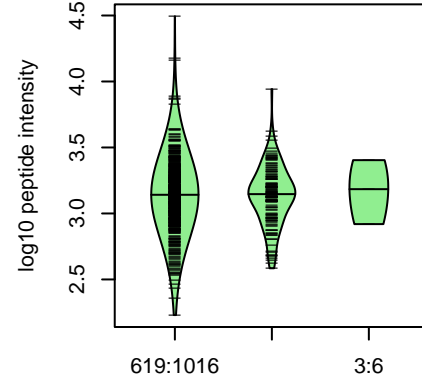

4:145659064:T:C\_C  
p = 0.73, beta = 0.0311, N = 766

**PLCLGTSGSCR pc2  
Q96QV1**

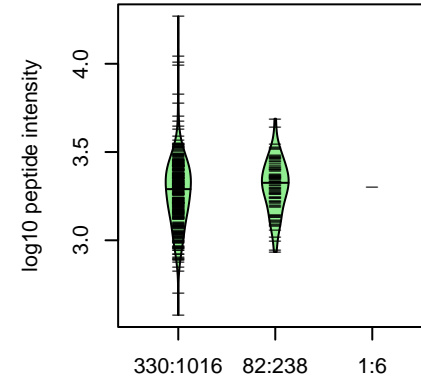

4:145659064:T:C\_C  
p = 0.2, beta = 0.154, N = 413

**ATVQPAQTLTSECSR pc2  
Q96QV1**

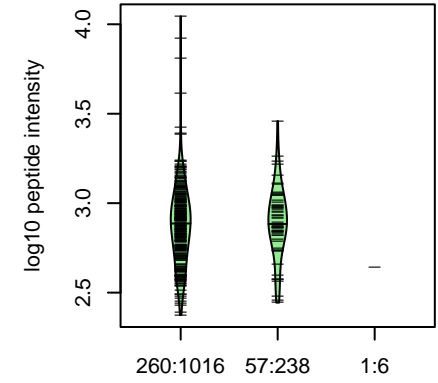

4:145659064:T:C\_C  
p = 0.45, beta = 0.106, N = 318

Assay Target: HHIP  
Olink UniProt: Q96QV1  
deCODE rsID: rs11727676  
Proxy rsID: rs11727676  
deCODE: 4:144737912:C:T  
Proxy SNP: 4:145659064:T:C  
deCODE log10(p): 69.3  
deCODE BETA: 0.24  
-----  
1058:766:413:318:268:236:222:

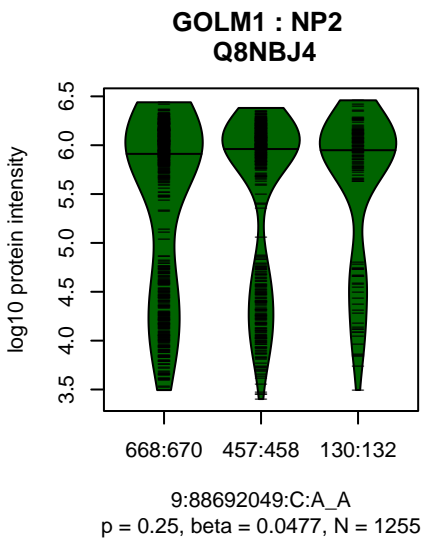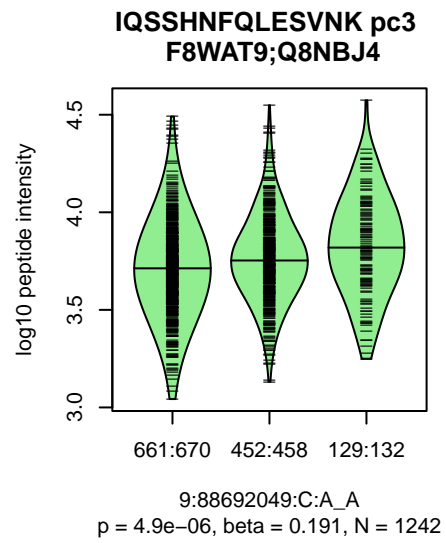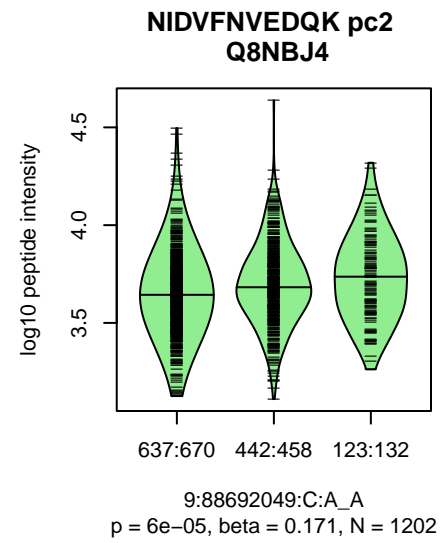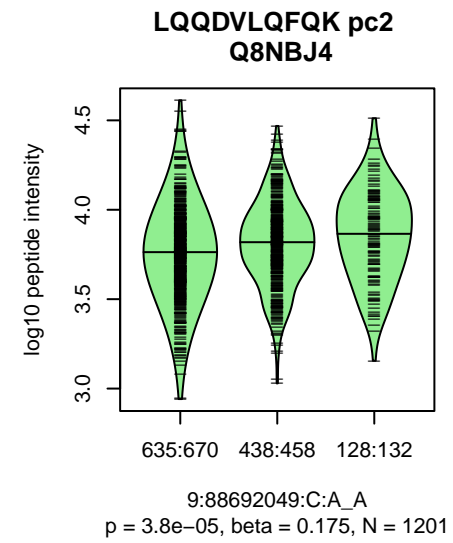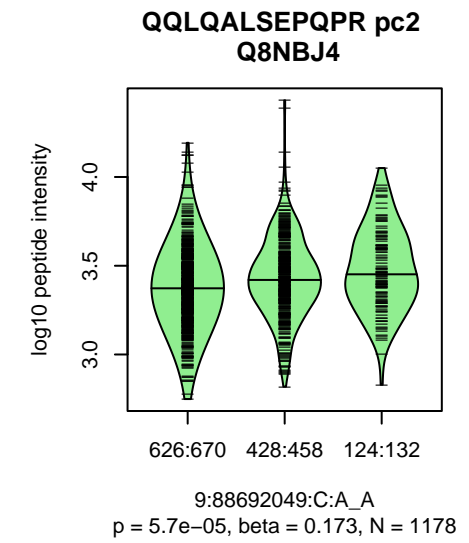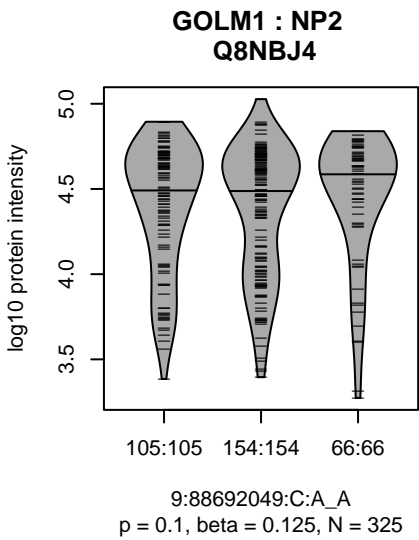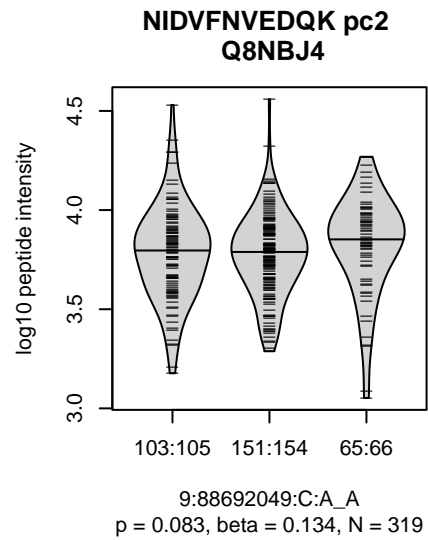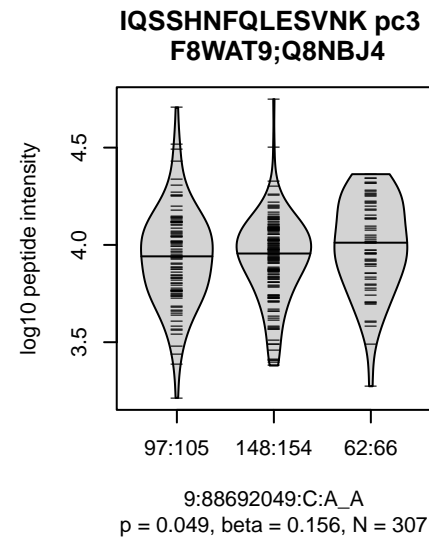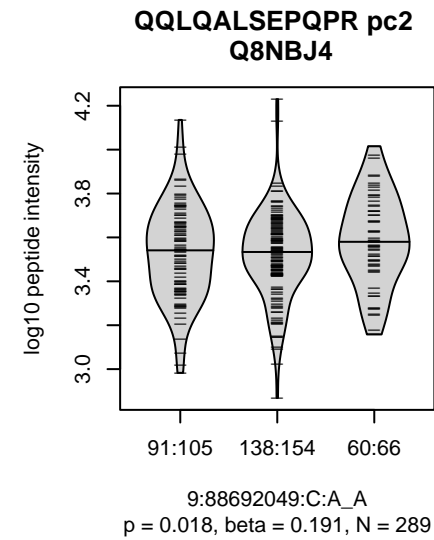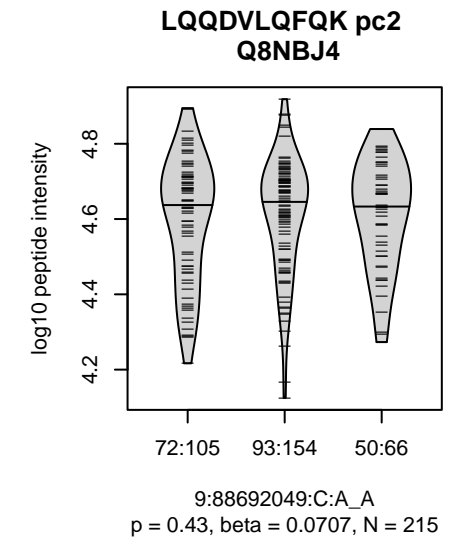

Assay Target: GOLM1  
 Olink UniProt: Q8NBJ4  
 deCODE rsID: rs4333693  
 Proxy rsID: rs4333693  
 deCODE: 9:86077134:A:C  
 Proxy SNP: 9:88692049:C:A  
 deCODE log10(p): 68.7  
 deCODE BETA: 0.18  
 \*.\*.\*.\*.\*.-:.\*.\*.\*.-:NA  
 1242:1202:1201:1178:1081:950

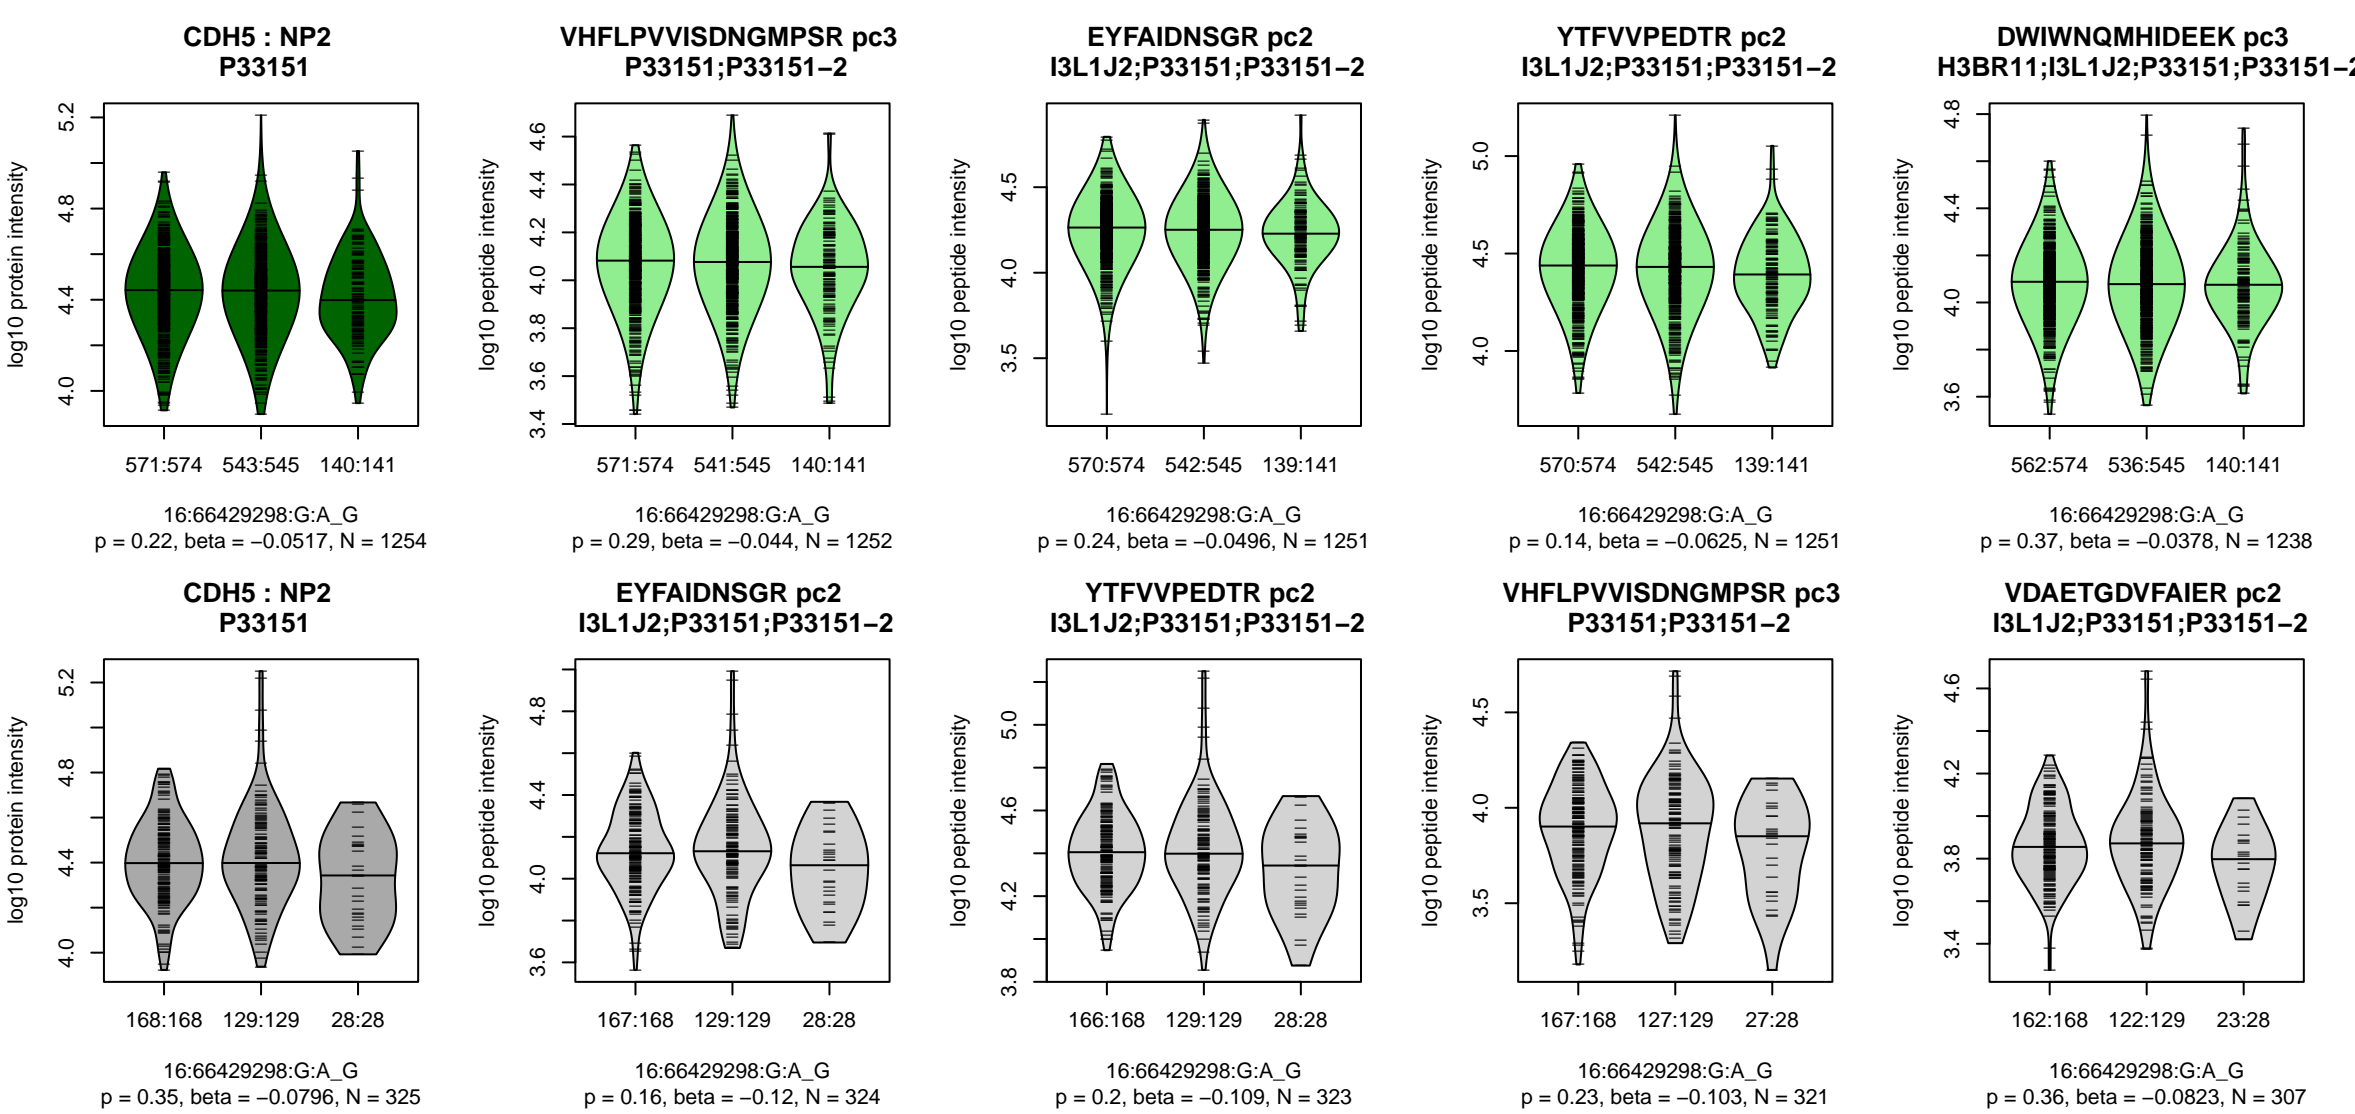

Assay Target: CDH5  
 Olink UniProt: P33151  
 deCODE rsID: rs11649312  
 Proxy rsID: rs11649312  
 deCODE: 16:66395395:G:A  
 Proxy SNP: 16:66429298:G:A  
 deCODE log<sub>10</sub>(p): 68.6  
 deCODE BETA: -0.15  
 -----  
 1252:1251:1251:1238:1238:122

**SERPINF2 : NP4**  
**P08697**

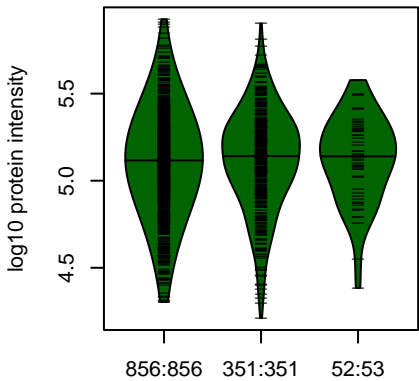

17:1618262:C:T\_T  
p = 0.79, beta = 0.0135, N = 1259

**LGNQEPGGQTALK pc2**  
**P08697**

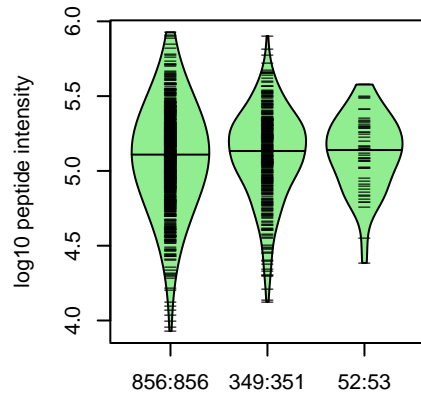

17:1618262:C:T\_T  
p = 0.72, beta = 0.018, N = 1257

**LCQDLGPGAFR pc2**  
**P08697;P08697-2**

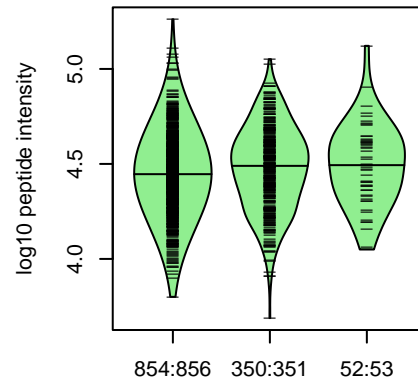

17:1618262:C:T\_T  
p = 0.022, beta = 0.114, N = 1256

**SPPGVCSR pc2**  
**P08697**

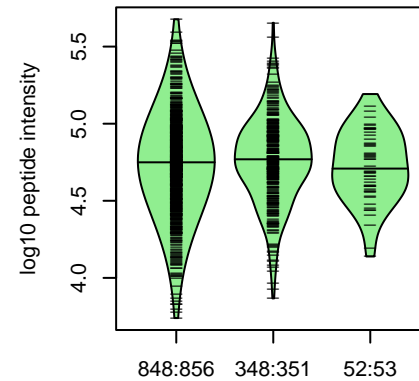

17:1618262:C:T\_T  
p = 0.96, beta = -0.00235, N = 1248

**DFLQSLK pc2**  
**P08697;P08697-2**

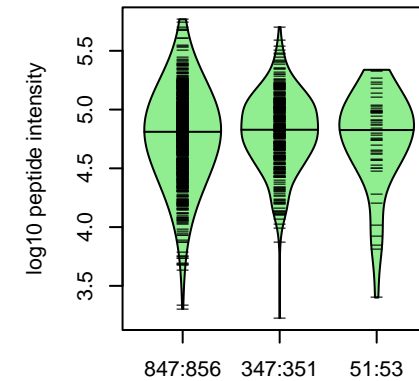

17:1618262:C:T\_T  
p = 0.78, beta = 0.0138, N = 1245

**SERPINF2 : NP4**  
**P08697**

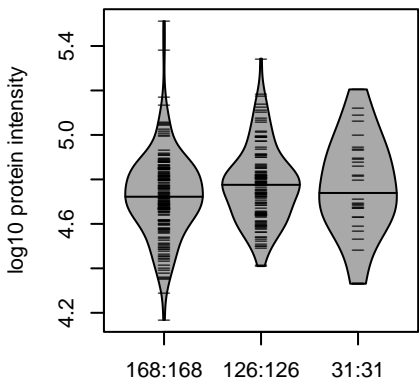

17:1618262:C:T\_T  
p = 0.033, beta = 0.177, N = 325

**EDFLEQSEQLFGAK pc2**  
**P08697;P08697-2**

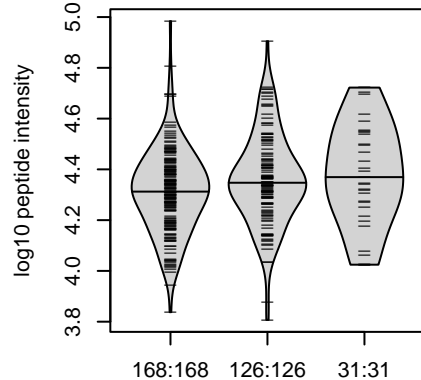

17:1618262:C:T\_T  
p = 0.0036, beta = 0.24, N = 325

**LCQDLGPGAFR pc2**  
**P08697;P08697-2**

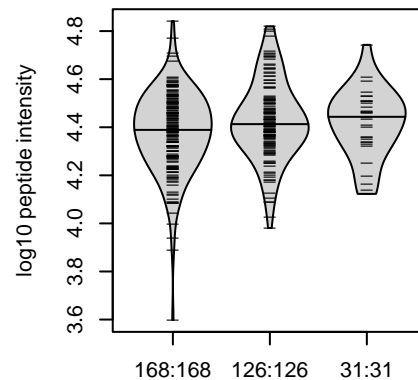

17:1618262:C:T\_T  
p = 0.076, beta = 0.147, N = 325

**LGNQEPGGQTALK pc2**  
**P08697**

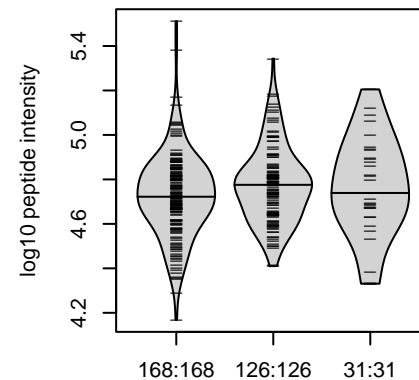

17:1618262:C:T\_T  
p = 0.04, beta = 0.171, N = 325

**QEDDLANINQWVK pc2**  
**P08697;P08697-2**

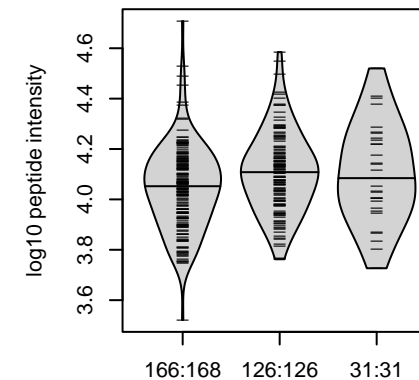

17:1618262:C:T\_T  
p = 0.0024, beta = 0.252, N = 323

**QLTSGPNQEQVSPLTLK pc2**  
**rs2070863 REF**

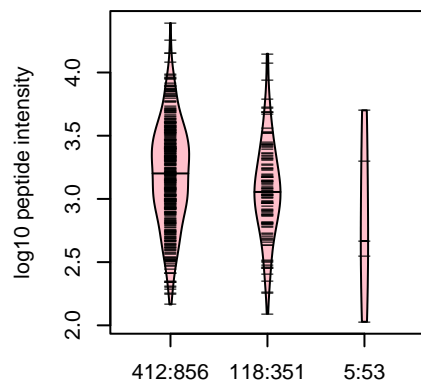

17:1618262:C:T\_T  
p = 2.8e-09, model = REC, N = 535

**QLTSGPNQEQVSPLTLK pc3**  
**rs2070863 REF**

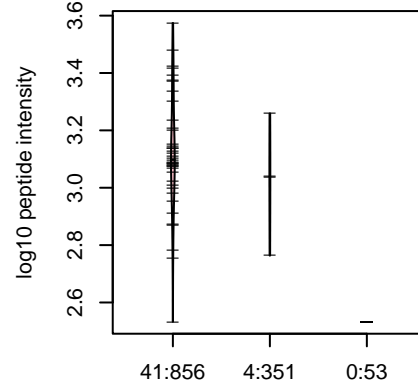

17:1618262:C:T\_T  
p = 0.00029, model = REC, N = 45

Assay Target: SERPINF2  
Olink UniProt: P08697  
deCODE rsID: rs11078596  
Proxy rsID: rs11078596  
deCODE: 17:1714968:T:C  
Proxy SNP: 17:1618262:C:T  
deCODE log10(p): 67.8  
deCODE BETA: -0.17  
-----\*-----  
1257:1256:1248:1245:1241:124

**AKR7A2 : NP5**  
**O43488**

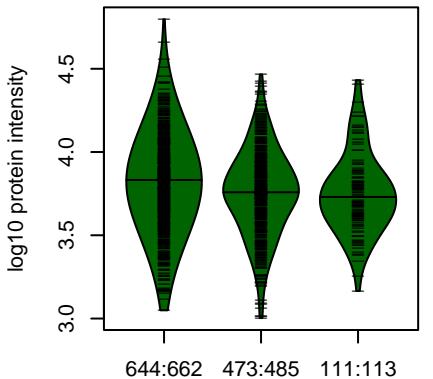

1:19657013:T:C\_C  
p = 3e-05, beta = -0.181, N = 1228

**FYAYNPLAGLLTGK pc2**  
**O43488**

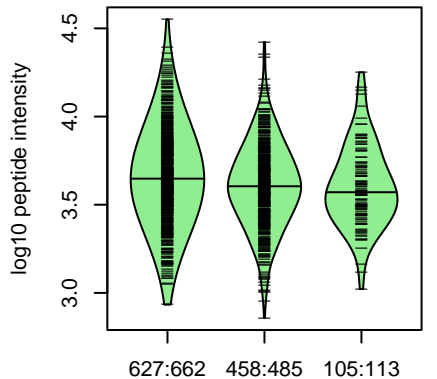

1:19657013:T:C\_C  
p = 0.00025, beta = -0.162, N = 1190

**QVETELFPCLR pc2**  
**O43488;O95154**

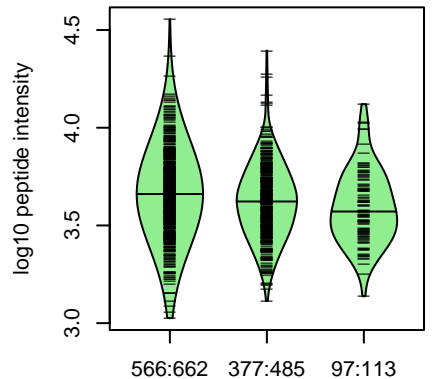

1:19657013:T:C\_C  
p = 3.3e-05, beta = -0.194, N = 1040

**VASVLGTMEMGR pc2**  
**O43488**

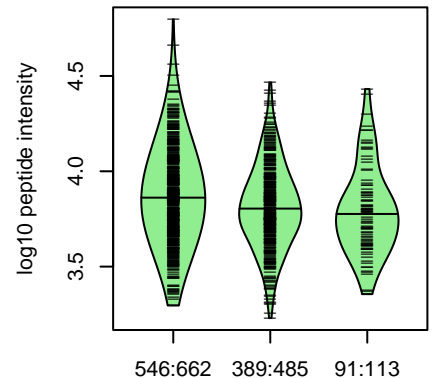

1:19657013:T:C\_C  
p = 9.5e-06, beta = -0.21, N = 1026

**MDAPASAAAVR pc2**  
**O43488**

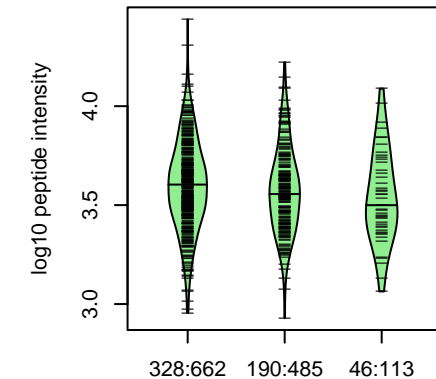

1:19657013:T:C\_C  
p = 0.034, beta = -0.138, N = 564

**AKR7A2 : NP5**  
**O43488**

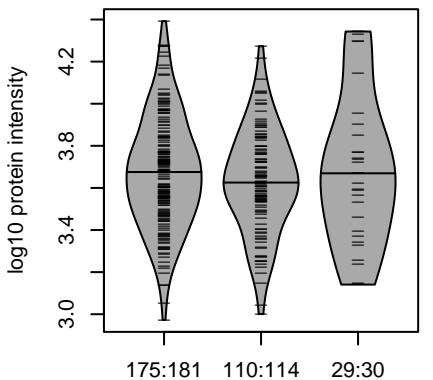

1:19657013:T:C\_C  
p = 0.27, beta = -0.0936, N = 314

**FYAYNPLAGLLTGK pc2**  
**O43488**

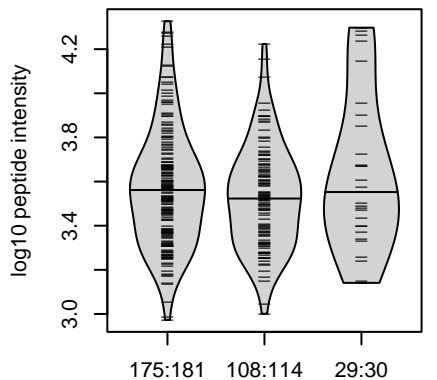

1:19657013:T:C\_C  
p = 0.72, beta = -0.0309, N = 312

**VASVLGTMEMGR pc2**  
**O43488**

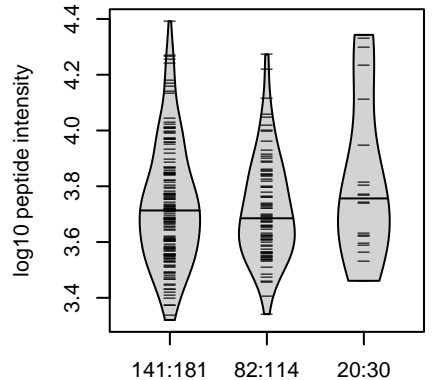

1:19657013:T:C\_C  
p = 0.58, beta = 0.0547, N = 243

**ALQAAYGASAPSVTSAALR pc2**  
**O43488**

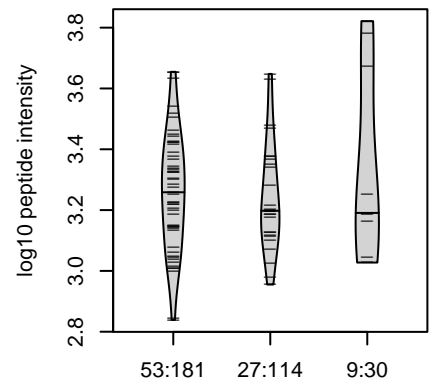

1:19657013:T:C\_C  
p = 0.57, beta = 0.0871, N = 89

**MDAPASAAAVR pc2**  
**O43488**

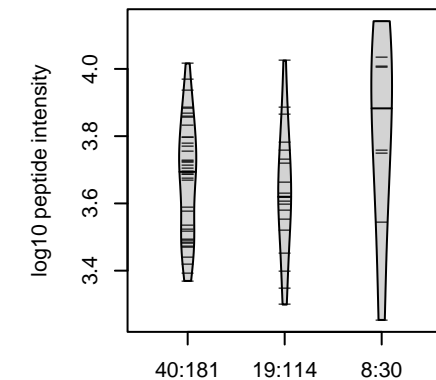

1:19657013:T:C\_C  
p = 0.37, beta = 0.152, N = 67

Assay Target: AKR7A2  
Olink UniProt: O43488  
deCODE rsID: rs61766662  
Proxy rsID: rs61766662  
deCODE: 1:19330519:C:T  
Proxy SNP: 1:19657013:T:C  
deCODE log10(p): 67.7  
deCODE BETA: -0.15  
\*.\*.\*-.-.-.-.-  
1190:1040:1026:564:537:263:78

**TPST2 : NP4  
O60704**

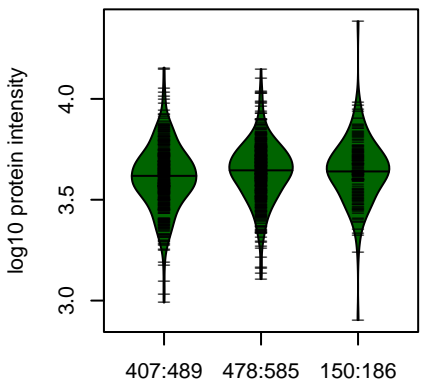

22:26924456:G:A\_A  
p = 0.0045, beta = 0.127, N = 1035

**AMPLIFVGGVPR pc2  
O60704**

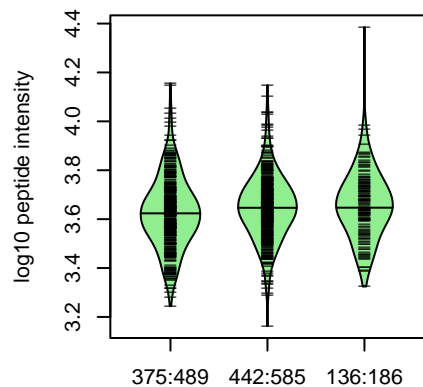

22:26924456:G:A\_A  
p = 0.0043, beta = 0.133, N = 953

**PVNLEALSK pc2  
O60704**

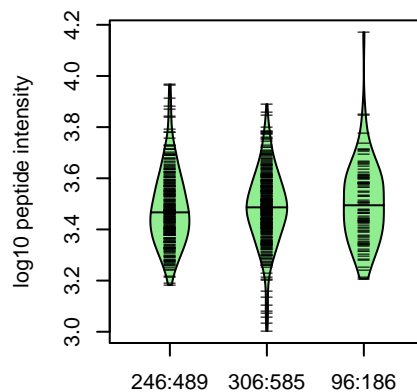

22:26924456:G:A\_A  
p = 0.22, beta = 0.0697, N = 648

**WTGHIPGDVVR pc3  
O60704**

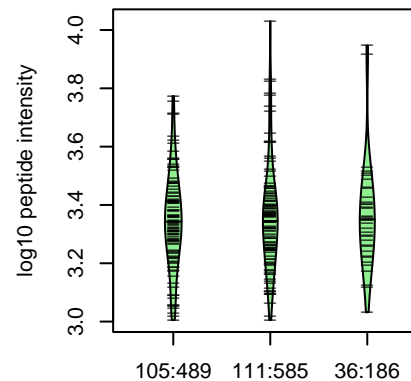

22:26924456:G:A\_A  
p = 0.35, beta = 0.0825, N = 252

**AMLDAHPEVR pc2  
O60704**

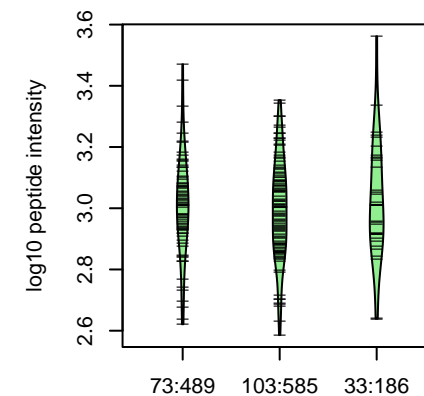

22:26924456:G:A\_A  
p = 0.65, beta = 0.0455, N = 209

**TPST2 : NP4  
O60704**

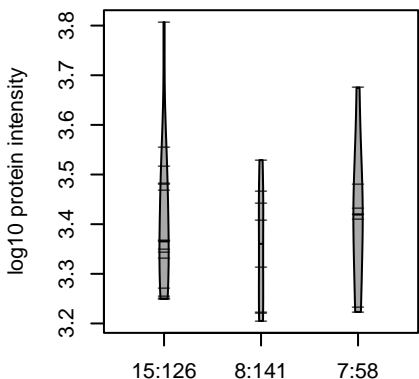

22:26924456:G:A\_A  
p = 0.64, beta = -0.0997, N = 30

**AMPLIFVGGVPR pc2  
O60704**

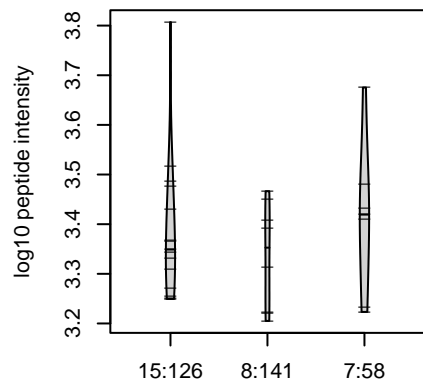

22:26924456:G:A\_A  
p = 0.95, beta = 0.0135, N = 30

Assay Target: TPST2  
Olink UniProt: O60704  
deCODE rsID: rs2283824  
Proxy rsID: rs2283824  
deCODE: 22:26528490:A:G  
Proxy SNP: 22:26924456:G:A  
deCODE log10(p): 67  
deCODE BETA: 0.15  
\*:---:---:---:---:---:---  
953:648:252:209:129:118:116:5

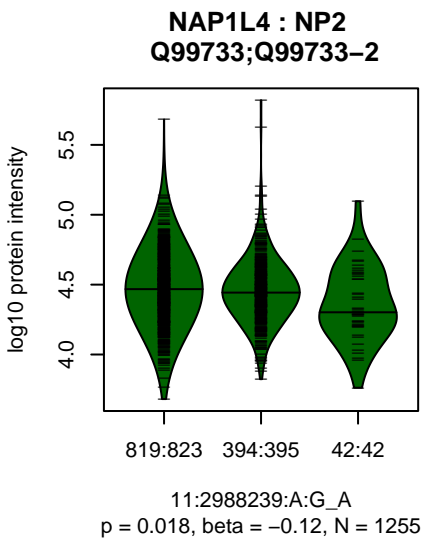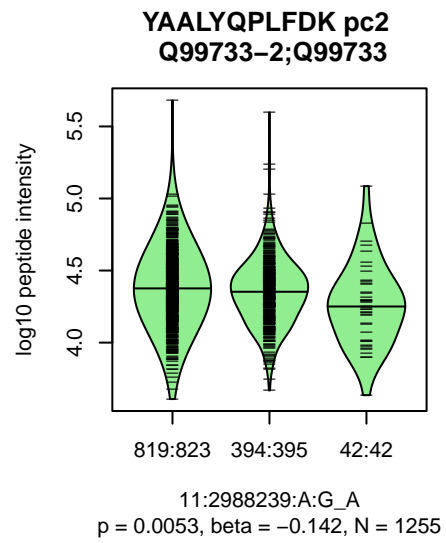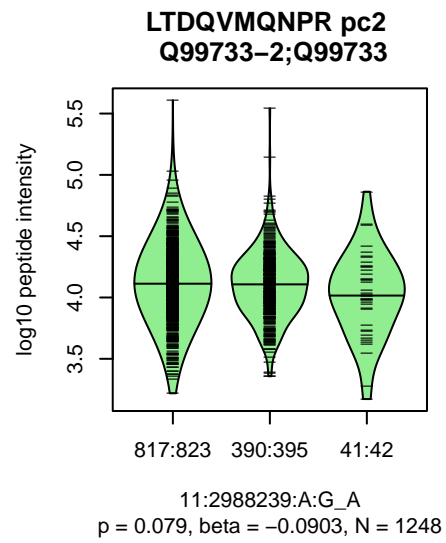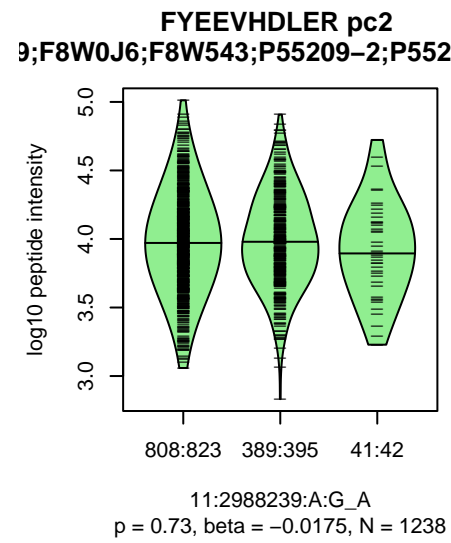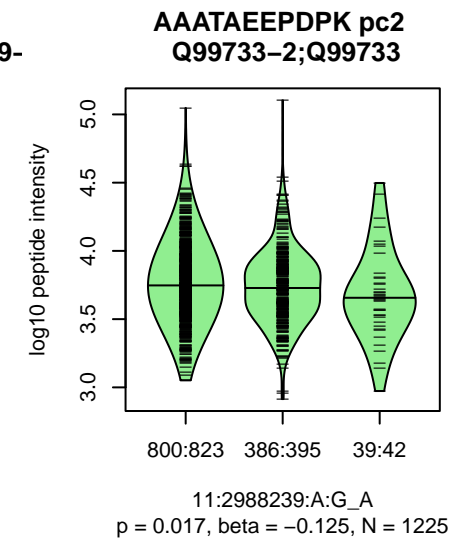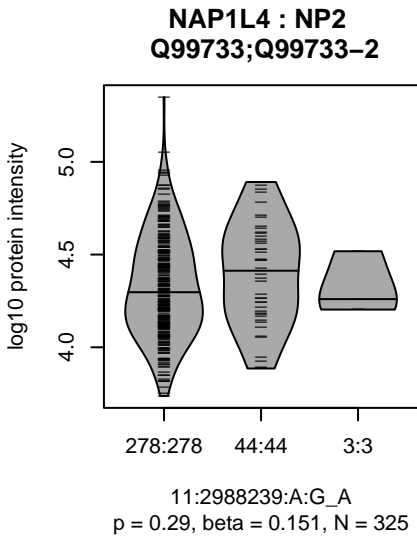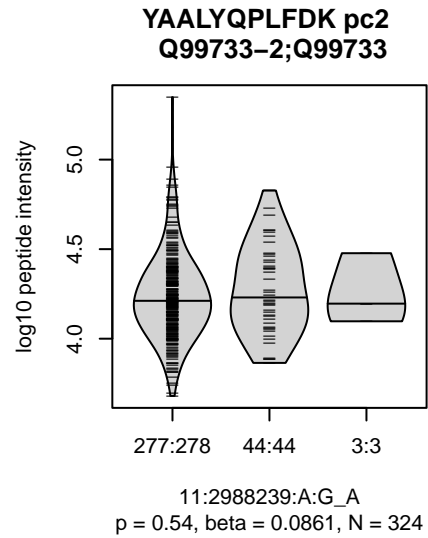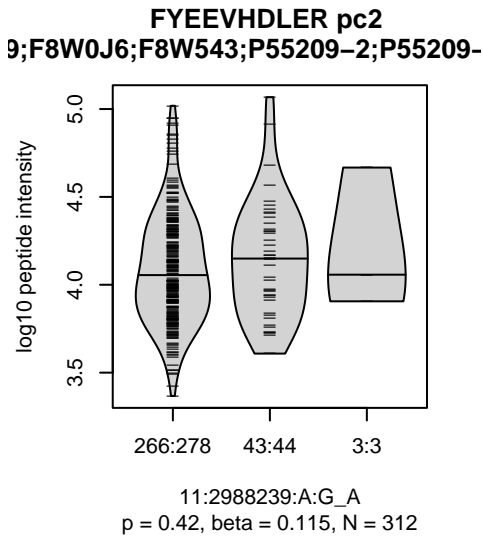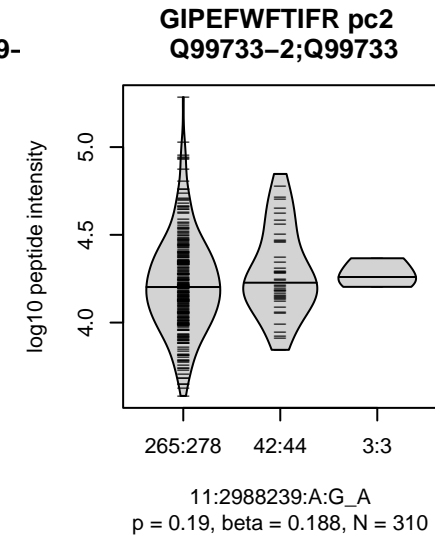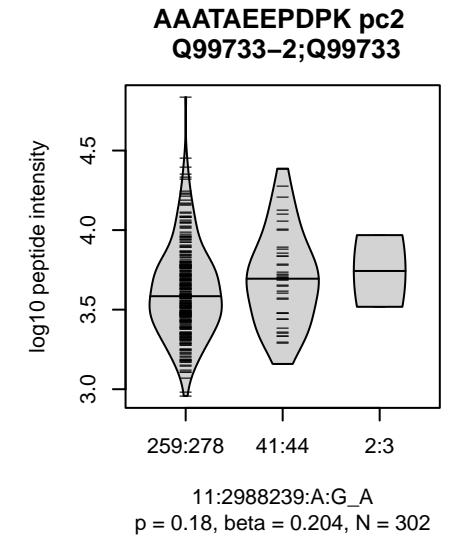

Assay Target: NAP1L4  
 Olink UniProt: Q99733  
 deCODE rsID: rs57928937  
 Proxy rsID: rs7109587  
 deCODE: 11:2969023:C:CT  
 Proxy SNP: 11:2988239:A:G  
 deCODE log10(p): 66.1  
 deCODE BETA: -0.18  
 \*:-:--:--:--:--:--:--:NA  
 1255:1248:1238:1225:1225:118

**PIGR : NP4  
P01833**

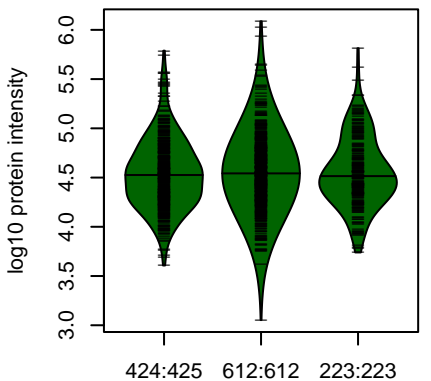

1:207109846:G:A\_A  
p = 0.81, beta = 0.00989, N = 1259

**LVSLTLNLVTR pc2  
P01833**

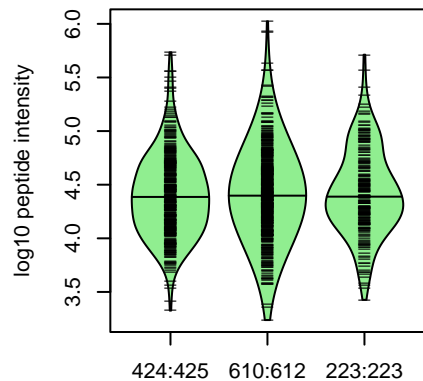

1:207109846:G:A\_A  
p = 0.67, beta = 0.0171, N = 1257

**ADEGWYWCGVK pc2  
P01833**

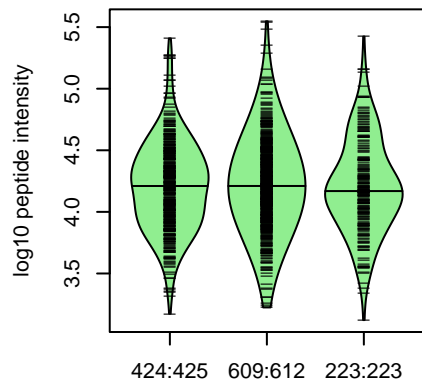

1:207109846:G:A\_A  
p = 0.83, beta = -0.00886, N = 1256

**CPLLVDSEGWVK pc2  
P01833**

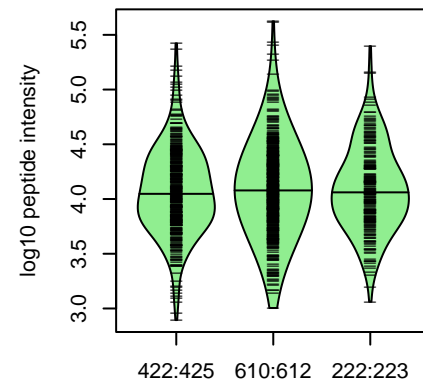

1:207109846:G:A\_A  
p = 0.67, beta = 0.0172, N = 1254

**DGSFSVVITGLR pc2  
P01833**

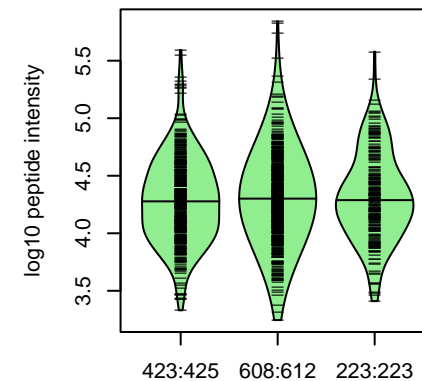

1:207109846:G:A\_A  
p = 0.36, beta = 0.0369, N = 1254

**PIGR : NP4  
P01833**

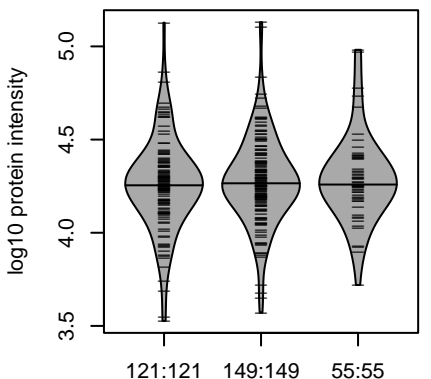

1:207109846:G:A\_A  
p = 0.85, beta = 0.0148, N = 325

**GGCITLISSEGYVSSK pc2  
P01833**

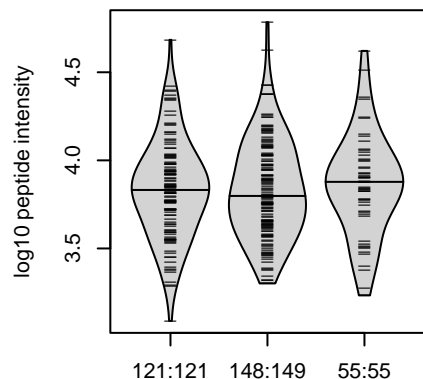

1:207109846:G:A\_A  
p = 0.82, beta = -0.0172, N = 324

**LVSLTLNLVTR pc2  
P01833**

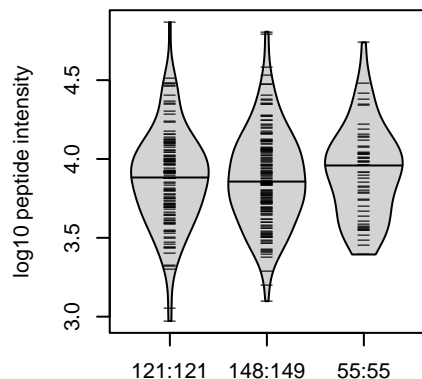

1:207109846:G:A\_A  
p = 0.94, beta = -0.00541, N = 324

**ADEGWYWCGVK pc2  
P01833**

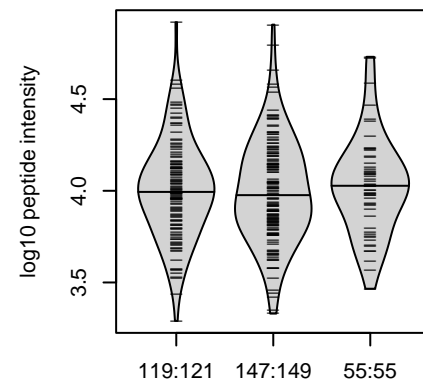

1:207109846:G:A\_A  
p = 0.82, beta = -0.0182, N = 321

**YWCLWEGAQNGR pc2  
P01833**

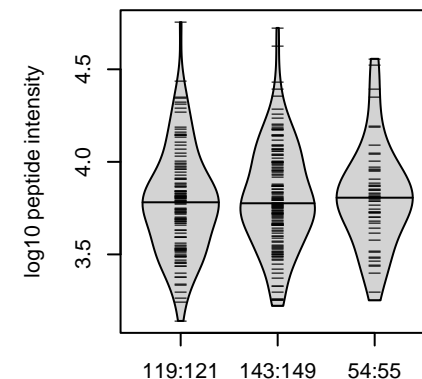

1:207109846:G:A\_A  
p = 0.87, beta = 0.0124, N = 316

**GVAGSSVAVLCPYNR pc2  
rs2275531 ALT**

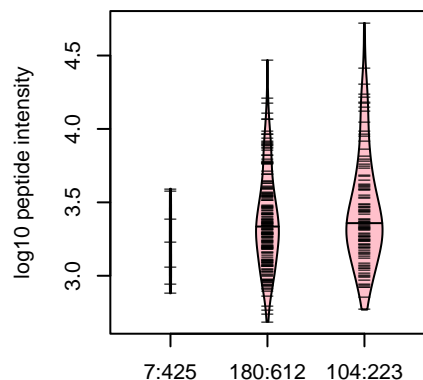

1:207109846:G:A\_A  
p = 4.8e-49, model = REC, N = 291

**GVAGSSVAVLCPYNR pc2  
rs2275531 REF**

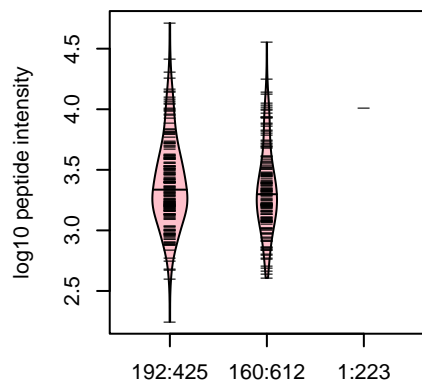

1:207109846:G:A\_A  
p = 3.7e-34, model = DOM, N = 353

**ADAAPDEK pc2  
rs291102 REF**

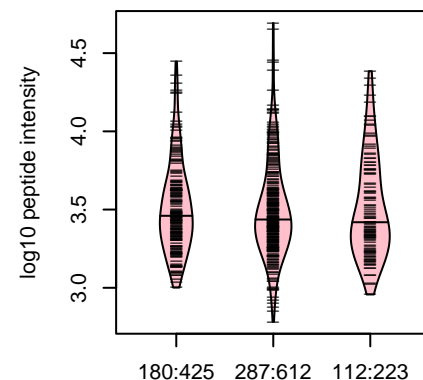

1:207109846:G:A\_A  
p = 0.073, model = REC, N = 579

Assay Target: PIGR  
Olink UniProt: P01833  
deCODE rsID: rs748844  
Proxy rsID: rs748844  
deCODE: 1:206936501:A:G  
Proxy SNP: 1:207109846:G:A  
deCODE log10(p): 63.7  
deCODE BETA: -0.14  
-----  
1257:1256:1254:1254:1254:123



**ANXA5 : NP1  
P08758**

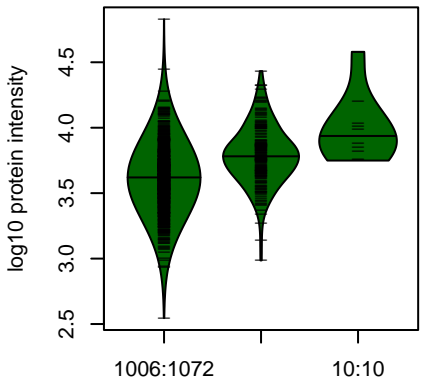

4:122615760:G:A\_A  
p = 2.6e-23, beta = 0.718, N = 1190

**FITIFGTR pc2  
D6RBE9;D6RBL5;P08758**

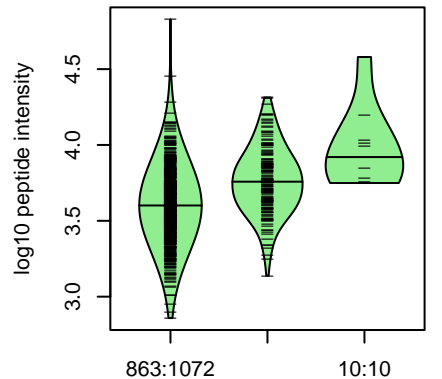

4:122615760:G:A\_A  
p = 3.3e-19, beta = 0.672, N = 1034

**GTVTDFPGFDER pc2  
D6RBE9;D6RCN3;E9PHT9;P08758**

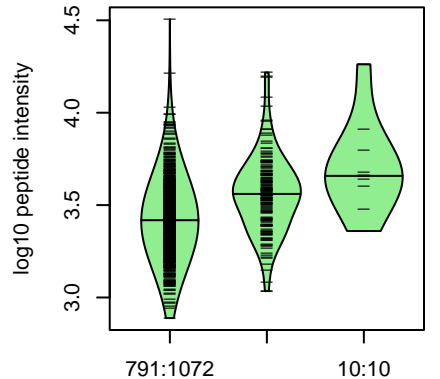

4:122615760:G:A\_A  
p = 3.1e-15, beta = 0.604, N = 957

**SEIDLFNIR pc2  
D6RBE9;D6RBL5;P08758**

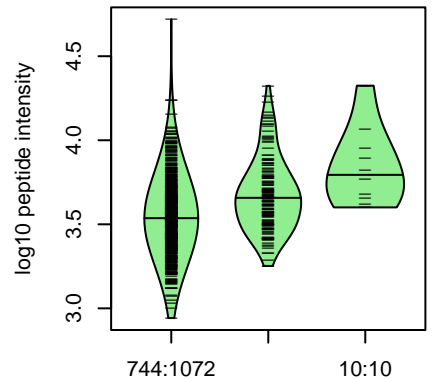

4:122615760:G:A\_A  
p = 1.6e-12, beta = 0.55, N = 905

**NFATSLYSMIK pc2  
D6RBE9;D6RBL5;P08758**

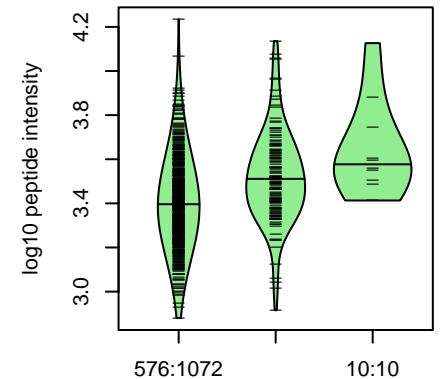

4:122615760:G:A\_A  
p = 1e-10, beta = 0.532, N = 721

**ANXA5 : NP1  
P08758**

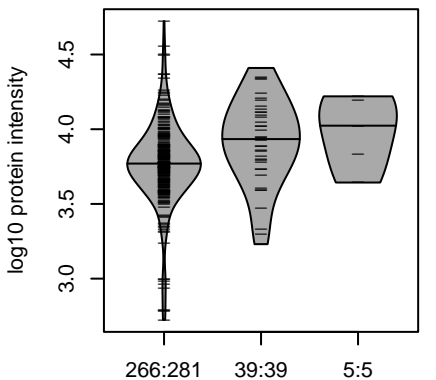

4:122615760:G:A\_A  
p = 0.00042, beta = 0.482, N = 310

**FITIFGTR pc2  
D6RBE9;D6RBL5;P08758**

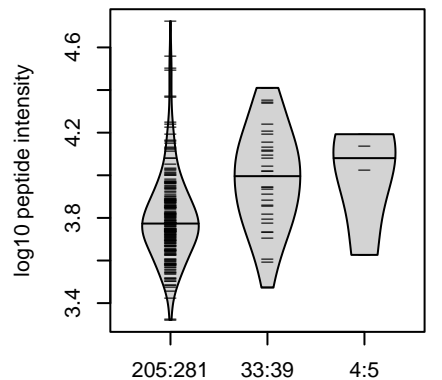

4:122615760:G:A\_A  
p = 0.00012, beta = 0.575, N = 242

**GTVTDFPGFDER pc2  
D6RBE9;D6RCN3;E9PHT9;P08758**

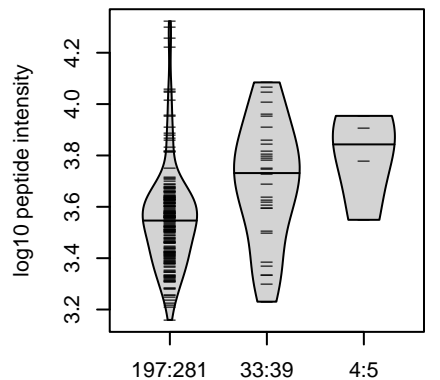

4:122615760:G:A\_A  
p = 0.00014, beta = 0.57, N = 234

**GLGTDEESILLLTSR pc2  
E9PHT9;P08758**

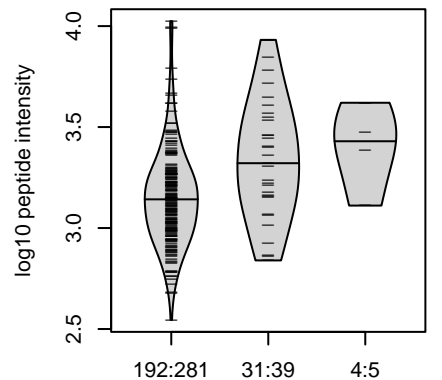

4:122615760:G:A\_A  
p = 0.00055, beta = 0.529, N = 227

**SEIDLFNIR pc2  
D6RBE9;D6RBL5;P08758**

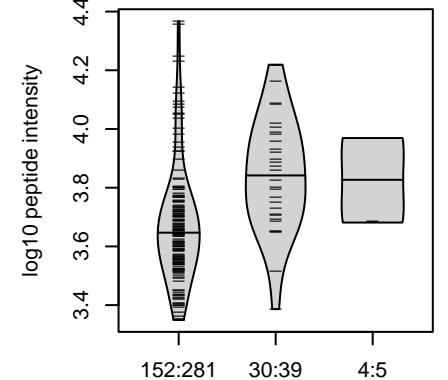

4:122615760:G:A\_A  
p = 0.00017, beta = 0.586, N = 186

Assay Target: ANXA5  
Olink UniProt: P08758  
deCODE rsID: rs9995591  
Proxy rsID: rs9995591  
deCODE: 4:121694605:A:G  
Proxy SNP: 4:122615760:G:A  
deCODE log10(p): 63.4  
deCODE BETA: 0.26  
\*:\*:\*:\*:\*:\*:\*:-:-:-:-:NA  
1034:957:905:721:641:579:208:

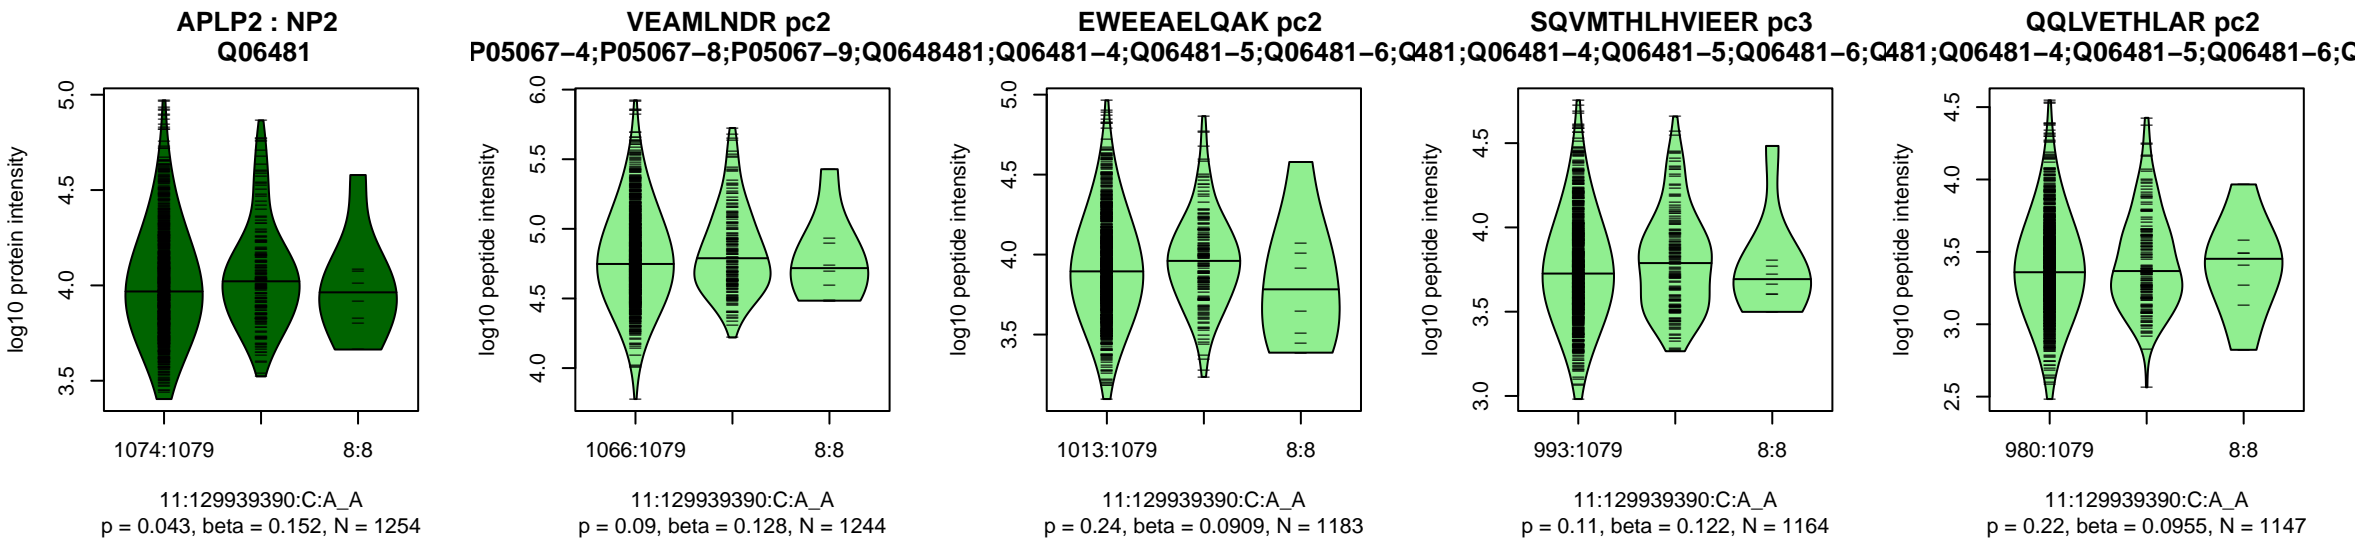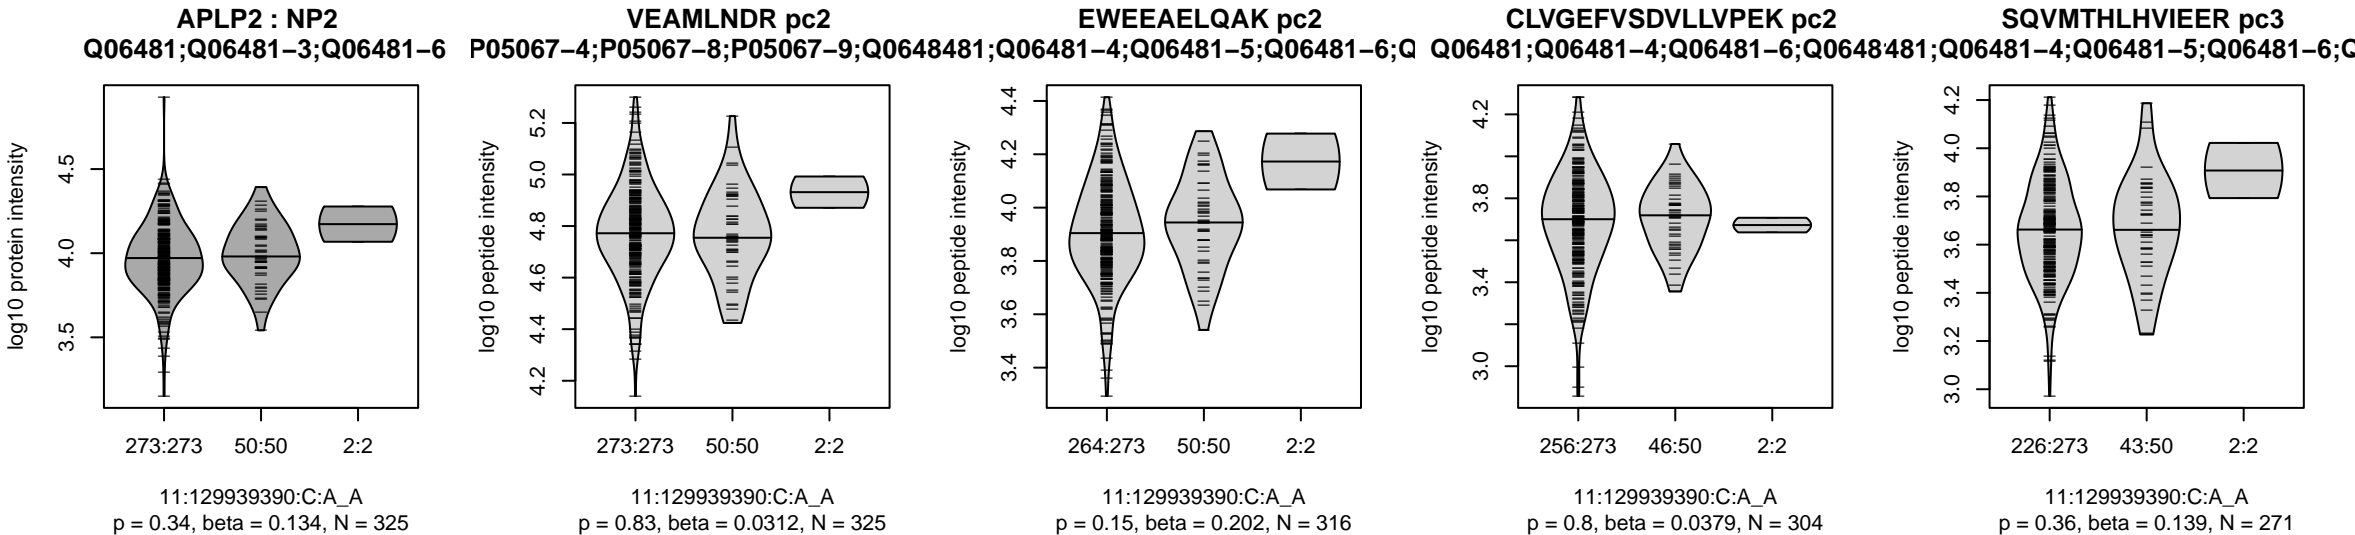

Assay Target: APLP2  
 Olink UniProt: Q06481  
 deCODE rsID: rs73583419  
 Proxy rsID: rs73583419  
 deCODE: 11:130069495:A:C  
 Proxy SNP: 11:129939390:C:A  
 deCODE log10(p): 62.6  
 deCODE BETA: 0.28  
 -----  
 1244:1183:1164:1147:1121:110

**TF : NP4  
P02787**

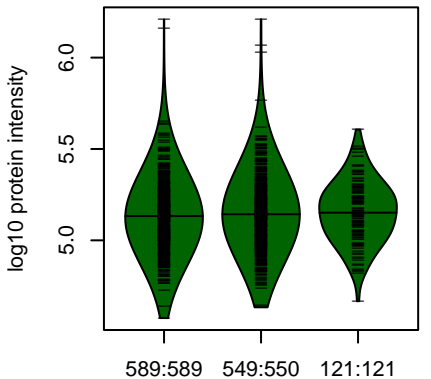

3:133479230:A:G\_G  
p = 0.078, beta = 0.0759, N = 1259

**CSTSSLLEACTFR pc2  
P02787**

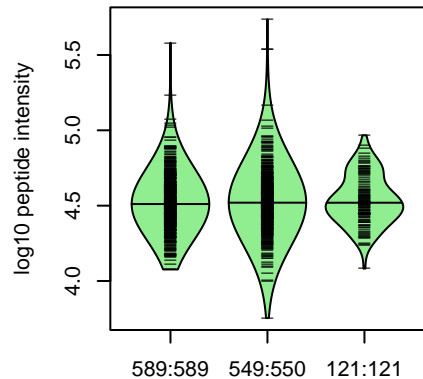

3:133479230:A:G\_G  
p = 0.28, beta = 0.0465, N = 1259

**DCHLAQVPSHTVVAR pc3  
P02787**

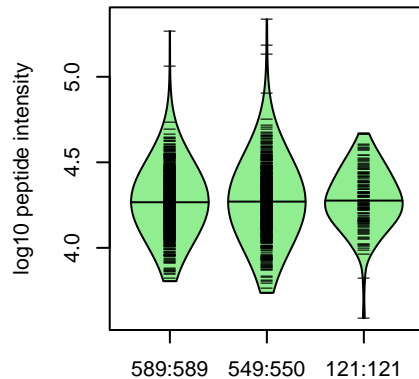

3:133479230:A:G\_G  
p = 0.48, beta = 0.0302, N = 1259

**DLLFRDDTVCLAK pc3  
P02787**

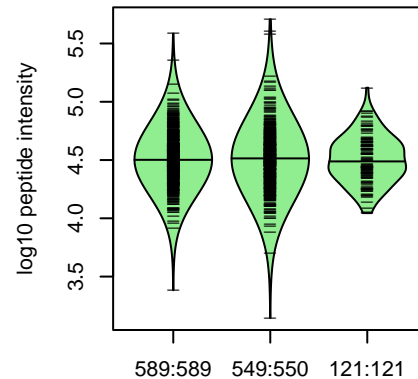

3:133479230:A:G\_G  
p = 1, beta = 4.76e-05, N = 1259

**DSGFQMNQLR pc2  
P02787**

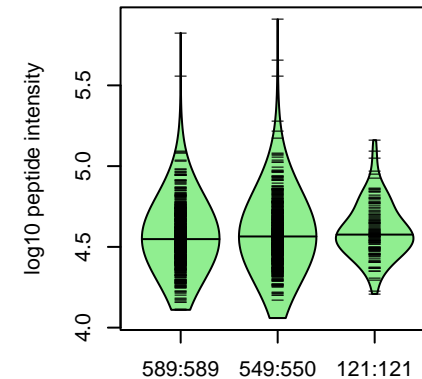

3:133479230:A:G\_G  
p = 0.022, beta = 0.0987, N = 1259

**TF : NP4  
P02787**

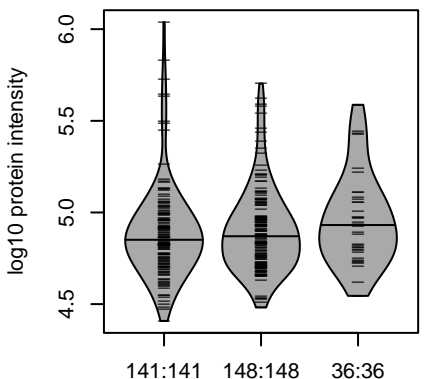

3:133479230:A:G\_G  
p = 0.58, beta = 0.0453, N = 325

**CSTSSLLEACTFR pc2  
P02787**

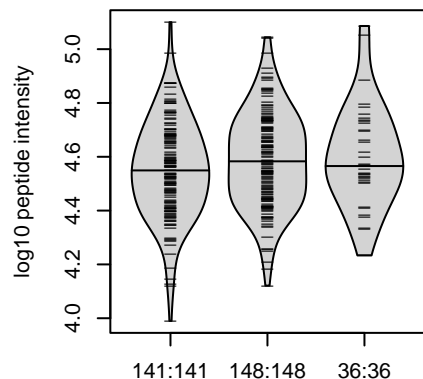

3:133479230:A:G\_G  
p = 0.25, beta = 0.0956, N = 325

**DCHLAQVPSHTVVAR pc3  
P02787**

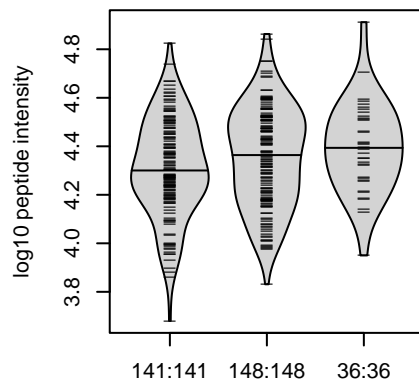

3:133479230:A:G\_G  
p = 0.046, beta = 0.164, N = 325

**EFQLFSSPHGK pc2  
P02787**

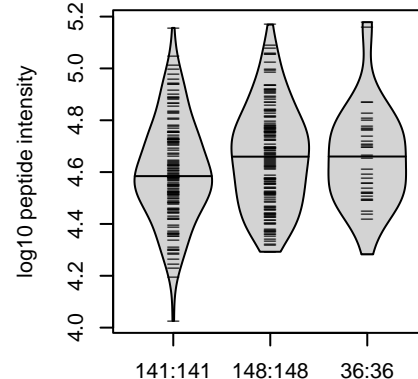

3:133479230:A:G\_G  
p = 0.1, beta = 0.135, N = 325

**FDEFFSEGCAPGSK pc2  
P02787**

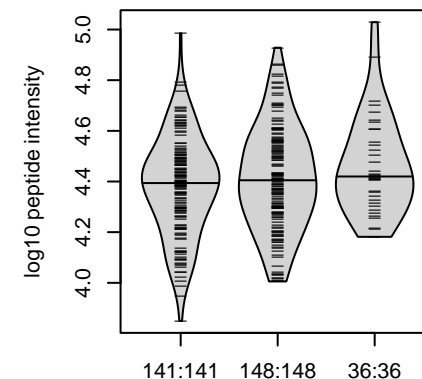

3:133479230:A:G\_G  
p = 0.066, beta = 0.151, N = 325

Assay Target: TF  
Olink UniProt: P02787  
deCODE rsID: rs8177245  
Proxy rsID: rs8177245  
deCODE: 3:133760386:G:A  
Proxy SNP: 3:133479230:A:G  
deCODE log10(p): 62.3  
deCODE BETA: 0.14  
-----\*-----  
1259:1259:1259:1259:1259:125

**SVEEYANCHLAR pc2  
rs1049296 ALT**

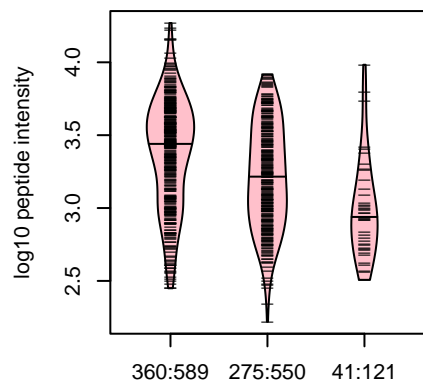

3:133479230:A:G\_G  
p = 6.3e-07, model = REC, N = 676

**SVEEYANCHLAR pc3  
rs1049296 ALT**

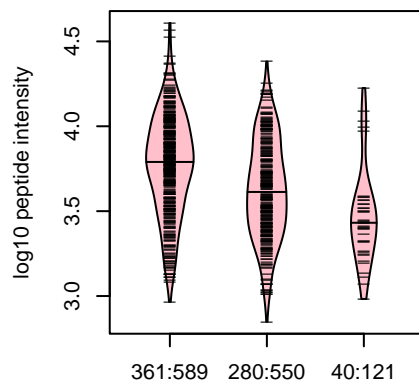

3:133479230:A:G\_G  
p = 1.2e-06, model = DOM, N = 681

**PVEEYANCHLAR pc3  
rs1049296 REF**

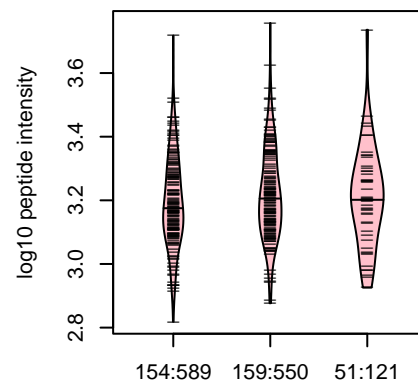

3:133479230:A:G\_G  
p = 0.001, model = DOM, N = 364

**PVEEYANCHLAR pc2  
rs1049296 REF**

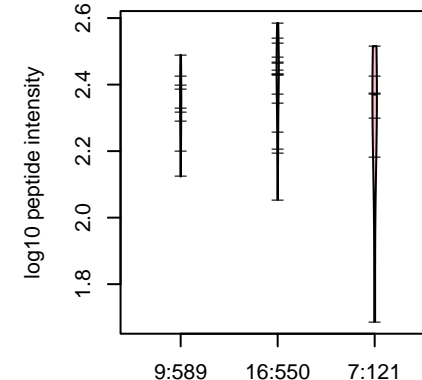

3:133479230:A:G\_G  
p = 0.028, model = DOM, N = 32

**PXDN : NP4  
Q92626**

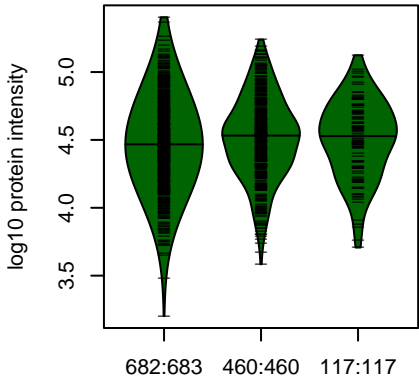

2:1747993:G:A\_A  
p = 0.18, beta = 0.0578, N = 1259

**NLNTLLLNNNQIK pc2  
Q92626**

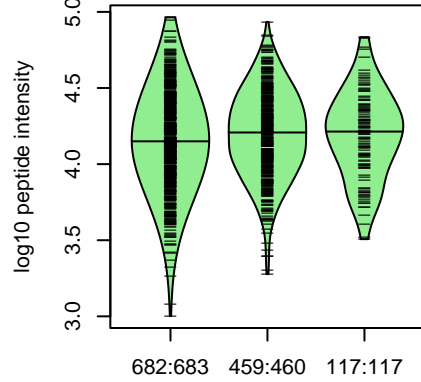

2:1747993:G:A\_A  
p = 0.19, beta = 0.0555, N = 1258

**RIPSGAFEDLENLK pc3  
Q92626**

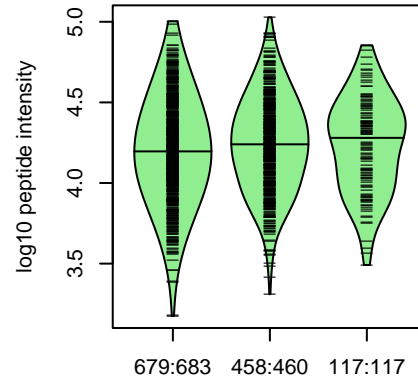

2:1747993:G:A\_A  
p = 0.23, beta = 0.0511, N = 1254

**SPNDLLALFR pc2  
Q92626**

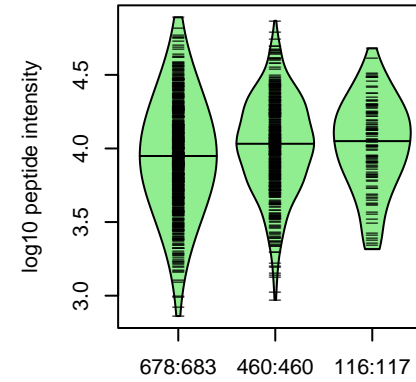

2:1747993:G:A\_A  
p = 0.012, beta = 0.107, N = 1254

**IVNEGGIDPLLRL pc2  
Q92626**

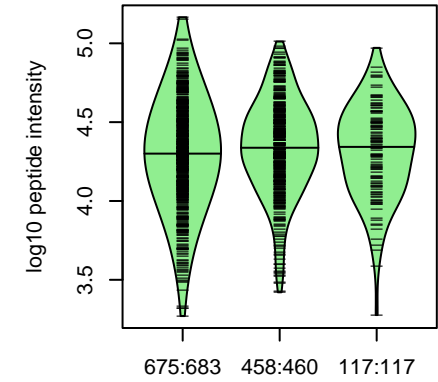

2:1747993:G:A\_A  
p = 0.49, beta = 0.0296, N = 1250

**PXDN : NP4  
Q92626**

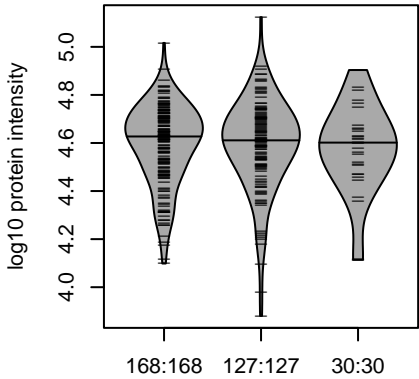

2:1747993:G:A\_A  
p = 0.4, beta = 0.0702, N = 325

**AEGNPKPEIIWLR pc3  
Q92626**

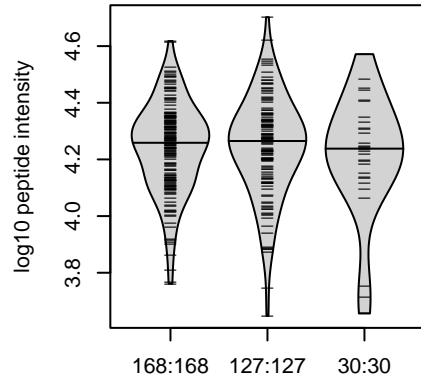

2:1747993:G:A\_A  
p = 0.37, beta = 0.0757, N = 325

**GNPPVIAWTK pc2  
Q92626**

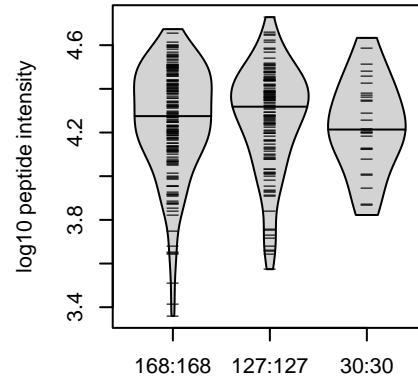

2:1747993:G:A\_A  
p = 0.77, beta = 0.0247, N = 325

**IVGAEIQHITYQHWLPK pc3  
Q92626**

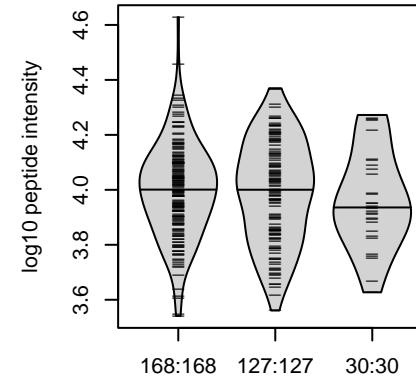

2:1747993:G:A\_A  
p = 0.61, beta = 0.0431, N = 325

**LGPTLMCLLSTQFK pc2  
Q92626**

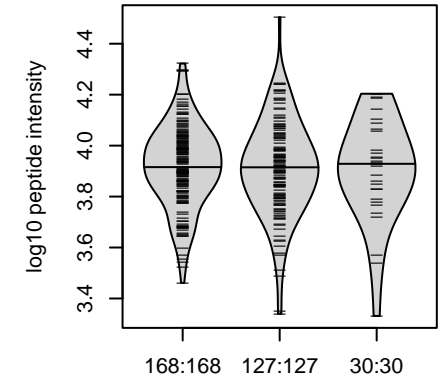

2:1747993:G:A\_A  
p = 0.73, beta = 0.0292, N = 325

Assay Target: PXDN  
Olink UniProt: Q92626  
deCODE rsID: rs73182757  
Proxy rsID: rs62116430  
deCODE: 2:1744125:G:A  
Proxy SNP: 2:1747993:G:A  
deCODE log10(p): 57.8  
deCODE BETA: 0.15  
-----  
1258:1254:1254:1250:1243:124

**NDST1 : NP5  
P52848**

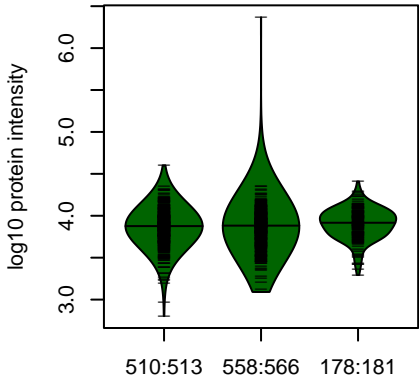

5:149909931:C:T\_T  
 $p = 0.09$ ,  $\beta = 0.069$ ,  $N = 1246$

**LLIIGPQK pc2  
P52848;P52848-3**

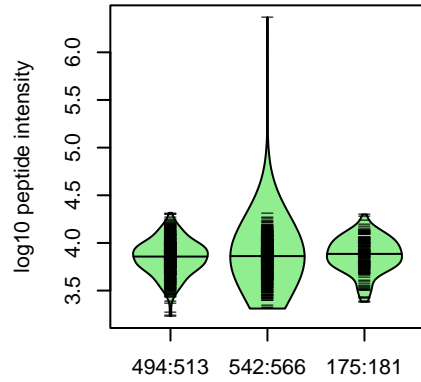

5:149909931:C:T\_T  
 $p = 0.38$ ,  $\beta = 0.0364$ ,  $N = 1211$

**VTILINPADR pc2  
P52848;P52848-3**

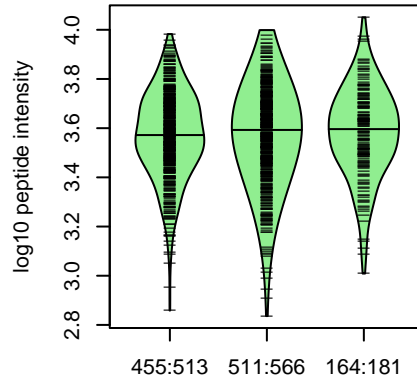

5:149909931:C:T\_T  
 $p = 0.57$ ,  $\beta = 0.0243$ ,  $N = 1130$

**ANENLLSAQLK pc2  
P52848;P52848-3**

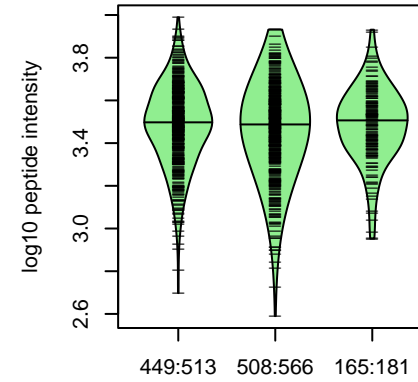

5:149909931:C:T\_T  
 $p = 0.54$ ,  $\beta = -0.0264$ ,  $N = 1122$

**VLFGNNLFWLHK pc3  
O95803;P52848;P52848-3;Q9H3R**

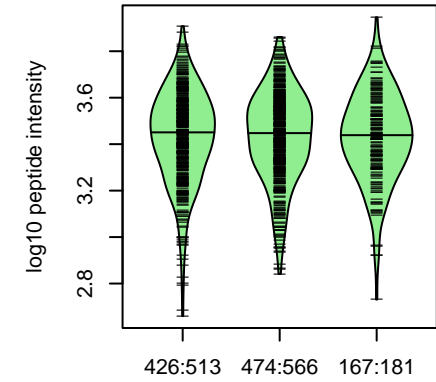

5:149909931:C:T\_T  
 $p = 0.75$ ,  $\beta = -0.0137$ ,  $N = 1067$

**NDST1 : NP5  
P52848**

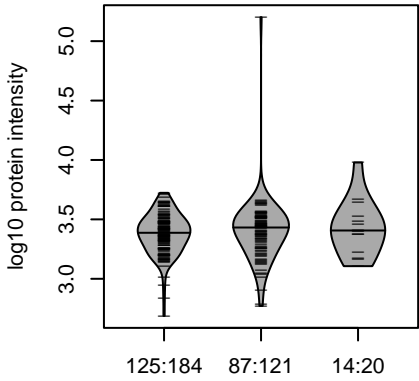

5:149909931:C:T\_T  
 $p = 0.45$ ,  $\beta = 0.0805$ ,  $N = 226$

**ANENLLSAQLK pc2  
P52848;P52848-3**

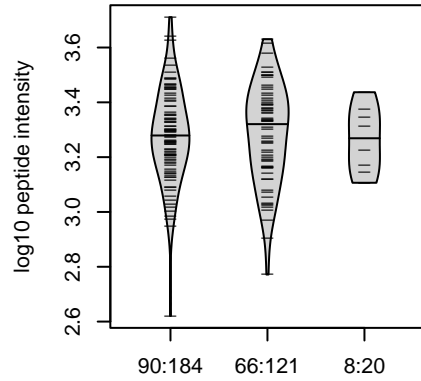

5:149909931:C:T\_T  
 $p = 0.81$ ,  $\beta = 0.0313$ ,  $N = 164$

**GFWCQLLEGGK pc2  
P52848;P52848-3;Q9H3R1**

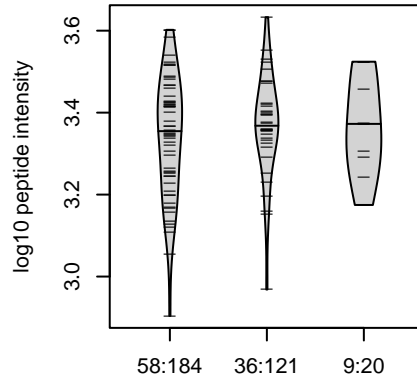

5:149909931:C:T\_T  
 $p = 0.69$ ,  $\beta = 0.0581$ ,  $N = 103$

**FLGVTNTIDYHK pc3  
P52848;P52848-3**

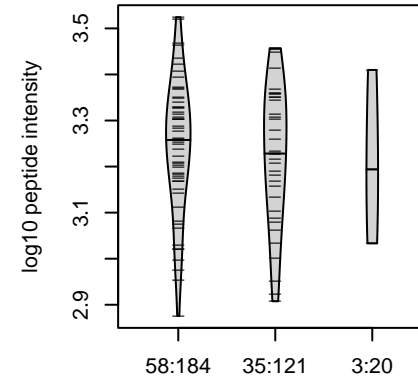

5:149909931:C:T\_T  
 $p = 0.51$ ,  $\beta = -0.119$ ,  $N = 96$

**LVFVDAVAFLTGK pc2  
P52848;P52848-3**

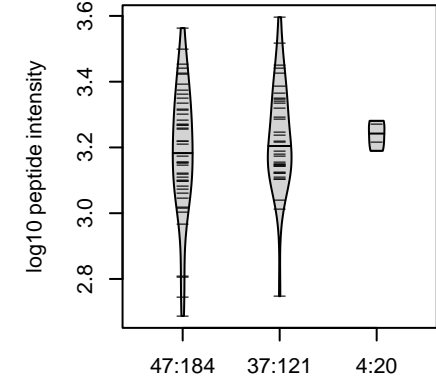

5:149909931:C:T\_T  
 $p = 0.24$ ,  $\beta = 0.206$ ,  $N = 88$

Assay Target: NDST1  
Olink UniProt: P52848  
deCODE rsID: rs6863373  
Proxy rsID: rs6863373  
deCODE: 5:150530369:T:C  
Proxy SNP: 5:149909931:C:T  
deCODE log10(p): 57.4  
deCODE BETA: 0.13  
-----  
1211:1130:1122:1067:1020:954



**GSTP1 : NP1  
P09211**

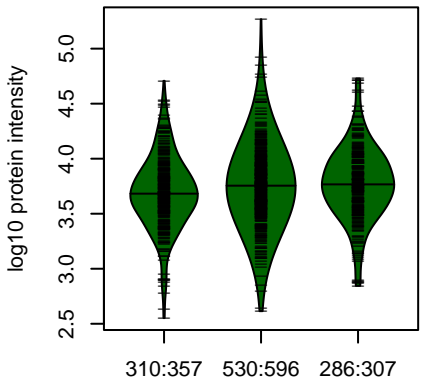

11:67334812:T:C\_T  
p = 0.0022, beta = 0.125, N = 1126

**MLLADQGQSWK pc2  
A8MX94;P09211**

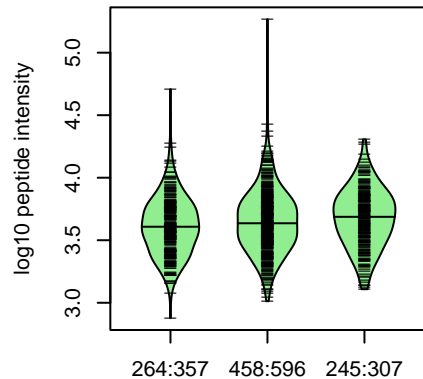

11:67334812:T:C\_T  
p = 0.00066, beta = 0.15, N = 967

**PFETLLSQNQGGK pc2  
P09211**

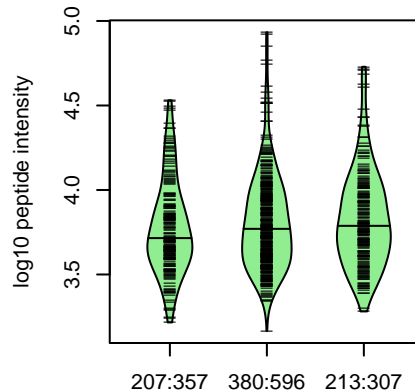

11:67334812:T:C\_T  
p = 0.13, beta = 0.0737, N = 800

**EEVVTVETWQEGSLK pc2  
A8MX94;P09211**

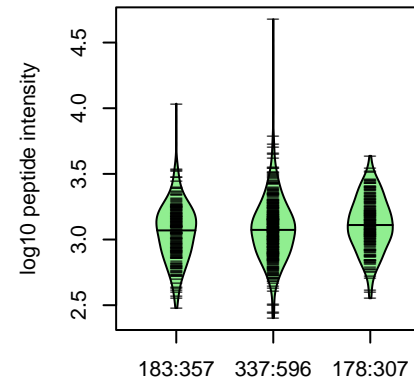

11:67334812:T:C\_T  
p = 0.0096, beta = 0.135, N = 698

**ASCLYGQLPK pc2  
A8MX94;P09211**

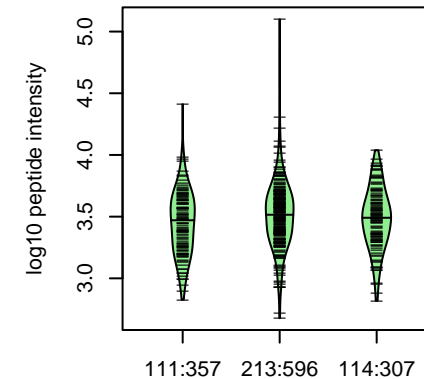

11:67334812:T:C\_T  
p = 0.48, beta = 0.0462, N = 438

**GSTP1 : NP1  
P09211**

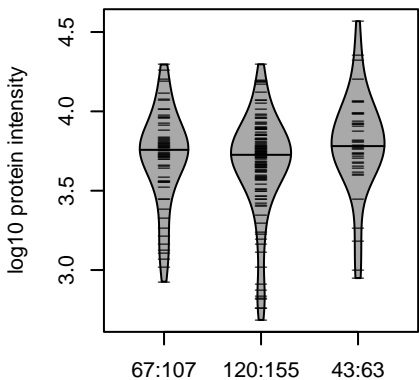

11:67334812:T:C\_T  
p = 0.23, beta = 0.114, N = 230

**PFETLLSQNQGGK pc2  
P09211**

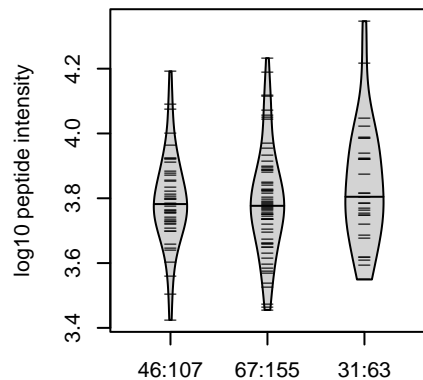

11:67334812:T:C\_T  
p = 0.55, beta = 0.0677, N = 144

**EEVVTVETWQEGSLK pc2  
A8MX94;P09211**

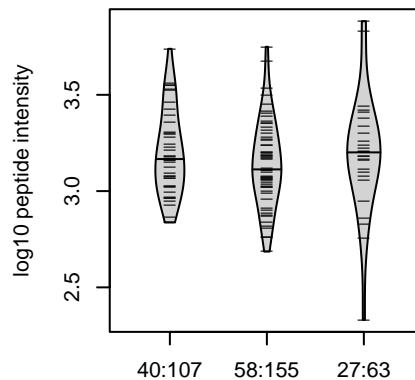

11:67334812:T:C\_T  
p = 0.99, beta = 0.000901, N = 125

**MLLADQGQSWK pc2  
A8MX94;P09211**

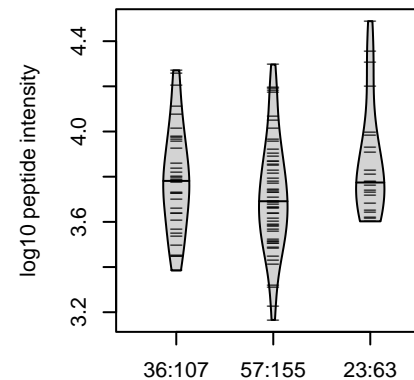

11:67334812:T:C\_T  
p = 0.29, beta = 0.135, N = 116

**PPYTVVYFPVR pc2  
A0A2R8Y5E5;A8MX94;P09211**

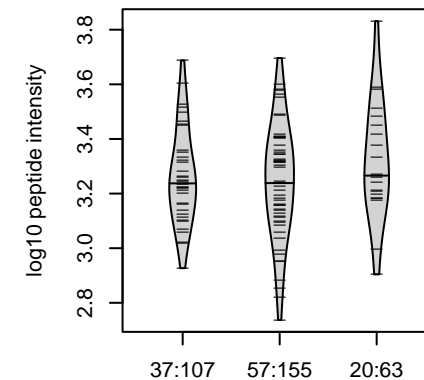

11:67334812:T:C\_T  
p = 0.39, beta = 0.114, N = 114

Assay Target: GSTP1  
Olink UniProt: P09211  
deCODE rsID: rs1254123  
Proxy rsID: rs1254123  
deCODE: 11:67567341:C:T  
Proxy SNP: 11:67334812:T:C  
deCODE log10(p): 55.9  
deCODE BETA: -0.13  
\*:-\*:--\*:--\*:--\*:NA  
967:800:698:438:354:323:269:1

**YVSLIYTNYEAGK pc2  
rs1695 ALT**

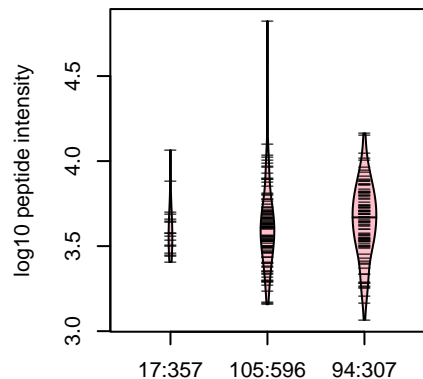

11:67334812:T:C\_T  
p = 1.4e-15, model = REC, N = 216

**YISLIYTNYEAGK pc2  
rs1695 REF**

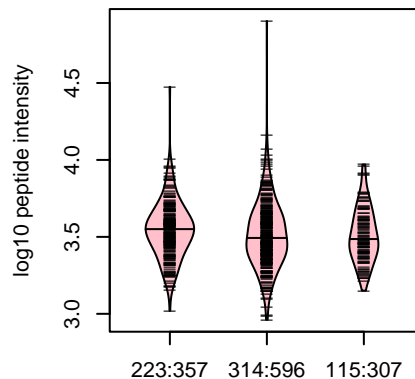

11:67334812:T:C\_T  
p = 9.5e-09, model = DOM, N = 652

**YISLIYTNYEAGKDDYVK pc3  
rs1695 REF**

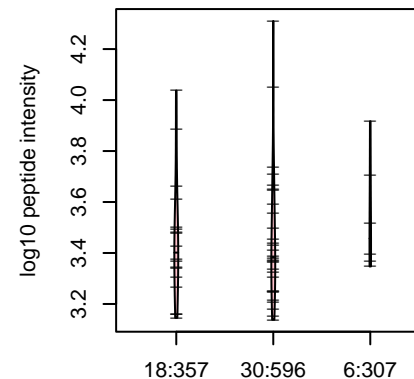

11:67334812:T:C\_T  
p = 0.022, model = DOM, N = 54

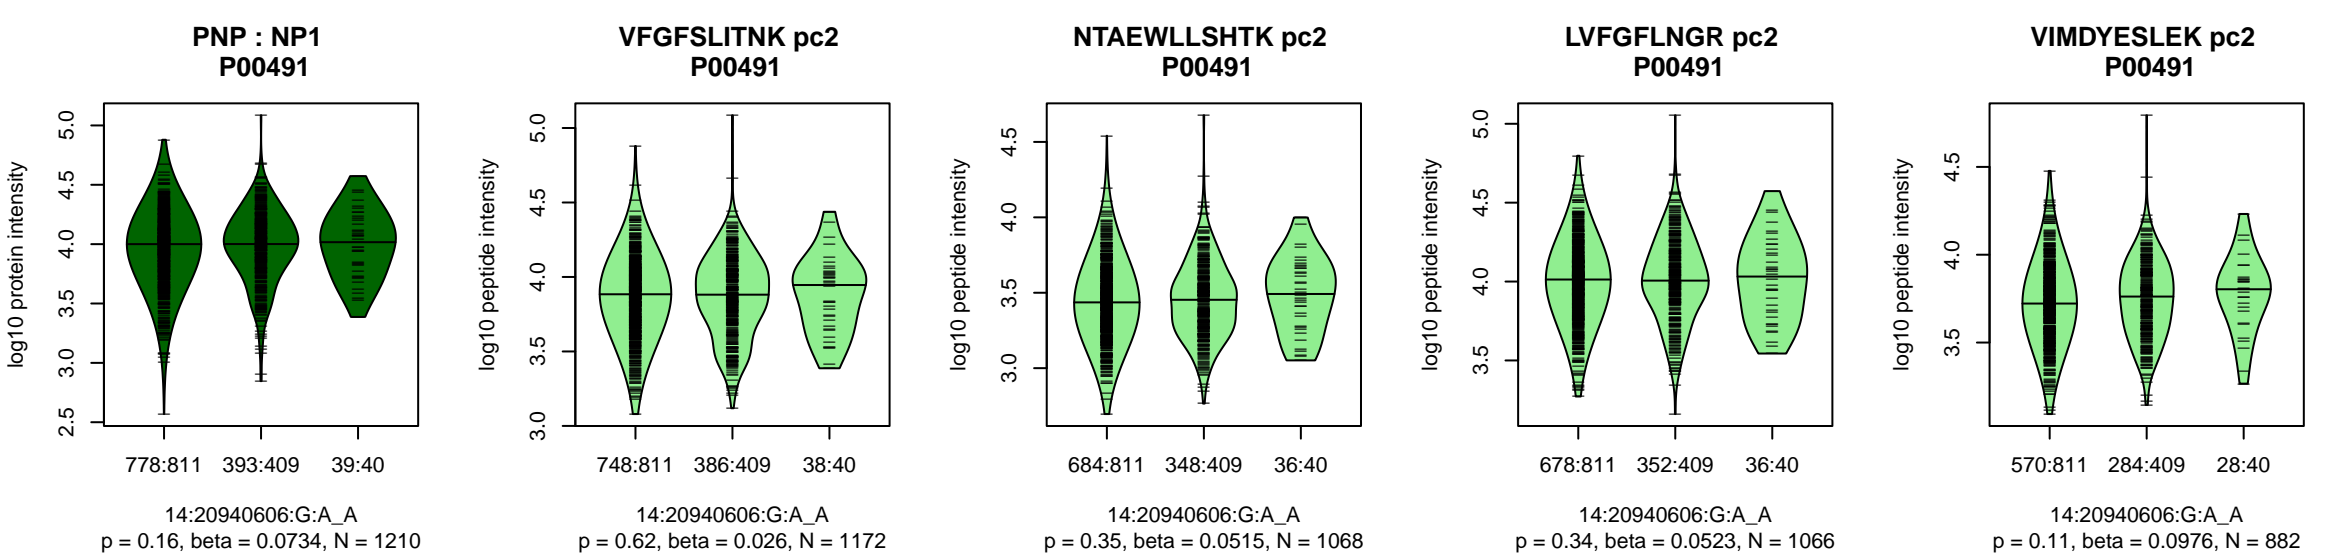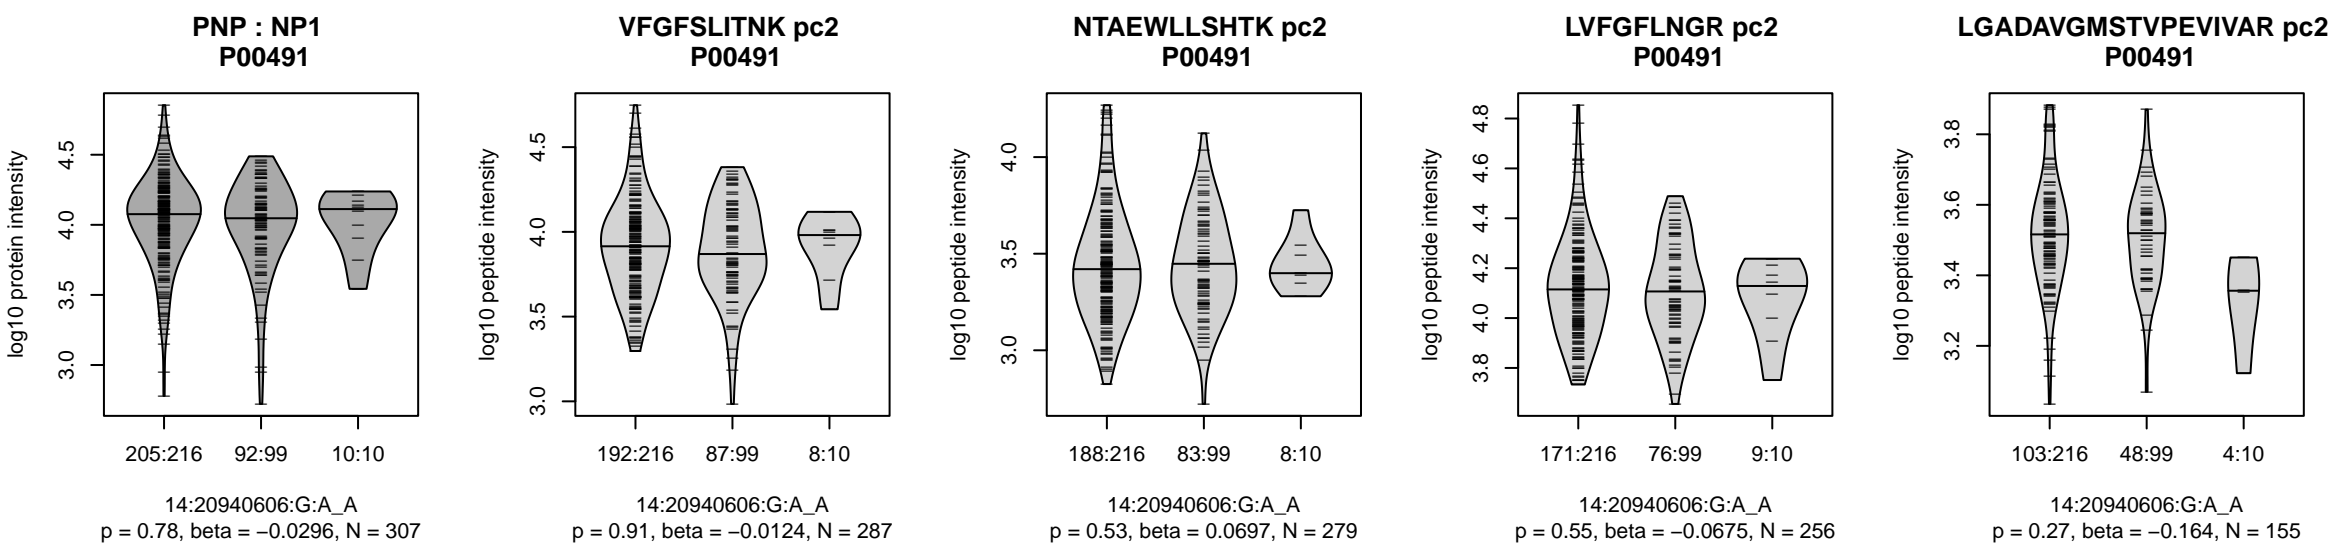

Assay Target: PNP  
 Olink UniProt: P00491  
 deCODE rsID: rs1049564  
 Proxy rsID: rs1049564  
 deCODE: 14:20472447:A:G  
 Proxy SNP: 14:20940606:G:A  
 deCODE log10(p): 55  
 deCODE BETA: -0.17  
 -----  
 1172:1068:1066:882:856:452:33

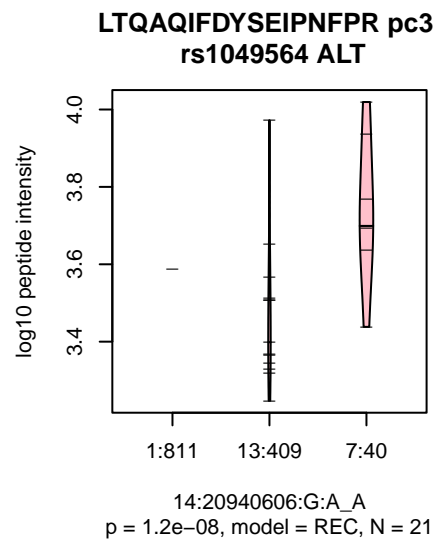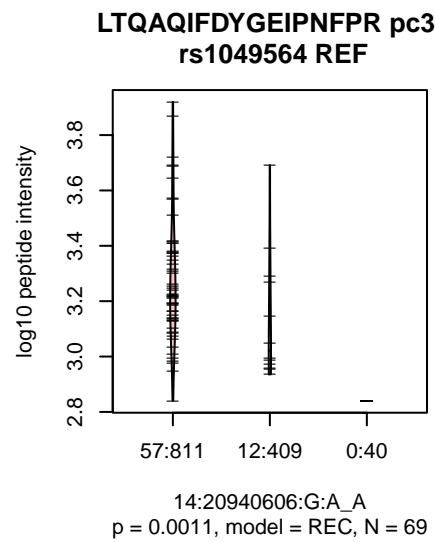



**ESM1 : NP2  
Q9NQ30**

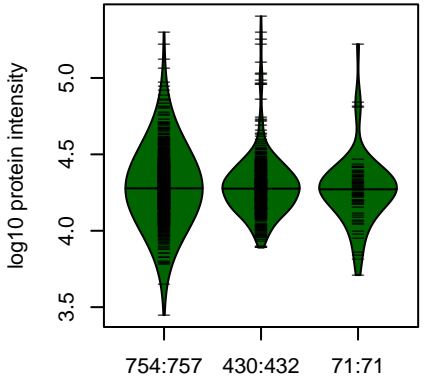

5:54198775:T:C\_T  
p = 0.37, beta = -0.0418, N = 1255

**FPPFQYSVTK pc2  
Q9NQ30**

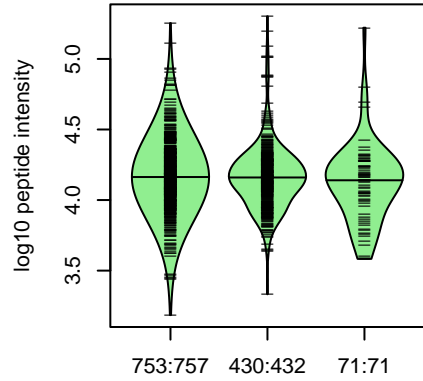

5:54198775:T:C\_T  
p = 0.04, beta = -0.096, N = 1254

**TVLDDCGCCR pc2  
Q9NQ30;Q9NQ30-2**

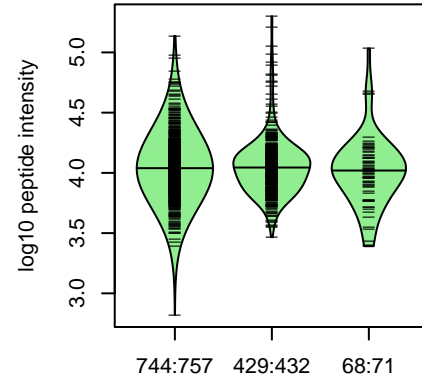

5:54198775:T:C\_T  
p = 0.13, beta = -0.0721, N = 1241

**ENAAGSPVMR pc2  
Q9NQ30;Q9NQ30-2**

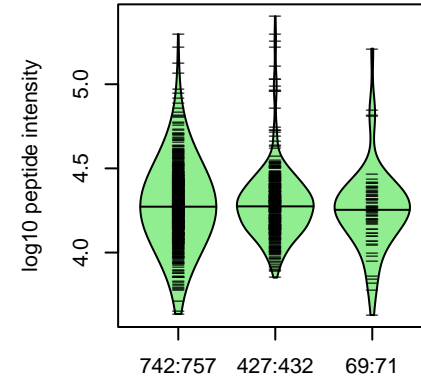

5:54198775:T:C\_T  
p = 0.34, beta = -0.0455, N = 1238

**DCPYGTFGMDCR pc2  
Q9NQ30**

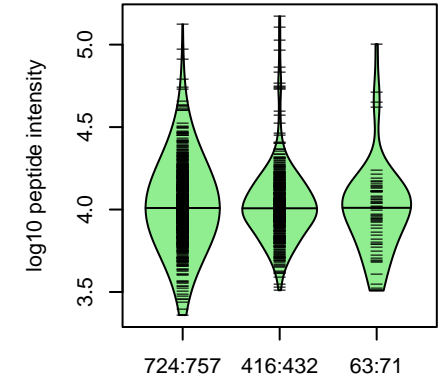

5:54198775:T:C\_T  
p = 0.21, beta = -0.061, N = 1203

**ESM1 : NP2  
Q9NQ30**

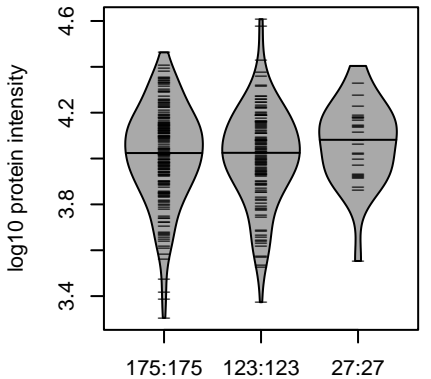

5:54198775:T:C\_T  
p = 0.66, beta = 0.0373, N = 325

**FPPFQYSVTK pc2  
Q9NQ30**

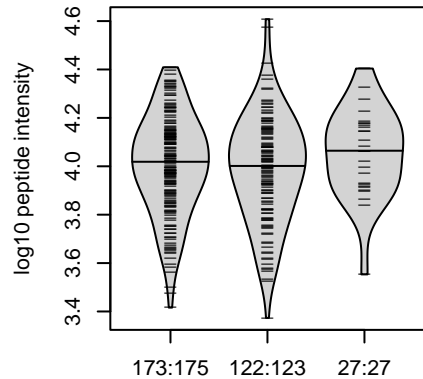

5:54198775:T:C\_T  
p = 0.72, beta = 0.031, N = 322

**TVLDDCGCCR pc2  
Q9NQ30;Q9NQ30-2**

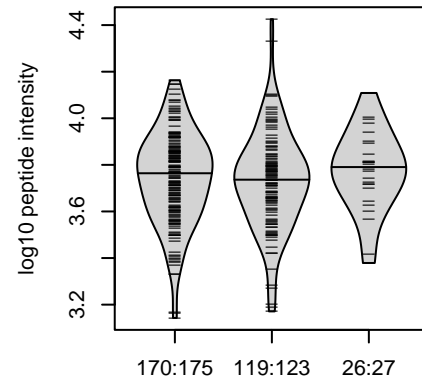

5:54198775:T:C\_T  
p = 0.9, beta = -0.0111, N = 315

**ETCNCQSGICDR pc2  
Q9NQ30**

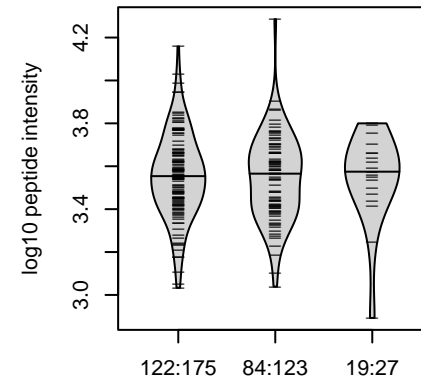

5:54198775:T:C\_T  
p = 0.74, beta = -0.0338, N = 225

**DCPYGTFGMDCR pc2  
Q9NQ30**

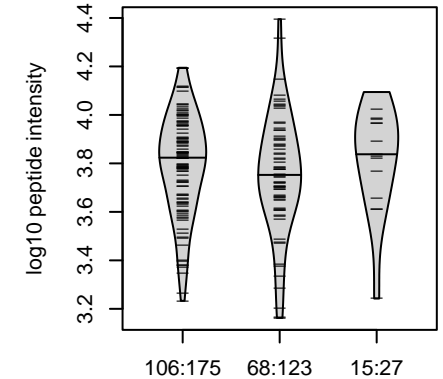

5:54198775:T:C\_T  
p = 0.65, beta = -0.0511, N = 189

Assay Target: ESM1  
Olink UniProt: Q9NQ30  
deCODE rsID: rs4242051  
Proxy rsID: rs4242051  
deCODE: 5:54902947:T:C  
Proxy SNP: 5:54198775:T:C  
deCODE log10(p): 54.7  
deCODE BETA: -0.15  
-----  
1254:1241:1238:1203:1146:998



**FGG : NP4**  
**P02679**

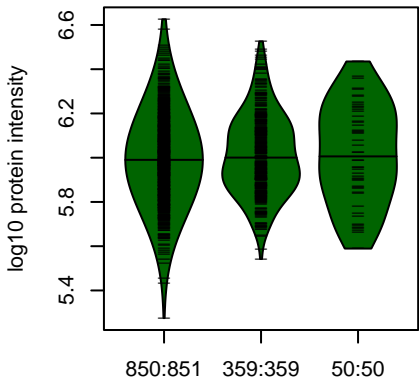

4:155491759:G:A\_A  
p = 0.17, beta = 0.0693, N = 1259

**ASTPNGYDNGIHWATWK pc2**  
**C9JC84;C9JEU5;P02679;P02679-**

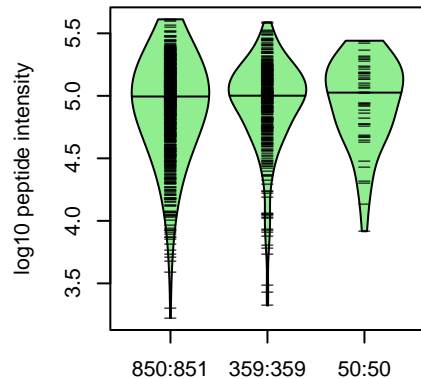

4:155491759:G:A\_A  
p = 0.34, beta = 0.0478, N = 1259

**DNCCILDER pc2**  
**C9JC84;C9JEU5;P02679;P02679-**

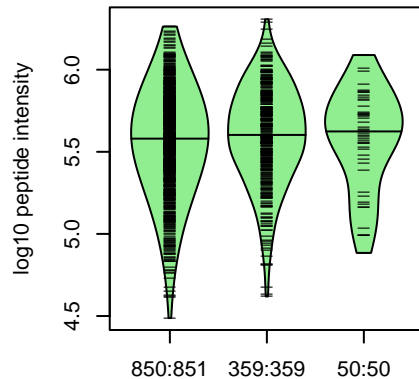

4:155491759:G:A\_A  
p = 0.12, beta = 0.0787, N = 1259

**FGSYCPTTCGIADFLSTYQTK pc3**  
**C9JC84;C9JEU5;P02679;P02679-**

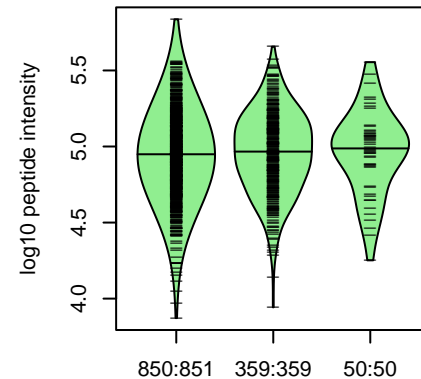

4:155491759:G:A\_A  
p = 0.2, beta = 0.065, N = 1259

**IHLISTQSAIPYALRVELEDWNGR pc2**  
**C9JC84;C9JEU5;P02679;P02679-**

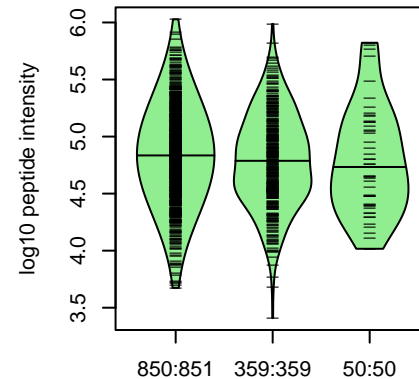

4:155491759:G:A\_A  
p = 0.088, beta = -0.0858, N = 1259

**FGG : NP4**  
**P02679;P02679-2**

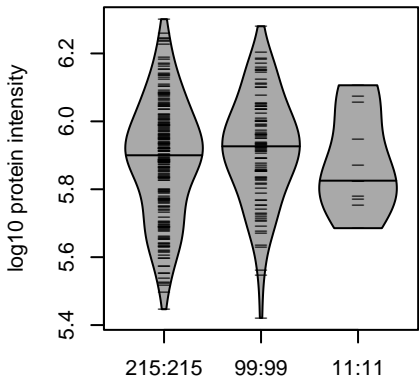

4:155491759:G:A\_A  
p = 0.65, beta = 0.0455, N = 325

**AIQLTYNPDESSK pc2**  
**C9JC84;C9JEU5;P02679;P02679-**

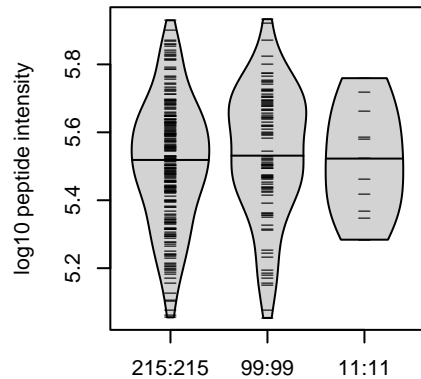

4:155491759:G:A\_A  
p = 0.65, beta = 0.0454, N = 325

**ASTPNGYDNGIHWATWK pc2**  
**C9JC84;C9JEU5;P02679;P02679-**

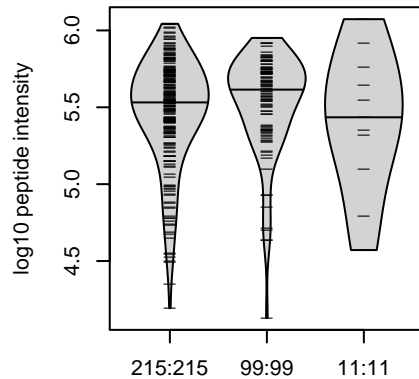

4:155491759:G:A\_A  
p = 0.28, beta = 0.108, N = 325

**CHAGHLNGVYYQGGTYSK pc3**  
**C9JC84;C9JEU5;P02679;P02679-**

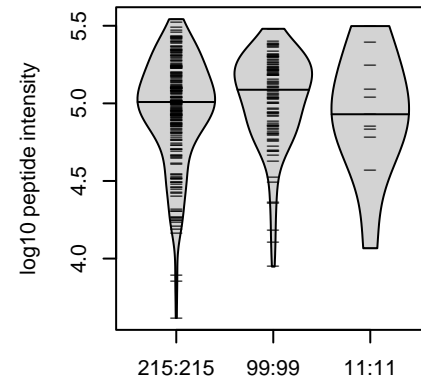

4:155491759:G:A\_A  
p = 0.23, beta = 0.12, N = 325

**DCQDIANK pc2**  
**P02679;P02679-2**

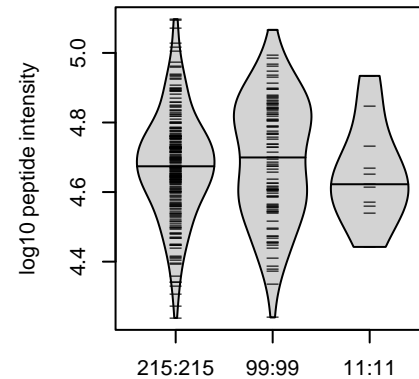

4:155491759:G:A\_A  
p = 0.91, beta = -0.0115, N = 325

Assay Target: FGG  
Olink UniProt: P02679  
deCODE rsID: rs4220  
Proxy rsID: rs4220  
deCODE: 4:154570607:A:G  
Proxy SNP: 4:155491759:G:A  
deCODE log10(p): 53.5  
deCODE BETA: 0.18  
-----  
1259:1259:1259:1259:1259:125

**C1QTNF3 : NP4  
Q9BXJ4-3**

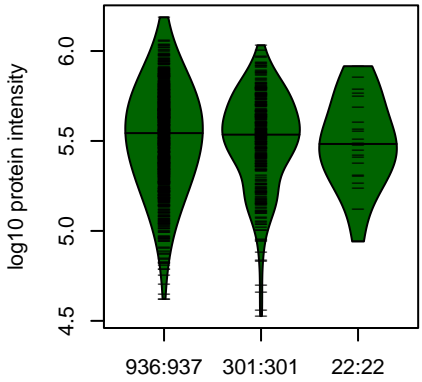

5:34018623:G:A\_A  
p = 0.32, beta = -0.0575, N = 1259

**CCHGDYSFR pc2  
E9PGA6;Q9BXJ4;Q9BXJ4-3**

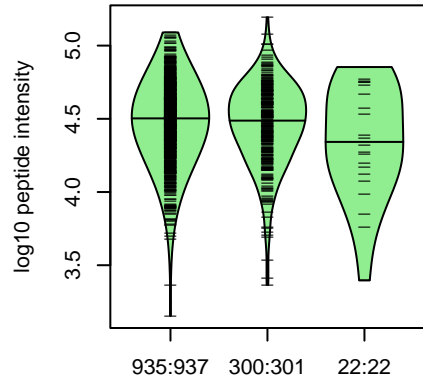

5:34018623:G:A\_A  
p = 0.052, beta = -0.113, N = 1257

**FSTFAGFLLFETK pc2  
E9PGA6;Q9BXJ4;Q9BXJ4-3**

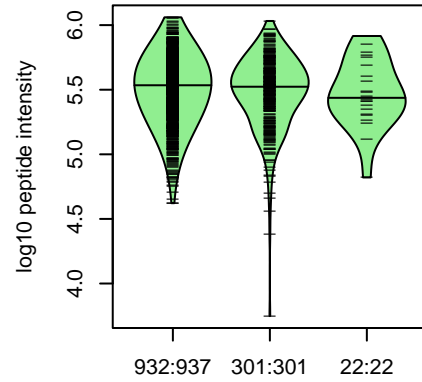

5:34018623:G:A\_A  
p = 0.22, beta = -0.0716, N = 1255

**SDTSSNHAVLK pc2  
E9PGA6;Q9BXJ4;Q9BXJ4-3**

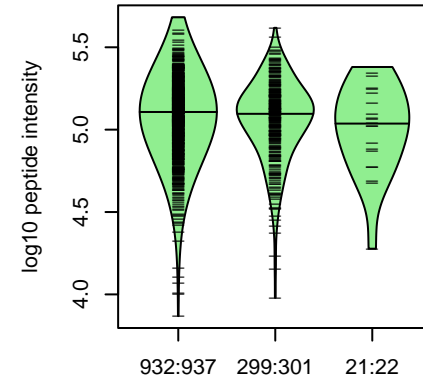

5:34018623:G:A\_A  
p = 0.11, beta = -0.0934, N = 1252

**MGNGALHGDHQR pc2  
E9PGA6;Q9BXJ4;Q9BXJ4-3**

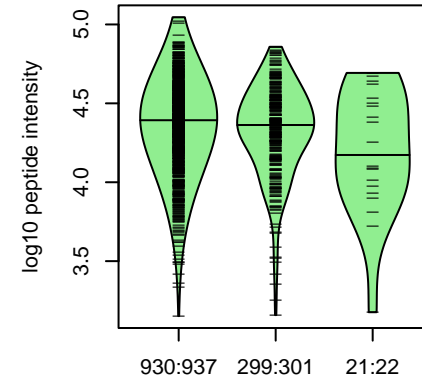

5:34018623:G:A\_A  
p = 0.015, beta = -0.143, N = 1250

**C1QTNF3 : NP4  
Q9BXJ4-3**

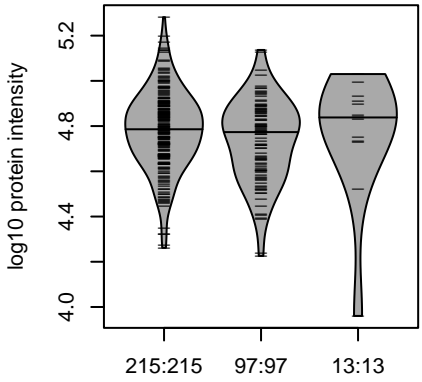

5:34018623:G:A\_A  
p = 0.39, beta = -0.0832, N = 325

**MGNGALHGDHQR pc3  
E9PGA6;Q9BXJ4;Q9BXJ4-3**

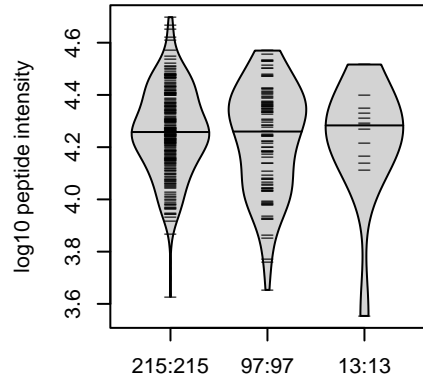

5:34018623:G:A\_A  
p = 0.61, beta = -0.0504, N = 325

**SDTSSNHAVLK pc2  
E9PGA6;Q9BXJ4;Q9BXJ4-3**

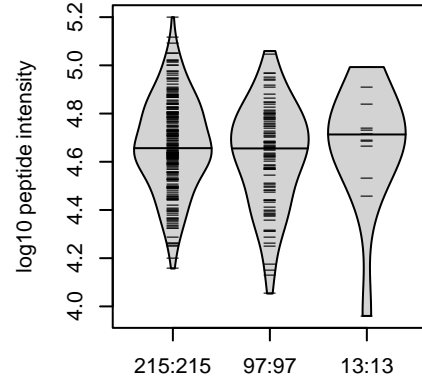

5:34018623:G:A\_A  
p = 0.48, beta = -0.0684, N = 325

**FSTFAGFLLFETK pc2  
E9PGA6;Q9BXJ4;Q9BXJ4-3**

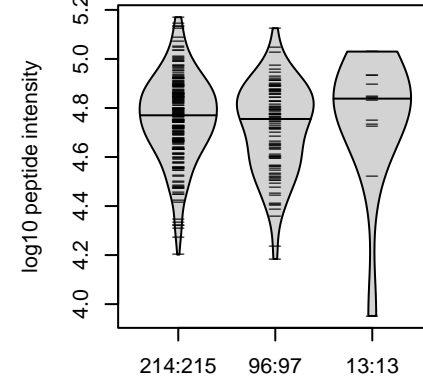

5:34018623:G:A\_A  
p = 0.45, beta = -0.0735, N = 323

**CCHGDYSFR pc2  
E9PGA6;Q9BXJ4;Q9BXJ4-3**

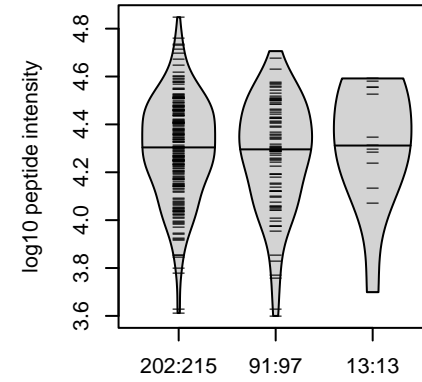

5:34018623:G:A\_A  
p = 0.8, beta = 0.0257, N = 306

Assay Target: C1QTNF3  
Olink UniProt: Q9BXJ4  
deCODE rsID: rs840390  
Proxy rsID: rs840390  
deCODE: 5:34018518:A:G  
Proxy SNP: 5:34018623:G:A  
deCODE log10(p): 53.4  
deCODE BETA: -0.18  
-----NA  
1257:1255:1255:1252:1250:125

**CXCL12 : NP4**  
P48061-4

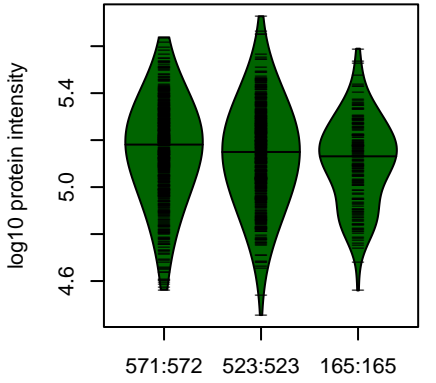

10:44893756:C:T\_C  
p = 0.024, beta = -0.0913, N = 1259

**ILNTPNCALQIVAR pc2**  
P48061;P48061-2;P48061-3;P48061

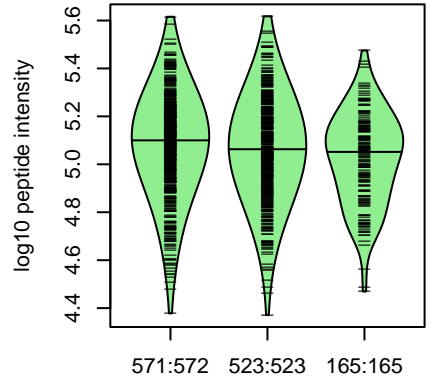

10:44893756:C:T\_C  
p = 0.0077, beta = -0.108, N = 1259

**WIQEYLEK pc2**

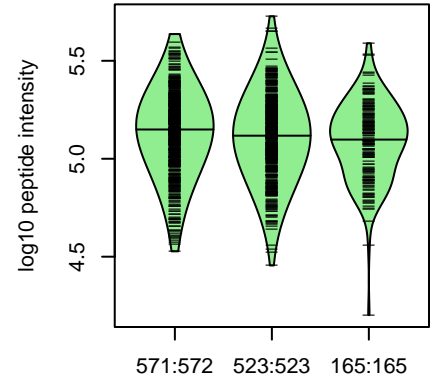

10:44893756:C:T\_C  
p = 0.03, beta = -0.0881, N = 1259

**FFESHVAR pc2**

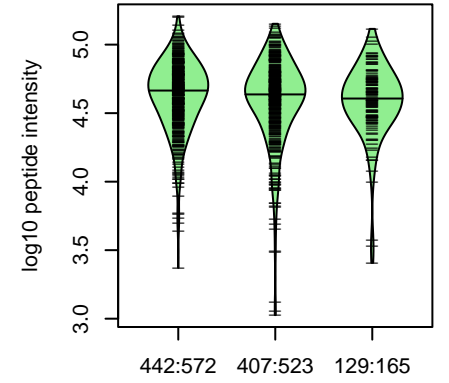

10:44893756:C:T\_C  
p = 0.061, beta = -0.0858, N = 978

**QVCIDPK pc2**

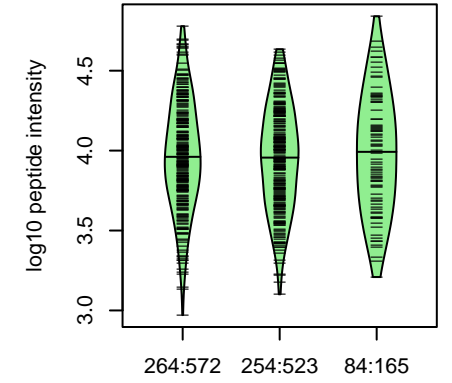

10:44893756:C:T\_C  
p = 0.84, beta = 0.0116, N = 602

**CXCL12 : NP4**

P48061;P48061-2;P48061-3;P48061

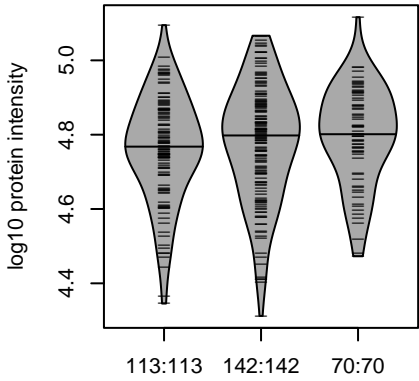

10:44893756:C:T\_C  
p = 0.12, beta = 0.115, N = 325

**ILNTPNCALQIVAR pc2**

P48061;P48061-2;P48061-3;P48061

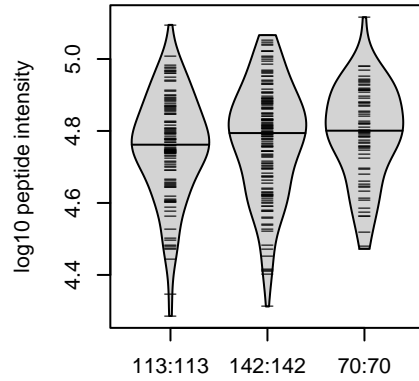

10:44893756:C:T\_C  
p = 0.11, beta = 0.117, N = 325

**WIQEYLEK pc2**

P48061;P48061-2;P48061-3;P48061

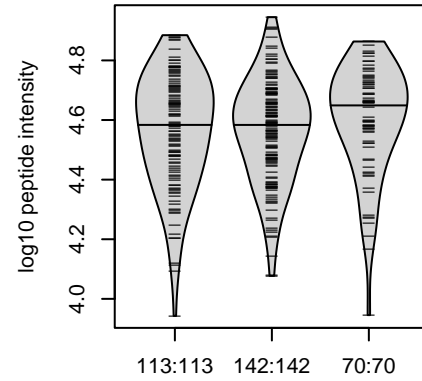

10:44893756:C:T\_C  
p = 0.28, beta = 0.0806, N = 325

**FFESHVAR pc2**

P48061;P48061-2;P48061-3;P48061

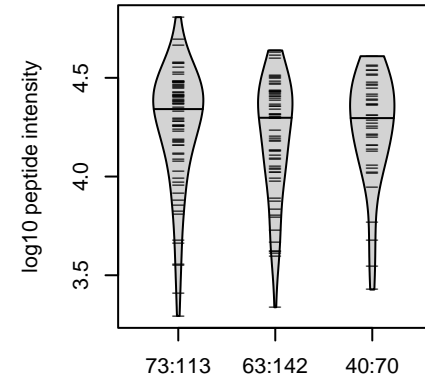

10:44893756:C:T\_C  
p = 0.67, beta = -0.0407, N = 176

**QVCIDPK pc2**

P48061;P48061-2;P48061-3;P48061

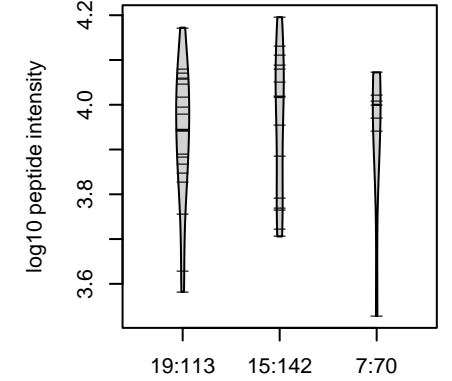

10:44893756:C:T\_C  
p = 0.91, beta = -0.0217, N = 41

Assay Target: CXCL12  
Olink UniProt: P48061  
deCODE rsID: rs1023264  
Proxy rsID: rs1023264  
deCODE: 10:44398308:C:T  
Proxy SNP: 10:44893756:C:T  
deCODE log10(p): 53.1  
deCODE BETA: 0.14  
\*:-:-:-  
1259:1259:978:602



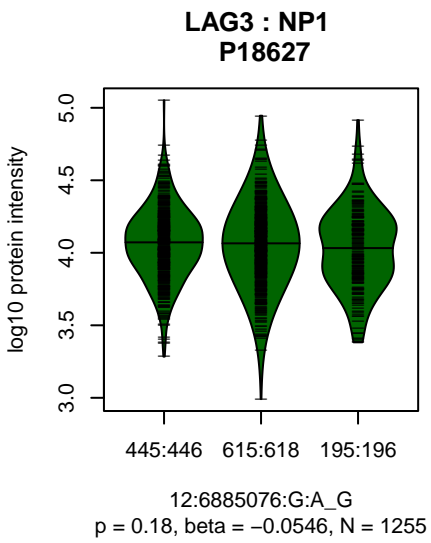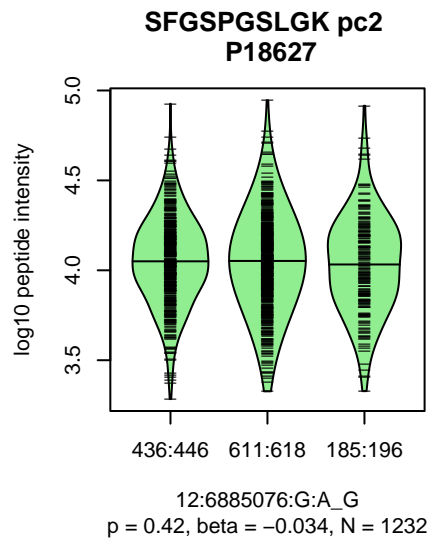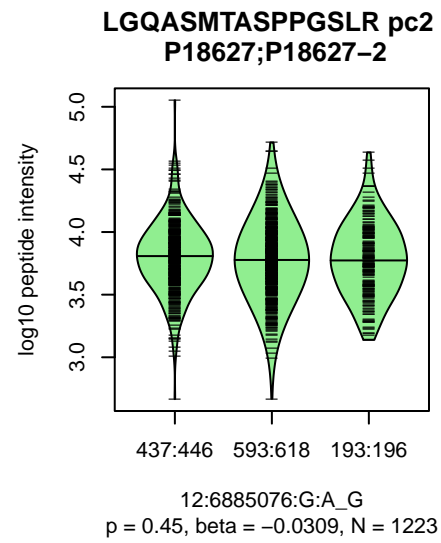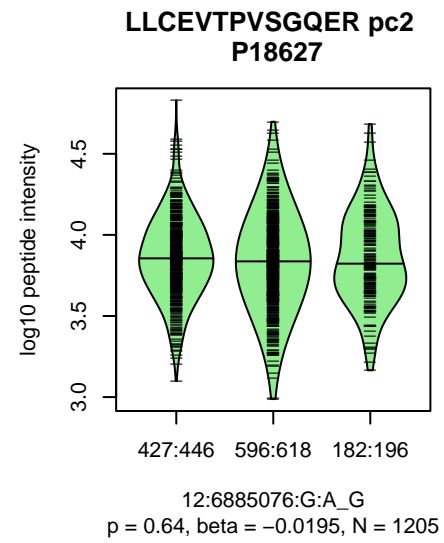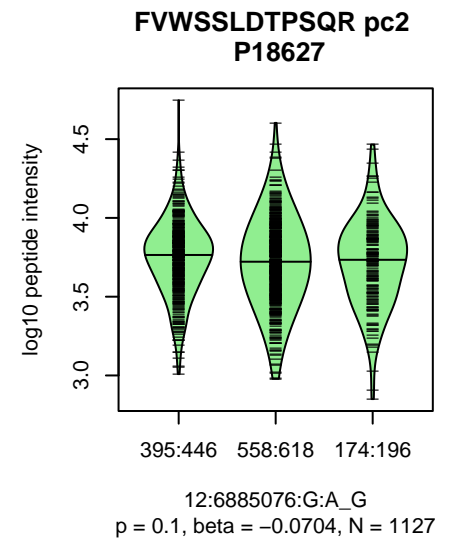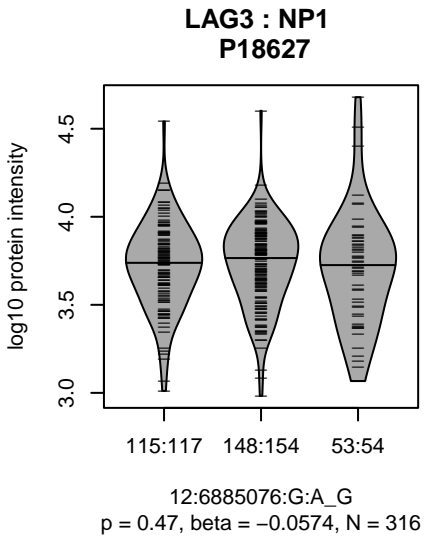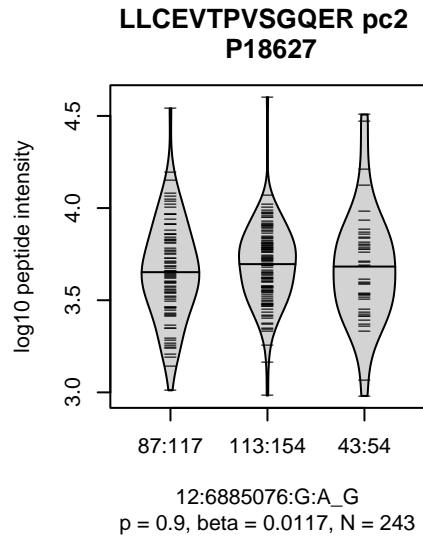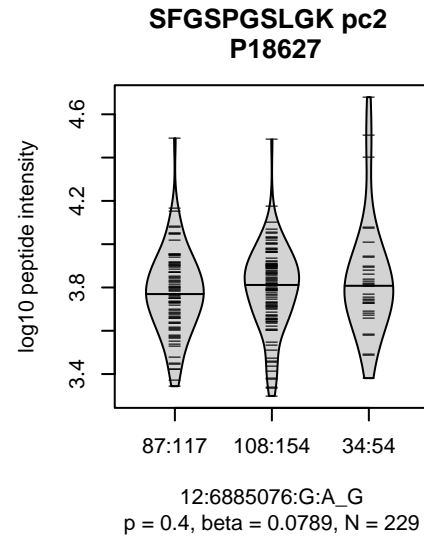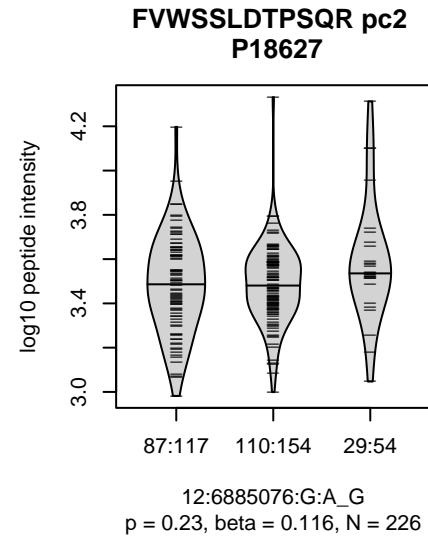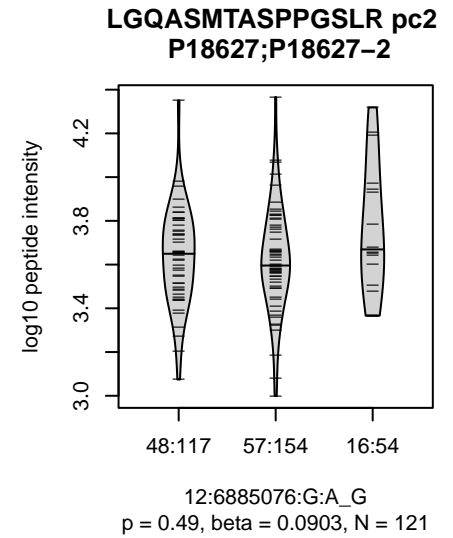

Assay Target: LAG3  
 Olink UniProt: P18627  
 deCODE rsID: rs3782735  
 Proxy rsID: rs3782735  
 deCODE: 12:6775910:G:A  
 Proxy SNP: 12:6885076:G:A  
 deCODE log10(p): 51.1  
 deCODE BETA: -0.13  
 - - - - -  
 1232:1223:1205:1127:651:92:59









**UBASH3B : NP4  
Q8TF42**

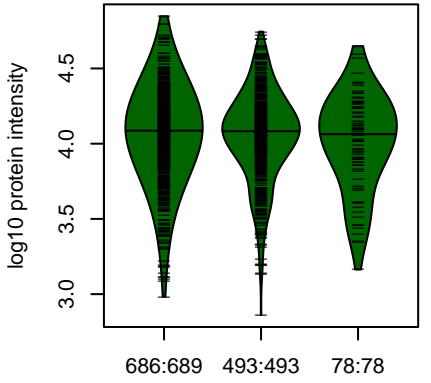

11:122523250:G:A\_A  
p = 0.19, beta = -0.0598, N = 1257

**LGCDWVATIFSR pc2  
Q8TF42**

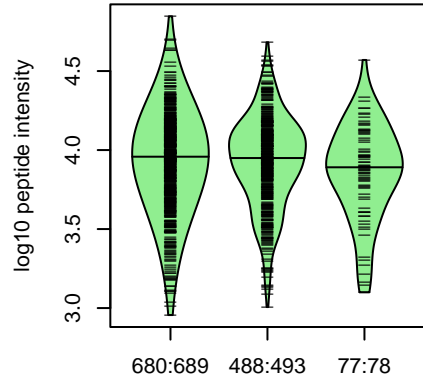

11:122523250:G:A\_A  
p = 0.26, beta = -0.0519, N = 1245

**IRVEPGLFEWTK pc3  
Q8TF42**

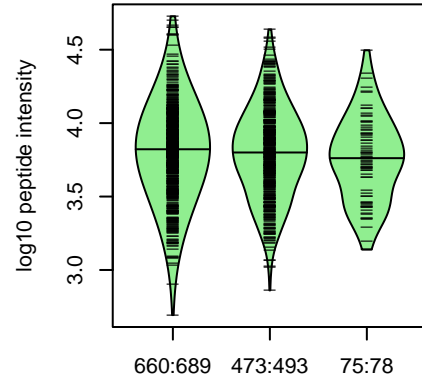

11:122523250:G:A\_A  
p = 0.28, beta = -0.0511, N = 1208

**HGSALDVLLSMGFPR pc3  
Q8TF42**

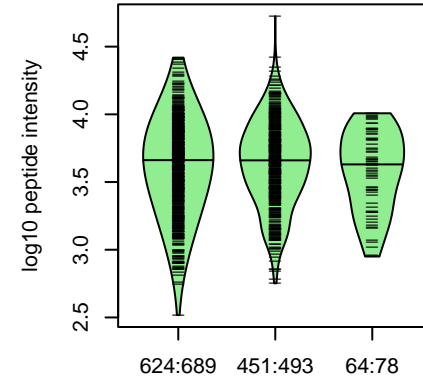

11:122523250:G:A\_A  
p = 0.82, beta = 0.0113, N = 1139

**YWLSQCFDAK pc2  
Q8TF42**

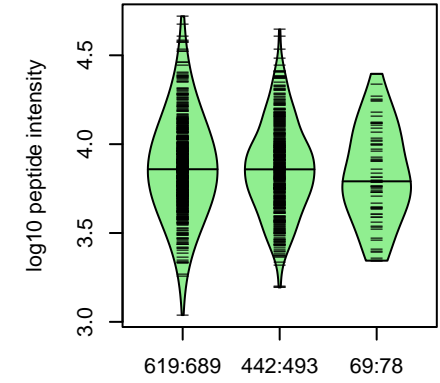

11:122523250:G:A\_A  
p = 0.077, beta = -0.0858, N = 1130

**UBASH3B : NP4  
Q8TF42**

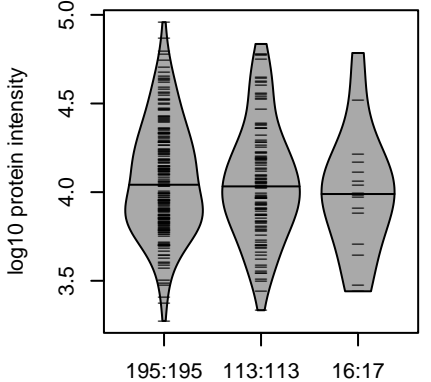

11:122523250:G:A\_A  
p = 0.39, beta = -0.0805, N = 324

**IRVEPGLFEWTK pc3  
Q8TF42**

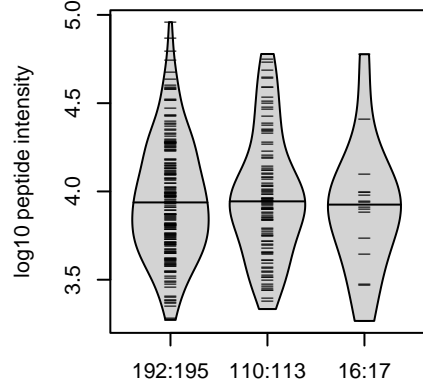

11:122523250:G:A\_A  
p = 0.82, beta = -0.0216, N = 318

**YWLSQCFDAK pc2  
Q8TF42**

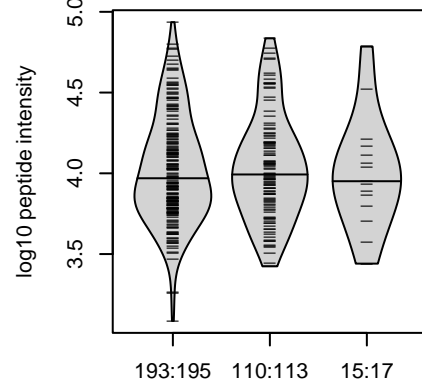

11:122523250:G:A\_A  
p = 0.88, beta = -0.0143, N = 318

**LGCDWVATIFSR pc2  
Q8TF42**

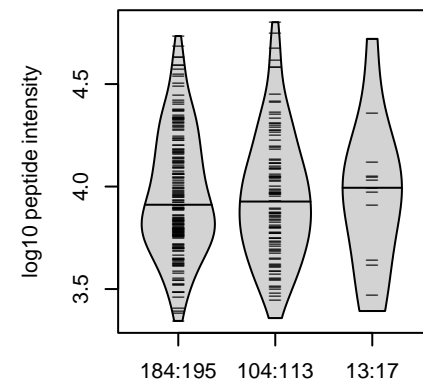

11:122523250:G:A\_A  
p = 0.9, beta = -0.0127, N = 301

**LVVSESYDTYISR pc2  
Q8TF42**

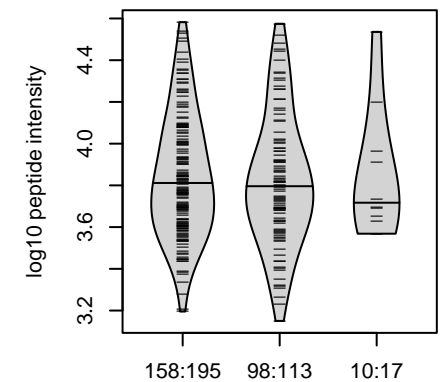

11:122523250:G:A\_A  
p = 0.75, beta = -0.0334, N = 266

Assay Target: UBASH3B  
Olink UniProt: Q8TF42  
deCODE rsID: rs11218735  
Proxy rsID: rs11218735  
deCODE: 11:122652542:A:G  
Proxy SNP: 11:122523250:G:A  
deCODE log10(p): 48.5  
deCODE BETA: -0.13  
-----  
1245:1208:1139:1130:1119:105

**USP15 : NP2  
Q9Y4E8**

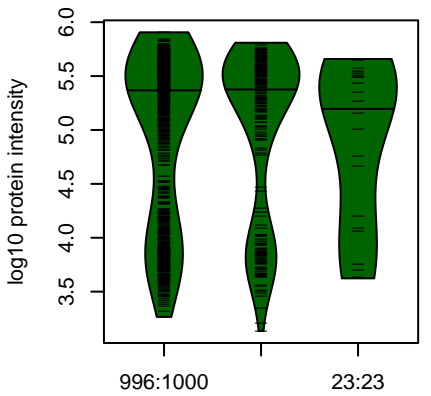

12:62731251:A:T\_T  
p = 0.81, beta = -0.0151, N = 1254

**LYNLLLLR pc2  
Q9Y4E8;Q9Y4E8-2**

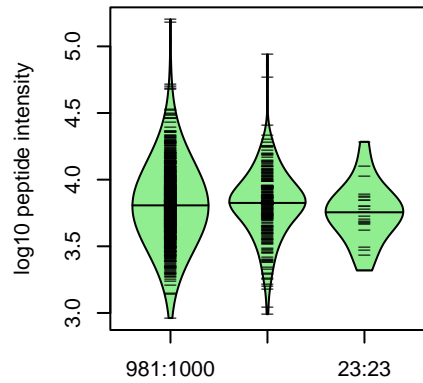

12:62731251:A:T\_T  
p = 0.54, beta = -0.0381, N = 1237

**VEVYLTELK pc2  
Q9Y4E8;Q9Y4E8-2;Q9Y4E8-4**

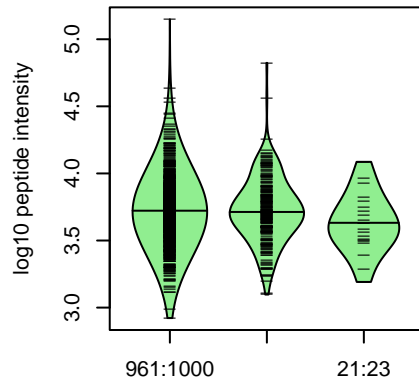

12:62731251:A:T\_T  
p = 0.3, beta = -0.0658, N = 1209

**TLEVYLVR pc2  
Q9Y4E8;Q9Y4E8-2**

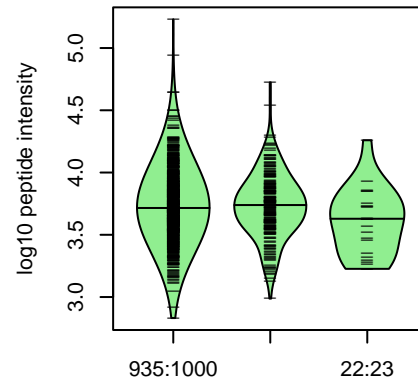

12:62731251:A:T\_T  
p = 0.14, beta = -0.0943, N = 1177

**KLDLWSLPPVLVVHLK pc3  
Q9Y4E8;Q9Y4E8-2**

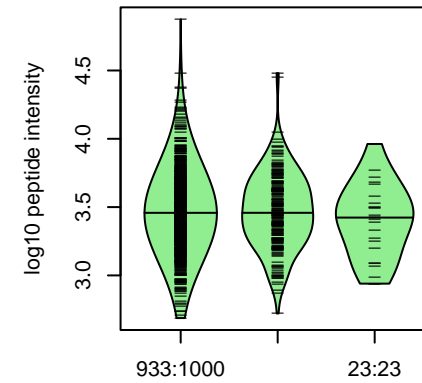

12:62731251:A:T\_T  
p = 0.62, beta = -0.0313, N = 1173

**USP15 : NP2  
Q9Y4E8**

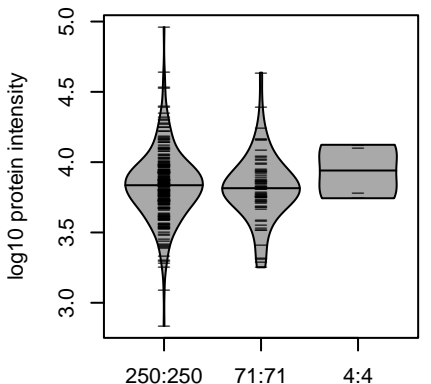

12:62731251:A:T\_T  
p = 0.98, beta = 0.00281, N = 325

**KLDLWSLPPVLVVHLK pc3  
Q9Y4E8;Q9Y4E8-2**

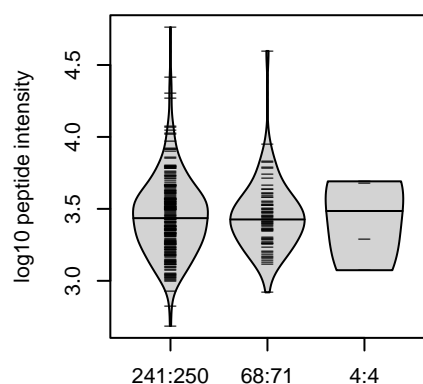

12:62731251:A:T\_T  
p = 0.89, beta = 0.0171, N = 313

**STLVCPECAK pc2  
Q9Y4E8;Q9Y4E8-2;Q13107;Q13107**

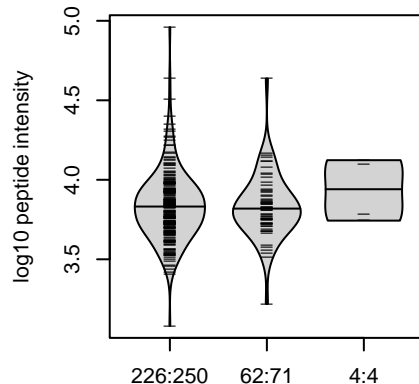

12:62731251:A:T\_T  
p = 0.52, beta = 0.0821, N = 292

**SFLALDWDPLK pc2  
Q9Y4E8;Q9Y4E8-2**

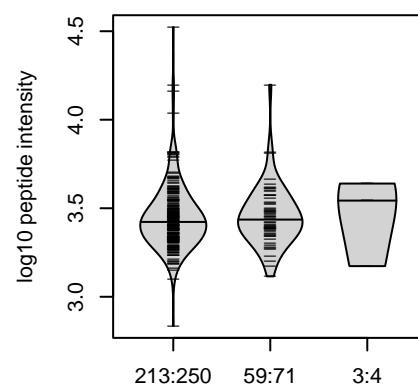

12:62731251:A:T\_T  
p = 0.48, beta = 0.0936, N = 275

**RNSIIVDIFHGLFK pc3  
Q9Y4E8;Q9Y4E8-2**

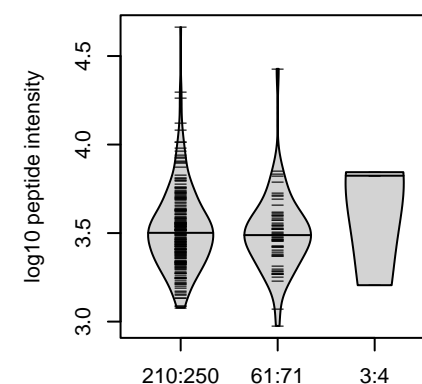

12:62731251:A:T\_T  
p = 0.87, beta = 0.0217, N = 274

Assay Target: USP15  
Olink UniProt: Q9Y4E8  
deCODE rsID: rs73136831  
Proxy rsID: rs73136831  
deCODE: 12:62337470:T:A  
Proxy SNP: 12:62731251:A:T  
deCODE log10(p): 48  
deCODE BETA: 0.2  
-----  
1237:1209:1177:1173:1167:115



**C5 : NP4**  
**P01031**

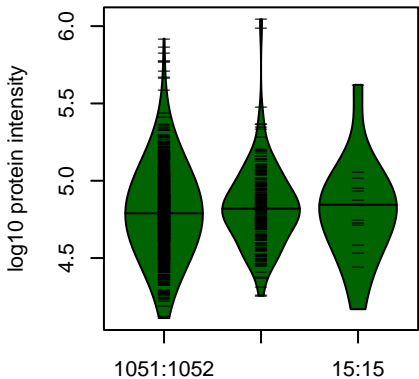

9:123787999:G:A\_A  
 $p = 0.35$ ,  $\beta = 0.063$ ,  $N = 1259$

**AFDICPLVK pc2**  
**P01031**

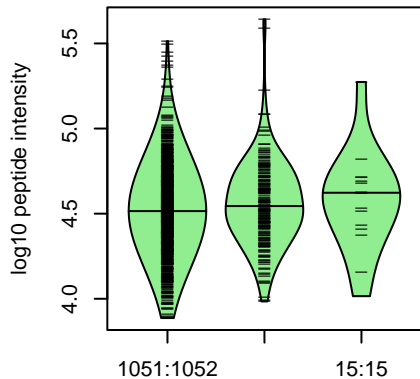

9:123787999:G:A\_A  
 $p = 0.1$ ,  $\beta = 0.112$ ,  $N = 1259$

**FQNSAILTIQPK pc2**  
**P01031**

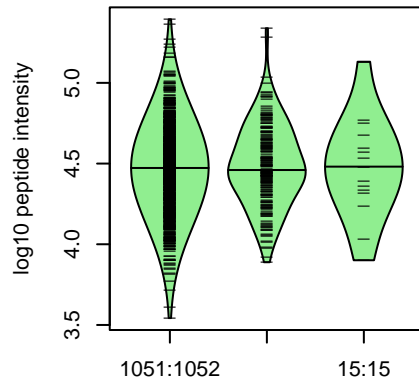

9:123787999:G:A\_A  
 $p = 0.77$ ,  $\beta = 0.0201$ ,  $N = 1259$

**LNLVATPLFLK pc2**  
**P01031**

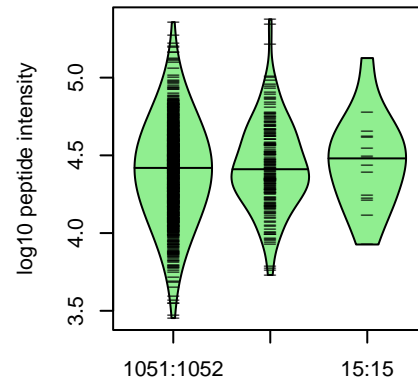

9:123787999:G:A\_A  
 $p = 0.16$ ,  $\beta = 0.0963$ ,  $N = 1259$

**VSITSITVENVFK pc2**  
**P01031**

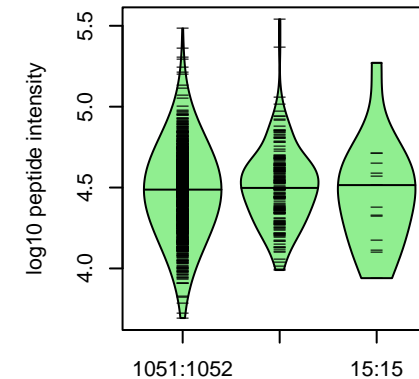

9:123787999:G:A\_A  
 $p = 0.54$ ,  $\beta = 0.0413$ ,  $N = 1259$

**C5 : NP4**  
**P01031**

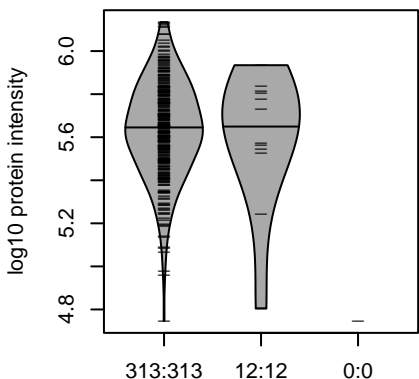

9:123787999:G:A\_A  
 $p = 0.59$ ,  $\beta = -0.156$ ,  $N = 325$

**AFDICPLVK pc2**  
**P01031**

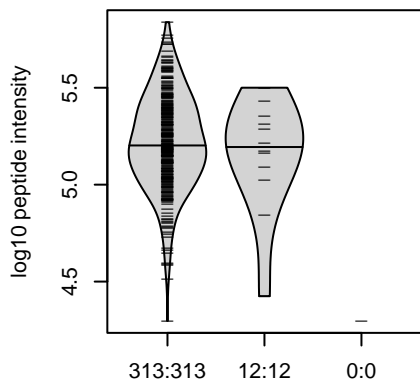

9:123787999:G:A\_A  
 $p = 0.4$ ,  $\beta = -0.246$ ,  $N = 325$

**AFTECCVVASQLR pc2**  
**P01031**

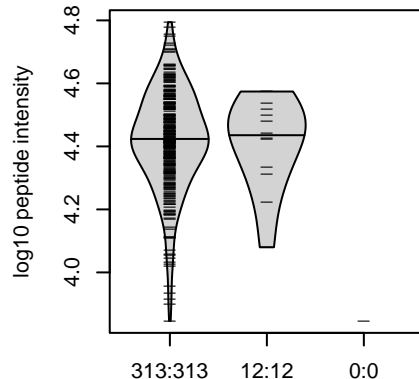

9:123787999:G:A\_A  
 $p = 0.64$ ,  $\beta = -0.136$ ,  $N = 325$

**AIAYSSLSQSPLYIDWTDNHK pc3**  
**P01031**

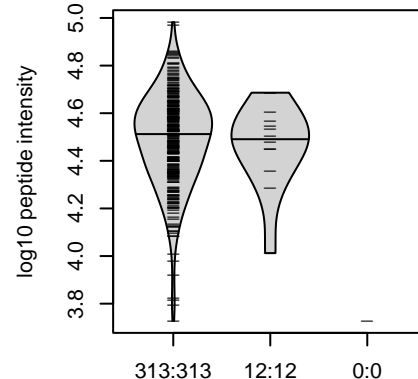

9:123787999:G:A\_A  
 $p = 0.26$ ,  $\beta = -0.328$ ,  $N = 325$

**ALLVGEHLNIIVTPK pc3**  
**P01031**

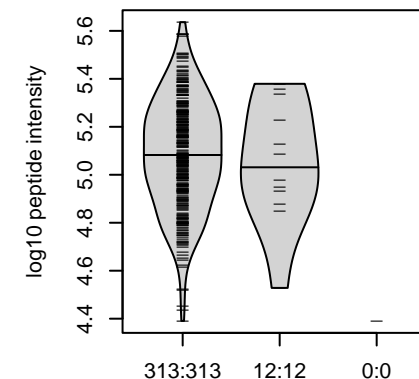

9:123787999:G:A\_A  
 $p = 0.44$ ,  $\beta = -0.224$ ,  $N = 325$

Assay Target: C5  
 Olink UniProt: P01031  
 deCODE rsID: rs17220750  
 Proxy rsID: rs17220750  
 deCODE: 9:121025721:A:G  
 Proxy SNP: 9:123787999:G:A  
 deCODE log10(p): 47.4  
 deCODE BETA: 0.19  
 -----  
 1259:1259:1259:1259:1258:125

**VARS : NP4**  
**P26640**

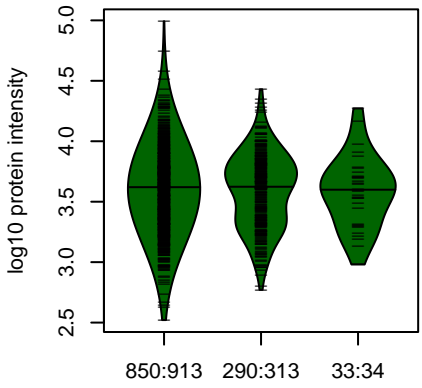

6:31941557:G:A\_A  
 $p = 0.55$ ,  $\beta = -0.0335$ ,  $N = 1173$

**SSAQDPQAVLGALGR pc2**  
**P26640**

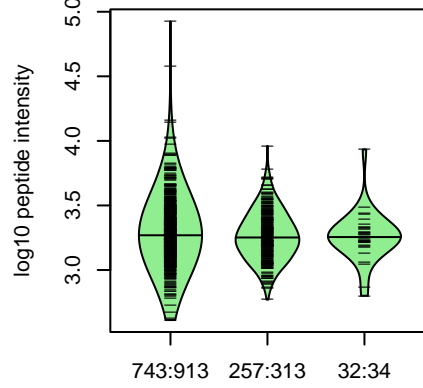

6:31941557:G:A\_A  
 $p = 0.13$ ,  $\beta = -0.0895$ ,  $N = 1032$

**GIEDNPMVVPLCNR pc2**  
**P26640**

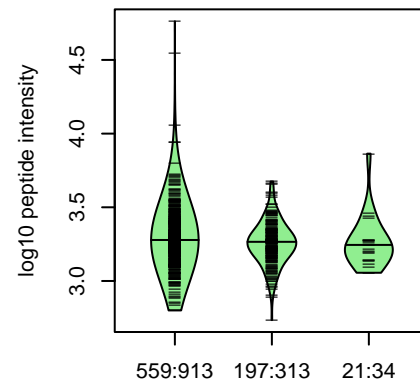

6:31941557:G:A\_A  
 $p = 0.024$ ,  $\beta = -0.155$ ,  $N = 777$

**IETMLGDVAVAVHPK pc3**  
**P26640**

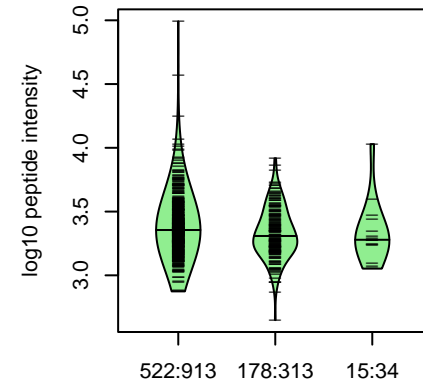

6:31941557:G:A\_A  
 $p = 0.005$ ,  $\beta = -0.209$ ,  $N = 715$

**LSAAVTEAFVVR pc2**  
**P26640**

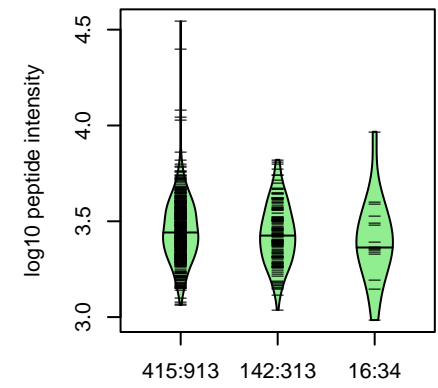

6:31941557:G:A\_A  
 $p = 0.088$ ,  $\beta = -0.137$ ,  $N = 573$

**VARS : NP4**  
**P26640**

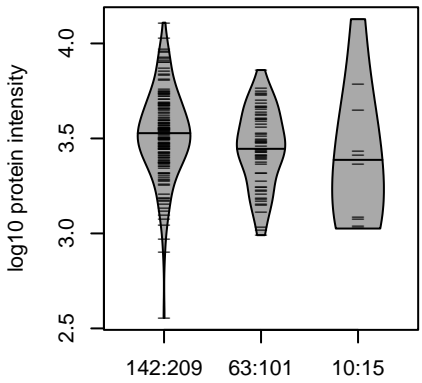

6:31941557:G:A\_A  
 $p = 0.009$ ,  $\beta = -0.303$ ,  $N = 215$

**VPLEVQEADK pc2**  
**P26640**

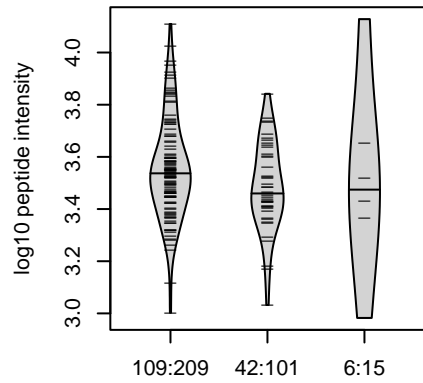

6:31941557:G:A\_A  
 $p = 0.051$ ,  $\beta = -0.277$ ,  $N = 157$

**SSAQDPQAVLGALGR pc2**  
**P26640**

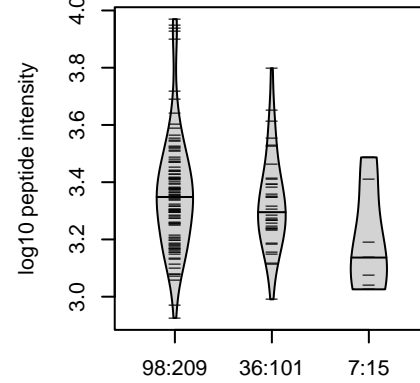

6:31941557:G:A\_A  
 $p = 0.047$ ,  $\beta = -0.283$ ,  $N = 141$

**DVVEPLLRPQWYVR pc3**  
**P26640**

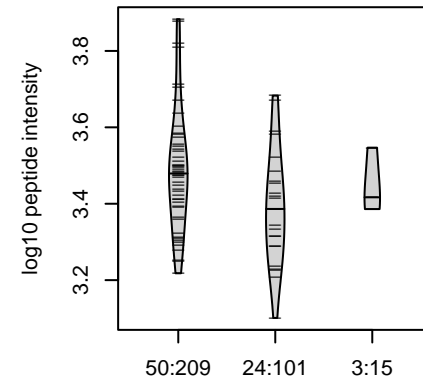

6:31941557:G:A\_A  
 $p = 0.053$ ,  $\beta = -0.376$ ,  $N = 77$

**CGEMAQAASAVTR pc2**  
**P26640**

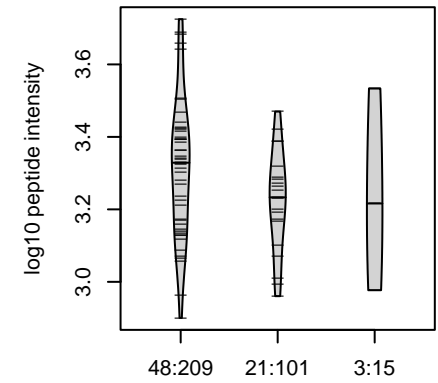

6:31941557:G:A\_A  
 $p = 0.056$ ,  $\beta = -0.38$ ,  $N = 72$

Assay Target: VARS  
Olink UniProt: P26640  
deCODE rsID: rs550671  
Proxy rsID: rs387608  
deCODE: 6:31976816:T:C  
Proxy SNP: 6:31941557:G:A  
deCODE log10(p): 47.3  
deCODE BETA: 0.17  
-----\*-----  
1032:777:715:573:566:528:510:

**REG4 : NP3  
Q9BYZ8**

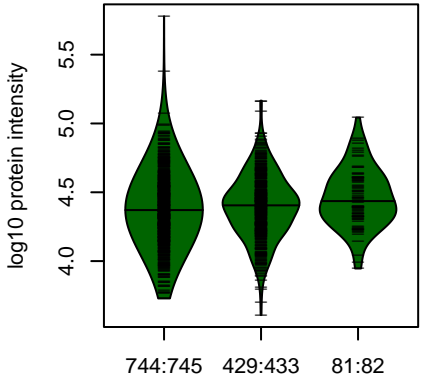

1:120378678:C:T\_C  
p = 0.0035, beta = 0.133, N = 1254

**EASTIAEYISGYQR pc2  
E9PNV6;Q9BYZ8**

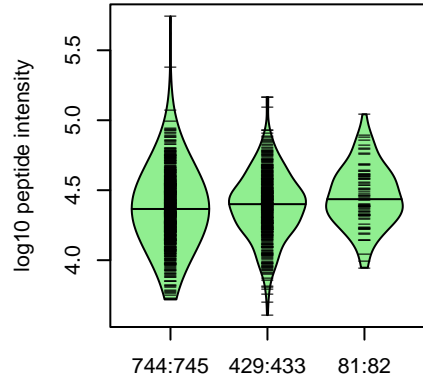

1:120378678:C:T\_C  
p = 0.002, beta = 0.141, N = 1254

**SQPIWIGLHDPQK pc3  
E9PNV6;Q9BYZ8**

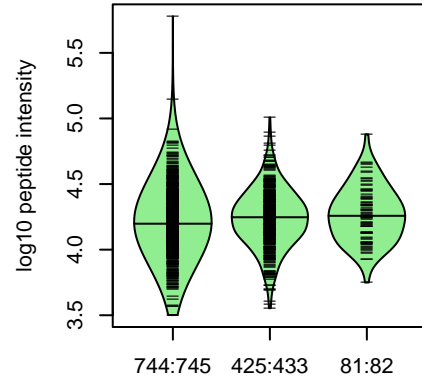

1:120378678:C:T\_C  
p = 0.022, beta = 0.105, N = 1250

**SNCYGYFR pc2  
E9PNV6;Q9BYZ8;Q9BYZ8-2**

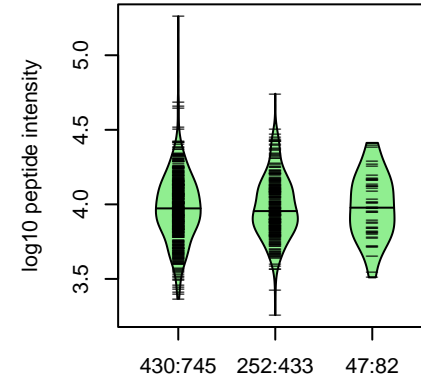

1:120378678:C:T\_C  
p = 0.85, beta = 0.0112, N = 729

**RNWSDAELECQSYGNGAHLASILSLK  
E9PNV6;Q9BYZ8**

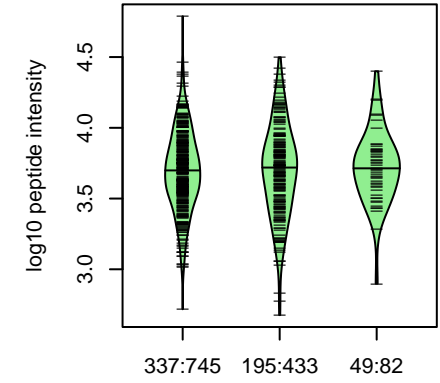

1:120378678:C:T\_C  
p = 0.7, beta = 0.0249, N = 581

**EASTIAEYISGYQR pc2  
E9PNV6;Q9BYZ8**

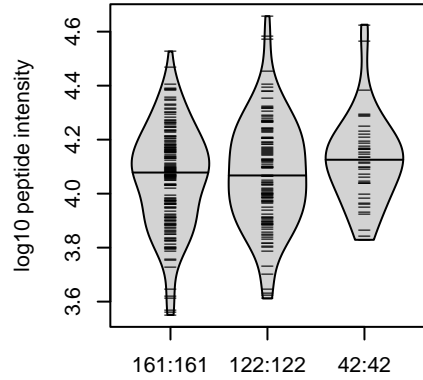

1:120378678:C:T\_C  
p = 0.034, beta = 0.165, N = 325

**SQPIWIGLHDPQK pc3  
E9PNV6;Q9BYZ8**

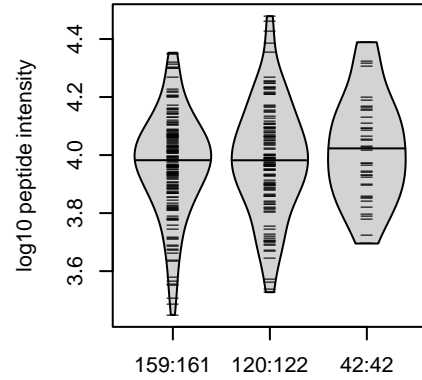

1:120378678:C:T\_C  
p = 0.062, beta = 0.146, N = 321

**RNWSDAELECQSYGNGAHLASILSLK  
E9PNV6;Q9BYZ8**

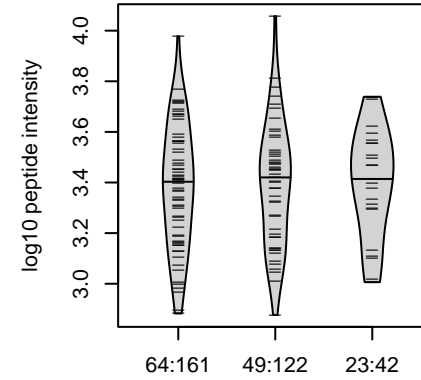

1:120378678:C:T\_C  
p = 0.9, beta = 0.0135, N = 136

Assay Target: REG4  
Olink UniProt: Q9BYZ8  
deCODE rsID: rs3009182  
Proxy rsID: rs3009182  
deCODE: 1:119836055:C:T  
Proxy SNP: 1:120378678:C:T  
deCODE log10(p): 45.6  
deCODE BETA: 0.14  
\*:-\*:--:-:-:-:-:-:-NA  
1254:1250:1175:1156:729:581:4



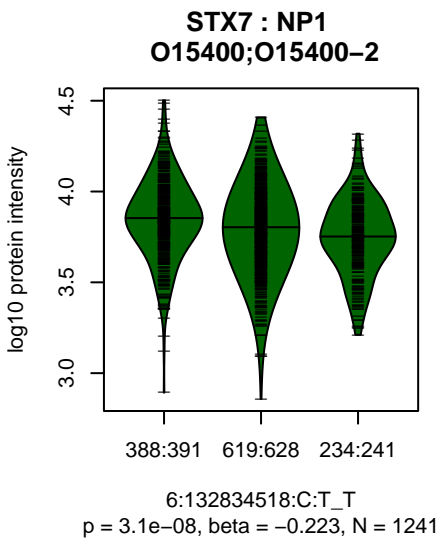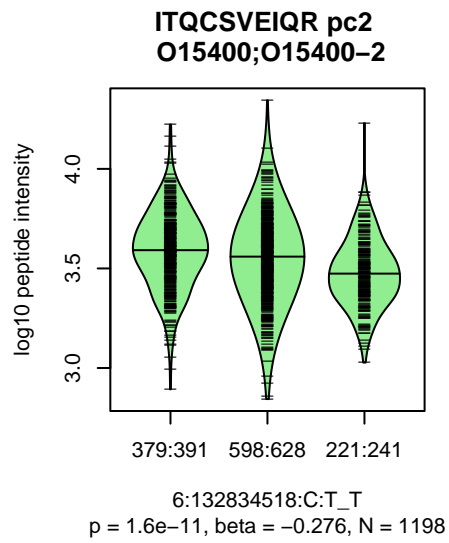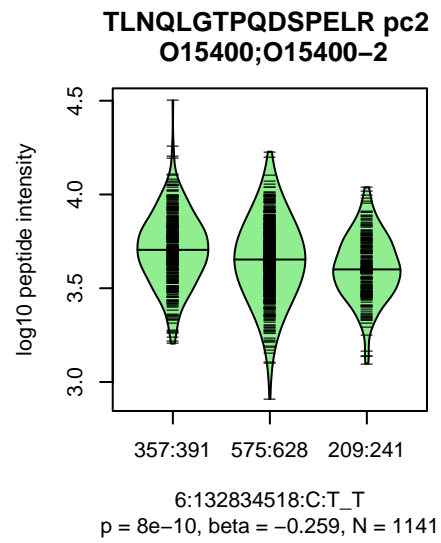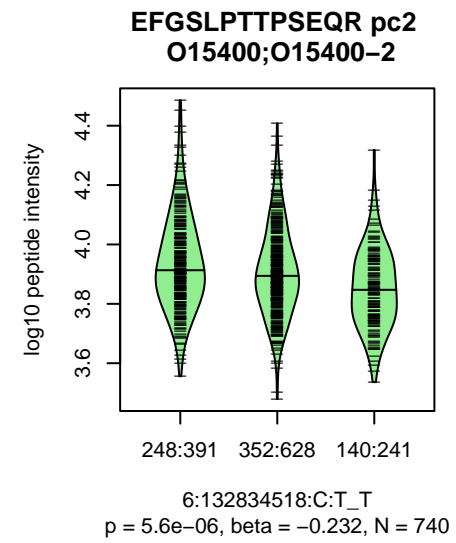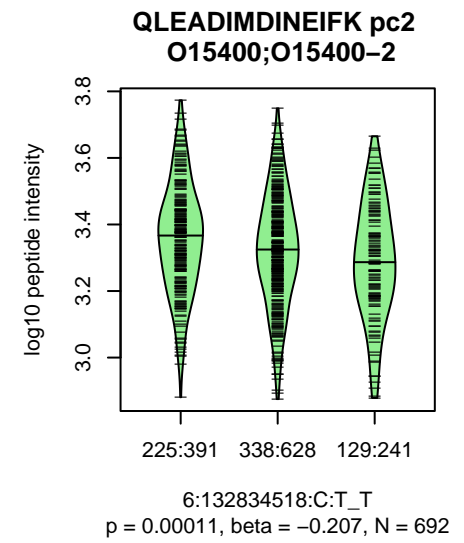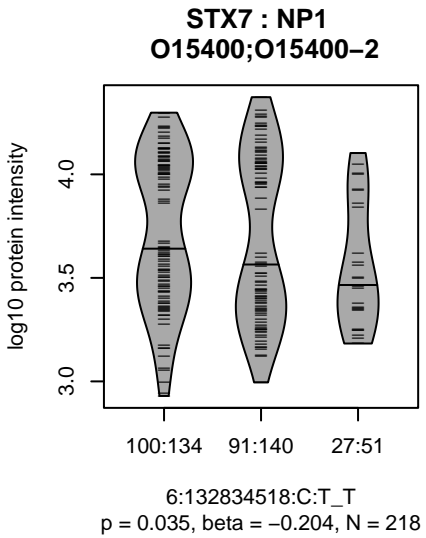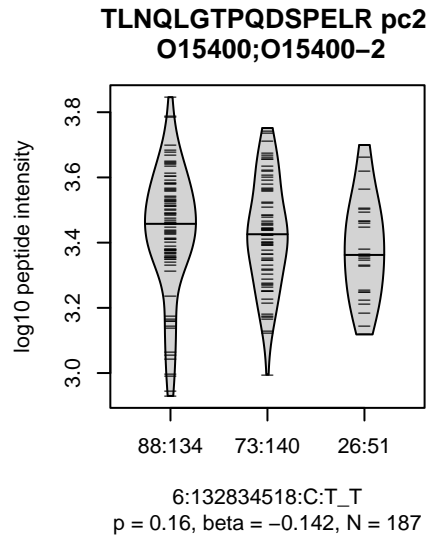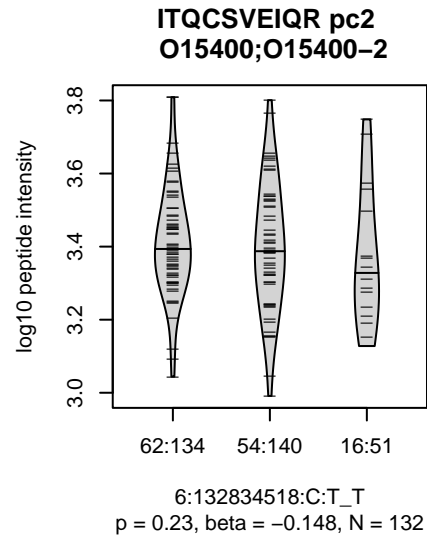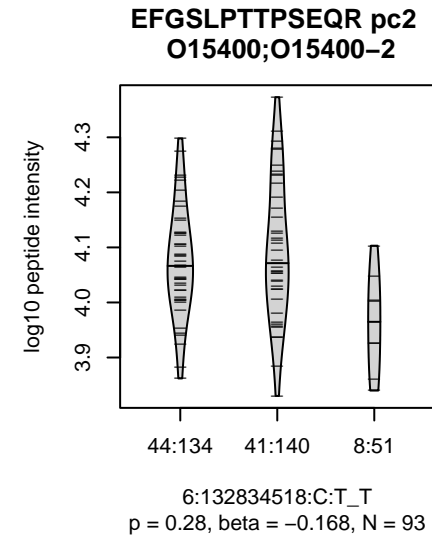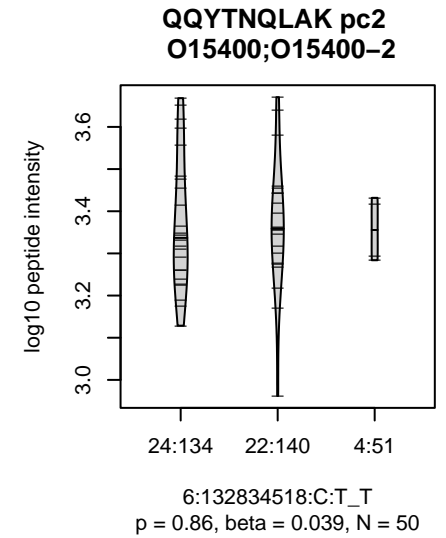

Assay Target: STX7  
 Olink UniProt: O15400  
 deCODE rsID: rs3813356  
 Proxy rsID: rs3813356  
 deCODE: 6:132513379:T:C  
 Proxy SNP: 6:132834518:C:T  
 deCODE log10(p): 45.1  
 deCODE BETA: -0.12  
 \*.\*.\*.\*.\*\_\*.\*.\*  
 1198:1141:740:692:667:431:427

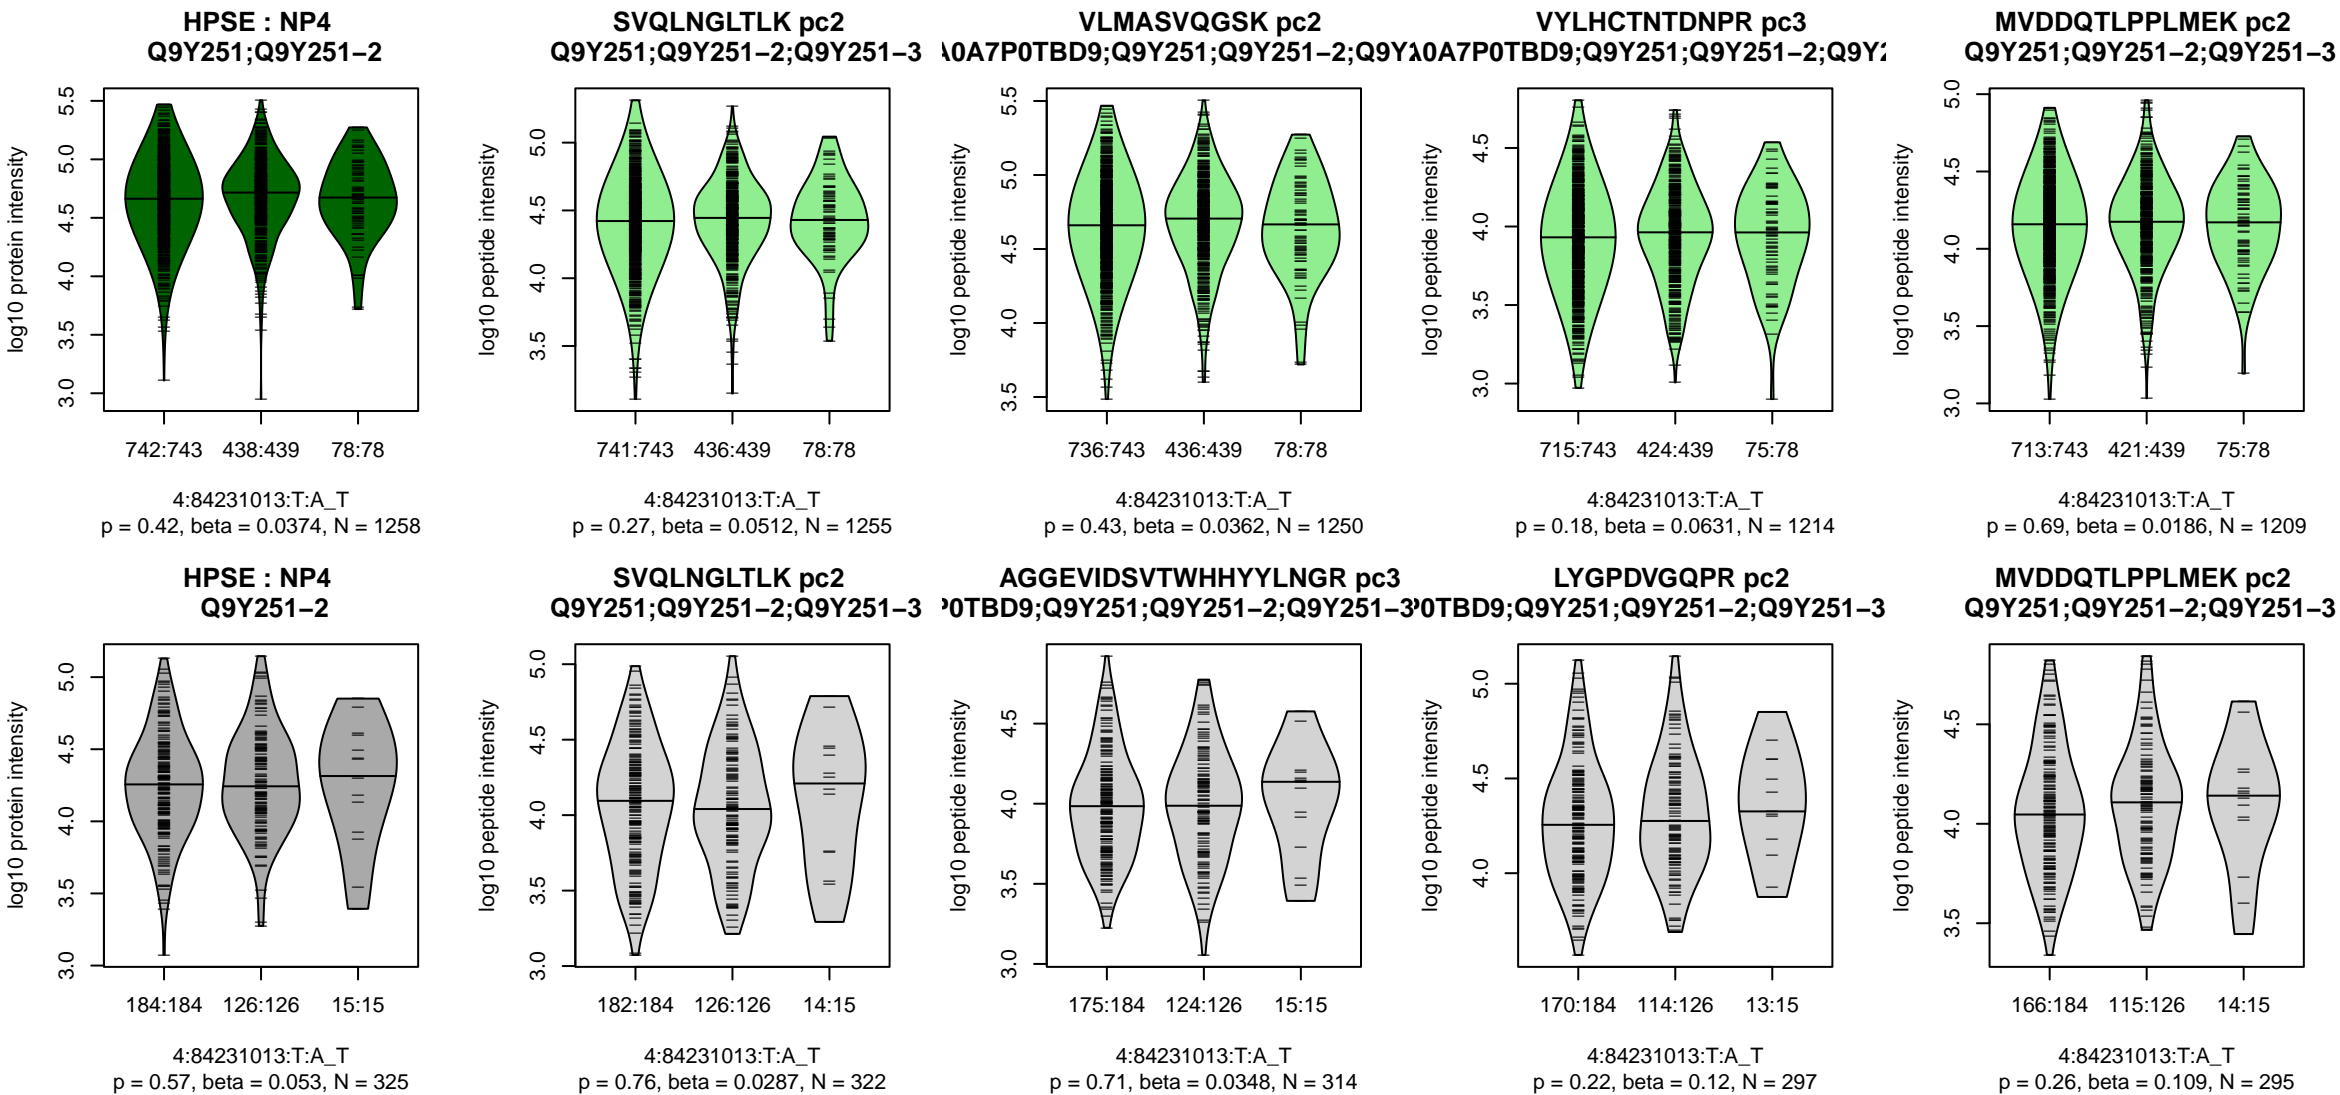

Assay Target: HPSE  
 Olink UniProt: Q9Y251  
 deCODE rsID: rs11732892  
 Proxy rsID: rs11732892  
 deCODE: 4:83309860:!:AAAAT  
 Proxy SNP: 4:84231013:T:A  
 deCODE log10(p): 43  
 deCODE BETA: -0.13  
 -----  
 1255:1250:1214:1209:1187:118



**FAIM3 : NP2  
O60667-3**

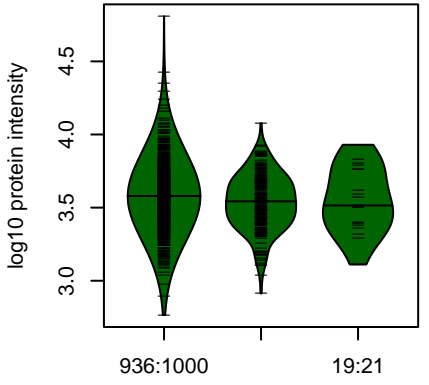

1:207087053:A:G\_G  
p = 0.021, beta = -0.149, N = 1171

**VEGELGGSVTIK pc2  
E9PQG1;O60667;O60667-3**

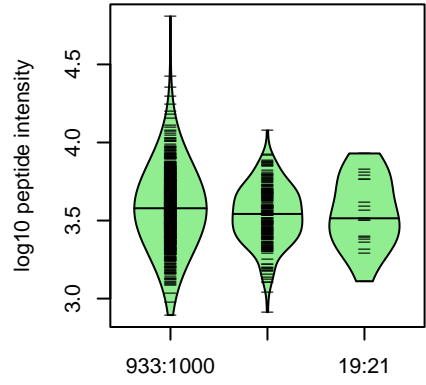

1:207087053:A:G\_G  
p = 0.016, beta = -0.155, N = 1167

**WFHLPYLFQMPAYASSSKFVTR pc:  
O60667;O60667-2;O60667-3**

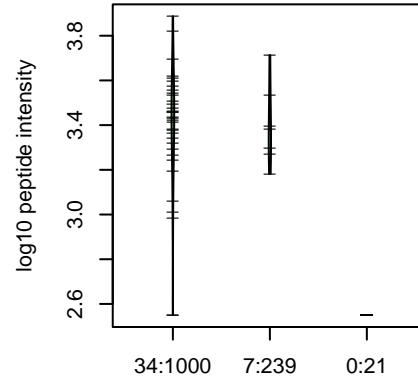

1:207087053:A:G\_G  
p = 0.6, beta = -0.207, N = 41

**EMAGSGTCGTVVSTTNFIK pc2  
E9PQG1;O60667;O60667-3**

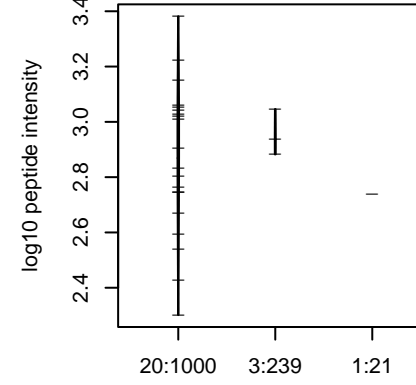

1:207087053:A:G\_G  
p = 0.46, beta = -0.28, N = 24

Assay Target: FAIM3  
Olink UniProt: O60667  
deCODE rsID: rs72758947  
Proxy rsID: rs72758947  
deCODE: 1:206913708:G:A  
Proxy SNP: 1:207087053:A:G  
deCODE log10(p): 42.2  
deCODE BETA: -0.16  
-:-:-  
1167:41:24

**CFHR3 : NP5  
Q02985**

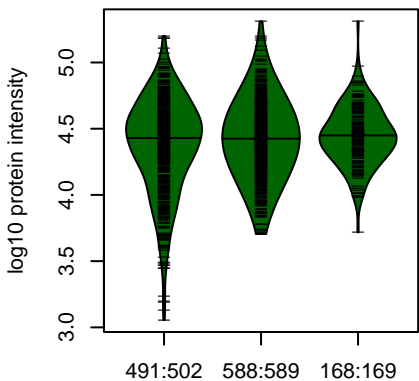

1:196664651:C:T\_C  
p = 0.016, beta = 0.1, N = 1247

**TGDTIEFMCK pc2  
2985;Q02985-2;Q92496;Q92496-2;Q9**

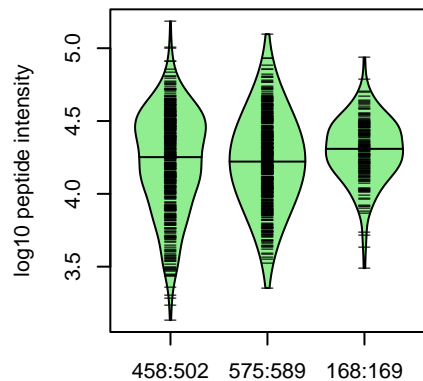

1:196664651:C:T\_C  
p = 0.024, beta = 0.0955, N = 1201

**AQTTVTCTEK pc2  
Q02985;Q02985-2;Q6NSD3**

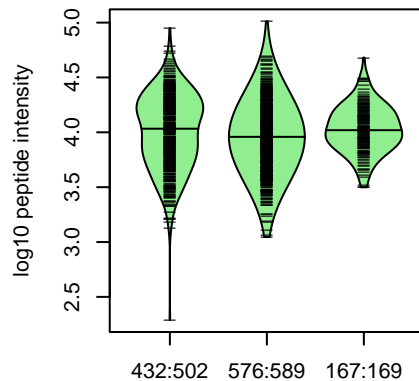

1:196664651:C:T\_C  
p = 0.81, beta = -0.01, N = 1175

**CIHPCIITEENMNK pc3  
2985;Q02985-2;Q92496;Q92496-2;Q92985;Q02985-2;Q92496;Q92496-2;Q9**

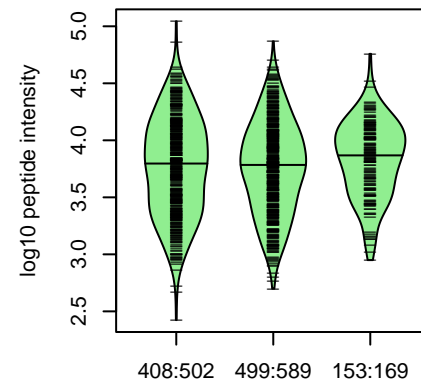

1:196664651:C:T\_C  
p = 0.15, beta = 0.0641, N = 1060

**VYVPQSR pc2**

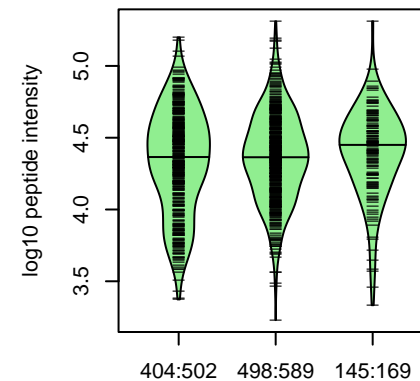

1:196664651:C:T\_C  
p = 0.066, beta = 0.083, N = 1047

**CFHR3 : NP5  
Q02985**

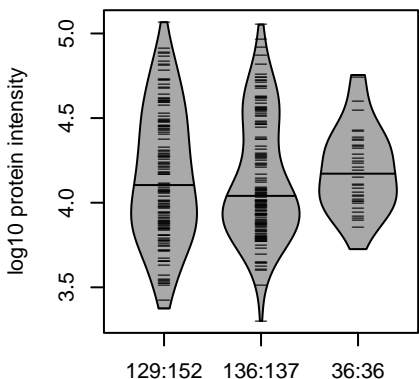

1:196664651:C:T\_C  
p = 0.41, beta = 0.07, N = 301

**TGDTIEFMCK pc2  
2985;Q02985-2;Q92496;Q92496-2;Q92985;Q02985-2;Q92496;Q92496-2;Q9**

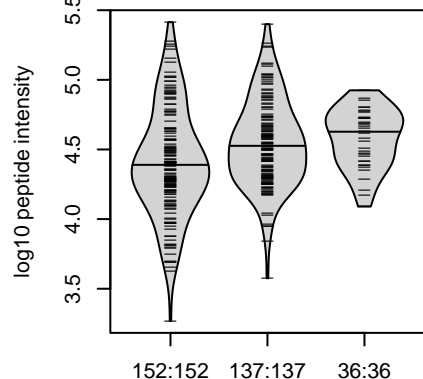

1:196664651:C:T\_C  
p = 0.00018, beta = 0.303, N = 325

**CIHPCIITEENMNK pc3  
Q02985;Q02985-2;Q6NSD3**

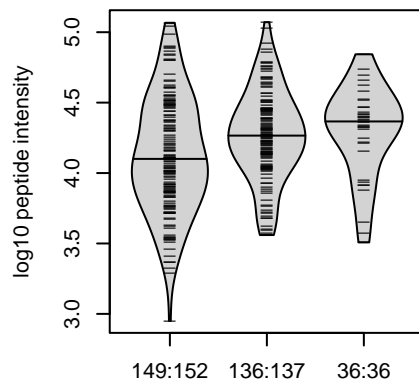

1:196664651:C:T\_C  
p = 0.00098, beta = 0.268, N = 321

**AQTTVTCTEK pc2  
Q02985;Q02985-2;Q6NSD3**

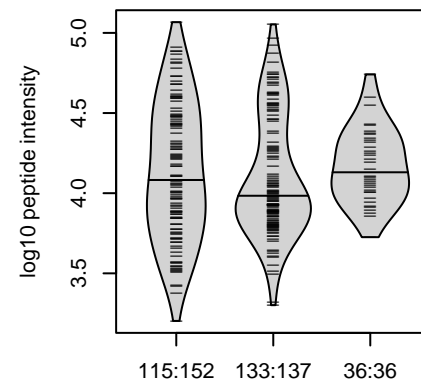

1:196664651:C:T\_C  
p = 0.43, beta = 0.0678, N = 284

**EGIVEYPRCE pc2  
2985;Q02985-2;Q92496;Q92496-2;Q9**

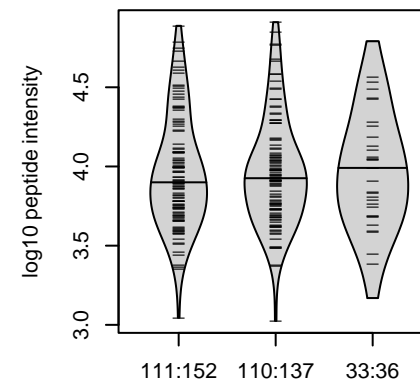

1:196664651:C:T\_C  
p = 0.55, beta = 0.0536, N = 254

**CYFPYLENGYNQNYGR pc3  
rs1061170 ALT**

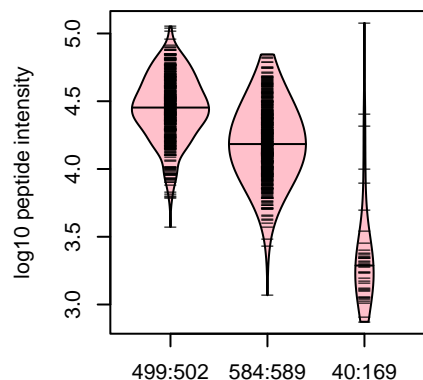

1:196664651:C:T\_C  
p = 9.8e-129, model = DOM, N = 1123

**CYFPYLENGYNQNYGRK pc3  
rs1061170 ALT**

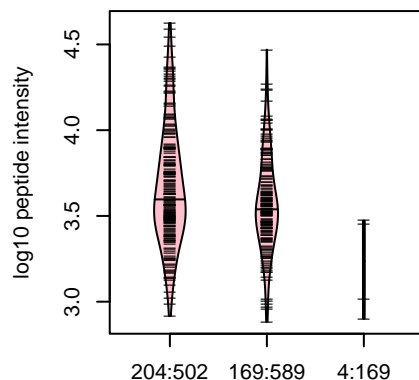

1:196664651:C:T\_C  
p = 1.4e-22, model = DOM, N = 377

Assay Target: CFHR3  
Olink UniProt: Q02985  
deCODE rsID: rs10922098  
Proxy rsID: rs10922098  
deCODE: 1:196695521:C:T  
Proxy SNP: 1:196664651:C:T  
deCODE log10(p): 40.9  
deCODE BETA: 0.11  
- - - - -NA:NA  
1201:1175:1060:1047:690:607:4

**F2 : NP4  
P00734**

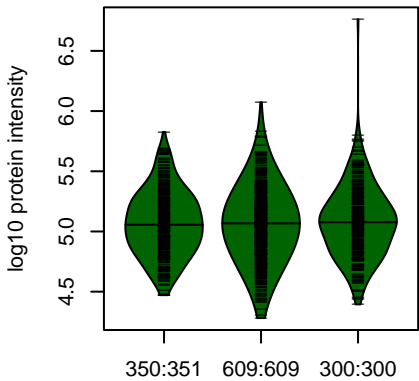

11:46760756:G:A\_A  
p = 0.36, beta = 0.0358, N = 1259

**GQPSVLQVVNLPIVERPVCK pc3  
E9PIT3;P00734**

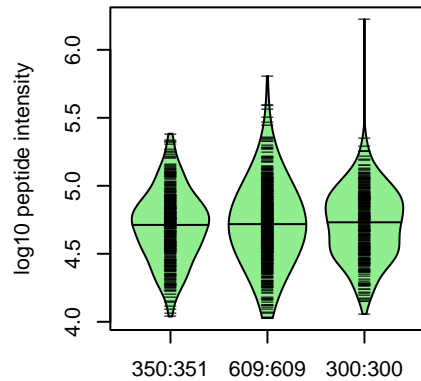

11:46760756:G:A\_A  
p = 0.23, beta = 0.0474, N = 1259

**HQDFNSAVQLVENFCR pc3  
E9PIT3;P00734**

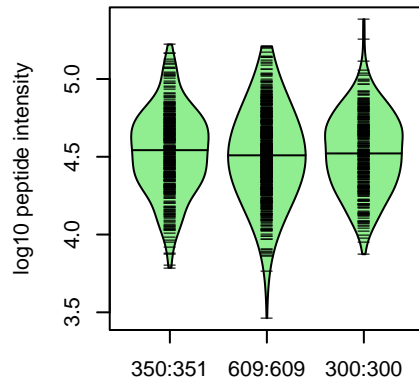

11:46760756:G:A\_A  
p = 0.69, beta = 0.0155, N = 1259

**TATSEYQTFNPR pc2  
E9PIT3;P00734**

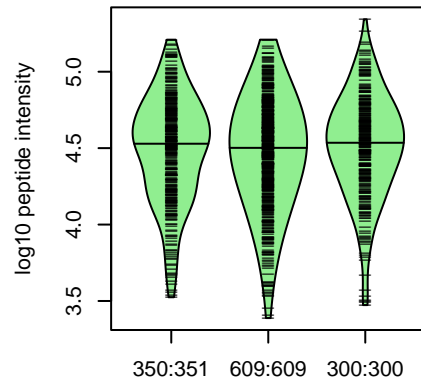

11:46760756:G:A\_A  
p = 0.28, beta = 0.0421, N = 1259

**ELLESYIDGR pc2  
E9PIT3;P00734**

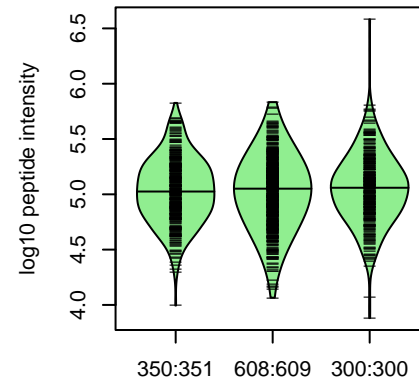

11:46760756:G:A\_A  
p = 0.32, beta = 0.0387, N = 1258

**F2 : NP4  
P00734**

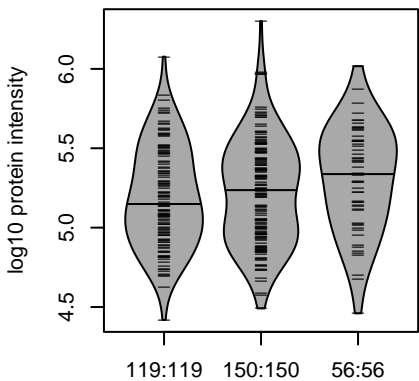

11:46760756:G:A\_A  
p = 0.11, beta = 0.124, N = 325

**ELLESYIDGR pc2  
E9PIT3;P00734**

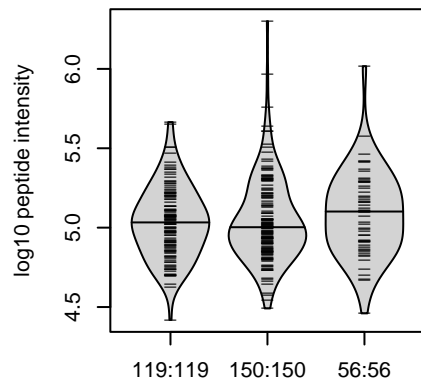

11:46760756:G:A\_A  
p = 0.61, beta = 0.0394, N = 325

**GQPSVLQVVNLPIVERPVCK pc3  
E9PIT3;P00734**

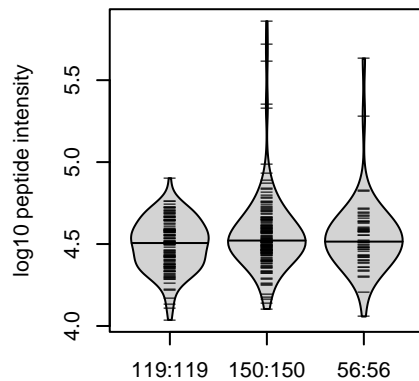

11:46760756:G:A\_A  
p = 0.22, beta = 0.095, N = 325

**HQDFNSAVQLVENFCR pc3  
E9PIT3;P00734**

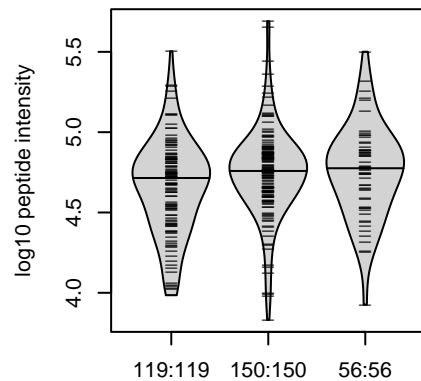

11:46760756:G:A\_A  
p = 0.03, beta = 0.168, N = 325

**ITDNMFCAGYKPDGK pc3  
E9PIT3;P00734**

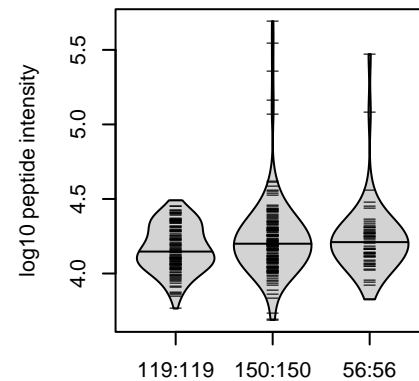

11:46760756:G:A\_A  
p = 0.11, beta = 0.123, N = 325

**NPDSSTMGWCYTDDPTVR pc3  
rs5896 ALT**

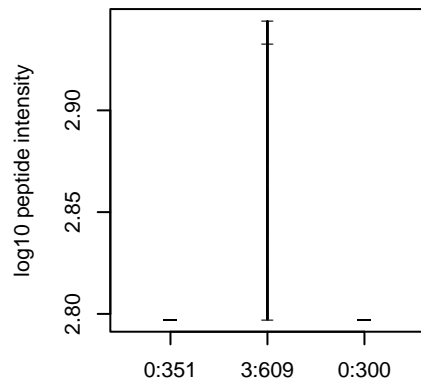

11:46760756:G:A\_A  
p = NA, model = NA, N = 3

**NPDSSTMGWCYTDDPTVR pc3  
rs5896 REF**

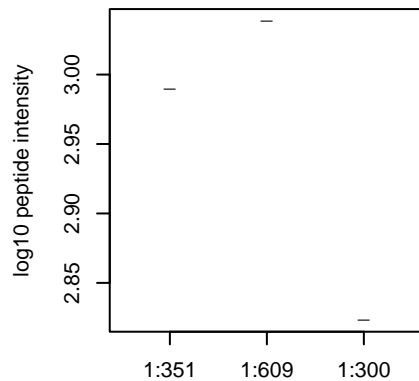

11:46760756:G:A\_A  
p = NA, model = NA, N = 3

Assay Target: F2  
 Olink UniProt: P00734  
 deCODE rsID: rs3136516  
 Proxy rsID: rs3136516  
 deCODE: 11:46739206:G:A  
 Proxy SNP: 11:46760756:G:A  
 deCODE log10(p): 40.3  
 deCODE BETA: 0.11  
 -----  
 1259:1259:1259:1258:1258:125

**ANXA1 : NP3  
P04083**

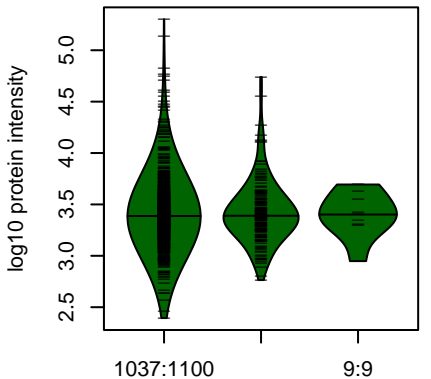

9:75789935:G:A\_G  
p = 0.69, beta = -0.0317, N = 1192

**GVDEATIIDLTK pc2  
P04083**

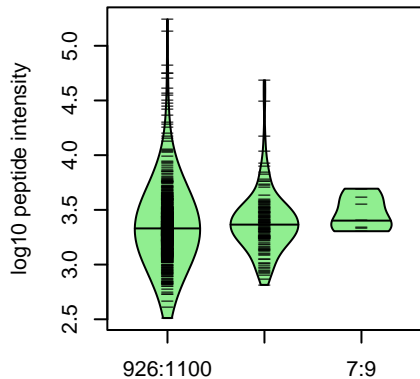

9:75789935:G:A\_G  
p = 0.2, beta = 0.108, N = 1065

**ALTGHLEEVLLALK pc3  
P04083**

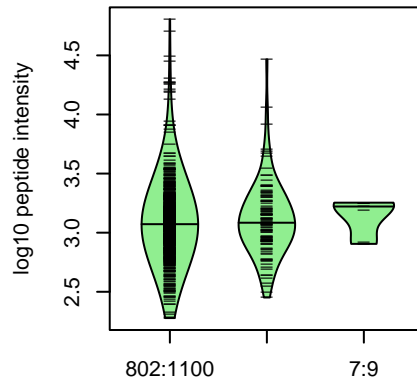

9:75789935:G:A\_G  
p = 0.4, beta = 0.0752, N = 919

**GTDVNVFNTILTR pc2  
P04083**

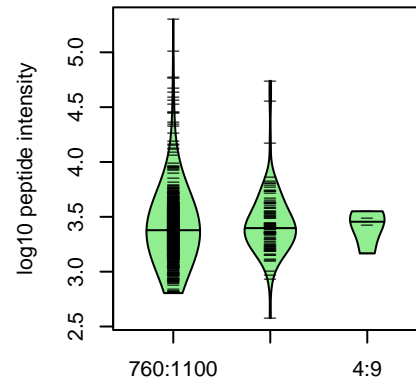

9:75789935:G:A\_G  
p = 0.46, beta = 0.0729, N = 864

**GLGTDEDTLIEILASR pc2  
P04083**

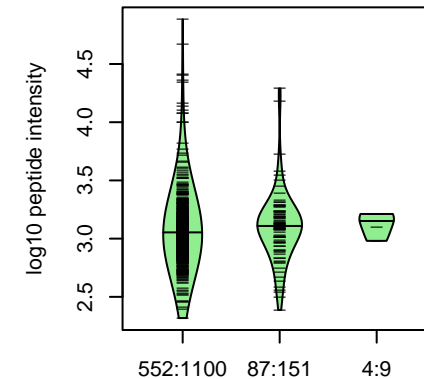

9:75789935:G:A\_G  
p = 0.58, beta = 0.0576, N = 643

**ANXA1 : NP3  
P04083**

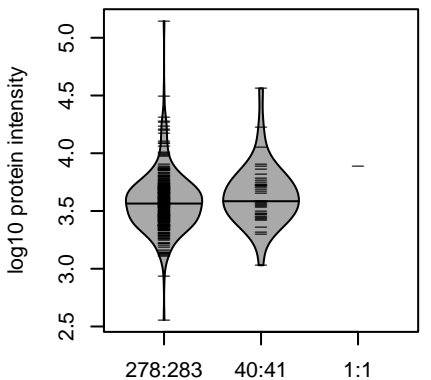

9:75789935:G:A\_G  
p = 0.031, beta = 0.343, N = 319

**GTDVNVFNTILTR pc2  
P04083**

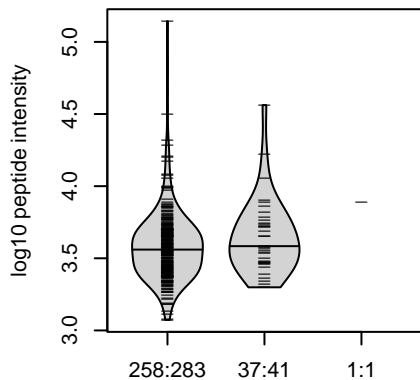

9:75789935:G:A\_G  
p = 0.025, beta = 0.367, N = 296

**GVDEATIIDLTK pc2  
P04083**

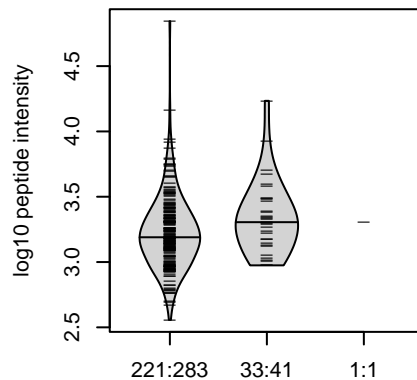

9:75789935:G:A\_G  
p = 0.012, beta = 0.433, N = 255

**ALTGHLEEVLLALK pc3  
P04083**

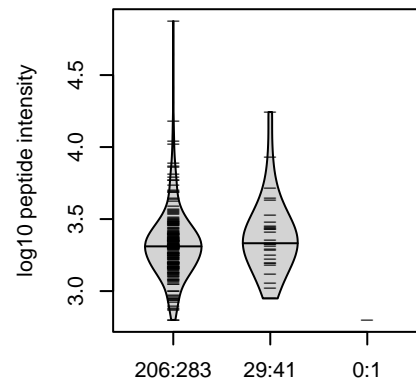

9:75789935:G:A\_G  
p = 0.31, beta = 0.198, N = 235

**NALLSLAK pc2  
P04083**

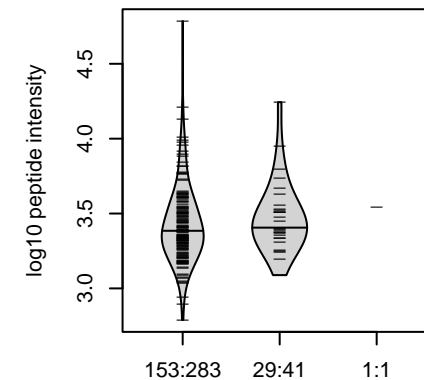

9:75789935:G:A\_G  
p = 0.16, beta = 0.262, N = 183

Assay Target: ANXA1  
Olink UniProt: P04083  
deCODE rsID: rs7357731  
Proxy rsID: rs7357731  
deCODE: 9:73175019:G:A  
Proxy SNP: 9:75789935:G:A  
deCODE log10(p): 39.6  
deCODE BETA: 0.34  
-----  
1065:919:864:643:345:333:269:

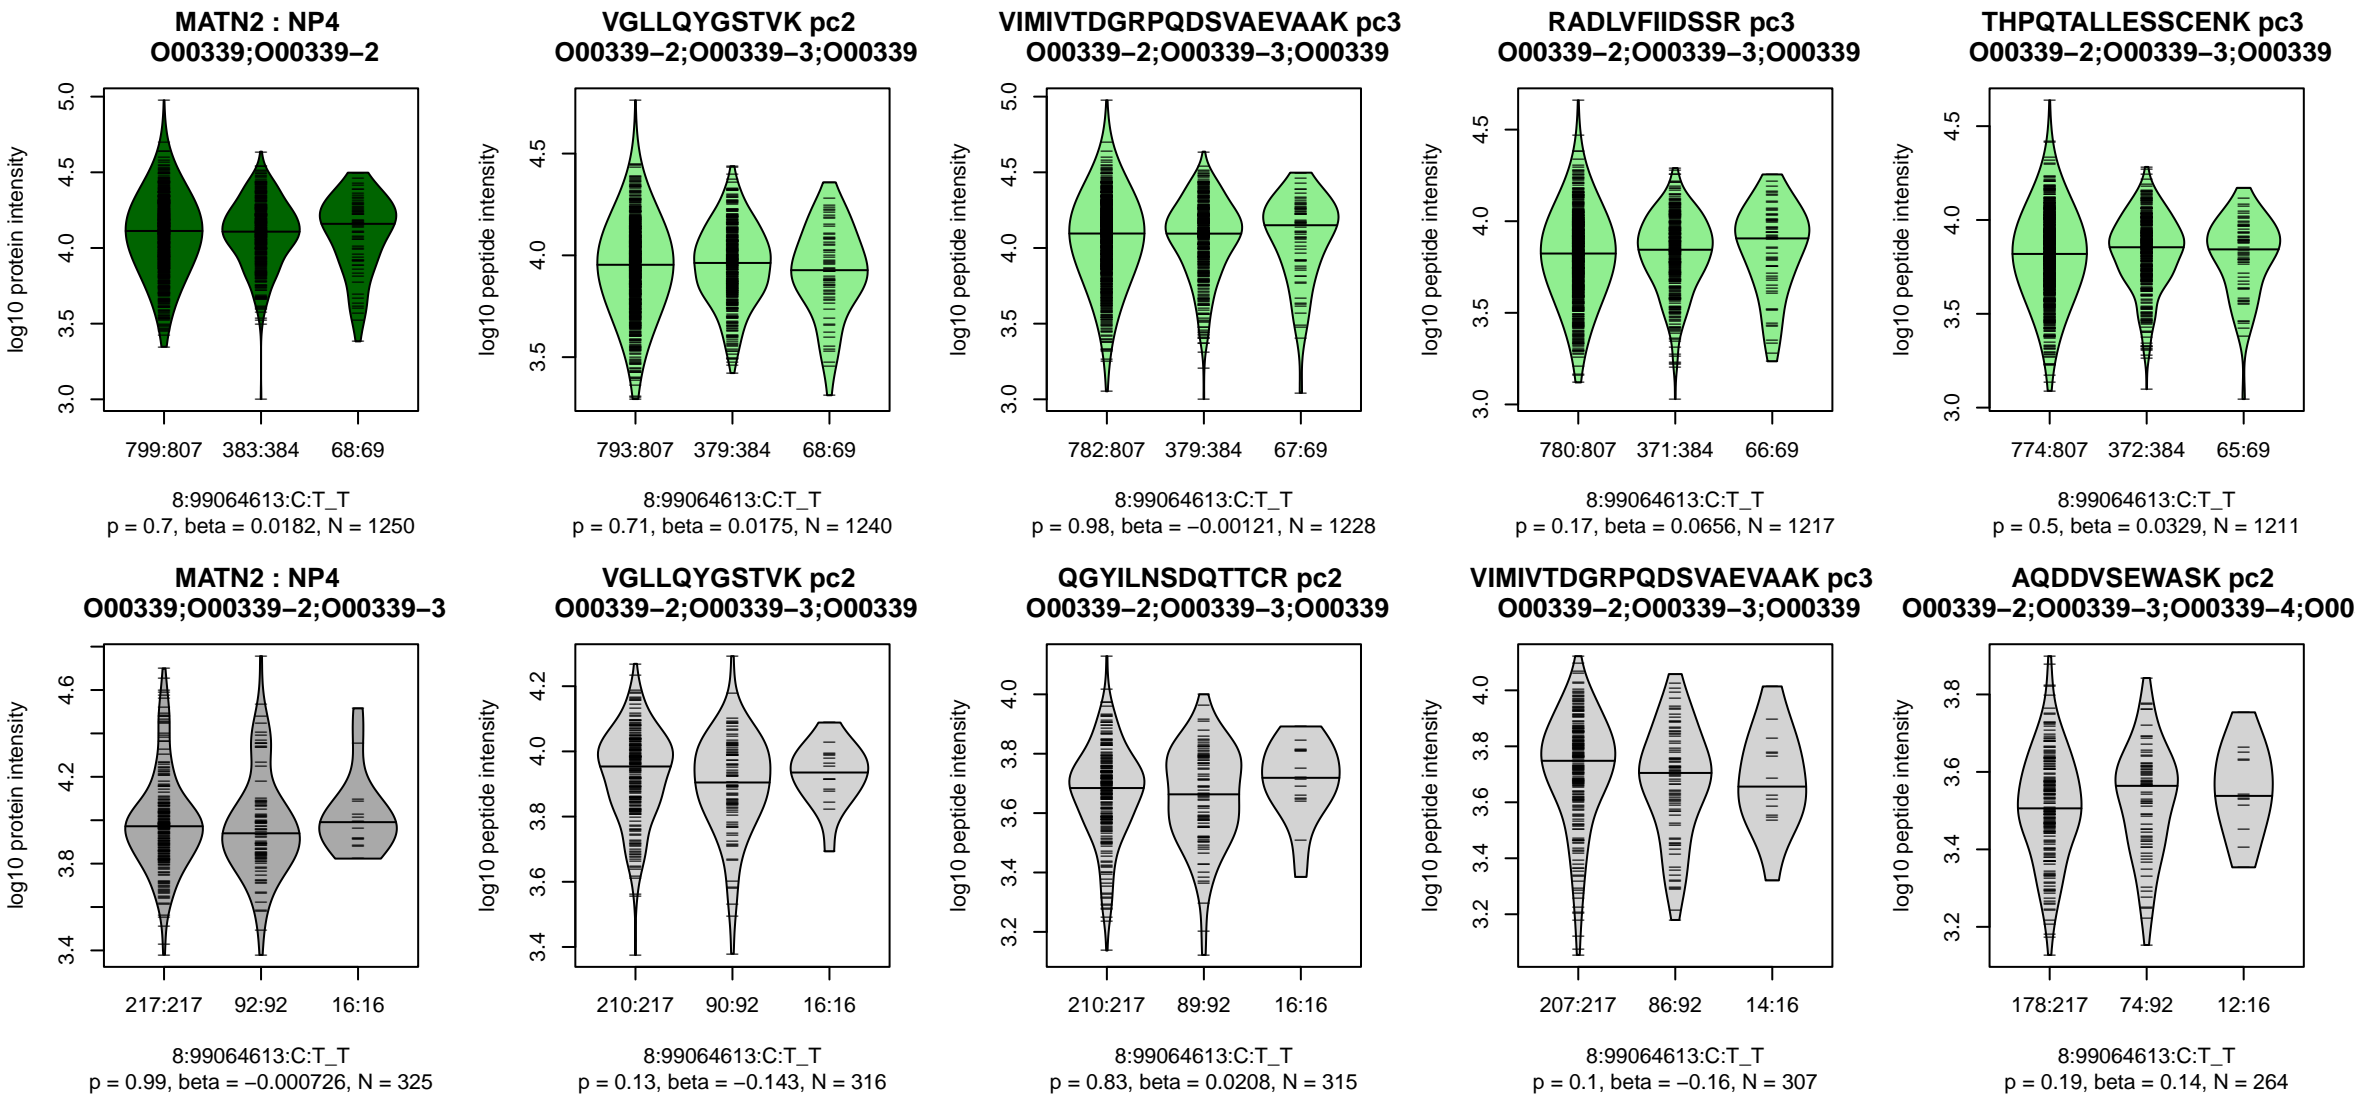

Assay Target: MATN2  
 Olink UniProt: O00339  
 deCODE rsID: rs78548919  
 Proxy rsID: rs28522929  
 deCODE: 8:98052647:T:C  
 Proxy SNP: 8:99064613:C:T  
 deCODE log<sub>10</sub>(p): 39.4  
 deCODE BETA: 0.14  
 -----  
 1240:1228:1217:1211:1205:114













**HYAL1 : NP5**  
**Q12794**

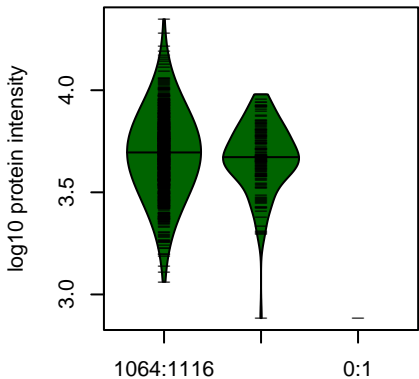

3:50339622:C:T\_T  
p = 0.25, beta = -0.104, N = 1204

**AWMAGTLQLGR pc2**  
**Q12794;Q12794-2**

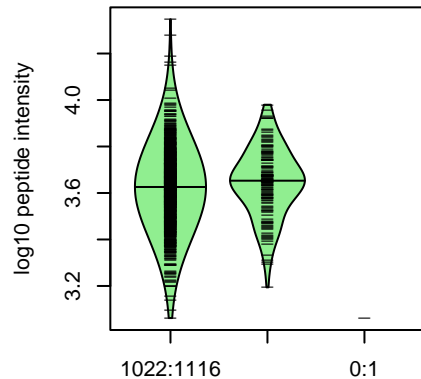

3:50339622:C:T\_T  
p = 0.17, beta = 0.125, N = 1160

**AQNDELGWLWGQSR pc2**  
**Q12794-3;Q12794;Q12794-2**

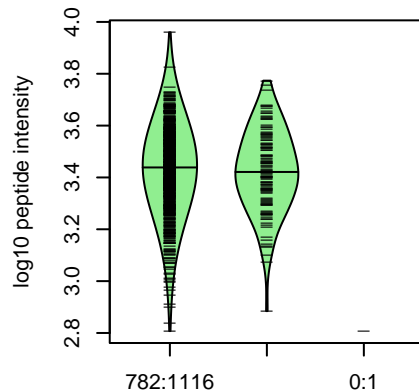

3:50339622:C:T\_T  
p = 0.84, beta = -0.0196, N = 898

**ALYPSIYMPAVLEGTK pc2**  
**Q12794-3;Q12794;Q12794-2**

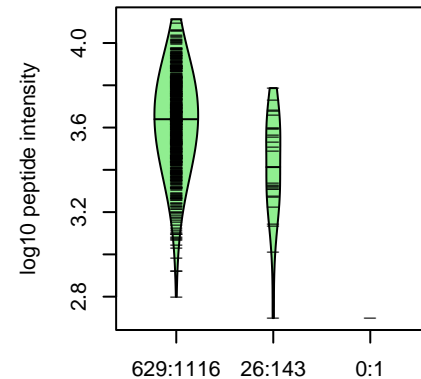

3:50339622:C:T\_T  
p = 1e-05, beta = -0.871, N = 655

**HGVDVDVSFVDVAVANPGQTFR pc3**  
**Q12794;Q12794-2**

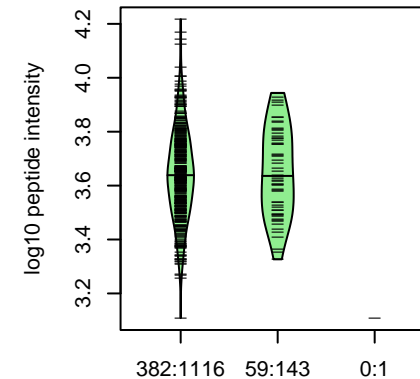

3:50339622:C:T\_T  
p = 0.62, beta = 0.0681, N = 441

**HYAL1 : NP5**  
**Q12794;Q12794-2**

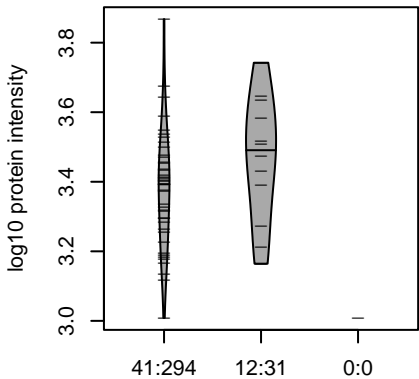

3:50339622:C:T\_T  
p = 0.13, beta = 0.466, N = 53

**AQNDELGWLWGQSR pc2**  
**Q12794-3;Q12794;Q12794-2**

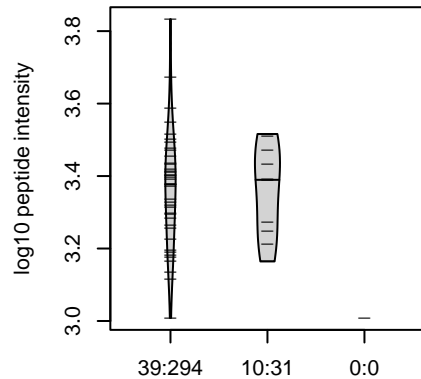

3:50339622:C:T\_T  
p = 0.79, beta = 0.0894, N = 49

Assay Target: HYAL1  
Olink UniProt: Q12794  
deCODE rsID: rs116482870  
Proxy rsID: rs116482870  
deCODE: 3:50302191:T:C  
Proxy SNP: 3:50339622:C:T  
deCODE log10(p): 35.8  
deCODE BETA: -0.24  
-:-\*:-:-  
1160:898:655:441:146



**F2 : NP4  
P00734**

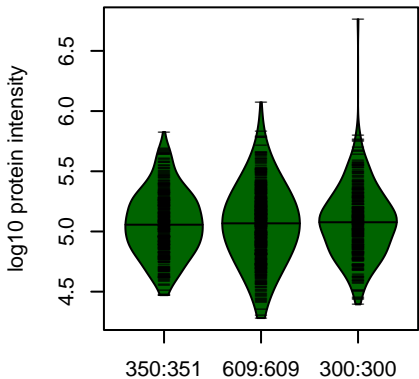

11:46760756:G:A\_A  
p = 0.36, beta = 0.0358, N = 1259

**QQPSVLQVVNLPIVERPVCK pc3  
E9PIT3;P00734**

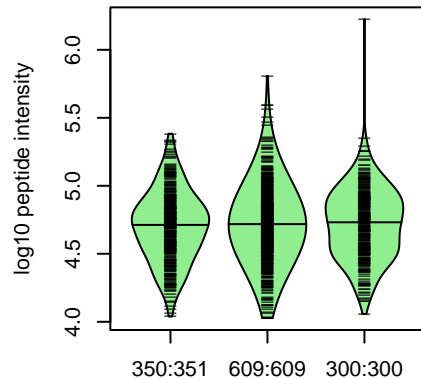

11:46760756:G:A\_A  
p = 0.23, beta = 0.0474, N = 1259

**HQDFNSAVQLVENFCR pc3  
E9PIT3;P00734**

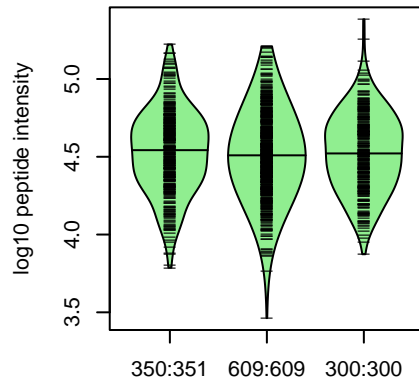

11:46760756:G:A\_A  
p = 0.69, beta = 0.0155, N = 1259

**TATSEYQTFNPR pc2  
E9PIT3;P00734**

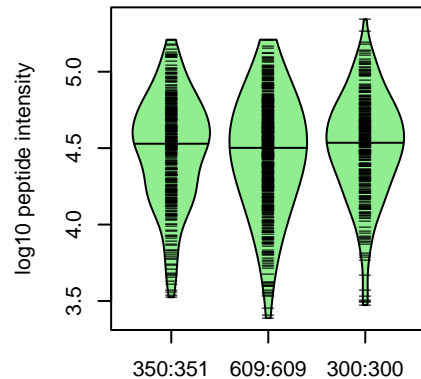

11:46760756:G:A\_A  
p = 0.28, beta = 0.0421, N = 1259

**ELLESYIDGR pc2  
E9PIT3;P00734**

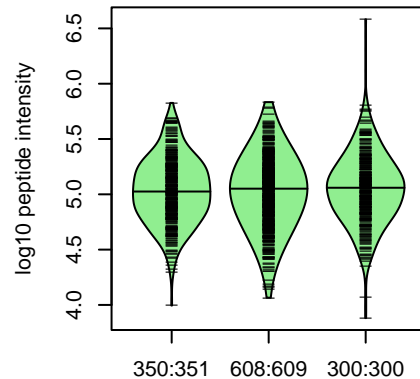

11:46760756:G:A\_A  
p = 0.32, beta = 0.0387, N = 1258

**F2 : NP4  
P00734**

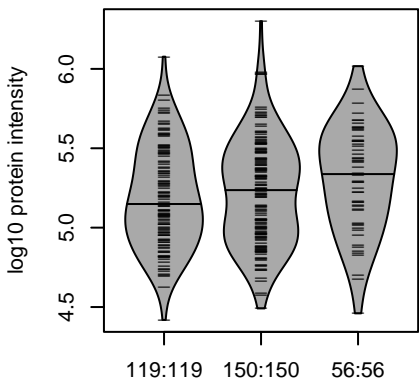

11:46760756:G:A\_A  
p = 0.11, beta = 0.124, N = 325

**ELLESYIDGR pc2  
E9PIT3;P00734**

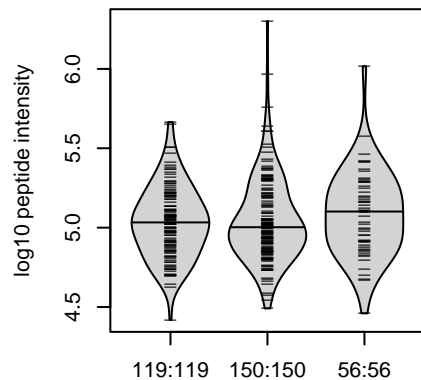

11:46760756:G:A\_A  
p = 0.61, beta = 0.0394, N = 325

**QQPSVLQVVNLPIVERPVCK pc3  
E9PIT3;P00734**

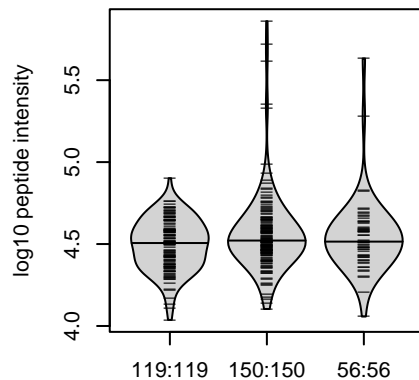

11:46760756:G:A\_A  
p = 0.22, beta = 0.095, N = 325

**HQDFNSAVQLVENFCR pc3  
E9PIT3;P00734**

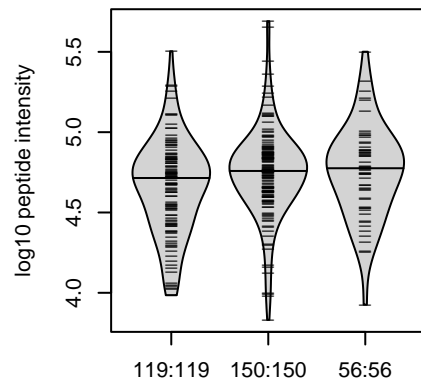

11:46760756:G:A\_A  
p = 0.03, beta = 0.168, N = 325

**ITDNMFCAGYKPDGK pc3  
E9PIT3;P00734**

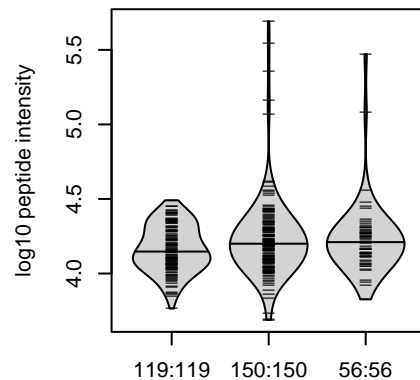

11:46760756:G:A\_A  
p = 0.11, beta = 0.123, N = 325

**NPDSSTMGWCYTDDPTVR pc3  
rs5896 ALT**

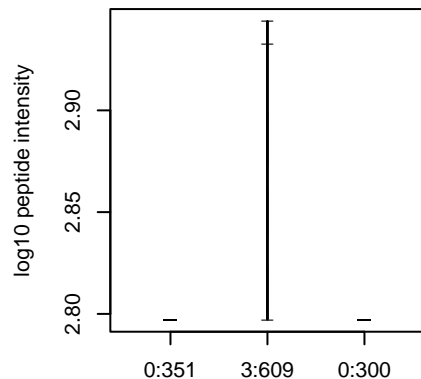

11:46760756:G:A\_A  
p = NA, model = NA, N = 3

**NPDSSTMGWCYTDDPTVR pc3  
rs5896 REF**

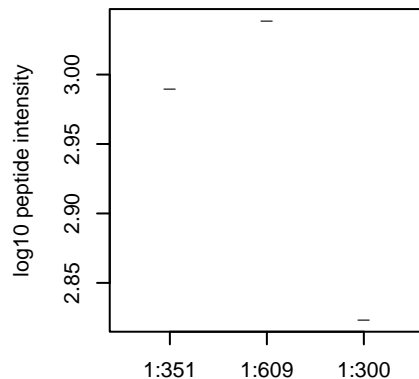

11:46760756:G:A\_A  
p = NA, model = NA, N = 3

Assay Target: F2  
Olink UniProt: P00734  
deCODE rsID: rs3136516  
Proxy rsID: rs3136516  
deCODE: 11:46739206:G:A  
Proxy SNP: 11:46760756:G:A  
deCODE log10(p): 33.9  
deCODE BETA: 0.1  
-----  
1259:1259:1259:1258:1258:125



**ANGPT1 : NP4**  
**Q15389;Q15389-2**

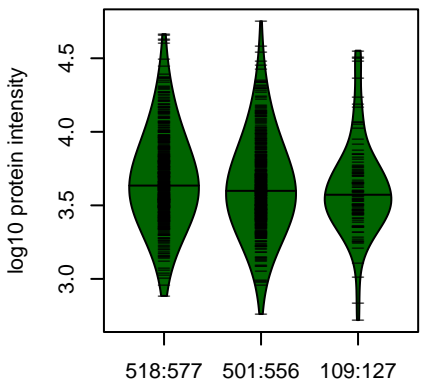

8:106581528:A:T\_T  
 $p = 0.0092$ ,  $\beta = -0.118$ ,  $N = 1128$

**IELMDWEGNR pc2**  
**B4DTQ9;E7ERK4;Q15389;Q15389-**

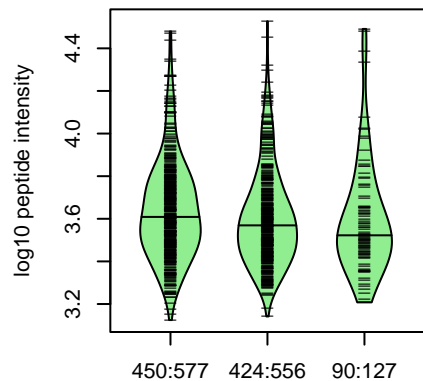

8:106581528:A:T\_T  
 $p = 0.014$ ,  $\beta = -0.122$ ,  $N = 964$

**QTYIIQLELEK pc2**  
**B4DTQ9;E7ERK4;Q15389;Q15389-**

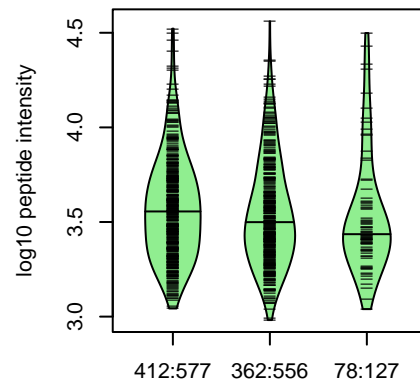

8:106581528:A:T\_T  
 $p = 0.12$ ,  $\beta = -0.0809$ ,  $N = 852$

**LEIQLLENSLSTYK pc2**  
**Q15389;Q15389-2**

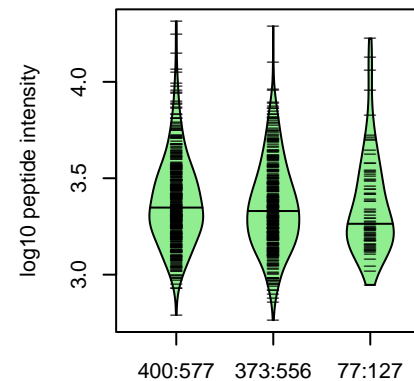

8:106581528:A:T\_T  
 $p = 0.1$ ,  $\beta = -0.0861$ ,  $N = 850$

**QSSLILHGADFSTK pc3**  
**B4DTQ9;E7ERK4;Q15389;Q15389-**

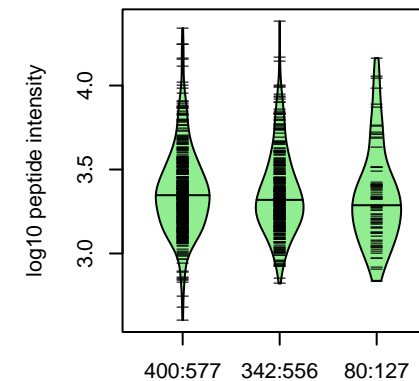

8:106581528:A:T\_T  
 $p = 0.17$ ,  $\beta = -0.0715$ ,  $N = 822$

**ANGPT1 : NP4**  
**Q15389;Q15389-2**

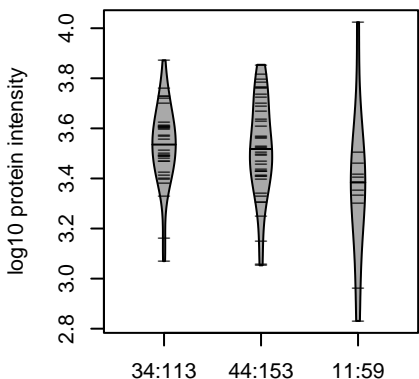

8:106581528:A:T\_T  
 $p = 0.064$ ,  $\beta = -0.285$ ,  $N = 89$

**QTYIIQLELEK pc2**  
**B4DTQ9;E7ERK4;Q15389;Q15389-**

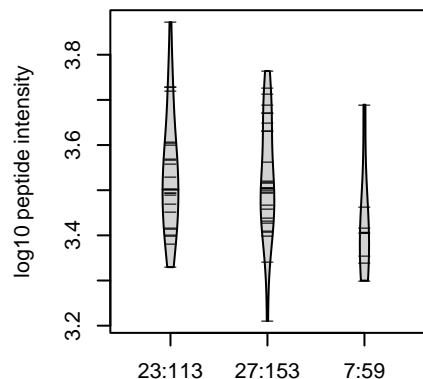

8:106581528:A:T\_T  
 $p = 0.037$ ,  $\beta = -0.389$ ,  $N = 57$

**IELMDWEGNR pc2**  
**B4DTQ9;E7ERK4;Q15389;Q15389-**

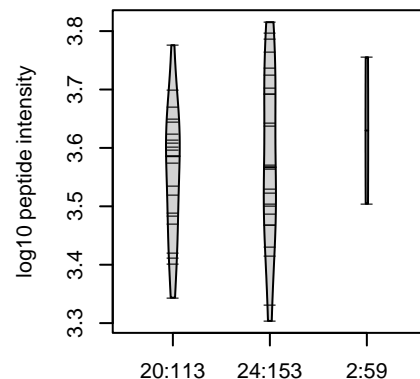

8:106581528:A:T\_T  
 $p = 0.66$ ,  $\beta = 0.108$ ,  $N = 46$

**SGIYTIYINNMPEPK pc2**  
**B4DTQ9;E7ERK4;Q15389;Q15389-**

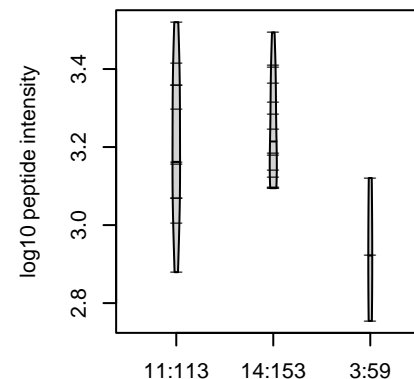

8:106581528:A:T\_T  
 $p = 0.39$ ,  $\beta = -0.233$ ,  $N = 28$

**QLLQQTNEILK pc2**  
**Q15389;Q15389-2**

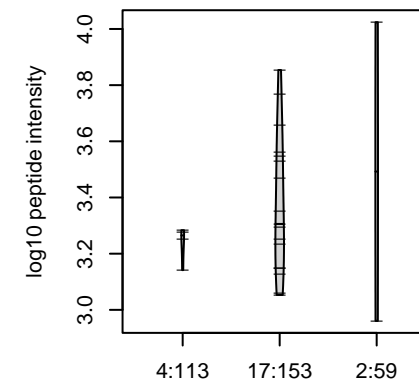

8:106581528:A:T\_T  
 $p = 0.77$ ,  $\beta = -0.112$ ,  $N = 23$

Assay Target: ANGPT1  
Olink UniProt: Q15389  
deCODE rsID: rs6993770  
Proxy rsID: rs6993770  
deCODE: 8:105569300:T:A  
Proxy SNP: 8:106581528:A:T  
deCODE log10(p): 31.9  
deCODE BETA: -0.12  
-----  
964:852:850:822:732:624:507:4

**PRKCSH : NP5**  
**P14314-2**

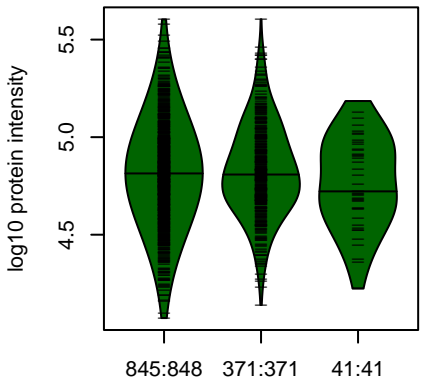

19:11558275:G:A\_A  
p = 0.79, beta = 0.0139, N = 1257

**PLYIPSNR pc2**  
**K7ELL7;P14314;P14314-2**

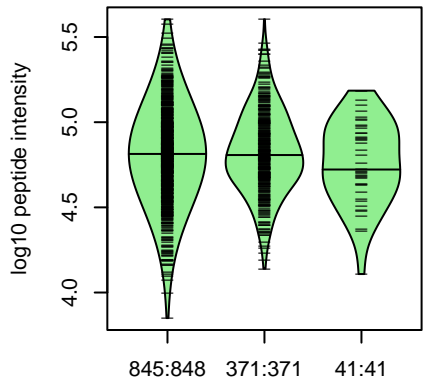

19:11558275:G:A\_A  
p = 0.79, beta = 0.0136, N = 1257

**LWEEQLAAAK pc2**  
**K7ELL7;P14314;P14314-2**

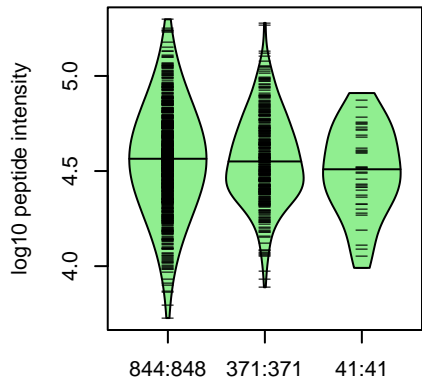

19:11558275:G:A\_A  
p = 0.7, beta = -0.0201, N = 1256

**GVSLTNHHFYDESK pc3**  
**K7ELL7;P14314;P14314-2**

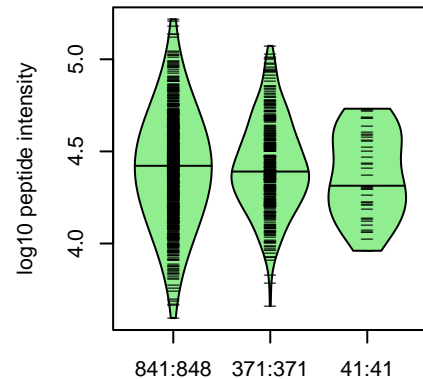

19:11558275:G:A\_A  
p = 0.63, beta = 0.025, N = 1253

**SLEDQVEMLR pc2**  
**K7ELL7;P14314;P14314-2**

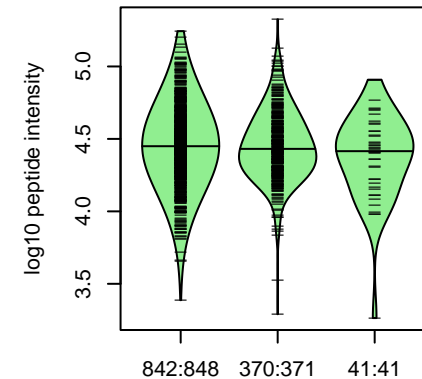

19:11558275:G:A\_A  
p = 0.34, beta = -0.0494, N = 1253

**PRKCSH : NP5**  
**P14314-2**

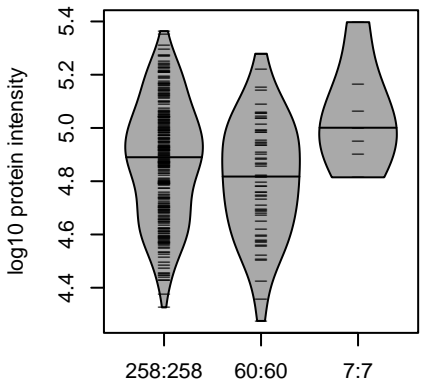

19:11558275:G:A\_A  
p = 0.54, beta = -0.0713, N = 325

**AQQEQELAADAFK pc2**  
**K7ELL7;P14314;P14314-2**

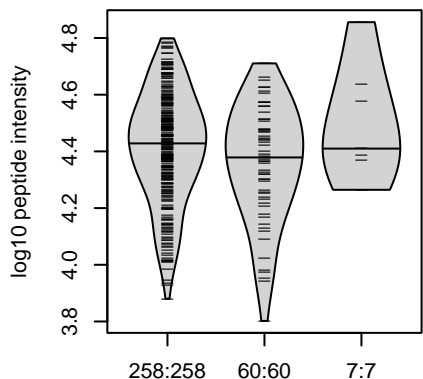

19:11558275:G:A\_A  
p = 0.48, beta = -0.0823, N = 325

**ESLQQMAEVTR pc2**  
**K7ELL7;P14314;P14314-2**

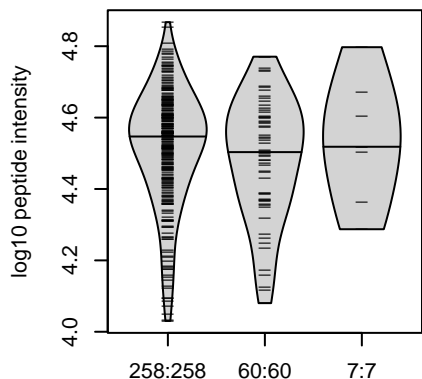

19:11558275:G:A\_A  
p = 0.53, beta = -0.073, N = 325

**GVSLTNHHFYDESK pc3**  
**K7ELL7;P14314;P14314-2**

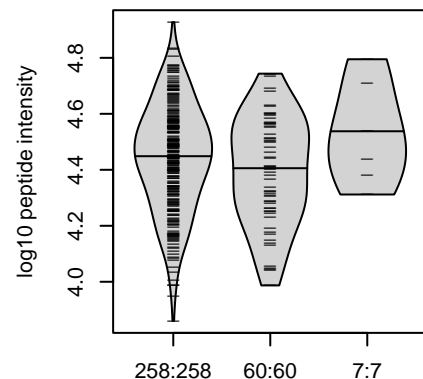

19:11558275:G:A\_A  
p = 0.45, beta = -0.0893, N = 325

**ILIEDWK pc2**  
**K7ELL7;P14314;P14314-2**

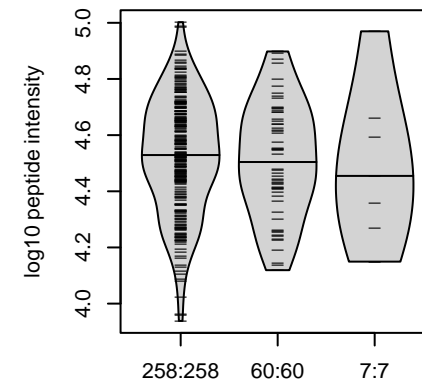

19:11558275:G:A\_A  
p = 0.66, beta = -0.0508, N = 325

**YRSEALPTDLPAPSAPDLTEPK pc3**  
**rs11557488 REF**

Assay Target: PRKCSH  
Olink UniProt: P14314  
deCODE rsID: rs11557488  
Proxy rsID: rs11557488  
deCODE: 19:11447460:A:G  
Proxy SNP: 19:11558275:G:A  
deCODE log10(p): 30.8  
deCODE BETA: 0.11  
-----  
1257:1256:1253:1253:1250:124

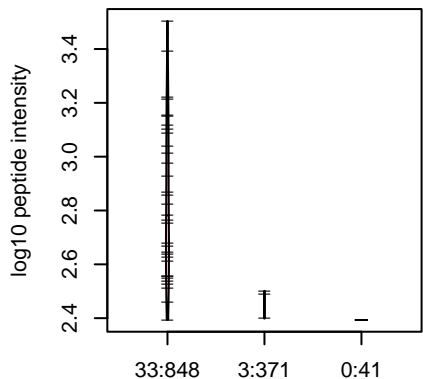

19:11558275:G:A\_A  
p = 0.00091, model = REC, N = 36

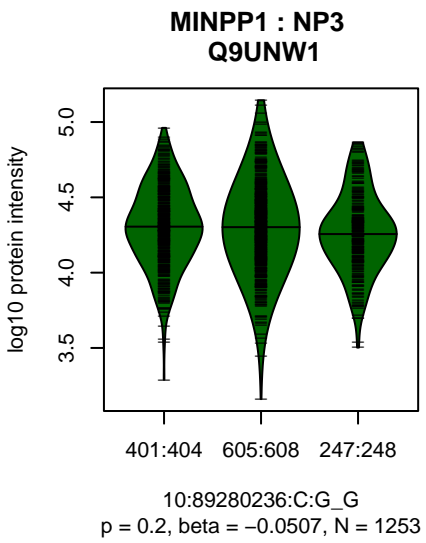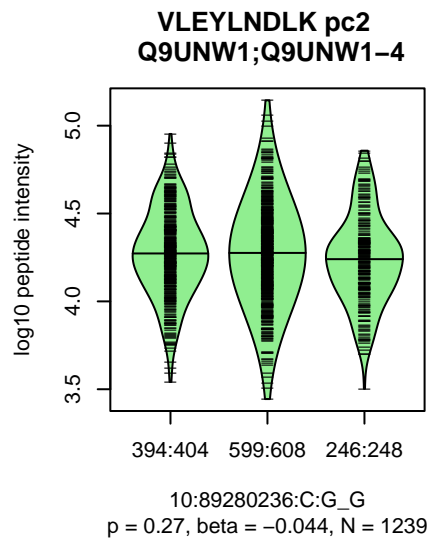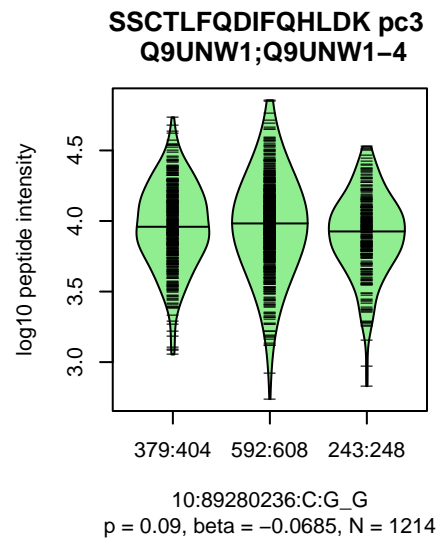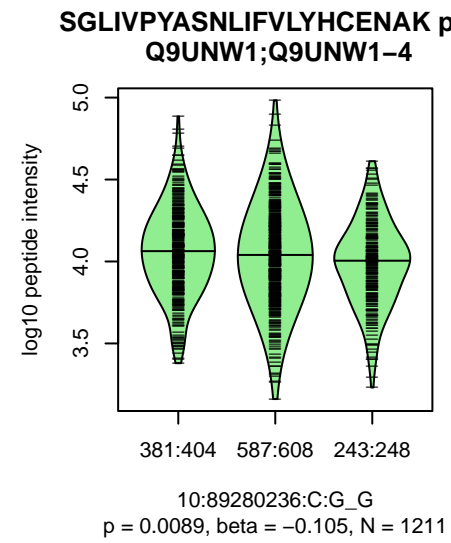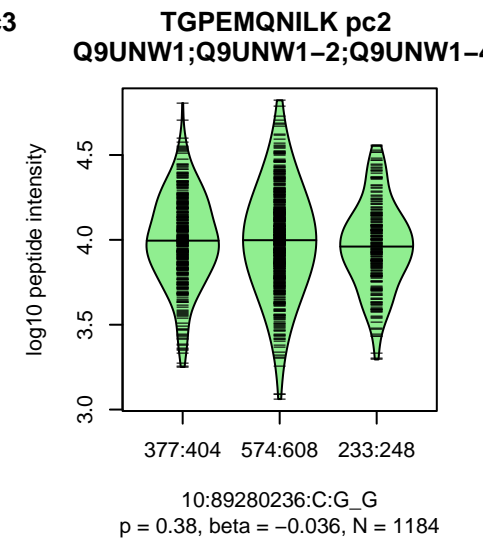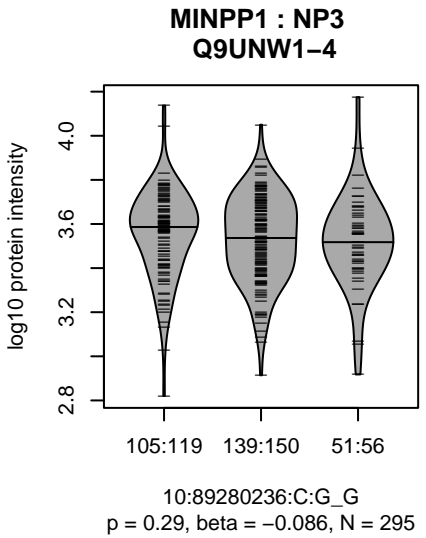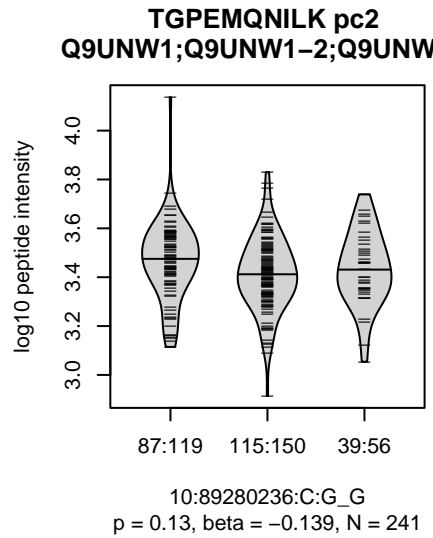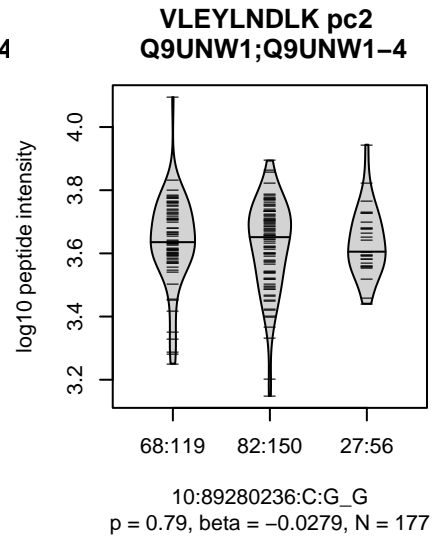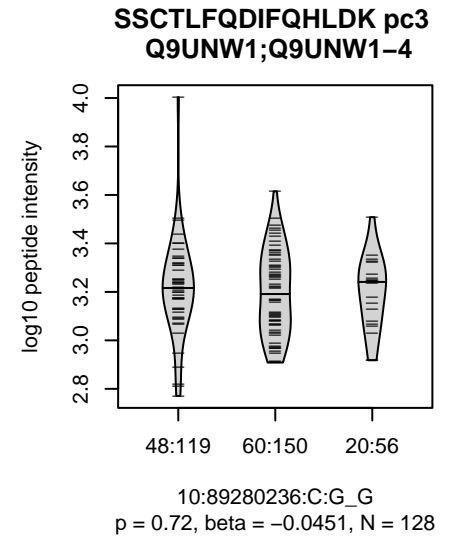

Assay Target: MINPP1  
 Olink UniProt: Q9UNW1  
 deCODE rsID: rs59980852  
 Proxy rsID: rs12356542  
 deCODE: 10:87515989:T:C  
 Proxy SNP: 10:89280236:C:G  
 deCODE log10(p): 30.2  
 deCODE BETA: -0.1  
 - - - - -  
 1239:1214:1211:1184:1174:987





**PGM1 : NP1  
P36871**

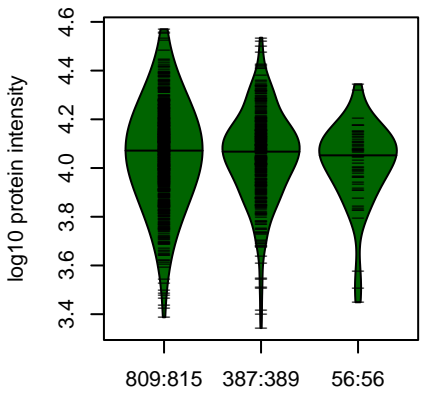

1:64113459:A:G\_G  
p = 0.22, beta = -0.0603, N = 1252

**LSGTGSAGATIR pc2**

**A0A3B3ITK7;P36871;P36871-2;P368:A0A3B3ITK7;P36871;P36871-2;P368:A0A3B3ITK7;P36871;P36871-2;P368**

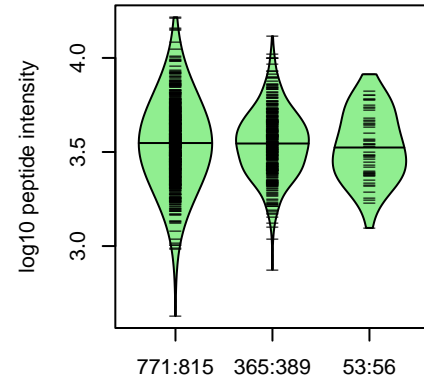

1:64113459:A:G\_G  
p = 0.73, beta = -0.0172, N = 1189

**IALLYETPTGWK pc2**

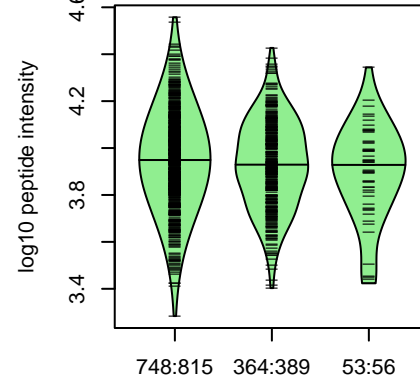

1:64113459:A:G\_G  
p = 0.05, beta = -0.0991, N = 1165

**LYIDSYEK pc2**

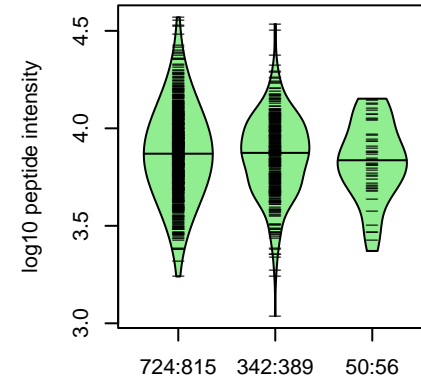

1:64113459:A:G\_G  
p = 0.19, beta = -0.0677, N = 1116

**TIEEYAVCPDLK pc2**

**A0A3B3ITK7;P36871;P36871-2**

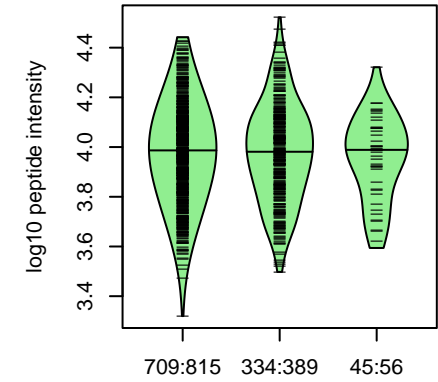

1:64113459:A:G\_G  
p = 0.62, beta = -0.0264, N = 1088

**PGM1 : NP1  
P36871**

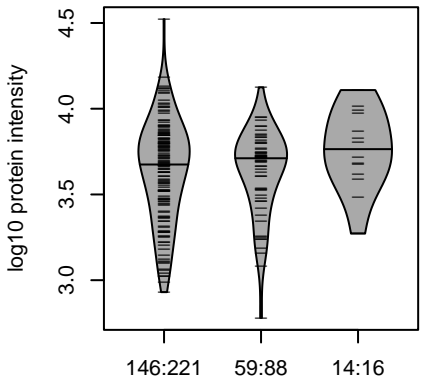

1:64113459:A:G\_G  
p = 0.69, beta = 0.0442, N = 219

**LSGTGSAGATIR pc2**

**A0A3B3ITK7;P36871;P36871-2;P368:A0A3B3ITK7;P36871;P36871-2;P368:A0A3B3ITK7;P36871;P36871-2;P368:A0A3B3ITK7;P36871;P36871-2;P368**

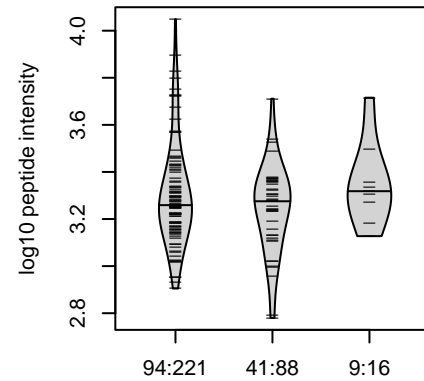

1:64113459:A:G\_G  
p = 0.61, beta = -0.0691, N = 144

**LYIDSYEK pc2**

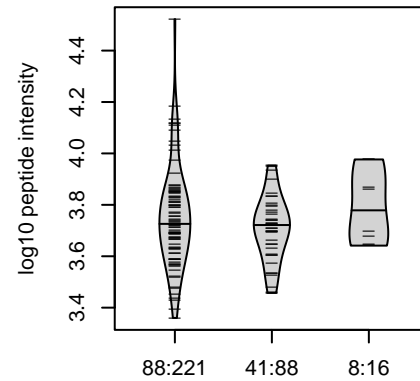

1:64113459:A:G\_G  
p = 0.56, beta = -0.0821, N = 137

**IALLYETPTGWK pc2**

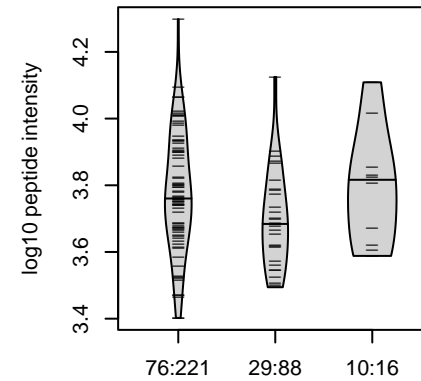

1:64113459:A:G\_G  
p = 0.16, beta = -0.195, N = 115

**SMPTSGALDR pc2**

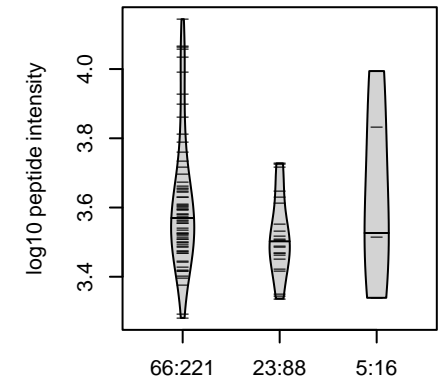

1:64113459:A:G\_G  
p = 0.3, beta = -0.179, N = 94

**IDAMHGVVGPYVK pc3  
rs1126728 REF**

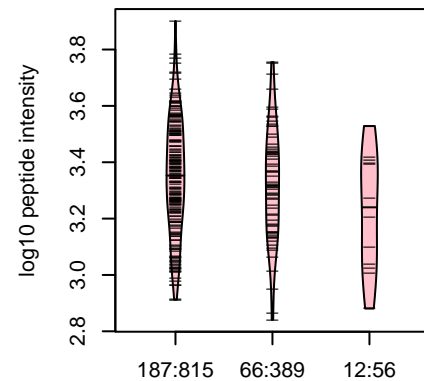

1:64113459:A:G\_G  
p = 0.025, model = REC, N = 265

Assay Target: PGM1  
Olink UniProt: P36871  
deCODE rsID: rs61765292  
Proxy rsID: rs61765292  
deCODE: 1:63647788:G:A  
Proxy SNP: 1:64113459:A:G  
deCODE log10(p): 28.4  
deCODE BETA: 0.12  
-----  
1189:1165:1116:1088:1059:104

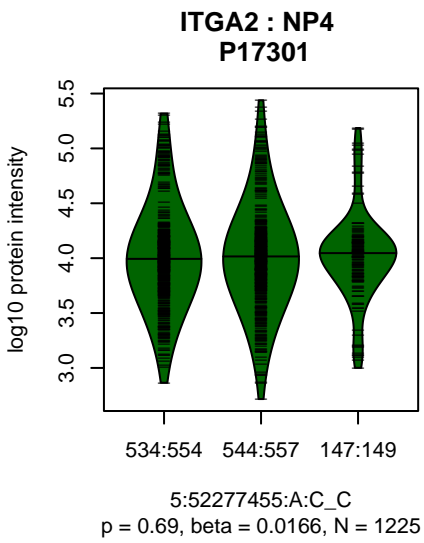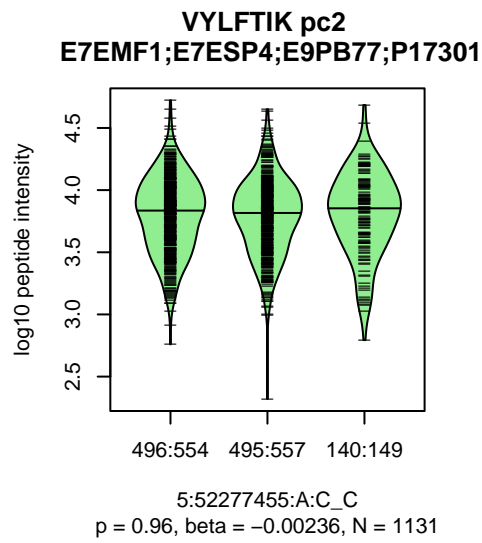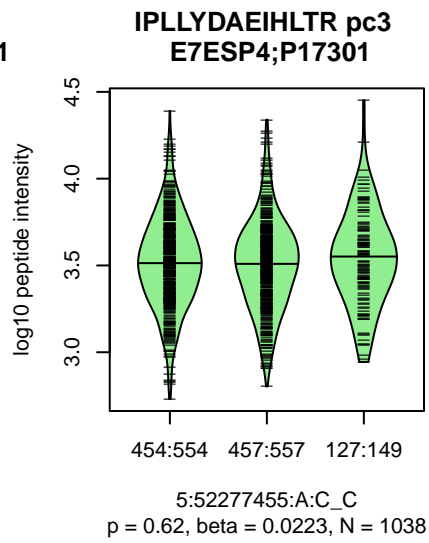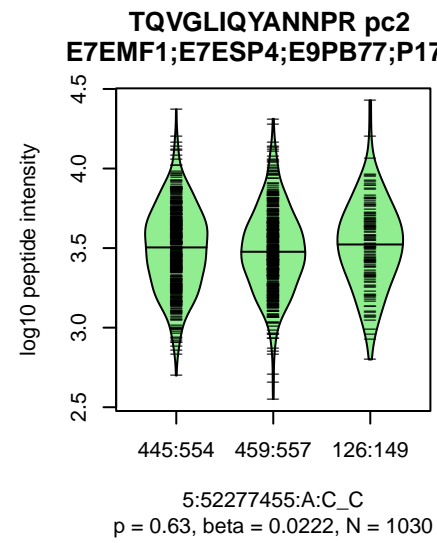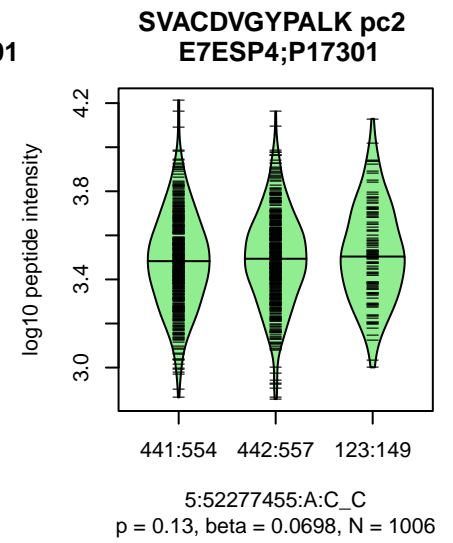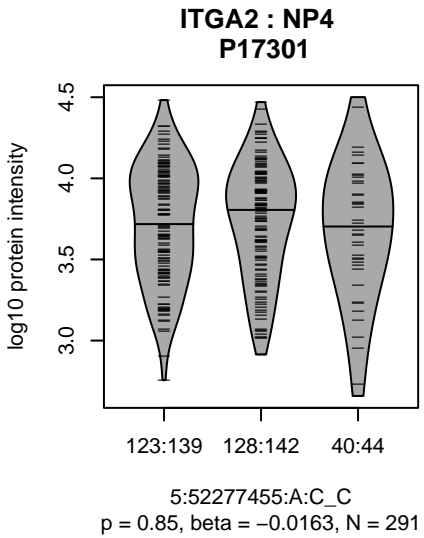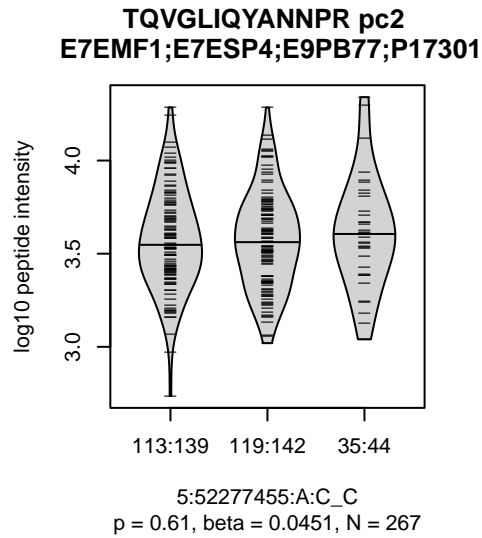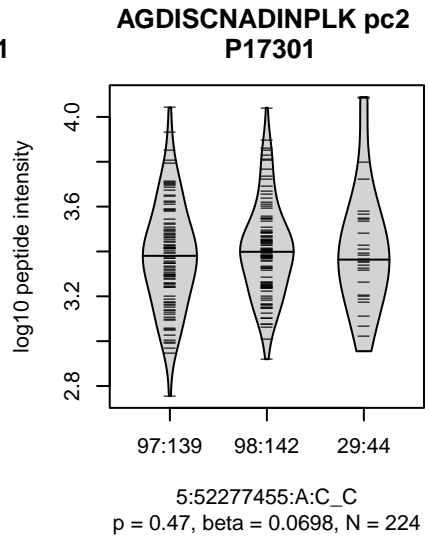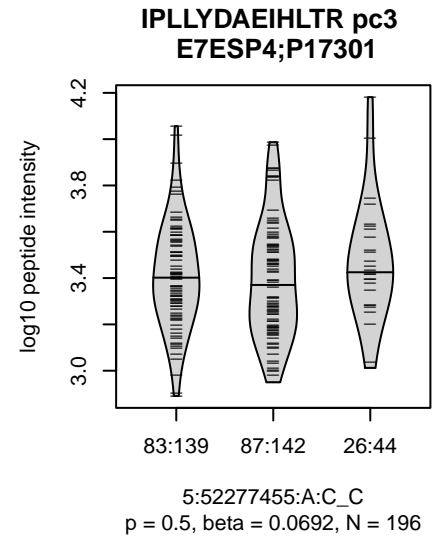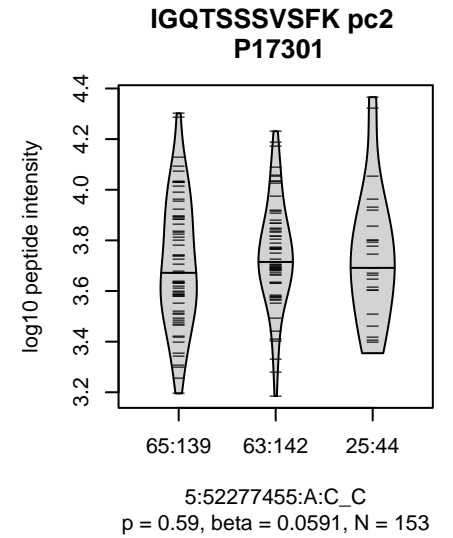

Assay Target: ITGA2  
Olink UniProt: P17301  
deCODE rsID: rs181769  
Proxy rsID: rs181769  
deCODE: 5:52981625:C:A  
Proxy SNP: 5:52277455:A:C  
deCODE log10(p): 27.8  
deCODE BETA: 0.09  
-----  
1131:1038:1030:1006:969:921:9

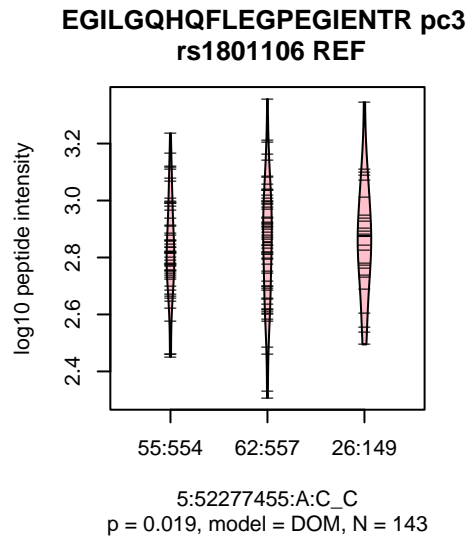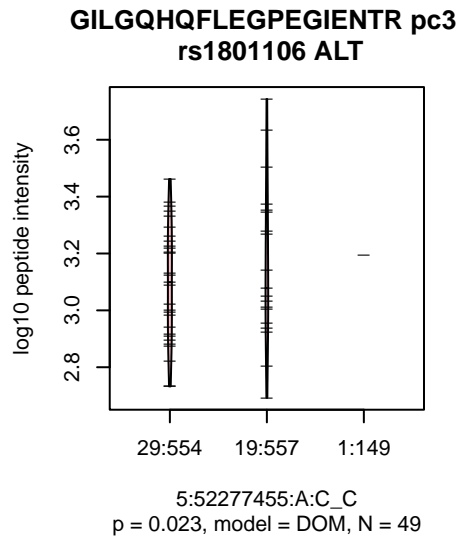

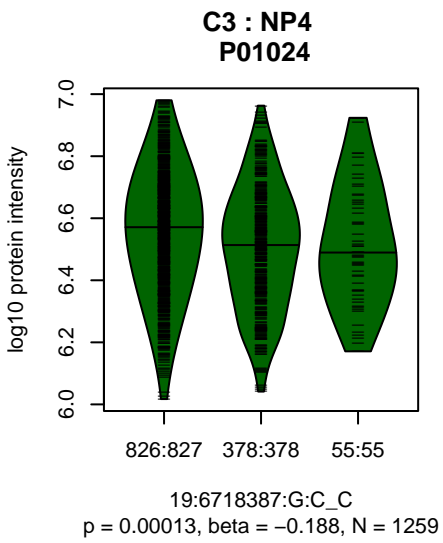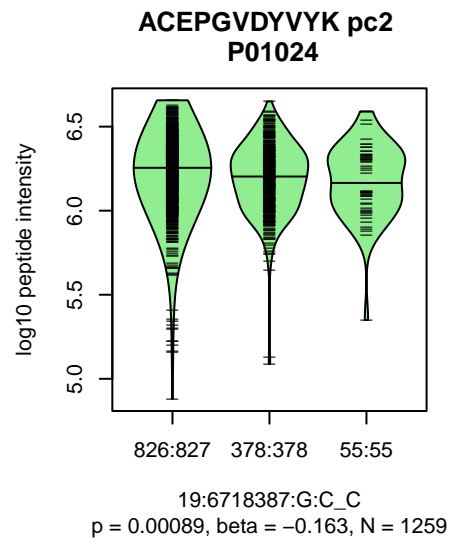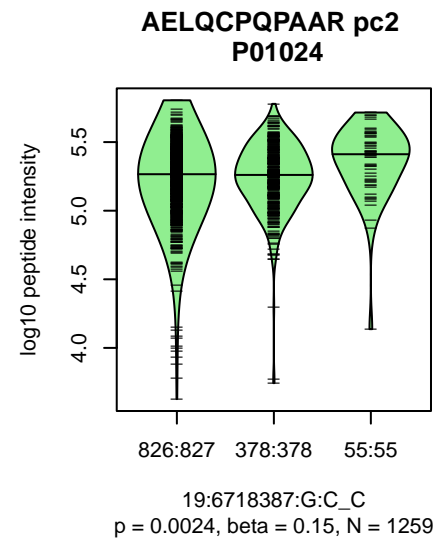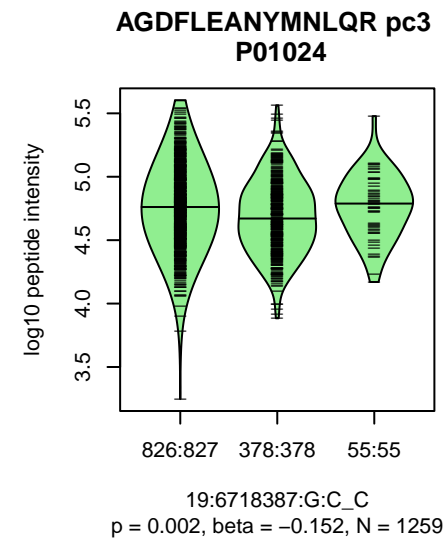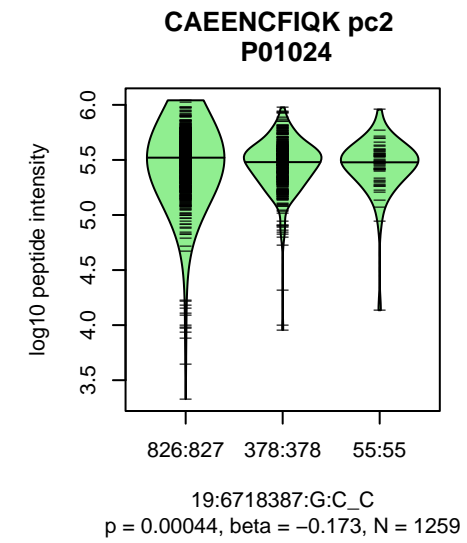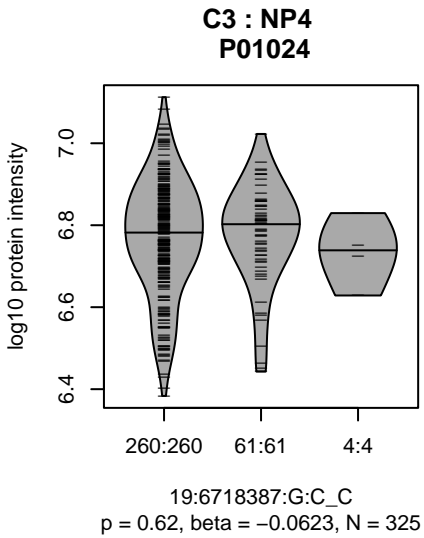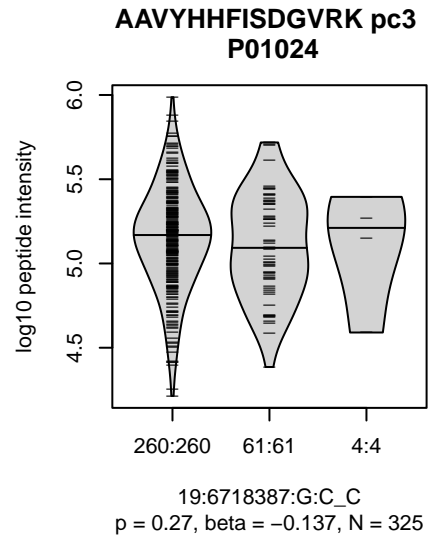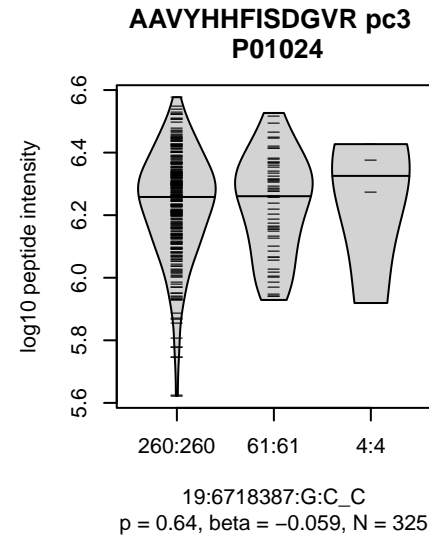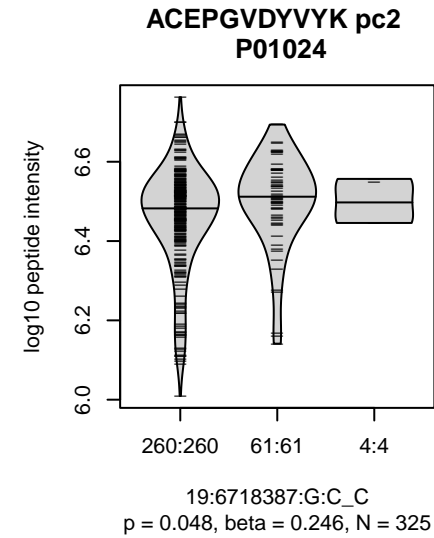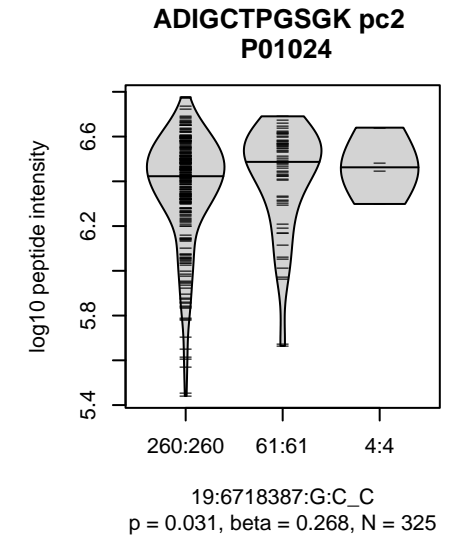

Assay Target: C3  
 Olink UniProt: P01024  
 deCODE rsID: rs2230199  
 Proxy rsID: rs2230199  
 deCODE: 19:6718376:C:G  
 Proxy SNP: 19:6718387:G:C  
 deCODE log<sub>10</sub>(p): 27.4  
 deCODE BETA: 0.1  
 \*\*\*\*\*\_\*\*\*\*\*\_\*  
 1259:1259:1259:1259:1259:125



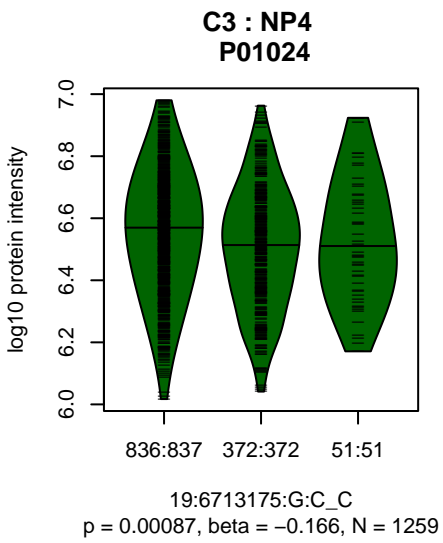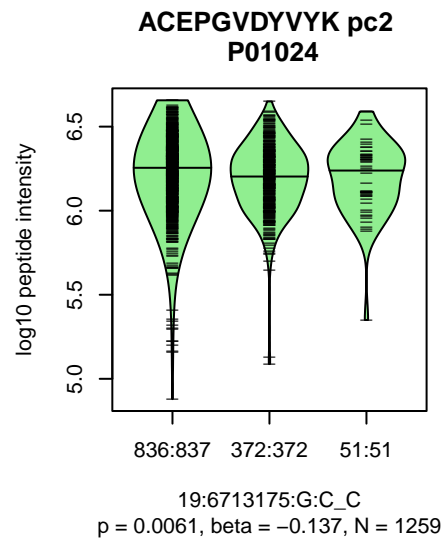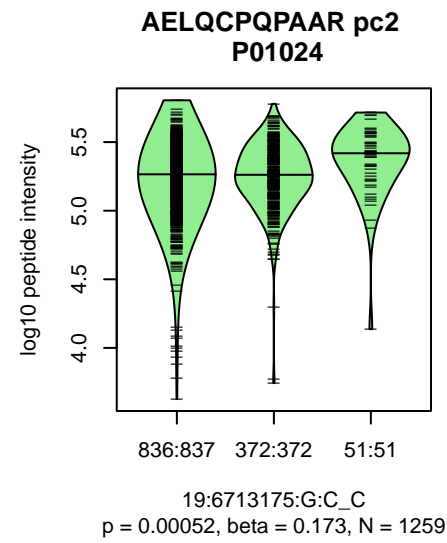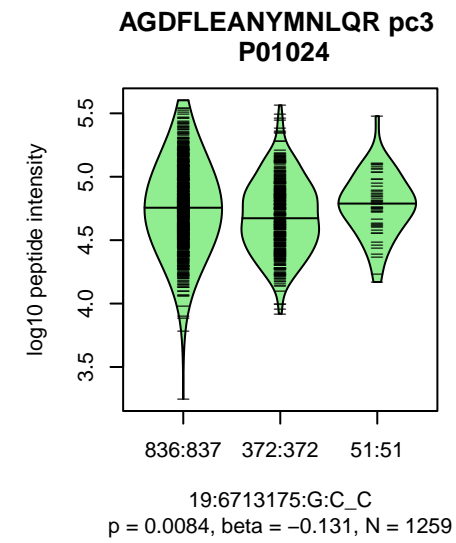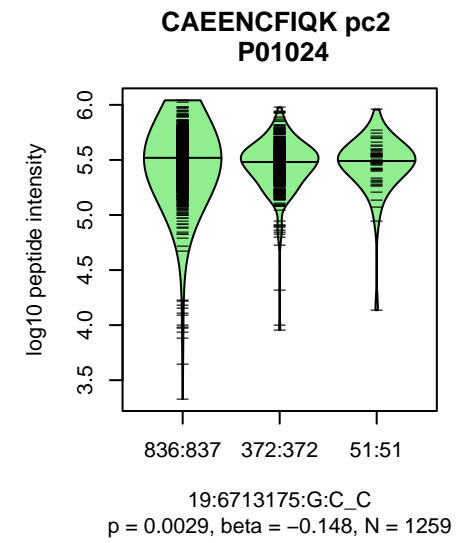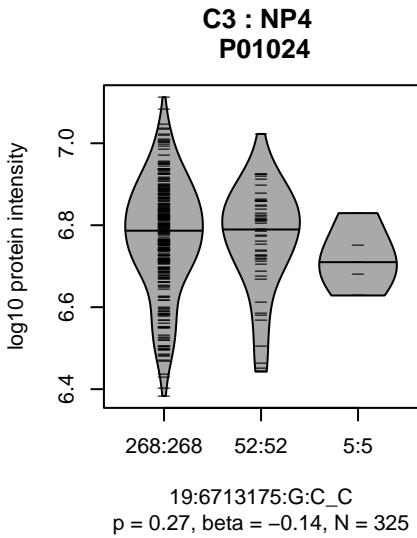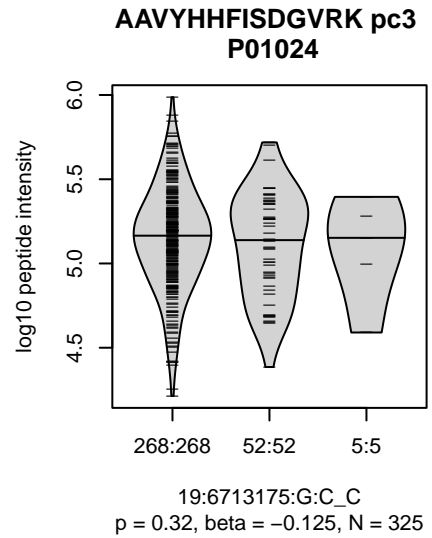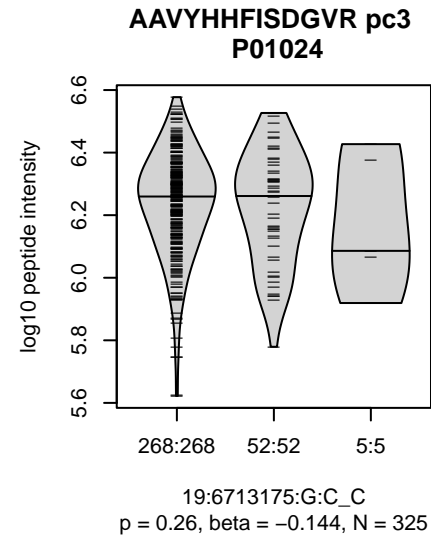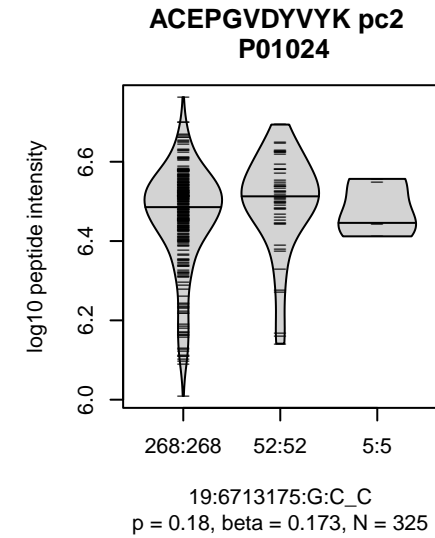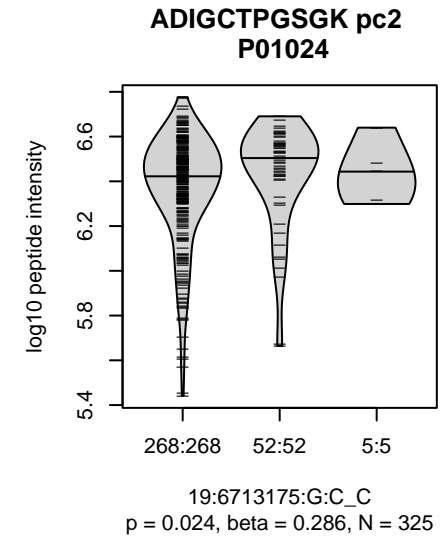

Assay Target: C3  
 Olink UniProt: P01024  
 deCODE rsID: rs11085197  
 Proxy rsID: rs11085197  
 deCODE: 19:6713164:C:G  
 Proxy SNP: 19:6713175:G:C  
 deCODE log<sub>10</sub>(p): 27.2  
 deCODE BETA: -0.1  
 \*\*\*\*\*-\*-\*-\*-\*-\*-\*-\*-  
 1259:1259:1259:1259:1259:125

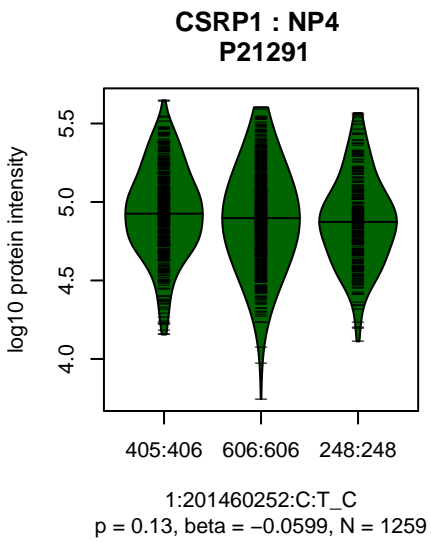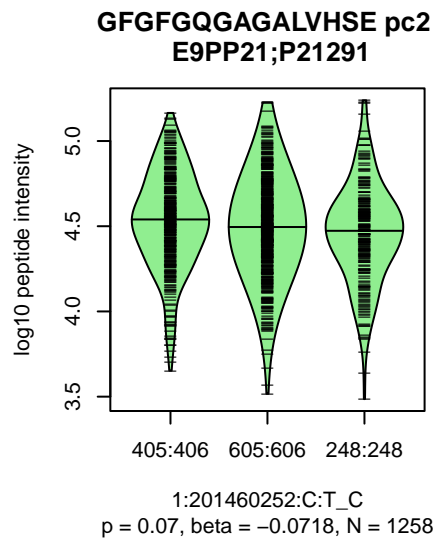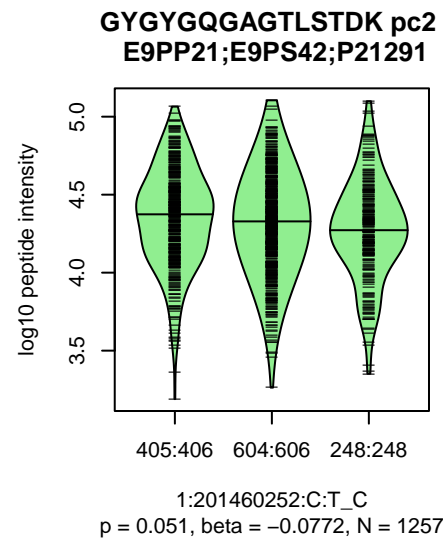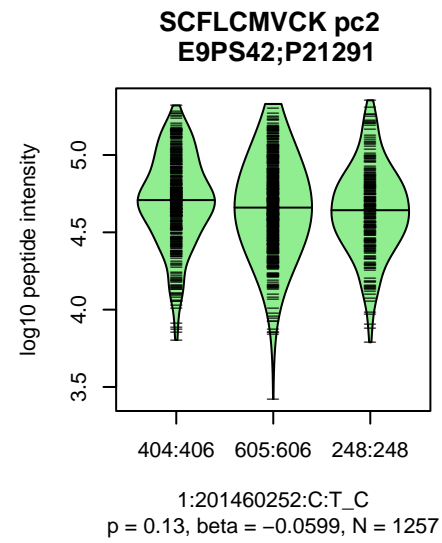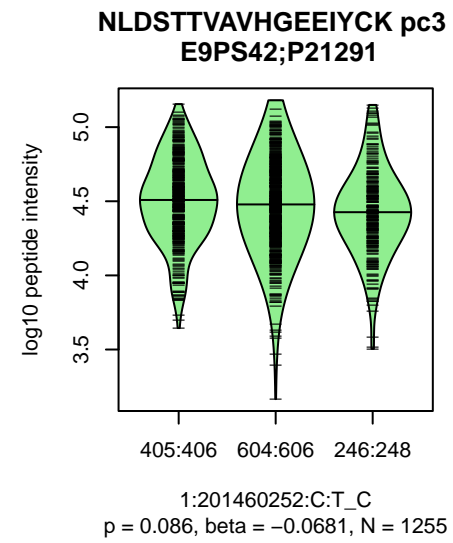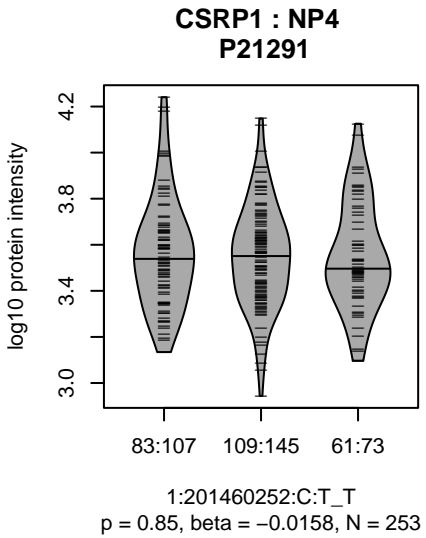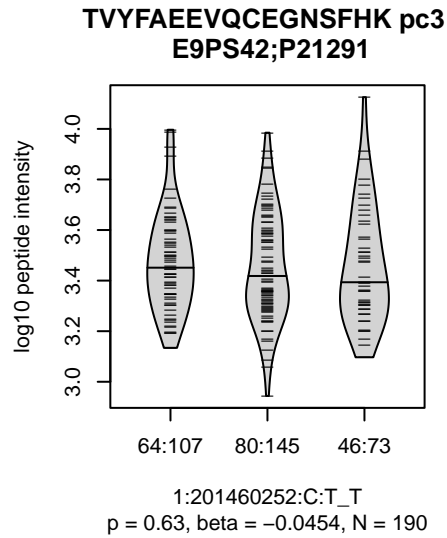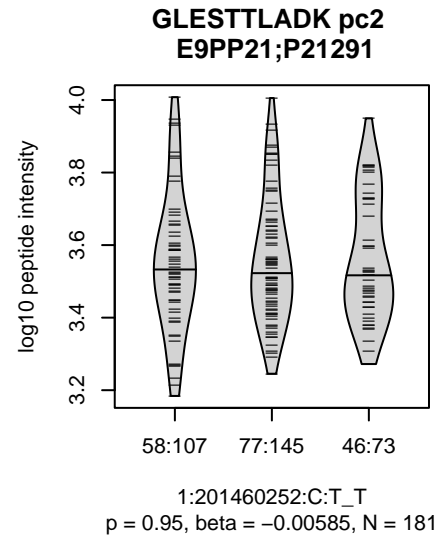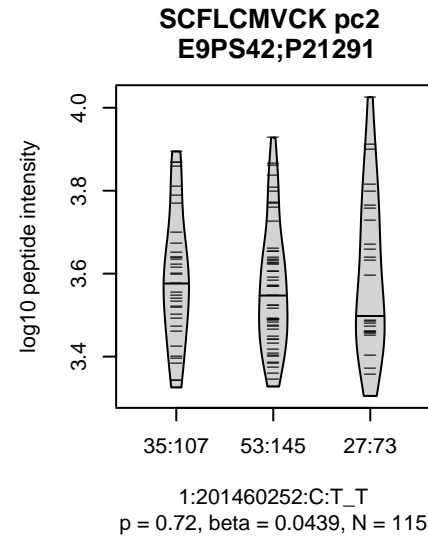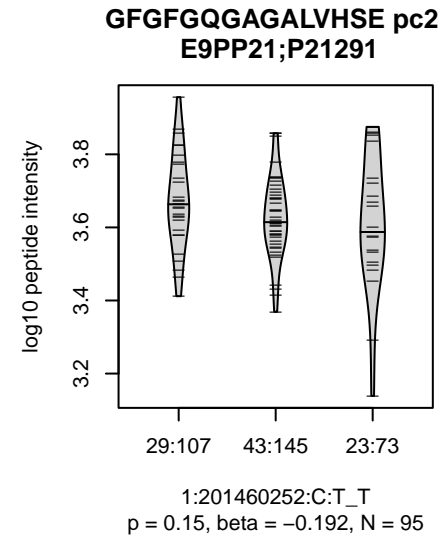

Assay Target: CSRP1  
 Olink UniProt: P21291  
 deCODE rsID: rs7527761  
 Proxy rsID: rs7527761  
 deCODE: 1:201491124:C:T  
 Proxy SNP: 1:201460252:C:T  
 deCODE log10(p): 26.9  
 deCODE BETA: -0.1  
 - - - - -  
 1258:1257:1257:1255:1244:124

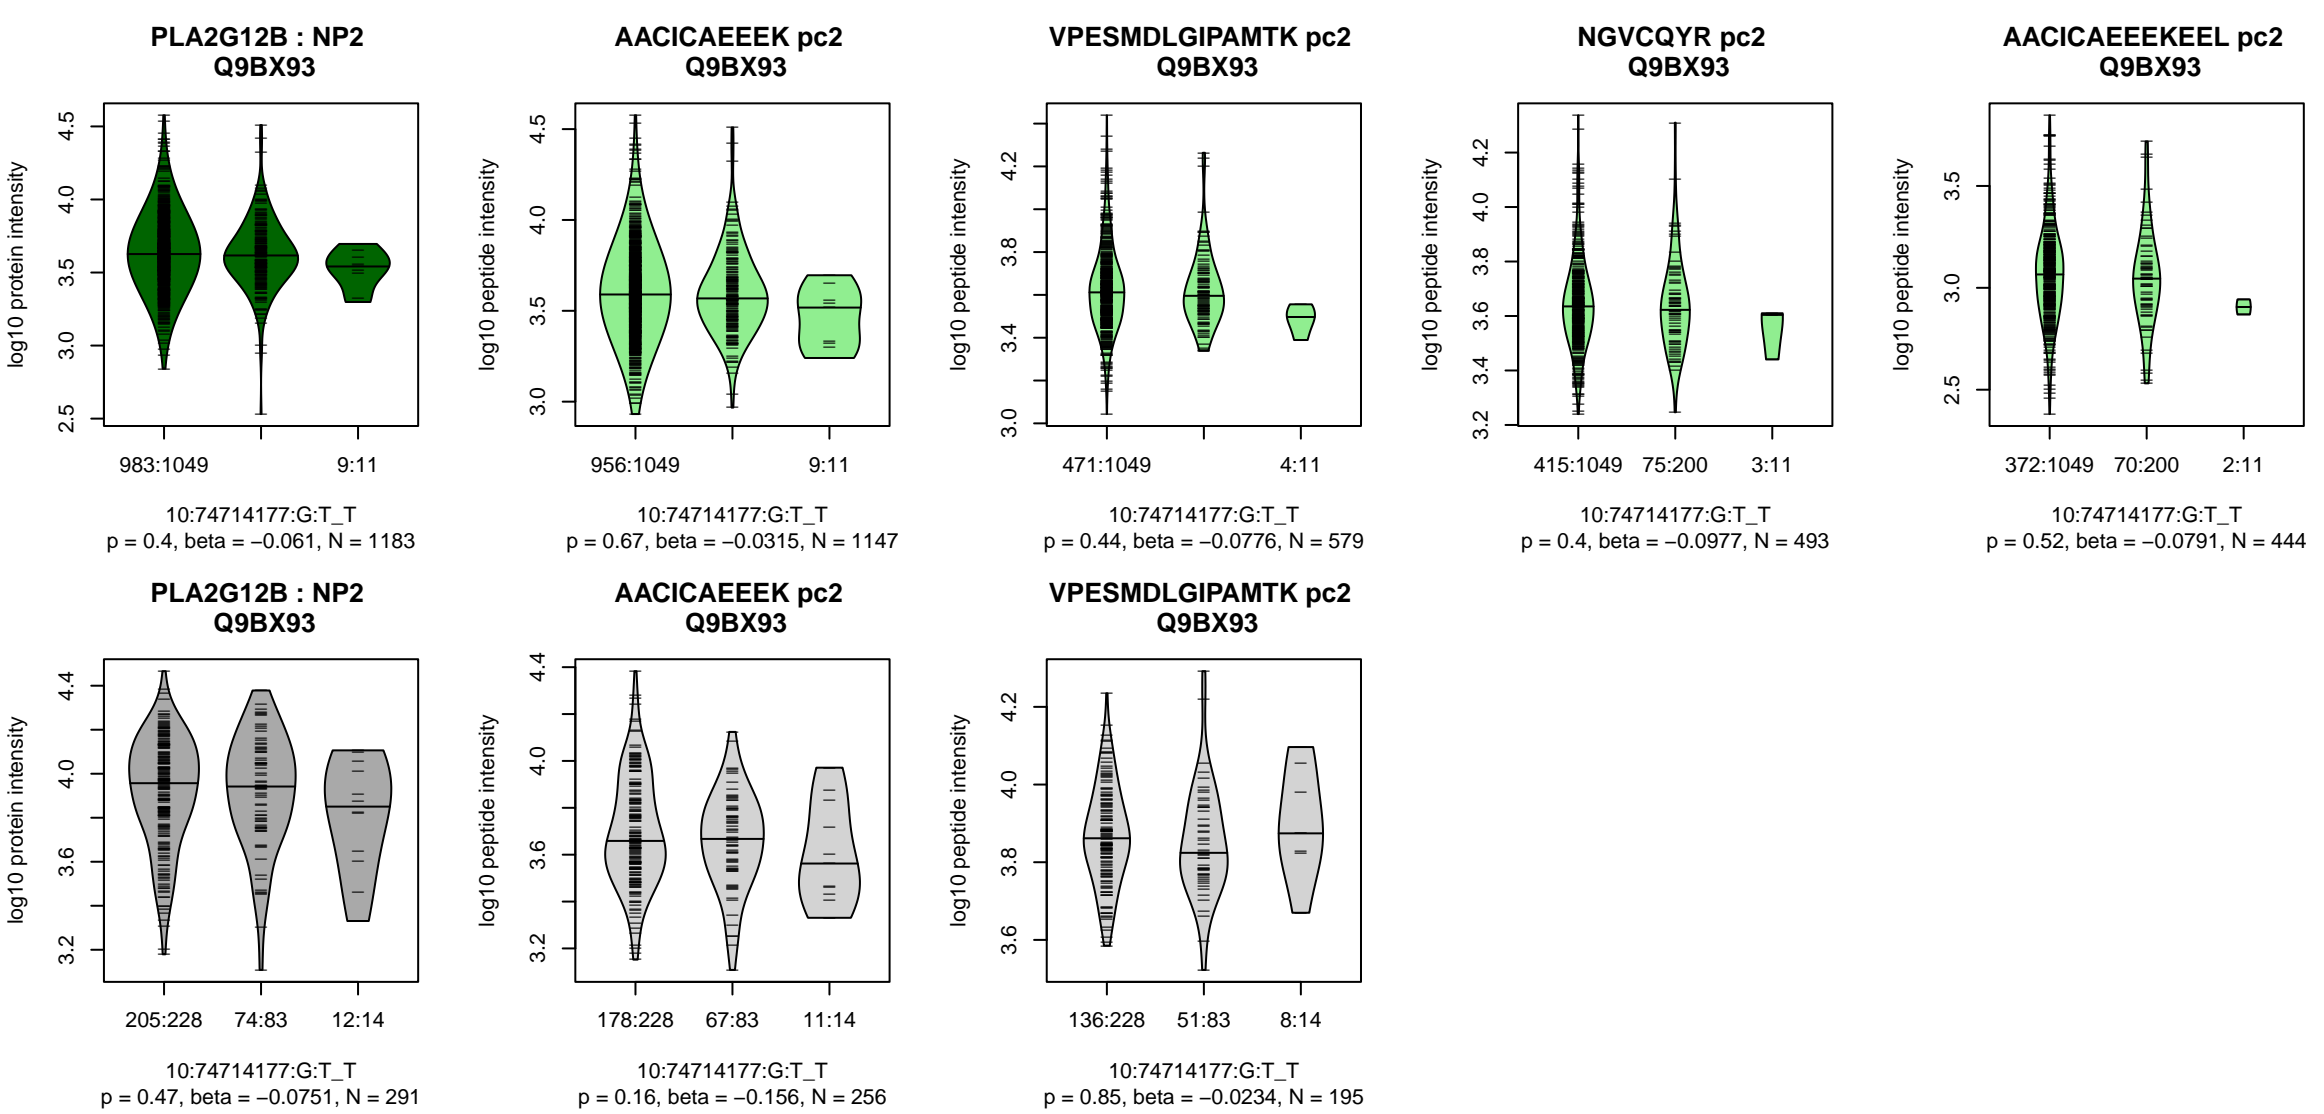

Assay Target: PLA2G12B  
 Olink UniProt: Q9BX93  
 deCODE rsID: rs3829126  
 Proxy rsID: rs3829126  
 deCODE: 10:72954419:T:G  
 Proxy SNP: 10:74714177:G:T  
 deCODE log10(p): 26.9  
 deCODE BETA: -0.15  
 -:-:-:-:-  
 1147:579:493:444:93

**ALDH1A1 : NP5**  
**P00352**

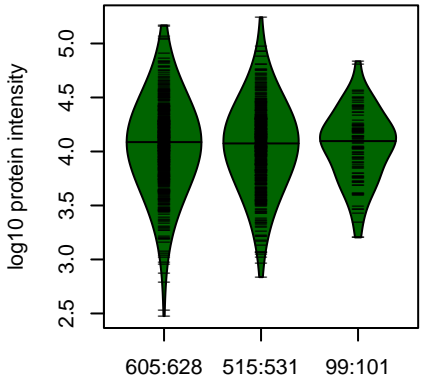

9:75553385:C:T\_T  
p = 0.54, beta = -0.0276, N = 1219

**QAFQIGSPWR pc2**  
**Q5SYQ9;P00352**

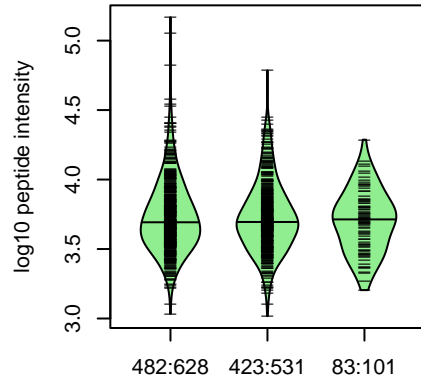

9:75553385:C:T\_T  
p = 0.32, beta = -0.0489, N = 988

**LLLATMESMNGGK pc2**  
**Q5SYQ9;P00352**

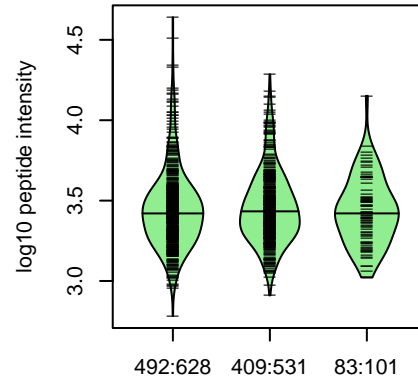

9:75553385:C:T\_T  
p = 0.76, beta = -0.0151, N = 984

**TIPIDGNFFTYTR pc2**  
**Q5SYQ9;P00352**

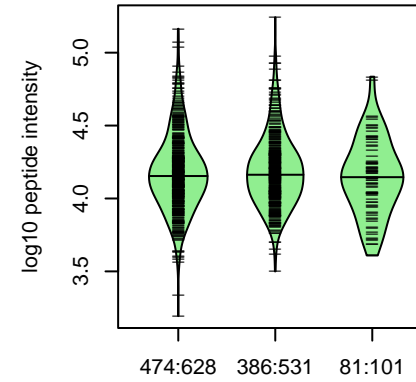

9:75553385:C:T\_T  
p = 0.48, beta = -0.0356, N = 941

**IFINNEWHDSVSGK pc3**  
**Q5SYQ9;P00352**

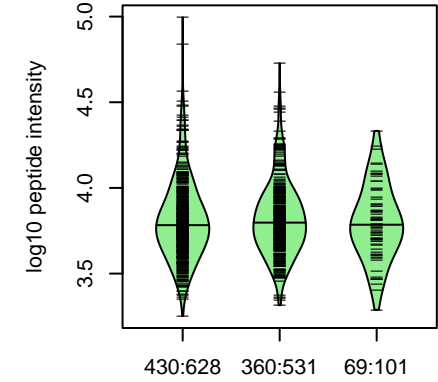

9:75553385:C:T\_T  
p = 0.85, beta = -0.0101, N = 859

**ALDH1A1 : NP5**  
**P00352**

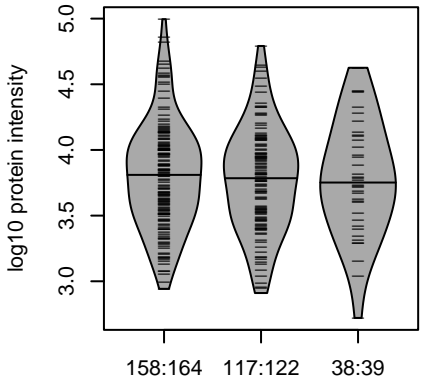

9:75553385:C:T\_T  
p = 0.36, beta = -0.0744, N = 313

**LYSNAYLNDLAGCIK pc2**  
**Q5SYQ9;P00352**

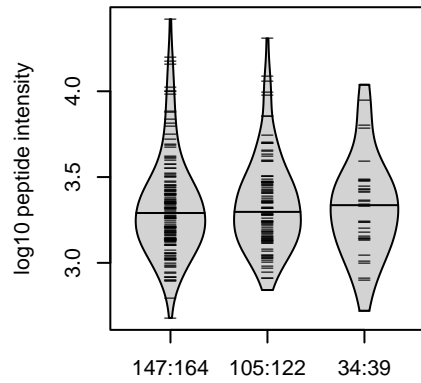

9:75553385:C:T\_T  
p = 0.97, beta = 0.00308, N = 286

**GYFVQPTVFSNVTDEMR pc2**  
**P00352**

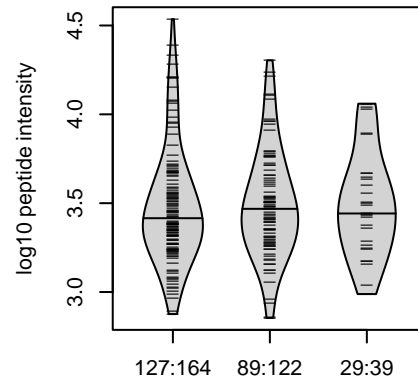

9:75553385:C:T\_T  
p = 0.84, beta = 0.0185, N = 245

**EEIFGPVQQIMK pc2**  
**P00352**

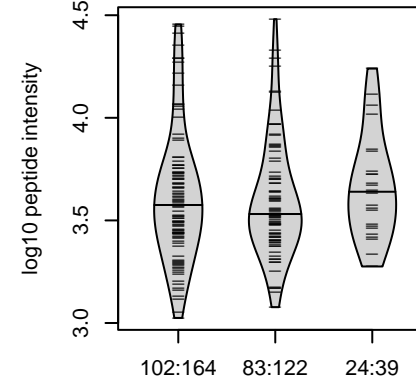

9:75553385:C:T\_T  
p = 0.51, beta = 0.0664, N = 209

**QAFQIGSPWR pc2**  
**Q5SYQ9;P00352**

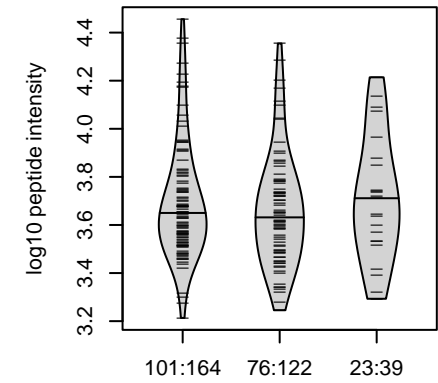

9:75553385:C:T\_T  
p = 0.64, beta = -0.0476, N = 200

Assay Target: ALDH1A1  
Olink UniProt: P00352  
deCODE rsID: rs348452  
Proxy rsID: rs348452  
deCODE: 9:72938469:T:C  
Proxy SNP: 9:75553385:C:T  
deCODE log10(p): 26.9  
deCODE BETA: 0.1  
-----  
988:984:941:859:833:830:793:7

**S100A4 : NP2  
P26447**

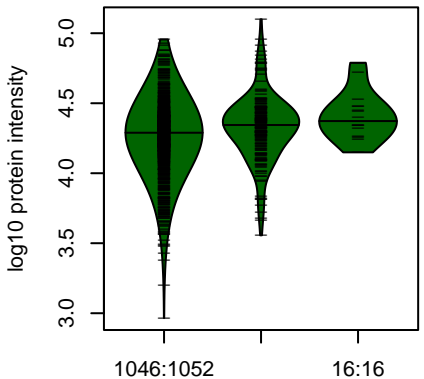

1:153520138:C:T\_T  
p = 0.0017, beta = 0.213, N = 1251

**ALDVMVSTFHK pc2  
P26447**

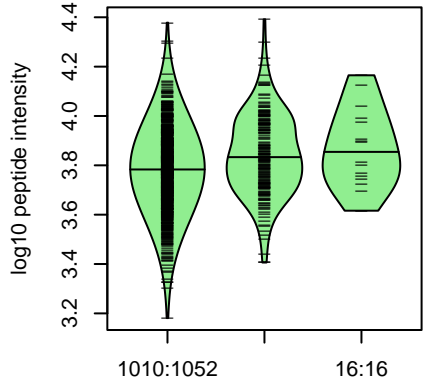

1:153520138:C:T\_T  
p = 0.00042, beta = 0.241, N = 1213

**TDEAAFQK pc2  
P26447**

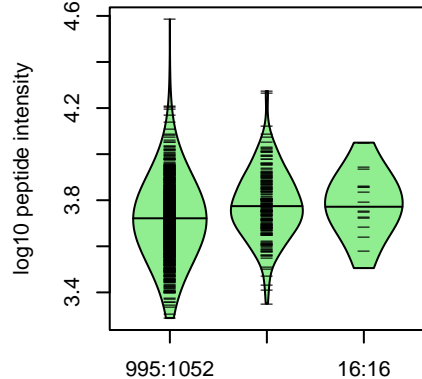

1:153520138:C:T\_T  
p = 2e-05, beta = 0.296, N = 1189

**ELPSFLGK pc2  
P26447**

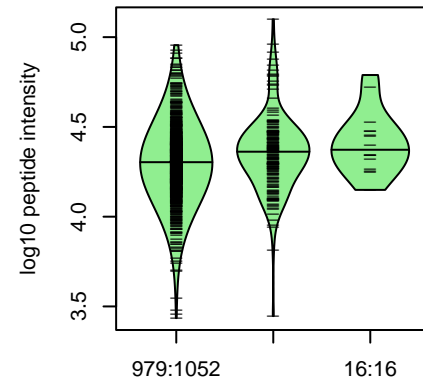

1:153520138:C:T\_T  
p = 0.017, beta = 0.165, N = 1174

**RTDEAAFQK pc2  
P26447**

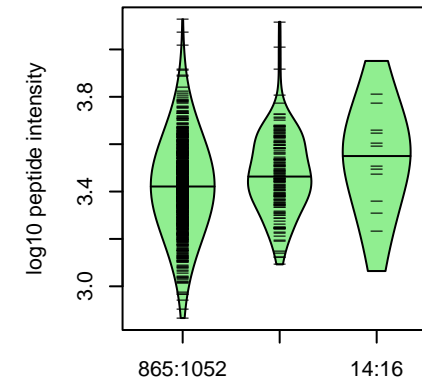

1:153520138:C:T\_T  
p = 0.0029, beta = 0.221, N = 1036

**S100A4 : NP2  
P26447**

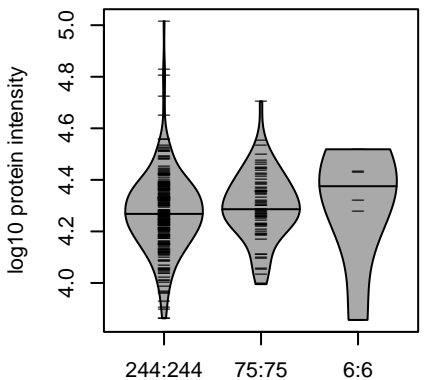

1:153520138:C:T\_T  
p = 0.35, beta = 0.107, N = 325

**ELPSFLGK pc2  
P26447**

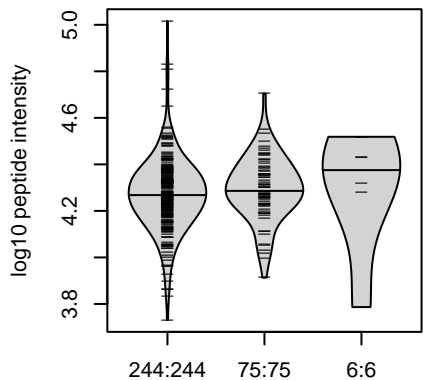

1:153520138:C:T\_T  
p = 0.36, beta = 0.104, N = 325

**ALDVMVSTFHK pc2  
P26447**

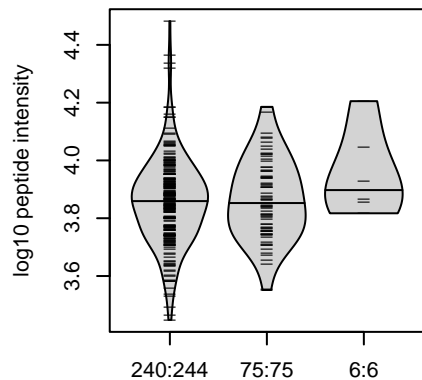

1:153520138:C:T\_T  
p = 0.45, beta = 0.085, N = 321

**TDEAAFQK pc2  
P26447**

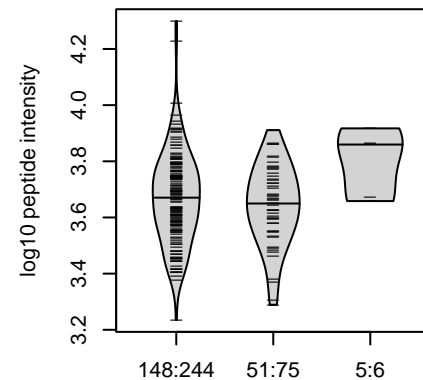

1:153520138:C:T\_T  
p = 0.94, beta = -0.0101, N = 204

**RTDEAAFQK pc2  
P26447**

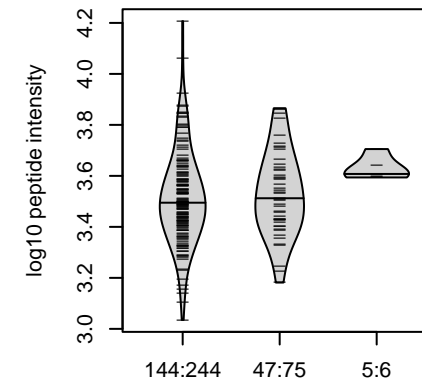

1:153520138:C:T\_T  
p = 0.2, beta = 0.175, N = 196

Assay Target: S100A4  
Olink UniProt: P26447  
deCODE rsID: rs41265162  
Proxy rsID: rs41265162  
deCODE: 1:153547662:T:C  
Proxy SNP: 1:153520138:C:T  
deCODE log10(p): 26.4  
deCODE BETA: 0.21  
\*.\*-.\*:NA  
1213:1189:1174:1036:17

**SYK : NP1**  
**P43405**

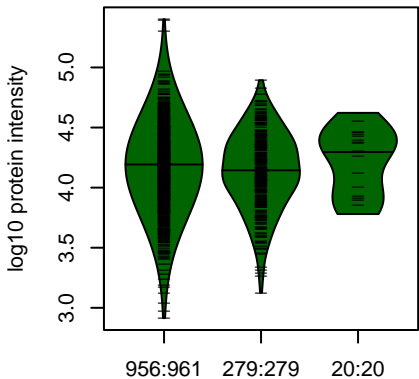

9:93581614:C:T\_T  
p = 0.3, beta = -0.0624, N = 1255

**ISREESEQIVLIGSK pc3**  
**P43405;P43405-2**

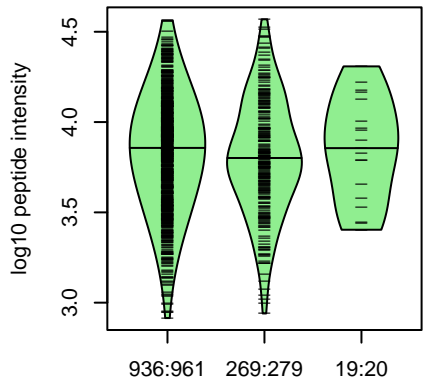

9:93581614:C:T\_T  
p = 0.36, beta = -0.0555, N = 1224

**LIATTAHEK pc2**  
**P43405;P43405-2**

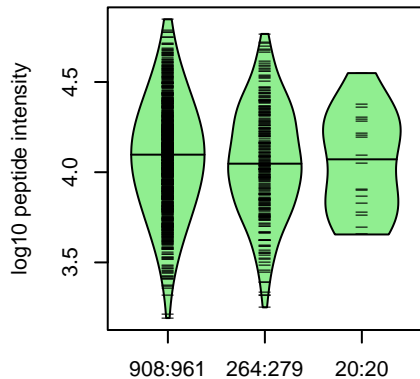

9:93581614:C:T\_T  
p = 0.13, beta = -0.0914, N = 1192

**WYAPECINYYK pc2**  
**P43405;P43405-2**

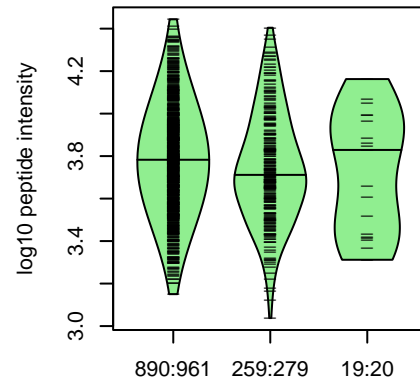

9:93581614:C:T\_T  
p = 0.0095, beta = -0.16, N = 1168

**NYLGGFALSVAHGR pc2**  
**P43405;P43405-2**

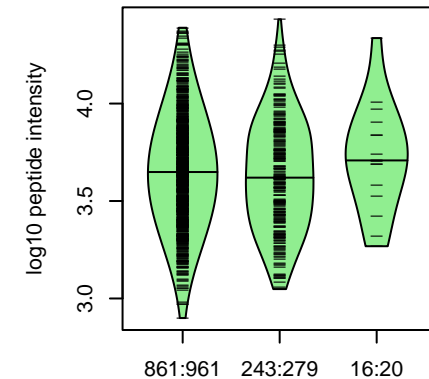

9:93581614:C:T\_T  
p = 0.52, beta = -0.0411, N = 1120

**SYK : NP1**  
**P43405;P43405-2**

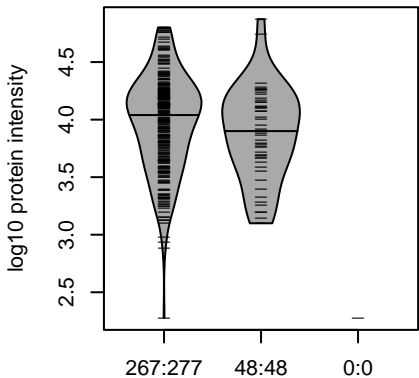

9:93581614:C:T\_T  
p = 0.17, beta = -0.215, N = 315

**ISREESEQIVLIGSK pc3**  
**P43405;P43405-2**

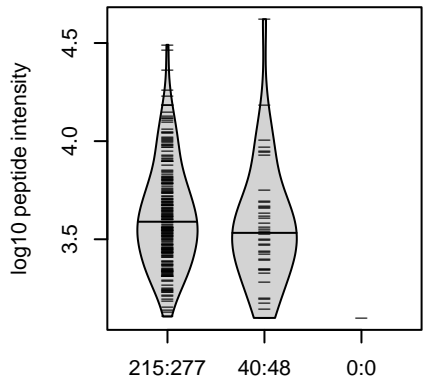

9:93581614:C:T\_T  
p = 0.31, beta = -0.171, N = 255

**LIATTAHEK pc2**  
**P43405;P43405-2**

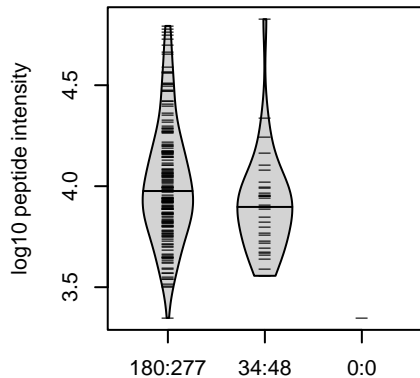

9:93581614:C:T\_T  
p = 0.1, beta = -0.302, N = 214

**NVLLVTQHYAK pc3**  
**P43405;P43405-2**

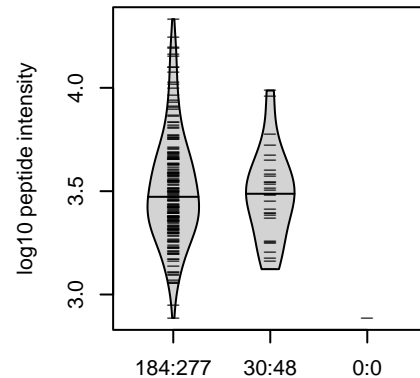

9:93581614:C:T\_T  
p = 0.61, beta = -0.098, N = 214

**YLEESNFVHR pc2**  
**P43405;P43405-2**

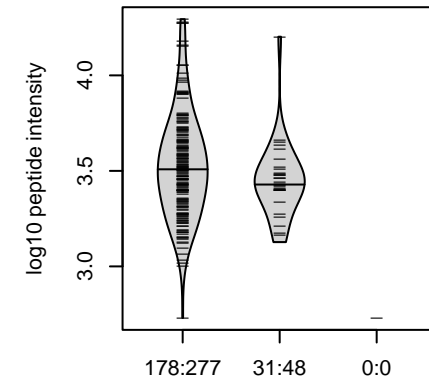

9:93581614:C:T\_T  
p = 0.096, beta = -0.318, N = 209

Assay Target: SYK  
Olink UniProt: P43405  
deCODE rsID: rs75505307  
Proxy rsID: rs75505307  
deCODE: 9:90819332:T:C  
Proxy SNP: 9:93581614:C:T  
deCODE log10(p): 26.1  
deCODE BETA: -0.13  
-----\*-----  
1224:1192:1168:1120:1101:109

**SHH : NP4  
Q15465**

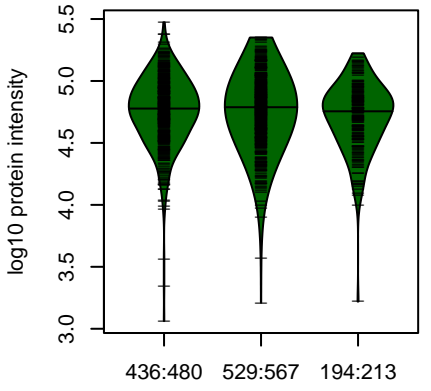

7:156173238:T:C\_C  
p = 0.13, beta = -0.0618, N = 1159

**QFIPNVAEK pc2  
Q15465**

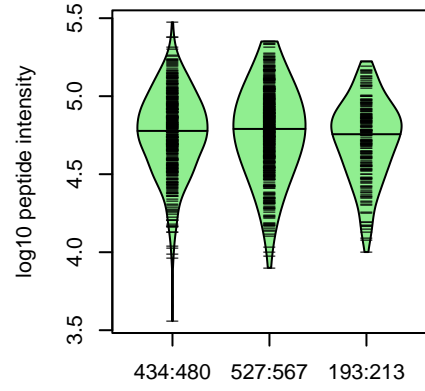

7:156173238:T:C\_C  
p = 0.15, beta = -0.0593, N = 1154

**ELTPNYNPDIIFK pc2  
Q14623;Q15465**

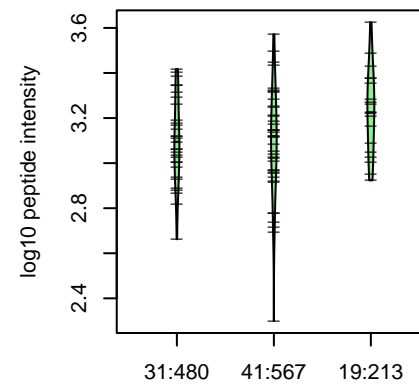

7:156173238:T:C\_C  
p = 0.072, beta = 0.249, N = 91

Assay Target: SHH  
Olink UniProt: Q15465  
deCODE rsID: rs10225292  
Proxy rsID: rs10225292  
deCODE: 7:156380544:C:T  
Proxy SNP: 7:156173238:T:C  
deCODE log10(p): 25.7  
deCODE BETA: -0.09  
-:-  
1154:91





**SYK : NP1**  
**P43405**

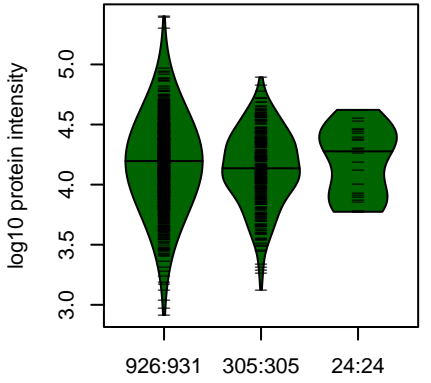

9:93575549:G:A\_A  
p = 0.19, beta = -0.0756, N = 1255

**ISREESEQIVLIGSK pc3**  
**P43405;P43405-2**

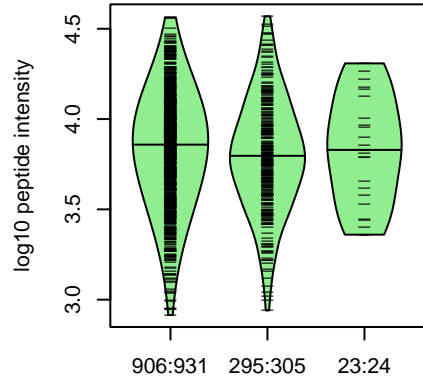

9:93575549:G:A\_A  
p = 0.21, beta = -0.0727, N = 1224

**LIATTAHEK pc2**  
**P43405;P43405-2**

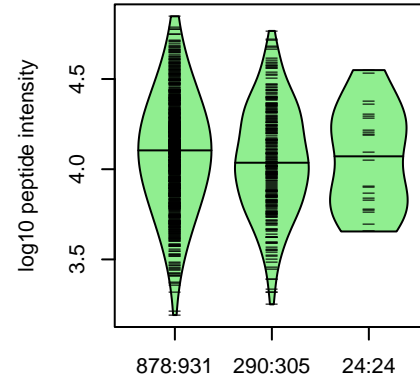

9:93575549:G:A\_A  
p = 0.058, beta = -0.111, N = 1192

**WYAPECINYYK pc2**  
**P43405;P43405-2**

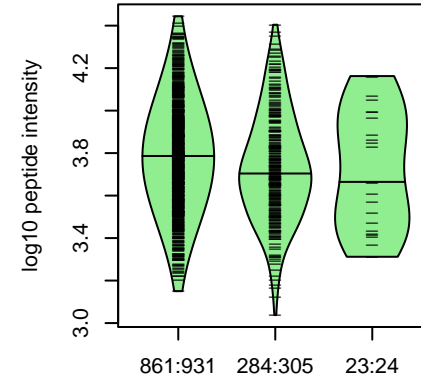

9:93575549:G:A\_A  
p = 0.0022, beta = -0.181, N = 1168

**NYLGGFALSVAHGR pc2**  
**P43405;P43405-2**

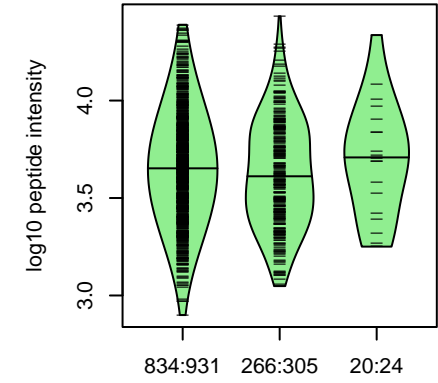

9:93575549:G:A\_A  
p = 0.32, beta = -0.0615, N = 1120

**SYK : NP1**  
**P43405;P43405-2**

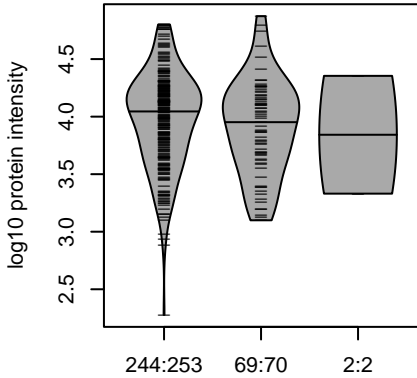

9:93575549:G:A\_A  
p = 0.16, beta = -0.178, N = 315

**ISREESEQIVLIGSK pc3**  
**P43405;P43405-2**

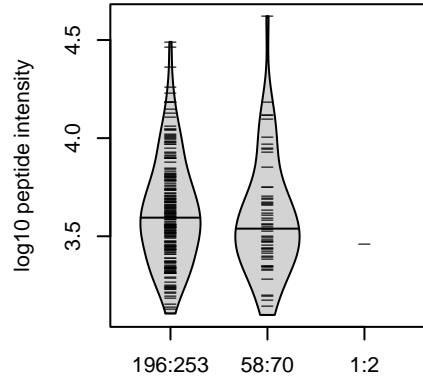

9:93575549:G:A\_A  
p = 0.23, beta = -0.171, N = 255

**LIATTAHEK pc2**  
**P43405;P43405-2**

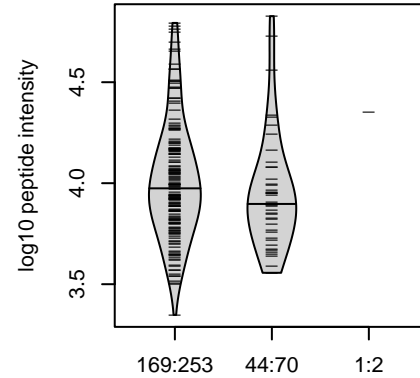

9:93575549:G:A\_A  
p = 0.18, beta = -0.213, N = 214

**NVLLVTQHYAK pc3**  
**P43405;P43405-2**

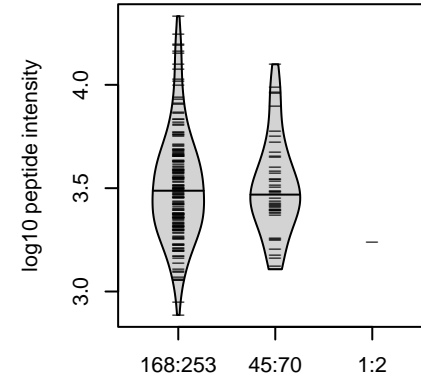

9:93575549:G:A\_A  
p = 0.62, beta = -0.0774, N = 214

**YLEESNFVHR pc2**  
**P43405;P43405-2**

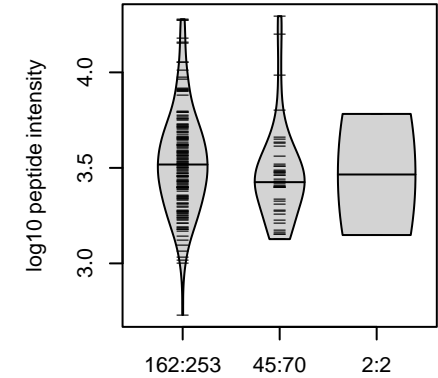

9:93575549:G:A\_A  
p = 0.055, beta = -0.291, N = 209

Assay Target: SYK  
 Olink UniProt: P43405  
 deCODE rsID: rs72729008  
 Proxy rsID: rs72729008  
 deCODE: 9:90813267:A:G  
 Proxy SNP: 9:93575549:G:A  
 deCODE log10(p): 25.1  
 deCODE BETA: -0.12  
 -----\*-----  
 1224:1192:1168:1120:1101:109



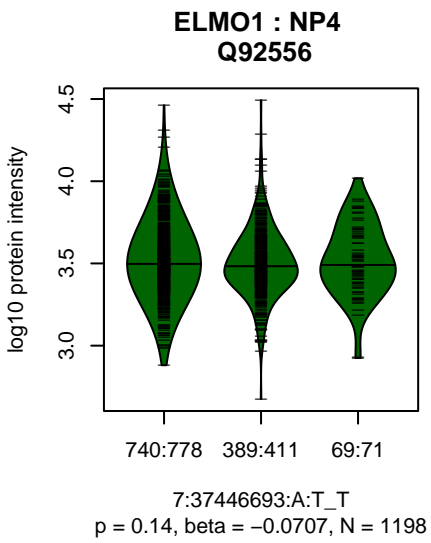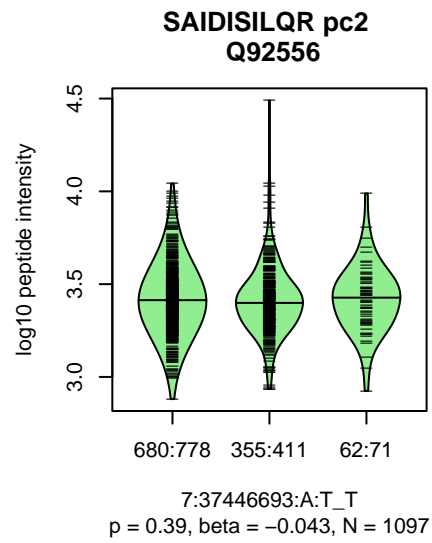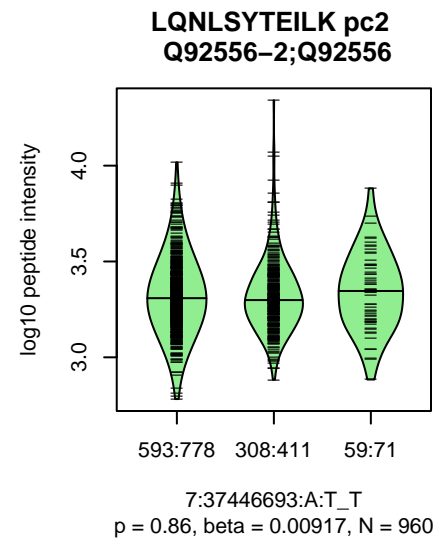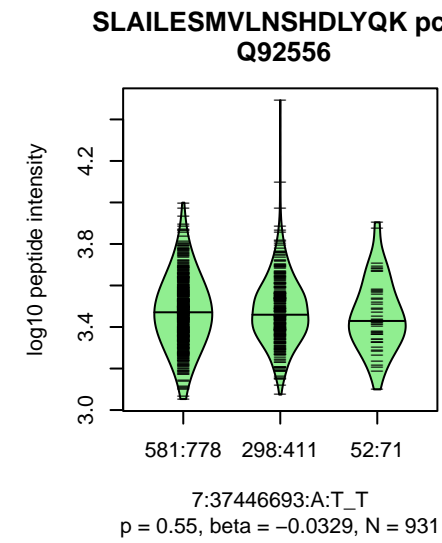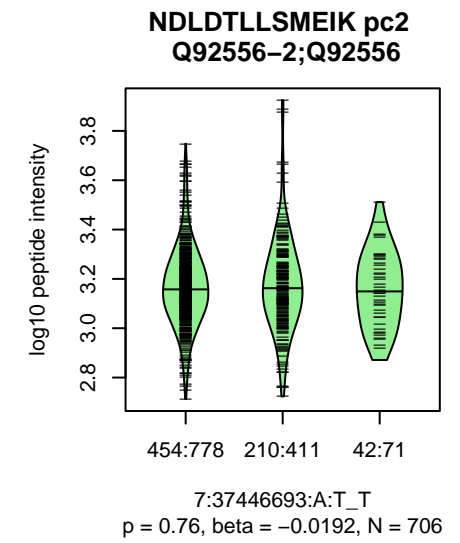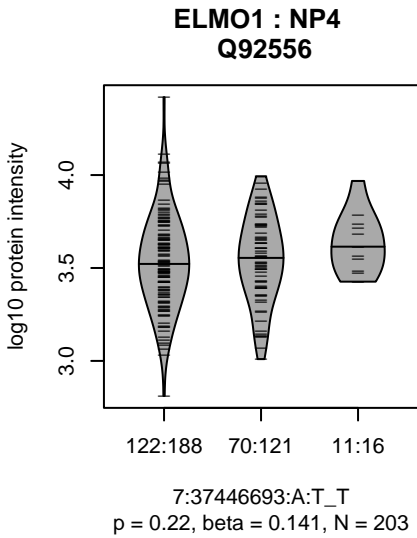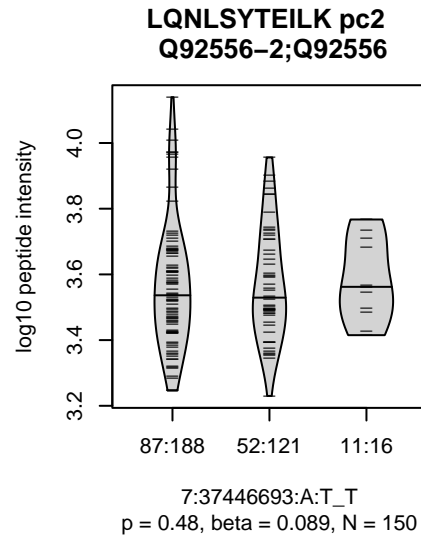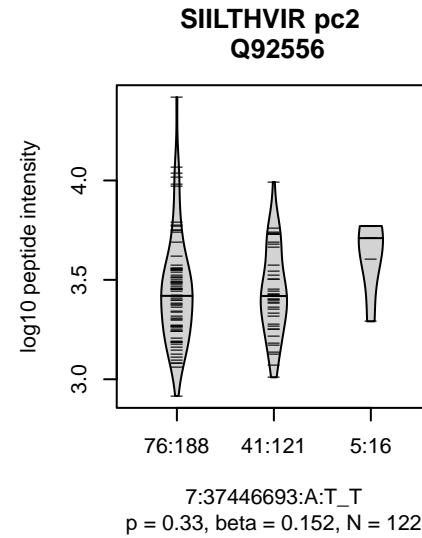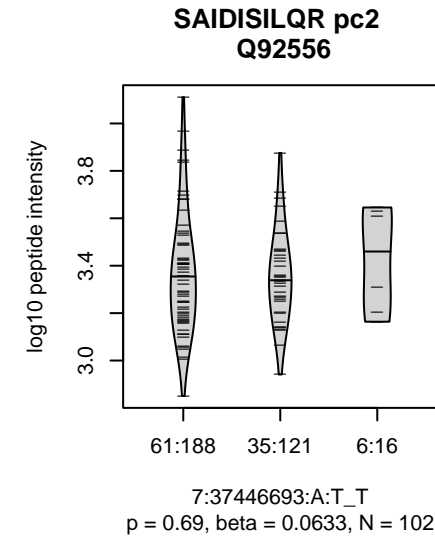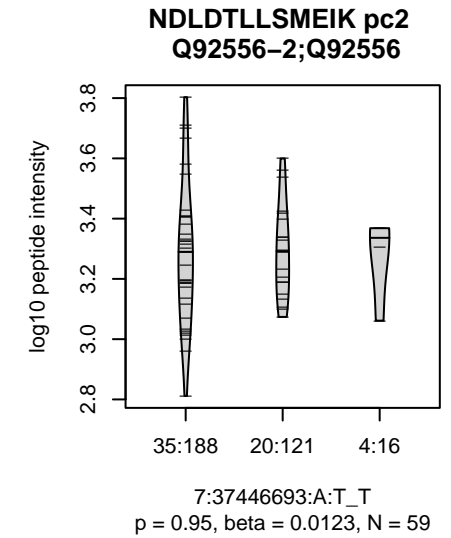

Assay Target: ELMO1  
 Olink UniProt: Q92556  
 deCODE rsID: rs7782999  
 Proxy rsID: rs7782999  
 deCODE: 7:37407090:T:A  
 Proxy SNP: 7:37446693:A:T  
 deCODE log10(p): 24.4  
 deCODE BETA: -0.1  
 -----  
 1097:960:931:706:652:421:343:

**PCSK2 : NP2**  
**P16519-3**

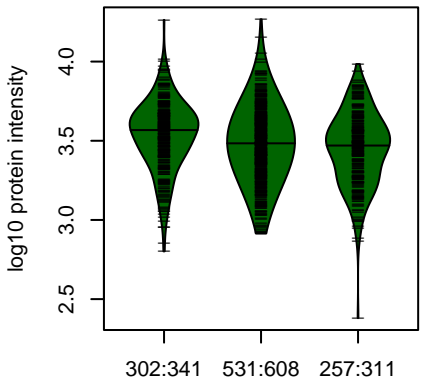

20:17230617:A:G\_G  
p = 1.9e-06, beta = -0.2, N = 1090

**LVLTLTDDACEGK pc2**  
**P16519;P16519-2;P16519-3**

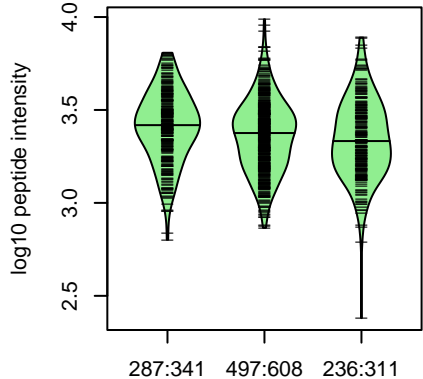

20:17230617:A:G\_G  
p = 3.6e-05, beta = -0.18, N = 1020

**ELTLQAMADGVNK pc2**  
**P16519;P16519-2;P16519-3**

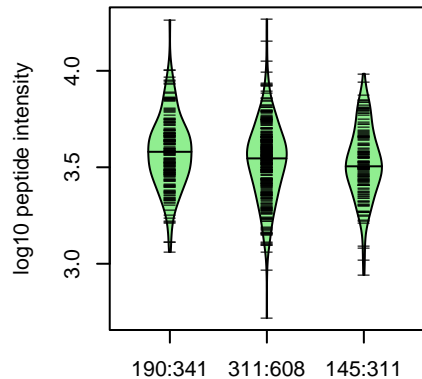

20:17230617:A:G\_G  
p = 0.0021, beta = -0.167, N = 646

**MALQQEGFDR pc2**  
**P16519;P16519-2;P16519-3**

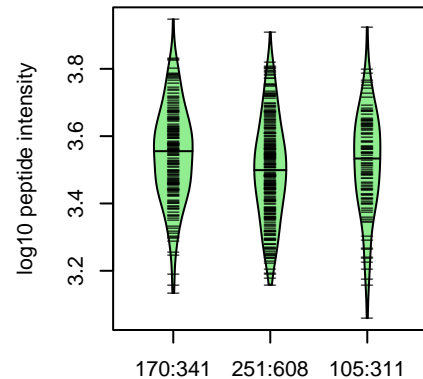

20:17230617:A:G\_G  
p = 0.08, beta = -0.106, N = 526

**GTWTLELGFVGSAPQK pc2**  
**P16519;P16519-2;P16519-3**

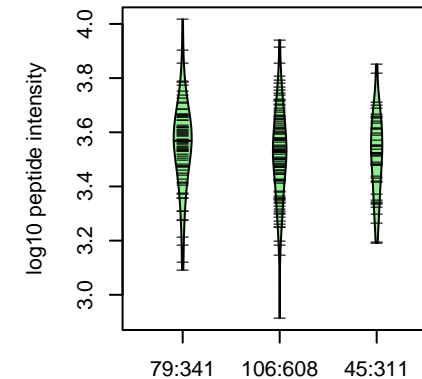

20:17230617:A:G\_G  
p = 0.43, beta = -0.0714, N = 230

**PCSK2 : NP2**  
**P16519;P16519-2;P16519-3**

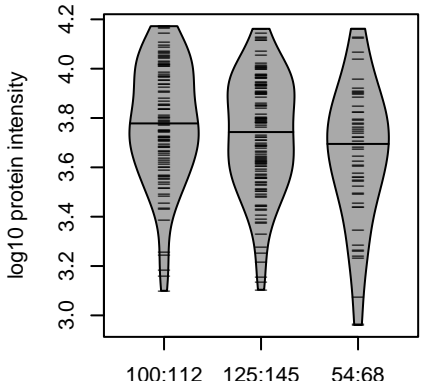

20:17230617:A:G\_G  
p = 0.0022, beta = -0.248, N = 279

**LVLTLTDDACEGK pc2**  
**P16519;P16519-2;P16519-3**

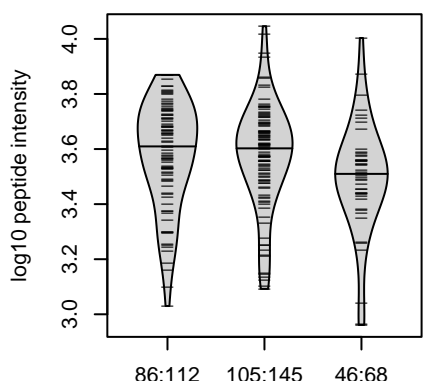

20:17230617:A:G\_G  
p = 0.016, beta = -0.21, N = 237

**ELTLQAMADGVNK pc2**  
**P16519;P16519-2;P16519-3**

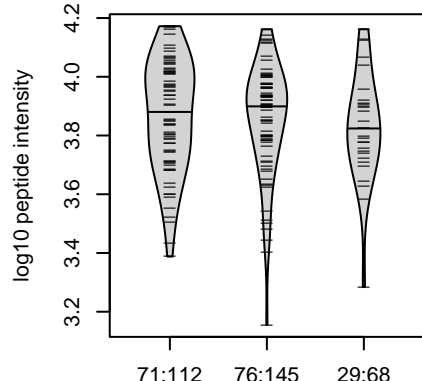

20:17230617:A:G\_G  
p = 0.52, beta = -0.066, N = 176

**FHCVGGSVQDPEK pc3**  
**P16519;P16519-2;P16519-3**

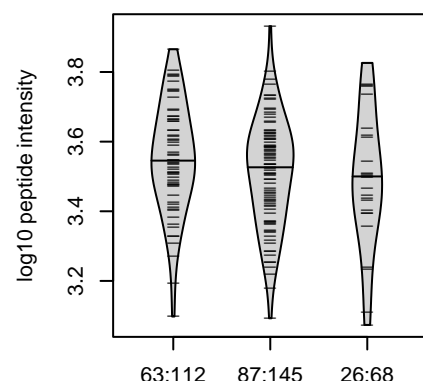

20:17230617:A:G\_G  
p = 0.17, beta = -0.15, N = 176

**MALQQEGFDR pc2**  
**P16519;P16519-2;P16519-3**

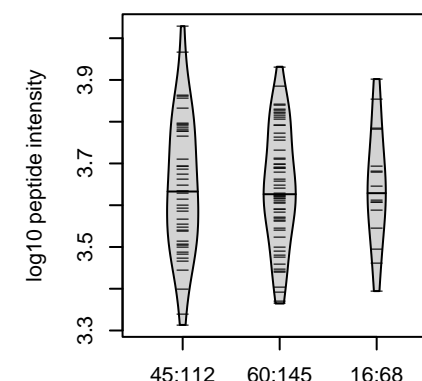

20:17230617:A:G\_G  
p = 0.89, beta = 0.0188, N = 121

Assay Target: PCSK2  
Olink UniProt: P16519  
deCODE rsID: rs6044699  
Proxy rsID: rs6044699  
deCODE: 20:17249972:A:G  
Proxy SNP: 20:17230617:A:G  
deCODE log10(p): 23.9  
deCODE BETA: 0.08  
\*.\*-:-:-:-  
1020:646:526:230:226:199

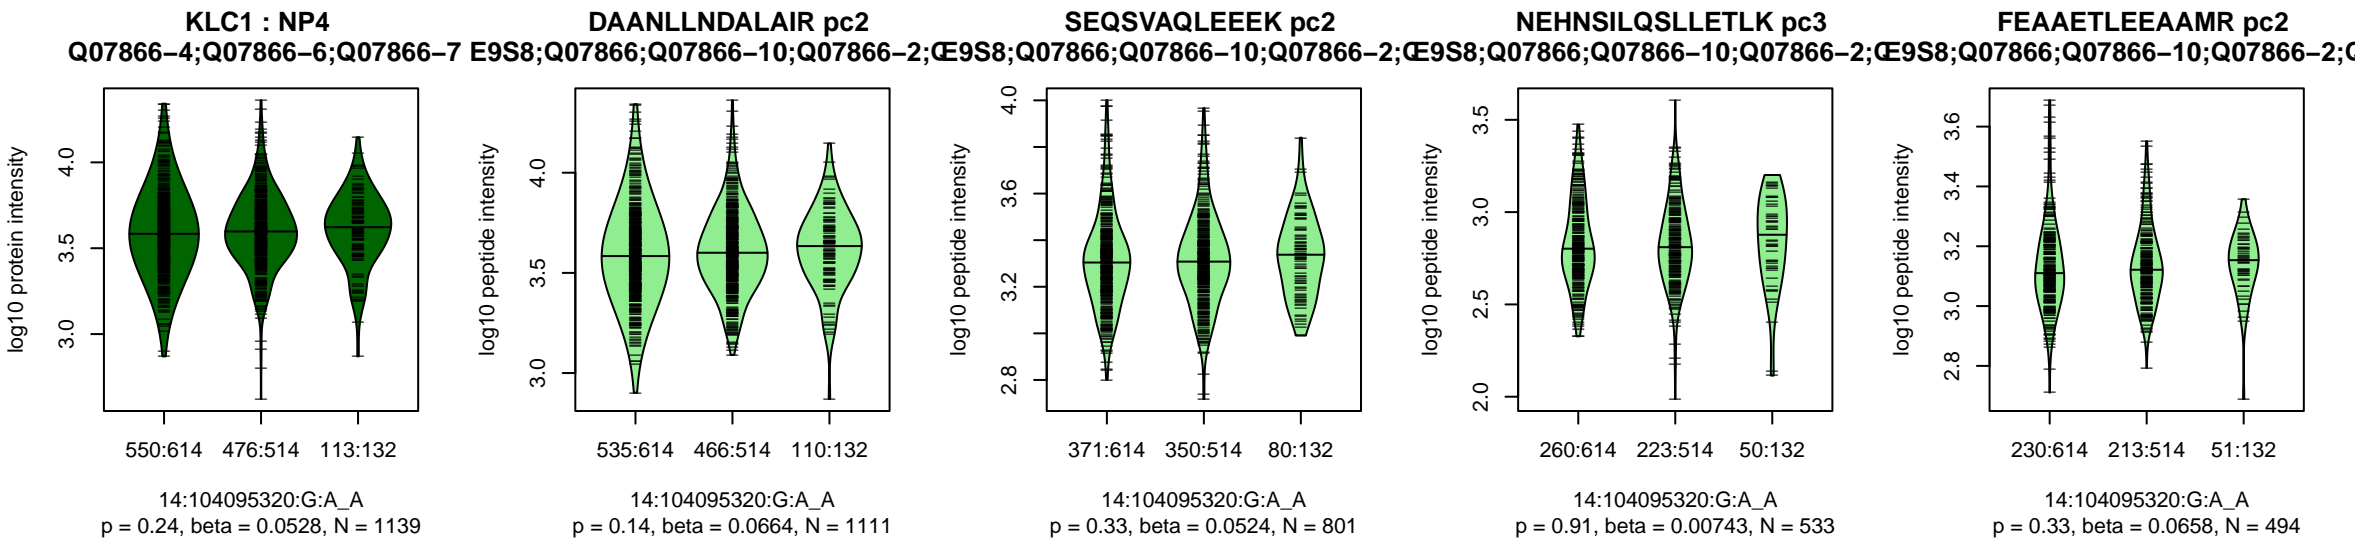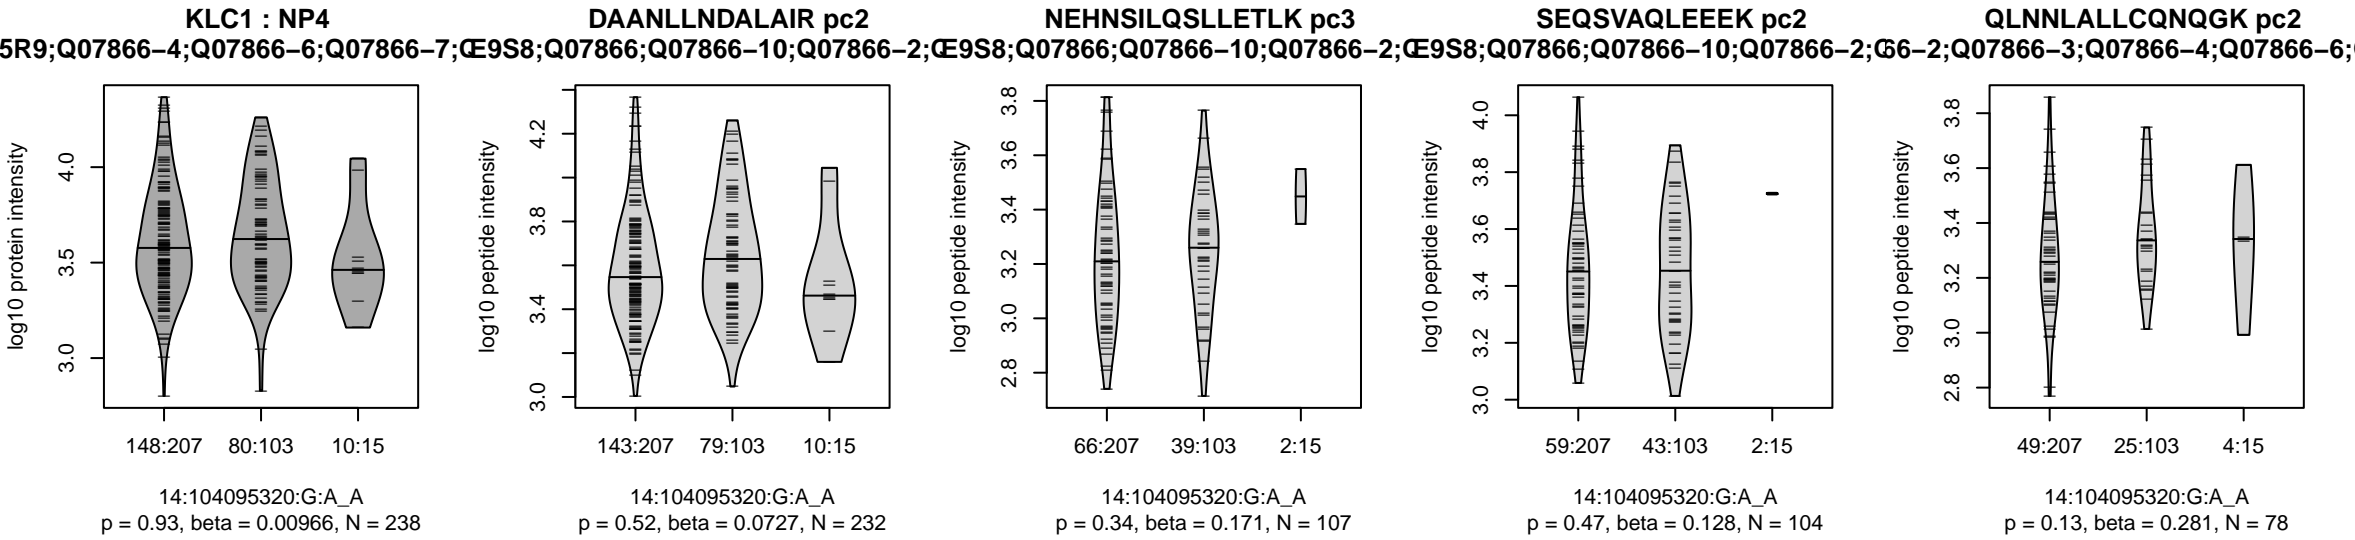

Assay Target: KLC1  
 Olink UniProt: Q07866  
 deCODE rsID: rs12884809  
 Proxy rsID: rs12884809  
 deCODE: 14:103628983:A:G  
 Proxy SNP: 14:104095320:G:A  
 deCODE log10(p): 23.9  
 deCODE BETA: 0.09  
 -----  
 1111:801:533:494:466:380:338:

**OLFML3 : NP4  
Q9NRN5**

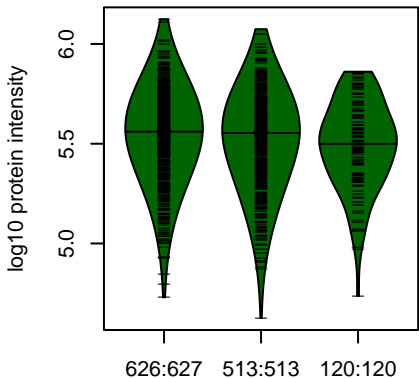

1:114489769:A:C\_A  
p = 0.017, beta = -0.102, N = 1259

**MLPLLEVAEK pc2  
B4DNG0;Q9NRN5-2;Q9NRN5**

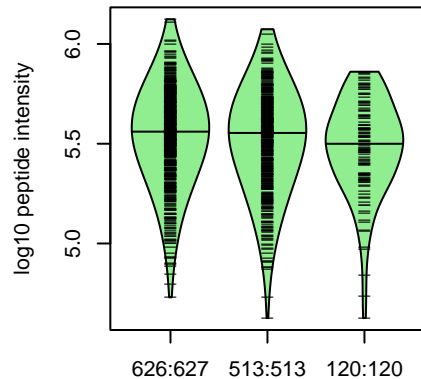

1:114489769:A:C\_A  
p = 0.015, beta = -0.104, N = 1259

**AALPYFPR pc2  
B4DNG0;Q9NRN5-2;Q9NRN5**

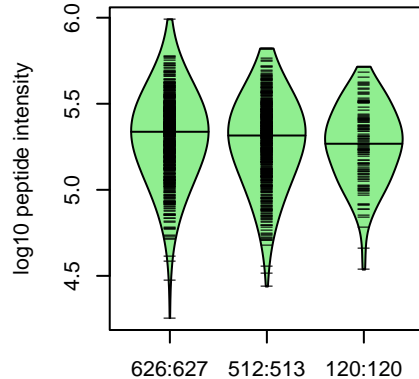

1:114489769:A:C\_A  
p = 0.036, beta = -0.0896, N = 1258

**QLYAWDDGYQIVYK pc2  
B4DNG0;Q9NRN5-2;Q9NRN5**

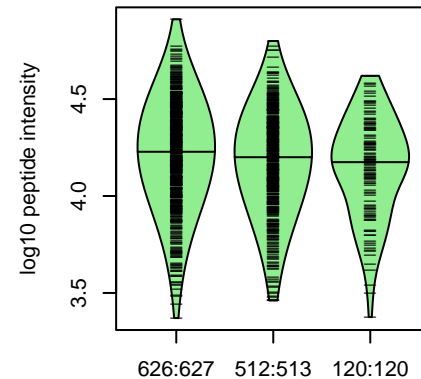

1:114489769:A:C\_A  
p = 0.00072, beta = -0.144, N = 1258

**FGGPAGLWTK pc2  
B4DNG0;Q9NRN5-2;Q9NRN5**

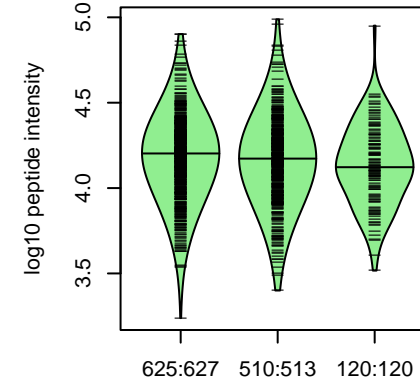

1:114489769:A:C\_A  
p = 0.042, beta = -0.087, N = 1255

**OLFML3 : NP4  
Q9NRN5**

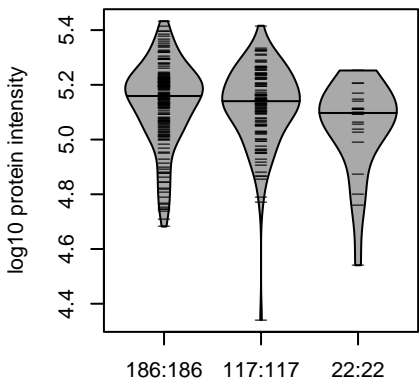

1:114489769:A:C\_A  
p = 0.21, beta = -0.11, N = 325

**AALPYFPR pc2  
B4DNG0;Q9NRN5-2;Q9NRN5**

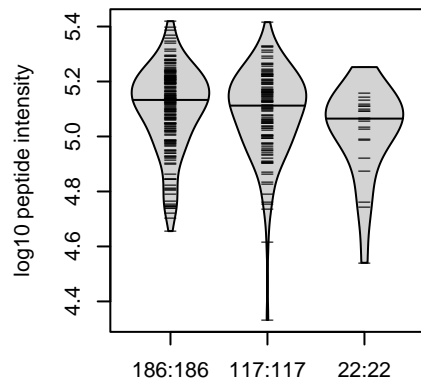

1:114489769:A:C\_A  
p = 0.22, beta = -0.108, N = 325

**FGGPAGLWTK pc2  
B4DNG0;Q9NRN5-2;Q9NRN5**

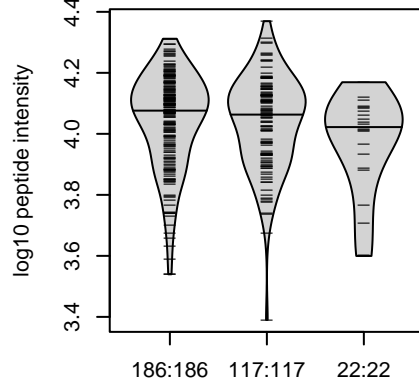

1:114489769:A:C\_A  
p = 0.2, beta = -0.113, N = 325

**MLPLLEVAEK pc2  
B4DNG0;Q9NRN5-2;Q9NRN5**

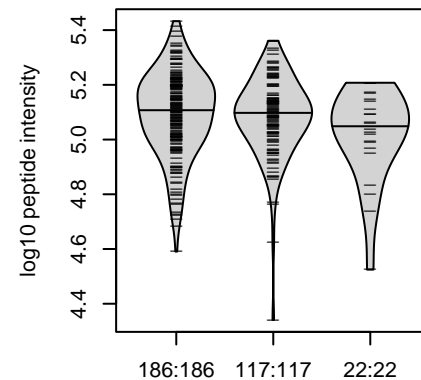

1:114489769:A:C\_A  
p = 0.22, beta = -0.109, N = 325

**QLYAWDDGYQIVYK pc2  
B4DNG0;Q9NRN5-2;Q9NRN5**

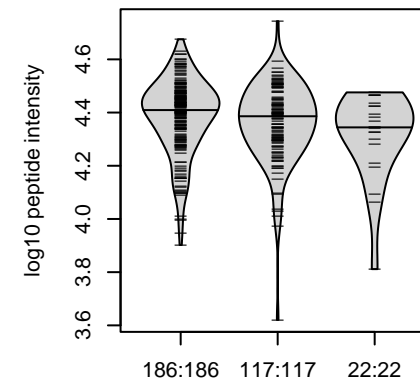

1:114489769:A:C\_A  
p = 0.098, beta = -0.146, N = 325

Assay Target: OLFML3  
Olink UniProt: Q9NRN5  
deCODE rsID: rs4381184  
Proxy rsID: rs4381184  
deCODE: 1:113947147:A:C  
Proxy SNP: 1:114489769:A:C  
deCODE log10(p): 23.9  
deCODE BETA: -0.09  
-----\*-----  
1259:1258:1258:1255:1254:125



**GAS1 : NP2  
P54826**

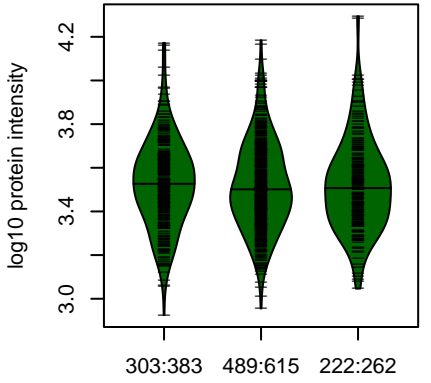

9:89687854:C:T\_C  
 $p = 0.46$ ,  $\beta = -0.0323$ ,  $N = 1014$

**TVIEDMLAMPK pc2  
P54826**

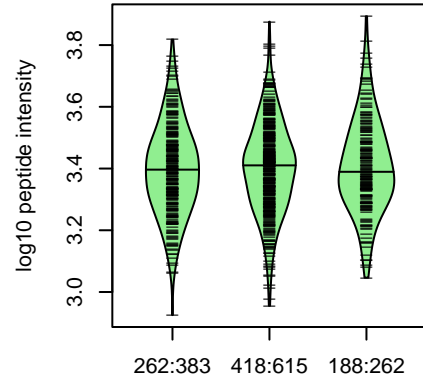

9:89687854:C:T\_C  
 $p = 0.54$ ,  $\beta = 0.0289$ ,  $N = 868$

**GDLPYGPR pc2  
P54826**

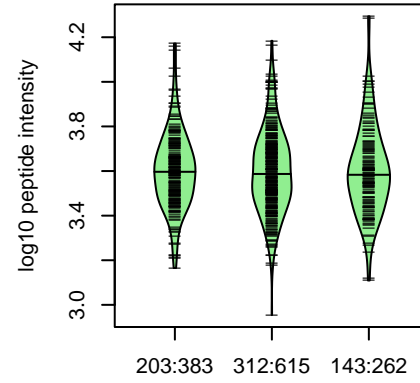

9:89687854:C:T\_C  
 $p = 0.65$ ,  $\beta = -0.0248$ ,  $N = 658$

Assay Target: GAS1  
Olink UniProt: P54826  
deCODE rsID: rs4878043  
Proxy rsID: rs4878043  
deCODE: 9:87072939:C:T  
Proxy SNP: 9:89687854:C:T  
deCODE  $\log_{10}(p)$ : 23.1  
deCODE BETA: -0.08  
-:-  
868:658



**SERPINB1 : NP1  
P30740**

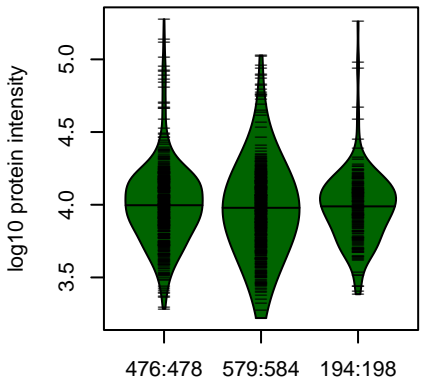

6:2835831:A:G\_A  
p = 0.27, beta = -0.0448, N = 1249

**LVLVNAIFYK pc2  
0GU38;O75830;P50452-2;P30740;P50**

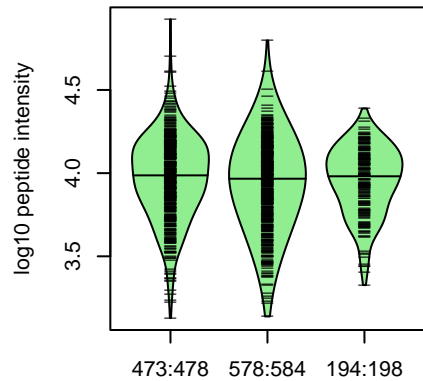

6:2835831:A:G\_A  
p = 0.12, beta = -0.063, N = 1245

**FAYGYIEDLK pc2  
P30740**

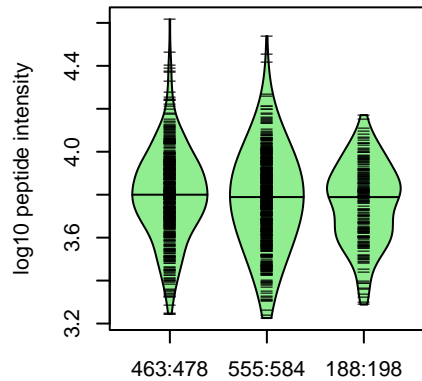

6:2835831:A:G\_A  
p = 0.027, beta = -0.0906, N = 1206

**TYNFLPEFLVSTQK pc2  
P30740**

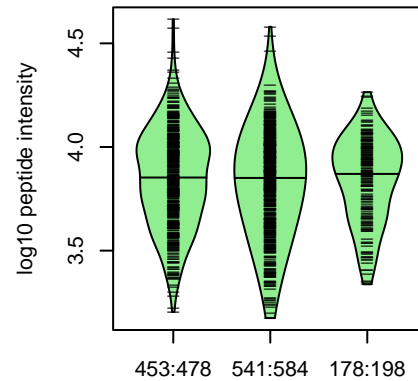

6:2835831:A:G\_A  
p = 0.44, beta = -0.0326, N = 1172

**LHEWTKPENLDFIEVNVSLPR pc4  
P30740**

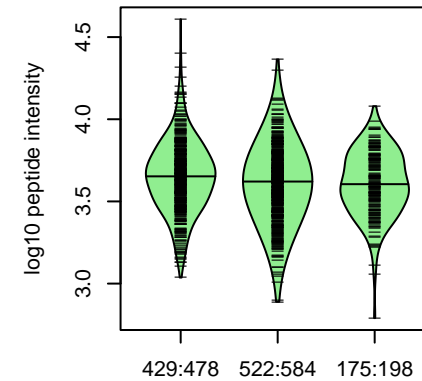

6:2835831:A:G\_A  
p = 0.01, beta = -0.109, N = 1126

**SERPINB1 : NP1  
P30740**

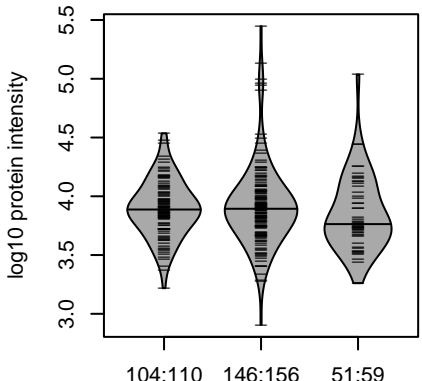

6:2835831:A:G\_A  
p = 0.3, beta = -0.0851, N = 301

**FAYGYIEDLK pc2  
P30740**

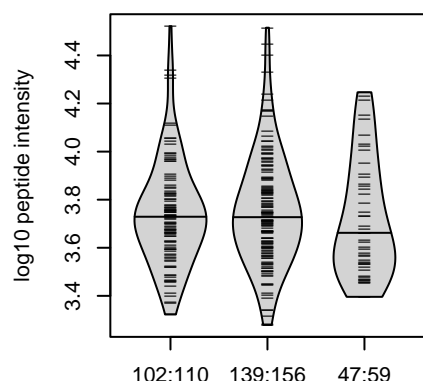

6:2835831:A:G\_A  
p = 0.64, beta = -0.0391, N = 288

**LVLVNAIFYK pc2  
0GU38;O75830;P50452-2;P30740;P50**

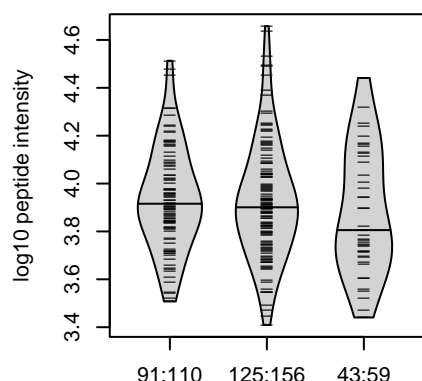

6:2835831:A:G\_A  
p = 0.18, beta = -0.118, N = 259

**LHEWTKPENLDFIEVNVSLPR pc4  
P30740**

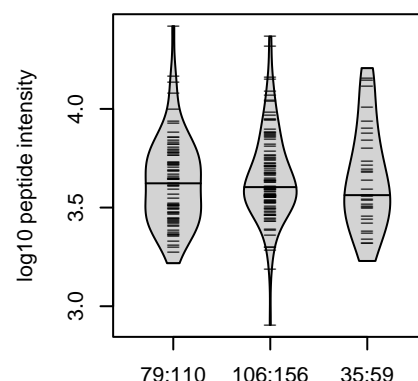

6:2835831:A:G\_A  
p = 0.48, beta = 0.068, N = 220

**EATTNAPFR pc2  
P30740**

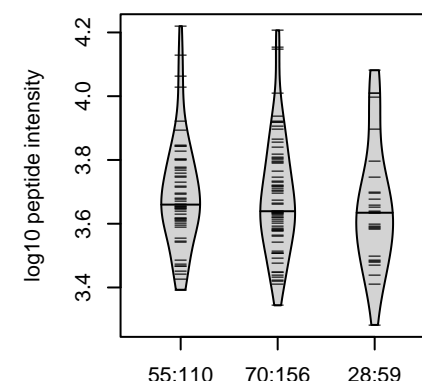

6:2835831:A:G\_A  
p = 0.24, beta = -0.13, N = 153

Assay Target: SERPINB1  
Olink UniProt: P30740  
deCODE rsID: rs2293772  
Proxy rsID: rs2293772  
deCODE: 6:2835597:A:G  
Proxy SNP: 6:2835831:A:G  
deCODE log10(p): 21.2  
deCODE BETA: -0.08  
-----  
1245:1206:1172:1126:892:822:7

**IL7R : NP2  
P16871**

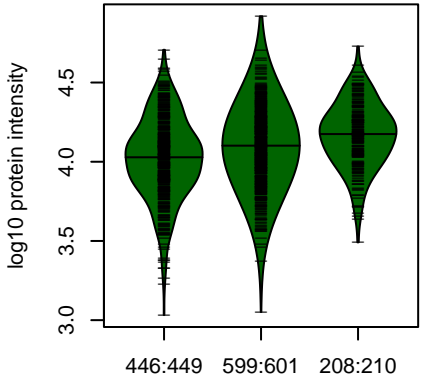

5:35866218:A:G\_G  
p = 2.1e-14, beta = 0.305, N = 1253

**LQEIFYETK pc2  
B8YG18;D6RDM4;P16871;P16871-**

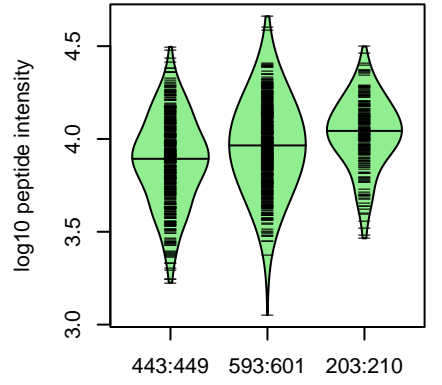

5:35866218:A:G\_G  
p = 1.8e-17, beta = 0.341, N = 1239

**VLMHDVAYR pc2  
B8YG18;P16871;P16871-3**

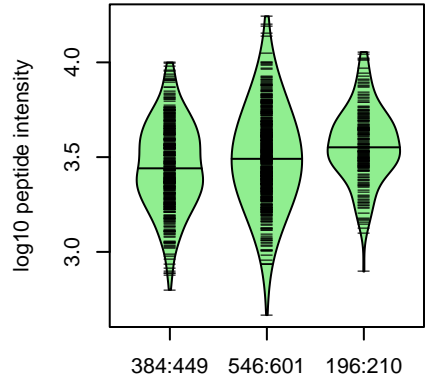

5:35866218:A:G\_G  
p = 7.5e-09, beta = 0.244, N = 1126

**LQPAAMYEIK pc2  
P16871;P16871-3**

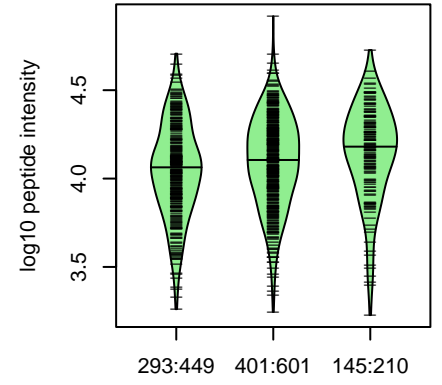

5:35866218:A:G\_G  
p = 4e-05, beta = 0.2, N = 839

**SIPDHYFK pc2  
P16871;P16871-3**

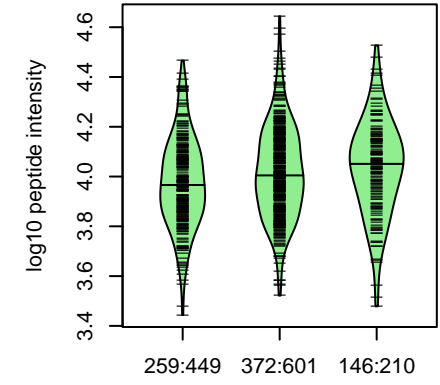

5:35866218:A:G\_G  
p = 0.00034, beta = 0.18, N = 777

**IL7R : NP2  
P16871-3**

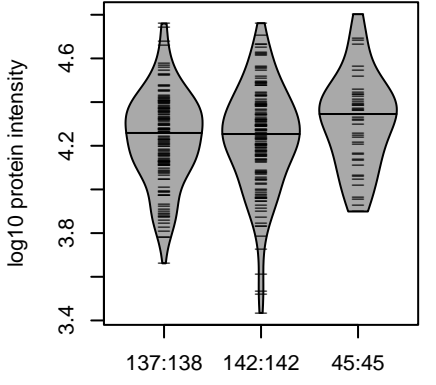

5:35866218:A:G\_G  
p = 0.61, beta = 0.04, N = 324

**LQEIFYETK pc2  
B8YG18;D6RDM4;P16871;P16871-**

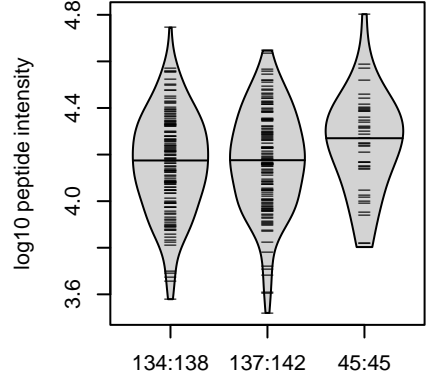

5:35866218:A:G\_G  
p = 0.45, beta = 0.0597, N = 316

**LQPAAMYEIK pc2  
P16871;P16871-3**

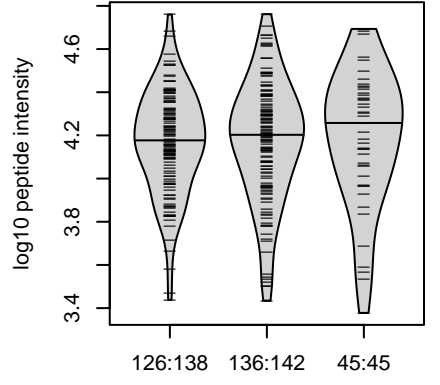

5:35866218:A:G\_G  
p = 1, beta = 0.000343, N = 307

**VLMHDVAYR pc2  
B8YG18;P16871;P16871-3**

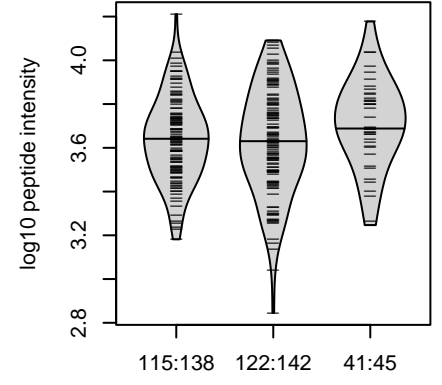

5:35866218:A:G\_G  
p = 0.65, beta = 0.0389, N = 278

Assay Target: IL7R  
Olink UniProt: P16871  
deCODE rsID: rs10058572  
Proxy rsID: rs6451229  
deCODE: 5:35880754:!:TTTTTC  
Proxy SNP: 5:35866218:A:G  
deCODE log10(p): 20.9  
deCODE BETA: 0.08  
\*.\*.\*.\*.-:-  
1239:1126:839:777:84:38

**GLRX3 : NP5  
O76003**

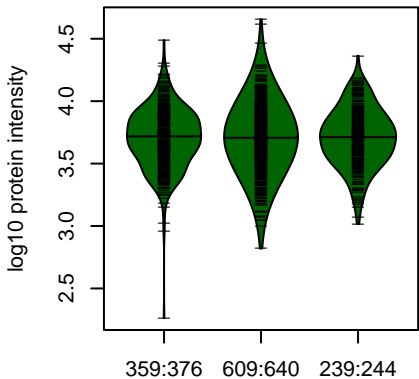

10:131945252:T:C\_C  
p = 0.67, beta = 0.0174, N = 1207

**YEISSVPTFLFFK pc2  
O76003**

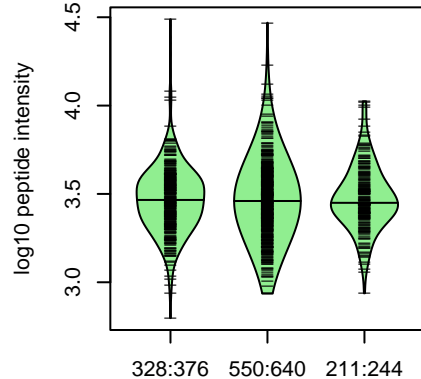

10:131945252:T:C\_C  
p = 0.68, beta = 0.0178, N = 1089

**GELVGGLDIVK pc2  
O76003**

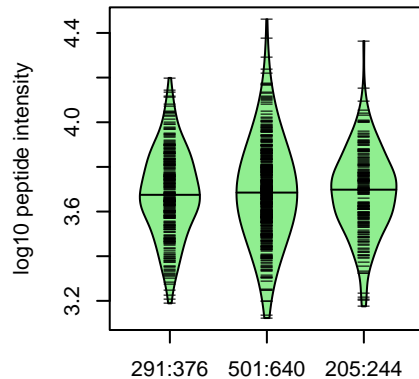

10:131945252:T:C\_C  
p = 0.7, beta = 0.0172, N = 997

**ELPQVSFVK pc2  
O76003**

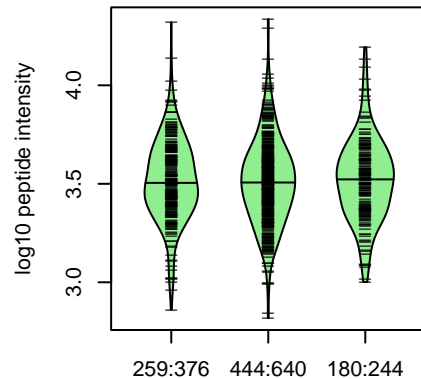

10:131945252:T:C\_C  
p = 0.91, beta = 0.00547, N = 883

**ENGELLPILR pc2  
O76003**

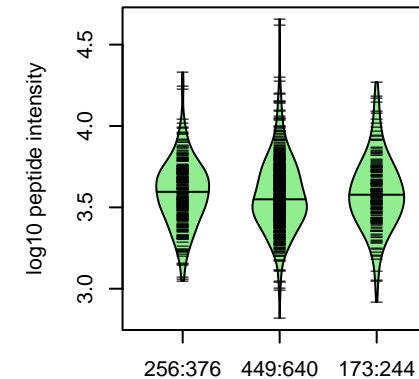

10:131945252:T:C\_C  
p = 0.84, beta = -0.00963, N = 878

**GLRX3 : NP5  
O76003**

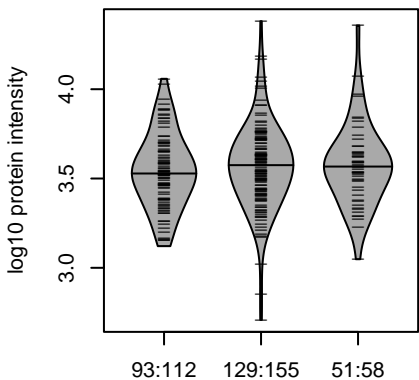

10:131945252:T:C\_C  
p = 0.35, beta = 0.0782, N = 273

**GELVGGLDIVK pc2  
O76003**

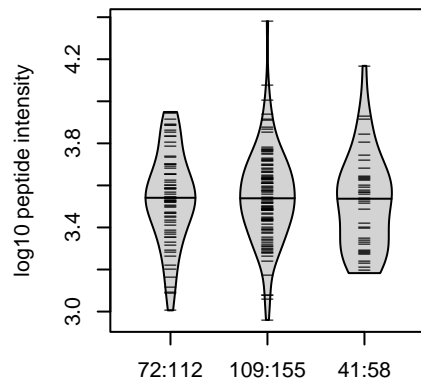

10:131945252:T:C\_C  
p = 0.51, beta = -0.0621, N = 222

**YEISSVPTFLFFK pc2  
O76003**

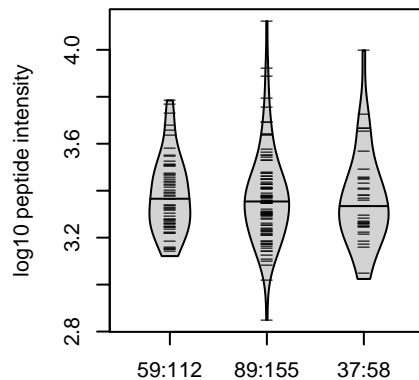

10:131945252:T:C\_C  
p = 0.47, beta = -0.0734, N = 185

**ENGELLPILR pc2  
O76003**

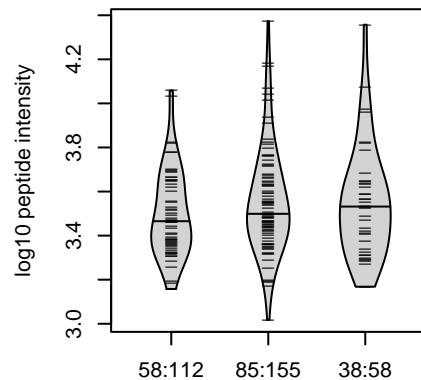

10:131945252:T:C\_C  
p = 0.28, beta = 0.109, N = 181

**LEAEGVPEVSEK pc2  
O76003**

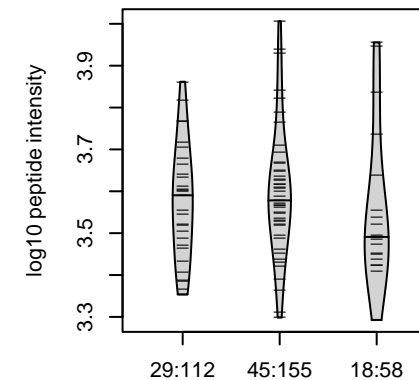

10:131945252:T:C\_C  
p = 0.28, beta = -0.154, N = 92

**HASSGSFLSSANEHLK pc3  
rs2274217 ALT**

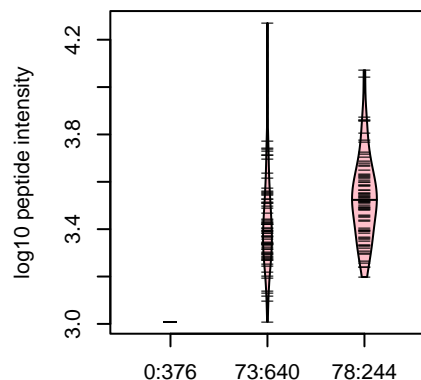

10:131945252:T:C\_C  
p = 1.1e-25, model = REC, N = 151

**HASSGSFLPSANEHLK pc3  
rs2274217 REF**

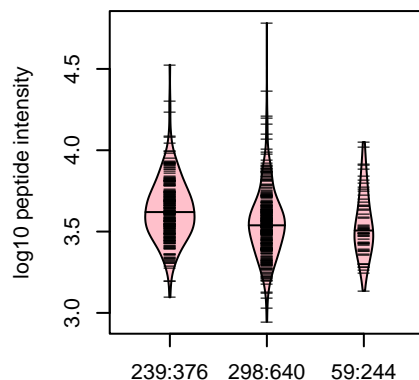

10:131945252:T:C\_C  
p = 2.6e-16, model = DOM, N = 596

Assay Target: GLRX3  
Olink UniProt: O76003  
deCODE rsID: rs12248841  
Proxy rsID: rs12248841  
deCODE: 10:130146988:C:T  
Proxy SNP: 10:131945252:T:C  
deCODE log10(p): 20.9  
deCODE BETA: -0.08  
-----  
1089:997:883:878:419:338:301:

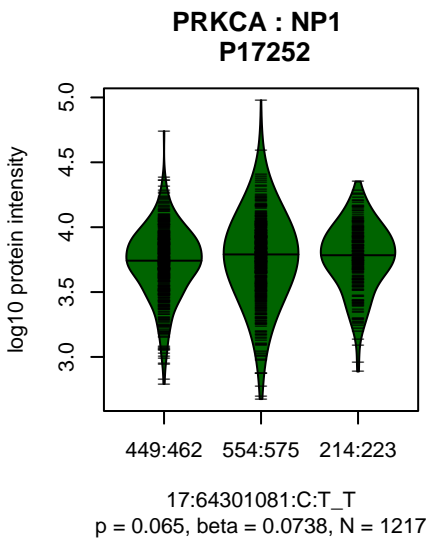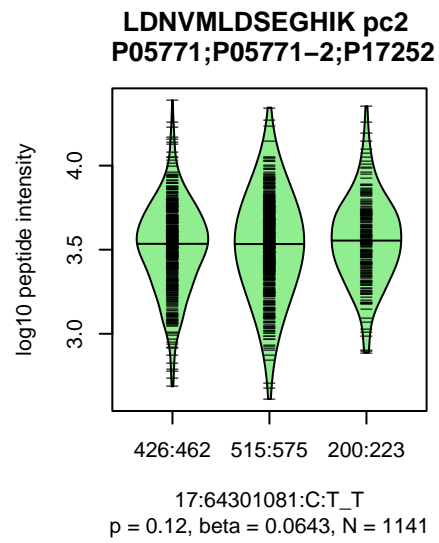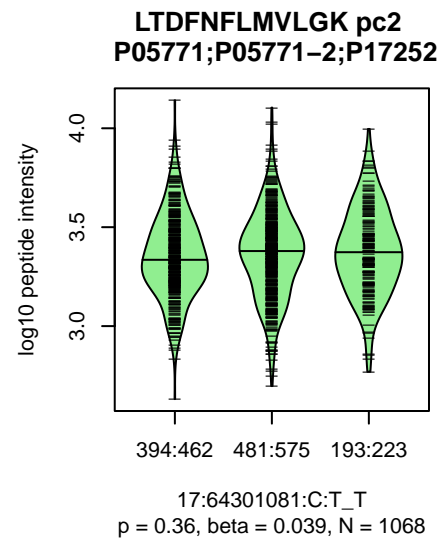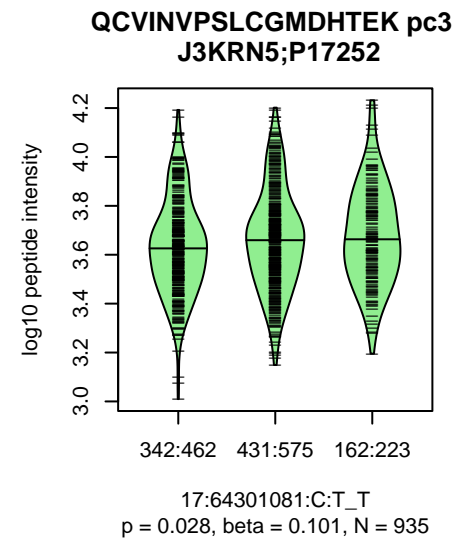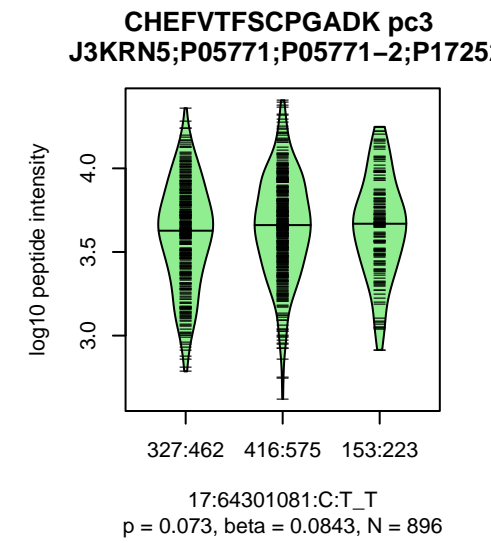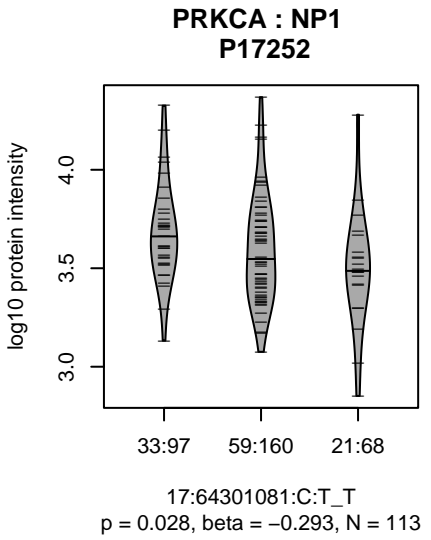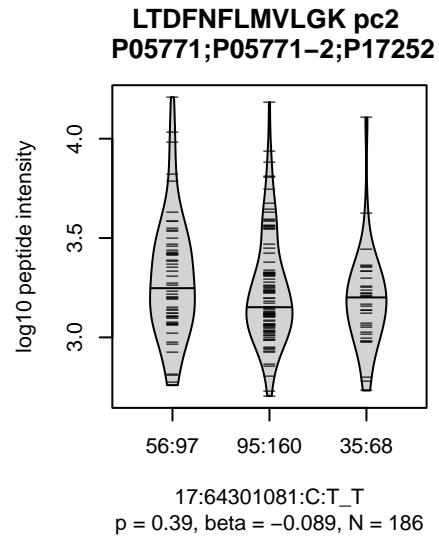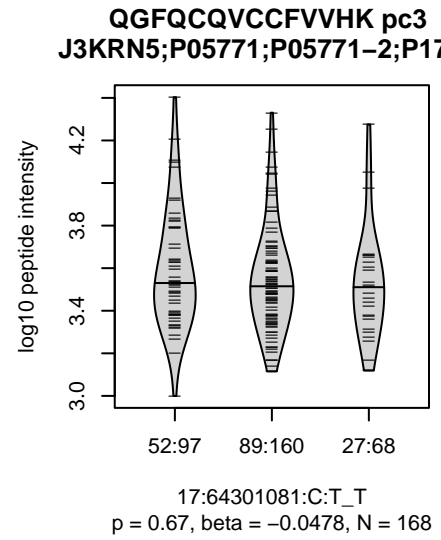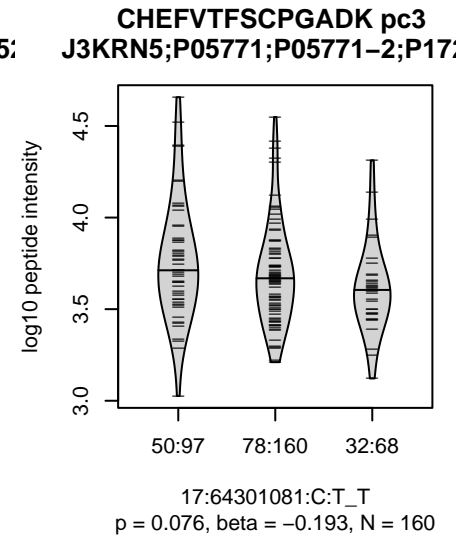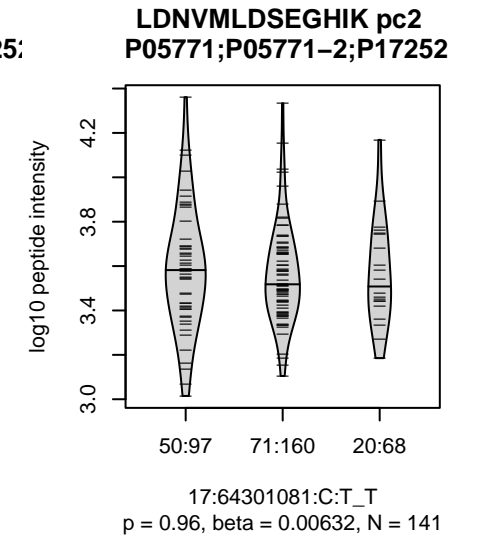

Assay Target: PRKCA  
 Olink UniProt: P17252  
 deCODE rsID: rs61762372  
 Proxy rsID: rs67700546  
 deCODE: 17:66302564:A:G  
 Proxy SNP: 17:64301081:C:T  
 deCODE log10(p): 20.8  
 deCODE BETA: 0.08  
 -----  
 1141:1068:935:896:812:791:766

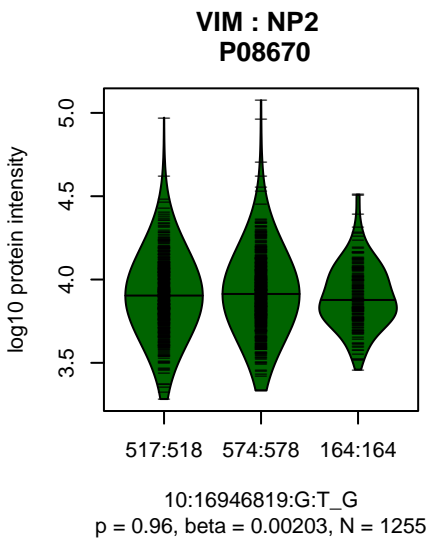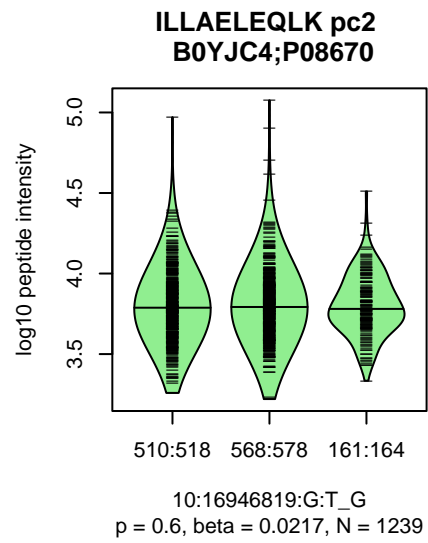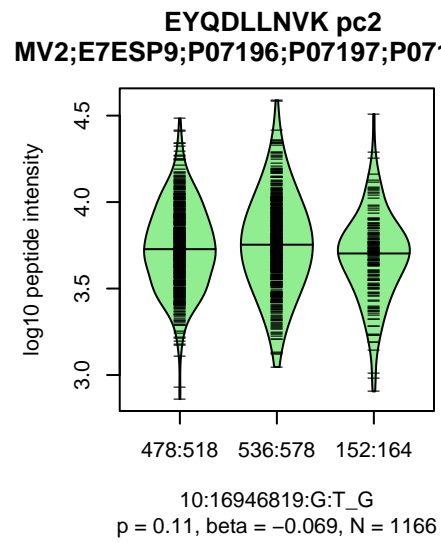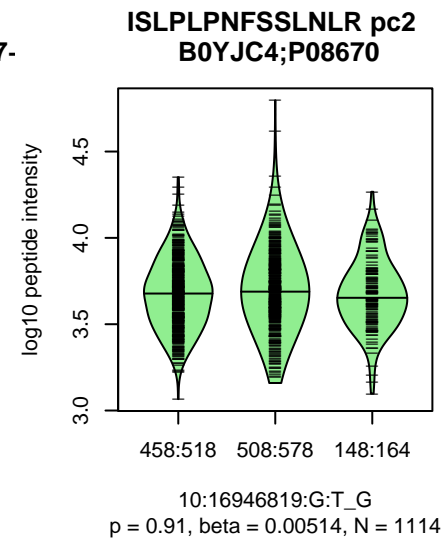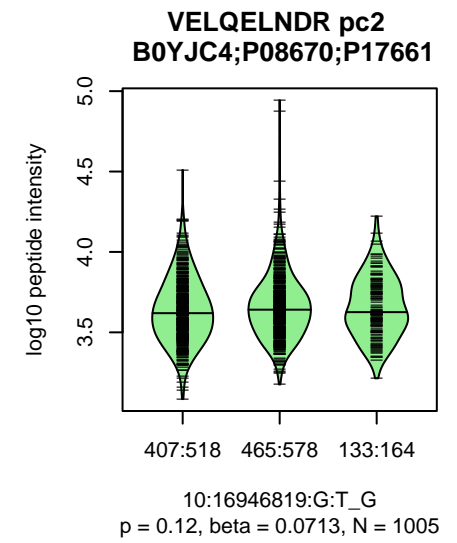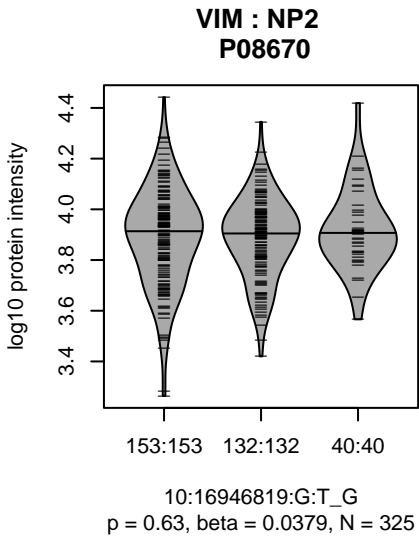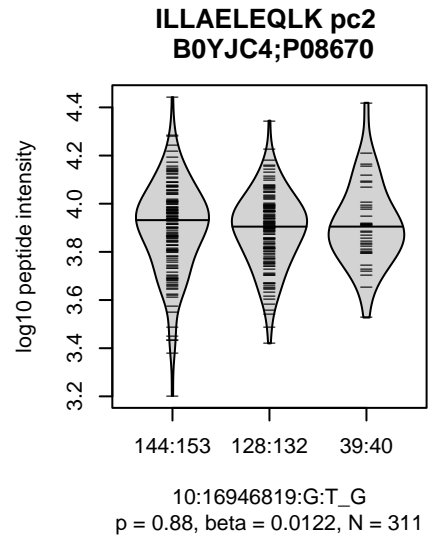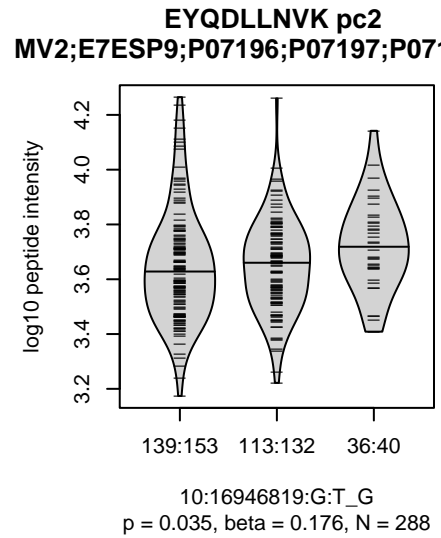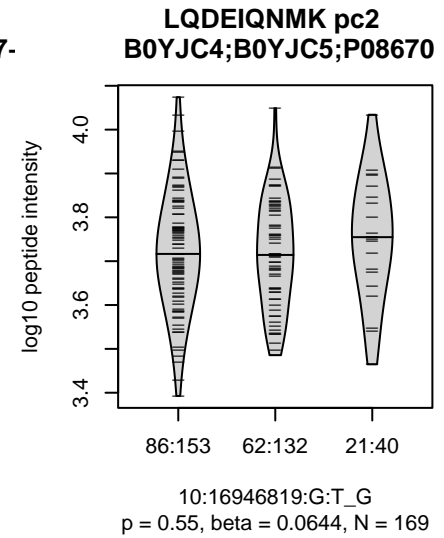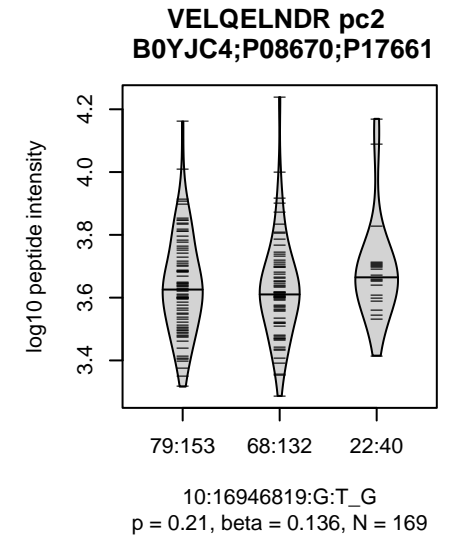

**FLEQQNK pc2  
rs7959052;rs11608915;rs1613931 ALT**

Assay Target: VIM  
Olink UniProt: P08670  
deCODE rsID: rs796667  
Proxy rsID: rs796667  
deCODE: 10:16904820:G:T  
Proxy SNP: 10:16946819:G:T  
deCODE log10(p): 20.5  
deCODE BETA: 0.08  
-----  
1239:1166:1114:1005:910:877:8

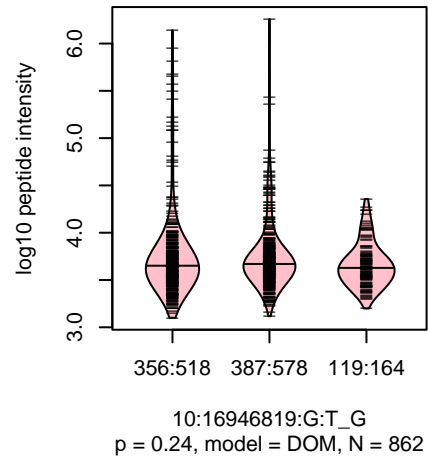

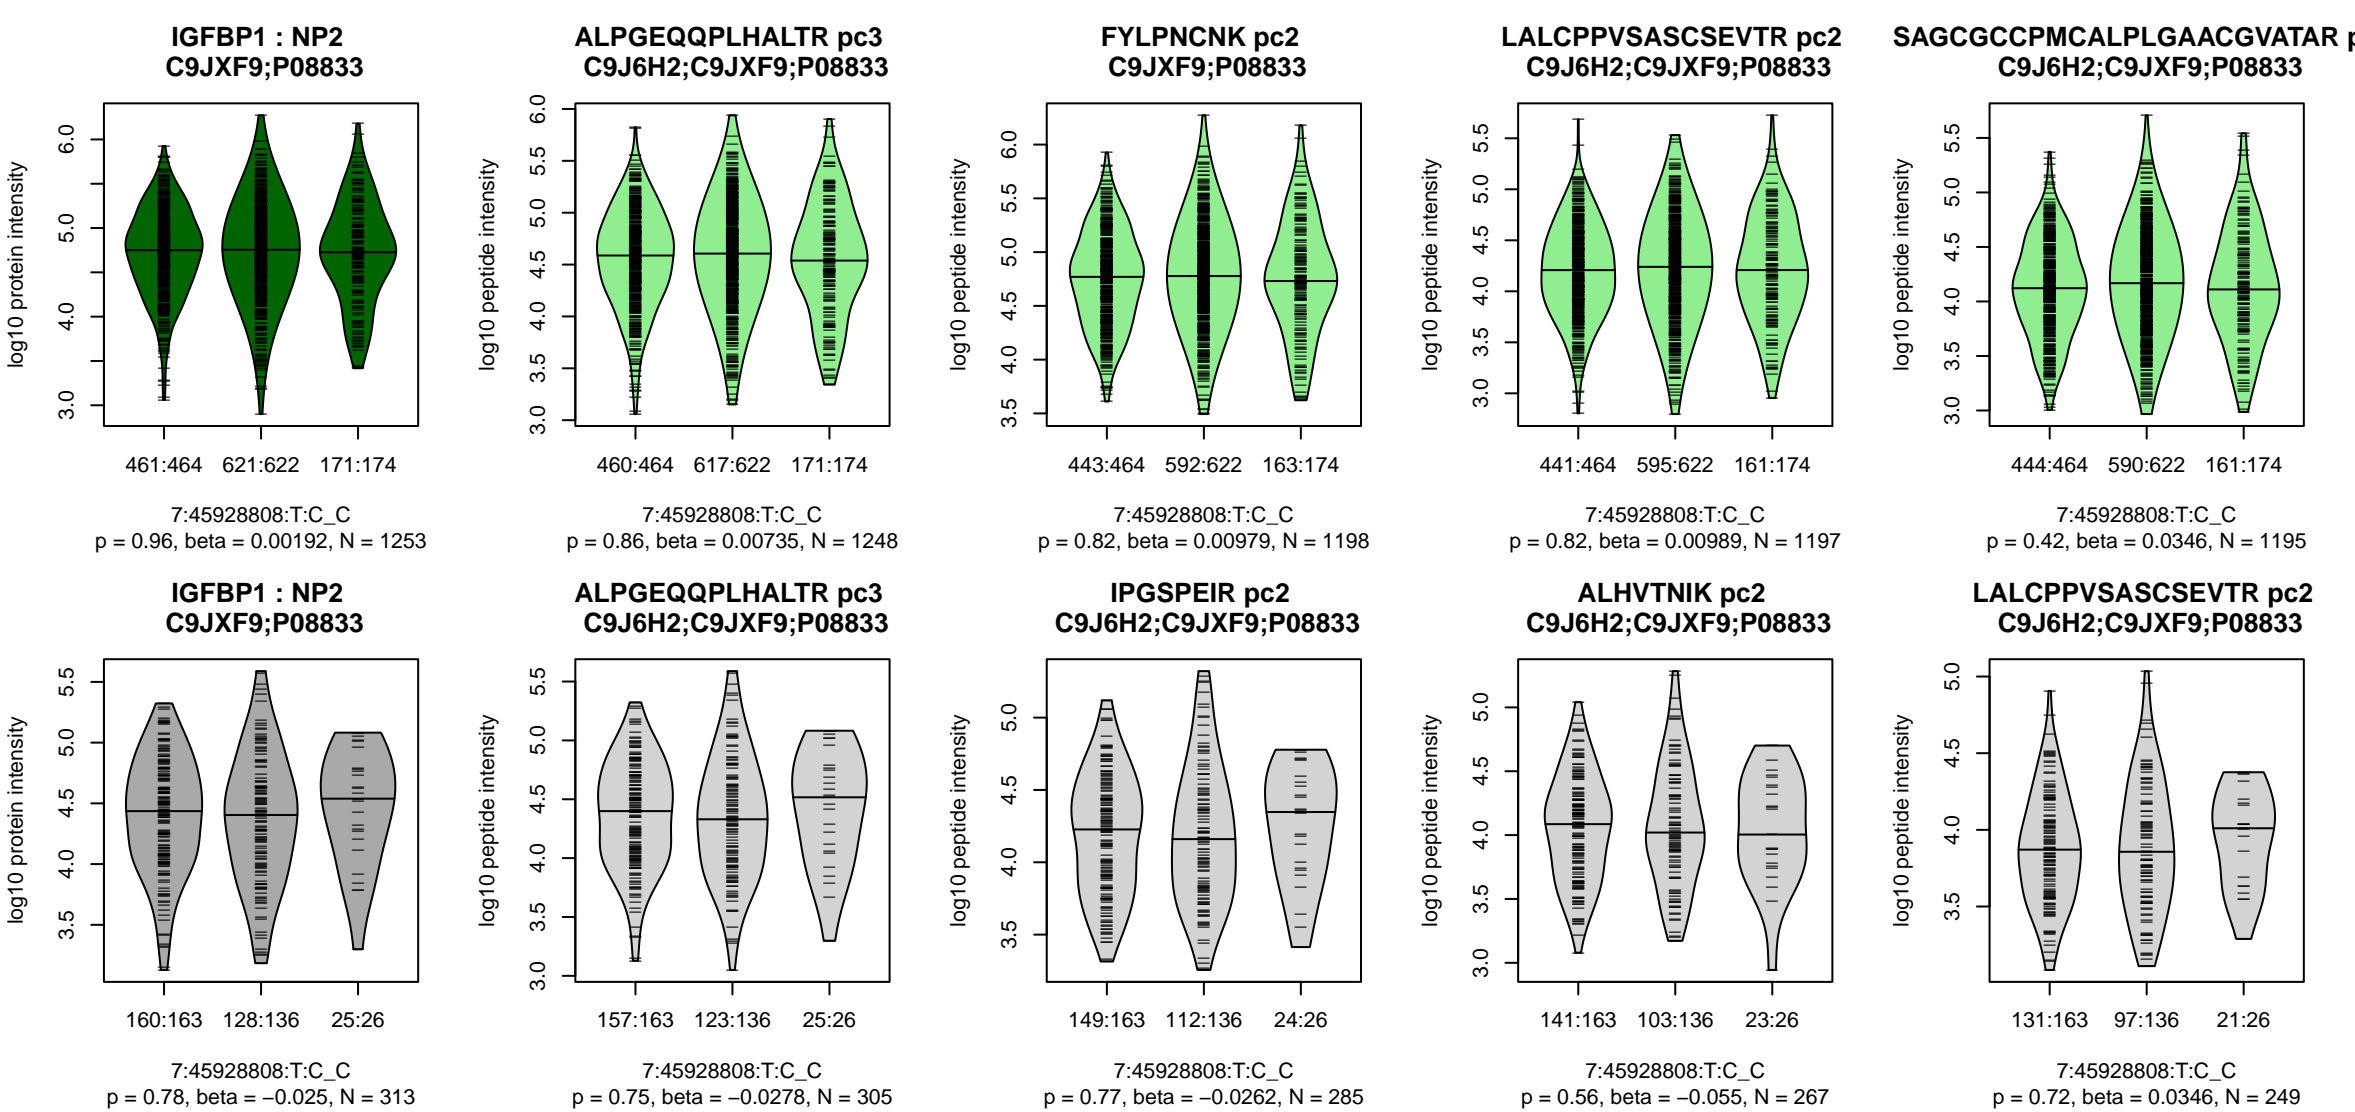

Assay Target: IGFBP1  
 Olink UniProt: P08833  
 deCODE rsID: rs3828998  
 Proxy rsID: rs3828998  
 deCODE 7:45889209:C:T  
 Proxy SNP: 7:45928808:T:C  
 deCODE log10(p): 20.4  
 deCODE BETA: -0.08  
 -----  
 1248:1206:1198:1197:1195:119

**CAMP : NP1**  
**J3KNB4;P49913**

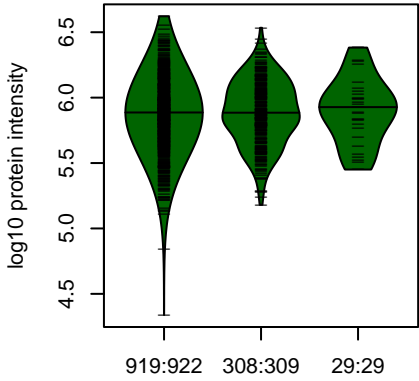

3:47346717:G:A\_A  
p = 0.52, beta = 0.0356, N = 1256

**GSFDISCDK pc2**  
**J3KNB4;P49913**

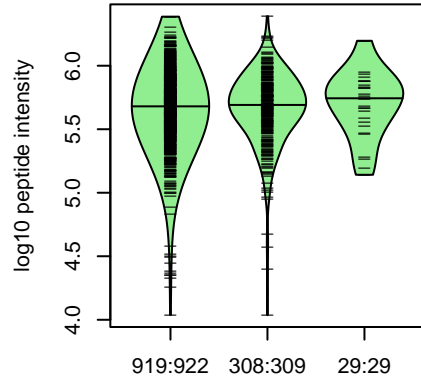

3:47346717:G:A\_A  
p = 0.73, beta = 0.0196, N = 1256

**FALLGDFFR pc2**  
**J3KNB4;P49913**

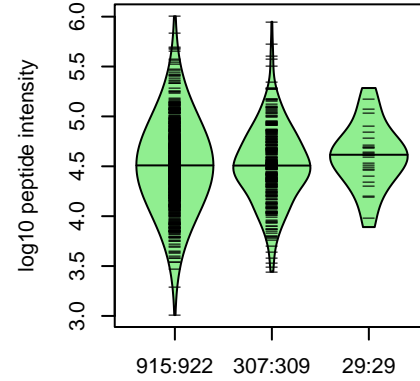

3:47346717:G:A\_A  
p = 0.66, beta = 0.025, N = 1251

**FALLGDFFRK pc3**  
**J3KNB4;P49913**

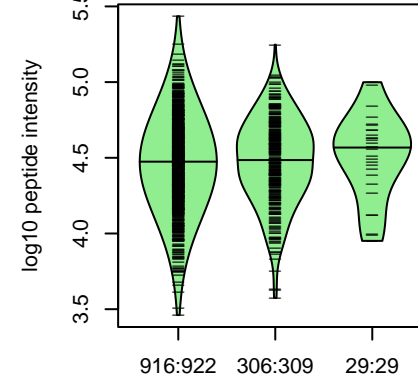

3:47346717:G:A\_A  
p = 0.33, beta = 0.0547, N = 1251

**TTQQSPEDCDFK pc3**  
**J3KNB4;P49913**

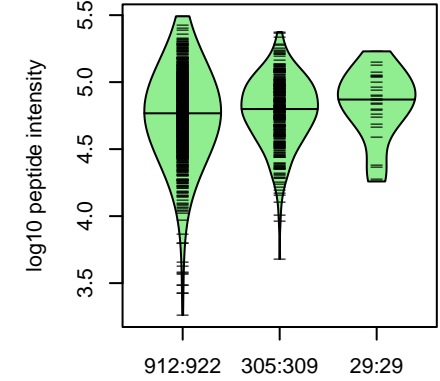

3:47346717:G:A\_A  
p = 0.08, beta = 0.0983, N = 1246

**CAMP : NP1**  
**J3KNB4;P49913**

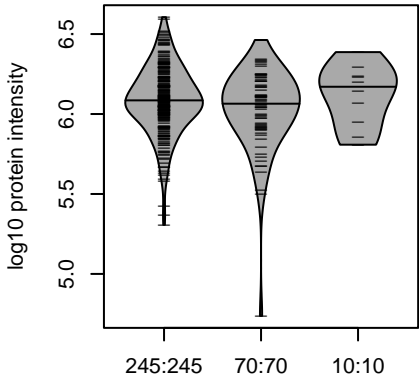

3:47346717:G:A\_A  
p = 0.76, beta = -0.0332, N = 325

**FALLGDFFRK pc3**  
**J3KNB4;P49913**

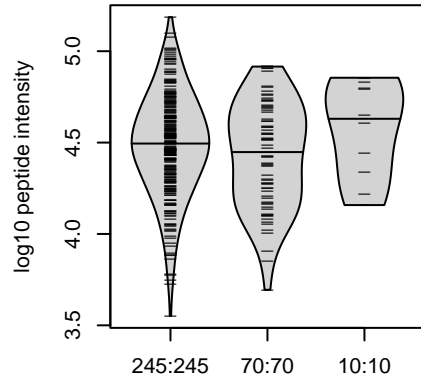

3:47346717:G:A\_A  
p = 0.77, beta = 0.0312, N = 325

**FALLGDFFR pc2**  
**J3KNB4;P49913**

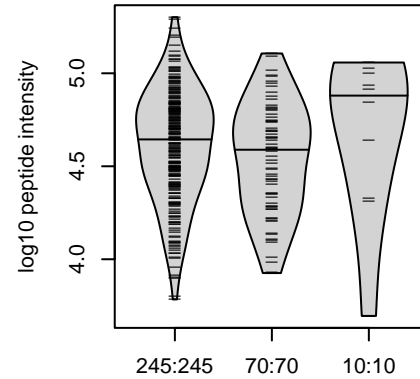

3:47346717:G:A\_A  
p = 0.74, beta = 0.0355, N = 325

**TTQQSPEDCDFK pc3**  
**J3KNB4;P49913**

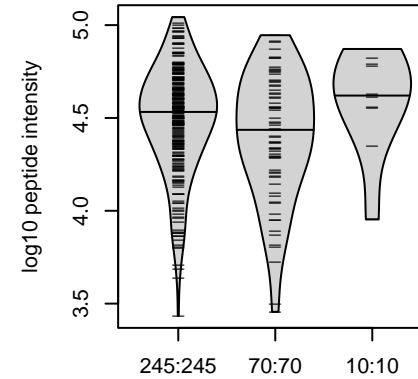

3:47346717:G:A\_A  
p = 0.94, beta = -0.00872, N = 325

**AIDGINQR pc2**  
**J3KNB4;P49913**

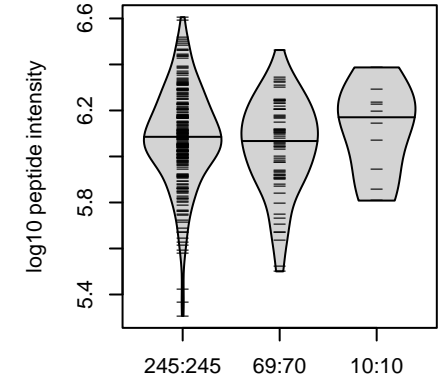

3:47346717:G:A\_A  
p = 0.94, beta = -0.00801, N = 324

Assay Target: CAMP  
Olink UniProt: P49913  
deCODE rsID: rs55771110  
Proxy rsID: rs55771110  
deCODE: 3:47305227:A:G  
Proxy SNP: 3:47346717:G:A  
deCODE log10(p): 20.3  
deCODE BETA: 0.11  
-----NA  
1256:1251:1251:1246:1245:124

**RPE : NP2  
Q96AT9**

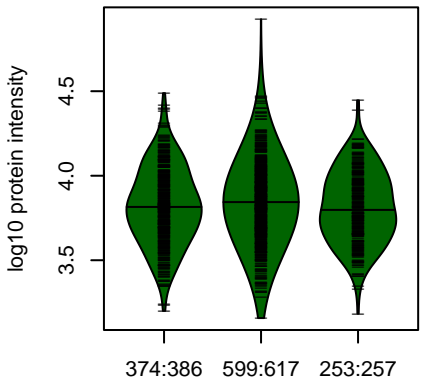

2:210880492:G:A\_A  
p = 0.79, beta = -0.0105, N = 1226

**TQFPSLDIEVDGGVGPDTVHK pc3  
9IZU8;C9J8S0;C9J9T0;Q96AT9;Q96AT8S0;C9J9T0;Q2QD12;Q96AT9;Q96AT9D12;Q96AT9;Q96AT9-3;Q96AT9-4;Q96AT9**

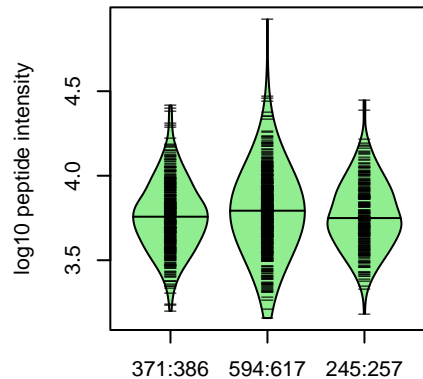

2:210880492:G:A\_A  
p = 0.94, beta = 0.003, N = 1210

**FMEDMMPK pc2**

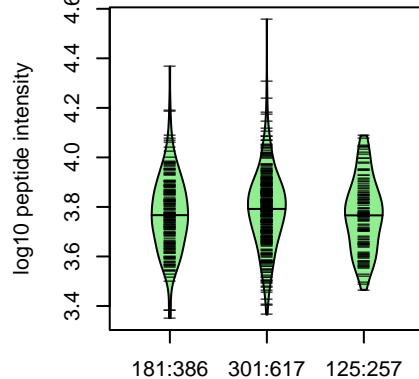

2:210880492:G:A\_A  
p = 0.46, beta = -0.0426, N = 607

**SVINLLR pc2**

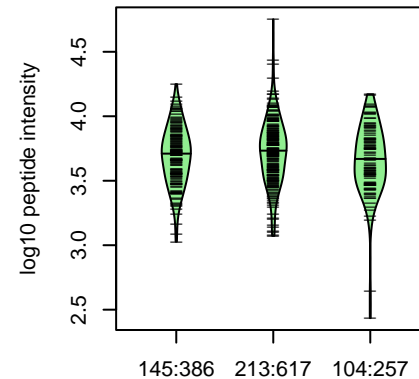

2:210880492:G:A\_A  
p = 0.54, beta = -0.0391, N = 462

**NVCSEAAQK pc2**

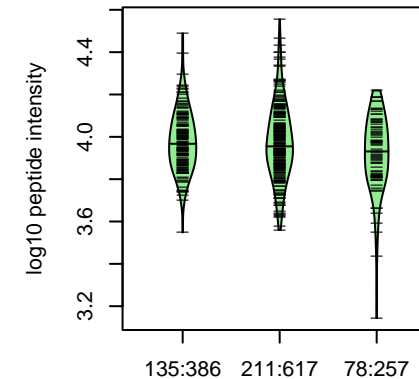

2:210880492:G:A\_A  
p = 0.038, beta = -0.143, N = 424

**RPE : NP2  
Q96AT9**

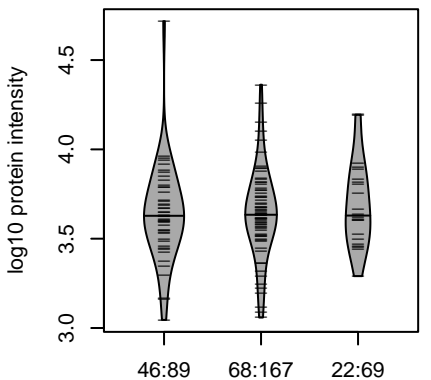

2:210880492:G:A\_G  
p = 0.41, beta = 0.101, N = 136

**SVINLLR pc2**

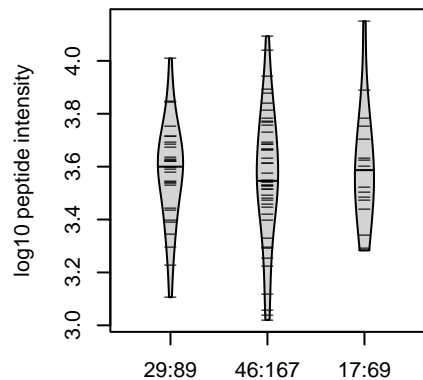

2:210880492:G:A\_G  
p = 0.66, beta = -0.0646, N = 92

**TQFPSLDIEVDGGVGPDTVHK pc3 QLGQDPFFDMHMMVSKPEQWVK pc3**

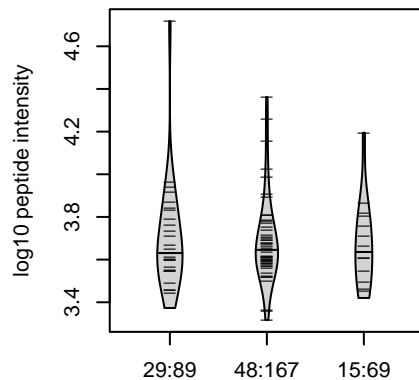

2:210880492:G:A\_G  
p = 0.74, beta = -0.0503, N = 92

**IGPSILNSDLANLGAECLR pc3**

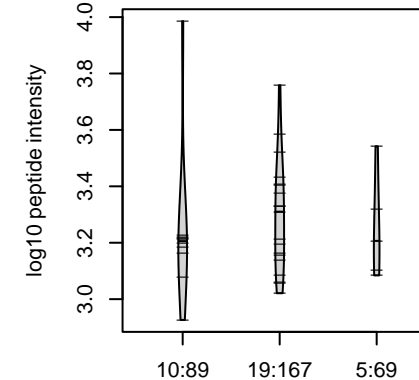

2:210880492:G:A\_G  
p = 0.3, beta = -0.255, N = 34

Assay Target: RPE  
Olink UniProt: Q96AT9  
deCODE rsID: rs2723211  
Proxy rsID: rs2723211  
deCODE: 2:210015768:A:G  
Proxy SNP: 2:210880492:G:A  
deCODE log10(p): 20.1  
deCODE BETA: 0.08  
-:-:-:-:-NA  
1210:607:462:424:353:269:116:



**FBLN5 : NP5**  
**G3V4U0;Q9UBX5**

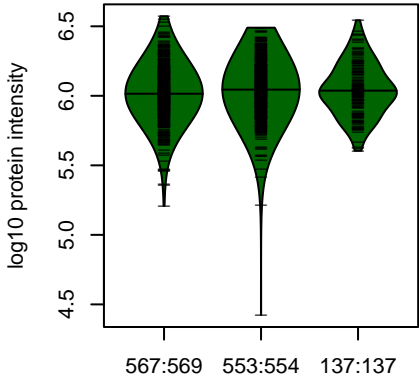

14:92348975:A:G\_A  
p = 0.09, beta = 0.0714, N = 1257

**CMCPAENPGCR pc2**  
**G3V4U0;G3XA98;Q9UBX5**

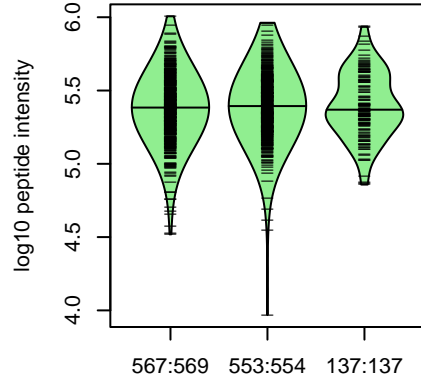

14:92348975:A:G\_A  
p = 0.25, beta = 0.0487, N = 1257

**DQPFTILYR pc2**  
**G3V4U0;G3XA98;Q9UBX5**

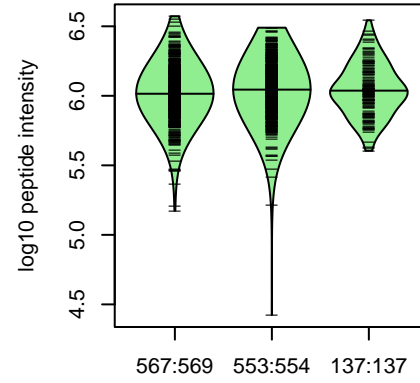

14:92348975:A:G\_A  
p = 0.09, beta = 0.0715, N = 1257

**YPGAYYIFQIK pc2**  
**G3V4U0;G3XA98;Q9UBX5**

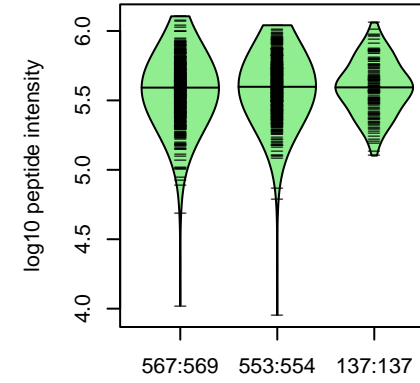

14:92348975:A:G\_A  
p = 0.19, beta = 0.0555, N = 1257

**SVPADIFQMATTTR pc2**  
**G3V4U0;G3XA98;Q9UBX5**

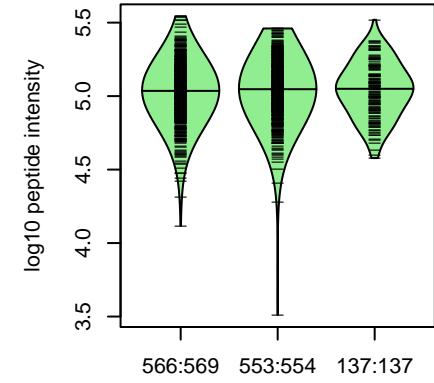

14:92348975:A:G\_A  
p = 0.28, beta = 0.0454, N = 1256

**FBLN5 : NP5**  
**G3V4U0;Q9UBX5**

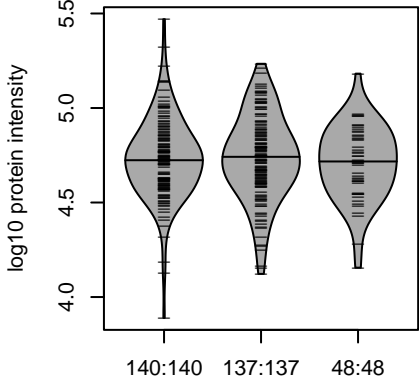

14:92348975:A:G\_A  
p = 0.62, beta = -0.0389, N = 325

**DQPFTILYR pc2**  
**G3V4U0;G3XA98;Q9UBX5**

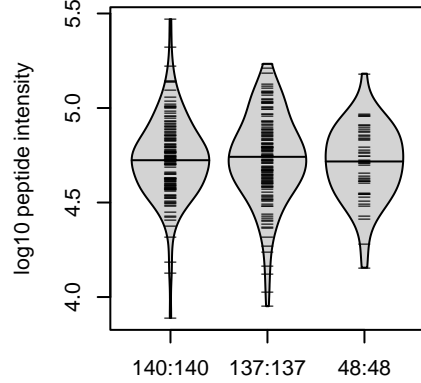

14:92348975:A:G\_A  
p = 0.61, beta = -0.0394, N = 325

**QSGQCLDIDECR pc2**  
**G3V4U0;Q9UBX5**

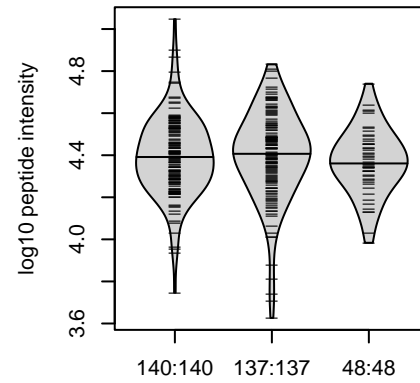

14:92348975:A:G\_A  
p = 0.57, beta = -0.0436, N = 325

**YPGAYYIFQIK pc2**  
**G3V4U0;G3XA98;Q9UBX5**

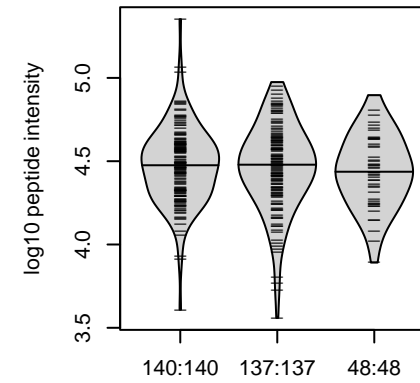

14:92348975:A:G\_A  
p = 0.43, beta = -0.0617, N = 325

**SVPADIFQMATTTR pc2**  
**G3V4U0;G3XA98;Q9UBX5**

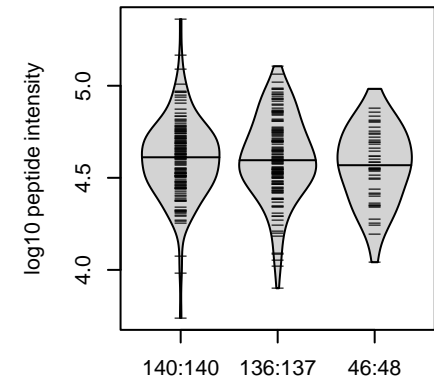

14:92348975:A:G\_A  
p = 0.5, beta = -0.0529, N = 322

Assay Target: FBLN5  
Olink UniProt: Q9UBX5  
deCODE rsID: rs2430349  
Proxy rsID: rs2430349  
deCODE: 14:91882631:A:G  
Proxy SNP: 14:92348975:A:G  
deCODE log10(p): 19.1  
deCODE BETA: 0.08  
-----  
1257:1257:1257:1256:1255:125

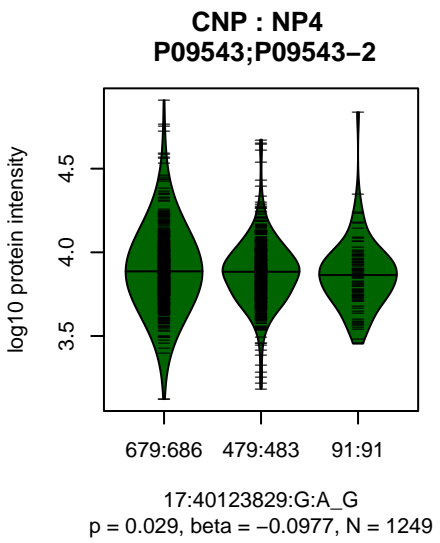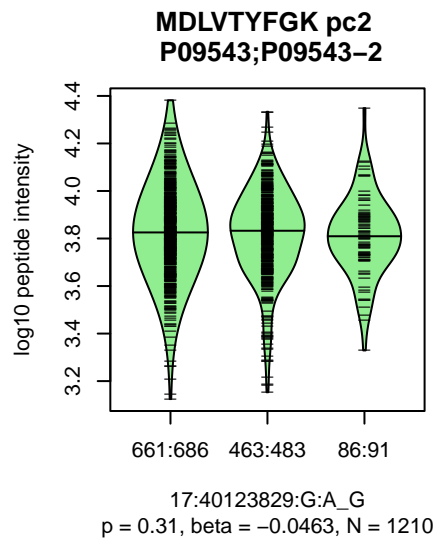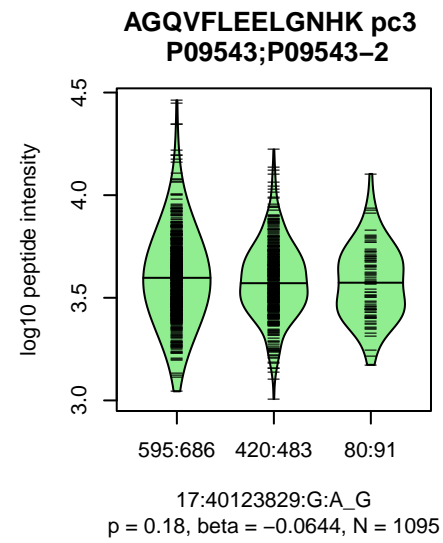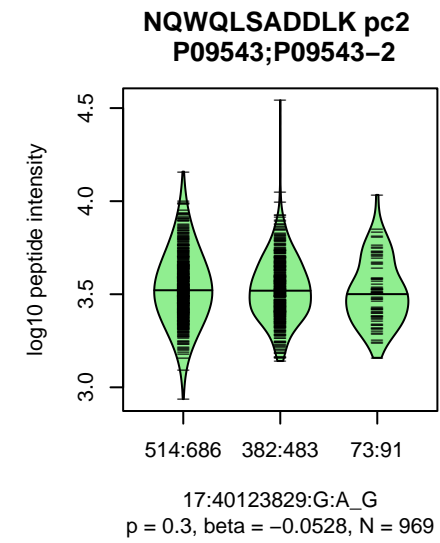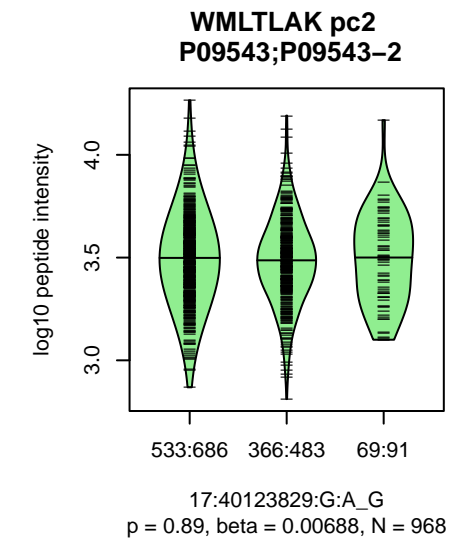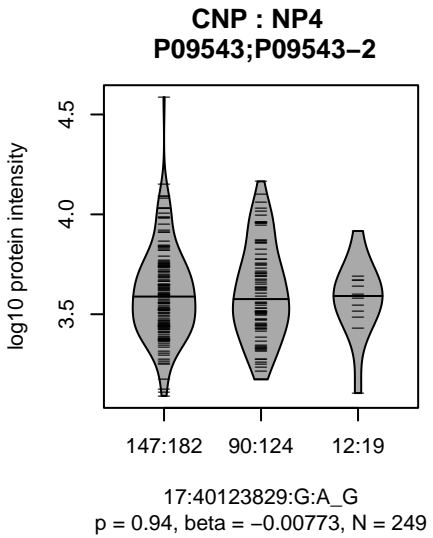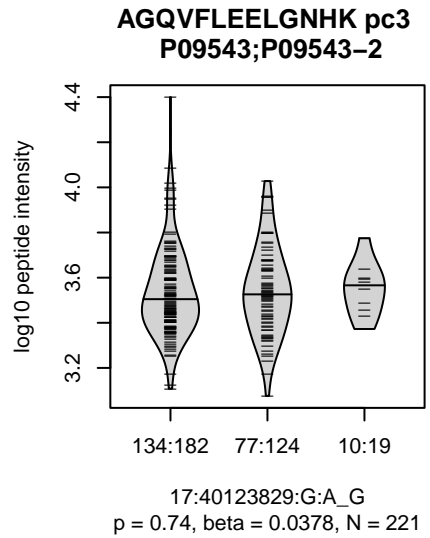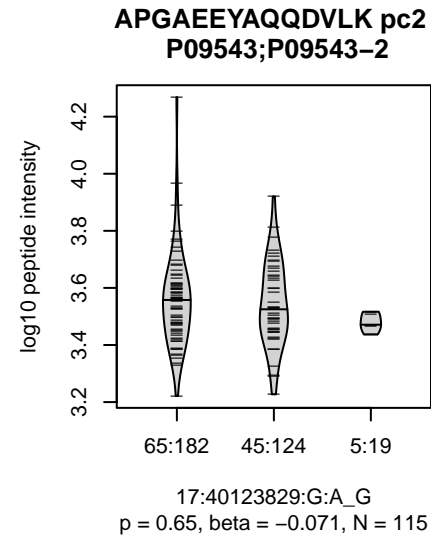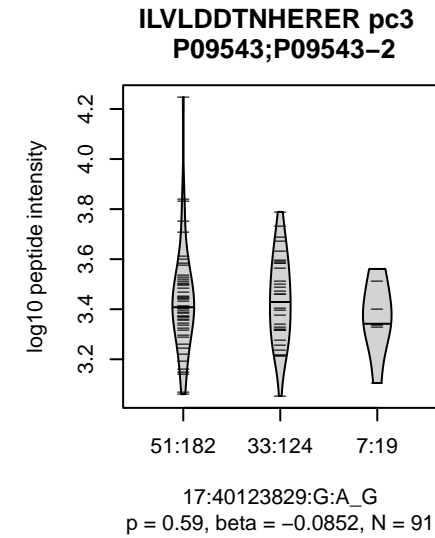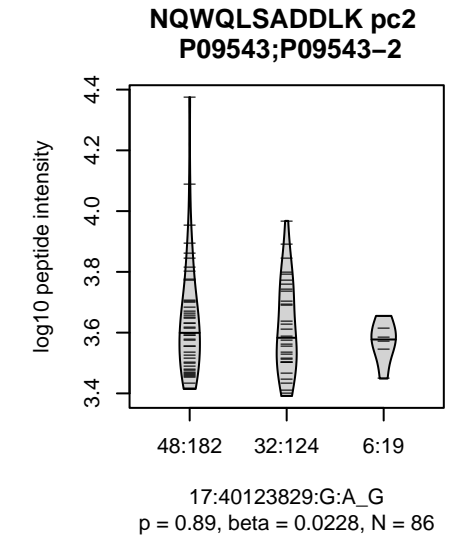

Assay Target: CNP  
 Olink UniProt: P09543  
 deCODE rsID: rs12602950  
 Proxy rsID: rs12602950  
 deCODE: 17:41971811:G:A  
 Proxy SNP: 17:40123829:G:A  
 deCODE log10(p): 19  
 deCODE BETA: -0.08  
 -----  
 1210:1095:969:968:914:853:79

**NAPG : NP2  
Q99747**

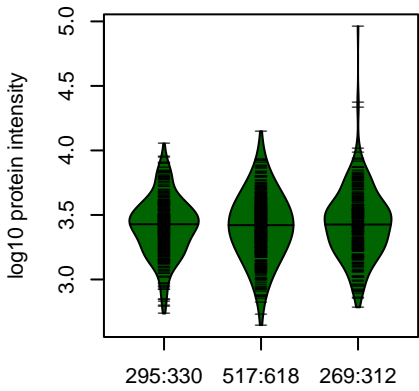

18:10526413:T:C\_C  
p = 0.46, beta = 0.0311, N = 1081

**LGLSLVPGGGIK pc2  
Q99747**

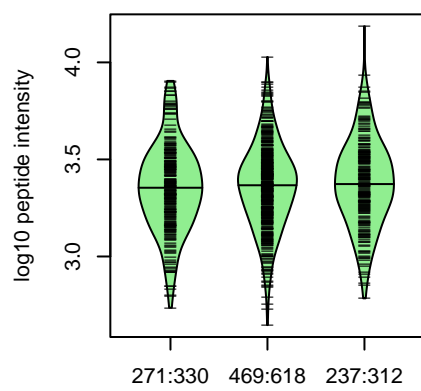

18:10526413:T:C\_C  
p = 0.16, beta = 0.0622, N = 977

**LPEAVQLIEK pc2  
Q99747**

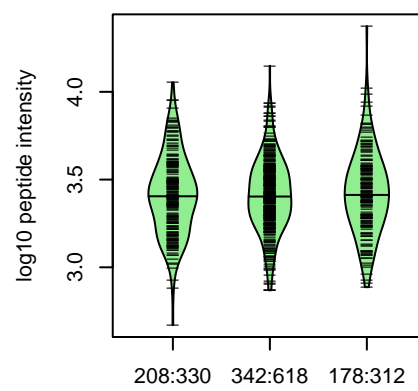

18:10526413:T:C\_C  
p = 0.38, beta = 0.0442, N = 728

**TIAQVLVHLHR pc3  
Q99747**

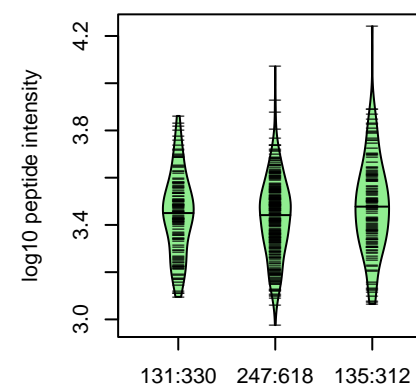

18:10526413:T:C\_C  
p = 0.19, beta = 0.0791, N = 513

**INEGLEHLAK pc2  
J3QKW4;J3QS28;Q99747**

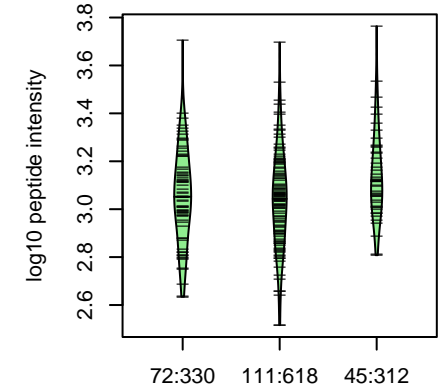

18:10526413:T:C\_C  
p = 0.21, beta = 0.115, N = 228

**NAPG : NP2  
Q99747**

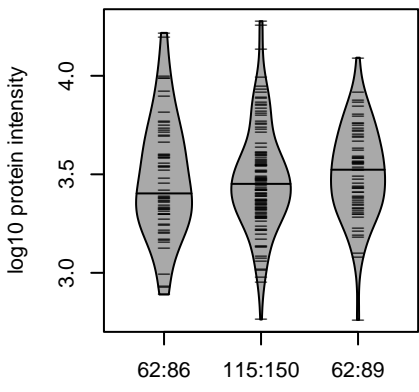

18:10526413:T:C\_T  
p = 0.54, beta = 0.0549, N = 239

**LPEAVQLIEK pc2  
Q99747**

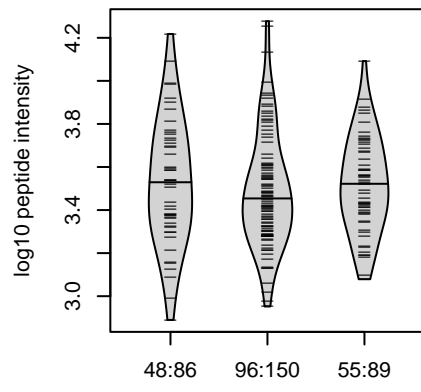

18:10526413:T:C\_T  
p = 0.89, beta = -0.0137, N = 199

**LGLSLVPGGGIK pc2  
Q99747**

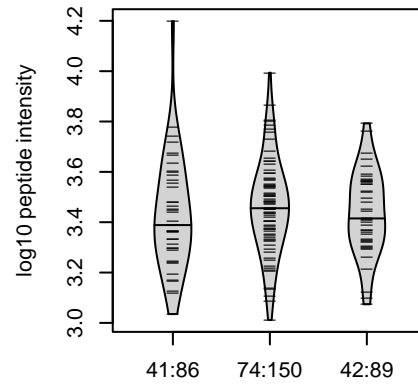

18:10526413:T:C\_T  
p = 0.95, beta = -0.00682, N = 157

**INEGLEHLAK pc2  
J3QKW4;J3QS28;Q99747**

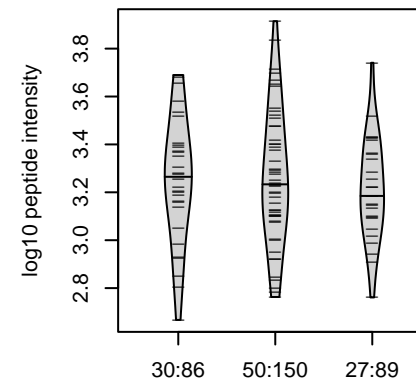

18:10526413:T:C\_T  
p = 0.36, beta = -0.118, N = 107

**FDEAALSIQK pc2  
Q99747**

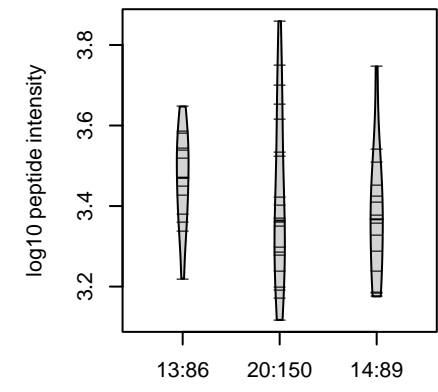

18:10526413:T:C\_T  
p = 0.032, beta = -0.384, N = 47

Assay Target: NAPG  
Olink UniProt: Q99747  
deCODE rsID: rs7241196  
Proxy rsID: rs7241196  
deCODE: 18:10526416:C:T  
Proxy SNP: 18:10526413:T:C  
deCODE log10(p): 18.2  
deCODE BETA: -0.07  
-----  
977:728:513:228:213:131:115:6

**PAICS : NP4  
P22234**

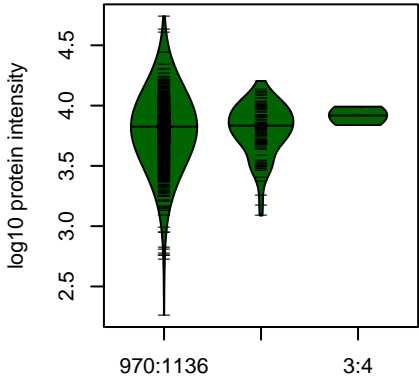

4:57314612:C:G\_G  
p = 0.64, beta = 0.0464, N = 1073

**SWLPQNCTLVDMK pc2  
D6RF62;P22234;P22234-2**

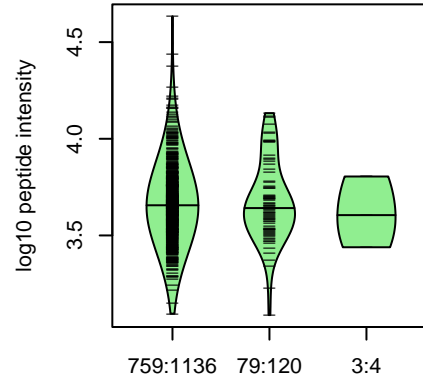

4:57314612:C:G\_G  
p = 0.96, beta = 0.00523, N = 841

**DQITAGNAAR pc2  
P22234;P22234-2**

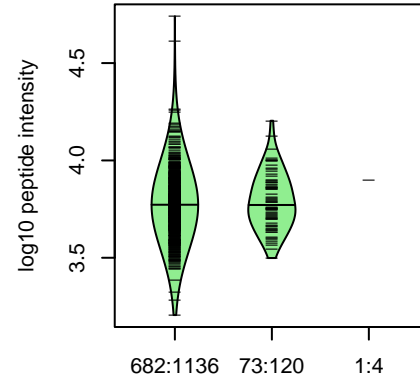

4:57314612:C:G\_G  
p = 0.43, beta = 0.0947, N = 756

**EVTPEGLQMVK pc2  
D6RF62;P22234;P22234-2**

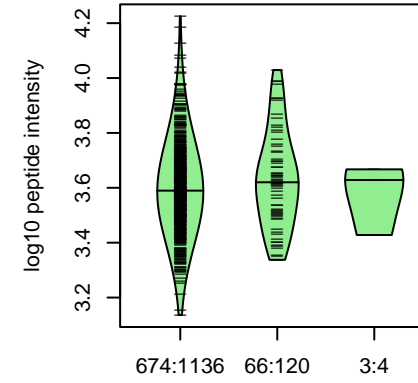

4:57314612:C:G\_G  
p = 0.21, beta = 0.147, N = 743

**VVVLMSGTSDLGHCEK pc3  
D6RF62;P22234;P22234-2**

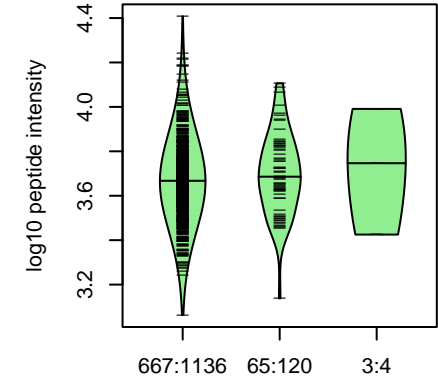

4:57314612:C:G\_G  
p = 0.21, beta = 0.149, N = 735

**PAICS : NP4  
P22234**

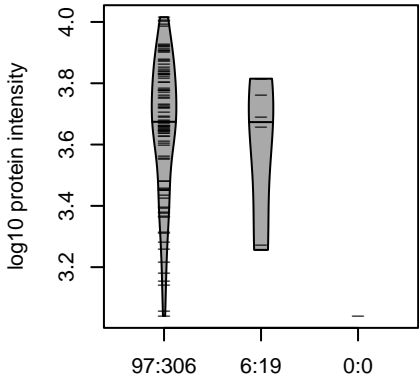

4:57314612:C:G\_G  
p = 0.34, beta = -0.388, N = 103

**SWLPQNCTLVDMK pc2  
D6RF62;P22234;P22234-2**

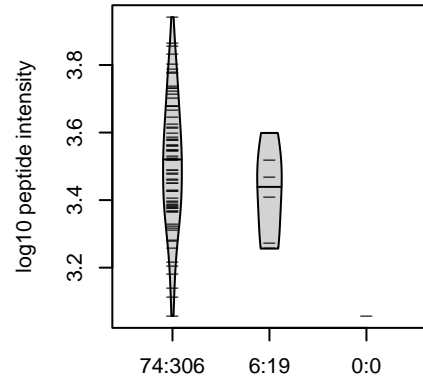

4:57314612:C:G\_G  
p = 0.21, beta = -0.518, N = 80

**ACGNFGIPCELR pc2  
D6RF62;P22234;P22234-2**

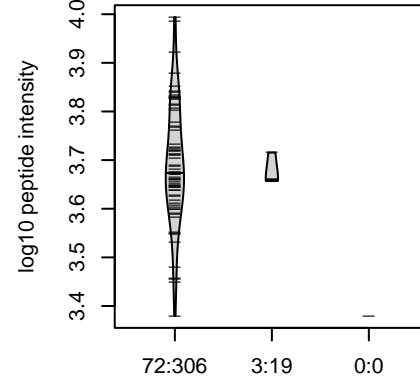

4:57314612:C:G\_G  
p = 0.31, beta = -0.573, N = 75

**EIVLADVIDNDSWR pc2  
D6RF62;P22234;P22234-2**

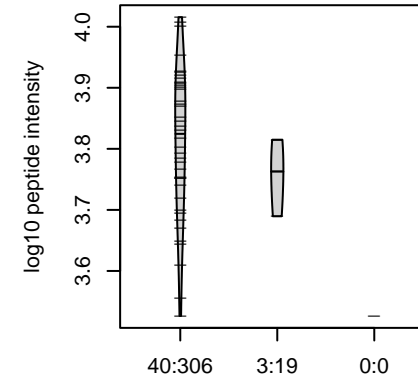

4:57314612:C:G\_G  
p = 0.5, beta = -0.387, N = 43

**VVVLMSGTSDLGHCEK pc3  
D6RF62;P22234;P22234-2**

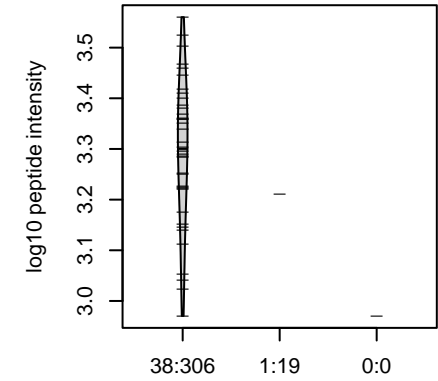

4:57314612:C:G\_G  
p = 0.12, beta = -1.48, N = 39

Assay Target: PAICS  
Olink UniProt: P22234  
deCODE rsID: rs138933625  
Proxy rsID: rs138933625  
deCODE: 4:56448446:G:C  
Proxy SNP: 4:57314612:C:G  
deCODE log10(p): 18.2  
deCODE BETA: -0.19  
- - - - - \* - - - - -  
841:756:743:735:661:568:566:4

**APP : NP5  
P05067**

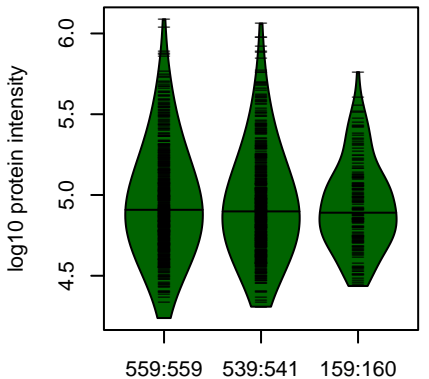

21:27528646:T:G\_T  
p = 0.22, beta = -0.0498, N = 1257

**CLVGEFVSDALLVPDK pc2**

0;P05067-10;P05067-11;P05067-4;PPG40;P05067-11;P05067-8;P05067-9;G40;P05067-11;P05067-8;P05067-9;P05067-10;P05067-11;P05067-4;P

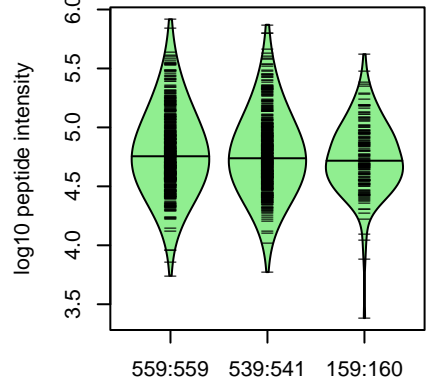

21:27528646:T:G\_T  
p = 0.076, beta = -0.0726, N = 1257

**CAPFFYGGCGGNR pc2**

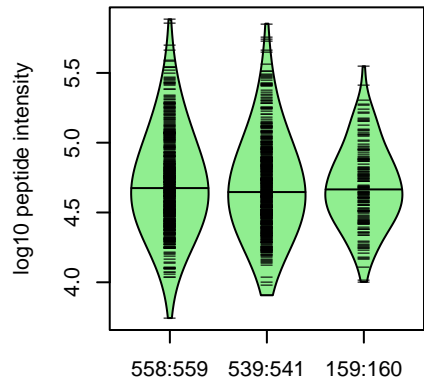

21:27528646:T:G\_T  
p = 0.25, beta = -0.0468, N = 1256

**WYFDVTEGK pc2**

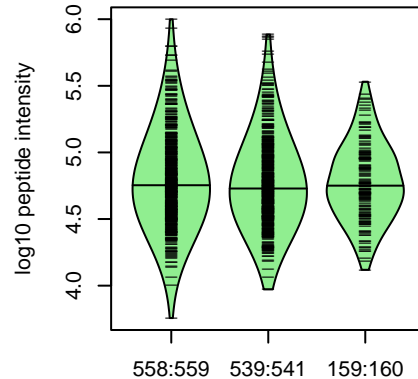

21:27528646:T:G\_T  
p = 0.36, beta = -0.0373, N = 1256

**ISYGN DALMPSLTETK pc2**

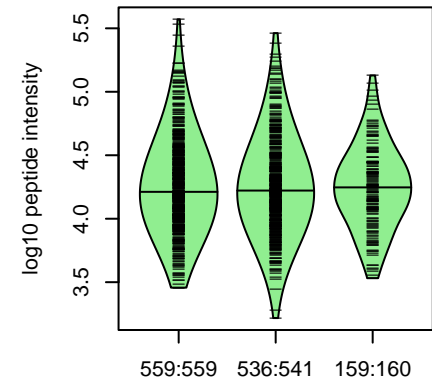

21:27528646:T:G\_T  
p = 0.61, beta = -0.0209, N = 1254

**APP : NP5  
P05067-8**

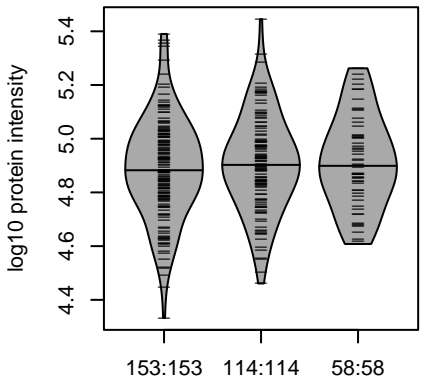

21:27528646:T:G\_T  
p = 0.42, beta = 0.0587, N = 325

**CAPFFYGGCGGNR pc2**

^G40;P05067-11;P05067-8;P05067-9;P05067-10;P05067-11;P05067-4;P0;P05067-10;P05067-11;P05067-4;P0;P05067-10;P05067-11;P05067-4;P

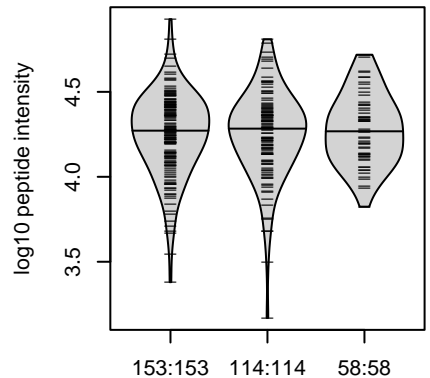

21:27528646:T:G\_T  
p = 0.56, beta = 0.0423, N = 325

**CLVGEFVSDALLVPDK pc2**

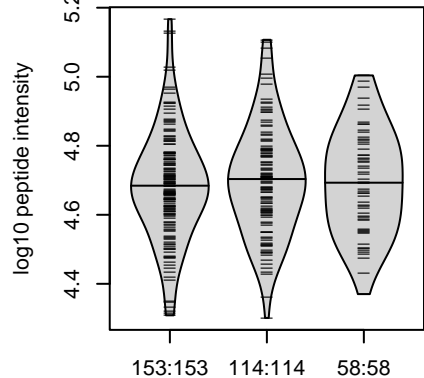

21:27528646:T:G\_T  
p = 0.46, beta = 0.0543, N = 325

**ISYGN DALMPSLTETK pc2**

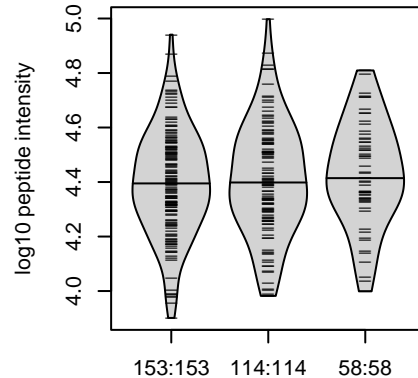

21:27528646:T:G\_T  
p = 0.3, beta = 0.0762, N = 325

**STNLHDYGMLLPCGIDK pc3**

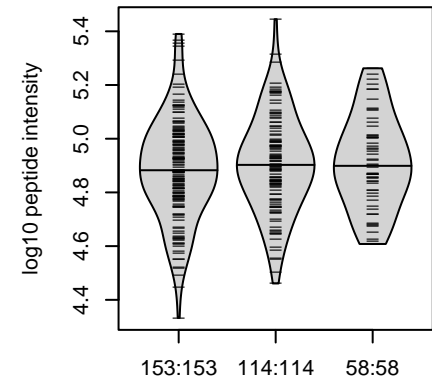

21:27528646:T:G\_T  
p = 0.39, beta = 0.0625, N = 325

**EWEEAER pc2  
rs2076190 ALT**

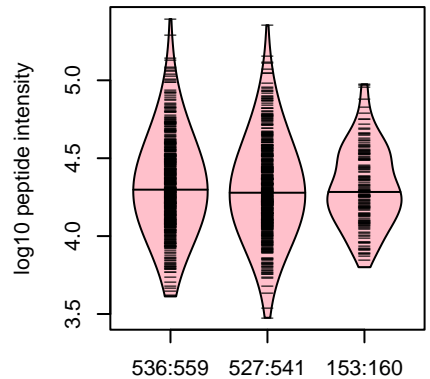

21:27528646:T:G\_T  
p = 0.28, model = REC, N = 1216

Assay Target: APP  
Olink UniProt: P05067  
deCODE rsID: rs439826  
Proxy rsID: rs439826  
deCODE: 21:26156328:T:G  
Proxy SNP: 21:27528646:T:G  
deCODE log10(p): 18.1  
deCODE BETA: 0.08  
-----  
1257:1256:1256:1254:1251:125

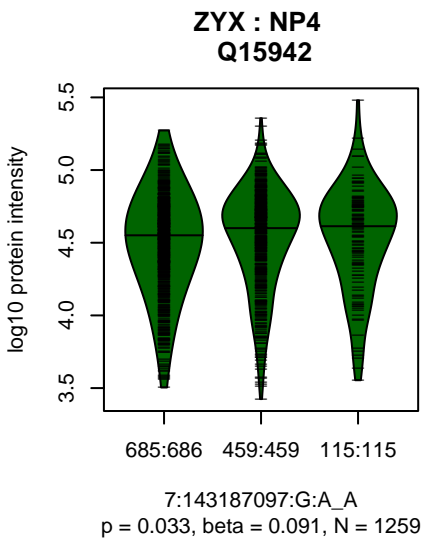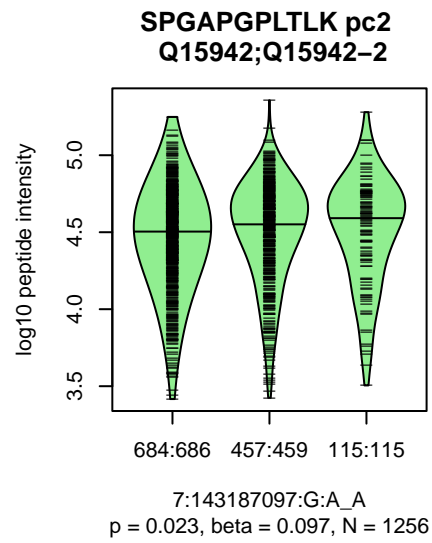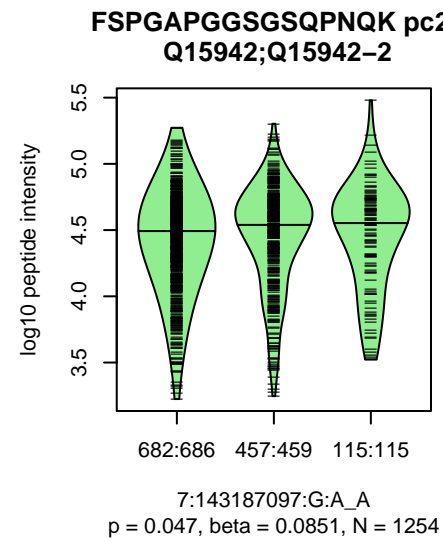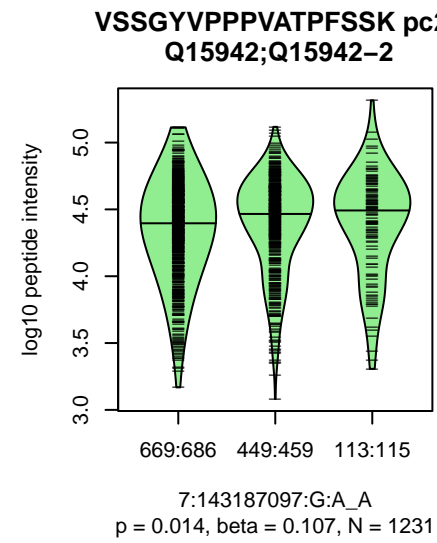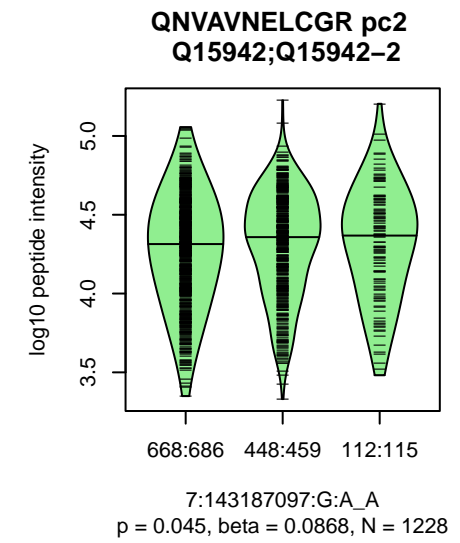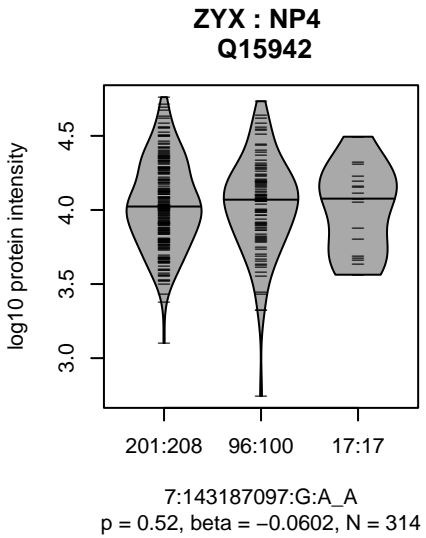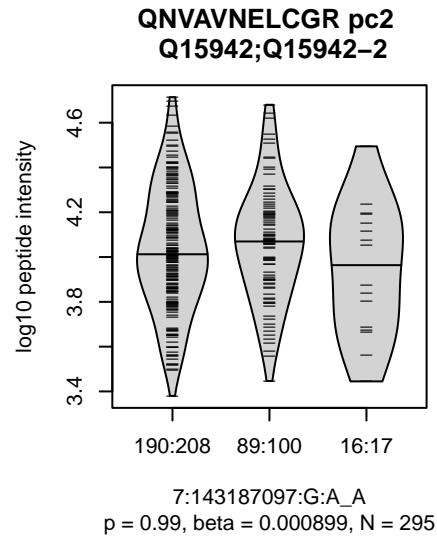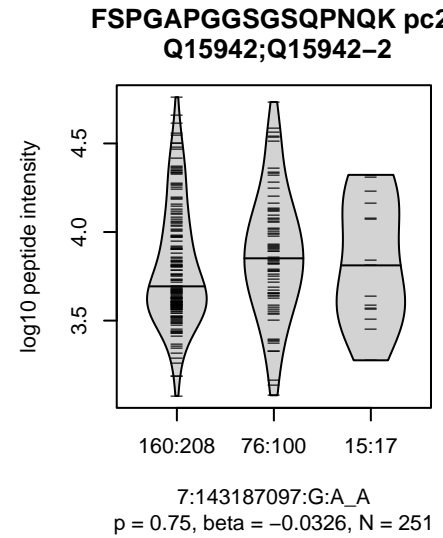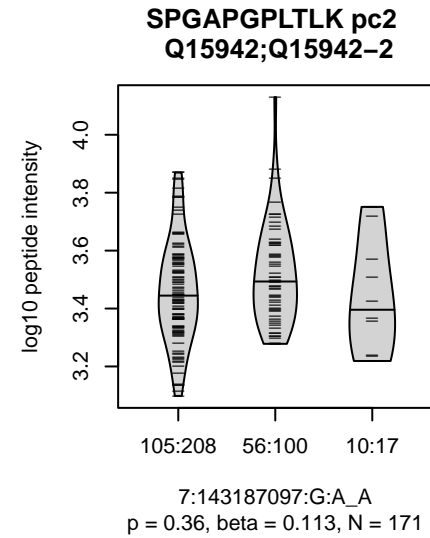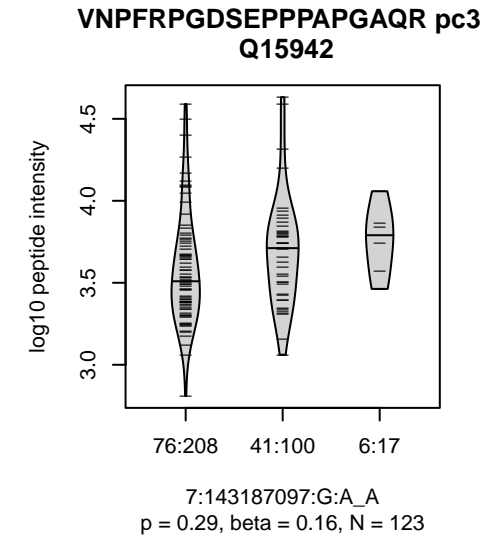

Assay Target: ZYX  
 Olink UniProt: Q15942  
 deCODE rsID: rs12539742  
 Proxy rsID: rs12539742  
 deCODE: 7:143490004:A:G  
 Proxy SNP: 7:143187097:G:A  
 deCODE log10(p): 18.1  
 deCODE BETA: 0.08  
 -----\*-----  
 1256:1254:1231:1228:1171:113

**FABP4 : NP2**  
**P15090**

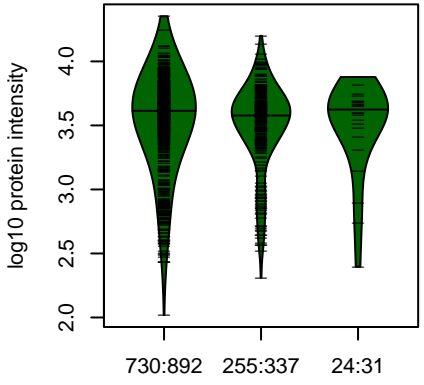

8:82366217:A:T\_T  
 $p = 0.075$ ,  $\beta = -0.11$ ,  $N = 1009$

**LVVECVMK pc2**  
**P15090**

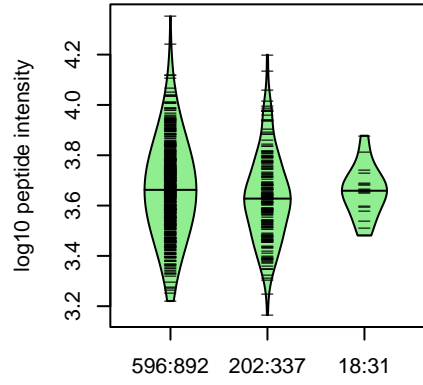

8:82366217:A:T\_T  
 $p = 0.047$ ,  $\beta = -0.138$ ,  $N = 816$

**PNMIISVNGDVITIK pc2**  
**P15090**

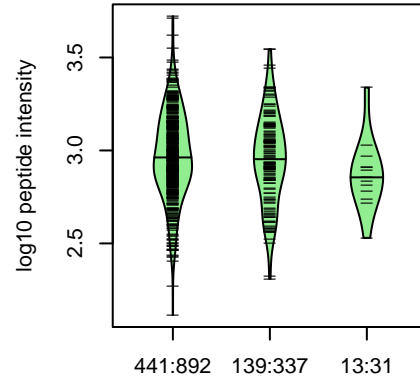

8:82366217:A:T\_T  
 $p = 0.23$ ,  $\beta = -0.0979$ ,  $N = 593$

**STITLDGGVLVHVQK pc2**  
**P15090**

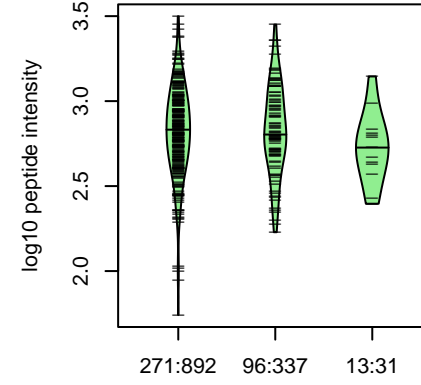

8:82366217:A:T\_T  
 $p = 0.44$ ,  $\beta = -0.0733$ ,  $N = 380$

**LVSSENFDDYMK pc2**  
**E5RH45;E5RIR0;P02689;P15090**

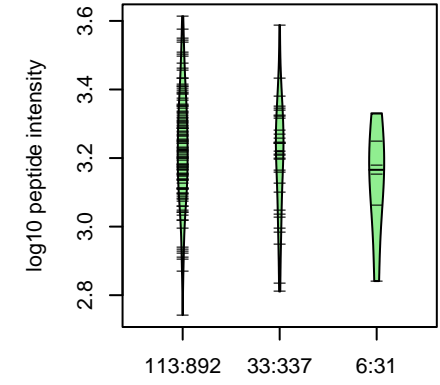

8:82366217:A:T\_T  
 $p = 0.2$ ,  $\beta = -0.19$ ,  $N = 152$

**FABP4 : NP2**  
**P15090**

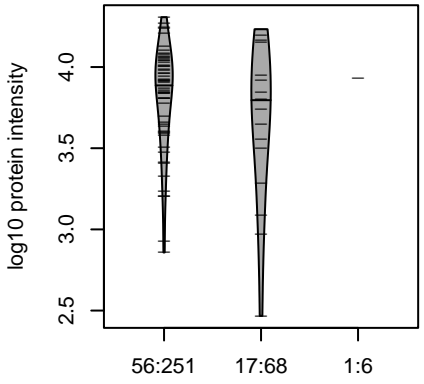

8:82366217:A:T\_T  
 $p = 0.7$ ,  $\beta = -0.0913$ ,  $N = 74$

**LVSSENFDDYMK pc2**  
**E5RH45;E5RIR0;P02689;P15090**

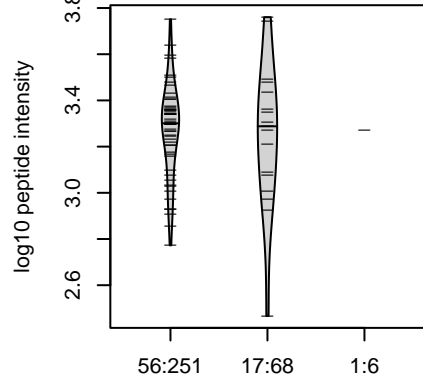

8:82366217:A:T\_T  
 $p = 0.6$ ,  $\beta = 0.125$ ,  $N = 74$

Assay Target: FABP4  
Olink UniProt: P15090  
deCODE rsID: rs16909138  
Proxy rsID: rs16909138  
deCODE: 8:81453981:TT:!  
Proxy SNP: 8:82366217:A:T  
deCODE log10(p): 17.4  
deCODE BETA: -0.1  
-:-:-:-\*  
816:593:380:152:149

**HDGF : NP2  
P51858**

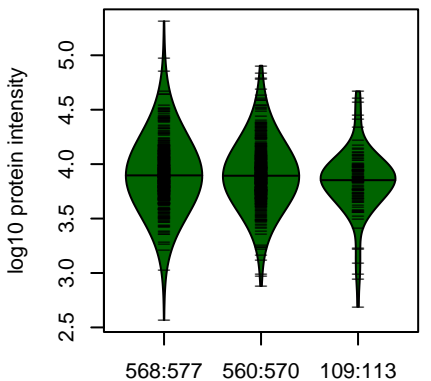

1:156722424:G:C\_C  
p = 0.19, beta = -0.0577, N = 1237

**EAENPEGEEK pc2  
P51858-2;P51858-3;P51858**

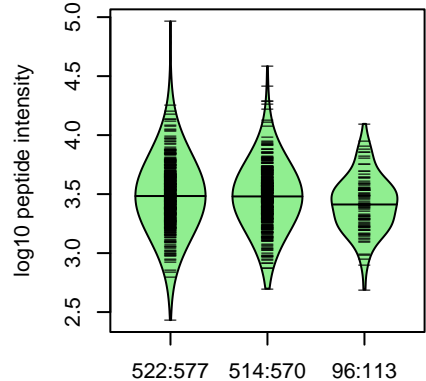

1:156722424:G:C\_C  
p = 0.038, beta = -0.0965, N = 1132

**YQVFFFGTHETAFLGPK pc3  
P51858-2;P51858-3;P51858**

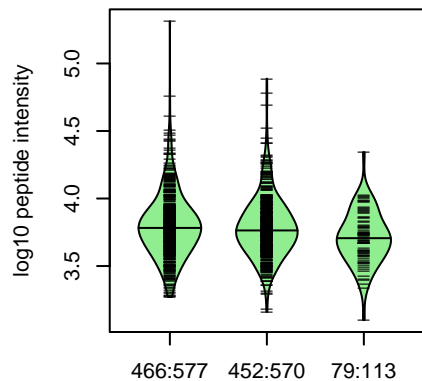

1:156722424:G:C\_C  
p = 0.034, beta = -0.106, N = 997

**EAATLEVERPLPMEVEK pc3  
P51858-2;P51858-3;P51858**

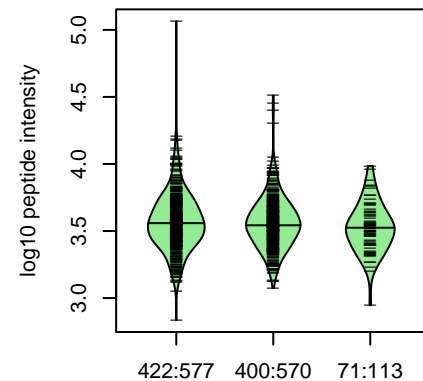

1:156722424:G:C\_C  
p = 0.29, beta = -0.0556, N = 893

**AGDLLDSPK pc2  
P51858-2;P51858-3;P51858**

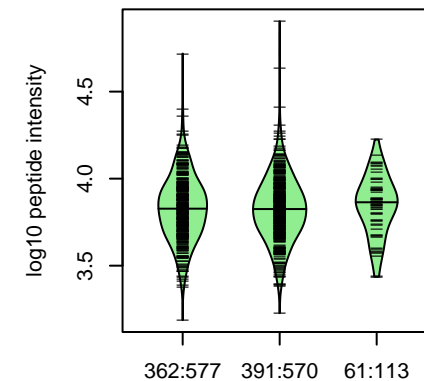

1:156722424:G:C\_C  
p = 0.8, beta = 0.0139, N = 814

**HDGF : NP2  
P51858**

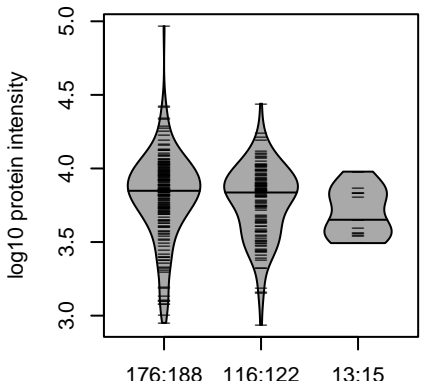

1:156722424:G:C\_C  
p = 0.067, beta = -0.179, N = 305

**YQVFFFGTHETAFLGPK pc3  
P51858-2;P51858-3;P51858**

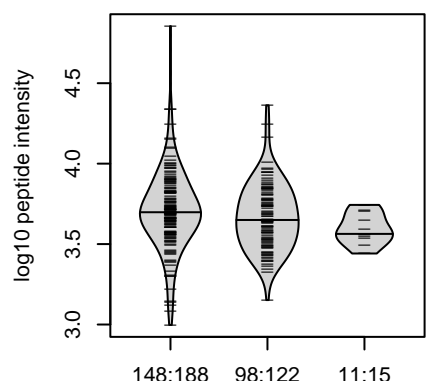

1:156722424:G:C\_C  
p = 0.044, beta = -0.213, N = 257

**EAATLEVERPLPMEVEK pc3  
P51858-2;P51858-3;P51858**

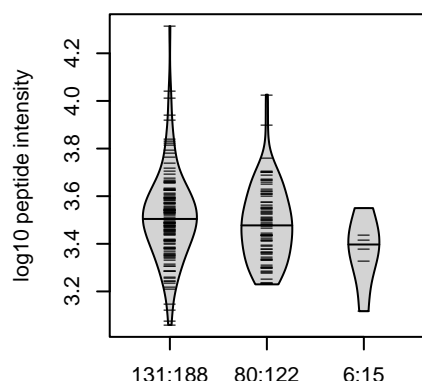

1:156722424:G:C\_C  
p = 0.053, beta = -0.236, N = 217

**DLPFYEEK pc2  
P51858-2;P51858-3;P51858**

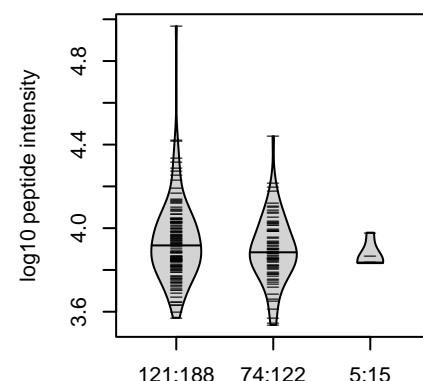

1:156722424:G:C\_C  
p = 0.25, beta = -0.149, N = 200

**EAENPEGEEK pc2  
P51858-2;P51858-3;P51858**

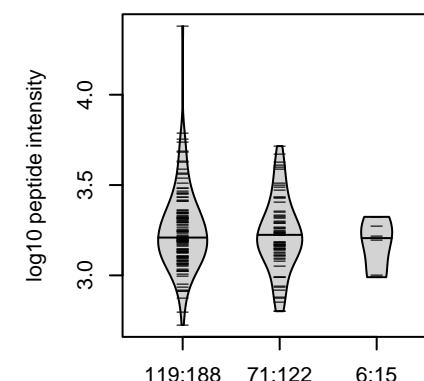

1:156722424:G:C\_C  
p = 0.38, beta = -0.111, N = 196

**NSTLSEPGSGR pc2  
rs4399146 ALT**

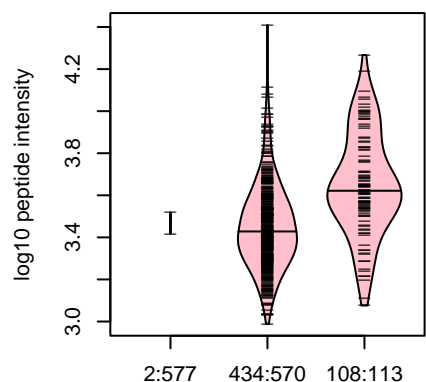

1:156722424:G:C\_C  
p = 3.4e-218, model = REC, N = 544

**NSTPSEPGSGR pc2  
rs4399146 REF**

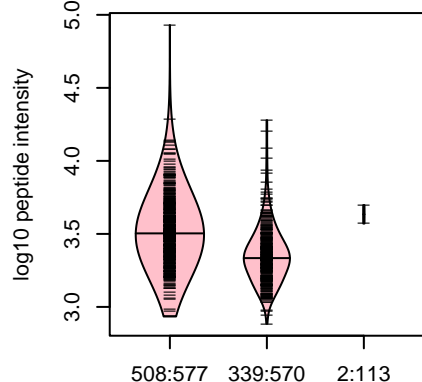

1:156722424:G:C\_C  
p = 3.8e-56, model = DOM, N = 849

Assay Target: HDGF  
Olink UniProt: P51858  
deCODE rsID: rs11264535  
Proxy rsID: rs11264535  
deCODE 1:156752632:C:G  
Proxy SNP: 1:156722424:G:C  
deCODE log10(p): 17.4  
deCODE BETA: -0.08  
-----  
1132:997:893:814:787:637:547:



**MIF : NP1  
P14174**

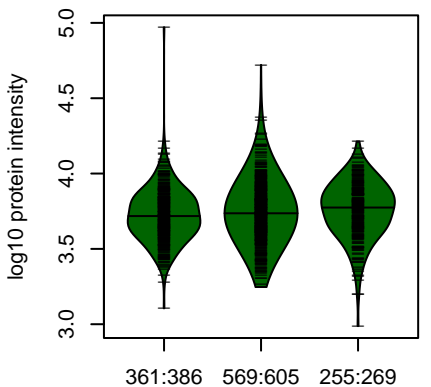

22:24297130:T:C\_T  
p = 0.028, beta = 0.0886, N = 1185

**PMFIVNTNVPR pc2  
P14174**

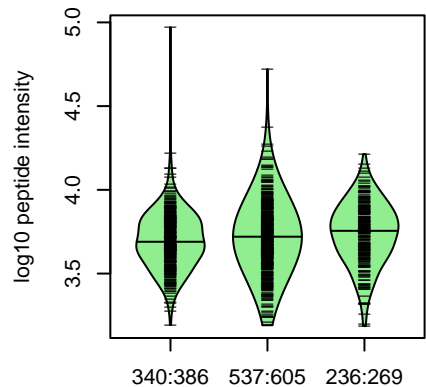

22:24297130:T:C\_T  
p = 0.022, beta = 0.0954, N = 1113

**LLCGLLAER pc2  
P14174**

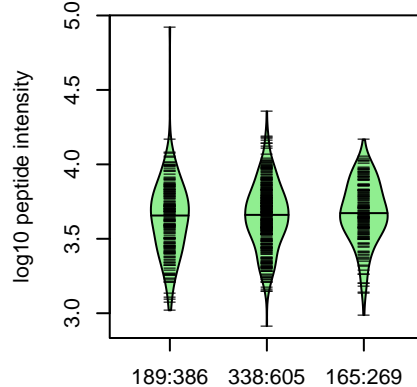

22:24297130:T:C\_T  
p = 0.12, beta = 0.082, N = 692

**MIF : NP1  
P14174**

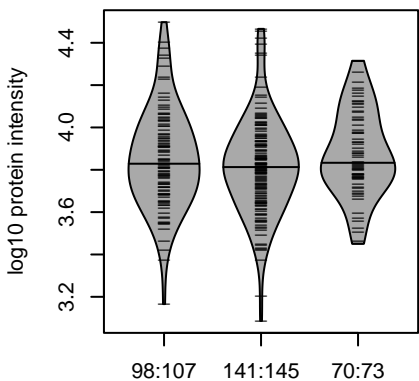

22:24297130:T:C\_T  
p = 0.57, beta = 0.0437, N = 309

**LLCGLLAER pc2  
P14174**

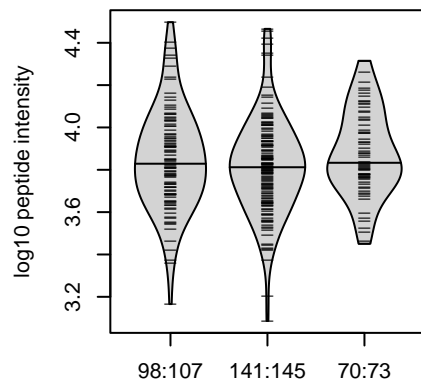

22:24297130:T:C\_T  
p = 0.5, beta = 0.0514, N = 309

**PMFIVNTNVPR pc2  
P14174**

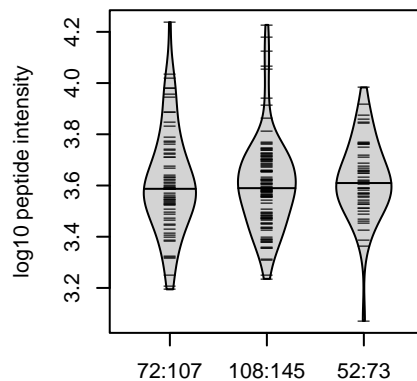

22:24297130:T:C\_T  
p = 0.36, beta = 0.0809, N = 232

Assay Target: MIF  
Olink UniProt: P14174  
deCODE rsID: rs2739338  
Proxy rsID: rs2739338  
deCODE: 22:23954943:T:C  
Proxy SNP: 22:24297130:T:C  
deCODE log10(p): 17.3  
deCODE BETA: 0.07  
-:-  
1113:692

**HDGF : NP2  
P51858**



1:156722424:G:C\_C  
p = 0.19, beta = -0.0577, N = 1237

**EAENPEGEEK pc2  
P51858-2;P51858-3;P51858**



1:156722424:G:C\_C  
p = 0.038, beta = -0.0965, N = 1132

**YQVFFFGTHETAFLGPK pc3  
P51858-2;P51858-3;P51858**



1:156722424:G:C\_C  
p = 0.034, beta = -0.106, N = 997

**EAATLEVERPLPMEVEK pc3  
P51858-2;P51858-3;P51858**

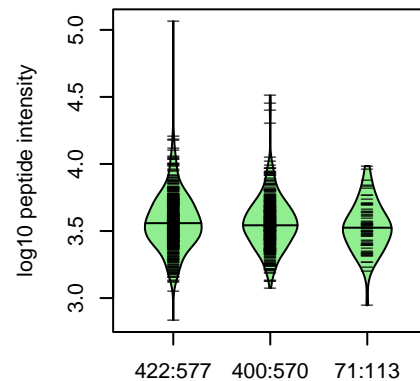

1:156722424:G:C\_C  
p = 0.29, beta = -0.0556, N = 893

**AGDLLDSPK pc2  
P51858-2;P51858-3;P51858**

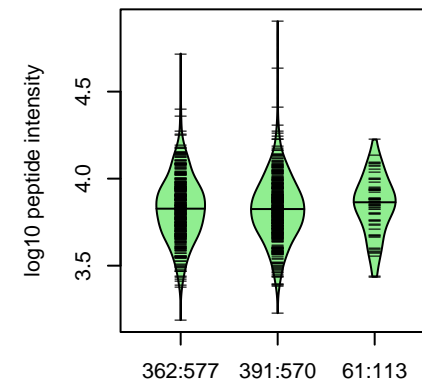

1:156722424:G:C\_C  
p = 0.8, beta = 0.0139, N = 814

**HDGF : NP2  
P51858**



1:156722424:G:C\_C  
p = 0.067, beta = -0.179, N = 305

**YQVFFFGTHETAFLGPK pc3  
P51858-2;P51858-3;P51858**



1:156722424:G:C\_C  
p = 0.044, beta = -0.213, N = 257

**EAATLEVERPLPMEVEK pc3  
P51858-2;P51858-3;P51858**



1:156722424:G:C\_C  
p = 0.053, beta = -0.236, N = 217

**DLPFYEEK pc2  
P51858-2;P51858-3;P51858**

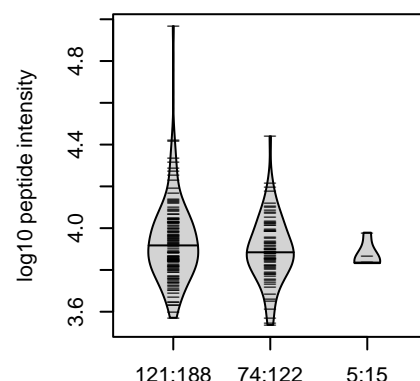

1:156722424:G:C\_C  
p = 0.25, beta = -0.149, N = 200

**EAENPEGEEK pc2  
P51858-2;P51858-3;P51858**

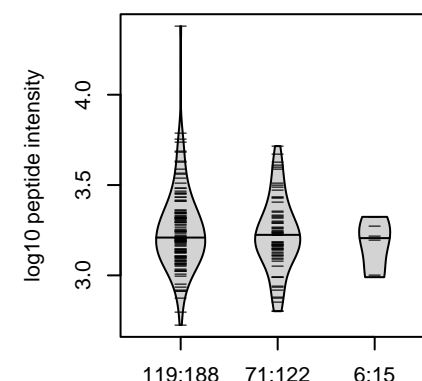

1:156722424:G:C\_C  
p = 0.38, beta = -0.111, N = 196

**NSTLSEPGSGR pc2  
rs4399146 ALT**



1:156722424:G:C\_C  
p = 3.4e-218, model = REC, N = 544

**NSTPSEPGSGR pc2  
rs4399146 REF**



1:156722424:G:C\_C  
p = 3.8e-56, model = DOM, N = 849

Assay Target: HDGF  
Olink UniProt: P51858  
deCODE rsID: rs11264535  
Proxy rsID: rs11264535  
deCODE 1:156752632:C:G  
Proxy SNP: 1:156722424:G:C  
deCODE log10(p): 17.1  
deCODE BETA: -0.08  
-----  
1132:997:893:814:787:637:547:

**DBNL : NP2  
Q9UJU6**

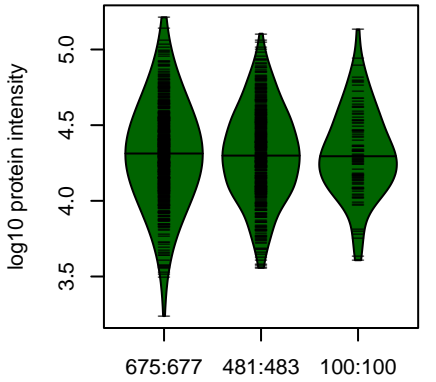

7:44108169:T:G\_G  
p = 0.82, beta = -0.00995, N = 1256

**NGPALQEAYVR pc2**

**B2;F8WBG8;F8WC20;F8WCK3;F8WF6;Q9UJU6-2;Q9UJU6-3;Q9UJU6-4;Q6;Q9UJU6-2;Q9UJU6-3;Q9UJU6-4;Q9UJU6;Q9UJU6-2;Q9UJU6-3;Q9UJU6-4**

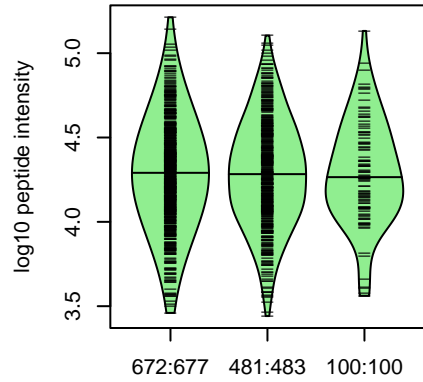

7:44108169:T:G\_G  
p = 0.89, beta = -0.00619, N = 1253

**TWEQQQEVVSR pc2**

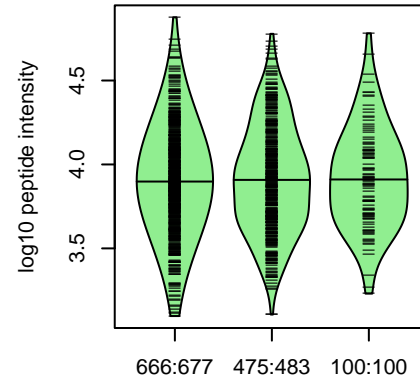

7:44108169:T:G\_G  
p = 0.64, beta = 0.0204, N = 1241

**AMSTTSSSPQPGK pc2**

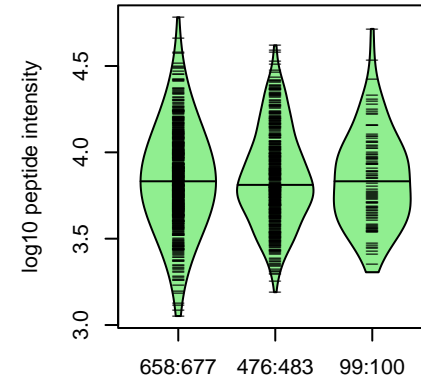

7:44108169:T:G\_G  
p = 0.99, beta = -0.000824, N = 1233

**FQDVGPQAPVGSVYQK pc2**

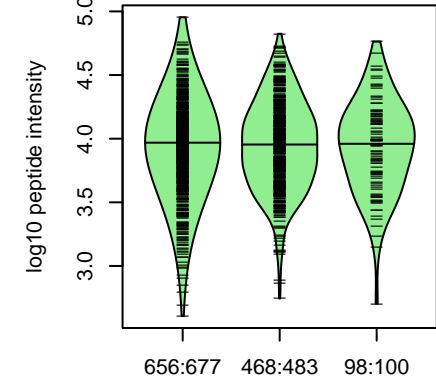

7:44108169:T:G\_G  
p = 0.64, beta = 0.0209, N = 1222

**DBNL : NP2  
Q9UJU6**

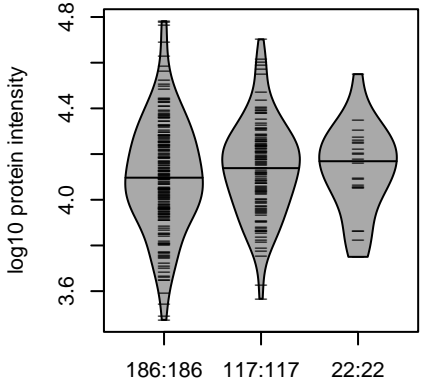

7:44108169:T:G\_G  
p = 0.26, beta = 0.0987, N = 325

**NGPALQEAYVR pc2**

**B2;F8WBG8;F8WC20;F8WCK3;F8WFF8WBG8;Q9UJU6;Q9UJU6-2;Q9UJU66;Q9UJU6-2;Q9UJU6-3;Q9UJU6-4;Q9UJU6;Q9UJU6-2;Q9UJU6-3;Q9UJU6-4**

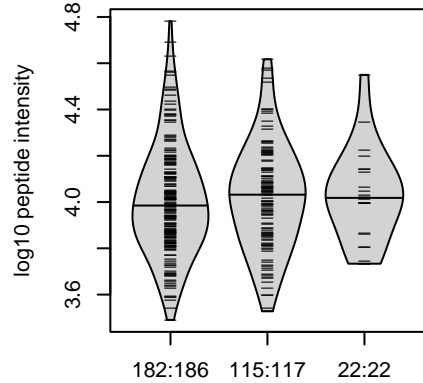

7:44108169:T:G\_G  
p = 0.35, beta = 0.0824, N = 319

**VMYAFCR pc2**

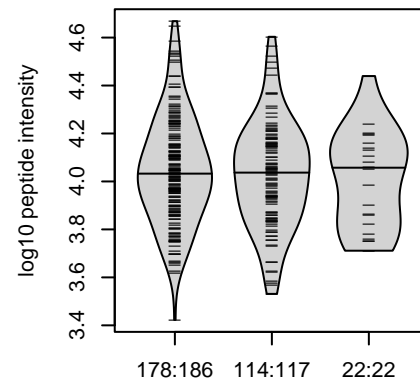

7:44108169:T:G\_G  
p = 0.42, beta = -0.0713, N = 314

**TWEQQQEVVSR pc2**

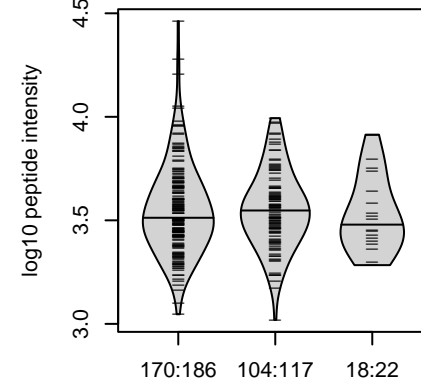

7:44108169:T:G\_G  
p = 0.93, beta = 0.00865, N = 292

**AEEDVEPECIMEK pc2**

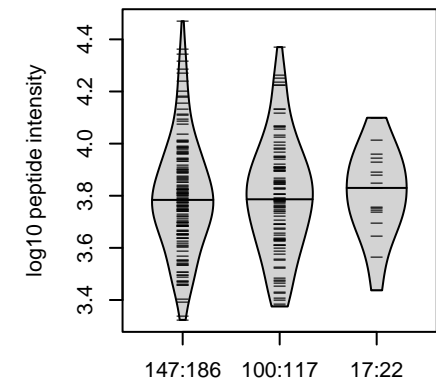

7:44108169:T:G\_G  
p = 0.92, beta = 0.0101, N = 264

Assay Target: DBNL  
Olink UniProt: Q9UJU6  
deCODE rsID: rs56665454  
Proxy rsID: rs10236567  
deCODE: 7:44037871:T:C  
Proxy SNP: 7:44108169:T:G  
deCODE log10(p): 16.7  
deCODE BETA: 0.07  
-----  
1253:1241:1233:1222:1182:112

**KCNAB2 : NP4**  
**Q13303-2**

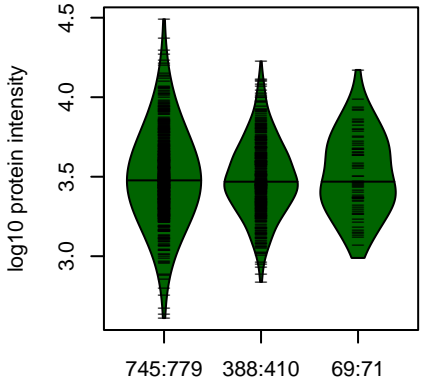

1:6052581:G:A\_G  
p = 0.56, beta = -0.0277, N = 1202

**AEVVLGNIK pc2**

**⚡;A0A590UK89;A0A5F9UN28;K7EIR5;⚡;A0A5F9UN28;Q13303-2;Q13303-3;⚡B7Z8E5;F8W6W4;Q13303-2;Q13303-3;⚡A0A5F9UN28;Q13303-2;Q13303-3**

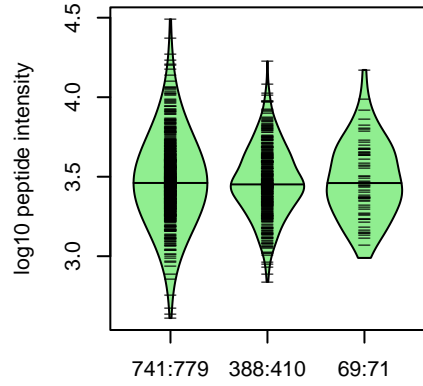

1:6052581:G:A\_G  
p = 0.34, beta = -0.046, N = 1198

**LSSIIHEIDSILGNK pc3**

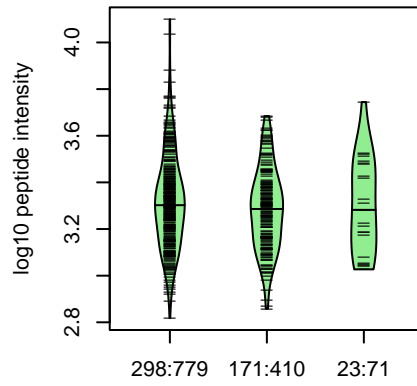

1:6052581:G:A\_G  
p = 0.15, beta = -0.11, N = 492

**SSLVITTK pc2**

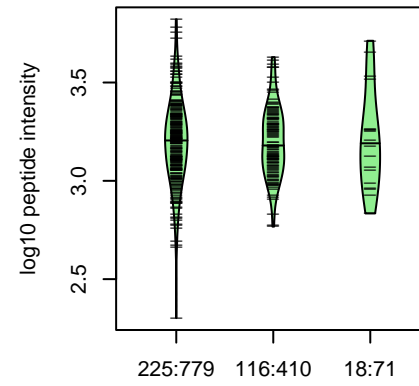

1:6052581:G:A\_G  
p = 0.89, beta = -0.012, N = 359

**VEVQLPELFHK pc3**

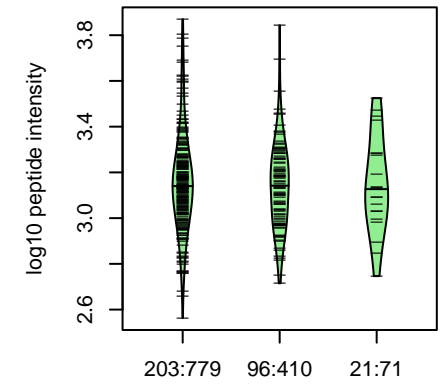

1:6052581:G:A\_G  
p = 0.73, beta = -0.031, N = 320

**AEVVLGNIK pc2**

**⚡;A0A590UK89;A0A5F9UN28;K7EIR5;⚡**

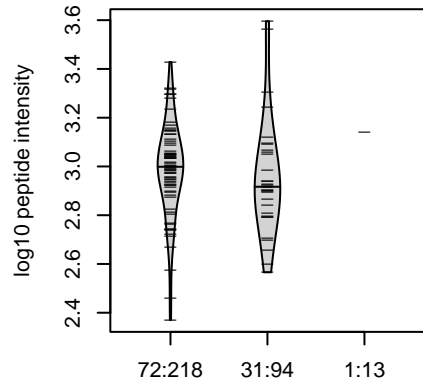

1:6052581:G:A\_G  
p = 0.94, beta = -0.0142, N = 104

Assay Target: KCNAB2  
Olink UniProt: Q13303  
deCODE rsID: rs806109  
Proxy rsID: rs806109  
deCODE: 1:5992521:G:A  
Proxy SNP: 1:6052581:G:A  
deCODE log10(p): 16.2  
deCODE BETA: -0.08  
-----  
1198:492:359:320:311:274:228:

**MMP9 : NP5  
P14780**

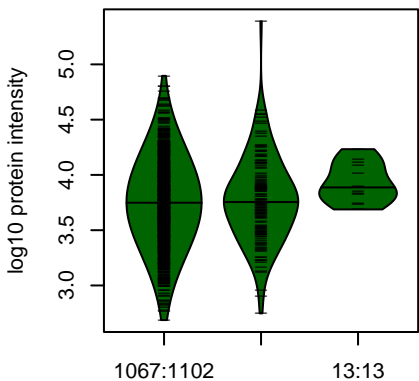

20:44642406:G:C\_G  
 $p = 0.14$ ,  $\beta = 0.112$ ,  $N = 1219$

**SLGPALLLQK pc2  
P14780**

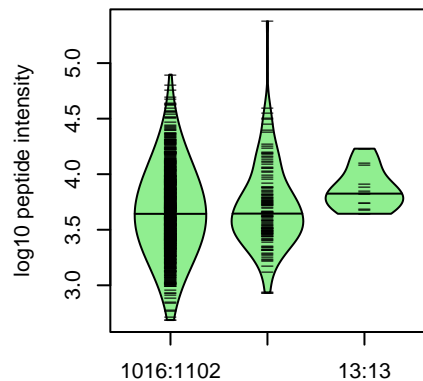

20:44642406:G:C\_G  
 $p = 0.03$ ,  $\beta = 0.169$ ,  $N = 1163$

**LGLGADVAQVTGALR pc2  
P14780**

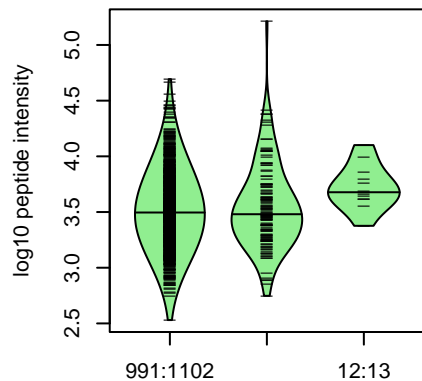

20:44642406:G:C\_G  
 $p = 0.066$ ,  $\beta = 0.145$ ,  $N = 1135$

**QVWVYTGASVLGPR pc2  
P14780**

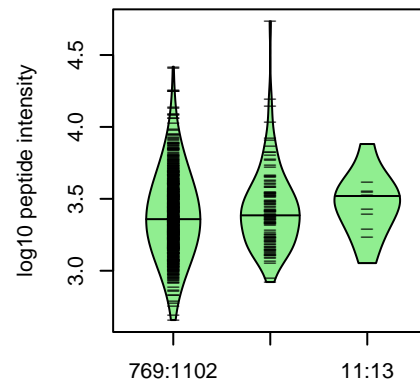

20:44642406:G:C\_G  
 $p = 0.14$ ,  $\beta = 0.128$ ,  $N = 890$

**LFGFCPTR pc2  
P14780**

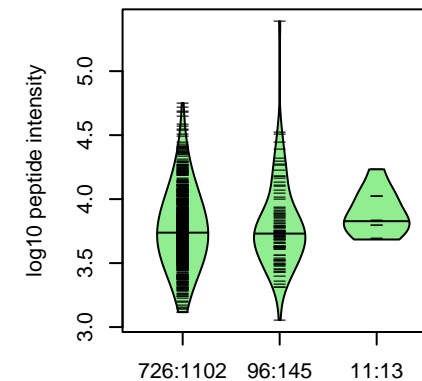

20:44642406:G:C\_G  
 $p = 0.36$ ,  $\beta = 0.082$ ,  $N = 833$

**MMP9 : NP5  
P14780**

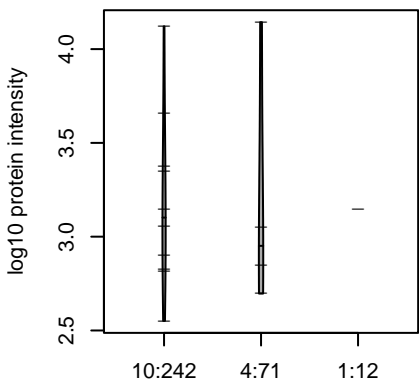

20:44642406:G:C\_G  
 $p = 0.54$ ,  $\beta = 0.233$ ,  $N = 15$

**KLDSVFEEER pc2  
rs2250889 REF**

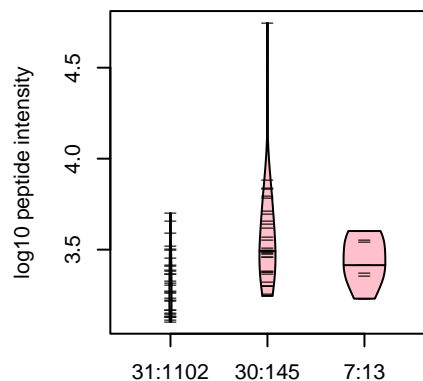

20:44642406:G:C\_G  
 $p = 6.9e-18$ , model = REC,  $N = 68$

**KLDSVFEEPLSK pc3  
rs2250889 ALT**

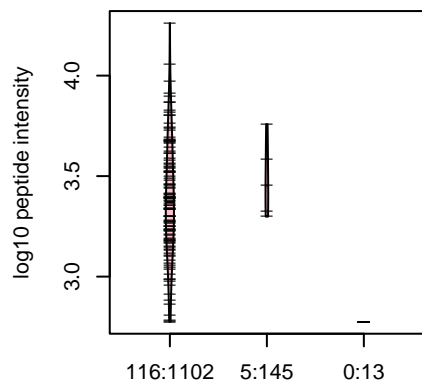

20:44642406:G:C\_G  
 $p = 0.0021$ , model = REC,  $N = 121$

**KLDSVFEEPLSK pc2  
rs2250889 ALT**

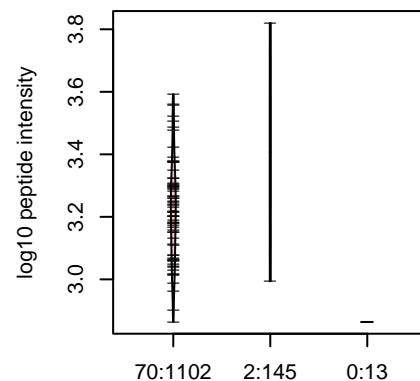

20:44642406:G:C\_G  
 $p = 0.0056$ , model = REC,  $N = 72$

**LYTQDGNADGK pc2  
rs17576 REF**

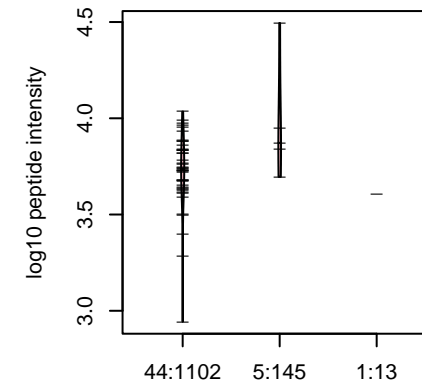

20:44642406:G:C\_G  
 $p = 0.41$ , model = DOM,  $N = 50$

Assay Target: MMP9  
Olink UniProt: P14780  
deCODE rsID: rs2250889  
Proxy rsID: rs2250889  
deCODE: 20:46013767:G:C  
Proxy SNP: 20:44642406:G:C  
deCODE log10(p): 16  
deCODE BETA: 0.17  
-----  
1163:1135:890:833:704:679:657



**PROS1 : NP4**  
A0A3B3ISJ1;P07225

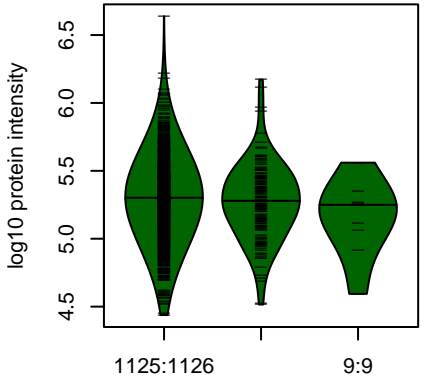

3:93975240:G:A\_A  
p = 0.83, beta = -0.0173, N = 1259

**IQALS LCS DQ QSHLEFR pc3**  
A0A3B3ISJ1;G5E9F8;P07225

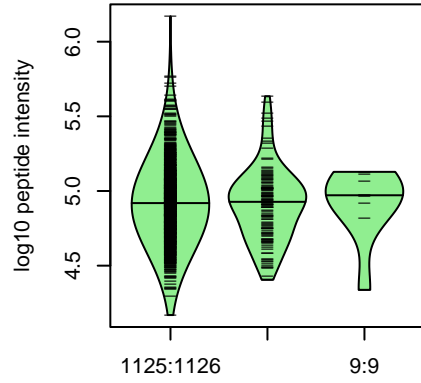

3:93975240:G:A\_A  
p = 0.35, beta = 0.0778, N = 1259

**QSTNAYPDLR pc2**  
A0A3B3IRK9;A0A3B3ISJ1;G5E9F8;P0A0A3B3IRK9;A0A3B3ISJ1;G5E9F8;P0

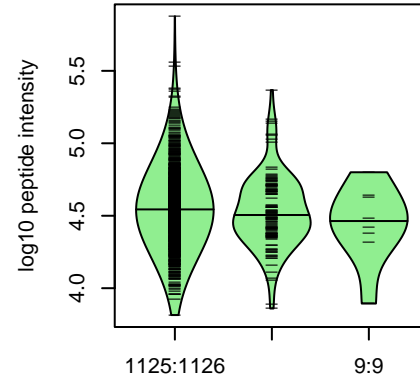

3:93975240:G:A\_A  
p = 0.74, beta = -0.0273, N = 1259

**SFQTGLFTAAR pc2**

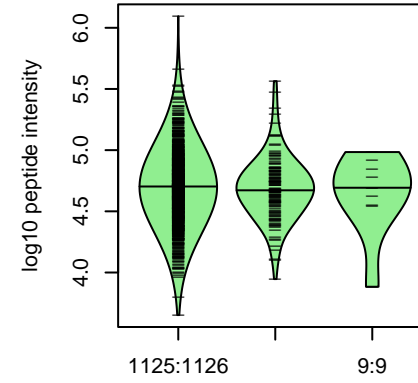

3:93975240:G:A\_A  
p = 0.58, beta = 0.0463, N = 1259

**NNLELSTPLK pc2**  
A0A3B3ISJ1;G5E9F8;P07225

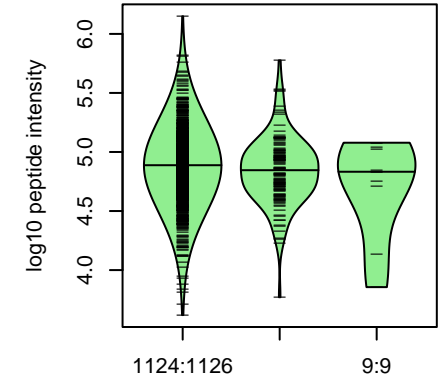

3:93975240:G:A\_A  
p = 0.83, beta = -0.018, N = 1258

**PROS1 : NP4**  
A0A3B3ISJ1;P07225

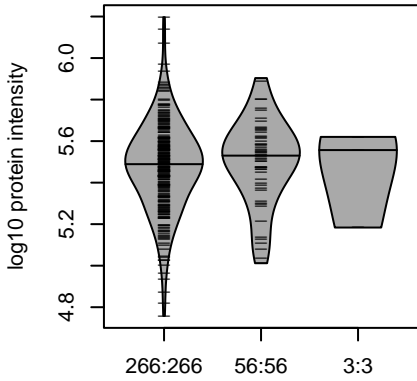

3:93975240:G:A\_A  
p = 0.78, beta = 0.037, N = 325

**IETISHEDLQR pc2**  
A0A3B3ISJ1;G5E9F8;P07225

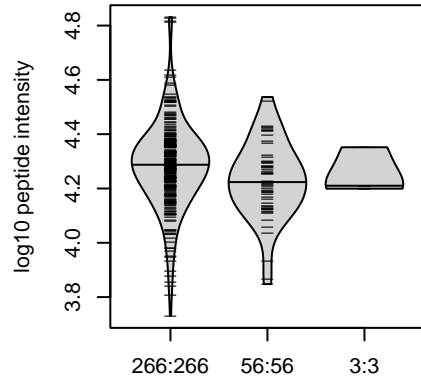

3:93975240:G:A\_A  
p = 0.016, beta = -0.317, N = 325

**IQALS LCS DQ QSHLEFR pc3**  
A0A3B3ISJ1;G5E9F8;P07225

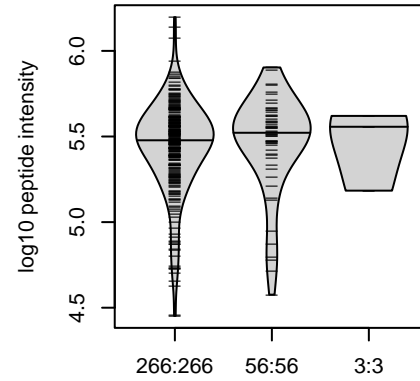

3:93975240:G:A\_A  
p = 0.7, beta = 0.0504, N = 325

**NGFVMSLNK pc2**  
A0A3B3IRK9;A0A3B3ISJ1;P07225

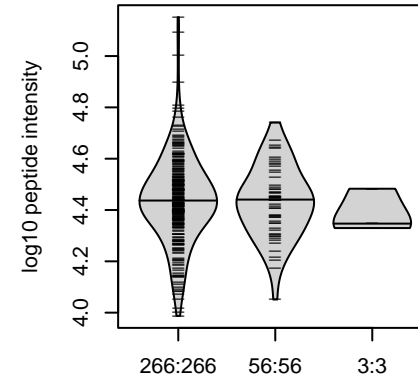

3:93975240:G:A\_A  
p = 0.34, beta = -0.126, N = 325

**NNLELSTPLK pc2**  
A0A3B3ISJ1;G5E9F8;P07225

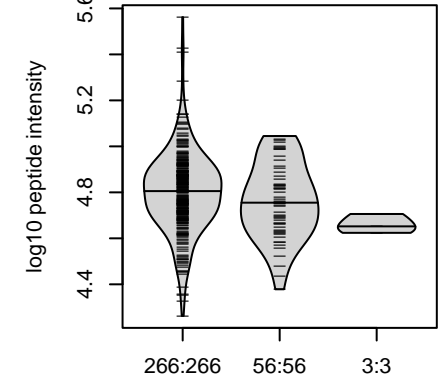

3:93975240:G:A\_A  
p = 0.087, beta = -0.225, N = 325

Assay Target: PROS1  
Olink UniProt: P07225  
deCODE rsID: rs930814  
Proxy rsID: rs7630660  
deCODE: 3:94256084:C:G  
Proxy SNP: 3:93975240:G:A  
deCODE log10(p): 14.5  
deCODE BETA: -0.18  
-----  
1259:1259:1259:1258:1258:125

**METAP1 : NP1  
P53582**

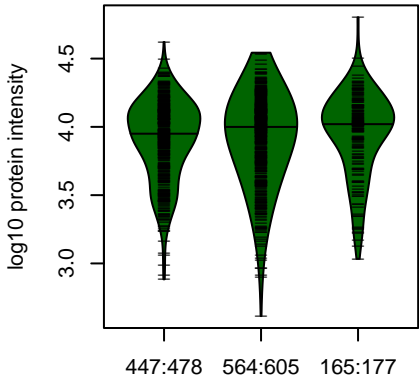

4:99942649:A:G\_A  
p = 0.027, beta = 0.094, N = 1176

**EVL DVAAGMIK pc2  
P53582**

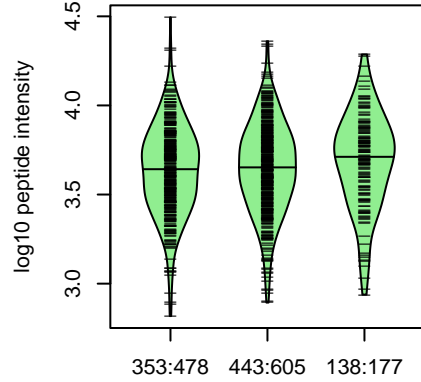

4:99942649:A:G\_A  
p = 0.027, beta = 0.105, N = 934

**SCCTSVNEVICHGIPDR pc3  
P53582**

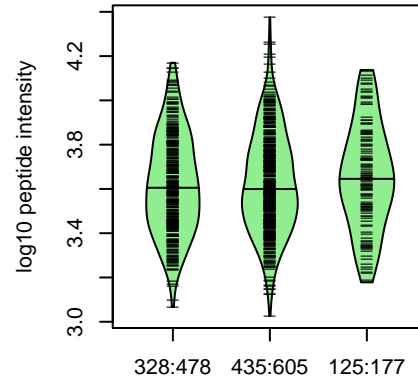

4:99942649:A:G\_A  
p = 0.094, beta = 0.0826, N = 888

**LQCPTCIK pc2  
D6RF24;P53582**

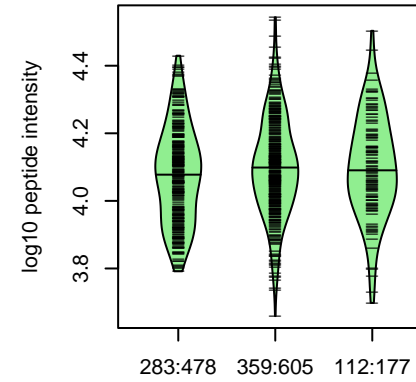

4:99942649:A:G\_A  
p = 0.039, beta = 0.109, N = 754

**LLSSEDIEGMR pc2  
P53582**

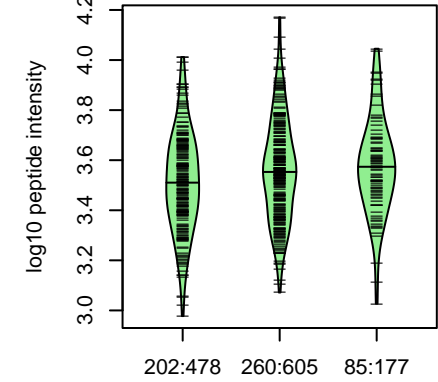

4:99942649:A:G\_A  
p = 0.0011, beta = 0.198, N = 547

**METAP1 : NP1  
P53582**

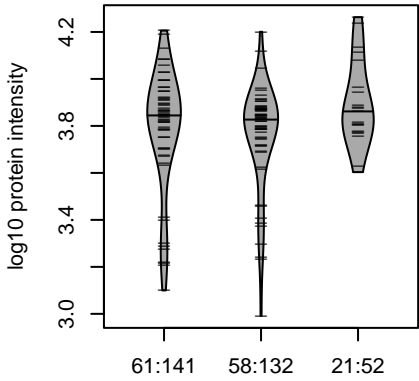

4:99942649:A:G\_A  
p = 0.62, beta = 0.0573, N = 140

**LQCPTCIK pc2  
D6RF24;P53582**

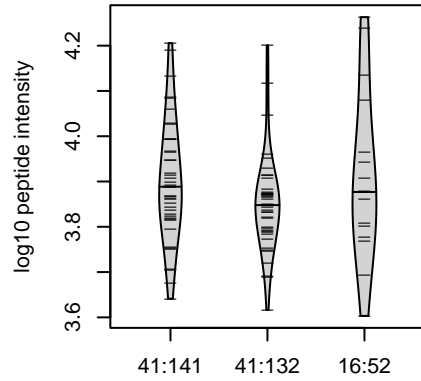

4:99942649:A:G\_A  
p = 0.82, beta = -0.0302, N = 98

**EVL DVAAGMIK pc2  
P53582**

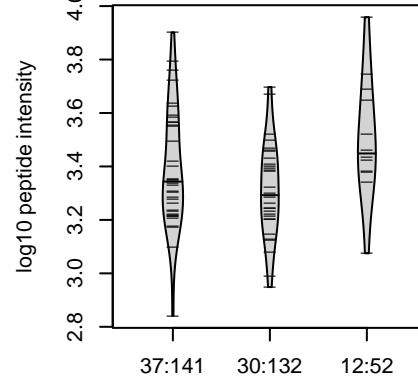

4:99942649:A:G\_A  
p = 0.68, beta = 0.0628, N = 79

**LFHTAPNVPHYAK pc3  
P53582**

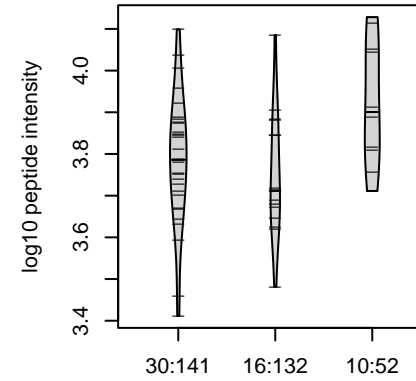

4:99942649:A:G\_A  
p = 0.72, beta = 0.061, N = 56

**SCCTSVNEVICHGIPDR pc3  
P53582**

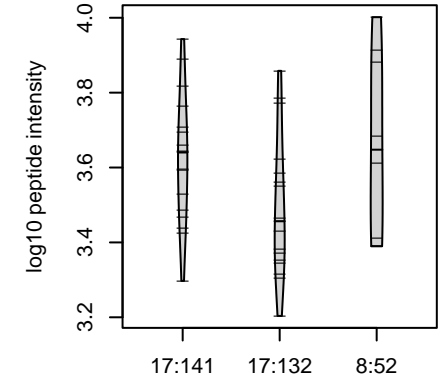

4:99942649:A:G\_A  
p = 0.59, beta = -0.106, N = 42

Assay Target: METAP1  
Olink UniProt: P53582  
deCODE rsID: rs7676259  
Proxy rsID: rs7676259  
deCODE: 4:99021498:A:G  
Proxy SNP: 4:99942649:A:G  
deCODE log10(p): 14.4  
deCODE BETA: 0.06  
-----  
934:888:754:547:531:477:454:4



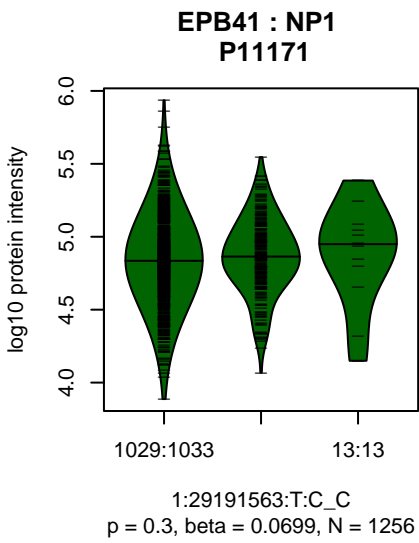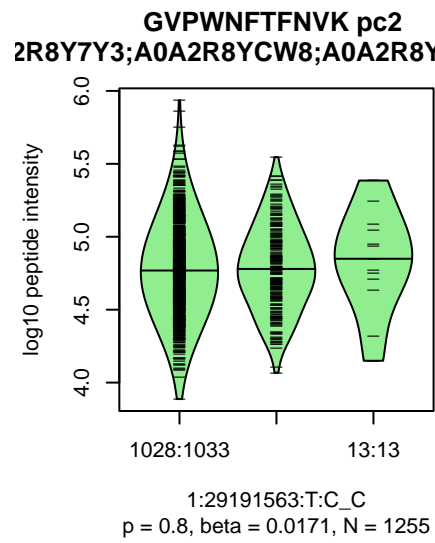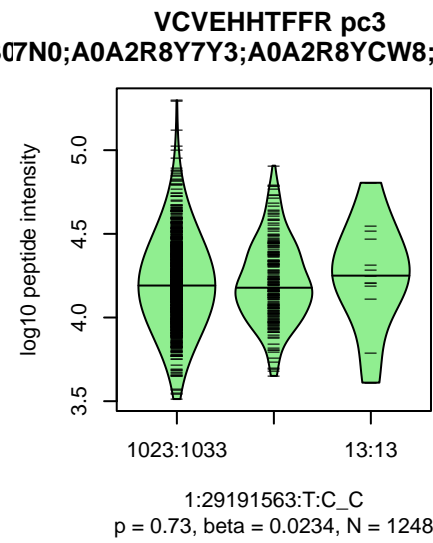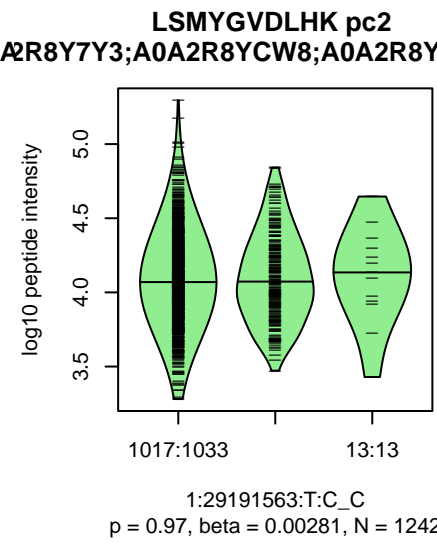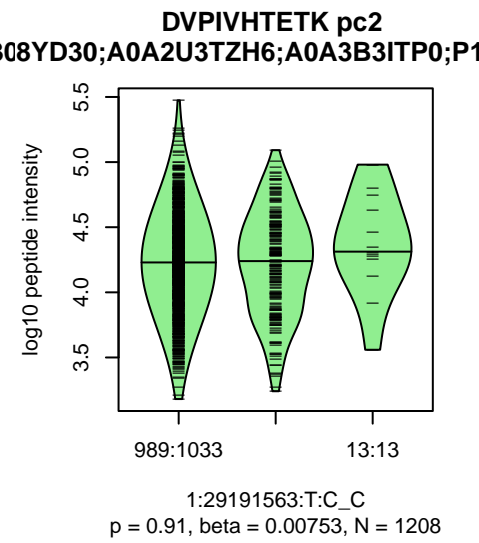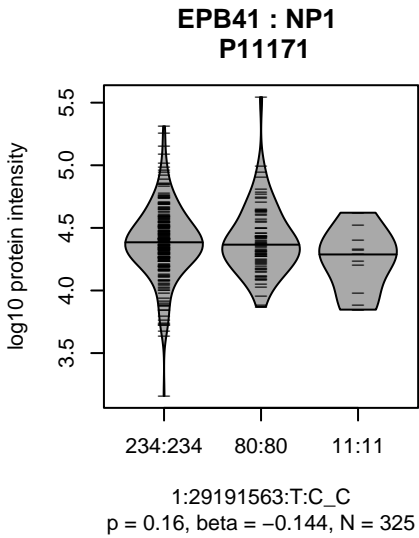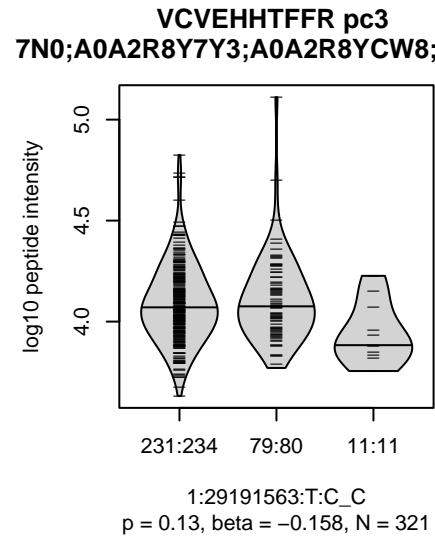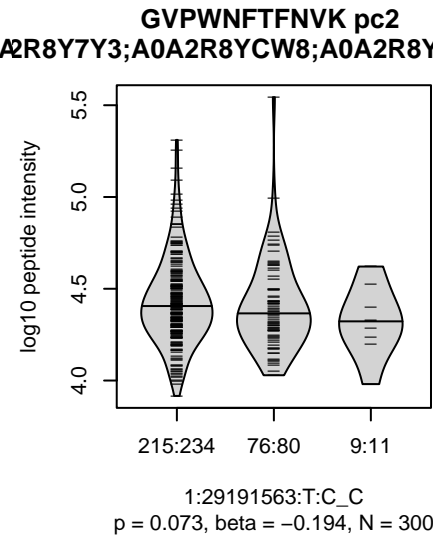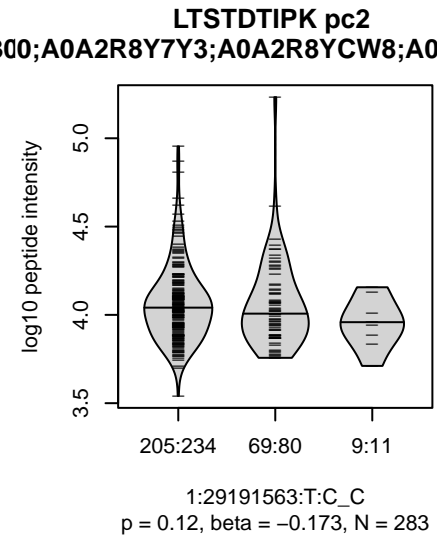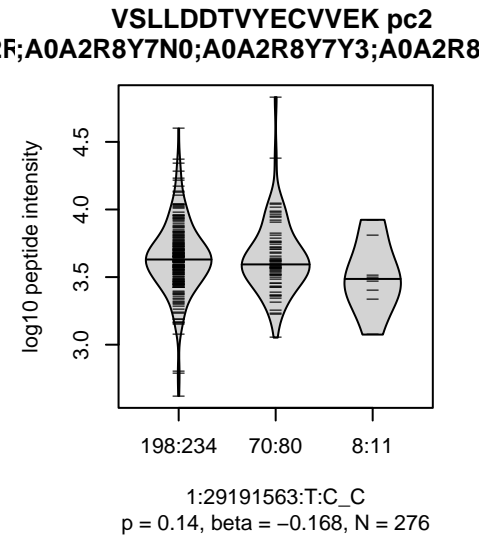

Assay Target: EPB41  
 Olink UniProt: P11171  
 deCODE rsID: rs204074  
 Proxy rsID: rs204074  
 deCODE: 1:28865051:C:T  
 Proxy SNP: 1:29191563:T:C  
 deCODE log<sub>10</sub>(p): 14.2  
 deCODE BETA: -0.1  
 -----  
 1255:1248:1242:1208:1205:120



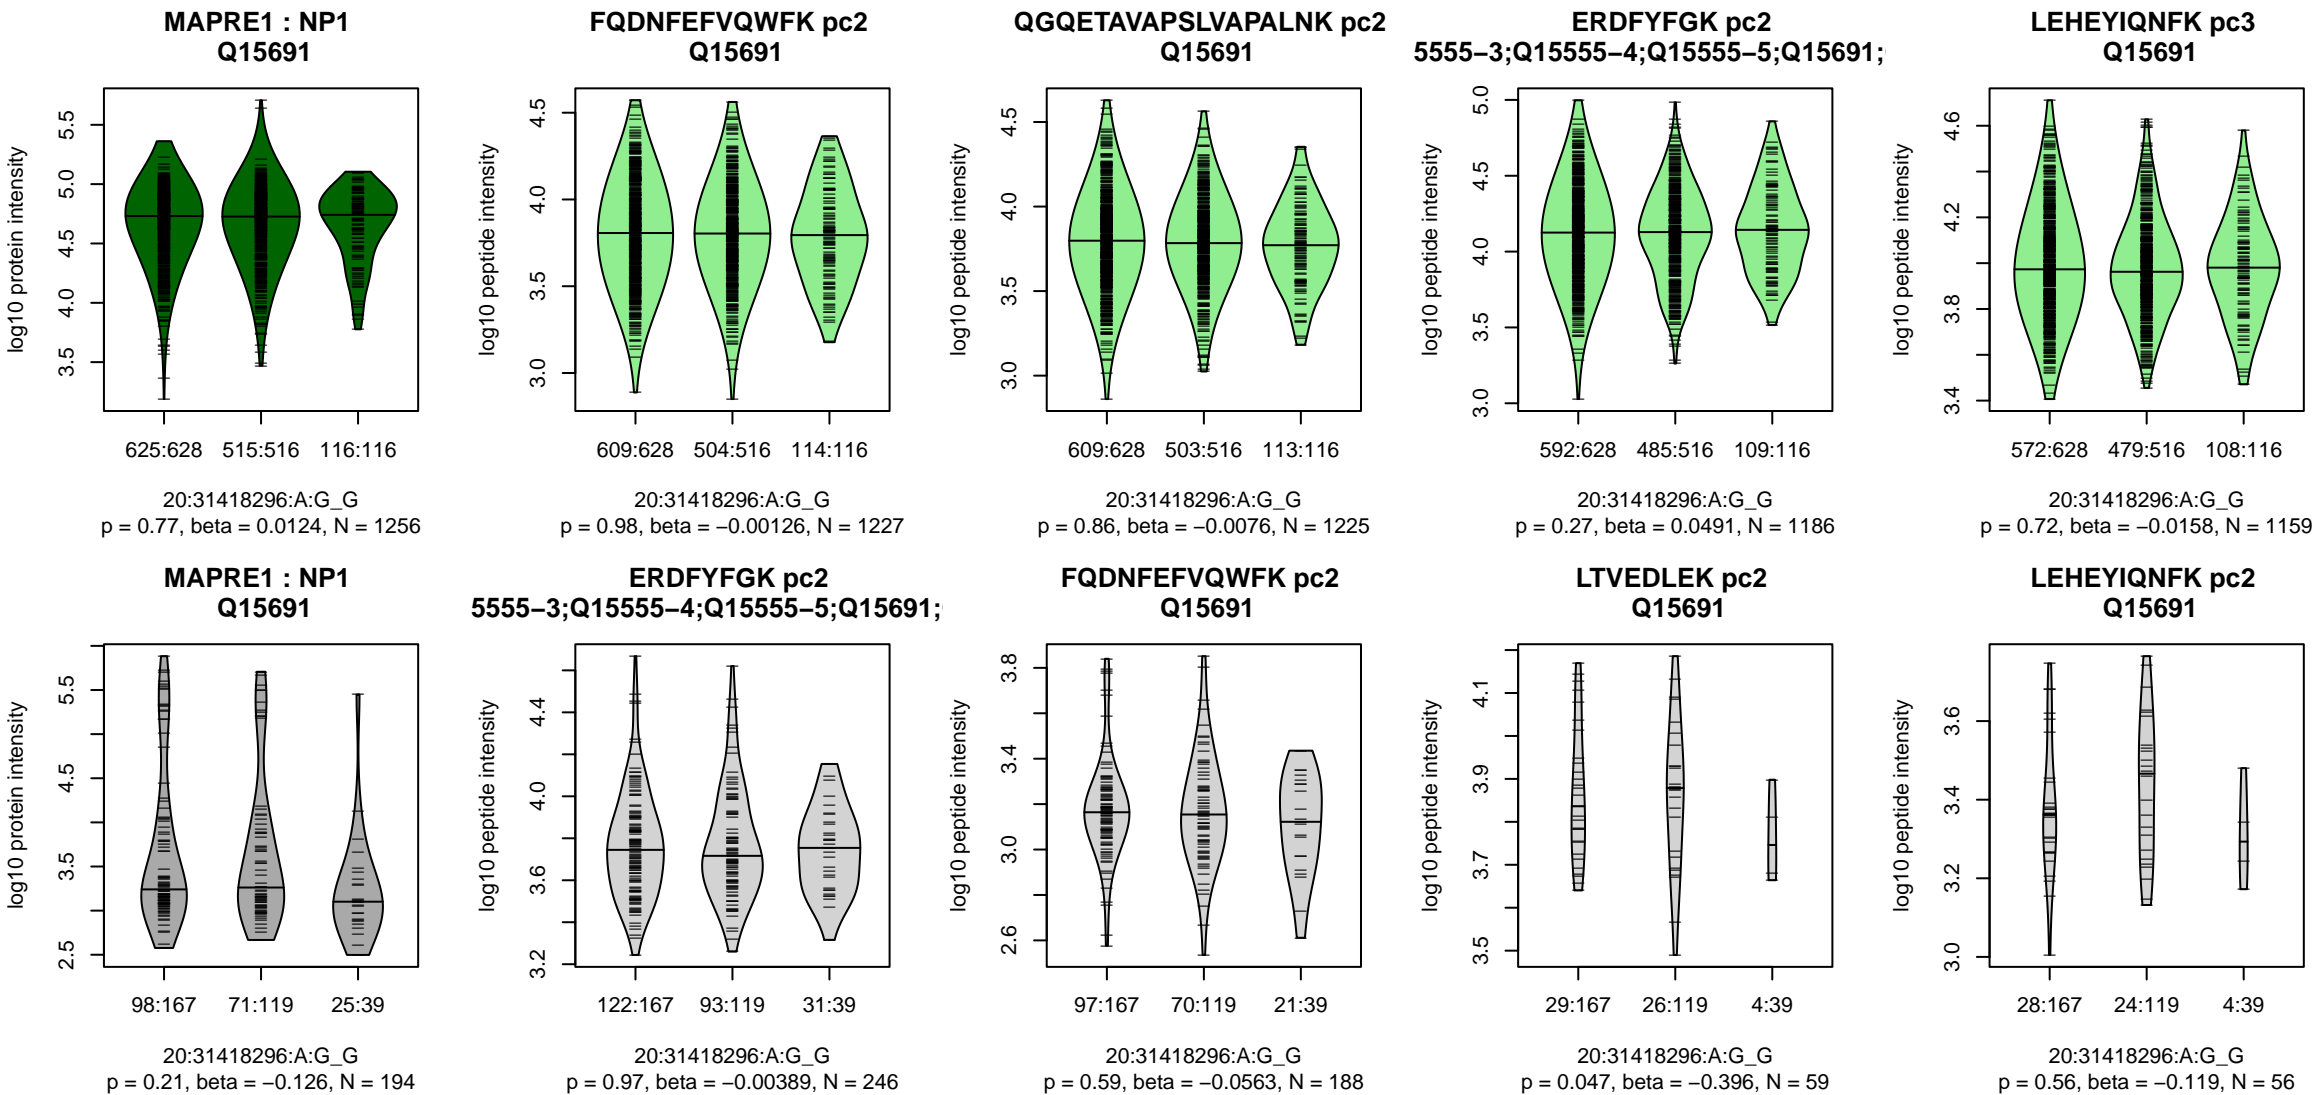

Assay Target: MAPRE1  
 Olink UniProt: Q15691  
 deCODE rsID: rs20654  
 Proxy rsID: rs20654  
 deCODE: 20:32830490:G:A  
 Proxy SNP: 20:31418296:A:G  
 deCODE log<sub>10</sub>(p): 13.4  
 deCODE BETA: -0.07  
 -----NA  
 1227:1225:1186:1159:1142:108

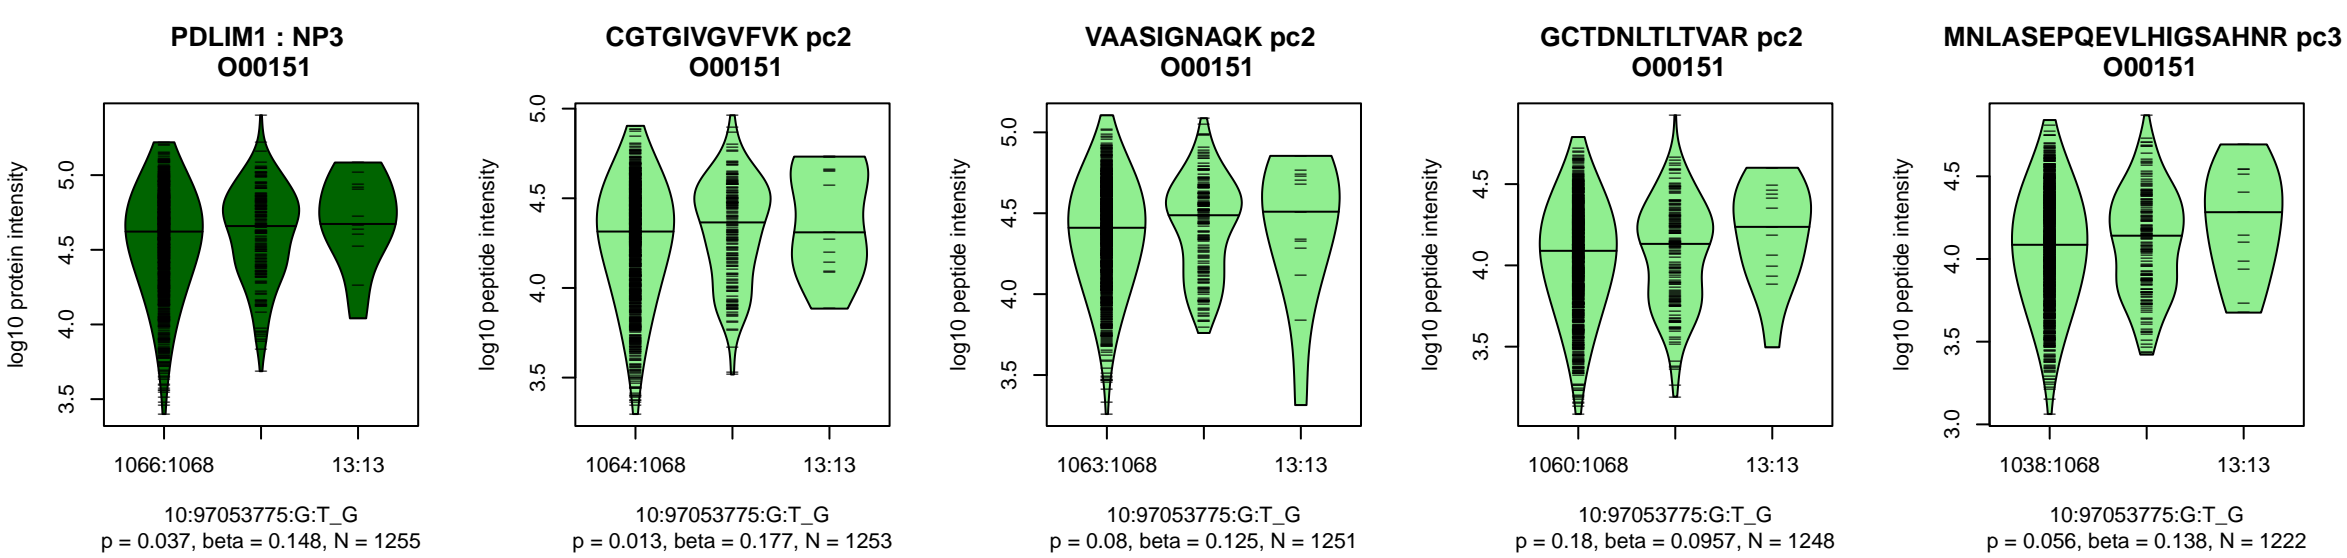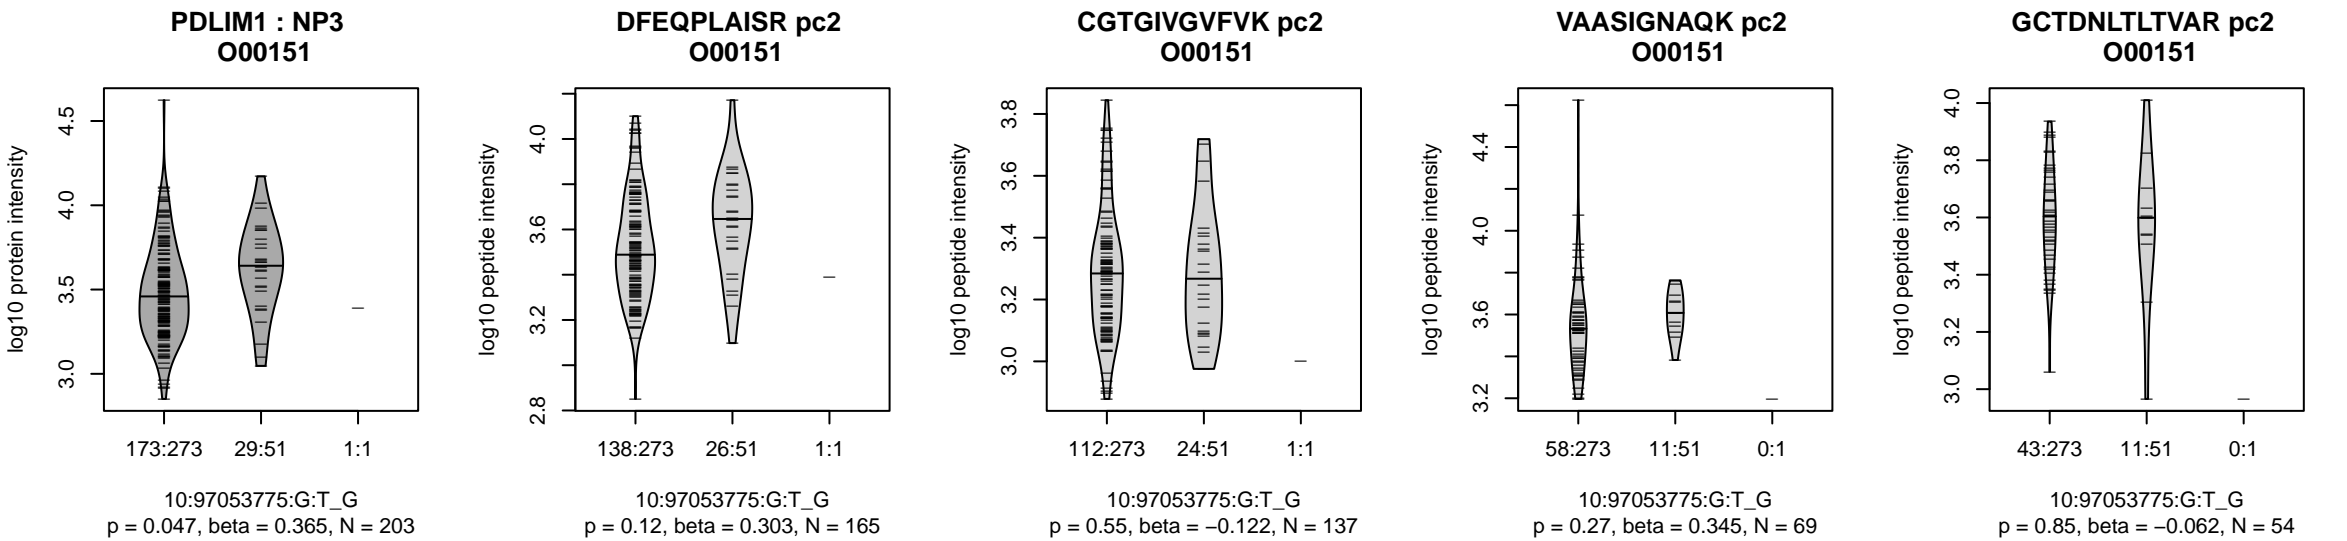

**TAASGVEASSRPLDHAQPPSSLVIDK | TAASGVEANSRPLDHAQPPSSLVIDK |**  
**rs2296961 ALT rs2296961 REF**

Assay Target: PDLIM1  
 Olink UniProt: O00151  
 deCODE rsID: rs1328599  
 Proxy rsID: rs1328599  
 deCODE: 10:95294018:G:T  
 Proxy SNP: 10:97053775:G:T  
 deCODE log10(p): 13.4  
 deCODE BETA: 0.13  
 -----  
 1253:1251:1248:1222:1217:119

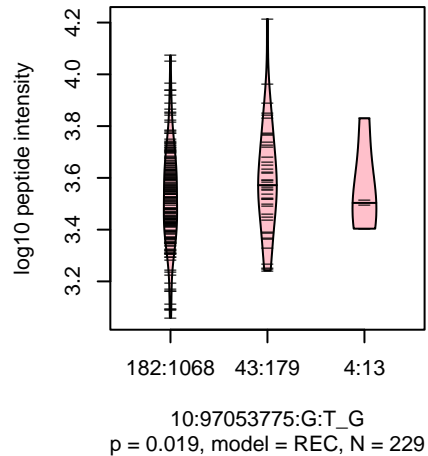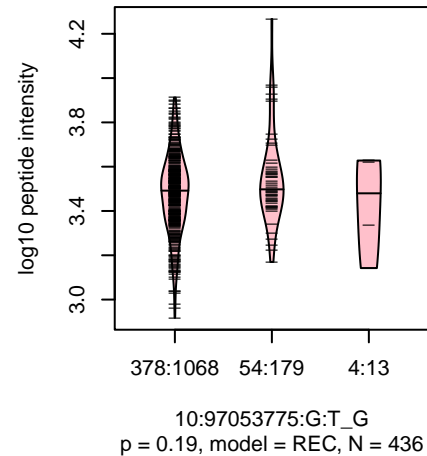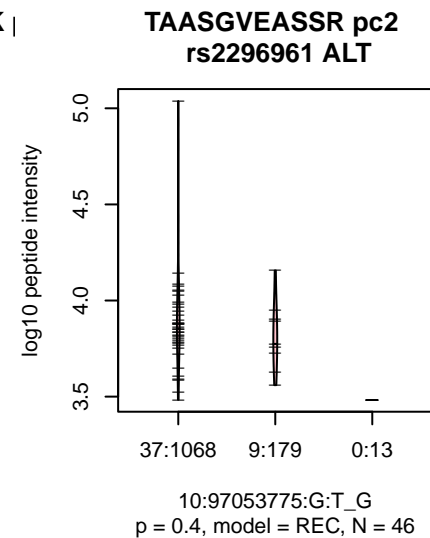

**MANF : NP3**  
**P55145**

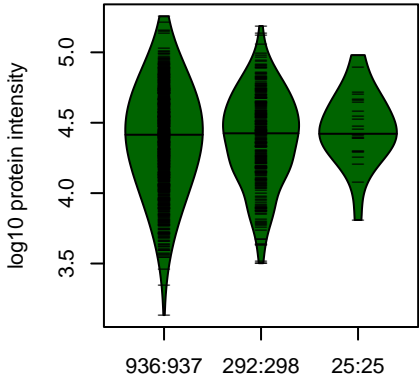

3:51366840:G:A\_G  
p = 0.76, beta = 0.0175, N = 1253

**QIDLSTVDLK pc2**  
**P55145**

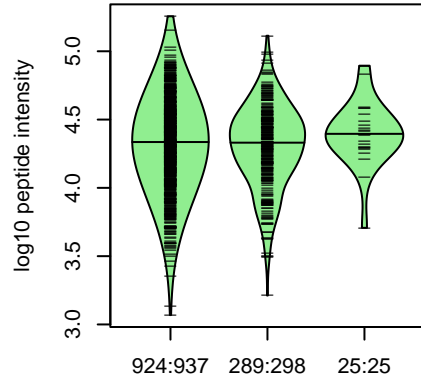

3:51366840:G:A\_G  
p = 0.86, beta = -0.0099, N = 1238

**LCYYIGATDDAATK pc2**  
**P55145**

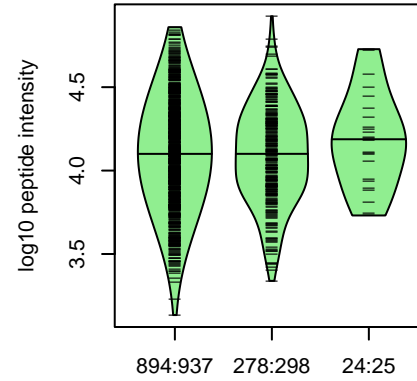

3:51366840:G:A\_G  
p = 0.96, beta = -0.00312, N = 1196

**ILDDWGETCK pc2**  
**P55145**

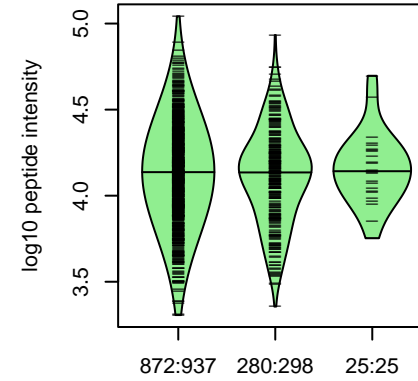

3:51366840:G:A\_G  
p = 0.51, beta = -0.0388, N = 1177

**INELMPK pc2**  
**P55145**

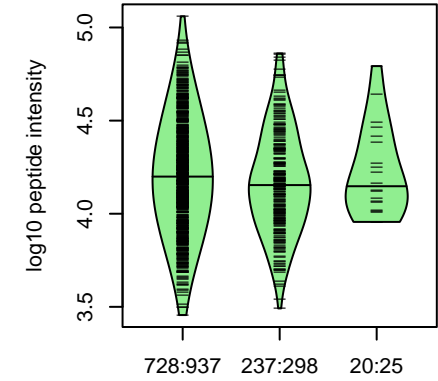

3:51366840:G:A\_G  
p = 0.32, beta = -0.0643, N = 985

**MANF : NP3**  
**P55145**

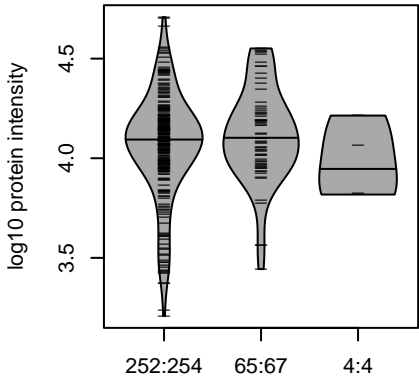

3:51366840:G:A\_G  
p = 0.39, beta = 0.105, N = 321

**QIDLSTVDLK pc2**  
**P55145**

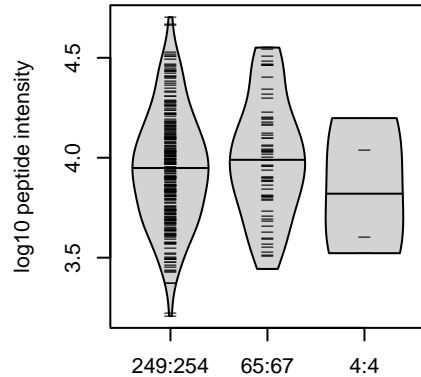

3:51366840:G:A\_G  
p = 0.55, beta = 0.0742, N = 318

**ILDDWGETCK pc2**  
**P55145**

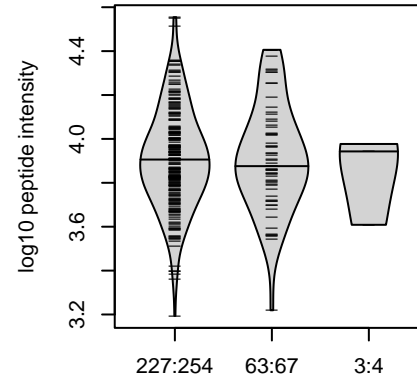

3:51366840:G:A\_G  
p = 0.91, beta = 0.014, N = 293

**INELMPK pc2**  
**P55145**

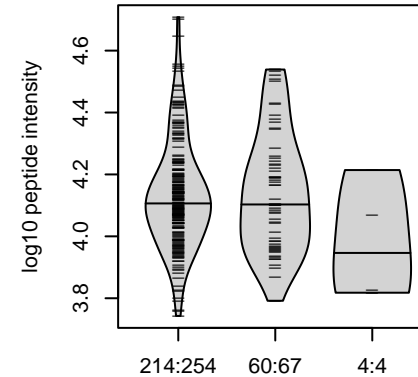

3:51366840:G:A\_G  
p = 0.56, beta = -0.0739, N = 278

**LCYYIGATDDAATK pc2**  
**P55145**

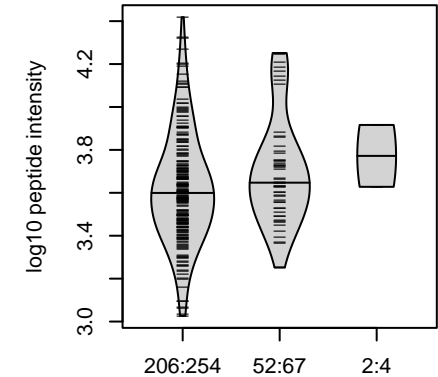

3:51366840:G:A\_G  
p = 0.027, beta = 0.314, N = 260

Assay Target: MANF  
Olink UniProt: P55145  
deCODE rsID: rs1383251  
Proxy rsID: rs1383251  
deCODE: 3:51329409:G:A  
Proxy SNP: 3:51366840:G:A  
deCODE log10(p): 12.5  
deCODE BETA: -0.09  
-----:NA  
1238:1196:1177:985:764:558:54

**COL3A1 : NP1**  
**P02461**

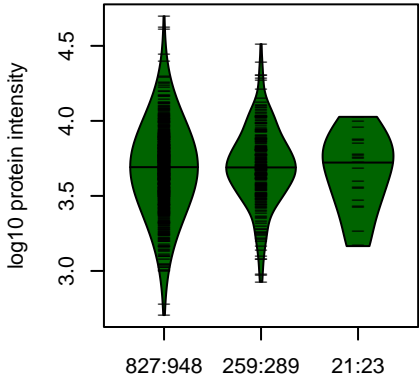

2:190241743:C:T\_T  
p = 0.45, beta = 0.0467, N = 1107

**GPVGPSGPPGK pc2**  
**P02461**

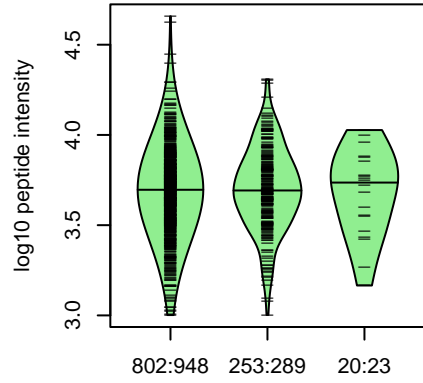

2:190241743:C:T\_T  
p = 0.46, beta = 0.0459, N = 1075

**PPNGQGQGPK pc2**  
**P02461;P02461-2**

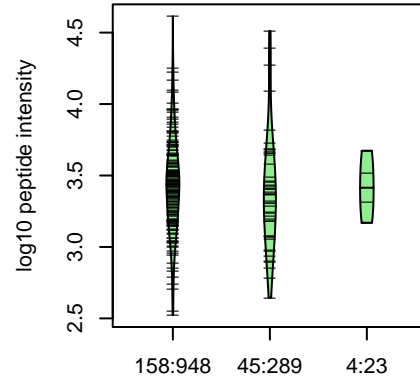

2:190241743:C:T\_T  
p = 0.5, beta = -0.0972, N = 207

**FTYTVLEDGCTK pc2**  
**P02461;P02461-2**

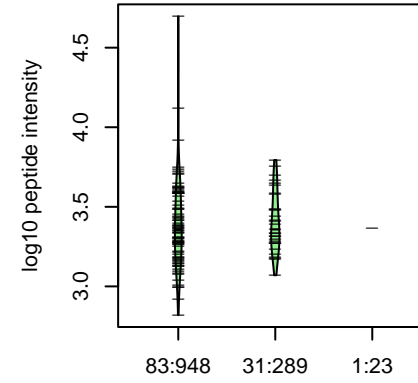

2:190241743:C:T\_T  
p = 0.43, beta = 0.154, N = 115

**INTDEIMTSLK pc2**  
**P02461;P02461-2**

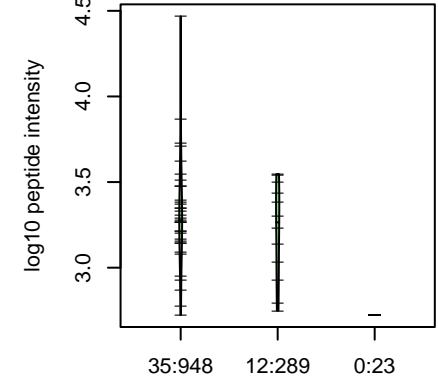

2:190241743:C:T\_T  
p = 0.97, beta = -0.0103, N = 47

**COL3A1 : NP1**  
**P02461**

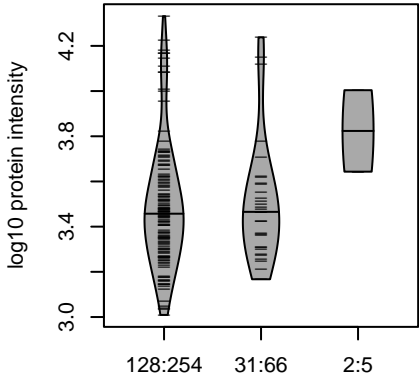

2:190241743:C:T\_T  
p = 0.17, beta = 0.241, N = 161

**GGLGSPGPKGDK pc2**  
**P02461;P02461-2**

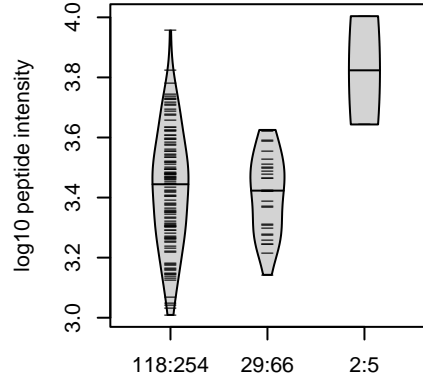

2:190241743:C:T\_T  
p = 0.43, beta = 0.141, N = 149

**GPVGPSGPPGK pc2**  
**P02461**

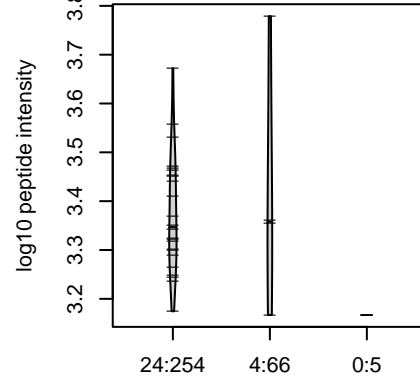

2:190241743:C:T\_T  
p = 0.34, beta = 0.476, N = 28

Assay Target: COL3A1  
Olink UniProt: P02461  
deCODE rsID: rs72914144  
Proxy rsID: rs72914144  
deCODE: 2:189377017:T:C  
Proxy SNP: 2:190241743:C:T  
deCODE log10(p): 11.9  
deCODE BETA: 0.08  
-:-:-:-:NA:NA:NA  
1075:207:115:47:26:6:8:11



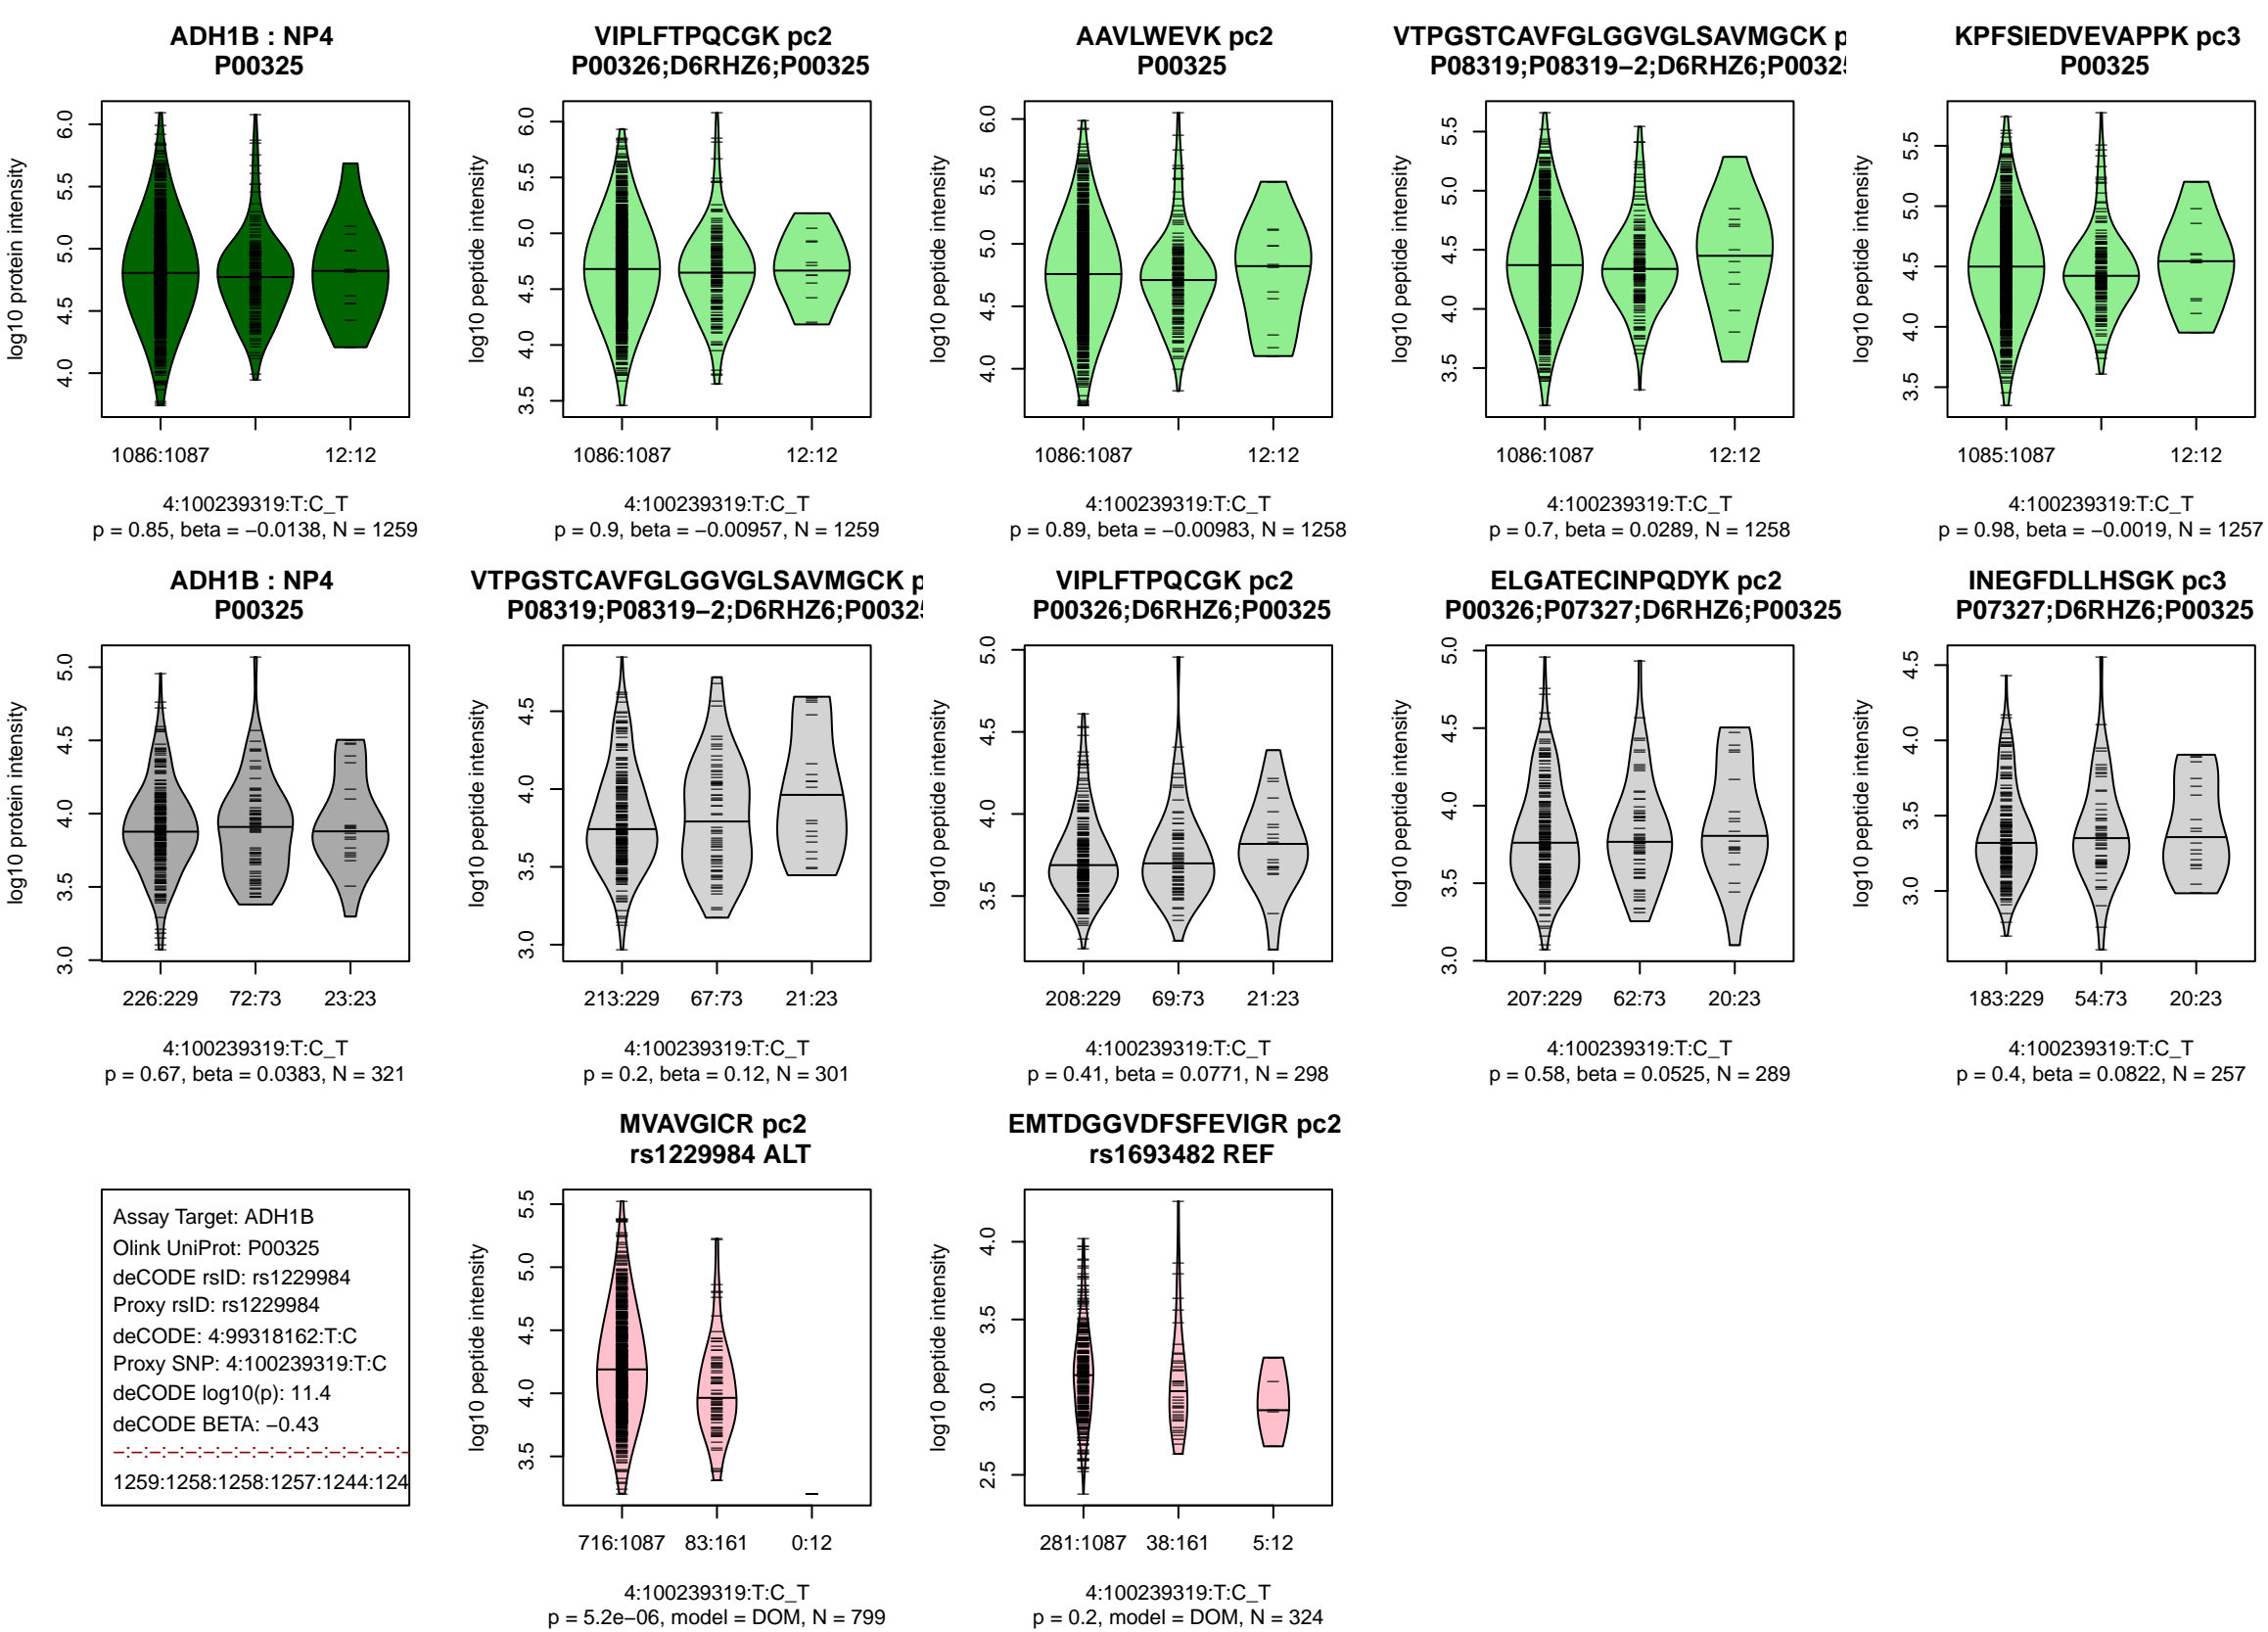



**IGFBP4 : NP4  
P22692**

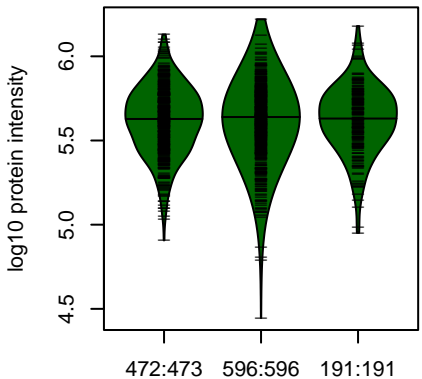

17:38603549:A:G\_G  
p = 0.81, beta = 0.00958, N = 1259

**GELDCHQLADSFRE pc3  
P22692**

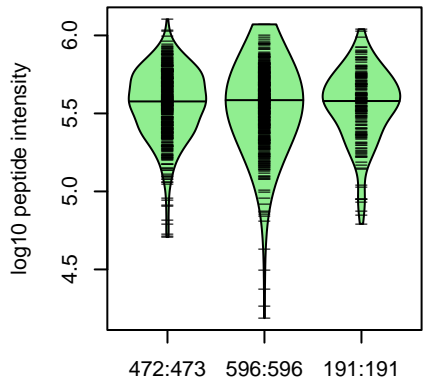

17:38603549:A:G\_G  
p = 0.76, beta = -0.0127, N = 1259

**LPGGLEPK pc2  
P22692**

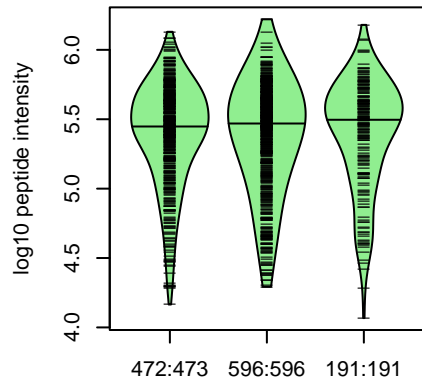

17:38603549:A:G\_G  
p = 0.79, beta = 0.0107, N = 1259

**EDARPVPQGSCQSELHR pc3  
P22692**

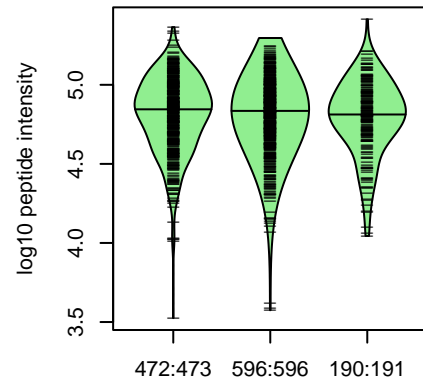

17:38603549:A:G\_G  
p = 0.46, beta = -0.0303, N = 1258

**CRPPVGCEELVR pc3  
P22692**

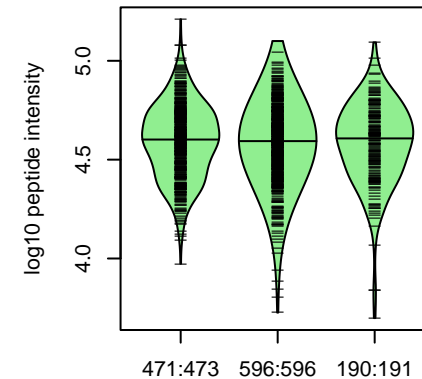

17:38603549:A:G\_G  
p = 0.87, beta = -0.00668, N = 1257

**IGFBP4 : NP4  
P22692**

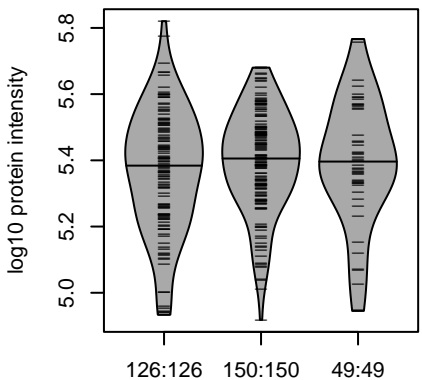

17:38603549:A:G\_G  
p = 0.37, beta = 0.0701, N = 325

**EDARPVPQGSCQSELHR pc3  
P22692**

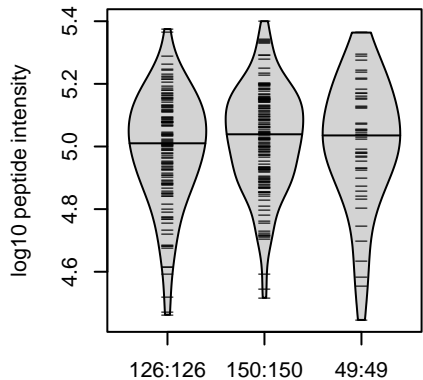

17:38603549:A:G\_G  
p = 0.44, beta = 0.0616, N = 325

**GELDCHQLADSFRE pc3  
P22692**

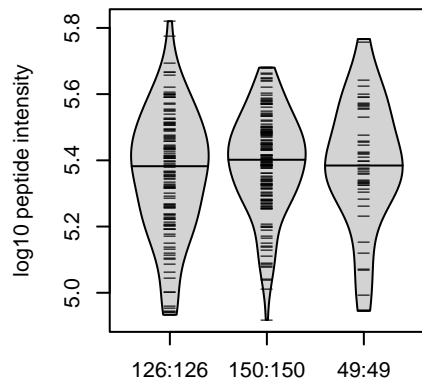

17:38603549:A:G\_G  
p = 0.35, beta = 0.0742, N = 325

**QCHPALDGQR pc2  
P22692**

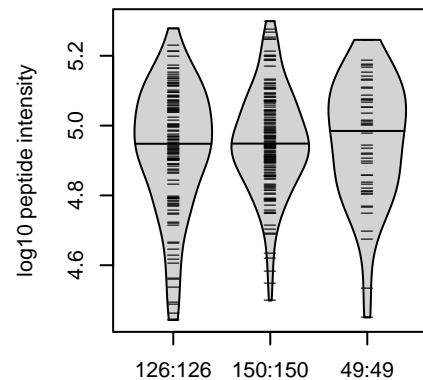

17:38603549:A:G\_G  
p = 0.53, beta = 0.0492, N = 325

**CRPPVGCEELVR pc3  
P22692**

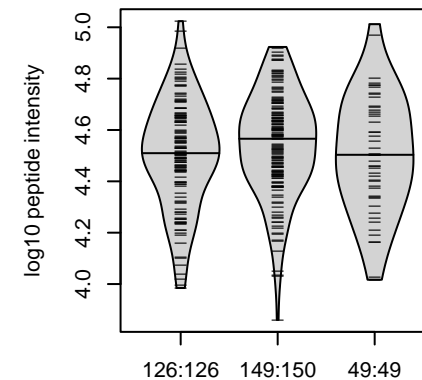

17:38603549:A:G\_G  
p = 0.65, beta = 0.0354, N = 324

Assay Target: IGFBP4  
Olink UniProt: P22692  
deCODE rsID: rs4890114  
Proxy rsID: rs4890114  
deCODE: 17:40447297:G:A  
Proxy SNP: 17:38603549:A:G  
deCODE log10(p): 11.3  
deCODE BETA: 0.06  
-----  
1259:1259:1258:1257:1256:125

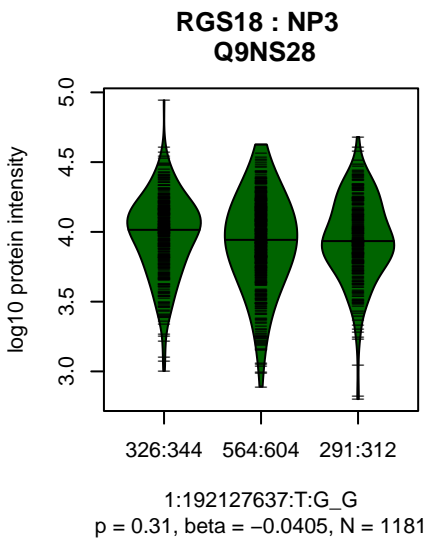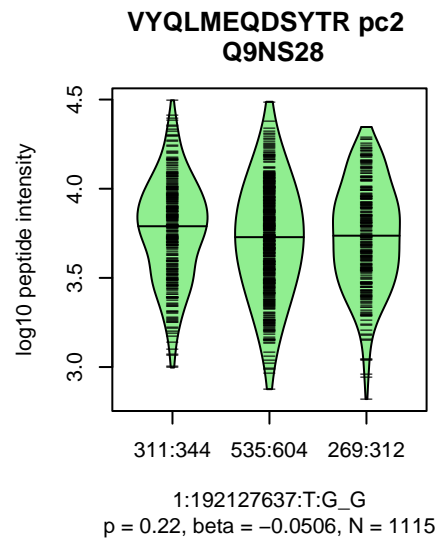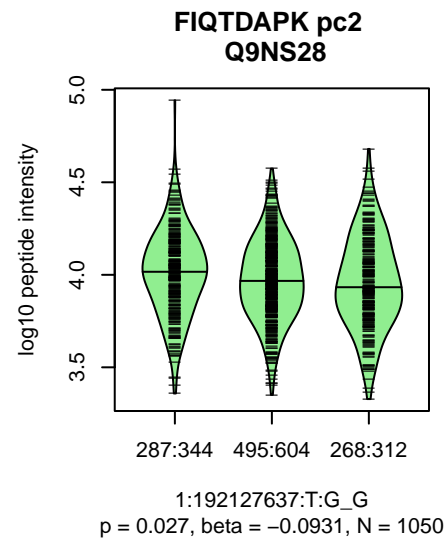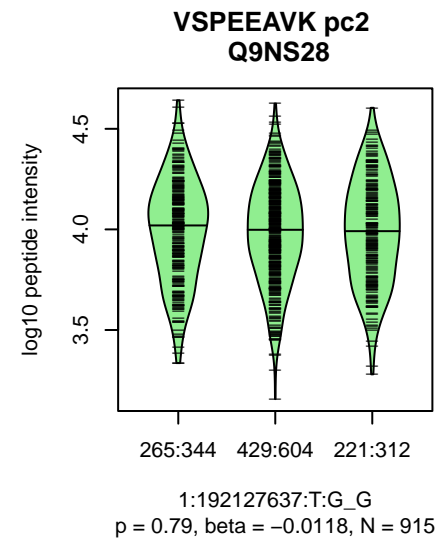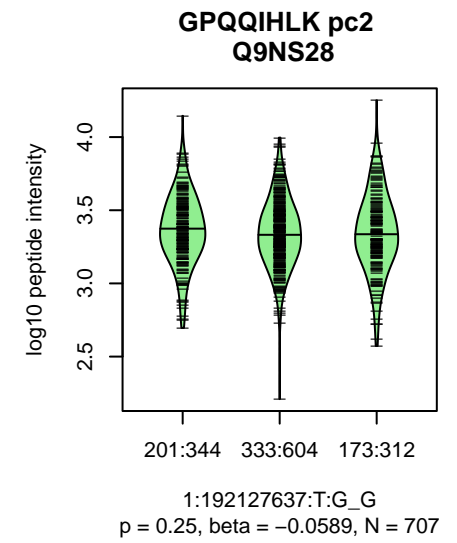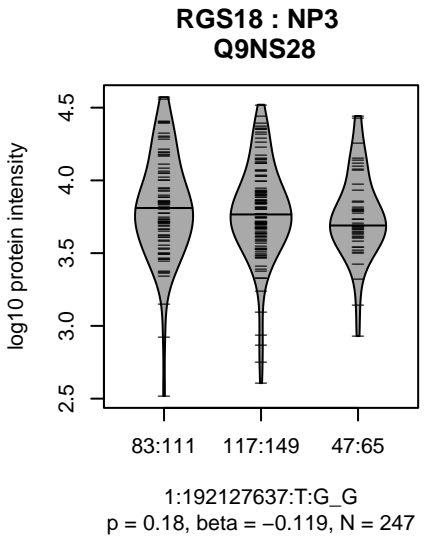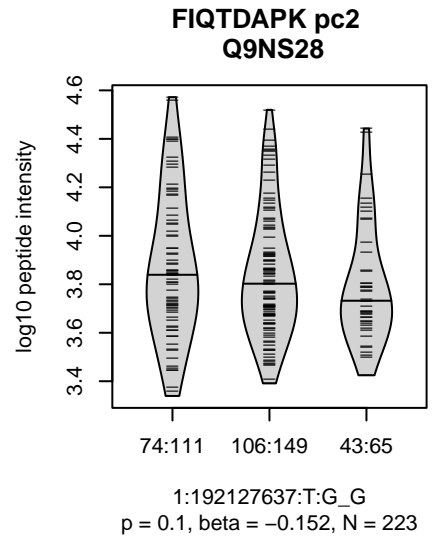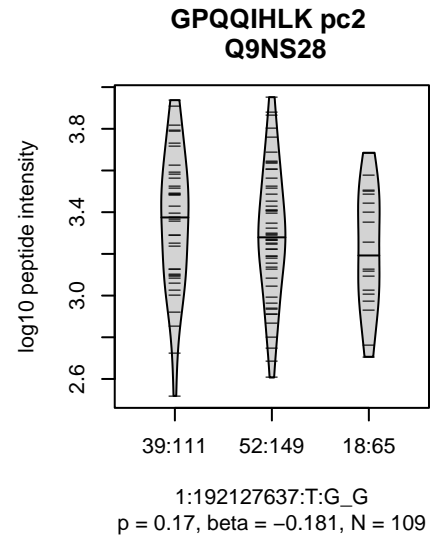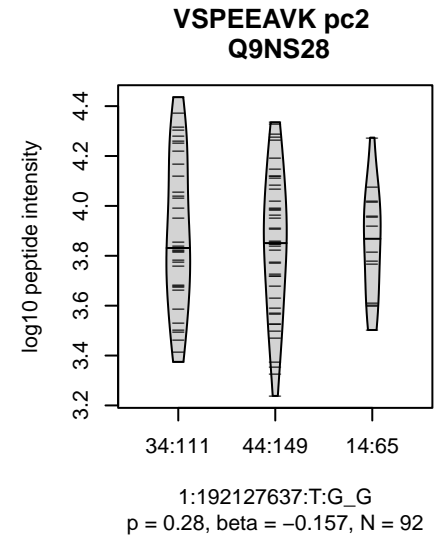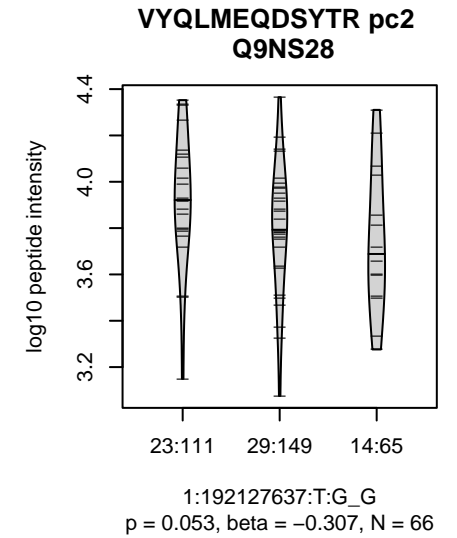

Assay Target: RGS18  
 Olink UniProt: Q9NS28  
 deCODE rsID: rs4495675  
 Proxy rsID: rs4495675  
 deCODE: 1:192158507:T:G  
 Proxy SNP: 1:192127637:T:G  
 deCODE log10(p): 11.1  
 deCODE BETA: 0.06  
 -----  
 1115:1050:915:707:467:344:307

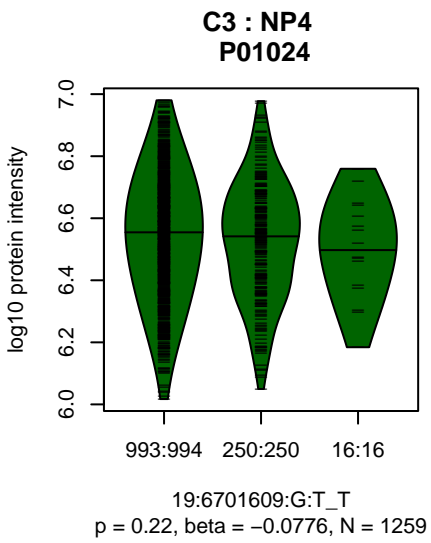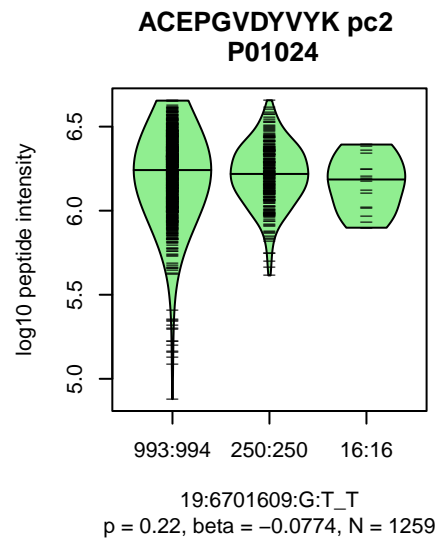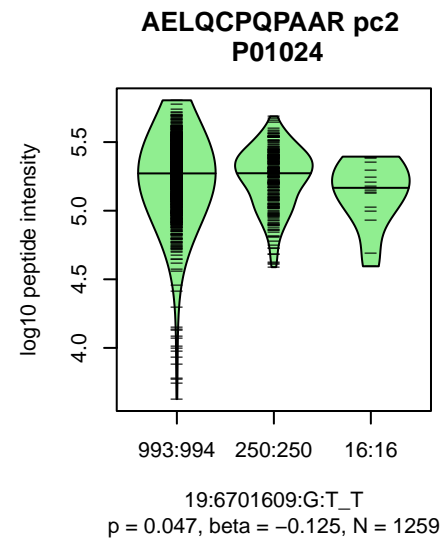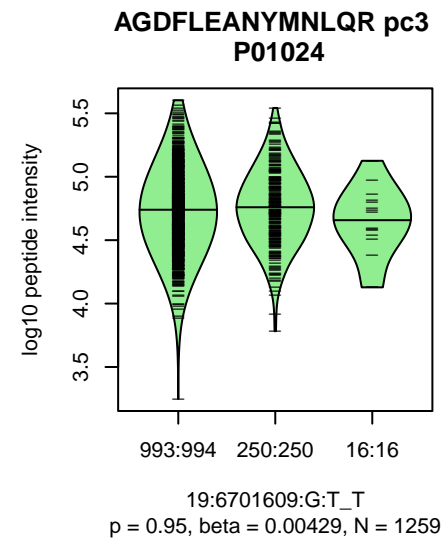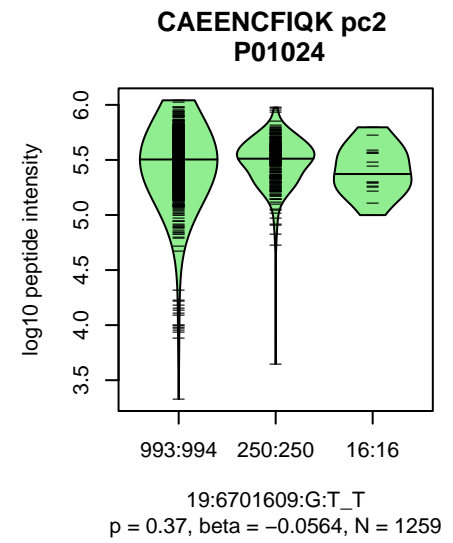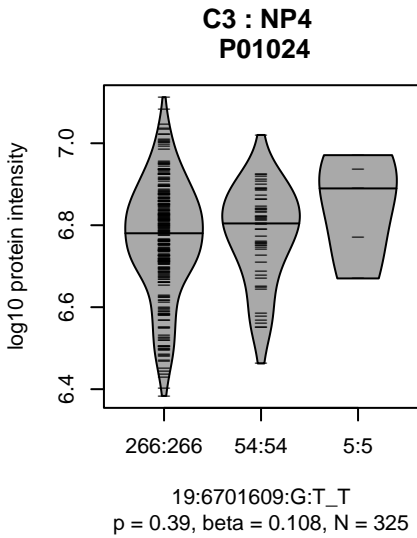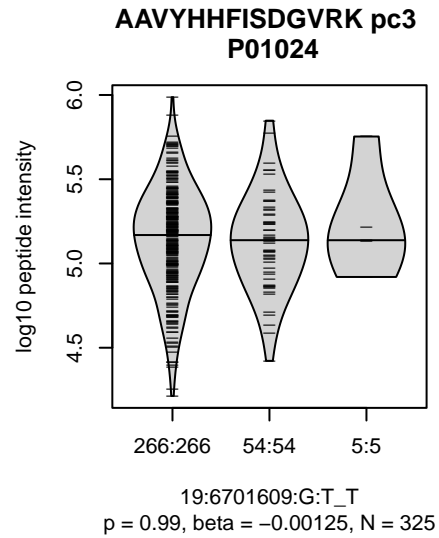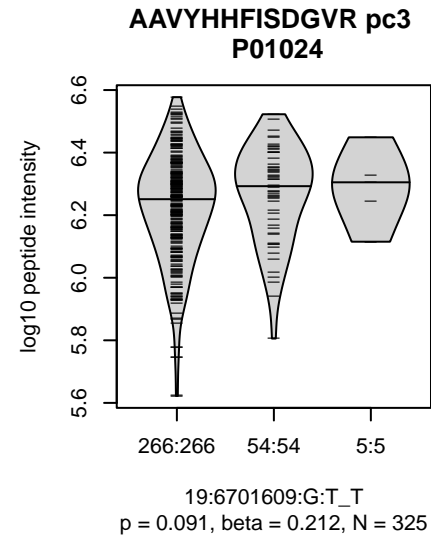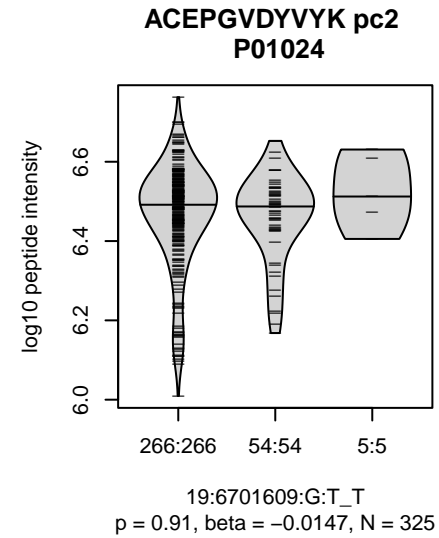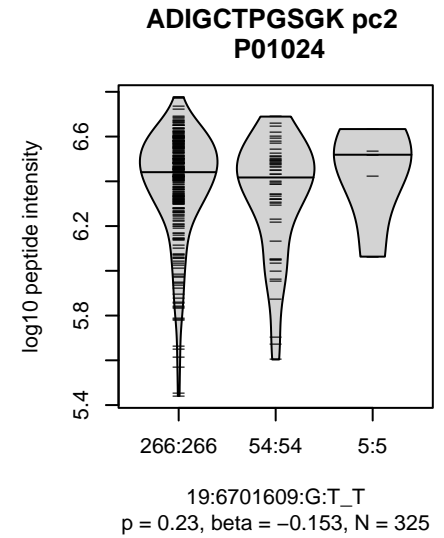

Assay Target: C3  
 Olink UniProt: P01024  
 deCODE rsID: rs11569466  
 Proxy rsID: rs11569466  
 deCODE: 19:6701598:T:!  
 Proxy SNP: 19:6701609:G:T  
 deCODE log<sub>10</sub>(p): 11.1  
 deCODE BETA: -0.08  
 -----\*  
 1259:1259:1259:1259:1259:125

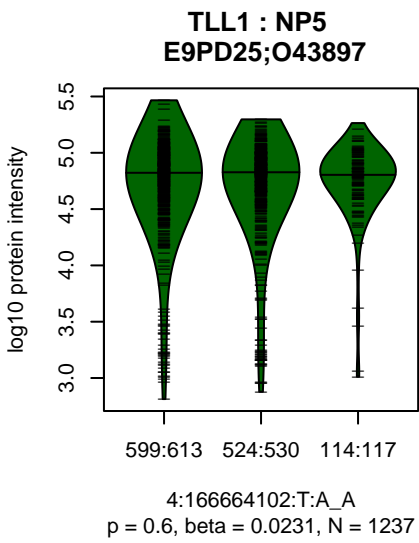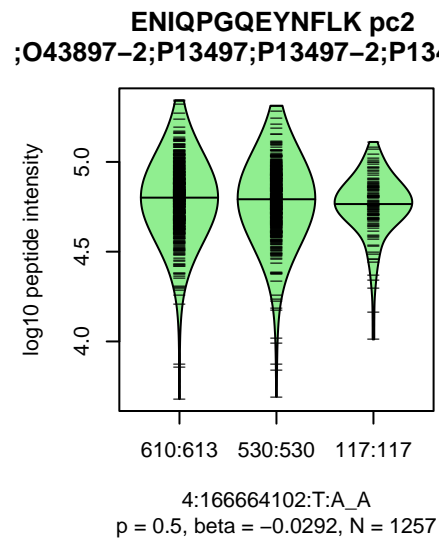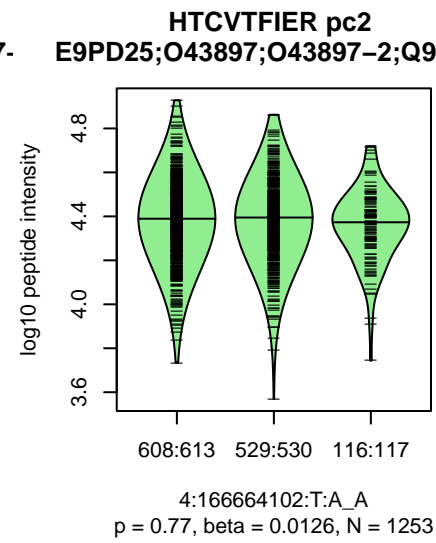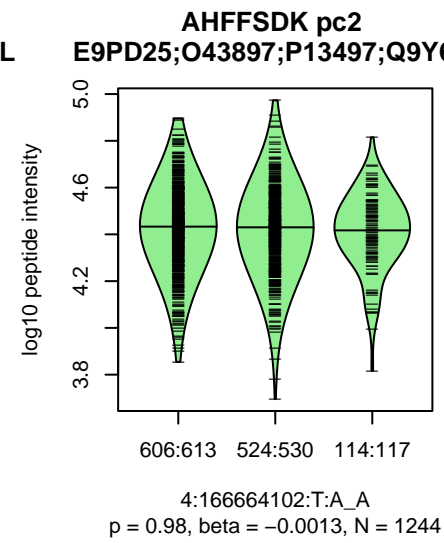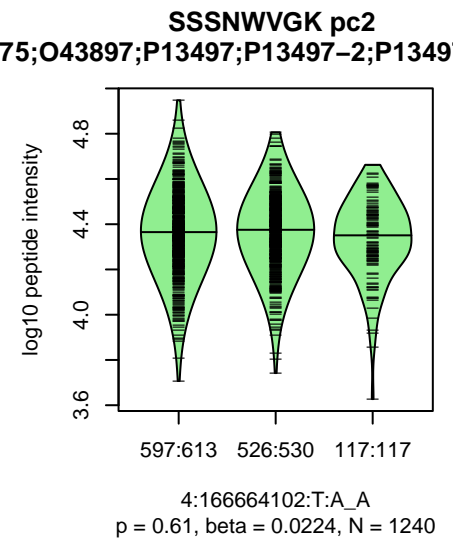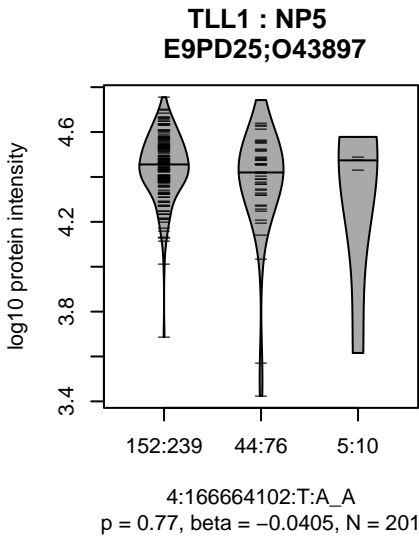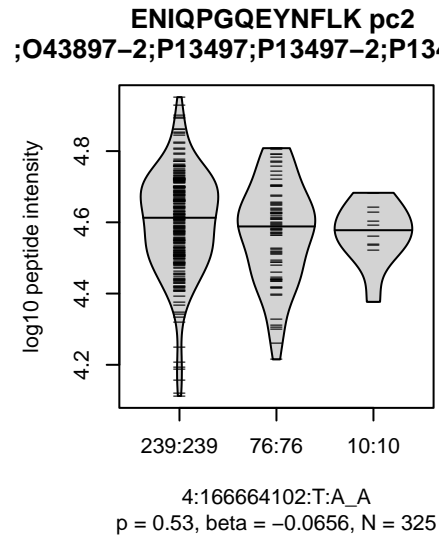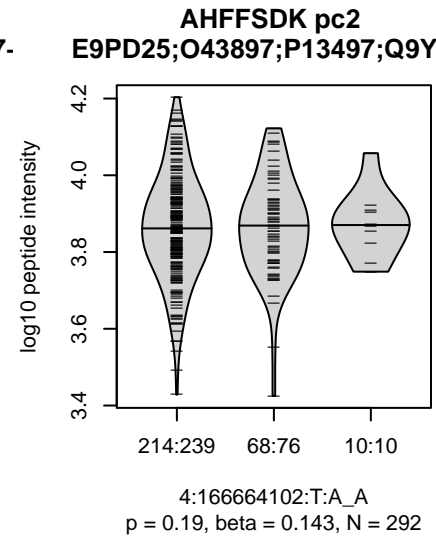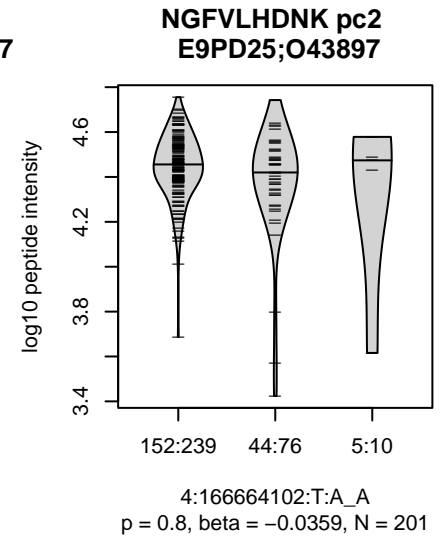

Assay Target: TLL1  
 Olink UniProt: O43897  
 deCODE rsID: rs1903176  
 Proxy rsID: rs1903176  
 deCODE: 4:165742950:A:T  
 Proxy SNP: 4:166664102:T:A  
 deCODE log10(p): 10.9  
 deCODE BETA: -0.06  
 -----  
 1257:1253:1244:1240:1157:716

**CLINT1 : NP3**  
**Q14677**

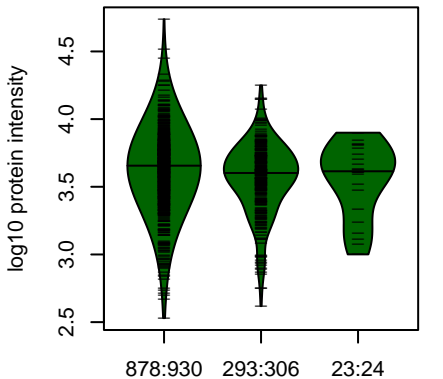

5:157290951:C:T\_T  
p = 0.00087, beta = -0.195, N = 1194

**SLLLLAYLIR pc2**  
**Q14677-2;Q14677;Q14677-3**

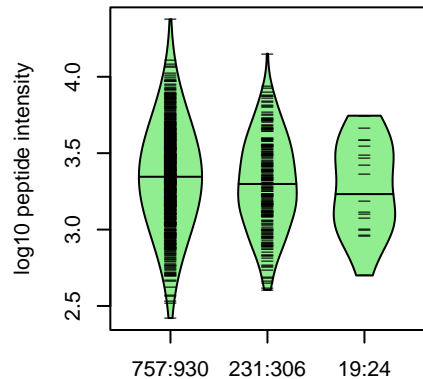

5:157290951:C:T\_T  
p = 0.041, beta = -0.132, N = 1007

**YGVSSDSVGGFR pc2**  
**Q14677-2;Q14677;Q14677-3**

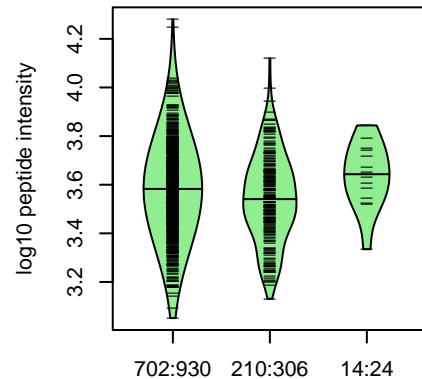

5:157290951:C:T\_T  
p = 0.051, beta = -0.136, N = 926

**IGSTIDDTISK pc2**  
**Q14677-2;Q14677;Q14677-3**

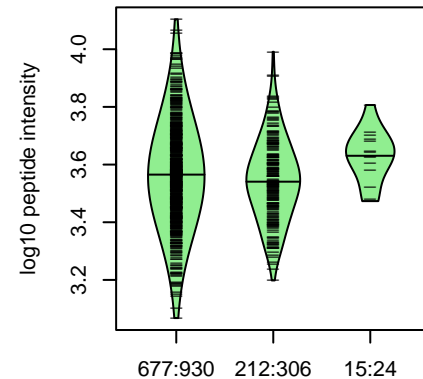

5:157290951:C:T\_T  
p = 0.57, beta = -0.0396, N = 904

**ATNVVMNYSEIESK pc2**  
**Q14677;Q14677-3**

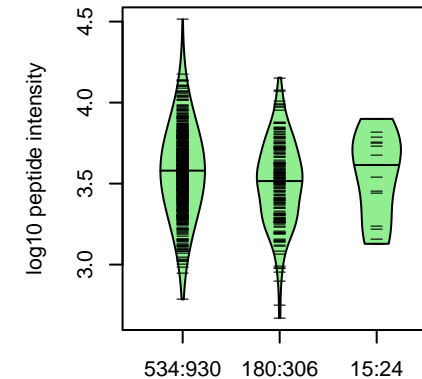

5:157290951:C:T\_T  
p = 0.0068, beta = -0.2, N = 729

**CLINT1 : NP3**  
**Q14677-3**

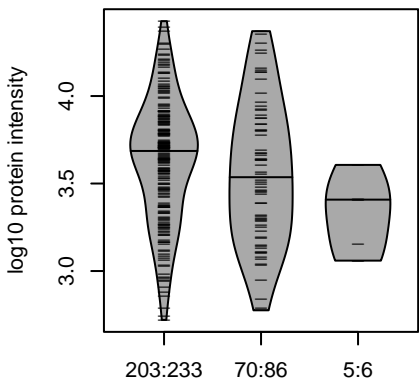

5:157290951:C:T\_T  
p = 0.18, beta = -0.161, N = 278

**ATNVVMNYSEIESK pc2**  
**Q14677;Q14677-3**

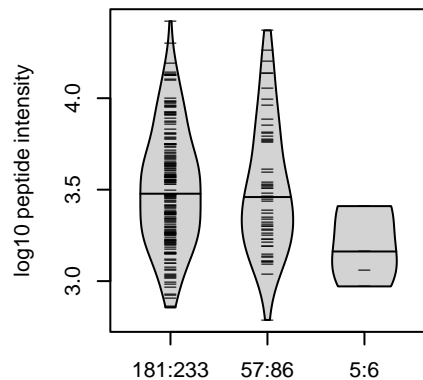

5:157290951:C:T\_T  
p = 0.35, beta = -0.119, N = 243

**SLLLLAYLIR pc2**  
**Q14677-2;Q14677;Q14677-3**

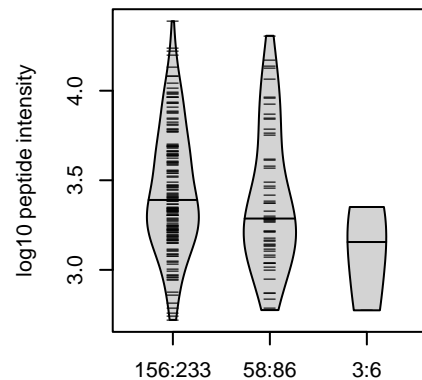

5:157290951:C:T\_T  
p = 0.28, beta = -0.147, N = 217

**SLENYHFVDEHGK pc3**  
**Q14677-2;Q14677;Q14677-3**

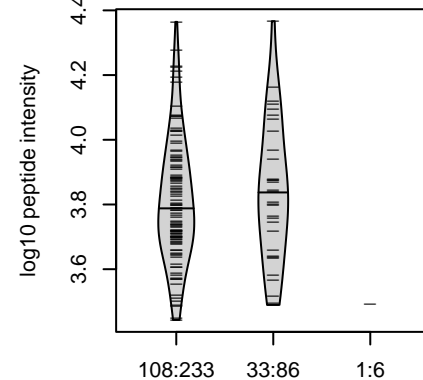

5:157290951:C:T\_T  
p = 0.64, beta = 0.0862, N = 142

**YGVSSDSVGGFR pc2**  
**Q14677-2;Q14677;Q14677-3**

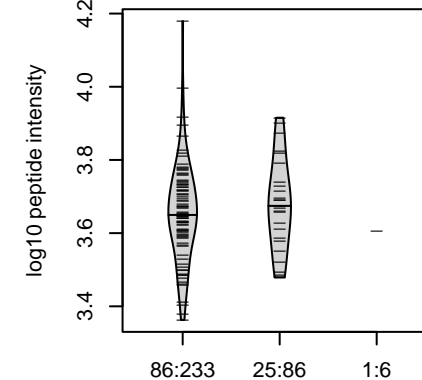

5:157290951:C:T\_T  
p = 0.4, beta = 0.175, N = 112

Assay Target: CLINT1  
Olink UniProt: Q14677  
deCODE rsID: rs62389053  
Proxy rsID: rs62389053  
deCODE: 5:157863943:T:C  
Proxy SNP: 5:157290951:C:T  
deCODE log10(p): 10.7  
deCODE BETA: -0.08  
-----\*-----  
1007:926:904:729:654:413:280:

**LGALS4 : NP3  
P56470**

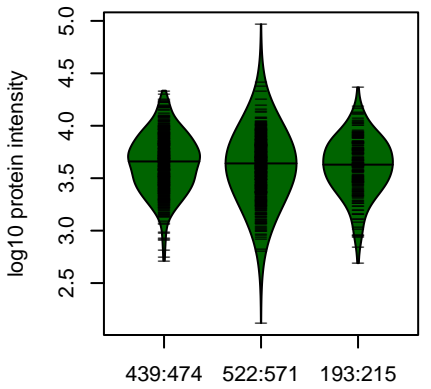

19:39205613:C:T\_T  
p = 0.19, beta = -0.0543, N = 1154

**VGSSGDIALHINPR pc3  
P56470**

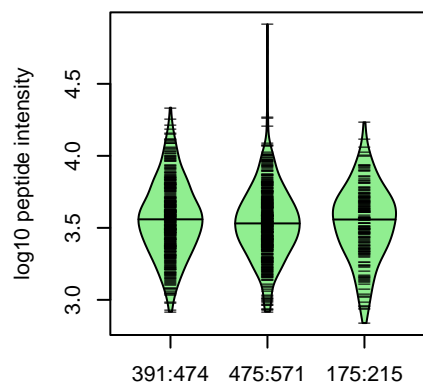

19:39205613:C:T\_T  
p = 0.17, beta = -0.0595, N = 1041

**VVFNTLQGGK pc2  
P56470**

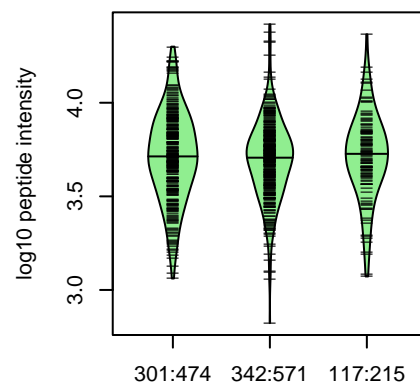

19:39205613:C:T\_T  
p = 0.88, beta = -0.00774, N = 760

**NSLLNGSWGSEEK pc2  
P56470**

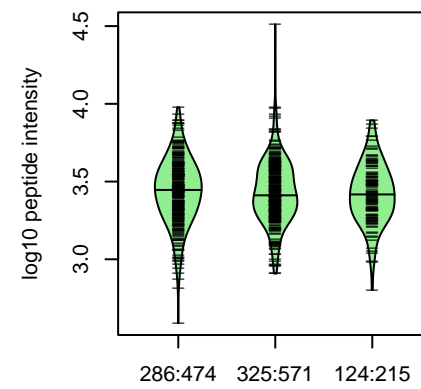

19:39205613:C:T\_T  
p = 0.48, beta = -0.0364, N = 735

**SFAINFK pc2  
P56470**

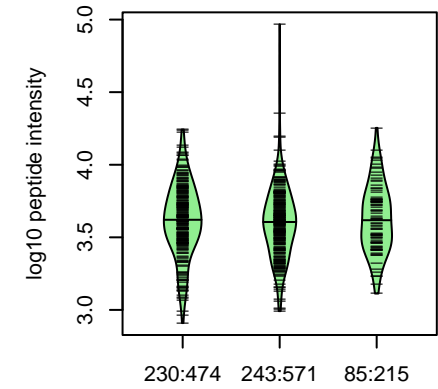

19:39205613:C:T\_T  
p = 0.86, beta = -0.0102, N = 558

**LGALS4 : NP3  
P56470**

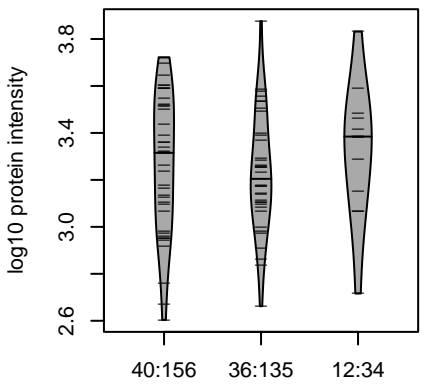

19:39205613:C:T\_T  
p = 0.83, beta = 0.0323, N = 88

**VGSSGDIALHINPR pc3  
P56470**

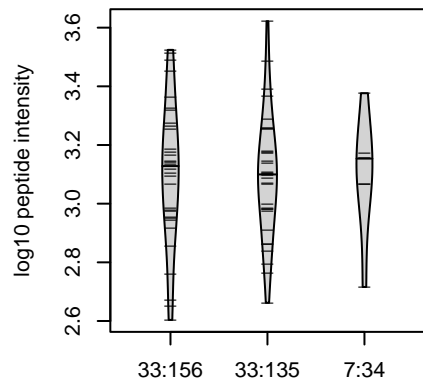

19:39205613:C:T\_T  
p = 0.72, beta = -0.0615, N = 73

**VVFNTLQGGK pc2  
P56470**

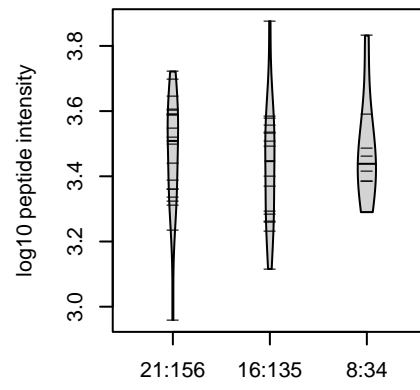

19:39205613:C:T\_T  
p = 0.88, beta = 0.0286, N = 45

Assay Target: LGALS4  
Olink UniProt: P56470  
deCODE rsID: rs883394  
Proxy rsID: rs883394  
deCODE: 19:38714973:T:C  
Proxy SNP: 19:39205613:C:T  
deCODE log10(p): 10.4  
deCODE BETA: -0.05  
- - - - -  
1041:760:735:558:342:153:29

**WFDC5 : NP1**  
**Q8TCV5;Q8TCV5-2**

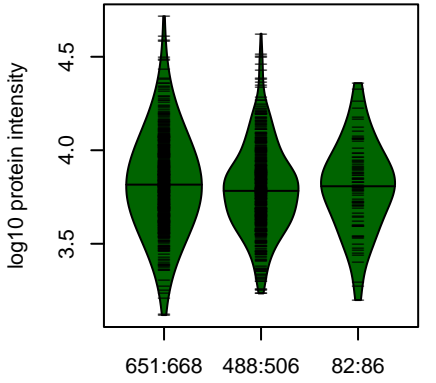

20:43727443:G:C\_C  
p = 0.0077, beta = -0.123, N = 1221

**LGSCPEDQLR pc2**  
**Q8TCV5;Q8TCV5-2**

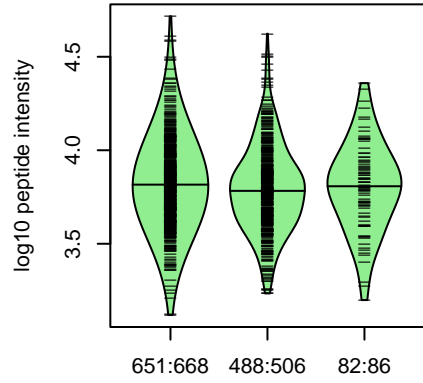

20:43727443:G:C\_C  
p = 0.0077, beta = -0.123, N = 1221

**WFDC5 : NP1**  
**Q8TCV5;Q8TCV5-2**

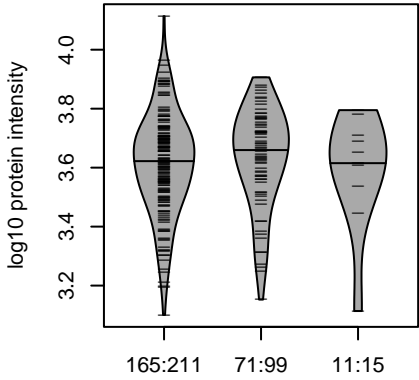

20:43727443:G:C\_C  
p = 0.88, beta = -0.0169, N = 247

**LGSCPEDQLR pc2**  
**Q8TCV5;Q8TCV5-2**

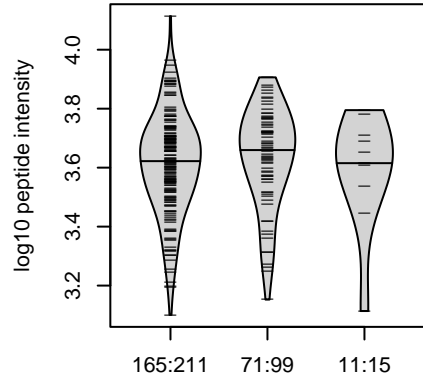

20:43727443:G:C\_C  
p = 0.88, beta = -0.0169, N = 247

**CLSPMNLCHK pc3**  
**rs17422688 REF**

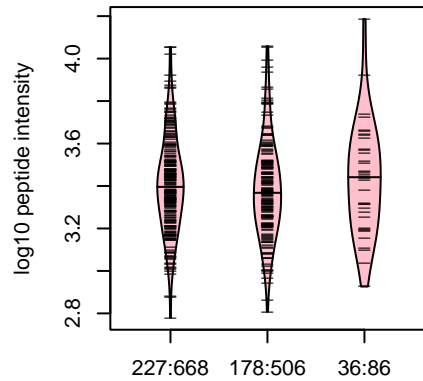

20:43727443:G:C\_C  
p = 0.2, model = DOM, N = 441

Assay Target: WFDC5  
Olink UniProt: Q8TCV5  
deCODE rsID: rs35456522  
Proxy rsID: rs35456522  
deCODE: 20:45098802:C:G  
Proxy SNP: 20:43727443:G:C  
deCODE log10(p): 10.2  
deCODE BETA: -0.06  
\*  
1221

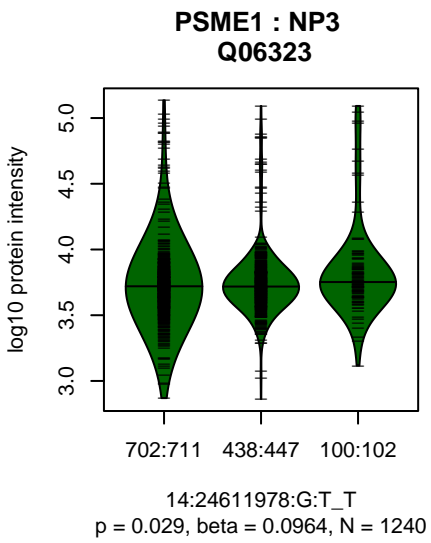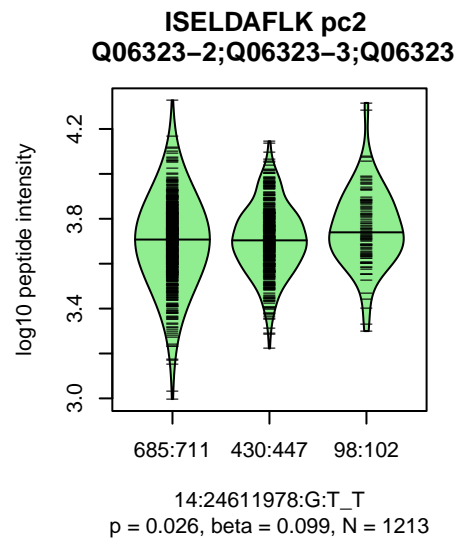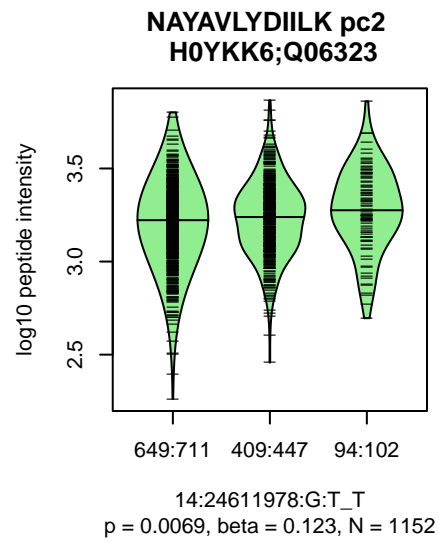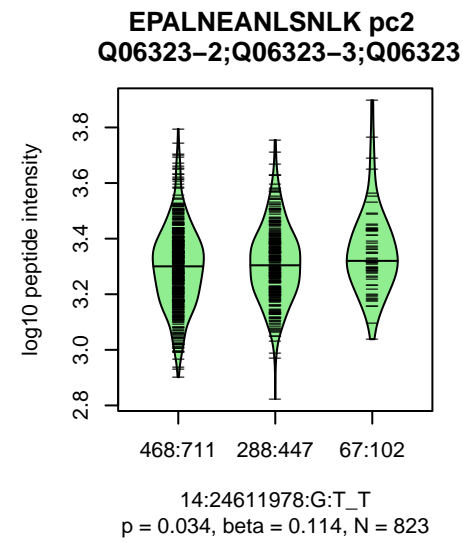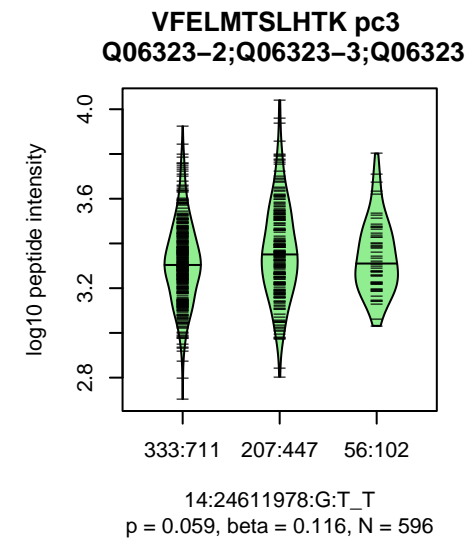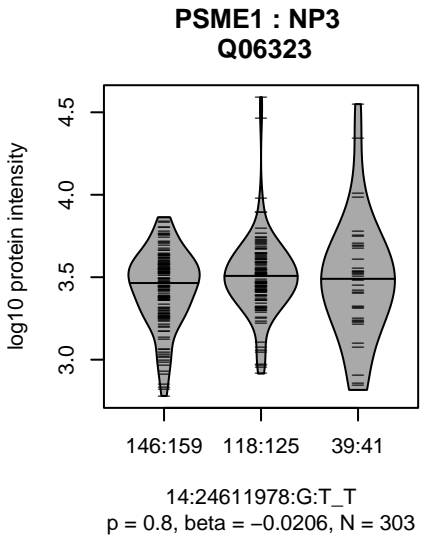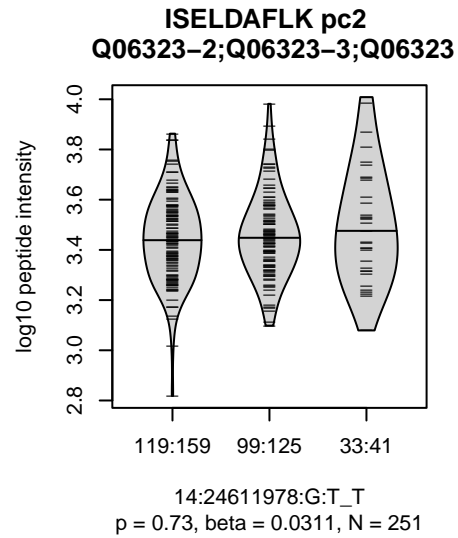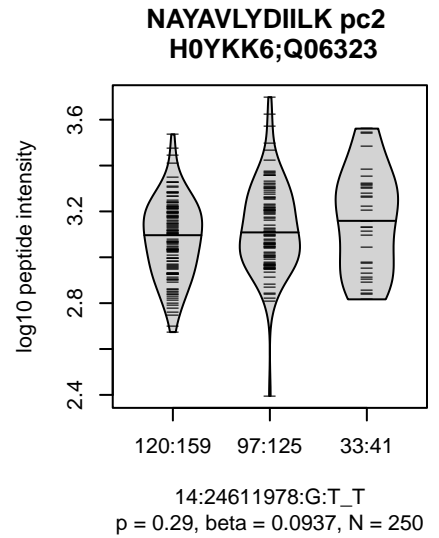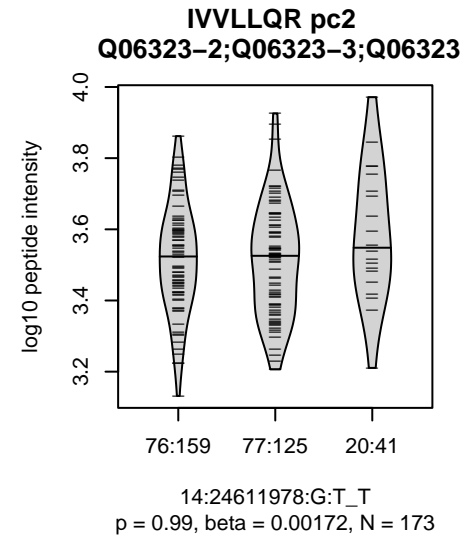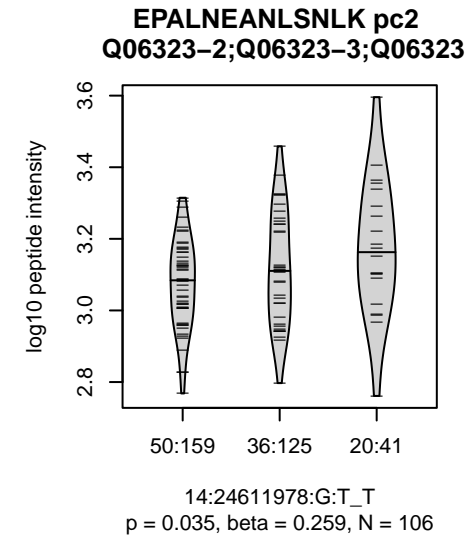

Assay Target: PSME1  
 Olink UniProt: Q06323  
 deCODE rsID: rs3742500  
 Proxy rsID: rs3742500  
 deCODE: 14:24142769:T:G  
 Proxy SNP: 14:24611978:G:T  
 deCODE log10(p): 9.9  
 deCODE BETA: 0.06  
 -\*:---\*:---\*:---\*:---\*:---:NA  
 1213:1152:823:596:552:510:502



**NBL1 : NP2**  
A0A087WTY6;P41271-2

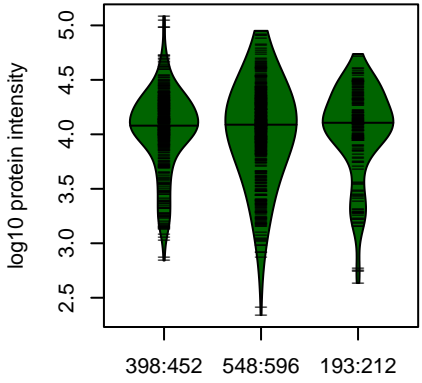

1:19761593:C:A\_C  
 $p = 0.87$ ,  $\beta = 0.0067$ ,  $N = 1139$

**ILHCSCQACGK pc3**  
A0A087WTY6;P41271;P41271-2

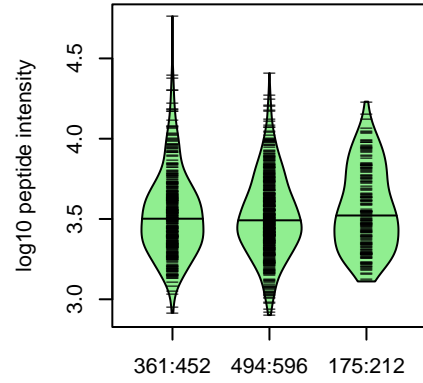

1:19761593:C:A\_C  
 $p = 0.29$ ,  $\beta = 0.047$ ,  $N = 1030$

**SAWCEAK pc2**  
A0A087WTY6;P41271;P41271-2

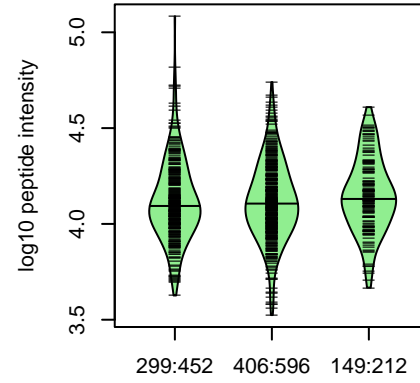

1:19761593:C:A\_C  
 $p = 0.28$ ,  $\beta = 0.0525$ ,  $N = 854$

**LALFPDK pc2**  
A0A087WTY6;P41271;P41271-2

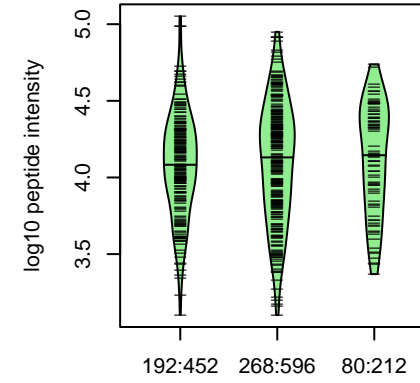

1:19761593:C:A\_C  
 $p = 0.52$ ,  $\beta = 0.0405$ ,  $N = 540$

Assay Target: NBL1  
Olink UniProt: P41271  
deCODE rsID: rs4911994  
Proxy rsID: rs4911994  
deCODE: 1:19435099:C:A  
Proxy SNP: 1:19761593:C:A  
deCODE  $\log_{10}(p)$ : 9.8  
deCODE BETA: 0.05  
-:-:-  
1030:854:540:517

**DNAJB1 : NP1  
P25685**

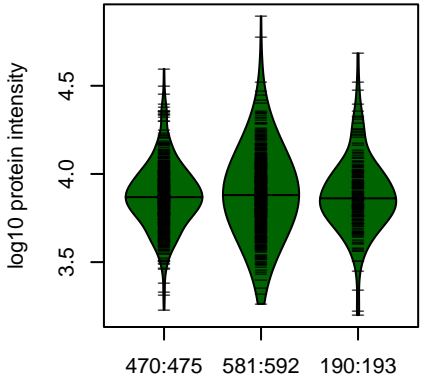

19:14651886:A:C\_A  
p = 0.98, beta = -0.00085, N = 1241

**VSLEEIYSGGTK pc2  
A7I2V3K7;M0QXK0;P25685-2;Q9UDY4 A0A7I2V3K7;M0QXK0;P25685-2;P25 A0A7I2V3K7;M0QXK0;P25685-2;P25**

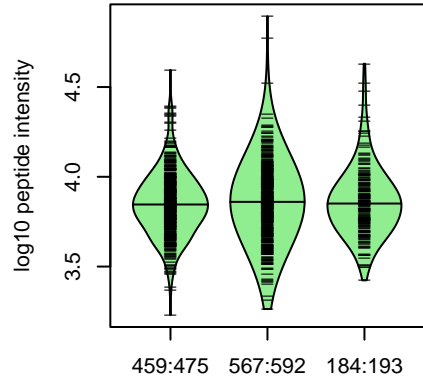

19:14651886:A:C\_A  
p = 0.76, beta = 0.0128, N = 1210

**KQDPPVTHDLR pc3**

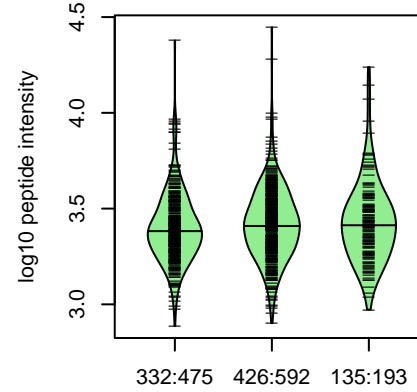

19:14651886:A:C\_A  
p = 0.21, beta = 0.061, N = 893

**ILTIEVK pc2**

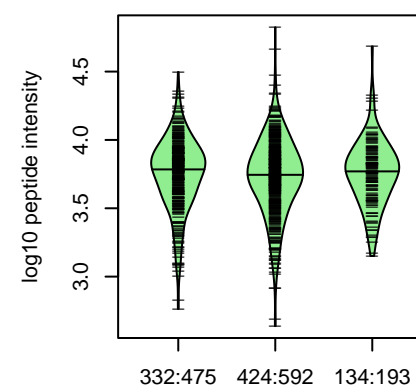

19:14651886:A:C\_A  
p = 0.9, beta = -0.00613, N = 890

**DYYQTLGLAR pc2  
M0QXK0;P25685**

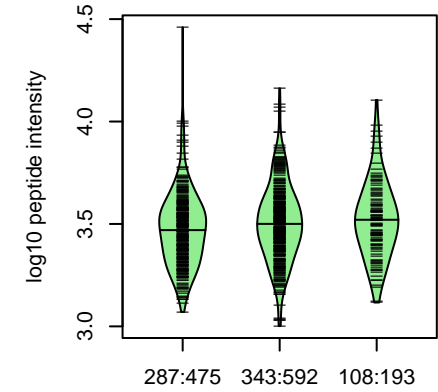

19:14651886:A:C\_A  
p = 0.021, beta = 0.123, N = 738

**DNAJB1 : NP1  
P25685**

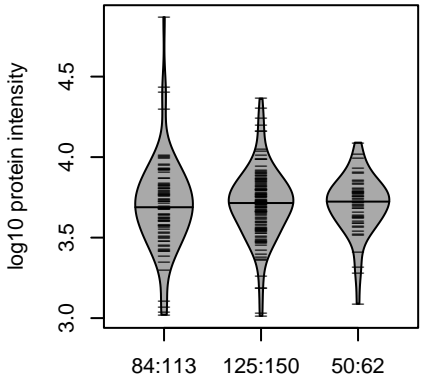

19:14651886:A:C\_A  
p = 0.46, beta = 0.0633, N = 259

**VSLEEIYSGGTK pc2  
A7I2V3K7;M0QXK0;P25685-2;Q9UDY4 A0A7I2V3K7;M0QXK0;P25685-2;P250A7I2V3K7;A0A7I2YQW1;P25685-2;P A0A7I2V3K7;M0QXK0;P25685-2;P25**

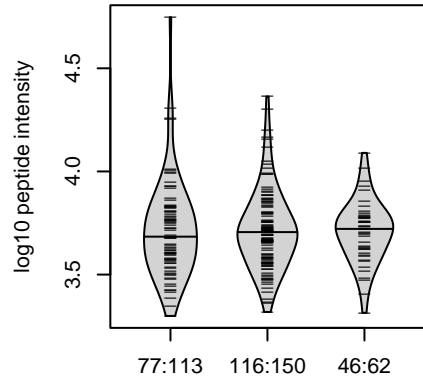

19:14651886:A:C\_A  
p = 0.57, beta = 0.0511, N = 239

**KQDPPVTHDLR pc3**

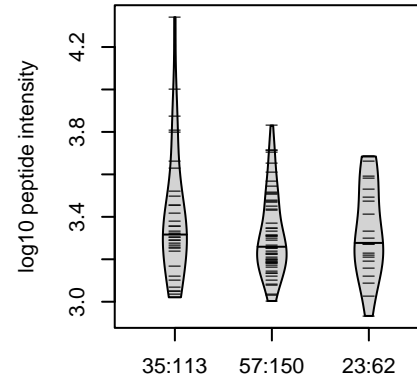

19:14651886:A:C\_A  
p = 0.74, beta = -0.0438, N = 115

**KVPGEGLPLPK pc2**

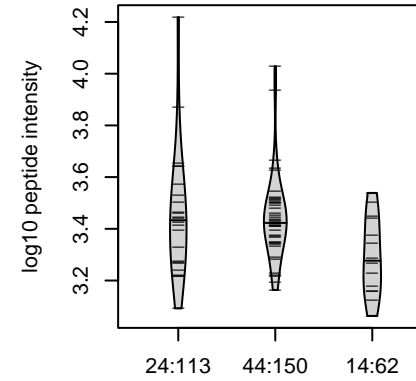

19:14651886:A:C\_A  
p = 0.0076, beta = -0.417, N = 82

**DGSDVIYPAR pc2**

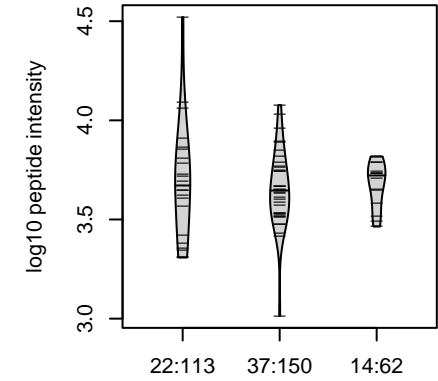

19:14651886:A:C\_A  
p = 0.62, beta = 0.0805, N = 73

Assay Target: DNAJB1  
Olink UniProt: P25685  
deCODE rsID: rs11085896  
Proxy rsID: rs11085896  
deCODE: 19:14541074:A:C  
Proxy SNP: 19:14651886:A:C  
deCODE log10(p): 9.7  
deCODE BETA: 0.05  
-----NA:NA  
1210:893:890:738:385:348:304:

**AK1 : NP3**  
**P00568;Q5T9B7**

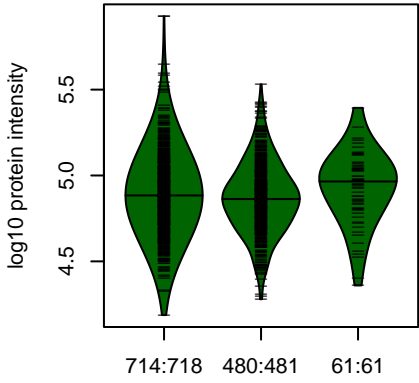

9:130642755:G:A\_A  
p = 0.5, beta = -0.0324, N = 1255

**ATEPVIAFYEK pc2**  
**Q5T9B7;P00568**

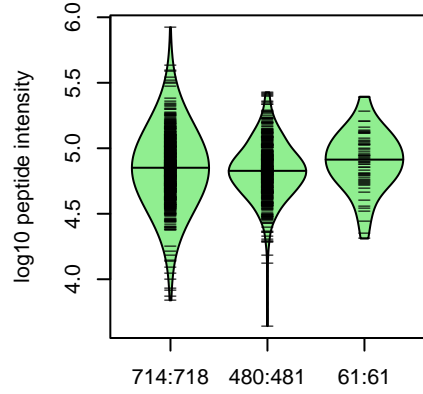

9:130642755:G:A\_A  
p = 0.96, beta = -0.00212, N = 1255

**IIFVVGPGSGK pc2**  
**Q5T9B7;P00568**

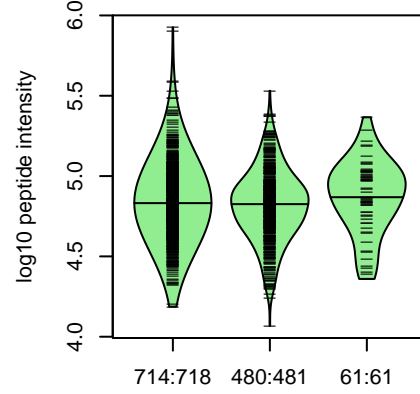

9:130642755:G:A\_A  
p = 0.42, beta = -0.0384, N = 1255

**GFLIDGYPR pc2**  
**Q5T9B7;Q9Y6K8;Q9Y6K8-3;P00568**

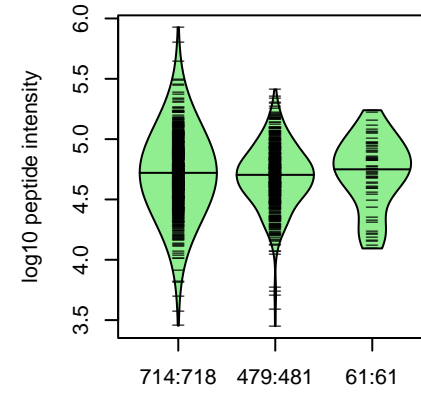

9:130642755:G:A\_A  
p = 0.19, beta = -0.0625, N = 1254

**YGTHLSTGDLLR pc3**  
**Q5T9B7;P00568**

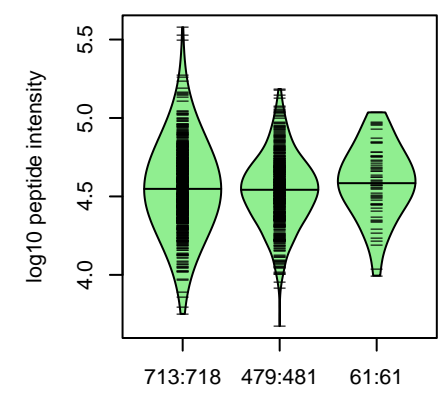

9:130642755:G:A\_A  
p = 0.59, beta = -0.0259, N = 1253

**AK1 : NP3**  
**P00568;Q5T9B7**

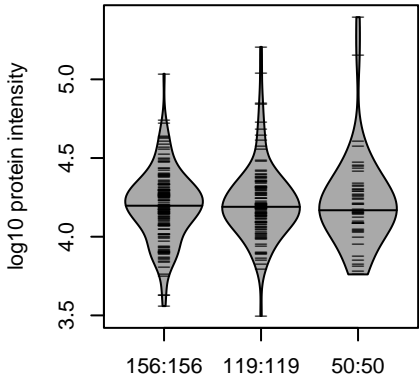

9:130642755:G:A\_A  
p = 0.93, beta = -0.00641, N = 325

**ATEPVIAFYEK pc2**  
**Q5T9B7;P00568**

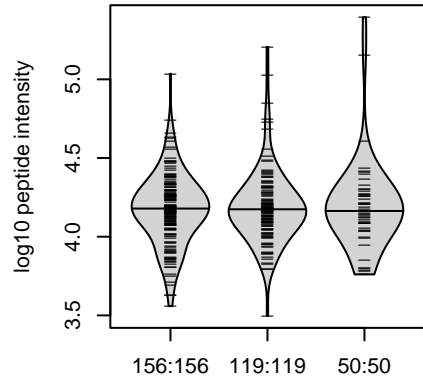

9:130642755:G:A\_A  
p = 0.91, beta = -0.00819, N = 325

**IIFVVGPGSGK pc2**  
**Q5T9B7;P00568**

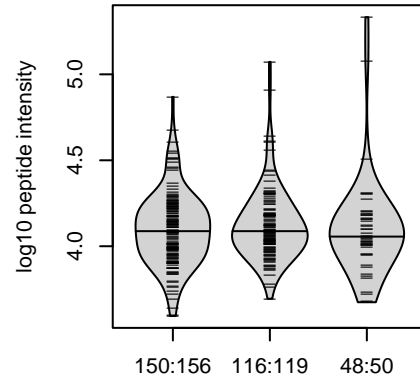

9:130642755:G:A\_A  
p = 0.71, beta = -0.0284, N = 314

**YGTHLSTGDLLR pc3**  
**Q5T9B7;P00568**

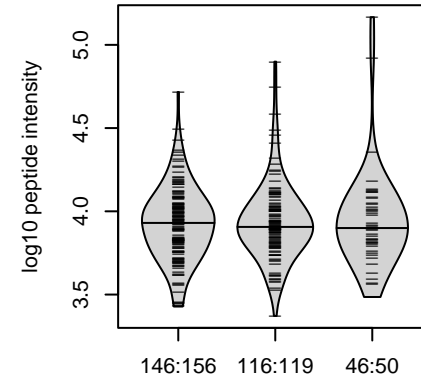

9:130642755:G:A\_A  
p = 0.79, beta = -0.0205, N = 308

**GFLIDGYPR pc2**  
**Q5T9B7;Q9Y6K8;Q9Y6K8-3;P00568**

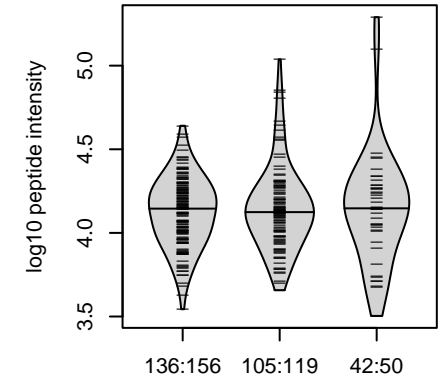

9:130642755:G:A\_A  
p = 0.92, beta = 0.00775, N = 283

Assay Target: AK1  
Olink UniProt: P00568  
deCODE rsID: rs9919018  
Proxy rsID: rs9919018  
deCODE: 9:127880476:A:G  
Proxy SNP: 9:130642755:G:A  
deCODE log10(p): 9.7  
deCODE BETA: -0.06  
-----  
1255:1255:1254:1253:1224:121

**TPI1 : NP1**  
**P60174-3**

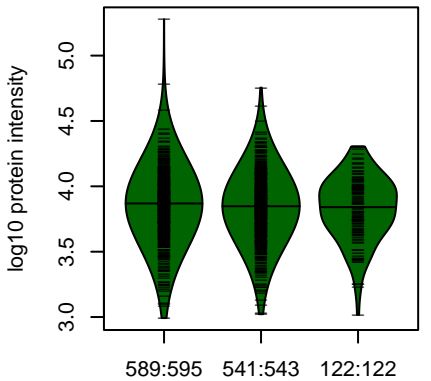

12:6977069:T:C\_C  
p = 0.13, beta = -0.0655, N = 1252

**QSLGELIGTLNAAK pc2**  
**P60174-3;P60174**

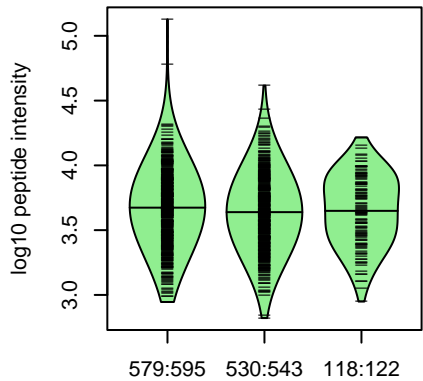

12:6977069:T:C\_C  
p = 0.15, beta = -0.0631, N = 1227

**SNVSDAVAQSTR pc2**  
**P60174-3;P60174-4;P60174**

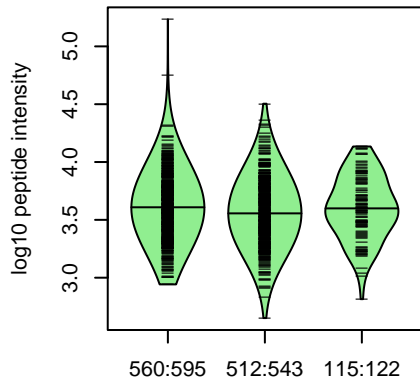

12:6977069:T:C\_C  
p = 0.12, beta = -0.0695, N = 1187

**VVLAYEPVWAIGTGK pc2**  
**P60174-3;P60174-4;P60174**

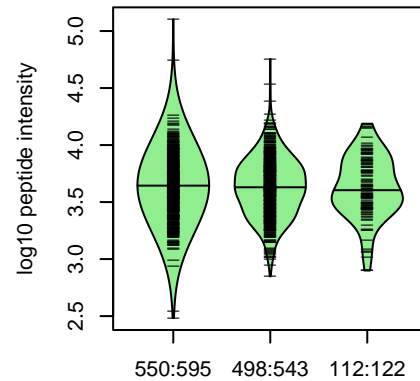

12:6977069:T:C\_C  
p = 0.34, beta = -0.0425, N = 1160

**IAVAAQNCYK pc2**  
**P60174-3;P60174**

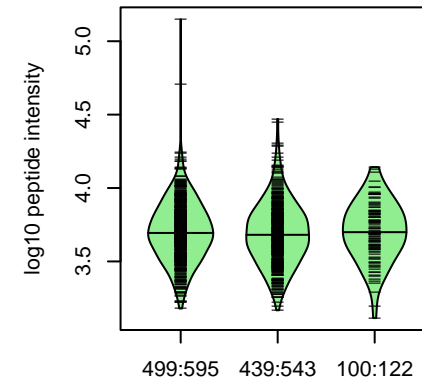

12:6977069:T:C\_C  
p = 0.66, beta = -0.0209, N = 1038

**TPI1 : NP1**  
**P60174;P60174-3**

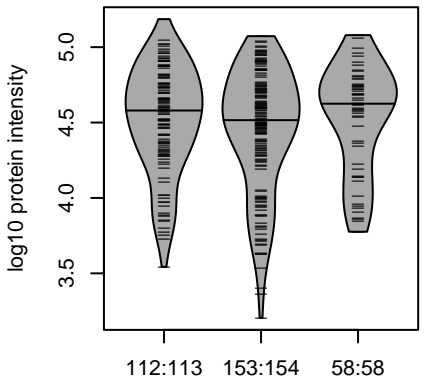

12:6977069:T:C\_C  
p = 0.77, beta = -0.0232, N = 323

**VVLAYEPVWAIGTGK pc2**  
**P60174-3;P60174-4;P60174**

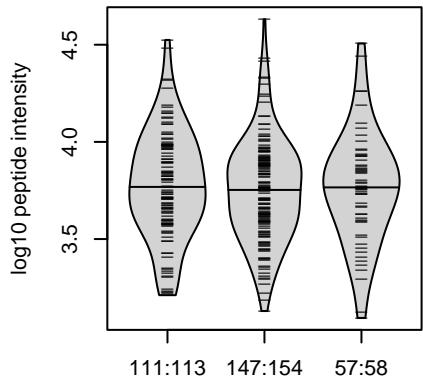

12:6977069:T:C\_C  
p = 0.62, beta = -0.0385, N = 315

**IAVAAQNCYK pc2**  
**P60174-3;P60174**

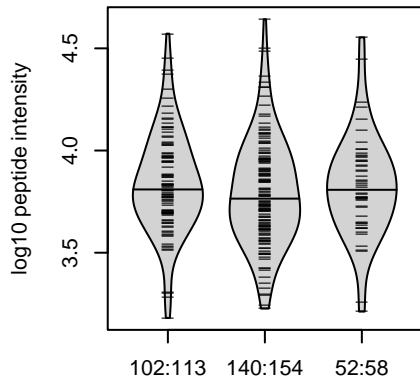

12:6977069:T:C\_C  
p = 0.37, beta = -0.0731, N = 294

**SNVSDAVAQSTR pc2**  
**P60174-3;P60174-4;P60174**

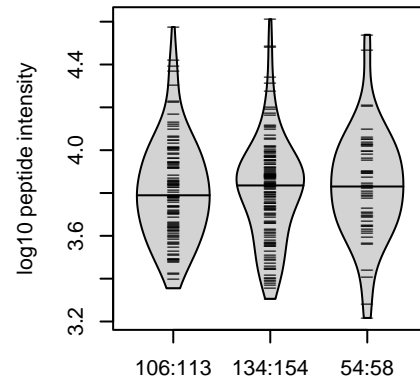

12:6977069:T:C\_C  
p = 0.76, beta = 0.0244, N = 294

**QSLGELIGTLNAAK pc2**  
**P60174-3;P60174**

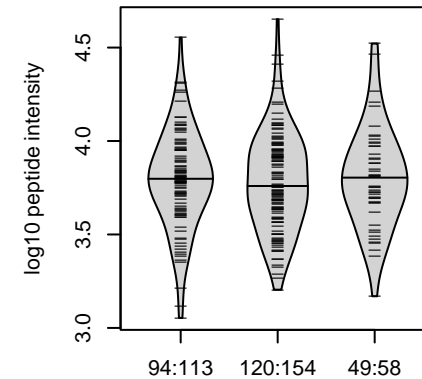

12:6977069:T:C\_C  
p = 0.98, beta = -0.00265, N = 263

Assay Target: TPI1  
Olink UniProt: P60174  
deCODE rsID: rs2071065  
Proxy rsID: rs2071065  
deCODE: 12:6867905:C:T  
Proxy SNP: 12:6977069:T:C  
deCODE log10(p): 9.7  
deCODE BETA: -0.06  
-----  
1227:1187:1160:1038:947:934:8

**IGFBP5 : NP4  
P24593**

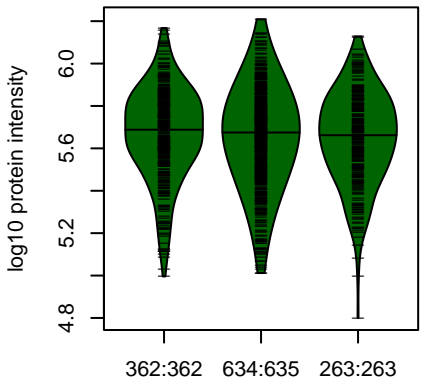

2:217677999:G:T\_G  
p = 0.099, beta = -0.0661, N = 1259

**AVYLPNCDR pc2  
P24593**

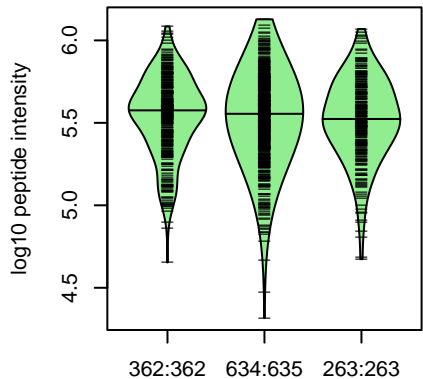

2:217677999:G:T\_G  
p = 0.29, beta = -0.0423, N = 1259

**GICWCVDK pc2  
P24593**

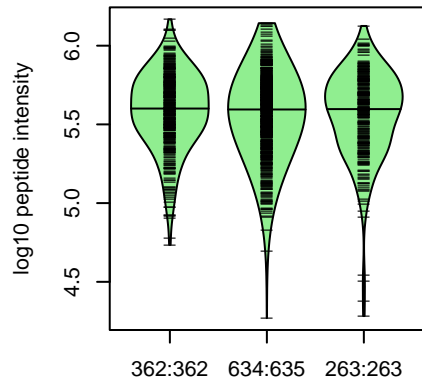

2:217677999:G:T\_G  
p = 0.15, beta = -0.0584, N = 1259

**AVYLPNCDR pc2  
P24593**

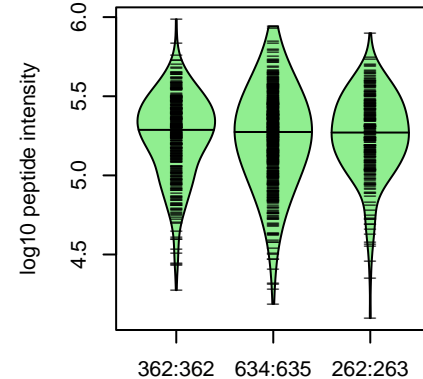

2:217677999:G:T\_G  
p = 0.97, beta = -0.0014, N = 1258

**FVGGAENTAHPR pc2  
P24593**

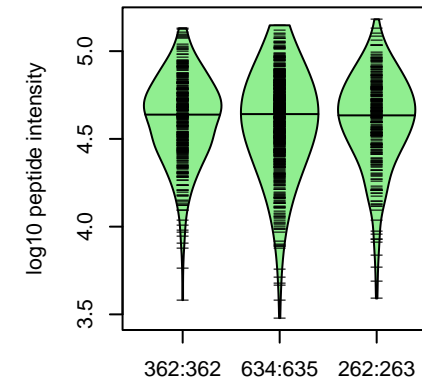

2:217677999:G:T\_G  
p = 0.43, beta = -0.0314, N = 1258

**IGFBP5 : NP4  
P24593**

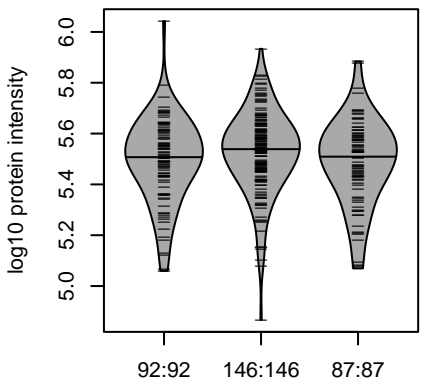

2:217677999:G:T\_G  
p = 0.86, beta = -0.0131, N = 325

**ALSMCPPSPLGCELVK pc2  
P24593**

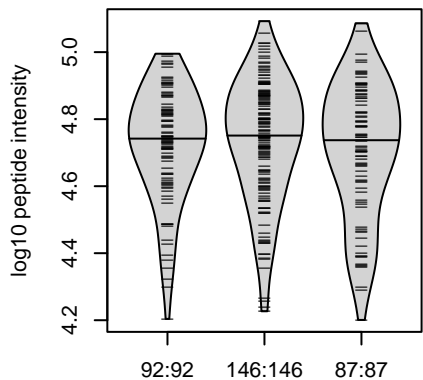

2:217677999:G:T\_G  
p = 0.41, beta = -0.0613, N = 325

**AVYLPNCDR pc2  
P24593**

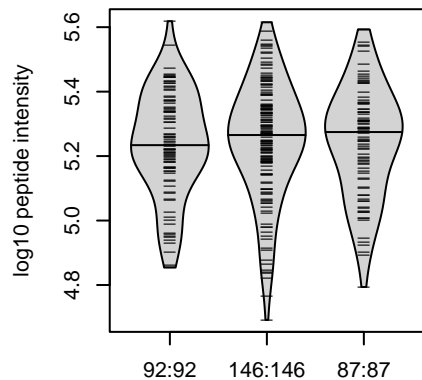

2:217677999:G:T\_G  
p = 0.74, beta = 0.0242, N = 325

**AVYLPNCDR pc2  
P24593**

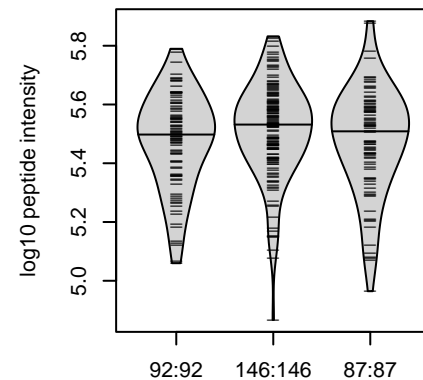

2:217677999:G:T\_G  
p = 0.86, beta = 0.0126, N = 325

**FVGGAENTAHPR pc2  
P24593**

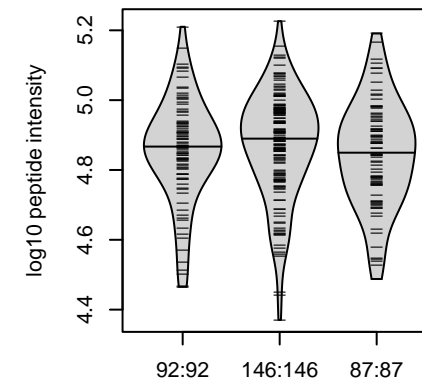

2:217677999:G:T\_G  
p = 0.33, beta = -0.0716, N = 325

Assay Target: IGFBP5  
Olink UniProt: P24593  
deCODE rsID: rs7598172  
Proxy rsID: rs7598172  
deCODE: 2:216813276:G:T  
Proxy SNP: 2:217677999:G:T  
deCODE log10(p): 9.6  
deCODE BETA: 0.05  
-----  
1259:1259:1258:1258:1253:125

**B3GALT6 : NP1**  
**Q96L58**

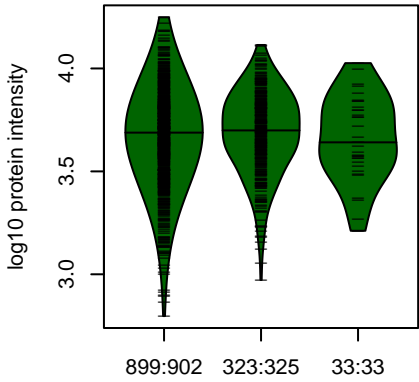

1:1166887:T:C\_C  
p = 0.17, beta = 0.0744, N = 1255

**AAAFVLAVASAPR pc2**  
**Q96L58**

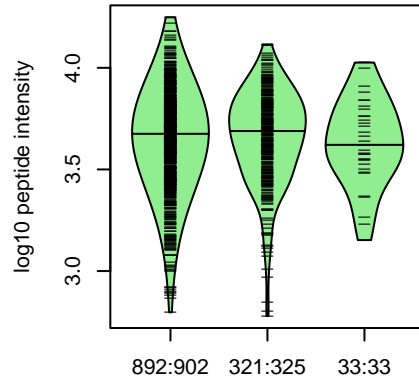

1:1166887:T:C\_C  
p = 0.46, beta = 0.0404, N = 1246

**LDALLAELR pc2**  
**Q96L58**

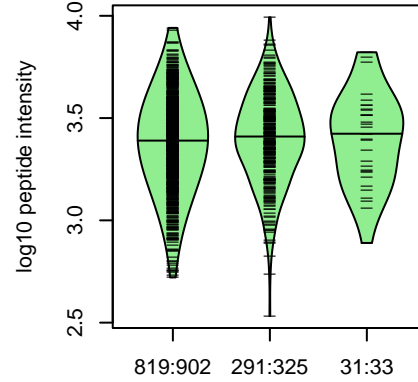

1:1166887:T:C\_C  
p = 0.066, beta = 0.105, N = 1141

**FAVGTAGLGAEER pc2**  
**Q96L58**

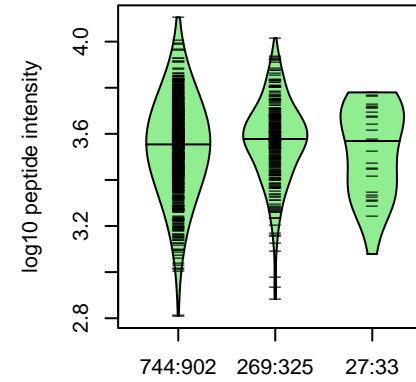

1:1166887:T:C\_C  
p = 0.13, beta = 0.0894, N = 1040

**LYWGFFSGR pc2**  
**Q96L58**

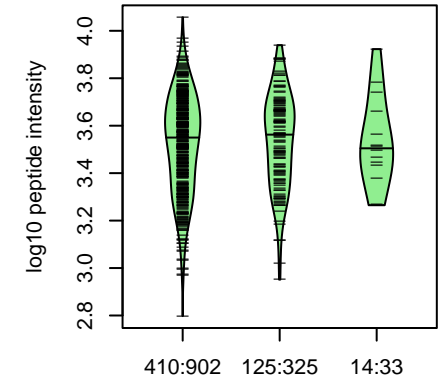

1:1166887:T:C\_C  
p = 0.39, beta = 0.0725, N = 549

**B3GALT6 : NP1**  
**Q96L58**

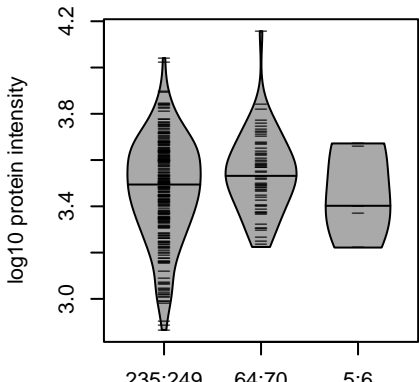

1:1166887:T:C\_C  
p = 0.2, beta = 0.155, N = 304

**AAAFVLAVASAPR pc2**  
**Q96L58**

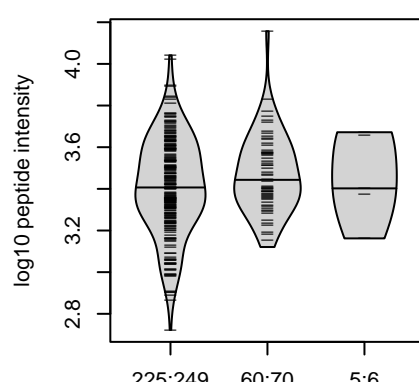

1:1166887:T:C\_C  
p = 0.23, beta = 0.149, N = 290

**FAVGTAGLGAEER pc2**  
**Q96L58**

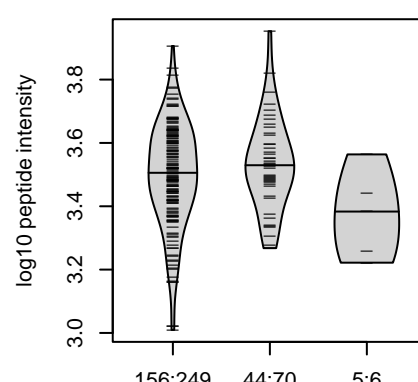

1:1166887:T:C\_C  
p = 0.93, beta = 0.0126, N = 205

**LDALLAELR pc2**  
**Q96L58**

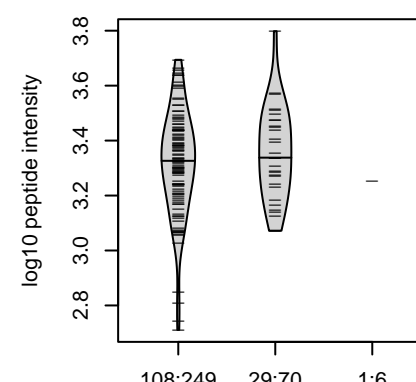

1:1166887:T:C\_C  
p = 0.87, beta = -0.0318, N = 138

Assay Target: B3GALT6  
Olink UniProt: Q96L58  
deCODE rsID: rs60252802  
Proxy rsID: rs60252802  
deCODE: 1:1231507:C:T  
Proxy SNP: 1:1166887:T:C  
deCODE log10(p): 9.4  
deCODE BETA: -0.07  
-----  
1246:1141:1040:549:362:305:14

**VTA1 : NP1**  
A0A087WY55;Q9NP79

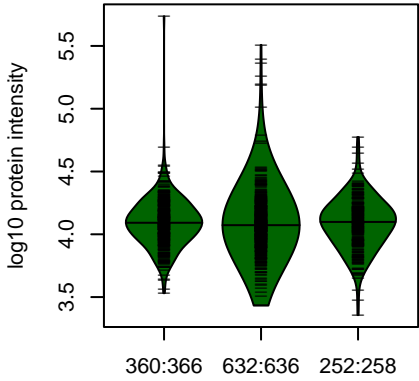

6:142487469:C:A\_A  
p = 0.37, beta = -0.0367, N = 1244

**MFLYADNEDR pc2**  
A0A087WY55;Q5TGM0;Q9NP79;Q9NP

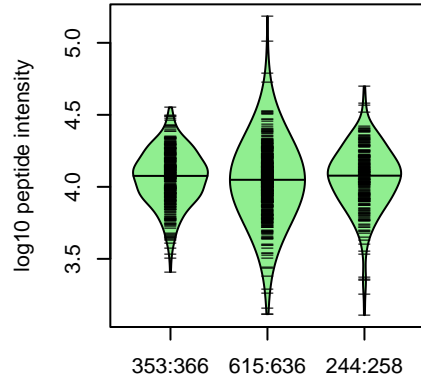

6:142487469:C:A\_A  
p = 0.69, beta = -0.0163, N = 1212

**LMDQLEALK pc2**  
A0A087WY55;Q9NP79

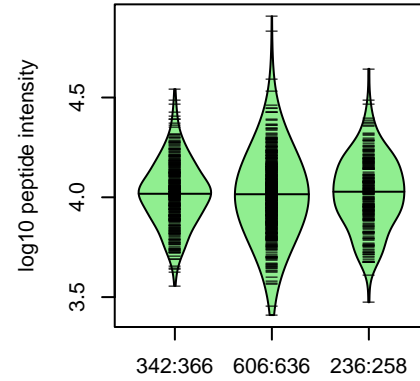

6:142487469:C:A\_A  
p = 0.84, beta = -0.00831, N = 1184

**ATYIHNCLK pc2**  
A0A087WY55;Q5TGM0;Q9NP79;Q9NP

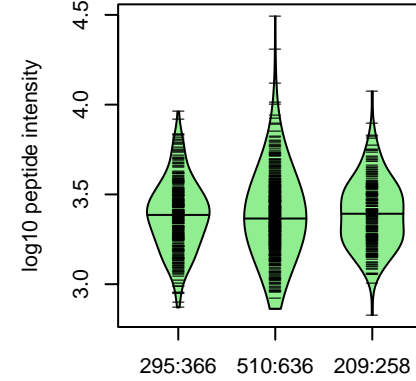

6:142487469:C:A\_A  
p = 0.72, beta = 0.0158, N = 1014

**LYAMQTGMK pc2**  
A0A087WY55;Q9NP79

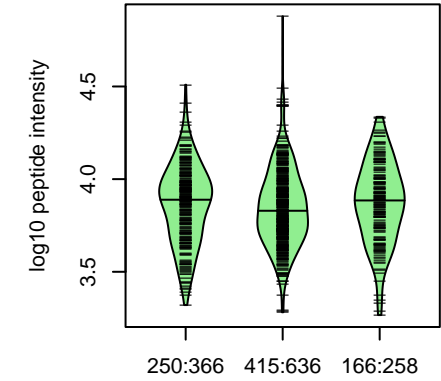

6:142487469:C:A\_A  
p = 0.75, beta = 0.016, N = 831

**VTA1 : NP1**  
A0A087WY55;Q9NP79

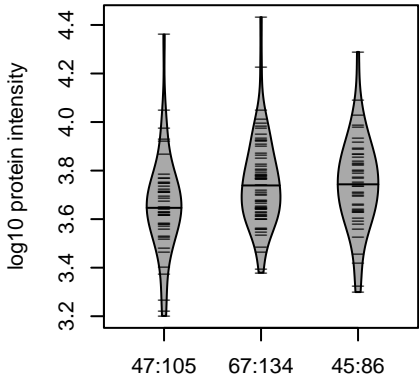

6:142487469:C:A\_C  
p = 0.009, beta = 0.264, N = 159

**MFLYADNEDR pc2**  
A0A087WY55;Q5TGM0;Q9NP79;Q9NP

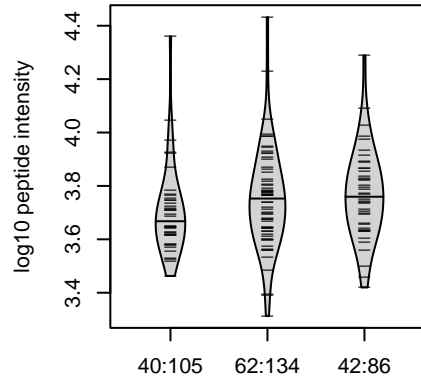

6:142487469:C:A\_C  
p = 0.079, beta = 0.189, N = 144

**LMDQLEALK pc2**  
A0A087WY55;Q9NP79

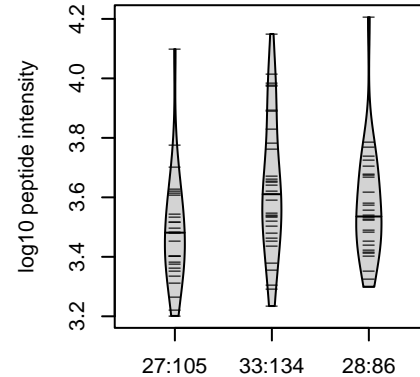

6:142487469:C:A\_C  
p = 0.11, beta = 0.208, N = 88

**ATYIHNCLK pc2**  
A0A087WY55;Q5TGM0;Q9NP79;Q9NP

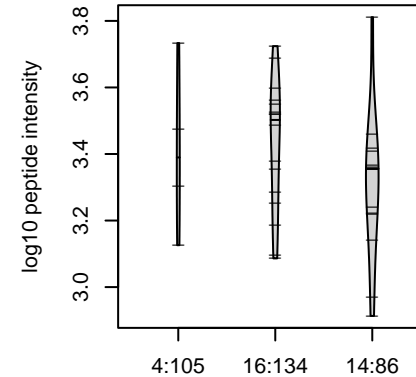

6:142487469:C:A\_C  
p = 0.12, beta = -0.374, N = 34

Assay Target: VTA1  
Olink UniProt: Q9NP79  
deCODE rsID: rs225656  
Proxy rsID: rs225656  
deCODE: 6:142166332:A:C  
Proxy SNP: 6:142487469:C:A  
deCODE log10(p): 9.1  
deCODE BETA: -0.05  
-:-:-:-:-:NA:NA  
1212:1184:1014:831:146:89:12:

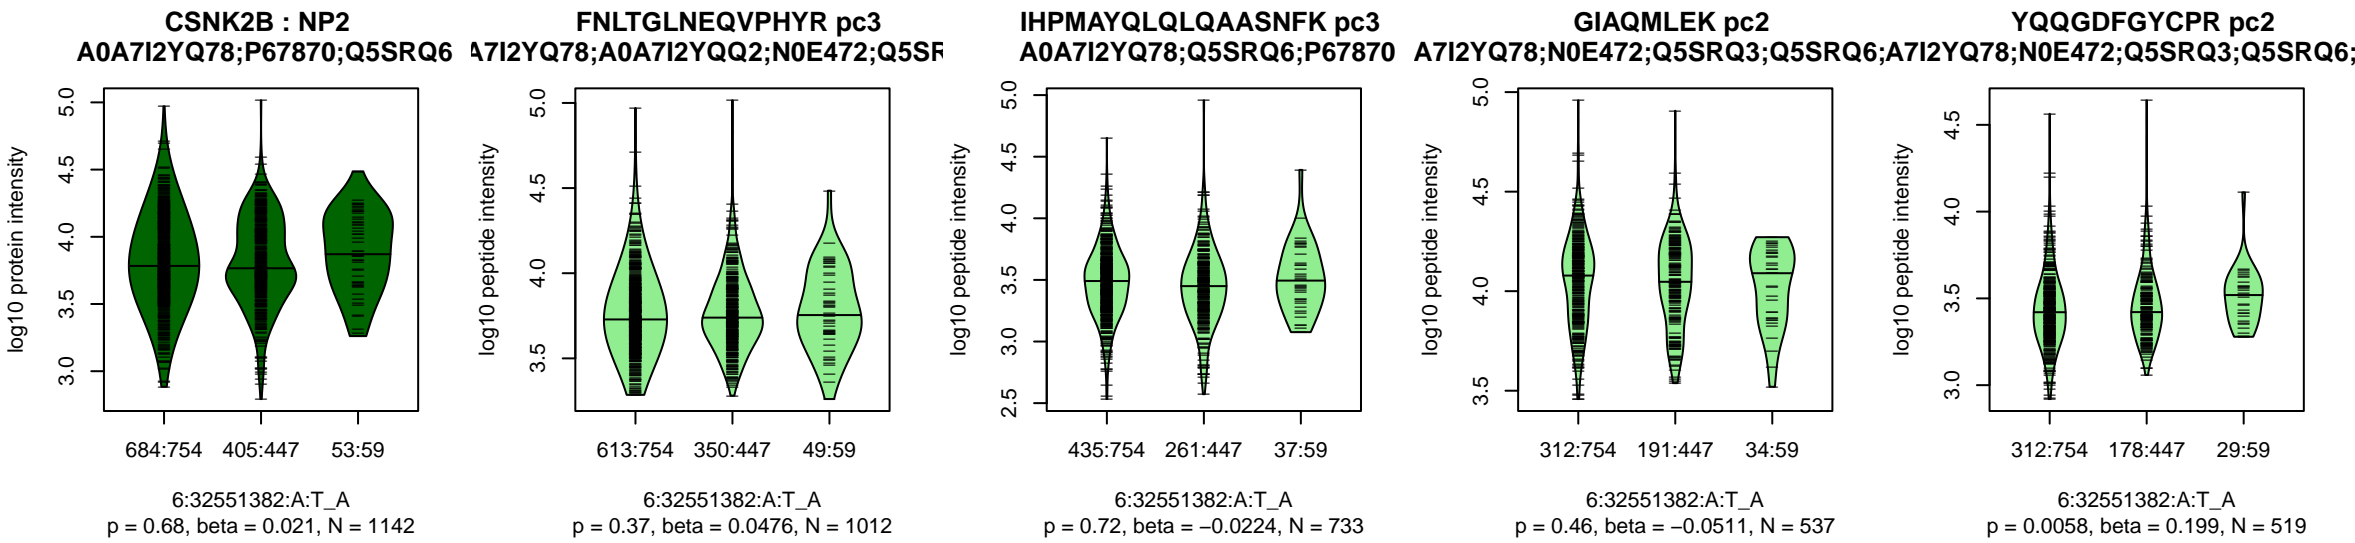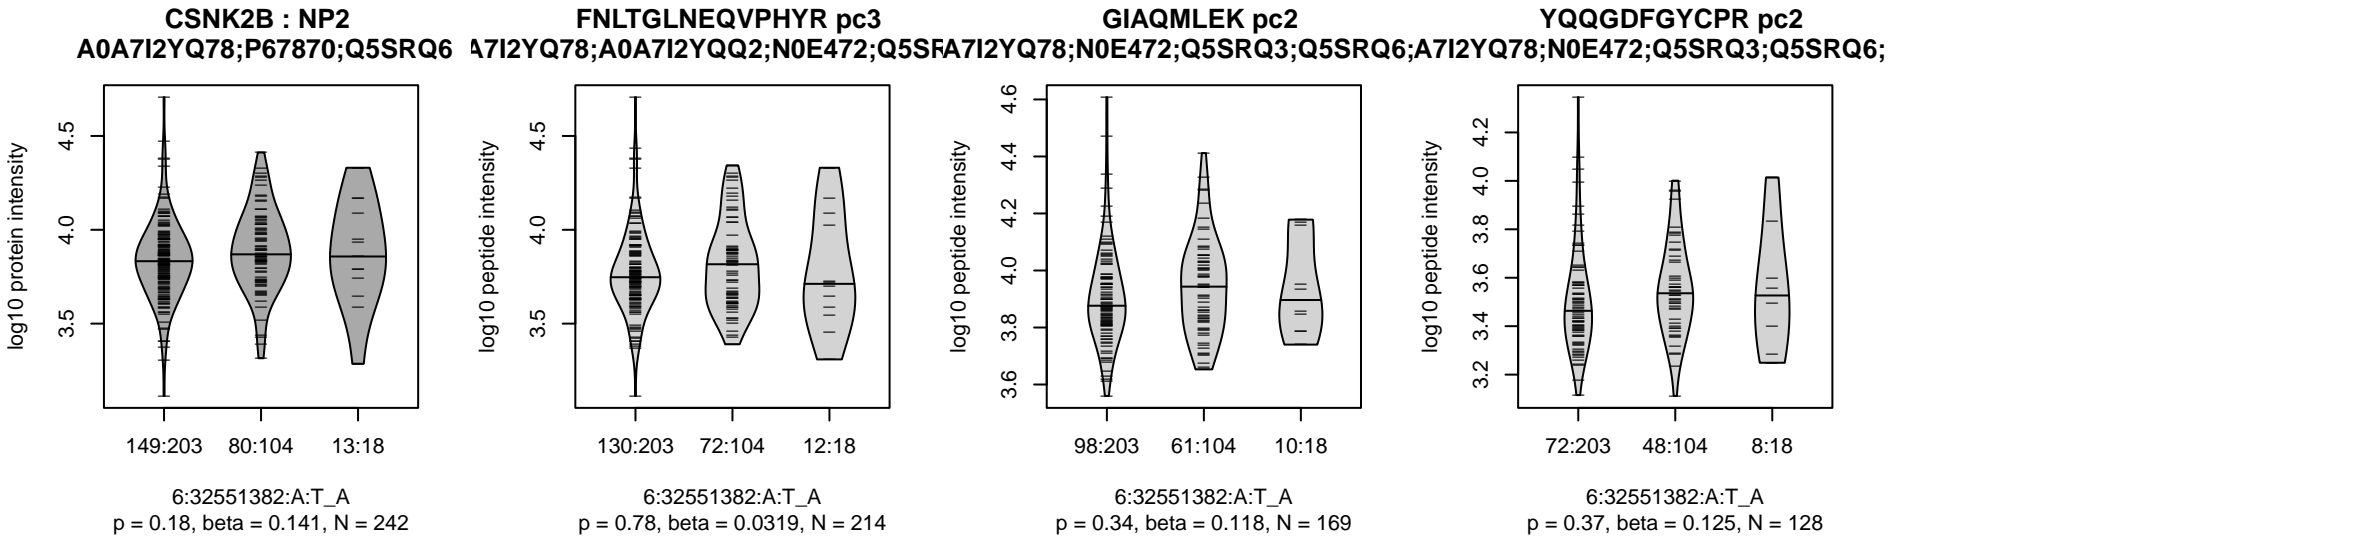

Assay Target: CSNK2B  
 Olink UniProt: P67870  
 deCODE rsID: rs78912960  
 Proxy rsID: rs9269911  
 deCODE: 6:32538131:G:A  
 Proxy SNP: 6:32551382:A:T  
 deCODE log10(p): 9  
 deCODE BETA: -0.05  
 -: -: \*: NA  
 1012:733:537:519:9



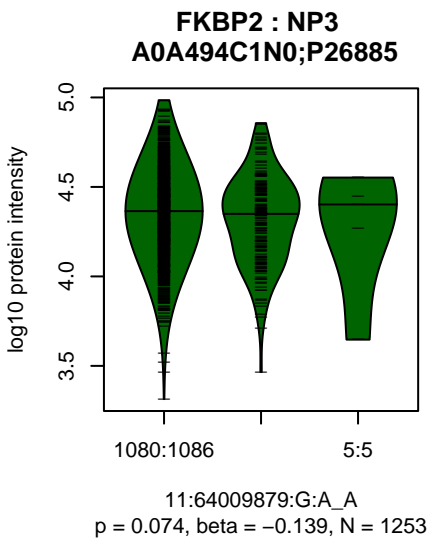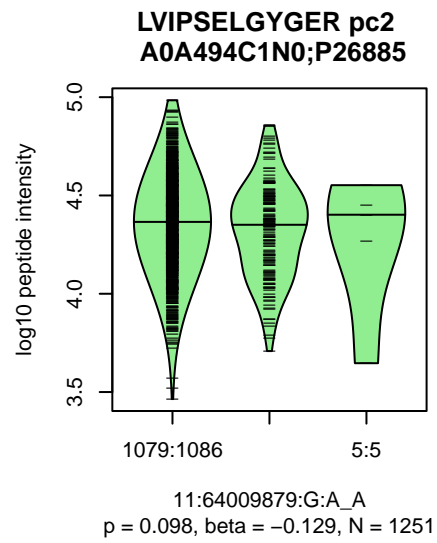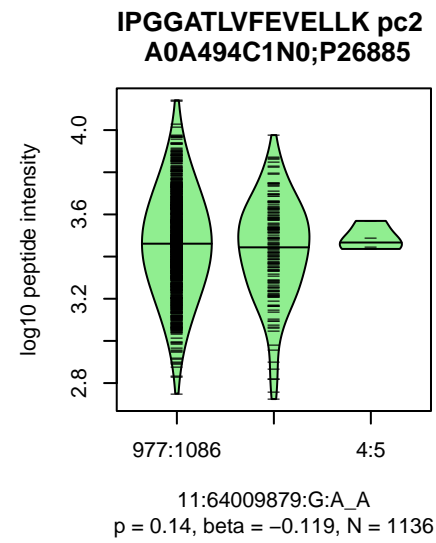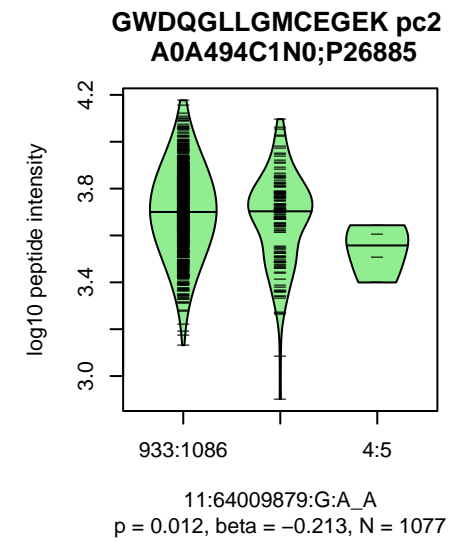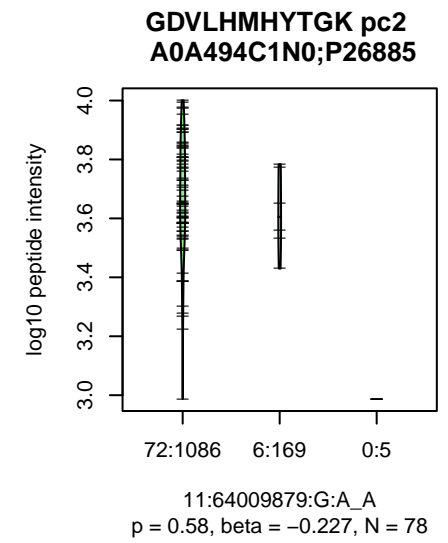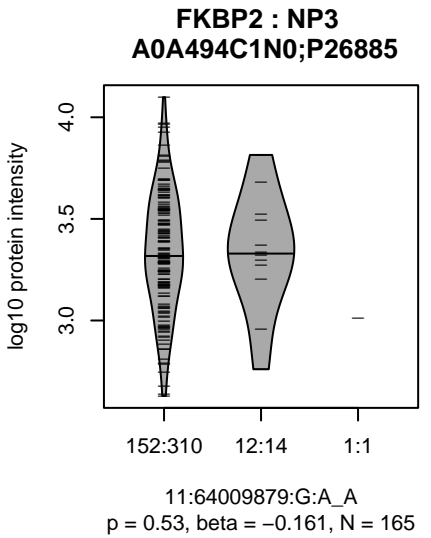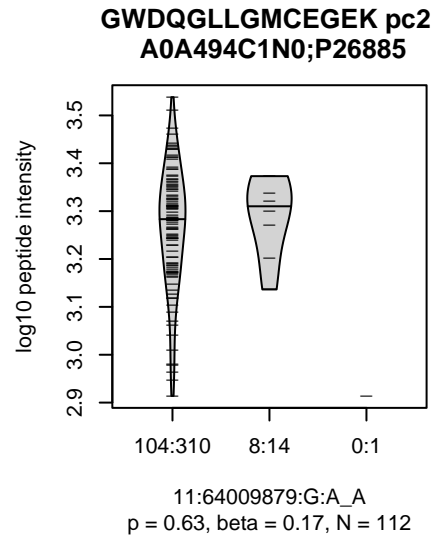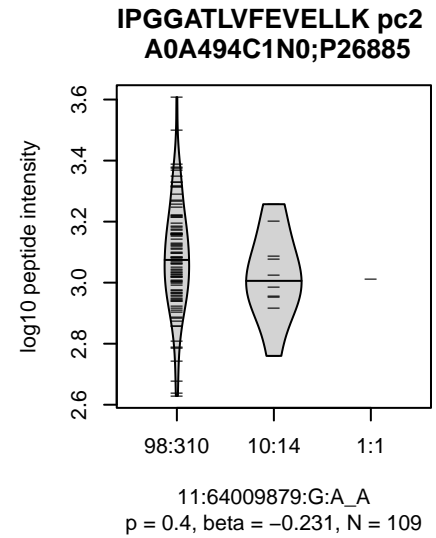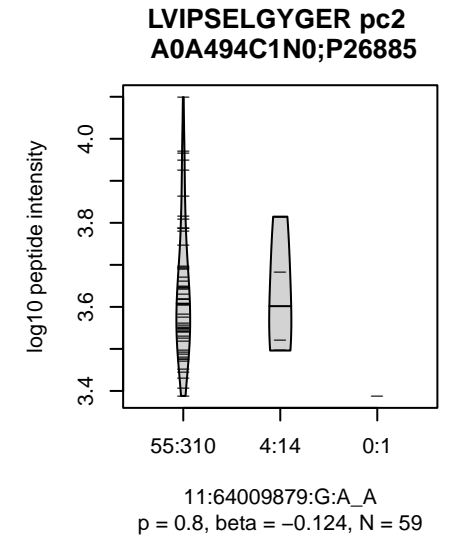

Assay Target: FKBP2  
Olink UniProt: P26885  
deCODE rsID: rs4672  
Proxy rsID: rs4672  
deCODE: 11:64242407:A:G  
Proxy SNP: 11:64009879:G:A  
deCODE log10(p): 8.9  
deCODE BETA: -0.08  
-:-:-:-  
1251:1136:1077:78:57

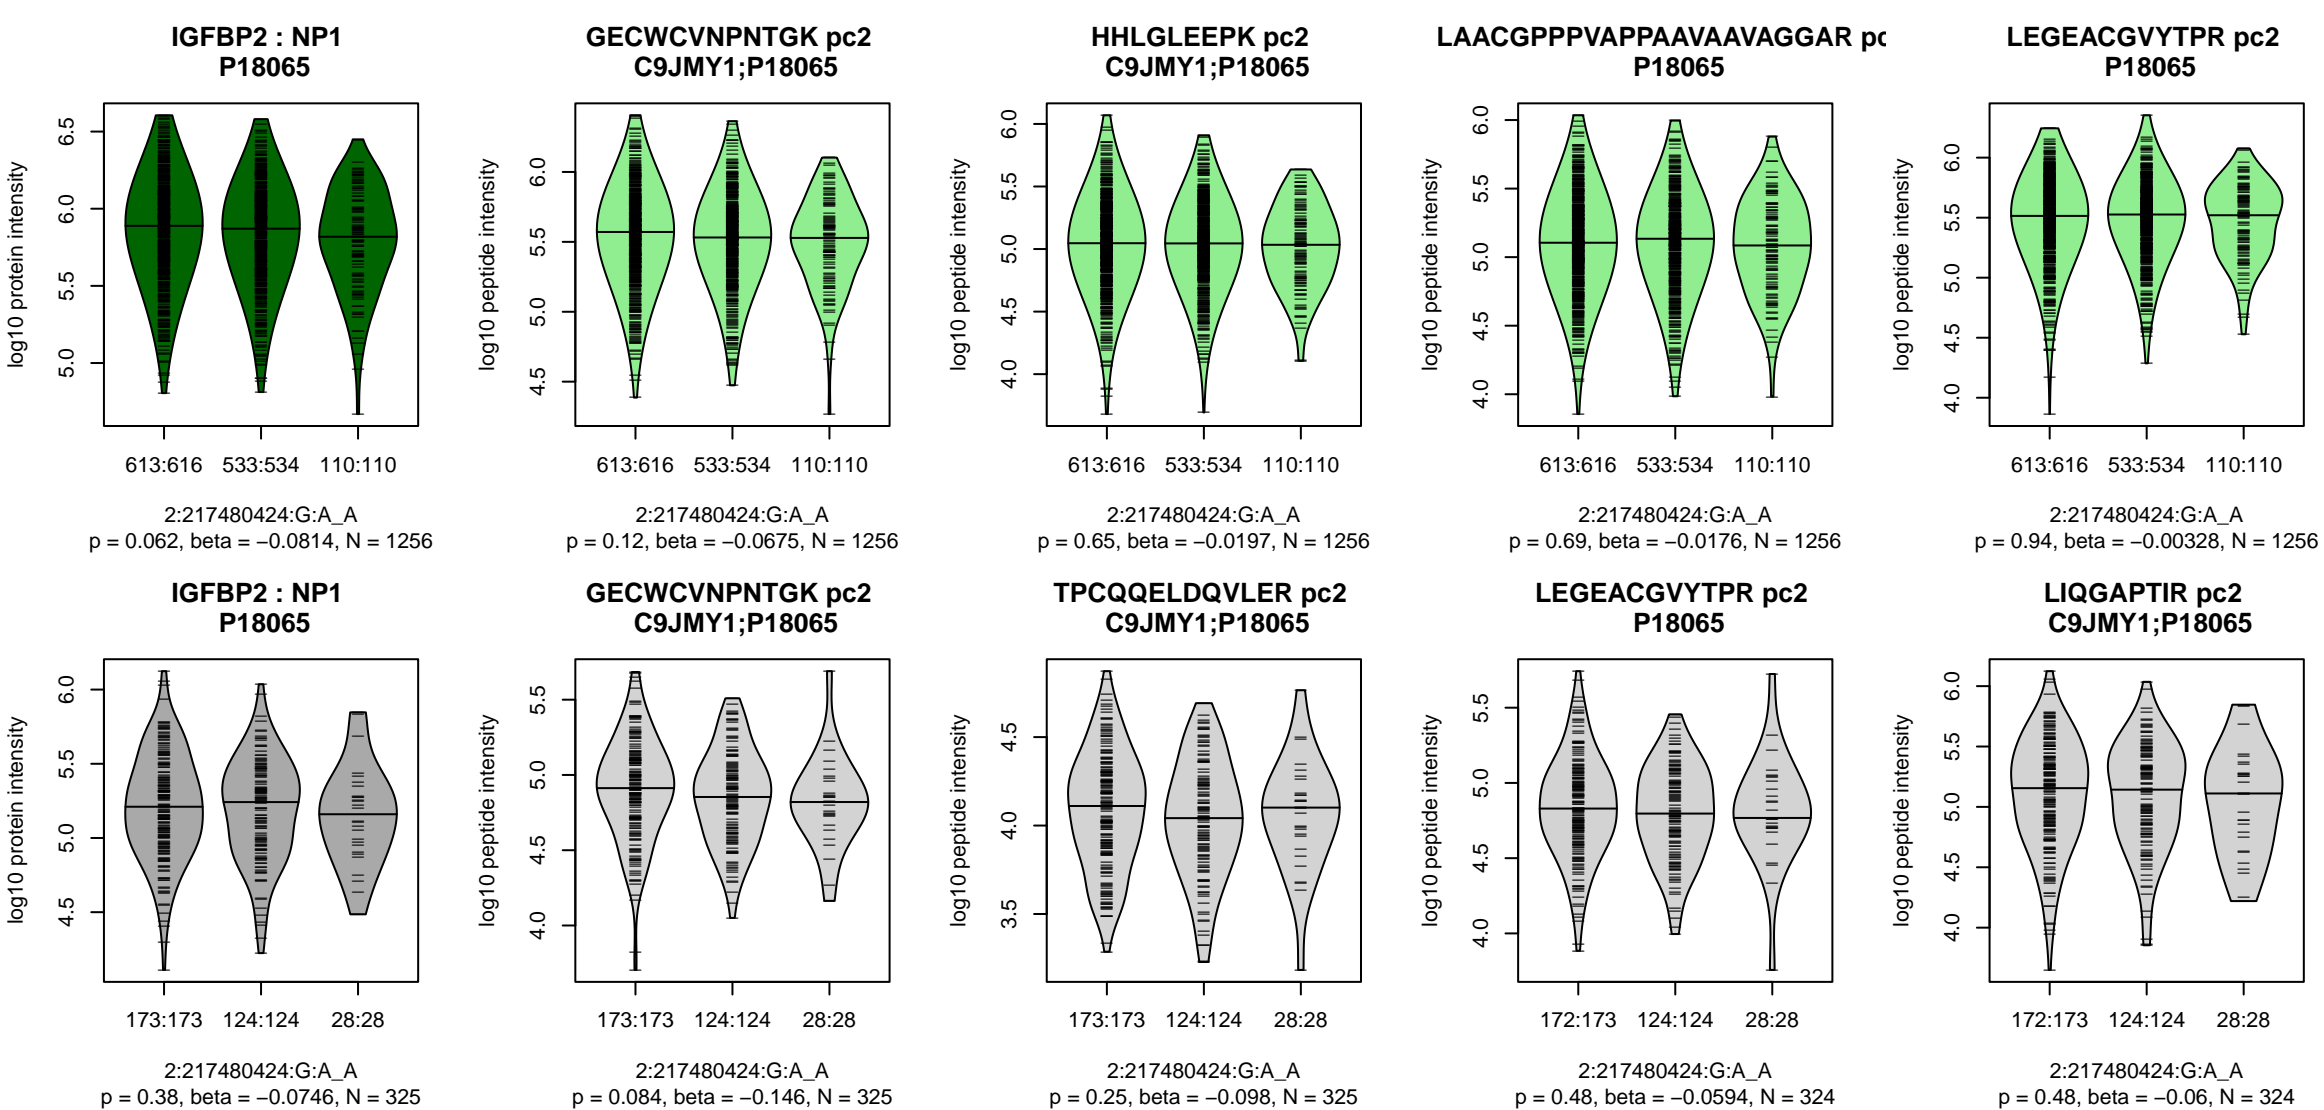

Assay Target: IGFBP2  
 Olink UniProt: P18065  
 deCODE rsID: rs4674100  
 Proxy rsID: rs4674100  
 deCODE: 2:216615701:A:G  
 Proxy SNP: 2:217480424:G:A  
 deCODE log<sub>10</sub>(p): 8.9  
 deCODE BETA: -0.06  
 -----  
 1256:1256:1256:1256:1255:125
