# Supplementary material for: A genome-wide association study of mass spectrometry proteomics using the Seer Proteograph platform
Source: PubMed Central journal article supplement (PMC11160678; doi:10.1101/2024.05.27.596028), 2024-06-01
Supplement: media-2.pdf [file media-2.pdf]

**GALC [cis]**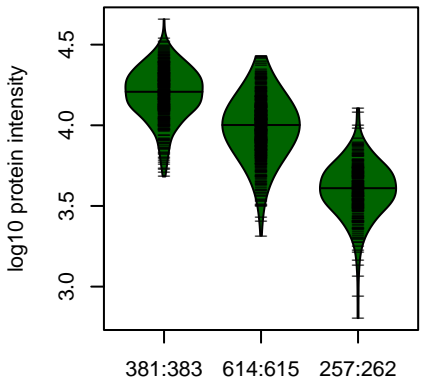

14:88393918:A:C\_C  
 $p = 1.1e-205$ ,  $\beta = -1.02$ ,  $N = 1252$

**SLWTDIPVNFPK pc2**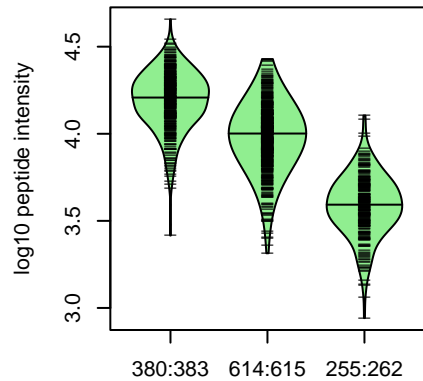

14:88393918:A:C\_C  
 $p = 1.3e-199$ ,  $\beta = -1.01$ ,  $N = 1249$

**GYEWWLMK pc2**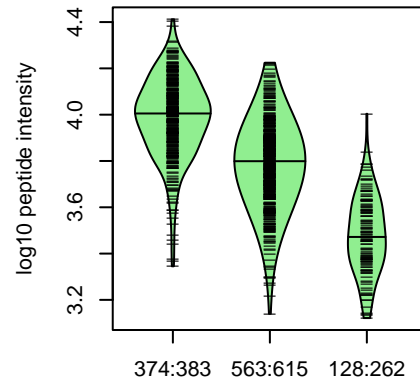

14:88393918:A:C\_C  
 $p = 8.8e-121$ ,  $\beta = -0.975$ ,  $N = 1065$

**GSFSEIPELQVWYTK pc2**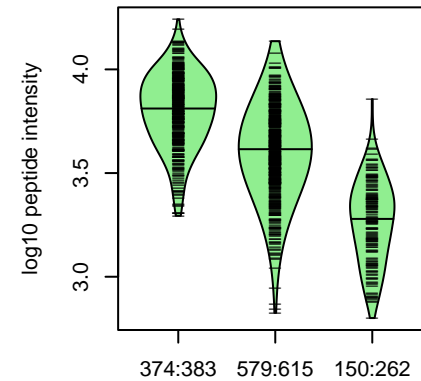

14:88393918:A:C\_C  
 $p = 7.6e-112$ ,  $\beta = -0.916$ ,  $N = 1103$

**SQFPSTYK pc2**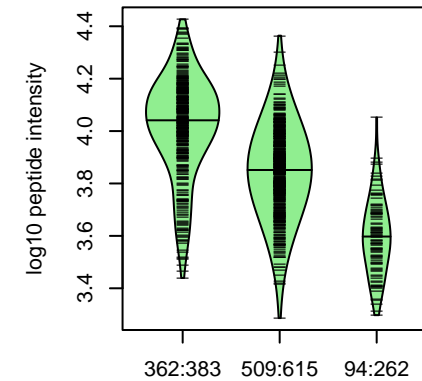

14:88393918:A:C\_C  
 $p = 1.6e-84$ ,  $\beta = -0.902$ ,  $N = 965$

**P54803 NP5**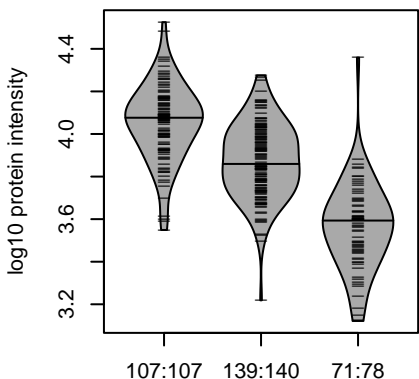

rs380142  
 $p = 2.3e-41$ ,  $\beta = -0.889$ ,  $N = 317$

**SLWTDIPVNFPK pc2**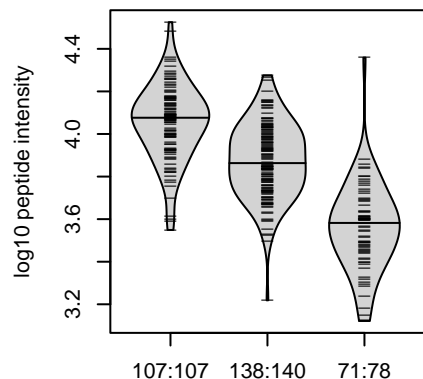

rs380142  
 $p = 1.1e-40$ ,  $\beta = -0.874$ ,  $N = 316$

**GSFSEIPELQVWYTK pc2**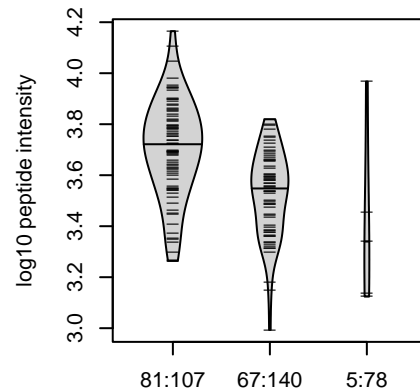

rs380142  
 $p = 5.1e-09$ ,  $\beta = -0.78$ ,  $N = 153$

**CDVYIETPDTGGVFIAGR pc2**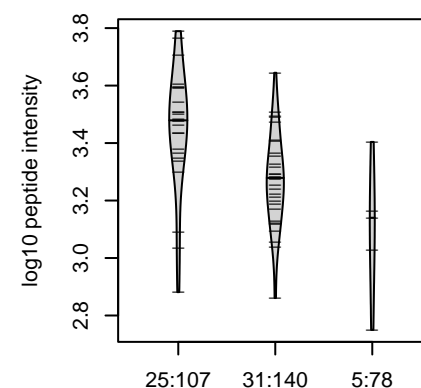

rs380142  
 $p = 6e-05$ ,  $\beta = -0.745$ ,  $N = 61$

**VTGDLAGWIIYALGRVEVTAK pc3**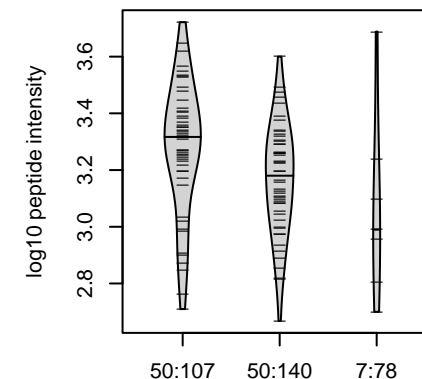

rs380142  
 $p = 0.0087$ ,  $\beta = -0.399$ ,  $N = 107$

**VVNVIGAHYPGTHSAK pc3  
rs34362748 ALT**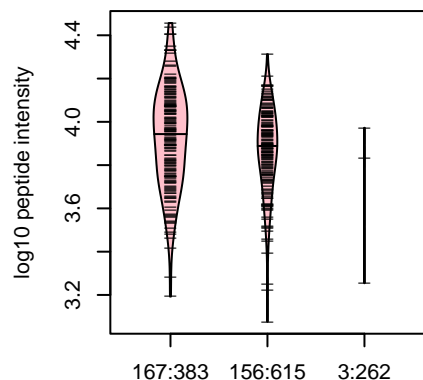

14:88393918:A:C\_C  
 $p = 5.8e-34$ ,  $\text{model} = \text{DOM}$ ,  $N = 326$

**VVDVIGAHYPGTHSAK pc4  
rs34362748 REF**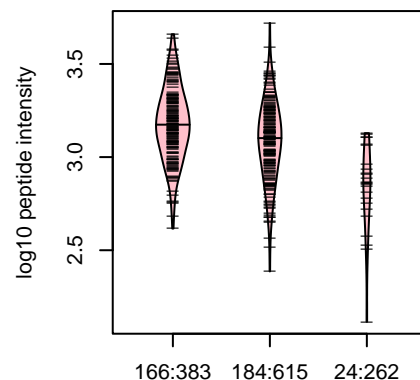

14:88393918:A:C\_C  
 $p = 1.6e-18$ ,  $\text{model} = \text{DOM}$ ,  $N = 374$

Locus: 1 (Sort: 1)  
 Status: Replicated  
 80% power: Yes  
 SNP: 14:88393918:A:C  
 rsID: rs380142  
 UniProtID: P54803  
 HGNC gene: GALC  
 Type: Cis-pQTL

**HEG1 [cis]**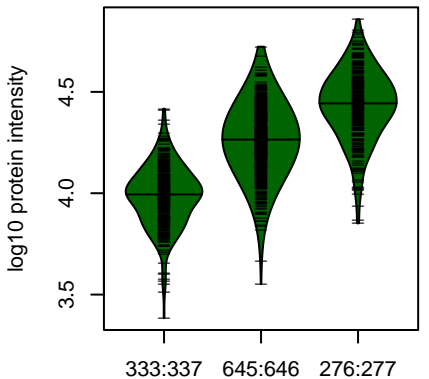

3:124746182:C:A\_C  
 $p = 4e-179$ ,  $\beta = 0.99$ ,  $N = 1254$

**SGTASEMGTER pc2**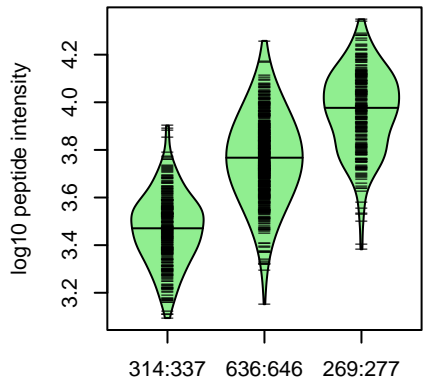

3:124746182:C:A\_C  
 $p = 4e-190$ ,  $\beta = 1.03$ ,  $N = 1219$

**EGVMVQTSGK pc2**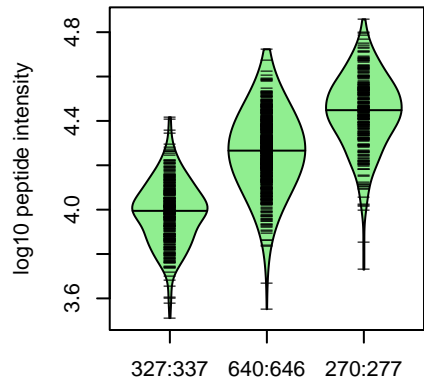

3:124746182:C:A\_C  
 $p = 2.4e-181$ ,  $\beta = 1$ ,  $N = 1237$

**ALSLAPLAGAGLELQLER pc2**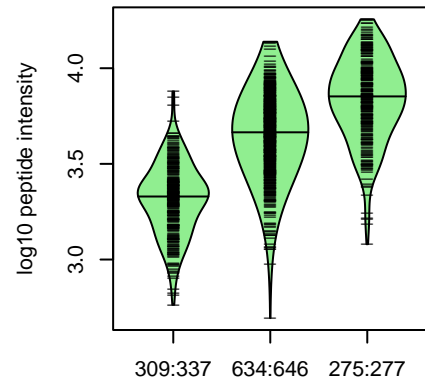

3:124746182:C:A\_C  
 $p = 3.4e-146$ ,  $\beta = 0.932$ ,  $N = 1218$

**TMHVATVFTDGGPR pc3**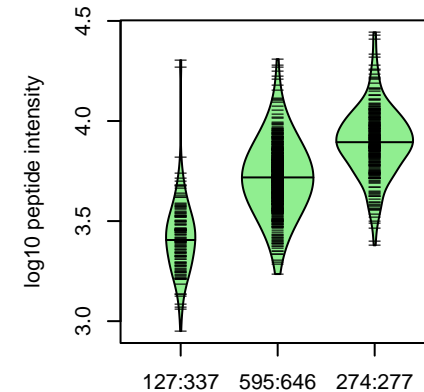

3:124746182:C:A\_C  
 $p = 8.1e-109$ ,  $\beta = 1.01$ ,  $N = 996$

**Q9ULI3 NP2**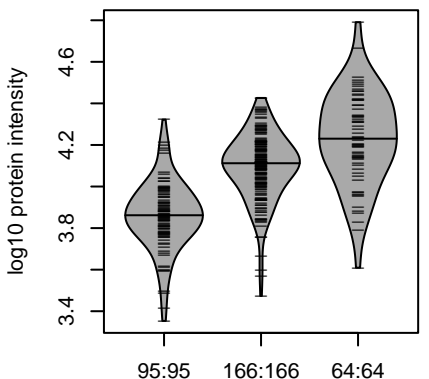

rs2333041  
 $p = 3.3e-31$ ,  $\beta = 0.834$ ,  $N = 325$

**SGTASEMGTER pc2**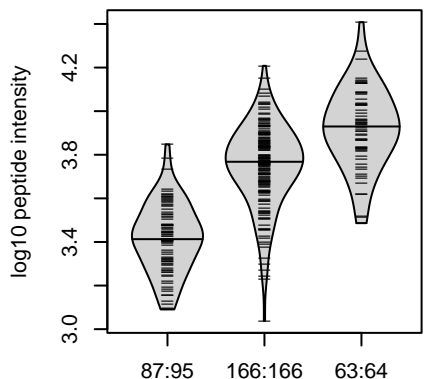

rs2333041  
 $p = 1.9e-43$ ,  $\beta = 0.971$ ,  $N = 316$

**ALSLAPLAGAGLELQLER pc2**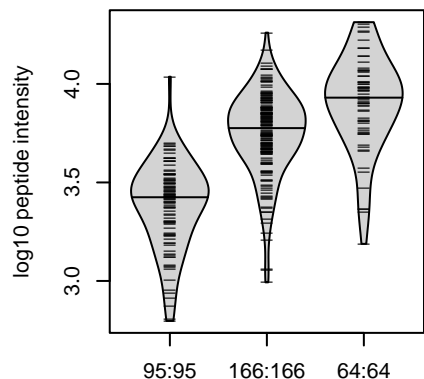

rs2333041  
 $p = 1.3e-37$ ,  $\beta = 0.898$ ,  $N = 325$

**EGVMVQTSGK pc2**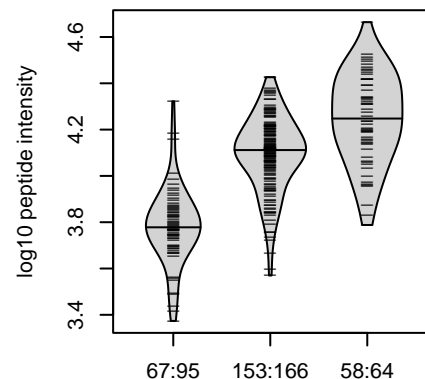

rs2333041  
 $p = 2.8e-35$ ,  $\beta = 0.959$ ,  $N = 278$

**SLTVSLGPVSK pc2**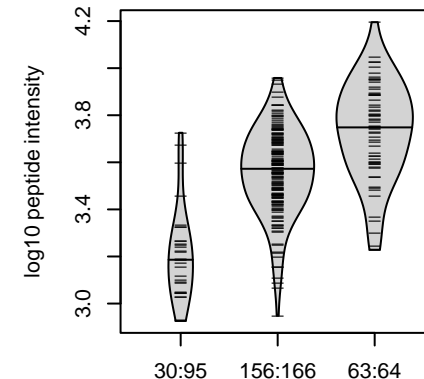

rs2333041  
 $p = 6.6e-22$ ,  $\beta = 0.92$ ,  $N = 249$

Locus: 2 (Sort: 2)  
 Status: Replicated  
 80% power: Yes  
 SNP: 3:124746182:C:A  
 rsID: rs2333041  
 UniProtID: Q9ULI3  
 HGNC gene: HEG1  
 Type: Cis-pQTL

**HSP90B1 [cis]**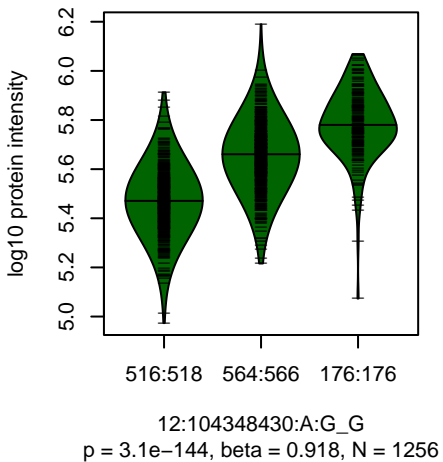**DISTNYYSQK pc2**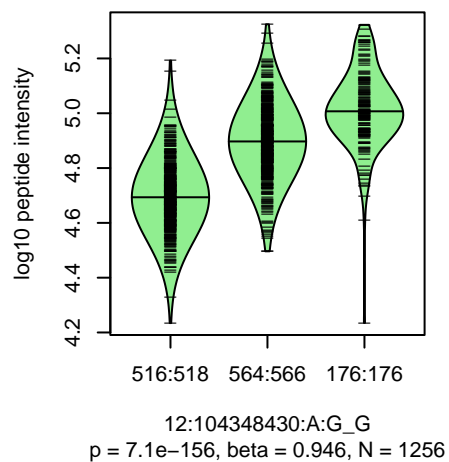**EVEEDEYK pc2**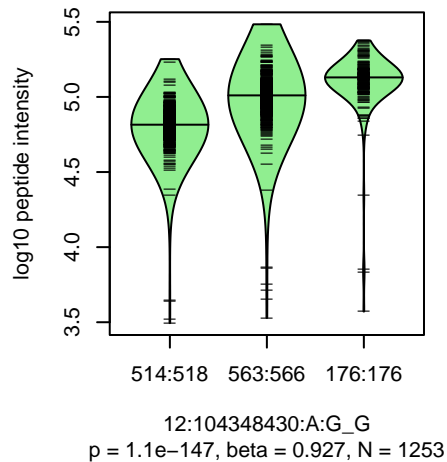**RVFITDDFHDMMPK pc3**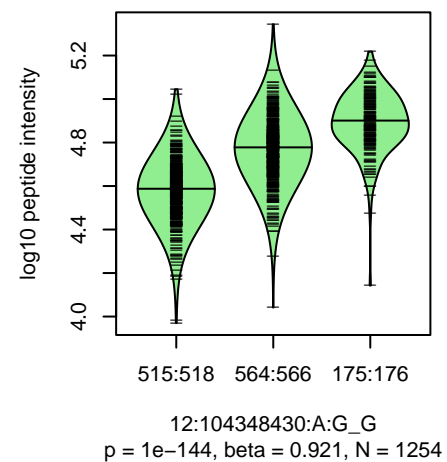**EFEPLLWMK pc2**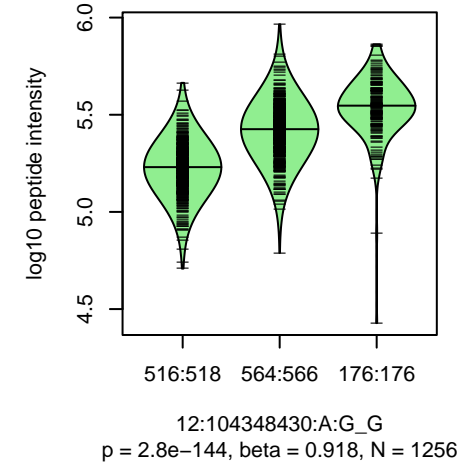**P14625 NP2**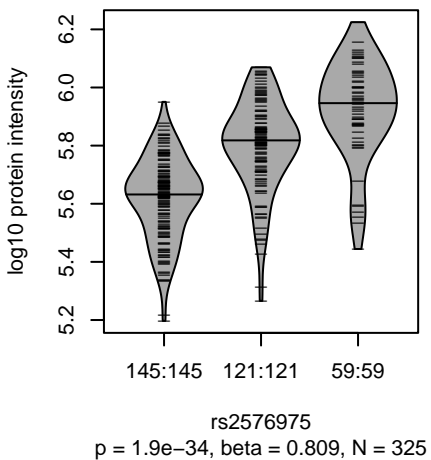**DISTNYYSQK pc2**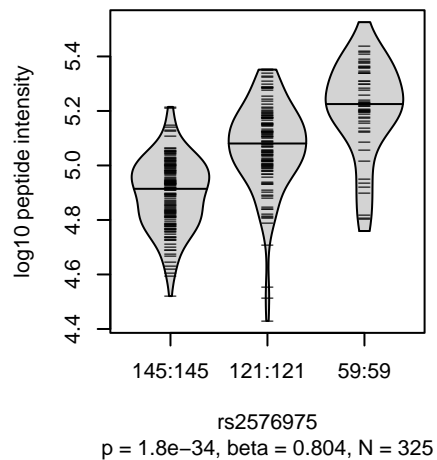**SILFVPTSAPR pc2**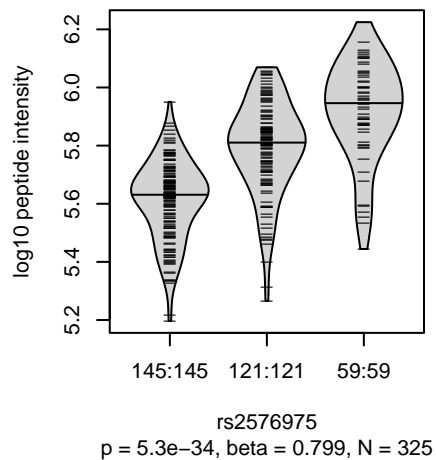**GVVDSDDLPLNVS R pc2**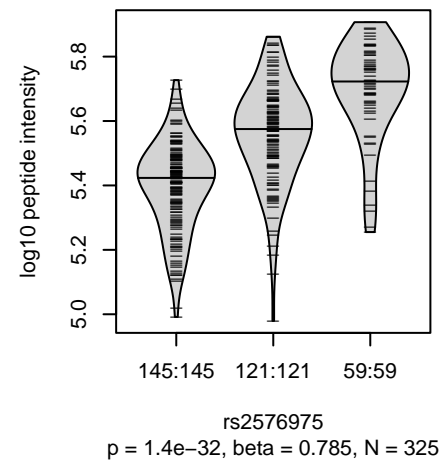**SGYLLPDTK pc2**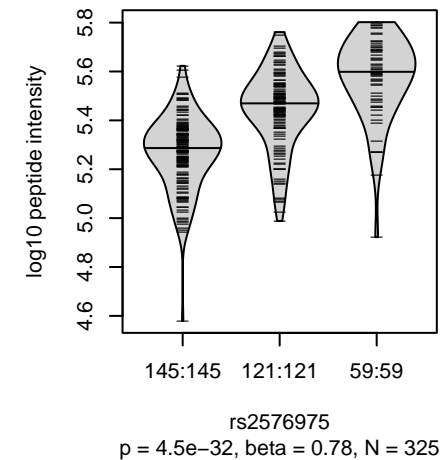

Locus: 3 (Sort: 3)  
 Status: Replicated  
 80% power: Yes  
 SNP: 12:104348430:A:G  
 rsID: rs2576975  
 UniProtID: P14625  
 HGNC gene: HSP90B1  
 Type: Cis-pQTL

**HP [cis]**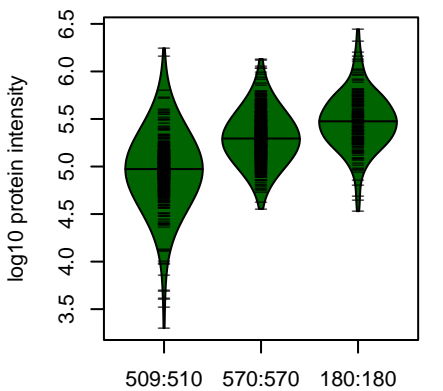

16:72088964:C:T\_T  
 $p = 1.5e-121$ ,  $\beta = 0.856$ ,  $N = 1259$

**VTSIQDWVQK pc2**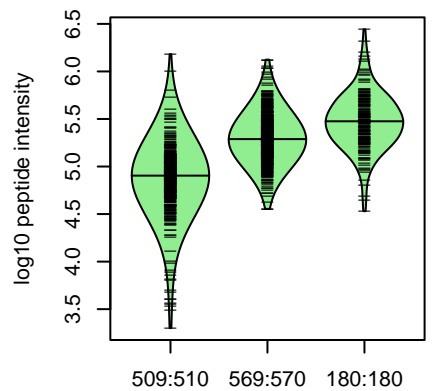

16:72088964:C:T\_T  
 $p = 2.7e-142$ ,  $\beta = 0.911$ ,  $N = 1258$

**TEGDGVYTLNNEK pc2**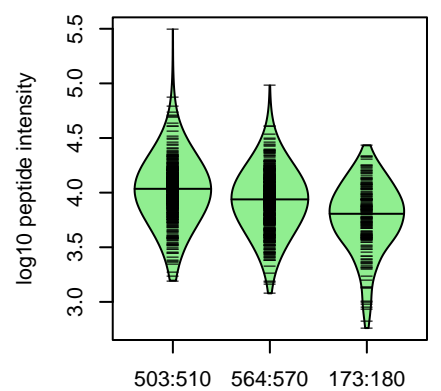

16:72088964:C:T\_T  
 $p = 2.9e-23$ ,  $\beta = -0.4$ ,  $N = 1240$

**LRTEGDGVYTLNNEK pc3**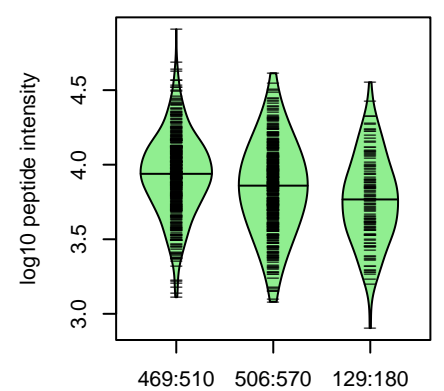

16:72088964:C:T\_T  
 $p = 1.5e-10$ ,  $\beta = -0.284$ ,  $N = 1104$

**SPVGVQPILNEHTFCAGMSK pc3**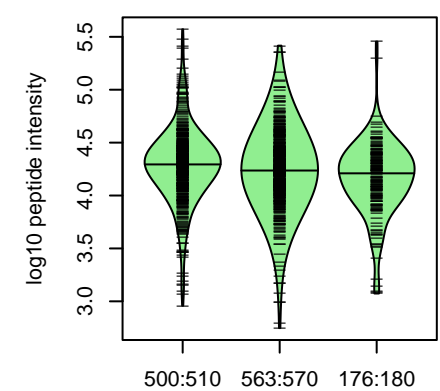

16:72088964:C:T\_T  
 $p = 1.7e-06$ ,  $\beta = -0.195$ ,  $N = 1239$

**P00738 NP4**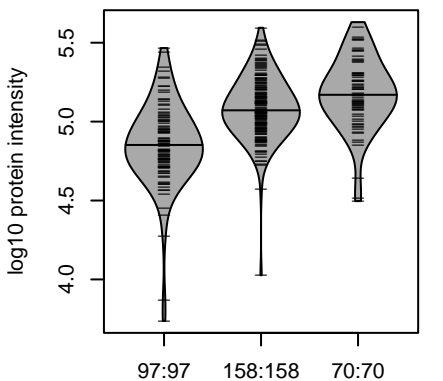

rs8062041  
 $p = 9.1e-18$ ,  $\beta = 0.633$ ,  $N = 325$

**VTSIQDWVQK pc2**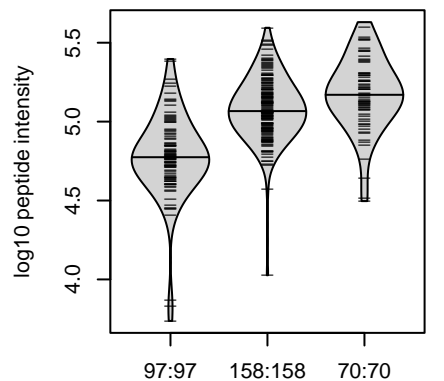

rs8062041  
 $p = 2.4e-24$ ,  $\beta = 0.725$ ,  $N = 325$

**TEGDGVYTLNNEK pc2**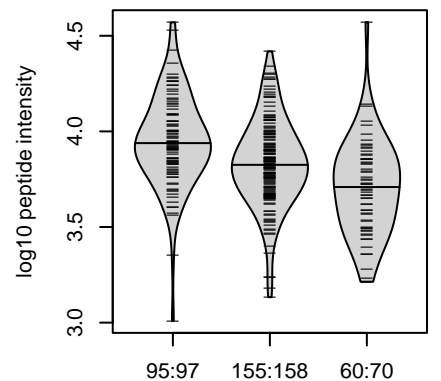

rs8062041  
 $p = 2.2e-10$ ,  $\beta = -0.494$ ,  $N = 310$

**SPVGVQPILNEHTFCAGMSK pc3**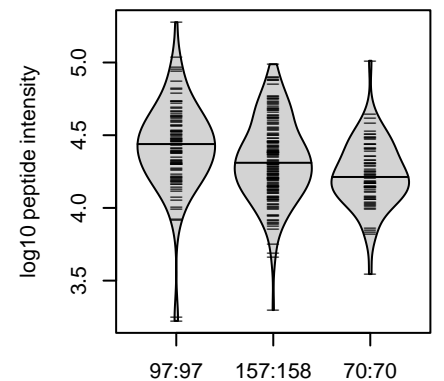

rs8062041  
 $p = 1.1e-06$ ,  $\beta = -0.369$ ,  $N = 324$

**HYEGSTVPEK pc2**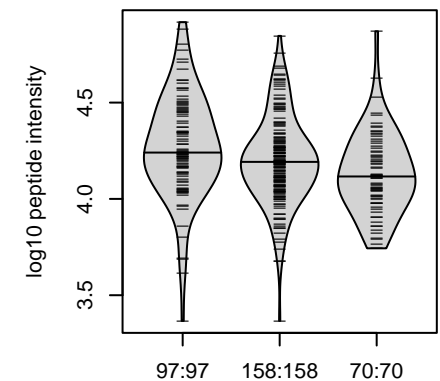

rs8062041  
 $p = 2.9e-05$ ,  $\beta = -0.318$ ,  $N = 325$

Locus: 4 (Sort: 4)  
 Status: Replicated  
 80% power: Yes  
 SNP: 16:72088964:C:T  
 rsID: rs8062041  
 UniProtID: P00738  
 HGNC gene: HP  
 Type: Cis-pQTL

**SFTPD [cis]**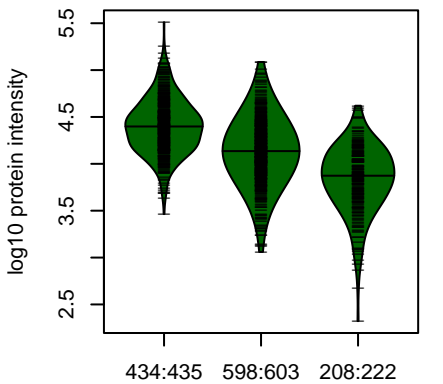

10:81706324:A:G\_G  
 $p = 1.3e-95$ ,  $\beta = -0.775$ ,  $N = 1240$

**SAAENAALQQLVVAK pc2**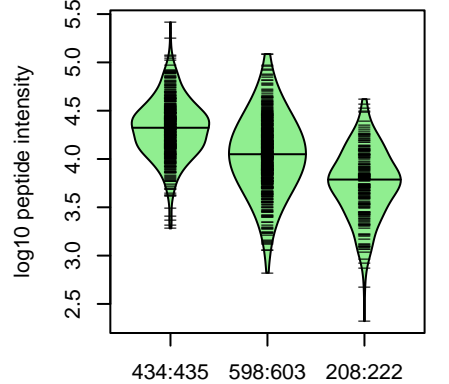

10:81706324:A:G\_G  
 $p = 4.2e-87$ ,  $\beta = -0.744$ ,  $N = 1240$

**NEAFLSMTDSK pc2**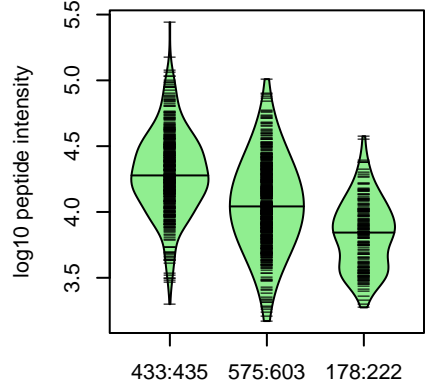

10:81706324:A:G\_G  
 $p = 7.5e-69$ ,  $\beta = -0.695$ ,  $N = 1186$

**QGNIGPQ GK pc2**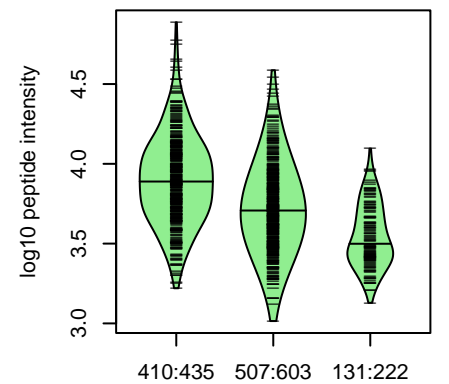

10:81706324:A:G\_G  
 $p = 1.1e-47$ ,  $\beta = -0.636$ ,  $N = 1048$

**KVELFPNGQSVGEK pc3**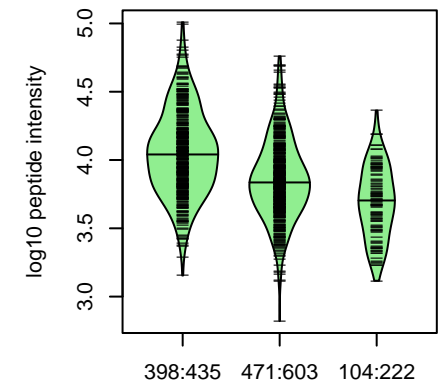

10:81706324:A:G\_G  
 $p = 4.8e-38$ ,  $\beta = -0.605$ ,  $N = 973$

**P35247 NP5**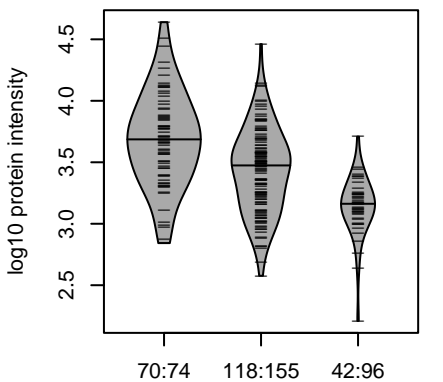

rs721917  
 $p = 3.6e-10$ ,  $\beta = -0.574$ ,  $N = 230$

**SAAENAALQQLVVAK pc2**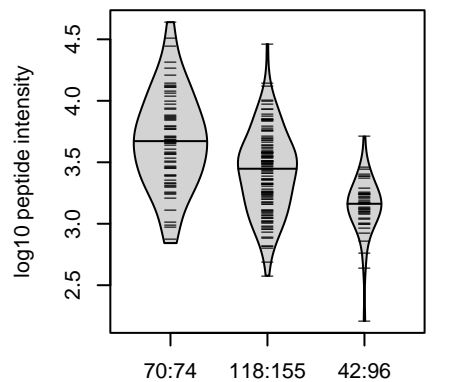

rs721917  
 $p = 7e-10$ ,  $\beta = -0.559$ ,  $N = 230$

**NEAFLSMTDSK pc2**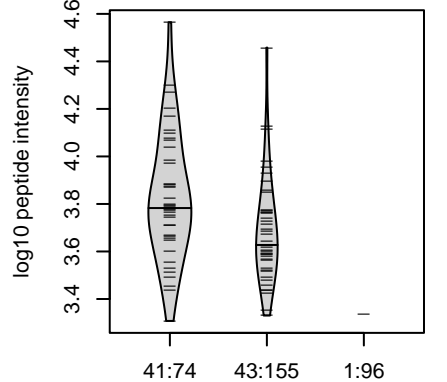

rs721917  
 $p = 0.078$ ,  $\beta = -0.351$ ,  $N = 85$

**PFTEAQLLCTQAGGQLATPR pc3  
rs3088308 ALT**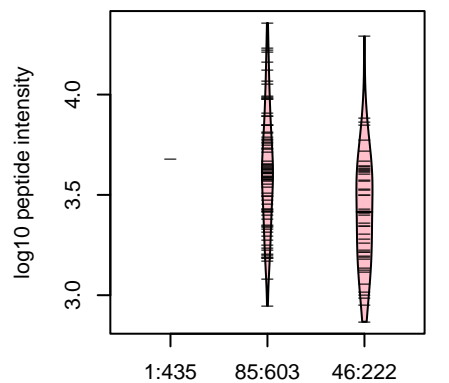

10:81706324:A:G\_G  
 $p = 1e-24$ ,  $\text{model} = \text{REC}$ ,  $N = 132$

**PFTEAQLLCTQAGGQLASPR pc3  
rs3088308 REF**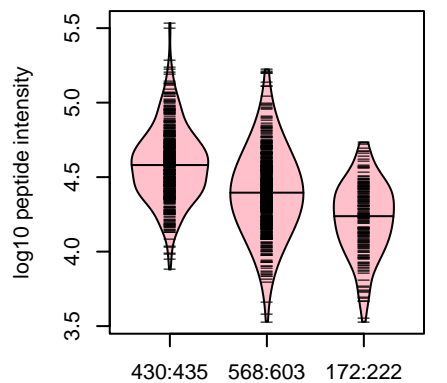

10:81706324:A:G\_G  
 $p = 1.8e-17$ ,  $\text{model} = \text{DOM}$ ,  $N = 1170$

Locus: 5 (Sort: 5)  
 Status: Replicated  
 80% power: Yes  
 SNP: 10:81706324:A:G  
 rsID: rs721917  
 UniProtID: P35247  
 HGNC gene: SFTPD  
 Type: Cis-pQTL

**PON2 [cis]**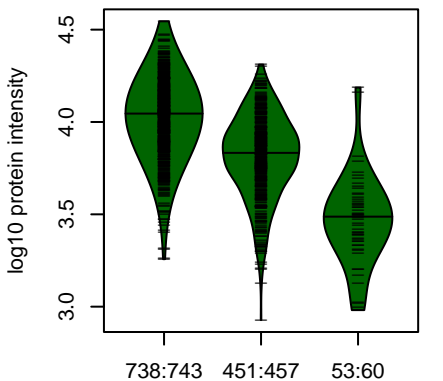

7:95030632:A:C\_C  
 $p = 2.3e-91$ ,  $\beta = -0.916$ ,  $N = 1242$

**YIYVADILAHEIHVLEK pc3**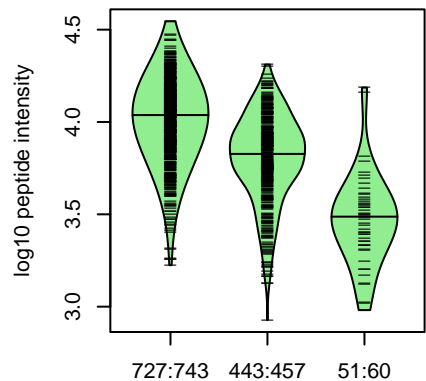

7:95030632:A:C\_C  
 $p = 7.1e-81$ ,  $\beta = -0.878$ ,  $N = 1221$

**EVESVDLPHCHLIK pc3**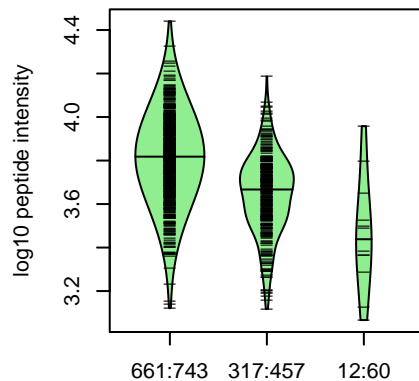

7:95030632:A:C\_C  
 $p = 1.2e-45$ ,  $\beta = -0.853$ ,  $N = 990$

**LFVYDPNPPSSEVLR pc2**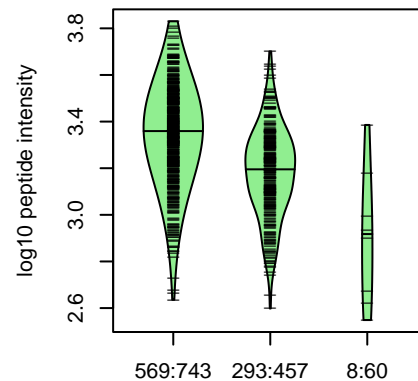

7:95030632:A:C\_C  
 $p = 8.2e-35$ ,  $\beta = -0.799$ ,  $N = 870$

**LLIGTLYHR pc2**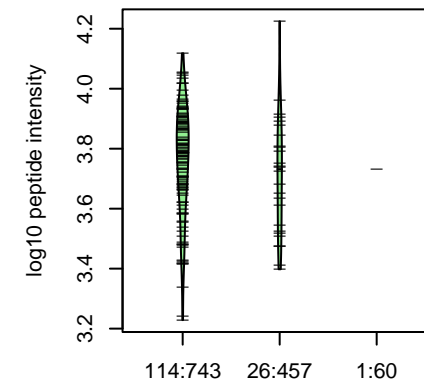

7:95030632:A:C\_C  
 $p = 0.17$ ,  $\beta = -0.271$ ,  $N = 141$

**A0A0J9YXF2 NP5**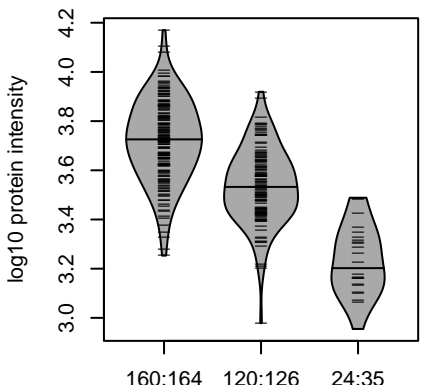

rs17879277  
 $p = 8.4e-36$ ,  $\beta = -0.979$ ,  $N = 304$

**YIYVADILAHEIHVLEK pc3**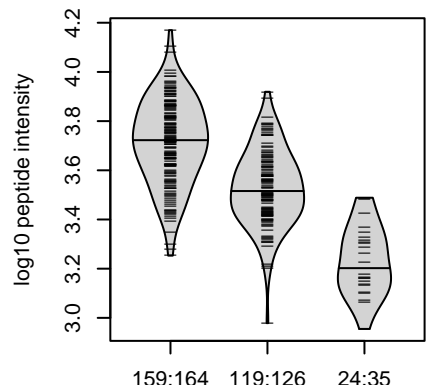

rs17879277  
 $p = 3.3e-34$ ,  $\beta = -0.966$ ,  $N = 302$

**LFVYDPNPPSSEVLR pc2**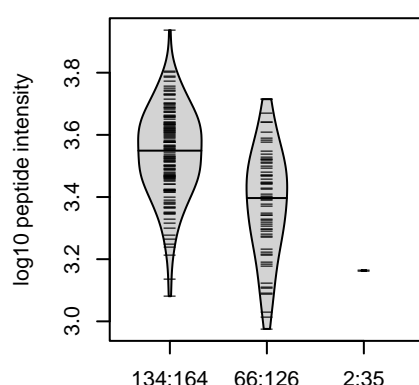

rs17879277  
 $p = 1.5e-12$ ,  $\beta = -0.927$ ,  $N = 202$

**FEEAENSLHLK pc3  
rs12026 REF**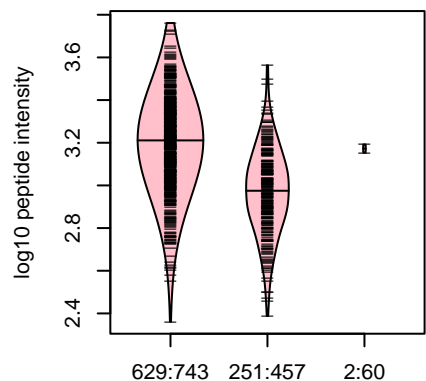

7:95030632:A:C\_C  
 $p = 4.9e-42$ ,  $\text{model} = \text{REC}$ ,  $N = 882$

**IQNILSEK pc2  
rs7493 REF**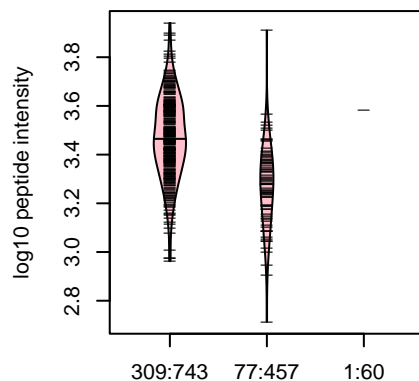

7:95030632:A:C\_C  
 $p = 6.8e-25$ ,  $\text{model} = \text{REC}$ ,  $N = 387$

Locus: 6 (Sort: 6)  
 Status: Replicated  
 80% power: Yes  
 SNP: 7:95030632:A:C  
 rsID: rs17879277  
 UniProtID: A0A0J9YXF2  
 HGNC gene: PON2  
 Type: Cis-pQTL

**MST1 [cis]**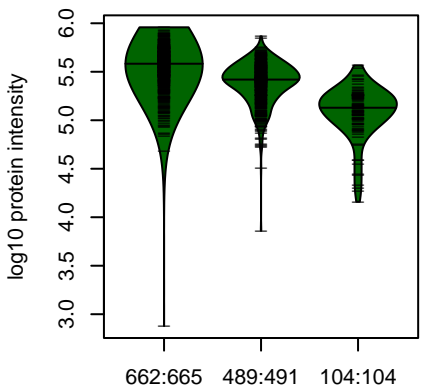

3:49721532:G:A\_A  
 $p = 4.1e-87$ ,  $\beta = -0.802$ ,  $N = 1255$

**VVGGHPGNSPWTVSLR pc3**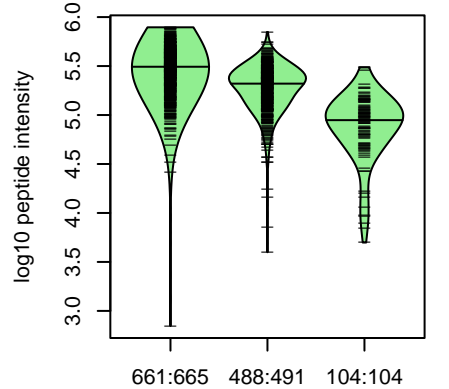

3:49721532:G:A\_A  
 $p = 9.9e-84$ ,  $\beta = -0.789$ ,  $N = 1253$

**MVCGPSGSQVLVLLK pc2**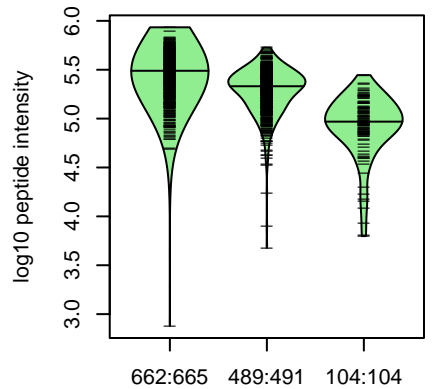

3:49721532:G:A\_A  
 $p = 1.1e-80$ ,  $\beta = -0.776$ ,  $N = 1255$

**TPFDYCALR pc2**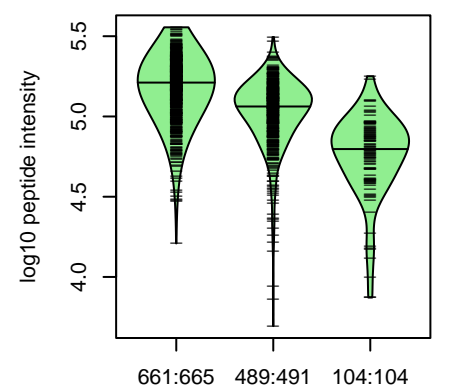

3:49721532:G:A\_A  
 $p = 6.1e-77$ ,  $\beta = -0.76$ ,  $N = 1254$

**CEIAGWGETK pc2**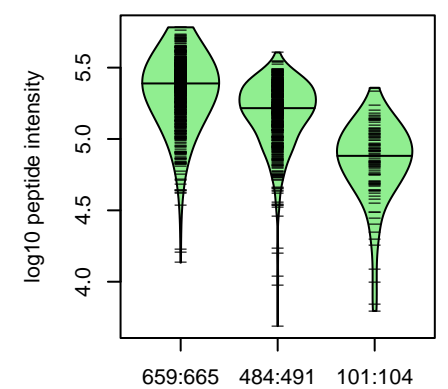

3:49721532:G:A\_A  
 $p = 1.8e-76$ ,  $\beta = -0.763$ ,  $N = 1244$

**G3XAK1 NP3**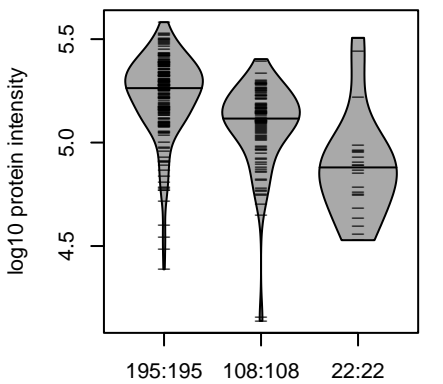

rs3197999  
 $p = 1.6e-17$ ,  $\beta = -0.699$ ,  $N = 325$

**CEIAGWGETK pc2**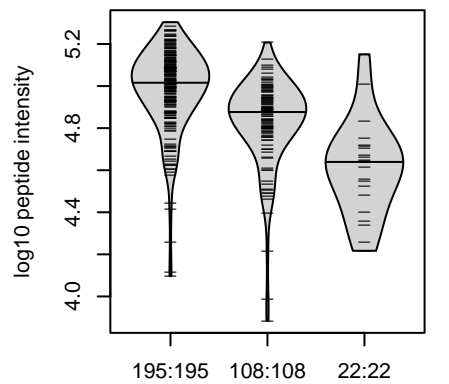

rs3197999  
 $p = 1.3e-19$ ,  $\beta = -0.753$ ,  $N = 325$

**QEATTVSCFR pc2**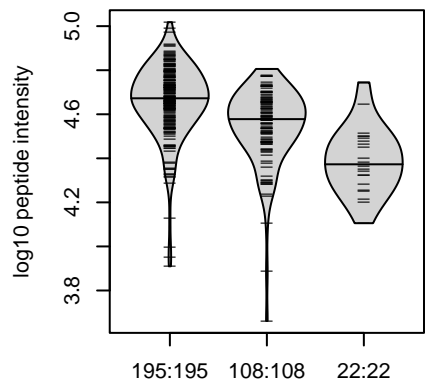

rs3197999  
 $p = 1.2e-16$ ,  $\beta = -0.695$ ,  $N = 325$

**VVGGHPGNSPWTVSLR pc3**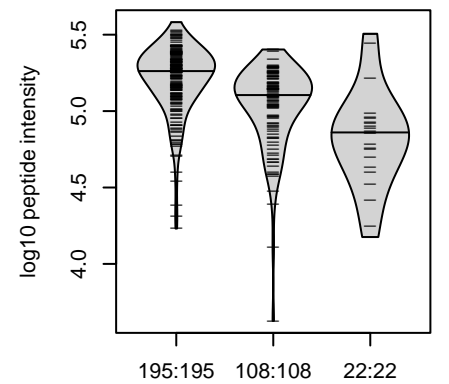

rs3197999  
 $p = 1.8e-16$ ,  $\beta = -0.691$ ,  $N = 325$

**MVCGPSGSQVLVLLK pc2**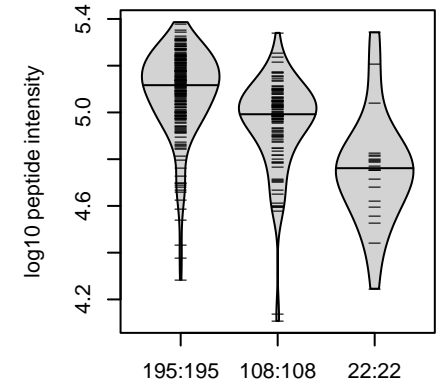

rs3197999  
 $p = 2.7e-16$ ,  $\beta = -0.688$ ,  $N = 325$

Locus: 7 (Sort: 7)  
 Status: Replicated  
 80% power: Yes  
 SNP: 3:49721532:G:A  
 rsID: rs3197999  
 UniProtID: G3XAK1  
 HGNC gene: MST1  
 Type: Cis-pQTL

**SCWPAVFTR pc2  
rs3197999 ALT**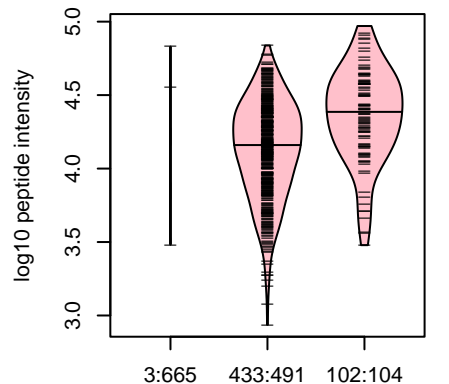

3:49721532:G:A\_A  
 $p = 1.3e-281$ ,  $\text{model} = \text{REC}$ ,  $N = 538$

**WPAVFTR pc2  
rs3197999 REF**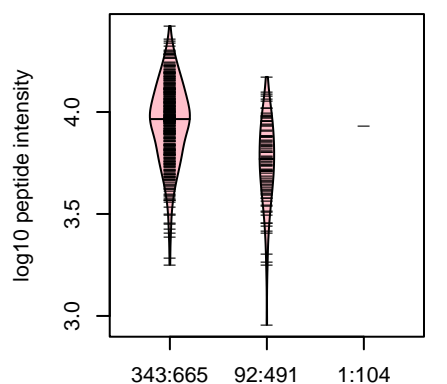

3:49721532:G:A\_A  
 $p = 1.9e-42$ ,  $\text{model} = \text{REC}$ ,  $N = 436$

**VMO1 [cis]**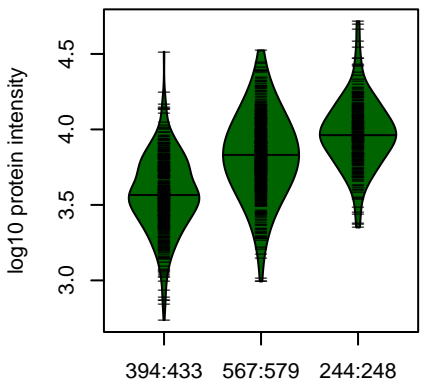

17:4690296:T:C\_C  
 $p = 1.8e-84$ ,  $\beta = 0.722$ ,  $N = 1205$

**GLGDDTALNDAR pc2**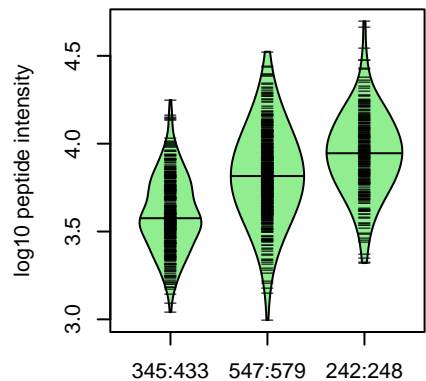

17:4690296:T:C\_C  
 $p = 5.6e-66$ ,  $\beta = 0.667$ ,  $N = 1134$

**VEAPTTLGDNTAANNVR pc2**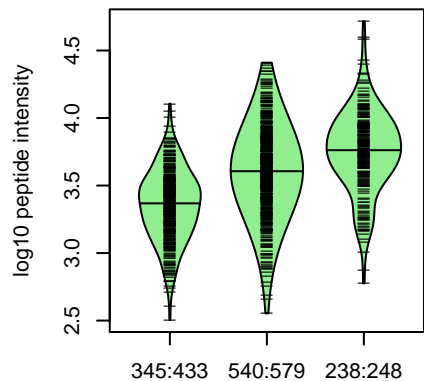

17:4690296:T:C\_C  
 $p = 1e-52$ ,  $\beta = 0.604$ ,  $N = 1123$

**GACGLQTK pc2**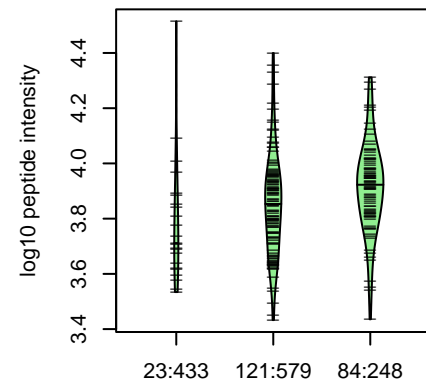

17:4690296:T:C\_C  
 $p = 0.00023$ ,  $\beta = 0.376$ ,  $N = 228$

**GGAYLVAFSLR pc2**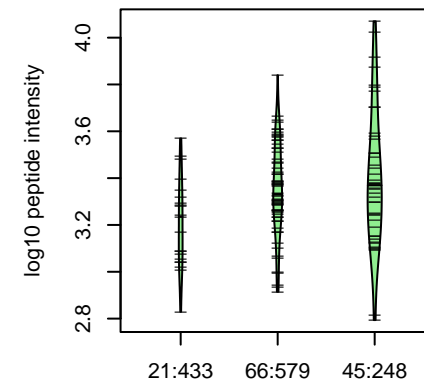

17:4690296:T:C\_C  
 $p = 0.0038$ ,  $\beta = 0.355$ ,  $N = 132$

**Q7Z5L0 NP2**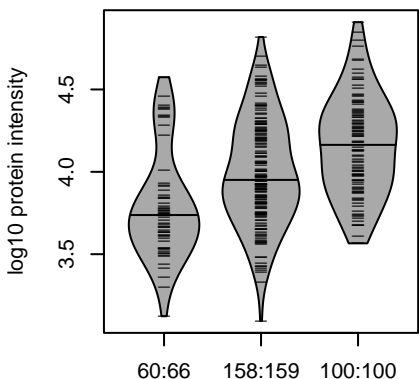

rs8068141  
 $p = 4.5e-12$ ,  $\beta = 0.524$ ,  $N = 318$

**GLGDDTALNDAR pc2**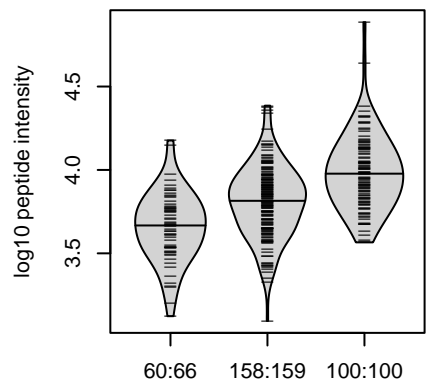

rs8068141  
 $p = 3.8e-20$ ,  $\beta = 0.684$ ,  $N = 318$

**VEAPTTLGDNTAANNVR pc2**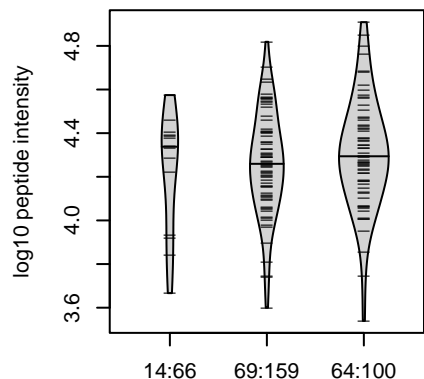

rs8068141  
 $p = 0.12$ ,  $\beta = 0.193$ ,  $N = 147$

Locus: 8 (Sort: 8)  
 Status: Replicated  
 80% power: Yes  
 SNP: 17:4690296:T:C  
 rsID: rs8068141  
 UniProtID: Q7Z5L0  
 HGNC gene: VMO1  
 Type: Cis-pQTL



**MBL2 [cis]**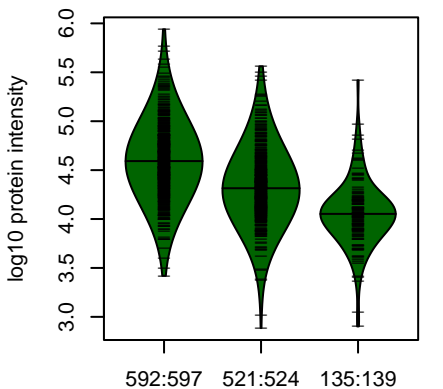

10:54536839:T:G\_T  
 $p = 9.4e-81$ ,  $\beta = -0.746$ ,  $N = 1248$

**TEGQFVDLTG NR pc2**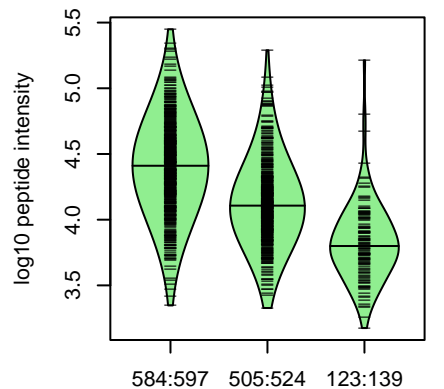

10:54536839:T:G\_T  
 $p = 7.2e-90$ ,  $\beta = -0.801$ ,  $N = 1212$

**WLTFSLGK pc2**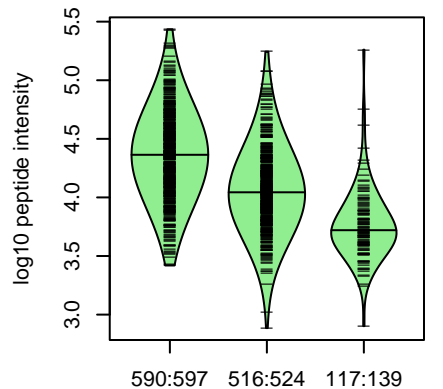

10:54536839:T:G\_T  
 $p = 1.8e-89$ ,  $\beta = -0.805$ ,  $N = 1223$

**EEAFLGITDEK pc2**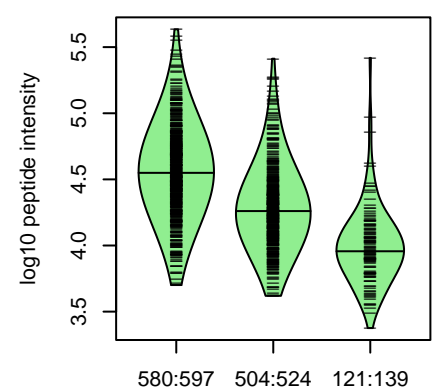

10:54536839:T:G\_T  
 $p = 2.3e-89$ ,  $\beta = -0.802$ ,  $N = 1205$

**FFLTNGEIMTFEK pc2**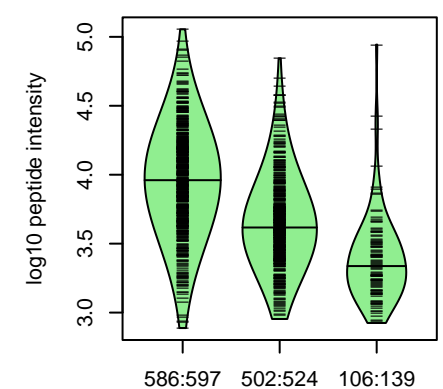

10:54536839:T:G\_T  
 $p = 3.8e-79$ ,  $\beta = -0.781$ ,  $N = 1194$

**P11226 NP2**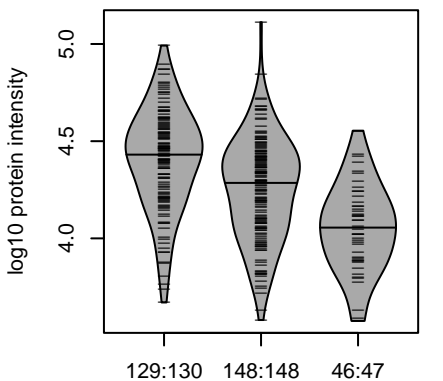

rs7899547  
 $p = 4.5e-13$ ,  $\beta = -0.556$ ,  $N = 323$

**EEAFLGITDEK pc2**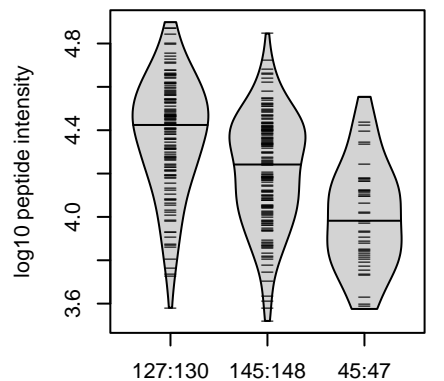

rs7899547  
 $p = 5.3e-14$ ,  $\beta = -0.579$ ,  $N = 317$

**TEGQFVDLTG NR pc2**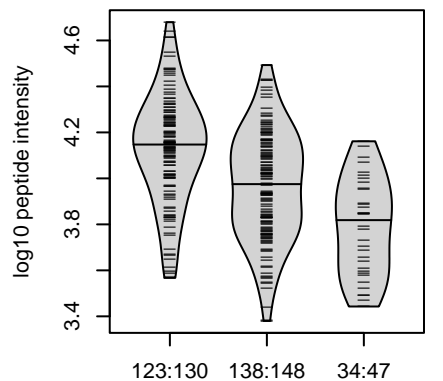

rs7899547  
 $p = 3.8e-13$ ,  $\beta = -0.601$ ,  $N = 295$

**WLTFSLGK pc2**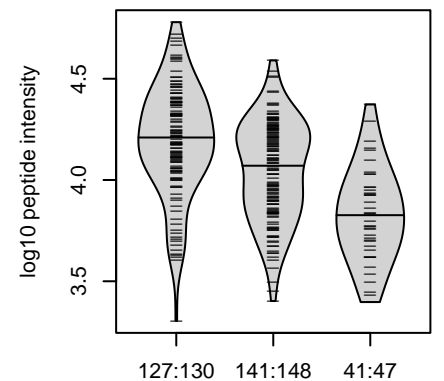

rs7899547  
 $p = 4.8e-13$ ,  $\beta = -0.571$ ,  $N = 309$

**FQASVATPR pc2**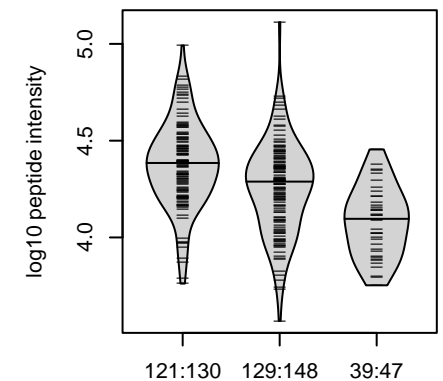

rs7899547  
 $p = 6.4e-11$ ,  $\beta = -0.532$ ,  $N = 289$

Locus: 9 (Sort: 9)  
 Status: Replicated  
 80% power: Yes  
 SNP: 10:54536839:T:G  
 rsID: rs7899547  
 UniProtID: P11226  
 HGNC gene: MBL2  
 Type: Cis-pQTL

**GGTA1P [cis]**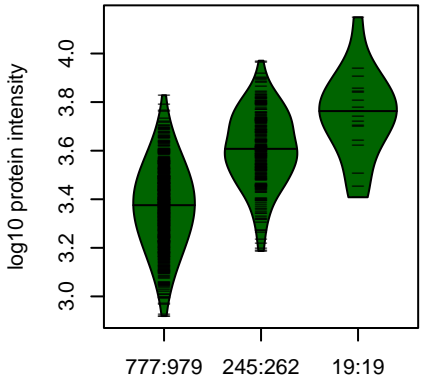

9:124225598:C:T\_T  
 $p = 3.5e-79$ ,  $\beta = 1.1$ ,  $N = 1041$

**NPEVDDSSAQK pc2**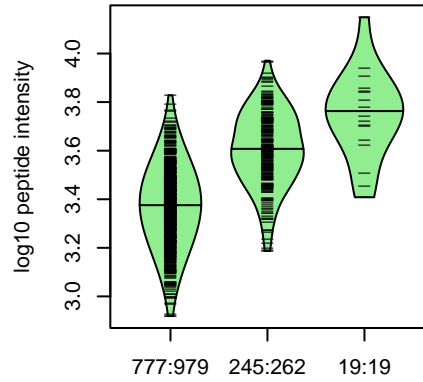

9:124225598:C:T\_T  
 $p = 3.5e-79$ ,  $\beta = 1.1$ ,  $N = 1041$

**Q4G0N0 NP2**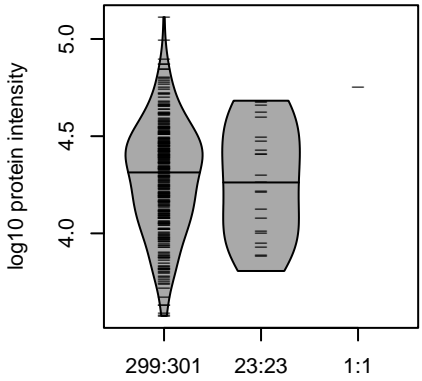

rs77378583  
 $p = 0.85$ ,  $\beta = 0.038$ ,  $N = 323$

**FFLTNGEIMTFEK pc2**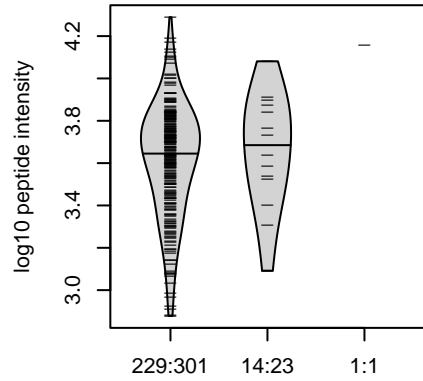

rs77378583  
 $p = 0.13$ ,  $\beta = 0.361$ ,  $N = 244$

**TEGQFVDLTGNR pc2**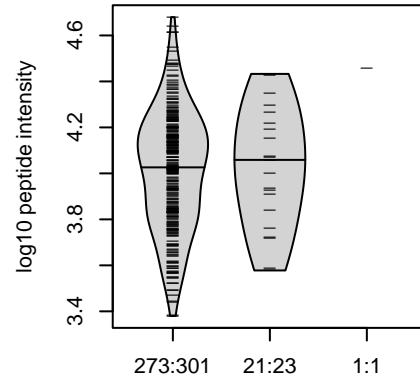

rs77378583  
 $p = 0.34$ ,  $\beta = 0.196$ ,  $N = 295$

**WLTFSLGK pc2**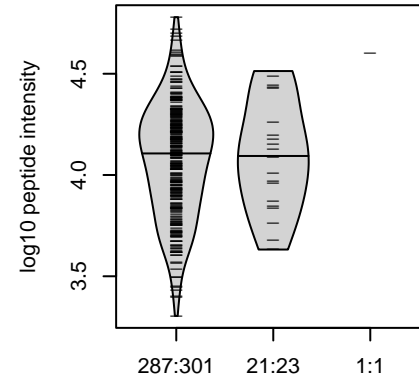

rs77378583  
 $p = 0.41$ ,  $\beta = 0.17$ ,  $N = 309$

**SPGDSSLAASER pc2**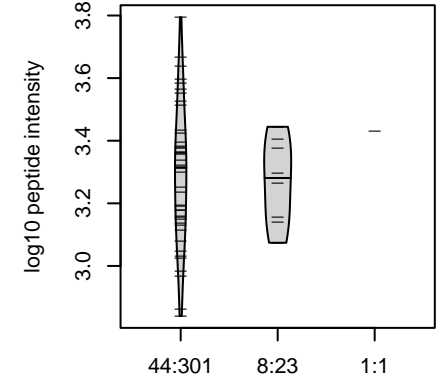

rs77378583  
 $p = 0.71$ ,  $\beta = -0.113$ ,  $N = 53$

Locus: 10 (Sort: 10)  
 Status: Not replicated  
 80% power: Yes  
 SNP: 9:124225598:C:T  
 rsID: rs77378583  
 UniProtID: Q4G0N0  
 HGNC gene: GGTA1P  
 Type: Cis-pQTL

**FN3K [cis]**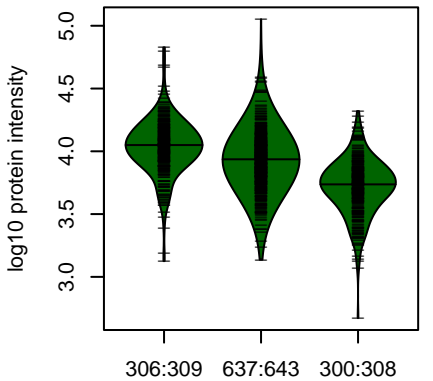

17:80693899:C:T\_T  
 $p = 6e-70$ ,  $\beta = -0.673$ ,  $N = 1243$

**AYDTDAGPVFVK pc2**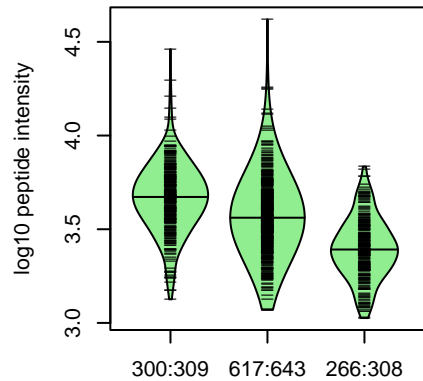

17:80693899:C:T\_T  
 $p = 4.4e-66$ ,  $\beta = -0.677$ ,  $N = 1183$

**VIDLPGGGAAFVMEHLK pc3**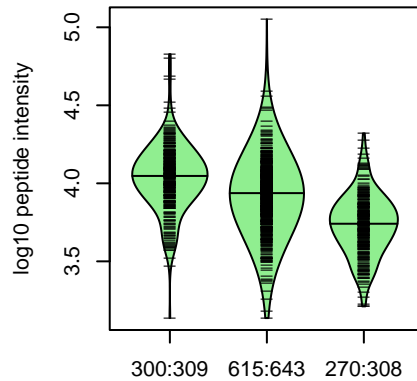

17:80693899:C:T\_T  
 $p = 1.9e-62$ ,  $\beta = -0.657$ ,  $N = 1185$

**QMFEGEVASLEALR pc2**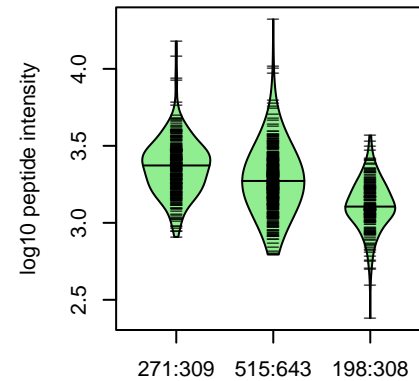

17:80693899:C:T\_T  
 $p = 1.4e-47$ ,  $\beta = -0.635$ ,  $N = 984$

**SPSLGTMR pc2**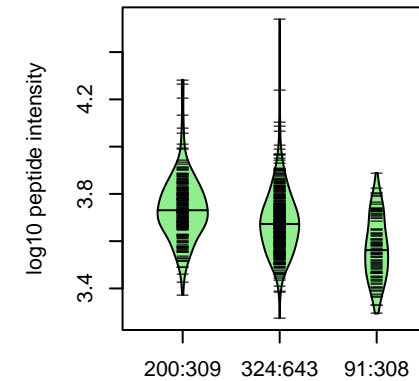

17:80693899:C:T\_T  
 $p = 5.6e-22$ ,  $\beta = -0.559$ ,  $N = 615$

**Q9H479 NP1**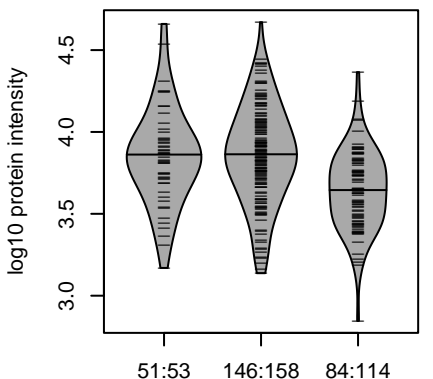

rs3848403  
 $p = 1.3e-06$ ,  $\beta = -0.412$ ,  $N = 281$

**VIDLPGGGAAFVMEHLK pc3**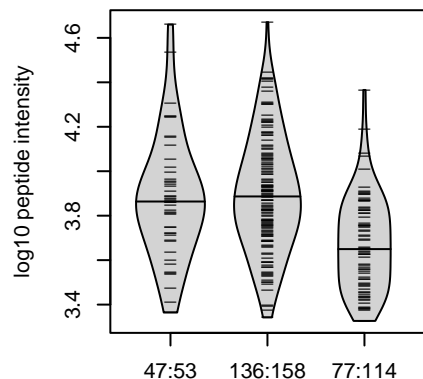

rs3848403  
 $p = 2.3e-07$ ,  $\beta = -0.453$ ,  $N = 260$

**AYDTDAGPVFVK pc2**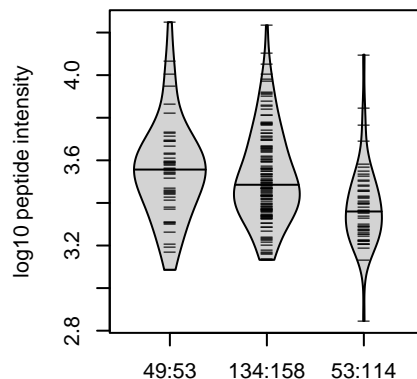

rs3848403  
 $p = 2.8e-05$ ,  $\beta = -0.401$ ,  $N = 236$

**LGEQMADLHLYNQK pc3**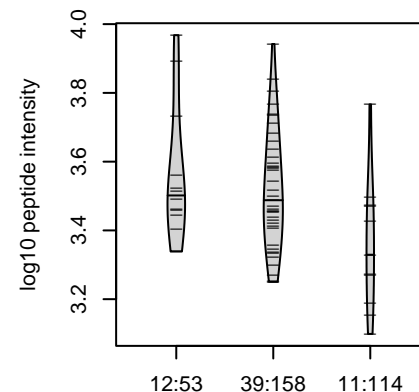

rs3848403  
 $p = 0.0084$ ,  $\beta = -0.514$ ,  $N = 62$

**SPSLGTMR pc2**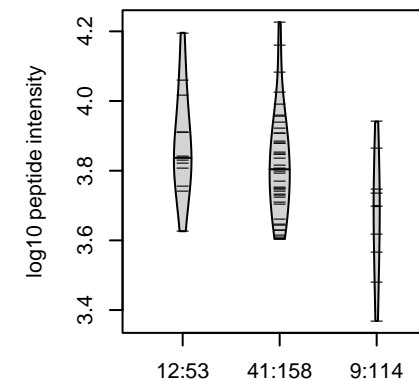

rs3848403  
 $p = 0.033$ ,  $\beta = -0.441$ ,  $N = 62$

Locus: 11 (Sort: 11)  
 Status: Replicated  
 80% power: Yes  
 SNP: 17:80693899:C:T  
 rsID: rs3848403  
 UniProtID: Q9H479  
 HGNC gene: FN3K  
 Type: Cis-pQTL

**CHI3L1 [cis]**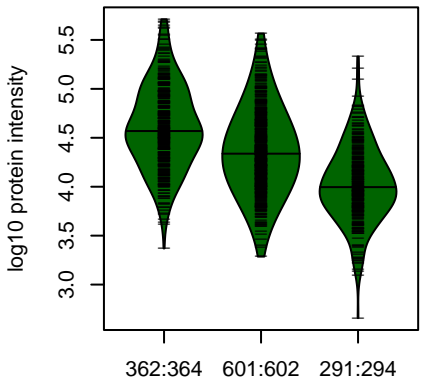

1:203152801:T:C\_C  
 $p = 5.6e-69$ ,  $\beta = -0.646$ ,  $N = 1254$

**QLLSAALSAGK pc2**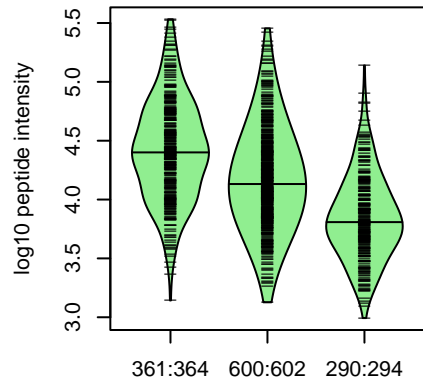

1:203152801:T:C\_C  
 $p = 1.7e-65$ ,  $\beta = -0.632$ ,  $N = 1251$

**LVMGIPTFGR pc2**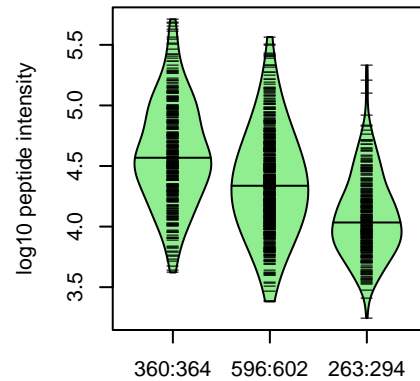

1:203152801:T:C\_C  
 $p = 4.3e-59$ ,  $\beta = -0.617$ ,  $N = 1219$

**TLLSVGGWNFGSQR pc2**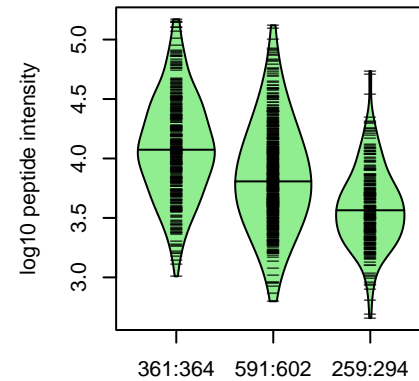

1:203152801:T:C\_C  
 $p = 2.1e-52$ ,  $\beta = -0.585$ ,  $N = 1211$

**GNQWVGYYDDQESVK pc2**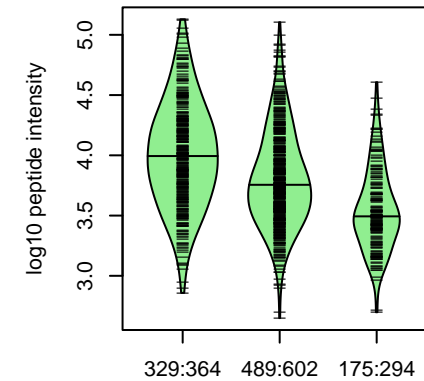

1:203152801:T:C\_C  
 $p = 2.1e-32$ ,  $\beta = -0.52$ ,  $N = 993$

**P36222 NP1**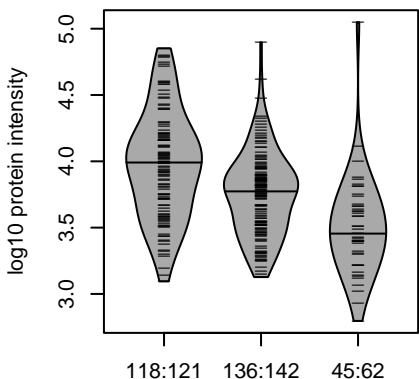

rs880633  
 $p = 1.2e-15$ ,  $\beta = -0.617$ ,  $N = 299$

**QLLSAALSAGK pc2**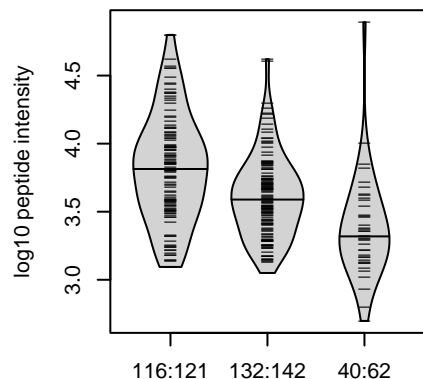

rs880633  
 $p = 2.3e-14$ ,  $\beta = -0.615$ ,  $N = 288$

**LVMGIPTFGR pc2**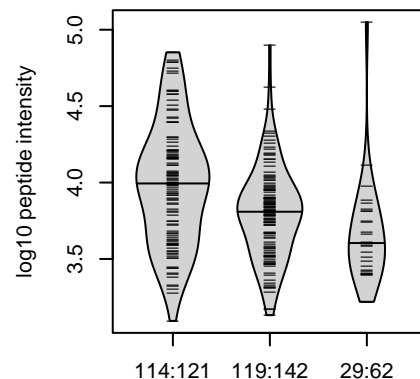

rs880633  
 $p = 3.2e-08$ ,  $\beta = -0.493$ ,  $N = 262$

**ILGQVPYATK pc2**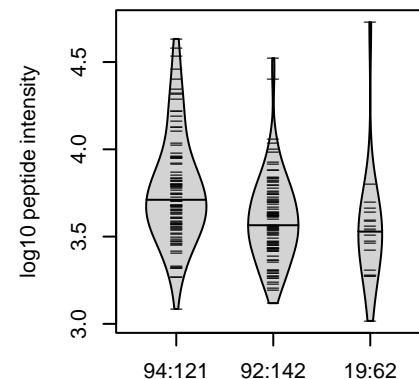

rs880633  
 $p = 1.2e-06$ ,  $\beta = -0.501$ ,  $N = 205$

**TLLSVGGWNFGSQR pc2**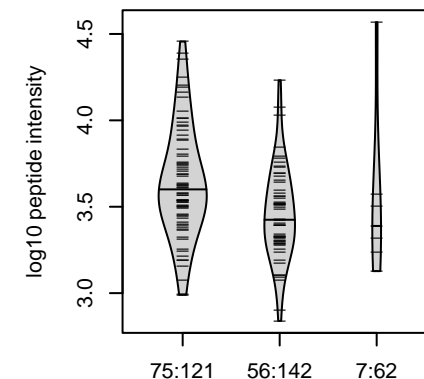

rs880633  
 $p = 0.00042$ ,  $\beta = -0.485$ ,  $N = 138$

**THGFDGLDLAWLYPGRR pc3  
rs880633 REF**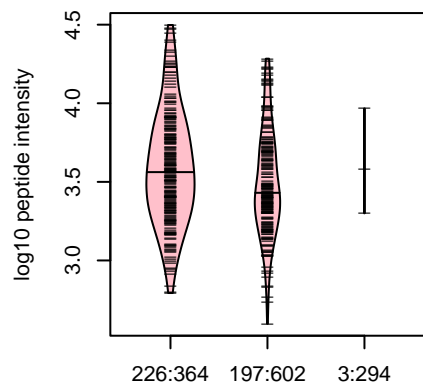

1:203152801:T:C\_C  
 $p = 1.6e-56$ ,  $\text{model} = \text{DOM}$ ,  $N = 426$

**THGFDGLDLAWLYPGRGDK pc3  
rs880633 ALT**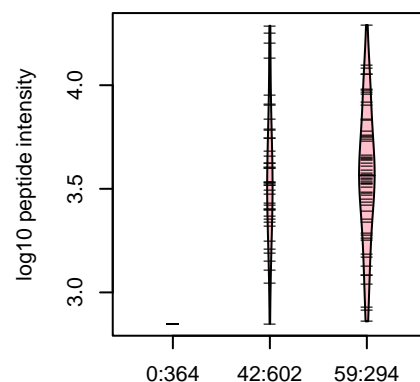

1:203152801:T:C\_C  
 $p = 2.6e-16$ ,  $\text{model} = \text{REC}$ ,  $N = 101$

Locus: 12 (Sort: 12)  
 Status: Replicated  
 80% power: Yes  
 SNP: 1:203152801:T:C  
 rsID: rs880633  
 UniProtID: P36222  
 HGNC gene: CHI3L1  
 Type: Cis-pQTL

**AMBP [trans]**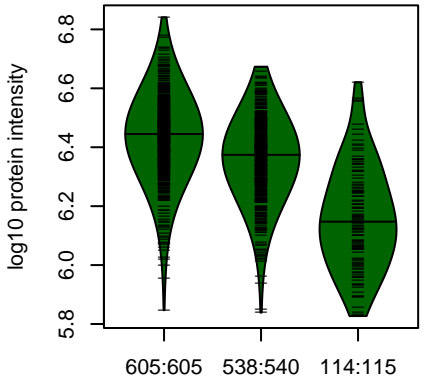

3:126261345:G:A\_A  
 $p = 3.9e-68$ ,  $\beta = -0.713$ ,  $N = 1257$

**ECLQTCR pc2**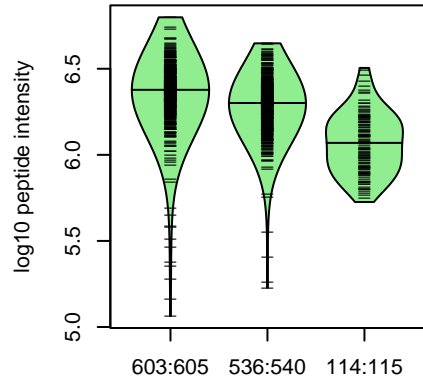

3:126261345:G:A\_A  
 $p = 9.6e-59$ ,  $\beta = -0.667$ ,  $N = 1253$

**AFIQLWAFDAVK pc2**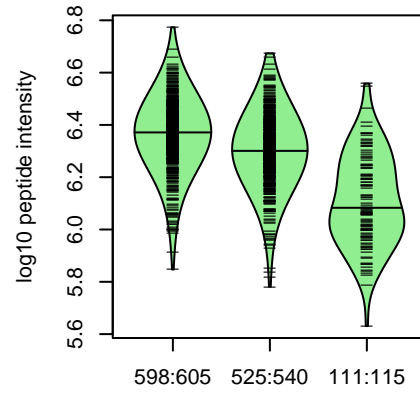

3:126261345:G:A\_A  
 $p = 1.6e-54$ ,  $\beta = -0.649$ ,  $N = 1234$

**EYCGVPGDGDELLR pc2**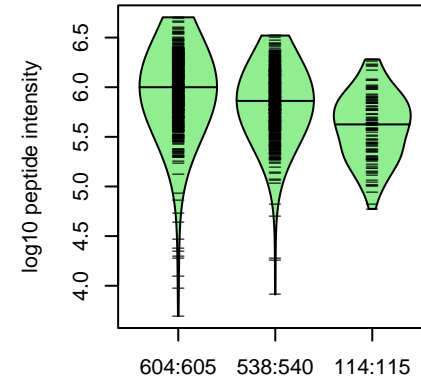

3:126261345:G:A\_A  
 $p = 1.9e-29$ ,  $\beta = -0.477$ ,  $N = 1256$

**TVAACNLPIVR pc2**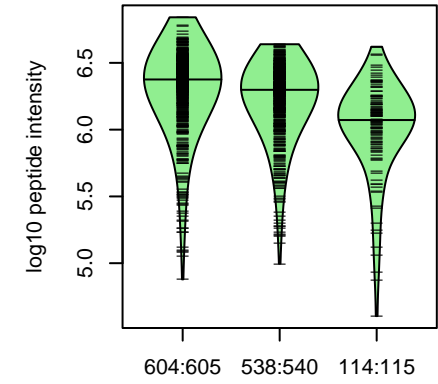

3:126261345:G:A\_A  
 $p = 8.4e-25$ ,  $\beta = -0.437$ ,  $N = 1256$

**P02760 NP2**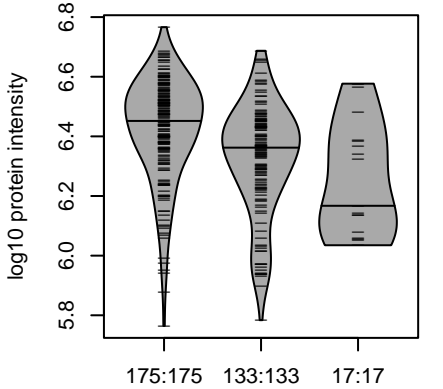

rs1056522  
 $p = 1.6e-08$ ,  $\beta = -0.514$ ,  $N = 325$

**ECLQTCR pc2**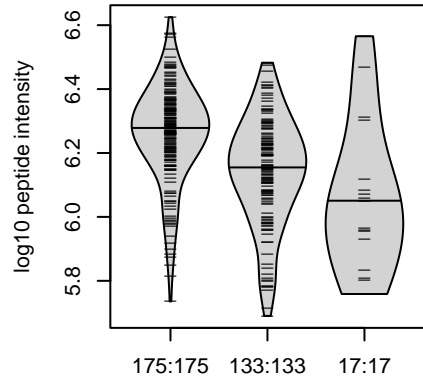

rs1056522  
 $p = 9.7e-12$ ,  $\beta = -0.605$ ,  $N = 325$

**AFIQLWAFDAVK pc2**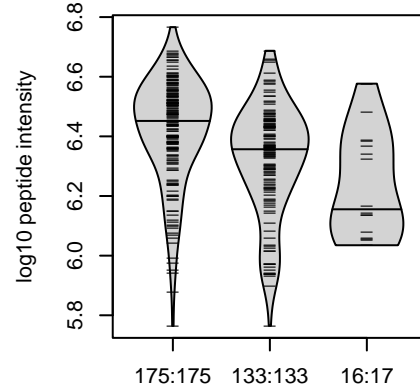

rs1056522  
 $p = 9.4e-09$ ,  $\beta = -0.521$ ,  $N = 324$

**EYCGVPGDGDELLR pc2**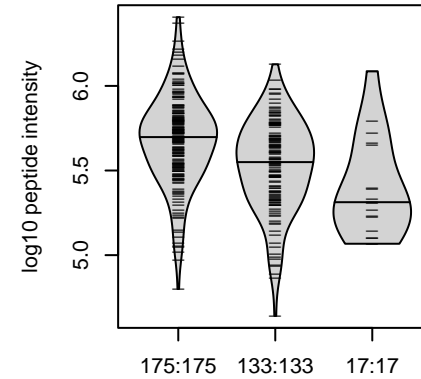

rs1056522  
 $p = 9.8e-09$ ,  $\beta = -0.515$ ,  $N = 325$

**TVAACNLPIVR pc2**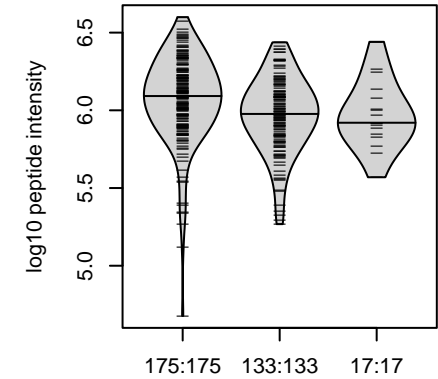

rs1056522  
 $p = 9.4e-05$ ,  $\beta = -0.355$ ,  $N = 325$

Locus: 13 (Sort: 13)  
 Status: Replicated  
 80% power: Yes  
 SNP: 3:126261345:G:A  
 rsID: rs1056522  
 UniProtID: P02760  
 HGNC gene: AMBP  
 Type: Trans-pQTL

**CCDC132 [trans]**

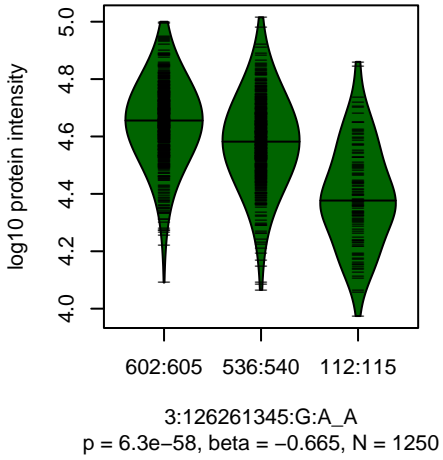

**ALWEVMLSYYR pc2**

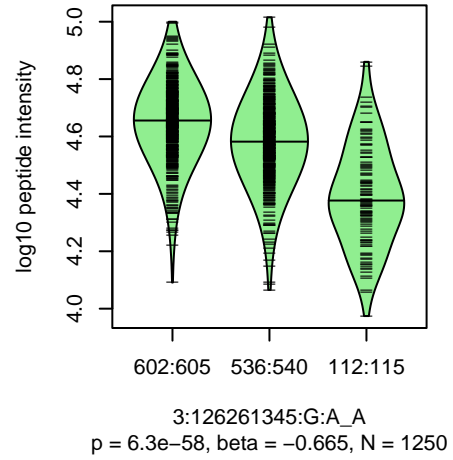

**Q96JG6 NP2**

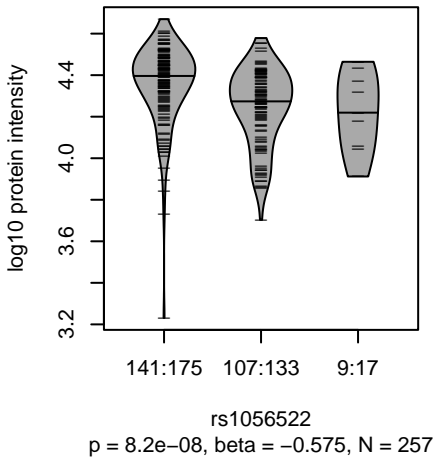

**ALWEVMLSYYR pc2**

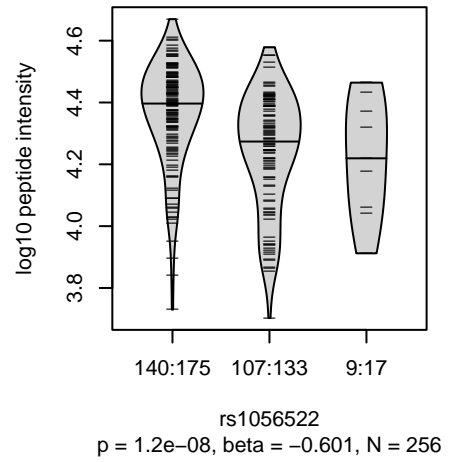

Locus: 13 (Sort: 14)  
Status: Replicated  
80% power: Yes  
SNP: 3:126261345:G:A  
rsID: rs1056522  
UniProtID: Q96JG6  
HGNC gene: CCDC132  
Type: Trans-pQTL

**ITIH1 [trans]**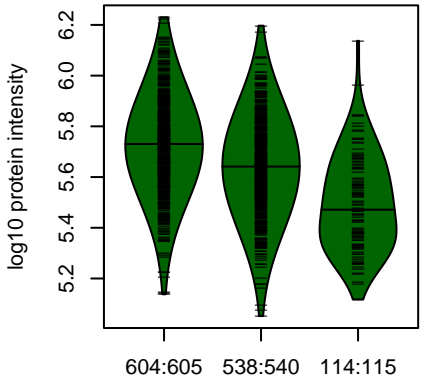

3:126261345:G:A\_A  
 $p = 3.4e-35$ ,  $\beta = -0.521$ ,  $N = 1256$

**NHMQYEIVIK pc2**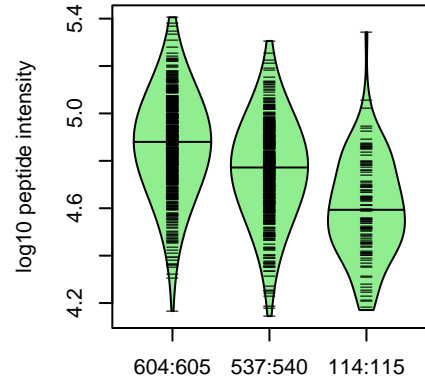

3:126261345:G:A\_A  
 $p = 1e-44$ ,  $\beta = -0.586$ ,  $N = 1255$

**TMEQFTIHLTVNPQSK pc3**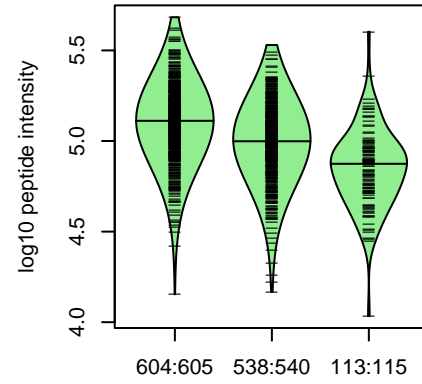

3:126261345:G:A\_A  
 $p = 3e-39$ ,  $\beta = -0.551$ ,  $N = 1255$

**LDAQASFLPK pc2**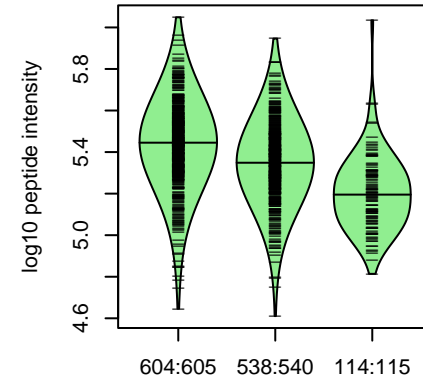

3:126261345:G:A\_A  
 $p = 1.5e-37$ ,  $\beta = -0.538$ ,  $N = 1256$

**VTFQLTYEEVLK pc2**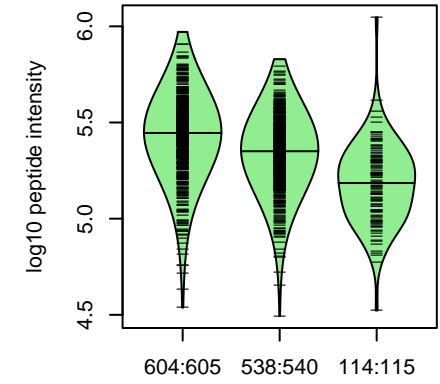

3:126261345:G:A\_A  
 $p = 1.9e-36$ ,  $\beta = -0.53$ ,  $N = 1256$

**P19827 NP2**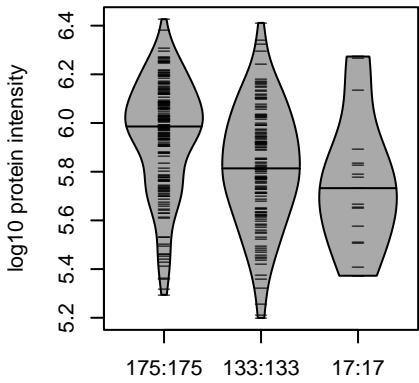

rs1056522  
 $p = 2e-06$ ,  $\beta = -0.438$ ,  $N = 325$

**QAVDTAVDGVFIR pc2**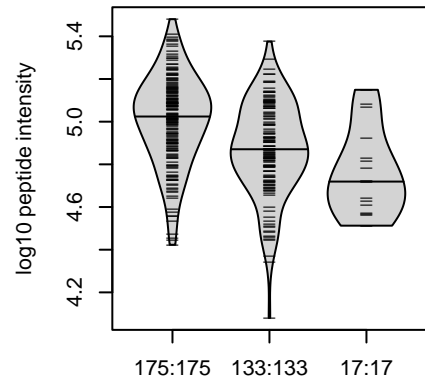

rs1056522  
 $p = 4.8e-10$ ,  $\beta = -0.557$ ,  $N = 325$

**QYYEGSEIVVAGR pc2**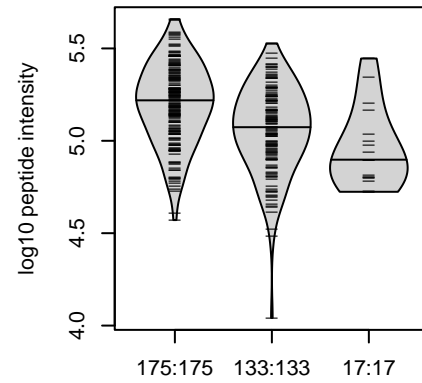

rs1056522  
 $p = 8.9e-10$ ,  $\beta = -0.548$ ,  $N = 325$

**VTYDVSRDK pc2**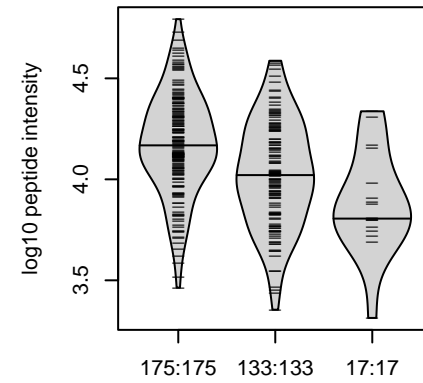

rs1056522  
 $p = 1.9e-09$ ,  $\beta = -0.538$ ,  $N = 325$

**GHMLENHVER pc3**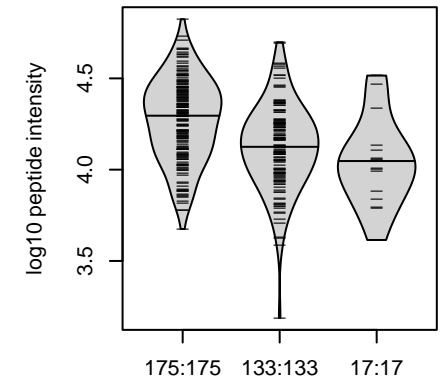

rs1056522  
 $p = 3.5e-09$ ,  $\beta = -0.53$ ,  $N = 325$

**ANLSSQALR pc2  
rs1042779 ALT**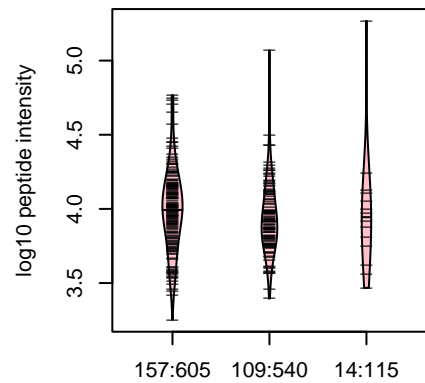

3:126261345:G:A\_A  
 $p = 0.0023$ ,  $\text{model} = \text{REC}$ ,  $N = 280$

**MSLDYGFVTLTSMISIR pc3  
rs1042779 ALT**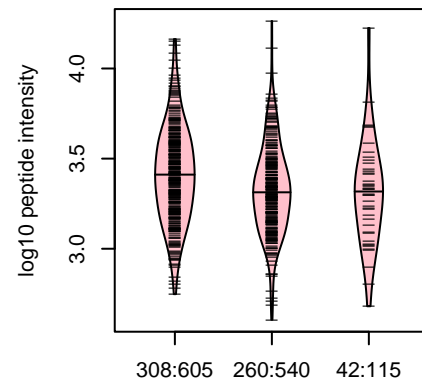

3:126261345:G:A\_A  
 $p = 0.0081$ ,  $\text{model} = \text{DOM}$ ,  $N = 610$

Locus: 13 (Sort: 15)  
 Status: Replicated  
 80% power: Yes  
 SNP: 3:126261345:G:A  
 rsID: rs1056522  
 UniProtID: P19827  
 HGNC gene: ITIH1  
 Type: Trans-pQTL

**ITIH3 [trans]**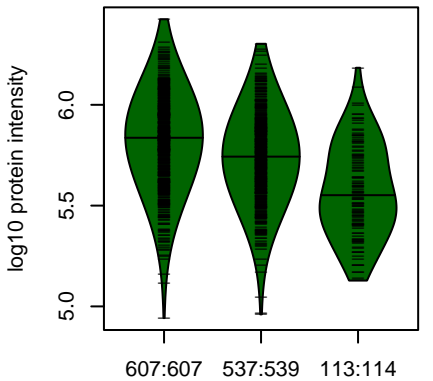

3:126261202:G:A\_A  
 $p = 3e-28$ ,  $\beta = -0.467$ ,  $N = 1257$

**FTVSVNVAAGSK pc2**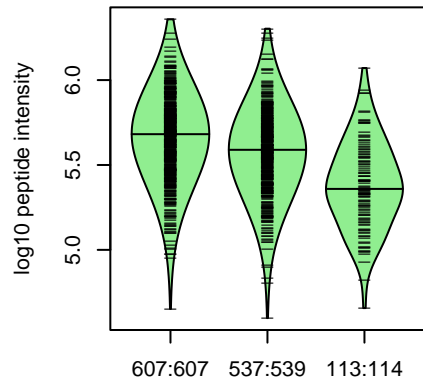

3:126261202:G:A\_A  
 $p = 1.8e-29$ ,  $\beta = -0.478$ ,  $N = 1257$

**FAHNVVTMR pc2**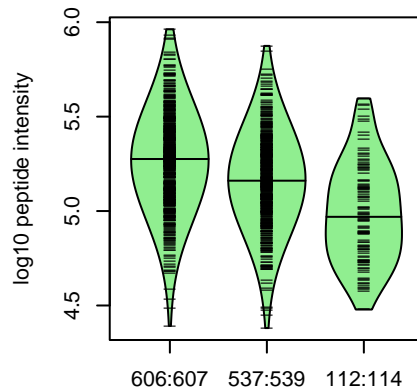

3:126261202:G:A\_A  
 $p = 1.9e-29$ ,  $\beta = -0.478$ ,  $N = 1255$

**VTFELTYEELLK pc2**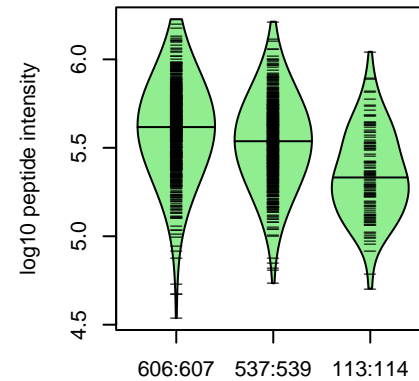

3:126261202:G:A\_A  
 $p = 6.8e-25$ ,  $\beta = -0.438$ ,  $N = 1256$

**YHFVTPLTSMVVTKPEDNER pc2**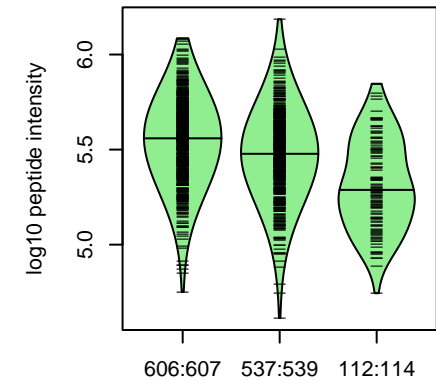

3:126261202:G:A\_A  
 $p = 1.3e-24$ ,  $\beta = -0.436$ ,  $N = 1255$

**Q06033 NP2**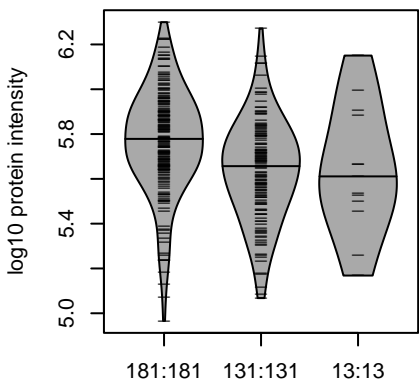

rs1056524  
 $p = 1.7e-06$ ,  $\beta = -0.456$ ,  $N = 325$

**SLPEGVANGIEVYSTK pc2**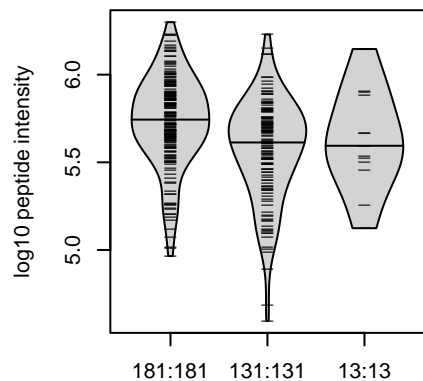

rs1056524  
 $p = 2.3e-06$ ,  $\beta = -0.443$ ,  $N = 325$

**FAHNVVTMR pc2**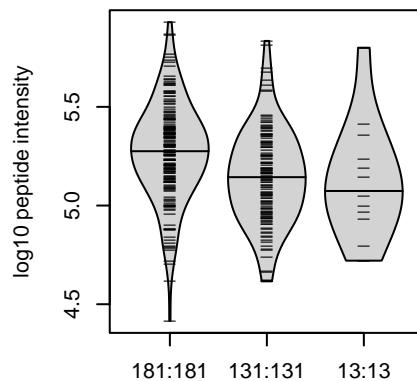

rs1056524  
 $p = 2.7e-06$ ,  $\beta = -0.44$ ,  $N = 325$

**STSIIMLTDGDANVGESRPEK pc3**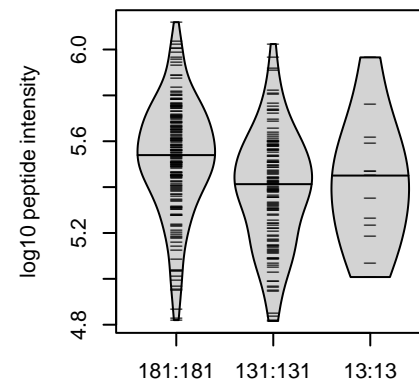

rs1056524  
 $p = 5.8e-06$ ,  $\beta = -0.426$ ,  $N = 325$

**VTFELTYEELLK pc2**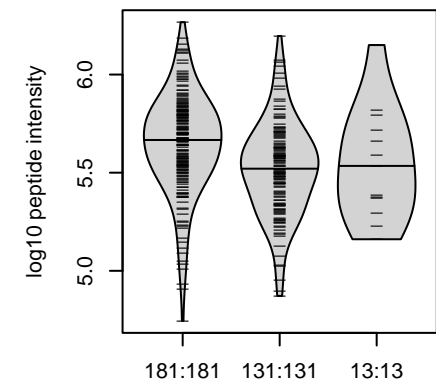

rs1056524  
 $p = 7.1e-06$ ,  $\beta = -0.422$ ,  $N = 325$

**EEDYLNFIILFSGDVSTWK pc3  
rs3617 ALT**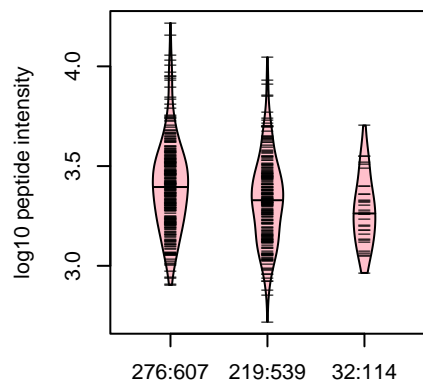

3:126261202:G:A\_A  
 $p = 0.0019$ ,  $\text{model} = \text{DOM}$ ,  $N = 527$

Locus: 13 (Sort: 16)  
 Status: Replicated  
 80% power: Yes  
 SNP: 3:126261202:G:A  
 rsID: rs1056524  
 UniProtID: Q06033  
 HGNC gene: ITIH3  
 Type: Trans-pQTL



**ITIH2 [trans]**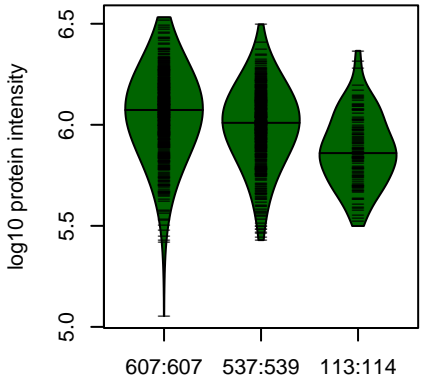

3:126261202:G:A\_A  
 $p = 2.9e-22$ ,  $\beta = -0.414$ ,  $N = 1257$

**MATMIQSK pc2**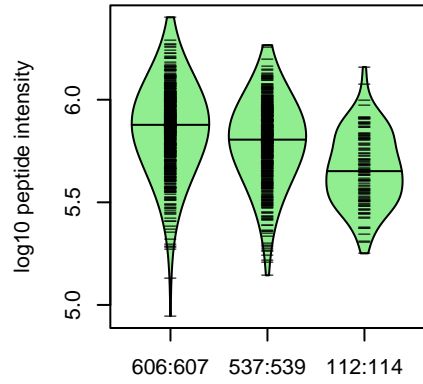

3:126261202:G:A\_A  
 $p = 2.6e-26$ ,  $\beta = -0.452$ ,  $N = 1255$

**LSNENHGIAQR pc2**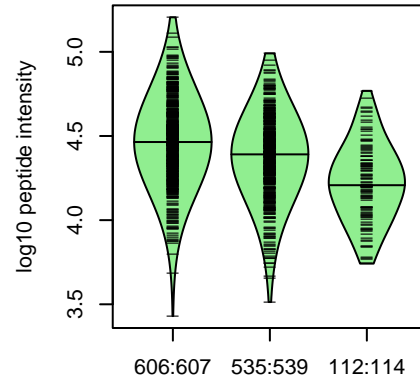

3:126261202:G:A\_A  
 $p = 9.6e-25$ ,  $\beta = -0.438$ ,  $N = 1253$

**IYGNQDTSSQLK pc2**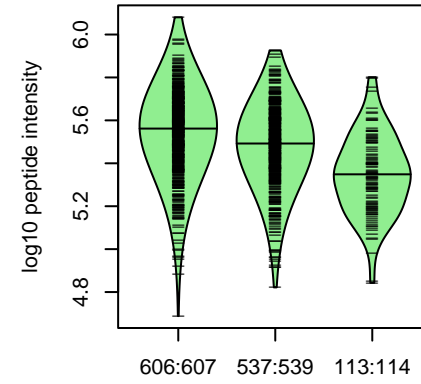

3:126261202:G:A\_A  
 $p = 1.3e-24$ ,  $\beta = -0.436$ ,  $N = 1256$

**VQFELHYQEVK pc2**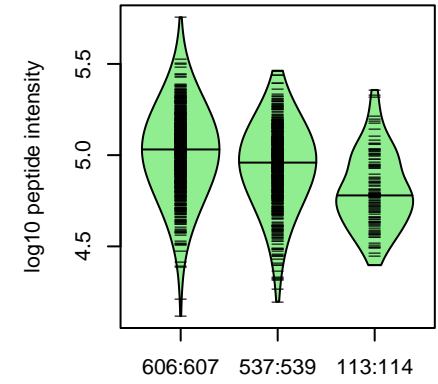

3:126261202:G:A\_A  
 $p = 3.6e-23$ ,  $\beta = -0.422$ ,  $N = 1256$

**P19823 NP2**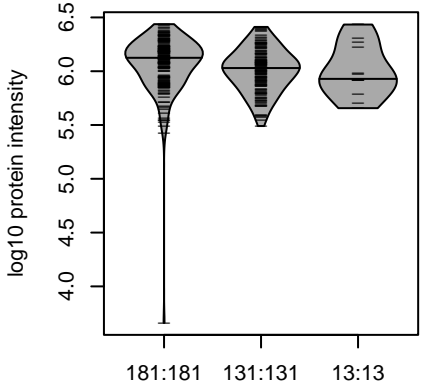

rs1056524  
 $p = 0.0066$ ,  $\beta = -0.262$ ,  $N = 325$

**HADPDFTR pc2**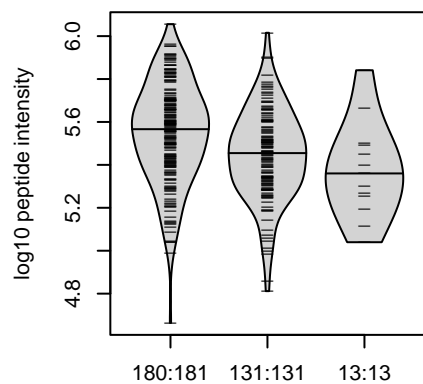

rs1056524  
 $p = 1.8e-05$ ,  $\beta = -0.404$ ,  $N = 324$

**LSNENHGIAQR pc2**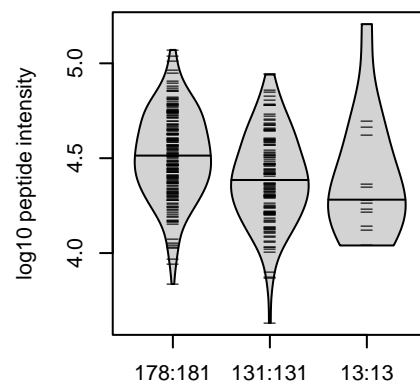

rs1056524  
 $p = 0.00014$ ,  $\beta = -0.361$ ,  $N = 322$

**IYGNQDTSSQLK pc2**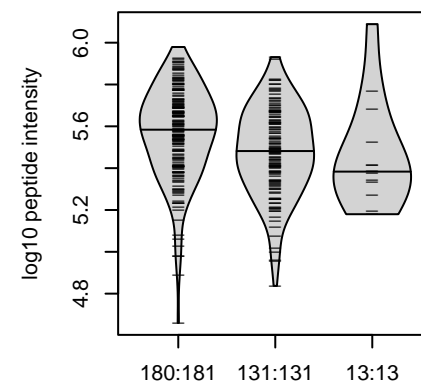

rs1056524  
 $p = 0.00025$ ,  $\beta = -0.346$ ,  $N = 324$

**TILDDLRAEDHFSVIDFNQIR pc4**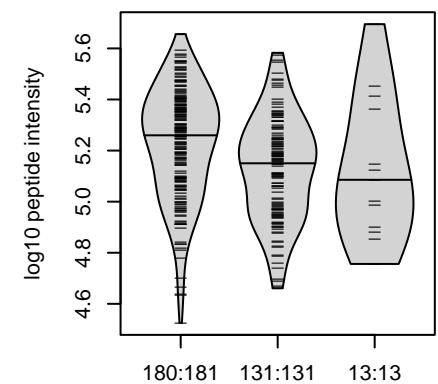

rs1056524  
 $p = 0.00029$ ,  $\beta = -0.343$ ,  $N = 324$

Locus: 13 (Sort: 17)  
 Status: Not replicated  
 80% power: Yes  
 SNP: 3:126261202:G:A  
 rsID: rs1056524  
 UniProtID: P19823  
 HGNC gene: ITIH2  
 Type: Trans-pQTL

### HLA-G [cis]

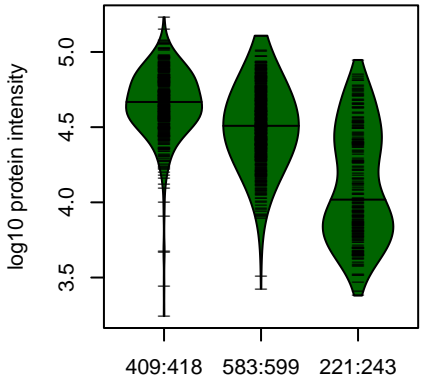

6:29916391:A:C\_C  
p = 3.2e-66, beta = -0.658, N = 1213

### DYLALNEDLR pc2

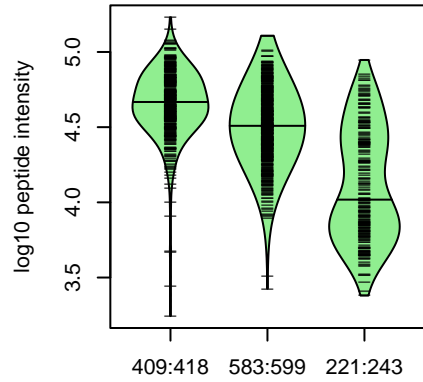

6:29916391:A:C\_C  
p = 3.2e-66, beta = -0.658, N = 1213

### Q5RJ85 NP1

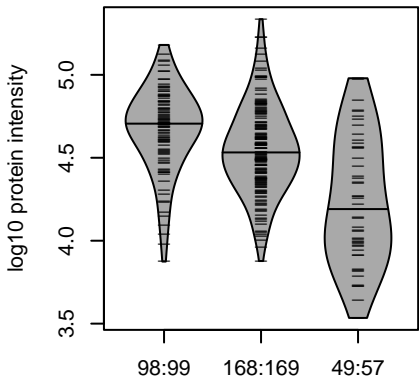

rs2517718  
p = 1e-12, beta = -0.578, N = 315

### DYLALNEDLR pc2

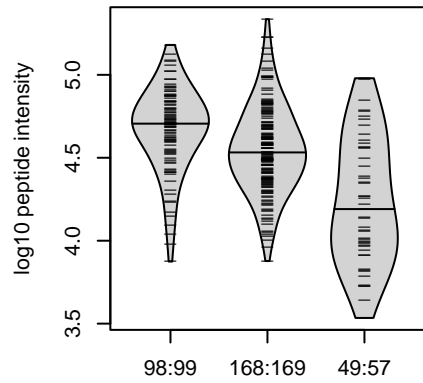

rs2517718  
p = 6.4e-13, beta = -0.578, N = 315

Locus: 14 (Sort: 18)  
Status: Replicated  
80% power: Yes  
SNP: 6:29916391:A:C  
rsID: rs2517718  
UniProtID: Q5RJ85  
HGNC gene: HLA-G  
Type: Cis-pQTL

### WAAVVPSGEEQR pc2 rs707908;rs1736924 ALT

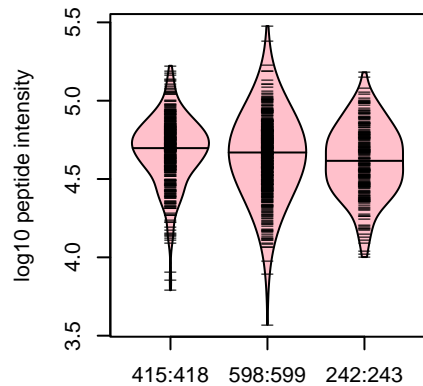

6:29916391:A:C\_C  
p = 0.34, model = REC, N = 1255

**FUCA1 [trans]**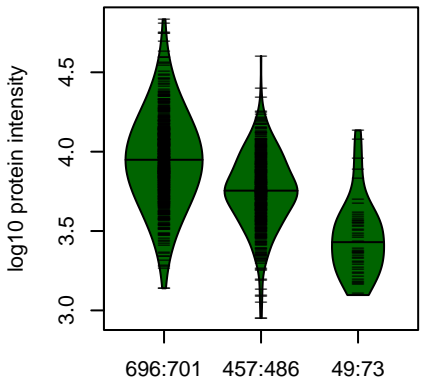

6:143825104:G:T\_T  
 $p = 1.3e-55$ ,  $\beta = -0.747$ ,  $N = 1202$

**ITMLGIQGDLK pc2**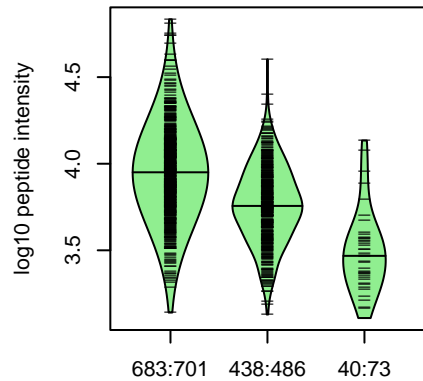

6:143825104:G:T\_T  
 $p = 2.5e-47$ ,  $\beta = -0.719$ ,  $N = 1161$

**DLVGELGTALR pc2**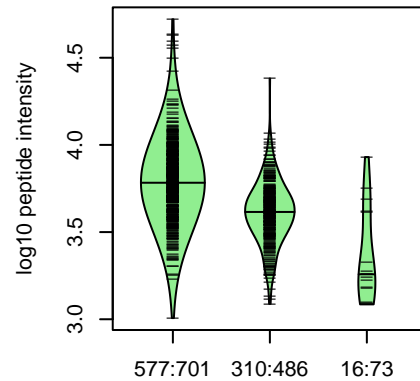

6:143825104:G:T\_T  
 $p = 1.9e-39$ ,  $\beta = -0.798$ ,  $N = 903$

**WEMCTSIDK pc2**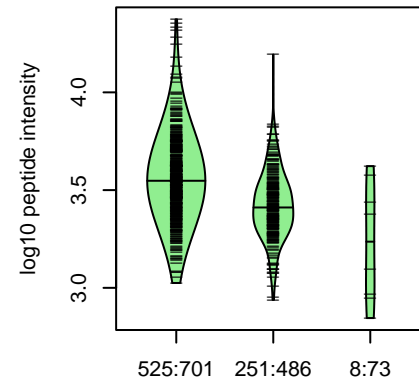

6:143825104:G:T\_T  
 $p = 5.5e-19$ ,  $\beta = -0.623$ ,  $N = 784$

**DGLIVPIFQER pc2**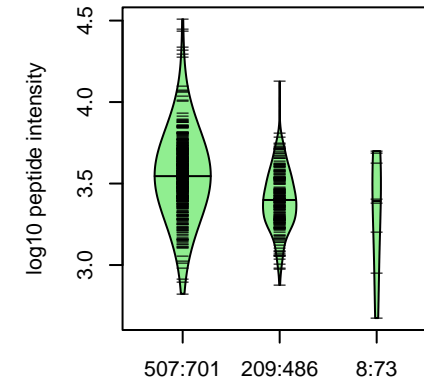

6:143825104:G:T\_T  
 $p = 1.4e-15$ ,  $\beta = -0.594$ ,  $N = 724$

**P04066 NP5**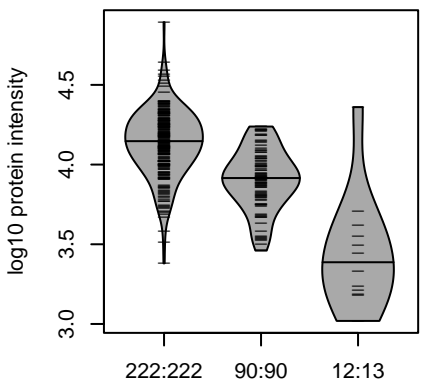

rs11155297  
 $p = 3.9e-21$ ,  $\beta = -0.878$ ,  $N = 324$

**DLVGELGTALR pc2**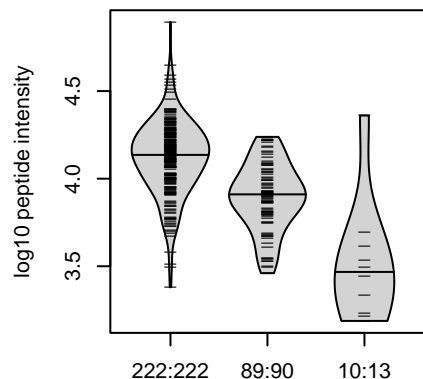

rs11155297  
 $p = 6.5e-18$ ,  $\beta = -0.839$ ,  $N = 321$

**ITMLGIQGDLK pc2**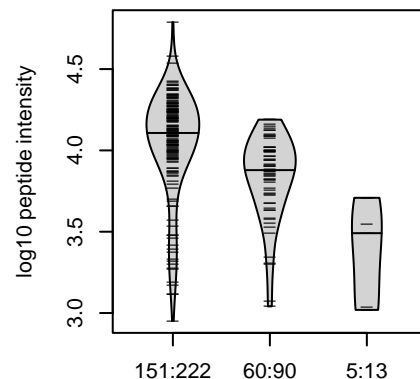

rs11155297  
 $p = 2.1e-08$ ,  $\beta = -0.703$ ,  $N = 216$

**YVVLTTK pc2**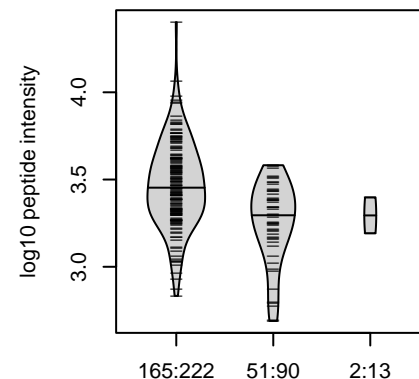

rs11155297  
 $p = 1.4e-07$ ,  $\beta = -0.747$ ,  $N = 218$

**WEMCTSIDK pc2**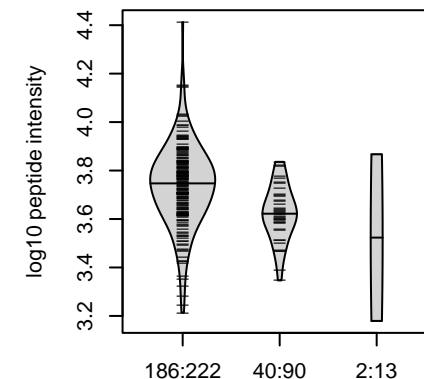

rs11155297  
 $p = 3.3e-05$ ,  $\beta = -0.638$ ,  $N = 228$

Locus: 15 (Sort: 19)  
 Status: Replicated  
 80% power: Yes  
 SNP: 6:143825104:G:T  
 rsID: rs11155297  
 UniProtID: P04066  
 HGNC gene: FUCA1  
 Type: Trans-pQTL

**FUCA2 [cis]**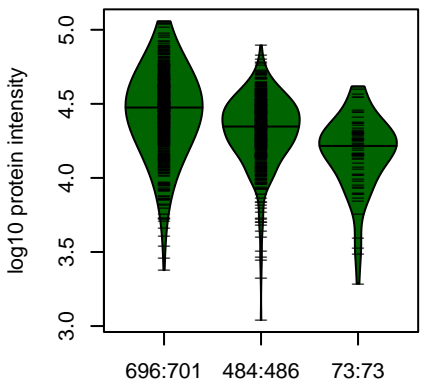

6:143825104:G:T\_T  
 $p = 7.3e-31$ ,  $\beta = -0.523$ ,  $N = 1253$

**YEDFGPLFTAK pc2**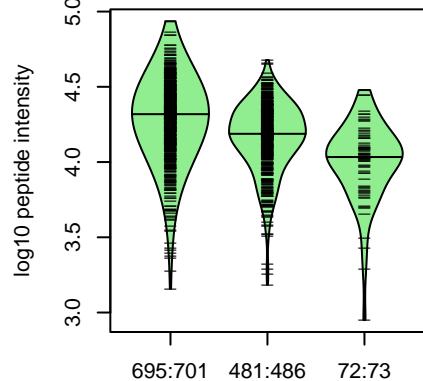

6:143825104:G:T\_T  
 $p = 5.9e-30$ ,  $\beta = -0.517$ ,  $N = 1248$

**WENCMTIDK pc2**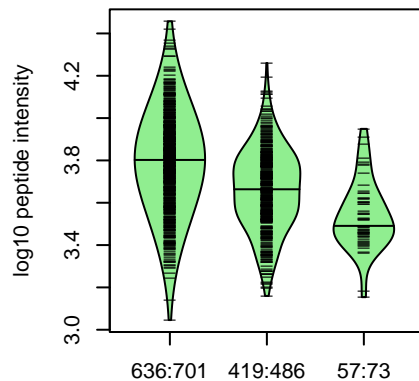

6:143825104:G:T\_T  
 $p = 1.6e-29$ ,  $\beta = -0.552$ ,  $N = 1112$

**EAGISDYLTIEELVK pc2**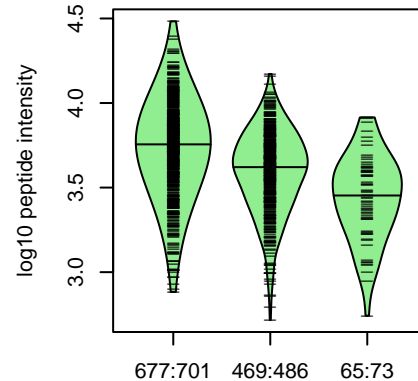

6:143825104:G:T\_T  
 $p = 4.4e-29$ ,  $\beta = -0.522$ ,  $N = 1211$

**FDPTWESLDAR pc2**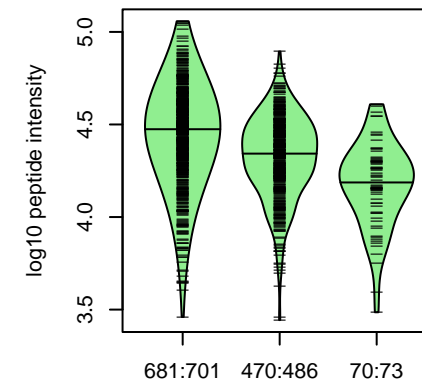

6:143825104:G:T\_T  
 $p = 1.2e-28$ ,  $\beta = -0.511$ ,  $N = 1221$

**Q9BTY2 NP2**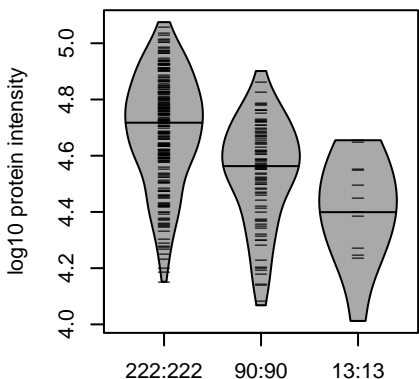

rs11155297  
 $p = 6.9e-12$ ,  $\beta = -0.651$ ,  $N = 325$

**QLPAWFDQAK pc2**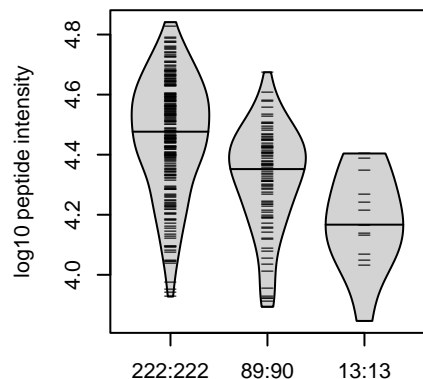

rs11155297  
 $p = 9.2e-13$ ,  $\beta = -0.678$ ,  $N = 324$

**FDPTWESLDAR pc2**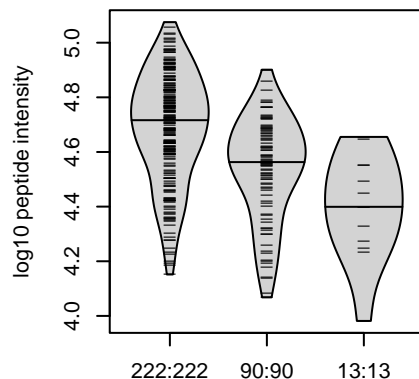

rs11155297  
 $p = 9.9e-12$ ,  $\beta = -0.648$ ,  $N = 325$

**WPTSGQLFLGHPK pc3**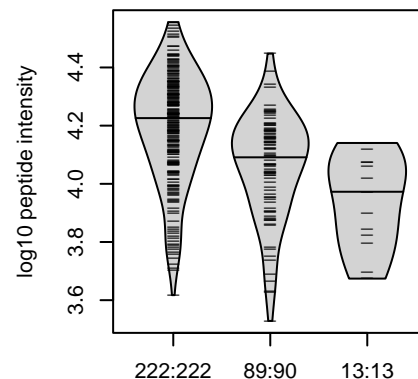

rs11155297  
 $p = 2.6e-11$ ,  $\beta = -0.637$ ,  $N = 324$

**EAGISDYLTIEELVK pc2**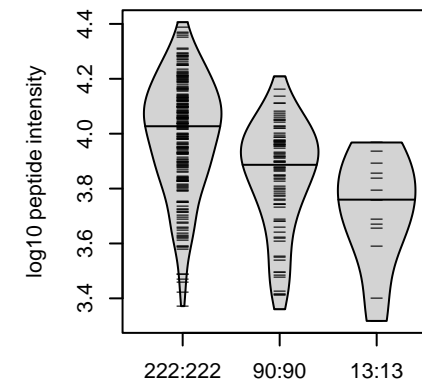

rs11155297  
 $p = 2.9e-11$ ,  $\beta = -0.634$ ,  $N = 325$

Locus: 15 (Sort: 20)  
 Status: Replicated  
 80% power: Yes  
 SNP: 6:143825104:G:T  
 rsID: rs11155297  
 UniProtID: Q9BTY2  
 HGNC gene: FUCA2  
 Type: Cis-pQTL

**VNGEAIYETYWR pc2  
rs3762001 ALT**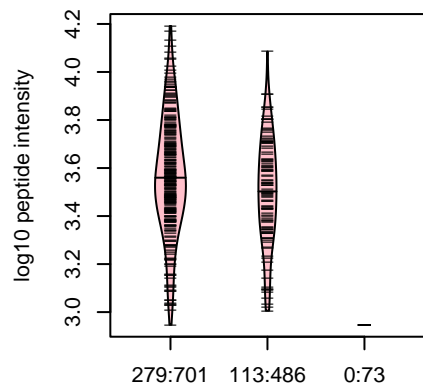

6:143825104:G:T\_T  
 $p = 5.6e-14$ ,  $\text{model} = \text{REC}$ ,  $N = 392$

**VNGEAIYETHWR pc2  
rs3762001 REF**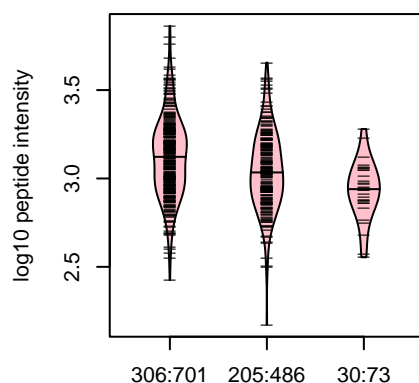

6:143825104:G:T\_T  
 $p = 0.57$ ,  $\text{model} = \text{REC}$ ,  $N = 541$

**CTSH [cis]**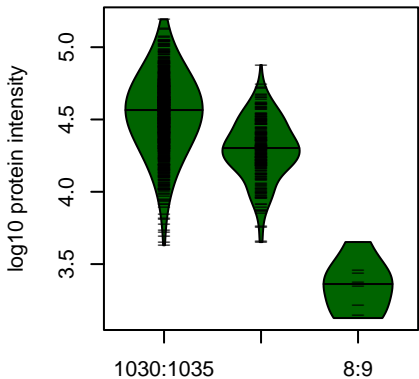

15:79237293:C:T\_T  
 $p = 3e-51$ ,  $\beta = -1$ ,  $N = 1253$

**MALNQFSDMSFAEIK pc2**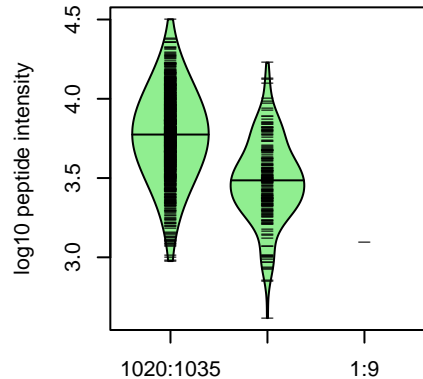

15:79237293:C:T\_T  
 $p = 6.4e-40$ ,  $\beta = -0.964$ ,  $N = 1226$

**TGIYSTSCHK pc2**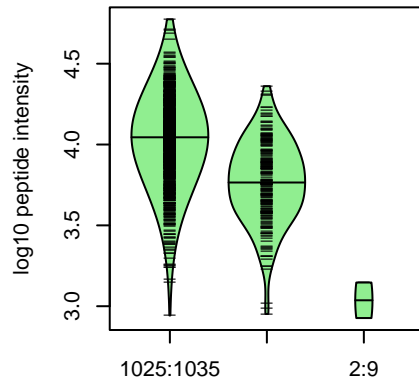

15:79237293:C:T\_T  
 $p = 3.7e-39$ ,  $\beta = -0.931$ ,  $N = 1240$

**VQGACGSCWTFSTTGALESAIATGK**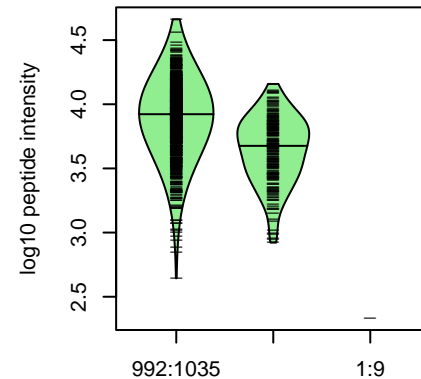

15:79237293:C:T\_T  
 $p = 2.5e-32$ ,  $\beta = -0.879$ ,  $N = 1193$

**VNHAVLAVGYGEK pc2**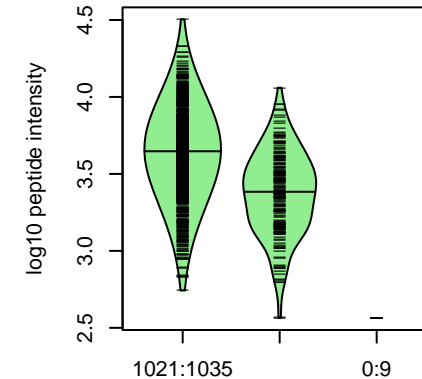

15:79237293:C:T\_T  
 $p = 8.6e-30$ ,  $\beta = -0.845$ ,  $N = 1224$

**A0A087X0D5 NP3**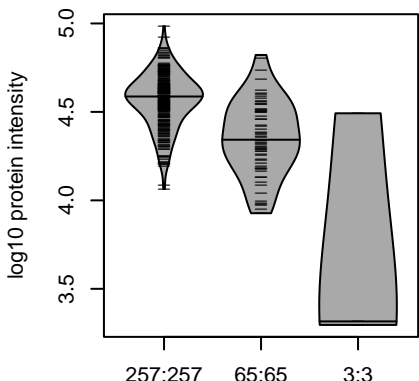

rs2289702  
 $p = 2.9e-17$ ,  $\beta = -0.996$ ,  $N = 325$

**VNHAVLAVGYGEK pc3**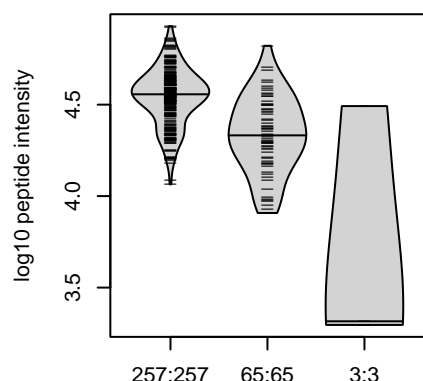

rs2289702  
 $p = 6.8e-17$ ,  $\beta = -0.998$ ,  $N = 325$

**VQGACGSCWTFSTTGALESAIATGK**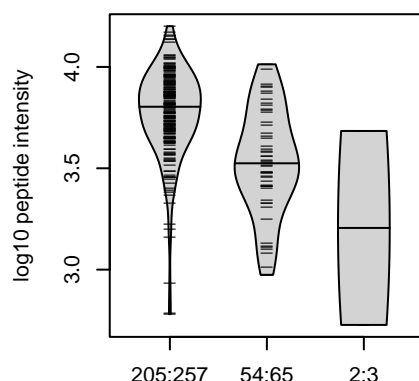

rs2289702  
 $p = 2.6e-12$ ,  $\beta = -0.94$ ,  $N = 261$

**TGIYSTSCHK pc2**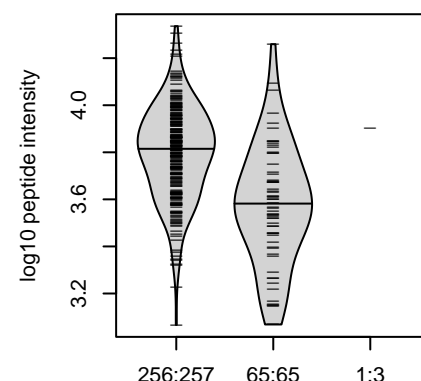

rs2289702  
 $p = 4.9e-11$ ,  $\beta = -0.847$ ,  $N = 322$

**NGIPYWIVK pc2**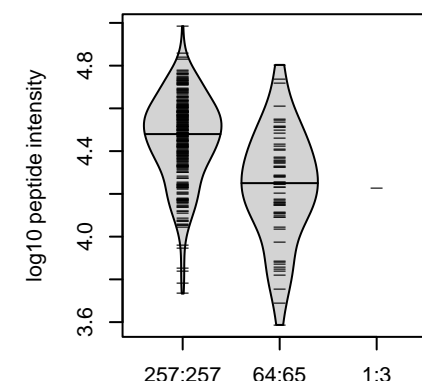

rs2289702  
 $p = 1.7e-10$ ,  $\beta = -0.829$ ,  $N = 322$

Locus: 16 (Sort: 21)  
 Status: Replicated  
 80% power: Yes  
 SNP: 15:79237293:C:T  
 rsID: rs2289702  
 UniProtID: A0A087X0D5  
 HGNC gene: CTSH  
 Type: Cis-pQTL

### HLA-G [cis]

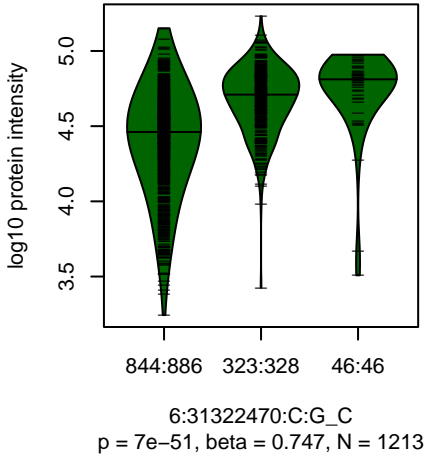

### DYLALNEDLR pc2

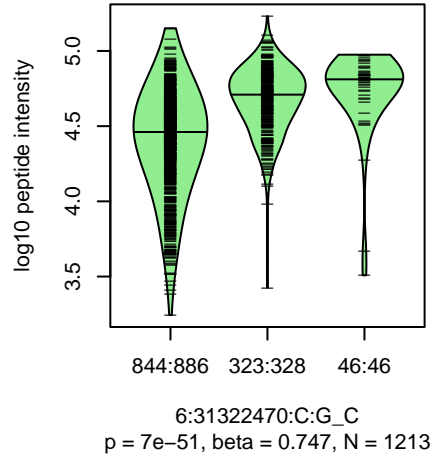

### Q5RJ85 NP1

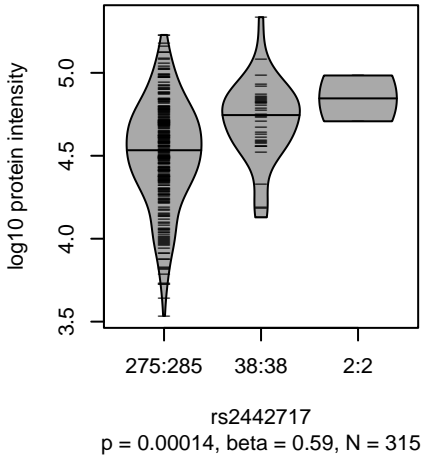

### DYLALNEDLR pc2

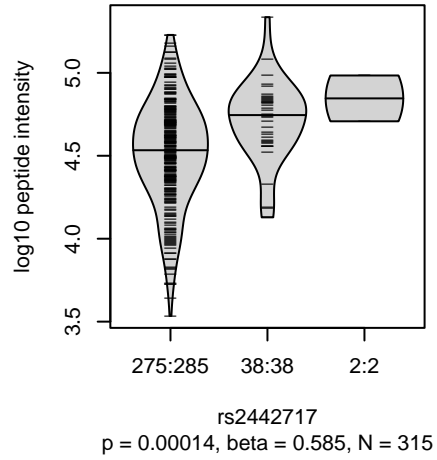

Locus: 17 (Sort: 22)  
Status: Replicated  
80% power: Yes  
SNP: 6:31322470:C:G  
rsID: rs2442717  
UniProtID: Q5RJ85  
HGNC gene: HLA-G  
Type: Cis-pQTL

### WAAVVPSGEEQR pc2 rs707908;rs1736924 ALT

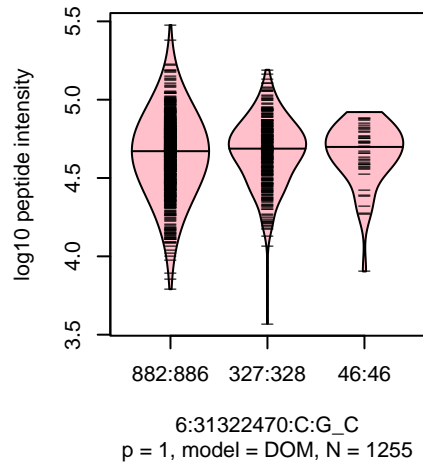

**HLA-B [cis]**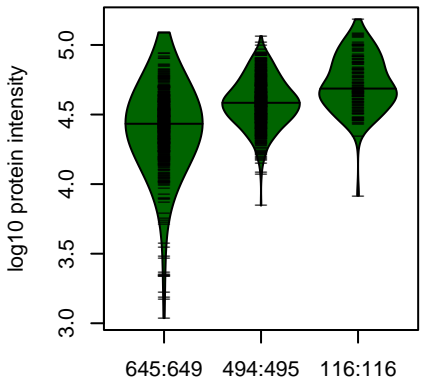

6:31242089:A:T\_A  
 $p = 1.5e-49$ ,  $\beta = 0.609$ ,  $N = 1255$

**SWTAADTAAQITQR pc2**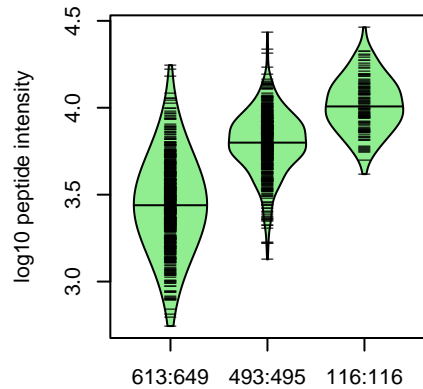

6:31242089:A:T\_A  
 $p = 2.3e-110$ ,  $\beta = 0.877$ ,  $N = 1222$

**FDSAASPR pc2**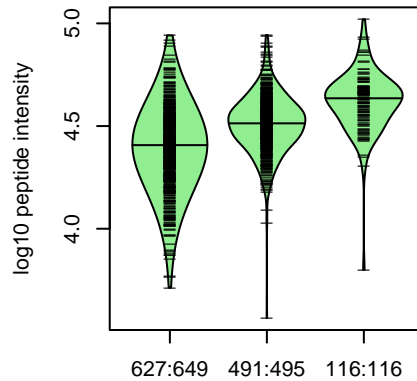

6:31242089:A:T\_A  
 $p = 3.1e-43$ ,  $\beta = 0.573$ ,  $N = 1234$

**DYIALNEDLR pc2**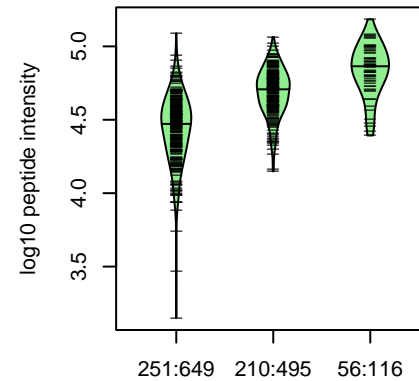

6:31242089:A:T\_A  
 $p = 2.8e-33$ ,  $\beta = 0.729$ ,  $N = 517$

**AQAQTDRESLR pc3**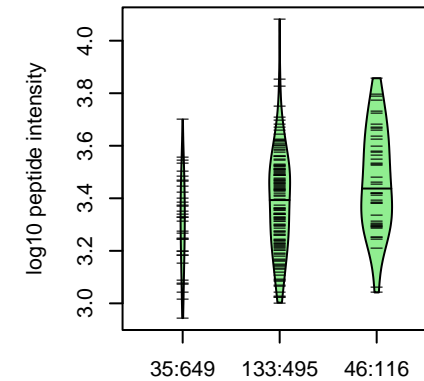

6:31242089:A:T\_A  
 $p = 8.9e-05$ ,  $\beta = 0.422$ ,  $N = 214$

**P01889 NP2**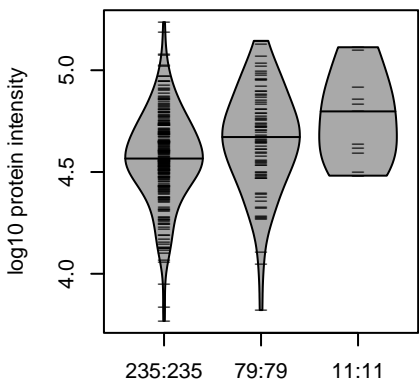

rs2524080  
 $p = 4e-04$ ,  $\beta = 0.361$ ,  $N = 325$

**SWTAADTAAQITQR pc2**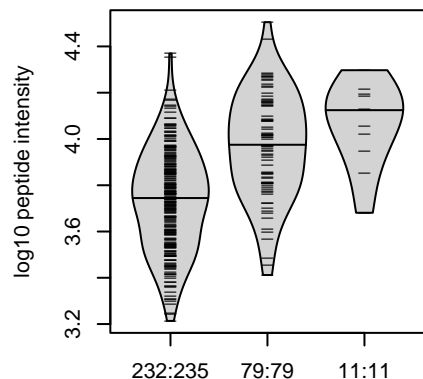

rs2524080  
 $p = 2e-16$ ,  $\beta = 0.807$ ,  $N = 322$

**DYIALNEDLR pc2**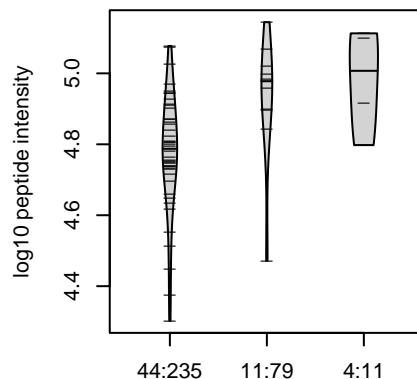

rs2524080  
 $p = 0.00041$ ,  $\beta = 0.704$ ,  $N = 59$

**APWIEQEGPEYWDR pc2**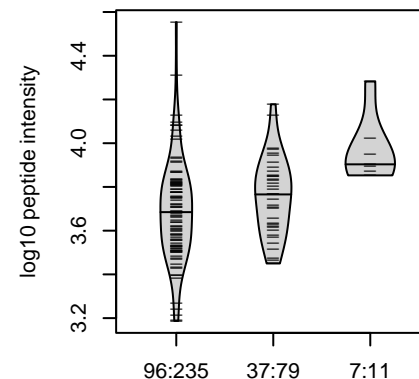

rs2524080  
 $p = 0.002$ ,  $\beta = 0.437$ ,  $N = 140$

**FDSAASPR pc2**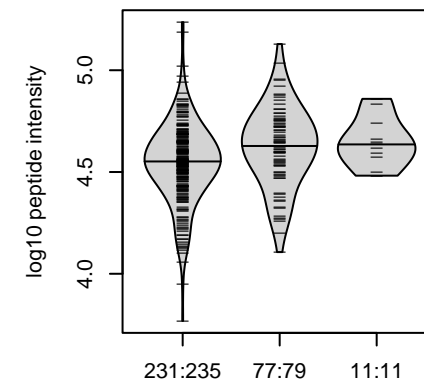

rs2524080  
 $p = 0.0028$ ,  $\beta = 0.309$ ,  $N = 319$

Locus: 18 (Sort: 23)  
 Status: Not replicated  
 80% power: Yes  
 SNP: 6:31242089:A:T  
 rsID: rs2524080  
 UniProtID: P01889  
 HGNC gene: HLA-B  
 Type: Cis-pQTL

**FISVGYVDDTQFVR pc2  
rs1050437 REF**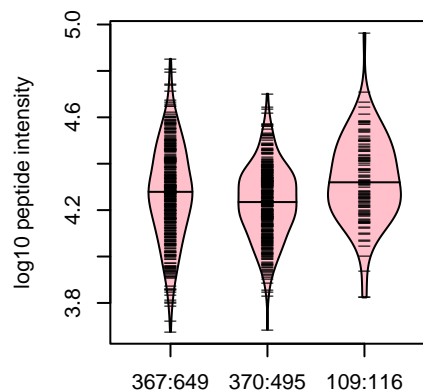

6:31242089:A:T\_A  
 $p = 1.3e-16$ , model = REC,  $N = 846$

**GEPRFISVGYVDDTQFVR pc3  
rs1050437 REF**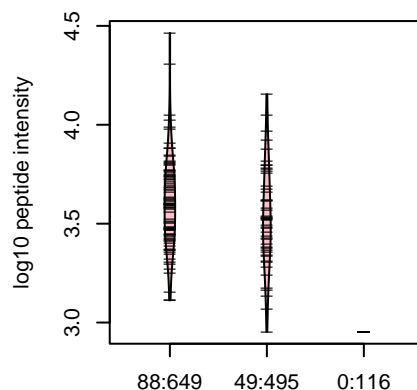

6:31242089:A:T\_A  
 $p = 1.1e-06$ , model = DOM,  $N = 137$

**WAAVVVPSGEEQR pc2  
rs707908;rs1736924 ALT**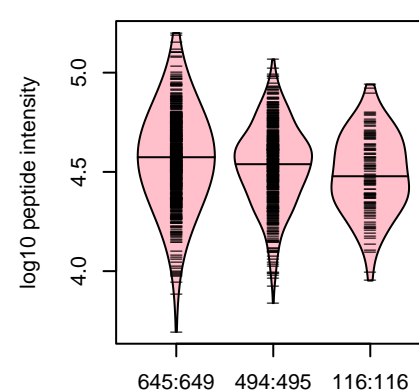

6:31242089:A:T\_A  
 $p = 0.38$ , model = REC,  $N = 1255$

**PEBP4 [cis]**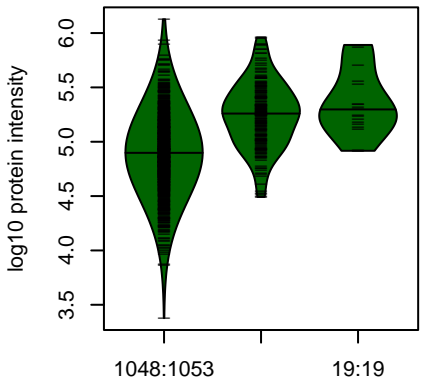

8:22570901:C:T\_T  
 $p = 2.4e-47$ ,  $\beta = 0.925$ ,  $N = 1255$

**VVPDCNNYR pc2**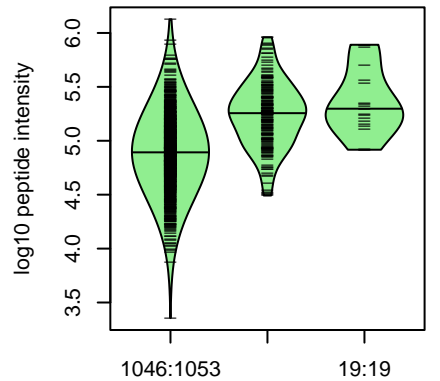

8:22570901:C:T\_T  
 $p = 1.3e-47$ ,  $\beta = 0.927$ ,  $N = 1253$

**ITSWMEPIVK pc2**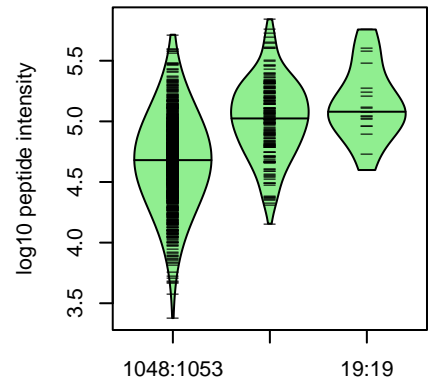

8:22570901:C:T\_T  
 $p = 2.5e-44$ ,  $\beta = 0.896$ ,  $N = 1255$

**YQFFVYLQEGK pc2**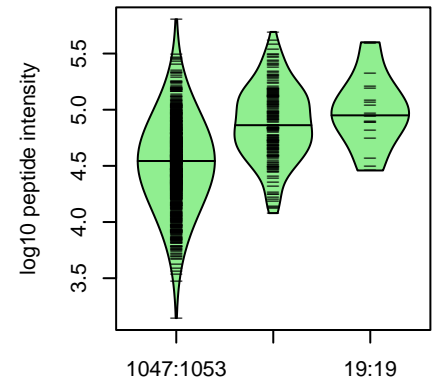

8:22570901:C:T\_T  
 $p = 8.5e-42$ ,  $\beta = 0.871$ ,  $N = 1254$

**IQGQELSAYQAPSPPAHSGFHR pc2**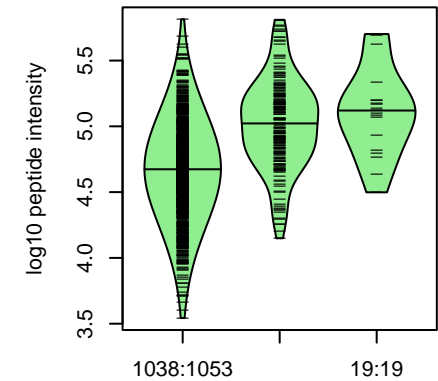

8:22570901:C:T\_T  
 $p = 5.3e-41$ ,  $\beta = 0.864$ ,  $N = 1244$

**Q96S96 NP3**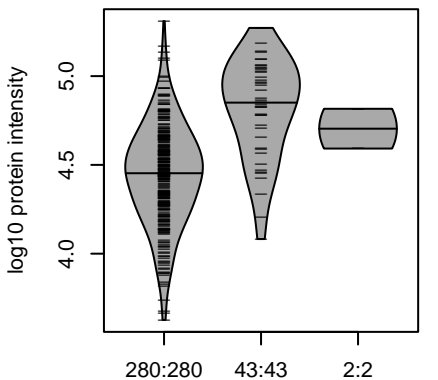

rs3087803  
 $p = 3.9e-12$ ,  $\beta = 0.987$ ,  $N = 325$

**VVPDCNNYR pc2**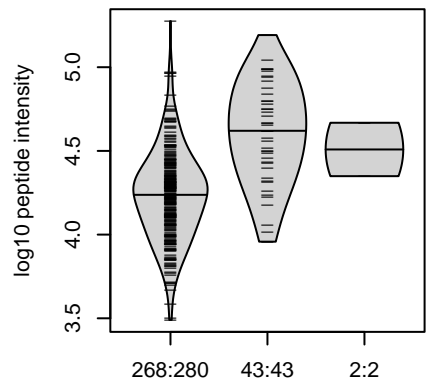

rs3087803  
 $p = 1.8e-12$ ,  $\beta = 1.01$ ,  $N = 313$

**ITSWMEPIVK pc2**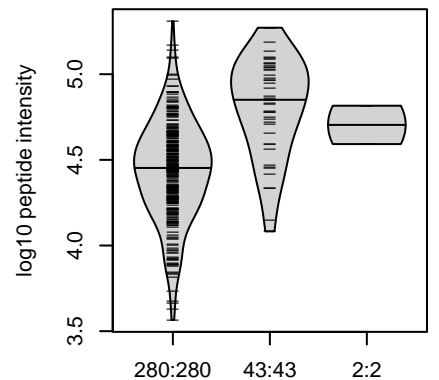

rs3087803  
 $p = 1.1e-11$ ,  $\beta = 0.975$ ,  $N = 325$

**YQFFVYLQEGK pc2**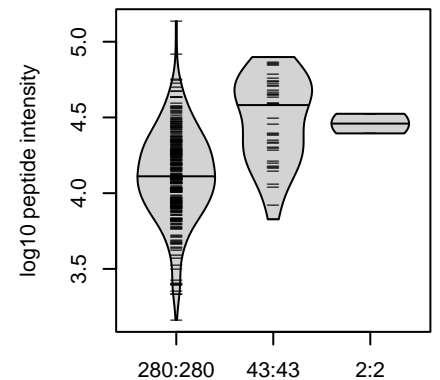

rs3087803  
 $p = 2.2e-11$ ,  $\beta = 0.962$ ,  $N = 325$

**HWLVTDIK pc2**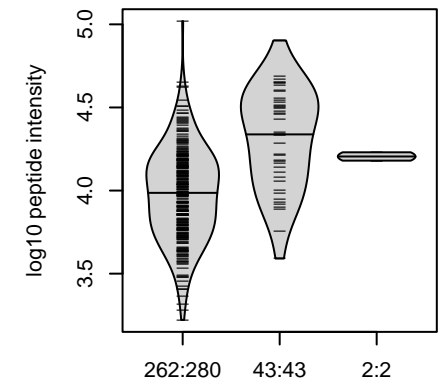

rs3087803  
 $p = 1.1e-09$ ,  $\beta = 0.883$ ,  $N = 307$

Locus: 19 (Sort: 24)

Status: Replicated

80% power: Yes

SNP: 8:22570901:C:T

rsID: rs3087803

UniProtID: Q96S96

HGNC gene: PEBP4

Type: Cis-pQTL



**HLA-B [cis]**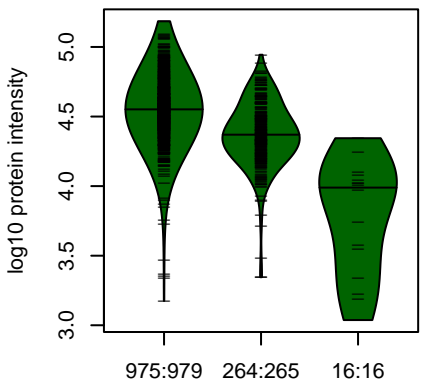

6:31236900:G:A\_A  
 $p = 5.2e-46$ ,  $\beta = -0.848$ ,  $N = 1255$

**FDSAASPR pc2**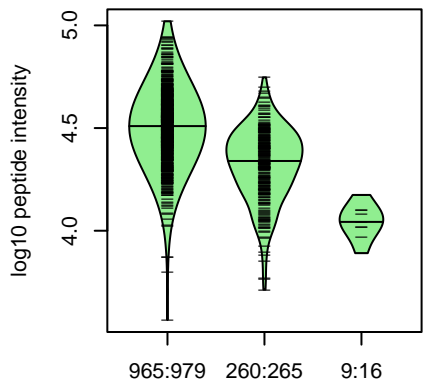

6:31236900:G:A\_A  
 $p = 1.5e-55$ ,  $\beta = -0.975$ ,  $N = 1234$

**SWTAADTAAQITQR pc2**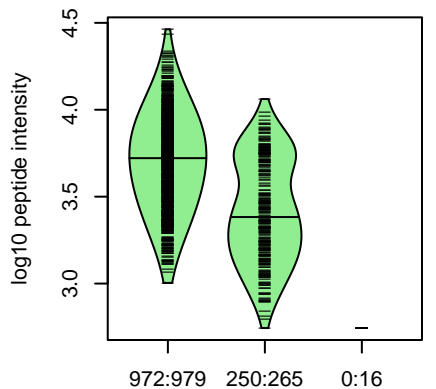

6:31236900:G:A\_A  
 $p = 7e-47$ ,  $\beta = -0.974$ ,  $N = 1222$

**DYIALNEDLR pc2**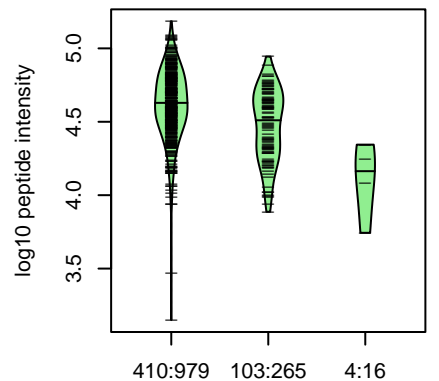

6:31236900:G:A\_A  
 $p = 1.9e-11$ ,  $\beta = -0.668$ ,  $N = 517$

**DGEDTQDTELVETRPAGDR pc3**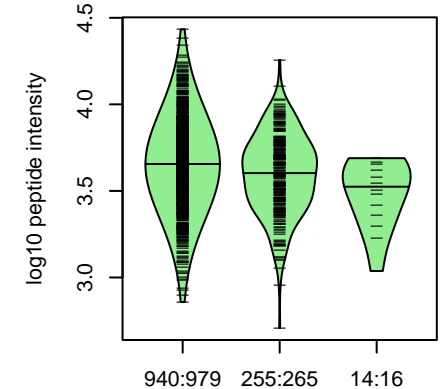

6:31236900:G:A\_A  
 $p = 0.00046$ ,  $\beta = -0.223$ ,  $N = 1209$

**P01889 NP2**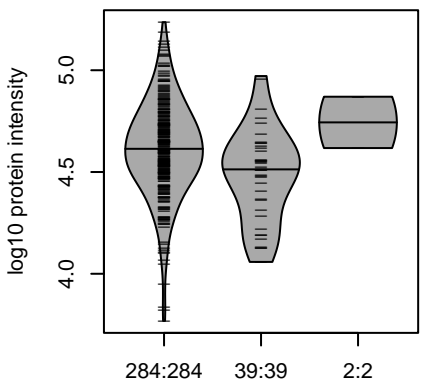

rs1049853  
 $p = 0.014$ ,  $\beta = -0.376$ ,  $N = 325$

**SWTAADTAAQITQR pc2**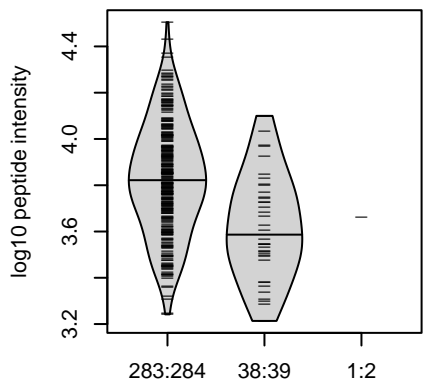

rs1049853  
 $p = 7.9e-06$ ,  $\beta = -0.714$ ,  $N = 322$

**FDSAASPR pc2**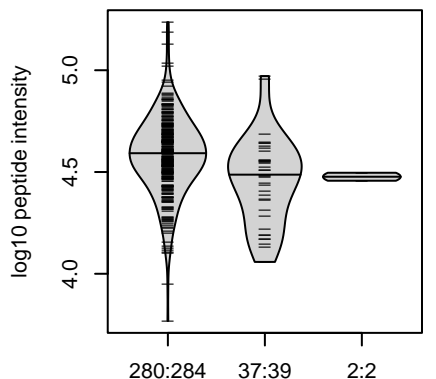

rs1049853  
 $p = 0.00019$ ,  $\beta = -0.579$ ,  $N = 319$

**THVTHHPISDHEATLR pc4**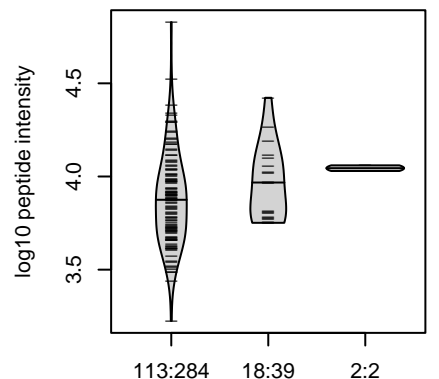

rs1049853  
 $p = 0.14$ ,  $\beta = 0.307$ ,  $N = 133$

**DGEDTQDTELVETRPAGDR pc3**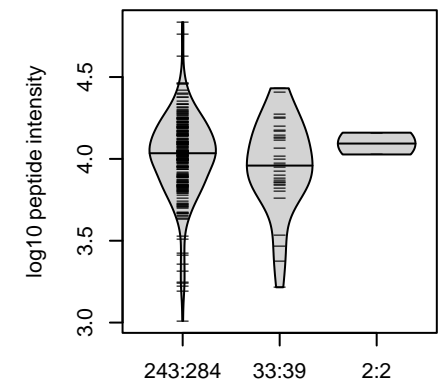

rs1049853  
 $p = 0.17$ ,  $\beta = -0.224$ ,  $N = 278$

Locus: 20 (Sort: 25)  
 Status: Not replicated  
 80% power: Yes  
 SNP: 6:31236900:G:A  
 rsID: rs1049853  
 UniProtID: P01889  
 HGNC gene: HLA-B  
 Type: Cis-pQTL

**GEPRFISGVYDDTQFVR pc3  
rs1050437 REF**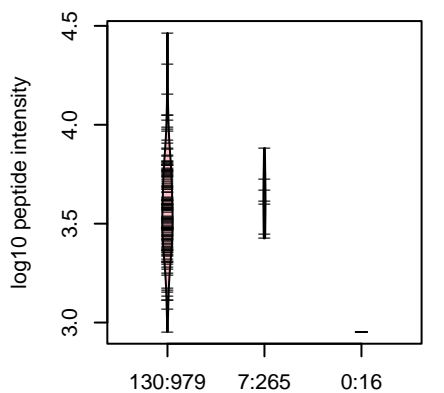

6:31236900:G:A\_A  
 $p = 1.3e-08$ , model = REC,  $N = 137$

**FISGVYDDTQFVR pc2  
rs1050437 REF**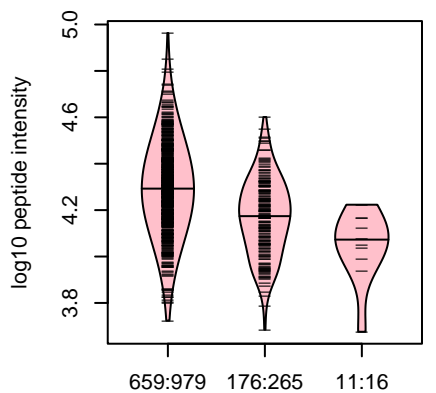

6:31236900:G:A\_A  
 $p = 0.83$ , model = REC,  $N = 846$

**WAAVVVPSGEEQR pc2  
rs707908;rs1736924 ALT**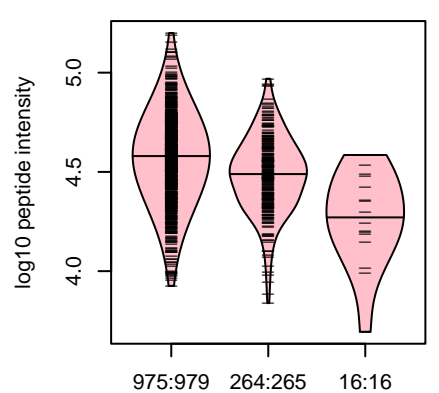

6:31236900:G:A\_A  
 $p = 1$ , model = DOM,  $N = 1255$

**CFB [cis]**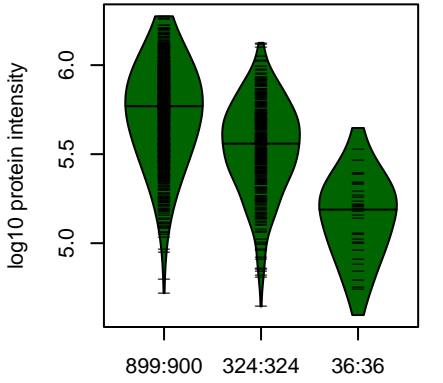

6:31947086:G:A\_A  
 $p = 7.9e-44$ ,  $\beta = -0.718$ ,  $N = 1259$

**LEDSVTYHCSR pc3**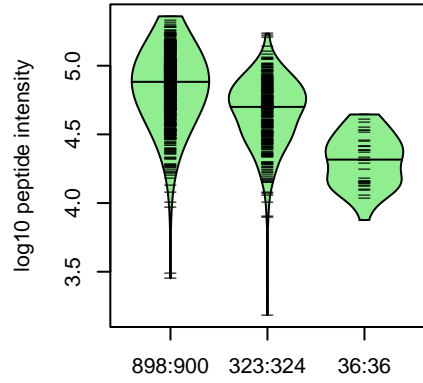

6:31947086:G:A\_A  
 $p = 5.5e-48$ ,  $\beta = -0.751$ ,  $N = 1257$

**STGSWSTLK pc2**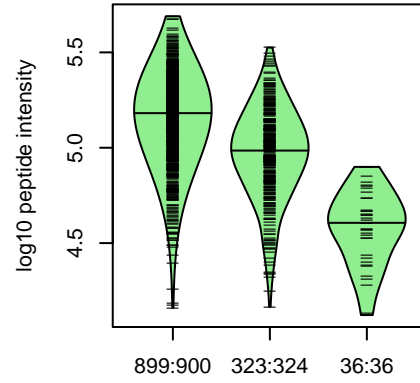

6:31947086:G:A\_A  
 $p = 2.2e-45$ ,  $\beta = -0.731$ ,  $N = 1258$

**LPPTTTCQQQK pc2**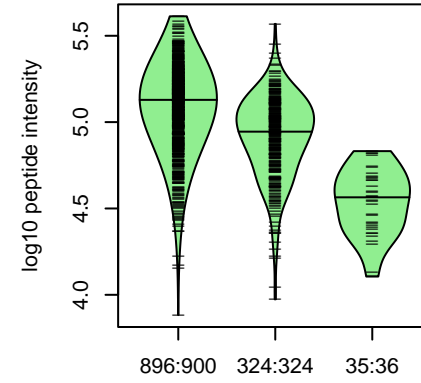

6:31947086:G:A\_A  
 $p = 2.5e-44$ ,  $\beta = -0.726$ ,  $N = 1255$

**QLNEINYEDHK pc3**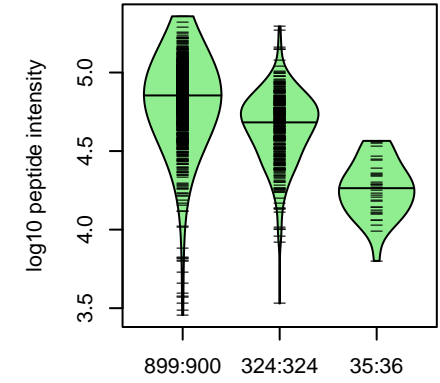

6:31947086:G:A\_A  
 $p = 2.6e-44$ ,  $\beta = -0.725$ ,  $N = 1258$

**B4E1Z4 NP4**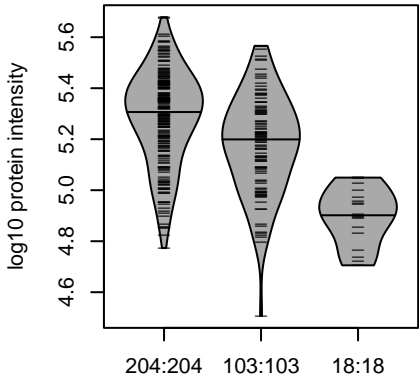

rs391165  
 $p = 3.3e-15$ ,  $\beta = -0.697$ ,  $N = 325$

**VSEADSSNADWVTK pc2**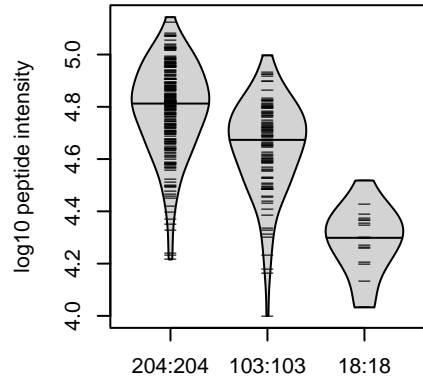

rs391165  
 $p = 1e-24$ ,  $\beta = -0.872$ ,  $N = 325$

**LEDSVTYHCSR pc2**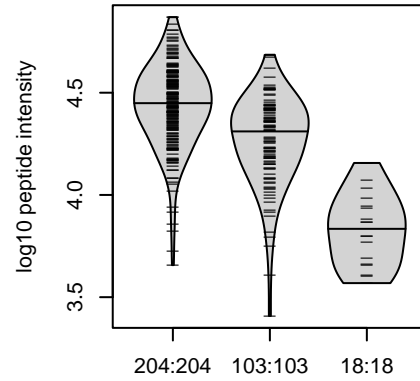

rs391165  
 $p = 1.4e-24$ ,  $\beta = -0.87$ ,  $N = 325$

**QLNEINYEDHK pc2**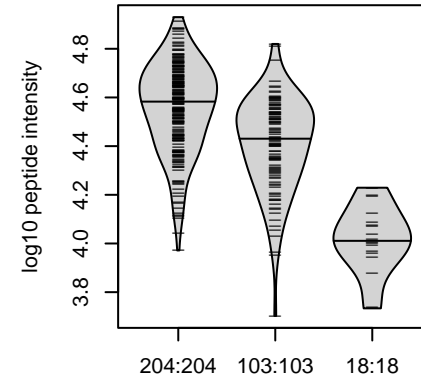

rs391165  
 $p = 2.2e-24$ ,  $\beta = -0.866$ ,  $N = 325$

**LPPTTTCQQQK pc2**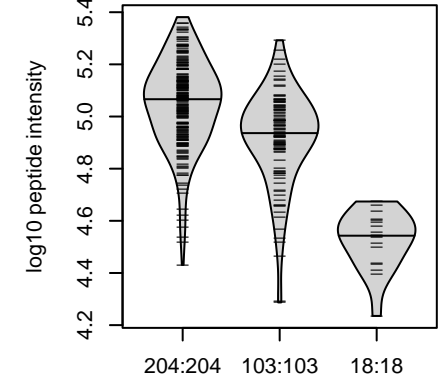

rs391165  
 $p = 2e-23$ ,  $\beta = -0.851$ ,  $N = 325$

Locus: 21 (Sort: 26)  
 Status: Replicated  
 80% power: Yes  
 SNP: 6:31947086:G:A  
 rsID: rs391165  
 UniProtID: B4E1Z4  
 HGNC gene: CFB  
 Type: Cis-pQTL

**PQGSCSLEGVEIK pc2  
rs12614;rs641153 REF**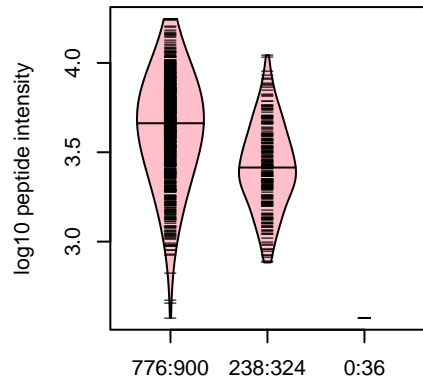

6:31947086:G:A\_A  
 $p = 3.2e-27$ ,  $\text{model} = \text{DOM}$ ,  $N = 1014$

**EBI3 [cis]**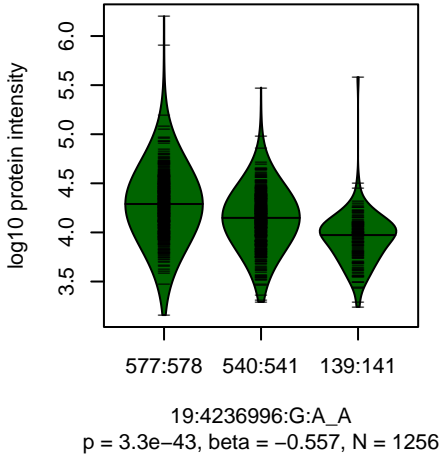**VGPIEATSFILR pc2**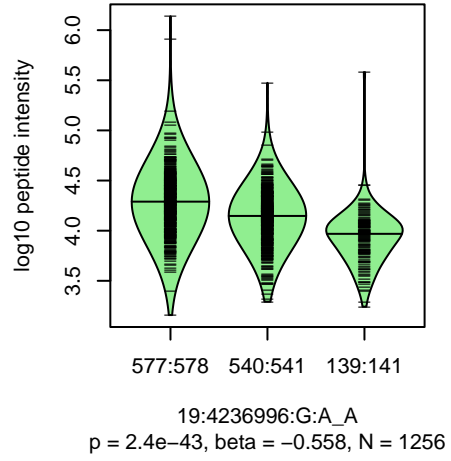**GPPAALTLPK pc2**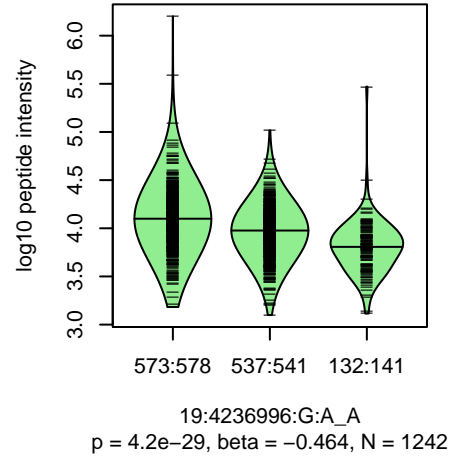**Q14213 NP4**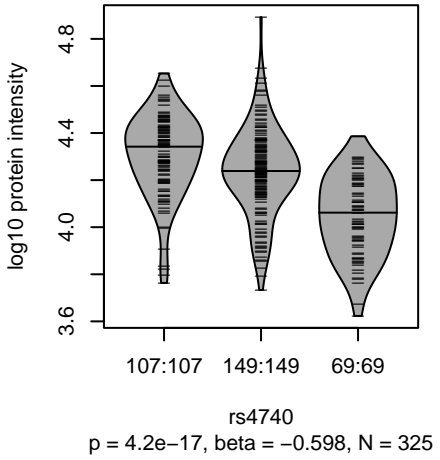**VGPIEATSFILR pc2**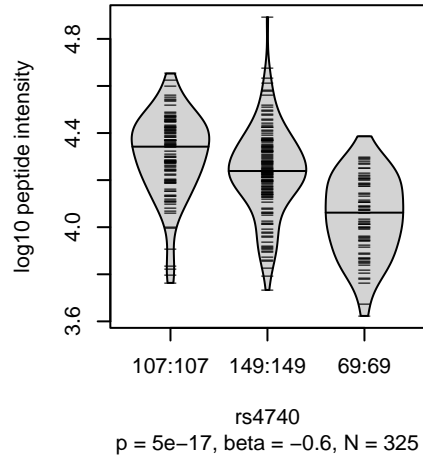**GPPAALTLPK pc2**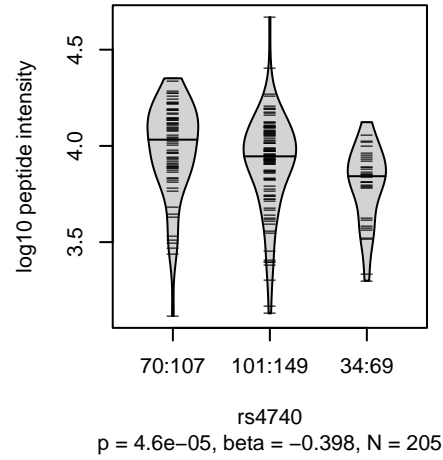

Locus: 22 (Sort: 27)  
 Status: Replicated  
 80% power: Yes  
 SNP: 19:4236996:G:A  
 rsID: rs4740  
 UniProtID: Q14213  
 HGNC gene: EBI3  
 Type: Cis-pQTL

**ERAP1 [cis]**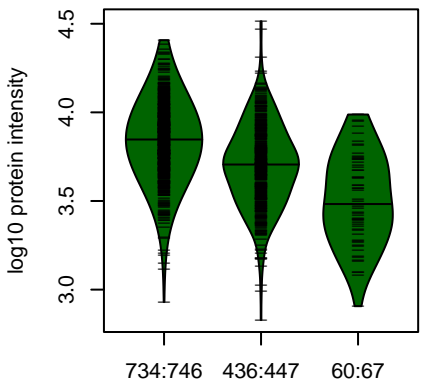

5:96147733:A:G\_G  
 $p = 8.4e-43$ ,  $\beta = -0.638$ ,  $N = 1230$

**GFPLITIVR pc2**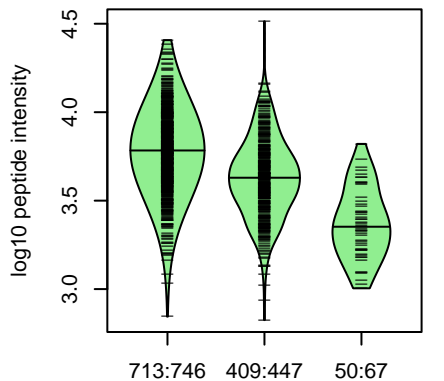

5:96147733:A:G\_G  
 $p = 2.4e-48$ ,  $\beta = -0.706$ ,  $N = 1172$

**TDVLILPEEVEWIK pc2**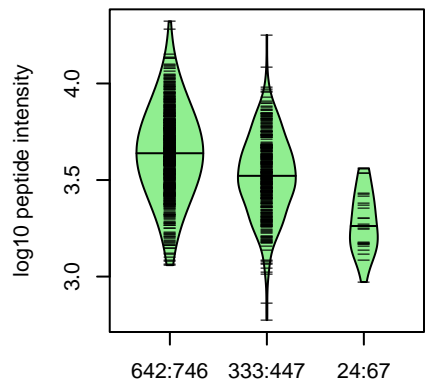

5:96147733:A:G\_G  
 $p = 5.5e-25$ ,  $\beta = -0.594$ ,  $N = 999$

**ASLINNAFQLVLSIGK pc2**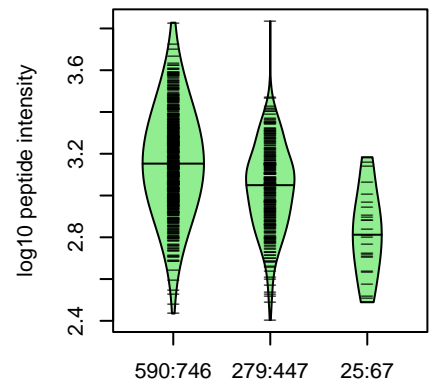

5:96147733:A:G\_G  
 $p = 9.9e-25$ ,  $\beta = -0.618$ ,  $N = 894$

**LQWLLDESFK pc2**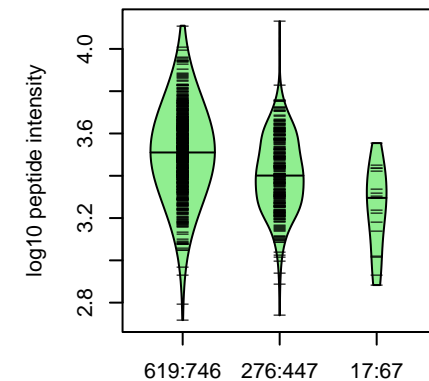

5:96147733:A:G\_G  
 $p = 3.9e-19$ ,  $\beta = -0.563$ ,  $N = 912$

**Q9NZ08 NP5**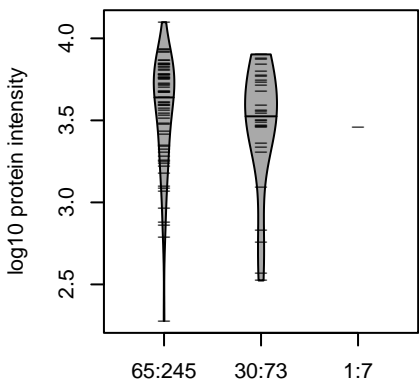

rs10045403  
 $p = 0.28$ ,  $\beta = -0.217$ ,  $N = 96$

**GFPLITIVR pc2**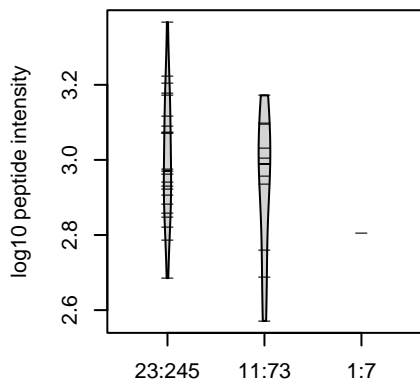

rs10045403  
 $p = 0.24$ ,  $\beta = -0.344$ ,  $N = 35$

**EYLSADAFK pc2**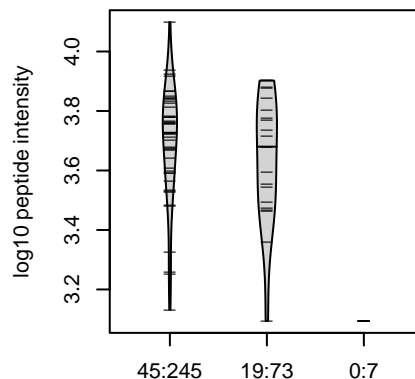

rs10045403  
 $p = 0.35$ ,  $\beta = -0.246$ ,  $N = 64$

**LSEEPLQVLEHPR pc3  
rs26653 REF**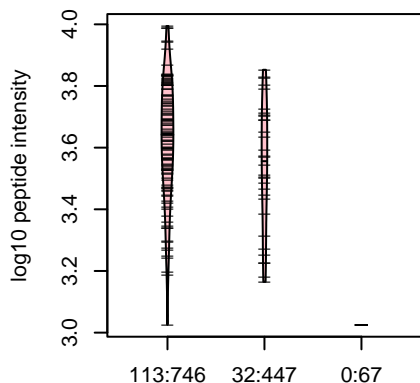

5:96147733:A:G\_G  
 $p = 6.1e-07$ ,  $\text{model} = \text{REC}$ ,  $N = 145$

Locus: 23 (Sort: 28)  
 Status: Not replicated  
 80% power: No  
 SNP: 5:96147733:A:G  
 rsID: rs10045403  
 UniProtID: Q9NZ08  
 HGNC gene: ERAP1  
 Type: Cis-pQTL

**HLA-A [cis]**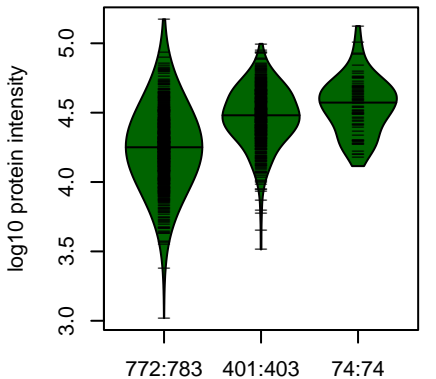

6:31321425:G:A\_A  
 $p = 2.3e-41$ ,  $\beta = 0.607$ ,  $N = 1247$

**FIAGYVDDTQFVR pc2**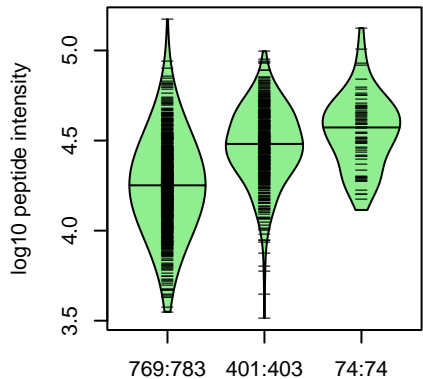

6:31321425:G:A\_A  
 $p = 1.4e-40$ ,  $\beta = 0.601$ ,  $N = 1244$

**DYIALNEDLR pc2**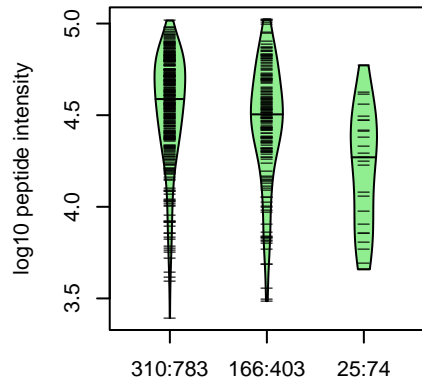

6:31321425:G:A\_A  
 $p = 0.0024$ ,  $\beta = -0.228$ ,  $N = 501$

**THMTHHPISDHEATLR pc3**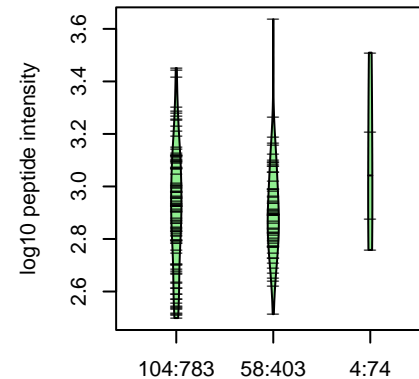

6:31321425:G:A\_A  
 $p = 0.44$ ,  $\beta = 0.109$ ,  $N = 166$

**AYLDGTCVEWLR pc2**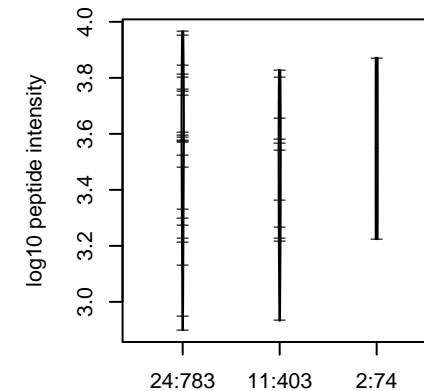

6:31321425:G:A\_A  
 $p = 0.47$ ,  $\beta = -0.19$ ,  $N = 37$

**Q5SRN5 NP1**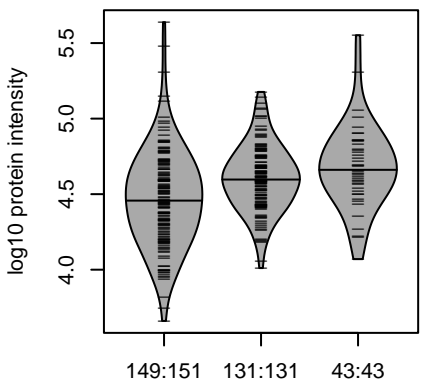

rs9378247  
 $p = 3.5e-06$ ,  $\beta = 0.358$ ,  $N = 323$

**FIAGYVDDTQFVR pc2**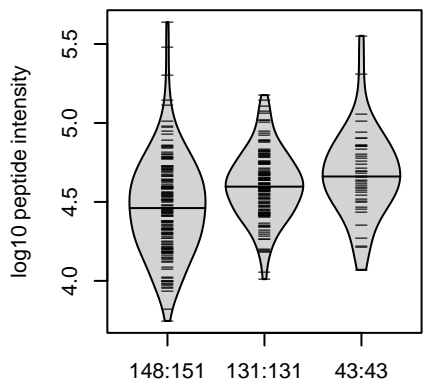

rs9378247  
 $p = 6.1e-06$ ,  $\beta = 0.351$ ,  $N = 322$

**THMTHHPISDHEATLR pc4**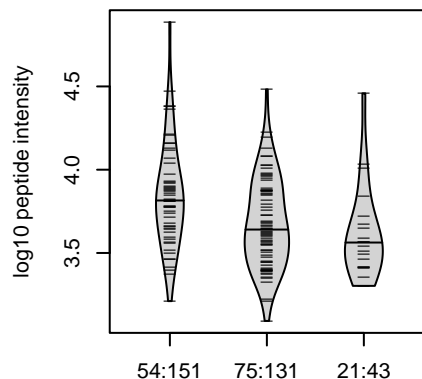

rs9378247  
 $p = 0.00054$ ,  $\beta = -0.403$ ,  $N = 150$

**DYIALNEDLR pc2**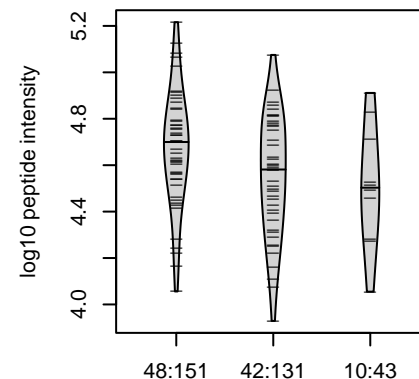

rs9378247  
 $p = 0.0039$ ,  $\beta = -0.416$ ,  $N = 100$

**YTCHVQHEGLPK pc3**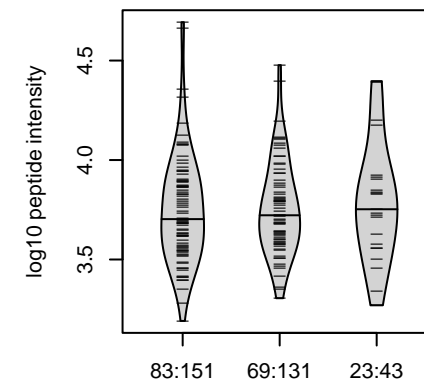

rs9378247  
 $p = 0.58$ ,  $\beta = 0.0591$ ,  $N = 175$

**FSDAASQR pc2  
rs707910 REF**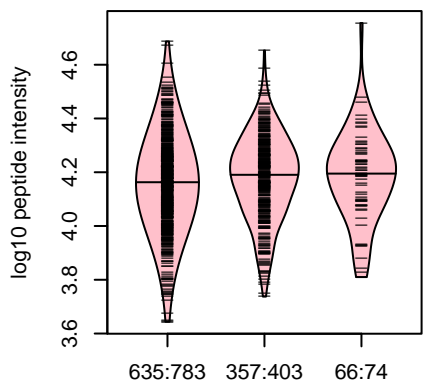

6:31321425:G:A\_A  
 $p = 0.00035$ ,  $\text{model} = \text{REC}$ ,  $N = 1058$

**SWTAADMAAQITQR pc2  
rs1059517 ALT**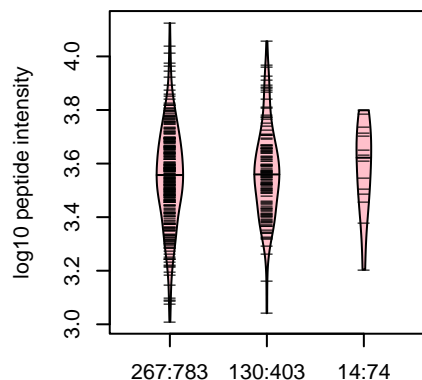

6:31321425:G:A\_A  
 $p = 0.01$ ,  $\text{model} = \text{DOM}$ ,  $N = 411$

**AQSQTDRVDLGLTLR pc3  
rs1071742;rs199474457 REF**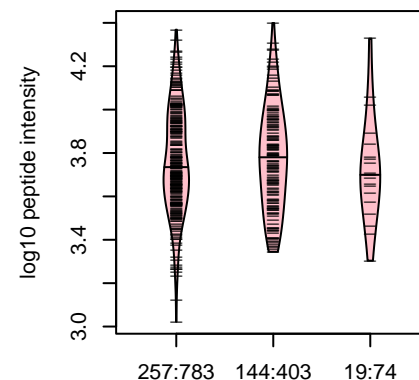

6:31321425:G:A\_A  
 $p = 0.16$ ,  $\text{model} = \text{DOM}$ ,  $N = 420$

**SWTAADMAAQITK pc2  
rs1059517 REF**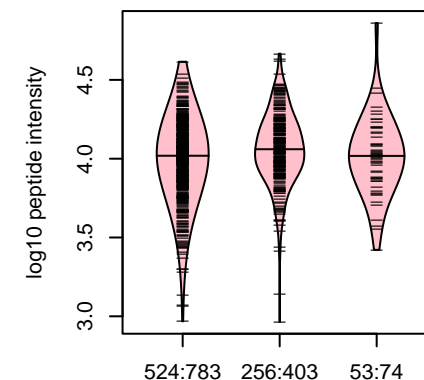

6:31321425:G:A\_A  
 $p = 0.38$ ,  $\text{model} = \text{DOM}$ ,  $N = 833$

Locus: 24 (Sort: 29)  
 Status: Replicated  
 80% power: Yes  
 SNP: 6:31321425:G:A  
 rsID: rs9378247  
 UniProtID: Q5SRN5  
 HGNC gene: HLA-A  
 Type: Cis-pQTL

**PGLYRP2 [cis]**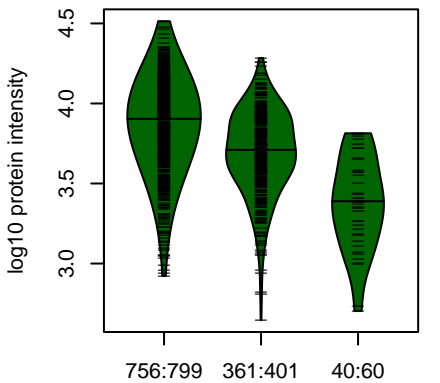

19:15580290:G:A\_A  
 $p = 8.4e-41$ ,  $\beta = -0.682$ ,  $N = 1157$

**TPEPRPSLSHLLSQYYGAGVAR pc**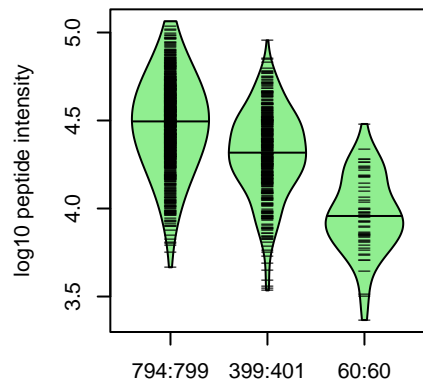

19:15580290:G:A\_A  
 $p = 1.8e-58$ ,  $\beta = -0.741$ ,  $N = 1253$

**EFTEAFLGCPAIHPR pc3**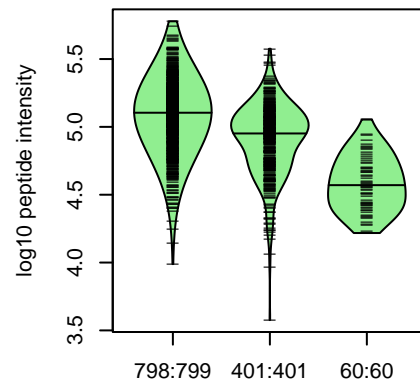

19:15580290:G:A\_A  
 $p = 1.2e-57$ ,  $\beta = -0.735$ ,  $N = 1259$

**TDCPGDALFDLLR pc2**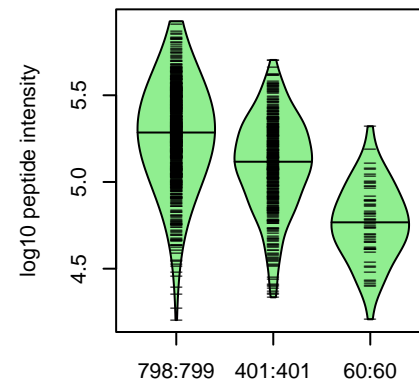

19:15580290:G:A\_A  
 $p = 1.4e-53$ ,  $\beta = -0.71$ ,  $N = 1259$

**GCPDVQASLPDAK pc2**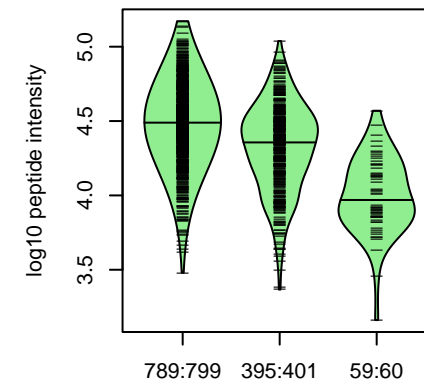

19:15580290:G:A\_A  
 $p = 1.1e-42$ ,  $\beta = -0.642$ ,  $N = 1243$

**Q96PD5 NP4**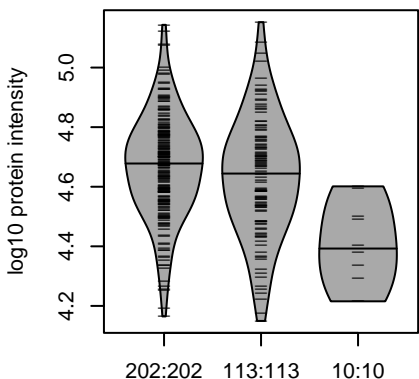

rs36020076  
 $p = 0.0015$ ,  $\beta = -0.314$ ,  $N = 325$

**'GVVLAPDGSTVAVEPLLAGLEAGLQC**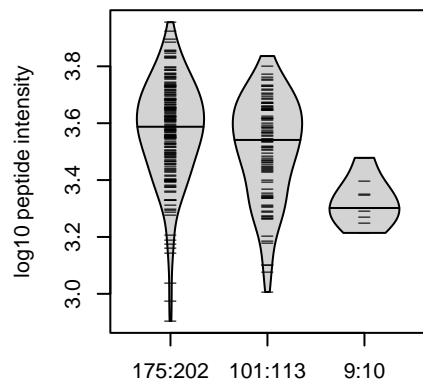

rs36020076  
 $p = 4e-05$ ,  $\beta = -0.427$ ,  $N = 285$

**TDCPGDALFDLLR pc2**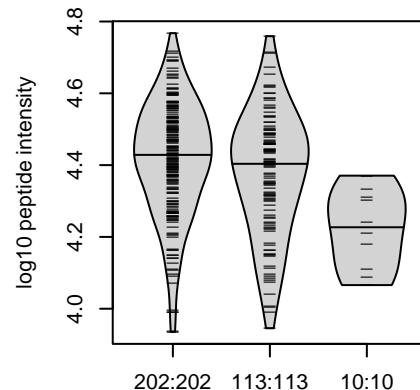

rs36020076  
 $p = 0.0023$ ,  $\beta = -0.301$ ,  $N = 325$

**EFTEAFLGCPAIHPR pc2**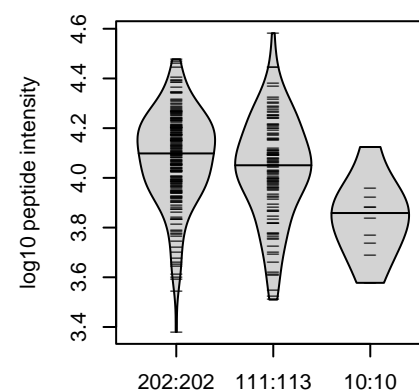

rs36020076  
 $p = 0.0028$ ,  $\beta = -0.296$ ,  $N = 323$

**GCPDVQASLPDAK pc2**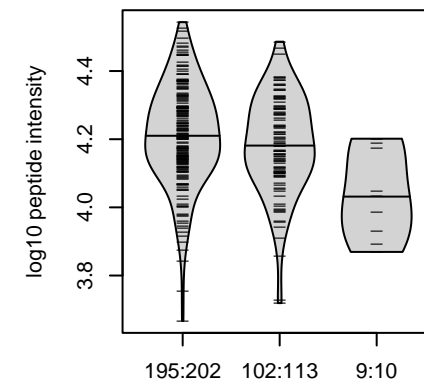

rs36020076  
 $p = 0.0052$ ,  $\beta = -0.287$ ,  $N = 306$

**AFLNGALDGVILGDYLSR pc3  
rs892145 ALT**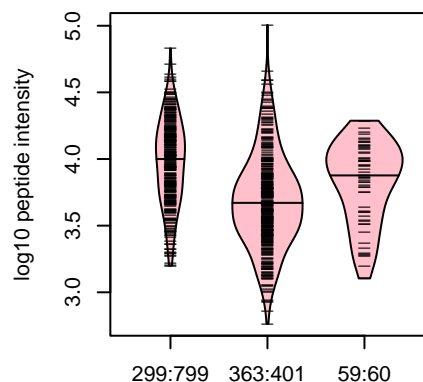

19:15580290:G:A\_A  
 $p = 7.7e-88$ ,  $\text{model} = \text{REC}$ ,  $N = 721$

**WGAAPYR pc2  
rs34440547 REF**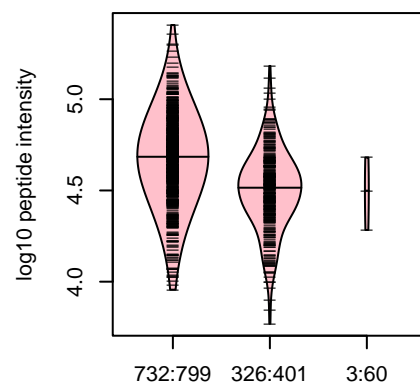

19:15580290:G:A\_A  
 $p = 2.4e-45$ ,  $\text{model} = \text{DOM}$ ,  $N = 1061$

**EVAQHDVR pc2  
rs733731 ALT**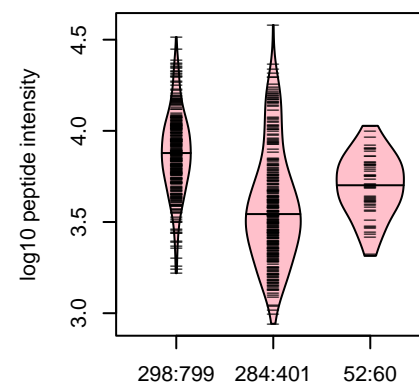

19:15580290:G:A\_A  
 $p = 7.3e-35$ ,  $\text{model} = \text{REC}$ ,  $N = 634$

**ASLLTMAFLNGALDGVILGDYLSR pc3  
rs892145 REF**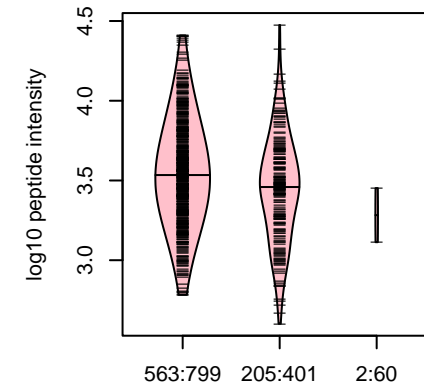

19:15580290:G:A\_A  
 $p = 1.4e-22$ ,  $\text{model} = \text{DOM}$ ,  $N = 770$

Locus: 25 (Sort: 30)  
 Status: Not replicated  
 80% power: Yes  
 SNP: 19:15580290:G:A  
 rsID: rs36020076  
 UniProtID: Q96PD5  
 HGNC gene: PGLYRP2  
 Type: Cis-pQTL

**SERPINF2 [trans]**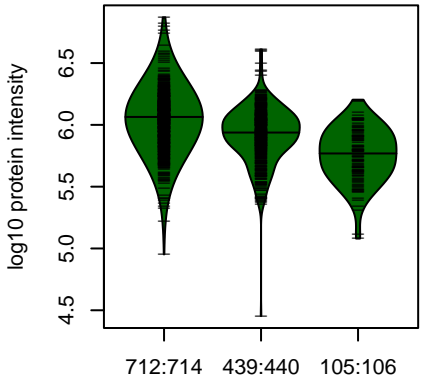

5:176839898:T:C\_T  
 $p = 2.4e-39$ ,  $\beta = -0.552$ ,  $N = 1256$

**SPPGVCSR pc2**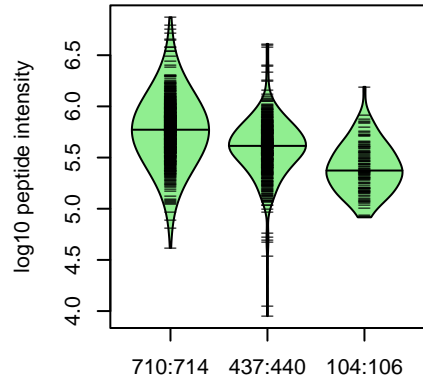

5:176839898:T:C\_T  
 $p = 4.4e-46$ ,  $\beta = -0.598$ ,  $N = 1251$

**LGNGEPGGQTALK pc2**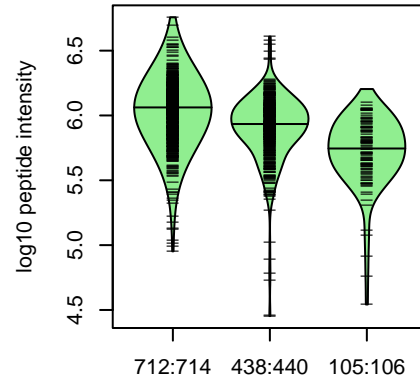

5:176839898:T:C\_T  
 $p = 1.6e-39$ ,  $\beta = -0.553$ ,  $N = 1255$

**EQQDSPGNK pc2**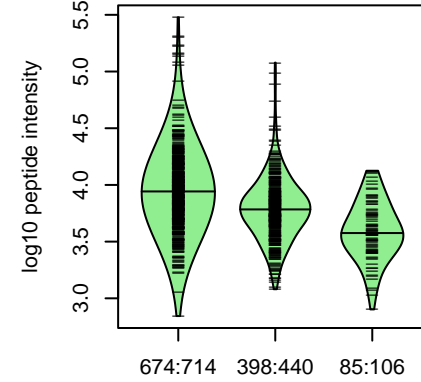

5:176839898:T:C\_T  
 $p = 2.4e-34$ ,  $\beta = -0.55$ ,  $N = 1157$

**DFLQSLK pc2**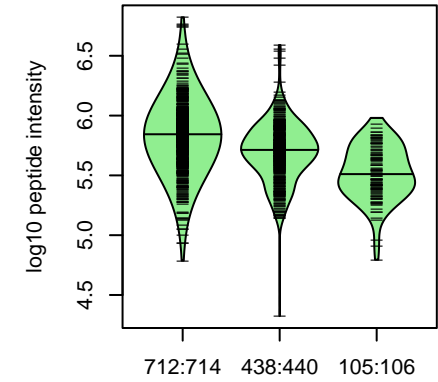

5:176839898:T:C\_T  
 $p = 3.4e-34$ ,  $\beta = -0.515$ ,  $N = 1255$

**P08697 NP1**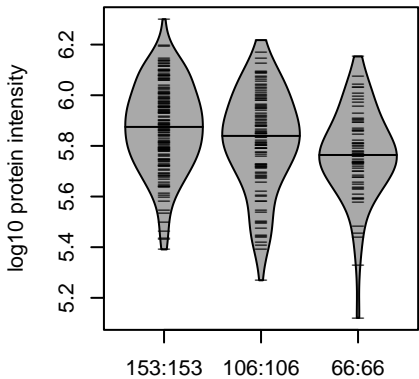

rs2731673  
 $p = 0.066$ ,  $\beta = -0.129$ ,  $N = 325$

**SPPGVCSR pc2**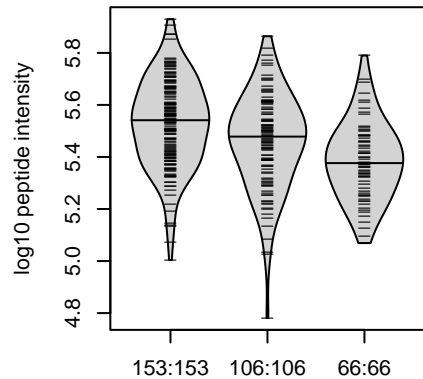

rs2731673  
 $p = 0.00063$ ,  $\beta = -0.239$ ,  $N = 325$

**DFLQSLK pc2**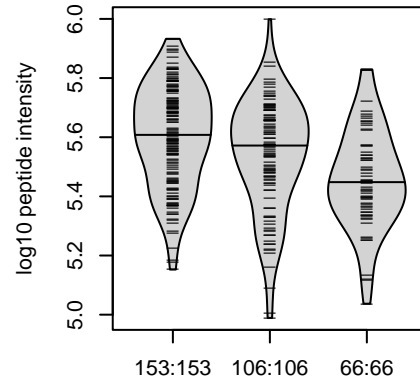

rs2731673  
 $p = 0.0054$ ,  $\beta = -0.195$ ,  $N = 325$

**EQQDSPGNK pc2**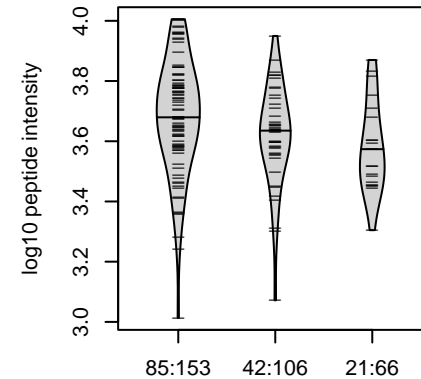

rs2731673  
 $p = 0.039$ ,  $\beta = -0.227$ ,  $N = 148$

**LGNGEPGGQTALK pc2**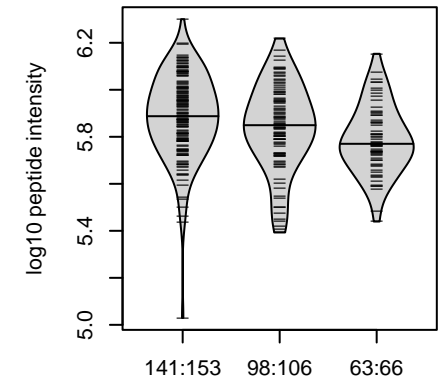

rs2731673  
 $p = 0.11$ ,  $\beta = -0.116$ ,  $N = 302$

**QLTSGPNQEQVSPLTLK pc3  
rs2070863 REF**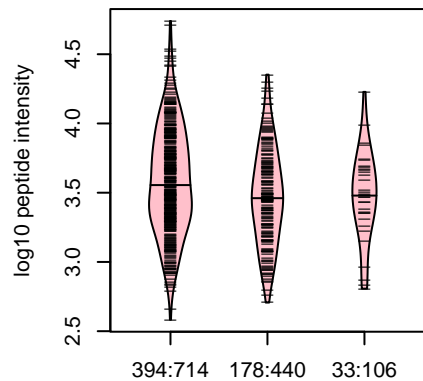

5:176839898:T:C\_T  
 $p = 6.1e-09$ ,  $\text{model} = \text{REC}$ ,  $N = 605$

Locus: 26 (Sort: 31)  
 Status: Not replicated  
 80% power: Yes  
 SNP: 5:176839898:T:C  
 rsID: rs2731673  
 UniProtID: P08697  
 HGNC gene: SERPINF2  
 Type: Trans-pQTL

**SERPING1 [trans]**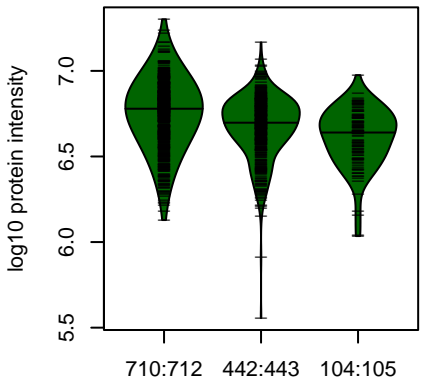

5:176839890:T:G\_T  
 $p = 1.6e-21$ ,  $\beta = -0.408$ ,  $N = 1256$

**LEDMEQALSPSVFK pc2**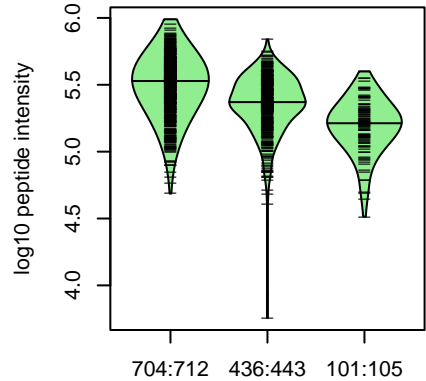

5:176839890:T:G\_T  
 $p = 4.5e-46$ ,  $\beta = -0.602$ ,  $N = 1241$

**YPVAHFIDQTLK pc3**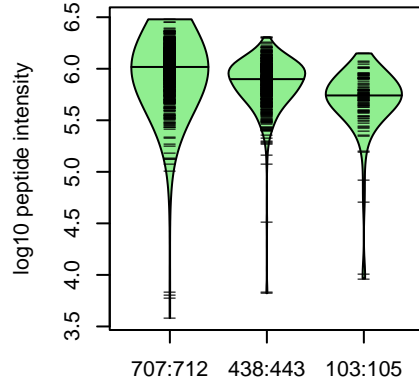

5:176839890:T:G\_T  
 $p = 7.3e-35$ ,  $\beta = -0.523$ ,  $N = 1248$

**HRLEDMEQALSPSVFK pc4**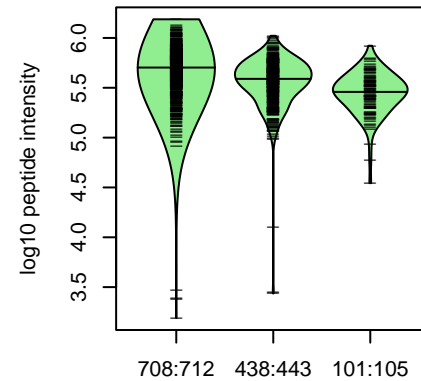

5:176839890:T:G\_T  
 $p = 6.5e-30$ ,  $\beta = -0.487$ ,  $N = 1247$

**LVLLNAIYLSAK pc2**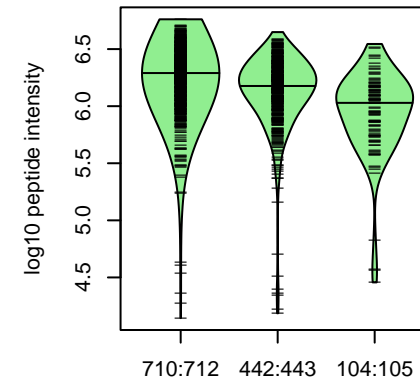

5:176839890:T:G\_T  
 $p = 3.9e-26$ ,  $\beta = -0.451$ ,  $N = 1256$

**P05155 NP1**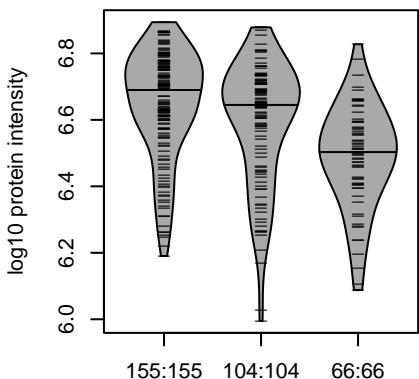

rs2731674  
 $p = 0.01$ ,  $\beta = -0.177$ ,  $N = 325$

**LYHAFSAMK pc2**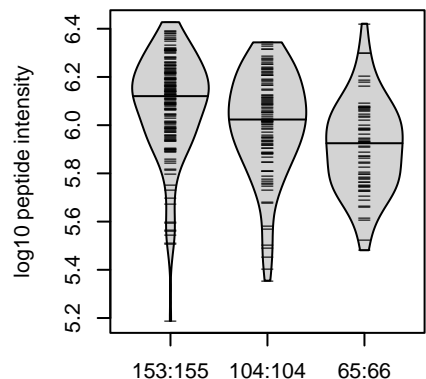

rs2731674  
 $p = 7.8e-05$ ,  $\beta = -0.277$ ,  $N = 322$

**TLYSSSPR pc2**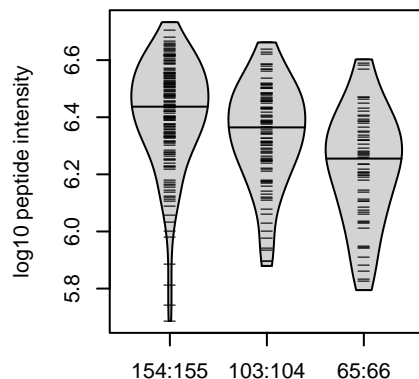

rs2731674  
 $p = 0.00021$ ,  $\beta = -0.26$ ,  $N = 322$

**LEDMEQALSPSVFK pc2**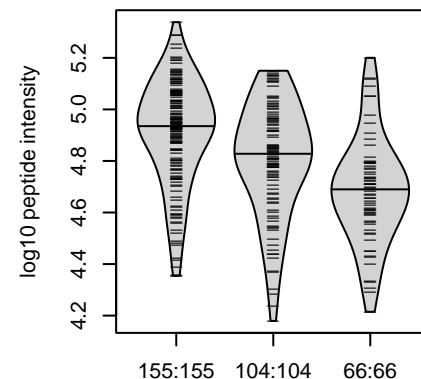

rs2731674  
 $p = 0.00094$ ,  $\beta = -0.231$ ,  $N = 325$

**HRLEDMEQALSPSVFK pc4**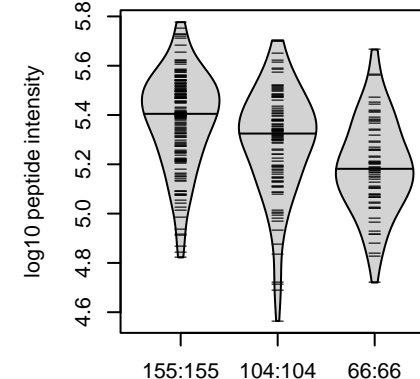

rs2731674  
 $p = 0.0013$ ,  $\beta = -0.225$ ,  $N = 325$

**TLLVFEVQQPFLVLWDQQHK pc4  
rs4926 REF**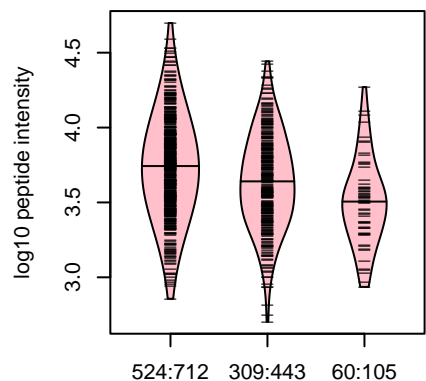

5:176839890:T:G\_T  
 $p = 0.0017$ ,  $\text{model} = \text{DOM}$ ,  $N = 893$

**TLLVFEVQQPFLMLWDQQHK pc3  
rs4926 ALT**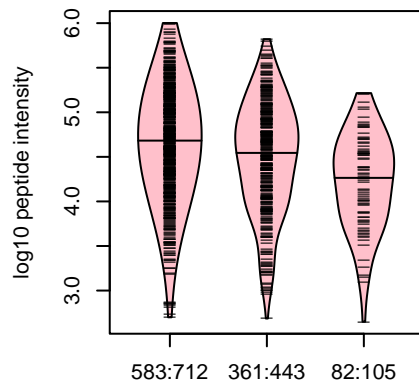

5:176839890:T:G\_T  
 $p = 0.36$ ,  $\text{model} = \text{DOM}$ ,  $N = 1026$

Locus: 26 (Sort: 32)  
 Status: Not replicated  
 80% power: Yes  
 SNP: 5:176839890:T:G  
 rsID: rs2731674  
 UniProtID: P05155  
 HGNC gene: SERPING1  
 Type: Trans-pQTL



**F12 [cis]**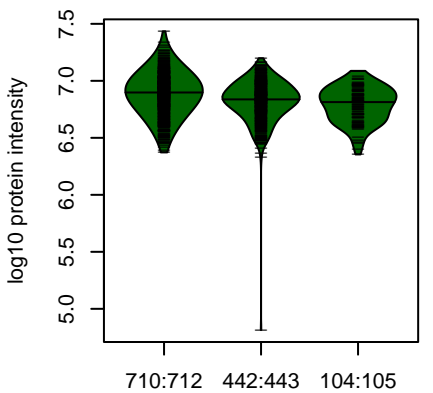

5:176839890:T:G\_T  
 $p = 1e-12$ ,  $\beta = -0.308$ ,  $N = 1256$

**GPD4HCQR pc2**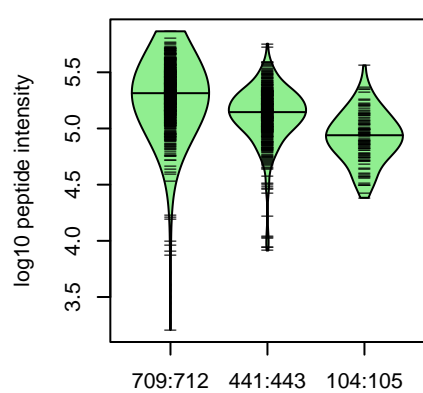

5:176839890:T:G\_T  
 $p = 7.4e-60$ ,  $\beta = -0.676$ ,  $N = 1254$

**NPDNDIRPWCFVLNR pc3**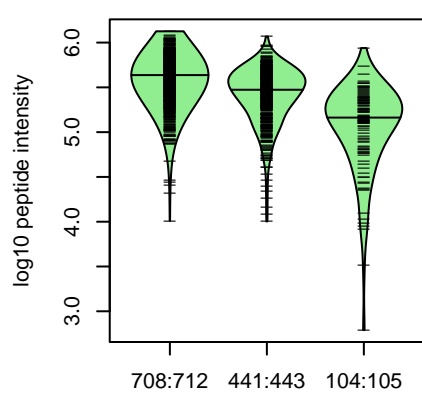

5:176839890:T:G\_T  
 $p = 9.5e-53$ ,  $\beta = -0.637$ ,  $N = 1253$

**EKCFEPQLLR pc3**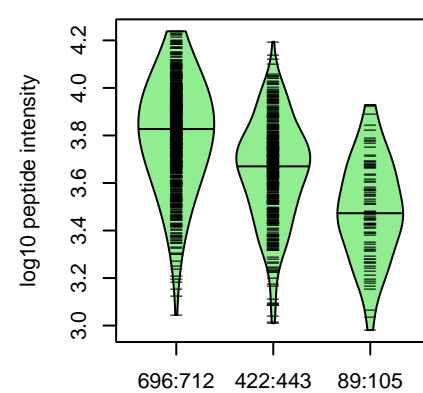

5:176839890:T:G\_T  
 $p = 1.3e-47$ ,  $\beta = -0.631$ ,  $N = 1207$

**PAPEDLTVVLGQER pc2**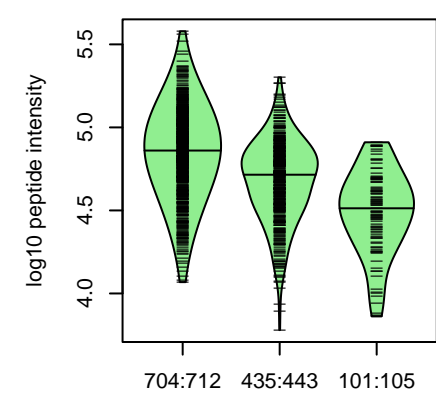

5:176839890:T:G\_T  
 $p = 1.5e-44$ ,  $\beta = -0.593$ ,  $N = 1240$

**P00748 NP1**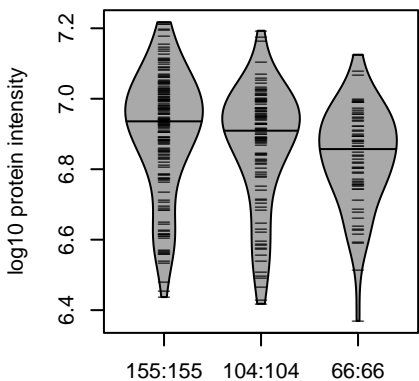

rs2731674  
 $p = 0.23$ ,  $\beta = -0.0847$ ,  $N = 325$

**GPD4HCQR pc2**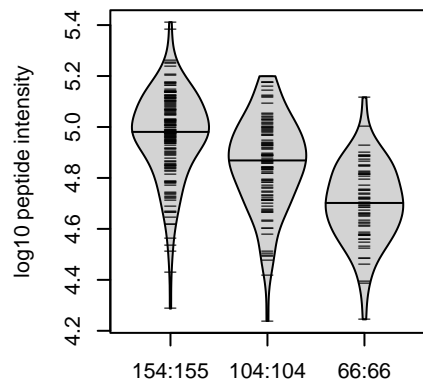

rs2731674  
 $p = 1e-10$ ,  $\beta = -0.442$ ,  $N = 324$

**NPDNDIRPWCFVLNR pc3**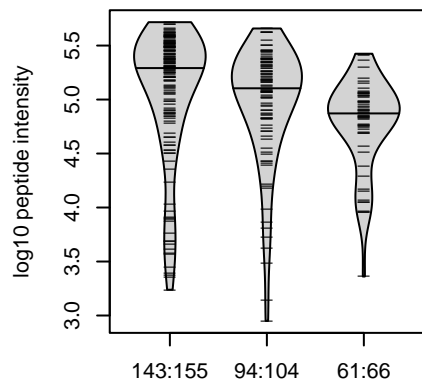

rs2731674  
 $p = 0.00027$ ,  $\beta = -0.264$ ,  $N = 298$

**NHSCEPCQLAVR pc3**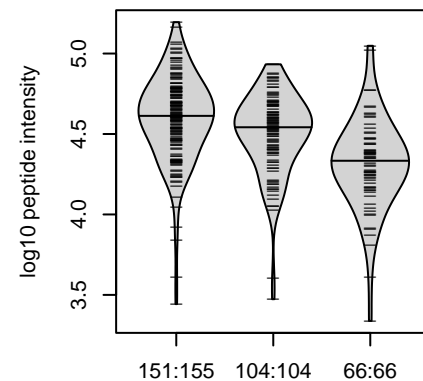

rs2731674  
 $p = 0.00071$ ,  $\beta = -0.238$ ,  $N = 321$

**PAPEDLTVVLGQER pc2**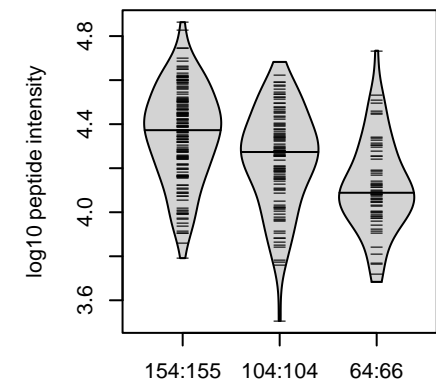

rs2731674  
 $p = 0.00092$ ,  $\beta = -0.234$ ,  $N = 322$

Locus: 26 (Sort: 33)  
 Status: Not replicated  
 80% power: No  
 SNP: 5:176839890:T:G  
 rsID: rs2731674  
 UniProtID: P00748  
 HGNC gene: F12  
 Type: Cis-pQTL

**IL7R [cis]**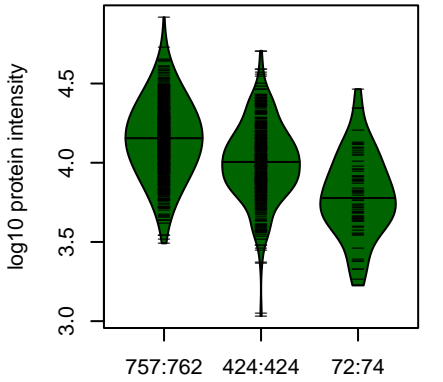

5:35874575:C:T\_T  
 $p = 3.3e-39$ ,  $\beta = -0.592$ ,  $N = 1253$

**LQEIFYETK pc2**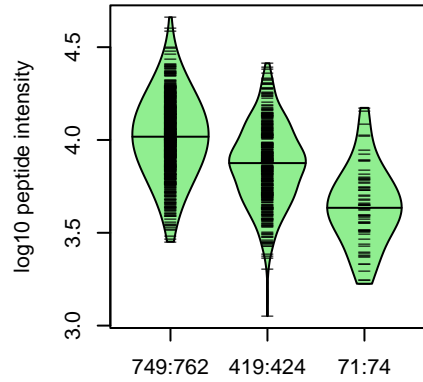

5:35874575:C:T\_T  
 $p = 5.1e-54$ ,  $\beta = -0.694$ ,  $N = 1239$

**VLMHDVAYR pc2**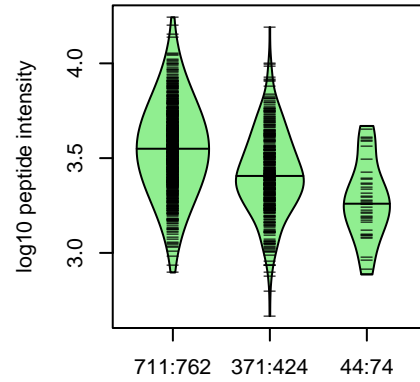

5:35874575:C:T\_T  
 $p = 2.2e-27$ ,  $\beta = -0.554$ ,  $N = 1126$

**LQPAAMYEIK pc2**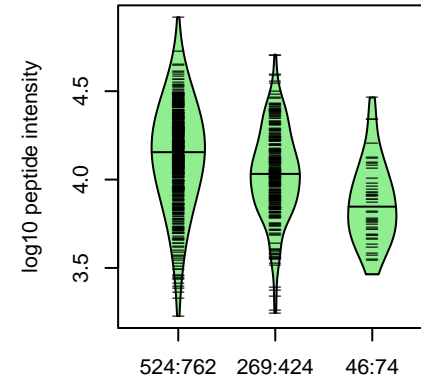

5:35874575:C:T\_T  
 $p = 1.2e-11$ ,  $\beta = -0.386$ ,  $N = 839$

**SIPDHYFK pc2**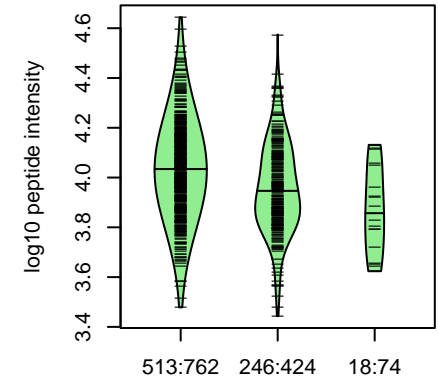

5:35874575:C:T\_T  
 $p = 2e-09$ ,  $\beta = -0.401$ ,  $N = 777$

**P16871 NP2**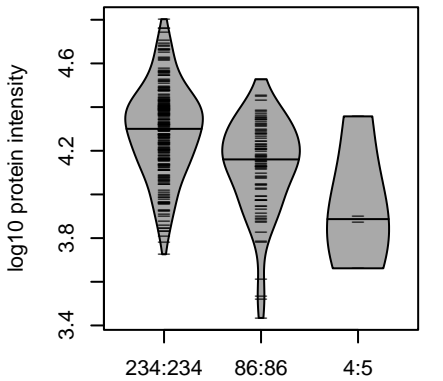

rs6897932  
 $p = 3.6e-08$ ,  $\beta = -0.622$ ,  $N = 324$

**LQEIFYETK pc2**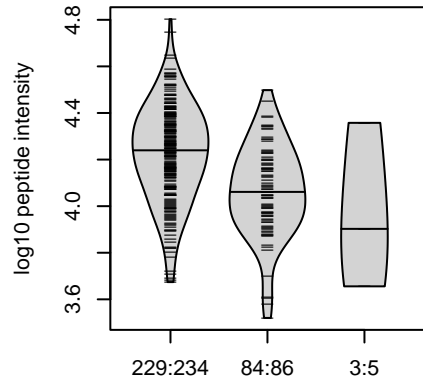

rs6897932  
 $p = 5.3e-08$ ,  $\beta = -0.626$ ,  $N = 316$

**VLMHDVAYR pc2**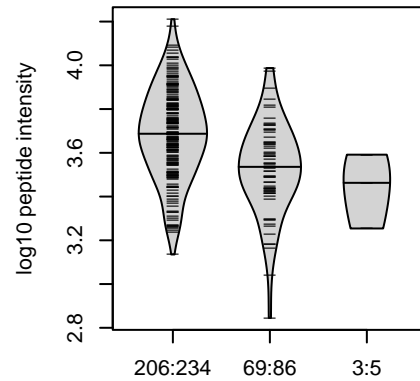

rs6897932  
 $p = 1.6e-07$ ,  $\beta = -0.648$ ,  $N = 278$

**LQPAAMYEIK pc2**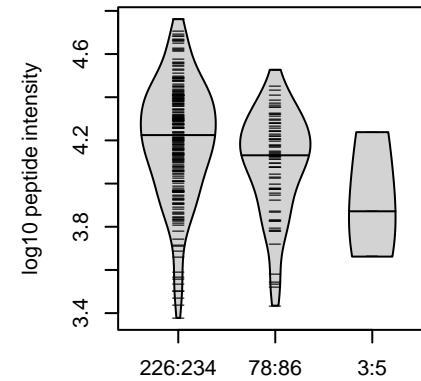

rs6897932  
 $p = 0.00048$ ,  $\beta = -0.417$ ,  $N = 307$

Locus: 27 (Sort: 34)  
 Status: Replicated  
 80% power: Yes  
 SNP: 5:35874575:C:T  
 rsID: rs6897932  
 UniProtID: P16871  
 HGNC gene: IL7R  
 Type: Cis-pQTL

**TIMP3 [cis]**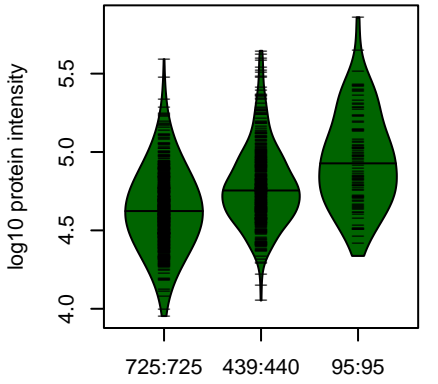

22:33159092:A:G\_A  
 $p = 3.6e-38$ ,  $\beta = 0.554$ ,  $N = 1259$

**SCYYLPCFVTSK pc2**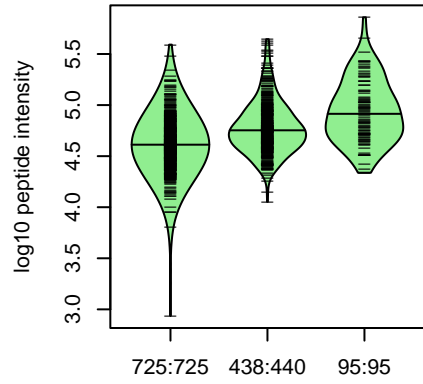

22:33159092:A:G\_A  
 $p = 7.7e-40$ ,  $\beta = 0.566$ ,  $N = 1258$

**EGPFGTLVYTIK pc2**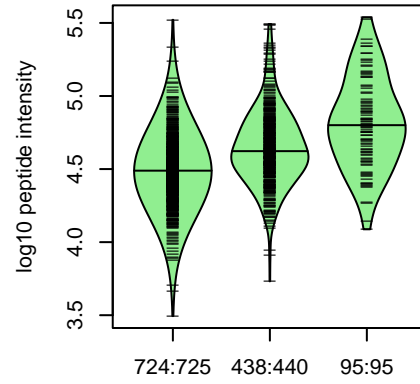

22:33159092:A:G\_A  
 $p = 3.1e-39$ ,  $\beta = 0.562$ ,  $N = 1257$

**YHLGCNCK pc2**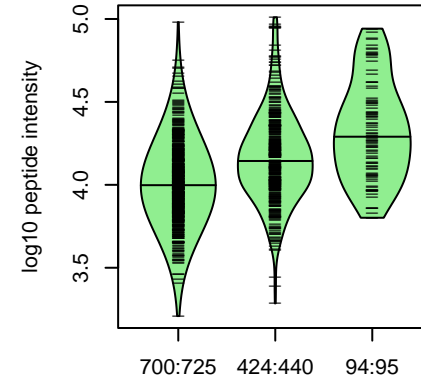

22:33159092:A:G\_A  
 $p = 3.3e-35$ ,  $\beta = 0.539$ ,  $N = 1218$

**MPHVQYIHTEASESLCGLK pc4**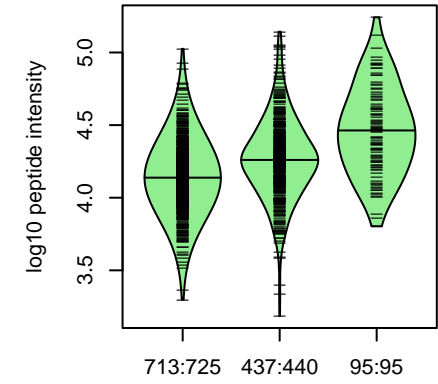

22:33159092:A:G\_A  
 $p = 6.3e-30$ ,  $\beta = 0.493$ ,  $N = 1245$

**P35625 NP4**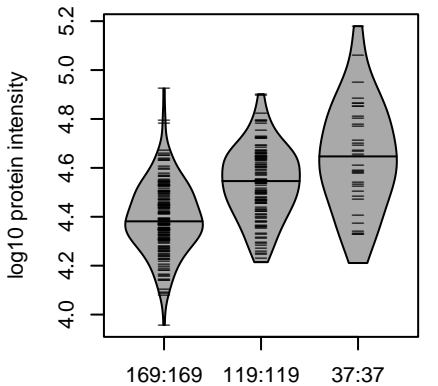

rs4821097  
 $p = 1.9e-15$ ,  $\beta = 0.594$ ,  $N = 325$

**SCYYLPCFVTSK pc2**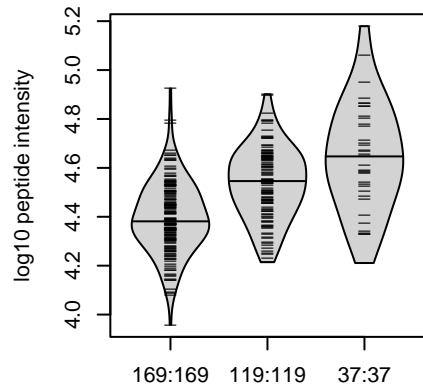

rs4821097  
 $p = 1.4e-15$ ,  $\beta = 0.609$ ,  $N = 325$

**MPHVQYIHTEASESLCGLK pc4**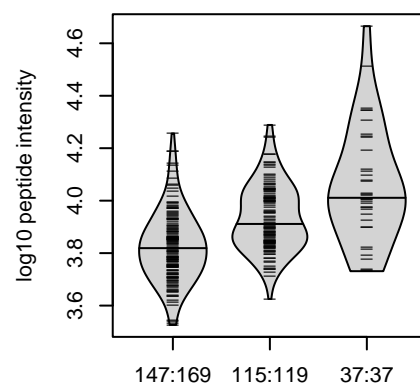

rs4821097  
 $p = 1.8e-14$ ,  $\beta = 0.602$ ,  $N = 299$

**YHLGCNCK pc2**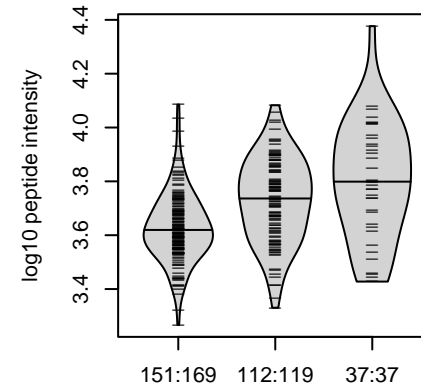

rs4821097  
 $p = 2.9e-08$ ,  $\beta = 0.444$ ,  $N = 300$

**EGPFGTLVYTIK pc2**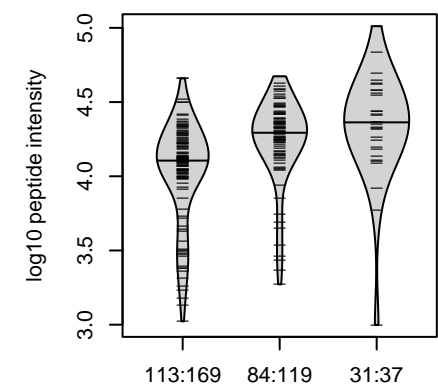

rs4821097  
 $p = 2.2e-07$ ,  $\beta = 0.463$ ,  $N = 228$

Locus: 28 (Sort: 35)  
 Status: Replicated  
 80% power: Yes  
 SNP: 22:33159092:A:G  
 rsID: rs4821097  
 UniProtID: P35625  
 HGNC gene: TIMP3  
 Type: Cis-pQTL

**PRB1 [cis]**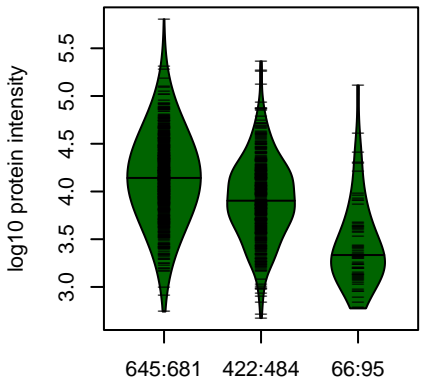

12:11522616:G:A\_G  
 $p = 3.8e-38$ ,  $\beta = -0.608$ ,  $N = 1133$

**PQGPPPQGDK pc2**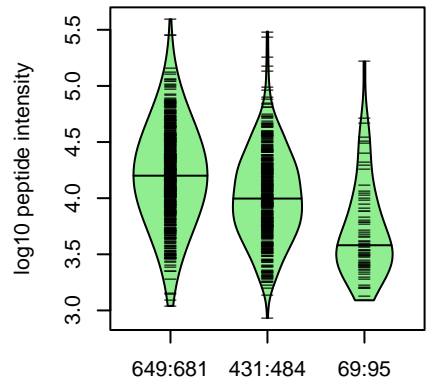

12:11522616:G:A\_G  
 $p = 5.2e-33$ ,  $\beta = -0.56$ ,  $N = 1149$

**PQGPPAQGGSK pc2**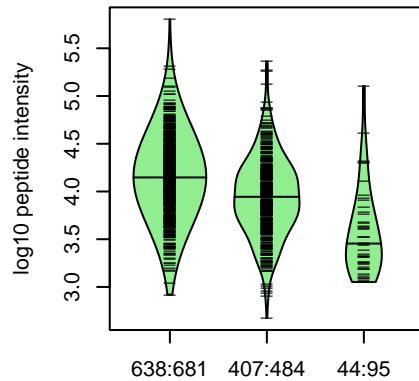

12:11522616:G:A\_G  
 $p = 5.5e-28$ ,  $\beta = -0.561$ ,  $N = 1089$

**PQGPPPQGGK pc2**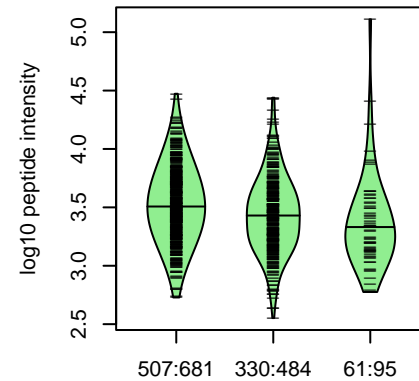

12:11522616:G:A\_G  
 $p = 1e-08$ ,  $\beta = -0.304$ ,  $N = 898$

**PQGPPPPGK pc2**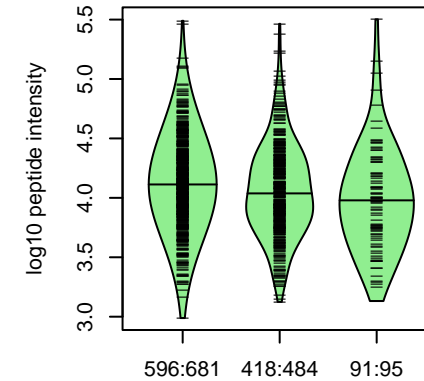

12:11522616:G:A\_G  
 $p = 2.5e-06$ ,  $\beta = -0.218$ ,  $N = 1105$

**A0A4W8X8U3 NP4**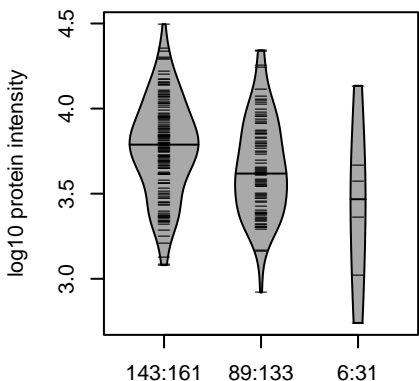

rs7966710  
 $p = 7.1e-05$ ,  $\beta = -0.462$ ,  $N = 238$

**PQGPPPQGDK pc2**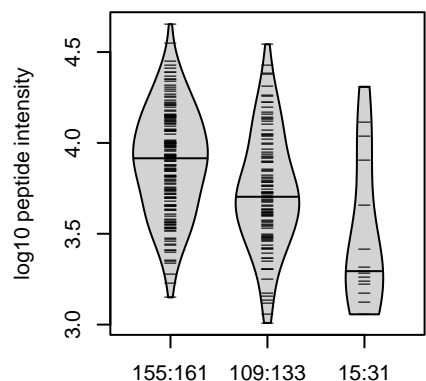

rs7966710  
 $p = 1.7e-09$ ,  $\beta = -0.576$ ,  $N = 279$

**PQGPPPPGK pc2**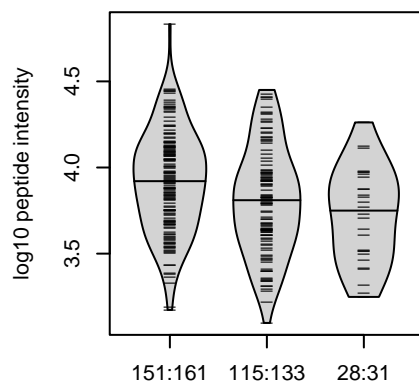

rs7966710  
 $p = 2.7e-05$ ,  $\beta = -0.361$ ,  $N = 294$

**PQGPPPQGGNK pc2**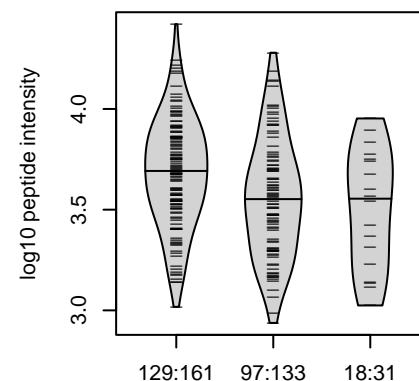

rs7966710  
 $p = 2.8e-05$ ,  $\beta = -0.413$ ,  $N = 244$

**PQGPPAQGGSK pc2**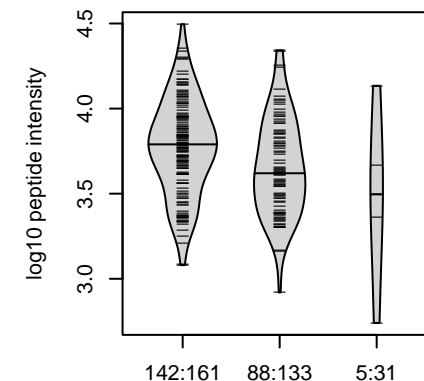

rs7966710  
 $p = 0.00018$ ,  $\beta = -0.443$ ,  $N = 235$

Locus: 29 (Sort: 36)  
 Status: Replicated  
 80% power: Yes  
 SNP: 12:11522616:G:A  
 rsID: rs7966710  
 UniProtID: A0A4W8X8U3  
 HGNC gene: PRB1  
 Type: Cis-pQTL

**C2orf40 [cis]**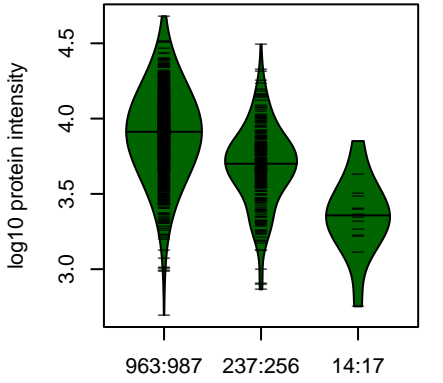

2:106687456:G:C\_C  
 $p = 5.9e-38$ ,  $\beta = -0.809$ ,  $N = 1214$

**FEDDITYWLNR pc2**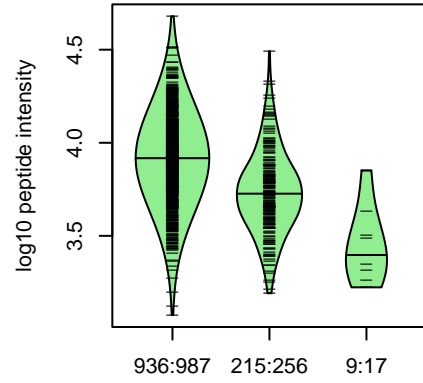

2:106687456:G:C\_C  
 $p = 3.2e-32$ ,  $\beta = -0.799$ ,  $N = 1160$

**HYDEDSAIGPR pc2**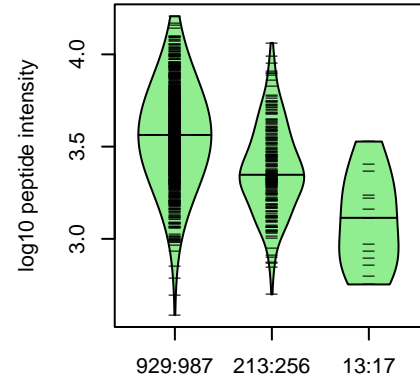

2:106687456:G:C\_C  
 $p = 3.7e-31$ ,  $\beta = -0.765$ ,  $N = 1155$

**NGHEYYGDIYQR pc3**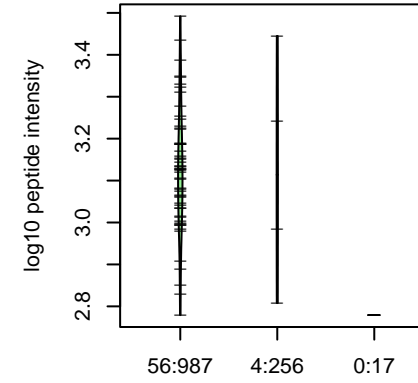

2:106687456:G:C\_C  
 $p = 0.24$ ,  $\beta = 0.579$ ,  $N = 60$

**Q9H1Z8 NP2**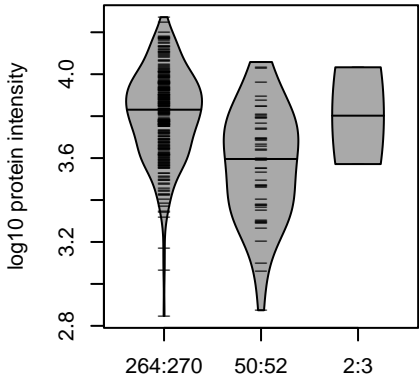

rs13014521  
 $p = 4.5e-09$ ,  $\beta = -0.795$ ,  $N = 316$

**FEDDITYWLNR pc2**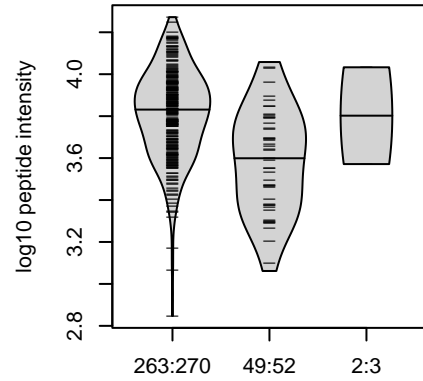

rs13014521  
 $p = 1.6e-08$ ,  $\beta = -0.785$ ,  $N = 314$

**HYDEDSAIGPR pc2**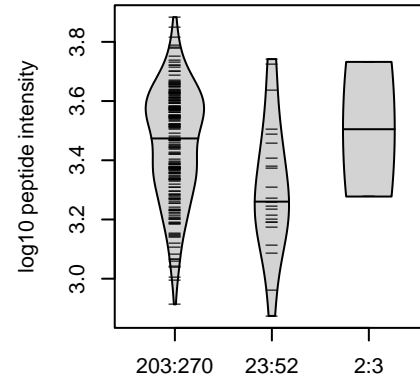

rs13014521  
 $p = 0.016$ ,  $\beta = -0.449$ ,  $N = 228$

Locus: 30 (Sort: 37)  
 Status: Replicated  
 80% power: Yes  
 SNP: 2:106687456:G:C  
 rsID: rs13014521  
 UniProtID: Q9H1Z8  
 HGNC gene: C2orf40  
 Type: Cis-pQTL

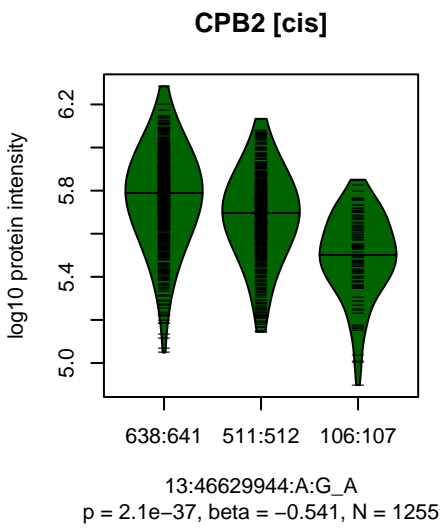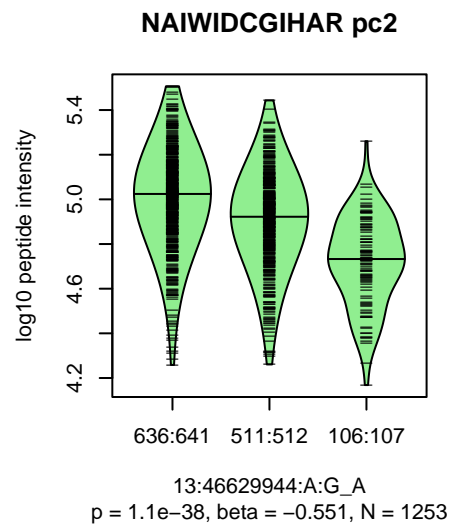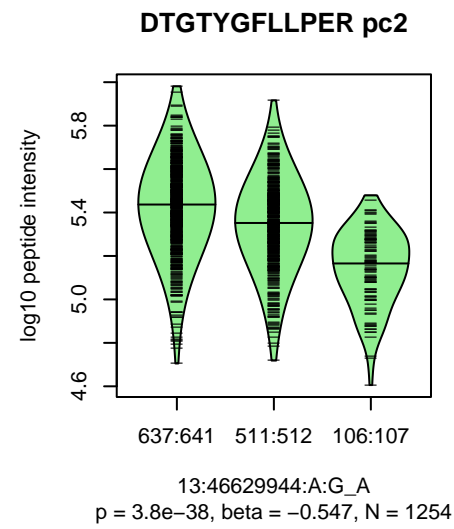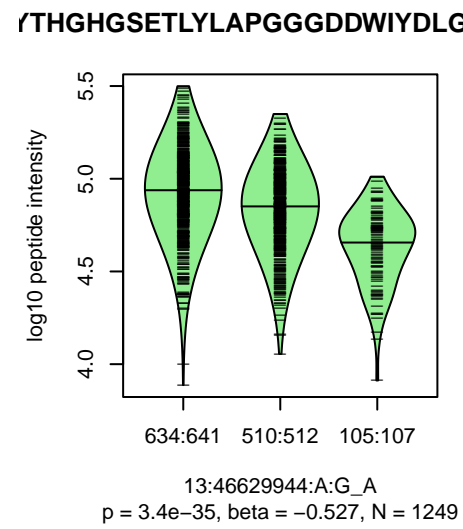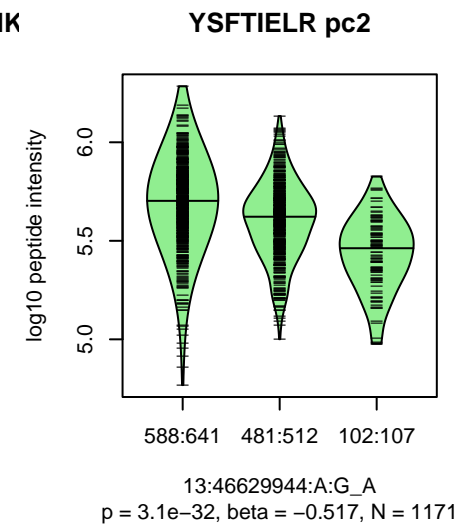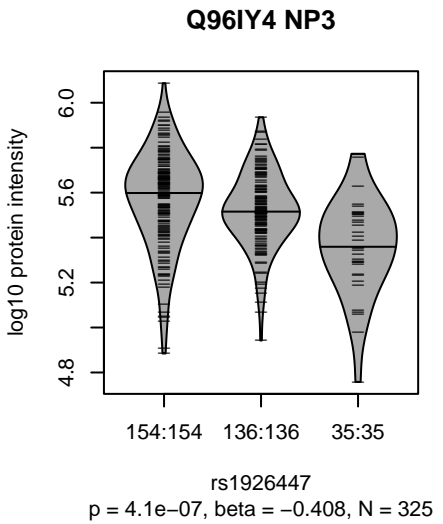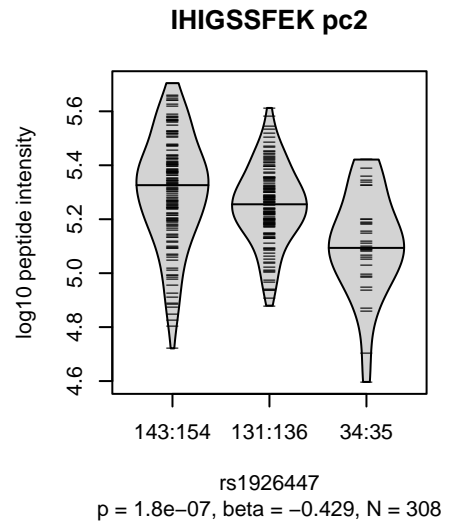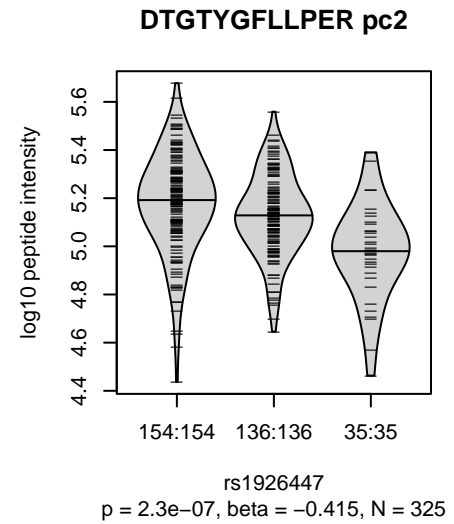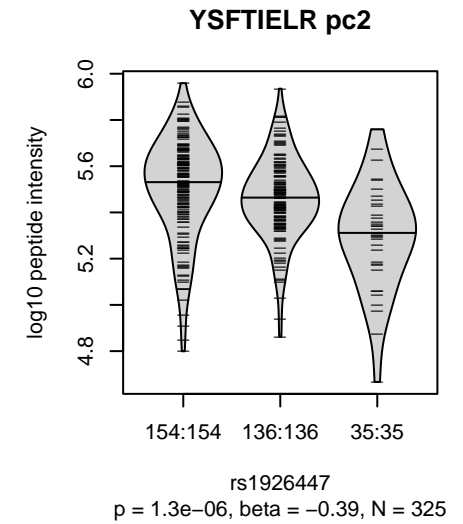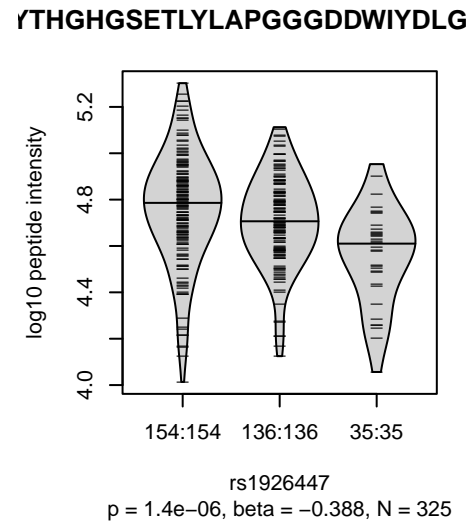

Locus: 31 (Sort: 38)  
 Status: Replicated  
 80% power: Yes  
 SNP: 13:46629944:A:G  
 rsID: rs1926447  
 UniProtID: Q96IY4  
 HGNC gene: CPB2  
 Type: Cis-pQTL

**GALC [cis]**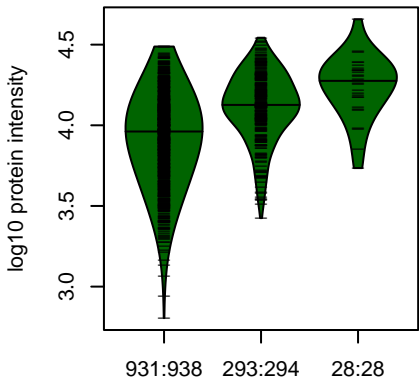

14:88496080:G:T\_T  
 $p = 4.5e-37$ ,  $\beta = 0.7$ ,  $N = 1252$

**SLWTDIPVNFPK pc2**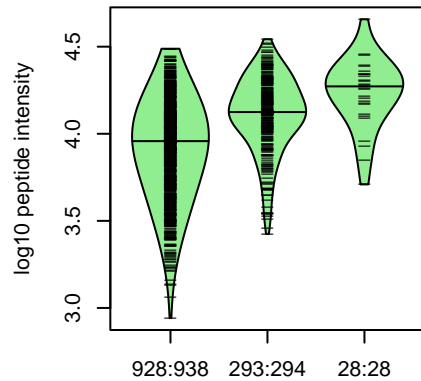

14:88496080:G:T\_T  
 $p = 8.2e-37$ ,  $\beta = 0.697$ ,  $N = 1249$

**GSFSEIPELQVWYTK pc2**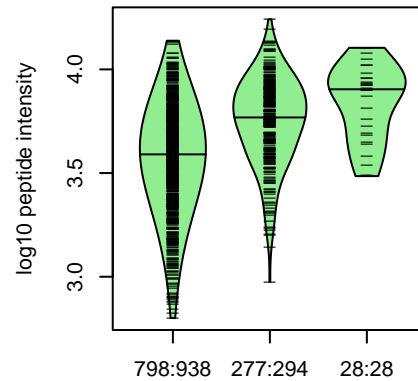

14:88496080:G:T\_T  
 $p = 2.7e-30$ ,  $\beta = 0.651$ ,  $N = 1103$

**GYEWLLMK pc2**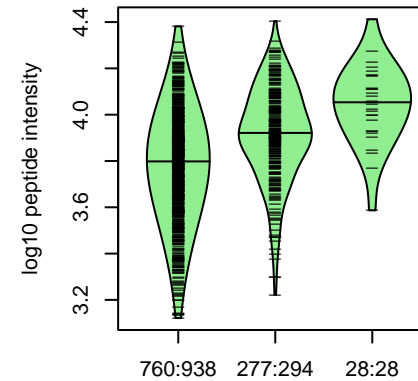

14:88496080:G:T\_T  
 $p = 2.5e-24$ ,  $\beta = 0.586$ ,  $N = 1065$

**VTGDLAGWIIYALGRVEVTAK pc3**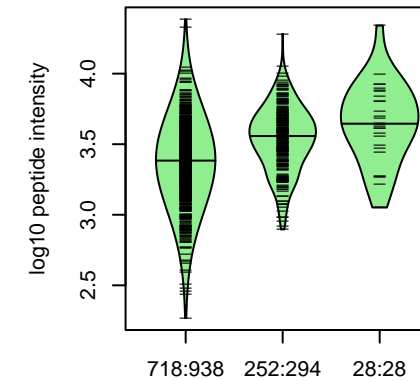

14:88496080:G:T\_T  
 $p = 2.8e-21$ ,  $\beta = 0.562$ ,  $N = 998$

**P54803 NP5**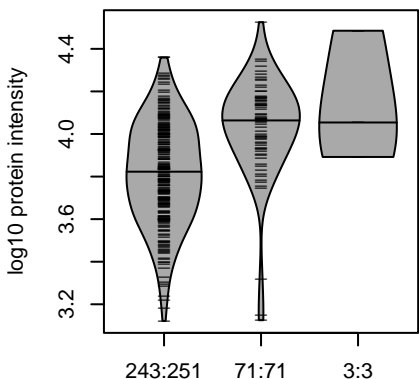

rs12323470  
 $p = 4.3e-13$ ,  $\beta = 0.866$ ,  $N = 317$

**SLWTDIPVNFPK pc2**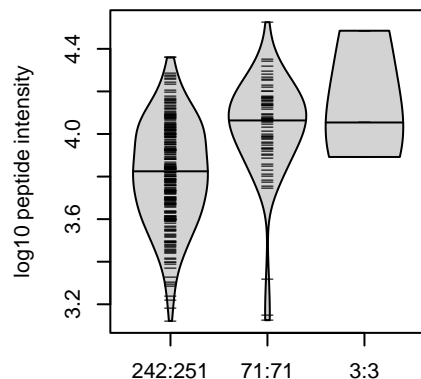

rs12323470  
 $p = 3.2e-13$ ,  $\beta = 0.862$ ,  $N = 316$

**GSFSEIPELQVWYTK pc2**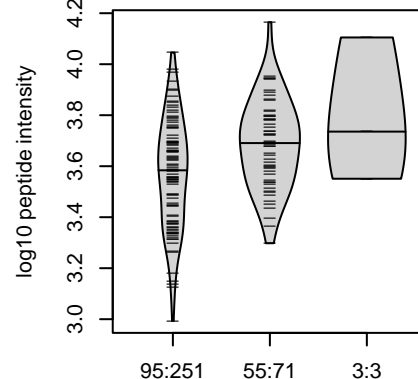

rs12323470  
 $p = 9e-05$ ,  $\beta = 0.573$ ,  $N = 153$

**EFDGIGAVSGGGATSR pc2**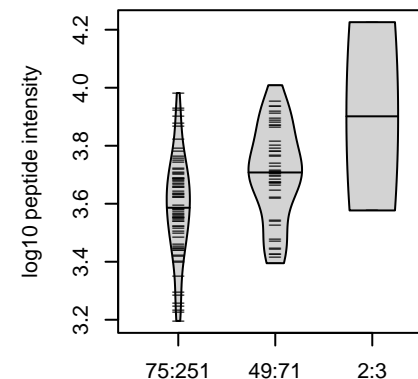

rs12323470  
 $p = 0.0059$ ,  $\beta = 0.449$ ,  $N = 126$

**EIGGDGQTTDGTESHPMHYALDENYF**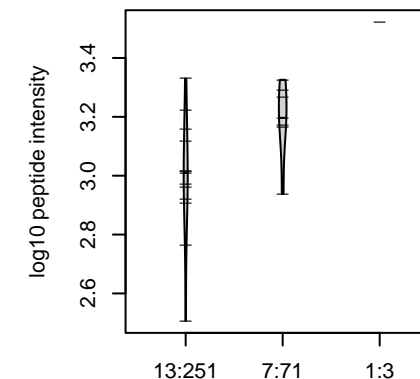

rs12323470  
 $p = 0.0065$ ,  $\beta = 0.86$ ,  $N = 21$

**VVNVIGAHYPGTHSAK pc3  
rs34362748 ALT**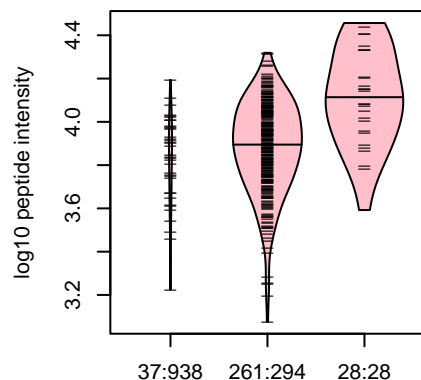

14:88496080:G:T\_T  
 $p = 2.2e-200$ ,  $\text{model} = \text{REC}$ ,  $N = 326$

**VVDVIGAHYPGTHSAK pc3  
rs34362748 REF**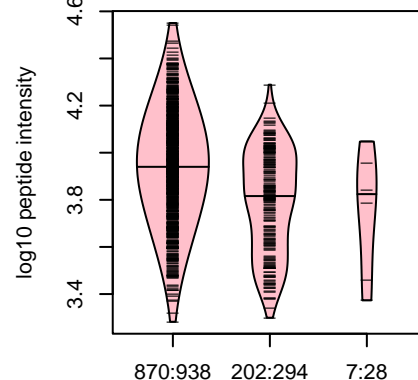

14:88496080:G:T\_T  
 $p = 1.9e-30$ ,  $\text{model} = \text{REC}$ ,  $N = 1079$

Locus: 32 (Sort: 39)  
 Status: Replicated  
 80% power: Yes  
 SNP: 14:88496080:G:T  
 rsID: rs12323470  
 UniProtID: P54803  
 HGNC gene: GALC  
 Type: Cis-pQTL

**LEFTY1 [cis]**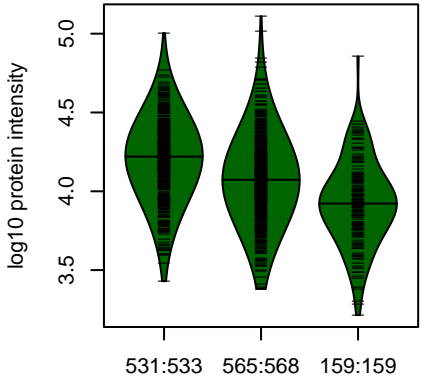

1:226074563:T:G\_G  
 $p = 9.9e-37$ ,  $\beta = -0.507$ ,  $N = 1255$

**QPLLLQSVQR pc2**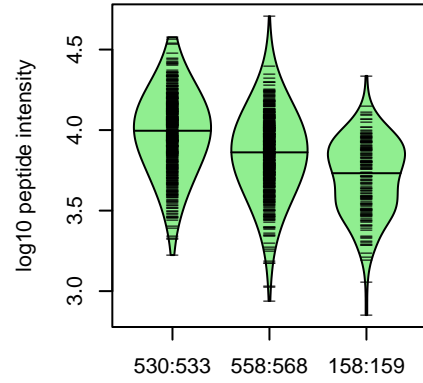

1:226074563:T:G\_G  
 $p = 2.5e-40$ ,  $\beta = -0.532$ ,  $N = 1246$

**AFDVTEAVNFWQQLSRPR pc3**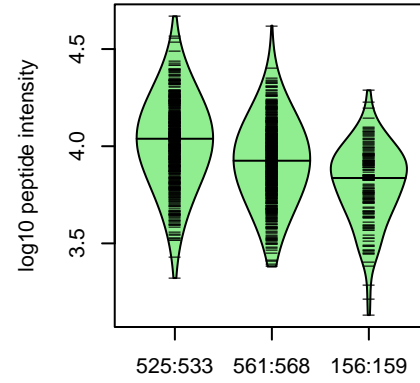

1:226074563:T:G\_G  
 $p = 5.4e-35$ ,  $\beta = -0.499$ ,  $N = 1242$

**EVPTLDRADMEELVIPTHVR pc4**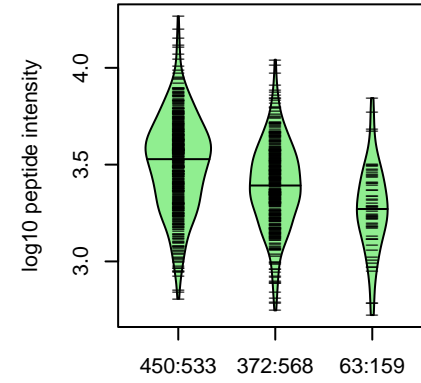

1:226074563:T:G\_G  
 $p = 6.6e-20$ ,  $\beta = -0.479$ ,  $N = 885$

**AQYVALLQR pc2**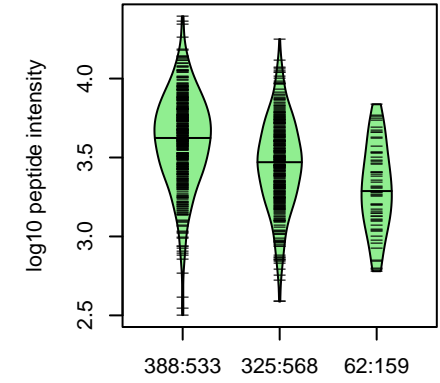

1:226074563:T:G\_G  
 $p = 6.9e-19$ ,  $\beta = -0.486$ ,  $N = 775$

**O75610 NP1**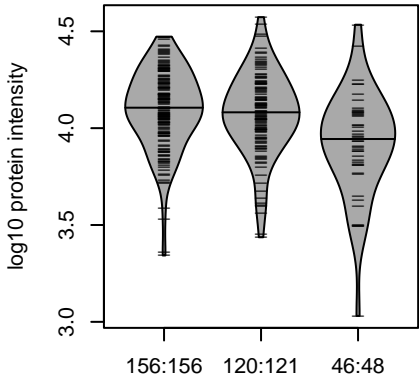

rs360057  
 $p = 6.2e-05$ ,  $\beta = -0.3$ ,  $N = 322$

**AFDVTEAVNFWQQLSRPR pc3**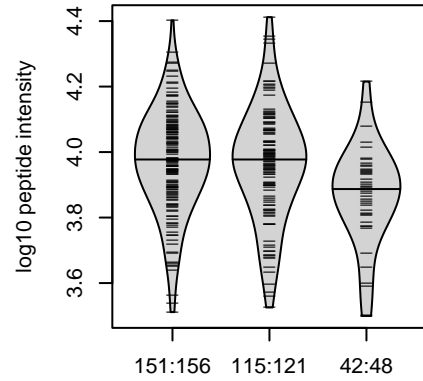

rs360057  
 $p = 0.00029$ ,  $\beta = -0.285$ ,  $N = 308$

**VTVEWLR pc2**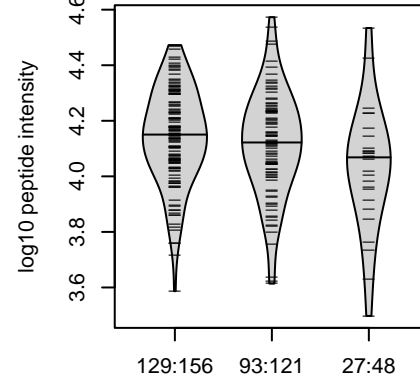

rs360057  
 $p = 0.0028$ ,  $\beta = -0.274$ ,  $N = 249$

**QPLLLQSVQR pc2**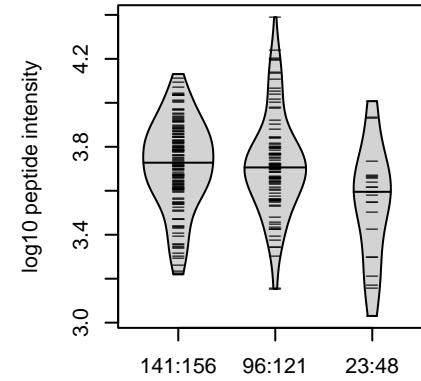

rs360057  
 $p = 0.0081$ ,  $\beta = -0.247$ ,  $N = 260$

**AQYVALLQR pc2**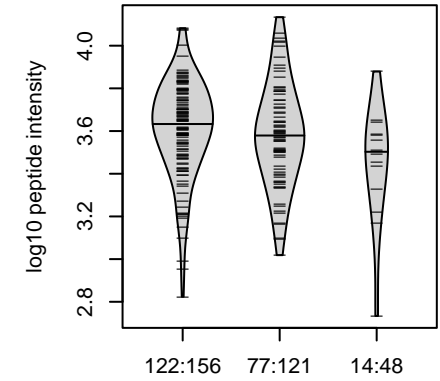

rs360057  
 $p = 0.027$ ,  $\beta = -0.241$ ,  $N = 213$

Locus: 33 (Sort: 40)  
 Status: Replicated  
 80% power: Yes  
 SNP: 1:226074563:T:G  
 rsID: rs360057  
 UniProtID: O75610  
 HGNC gene: LEFTY1  
 Type: Cis-pQTL



**RCN3 [cis]**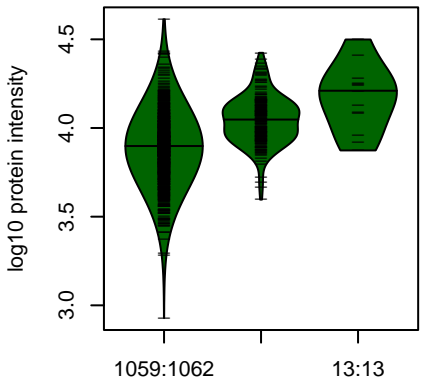

19:50037446:C:G\_G  
 $p = 2.9e-36$ ,  $\beta = 0.858$ ,  $N = 1255$

**AGDGDGWVSLAELR pc2**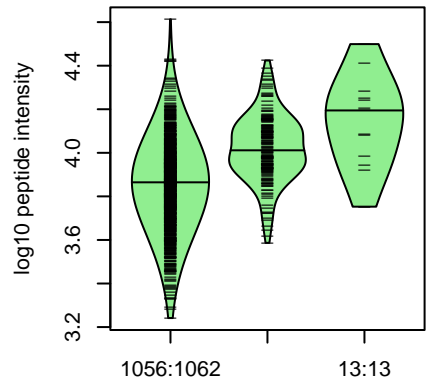

19:50037446:C:G\_G  
 $p = 6.4e-34$ ,  $\beta = 0.83$ ,  $N = 1252$

**VGWEELR pc2**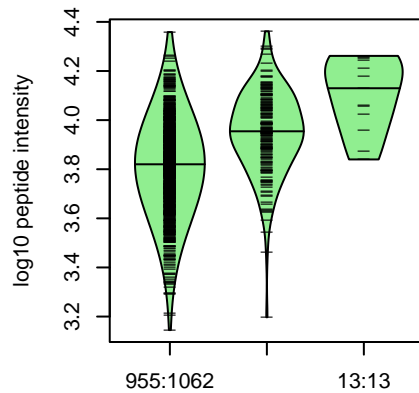

19:50037446:C:G\_G  
 $p = 8.2e-29$ ,  $\beta = 0.778$ ,  $N = 1144$

**DIVAETLELDR pc2**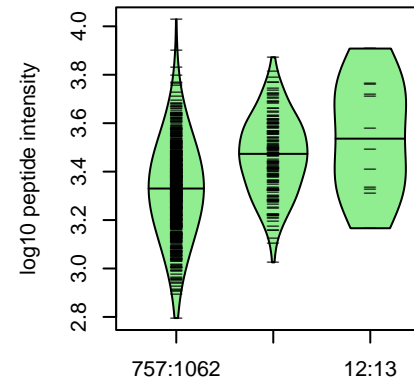

19:50037446:C:G\_G  
 $p = 3.1e-21$ ,  $\beta = 0.698$ ,  $N = 932$

**EELTAFLHPEEFPHMR pc3**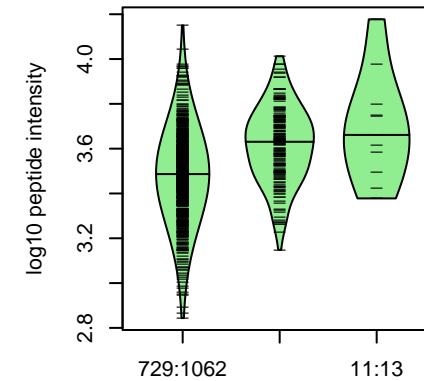

19:50037446:C:G\_G  
 $p = 6.9e-19$ ,  $\beta = 0.664$ ,  $N = 903$

**Q96D15 NP2**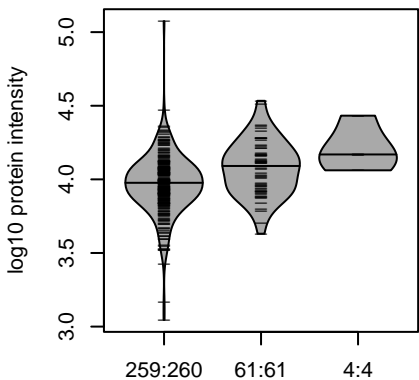

rs73582463  
 $p = 9.5e-06$ ,  $\beta = 0.549$ ,  $N = 324$

**AGDGDGWVSLAELR pc2**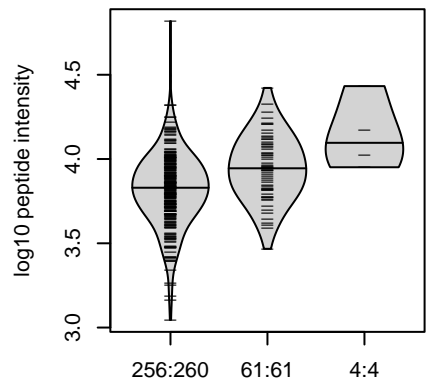

rs73582463  
 $p = 1.3e-06$ ,  $\beta = 0.595$ ,  $N = 321$

**EFDQLTPEESQAR pc2**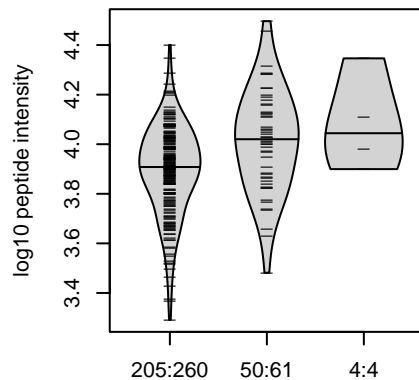

rs73582463  
 $p = 2.6e-05$ ,  $\beta = 0.561$ ,  $N = 259$

**DSVSAAWDTYDTRDGR pc3**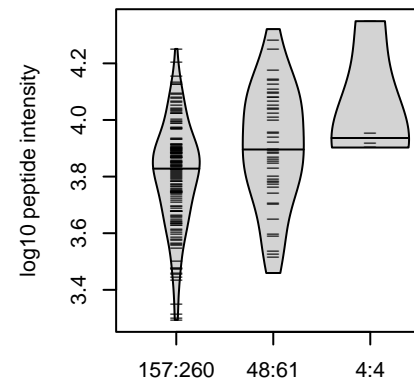

rs73582463  
 $p = 4.7e-05$ ,  $\beta = 0.561$ ,  $N = 209$

**EELTAFLHPEEFPHMR pc4**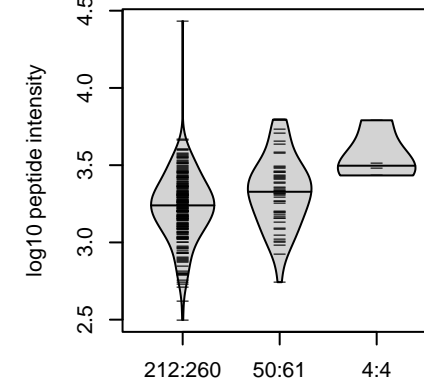

rs73582463  
 $p = 0.00042$ ,  $\beta = 0.471$ ,  $N = 266$

Locus: 34 (Sort: 41)  
 Status: Replicated  
 80% power: Yes  
 SNP: 19:50037446:C:G  
 rsID: rs73582463  
 UniProtID: Q96D15  
 HGNC gene: RCN3  
 Type: Cis-pQTL

**C1QTNF9 [cis]**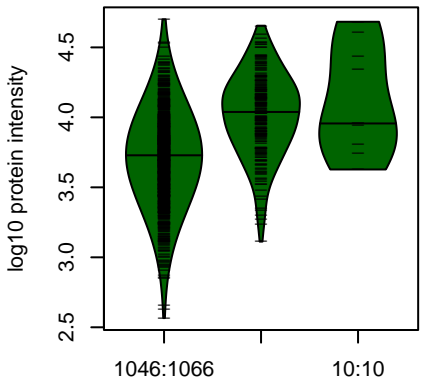

13:24906852:T:C\_C  
 $p = 4.5e-36$ ,  $\beta = 0.877$ ,  $N = 1240$

**ILYNEFNHYDTAAGK pc3**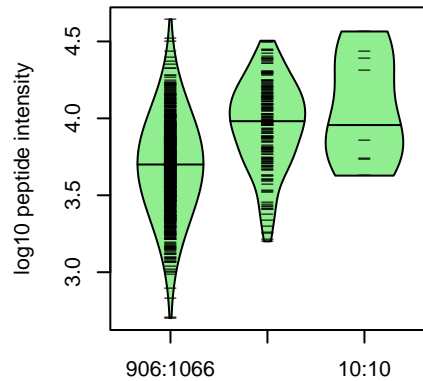

13:24906852:T:C\_C  
 $p = 2.6e-29$ ,  $\beta = 0.804$ ,  $N = 1095$

**IGETLVLPK pc2**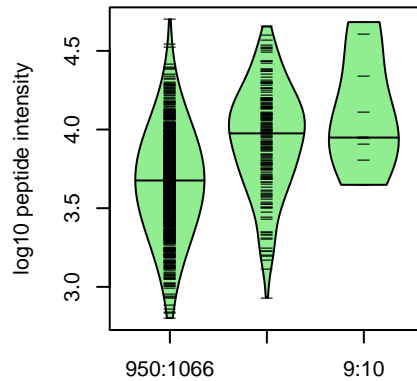

13:24906852:T:C\_C  
 $p = 1.5e-27$ ,  $\beta = 0.783$ ,  $N = 1139$

**SAFTVGLTVLSK pc2**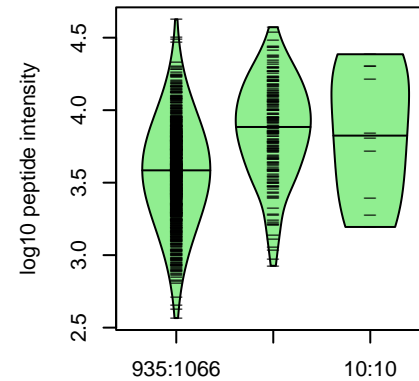

13:24906852:T:C\_C  
 $p = 2.4e-25$ ,  $\beta = 0.747$ ,  $N = 1123$

**LGDEVWLQVTGGER pc2**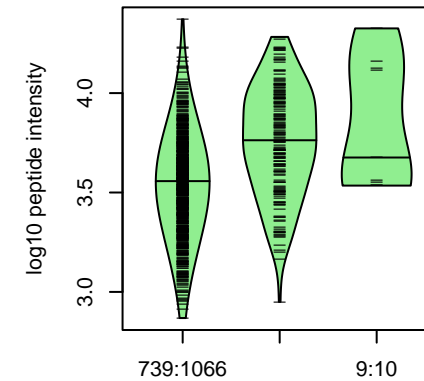

13:24906852:T:C\_C  
 $p = 7.3e-24$ ,  $\beta = 0.748$ ,  $N = 922$

**P0C862 NP4**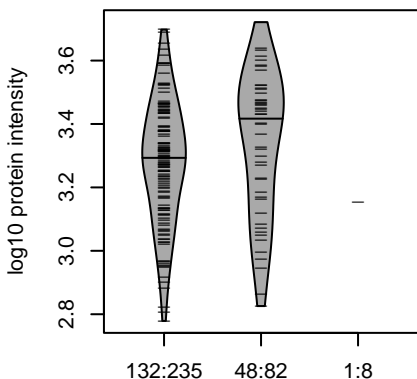

rs1988661  
 $p = 0.23$ ,  $\beta = 0.191$ ,  $N = 181$

**ILYNEFNHYDTAAGK pc3**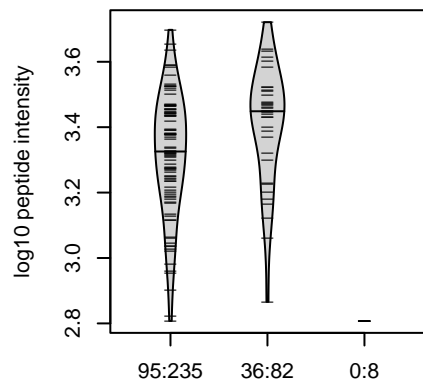

rs1988661  
 $p = 0.005$ ,  $\beta = 0.529$ ,  $N = 131$

**IGETLVLPK pc2**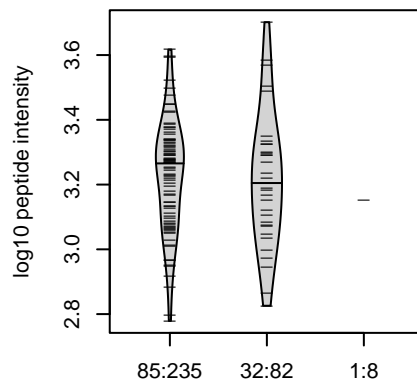

rs1988661  
 $p = 0.38$ ,  $\beta = -0.166$ ,  $N = 118$

**FPSSDMPK pc2  
rs3751357 REF**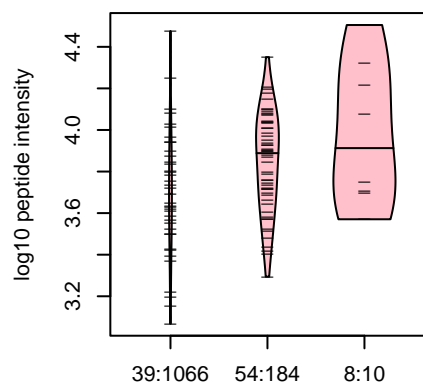

13:24906852:T:C\_C  
 $p = 5.1e-29$ ,  $\text{model} = \text{REC}$ ,  $N = 101$

**FPSSDVPIK pc2  
rs3751357 ALT**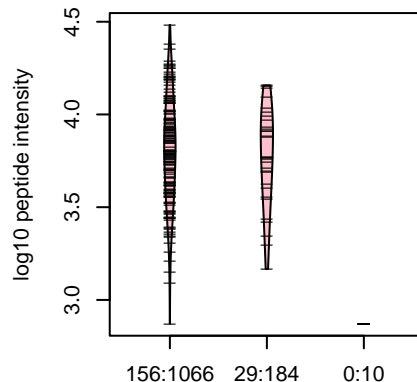

13:24906852:T:C\_C  
 $p = 0.37$ ,  $\text{model} = \text{DOM}$ ,  $N = 185$

Locus: 35 (Sort: 42)  
 Status: Not replicated  
 80% power: Yes  
 SNP: 13:24906852:T:C  
 rsID: rs1988661  
 UniProtID: P0C862  
 HGNC gene: C1QTNF9  
 Type: Cis-pQTL

**RNASE6 [cis]**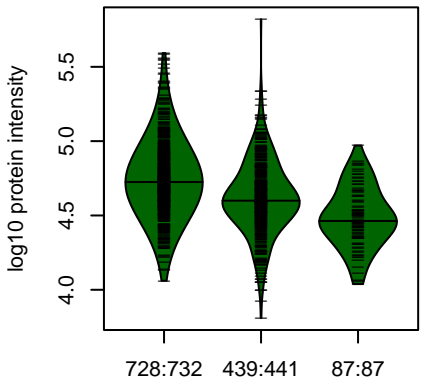

14:21250846:G:T\_T  
 $p = 4.7e-33$ ,  $\beta = -0.525$ ,  $N = 1254$

**YSAAAQYK pc2**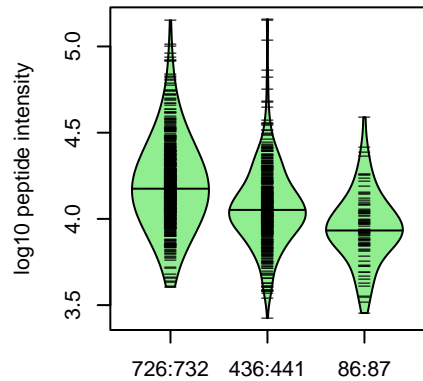

14:21250846:G:T\_T  
 $p = 6.5e-37$ ,  $\beta = -0.557$ ,  $N = 1248$

**FFIVACDPPQK pc2**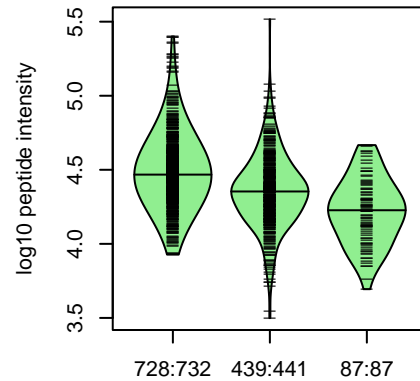

14:21250846:G:T\_T  
 $p = 3.5e-36$ ,  $\beta = -0.549$ ,  $N = 1254$

**LVPVHLDSIL pc2**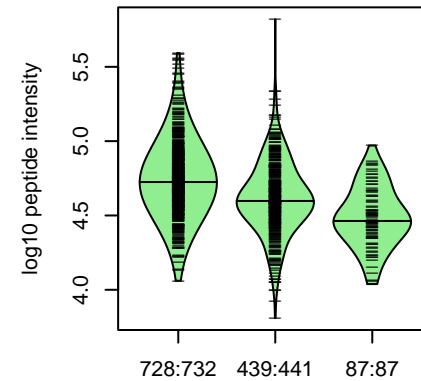

14:21250846:G:T\_T  
 $p = 1.8e-33$ ,  $\beta = -0.529$ ,  $N = 1254$

**HQNTFLHDSFQNVAAVCDLLSIVCK pc2**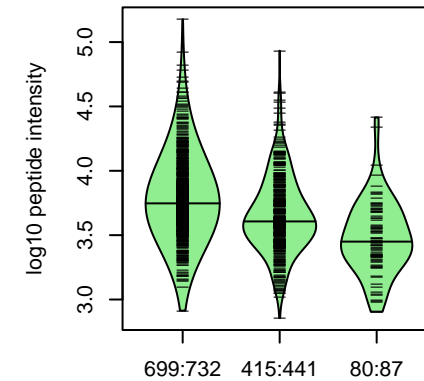

14:21250846:G:T\_T  
 $p = 3.2e-28$ ,  $\beta = -0.5$ ,  $N = 1194$

**Q93091 NP3**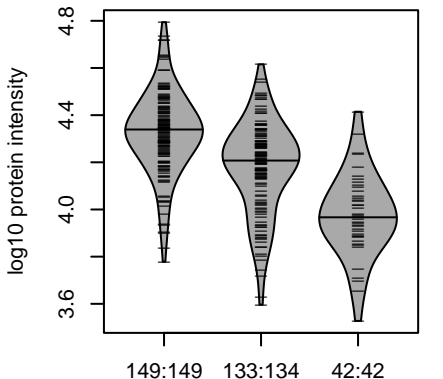

rs11622942  
 $p = 2.5e-17$ ,  $\beta = -0.639$ ,  $N = 324$

**LVPVHLDSIL pc2**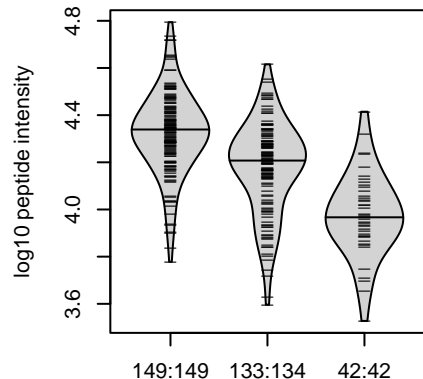

rs11622942  
 $p = 4.8e-17$ ,  $\beta = -0.63$ ,  $N = 324$

**FFIVACDPPQK pc2**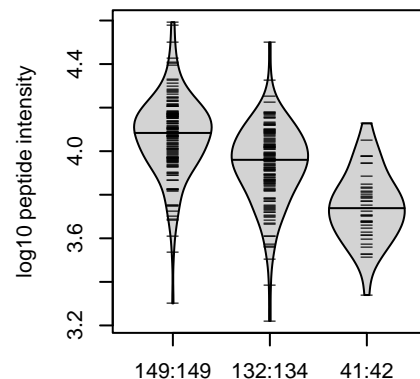

rs11622942  
 $p = 8.6e-16$ ,  $\beta = -0.61$ ,  $N = 322$

**YSAAAQYK pc2**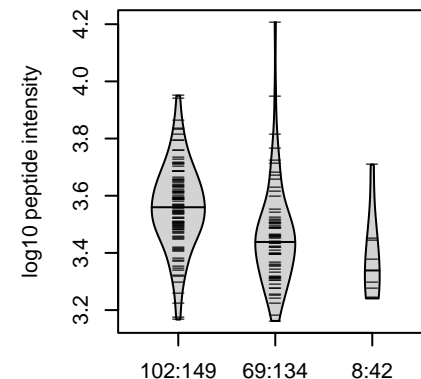

rs11622942  
 $p = 4.7e-06$ ,  $\beta = -0.561$ ,  $N = 179$

**AHWFEIQHIQPSPLQCNR pc4**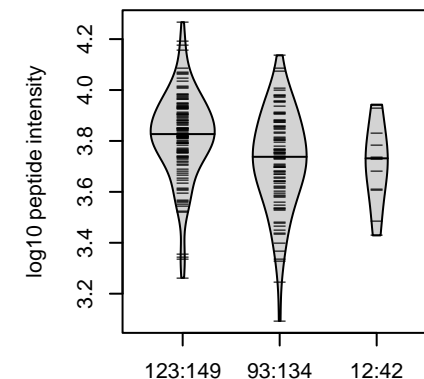

rs11622942  
 $p = 0.00093$ ,  $\beta = -0.358$ ,  $N = 228$

Locus: 36 (Sort: 43)  
 Status: Replicated  
 80% power: Yes  
 SNP: 14:21250846:G:T  
 rsID: rs11622942  
 UniProtID: Q93091  
 HGNC gene: RNASE6  
 Type: Cis-pQTL

**SPON2 [cis]**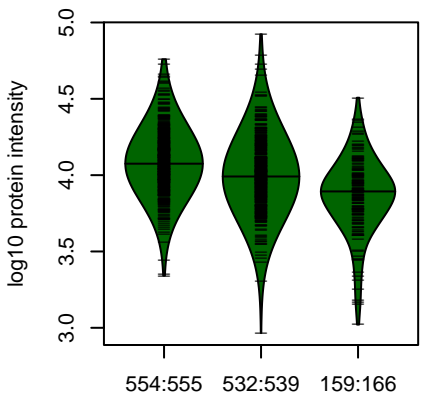

4:1165130:G:T\_G  
 $p = 5.4e-33$ ,  $\beta = -0.478$ ,  $N = 1245$

**HLSVSFVVR pc2**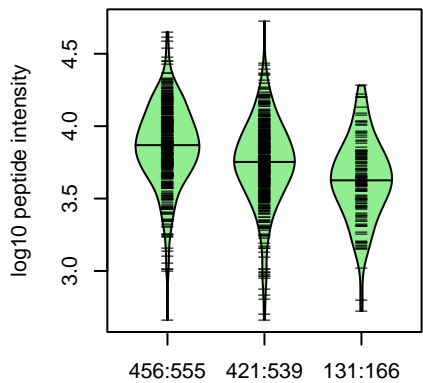

4:1165130:G:T\_G  
 $p = 8.2e-22$ ,  $\beta = -0.425$ ,  $N = 1008$

**NQYVSNGLR pc2**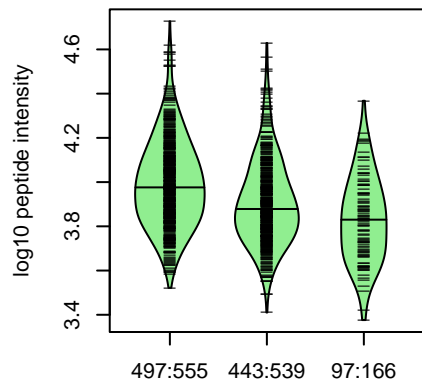

4:1165130:G:T\_G  
 $p = 2e-20$ ,  $\beta = -0.431$ ,  $N = 1037$

**WSQTAFPK pc2**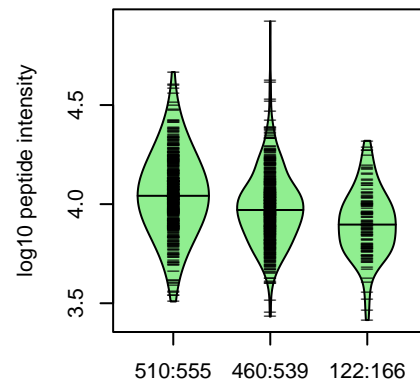

4:1165130:G:T\_G  
 $p = 7.4e-20$ ,  $\beta = -0.401$ ,  $N = 1092$

**GEAWALMK pc2**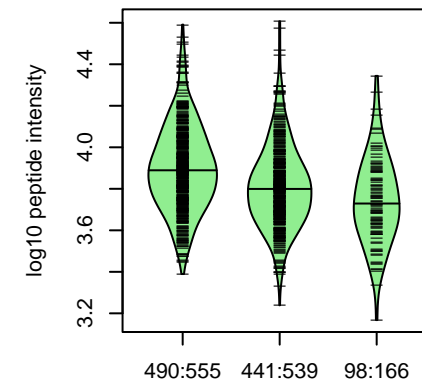

4:1165130:G:T\_G  
 $p = 1e-19$ ,  $\beta = -0.423$ ,  $N = 1029$

**Q9BUD6 NP5**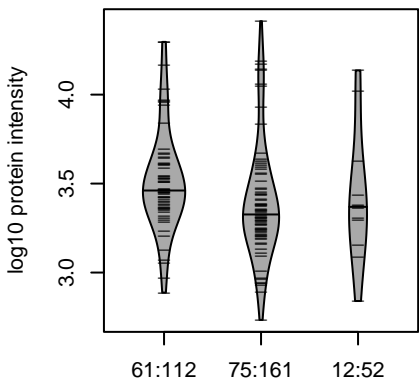

rs11247975  
 $p = 0.0028$ ,  $\beta = -0.387$ ,  $N = 148$

**HLSVSFVVR pc2**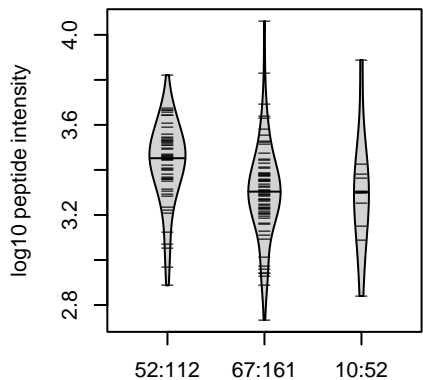

rs11247975  
 $p = 0.00054$ ,  $\beta = -0.475$ ,  $N = 129$

**YSITFTGK pc2**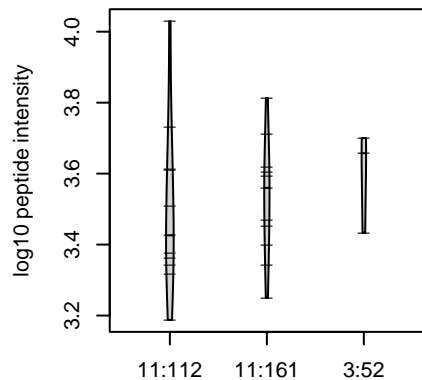

rs11247975  
 $p = 0.58$ ,  $\beta = 0.151$ ,  $N = 25$

Locus: 37 (Sort: 44)  
 Status: Not replicated  
 80% power: No  
 SNP: 4:1165130:G:T  
 rsID: rs11247975  
 UniProtID: Q9BUD6  
 HGNC gene: SPON2  
 Type: Cis-pQTL

**IGHV2-70 [cis]**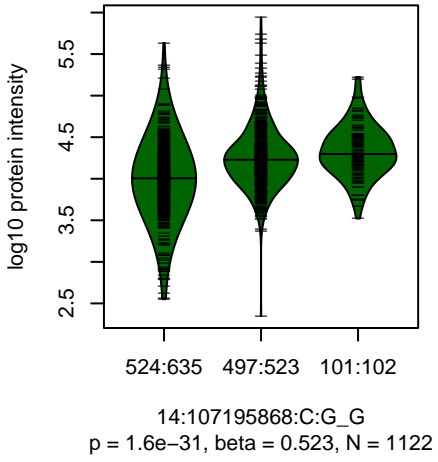**YYTSLK pc2**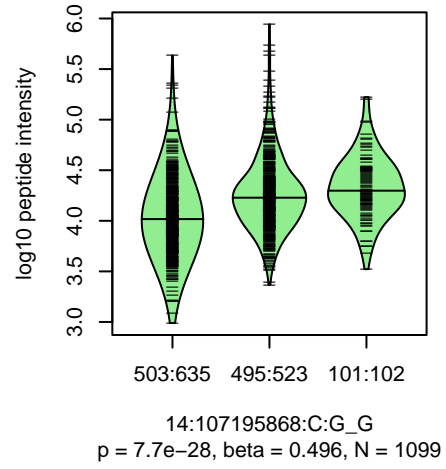**ALEWLALIDWDDDK pc2**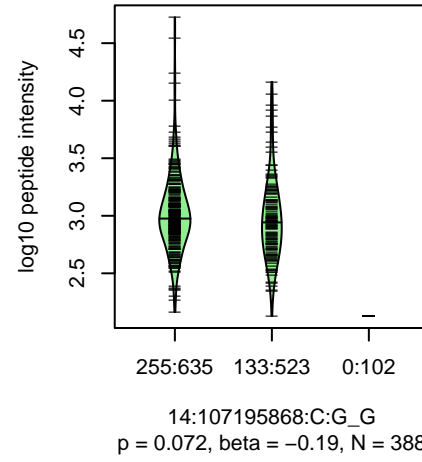**ESGPALVK pc2**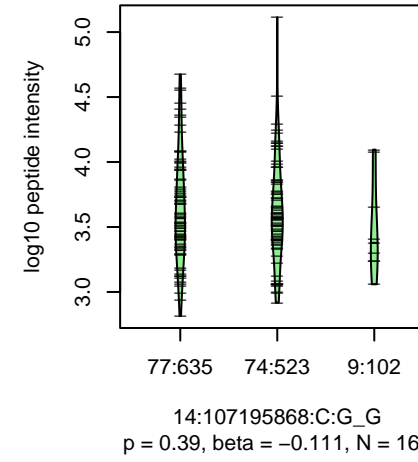**NQVVLMTNMDPVDTATYYCAR pc2**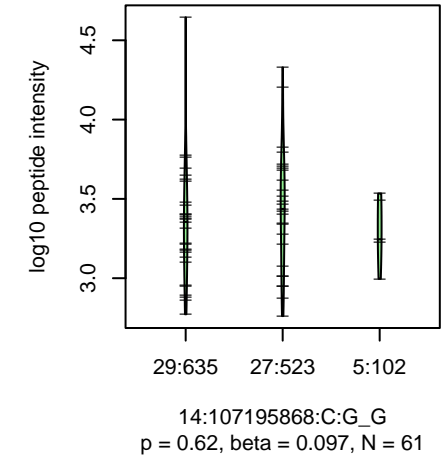**P01814 NP3**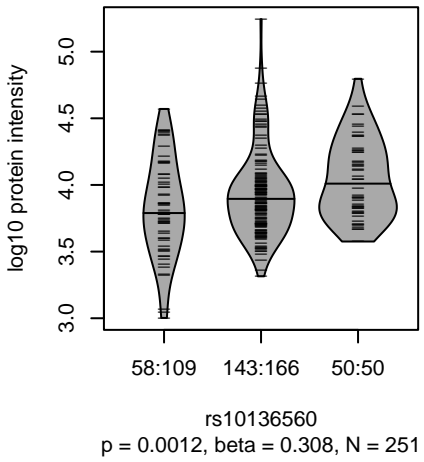**YYTSLK pc2**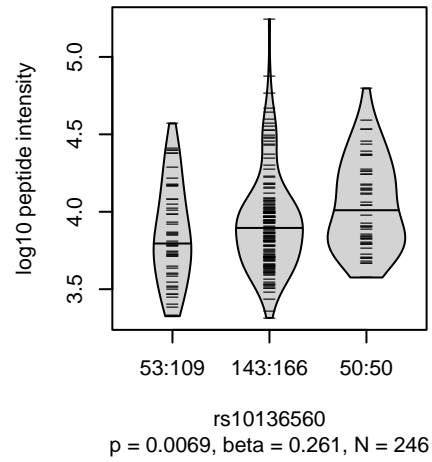**ESGPALVK pc2**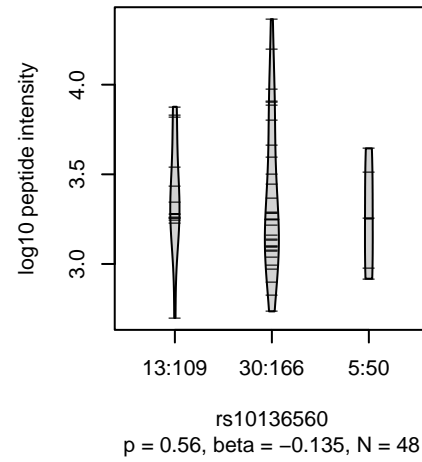**ALEWLALIDWDDDK pc2**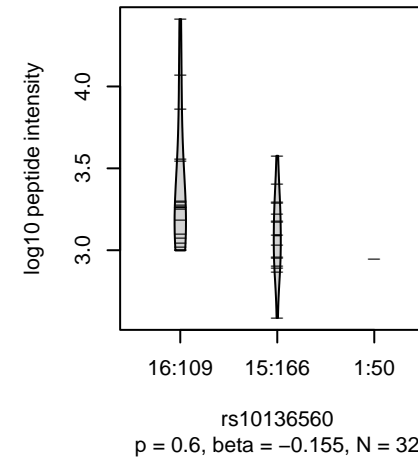

Locus: 38 (Sort: 45)  
 Status: Not replicated  
 80% power: Yes  
 SNP: 14:107195868:C:G  
 rsID: rs10136560  
 UniProtID: P01814  
 HGNC gene: IGHV2-70  
 Type: Cis-pQTL

**IGHV2-70 [cis]**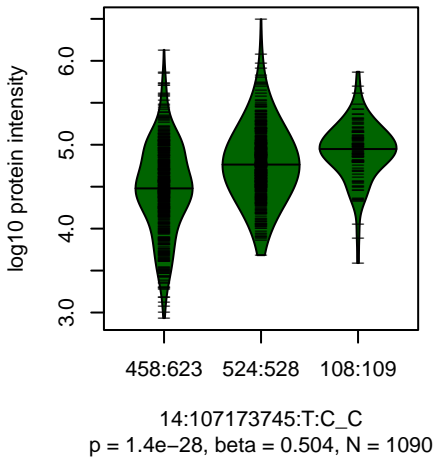**ALEWLAR pc2**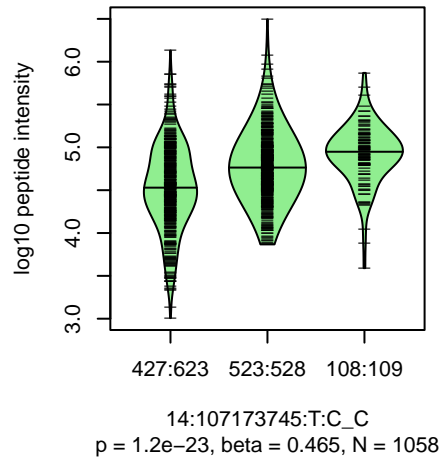**FYSTSLK pc2**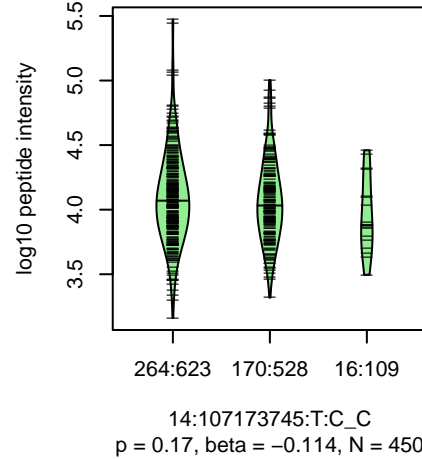**IDWDDDK pc2**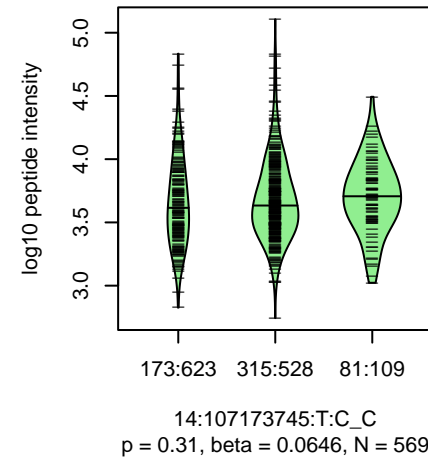**ESGPALVK pc2**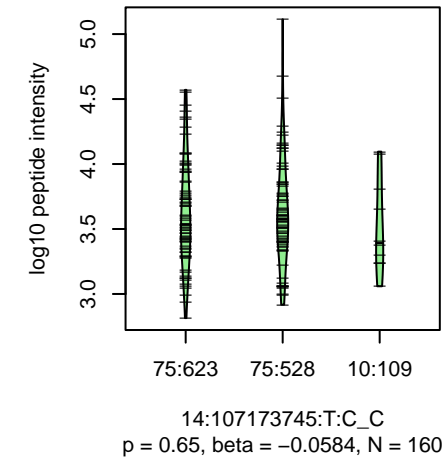**A0A0C4DH43 NP3**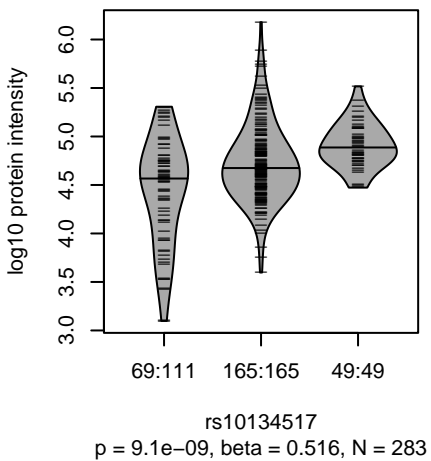**ALEWLAR pc2**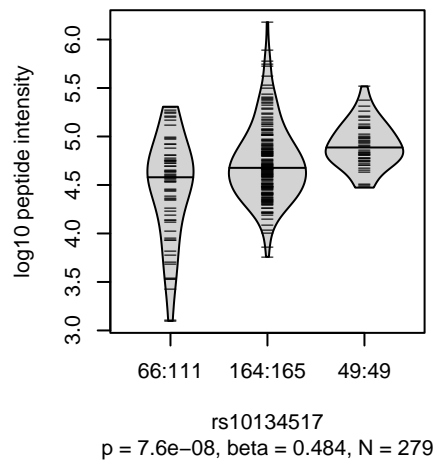**FYSTSLK pc2**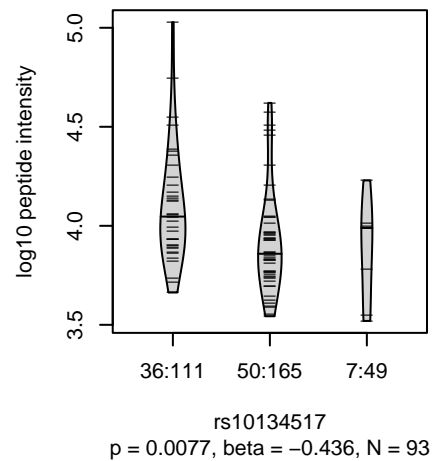**IDWDDDK pc2**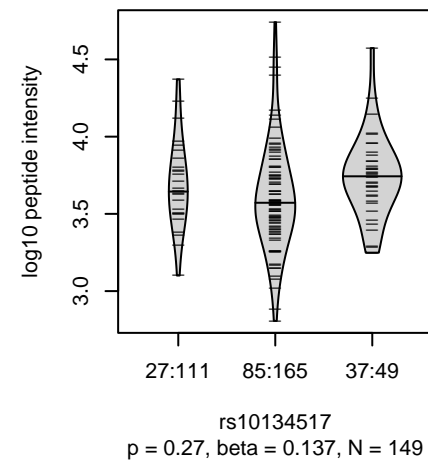**ESGPALVK pc2**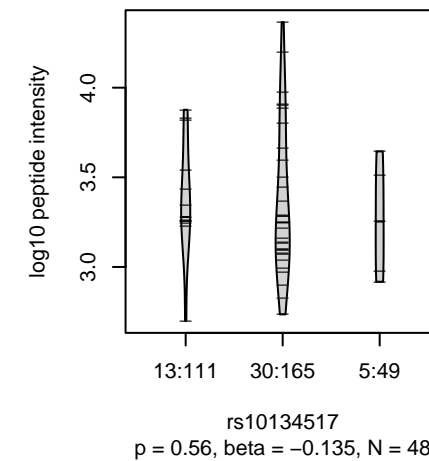

Locus: 38 (Sort: 46)  
 Status: Replicated  
 80% power: Yes  
 SNP: 14:107173745:T:C  
 rsID: rs10134517  
 UniProtID: A0A0C4DH43  
 HGNC gene: IGHV2-70  
 Type: Cis-pQTL

**PEBP4 [cis]**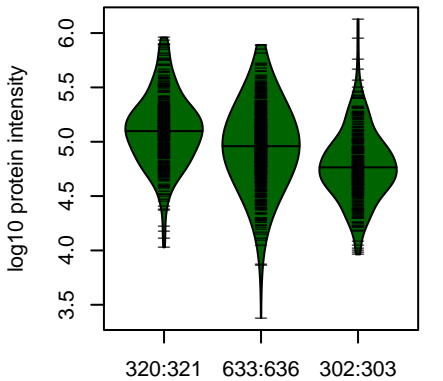

8:22584718:T:C\_C  
 $p = 1.9e-31$ ,  $\beta = -0.454$ ,  $N = 1255$

**ITSWMEPIVK pc2**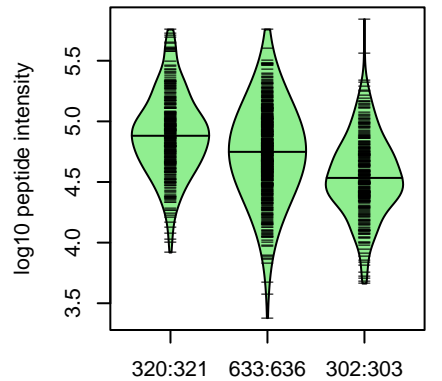

8:22584718:T:C\_C  
 $p = 4e-33$ ,  $\beta = -0.466$ ,  $N = 1255$

**IQGQELSAIQAPSPPAHSGFHR pc**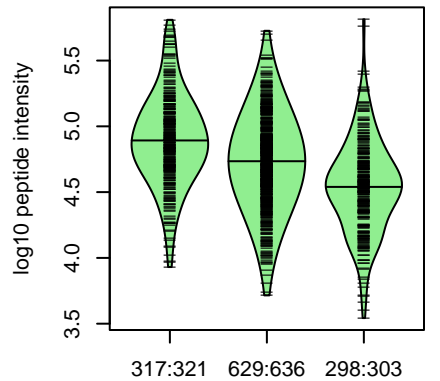

8:22584718:T:C\_C  
 $p = 9.5e-33$ ,  $\beta = -0.465$ ,  $N = 1244$

**YQFFVYLQEGK pc2**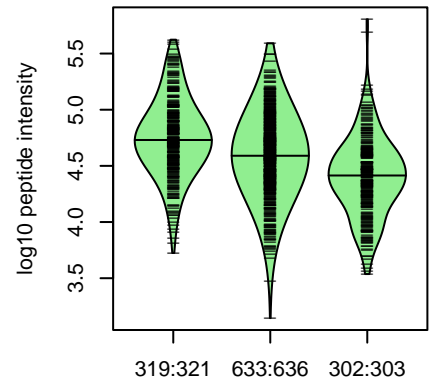

8:22584718:T:C\_C  
 $p = 6.9e-32$ ,  $\beta = -0.457$ ,  $N = 1254$

**VVPDCNNYR pc2**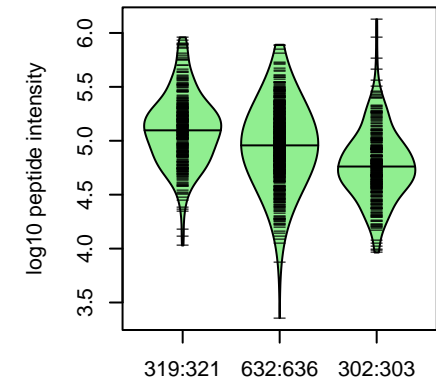

8:22584718:T:C\_C  
 $p = 1.3e-30$ ,  $\beta = -0.448$ ,  $N = 1253$

**Q96S96 NP3**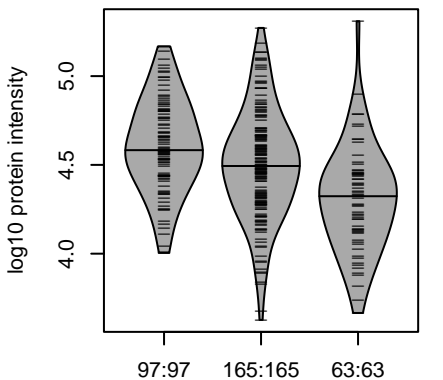

rs1129474  
 $p = 2.6e-12$ ,  $\beta = -0.529$ ,  $N = 325$

**YQFFVYLQEGK pc2**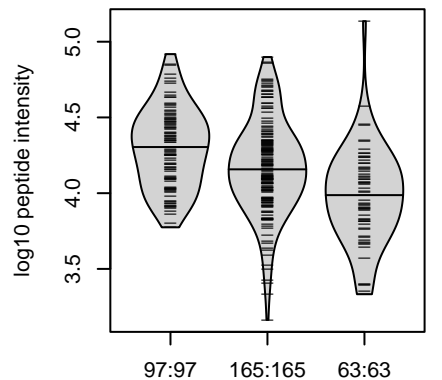

rs1129474  
 $p = 1.4e-12$ ,  $\beta = -0.539$ ,  $N = 325$

**ITSWMEPIVK pc2**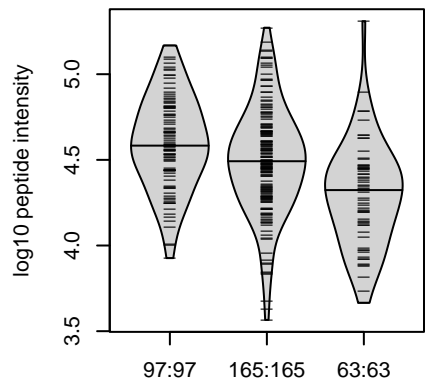

rs1129474  
 $p = 7e-12$ ,  $\beta = -0.523$ ,  $N = 325$

**VVPDCNNYR pc2**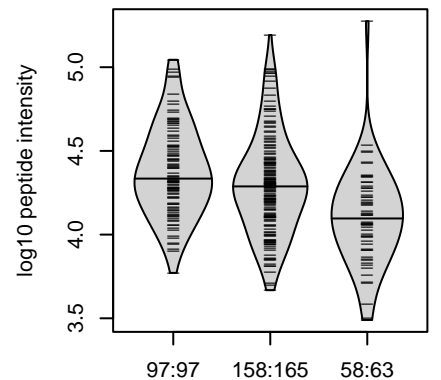

rs1129474  
 $p = 9.2e-11$ ,  $\beta = -0.505$ ,  $N = 313$

**IQGQELSAIQAPSPPAHSGFHR pc**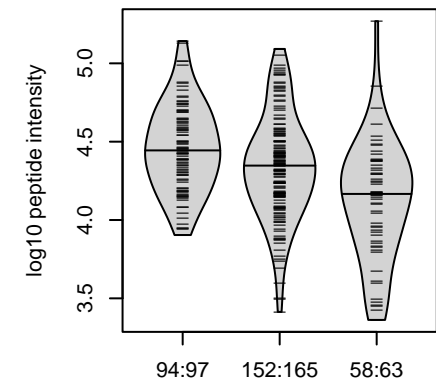

rs1129474  
 $p = 1.7e-10$ ,  $\beta = -0.502$ ,  $N = 304$

Locus: 39 (Sort: 47)  
 Status: Replicated  
 80% power: Yes  
 SNP: 8:22584718:T:C  
 rsID: rs1129474  
 UniProtID: Q96S96  
 HGNC gene: PEBP4  
 Type: Cis-pQTL

**C1QTNF9 [cis]**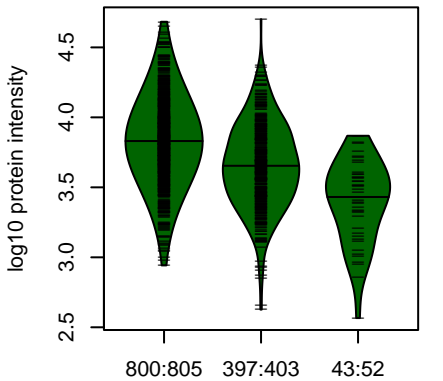

13:24891017:C:A\_C  
 $p = 8.9e-31$ ,  $\beta = -0.573$ ,  $N = 1240$

**IGETLVLPK pc2**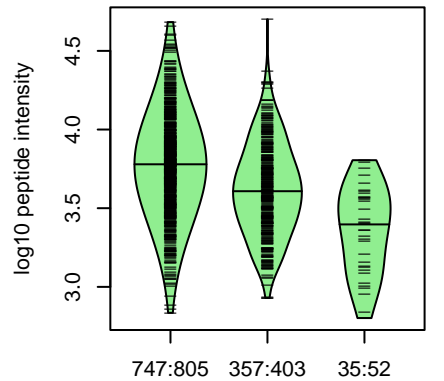

13:24891017:C:A\_C  
 $p = 2.5e-21$ ,  $\beta = -0.504$ ,  $N = 1139$

**ILYNEFNHYDTAAGK pc3**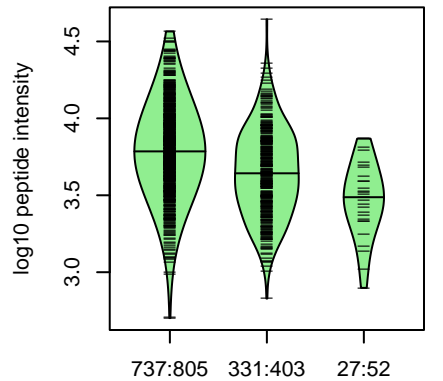

13:24891017:C:A\_C  
 $p = 8.2e-18$ ,  $\beta = -0.483$ ,  $N = 1095$

**SAFTVGLTVLSK pc2**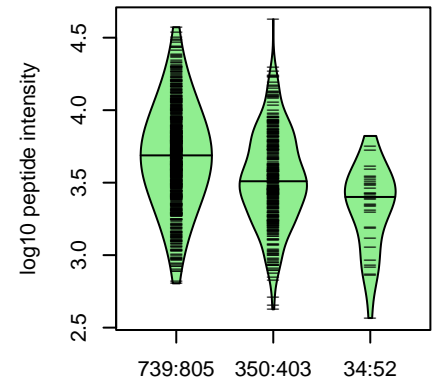

13:24891017:C:A\_C  
 $p = 1e-17$ ,  $\beta = -0.462$ ,  $N = 1123$

**LGDEVWLQVTGGER pc2**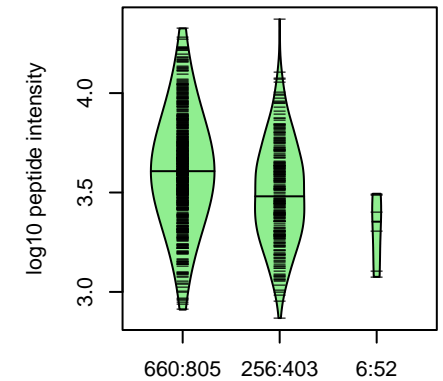

13:24891017:C:A\_C  
 $p = 3.1e-09$ ,  $\beta = -0.411$ ,  $N = 922$

**P0C862 NP4**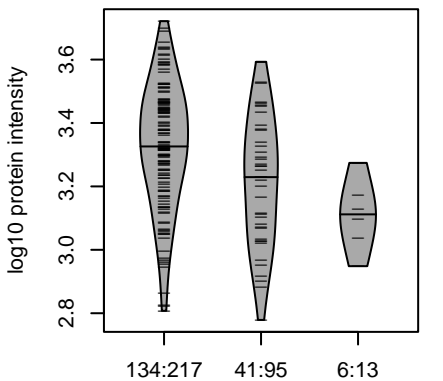

rs1961993  
 $p = 0.0021$ ,  $\beta = -0.425$ ,  $N = 181$

**IGETLVLPK pc2**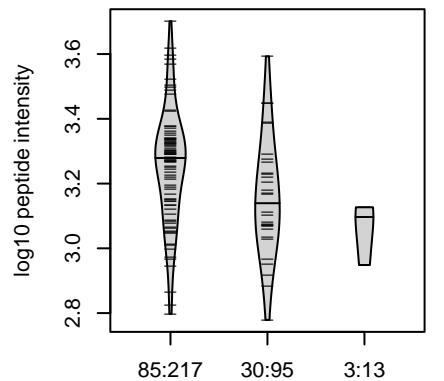

rs1961993  
 $p = 0.02$ ,  $\beta = -0.403$ ,  $N = 118$

**ILYNEFNHYDTAAGK pc3**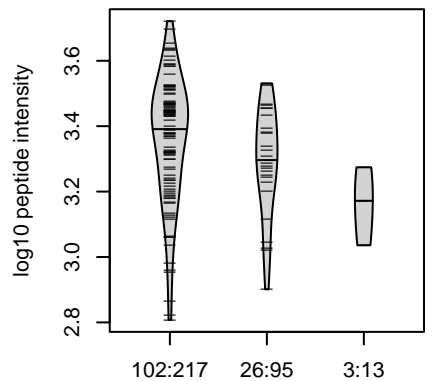

rs1961993  
 $p = 0.075$ ,  $\beta = -0.314$ ,  $N = 131$

**FPSSDVPIK pc2  
rs3751357 ALT**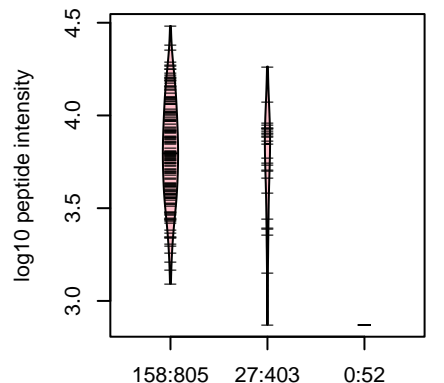

13:24891017:C:A\_C  
 $p = 4.6e-12$ ,  $\text{model} = \text{REC}$ ,  $N = 185$

**FPSSDMPK pc2  
rs3751357 REF**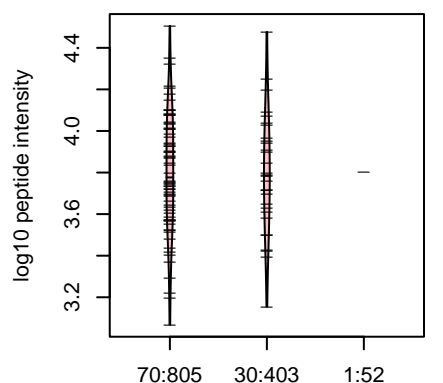

13:24891017:C:A\_C  
 $p = 0.12$ ,  $\text{model} = \text{DOM}$ ,  $N = 101$

Locus: 40 (Sort: 48)  
 Status: Not replicated  
 80% power: No  
 SNP: 13:24891017:C:A  
 rsID: rs1961993  
 UniProtID: P0C862  
 HGNC gene: C1QTNF9  
 Type: Cis-pQTL



**SRL [cis]**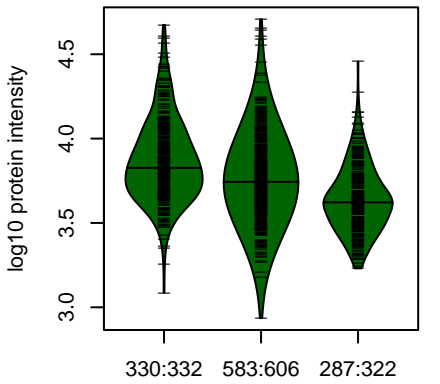

16:4257286:T:C\_T  
 $p = 9.5e-31$ ,  $\beta = -0.45$ ,  $N = 1200$

**ALYADTAPQDK pc2**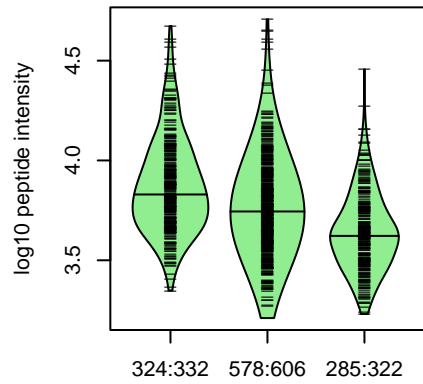

16:4257286:T:C\_T  
 $p = 1.9e-32$ ,  $\beta = -0.465$ ,  $N = 1187$

**LLLHYPDGR pc2**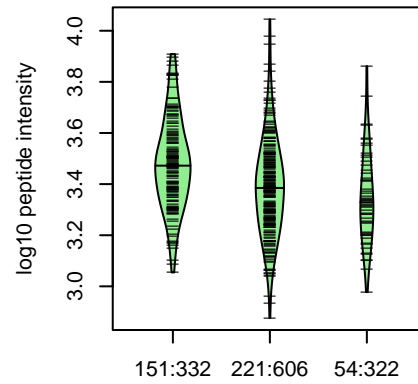

16:4257286:T:C\_T  
 $p = 3.3e-07$ ,  $\beta = -0.368$ ,  $N = 426$

**I3L4D6 NP2**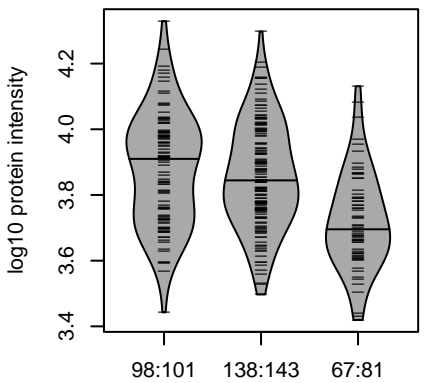

rs9924822  
 $p = 6.2e-07$ ,  $\beta = -0.377$ ,  $N = 303$

**ALYADTAPQDK pc2**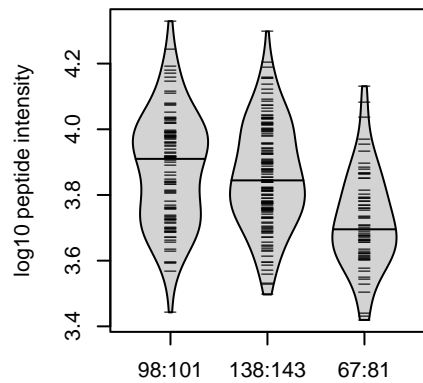

rs9924822  
 $p = 5.2e-07$ ,  $\beta = -0.382$ ,  $N = 303$

**LLLHYPDGR pc2**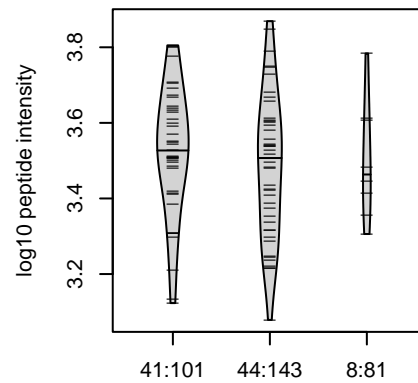

rs9924822  
 $p = 0.56$ ,  $\beta = -0.0919$ ,  $N = 93$

Locus: 41 (Sort: 49)  
 Status: Replicated  
 80% power: Yes  
 SNP: 16:4257286:T:C  
 rsID: rs9924822  
 UniProtID: I3L4D6  
 HGNC gene: SRL  
 Type: Cis-pQTL

**HLA-C [cis]**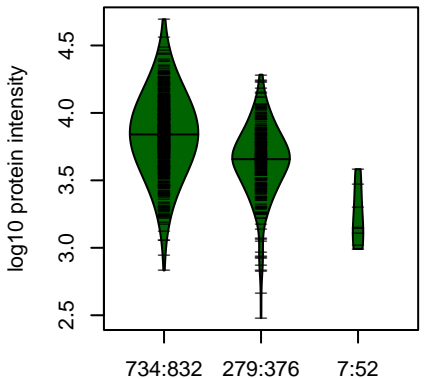

6:31323468:G:T\_T  
 $p = 1.2e-30$ ,  $\beta = -0.743$ ,  $N = 1020$

**THVTHHPLSDHEATLR pc4**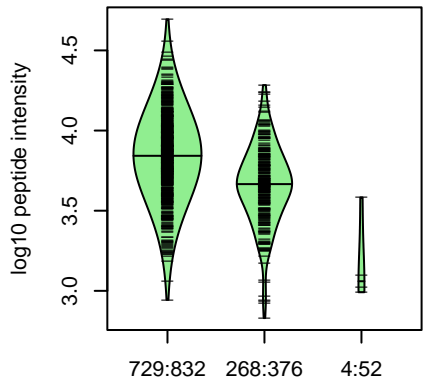

6:31323468:G:T\_T  
 $p = 1.4e-26$ ,  $\beta = -0.716$ ,  $N = 1001$

**SWTAADTAAQITQR pc2**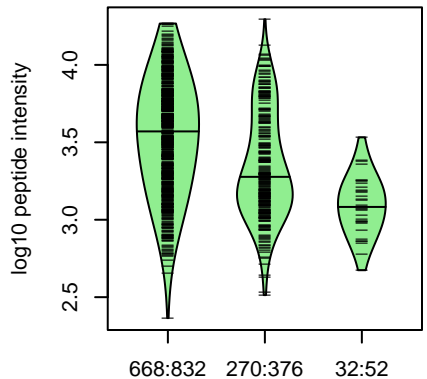

6:31323468:G:T\_T  
 $p = 1.6e-12$ ,  $\beta = -0.413$ ,  $N = 970$

**FDSAASPR pc2**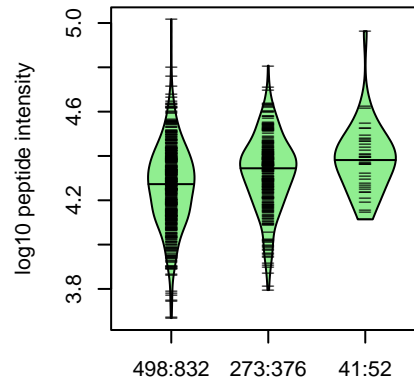

6:31323468:G:T\_T  
 $p = 3e-05$ ,  $\beta = 0.246$ ,  $N = 812$

**DYIALNEDLR pc2**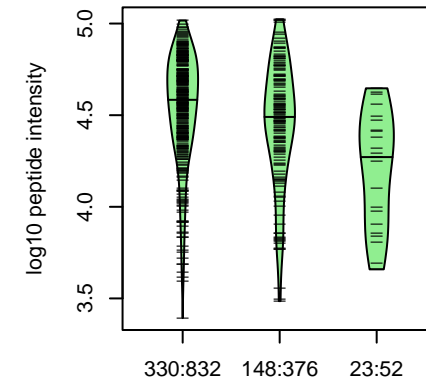

6:31323468:G:T\_T  
 $p = 0.0032$ ,  $\beta = -0.227$ ,  $N = 501$

**P10321 NP1**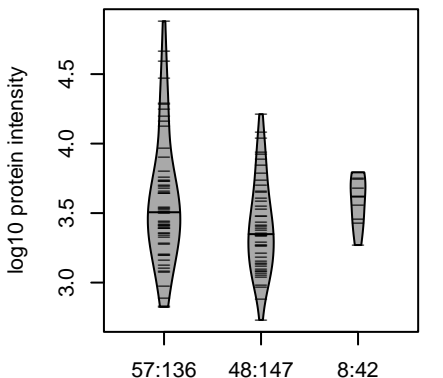

rs3897530  
 $p = 0.72$ ,  $\beta = -0.0525$ ,  $N = 113$

**SWTAADTAAQITQR pc2**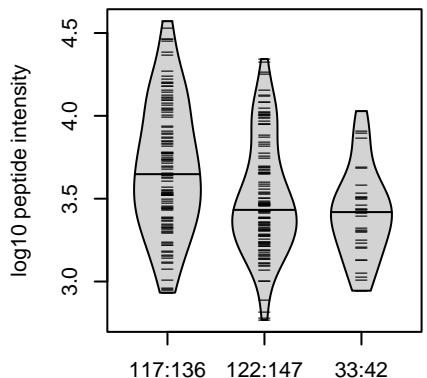

rs3897530  
 $p = 3e-05$ ,  $\beta = -0.364$ ,  $N = 272$

**THVTHHPLSDHEATLR pc4**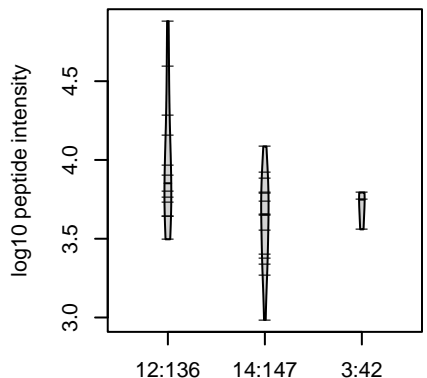

rs3897530  
 $p = 0.052$ ,  $\beta = -0.504$ ,  $N = 29$

**DYIALNEDLR pc2**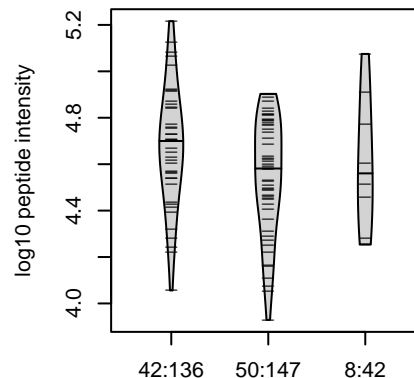

rs3897530  
 $p = 0.061$ ,  $\beta = -0.292$ ,  $N = 100$

**FDSAASPR pc2**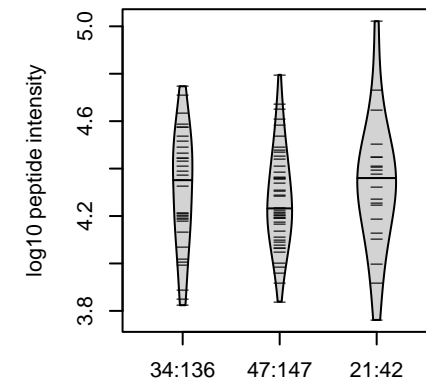

rs3897530  
 $p = 0.56$ ,  $\beta = 0.0769$ ,  $N = 102$

Locus: 42 (Sort: 50)  
 Status: Not replicated  
 80% power: No  
 SNP: 6:31323468:G:T  
 rsID: rs3897530  
 UniProtID: P10321  
 HGNC gene: HLA-C  
 Type: Cis-pQTL

**WAAVVVPSGQEQR pc2  
rs707908 REF**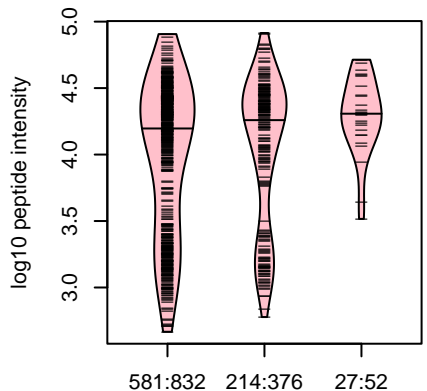

6:31323468:G:T\_T  
 $p = 2.6e-06$ , model = REC,  $N = 822$

**AYLEGCVEWLR pc2  
rs1050686 REF**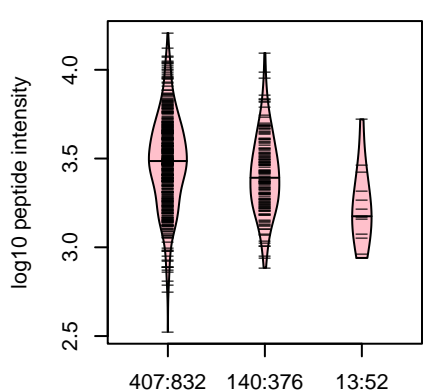

6:31323468:G:T\_T  
 $p = 9.1e-06$ , model = REC,  $N = 560$

**FISVGYVDDTQFVR pc2  
rs1050437 REF**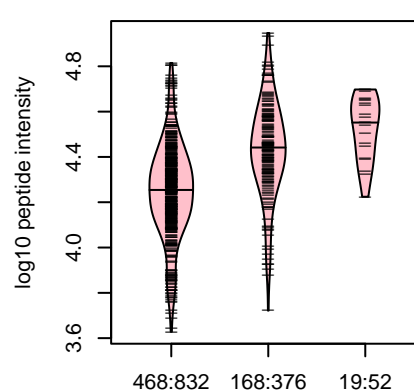

6:31323468:G:T\_T  
 $p = 3e-05$ , model = REC,  $N = 655$

**AYLEGCVEWLR pc3  
rs1050686 REF**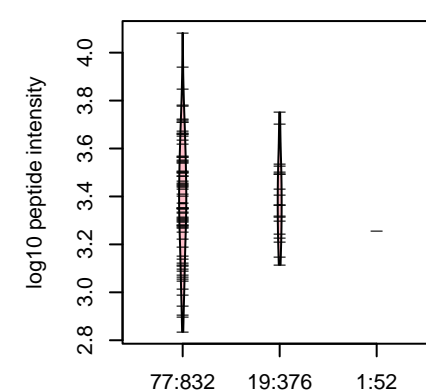

6:31323468:G:T\_T  
 $p = 0.0036$ , model = REC,  $N = 97$

**FGL1 [cis]**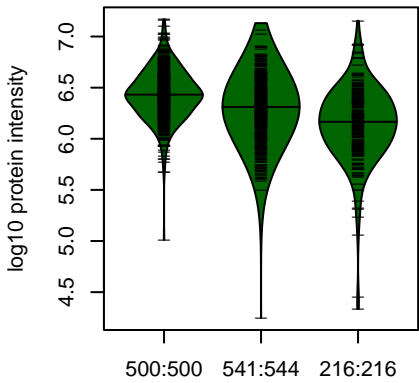

8:17722867:G:C\_G  
 $p = 8.5e-30$ ,  $\beta = -0.431$ ,  $N = 1257$

**HGEYWLGNK pc2**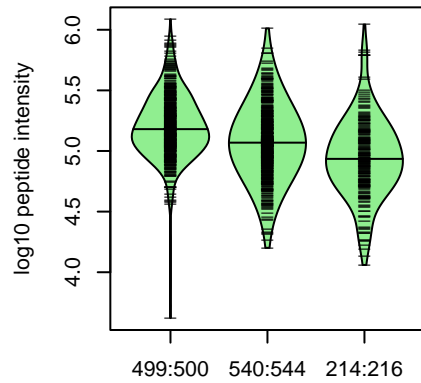

8:17722867:G:C\_G  
 $p = 7.9e-30$ ,  $\beta = -0.433$ ,  $N = 1253$

**IRPNDFIPNVI pc2**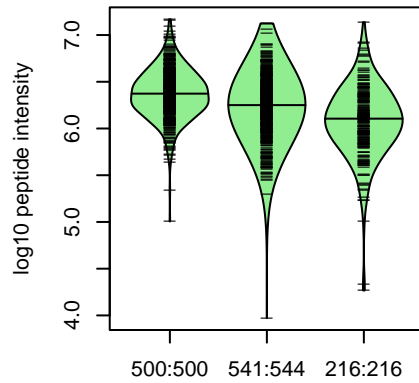

8:17722867:G:C\_G  
 $p = 8.4e-28$ ,  $\beta = -0.416$ ,  $N = 1257$

**NLHFLTQEDYTLK pc2**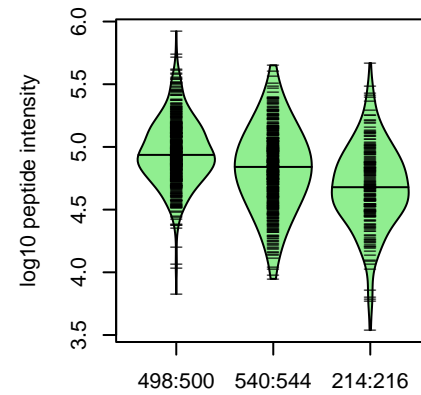

8:17722867:G:C\_G  
 $p = 1.3e-27$ ,  $\beta = -0.416$ ,  $N = 1252$

**SDGSENFNR pc2**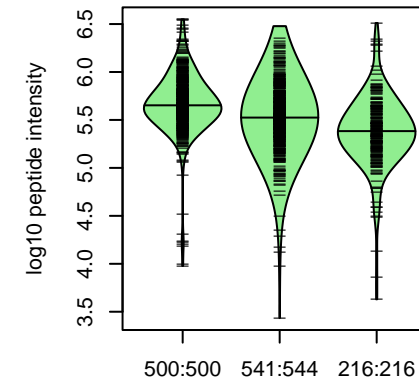

8:17722867:G:C\_G  
 $p = 1.6e-27$ ,  $\beta = -0.414$ ,  $N = 1257$

**Q08830 NP5**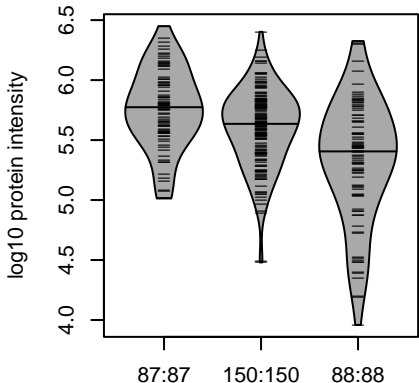

rs7818801  
 $p = 5.6e-10$ ,  $\beta = -0.449$ ,  $N = 325$

**QLLQENEVQFLDK pc2**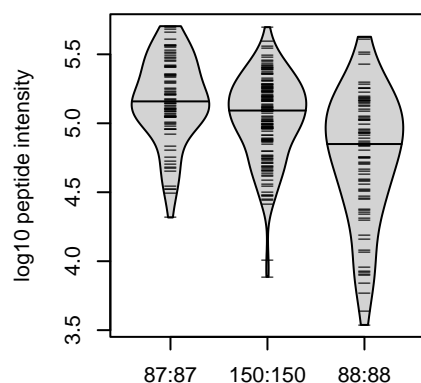

rs7818801  
 $p = 8.2e-11$ ,  $\beta = -0.47$ ,  $N = 325$

**NLHFLTQEDYTLK pc2**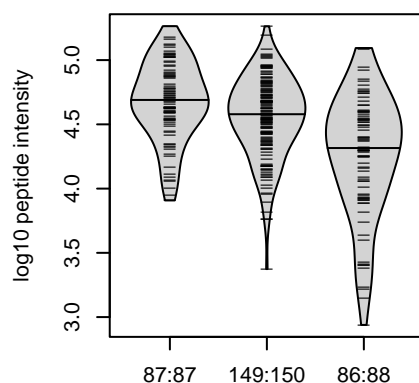

rs7818801  
 $p = 8.9e-11$ ,  $\beta = -0.472$ ,  $N = 322$

**SDGSENFNR pc2**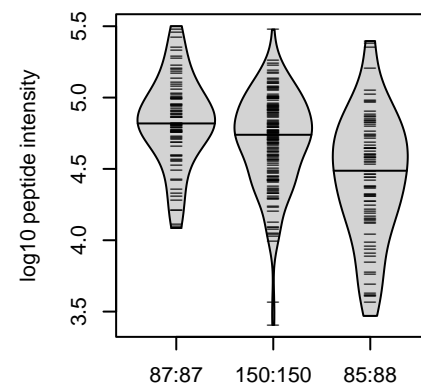

rs7818801  
 $p = 5.2e-10$ ,  $\beta = -0.454$ ,  $N = 322$

**IRPNDFIPNVI pc2**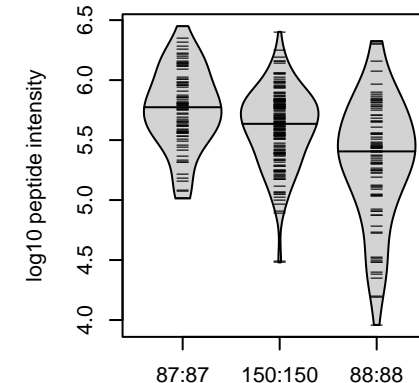

rs7818801  
 $p = 5.8e-10$ ,  $\beta = -0.449$ ,  $N = 325$

**GDENTVIDLGSK pc2  
rs3739406 REF**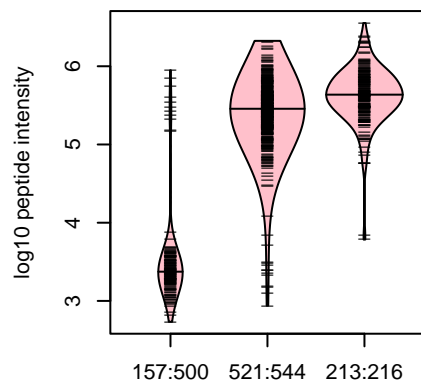

8:17722867:G:C\_G  
 $p = 3.4e-148$ ,  $\text{model} = \text{REC}$ ,  $N = 891$

**GDENTVVDLGSK pc2  
rs3739406 ALT**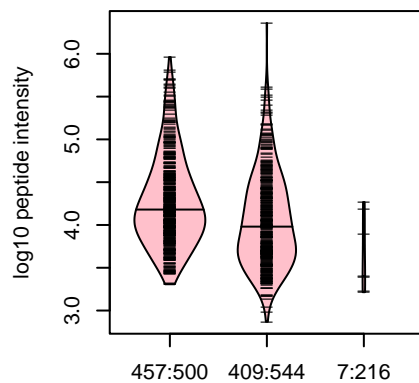

8:17722867:G:C\_G  
 $p = 1.9e-118$ ,  $\text{model} = \text{DOM}$ ,  $N = 873$

**GDENTVIDLGSKR pc2  
rs3739406 REF**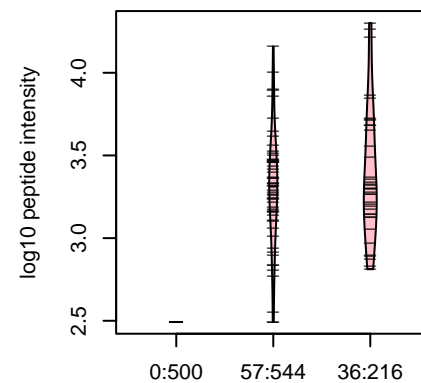

8:17722867:G:C\_G  
 $p = 4.5e-22$ ,  $\text{model} = \text{REC}$ ,  $N = 93$

**GDENTVVDLGSKR pc2  
rs3739406 ALT**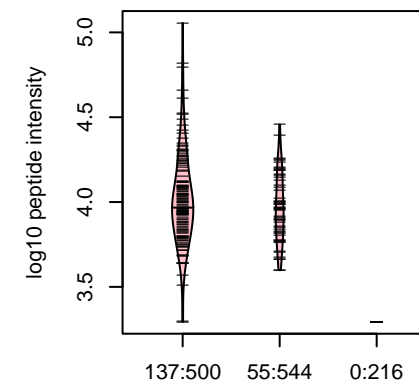

8:17722867:G:C\_G  
 $p = 7.3e-22$ ,  $\text{model} = \text{REC}$ ,  $N = 192$

Locus: 43 (Sort: 51)  
 Status: Replicated  
 80% power: Yes  
 SNP: 8:17722867:G:C  
 rsID: rs7818801  
 UniProtID: Q08830  
 HGNC gene: FGL1  
 Type: Cis-pQTL

**PLA2G2A [cis]**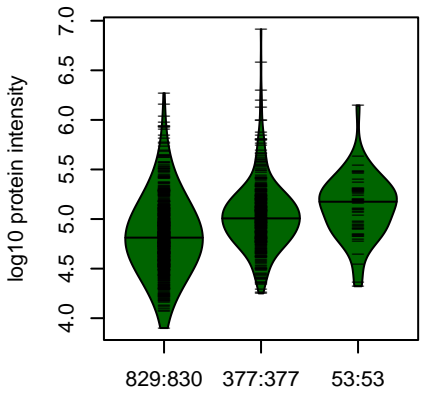

1:20304857:G:A\_A  
 $p = 1.5e-29$ ,  $\beta = 0.546$ ,  $N = 1259$

**CCVTHDCCYK pc3**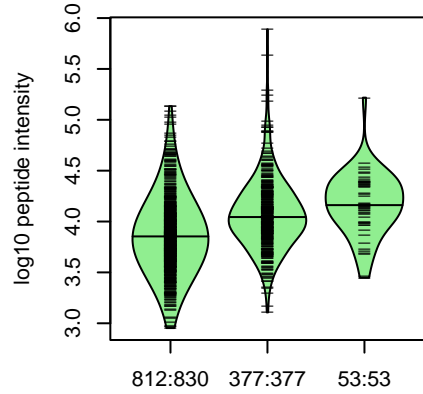

1:20304857:G:A\_A  
 $p = 7.1e-31$ ,  $\beta = 0.559$ ,  $N = 1242$

**SQLCECDK pc2**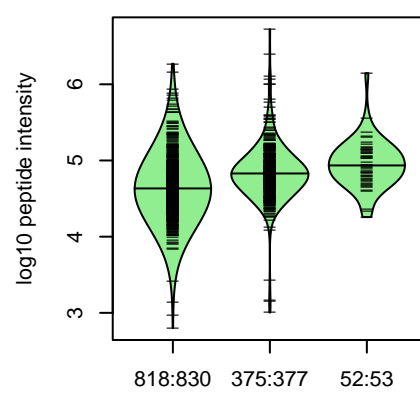

1:20304857:G:A\_A  
 $p = 1.1e-30$ ,  $\beta = 0.559$ ,  $N = 1245$

**AAATCFAR pc2**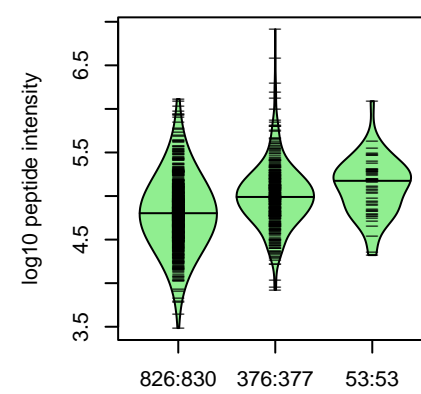

1:20304857:G:A\_A  
 $p = 8.9e-26$ ,  $\beta = 0.51$ ,  $N = 1255$

**YQYYSNK pc2**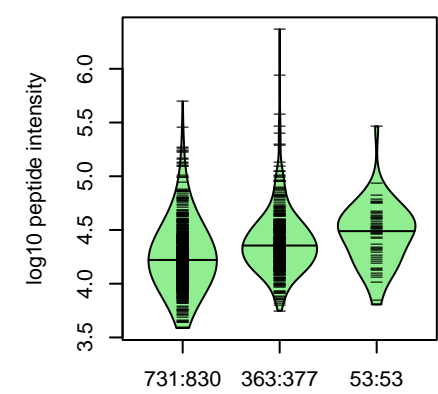

1:20304857:G:A\_A  
 $p = 3.3e-21$ ,  $\beta = 0.472$ ,  $N = 1147$

**P14555 NP4**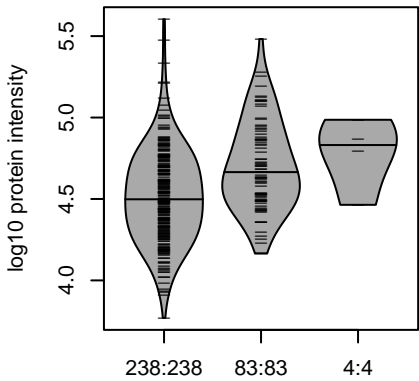

rs2307246  
 $p = 1.3e-08$ ,  $\beta = 0.634$ ,  $N = 325$

**SQLCECDK pc2**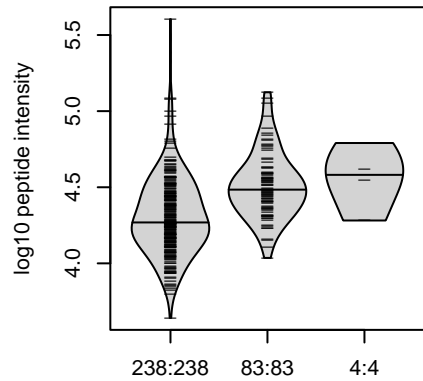

rs2307246  
 $p = 1.4e-13$ ,  $\beta = 0.818$ ,  $N = 325$

**CCVTHDCCYK pc2**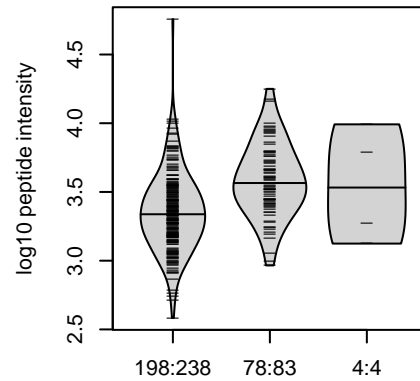

rs2307246  
 $p = 1.5e-10$ ,  $\beta = 0.742$ ,  $N = 280$

**EAALSYGFYGCHCGVGGR pc3**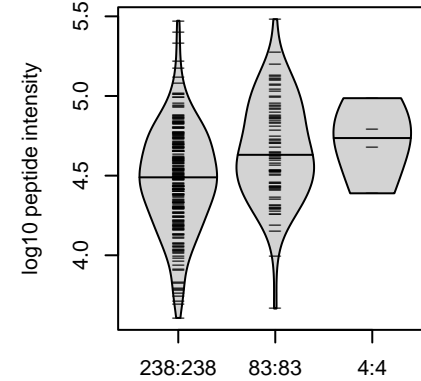

rs2307246  
 $p = 5.2e-06$ ,  $\beta = 0.517$ ,  $N = 325$

**AAATCFAR pc2**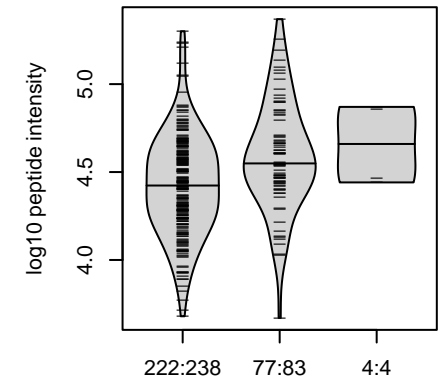

rs2307246  
 $p = 1.3e-05$ ,  $\beta = 0.51$ ,  $N = 303$

Locus: 44 (Sort: 52)  
 Status: Replicated  
 80% power: Yes  
 SNP: 1:20304857:G:A  
 rsID: rs2307246  
 UniProtID: P14555  
 HGNC gene: PLA2G2A  
 Type: Cis-pQTL

**COL15A1 [cis]**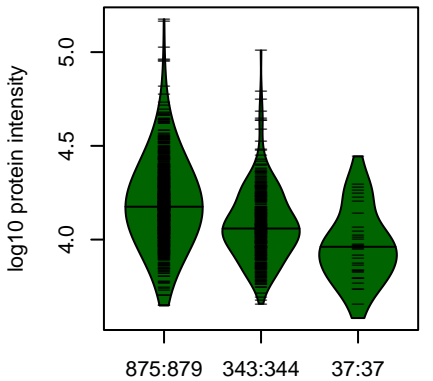

9:101762528:C:T\_T  
 $p = 2e-29$ ,  $\beta = -0.583$ ,  $N = 1255$

**GGVLFAITDAFQK pc2**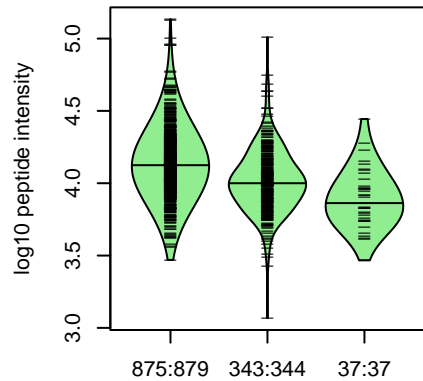

9:101762528:C:T\_T  
 $p = 2.7e-26$ ,  $\beta = -0.55$ ,  $N = 1255$

**IILYYTEPGSHVSQEAAAFSVPVMTHR**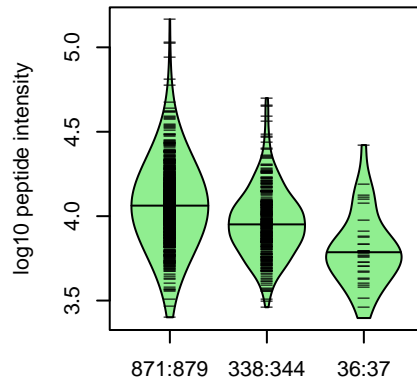

9:101762528:C:T\_T  
 $p = 5.4e-26$ ,  $\beta = -0.551$ ,  $N = 1245$

**VIYLGLR pc2**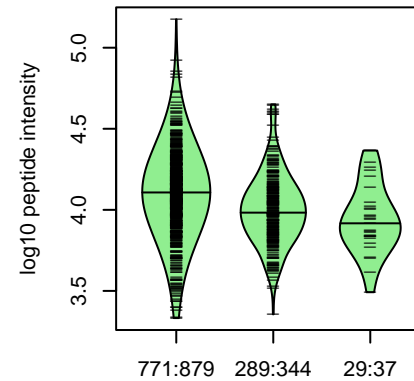

9:101762528:C:T\_T  
 $p = 1.1e-12$ ,  $\beta = -0.408$ ,  $N = 1089$

**TLIPSTFFR pc2**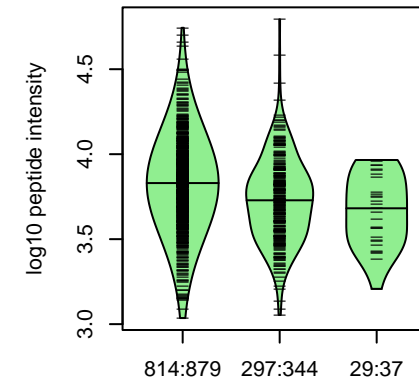

9:101762528:C:T\_T  
 $p = 6.6e-11$ ,  $\beta = -0.37$ ,  $N = 1140$

**P39059 NP2**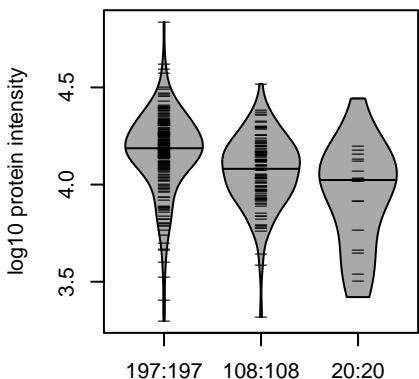

rs57410362  
 $p = 1.8e-07$ ,  $\beta = -0.462$ ,  $N = 325$

**VIYLGLR pc2**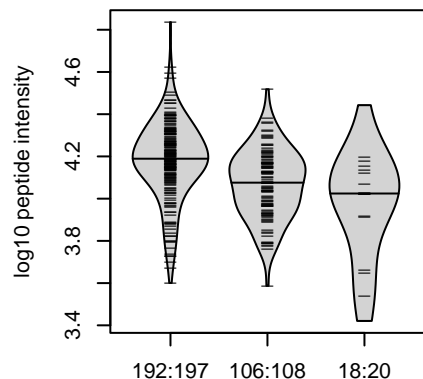

rs57410362  
 $p = 7.9e-09$ ,  $\beta = -0.52$ ,  $N = 316$

**GGVLFAITDAFQK pc2**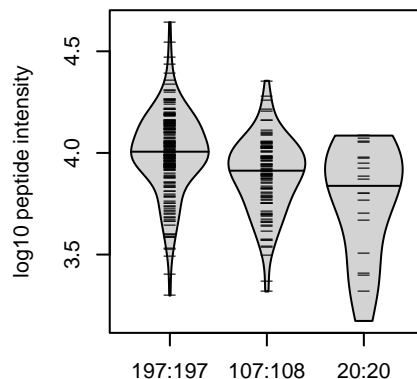

rs57410362  
 $p = 4.5e-08$ ,  $\beta = -0.482$ ,  $N = 324$

**IILYYTEPGSHVSQEAAAFSVPVMTHR**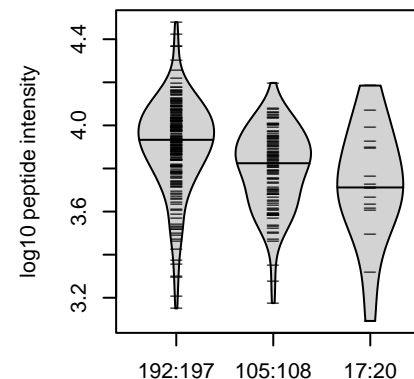

rs57410362  
 $p = 1.4e-06$ ,  $\beta = -0.443$ ,  $N = 314$

**LSGVEDGHQR pc2**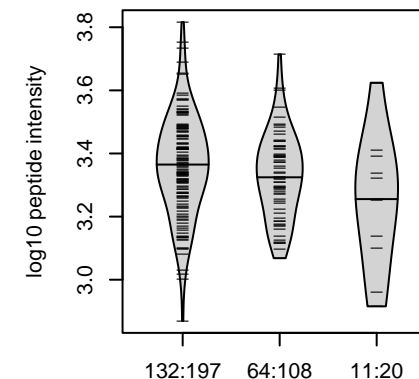

rs57410362  
 $p = 0.053$ ,  $\beta = -0.223$ ,  $N = 207$

**FAMIVQGEEVTLNCEEHSR pc3  
rs2075662 REF**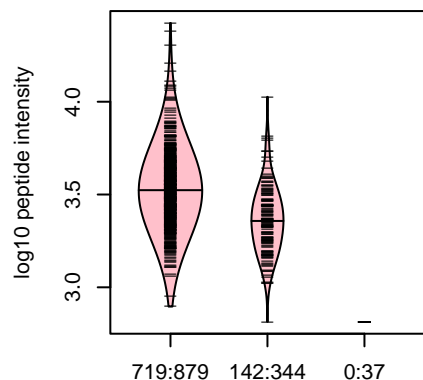

9:101762528:C:T\_T  
 $p = 4.2e-53$ ,  $\text{model} = \text{REC}$ ,  $N = 861$

Locus: 45 (Sort: 53)  
 Status: Replicated  
 80% power: Yes  
 SNP: 9:101762528:C:T  
 rsID: rs57410362  
 UniProtID: P39059  
 HGNC gene: COL15A1  
 Type: Cis-pQTL

**COLEC12 [cis]**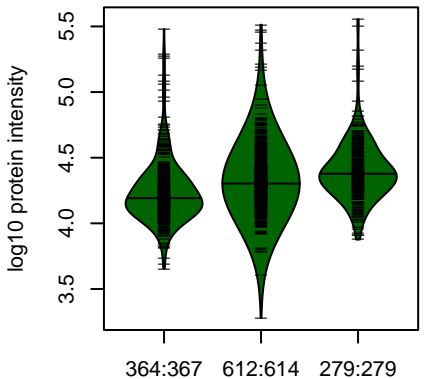

18:334742:C:T\_T  
 $p = 1.3e-28$ ,  $\beta = 0.427$ ,  $N = 1255$

**WLDGTSPDYK pc2**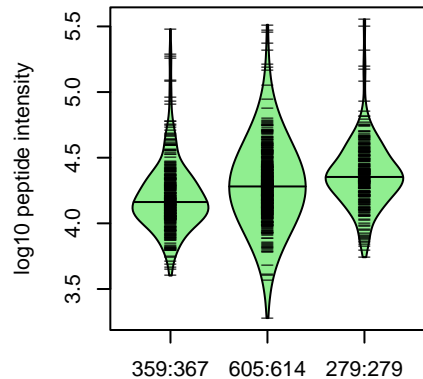

18:334742:C:T\_T  
 $p = 4e-25$ ,  $\beta = 0.401$ ,  $N = 1243$

**SSHLVFINTR pc2**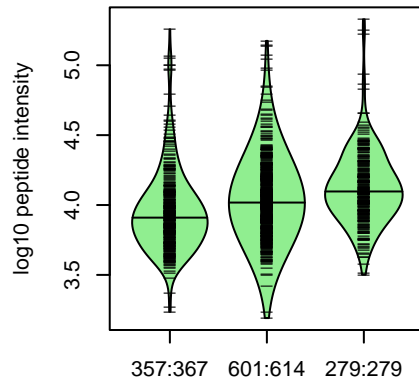

18:334742:C:T\_T  
 $p = 1.4e-22$ ,  $\beta = 0.38$ ,  $N = 1237$

**ESHWIGLTDSERENEWK pc4**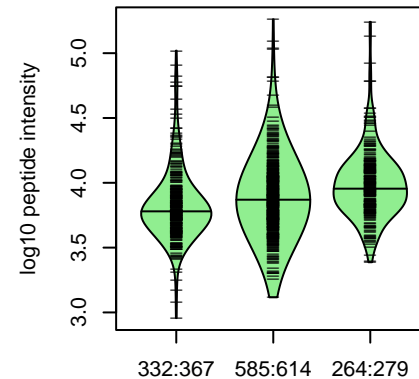

18:334742:C:T\_T  
 $p = 1.4e-19$ ,  $\beta = 0.364$ ,  $N = 1181$

**DRETVLSSAL pc2**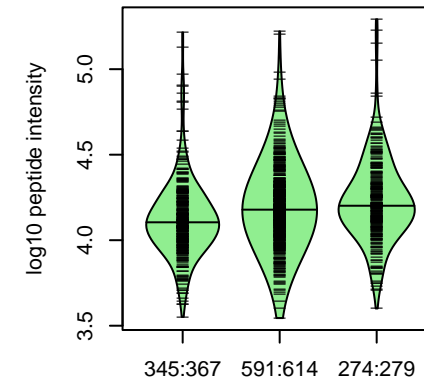

18:334742:C:T\_T  
 $p = 2.8e-11$ ,  $\beta = 0.265$ ,  $N = 1210$

**Q5KU26 NP2**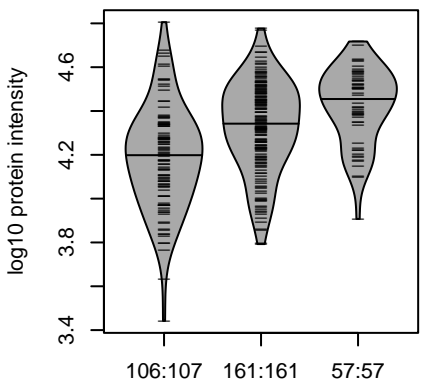

rs2305027  
 $p = 2.6e-11$ ,  $\beta = 0.521$ ,  $N = 324$

**WLDGTSPDYK pc2**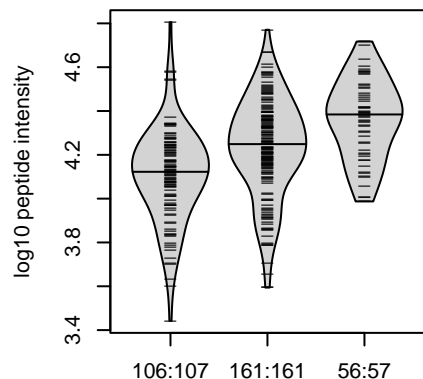

rs2305027  
 $p = 6.2e-13$ ,  $\beta = 0.55$ ,  $N = 323$

**SSHLVFINTR pc2**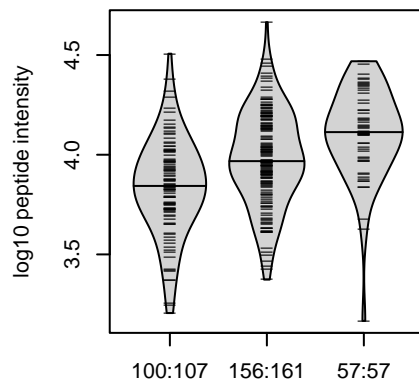

rs2305027  
 $p = 2.4e-11$ ,  $\beta = 0.518$ ,  $N = 313$

**CYYFSVEK pc2**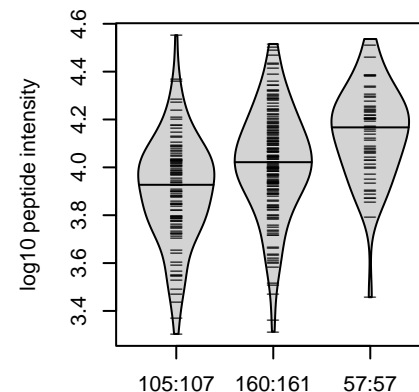

rs2305027  
 $p = 6.2e-11$ ,  $\beta = 0.503$ ,  $N = 322$

**ESHWIGLTDSERENEWK pc4**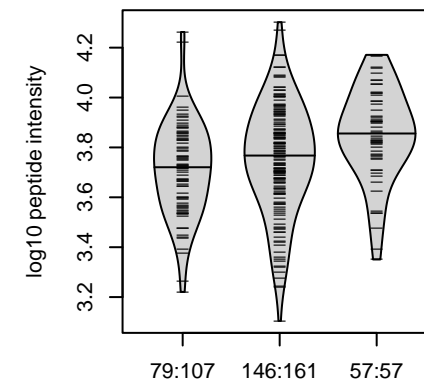

rs2305027  
 $p = 5.3e-05$ ,  $\beta = 0.339$ ,  $N = 282$

Locus: 46 (Sort: 54)  
 Status: Replicated  
 80% power: Yes  
 SNP: 18:334742:C:T  
 rsID: rs2305027  
 UniProtID: Q5KU26  
 HGNC gene: COLEC12  
 Type: Cis-pQTL

**FN3K [cis]**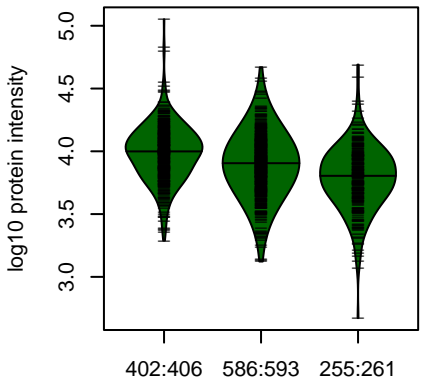

17:80792728:C:T\_T  
 $p = 1.5e-28$ ,  $\beta = -0.426$ ,  $N = 1243$

**QMFEGEVASLEALR pc2**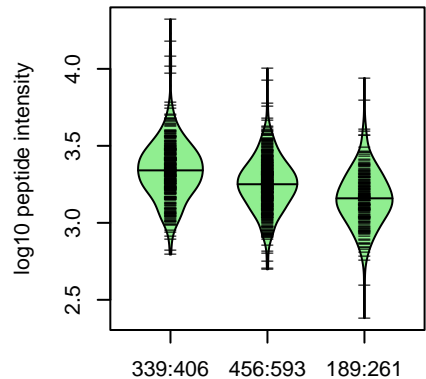

17:80792728:C:T\_T  
 $p = 8.2e-28$ ,  $\beta = -0.47$ ,  $N = 984$

**AYDTDAGPVFVK pc2**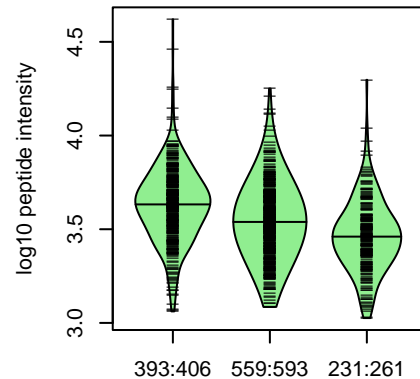

17:80792728:C:T\_T  
 $p = 2e-27$ ,  $\beta = -0.43$ ,  $N = 1183$

**VIDLPGGGAAFVMEHLK pc3**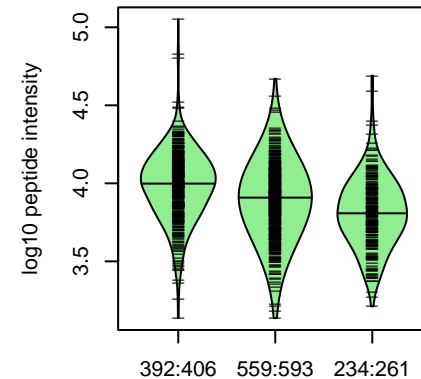

17:80792728:C:T\_T  
 $p = 1.4e-23$ ,  $\beta = -0.397$ ,  $N = 1185$

**SPSLGTMR pc2**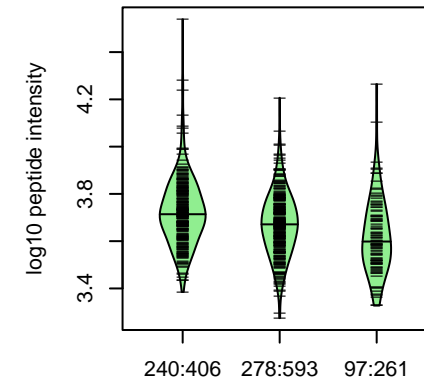

17:80792728:C:T\_T  
 $p = 1e-10$ ,  $\beta = -0.362$ ,  $N = 615$

**Q9H479 NP1**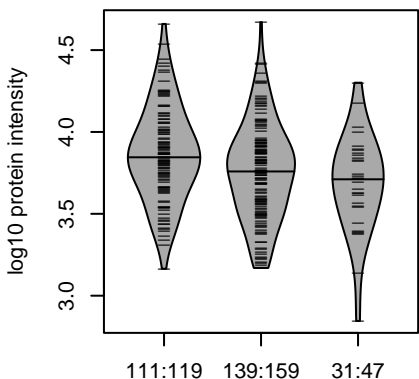

rs11654320  
 $p = 0.00072$ ,  $\beta = -0.305$ ,  $N = 281$

**AYDTDAGPVFVK pc2**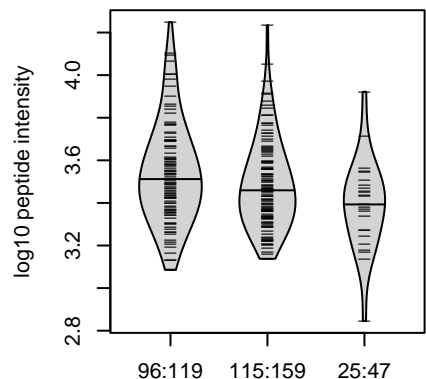

rs11654320  
 $p = 0.0028$ ,  $\beta = -0.292$ ,  $N = 236$

**VIDLPGGGAAFVMEHLK pc3**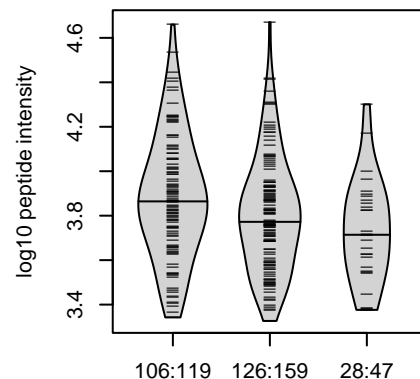

rs11654320  
 $p = 0.01$ ,  $\beta = -0.24$ ,  $N = 260$

**QMFEGEVASLEALR pc2**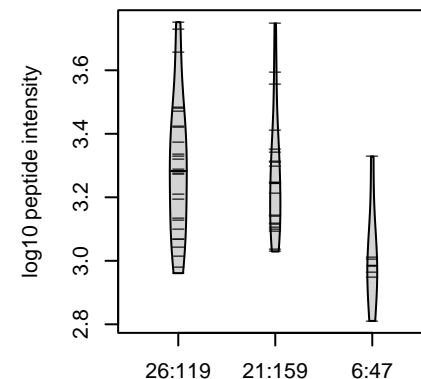

rs11654320  
 $p = 0.03$ ,  $\beta = -0.412$ ,  $N = 53$

**LGEQMADLHLYNQK pc3**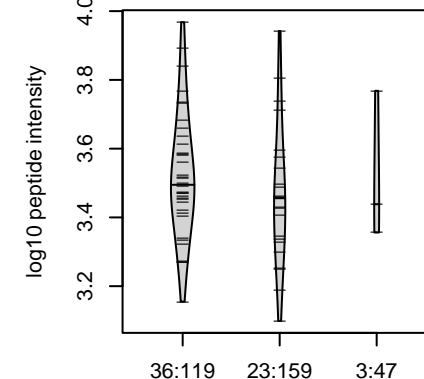

rs11654320  
 $p = 0.24$ ,  $\beta = -0.241$ ,  $N = 62$

Locus: 47 (Sort: 55)  
 Status: Not replicated  
 80% power: Yes  
 SNP: 17:80792728:C:T  
 rsID: rs11654320  
 UniProtID: Q9H479  
 HGNC gene: FN3K  
 Type: Cis-pQTL

**PDIA5 [cis]**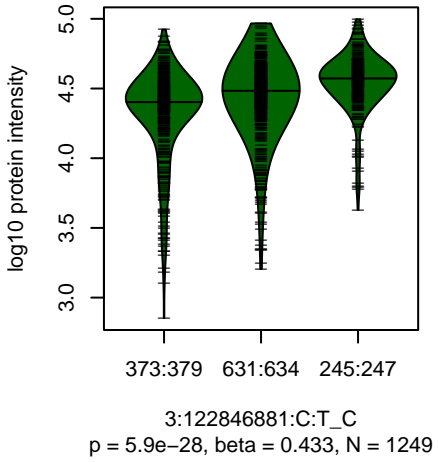**FHISEFPTLK pc2**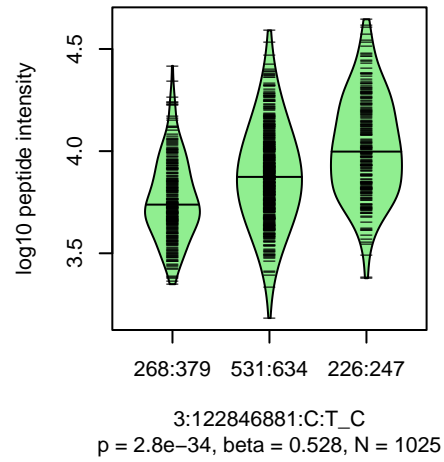**AAEALHGEADSSGVLAAVDATVNK f**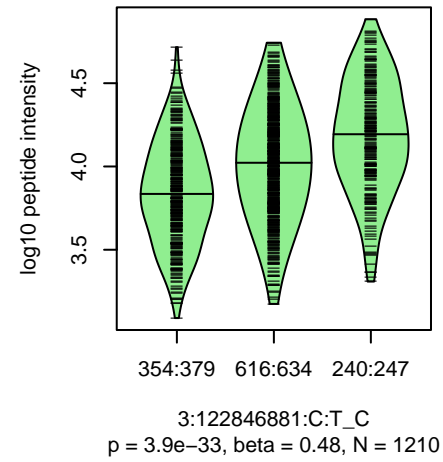**VIPHFTATADAFK pc3**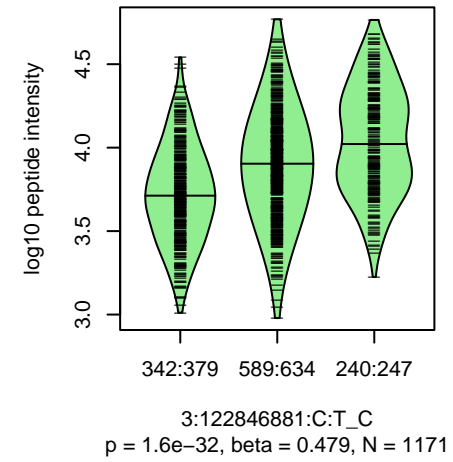**IACAAVDCVK pc2**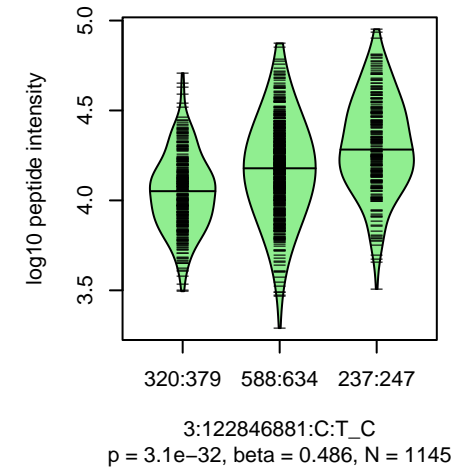**Q14554 NP1**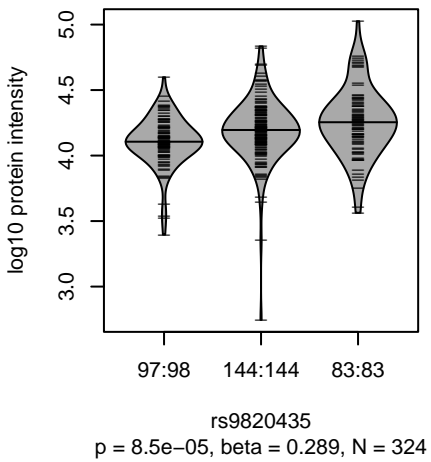**AAEALHGEADSSGVLAAVDATVNK f**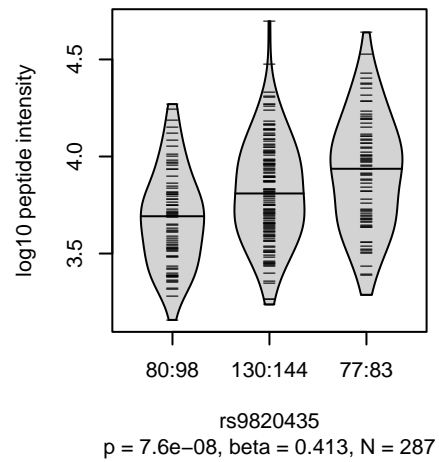**VIPHFTATADAFK pc2**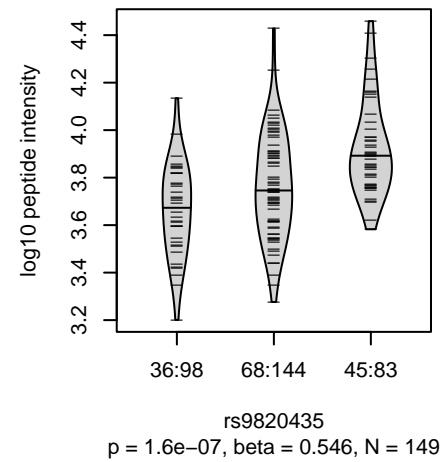**SEVAAENHLR pc2**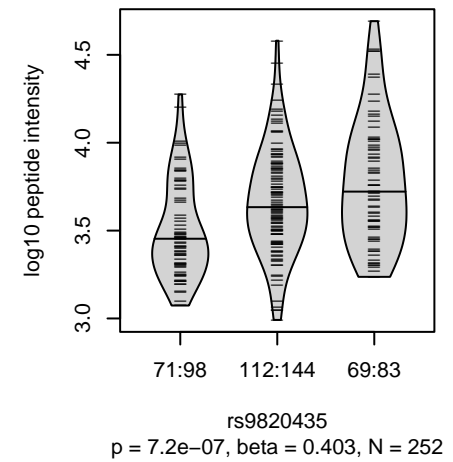**YDSRTELGFNTYIR pc3**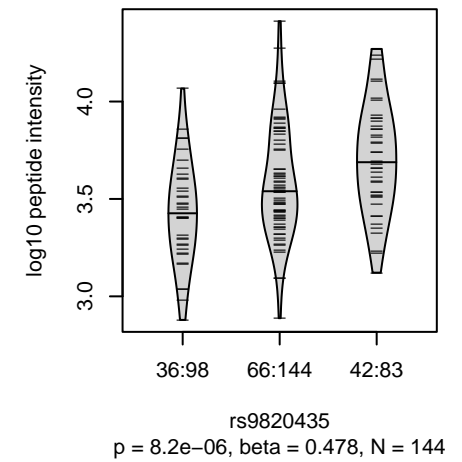

Locus: 48 (Sort: 56)  
 Status: Replicated  
 80% power: Yes  
 SNP: 3:122846881:C:T  
 rsID: rs9820435  
 UniProtID: Q14554  
 HGNC gene: PDIA5  
 Type: Cis-pQTL



**HLA-A [cis]**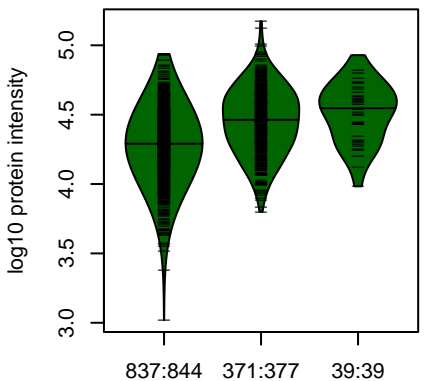

6:31332005:T:G\_G  
 $p = 7.5e-28$ ,  $\beta = 0.557$ ,  $N = 1247$

**FIAGVYDDTQFVR pc2**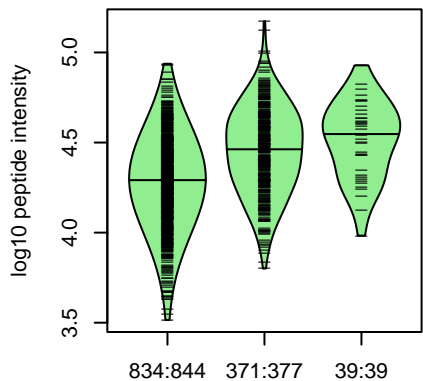

6:31332005:T:G\_G  
 $p = 2.9e-27$ ,  $\beta = 0.551$ ,  $N = 1244$

**DYIALNEDLR pc2**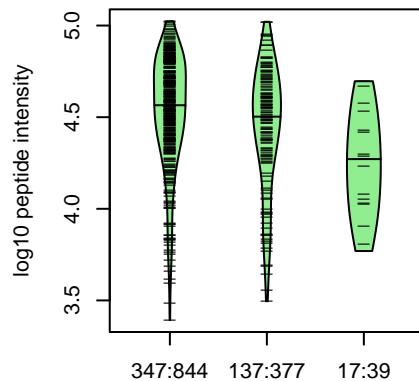

6:31332005:T:G\_G  
 $p = 0.0013$ ,  $\beta = -0.263$ ,  $N = 501$

**AYLDGTCVEWLR pc2**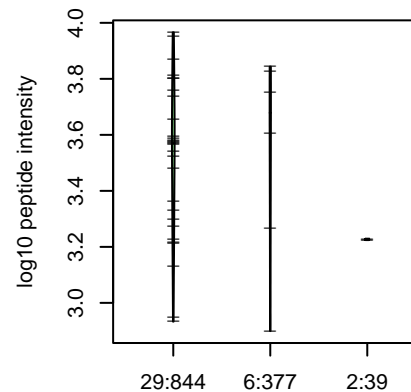

6:31332005:T:G\_G  
 $p = 0.24$ ,  $\beta = -0.331$ ,  $N = 37$

**THMTHHPISDHEATLR pc3**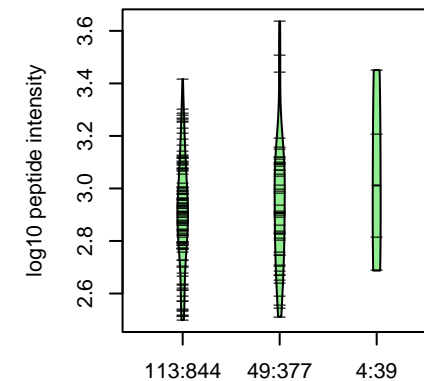

6:31332005:T:G\_G  
 $p = 0.25$ ,  $\beta = 0.168$ ,  $N = 166$

**Q5SRN5 NP1**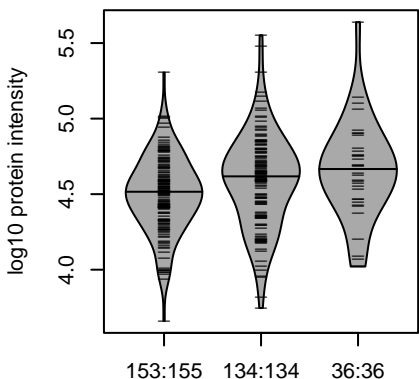

rs9266353  
 $p = 0.00031$ ,  $\beta = 0.29$ ,  $N = 323$

**FIAGVYDDTQFVR pc2**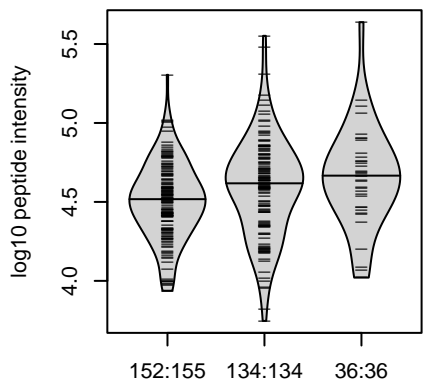

rs9266353  
 $p = 0.00056$ ,  $\beta = 0.28$ ,  $N = 322$

**YTCHVQHEGLPK pc3**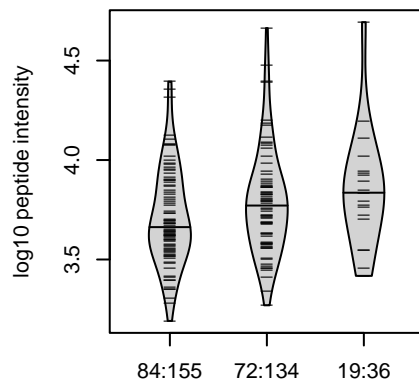

rs9266353  
 $p = 0.031$ ,  $\beta = 0.237$ ,  $N = 175$

**DYIALNEDLR pc2**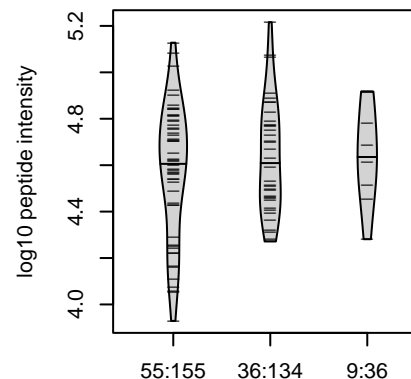

rs9266353  
 $p = 0.49$ ,  $\beta = 0.102$ ,  $N = 100$

**THMTHHPISDHEATLR pc4**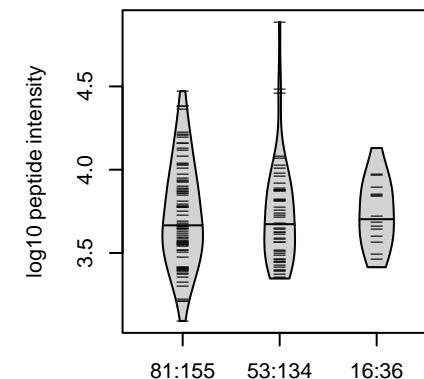

rs9266353  
 $p = 0.62$ ,  $\beta = 0.0587$ ,  $N = 150$

**SWTAADMAAQITK pc2  
rs1059517 REF**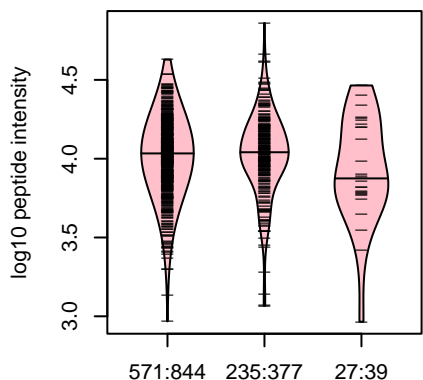

6:31332005:T:G\_G  
 $p = 0.1$ ,  $\text{model} = \text{REC}$ ,  $N = 833$

**SWTAADMAAQITQR pc2  
rs1059517 ALT**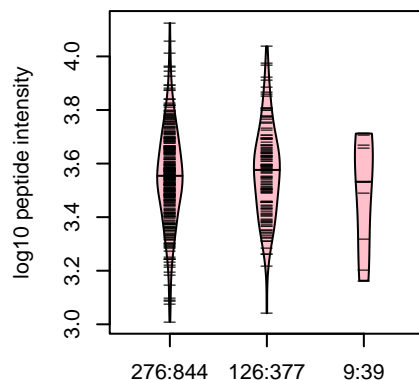

6:31332005:T:G\_G  
 $p = 0.23$ ,  $\text{model} = \text{DOM}$ ,  $N = 411$

**AQSQTDRVDLGLTLR pc3  
rs1071742;rs199474457 REF**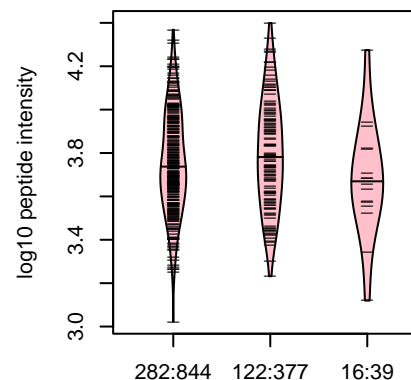

6:31332005:T:G\_G  
 $p = 0.3$ ,  $\text{model} = \text{DOM}$ ,  $N = 420$

**FDSAASQR pc2  
rs707910 REF**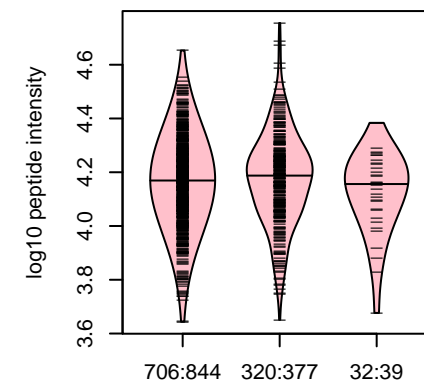

6:31332005:T:G\_G  
 $p = 0.66$ ,  $\text{model} = \text{DOM}$ ,  $N = 1058$

Locus: 49 (Sort: 57)  
 Status: Not replicated  
 80% power: Yes  
 SNP: 6:31332005:T:G  
 rsID: rs9266353  
 UniProtID: Q5SRN5  
 HGNC gene: HLA-A  
 Type: Cis-pQTL

**SERPINE2 [cis]**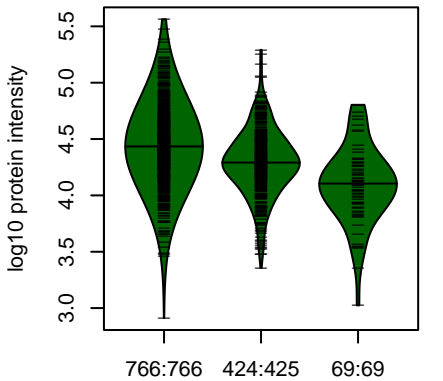

2:224880498:T:C\_C  
 $p = 7.7e-28$ ,  $\beta = -0.502$ ,  $N = 1259$

**TIDSWMSIMVPK pc2**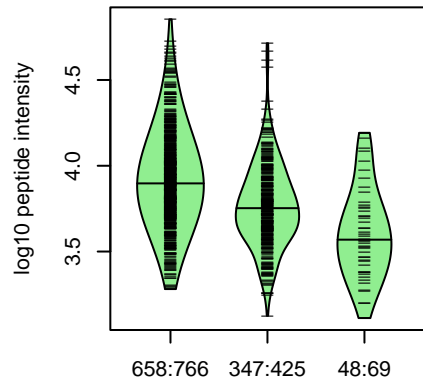

2:224880498:T:C\_C  
 $p = 6.2e-29$ ,  $\beta = -0.575$ ,  $N = 1053$

**VLGITDMFDSSK pc2**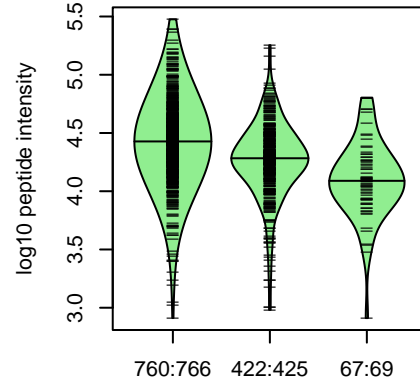

2:224880498:T:C\_C  
 $p = 3.2e-26$ ,  $\beta = -0.491$ ,  $N = 1249$

**LVLVNAVYFK pc2**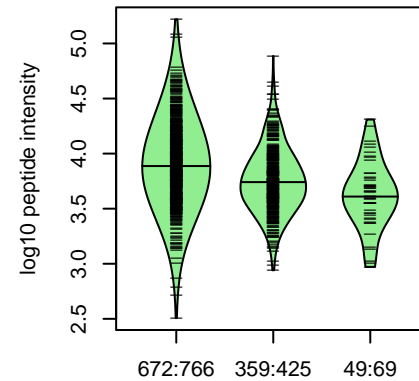

2:224880498:T:C\_C  
 $p = 9.6e-18$ ,  $\beta = -0.442$ ,  $N = 1080$

**DIVTVANAVFVK pc2**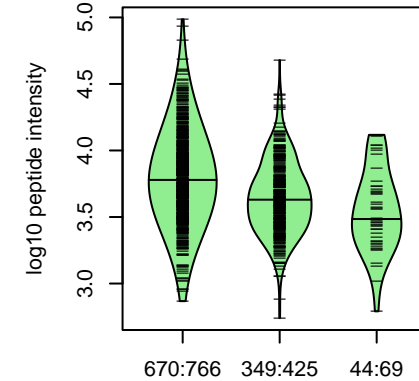

2:224880498:T:C\_C  
 $p = 1.1e-17$ ,  $\beta = -0.451$ ,  $N = 1063$

**P07093 NP4**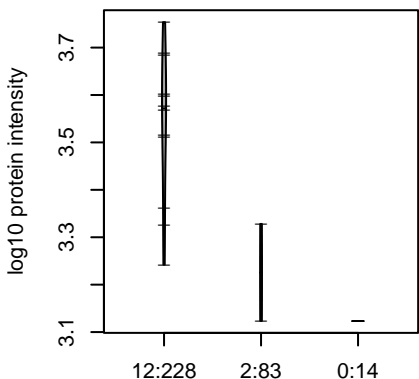

rs68066031  
 $p = 0.57$ ,  $\beta = -0.357$ ,  $N = 14$

**SYQVPMLAQLSVFR pc2**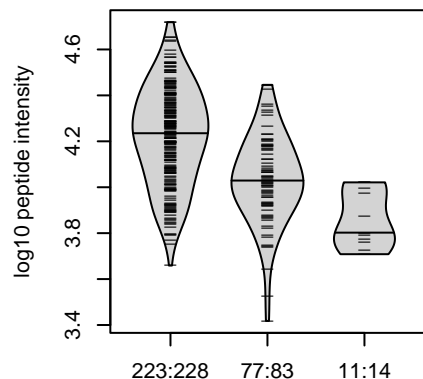

rs68066031  
 $p = 2.9e-14$ ,  $\beta = -0.758$ ,  $N = 311$

**iRPHDNIVISPHGIASVLGMLQLGADGF**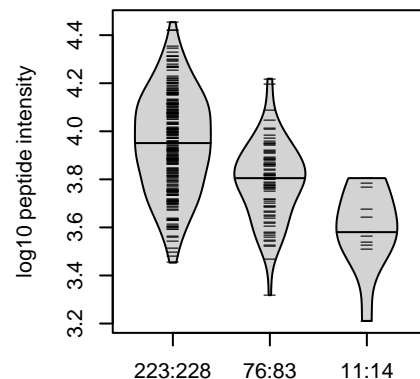

rs68066031  
 $p = 9.8e-13$ ,  $\beta = -0.717$ ,  $N = 310$

**LVLVNAVYFK pc2**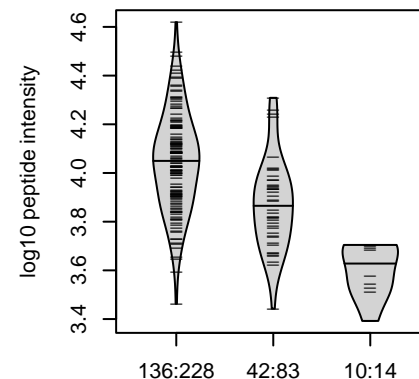

rs68066031  
 $p = 1.8e-11$ ,  $\beta = -0.793$ ,  $N = 188$

**HNPTGAVLFMGQINKP pc3**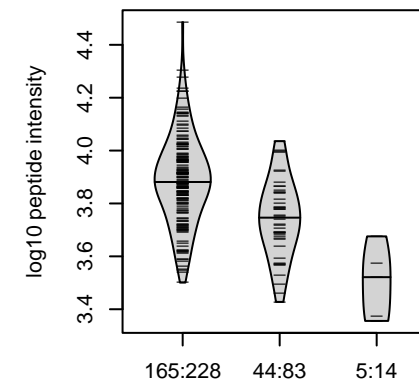

rs68066031  
 $p = 2.1e-09$ ,  $\beta = -0.797$ ,  $N = 214$

Locus: 50 (Sort: 58)  
 Status: Not replicated  
 80% power: No  
 SNP: 2:224880498:T:C  
 rsID: rs68066031  
 UniProtID: P07093  
 HGNC gene: SERPINE2  
 Type: Cis-pQTL

**SERPINE2 [cis]**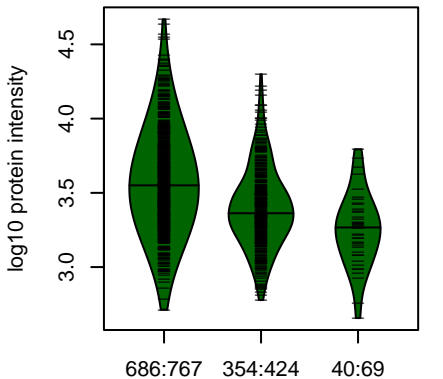

2:224874874:G:A\_A  
 $p = 5.6e-24$ ,  $\beta = -0.533$ ,  $N = 1080$

**VLGITDMFDSSK pc2**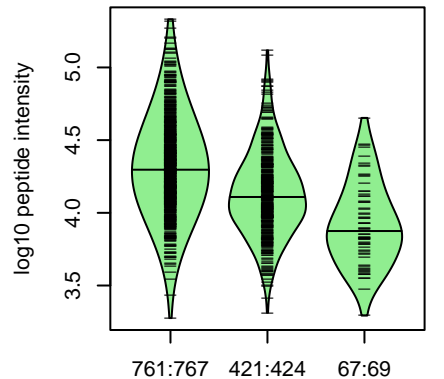

2:224874874:G:A\_A  
 $p = 1.8e-39$ ,  $\beta = -0.602$ ,  $N = 1249$

**SYQVPMLAQLSVFR pc2**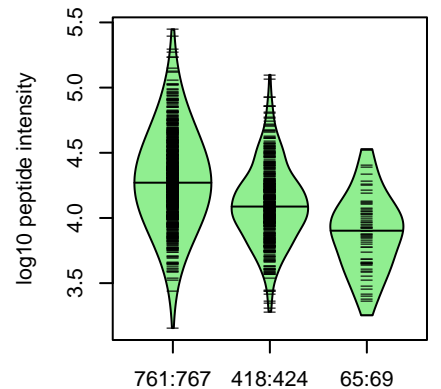

2:224874874:G:A\_A  
 $p = 3e-38$ ,  $\beta = -0.596$ ,  $N = 1244$

**LVLVNAVYFK pc2**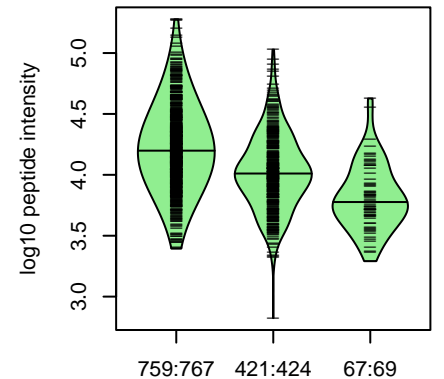

2:224874874:G:A\_A  
 $p = 3.5e-38$ ,  $\beta = -0.592$ ,  $N = 1247$

**DIVTVANAVFVK pc2**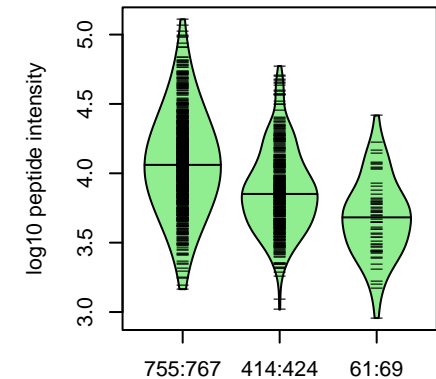

2:224874874:G:A\_A  
 $p = 6e-37$ ,  $\beta = -0.594$ ,  $N = 1230$

**P07093 NP3**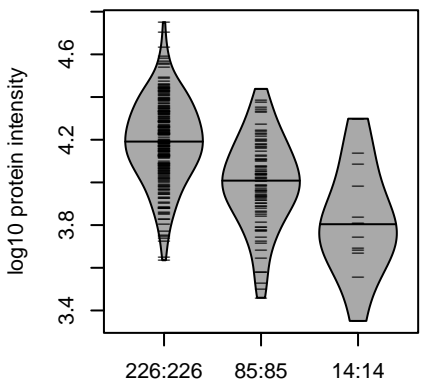

rs13412535  
 $p = 9.7e-17$ ,  $\beta = -0.766$ ,  $N = 325$

**ASAATTAILIAR pc2**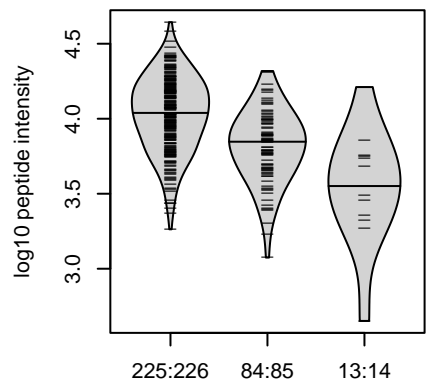

rs13412535  
 $p = 7.6e-15$ ,  $\beta = -0.739$ ,  $N = 322$

**SYQVPMLAQLSVFR pc2**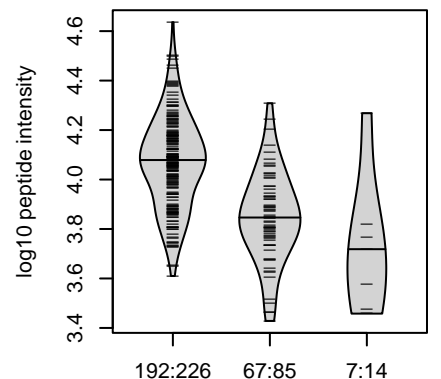

rs13412535  
 $p = 9.9e-15$ ,  $\beta = -0.861$ ,  $N = 266$

**VLGITDMFDSSK pc2**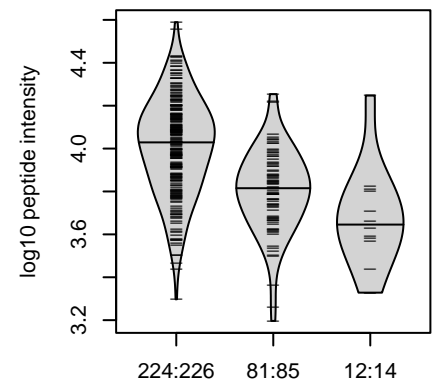

rs13412535  
 $p = 1.8e-14$ ,  $\beta = -0.745$ ,  $N = 317$

**DIVTVANAVFVK pc2**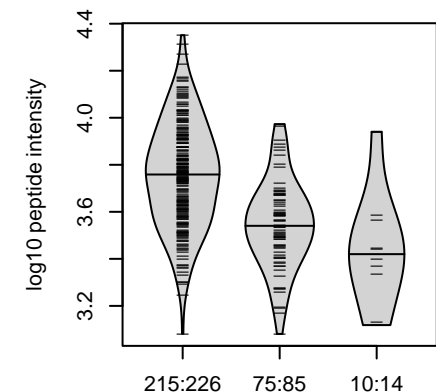

rs13412535  
 $p = 3.1e-13$ ,  $\beta = -0.748$ ,  $N = 300$

Locus: 50 (Sort: 59)  
 Status: Replicated  
 80% power: Yes  
 SNP: 2:224874874:G:A  
 rsID: rs13412535  
 UniProtID: P07093  
 HGNC gene: SERPINE2  
 Type: Cis-pQTL



**CCL23 [trans]**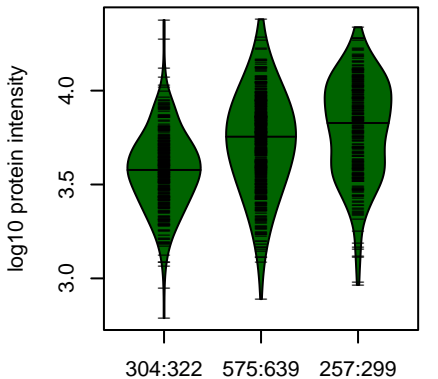

3:186395572:A:T\_A  
 $p = 7.3e-27$ ,  $\beta = 0.441$ ,  $N = 1136$

**FHATSADCCISYTPR pc3**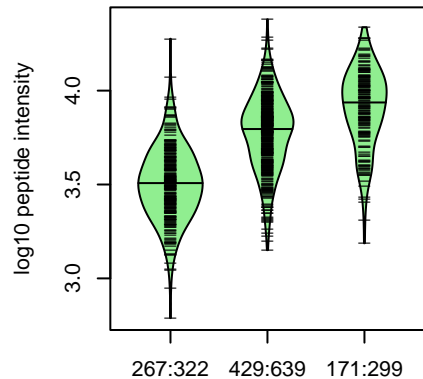

3:186395572:A:T\_A  
 $p = 2.6e-77$ ,  $\beta = 0.813$ ,  $N = 867$

**LPLENPVLLDR pc2**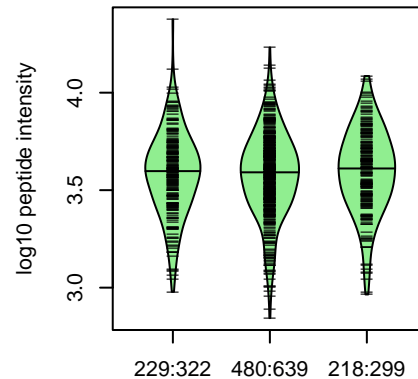

3:186395572:A:T\_A  
 $p = 0.39$ ,  $\beta = 0.0405$ ,  $N = 927$

**DAETEFMMSK pc2**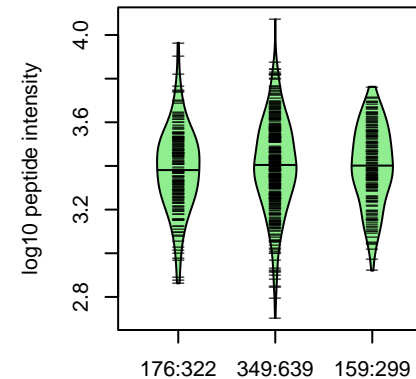

3:186395572:A:T\_A  
 $p = 0.65$ ,  $\beta = 0.0246$ ,  $N = 684$

**PGVIFLTK pc2**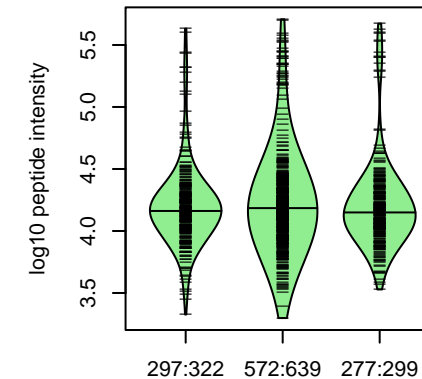

3:186395572:A:T\_A  
 $p = 0.77$ ,  $\beta = 0.0119$ ,  $N = 1146$

**P55773 NP3**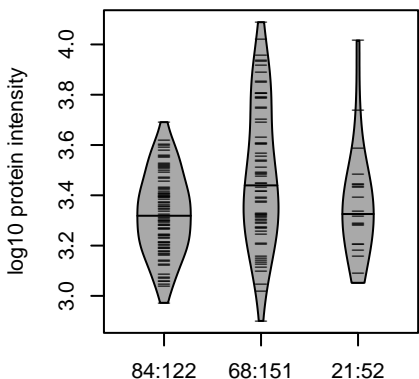

rs1042464  
 $p = 0.17$ ,  $\beta = 0.149$ ,  $N = 173$

**FHATSADCCISYTPR pc3**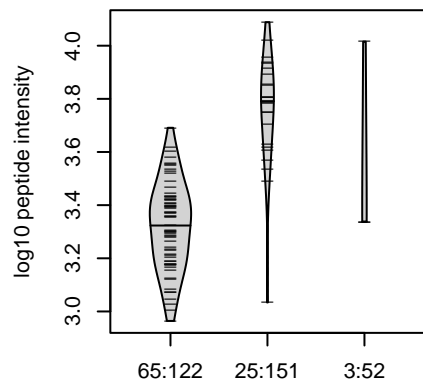

rs1042464  
 $p = 9.6e-08$ ,  $\beta = 0.929$ ,  $N = 93$

**PGVIFLTK pc2**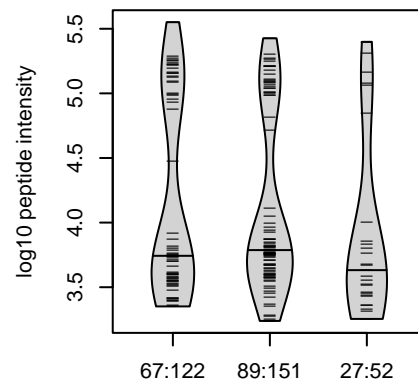

rs1042464  
 $p = 0.26$ ,  $\beta = -0.12$ ,  $N = 183$

**LPLENPVLLDR pc2**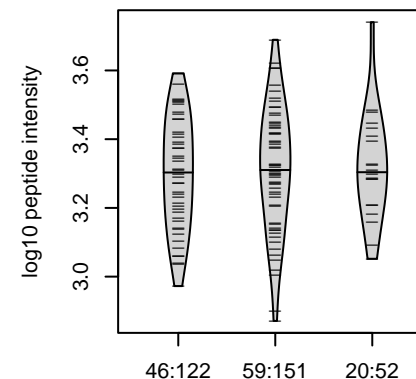

rs1042464  
 $p = 0.99$ ,  $\beta = 0.00206$ ,  $N = 125$

Locus: 52 (Sort: 61)  
 Status: Not replicated  
 80% power: No  
 SNP: 3:186395572:A:T  
 rsID: rs1042464  
 UniProtID: P55773  
 HGNC gene: CCL23  
 Type: Trans-pQTL

**HNRNPA3 [trans]**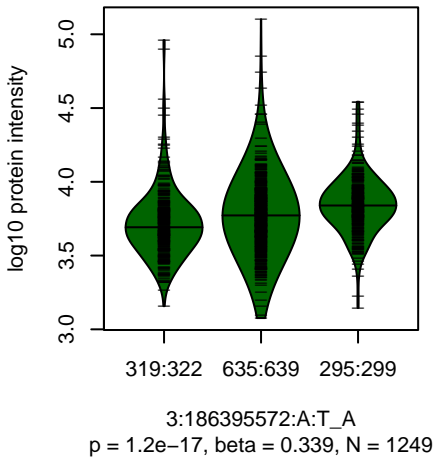**IETIEVMEDR pc2**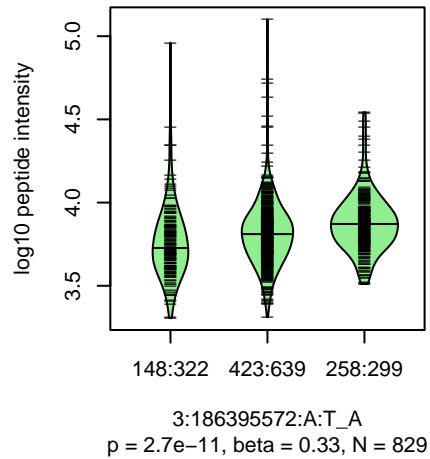**GFGFVTYSCVEEVDAAAMCARPHK p**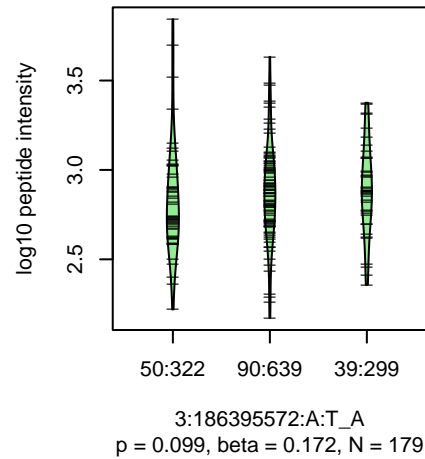**EDTEEYNLR pc2**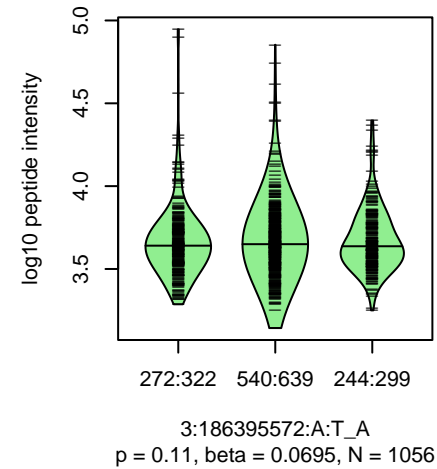**LFIGGLSFETTDDSLREHFEK pc4**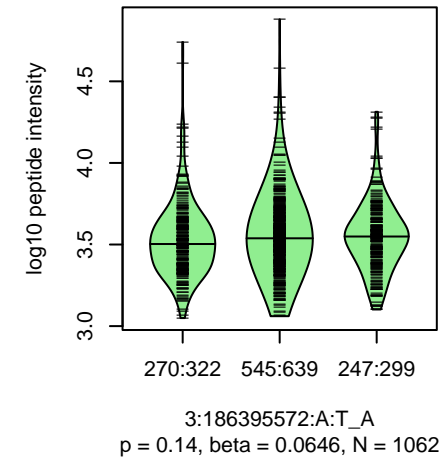**A0A7I2V4G0 NP1**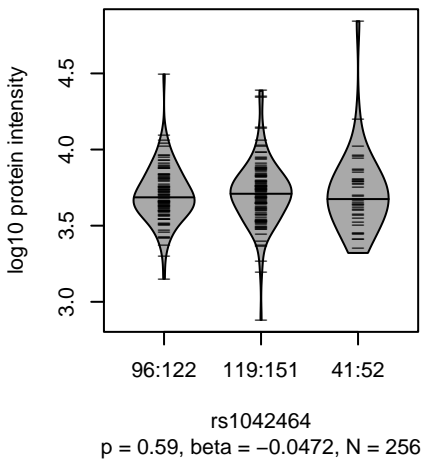**EDSVKPGAHLTVK pc3**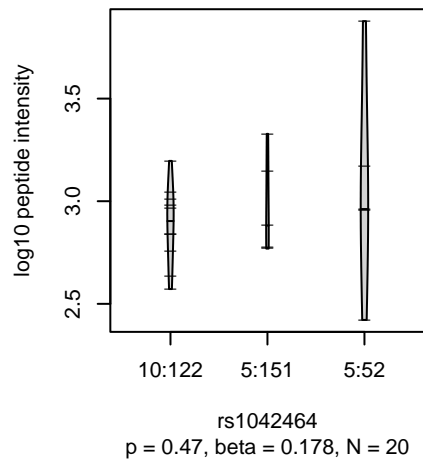**LFIGGLSFETTDDSLREHFEK pc4**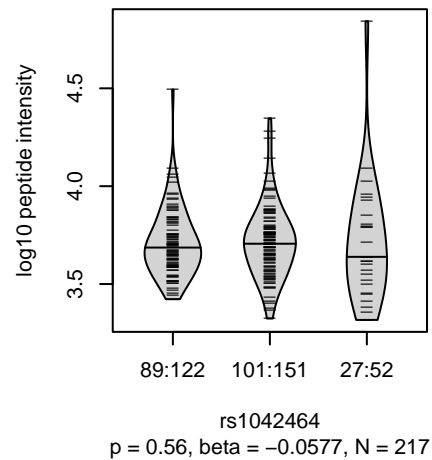**WGTLTDCVVMR pc2**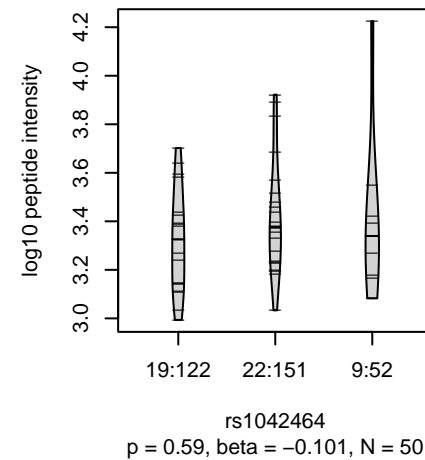**EDTEEYNLR pc2**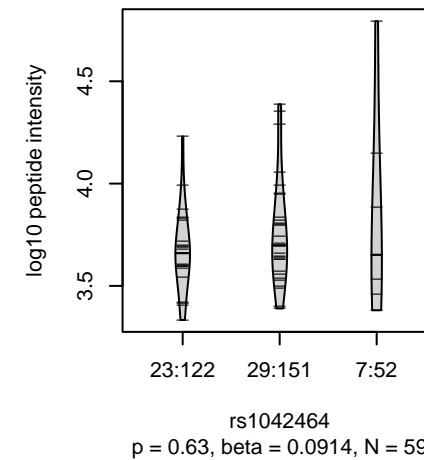

Locus: 52 (Sort: 62)  
 Status: Not replicated  
 80% power: No  
 SNP: 3:186395572:A:T  
 rsID: rs1042464  
 UniProtID: A0A7I2V4G0  
 HGNC gene: HNRNPA3  
 Type: Trans-pQTL

**GNB2 [trans]**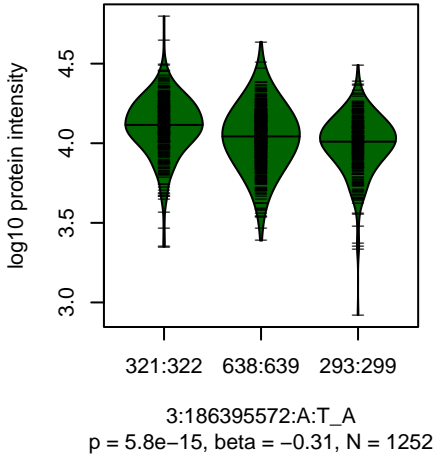**TFVSGACDASIK pc2**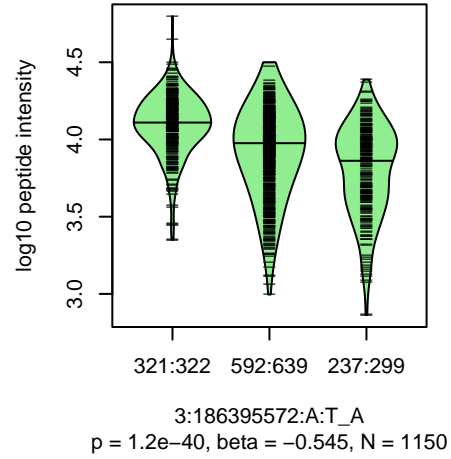**ACGDSTLTQITAGLDPVGR pc3**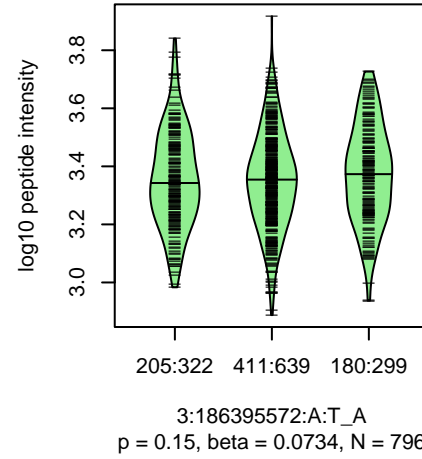**VHAIPLR pc2**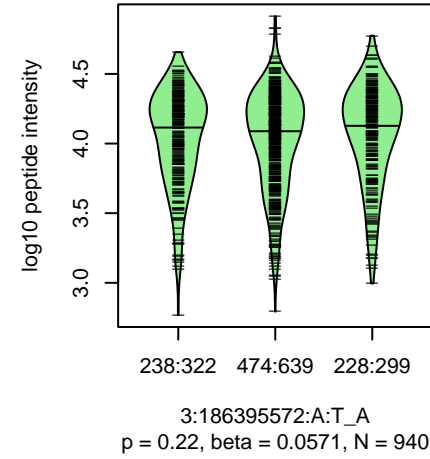**AGVLAGHDNR pc2**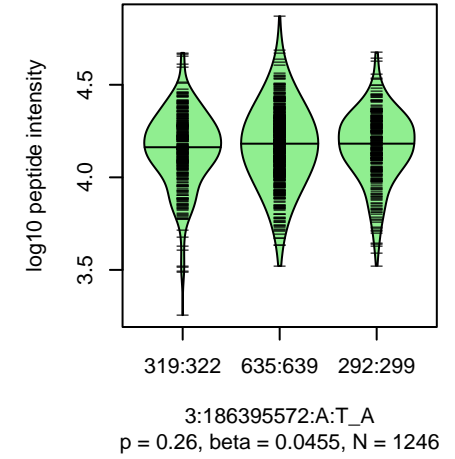**P62879 NP1**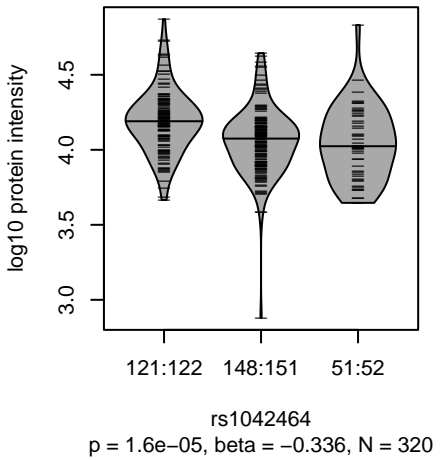**TFVSGACDASIK pc2**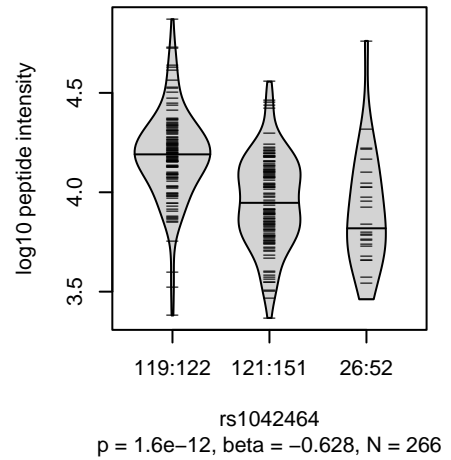**IYAMHWGTDSR pc3**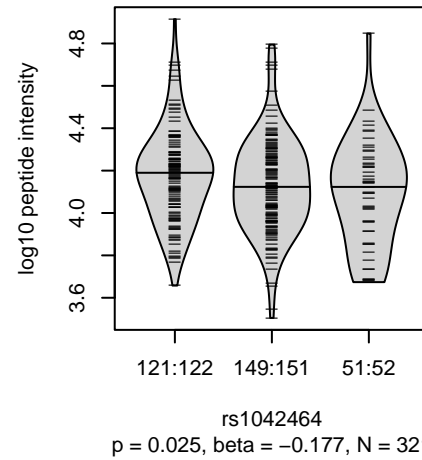**AGVLAGHDNR pc2**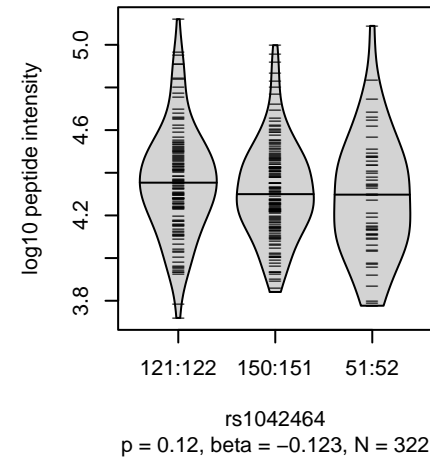**VSCLGVTTDDGMAVATGSWDSFLK p**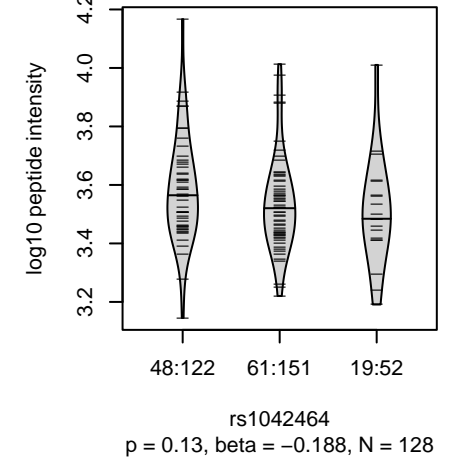

Locus: 52 (Sort: 63)  
 Status: Replicated  
 80% power: No  
 SNP: 3:186395572:A:T  
 rsID: rs1042464  
 UniProtID: P62879  
 HGNC gene: GNB2  
 Type: Trans-pQTL

**HSP90B1 [cis]**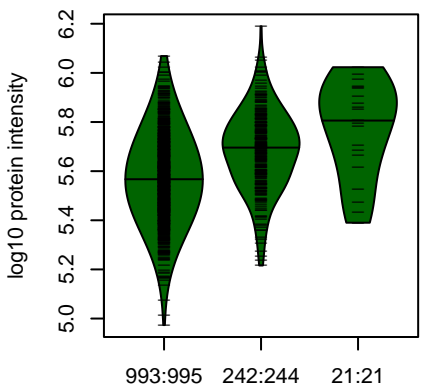

12:104297719:T:C\_T  
 $p = 2.6e-26$ ,  $\beta = 0.639$ ,  $N = 1256$

**DISTNYASQK pc2**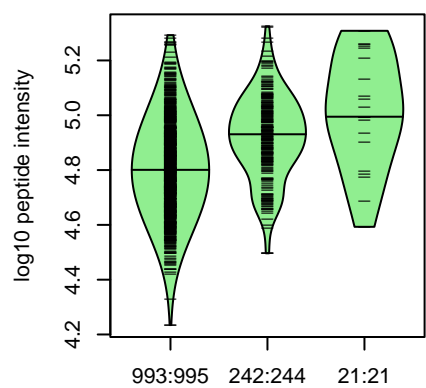

12:104297719:T:C\_T  
 $p = 2.4e-28$ ,  $\beta = 0.664$ ,  $N = 1256$

**SGTSEFLNK pc2**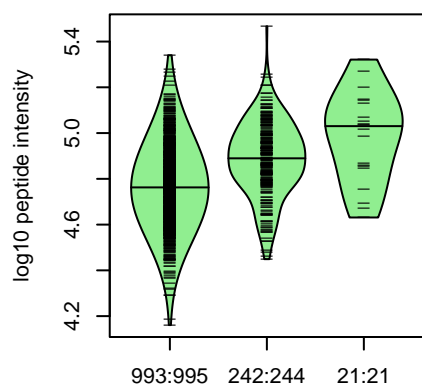

12:104297719:T:C\_T  
 $p = 2.5e-27$ ,  $\beta = 0.651$ ,  $N = 1256$

**EVEEDEYK pc2**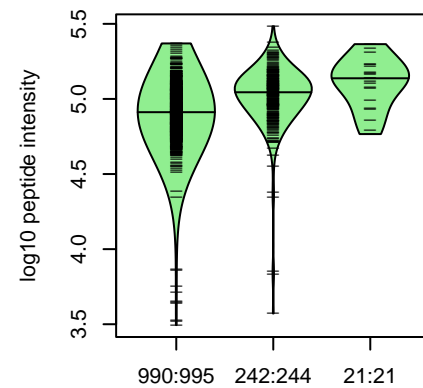

12:104297719:T:C\_T  
 $p = 3.9e-27$ ,  $\beta = 0.649$ ,  $N = 1253$

**SILFVPTSAPR pc2**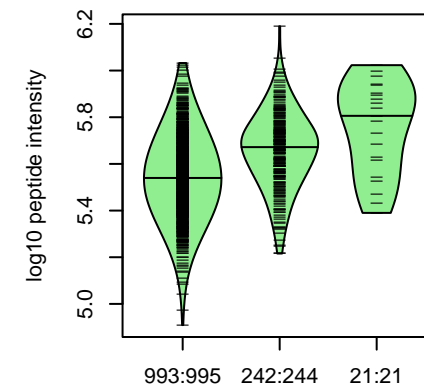

12:104297719:T:C\_T  
 $p = 6.6e-26$ ,  $\beta = 0.634$ ,  $N = 1256$

**P14625 NP2**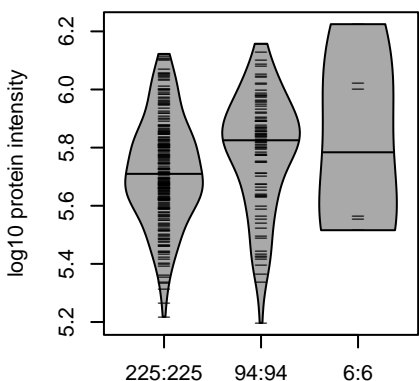

rs1866075  
 $p = 0.022$ ,  $\beta = 0.249$ ,  $N = 325$

**TFEINPR pc2**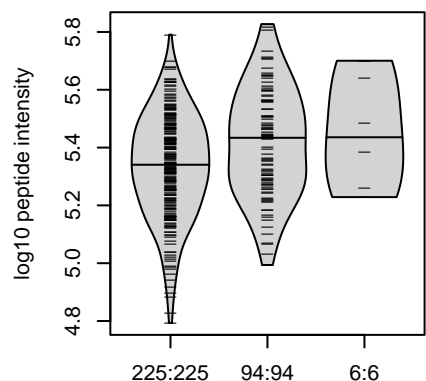

rs1866075  
 $p = 0.00038$ ,  $\beta = 0.381$ ,  $N = 325$

**EVEEDEYK pc2**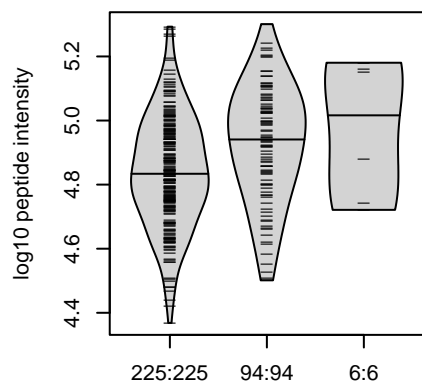

rs1866075  
 $p = 8e-04$ ,  $\beta = 0.36$ ,  $N = 325$

**ETLQQHK pc2**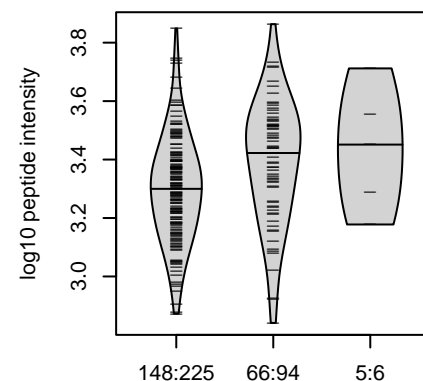

rs1866075  
 $p = 0.002$ ,  $\beta = 0.389$ ,  $N = 219$

**NLLHVTDTGVGMTR pc3**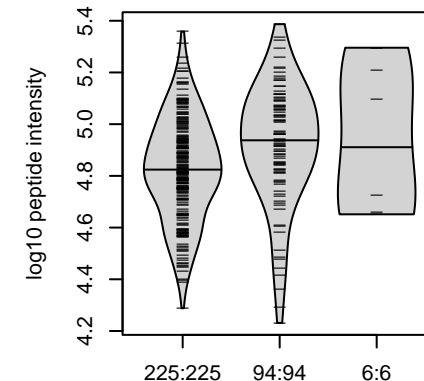

rs1866075  
 $p = 0.003$ ,  $\beta = 0.319$ ,  $N = 325$

Locus: 53 (Sort: 64)  
 Status: Not replicated  
 80% power: Yes  
 SNP: 12:104297719:T:C  
 rsID: rs1866075  
 UniProtID: P14625  
 HGNC gene: HSP90B1  
 Type: Cis-pQTL



**HP [cis]**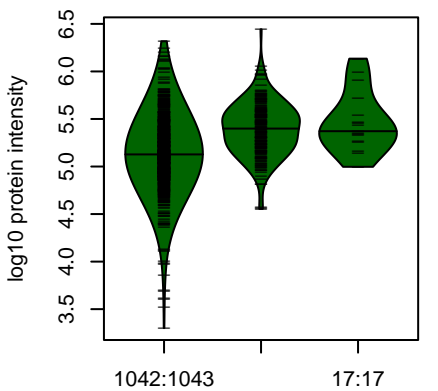

16:72029069:C:A\_A  
 $p = 4.8e-26$ ,  $\beta = 0.686$ ,  $N = 1259$

**VTSIQDWVQK pc2**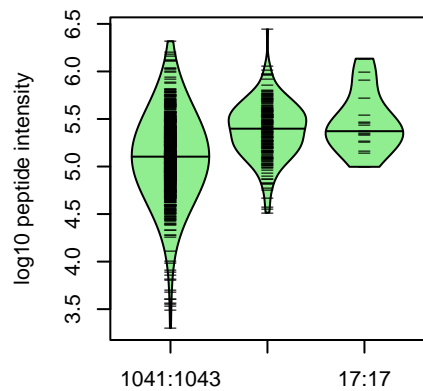

16:72029069:C:A\_A  
 $p = 6.2e-27$ ,  $\beta = 0.698$ ,  $N = 1258$

**TEGDGVYTLNNEK pc2**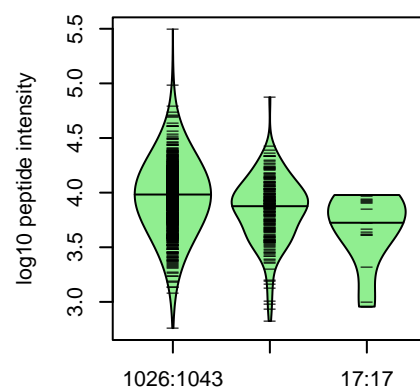

16:72029069:C:A\_A  
 $p = 6.7e-13$ ,  $\beta = -0.475$ ,  $N = 1240$

**LRTEGDGVYTLNNEK pc3**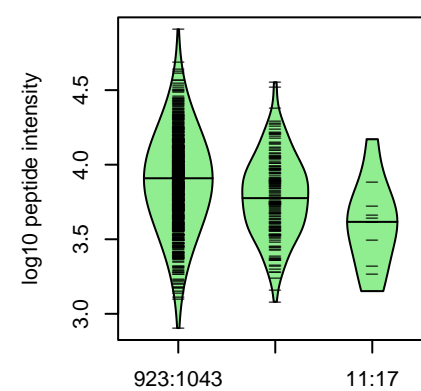

16:72029069:C:A\_A  
 $p = 4.7e-08$ ,  $\beta = -0.402$ ,  $N = 1104$

**TEGDGVYTLNDKK pc3**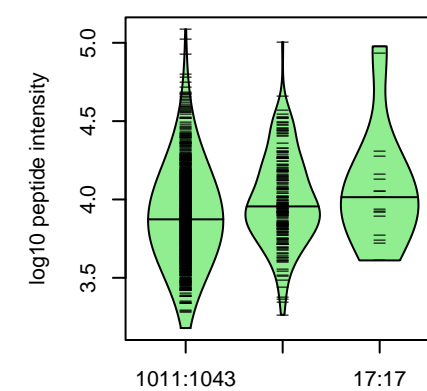

16:72029069:C:A\_A  
 $p = 1.1e-07$ ,  $\beta = 0.356$ ,  $N = 1220$

**P00738 NP4**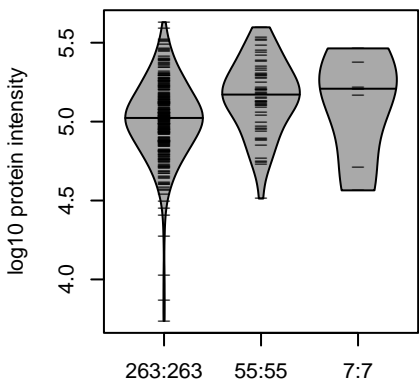

rs12920245  
 $p = 6e-04$ ,  $\beta = 0.412$ ,  $N = 325$

**SCAVAEYGVYVK pc2**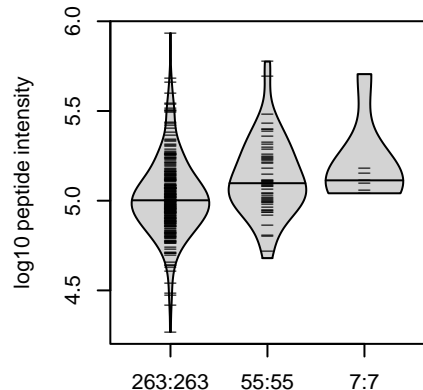

rs12920245  
 $p = 4.3e-05$ ,  $\beta = 0.483$ ,  $N = 325$

**VTSIQDWVQK pc2**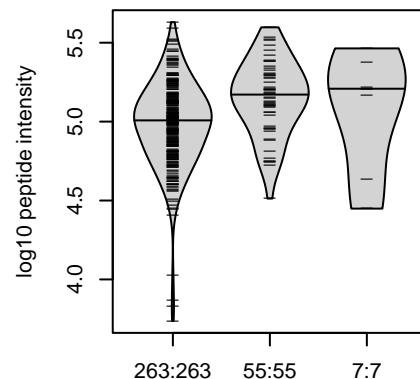

rs12920245  
 $p = 0.00026$ ,  $\beta = 0.432$ ,  $N = 325$

**LPECEAVCGK pc2**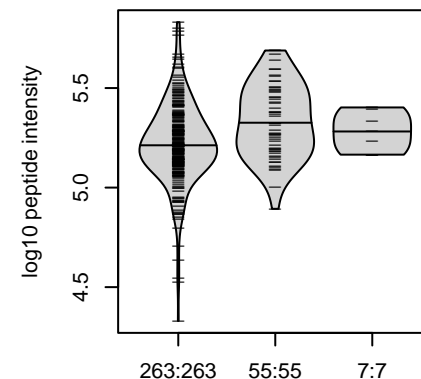

rs12920245  
 $p = 0.00039$ ,  $\beta = 0.42$ ,  $N = 325$

**TEGDGVYTLNNEK pc2**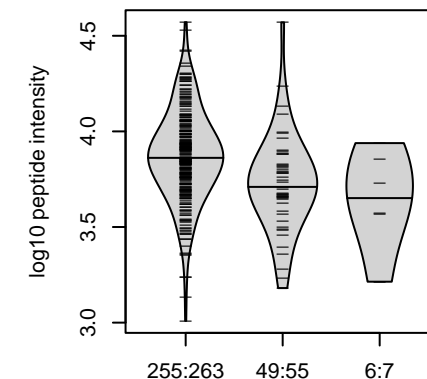

rs12920245  
 $p = 0.00056$ ,  $\beta = -0.432$ ,  $N = 310$

Locus: 54 (Sort: 65)  
 Status: Not replicated  
 80% power: Yes  
 SNP: 16:72029069:C:A  
 rsID: rs12920245  
 UniProtID: P00738  
 HGNC gene: HP  
 Type: Cis-pQTL

**CCL16 [cis]**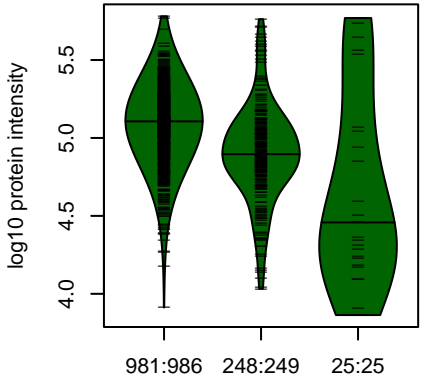

17:34306106:A:G\_G  
 $p = 5.6e-26$ ,  $\beta = -0.617$ ,  $N = 1254$

**DPNLPLLPTTR pc2**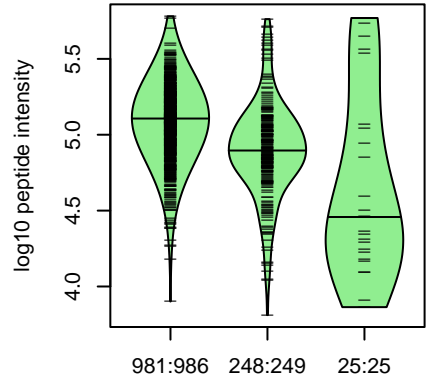

17:34306106:A:G\_G  
 $p = 8.6e-26$ ,  $\beta = -0.615$ ,  $N = 1254$

**ALNCHLPAIIFVTK pc3**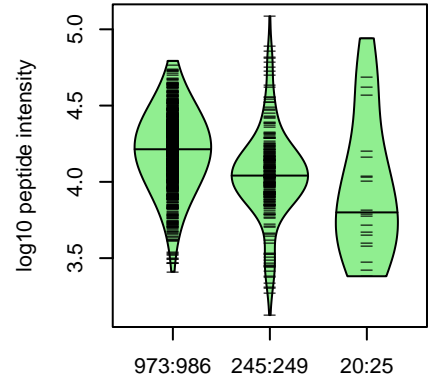

17:34306106:A:G\_G  
 $p = 2e-19$ ,  $\beta = -0.548$ ,  $N = 1238$

**VPEWVNTPTCCLK pc2**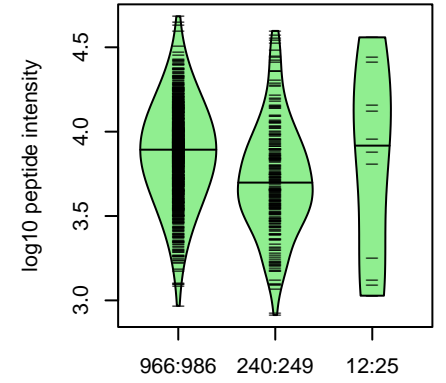

17:34306106:A:G\_G  
 $p = 3.5e-14$ ,  $\beta = -0.491$ ,  $N = 1218$

**EVCTNPNDWVQEYIK pc3**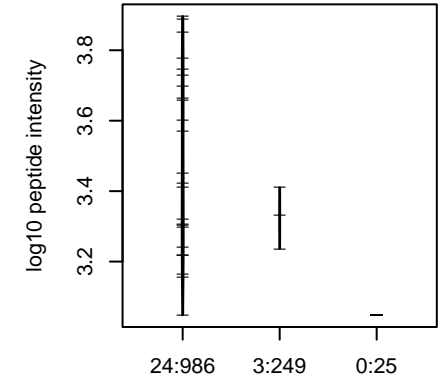

17:34306106:A:G\_G  
 $p = 0.76$ ,  $\beta = -0.174$ ,  $N = 27$

**O15467 NP3**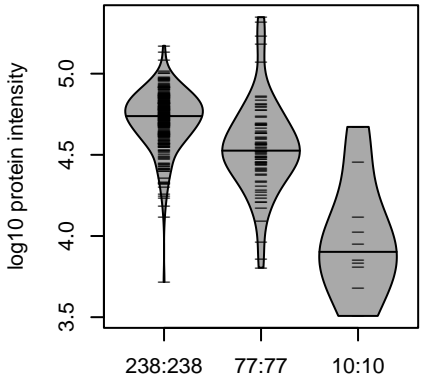

rs10445391  
 $p = 6.2e-17$ ,  $\beta = -0.84$ ,  $N = 325$

**ALNCHLPAIIFVTK pc3**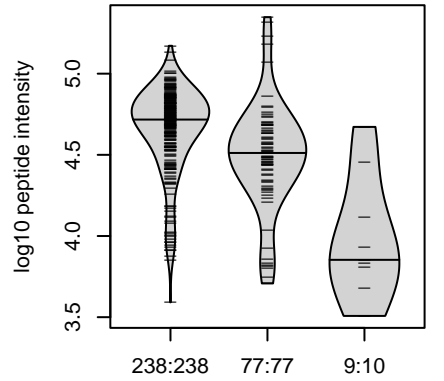

rs10445391  
 $p = 6.6e-12$ ,  $\beta = -0.709$ ,  $N = 324$

**DPNLPLLPTTR pc2**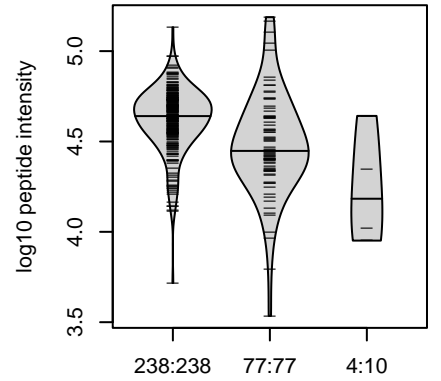

rs10445391  
 $p = 2e-08$ ,  $\beta = -0.645$ ,  $N = 319$

**VPEWVNTPTCCLK pc2**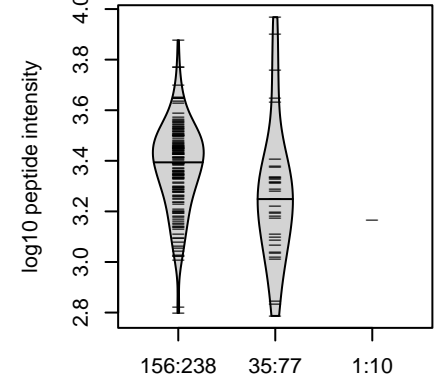

rs10445391  
 $p = 0.00069$ ,  $\beta = -0.582$ ,  $N = 192$

Locus: 55 (Sort: 66)  
 Status: Replicated  
 80% power: Yes  
 SNP: 17:34306106:A:G  
 rsID: rs10445391  
 UniProtID: O15467  
 HGNC gene: CCL16  
 Type: Cis-pQTL

**SERPINA10 [trans]**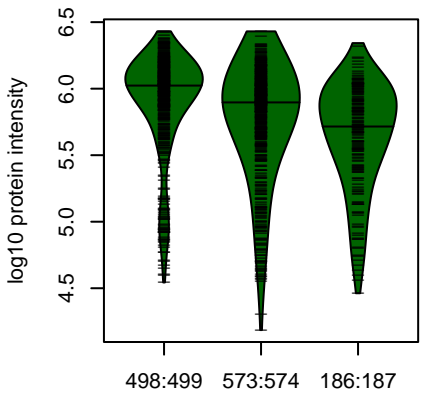

13:113800622:T:C\_T  
 $p = 3.1e-25$ ,  $\beta = -0.411$ ,  $N = 1257$

**LILVDYILFK pc2**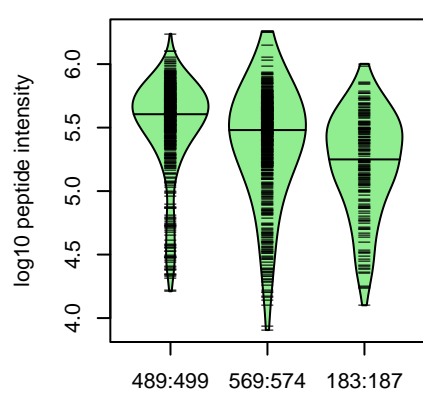

13:113800622:T:C\_T  
 $p = 8.9e-25$ ,  $\beta = -0.41$ ,  $N = 1241$

**VPMMYGAGK pc2**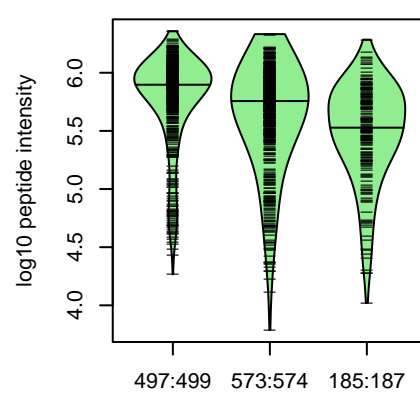

13:113800622:T:C\_T  
 $p = 4e-24$ ,  $\beta = -0.402$ ,  $N = 1255$

**ETSNFGFSLLR pc2**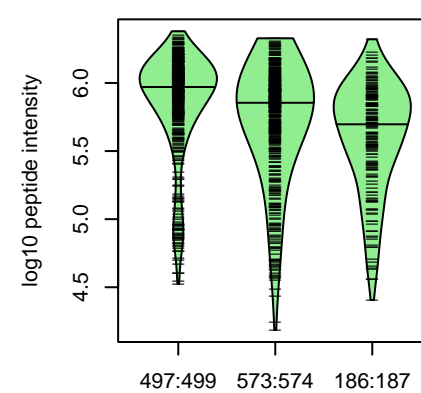

13:113800622:T:C\_T  
 $p = 1.4e-23$ ,  $\beta = -0.397$ ,  $N = 1256$

**YEMHELLR pc2**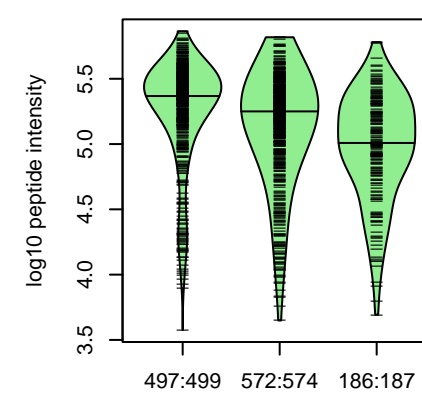

13:113800622:T:C\_T  
 $p = 2.2e-23$ ,  $\beta = -0.395$ ,  $N = 1255$

**G3V2W1 NP2**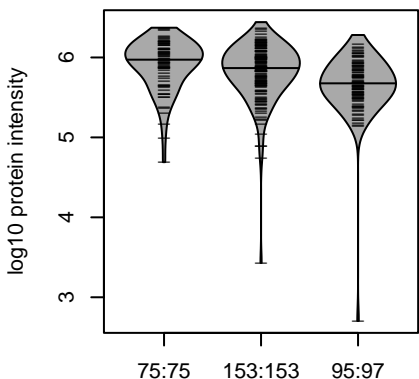

rs559054  
 $p = 1.5e-07$ ,  $\beta = -0.391$ ,  $N = 323$

**VPMMYGAGK pc2**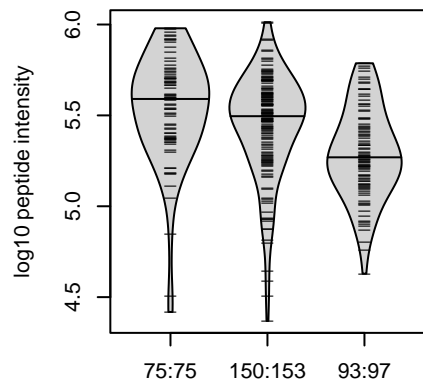

rs559054  
 $p = 8.6e-10$ ,  $\beta = -0.455$ ,  $N = 318$

**NMEVFFPK pc2**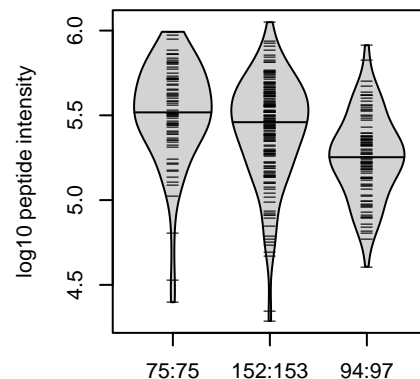

rs559054  
 $p = 2.4e-09$ ,  $\beta = -0.443$ ,  $N = 321$

**LILVDYILFK pc2**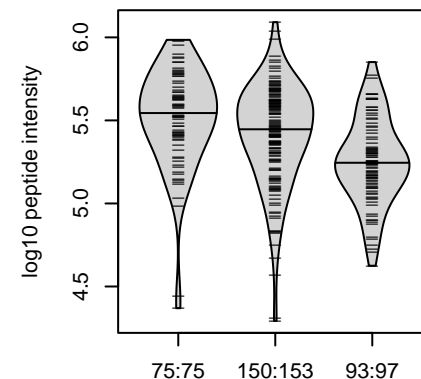

rs559054  
 $p = 2.9e-09$ ,  $\beta = -0.442$ ,  $N = 318$

**RIFSPFADLSELSATGR pc3**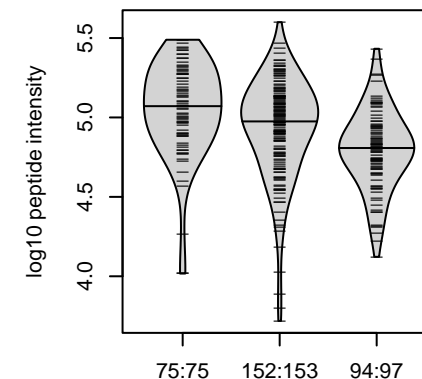

rs559054  
 $p = 7.9e-09$ ,  $\beta = -0.429$ ,  $N = 321$

Locus: 56 (Sort: 67)  
 Status: Replicated  
 80% power: Yes  
 SNP: 13:113800622:T:C  
 rsID: rs559054  
 UniProtID: G3V2W1  
 HGNC gene: SERPINA10  
 Type: Trans-pQTL

**NLELGLSQGSFAFIHK pc2  
rs2232700 ALT**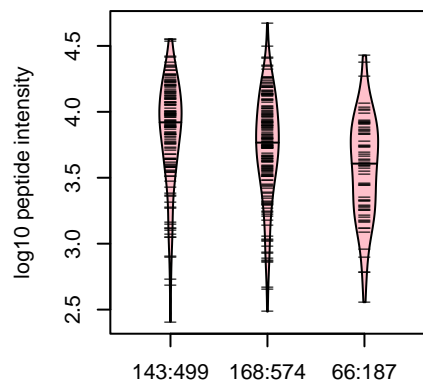

13:113800622:T:C\_T  
 $p = 0.084$ , model = DOM,  $N = 377$

**ETLSRNLELGLTQGSFAFIHK pc4  
rs2232700 REF**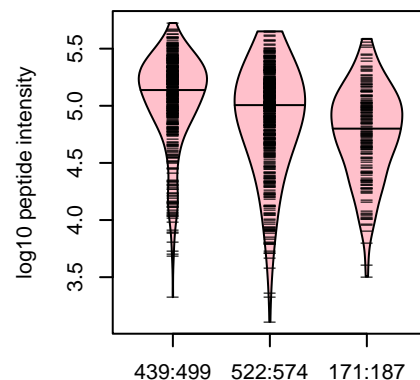

13:113800622:T:C\_T  
 $p = 0.086$ , model = REC,  $N = 1132$

**NLELGLTQGSFAFIHK pc2  
rs2232700 REF**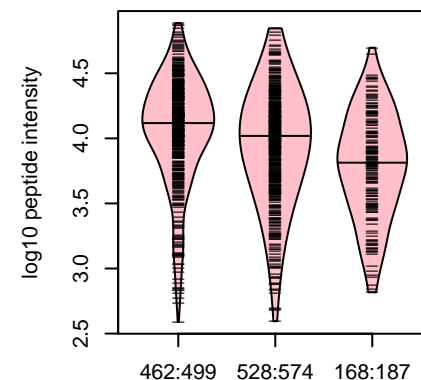

13:113800622:T:C\_T  
 $p = 0.25$ , model = DOM,  $N = 1158$

**PROZ [cis]**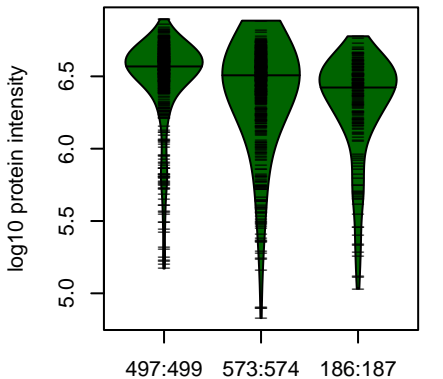

13:113800622:T:C\_T  
 $p = 6.1e-22$ ,  $\beta = -0.382$ ,  $N = 1256$

**DFAEHLIPR pc2**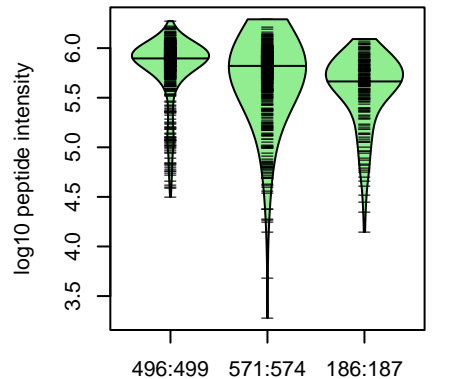

13:113800622:T:C\_T  
 $p = 1.5e-26$ ,  $\beta = -0.422$ ,  $N = 1253$

**RAPDLQDLPWQVK pc3**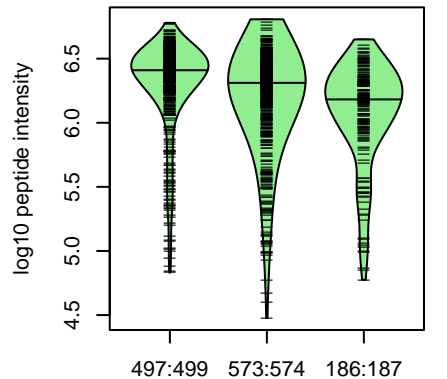

13:113800622:T:C\_T  
 $p = 1.1e-22$ ,  $\beta = -0.389$ ,  $N = 1256$

**DFCGVIIR pc2**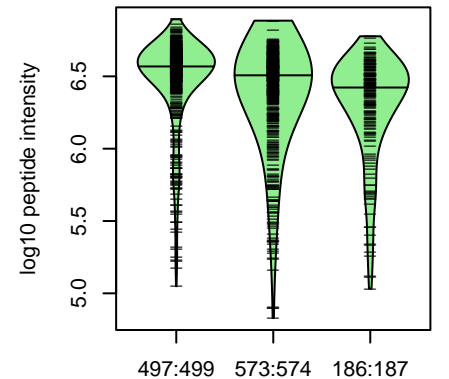

13:113800622:T:C\_T  
 $p = 6.9e-22$ ,  $\beta = -0.382$ ,  $N = 1256$

**NECHPER pc2**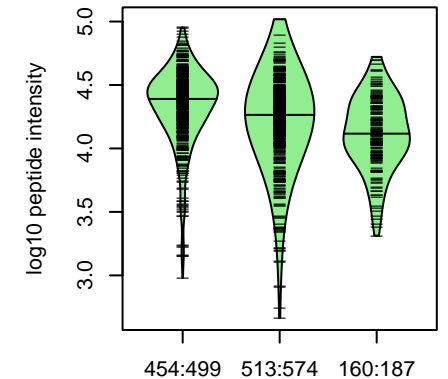

13:113800622:T:C\_T  
 $p = 4.3e-21$ ,  $\beta = -0.397$ ,  $N = 1127$

**P22891 NP2**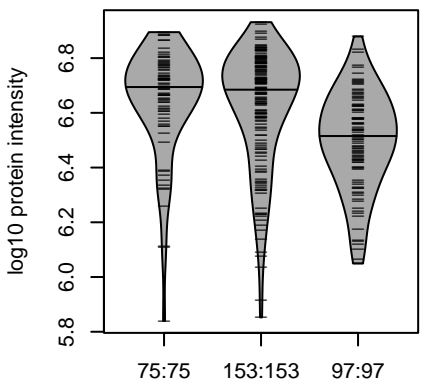

rs559054  
 $p = 2.1e-07$ ,  $\beta = -0.385$ ,  $N = 325$

**NECHPER pc2**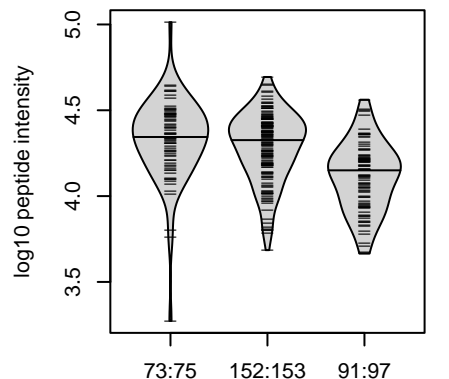

rs559054  
 $p = 1.3e-11$ ,  $\beta = -0.506$ ,  $N = 316$

**ITHVHVHMR pc2**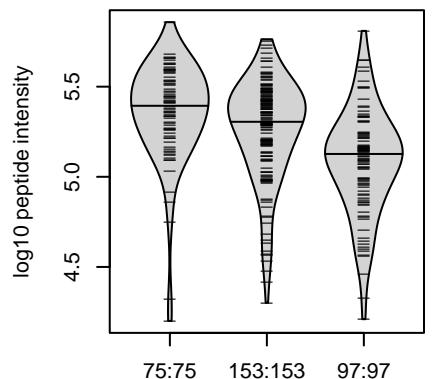

rs559054  
 $p = 1.6e-10$ ,  $\beta = -0.469$ ,  $N = 325$

**APDLQDLPWQVK pc2**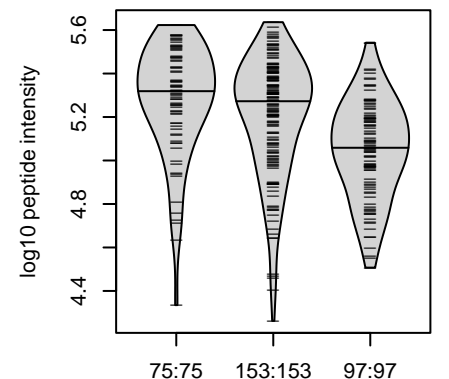

rs559054  
 $p = 1.3e-09$ ,  $\beta = -0.446$ ,  $N = 325$

**SSVAMHWMDGSVVTR pc2**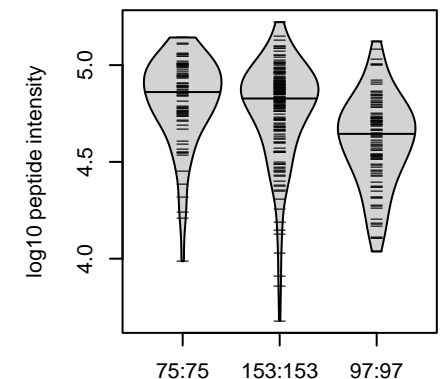

rs559054  
 $p = 1.8e-08$ ,  $\beta = -0.416$ ,  $N = 325$

Locus: 56 (Sort: 68)  
 Status: Replicated  
 80% power: Yes  
 SNP: 13:113800622:T:C  
 rsID: rs559054  
 UniProtID: P22891  
 HGNC gene: PROZ  
 Type: Cis-pQTL

**HLA-B [cis]**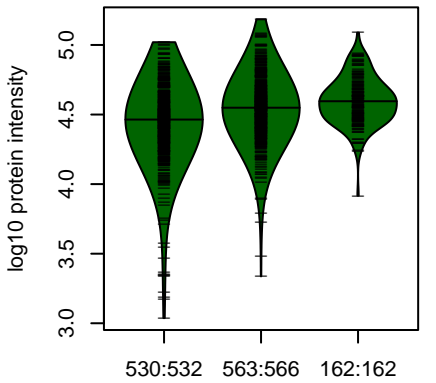

6:31221914:C:T\_C  
 $p = 3.6e-25$ ,  $\beta = 0.418$ ,  $N = 1255$

**SWTAADTAAQITQR pc2**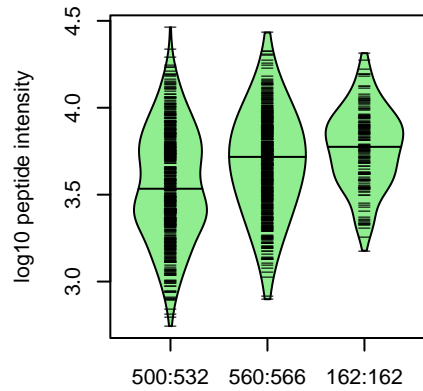

6:31221914:C:T\_C  
 $p = 3e-35$ ,  $\beta = 0.502$ ,  $N = 1222$

**FSDAASPR pc2**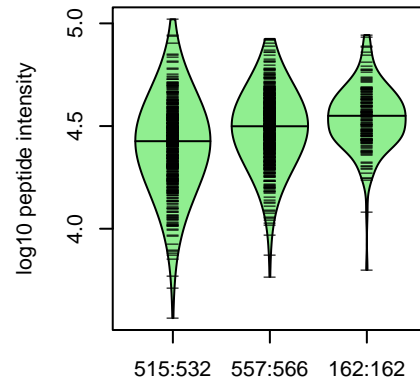

6:31221914:C:T\_C  
 $p = 1.9e-25$ ,  $\beta = 0.423$ ,  $N = 1234$

**DYIALNEDLR pc2**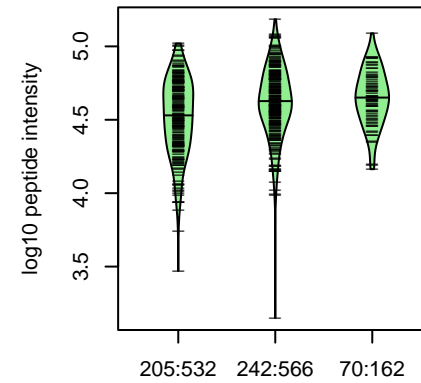

6:31221914:C:T\_C  
 $p = 1.4e-11$ ,  $\beta = 0.424$ ,  $N = 517$

**DGEDTQDTELVETRPAGDR pc3**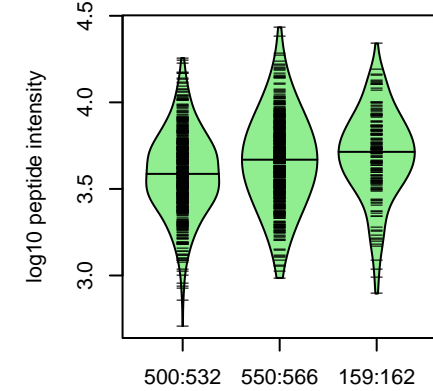

6:31221914:C:T\_C  
 $p = 1.7e-07$ ,  $\beta = 0.218$ ,  $N = 1209$

**P01889 NP2**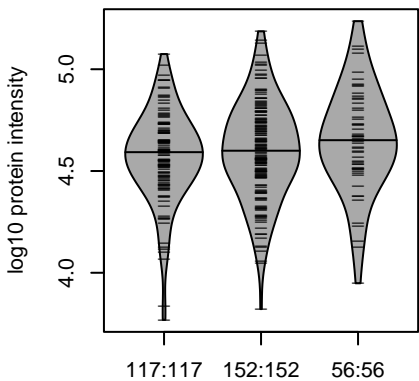

rs9264219  
 $p = 0.075$ ,  $\beta = 0.138$ ,  $N = 325$

**SWTAADTAAQITQR pc2**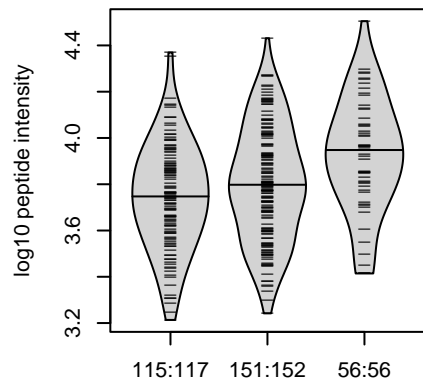

rs9264219  
 $p = 1e-05$ ,  $\beta = 0.34$ ,  $N = 322$

**APWIEQEGPEYWDR pc2**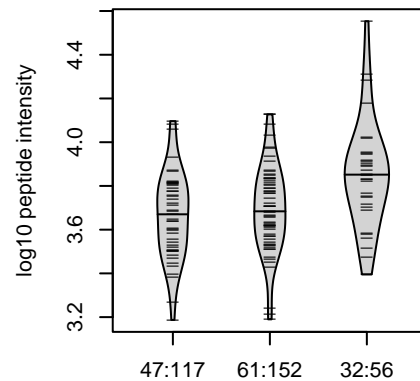

rs9264219  
 $p = 0.004$ ,  $\beta = 0.315$ ,  $N = 140$

**DGEDTQDTELVETRPAGDR pc3**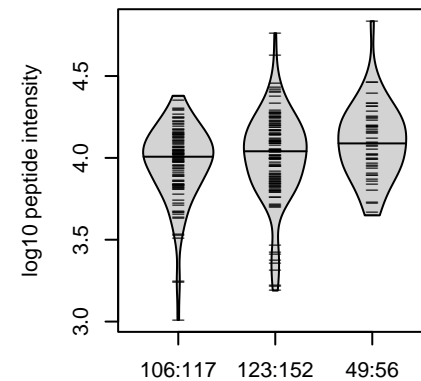

rs9264219  
 $p = 0.024$ ,  $\beta = 0.185$ ,  $N = 278$

**THVTHHPISDHEATLR pc4**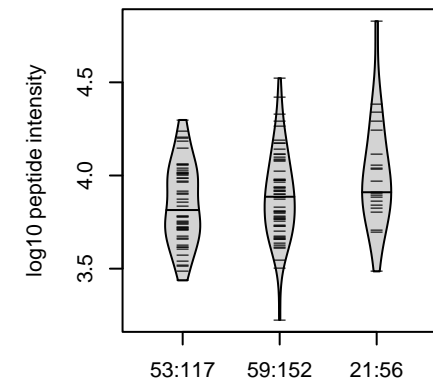

rs9264219  
 $p = 0.052$ ,  $\beta = 0.232$ ,  $N = 133$

**GEPRFISGVYDDTQFVR pc3  
rs1050437 REF**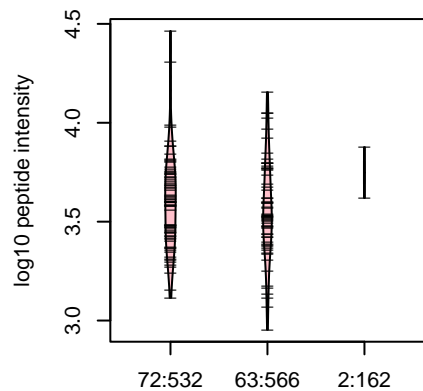

6:31221914:C:T\_C  
 $p = 1.1e-06$ ,  $\text{model} = \text{DOM}$ ,  $N = 137$

**FISGVYDDTQFVR pc2  
rs1050437 REF**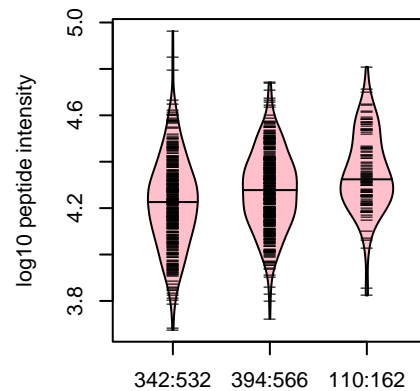

6:31221914:C:T\_C  
 $p = 0.069$ ,  $\text{model} = \text{REC}$ ,  $N = 846$

**WAAVVVPSGEEQR pc2  
rs707908;rs1736924 ALT**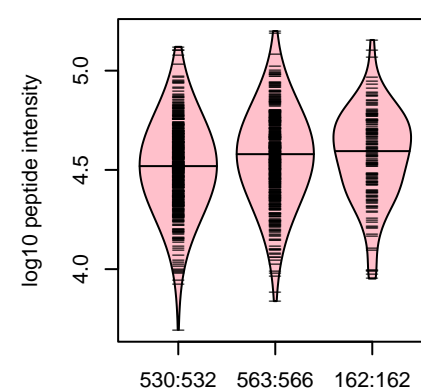

6:31221914:C:T\_C  
 $p = 1$ ,  $\text{model} = \text{DOM}$ ,  $N = 1255$

Locus: 57 (Sort: 69)  
 Status: Not replicated  
 80% power: Yes  
 SNP: 6:31221914:C:T  
 rsID: rs9264219  
 UniProtID: P01889  
 HGNC gene: HLA-B  
 Type: Cis-pQTL

**FXVD2 [cis]**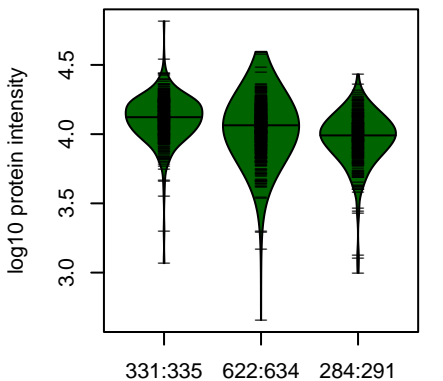

11:117694392:A:G\_G  
 $p = 6.7e-25$ ,  $\beta = -0.406$ ,  $N = 1237$

**TGLSMDGGGSPK pc2**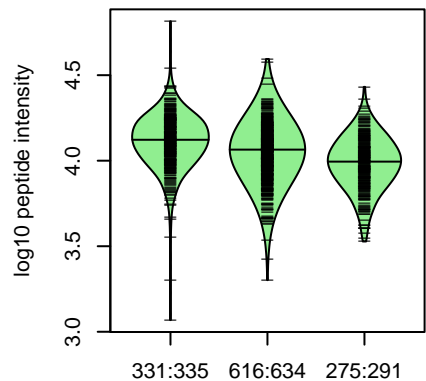

11:117694392:A:G\_G  
 $p = 6.5e-23$ ,  $\beta = -0.392$ ,  $N = 1222$

**GDVDPFYDYETVR pc2**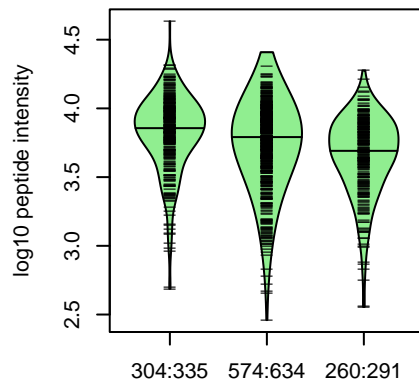

11:117694392:A:G\_G  
 $p = 8.6e-14$ ,  $\beta = -0.309$ ,  $N = 1138$

**P54710 NP2**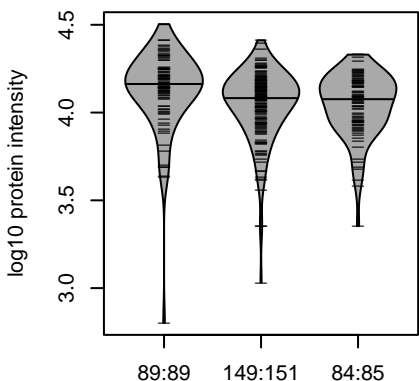

rs4936409  
 $p = 6.1e-07$ ,  $\beta = -0.365$ ,  $N = 322$

**GDVDPFYDYETVR pc2**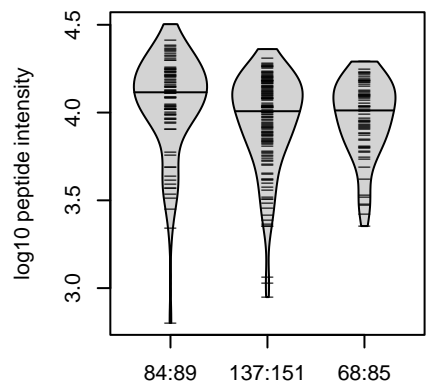

rs4936409  
 $p = 2.7e-05$ ,  $\beta = -0.332$ ,  $N = 289$

**TGLSMDGGGSPK pc2**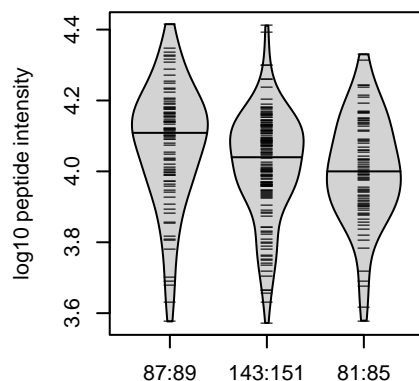

rs4936409  
 $p = 6.7e-05$ ,  $\beta = -0.3$ ,  $N = 311$

Locus: 58 (Sort: 70)  
 Status: Replicated  
 80% power: Yes  
 SNP: 11:117694392:A:G  
 rsID: rs4936409  
 UniProtID: P54710  
 HGNC gene: FXVD2  
 Type: Cis-pQTL

**BPIFA1 [cis]**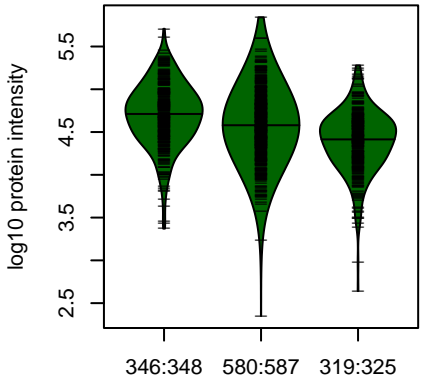

20:31828265:A:G\_G  
 $p = 1.3e-24$ ,  $\beta = -0.388$ ,  $N = 1245$

**LQVNTPLVGASLLR pc2**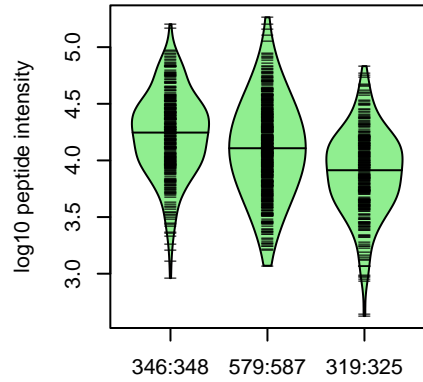

20:31828265:A:G\_G  
 $p = 2.5e-27$ ,  $\beta = -0.409$ ,  $N = 1244$

**LDITAEILAVR pc2**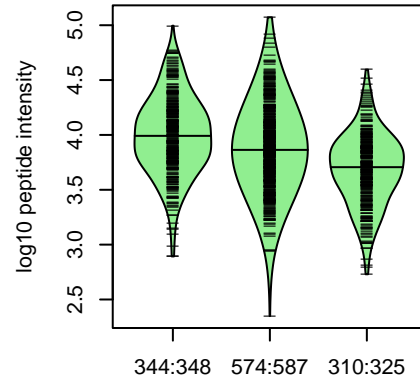

20:31828265:A:G\_G  
 $p = 4e-25$ ,  $\beta = -0.395$ ,  $N = 1228$

**LYVTIPLGIK pc2**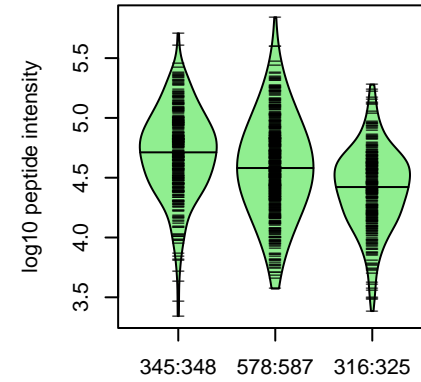

20:31828265:A:G\_G  
 $p = 2.3e-24$ ,  $\beta = -0.387$ ,  $N = 1239$

**VTDPQLLELGLVQSPDGHR pc3**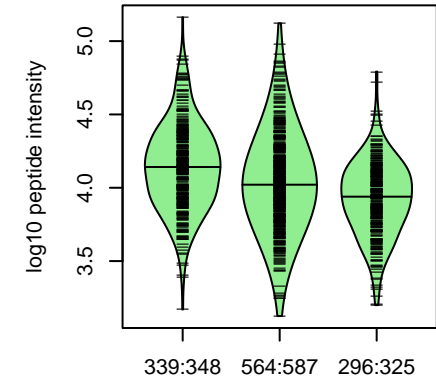

20:31828265:A:G\_G  
 $p = 4.8e-19$ ,  $\beta = -0.347$ ,  $N = 1199$

**Q9NP55 NP1**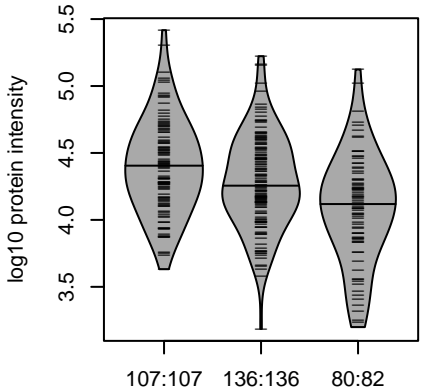

rs6059187  
 $p = 1.3e-07$ ,  $\beta = -0.377$ ,  $N = 323$

**LQVNTPLVGASLLR pc2**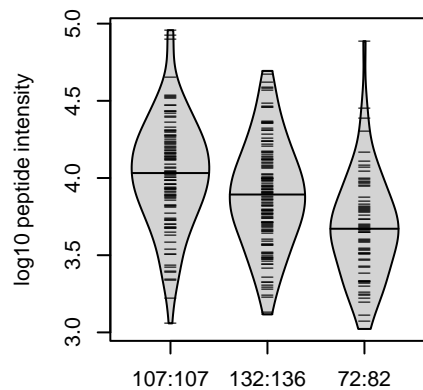

rs6059187  
 $p = 1.6e-10$ ,  $\beta = -0.462$ ,  $N = 311$

**LDITAEILAVR pc2**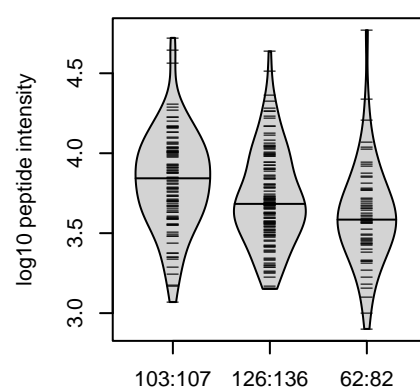

rs6059187  
 $p = 2.5e-06$ ,  $\beta = -0.362$ ,  $N = 291$

**LYVTIPLGIK pc2**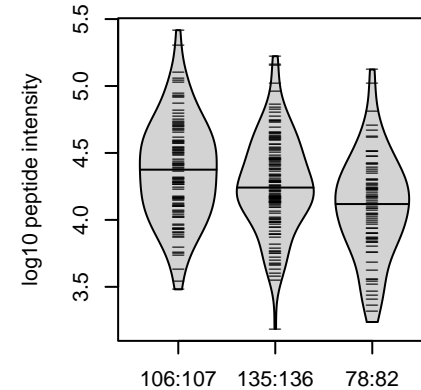

rs6059187  
 $p = 4e-06$ ,  $\beta = -0.333$ ,  $N = 319$

**VTDPQLLELGLVQSPDGHR pc3**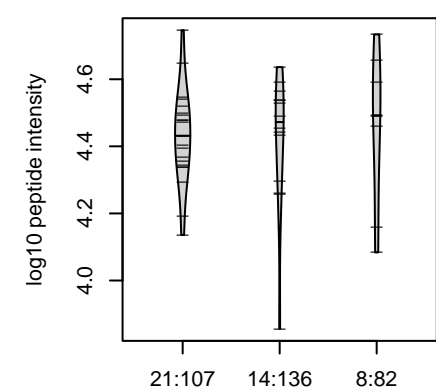

rs6059187  
 $p = 0.69$ ,  $\beta = 0.076$ ,  $N = 43$

Locus: 59 (Sort: 71)  
 Status: Replicated  
 80% power: Yes  
 SNP: 20:31828265:A:G  
 rsID: rs6059187  
 UniProtID: Q9NP55  
 HGNC gene: BPIFA1  
 Type: Cis-pQTL

**ZNF618 [trans]**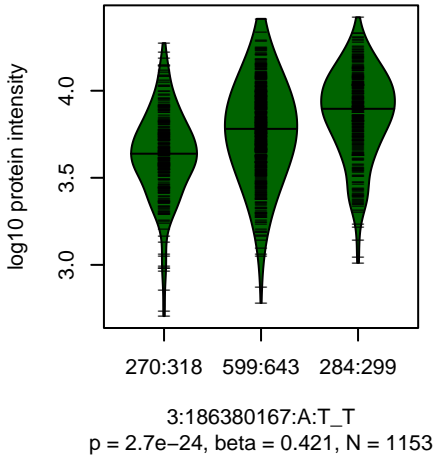**RLLSPEDMNK pc2**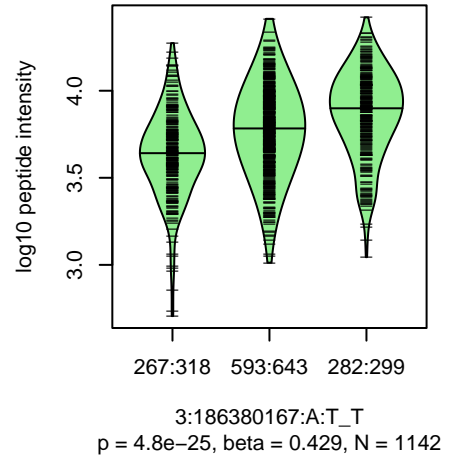**ADPFDQGVVATDEVK pc2**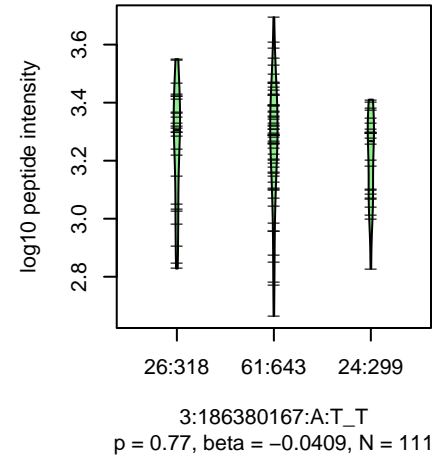**Q5T7W0 NP1**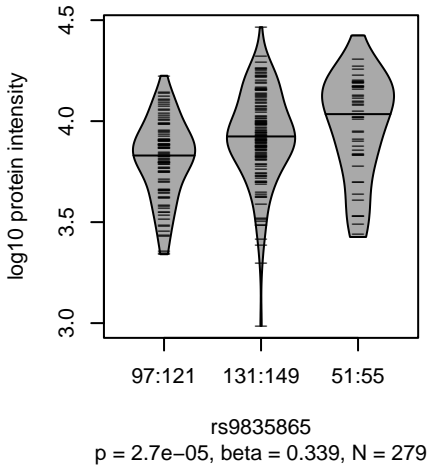**RLLSPEDMNK pc2**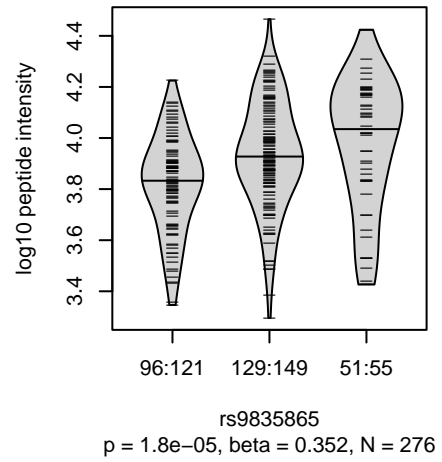**ADPFDQGVVATDEVK pc2**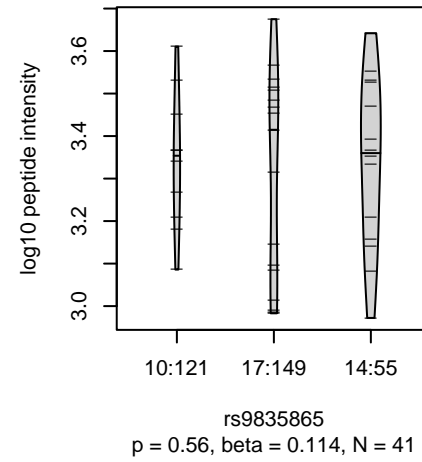

Locus: 60 (Sort: 72)  
 Status: Replicated  
 80% power: Yes  
 SNP: 3:186380167:A:T  
 rsID: rs9835865  
 UniProtID: Q5T7W0  
 HGNC gene: ZNF618  
 Type: Trans-pQTL



**IGHV2-70 [cis]**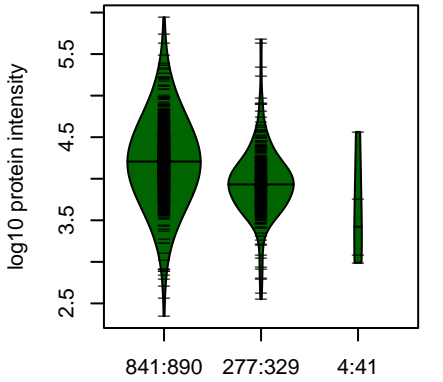

14:107187473:G:A\_A  
 $p = 6.4e-24$ ,  $\beta = -0.661$ ,  $N = 1122$

**YYTSLK pc2**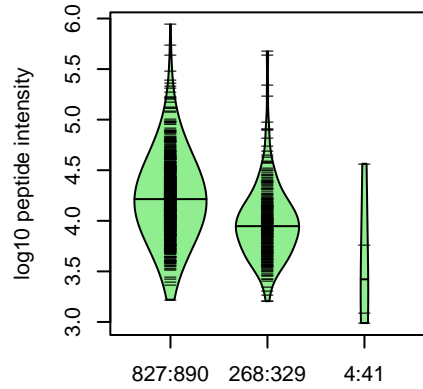

14:107187473:G:A\_A  
 $p = 1.6e-25$ ,  $\beta = -0.692$ ,  $N = 1099$

**ALEWLALIDWDDDK pc2**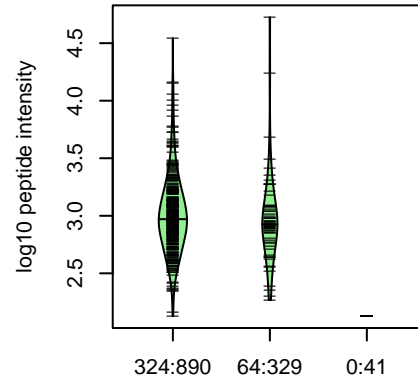

14:107187473:G:A\_A  
 $p = 0.23$ ,  $\beta = -0.164$ ,  $N = 388$

**ESGPALVK pc2**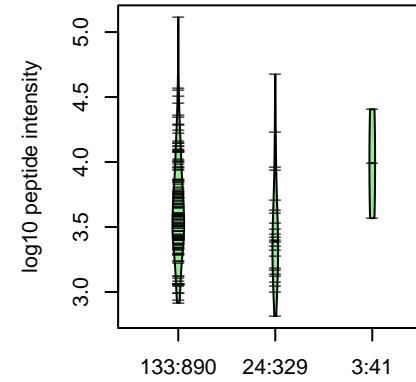

14:107187473:G:A\_A  
 $p = 0.3$ ,  $\beta = -0.184$ ,  $N = 160$

**NQVVLMTNMDPVDTATYYCAR pc2**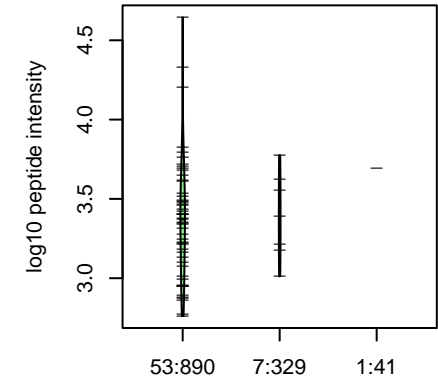

14:107187473:G:A\_A  
 $p = 0.38$ ,  $\beta = 0.268$ ,  $N = 61$

**P01814 NP3**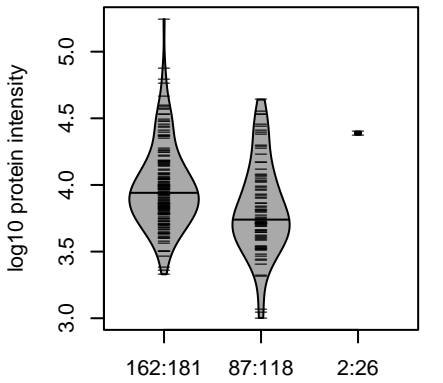

rs74092511  
 $p = 0.00067$ ,  $\beta = -0.427$ ,  $N = 251$

**YYTSLK pc2**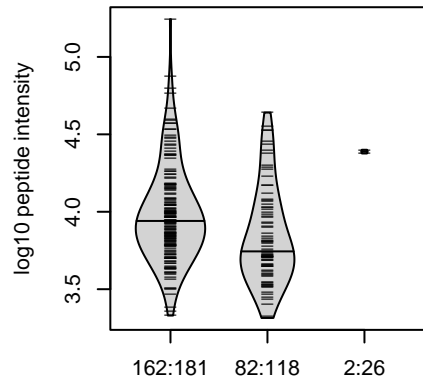

rs74092511  
 $p = 0.0053$ ,  $\beta = -0.352$ ,  $N = 246$

**ESGPALVK pc2**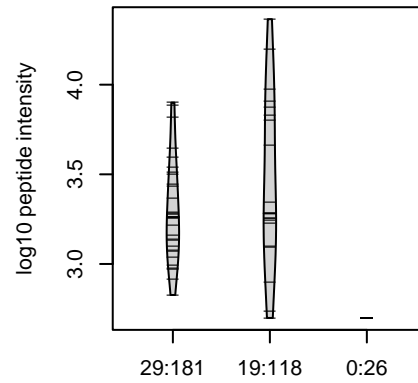

rs74092511  
 $p = 0.51$ ,  $\beta = 0.187$ ,  $N = 48$

**ALEWLALIDWDDDK pc2**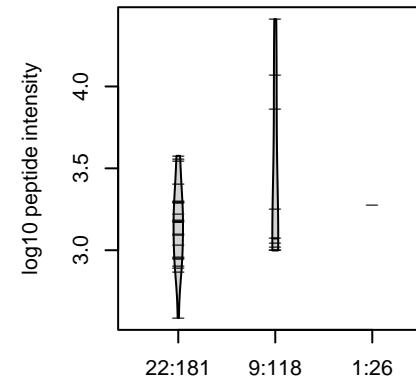

rs74092511  
 $p = 0.88$ ,  $\beta = -0.0478$ ,  $N = 32$

Locus: 61 (Sort: 73)  
 Status: Not replicated  
 80% power: Yes  
 SNP: 14:107187473:G:A  
 rsID: rs74092511  
 UniProtID: P01814  
 HGNC gene: IGHV2-70  
 Type: Cis-pQTL

**MSN [trans]**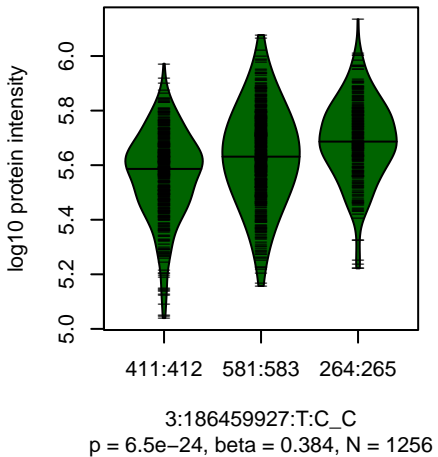**IAQDLEMYGVNYFSIK pc2**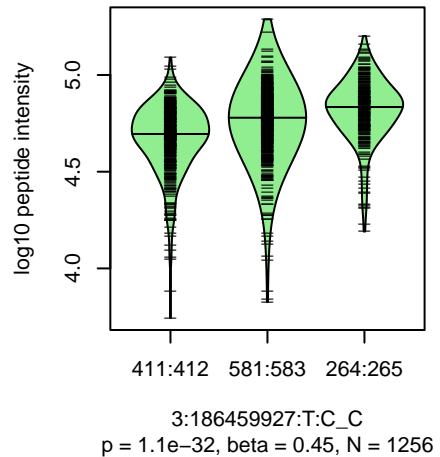**FYPEDVSEELIQDITQR pc3**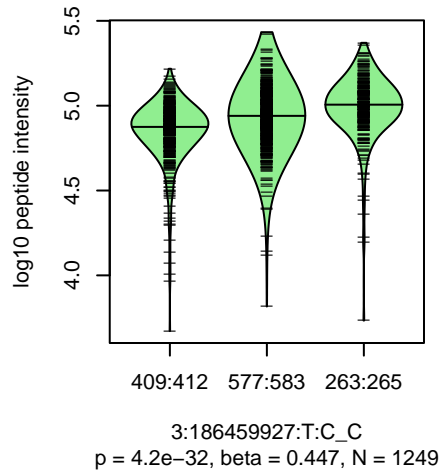**SGYLAGDK pc2**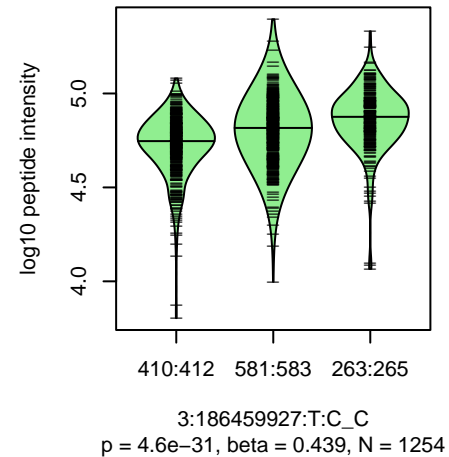**GMLREDAVLEYLK pc3**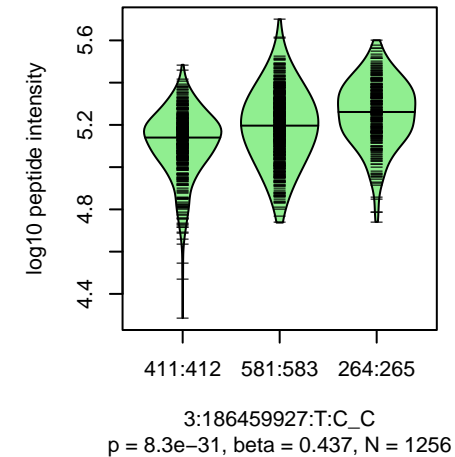**P26038 NP1**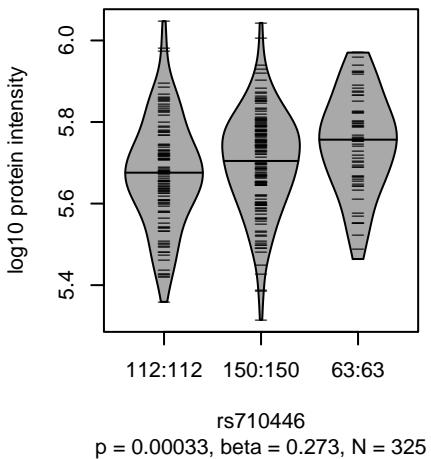**IQVWHEEHR pc3**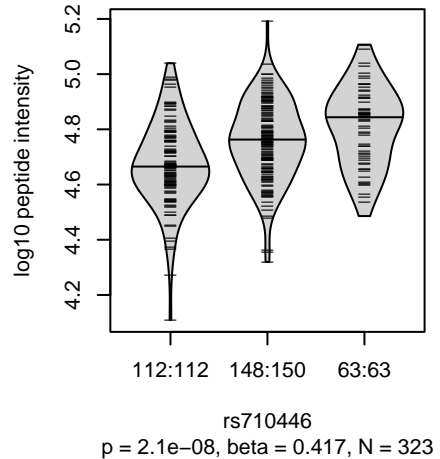**IGFPWSEIR pc2**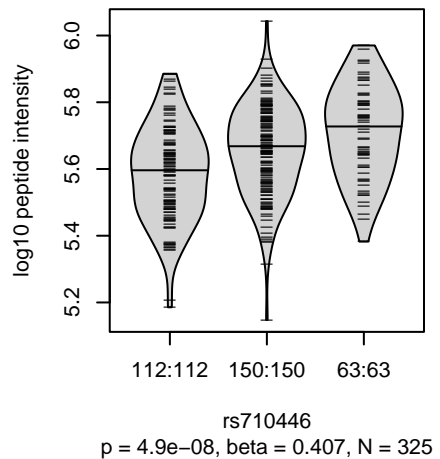**ILALCMGNHELYMR pc3**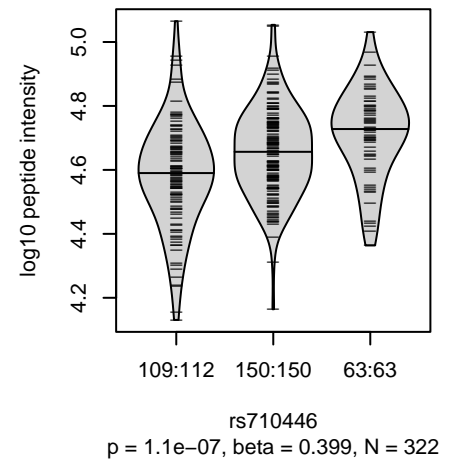**APDFVFYAPR pc2**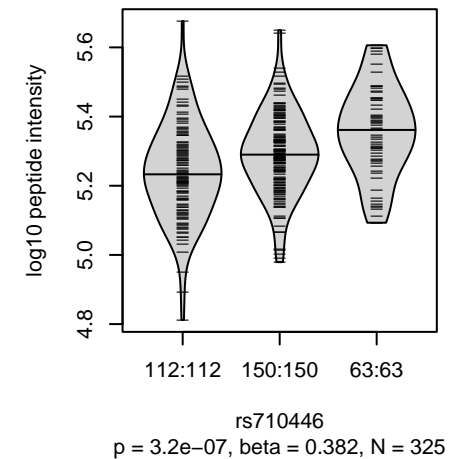

Locus: 62 (Sort: 74)  
 Status: Not replicated  
 80% power: Yes  
 SNP: 3:186459927:T:C  
 rsID: rs710446  
 UniProtID: P26038  
 HGNC gene: MSN  
 Type: Trans-pQTL

**ITIH4 [trans]**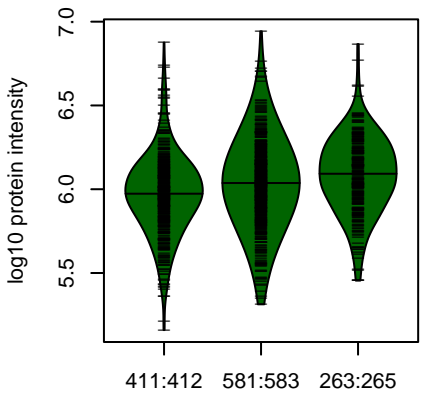

3:186459927:T:C\_C  
 $p = 4e-13$ ,  $\beta = 0.279$ ,  $N = 1255$

**YYLQGAK pc2**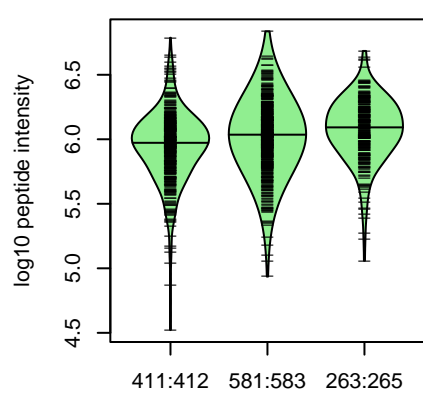

3:186459927:T:C\_C  
 $p = 5.7e-14$ ,  $\beta = 0.289$ ,  $N = 1255$

**NVHSGSTFFK pc2**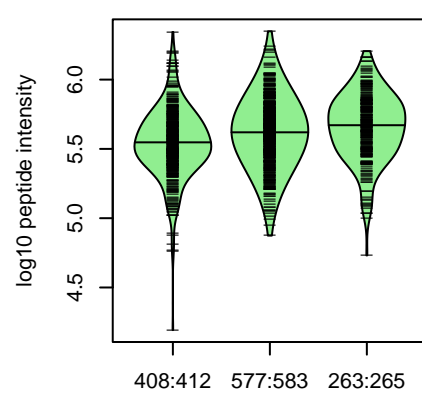

3:186459927:T:C\_C  
 $p = 2.4e-12$ ,  $\beta = 0.27$ ,  $N = 1248$

**IPKPEASFSPR pc3**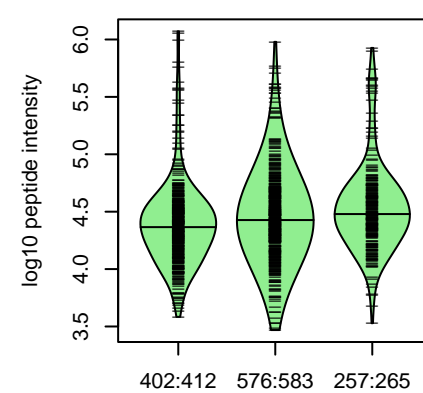

3:186459927:T:C\_C  
 $p = 1.7e-08$ ,  $\beta = 0.22$ ,  $N = 1235$

**PEASFSPR pc2**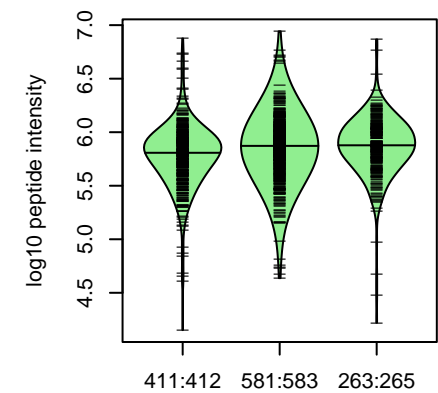

3:186459927:T:C\_C  
 $p = 7.6e-07$ ,  $\beta = 0.191$ ,  $N = 1255$

**Q14624 NP3**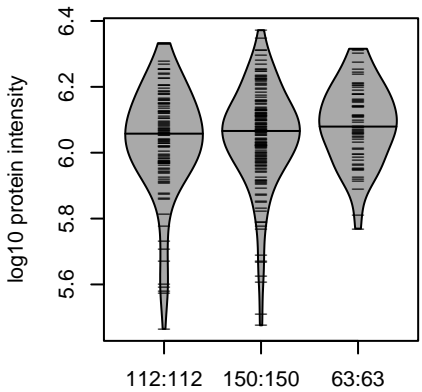

rs710446  
 $p = 0.067$ ,  $\beta = 0.142$ ,  $N = 325$

**NVHSGSTFFK pc2**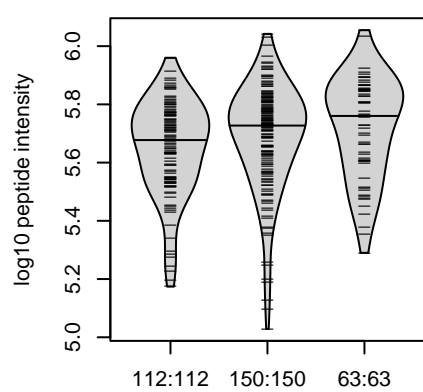

rs710446  
 $p = 0.00099$ ,  $\beta = 0.249$ ,  $N = 325$

**AEAQAQYSAAVAK pc2**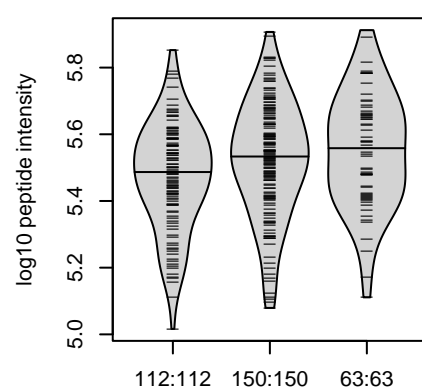

rs710446  
 $p = 0.0013$ ,  $\beta = 0.243$ ,  $N = 325$

**PTLSQQQK pc2**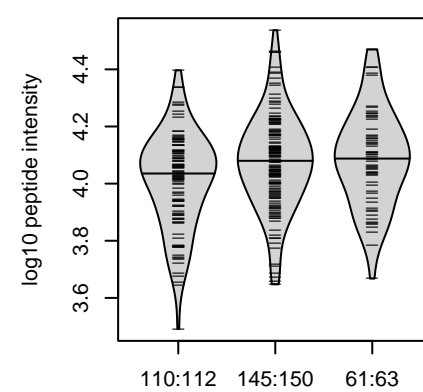

rs710446  
 $p = 0.0037$ ,  $\beta = 0.223$ ,  $N = 316$

**FAHTVVTSR pc2**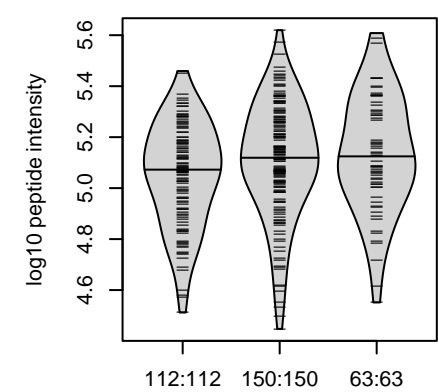

rs710446  
 $p = 0.0057$ ,  $\beta = 0.21$ ,  $N = 325$

**LLGLPAPPDVPDHAAYHPFRR pc4  
rs2276814 ALT**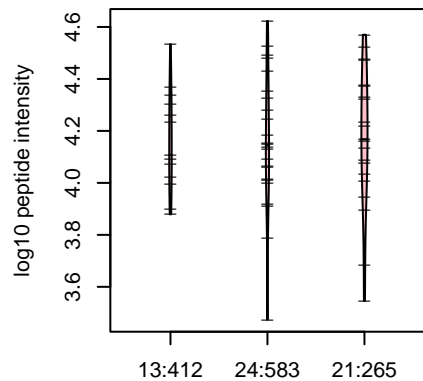

3:186459927:T:C\_C  
 $p = 0.0074$ , model = DOM,  $N = 58$

**LLGLPAPPDVPDHAAYHPFRR pc4  
rs2276814 ALT**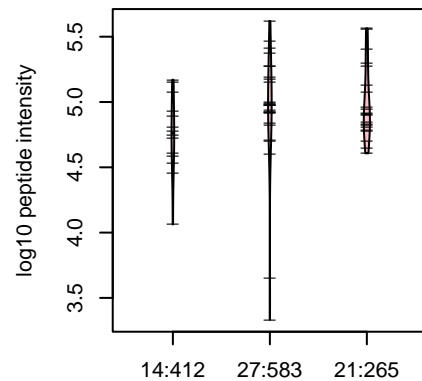

3:186459927:T:C\_C  
 $p = 0.016$ , model = DOM,  $N = 62$

**AFITNFSMIIDGMTYPGIIK pc3  
rs13072536 REF**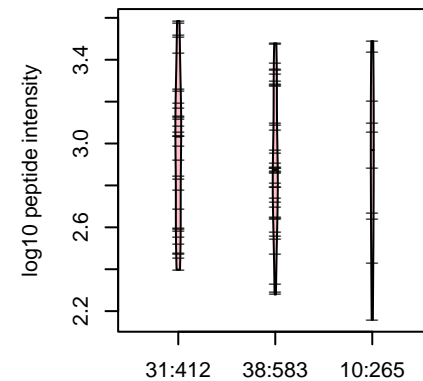

3:186459927:T:C\_C  
 $p = 0.064$ , model = DOM,  $N = 79$

**AFITNFSMNIDGMTYPGIIK pc3  
rs13072536 ALT**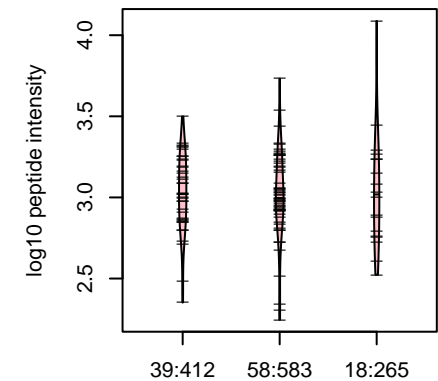

3:186459927:T:C\_C  
 $p = 0.15$ , model = DOM,  $N = 115$

Locus: 62 (Sort: 75)  
 Status: Not replicated  
 80% power: No  
 SNP: 3:186459927:T:C  
 rsID: rs710446  
 UniProtID: Q14624  
 HGNC gene: ITIH4  
 Type: Trans-pQTL

**ITIH4 [trans]**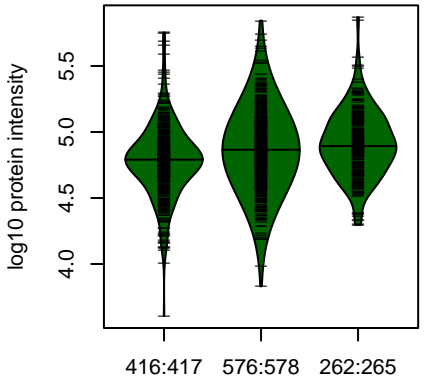

416:417 576:578 262:265  
3:186459227:A:G\_G  
 $p = 1.3e-12$ ,  $\beta = 0.272$ ,  $N = 1254$

**YYLQGAK pc2**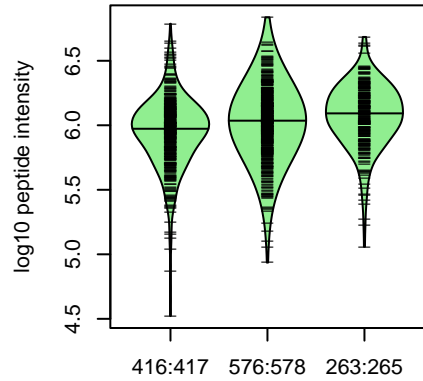

416:417 576:578 263:265  
3:186459227:A:G\_G  
 $p = 6.3e-14$ ,  $\beta = 0.288$ ,  $N = 1255$

**NVHSGSTFFK pc2**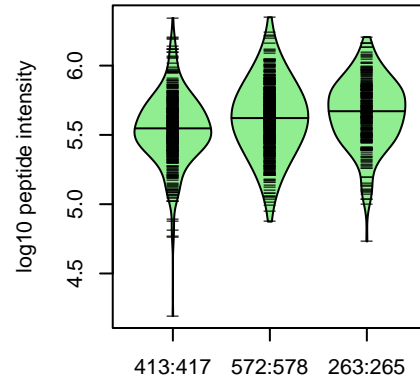

413:417 572:578 263:265  
3:186459227:A:G\_G  
 $p = 1.9e-12$ ,  $\beta = 0.271$ ,  $N = 1248$

**PGLDHTTEASFSPR pc3**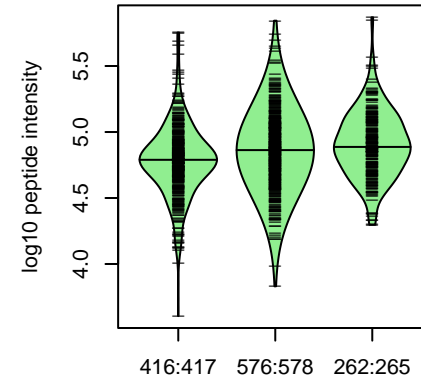

416:417 576:578 262:265  
3:186459227:A:G\_G  
 $p = 2.3e-12$ ,  $\beta = 0.27$ ,  $N = 1254$

**ANTVQEATFQMELPK pc2**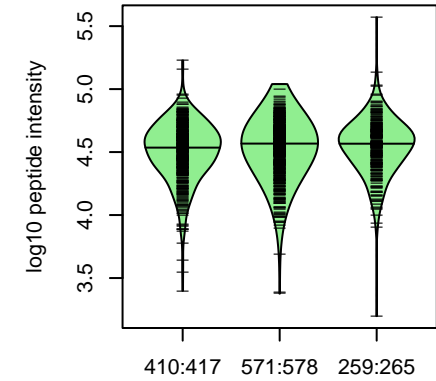

410:417 571:578 259:265  
3:186459227:A:G\_G  
 $p = 0.0091$ ,  $\beta = 0.102$ ,  $N = 1240$

**B7ZKJ8 NP3**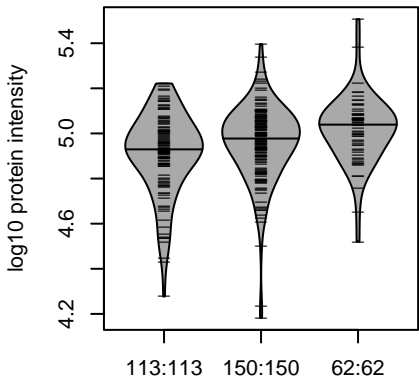

113:113 150:150 62:62  
rs698078  
 $p = 2.5e-05$ ,  $\beta = 0.321$ ,  $N = 325$

**PGLDHTTEASFSPR pc3**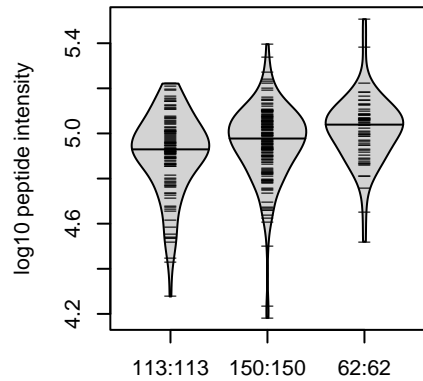

113:113 150:150 62:62  
rs698078  
 $p = 3.1e-05$ ,  $\beta = 0.314$ ,  $N = 325$

**NVHSGSTFFK pc2**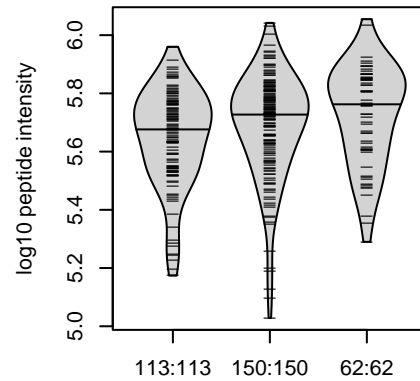

113:113 150:150 62:62  
rs698078  
 $p = 4e-04$ ,  $\beta = 0.268$ ,  $N = 325$

**AEAQAQYSAAVAK pc2**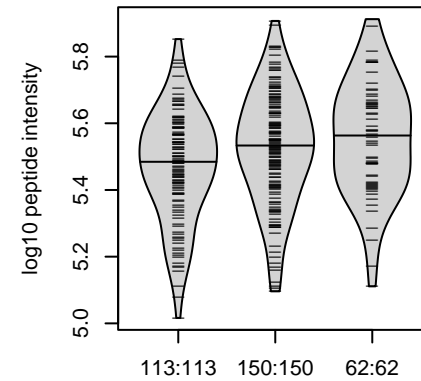

113:113 150:150 62:62  
rs698078  
 $p = 0.00056$ ,  $\beta = 0.262$ ,  $N = 325$

**PTLSQQQK pc2**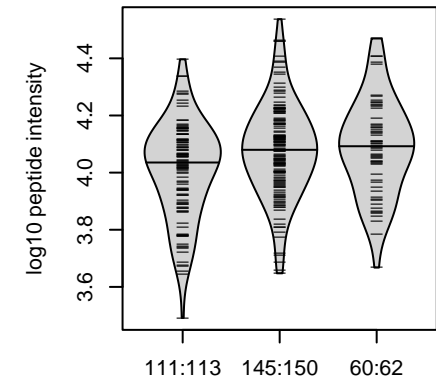

111:113 145:150 60:62  
rs698078  
 $p = 0.002$ ,  $\beta = 0.237$ ,  $N = 316$

**LLGLPAPPDVPDHAAYHPFR pc4  
rs2276814 ALT**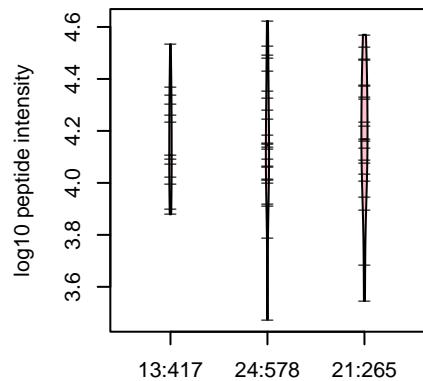

13:417 24:578 21:265  
3:186459227:A:G\_G  
 $p = 0.0074$ ,  $\text{model} = \text{DOM}$ ,  $N = 58$

**LLGLPAPPDVPDHAAYHPFR pc4  
rs2276814 ALT**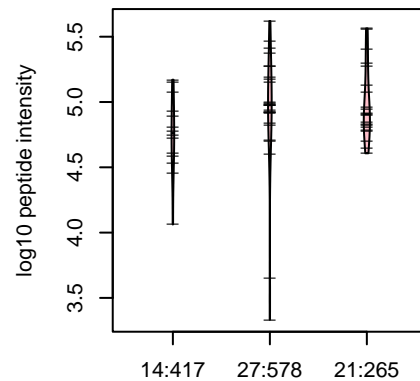

14:417 27:578 21:265  
3:186459227:A:G\_G  
 $p = 0.016$ ,  $\text{model} = \text{DOM}$ ,  $N = 62$

**AFITNFSMIIDGMTYPGIIK pc3  
rs13072536 REF**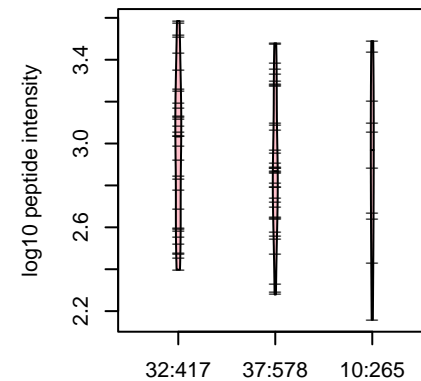

32:417 37:578 10:265  
3:186459227:A:G\_G  
 $p = 0.064$ ,  $\text{model} = \text{DOM}$ ,  $N = 79$

**AFITNFSMNIDGMTYPGIIK pc3  
rs13072536 ALT**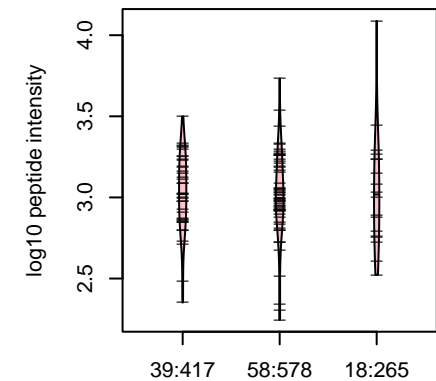

39:417 58:578 18:265  
3:186459227:A:G\_G  
 $p = 0.15$ ,  $\text{model} = \text{DOM}$ ,  $N = 115$

Locus: 62 (Sort: 76)  
Status: Replicated  
80% power: No  
SNP: 3:186459227:A:G  
rsID: rs698078  
UniProtID: B7ZKJ8  
HGNC gene: ITIH4  
Type: Trans-pQTL

**SFTPD [cis]**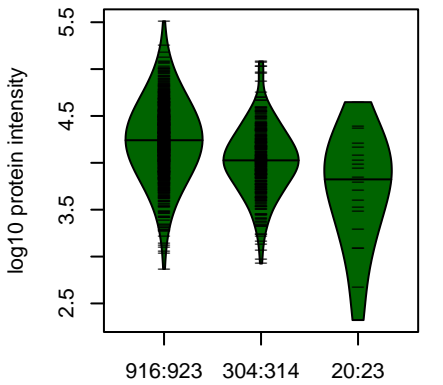

10:81679949:G:A\_A  
 $p = 1.9e-23$ ,  $\beta = -0.573$ ,  $N = 1240$

**SAAENAALQQLVVAK pc2**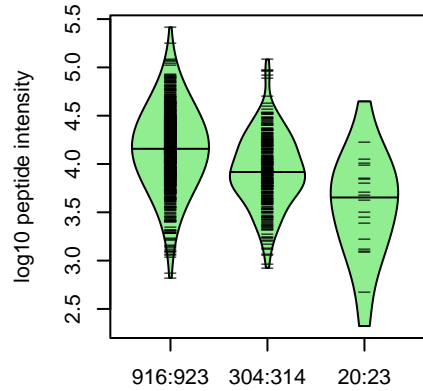

10:81679949:G:A\_A  
 $p = 2.1e-24$ ,  $\beta = -0.585$ ,  $N = 1240$

**NEAFLSMTDSK pc2**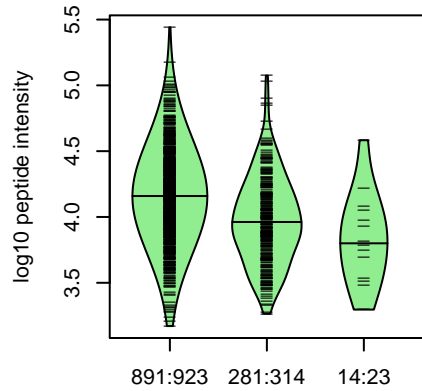

10:81679949:G:A\_A  
 $p = 1.2e-16$ ,  $\beta = -0.508$ ,  $N = 1186$

**KVELFPNGQSVGEK pc3**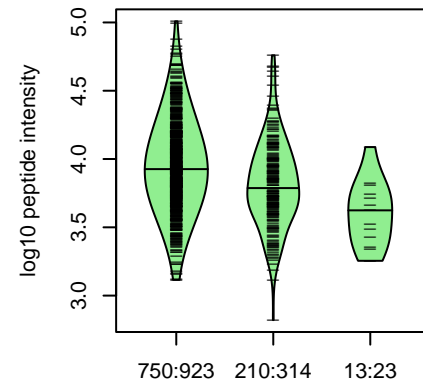

10:81679949:G:A\_A  
 $p = 1.1e-11$ ,  $\beta = -0.467$ ,  $N = 973$

**QGNIGPQGK pc2**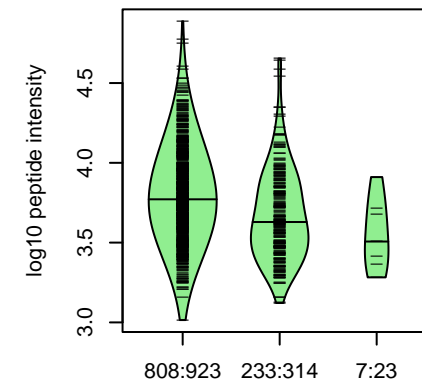

10:81679949:G:A\_A  
 $p = 4.4e-11$ ,  $\beta = -0.456$ ,  $N = 1048$

**P35247 NP5**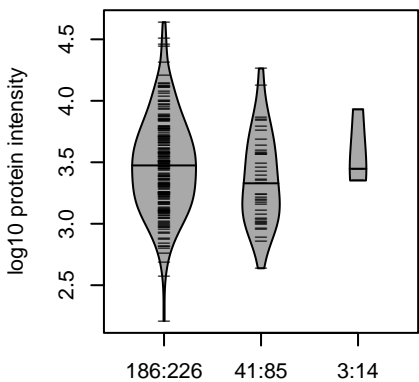

rs45558131  
 $p = 0.037$ ,  $\beta = -0.314$ ,  $N = 230$

**SAAENAALQQLVVAK pc2**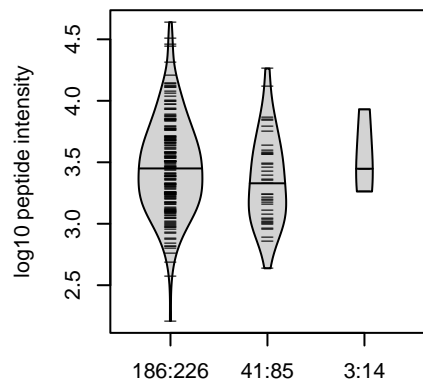

rs45558131  
 $p = 0.033$ ,  $\beta = -0.318$ ,  $N = 230$

**NEAFLSMTDSK pc2**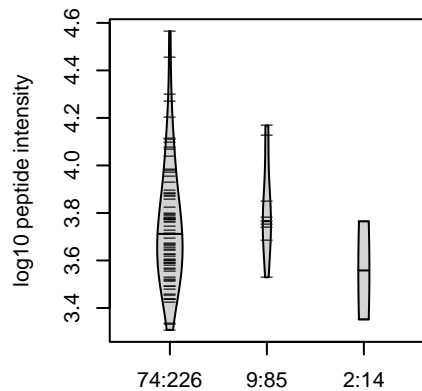

rs45558131  
 $p = 0.54$ ,  $\beta = -0.154$ ,  $N = 85$

**PFTEAQLLCTQAGGQLATPR pc3  
rs3088308 ALT**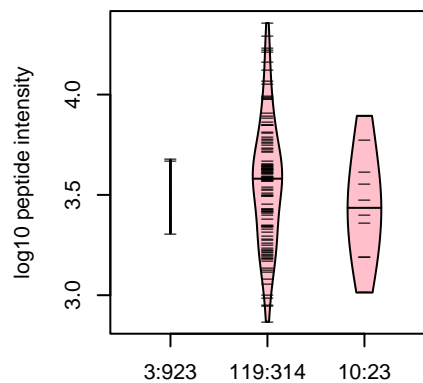

10:81679949:G:A\_A  
 $p = 1.1e-78$ ,  $\text{model} = \text{REC}$ ,  $N = 132$

**PFTEAQLLCTQAGGQLASPR pc3  
rs3088308 REF**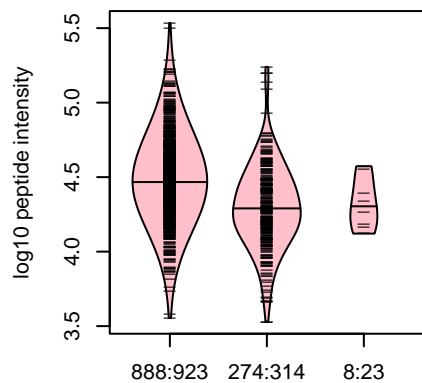

10:81679949:G:A\_A  
 $p = 6.3e-13$ ,  $\text{model} = \text{DOM}$ ,  $N = 1170$

Locus: 64 (Sort: 78)  
 Status: Not replicated  
 80% power: No  
 SNP: 10:81679949:G:A  
 rsID: rs45558131  
 UniProtID: P35247  
 HGNC gene: SFTPD  
 Type: Cis-pQTL

**ANXA5 [cis]**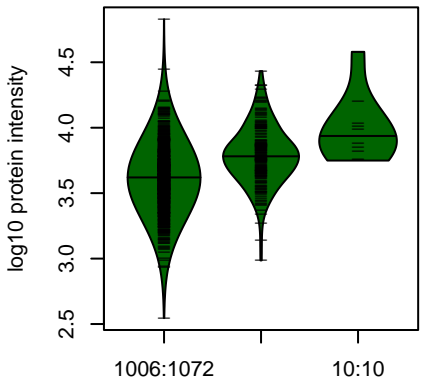

4:122615760:G:A\_A  
 $p = 2.6e-23$ ,  $\beta = 0.718$ ,  $N = 1190$

**FITIFGTR pc2**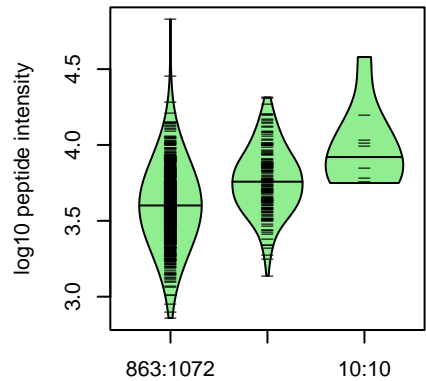

4:122615760:G:A\_A  
 $p = 3.3e-19$ ,  $\beta = 0.672$ ,  $N = 1034$

**GTVTDFPGFDER pc2**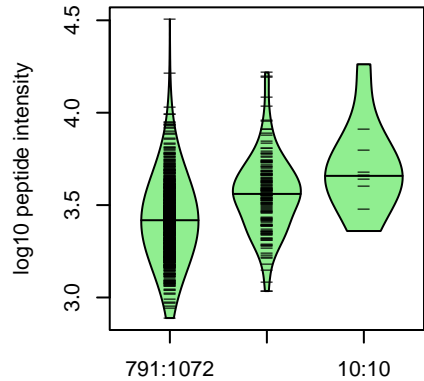

4:122615760:G:A\_A  
 $p = 3.1e-15$ ,  $\beta = 0.604$ ,  $N = 957$

**SEIDLFNIR pc2**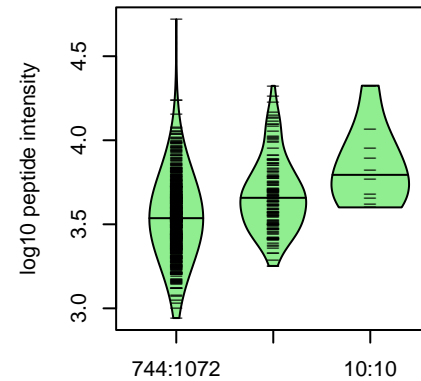

4:122615760:G:A\_A  
 $p = 1.6e-12$ ,  $\beta = 0.55$ ,  $N = 905$

**NFATSLYSMIK pc2**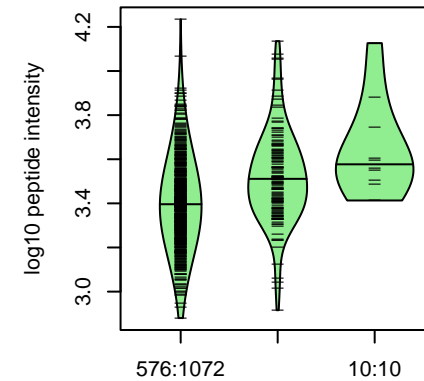

4:122615760:G:A\_A  
 $p = 1e-10$ ,  $\beta = 0.532$ ,  $N = 721$

**P08758 NP1**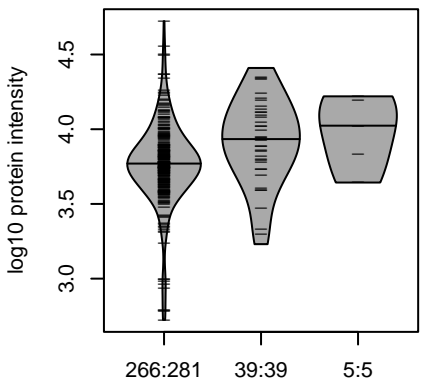

rs9995591  
 $p = 0.00047$ ,  $\beta = 0.474$ ,  $N = 310$

**FITIFGTR pc2**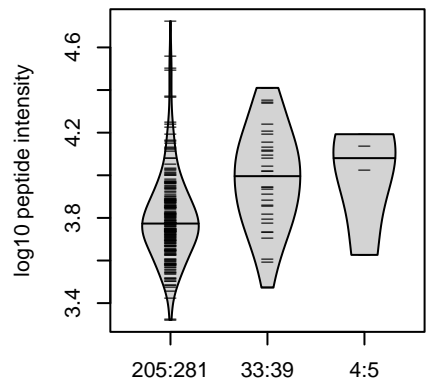

rs9995591  
 $p = 0.00012$ ,  $\beta = 0.575$ ,  $N = 242$

**GTVTDFPGFDER pc2**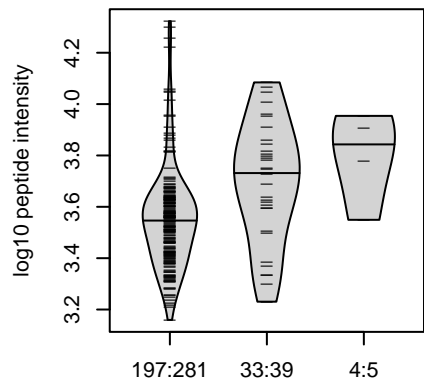

rs9995591  
 $p = 0.00014$ ,  $\beta = 0.57$ ,  $N = 234$

**SEIDLFNIR pc2**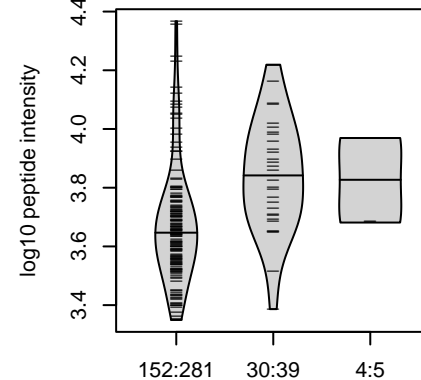

rs9995591  
 $p = 0.00017$ ,  $\beta = 0.586$ ,  $N = 186$

**GLGTDEESILLLLTSR pc2**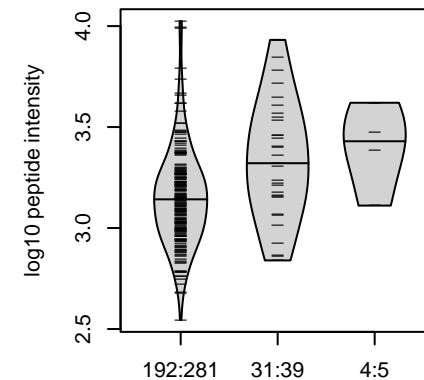

rs9995591  
 $p = 0.00055$ ,  $\beta = 0.529$ ,  $N = 227$

Locus: 65 (Sort: 79)  
 Status: Not replicated  
 80% power: Yes  
 SNP: 4:122615760:G:A  
 rsID: rs9995591  
 UniProtID: P08758  
 HGNC gene: ANXA5  
 Type: Cis-pQTL

**AKR7A2 [cis]**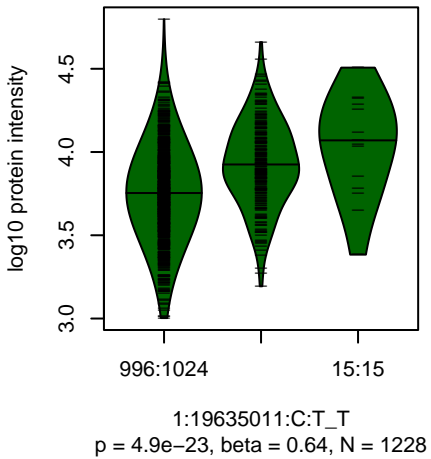**FYAYNPLAGLLTGK pc2**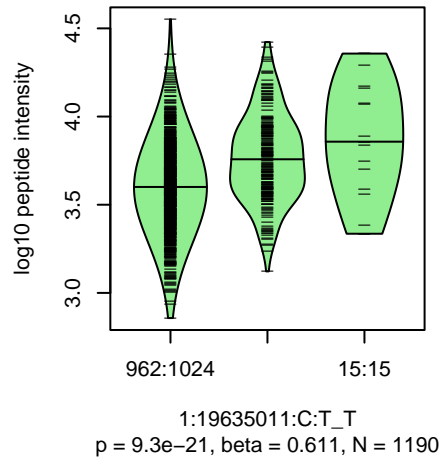**VASVLGTMEMGR pc2**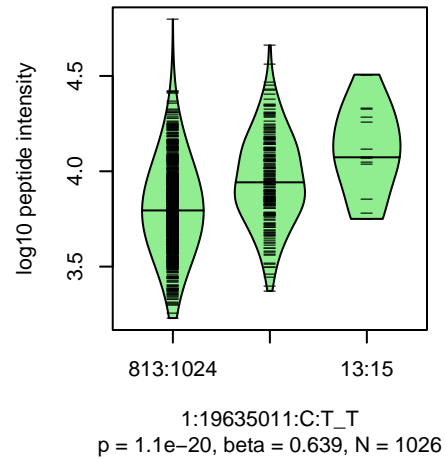**QVETELFPCLR pc2**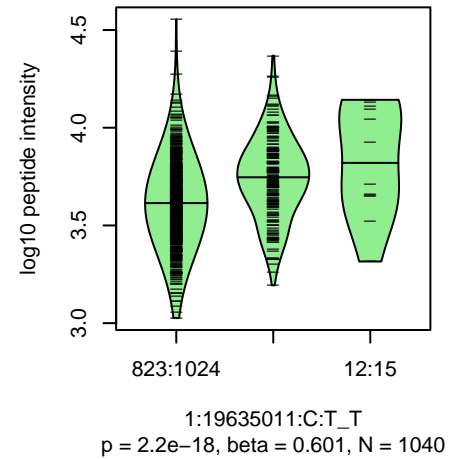**MDAPASAAAVR pc2**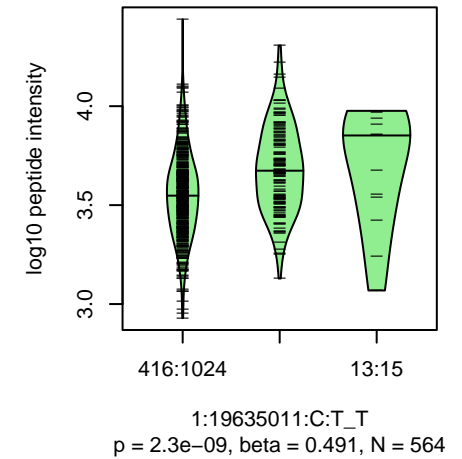**O43488 NP5**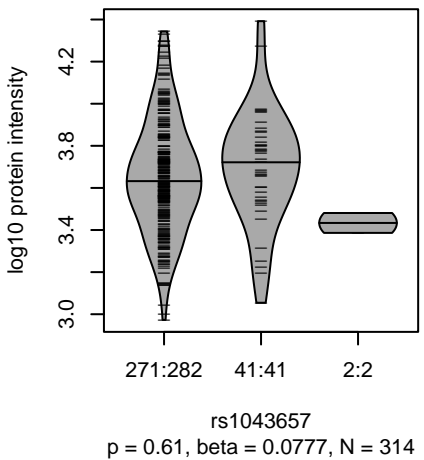**MDAPASAAAVR pc2**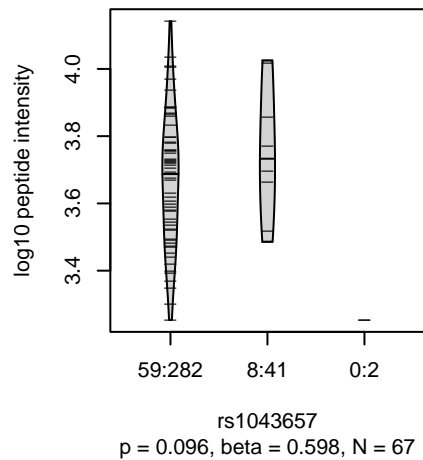**VASVLGTMEMGR pc2**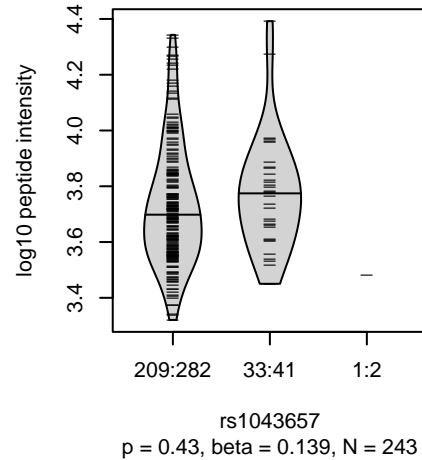**ALQAAYGASAPSVTSAALR pc2**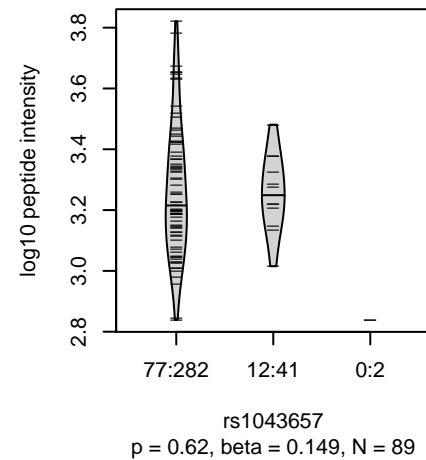**FYAYNPLAGLLTGK pc2**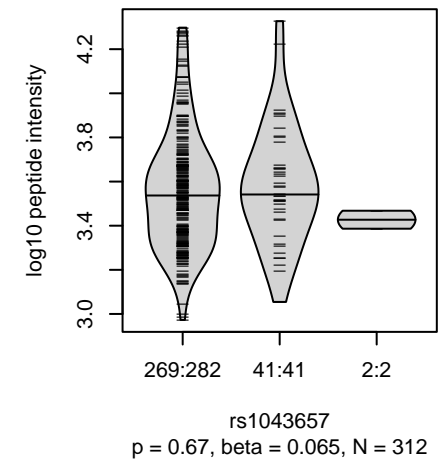

Locus: 66 (Sort: 80)  
 Status: Not replicated  
 80% power: Yes  
 SNP: 1:19635011:C:T  
 rsID: rs1043657  
 UniProtID: O43488  
 HGNC gene: AKR7A2  
 Type: Cis-pQTL

**HLA-B [cis]**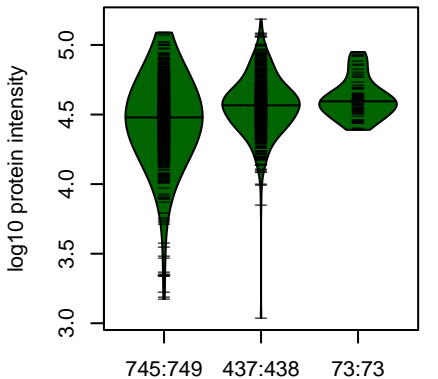

6:31117619:T:C\_T  
 $p = 1.2e-22$ ,  $\beta = 0.447$ ,  $N = 1255$

**FDSAASPR pc2**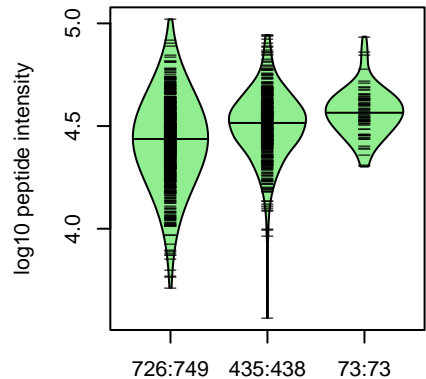

6:31117619:T:C\_T  
 $p = 3.2e-28$ ,  $\beta = 0.503$ ,  $N = 1234$

**SWTAADTAAQITQR pc2**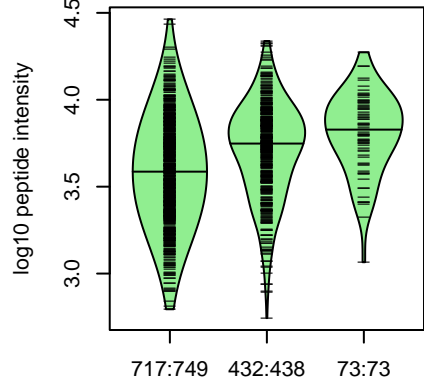

6:31117619:T:C\_T  
 $p = 7.1e-27$ ,  $\beta = 0.492$ ,  $N = 1222$

**DYIALNEDLR pc2**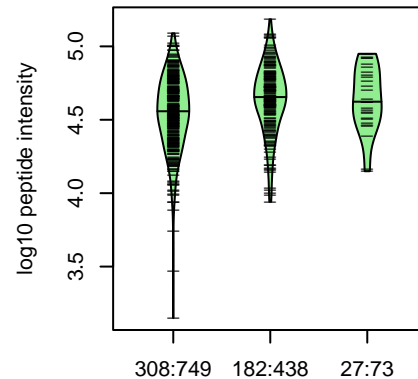

6:31117619:T:C\_T  
 $p = 2.1e-08$ ,  $\beta = 0.405$ ,  $N = 517$

**DGEDQTQDTELVETRPAGDR pc3**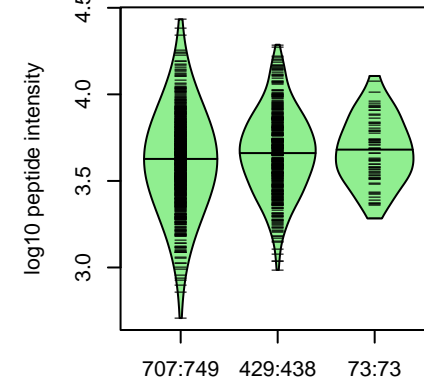

6:31117619:T:C\_T  
 $p = 0.00026$ ,  $\beta = 0.172$ ,  $N = 1209$

**P01889 NP2**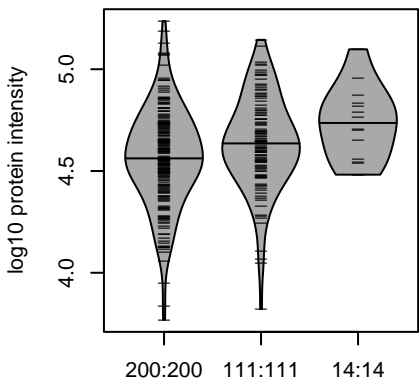

rs3130498  
 $p = 0.0018$ ,  $\beta = 0.294$ ,  $N = 325$

**SWTAADTAAQITQR pc2**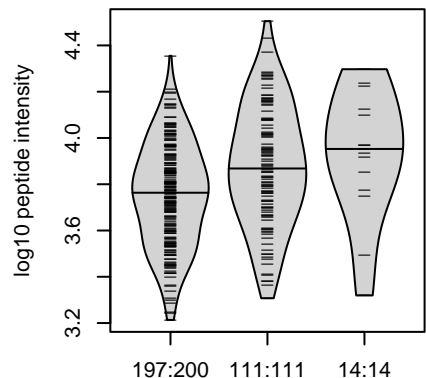

rs3130498  
 $p = 1.5e-05$ ,  $\beta = 0.408$ ,  $N = 322$

**FDSAASPR pc2**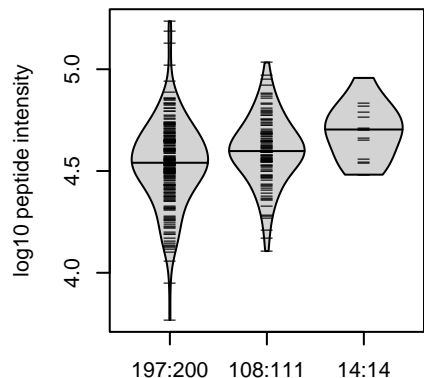

rs3130498  
 $p = 0.00027$ ,  $\beta = 0.346$ ,  $N = 319$

**DGEDQTQDTELVETRPAGDR pc3**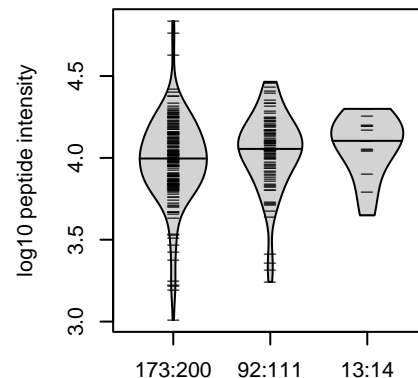

rs3130498  
 $p = 0.022$ ,  $\beta = 0.232$ ,  $N = 278$

**RAYLEGECVEWLR pc3**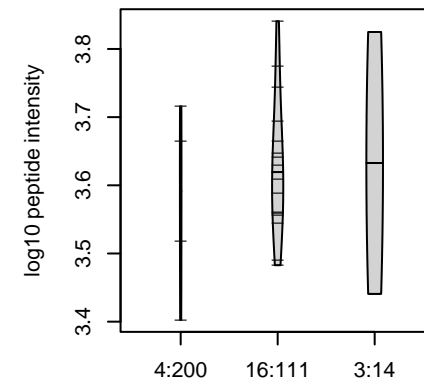

rs3130498  
 $p = 0.069$ ,  $\beta = 0.617$ ,  $N = 23$

Locus: 67 (Sort: 81)  
 Status: Not replicated  
 80% power: Yes  
 SNP: 6:31117619:T:C  
 rsID: rs3130498  
 UniProtID: P01889  
 HGNC gene: HLA-B  
 Type: Cis-pQTL

**GEPRFISGVYDDTQFVR pc3  
rs1050437 REF**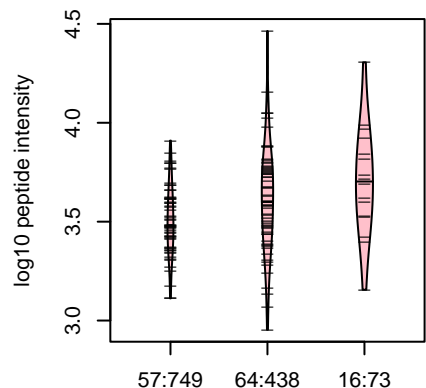

6:31117619:T:C\_T  
 $p = 8.6e-06$ , model = REC,  $N = 137$

**FISVGYVDDTQFVR pc2  
rs1050437 REF**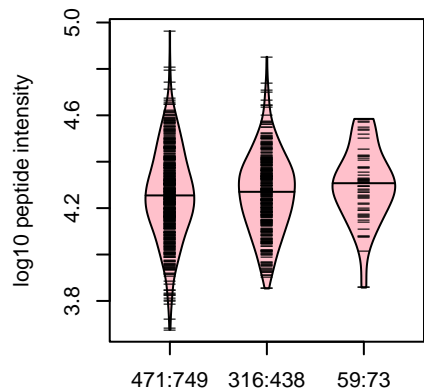

6:31117619:T:C\_T  
 $p = 9.3e-05$ , model = REC,  $N = 846$

**WAAVVPSGEEQR pc2  
rs707908;rs1736924 ALT**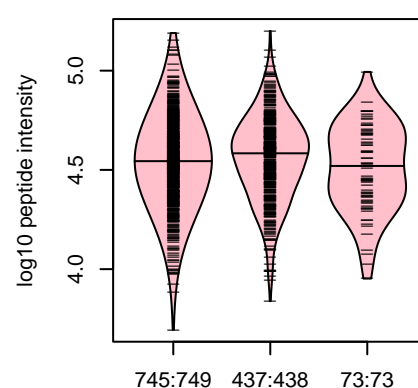

6:31117619:T:C\_T  
 $p = 0.65$ , model = REC,  $N = 1255$



**MST1 [cis]**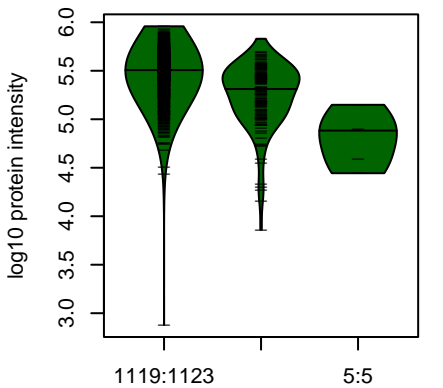

3:49956036:G:A\_A  
 p = 1.2e-22, beta = -0.823, N = 1255

**MVCGPSGSQLVLLK pc2**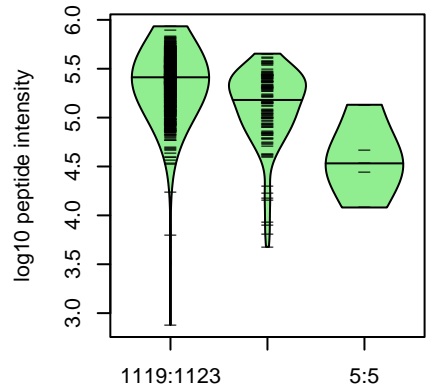

3:49956036:G:A\_A  
 p = 9.7e-23, beta = -0.825, N = 1255

**QEATTVSCFR pc2**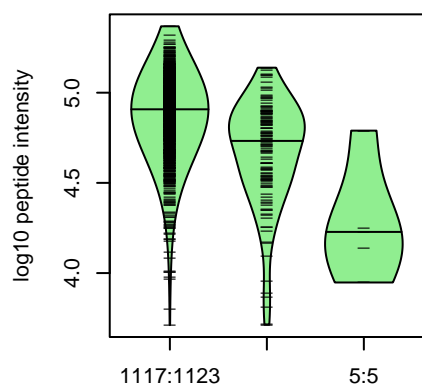

3:49956036:G:A\_A  
 p = 3.7e-22, beta = -0.819, N = 1251

**CGPLMDCR pc2**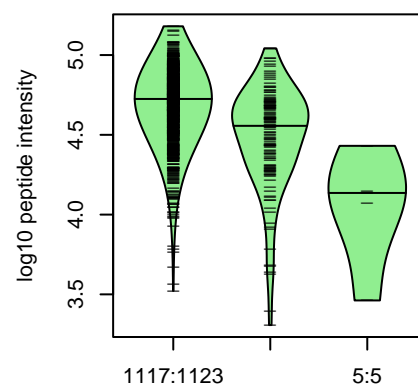

3:49956036:G:A\_A  
 p = 8e-20, beta = -0.77, N = 1252

**TPFDYCALR pc2**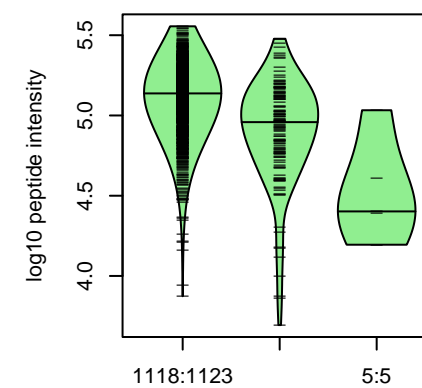

3:49956036:G:A\_A  
 p = 1.8e-19, beta = -0.761, N = 1254

**G3XAK1 NP3**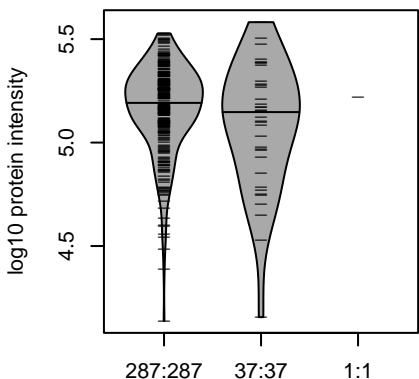

rs142344547  
 p = 0.19, beta = -0.208, N = 325

**TCIMNNGVGYR pc2**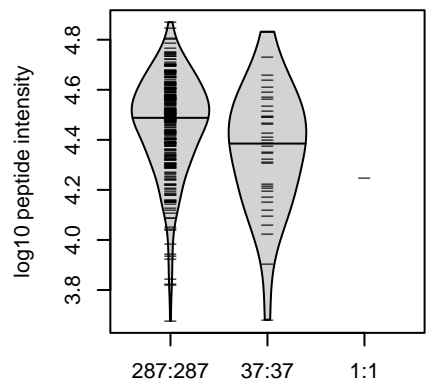

rs142344547  
 p = 0.0035, beta = -0.475, N = 325

**WDAQIPHQHR pc2**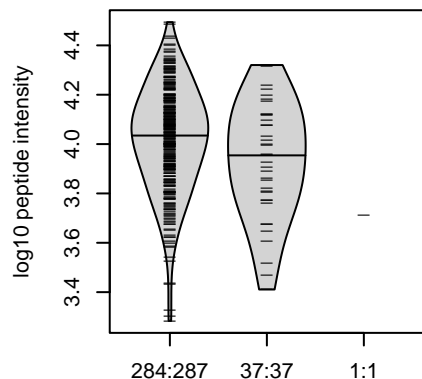

rs142344547  
 p = 0.0068, beta = -0.442, N = 322

**QEATTVSCFR pc2**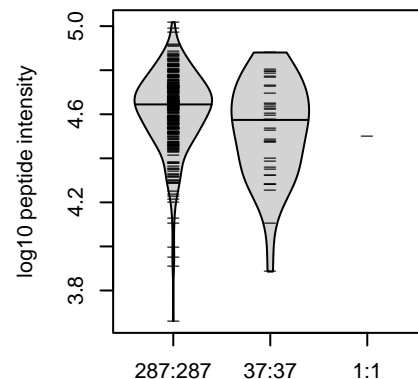

rs142344547  
 p = 0.011, beta = -0.416, N = 325

**TPFDYCALR pc2**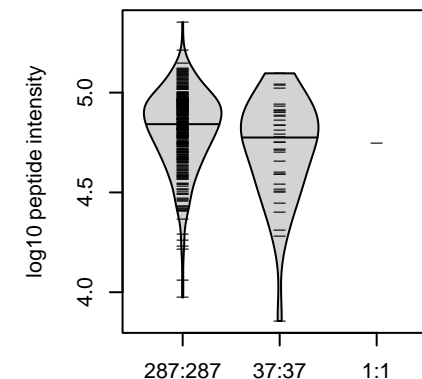

rs142344547  
 p = 0.011, beta = -0.415, N = 325

**WPAVFTR pc2  
rs3197999 REF**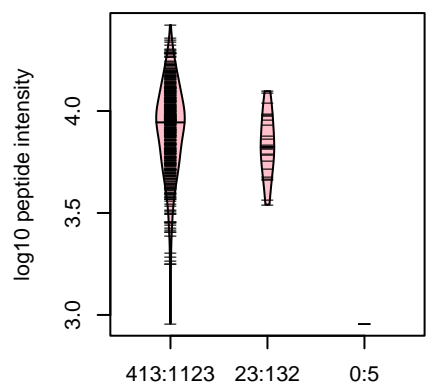

3:49956036:G:A\_A  
 p = 1.5e-06, model = REC, N = 436

**SCWPAVFTR pc2  
rs3197999 ALT**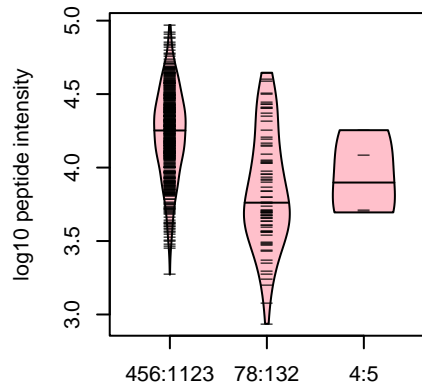

3:49956036:G:A\_A  
 p = 2.3e-05, model = REC, N = 538

Locus: 68 (Sort: 82)  
 Status: Not replicated  
 80% power: Yes  
 SNP: 3:49956036:G:A  
 rsID: rs142344547  
 UniProtID: G3XAK1  
 HGNC gene: MST1  
 Type: Cis-pQTL

**HSPB1 [cis]**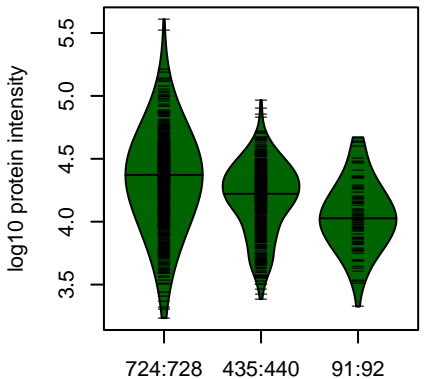

7:75924218:G:T\_T  
 $p = 2.6e-22$ ,  $\beta = -0.427$ ,  $N = 1250$

**VSLDVNHFAPDELTVK pc3**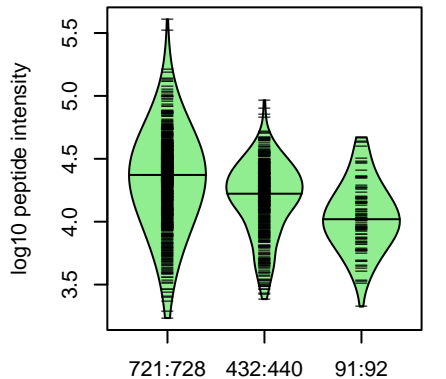

7:75924218:G:T\_T  
 $p = 2.1e-22$ ,  $\beta = -0.429$ ,  $N = 1244$

**QLSSGVSEIR pc2**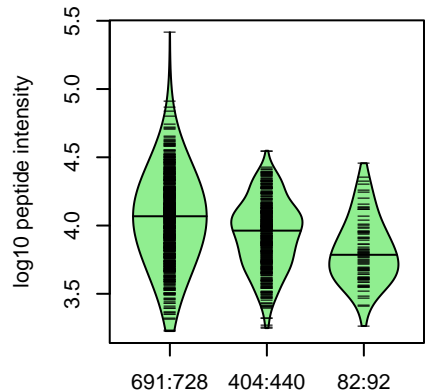

7:75924218:G:T\_T  
 $p = 9.6e-17$ ,  $\beta = -0.381$ ,  $N = 1177$

**DGVVEITGK pc2**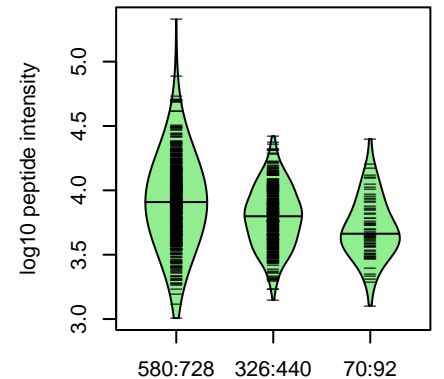

7:75924218:G:T\_T  
 $p = 6.5e-14$ ,  $\beta = -0.376$ ,  $N = 976$

**AQLGGPEAAK pc2**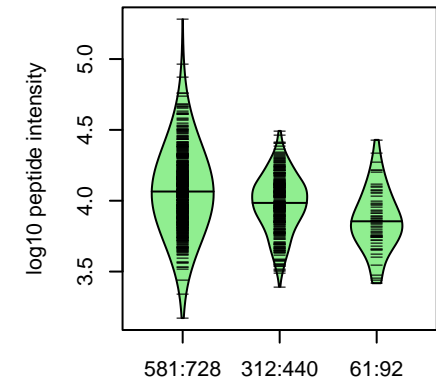

7:75924218:G:T\_T  
 $p = 4e-13$ ,  $\beta = -0.376$ ,  $N = 954$

**P04792 NP4**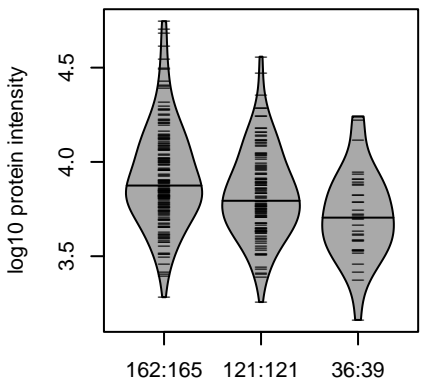

rs2908203  
 $p = 4.5e-05$ ,  $\beta = -0.325$ ,  $N = 319$

**VSLDVNHFAPDELTVK pc3**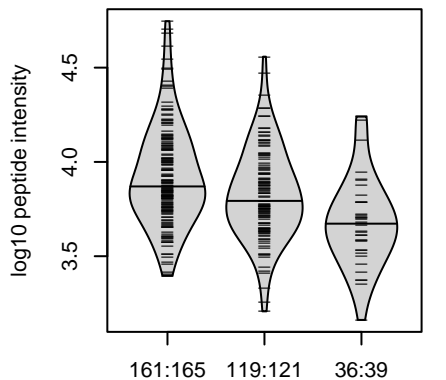

rs2908203  
 $p = 8.7e-06$ ,  $\beta = -0.356$ ,  $N = 316$

**QLSSGVSEIR pc2**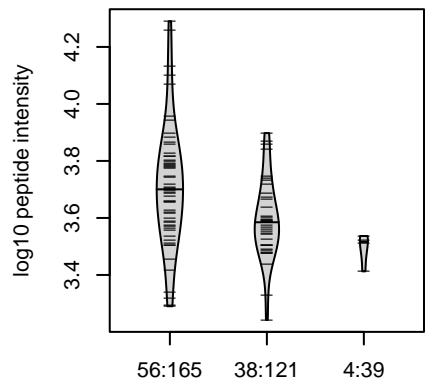

rs2908203  
 $p = 0.0028$ ,  $\beta = -0.499$ ,  $N = 98$

**GPSWDPFRDWYPHSR pc3**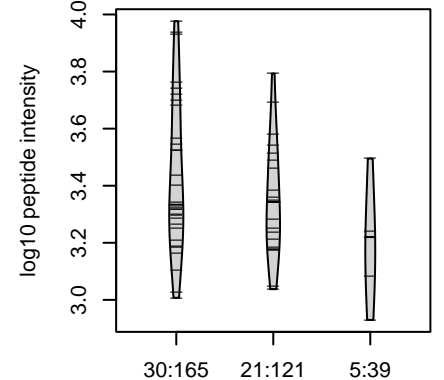

rs2908203  
 $p = 0.039$ ,  $\beta = -0.398$ ,  $N = 56$

**LATQSNEITIPVTFESR pc2**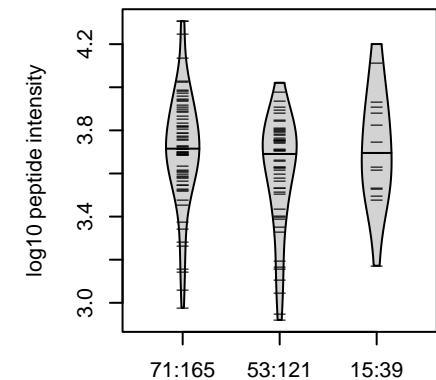

rs2908203  
 $p = 0.1$ ,  $\beta = -0.2$ ,  $N = 139$

Locus: 69 (Sort: 83)

Status: Replicated

80% power: Yes

SNP: 7:75924218:G:T

rsID: rs2908203

UniProtID: P04792

HGNC gene: HSPB1

Type: Cis-pQTL

**ERAP1 [cis]**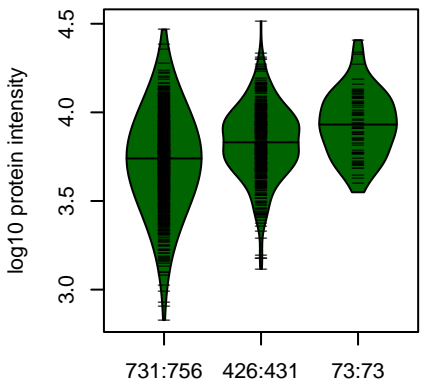

5:96134113:A:G\_A  
 $p = 2.6e-22$ ,  $\beta = 0.446$ ,  $N = 1230$

**GFPLITIVR pc2**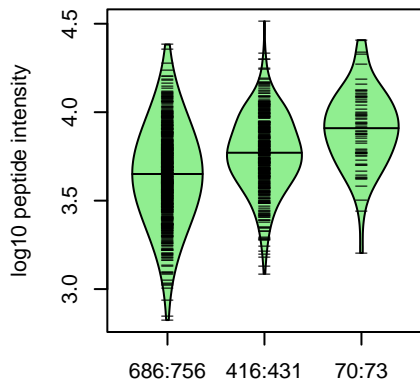

5:96134113:A:G\_A  
 $p = 2.9e-26$ ,  $\beta = 0.496$ ,  $N = 1172$

**TDVLILPEEVEWIK pc2**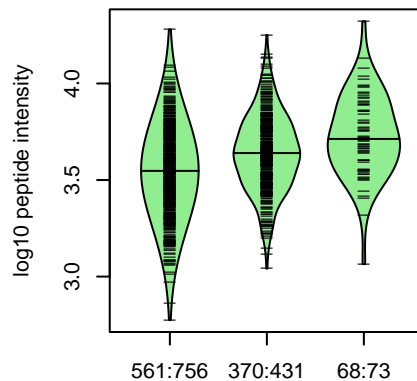

5:96134113:A:G\_A  
 $p = 4.1e-17$ ,  $\beta = 0.419$ ,  $N = 999$

**LQWLLDESFK pc2**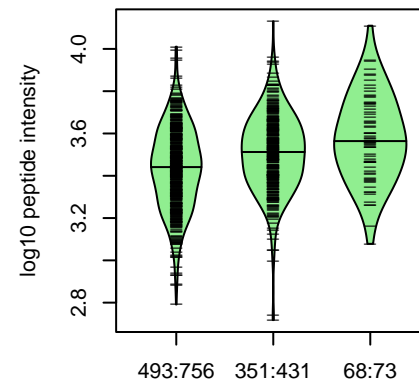

5:96134113:A:G\_A  
 $p = 8.5e-12$ ,  $\beta = 0.352$ ,  $N = 912$

**ASLINNAFQLVSIK pc2**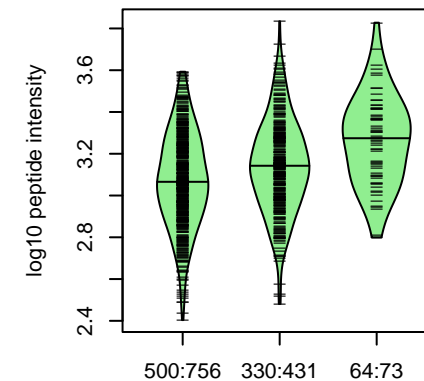

5:96134113:A:G\_A  
 $p = 2.3e-11$ ,  $\beta = 0.35$ ,  $N = 894$

**Q9NZ08 NP5**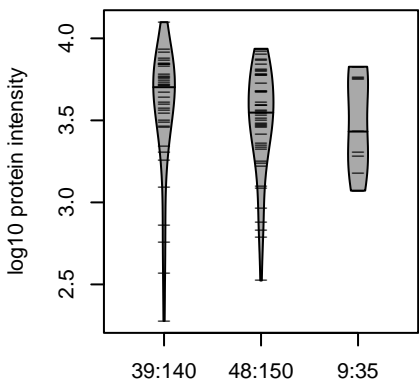

rs26491  
 $p = 0.38$ ,  $\beta = -0.136$ ,  $N = 96$

**GFPLITIVR pc2**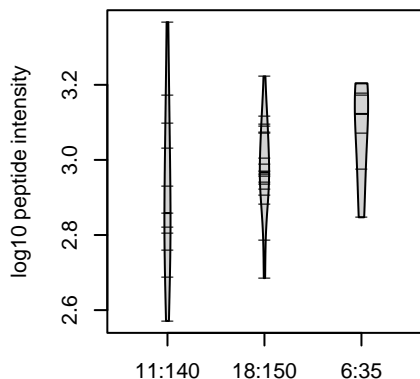

rs26491  
 $p = 0.15$ ,  $\beta = 0.331$ ,  $N = 35$

**EYLSADAFK pc2**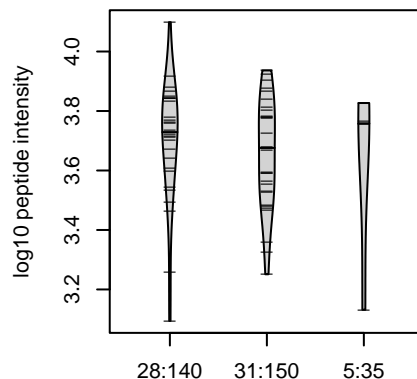

rs26491  
 $p = 0.62$ ,  $\beta = -0.0961$ ,  $N = 64$

**LSEELQVLEHPR pc3  
rs26653 REF**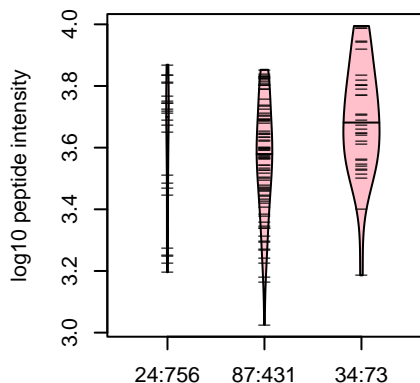

5:96134113:A:G\_A  
 $p = 3.5e-30$ ,  $\text{model} = \text{REC}$ ,  $N = 145$

Locus: 70 (Sort: 84)  
 Status: Not replicated  
 80% power: No  
 SNP: 5:96134113:A:G  
 rsID: rs26491  
 UniProtID: Q9NZ08  
 HGNC gene: ERAP1  
 Type: Cis-pQTL

**SFTPD [cis]**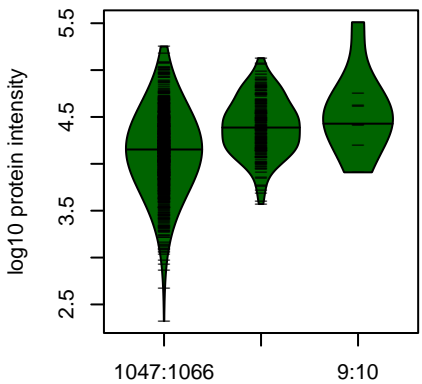

10:81707371:G:A\_A  
 p = 3e-22, beta = 0.693, N = 1240

**SAAENAALQQLVVAK pc2**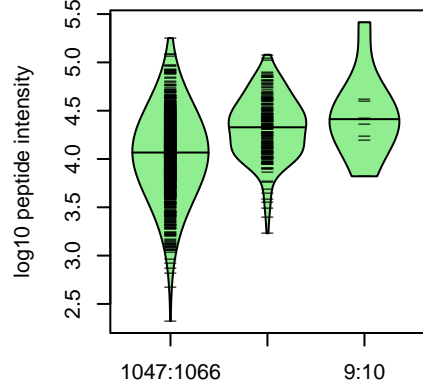

10:81707371:G:A\_A  
 p = 5.5e-23, beta = 0.705, N = 1240

**NEAFLSMTDSK pc2**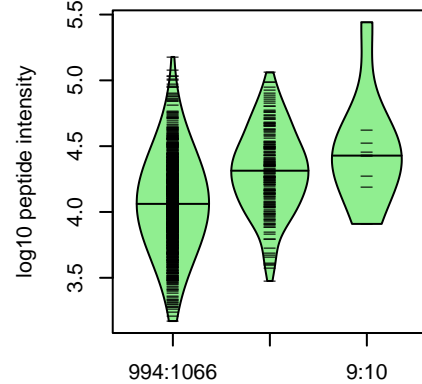

10:81707371:G:A\_A  
 p = 1.3e-20, beta = 0.67, N = 1186

**QGNIGPQGK pc2**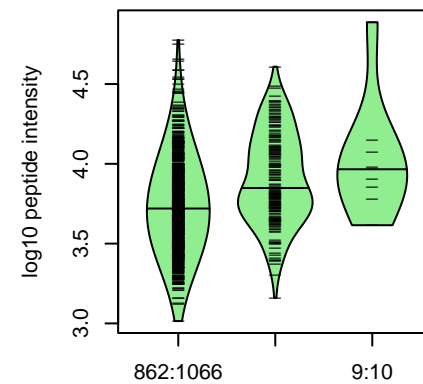

10:81707371:G:A\_A  
 p = 8.7e-13, beta = 0.529, N = 1048

**KVELFPNGQSVGEK pc3**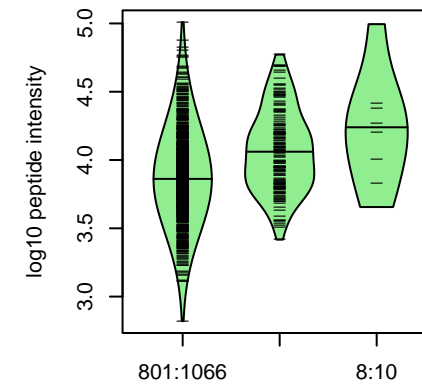

10:81707371:G:A\_A  
 p = 1.7e-12, beta = 0.543, N = 973

**P35247 NP5**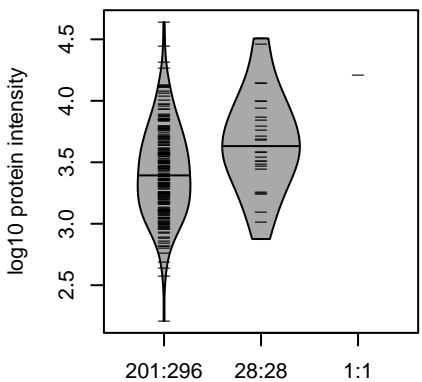

rs7074156  
 p = 9e-04, beta = 0.616, N = 230

**SAAENAALQQLVVAK pc2**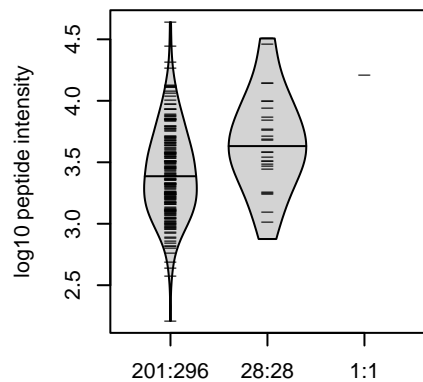

rs7074156  
 p = 0.00056, beta = 0.633, N = 230

**NEAFLSMTDSK pc2**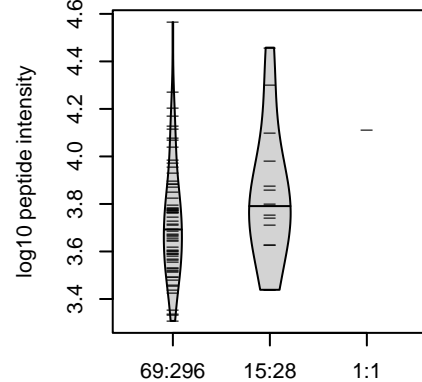

rs7074156  
 p = 0.08, beta = 0.426, N = 85

**PFTEAQLLCTQAGGQLASPR pc3  
rs3088308 REF**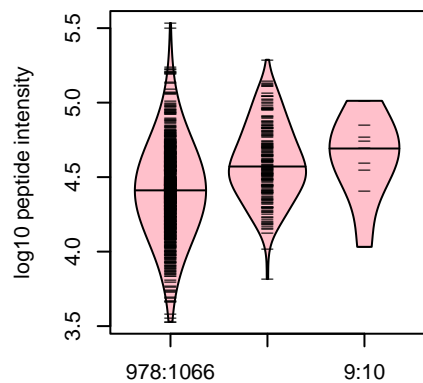

10:81707371:G:A\_A  
 p = 5.3e-05, model = REC, N = 1170

**PFTEAQLLCTQAGGQLATPR pc3  
rs3088308 ALT**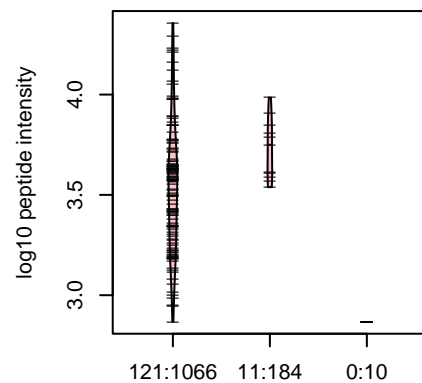

10:81707371:G:A\_A  
 p = 0.015, model = REC, N = 132

Locus: 71 (Sort: 85)  
 Status: Not replicated  
 80% power: No  
 SNP: 10:81707371:G:A  
 rsID: rs7074156  
 UniProtID: P35247  
 HGNC gene: SFTPD  
 Type: Cis-pQTL

### HLA-G [cis]

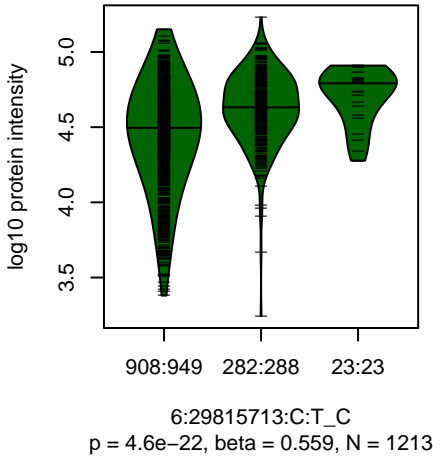

### DYLALNEDLR pc2

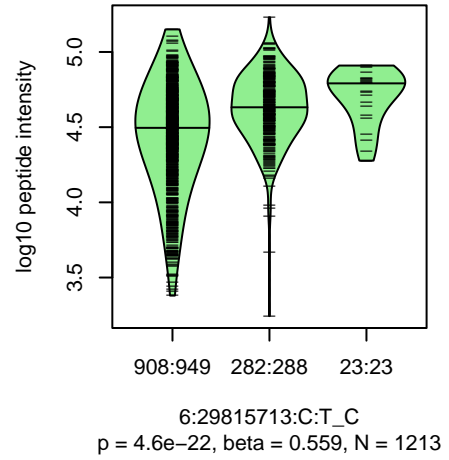

### Q5RJ85 NP1

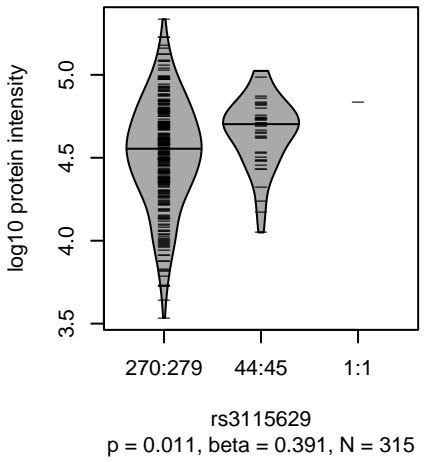

### DYLALNEDLR pc2

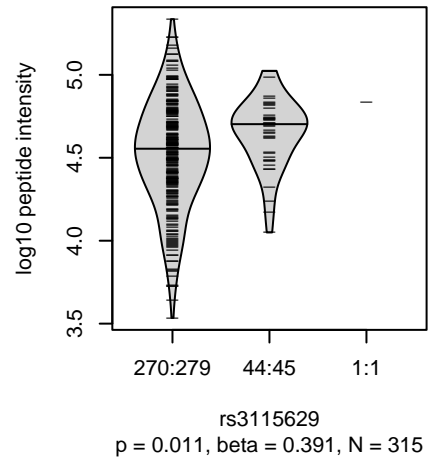

Locus: 72 (Sort: 86)  
Status: Not replicated  
80% power: Yes  
SNP: 6:29815713:C:T  
rsID: rs3115629  
UniProtID: Q5RJ85  
HGNC gene: HLA-G  
Type: Cis-pQTL

### WAAVVPSGEEQR pc2 rs707908;rs1736924 ALT

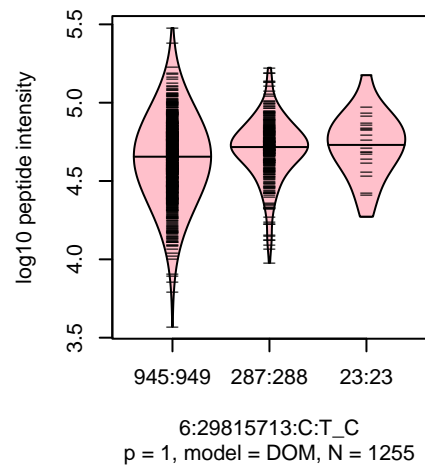

**HP [cis]**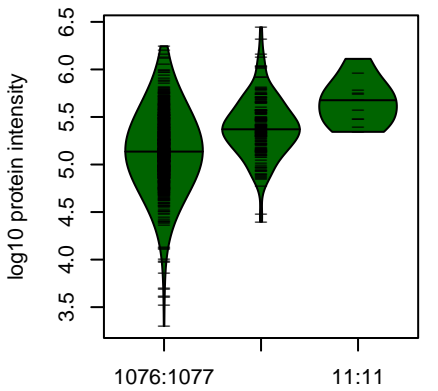

16:72260991:A:G\_G  
 $p = 7.4e-22$ ,  $\beta = 0.689$ ,  $N = 1259$

**VTSIQDWVQK pc2**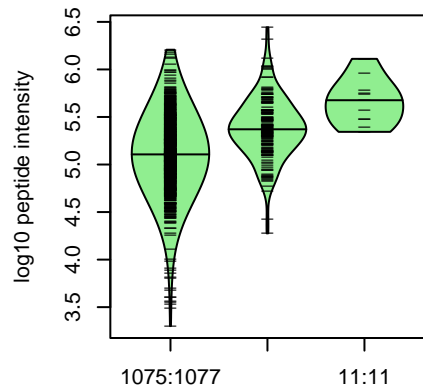

16:72260991:A:G\_G  
 $p = 6.6e-24$ ,  $\beta = 0.722$ ,  $N = 1258$

**TEGDGVYTLNNEK pc2**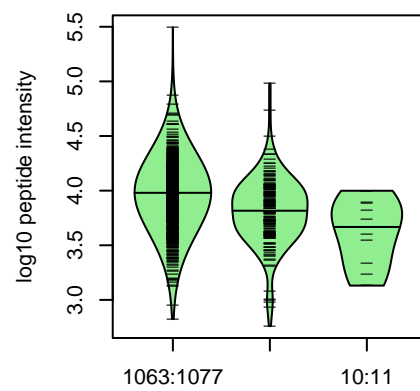

16:72260991:A:G\_G  
 $p = 6.4e-12$ ,  $\beta = -0.507$ ,  $N = 1240$

**LRTEGDGVYTLNNEK pc3**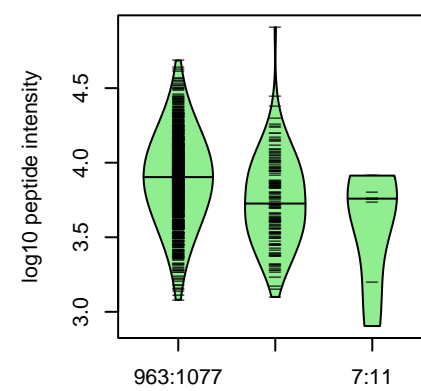

16:72260991:A:G\_G  
 $p = 4e-09$ ,  $\beta = -0.487$ ,  $N = 1104$

**TEGDGVYTLNDKK pc3**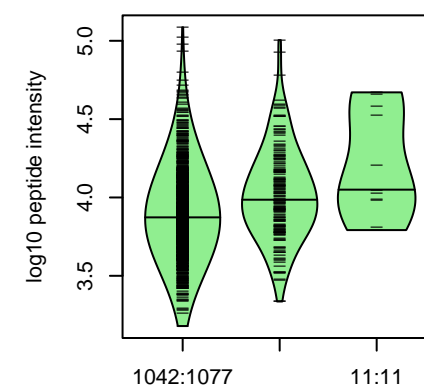

16:72260991:A:G\_G  
 $p = 5.7e-06$ ,  $\beta = 0.334$ ,  $N = 1220$

**P00738 NP4**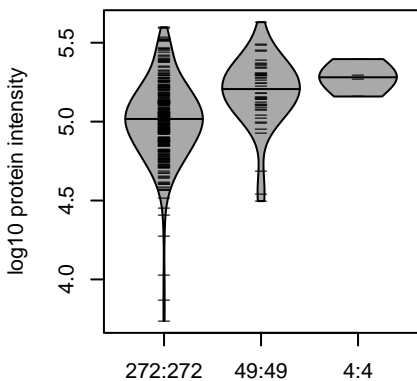

rs2189680  
 $p = 1e-05$ ,  $\beta = 0.587$ ,  $N = 325$

**VTSIQDWVQK pc2**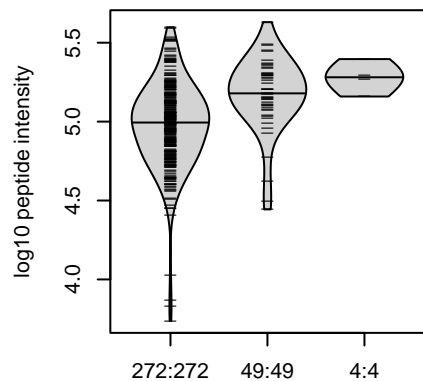

rs2189680  
 $p = 8.8e-06$ ,  $\beta = 0.584$ ,  $N = 325$

**LRTEGDGVYTLNDK pc2**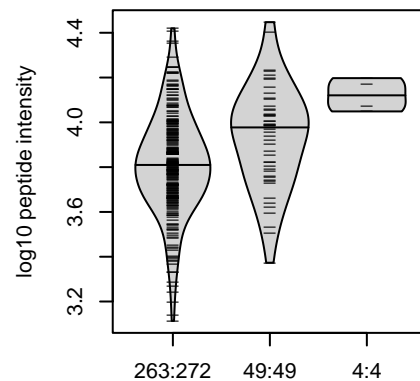

rs2189680  
 $p = 0.00023$ ,  $\beta = 0.487$ ,  $N = 316$

**TEGDGVYTLNNEK pc2**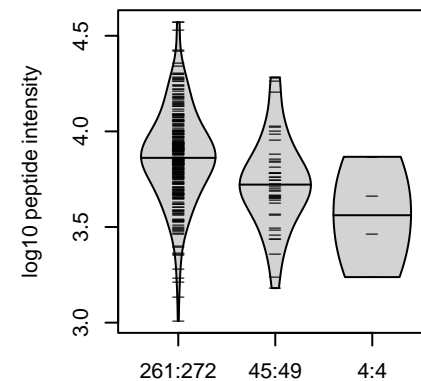

rs2189680  
 $p = 0.00029$ ,  $\beta = -0.491$ ,  $N = 310$

**LPECEAVCGK pc2**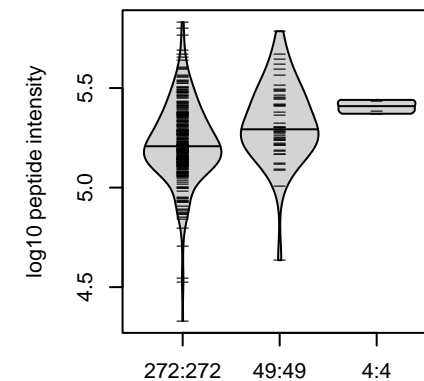

rs2189680  
 $p = 0.00056$ ,  $\beta = 0.455$ ,  $N = 325$

Locus: 73 (Sort: 87)  
 Status: Replicated  
 80% power: Yes  
 SNP: 16:72260991:A:G  
 rsID: rs2189680  
 UniProtID: P00738  
 HGNC gene: HP  
 Type: Cis-pQTL

**CSTF3 [trans]**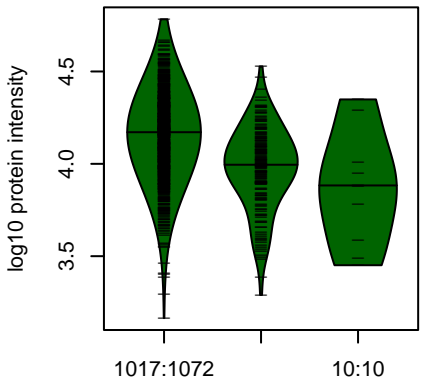

20:36997655:C:T\_T  
 p = 1.1e-21, beta = -0.7, N = 1195

**LAALPDPVVPVSIIVLKLK pc3**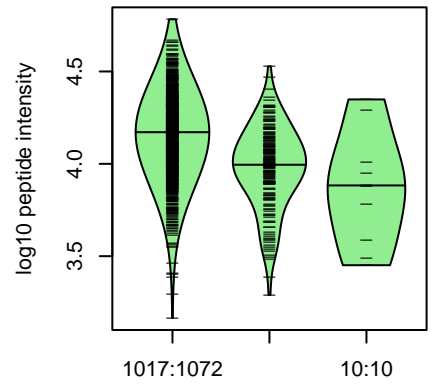

20:36997655:C:T\_T  
 p = 1.1e-21, beta = -0.7, N = 1195

**Q12996 NP4**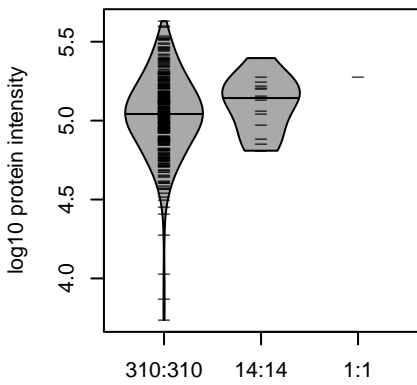

rs2232613  
 p = 0.96, beta = 0.0111, N = 325

**LRTEGDGVYTLNNEK pc2**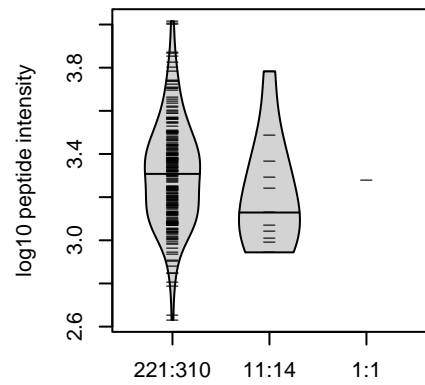

rs2232613  
 p = 0.091, beta = -0.439, N = 233

**VGIVSGWGR pc2**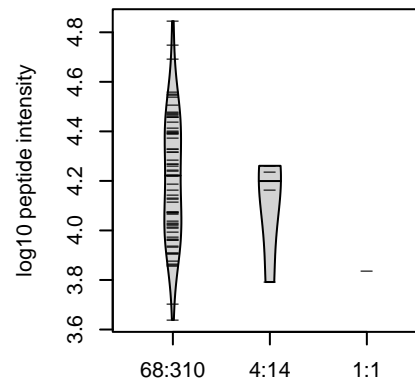

rs2232613  
 p = 0.098, beta = -0.579, N = 73

**VMPICLPSK pc2**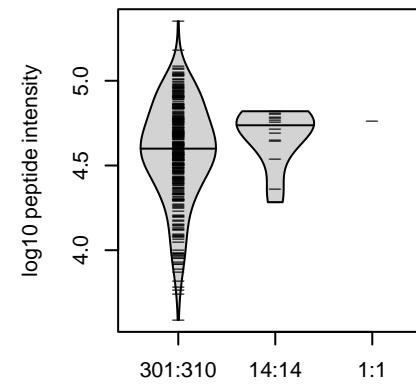

rs2232613  
 p = 0.28, beta = 0.257, N = 316

**DIAPTLTLYVGK pc2**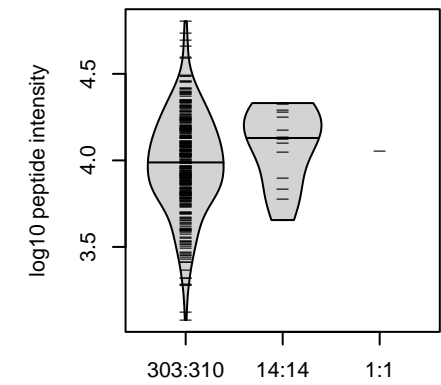

rs2232613  
 p = 0.29, beta = 0.254, N = 318

Locus: 74 (Sort: 88)  
 Status: Not replicated  
 80% power: Yes  
 SNP: 20:36997655:C:T  
 rsID: rs2232613  
 UniProtID: Q12996  
 HGNC gene: CSTF3  
 Type: Trans-pQTL

**LBP [cis]**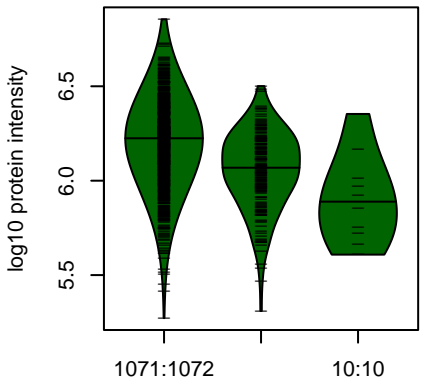

20:36997655:C:T\_T  
 $p = 8.3e-20$ ,  $\beta = -0.653$ ,  $N = 1259$

**SPVTLAAVMSLPPEHMK pc3**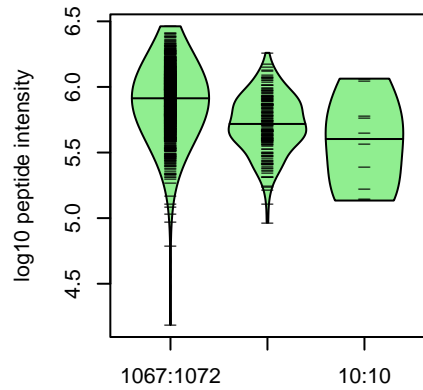

20:36997655:C:T\_T  
 $p = 3.5e-23$ ,  $\beta = -0.709$ ,  $N = 1255$

**ICEMIQK pc2**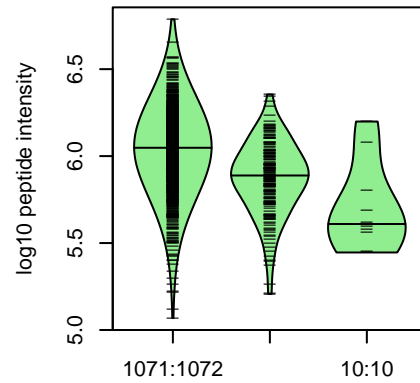

20:36997655:C:T\_T  
 $p = 1.7e-22$ ,  $\beta = -0.698$ ,  $N = 1259$

**VQLYDLGLQIHK pc3**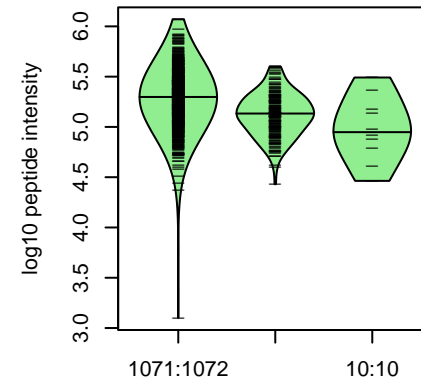

20:36997655:C:T\_T  
 $p = 4.5e-19$ ,  $\beta = -0.64$ ,  $N = 1259$

**DFLFLGANVQYMR pc2**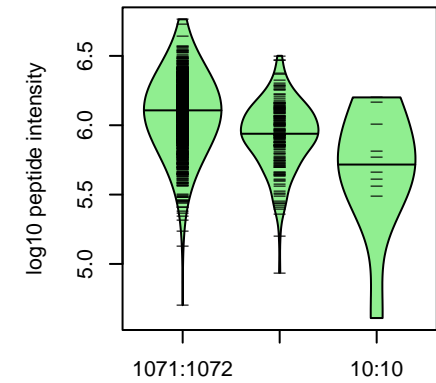

20:36997655:C:T\_T  
 $p = 5.6e-19$ ,  $\beta = -0.638$ ,  $N = 1259$

**P18428 NP4**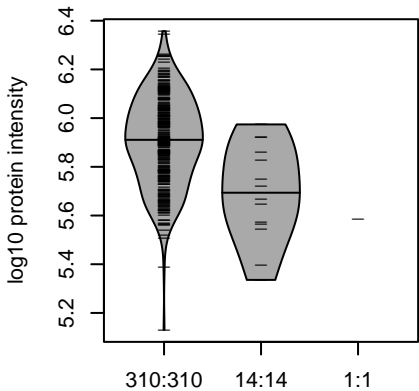

rs2232613  
 $p = 1.7e-05$ ,  $\beta = -1.02$ ,  $N = 325$

**VQLYDLGLQIHK pc3**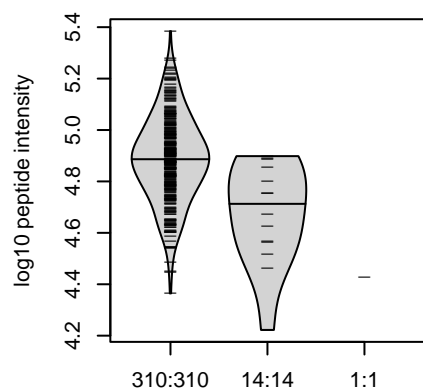

rs2232613  
 $p = 4.4e-06$ ,  $\beta = -1.08$ ,  $N = 325$

**DFLFLGANVQYMR pc2**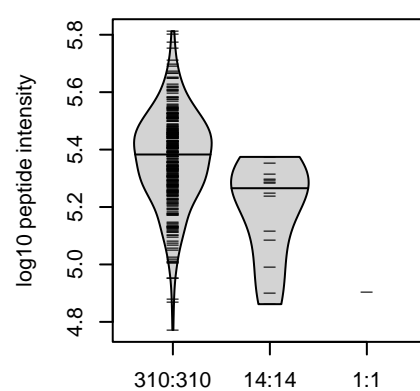

rs2232613  
 $p = 2.9e-05$ ,  $\beta = -0.983$ ,  $N = 325$

**GLQYAAQEGLLALQSELLR pc3**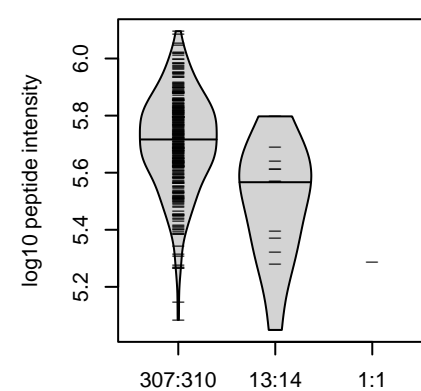

rs2232613  
 $p = 9.3e-05$ ,  $\beta = -0.945$ ,  $N = 321$

**ITLPDFTGDLR pc2**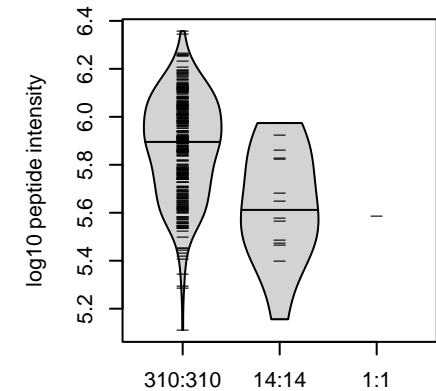

rs2232613  
 $p = 0.00019$ ,  $\beta = -0.88$ ,  $N = 325$

**VGLFNAELLEALLNYYILNTLYPK pc** **VGLFNAELLEALLNYYILNTFYPK pc**  
**rs2232618 ALT** **rs2232618 REF**

Locus: 74 (Sort: 89)  
 Status: Replicated  
 80% power: Yes  
 SNP: 20:36997655:C:T  
 rsID: rs2232613  
 UniProtID: P18428  
 HGNC gene: LBP  
 Type: Cis-pQTL

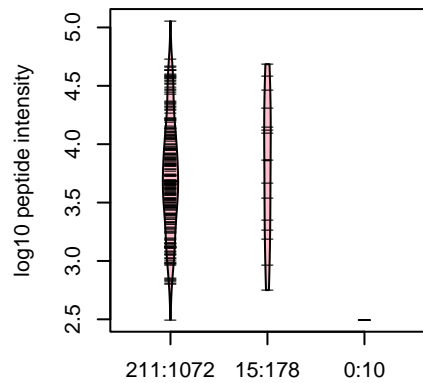

20:36997655:C:T\_T  
 $p = 5e-05$ ,  $\text{model} = \text{REC}$ ,  $N = 226$

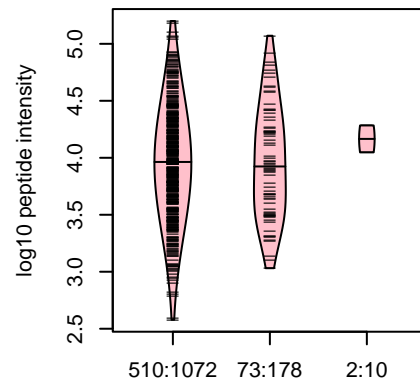

20:36997655:C:T\_T  
 $p = 0.057$ ,  $\text{model} = \text{REC}$ ,  $N = 585$



**EMC1 [trans]**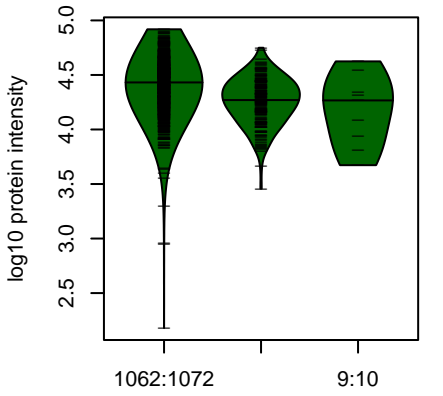

20:36997655:C:T\_T  
 $p = 2.4e-18$ ,  $\beta = -0.633$ ,  $N = 1249$

**PILQSLLLPVMDQDYAK pc3**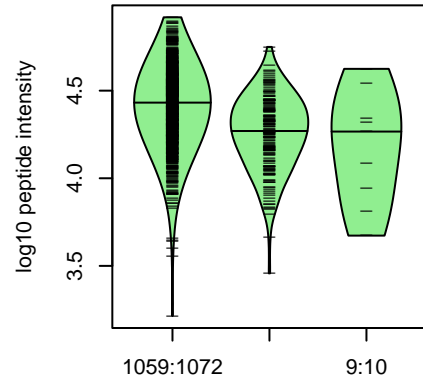

20:36997655:C:T\_T  
 $p = 2.1e-19$ ,  $\beta = -0.652$ ,  $N = 1246$

**TFIGIFLIDGVTGR pc2**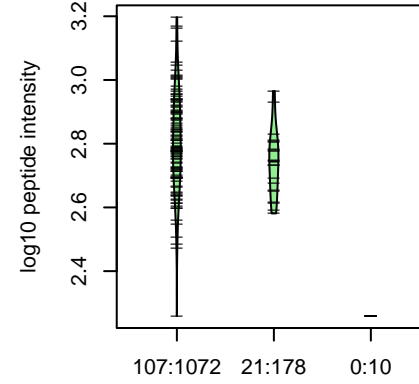

20:36997655:C:T\_T  
 $p = 0.021$ ,  $\beta = -0.532$ ,  $N = 128$

**FASLEFSPGSK pc2**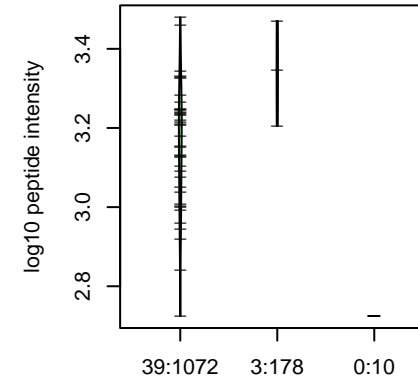

20:36997655:C:T\_T  
 $p = 0.042$ ,  $\beta = 1.13$ ,  $N = 42$

**TTLALHHLSSGHLK pc3**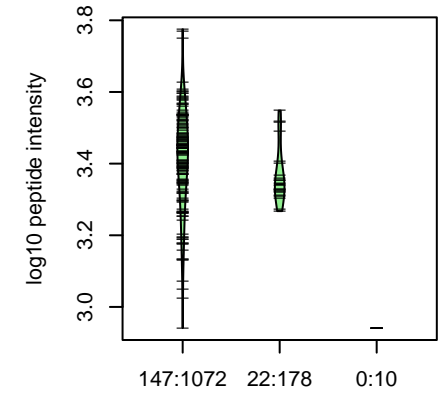

20:36997655:C:T\_T  
 $p = 0.097$ ,  $\beta = -0.371$ ,  $N = 169$

**Q8N766 NP4**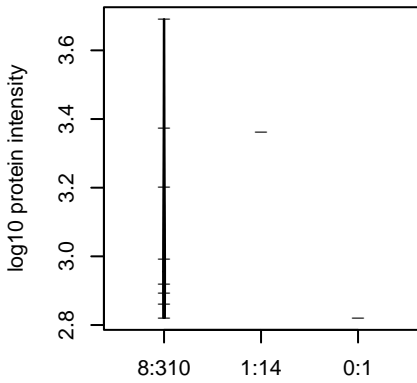

rs2232613  
 $p = 0.77$ ,  $\beta = 0.285$ ,  $N = 9$

Locus: 74 (Sort: 90)  
 Status: Not replicated  
 80% power: No  
 SNP: 20:36997655:C:T  
 rsID: rs2232613  
 UniProtID: Q8N766  
 HGNC gene: EMC1  
 Type: Trans-pQTL

**VMO1 [cis]**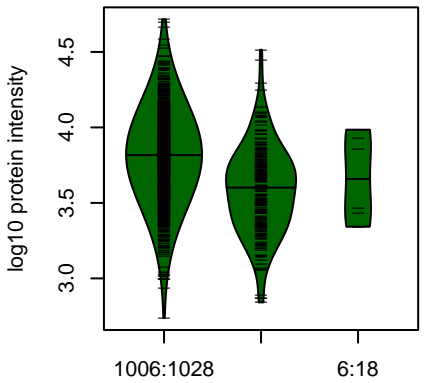

17:4689313:G:C\_C  
 $p = 1.6e-21$ ,  $\beta = -0.69$ ,  $N = 1205$

**GLGDDTALNDAR pc2**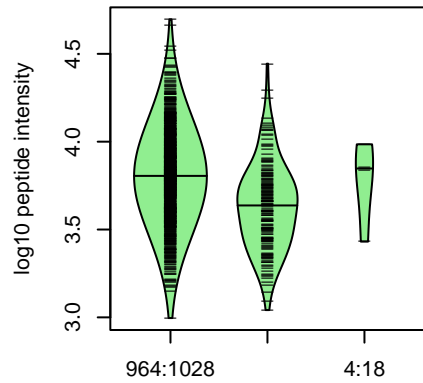

17:4689313:G:C\_C  
 $p = 4.6e-14$ ,  $\beta = -0.595$ ,  $N = 1134$

**VEAPTTLGDNTAANNVR pc2**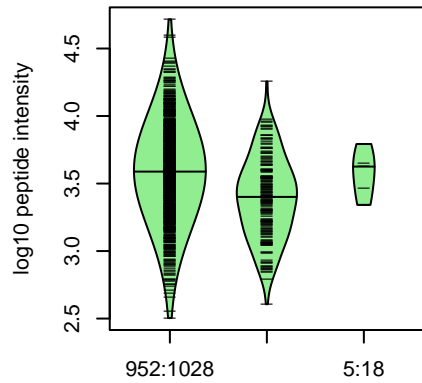

17:4689313:G:C\_C  
 $p = 2.1e-10$ ,  $\beta = -0.498$ ,  $N = 1123$

**GACGLQTK pc2**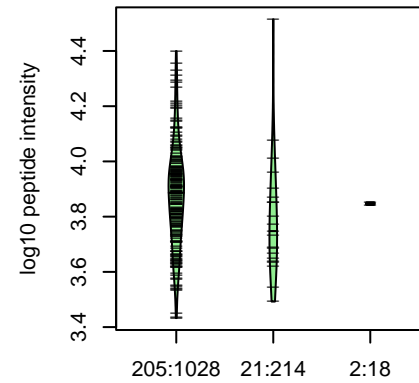

17:4689313:G:C\_C  
 $p = 0.0064$ ,  $\beta = -0.52$ ,  $N = 228$

**VEPPQGIPGDDTALNGIR pc2**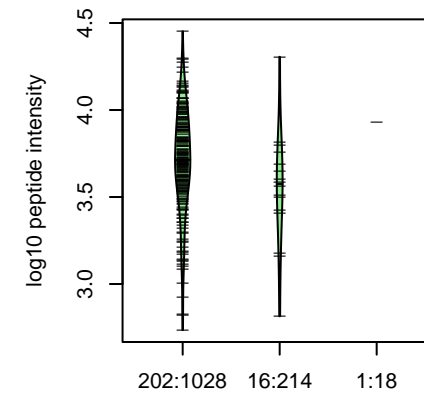

17:4689313:G:C\_C  
 $p = 0.14$ ,  $\beta = -0.334$ ,  $N = 219$

**Q7Z5L0 NP2**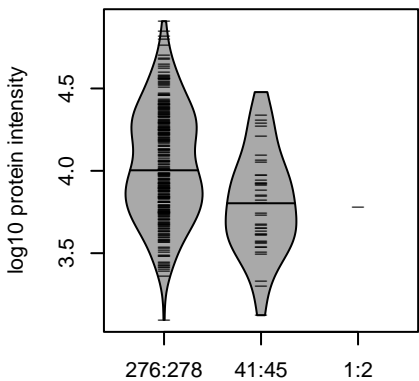

rs2279961  
 $p = 7.8e-06$ ,  $\beta = -0.688$ ,  $N = 318$

**GLGDDTALNDAR pc2**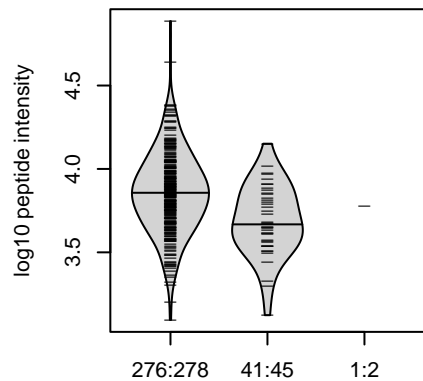

rs2279961  
 $p = 1.1e-05$ ,  $\beta = -0.683$ ,  $N = 318$

**VEAPTTLGDNTAANNVR pc2**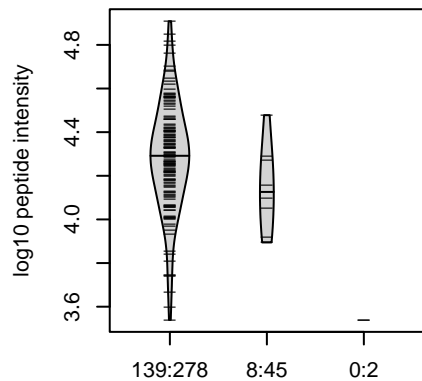

rs2279961  
 $p = 0.095$ ,  $\beta = -0.592$ ,  $N = 147$

Locus: 75 (Sort: 91)  
 Status: Replicated  
 80% power: Yes  
 SNP: 17:4689313:G:C  
 rsID: rs2279961  
 UniProtID: Q7Z5L0  
 HGNC gene: VMO1  
 Type: Cis-pQTL

**S100B [cis]**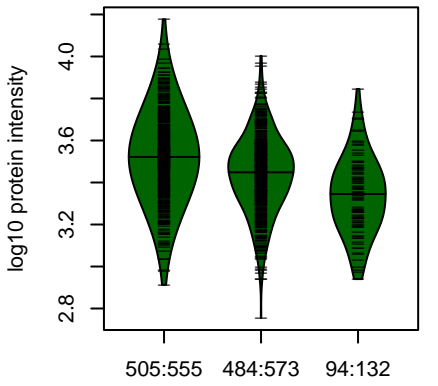

21:48025097:A:G\_A  
 $p = 2.3e-21$ ,  $\beta = -0.44$ ,  $N = 1083$

**ELINNELSHFLEEIK pc3**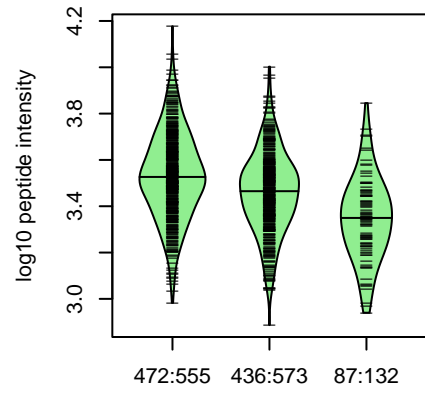

21:48025097:A:G\_A  
 $p = 3.3e-20$ ,  $\beta = -0.443$ ,  $N = 995$

**AMVALIDVFHQYSGR pc3**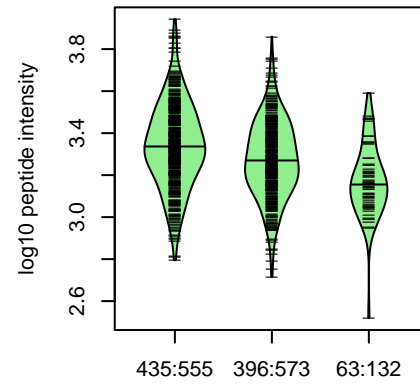

21:48025097:A:G\_A  
 $p = 6.7e-12$ ,  $\beta = -0.364$ ,  $N = 894$

**P04271 NP2**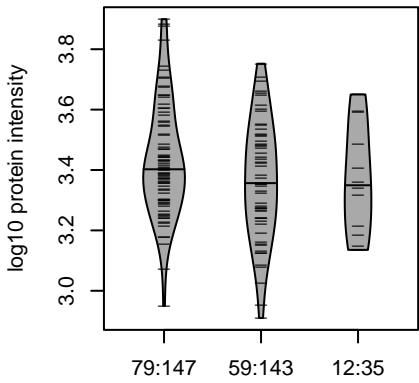

rs8128872  
 $p = 0.025$ ,  $\beta = -0.276$ ,  $N = 150$

**AMVALIDVFHQYSGR pc3**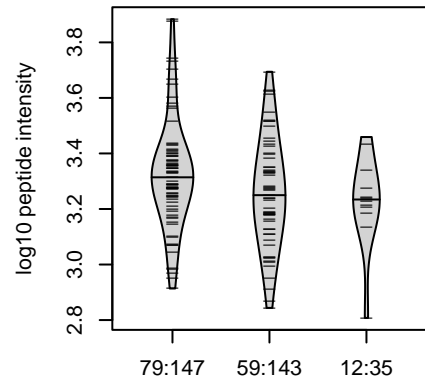

rs8128872  
 $p = 0.019$ ,  $\beta = -0.29$ ,  $N = 150$

Locus: 76 (Sort: 92)  
 Status: Not replicated  
 80% power: No  
 SNP: 21:48025097:A:G  
 rsID: rs8128872  
 UniProtID: P04271  
 HGNC gene: S100B  
 Type: Cis-pQTL

**HLA-B [cis]**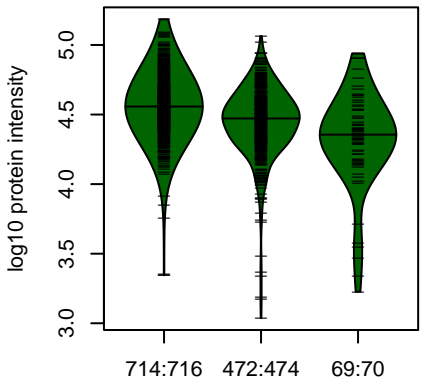

6:31107187:G:A\_A  
 $p = 3.4e-21$ ,  $\beta = -0.435$ ,  $N = 1255$

**FDSAASPR pc2**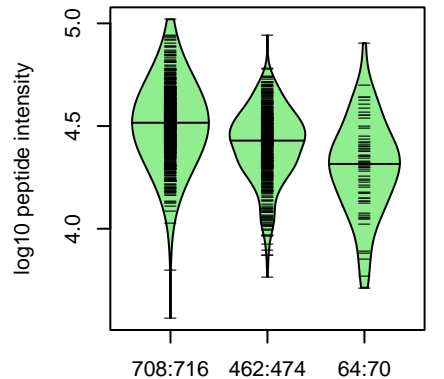

6:31107187:G:A\_A  
 $p = 3.1e-30$ ,  $\beta = -0.531$ ,  $N = 1234$

**SWTAADTAAQITQR pc2**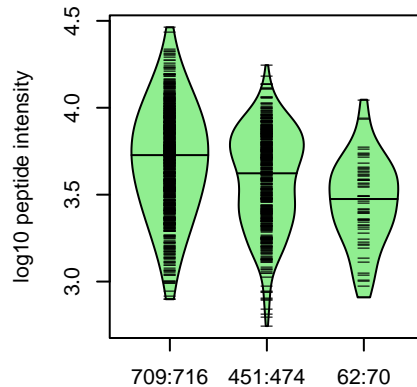

6:31107187:G:A\_A  
 $p = 7.1e-13$ ,  $\beta = -0.342$ ,  $N = 1222$

**DYIALNEDLR pc2**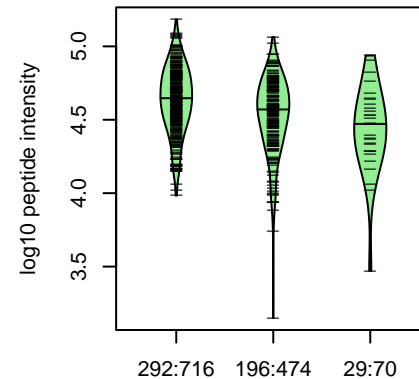

6:31107187:G:A\_A  
 $p = 1.3e-05$ ,  $\beta = -0.314$ ,  $N = 517$

**DGEDQTQDTELVETRPAGDR pc3**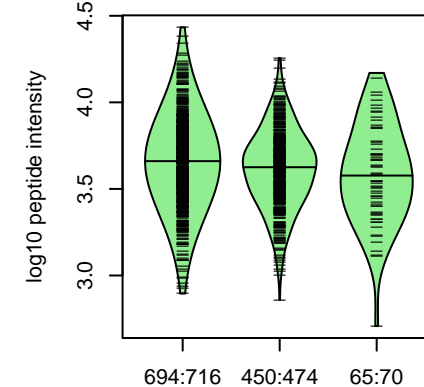

6:31107187:G:A\_A  
 $p = 0.00093$ ,  $\beta = -0.158$ ,  $N = 1209$

**P01889 NP2**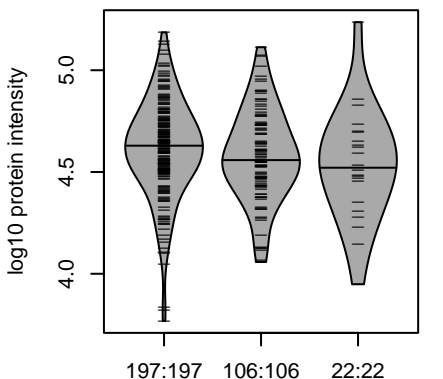

rs1265093  
 $p = 0.055$ ,  $\beta = -0.169$ ,  $N = 325$

**FDSAASPR pc2**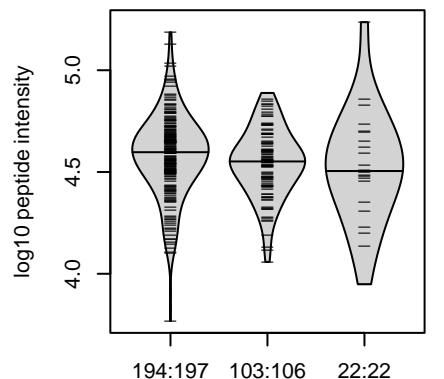

rs1265093  
 $p = 0.032$ ,  $\beta = -0.19$ ,  $N = 319$

**DGEDQTQDTELVETRPAGDR pc3**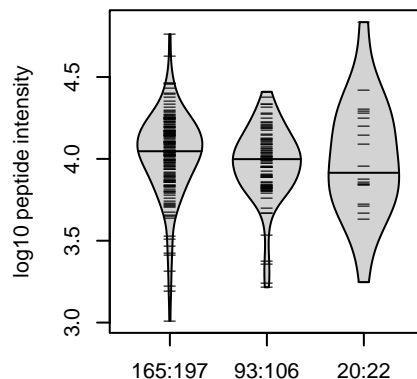

rs1265093  
 $p = 0.086$ ,  $\beta = -0.162$ ,  $N = 278$

**SWTAADTAAQITQR pc3**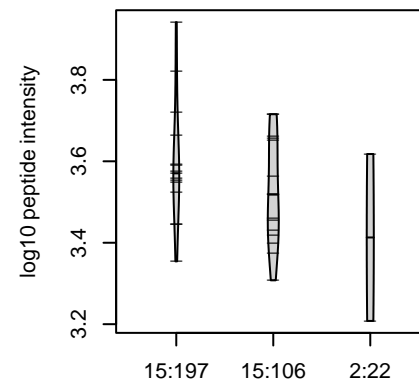

rs1265093  
 $p = 0.29$ ,  $\beta = -0.288$ ,  $N = 32$

**THVTHHPISDHEATLR pc4**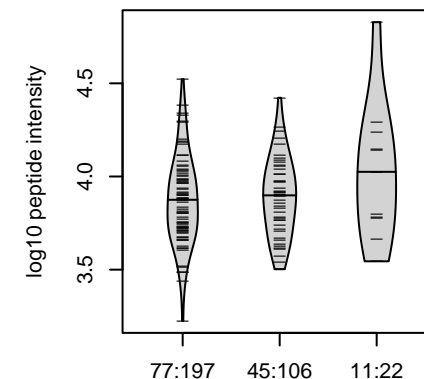

rs1265093  
 $p = 0.38$ ,  $\beta = 0.116$ ,  $N = 133$

**GEPRFISGVYDDTQFVR pc3  
rs1050437 REF**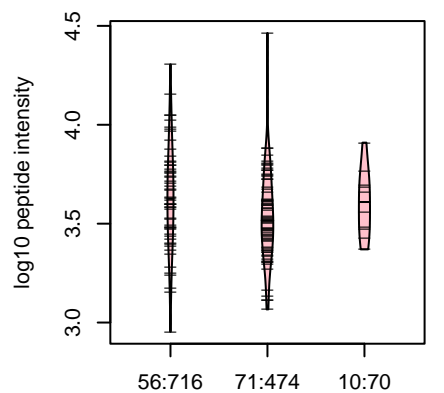

6:31107187:G:A\_A  
 $p = 7.9e-05$ ,  $\text{model} = \text{REC}$ ,  $N = 137$

**FISVGYVDDTQFVR pc2  
rs1050437 REF**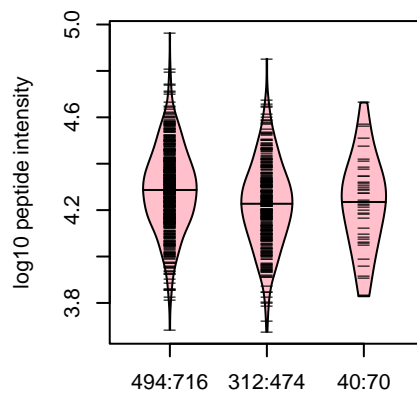

6:31107187:G:A\_A  
 $p = 0.088$ ,  $\text{model} = \text{DOM}$ ,  $N = 846$

**WAAVVVPSGEEQR pc2  
rs707908;rs1736924 ALT**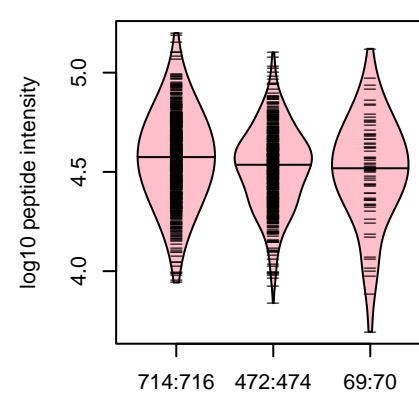

6:31107187:G:A\_A  
 $p = 0.25$ ,  $\text{model} = \text{DOM}$ ,  $N = 1255$

Locus: 77 (Sort: 93)  
 Status: Not replicated  
 80% power: Yes  
 SNP: 6:31107187:G:A  
 rsID: rs1265093  
 UniProtID: P01889  
 HGNC gene: HLA-B  
 Type: Cis-pQTL

### HLA-G [cis]

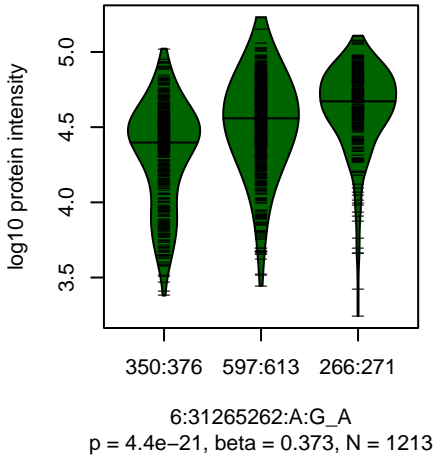

### DYLALNEDLR pc2

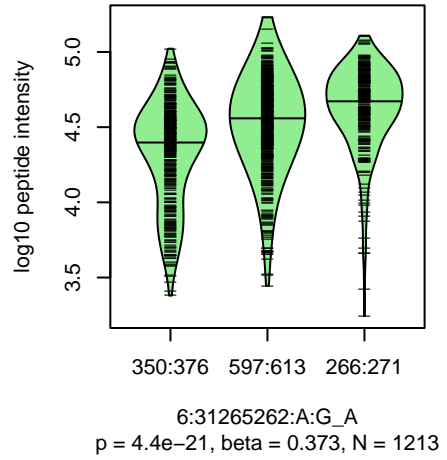

### Q5RJ85 NP1

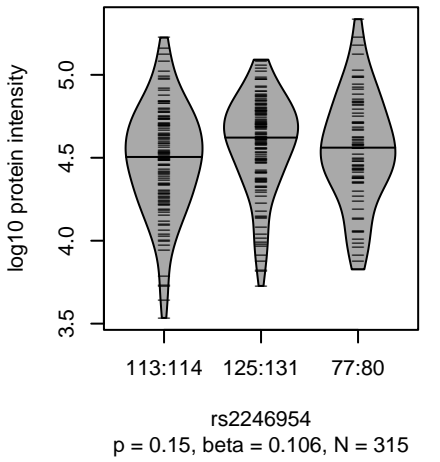

### DYLALNEDLR pc2

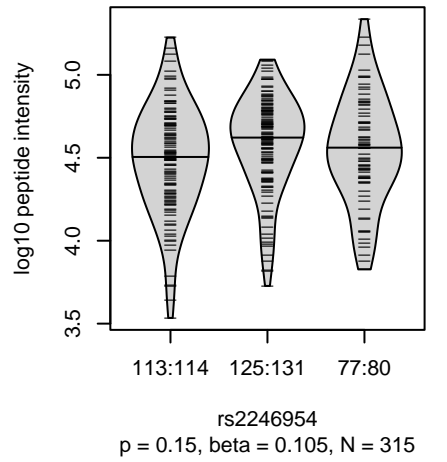

Locus: 78 (Sort: 94)  
Status: Not replicated  
80% power: Yes  
SNP: 6:31265262:A:G  
rsID: rs2246954  
UniProtID: Q5RJ85  
HGNC gene: HLA-G  
Type: Cis-pQTL

### WAAVVPSGEEQR pc2 rs707908;rs1736924 ALT

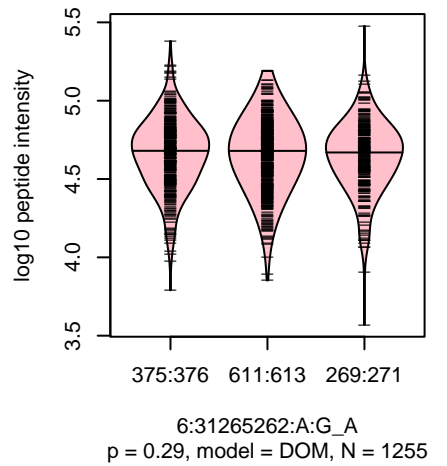

**LPA [cis]**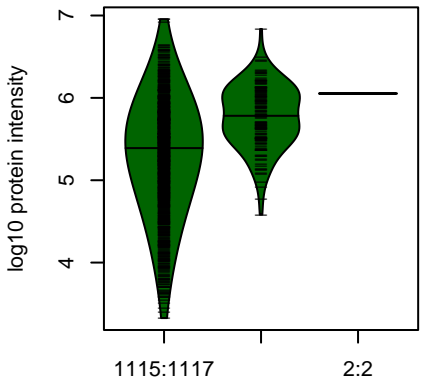

6:160997118:A:T\_T  
 p = 6e-21, beta = 0.799, N = 1258

**LFLEPTQADIALLK pc2**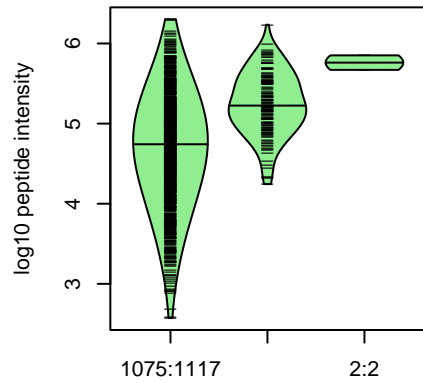

6:160997118:A:T\_T  
 p = 1.1e-26, beta = 0.906, N = 1218

**TTEYYPNGGLTR pc2**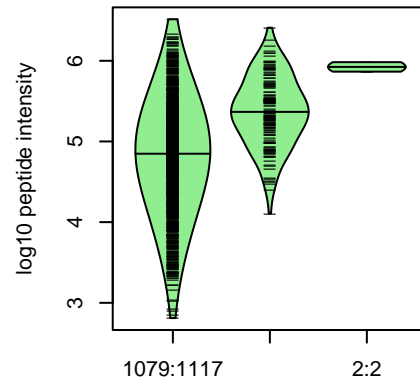

6:160997118:A:T\_T  
 p = 5.1e-26, beta = 0.895, N = 1222

**HFCGGTLISPEWVLTAAHCLKK pc2**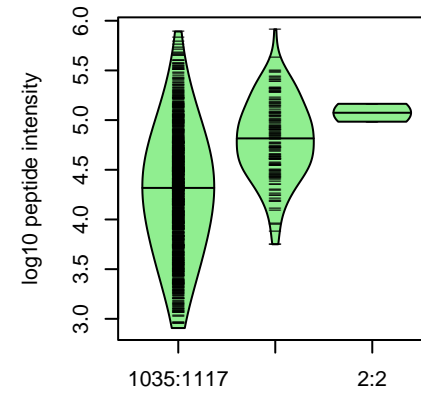

6:160997118:A:T\_T  
 p = 1.2e-25, beta = 0.892, N = 1177

**VMPACLPSPDYMTAR pc2**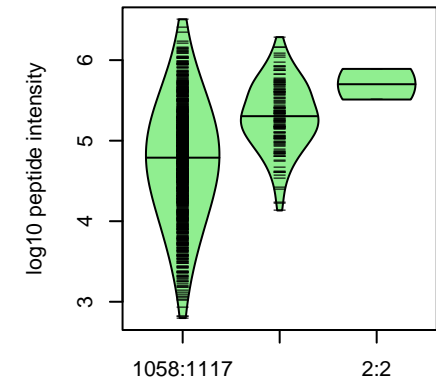

6:160997118:A:T\_T  
 p = 1.6e-24, beta = 0.868, N = 1201

**P08519 NP4**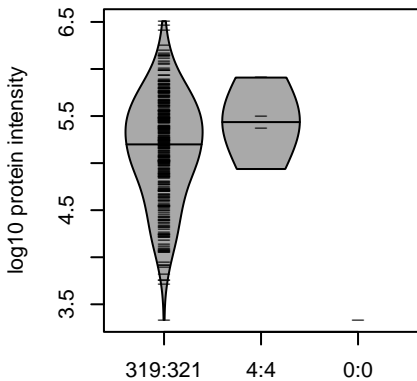

rs74617384  
 p = 0.55, beta = 0.296, N = 323

**GTLSTTITGR pc2**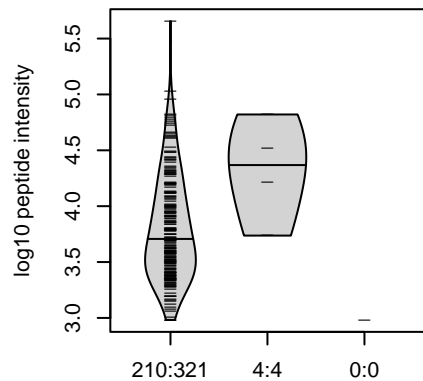

rs74617384  
 p = 0.053, beta = 0.957, N = 214

**ATTVTGTPCQEWAQEPHR pc3**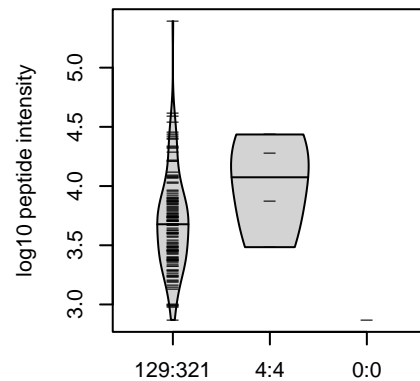

rs74617384  
 p = 0.067, beta = 0.903, N = 133

**TTEYYPNGGLTR pc2**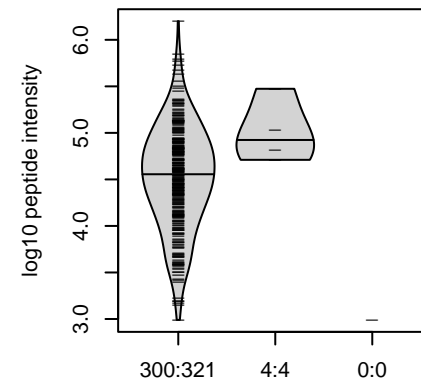

rs74617384  
 p = 0.093, beta = 0.834, N = 304

**GSFSTTVTGR pc2**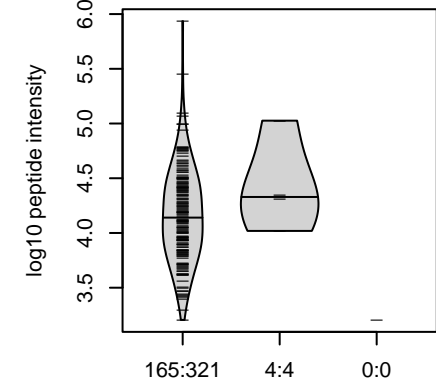

rs74617384  
 p = 0.13, beta = 0.756, N = 169

**NPDADTGPWCFTMDPSIR pc3  
rs1801693 REF**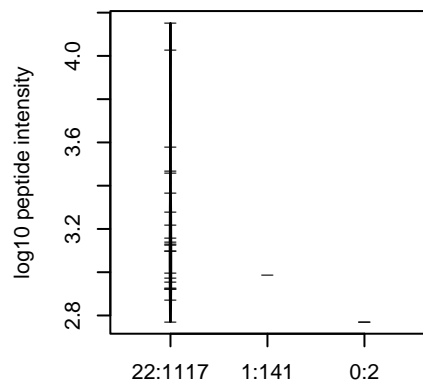

6:160997118:A:T\_T  
 p = 0.5, model = REC, N = 23

**YILQGVTSWGLGCAR pc2  
rs3124784 REF**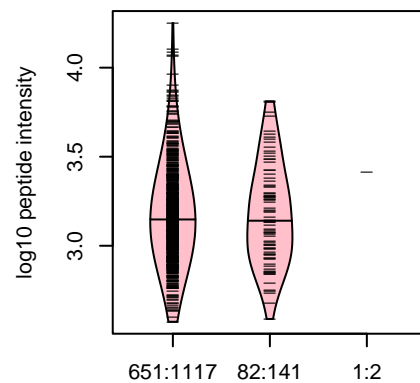

6:160997118:A:T\_T  
 p = 1, model = DOM, N = 734

Locus: 79 (Sort: 95)  
 Status: Not replicated  
 80% power: Yes  
 SNP: 6:160997118:A:T  
 rsID: rs74617384  
 UniProtID: P08519  
 HGNC gene: LPA  
 Type: Cis-pQTL

**OAF [cis]**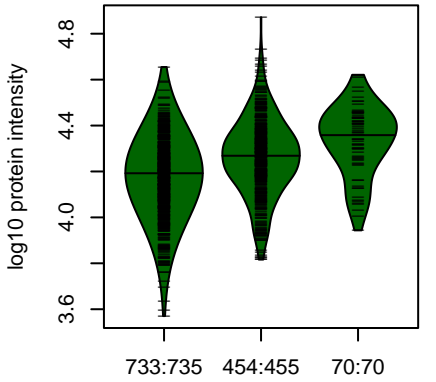

11:120101092:A:T\_A  
 $p = 6.9e-21$ ,  $\beta = 0.431$ ,  $N = 1257$

**SYSFDFYVPQR pc2**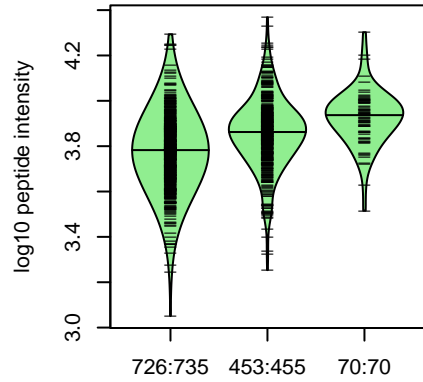

11:120101092:A:T\_A  
 $p = 1.5e-22$ ,  $\beta = 0.449$ ,  $N = 1249$

**ASEQAELPR pc2**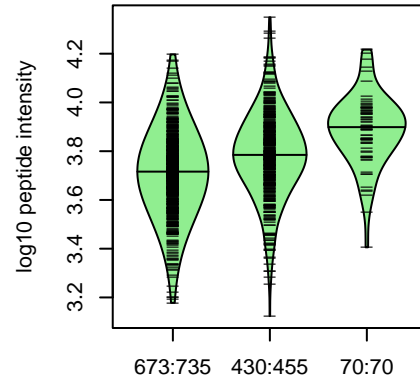

11:120101092:A:T\_A  
 $p = 2.3e-20$ ,  $\beta = 0.435$ ,  $N = 1173$

**ALILGELEK pc2**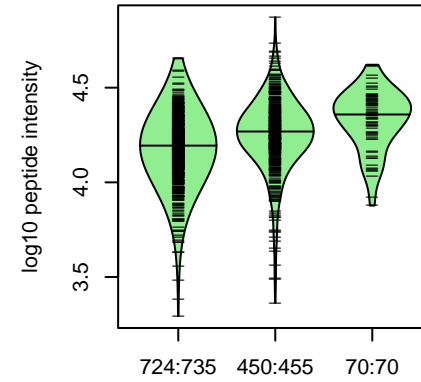

11:120101092:A:T\_A  
 $p = 3.2e-18$ ,  $\beta = 0.403$ ,  $N = 1244$

**KPDGTLVSFTADFK pc3**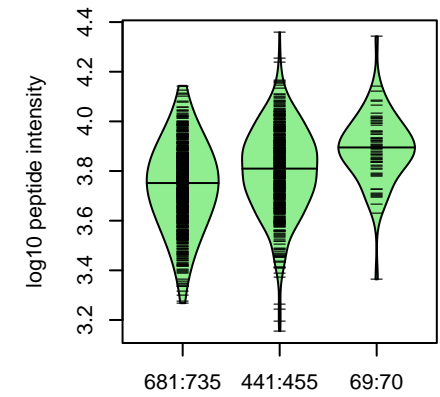

11:120101092:A:T\_A  
 $p = 1.1e-13$ ,  $\beta = 0.35$ ,  $N = 1191$

**Q86UD1 NP5**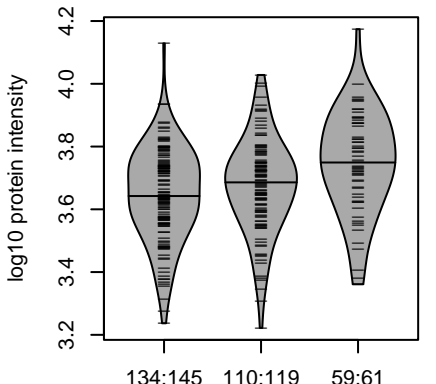

rs2845705  
 $p = 0.00066$ ,  $\beta = 0.254$ ,  $N = 303$

**ALILGELEK pc2**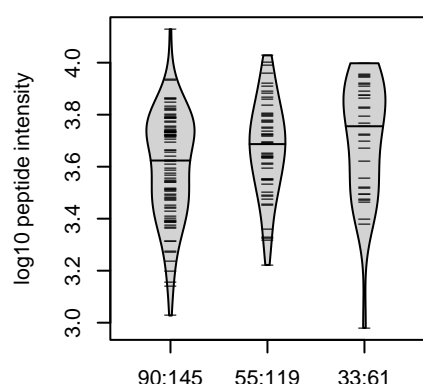

rs2845705  
 $p = 0.011$ ,  $\beta = 0.242$ ,  $N = 178$

**SYSFDFYVPQR pc2**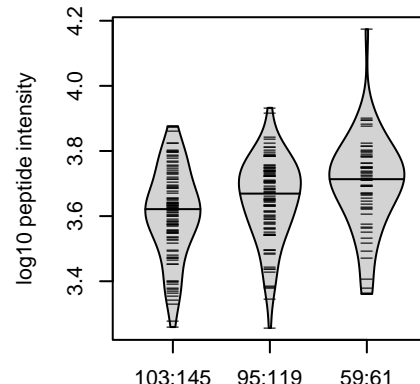

rs2845705  
 $p = 0.012$ ,  $\beta = 0.198$ ,  $N = 257$

**ASEQAELPR pc2**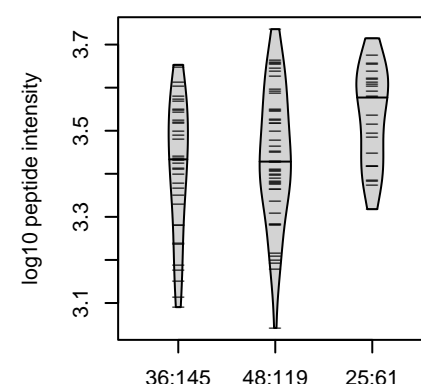

rs2845705  
 $p = 0.024$ ,  $\beta = 0.28$ ,  $N = 109$

**KPDGTLVSFTADFK pc3**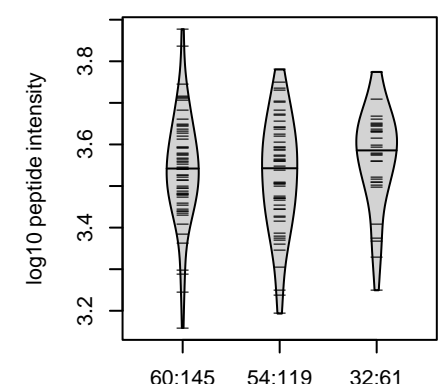

rs2845705  
 $p = 0.61$ ,  $\beta = 0.053$ ,  $N = 146$

**YGLSLAWYPCMLK pc2  
rs2508490 REF**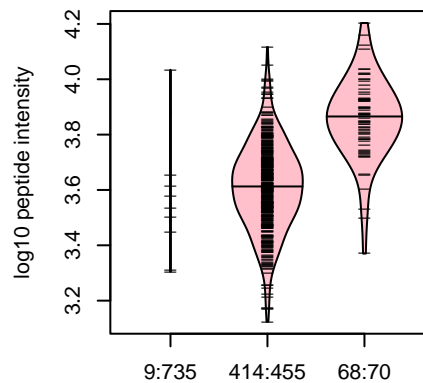

11:120101092:A:T\_A  
 $p = 2.5e-281$ ,  $\text{model} = \text{REC}$ ,  $N = 491$

Locus: 80 (Sort: 96)  
 Status: Not replicated  
 80% power: Yes  
 SNP: 11:120101092:A:T  
 rsID: rs2845705  
 UniProtID: Q86UD1  
 HGNC gene: OAF  
 Type: Cis-pQTL

**CTSH [cis]**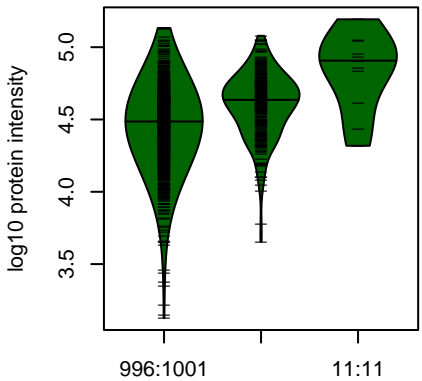

15:79229232:A:G\_G  
 $p = 8.3e-21$ ,  $\beta = 0.6$ ,  $N = 1253$

**MALNQFSDMSFAEIK pc2**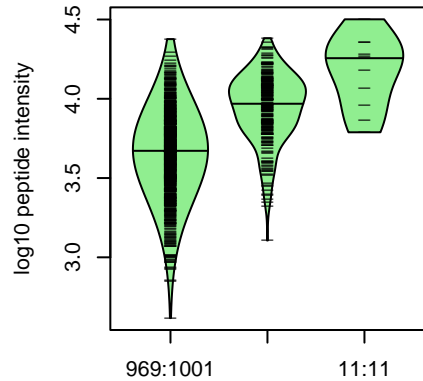

15:79229232:A:G\_G  
 $p = 1.7e-63$ ,  $\beta = 1.04$ ,  $N = 1226$

**LQTFASNWR pc2**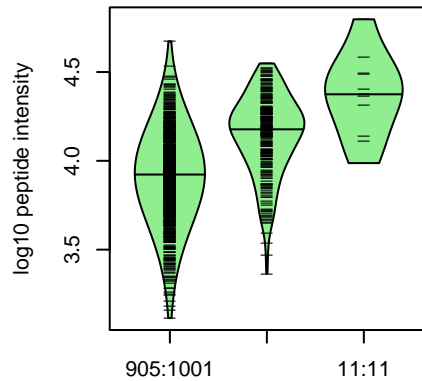

15:79229232:A:G\_G  
 $p = 1.6e-47$ ,  $\beta = 0.92$ ,  $N = 1156$

**TGIYSSTSCHK pc2**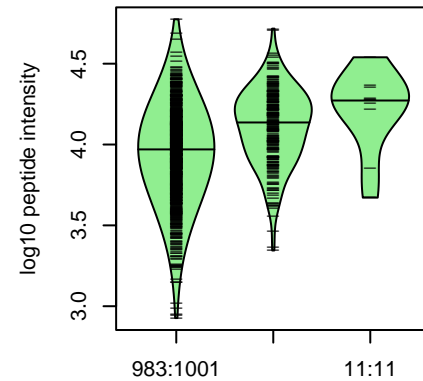

15:79229232:A:G\_G  
 $p = 3.8e-21$ ,  $\beta = 0.606$ ,  $N = 1240$

**NQGACGSCWTFSTTGALESAIAIATGK**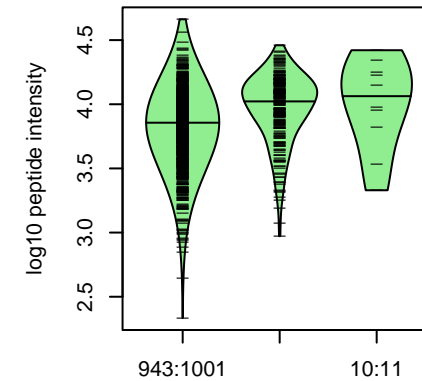

15:79229232:A:G\_G  
 $p = 2.7e-15$ ,  $\beta = 0.52$ ,  $N = 1193$

**A0A087X0D5 NP3**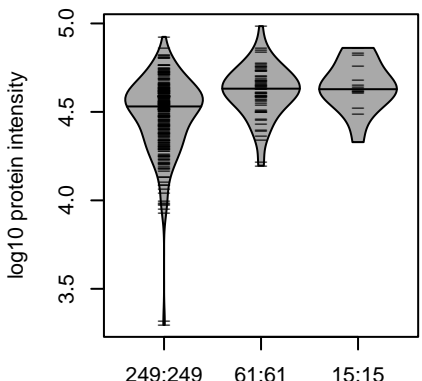

rs111495139  
 $p = 2.3e-06$ ,  $\beta = 0.464$ ,  $N = 325$

**MALNQFSDMSFAEIK pc2**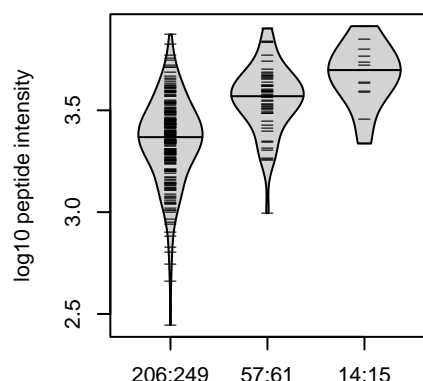

rs111495139  
 $p = 7.9e-16$ ,  $\beta = 0.805$ ,  $N = 277$

**LQTFASNWR pc2**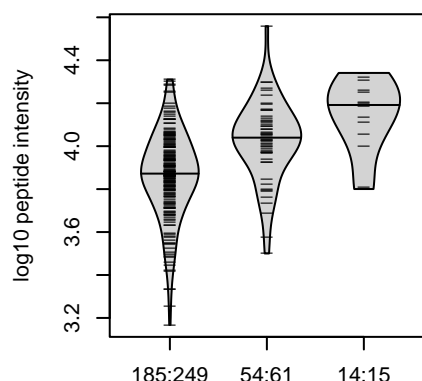

rs111495139  
 $p = 1.8e-11$ ,  $\beta = 0.694$ ,  $N = 253$

**VNHAFLAVGYGEK pc3**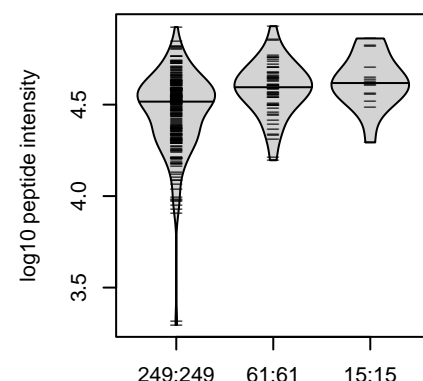

rs111495139  
 $p = 6.8e-06$ ,  $\beta = 0.448$ ,  $N = 325$

**GIMGEDTYPYQGK pc2**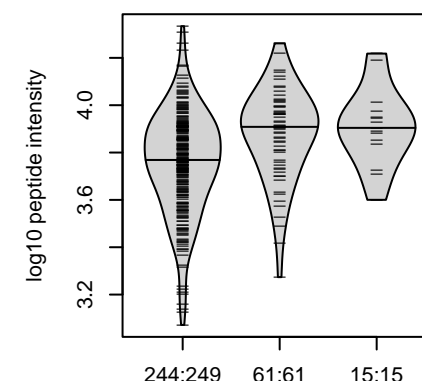

rs111495139  
 $p = 0.00013$ ,  $\beta = 0.383$ ,  $N = 320$

Locus: 81 (Sort: 97)  
 Status: Replicated  
 80% power: Yes  
 SNP: 15:79229232:A:G  
 rsID: rs111495139  
 UniProtID: A0A087X0D5  
 HGNC gene: CTSH  
 Type: Cis-pQTL



**PLEC [cis]**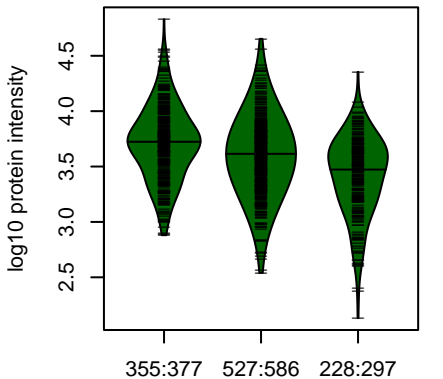

8:145001031:T:C\_C  
 $p = 1.4e-20$ ,  $\beta = -0.381$ ,  $N = 1110$

**LGFHLPLEVAYQR pc3**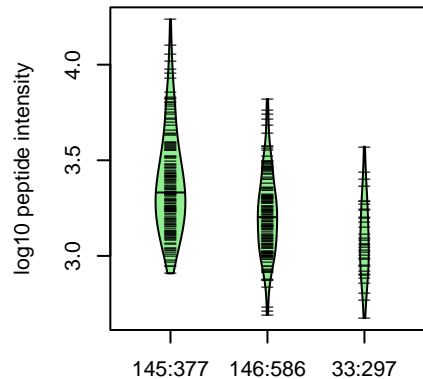

8:145001031:T:C\_C  
 $p = 2e-12$ ,  $\beta = -0.567$ ,  $N = 324$

**SSIAGLLLK pc2**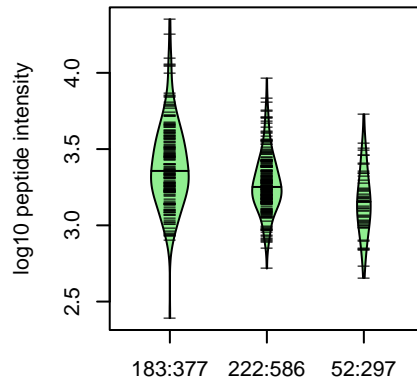

8:145001031:T:C\_C  
 $p = 6.5e-12$ ,  $\beta = -0.472$ ,  $N = 457$

**AQLEPVASPAK pc2**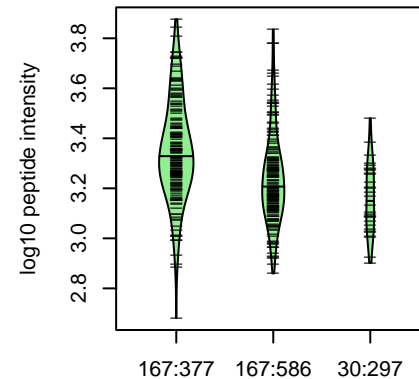

8:145001031:T:C\_C  
 $p = 7.7e-10$ ,  $\beta = -0.492$ ,  $N = 364$

**ELIPTEEALR pc2**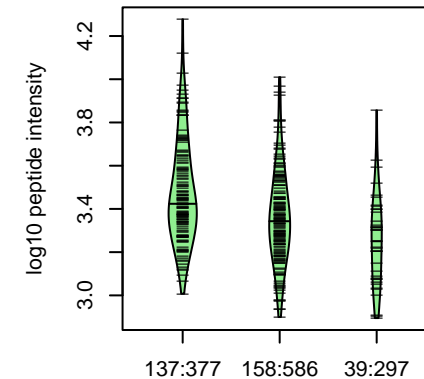

8:145001031:T:C\_C  
 $p = 6.8e-09$ ,  $\beta = -0.46$ ,  $N = 334$

**Q15149 NP5**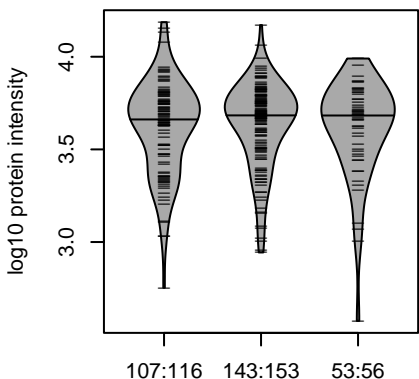

rs55895668  
 $p = 0.4$ ,  $\beta = -0.0645$ ,  $N = 325$

**NQGACGSCWTFSTTGALESAIATGK**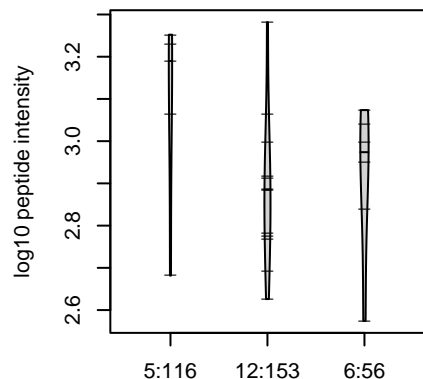

rs55895668  
 $p = 0.34$ ,  $\beta = -0.268$ ,  $N = 23$

**GNFVSPVK pc2**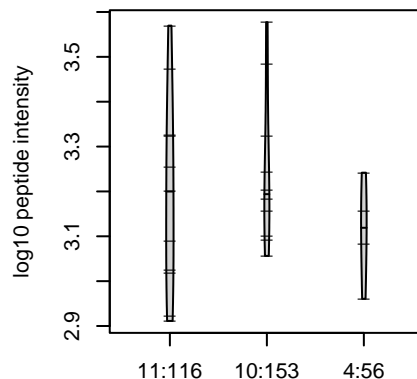

rs55895668  
 $p = 0.63$ ,  $\beta = -0.125$ ,  $N = 25$

**GIMGEDTYPYQGK pc2**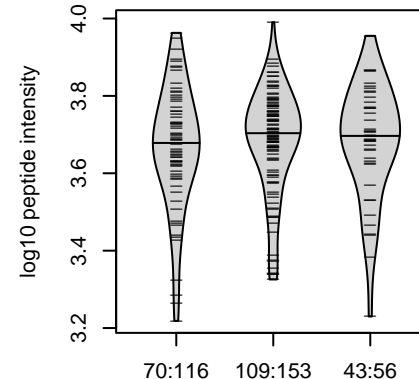

rs55895668  
 $p = 0.72$ ,  $\beta = 0.0332$ ,  $N = 222$

**VNHAVLAVGYGEK pc3**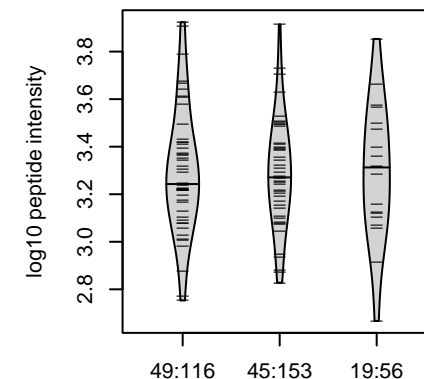

rs55895668  
 $p = 0.74$ ,  $\beta = -0.0424$ ,  $N = 113$

**GYFDEEMNR pc2  
rs6558407 REF**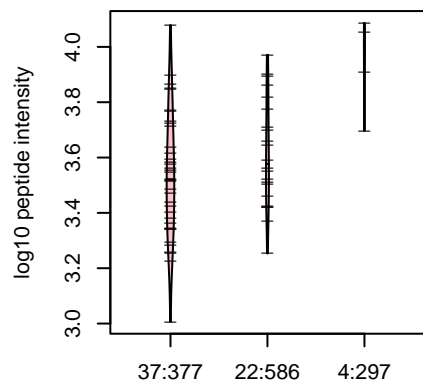

8:145001031:T:C\_C  
 $p = 1.4e-06$ ,  $\text{model} = \text{REC}$ ,  $N = 63$

Locus: 82 (Sort: 98)  
 Status: Not replicated  
 80% power: Yes  
 SNP: 8:145001031:T:C  
 rsID: rs55895668  
 UniProtID: Q15149  
 HGNC gene: PLEC  
 Type: Cis-pQTL

**PON1 [cis]**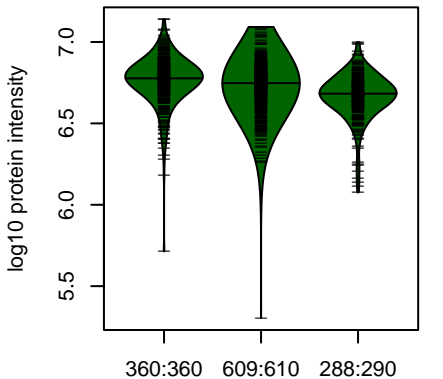

7:94953895:G:A\_A  
 $p = 3.2e-20$ ,  $\beta = -0.356$ ,  $N = 1257$

**SFNPNSPGK pc2**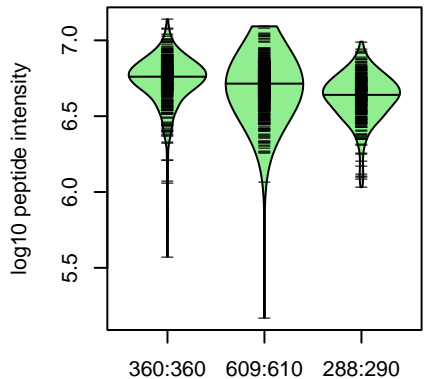

7:94953895:G:A\_A  
 $p = 2.6e-22$ ,  $\beta = -0.374$ ,  $N = 1257$

**YVYIAELLAHK pc3**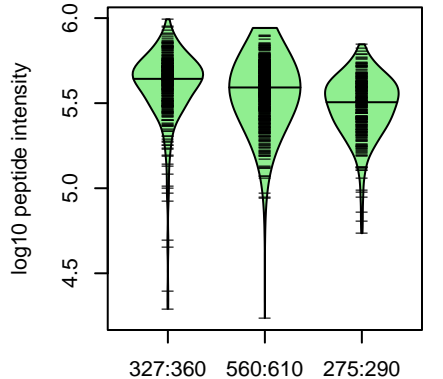

7:94953895:G:A\_A  
 $p = 1.5e-19$ ,  $\beta = -0.361$ ,  $N = 1162$

**VTQVYAENGTVLQGSTVASVYK pc**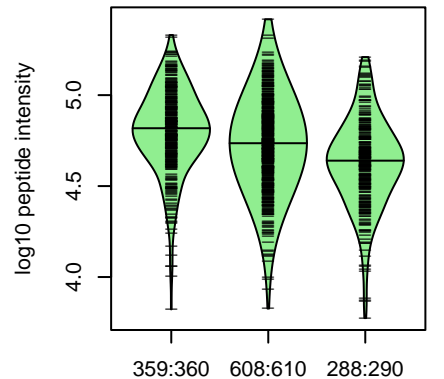

7:94953895:G:A\_A  
 $p = 6.3e-18$ ,  $\beta = -0.334$ ,  $N = 1255$

**EVQPVELPNCNLVK pc2**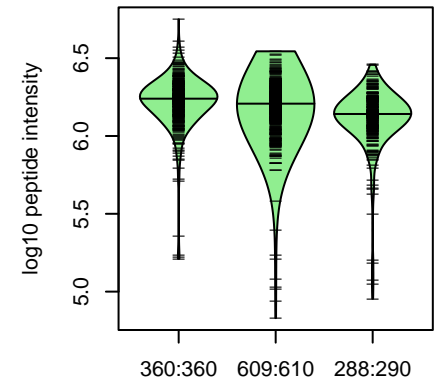

7:94953895:G:A\_A  
 $p = 8.7e-18$ ,  $\beta = -0.332$ ,  $N = 1257$

**P27169 NP5**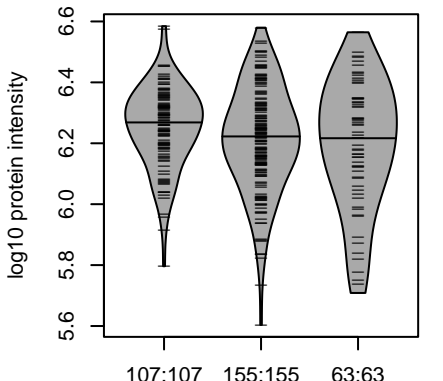

rs705379  
 $p = 0.088$ ,  $\beta = -0.129$ ,  $N = 325$

**VVAEGDFDFANGINISPDGK pc2**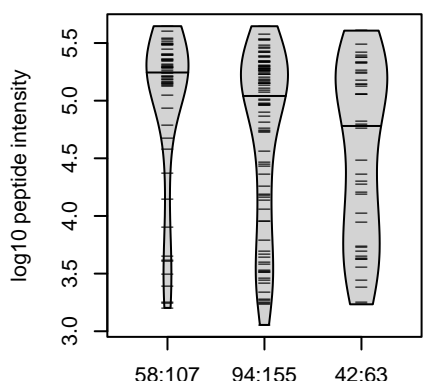

rs705379  
 $p = 0.0022$ ,  $\beta = -0.299$ ,  $N = 194$

**ILLMDLNEEDPTVLELGITGSK pc3**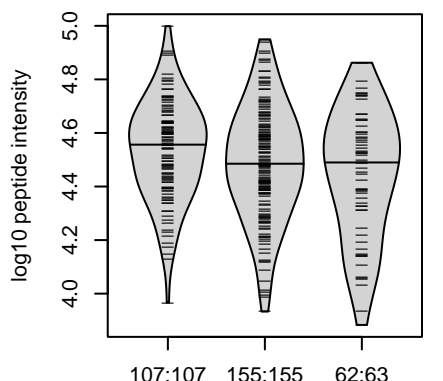

rs705379  
 $p = 0.0081$ ,  $\beta = -0.204$ ,  $N = 324$

**STVELFK pc2**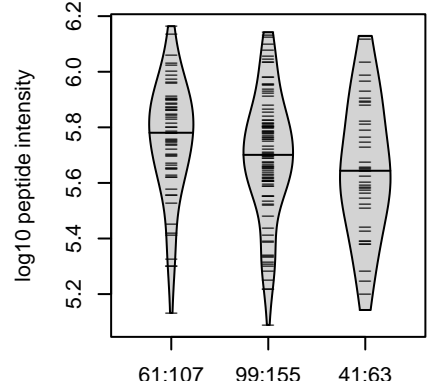

rs705379  
 $p = 0.029$ ,  $\beta = -0.214$ ,  $N = 201$

**EVQPVELPNCNLVK pc2**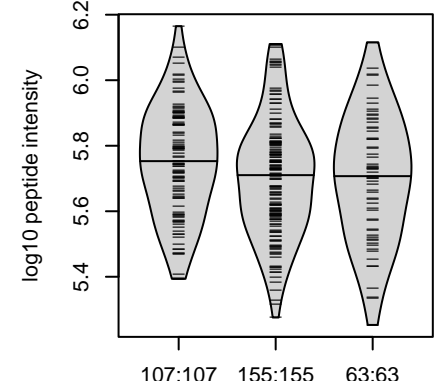

rs705379  
 $p = 0.04$ ,  $\beta = -0.158$ ,  $N = 325$

**GIETGSEDMEILPNGLAFISSGLK pc  
CM971236 ALT**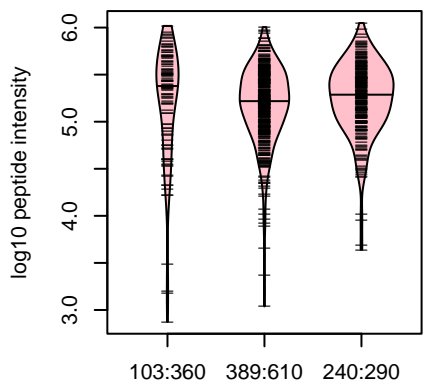

7:94953895:G:A\_A  
 $p = 4.4e-41$ ,  $\text{model} = \text{REC}$ ,  $N = 732$

**GIETGSEDLEILPNGLAFISSGLK pc  
CM971236 REF**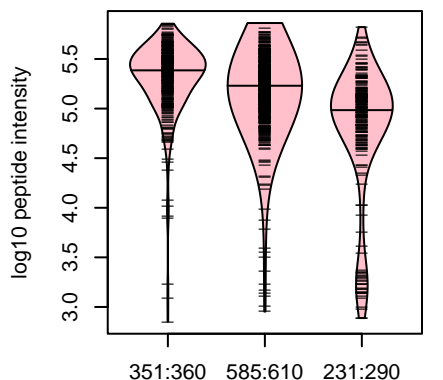

7:94953895:G:A\_A  
 $p = 3.3e-18$ ,  $\text{model} = \text{DOM}$ ,  $N = 1167$

**PNLNDIVAVGPEHFYGTNDHYFLDPYL  
rs662 ALT**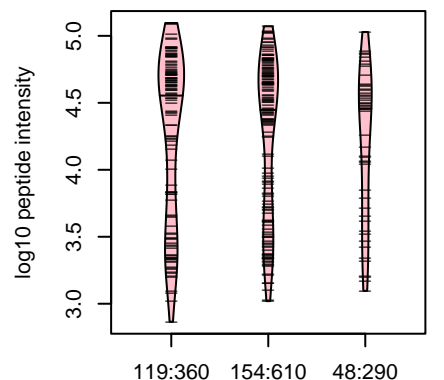

7:94953895:G:A\_A  
 $p = 6e-05$ ,  $\text{model} = \text{DOM}$ ,  $N = 321$

Locus: 83 (Sort: 99)  
 Status: Not replicated  
 80% power: Yes  
 SNP: 7:94953895:G:A  
 rsID: rs705379  
 UniProtID: P27169  
 HGNC gene: PON1  
 Type: Cis-pQTL

**DYNC1H1 [trans]**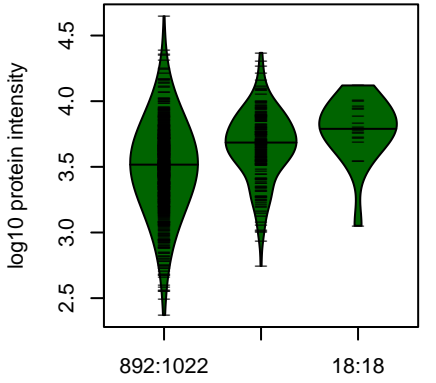

1:248039294:G:A\_A  
 $p = 7.4e-20$ ,  $\beta = 0.598$ ,  $N = 1111$

**VNFLPEIITLSK pc2**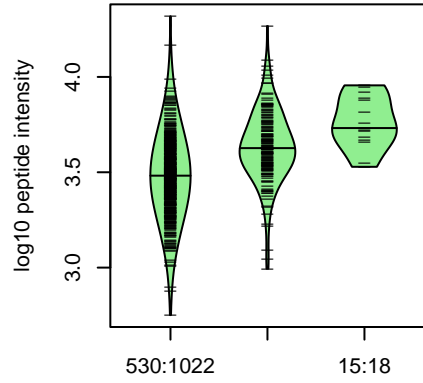

1:248039294:G:A\_A  
 $p = 8.2e-26$ ,  $\beta = 0.775$ ,  $N = 703$

**SLLQALNEVK pc2**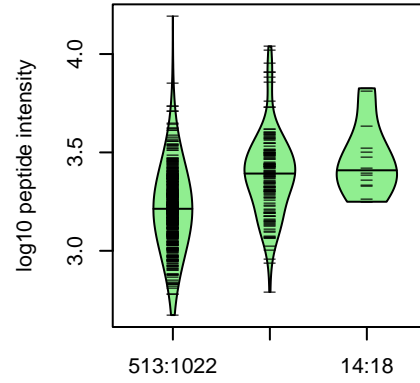

1:248039294:G:A\_A  
 $p = 3.5e-24$ ,  $\beta = 0.777$ ,  $N = 671$

**LSLSNAISTALPLTQLR pc2**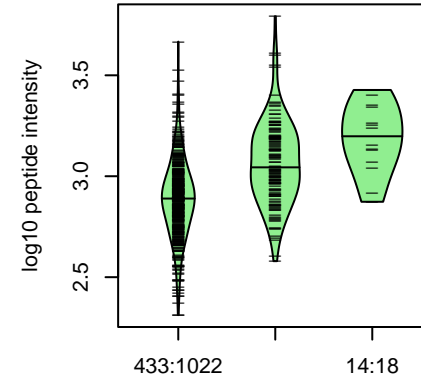

1:248039294:G:A\_A  
 $p = 6.6e-23$ ,  $\beta = 0.773$ ,  $N = 586$

**MVVLSLPR pc2**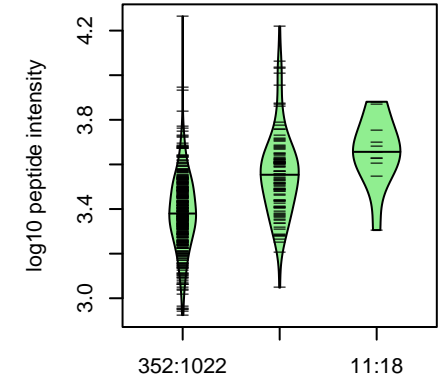

1:248039294:G:A\_A  
 $p = 1.2e-19$ ,  $\beta = 0.799$ ,  $N = 471$

**Q14204 NP4**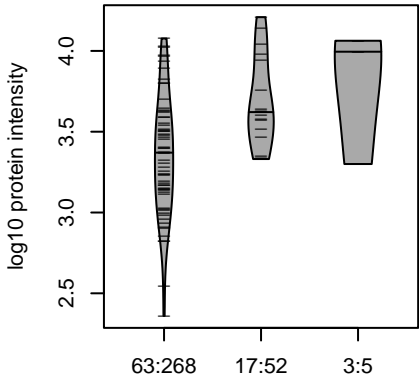

rs1339847  
 $p = 3e-04$ ,  $\beta = 0.72$ ,  $N = 83$

**LSLSNAISTALPLTQLR pc2**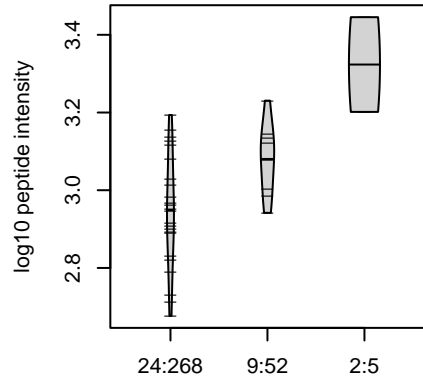

rs1339847  
 $p = 0.00054$ ,  $\beta = 0.858$ ,  $N = 35$

**FQSISTEFLALMK pc2**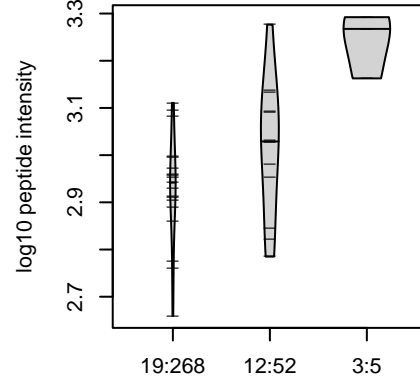

rs1339847  
 $p = 0.00063$ ,  $\beta = 0.777$ ,  $N = 34$

**SLLQALNEVK pc2**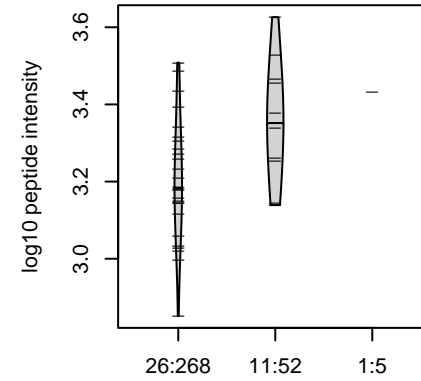

rs1339847  
 $p = 0.0069$ ,  $\beta = 0.751$ ,  $N = 38$

**VEPAVIEAQNNAVK pc2**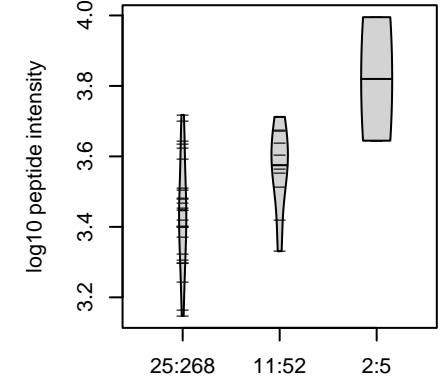

rs1339847  
 $p = 0.0079$ ,  $\beta = 0.664$ ,  $N = 38$

Locus: 84 (Sort: 100)  
 Status: Not replicated  
 80% power: No  
 SNP: 1:248039294:G:A  
 rsID: rs1339847  
 UniProtID: Q14204  
 HGNC gene: DYNC1H1  
 Type: Trans-pQTL

**C6 [cis]**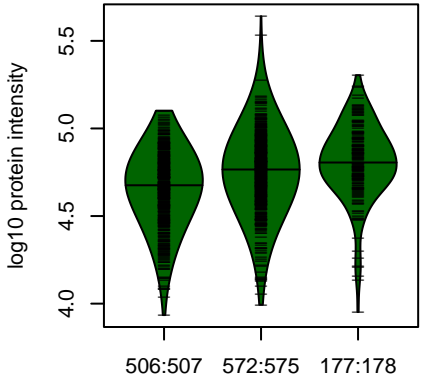

5:41199012:G:T\_G  
 $p = 8.1e-20$ ,  $\beta = 0.365$ ,  $N = 1255$

**ECNNPAPQR pc2**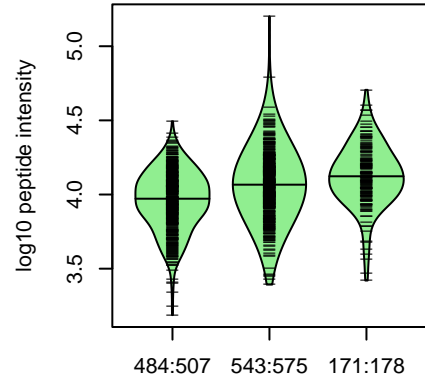

5:41199012:G:T\_G  
 $p = 1.9e-23$ ,  $\beta = 0.407$ ,  $N = 1198$

**NSGLTEEEAK pc2**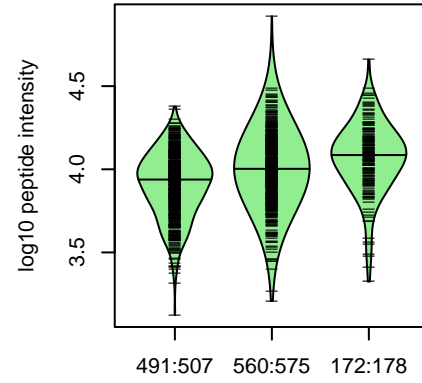

5:41199012:G:T\_G  
 $p = 2.1e-23$ ,  $\beta = 0.404$ ,  $N = 1223$

**TLNICEVGTIR pc2**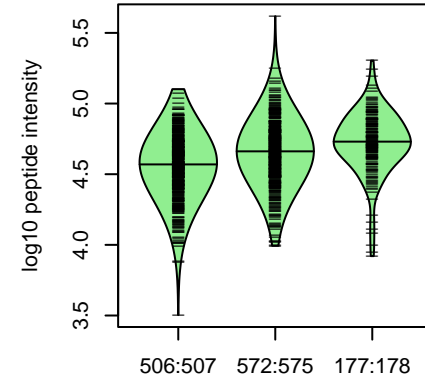

5:41199012:G:T\_G  
 $p = 9.8e-23$ ,  $\beta = 0.393$ ,  $N = 1255$

**IGESIELTCPK pc2**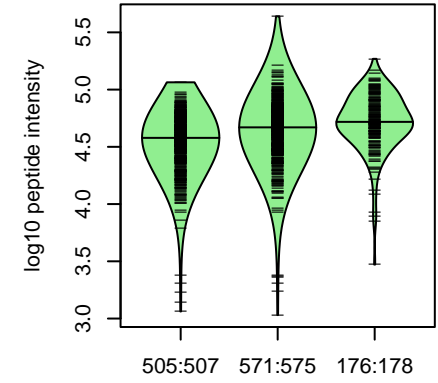

5:41199012:G:T\_G  
 $p = 2.2e-21$ ,  $\beta = 0.381$ ,  $N = 1252$

**P13671 NP3**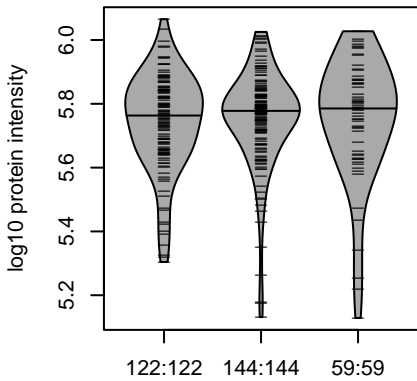

rs7443604  
 $p = 0.85$ ,  $\beta = 0.0147$ ,  $N = 325$

**GFVVAGPSR pc2**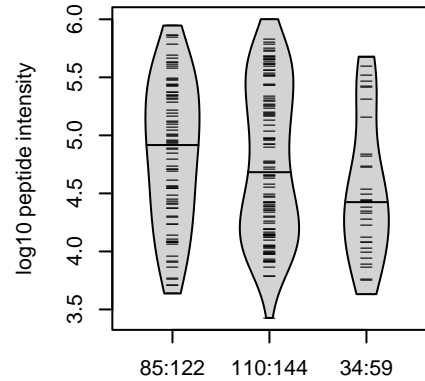

rs7443604  
 $p = 0.035$ ,  $\beta = -0.199$ ,  $N = 229$

**NIPCAVTK pc2**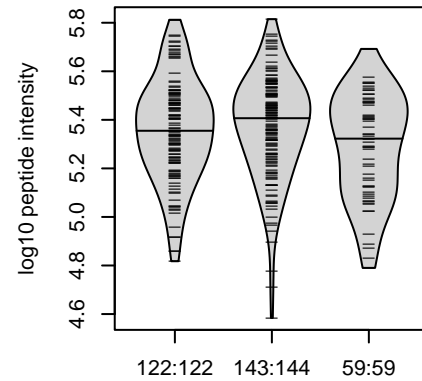

rs7443604  
 $p = 0.045$ ,  $\beta = -0.152$ ,  $N = 324$

**IEEADCK pc2**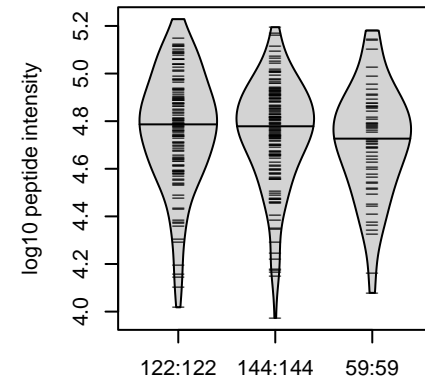

rs7443604  
 $p = 0.072$ ,  $\beta = -0.136$ ,  $N = 325$

**GSSGLEEK pc2**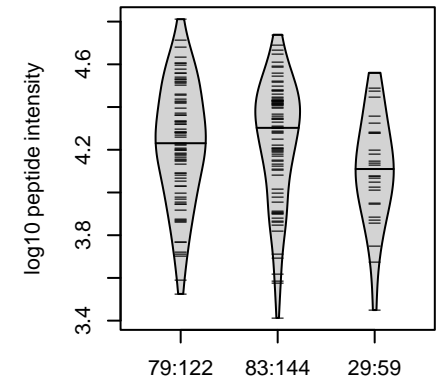

rs7443604  
 $p = 0.13$ ,  $\beta = -0.152$ ,  $N = 191$

Locus: 85 (Sort: 101)  
 Status: Not replicated  
 80% power: Yes  
 SNP: 5:41199012:G:T  
 rsID: rs7443604  
 UniProtID: P13671  
 HGNC gene: C6  
 Type: Cis-pQTL

**GALC [cis]**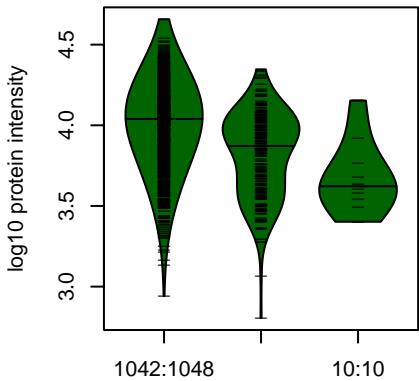

14:88478827:T:C\_C  
 $p = 1.3e-19$ ,  $\beta = -0.625$ ,  $N = 1252$

**SLWTDIPVNFPK pc2**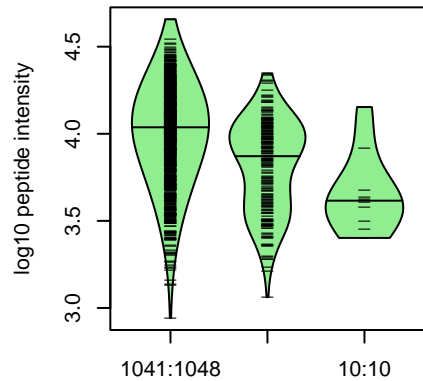

14:88478827:T:C\_C  
 $p = 1e-18$ ,  $\beta = -0.613$ ,  $N = 1249$

**GYEWWLMK pc2**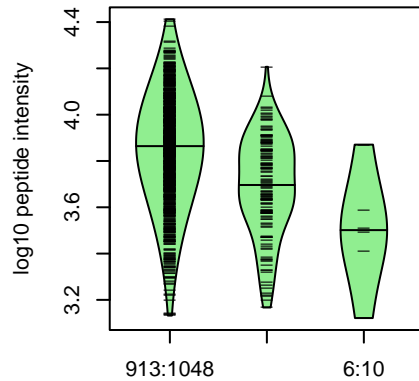

14:88478827:T:C\_C  
 $p = 3e-14$ ,  $\beta = -0.616$ ,  $N = 1065$

**GSFSEIPELQVWYTK pc2**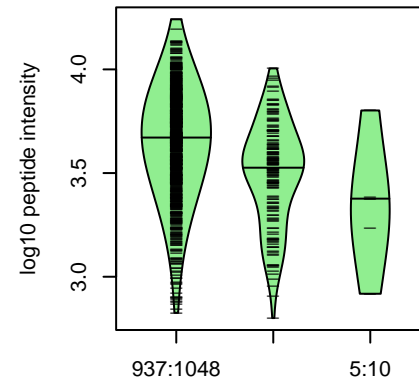

14:88478827:T:C\_C  
 $p = 1.4e-11$ ,  $\beta = -0.536$ ,  $N = 1103$

**SQFPSTYK pc2**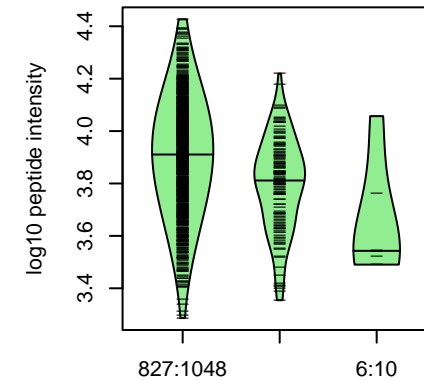

14:88478827:T:C\_C  
 $p = 1.4e-08$ ,  $\beta = -0.483$ ,  $N = 965$

**P54803 NP5**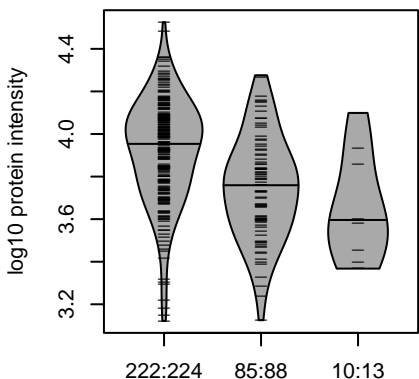

rs12434101  
 $p = 1.7e-09$ ,  $\beta = -0.616$ ,  $N = 317$

**SLWTDIPVNFPK pc2**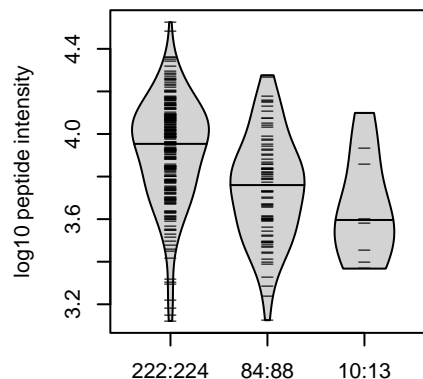

rs12434101  
 $p = 4.3e-09$ ,  $\beta = -0.596$ ,  $N = 316$

**VTGDLAGWIIYALGRVEVTAK pc3**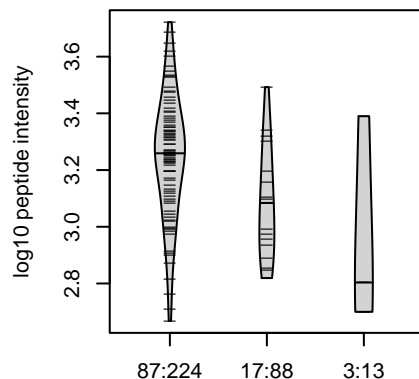

rs12434101  
 $p = 0.0078$ ,  $\beta = -0.52$ ,  $N = 107$

**CDVYIETPDTGGVFIAGR pc2**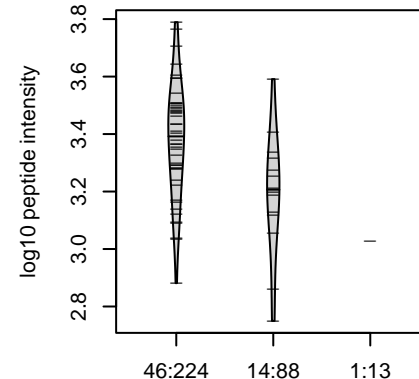

rs12434101  
 $p = 0.009$ ,  $\beta = -0.657$ ,  $N = 61$

**EIGGDGQTTDGTESHMHYALDENYF**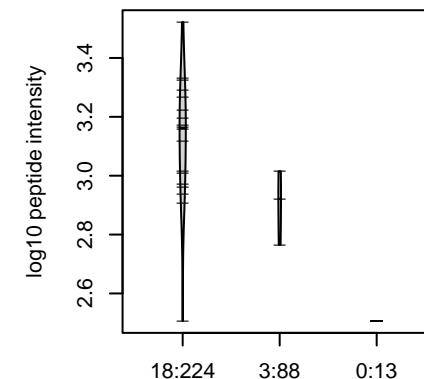

rs12434101  
 $p = 0.016$ ,  $\beta = -1.3$ ,  $N = 21$

**VVNVIGAHYPGTHSAK pc3  
rs34362748 ALT**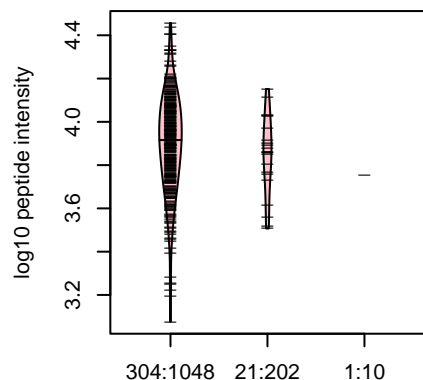

14:88478827:T:C\_C  
 $p = 1.8e-09$ ,  $\text{model} = \text{REC}$ ,  $N = 326$

**VVDVIGAHYPGTHSAK pc4  
rs34362748 REF**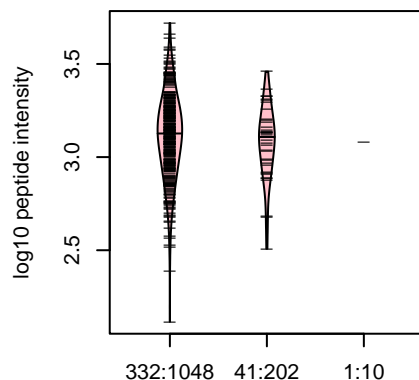

14:88478827:T:C\_C  
 $p = 0.00051$ ,  $\text{model} = \text{REC}$ ,  $N = 374$

Locus: 86 (Sort: 102)  
 Status: Replicated  
 80% power: Yes  
 SNP: 14:88478827:T:C  
 rsID: rs12434101  
 UniProtID: P54803  
 HGNC gene: GALC  
 Type: Cis-pQTL

**FBXO7 [cis]**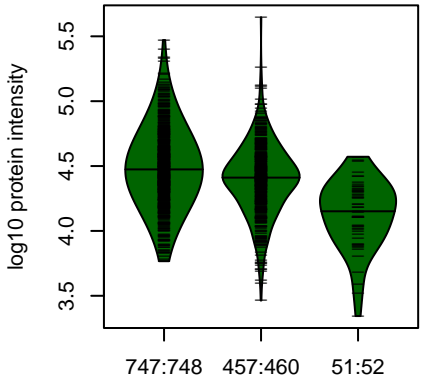

22:32871227:C:T\_T  
 $p = 1.7e-19$ ,  $\beta = -0.436$ ,  $N = 1255$

**DQLVYPLLAFTF pc2**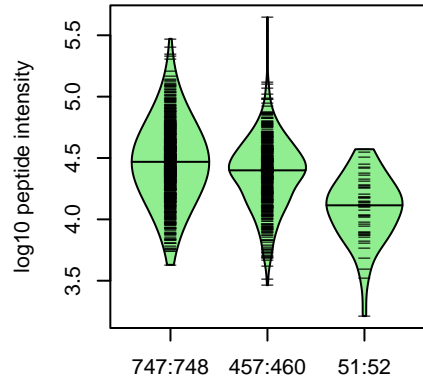

22:32871227:C:T\_T  
 $p = 3.2e-20$ ,  $\beta = -0.444$ ,  $N = 1255$

**DLFTASNDPLLWR pc2**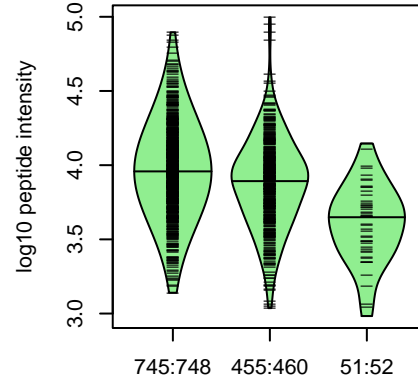

22:32871227:C:T\_T  
 $p = 1.8e-18$ ,  $\beta = -0.424$ ,  $N = 1251$

**SVLSLSAVCR pc2**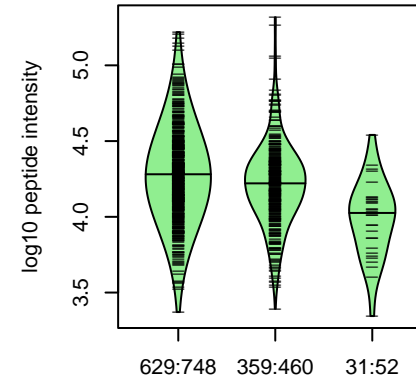

22:32871227:C:T\_T  
 $p = 9.5e-10$ ,  $\beta = -0.343$ ,  $N = 1019$

**VQDTDWK pc2**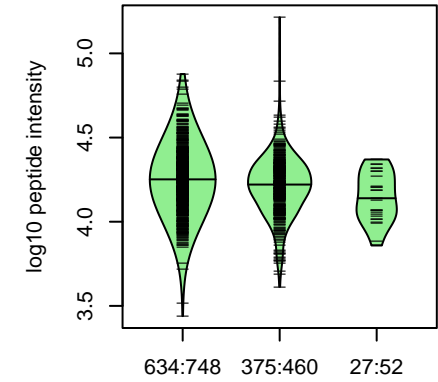

22:32871227:C:T\_T  
 $p = 4.9e-06$ ,  $\beta = -0.259$ ,  $N = 1036$

**Q9Y3I1 NP1**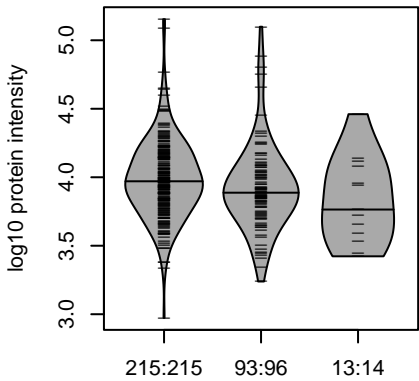

rs8136485  
 $p = 0.0048$ ,  $\beta = -0.279$ ,  $N = 321$

**DQLVYPLLAFTF pc2**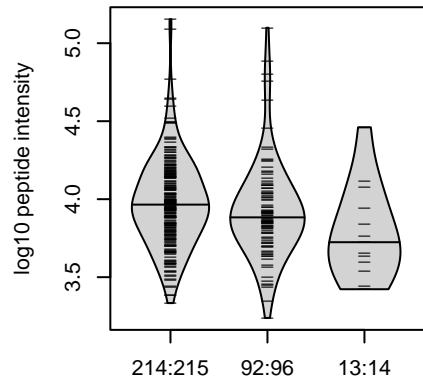

rs8136485  
 $p = 0.0066$ ,  $\beta = -0.267$ ,  $N = 319$

**DLFTASNDPLLWR pc2**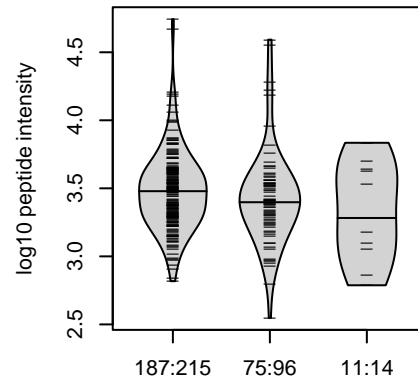

rs8136485  
 $p = 0.031$ ,  $\beta = -0.23$ ,  $N = 273$

**LQLLPESFICK pc2**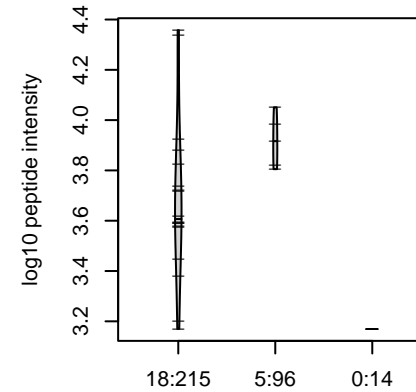

rs8136485  
 $p = 0.067$ ,  $\beta = 0.829$ ,  $N = 23$

**VQDTDWK pc2**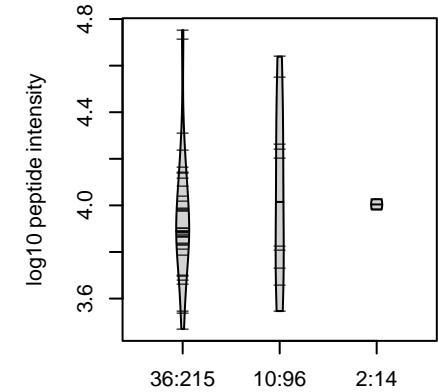

rs8136485  
 $p = 0.26$ ,  $\beta = 0.289$ ,  $N = 48$

Locus: 87 (Sort: 103)  
 Status: Not replicated  
 80% power: Yes  
 SNP: 22:32871227:C:T  
 rsID: rs8136485  
 UniProtID: Q9Y3I1  
 HGNC gene: FBXO7  
 Type: Cis-pQTL

**LPA [cis]**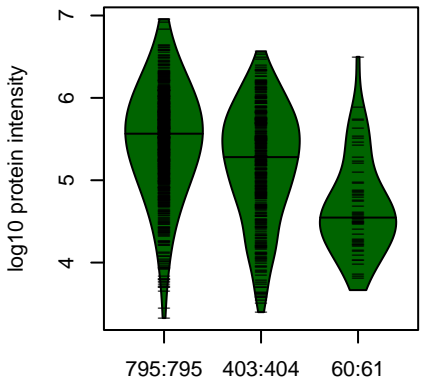

6:160986915:A:C\_A  
 $p = 2.3e-19$ ,  $\beta = -0.428$ ,  $N = 1258$

**LFLEPTQADIALLK pc2**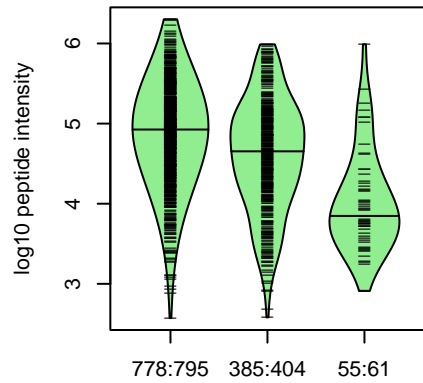

6:160986915:A:C\_A  
 $p = 1.8e-18$ ,  $\beta = -0.428$ ,  $N = 1218$

**GTYSTTVTGR pc2**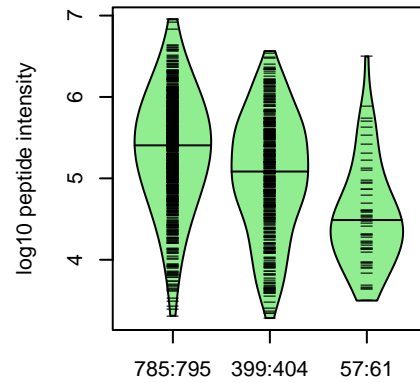

6:160986915:A:C\_A  
 $p = 4e-18$ ,  $\beta = -0.418$ ,  $N = 1241$

**NPDAVAAPYCYTR pc2**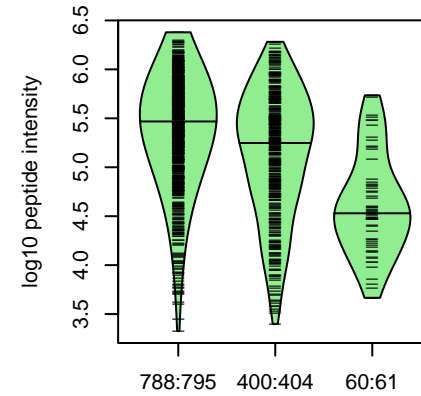

6:160986915:A:C\_A  
 $p = 3.1e-17$ ,  $\beta = -0.403$ ,  $N = 1248$

**EAQLLVIENEVCNHYK pc3**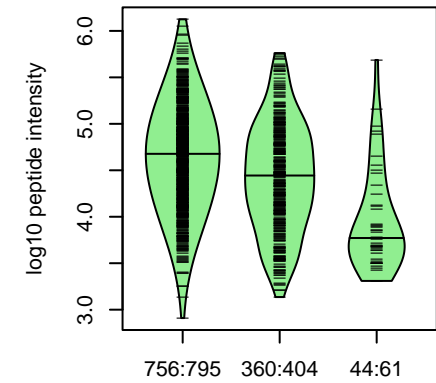

6:160986915:A:C\_A  
 $p = 4.1e-16$ ,  $\beta = -0.419$ ,  $N = 1160$

**P08519 NP4**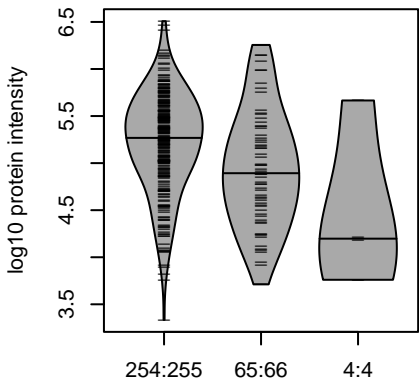

rs6938647  
 $p = 0.0011$ ,  $\beta = -0.395$ ,  $N = 323$

**NPDAVAAPYCYTR pc2**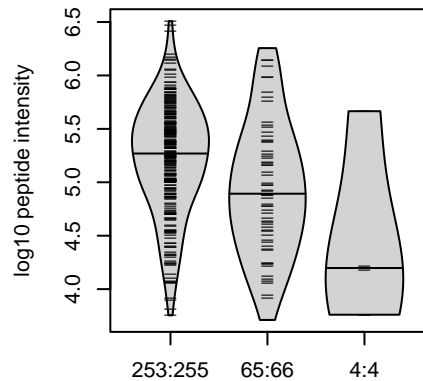

rs6938647  
 $p = 0.00075$ ,  $\beta = -0.411$ ,  $N = 322$

**TTEYYPNGGLTR pc2**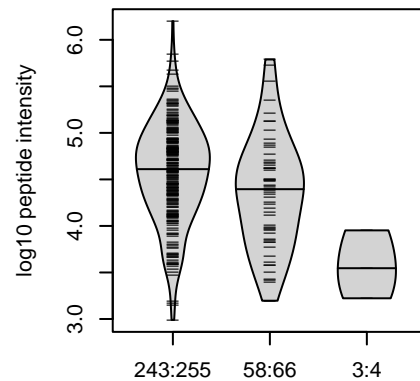

rs6938647  
 $p = 0.0024$ ,  $\beta = -0.396$ ,  $N = 304$

**TCQAWSSMTPHSHSR pc3**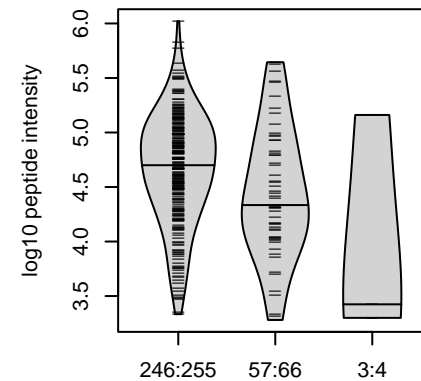

rs6938647  
 $p = 0.012$ ,  $\beta = -0.33$ ,  $N = 306$

**LFLEPTQADIALLK pc2**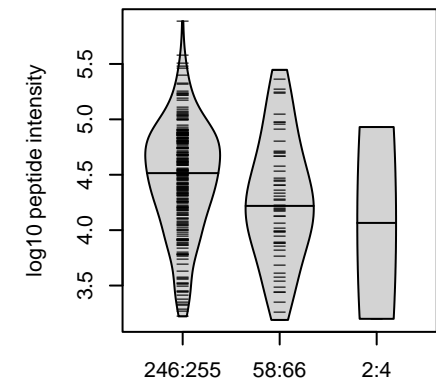

rs6938647  
 $p = 0.025$ ,  $\beta = -0.301$ ,  $N = 306$

**YILQGVTSWGLGCAR pc2  
rs3124784 REF**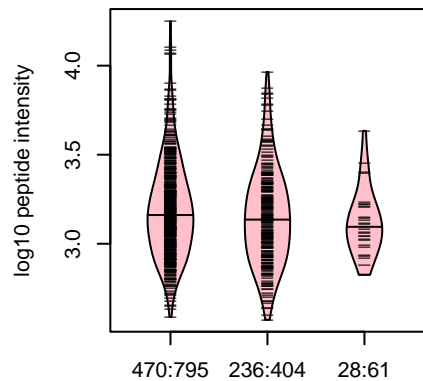

6:160986915:A:C\_A  
 $p = 0.047$ ,  $\text{model} = \text{DOM}$ ,  $N = 734$

**NPADTGPWCFTMDPSIR pc3  
rs1801693 REF**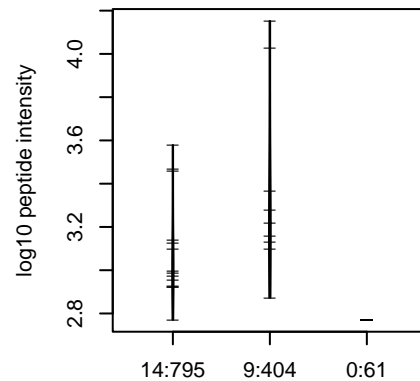

6:160986915:A:C\_A  
 $p = 0.62$ ,  $\text{model} = \text{DOM}$ ,  $N = 23$

Locus: 88 (Sort: 104)  
 Status: Not replicated  
 80% power: Yes  
 SNP: 6:160986915:A:C  
 rsID: rs6938647  
 UniProtID: P08519  
 HGNC gene: LPA  
 Type: Cis-pQTL

**MASP2 [cis]**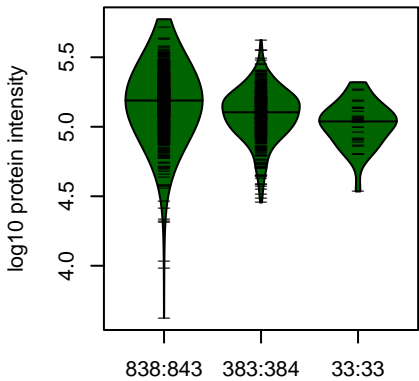

1:11104845:T:C\_T  
 $p = 3.3e-19$ ,  $\beta = -0.467$ ,  $N = 1254$

**RTCSEQSL pc2**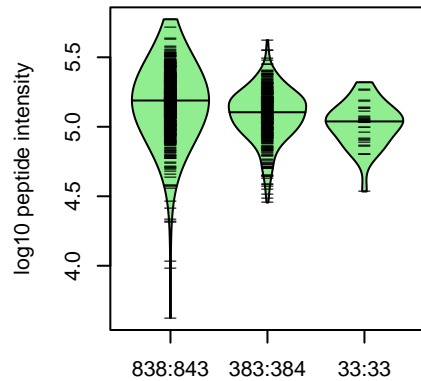

1:11104845:T:C\_T  
 $p = 3.3e-19$ ,  $\beta = -0.467$ ,  $N = 1254$

**VLATLCGQESTDTER pc2**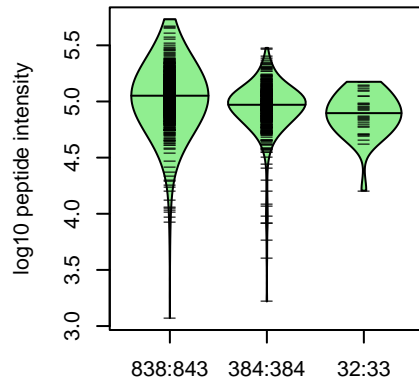

1:11104845:T:C\_T  
 $p = 7.5e-18$ ,  $\beta = -0.45$ ,  $N = 1254$

**WPEPVFGR pc2**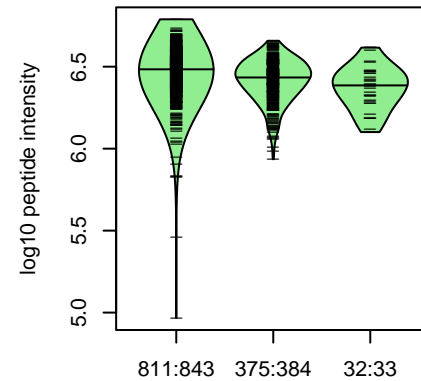

1:11104845:T:C\_T  
 $p = 4.5e-14$ ,  $\beta = -0.4$ ,  $N = 1218$

**SDYSNEK pc2**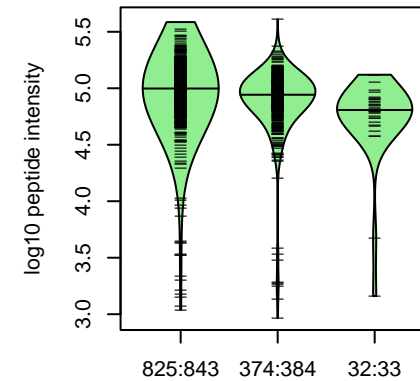

1:11104845:T:C\_T  
 $p = 1.1e-13$ ,  $\beta = -0.393$ ,  $N = 1231$

**O00187 NP2**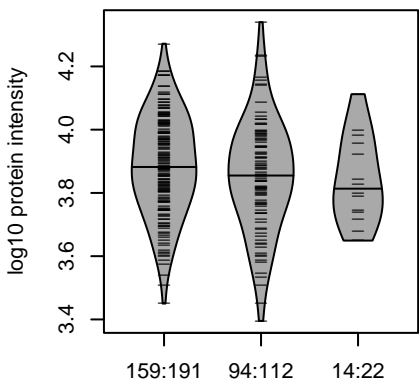

rs9430347  
 $p = 0.086$ ,  $\beta = -0.17$ ,  $N = 267$

**WLTAPPGYR pc2**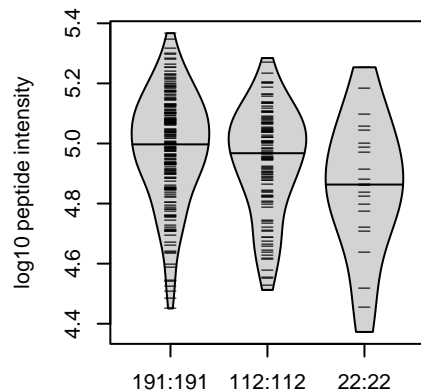

rs9430347  
 $p = 0.00046$ ,  $\beta = -0.307$ ,  $N = 325$

**WPEPVFGR pc2**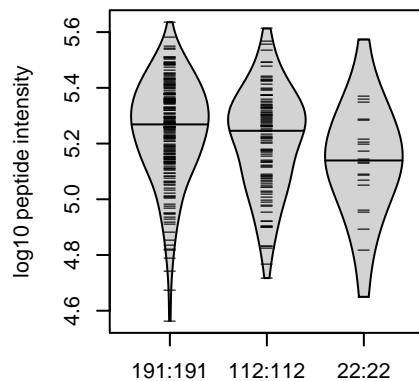

rs9430347  
 $p = 0.0082$ ,  $\beta = -0.232$ ,  $N = 325$

**DTFYSLGSSLDITFR pc2**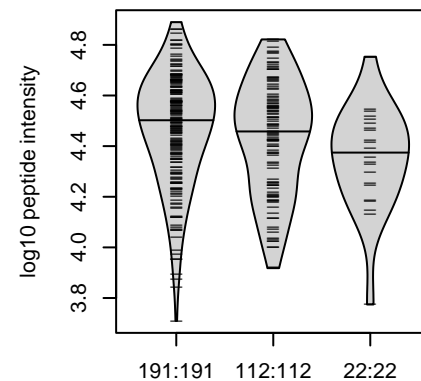

rs9430347  
 $p = 0.014$ ,  $\beta = -0.216$ ,  $N = 325$

**LASPGFPGEYANDQERR pc3**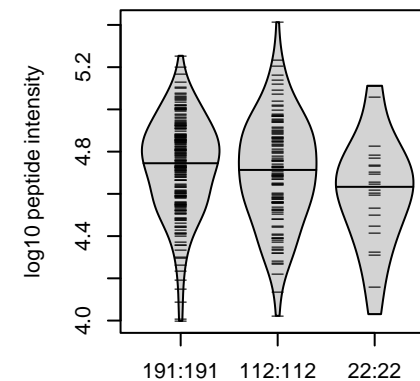

rs9430347  
 $p = 0.044$ ,  $\beta = -0.177$ ,  $N = 325$

Locus: 89 (Sort: 105)  
 Status: Not replicated  
 80% power: No  
 SNP: 1:11104845:T:C  
 rsID: rs9430347  
 UniProtID: O00187  
 HGNC gene: MASP2  
 Type: Cis-pQTL



**MASP2 [cis]**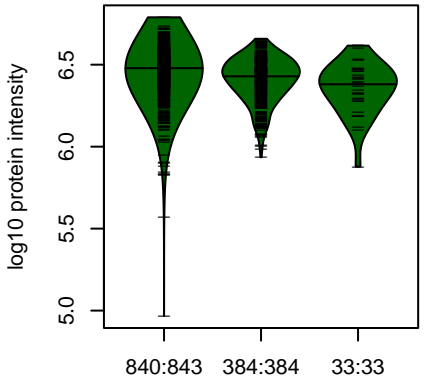

1:11104845:T:C\_T  
 $p = 5.7e-13$ ,  $\beta = -0.377$ ,  $N = 1257$

**NLMYVDIPIVDHQQ pc3**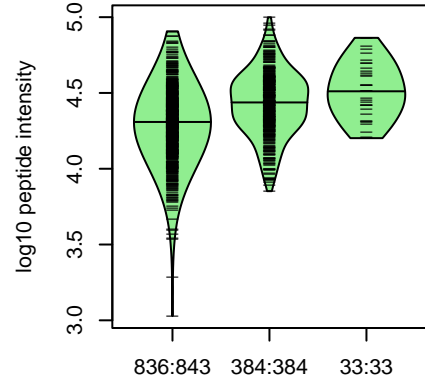

1:11104845:T:C\_T  
 $p = 1.4e-26$ ,  $\beta = 0.552$ ,  $N = 1253$

**SLPVCEPVCGLSAR pc2**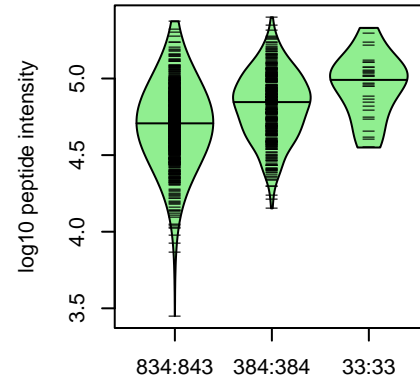

1:11104845:T:C\_T  
 $p = 1.9e-23$ ,  $\beta = 0.518$ ,  $N = 1251$

**RTCSEQSL pc2**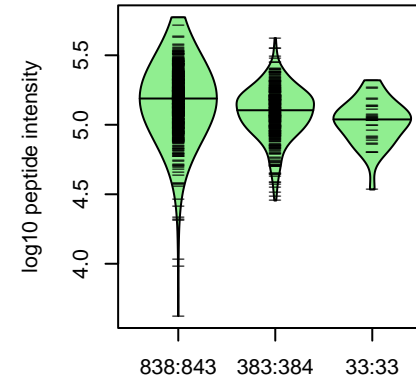

1:11104845:T:C\_T  
 $p = 3.3e-19$ ,  $\beta = -0.467$ ,  $N = 1254$

**VLATLCGQESTDTER pc2**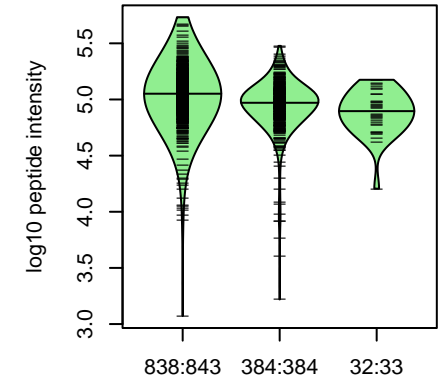

1:11104845:T:C\_T  
 $p = 7.5e-18$ ,  $\beta = -0.45$ ,  $N = 1254$

**O00187 NP2**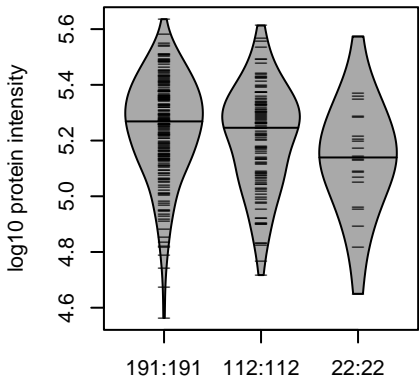

rs9430347  
 $p = 0.0071$ ,  $\beta = -0.237$ ,  $N = 325$

**VEYITGPGVTTYK pc2**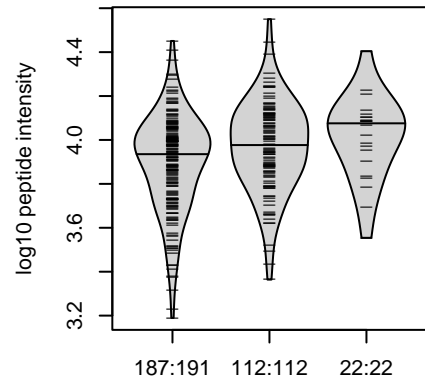

rs9430347  
 $p = 0.00018$ ,  $\beta = 0.329$ ,  $N = 321$

**WTLTAPPGYR pc2**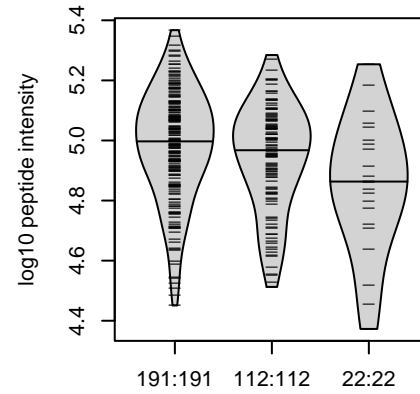

rs9430347  
 $p = 0.00046$ ,  $\beta = -0.307$ ,  $N = 325$

**WPEPVFGR pc2**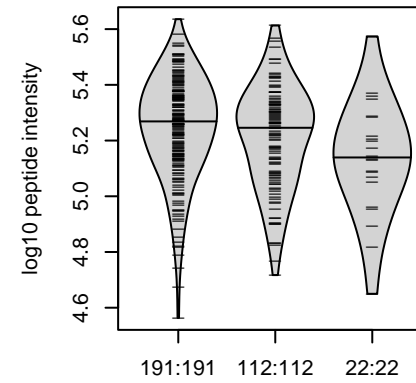

rs9430347  
 $p = 0.0082$ ,  $\beta = -0.232$ ,  $N = 325$

**DTFYSLGSSLDITFR pc2**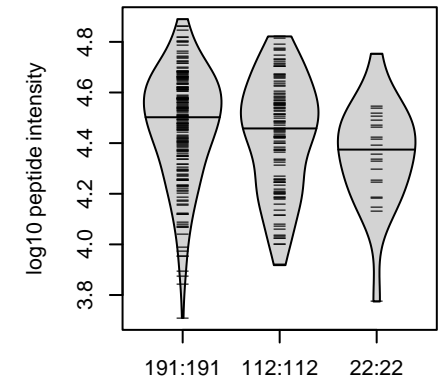

rs9430347  
 $p = 0.014$ ,  $\beta = -0.216$ ,  $N = 325$

Locus: 89 (Sort: 106)  
 Status: Not replicated  
 80% power: No  
 SNP: 1:11104845:T:C  
 rsID: rs9430347  
 UniProtID: O00187  
 HGNC gene: MASP2  
 Type: Cis-pQTL

**CPXM2 [cis]**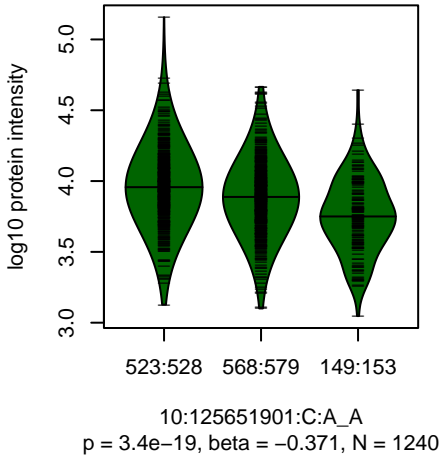**LLNPGEYVVTAK pc2**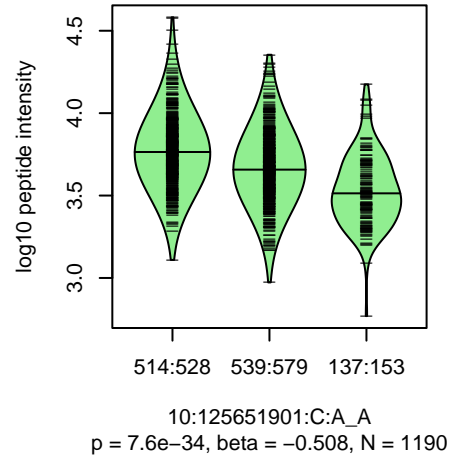**EIPVLNLPVPMVAR pc2**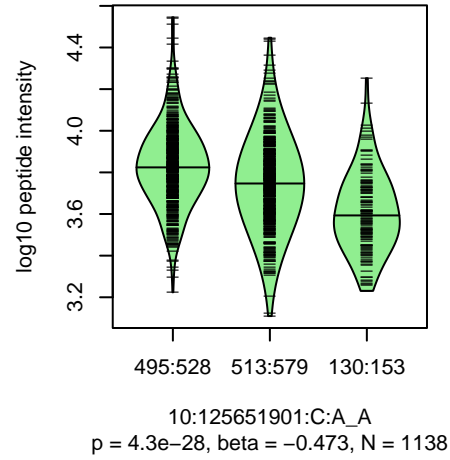**NSLWLSDWVTSYK pc2**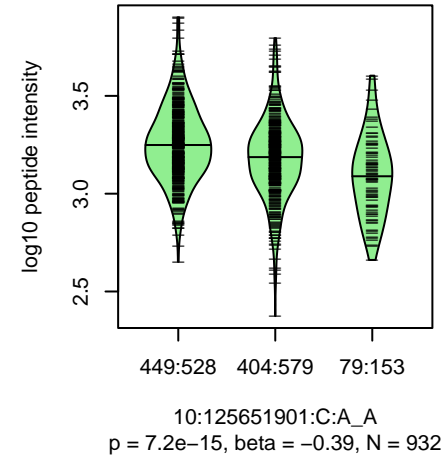**NDLQQWIEVDAR pc2**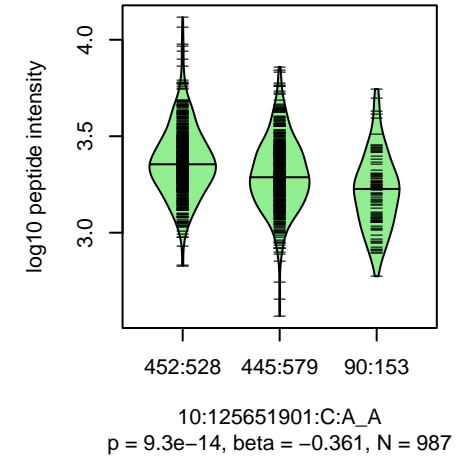**Q8N436 NP5**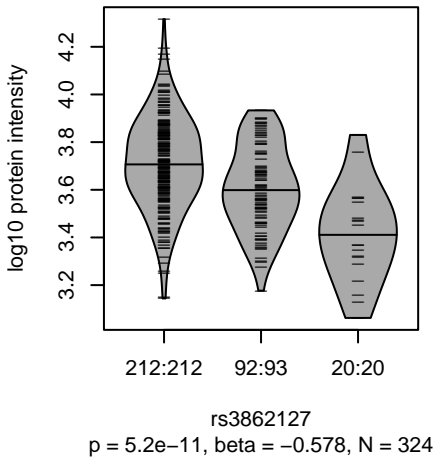**LLNPGEYVVTAK pc2**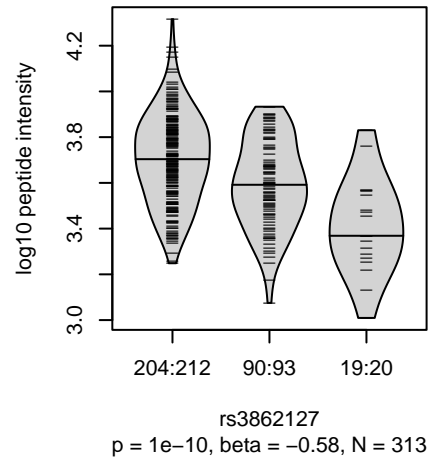**IHVLPSLNPDGYEK pc3**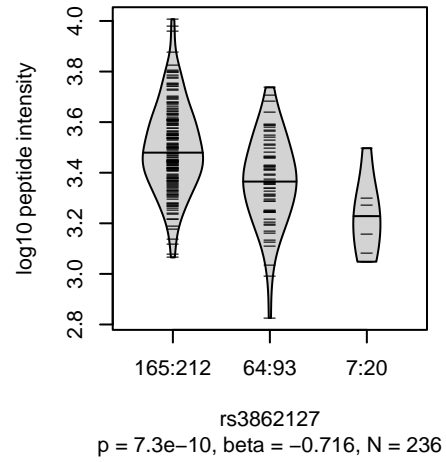**EIPVLNLPVPMVAR pc2**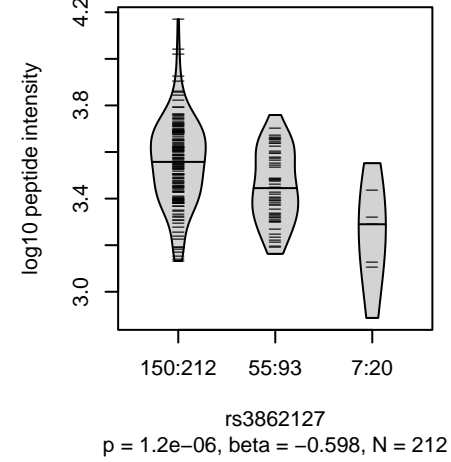**ESCPPLGLETLK pc2**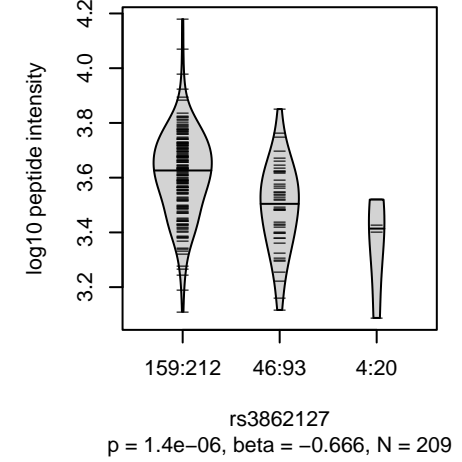

Locus: 90 (Sort: 107)  
 Status: Replicated  
 80% power: Yes  
 SNP: 10:125651901:C:A  
 rsID: rs3862127  
 UniProtID: Q8N436  
 HGNC gene: CPXM2  
 Type: Cis-pQTL

**GALC [cis]**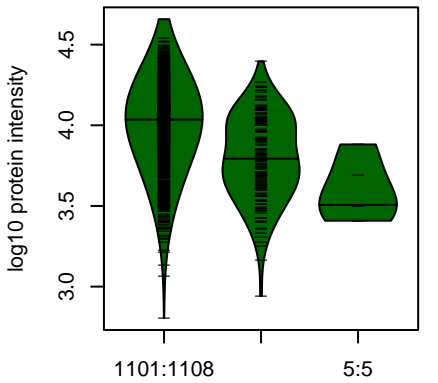

14:88413885:C:A\_A  
 $p = 6.4e-19$ ,  $\beta = -0.72$ ,  $N = 1252$

**SLWTDIPVNFPK pc2**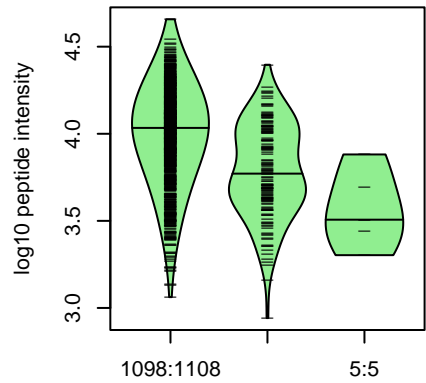

14:88413885:C:A\_A  
 $p = 1e-18$ ,  $\beta = -0.715$ ,  $N = 1249$

**GSFSEIPELQVWYTK pc2**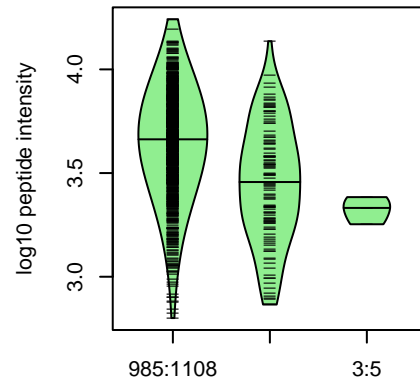

14:88413885:C:A\_A  
 $p = 6.1e-14$ ,  $\beta = -0.692$ ,  $N = 1103$

**GYEWLLMK pc2**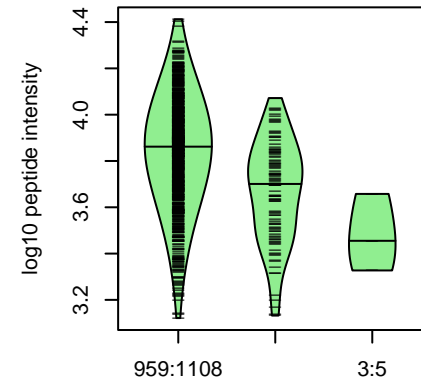

14:88413885:C:A\_A  
 $p = 1.9e-13$ ,  $\beta = -0.709$ ,  $N = 1065$

**VTGDLAGWIIYALGRVEVTAK pc3**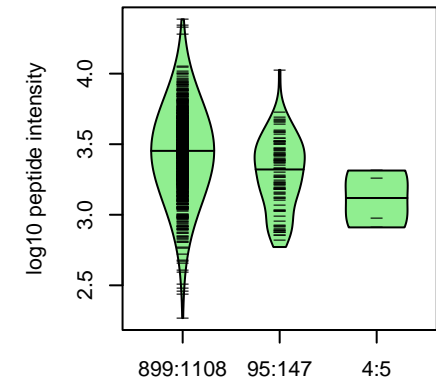

14:88413885:C:A\_A  
 $p = 6.6e-08$ ,  $\beta = -0.533$ ,  $N = 998$

**P54803 NP5**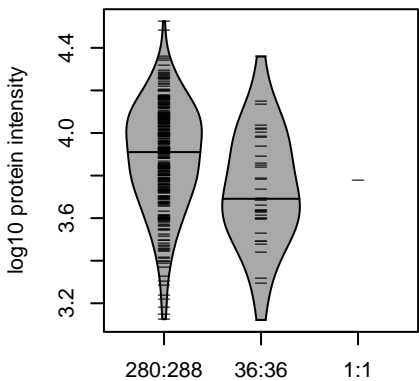

rs17123925  
 $p = 0.0094$ ,  $\beta = -0.433$ ,  $N = 317$

**SLWTDIPVNFPK pc2**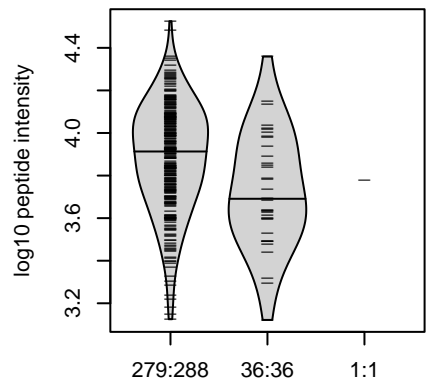

rs17123925  
 $p = 0.0076$ ,  $\beta = -0.441$ ,  $N = 316$

**VTGDLAGWIIYALGRVEVTAK pc3**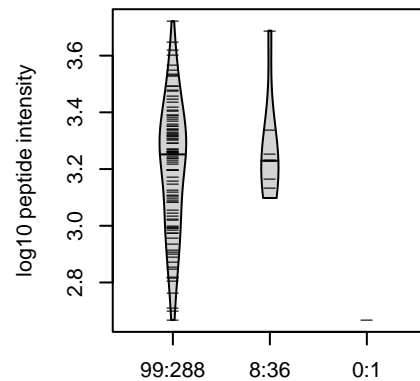

rs17123925  
 $p = 0.21$ ,  $\beta = 0.448$ ,  $N = 107$

**CDVYIETPDTGGVFIAGR pc2**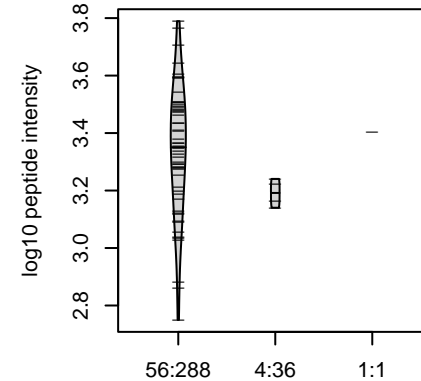

rs17123925  
 $p = 0.35$ ,  $\beta = -0.33$ ,  $N = 61$

**GSFSEIPELQVWYTK pc2**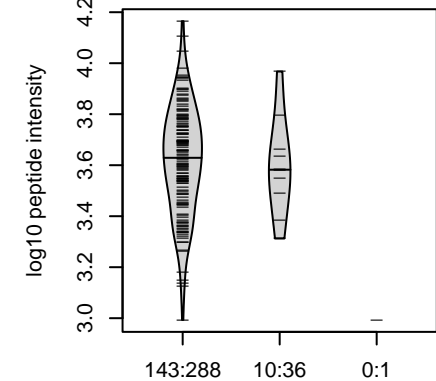

rs17123925  
 $p = 0.53$ ,  $\beta = -0.202$ ,  $N = 153$

**VVDVIGAHYPGTHSAK pc4  
rs34362748 REF**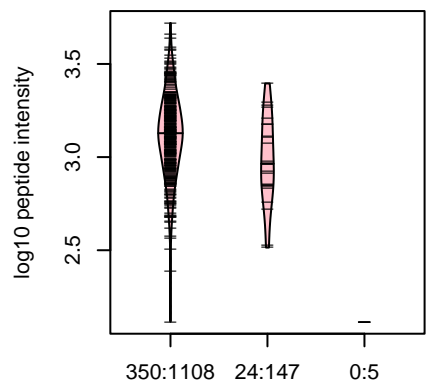

14:88413885:C:A\_A  
 $p = 4e-05$ , model = REC,  $N = 374$

**VVNVIGAHYPGTHSAK pc3  
rs34362748 ALT**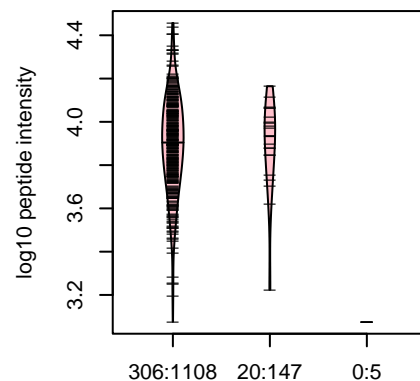

14:88413885:C:A\_A  
 $p = 7e-05$ , model = REC,  $N = 326$

Locus: 91 (Sort: 108)  
 Status: Not replicated  
 80% power: Yes  
 SNP: 14:88413885:C:A  
 rsID: rs17123925  
 UniProtID: P54803  
 HGNC gene: GALC  
 Type: Cis-pQTL

**MST1 [cis]**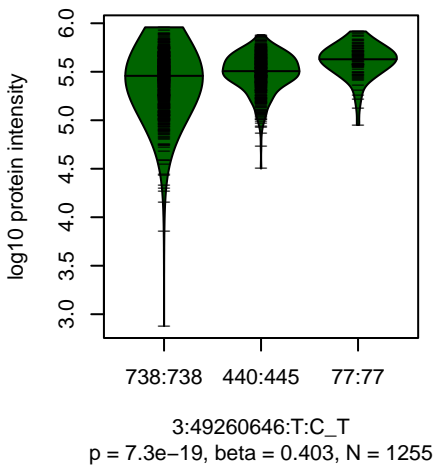**TPFDYCALR pc2**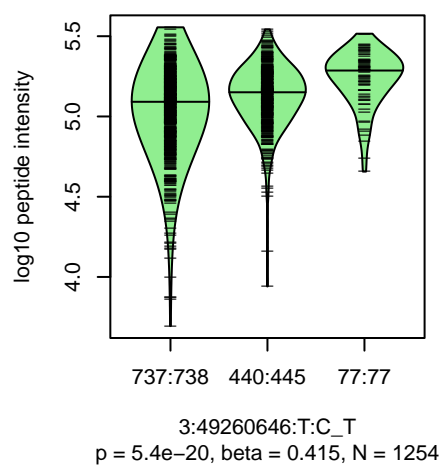**MVCGPSGSQVLVLLK pc2**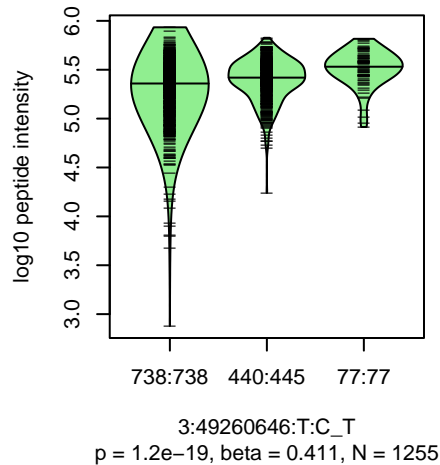**FQSCGIK pc2**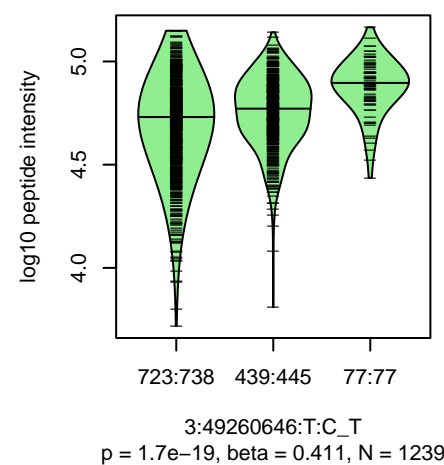**NGLEENFCR pc2**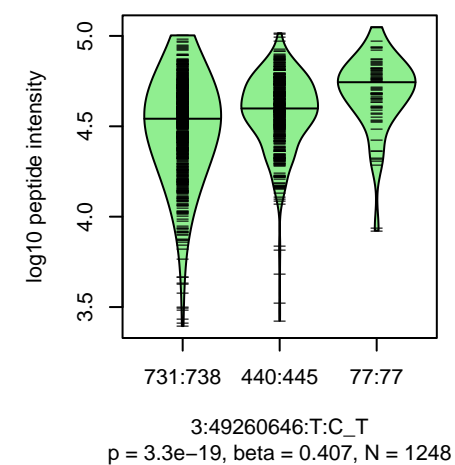**G3XAK1 NP3**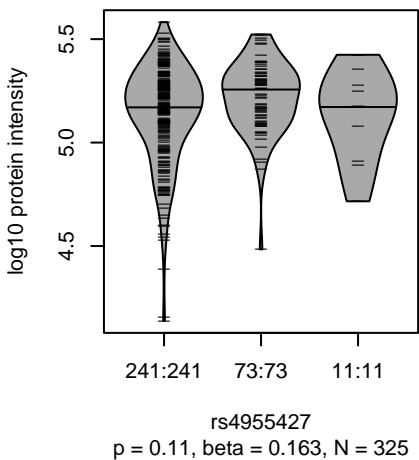**CGPLMDCR pc2**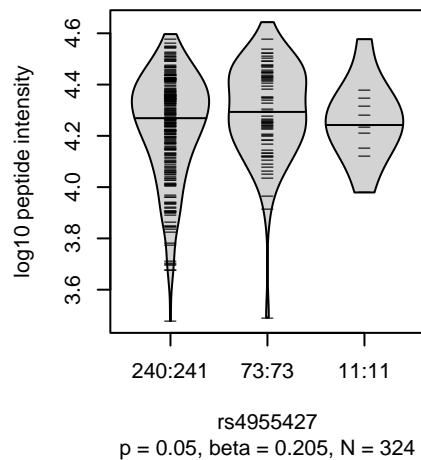**WDAQIPHQHR pc3**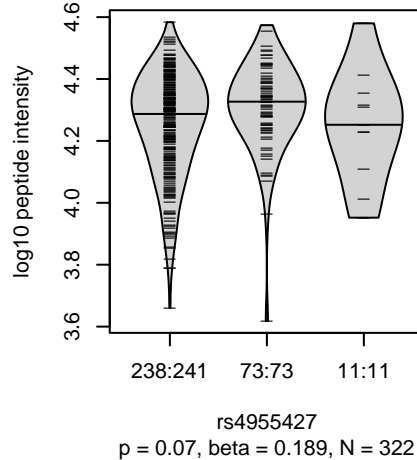**NPDGSEAPWCFTLRPGMR pc3**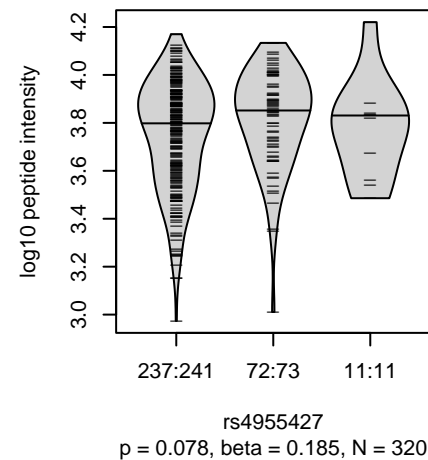**QEATTVSCFR pc2**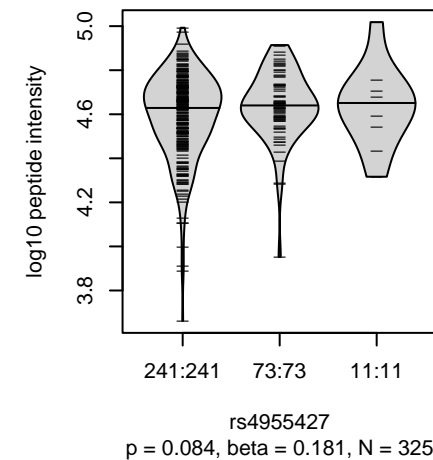**SCWPAVFTR pc2  
rs3197999 ALT**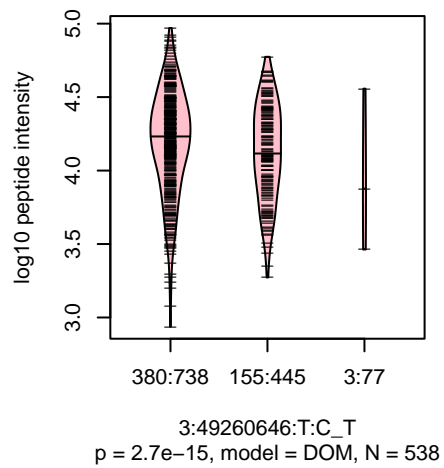**WPAVFTR pc2  
rs3197999 REF**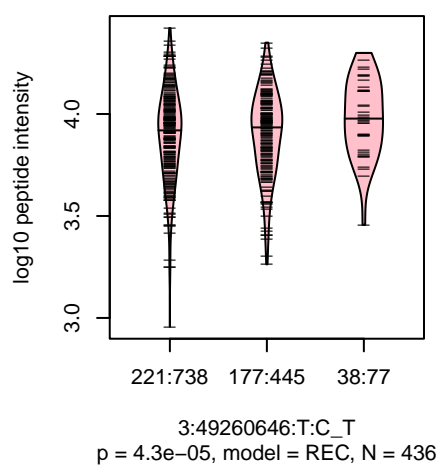

Locus: 92 (Sort: 109)  
Status: Not replicated  
80% power: Yes  
SNP: 3:49260646:T:C  
rsID: rs4955427  
UniProtID: G3XAK1  
HGNC gene: MST1  
Type: Cis-pQTL

**MMP3 [cis]**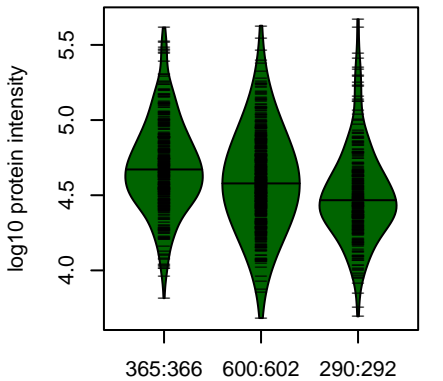

11:102687418:T:C\_C  
 $p = 1.1e-18$ ,  $\beta = -0.339$ ,  $N = 1255$

**IVNYTPDLPK pc2**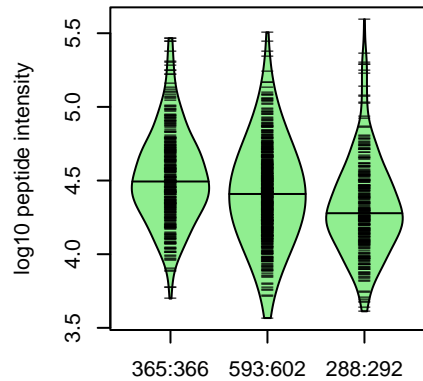

11:102687418:T:C\_C  
 $p = 7.5e-19$ ,  $\beta = -0.341$ ,  $N = 1246$

**VWEEVTLTFSR pc2**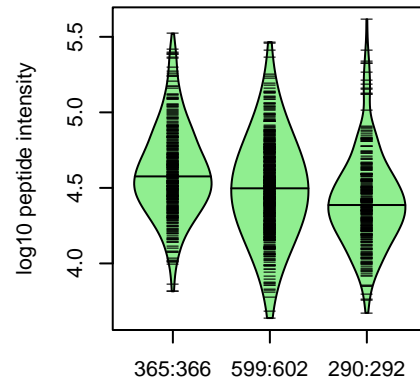

11:102687418:T:C\_C  
 $p = 2.4e-18$ ,  $\beta = -0.336$ ,  $N = 1254$

**LDSDTLEVMR pc2**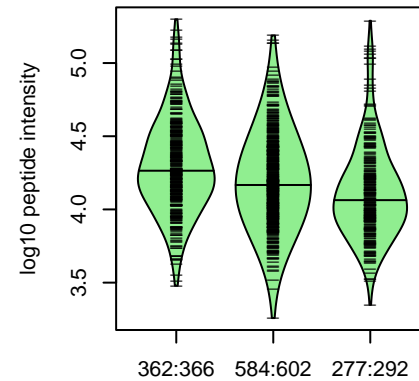

11:102687418:T:C\_C  
 $p = 2e-16$ ,  $\beta = -0.321$ ,  $N = 1223$

**DLVFIFK pc2**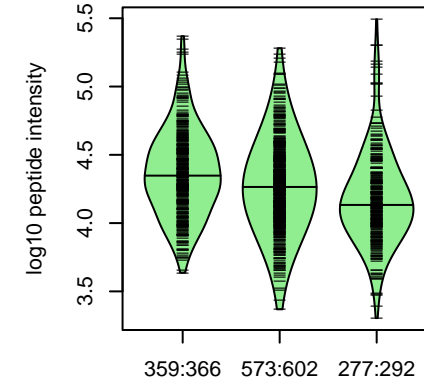

11:102687418:T:C\_C  
 $p = 3.7e-15$ ,  $\beta = -0.308$ ,  $N = 1209$

**P08254 NP5**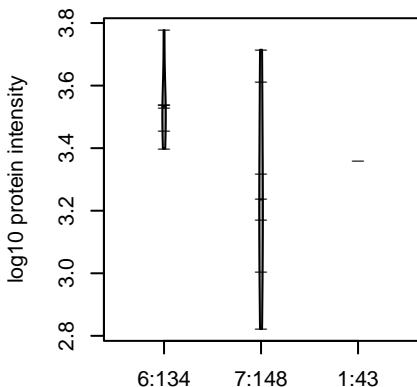

rs10791596  
 $p = 0.15$ ,  $\beta = -0.538$ ,  $N = 14$

**YLENYDLEK pc2  
rs679620 ALT**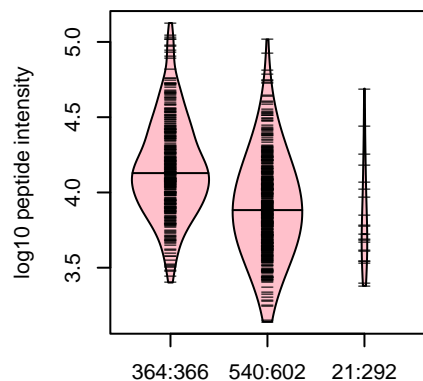

11:102687418:T:C\_C  
 $p = 3.3e-183$ ,  $\text{model} = \text{DOM}$ ,  $N = 925$

**YLENYDLK pc2  
rs679620 REF**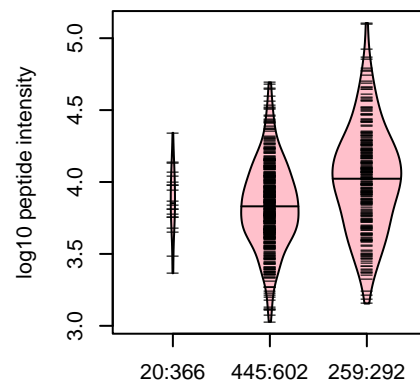

11:102687418:T:C\_C  
 $p = 3e-140$ ,  $\text{model} = \text{REC}$ ,  $N = 724$

**YLENYDLKK pc3  
rs679620 REF**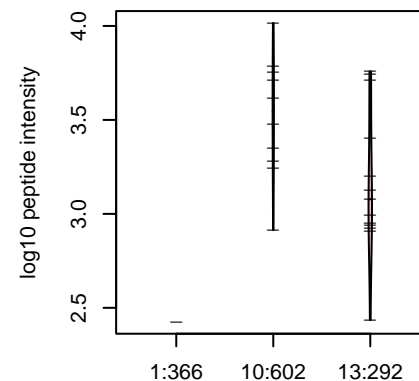

11:102687418:T:C\_C  
 $p = 0.00088$ ,  $\text{model} = \text{DOM}$ ,  $N = 24$

Locus: 93 (Sort: 110)  
 Status: Not replicated  
 80% power: No  
 SNP: 11:102687418:T:C  
 rsID: rs10791596  
 UniProtID: P08254  
 HGNC gene: MMP3  
 Type: Cis-pQTL

**COLEC10 [trans]**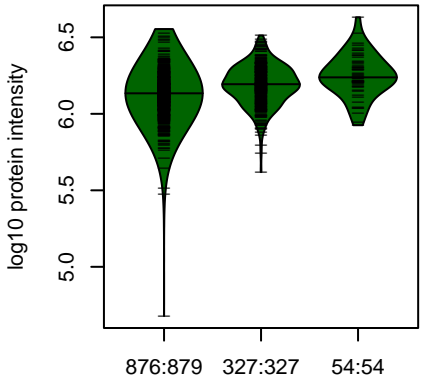

2:3640142:C:T\_C  
 $p = 1.2e-18$ ,  $\beta = 0.437$ ,  $N = 1257$

**FVGQLDISIAR pc2**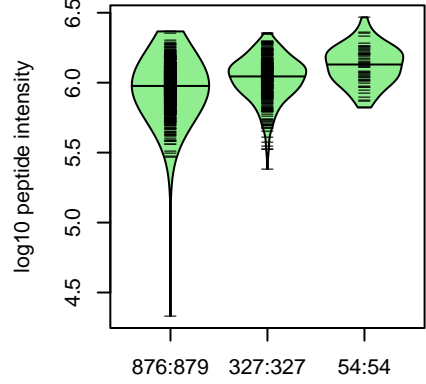

2:3640142:C:T\_C  
 $p = 2.9e-19$ ,  $\beta = 0.444$ ,  $N = 1257$

**AGTVDCGR pc2**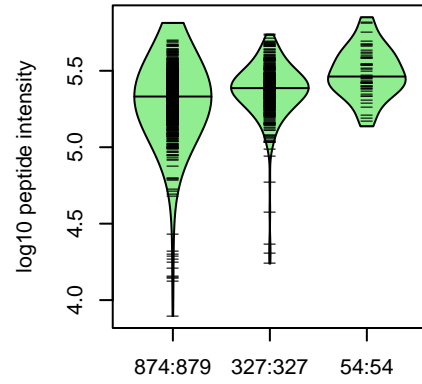

2:3640142:C:T\_C  
 $p = 4.5e-17$ ,  $\beta = 0.417$ ,  $N = 1255$

**VFIGVNDLER pc2**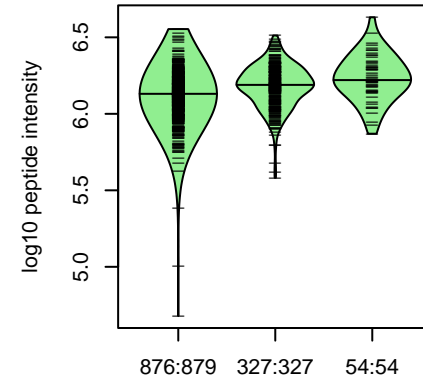

2:3640142:C:T\_C  
 $p = 5.3e-16$ ,  $\beta = 0.402$ ,  $N = 1257$

**DEAANTLIADYVAK pc2**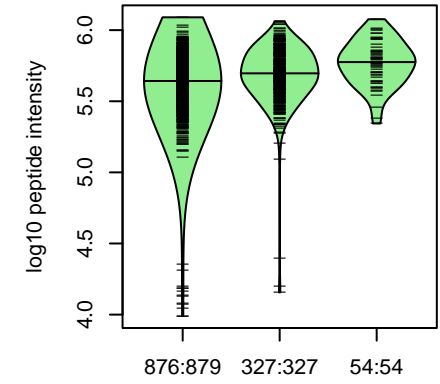

2:3640142:C:T\_C  
 $p = 1.7e-11$ ,  $\beta = 0.335$ ,  $N = 1257$

**Q9Y6Z7 NP5**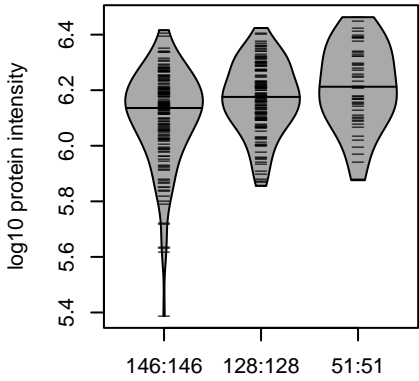

rs6542680  
 $p = 0.0031$ ,  $\beta = 0.223$ ,  $N = 325$

**AGTVDCGR pc2**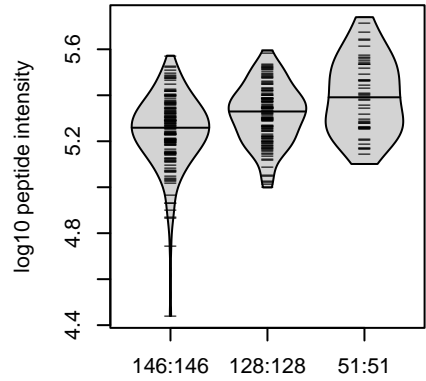

rs6542680  
 $p = 1.1e-05$ ,  $\beta = 0.329$ ,  $N = 325$

**FVGQLDISIAR pc2**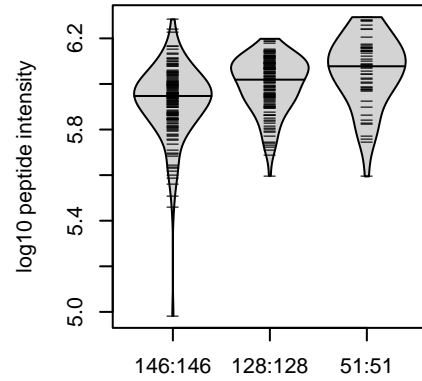

rs6542680  
 $p = 1.4e-05$ ,  $\beta = 0.326$ ,  $N = 325$

**ESLTHCR pc2**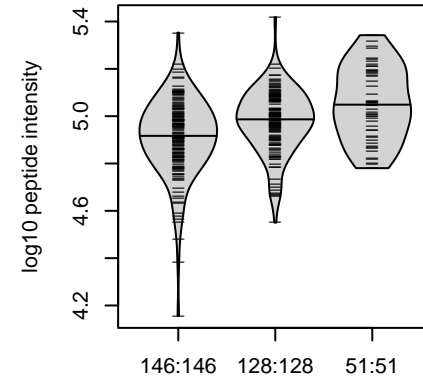

rs6542680  
 $p = 6.2e-05$ ,  $\beta = 0.301$ ,  $N = 325$

**DEAANTLIADYVAK pc2**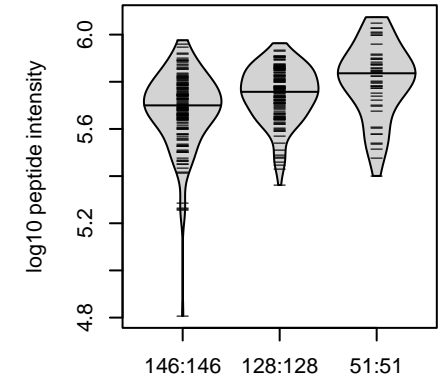

rs6542680  
 $p = 0.00012$ ,  $\beta = 0.289$ ,  $N = 325$

Locus: 94 (Sort: 111)

Status: Not replicated

80% power: No

SNP: 2:3640142:C:T

rsID: rs6542680

UniProtID: Q9Y6Z7

HGNC gene: COLEC10

Type: Trans-pQTL

**COLEC11 [cis]**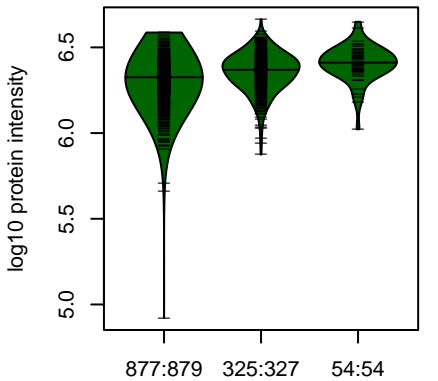

2:3640142:C:T\_C  
 $p = 4.3e-17$ ,  $\beta = 0.417$ ,  $N = 1256$

**YADAQLSCQGR pc2**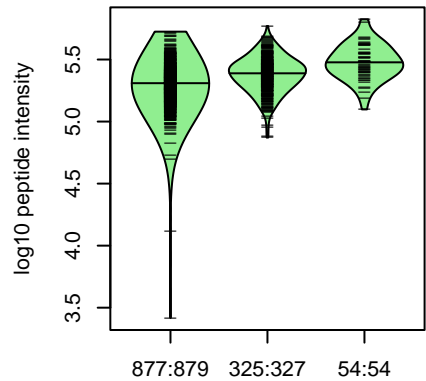

2:3640142:C:T\_C  
 $p = 1.5e-25$ ,  $\beta = 0.515$ ,  $N = 1256$

**DEAANGLMAAYLAQAGLAR pc3**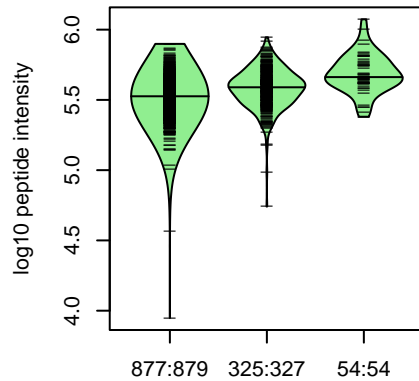

2:3640142:C:T\_C  
 $p = 1.3e-23$ ,  $\beta = 0.494$ ,  $N = 1256$

**VFIGINDLEK pc2**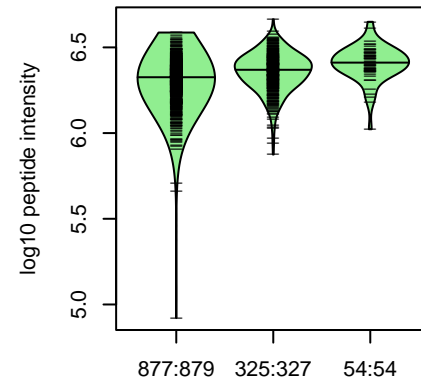

2:3640142:C:T\_C  
 $p = 4.3e-17$ ,  $\beta = 0.417$ ,  $N = 1256$

**GTLSMPKDEAANGLMAAYLAQAGLA**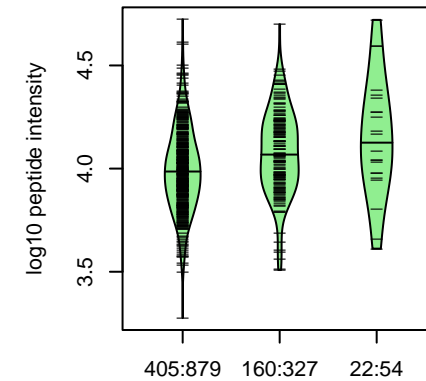

2:3640142:C:T\_C  
 $p = 9.5e-07$ ,  $\beta = 0.362$ ,  $N = 587$

**Q9BWP8 NP2**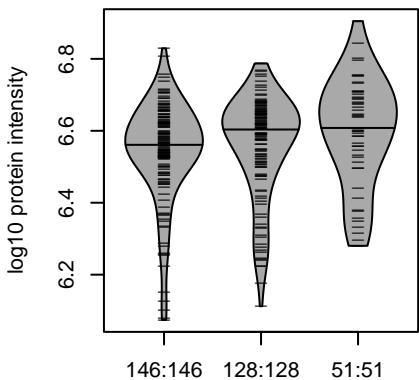

rs6542680  
 $p = 0.011$ ,  $\beta = 0.191$ ,  $N = 325$

**AIGEMDNQVSQLTSELK pc2**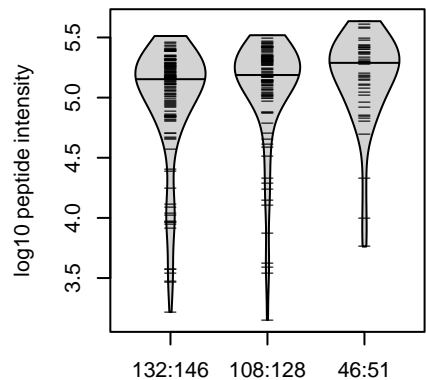

rs6542680  
 $p = 5e-04$ ,  $\beta = 0.276$ ,  $N = 286$

**GTLSMPKDEAANGLMAAYLAQAGLAI**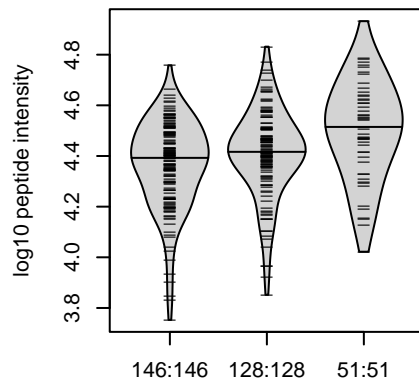

rs6542680  
 $p = 0.0013$ ,  $\beta = 0.243$ ,  $N = 325$

**YADAQLSCQGR pc2**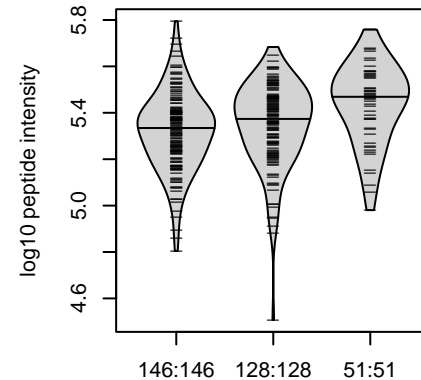

rs6542680  
 $p = 0.0019$ ,  $\beta = 0.234$ ,  $N = 325$

**DEAANGLMAAYLAQAGLAR pc2**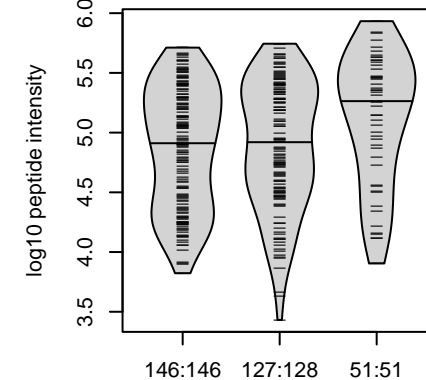

rs6542680  
 $p = 0.0051$ ,  $\beta = 0.212$ ,  $N = 324$

Locus: 94 (Sort: 112)  
 Status: Not replicated  
 80% power: No  
 SNP: 2:3640142:C:T  
 rsID: rs6542680  
 UniProtID: Q9BWP8  
 HGNC gene: COLEC11  
 Type: Cis-pQTL

**EGAFVYSDHSPMR pc2  
rs7567833 REF**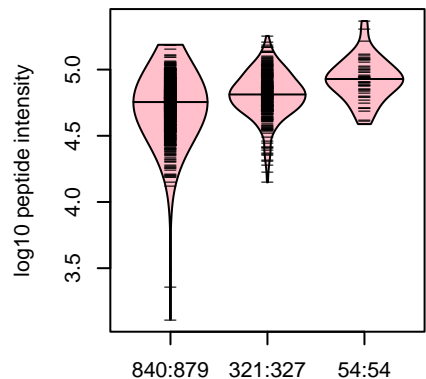

2:3640142:C:T\_C  
 $p = 0.012$ , model = REC,  $N = 1215$

**EGAFVYSDR pc2  
rs7567833 ALT**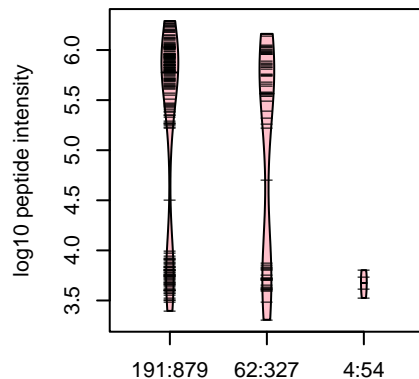

2:3640142:C:T\_C  
 $p = 0.015$ , model = DOM,  $N = 257$

**ANGPTL6 [trans]**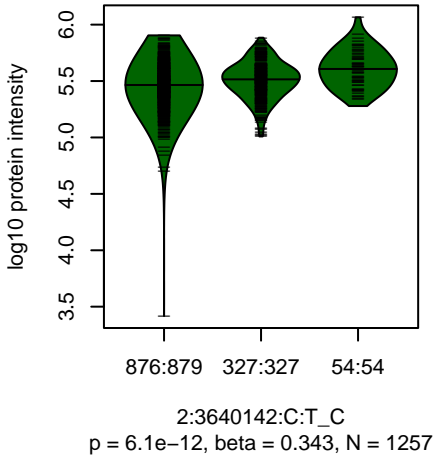**QDGSVNFFTTWQHYK pc3**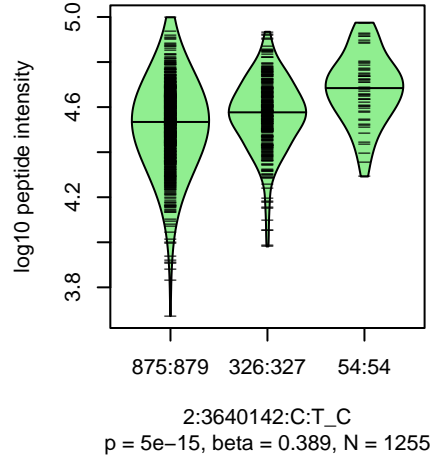**QAGHEQSGVYELR pc3**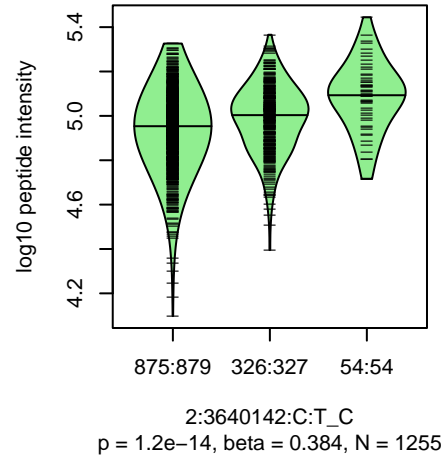**ATPEAANASELAALR pc2**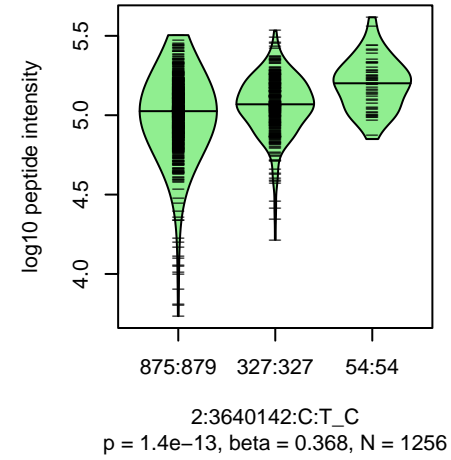**FTGAVCWSGPASTR pc2**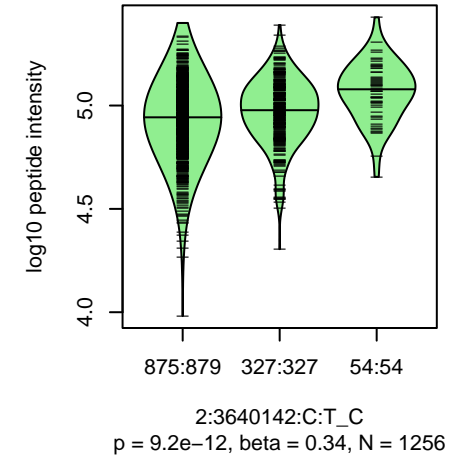**Q8NI99 NP5**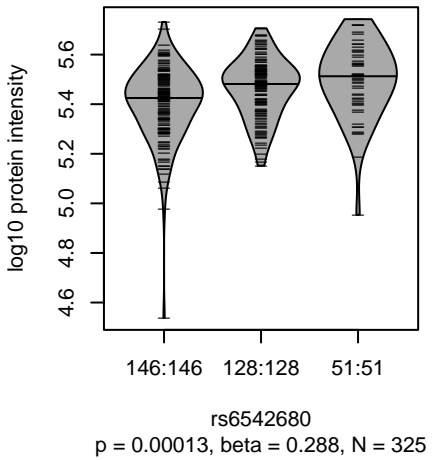**QAGHEQSGVYELR pc3**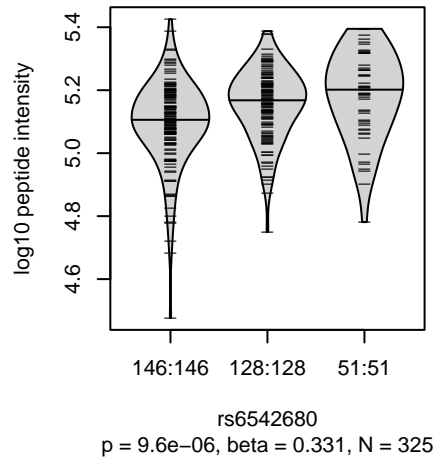**LGQYHGDAGDSLWHNDK pc4**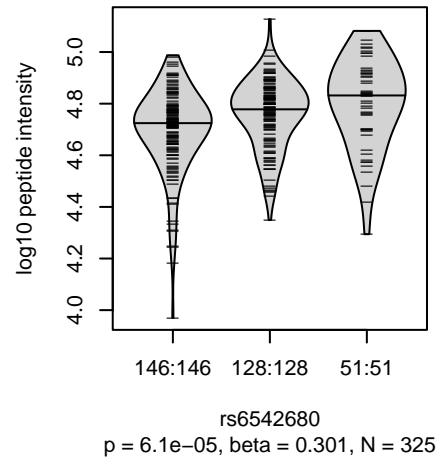**ATPEAANASELAALR pc2**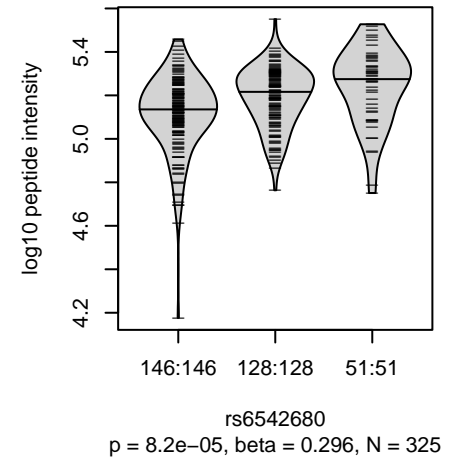**MLDPAPEPQRDQTR pc3**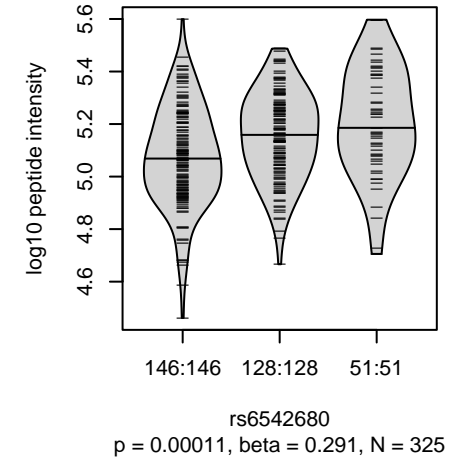

Locus: 94 (Sort: 113)

Status: Replicated

80% power: No

SNP: 2:3640142:C:T

rsID: rs6542680

UniProtID: Q8NI99

HGNC gene: ANGPTL6

Type: Trans-pQTL



**CFHR4 [cis]**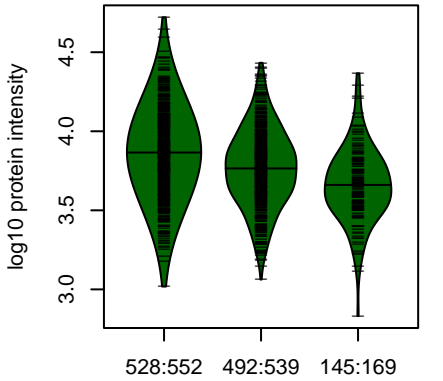

1:196821817:G:A\_G  
 $p = 1.2e-18$ ,  $\beta = -0.369$ ,  $N = 1165$

**FCDMPVFENSR pc2**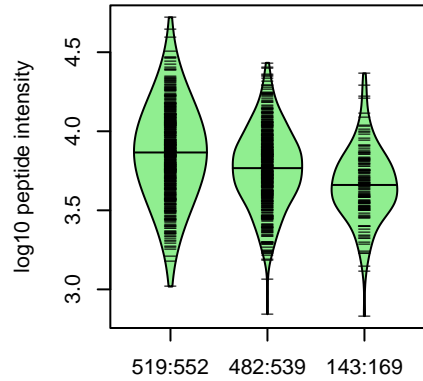

1:196821817:G:A\_G  
 $p = 9.5e-19$ ,  $\beta = -0.373$ ,  $N = 1144$

**TGDTIEFMCK pc2**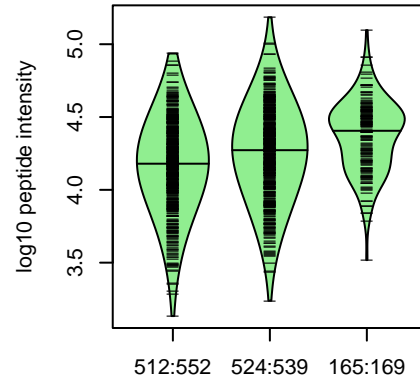

1:196821817:G:A\_G  
 $p = 7e-15$ ,  $\beta = 0.319$ ,  $N = 1201$

**VYVPQSR pc2**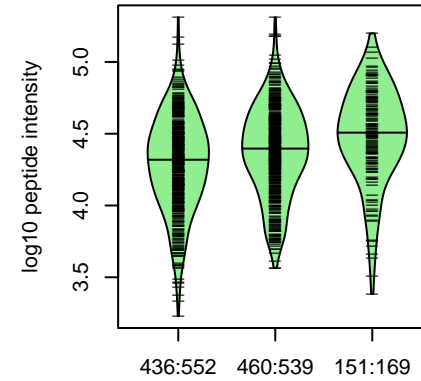

1:196821817:G:A\_G  
 $p = 2.3e-10$ ,  $\beta = 0.277$ ,  $N = 1047$

**CIHPCIITEENMNK pc3**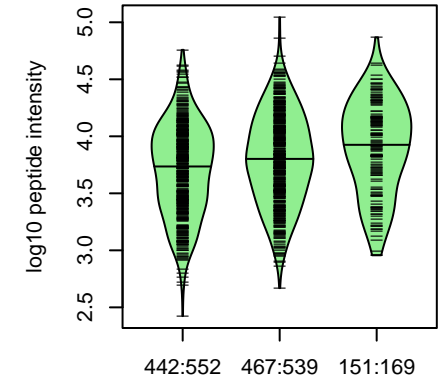

1:196821817:G:A\_G  
 $p = 1.3e-07$ ,  $\beta = 0.231$ ,  $N = 1060$

**Q92496 NP5**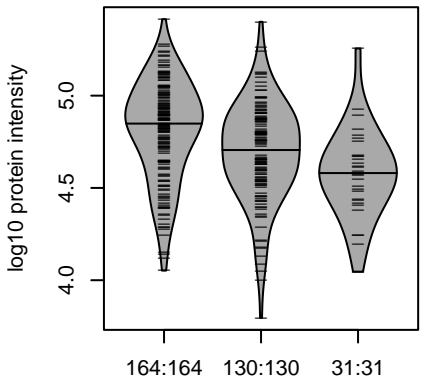

rs12142766  
 $p = 1.3e-05$ ,  $\beta = -0.356$ ,  $N = 325$

**FCDMPVFENSR pc2**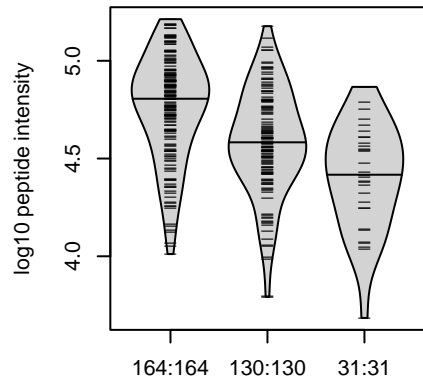

rs12142766  
 $p = 2.9e-09$ ,  $\beta = -0.482$ ,  $N = 325$

**PCEFPEIQHGHLYYENTR pc4**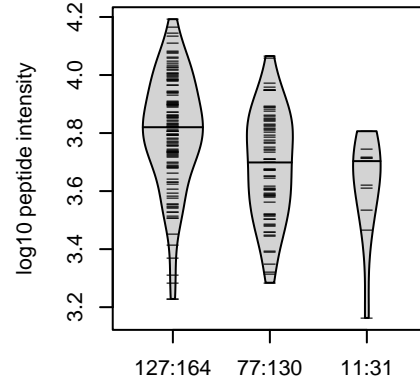

rs12142766  
 $p = 2.6e-05$ ,  $\beta = -0.467$ ,  $N = 215$

**YVTCSNGDWSEPPR pc2**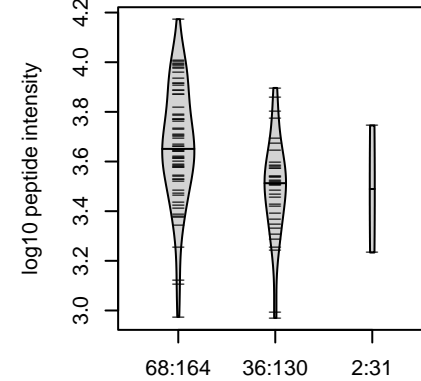

rs12142766  
 $p = 0.00017$ ,  $\beta = -0.658$ ,  $N = 106$

**VEYQCQSYELQGSK pc2**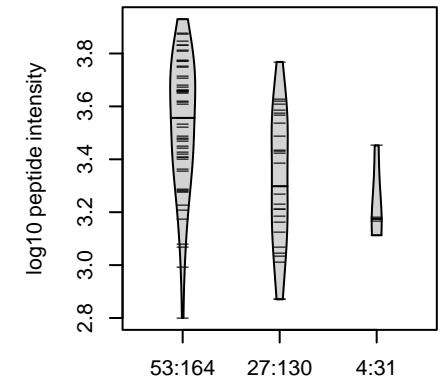

rs12142766  
 $p = 0.00018$ ,  $\beta = -0.654$ ,  $N = 84$

Locus: 95 (Sort: 114)  
 Status: Replicated  
 80% power: Yes  
 SNP: 1:196821817:G:A  
 rsID: rs12142766  
 UniProtID: Q92496  
 HGNC gene: CFHR4  
 Type: Cis-pQTL

**PLA2G2A [cis]**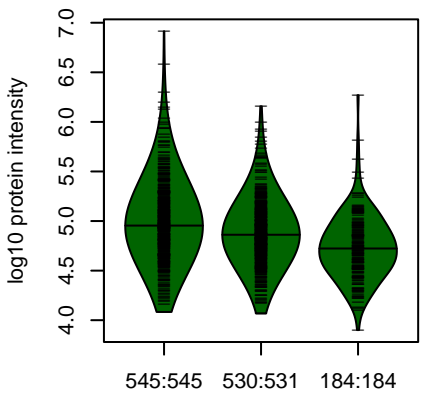

1:20301781:A:C\_C  
 $p = 1.6e-18$ ,  $\beta = -0.344$ ,  $N = 1259$

**SQLCECDK pc2**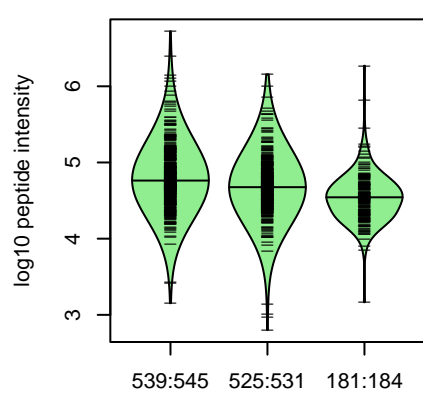

1:20301781:A:C\_C  
 $p = 1.3e-21$ ,  $\beta = -0.376$ ,  $N = 1245$

**CCVTHDCCYK pc3**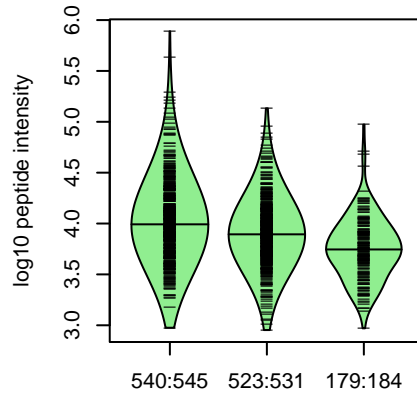

1:20301781:A:C\_C  
 $p = 2.6e-20$ ,  $\beta = -0.365$ ,  $N = 1242$

**YQYYSNK pc2**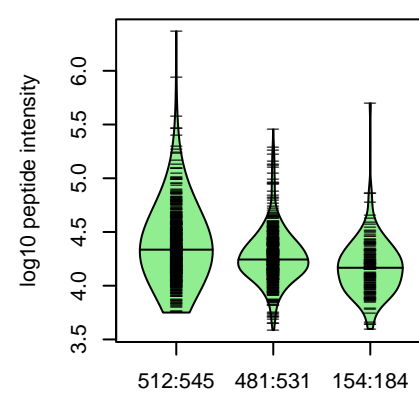

1:20301781:A:C\_C  
 $p = 2.5e-16$ ,  $\beta = -0.342$ ,  $N = 1147$

**AAATCFAR pc2**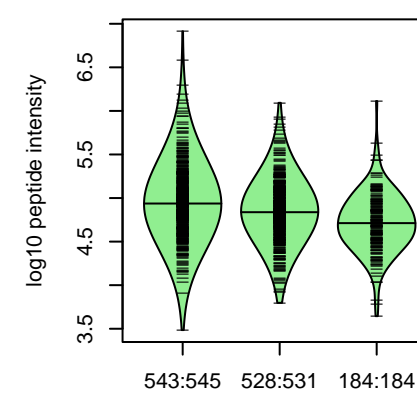

1:20301781:A:C\_C  
 $p = 1.1e-15$ ,  $\beta = -0.316$ ,  $N = 1255$

**P14555 NP4**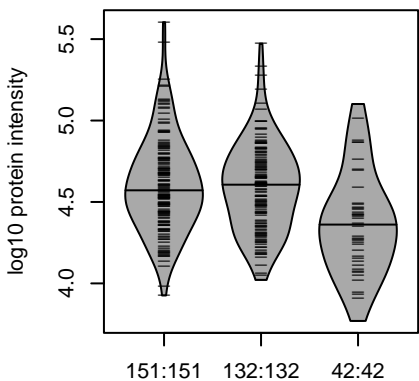

rs3767221  
 $p = 0.00043$ ,  $\beta = -0.273$ ,  $N = 325$

**SQLCECDK pc2**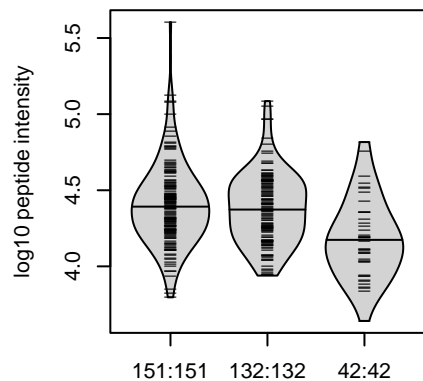

rs3767221  
 $p = 0.00019$ ,  $\beta = -0.292$ ,  $N = 325$

**EAALSYGFYGCHCGVGGR pc3**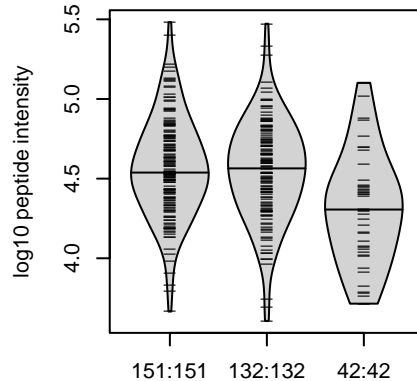

rs3767221  
 $p = 0.00059$ ,  $\beta = -0.269$ ,  $N = 325$

**CCVTHDCCYK pc3**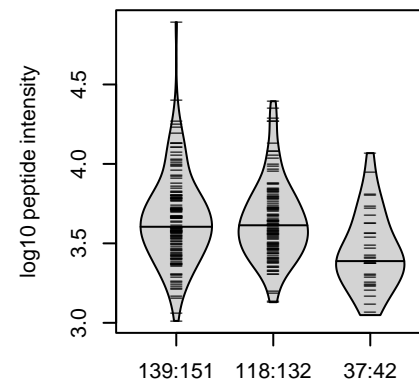

rs3767221  
 $p = 0.00071$ ,  $\beta = -0.279$ ,  $N = 294$

**AAATCFAR pc2**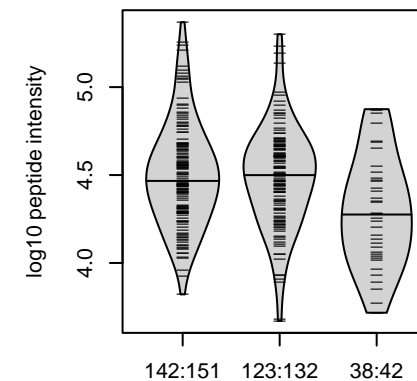

rs3767221  
 $p = 0.0036$ ,  $\beta = -0.238$ ,  $N = 303$

Locus: 96 (Sort: 115)  
 Status: Not replicated  
 80% power: No  
 SNP: 1:20301781:A:C  
 rsID: rs3767221  
 UniProtID: P14555  
 HGNC gene: PLA2G2A  
 Type: Cis-pQTL

**ADAMDEC1 [cis]**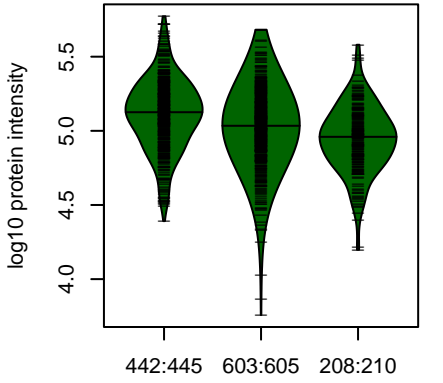

8:24240670:T:C\_C  
 $p = 2.9e-18$ ,  $\beta = -0.347$ ,  $N = 1253$

**VVPSASTTFDNFLR pc2**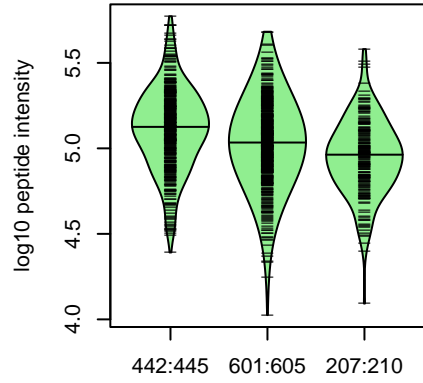

8:24240670:T:C\_C  
 $p = 1.3e-17$ ,  $\beta = -0.341$ ,  $N = 1250$

**WHSSNLGK pc2**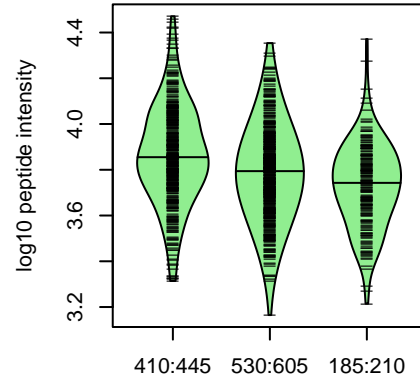

8:24240670:T:C\_C  
 $p = 2.4e-15$ ,  $\beta = -0.331$ ,  $N = 1125$

**YIDLVLVDNAFYK pc2**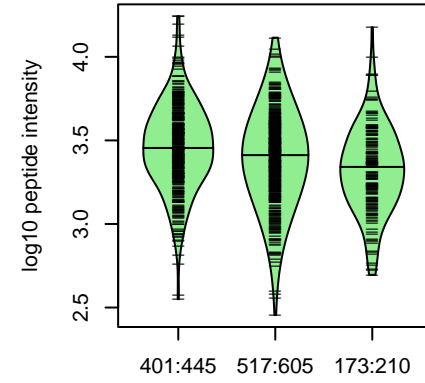

8:24240670:T:C\_C  
 $p = 4.3e-10$ ,  $\beta = -0.269$ ,  $N = 1091$

**LKPGTDCGGDAPNHTTE pc3**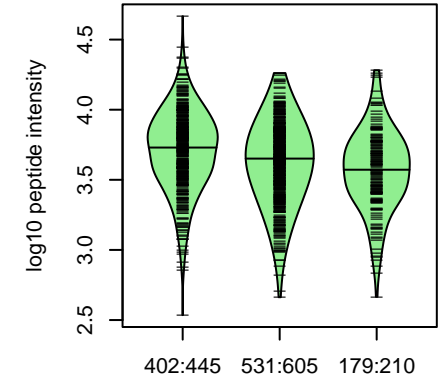

8:24240670:T:C\_C  
 $p = 7.3e-10$ ,  $\beta = -0.263$ ,  $N = 1112$

**O15204 NP3**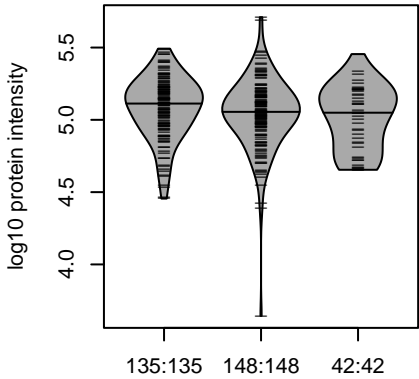

rs9650408  
 $p = 0.14$ ,  $\beta = -0.119$ ,  $N = 325$

**WHSSNLGK pc2**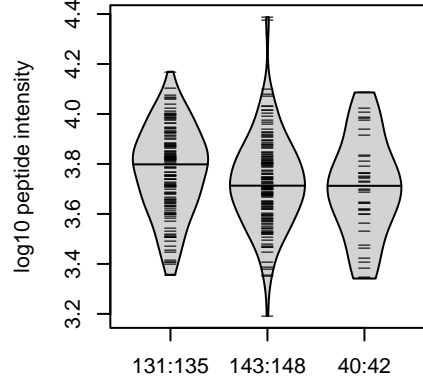

rs9650408  
 $p = 0.035$ ,  $\beta = -0.173$ ,  $N = 314$

**IHDHAQLLSGISFNRR pc4**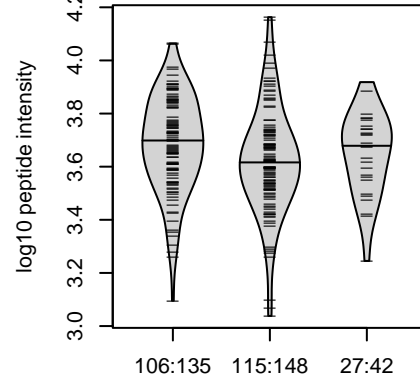

rs9650408  
 $p = 0.083$ ,  $\beta = -0.164$ ,  $N = 248$

**YIDLVLVDNAFYK pc3**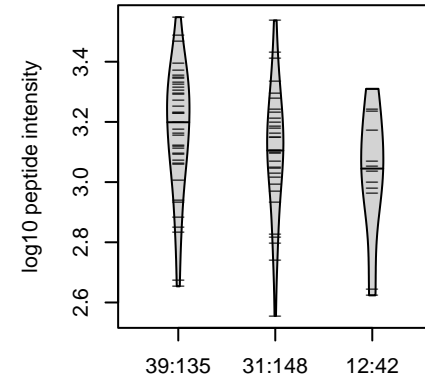

rs9650408  
 $p = 0.13$ ,  $\beta = -0.226$ ,  $N = 82$

**NSVASISTCDGLR pc2**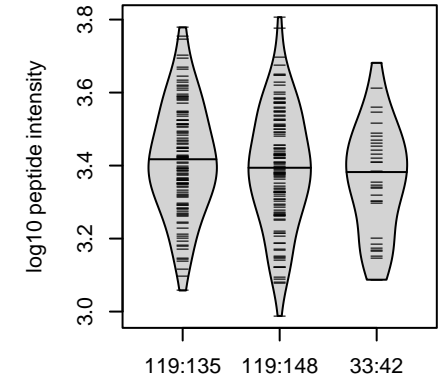

rs9650408  
 $p = 0.22$ ,  $\beta = -0.109$ ,  $N = 271$

Locus: 97 (Sort: 116)  
 Status: Not replicated  
 80% power: No  
 SNP: 8:24240670:T:C  
 rsID: rs9650408  
 UniProtID: O15204  
 HGNC gene: ADAMDEC1  
 Type: Cis-pQTL

**ECTSLCCEALTCK pc2  
rs3765124 ALT**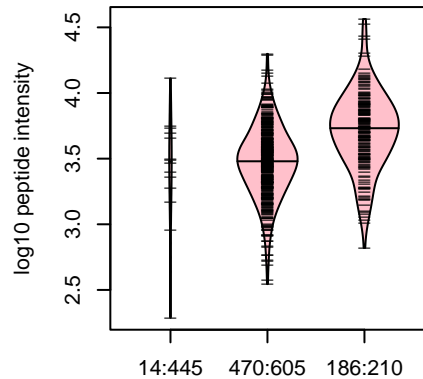

8:24240670:T:C\_C  
 $p = 5.4e-178$ ,  $\text{model} = \text{REC}$ ,  $N = 670$

**ECTNLCCEALTCK pc2  
rs3765124 REF**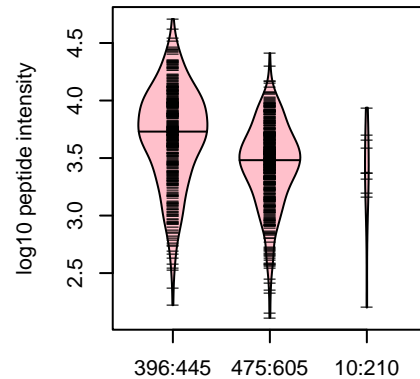

8:24240670:T:C\_C  
 $p = 2e-110$ ,  $\text{model} = \text{DOM}$ ,  $N = 881$

**BPIFB1 [cis]**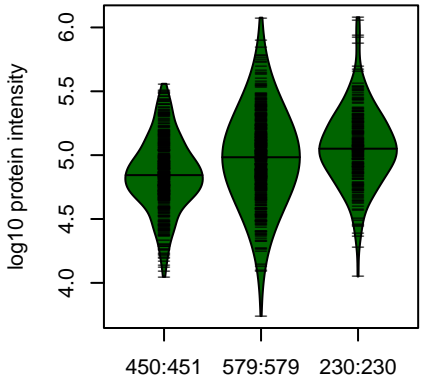

20:31688868:G:C\_G  
 $p = 3.3e-18$ ,  $\beta = 0.337$ ,  $N = 1259$

**ILTQDTPEFFIDQGHAK pc3**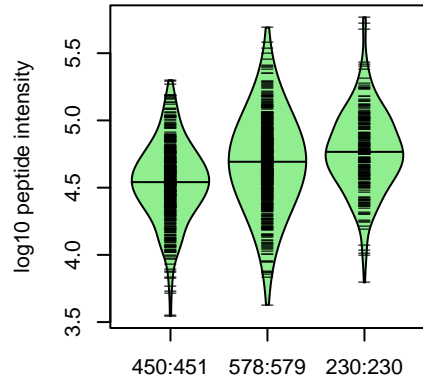

20:31688868:G:C\_G  
 $p = 1.7e-19$ ,  $\beta = 0.349$ ,  $N = 1258$

**LGSTQIVK pc2**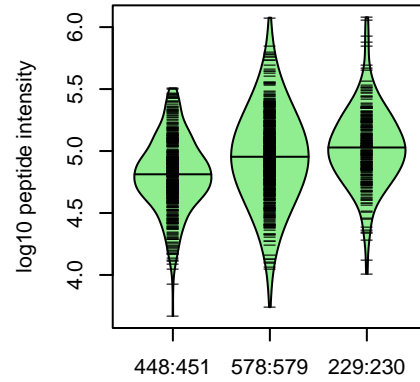

20:31688868:G:C\_G  
 $p = 4.4e-18$ ,  $\beta = 0.337$ ,  $N = 1255$

**ALGFEEAESSLTk pc2**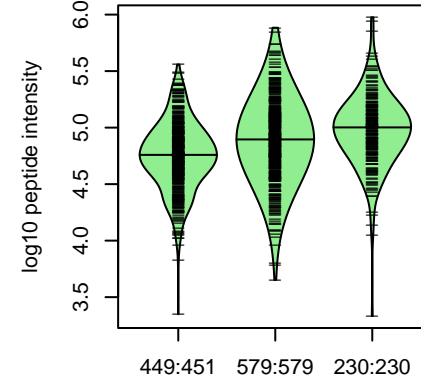

20:31688868:G:C\_G  
 $p = 6.8e-18$ ,  $\beta = 0.334$ ,  $N = 1258$

**MDTSASGPTR pc2**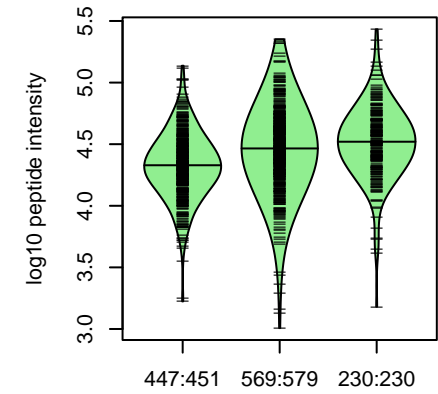

20:31688868:G:C\_G  
 $p = 6e-16$ ,  $\beta = 0.315$ ,  $N = 1246$

**Q8TDL5 NP4**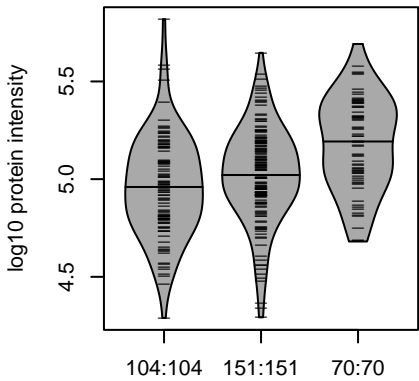

rs761931  
 $p = 1.6e-06$ ,  $\beta = 0.355$ ,  $N = 325$

**MDTSASGPTR pc2**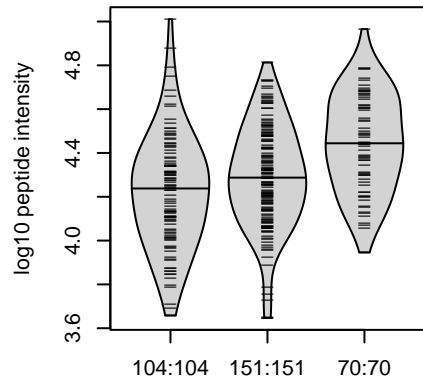

rs761931  
 $p = 8.1e-07$ ,  $\beta = 0.367$ ,  $N = 325$

**ALGFEEAESSLTk pc2**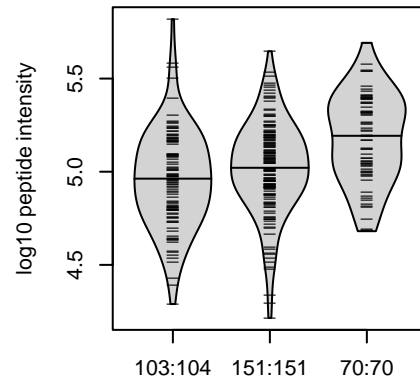

rs761931  
 $p = 2.4e-06$ ,  $\beta = 0.352$ ,  $N = 324$

**ILTQDTPEFFIDQGHAK pc3**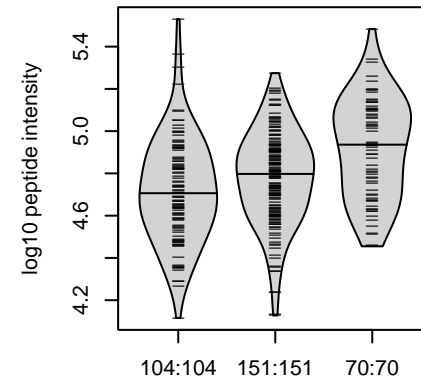

rs761931  
 $p = 3.8e-06$ ,  $\beta = 0.344$ ,  $N = 325$

**QVMNLLVPSLPNLVK pc2**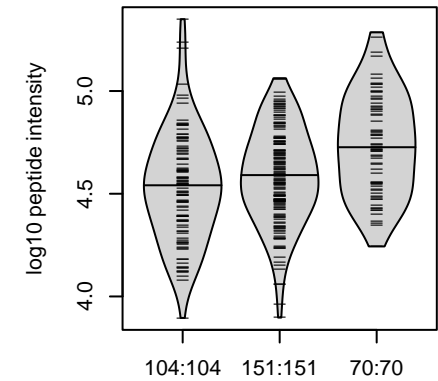

rs761931  
 $p = 6.6e-06$ ,  $\beta = 0.336$ ,  $N = 325$

Locus: 98 (Sort: 117)  
 Status: Replicated  
 80% power: Yes  
 SNP: 20:31688868:G:C  
 rsID: rs761931  
 UniProtID: Q8TDL5  
 HGNC gene: BPIFB1  
 Type: Cis-pQTL

**APMAP [cis]**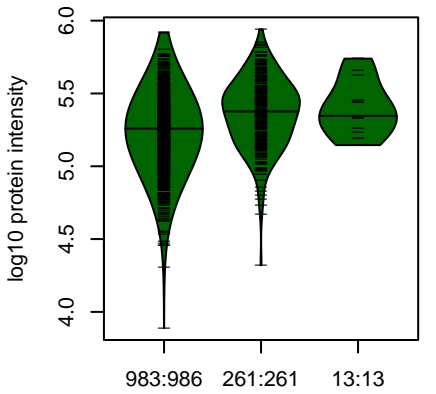

20:24949944:G:C\_C  
 $p = 4.2e-18$ ,  $\beta = 0.541$ ,  $N = 1257$

**LLLSSETPIEGK pc2**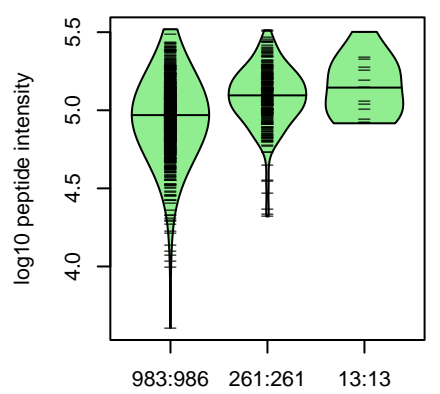

20:24949944:G:C\_C  
 $p = 2.6e-24$ ,  $\beta = 0.631$ ,  $N = 1257$

**EPPLLLGVLHPNTK pc3**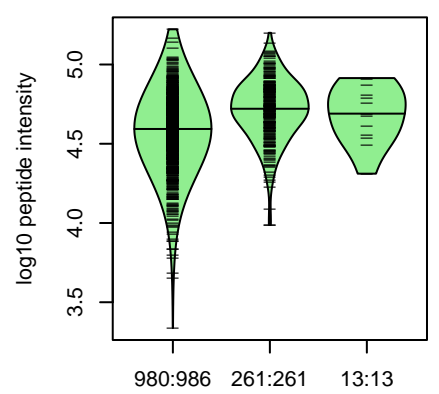

20:24949944:G:C\_C  
 $p = 1.2e-21$ ,  $\beta = 0.594$ ,  $N = 1254$

**YSLVLELSDSGAFR pc2**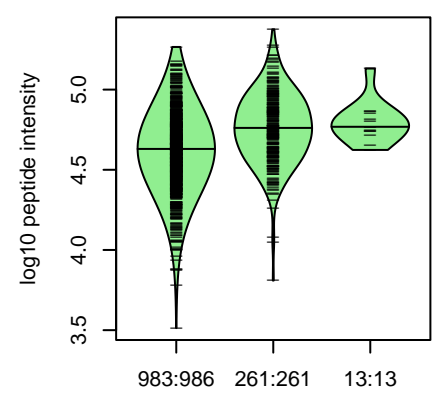

20:24949944:G:C\_C  
 $p = 4.1e-21$ ,  $\beta = 0.587$ ,  $N = 1257$

**LENGEIETIAR pc2**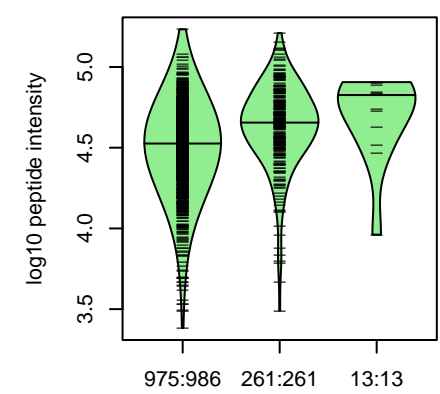

20:24949944:G:C\_C  
 $p = 1.7e-18$ ,  $\beta = 0.548$ ,  $N = 1249$

**Q9HDC9 NP5**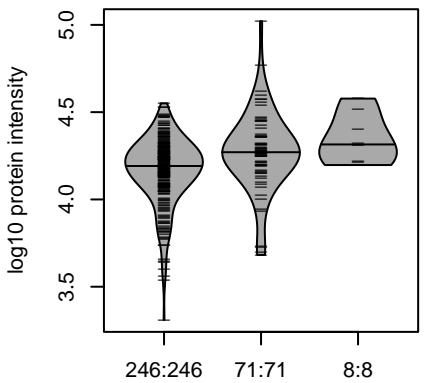

rs6138438  
 $p = 9.1e-05$ ,  $\beta = 0.428$ ,  $N = 325$

**LLLSSETPIEGK pc2**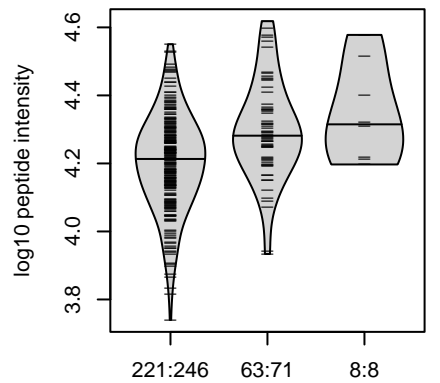

rs6138438  
 $p = 3.2e-06$ ,  $\beta = 0.526$ ,  $N = 292$

**EPPLLLGVLHPNTK pc3**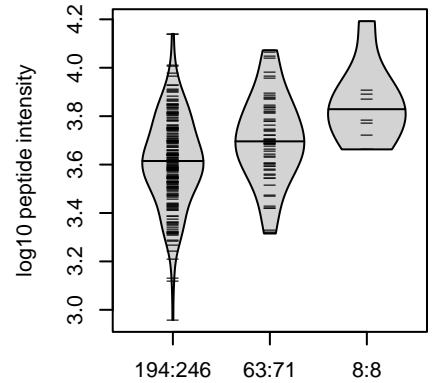

rs6138438  
 $p = 0.00031$ ,  $\beta = 0.416$ ,  $N = 265$

**LFSQETVMK pc2**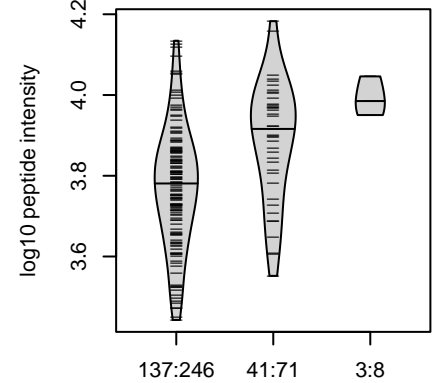

rs6138438  
 $p = 0.00034$ ,  $\beta = 0.541$ ,  $N = 181$

**YSLVLELSDSGAFR pc2**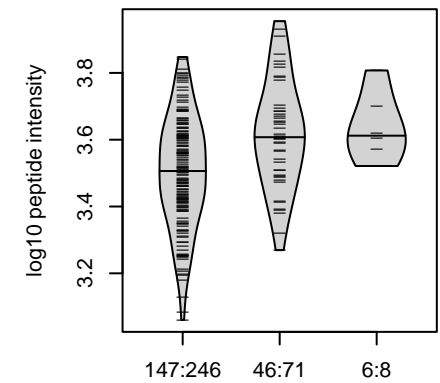

rs6138438  
 $p = 0.00044$ ,  $\beta = 0.467$ ,  $N = 199$

Locus: 99 (Sort: 118)  
 Status: Replicated  
 80% power: No  
 SNP: 20:24949944:G:C  
 rsID: rs6138438  
 UniProtID: Q9HDC9  
 HGNC gene: APMAP  
 Type: Cis-pQTL

**C19orf33 [cis]**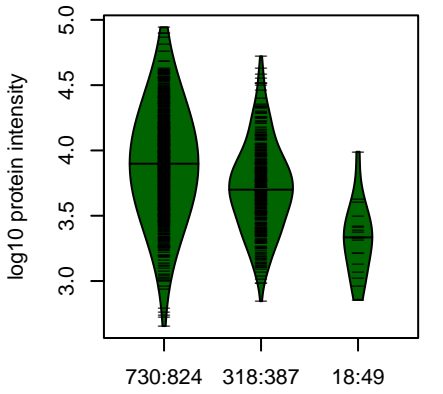

19:38795250:G:A\_A  
 $p = 6.7e-18$ ,  $\beta = -0.511$ ,  $N = 1066$

**SEAGAGPGK pc2**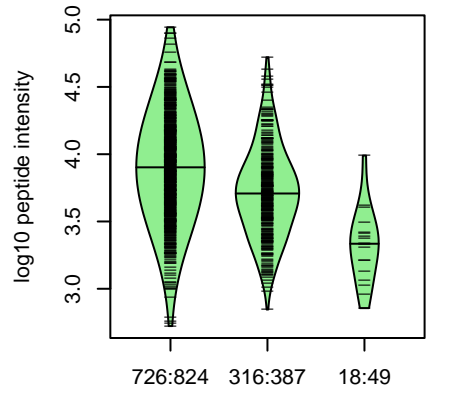

19:38795250:G:A\_A  
 $p = 1.4e-18$ ,  $\beta = -0.522$ ,  $N = 1060$

**QHESIPGK pc2**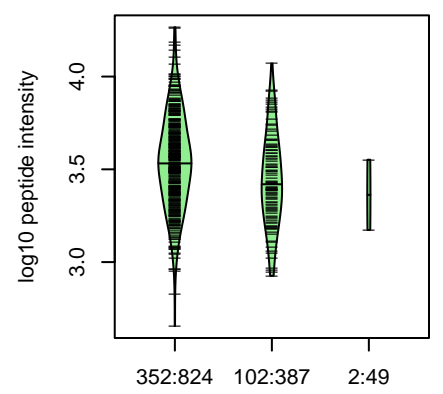

19:38795250:G:A\_A  
 $p = 0.00029$ ,  $\beta = -0.386$ ,  $N = 456$

**PGVGAGHGGDPK pc2**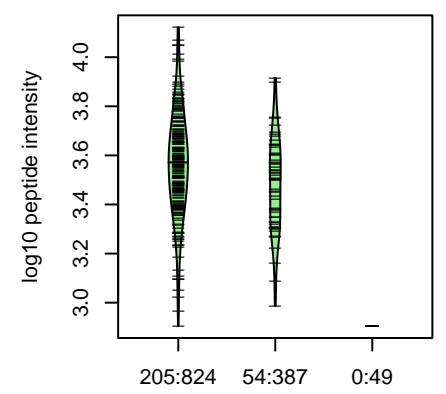

19:38795250:G:A\_A  
 $p = 0.0079$ ,  $\beta = -0.398$ ,  $N = 259$

**Q9GZP8 NP2**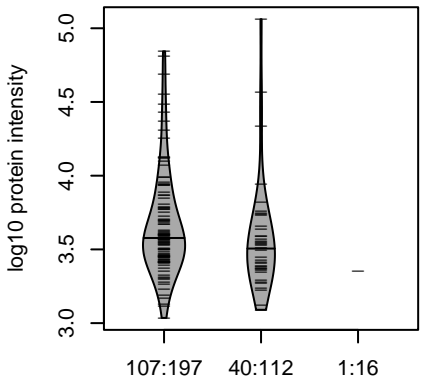

rs45437199  
 $p = 0.014$ ,  $\beta = -0.426$ ,  $N = 148$

**QHESIPGK pc2**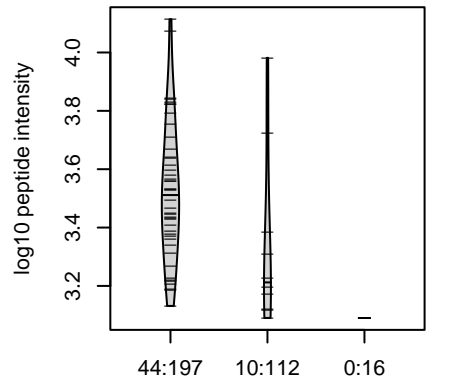

rs45437199  
 $p = 0.012$ ,  $\beta = -0.823$ ,  $N = 54$

**SEAGAGPGK pc2**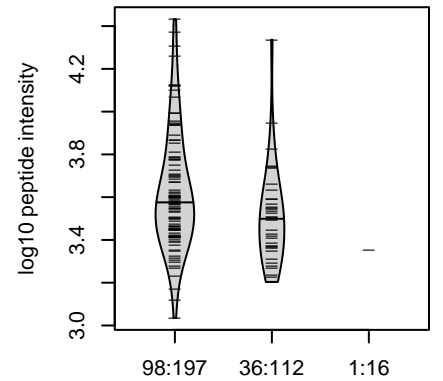

rs45437199  
 $p = 0.013$ ,  $\beta = -0.445$ ,  $N = 135$

Locus: 100 (Sort: 119)  
 Status: Not replicated  
 80% power: No  
 SNP: 19:38795250:G:A  
 rsID: rs45437199  
 UniProtID: Q9GZP8  
 HGNC gene: C19orf33  
 Type: Cis-pQTL

**ITGA2 [cis]**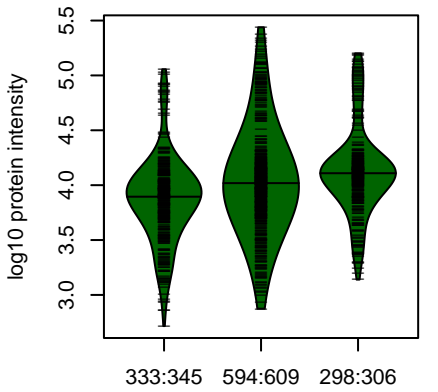

5:52371370:C:T\_T  
 $p = 7.6e-18$ ,  $\beta = 0.336$ ,  $N = 1225$

**VTTGSVPVSMATVIIIHIPQYTK pc3**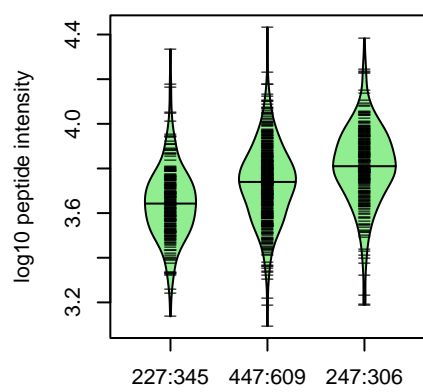

5:52371370:C:T\_T  
 $p = 1.4e-26$ ,  $\beta = 0.473$ ,  $N = 921$

**SVACDVGYPAALK pc2**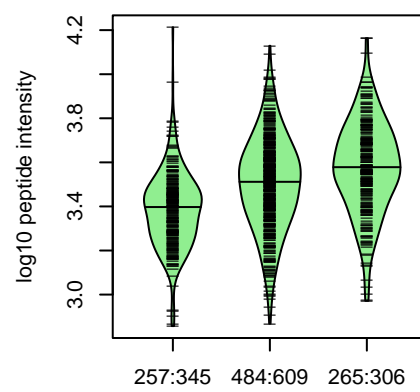

5:52371370:C:T\_T  
 $p = 5.1e-26$ ,  $\beta = 0.447$ ,  $N = 1006$

**VYLFTIK pc2**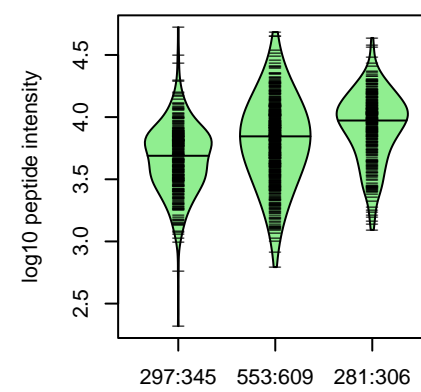

5:52371370:C:T\_T  
 $p = 5.5e-25$ ,  $\beta = 0.418$ ,  $N = 1131$

**AGDISCNADINPLK pc2**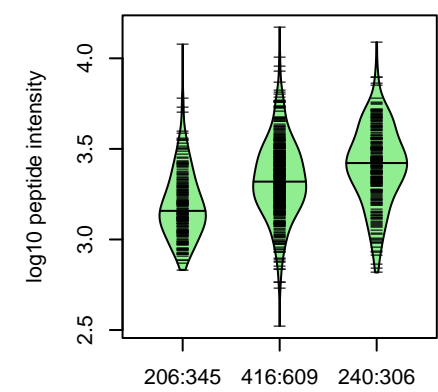

5:52371370:C:T\_T  
 $p = 3.8e-24$ ,  $\beta = 0.464$ ,  $N = 862$

**P17301 NP4**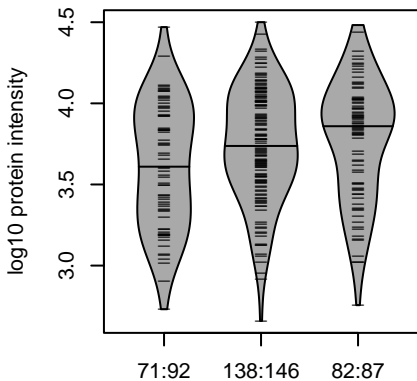

rs12518279  
 $p = 0.026$ ,  $\beta = 0.179$ ,  $N = 291$

**TQVGLIQYANNPR pc2**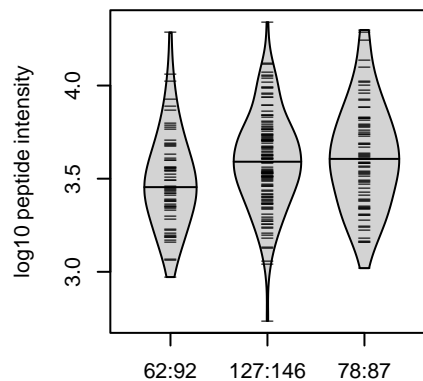

rs12518279  
 $p = 0.016$ ,  $\beta = 0.201$ ,  $N = 267$

**AGDISCNADINPLK pc2**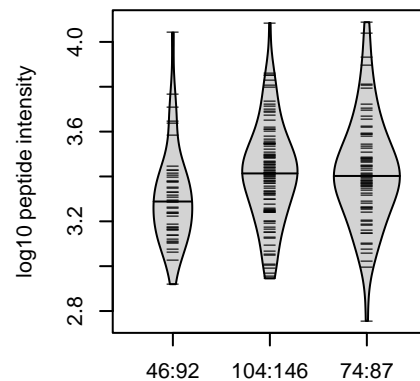

rs12518279  
 $p = 0.016$ ,  $\beta = 0.218$ ,  $N = 224$

**IPLLYDAEIHLTR pc3**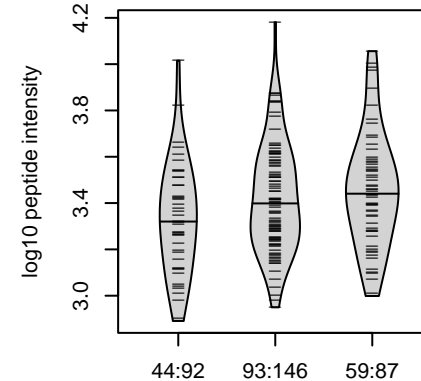

rs12518279  
 $p = 0.02$ ,  $\beta = 0.225$ ,  $N = 196$

**IGQTSSSVSFK pc2**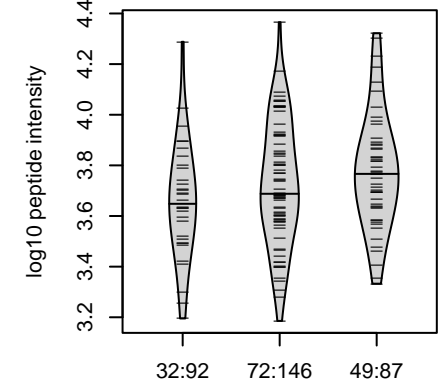

rs12518279  
 $p = 0.03$ ,  $\beta = 0.237$ ,  $N = 153$

**GILGQHFLGPEGIENR pc3  
rs1801106 ALT**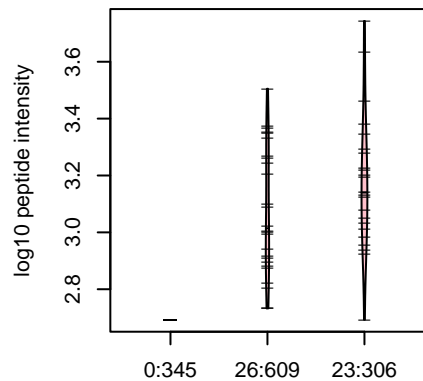

5:52371370:C:T\_T  
 $p = 2e-07$ ,  $\text{model} = \text{REC}$ ,  $N = 49$

**EGILGQHFLGPEGIENR pc3  
rs1801106 REF**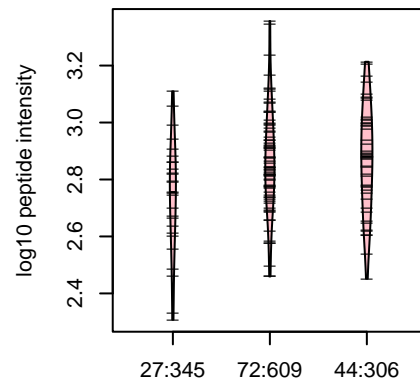

5:52371370:C:T\_T  
 $p = 0.017$ ,  $\text{model} = \text{REC}$ ,  $N = 143$

Locus: 101 (Sort: 120)  
 Status: Not replicated  
 80% power: No  
 SNP: 5:52371370:C:T  
 rsID: rs12518279  
 UniProtID: P17301  
 HGNC gene: ITGA2  
 Type: Cis-pQTL

**HLA-B [cis]**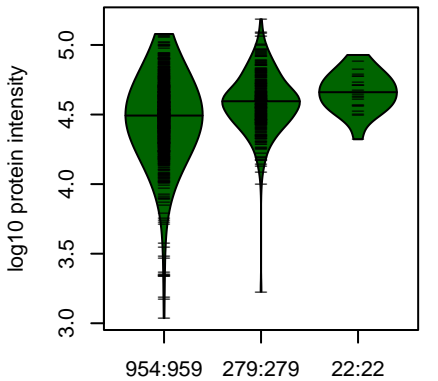

6:32138545:A:C\_A  
 $p = 7.6e-18$ ,  $\beta = 0.501$ ,  $N = 1255$

**SWTAADTAAQITQR pc2**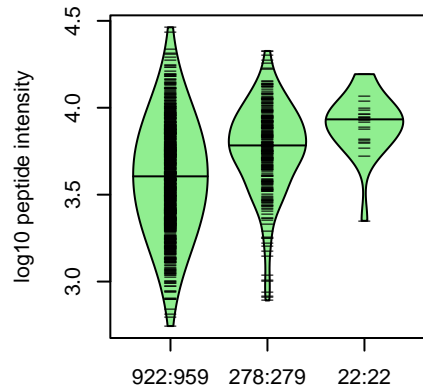

6:32138545:A:C\_A  
 $p = 9.7e-22$ ,  $\beta = 0.558$ ,  $N = 1222$

**FSDAASPR pc2**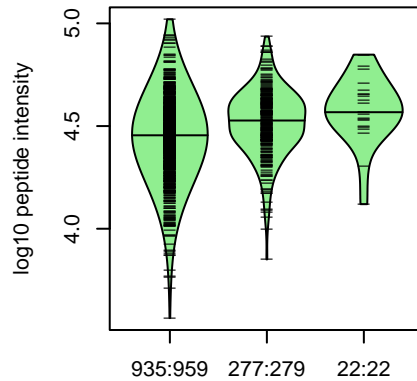

6:32138545:A:C\_A  
 $p = 5.7e-17$ ,  $\beta = 0.49$ ,  $N = 1234$

**DYIALNEDLR pc2**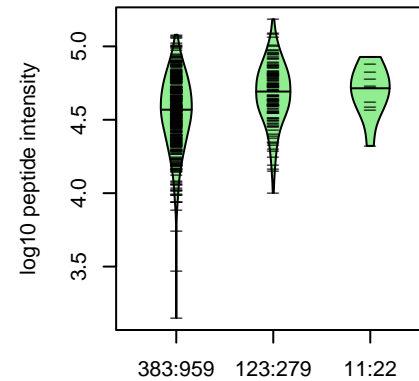

6:32138545:A:C\_A  
 $p = 9.4e-09$ ,  $\beta = 0.499$ ,  $N = 517$

**DGEDQTQDTELVETRPAGDR pc3**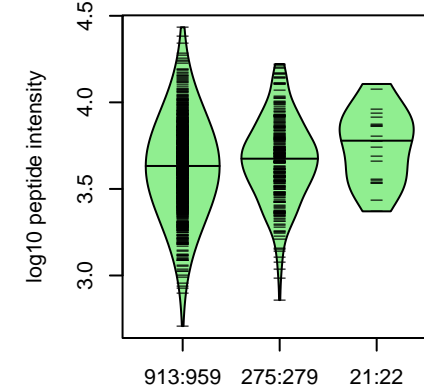

6:32138545:A:C\_A  
 $p = 0.00015$ ,  $\beta = 0.227$ ,  $N = 1209$

**P01889 NP2**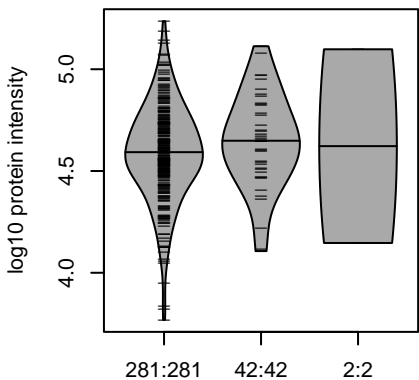

rs3130283  
 $p = 0.16$ ,  $\beta = 0.211$ ,  $N = 325$

**SWTAADTAAQITQR pc2**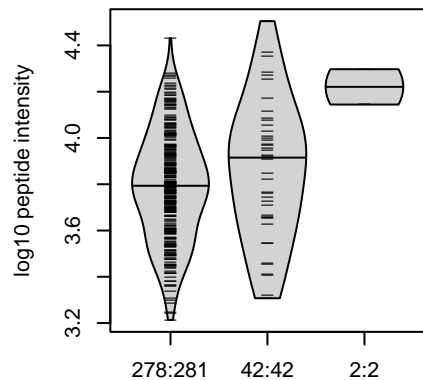

rs3130283  
 $p = 0.01$ ,  $\beta = 0.382$ ,  $N = 322$

**DYIALNEDLR pc2**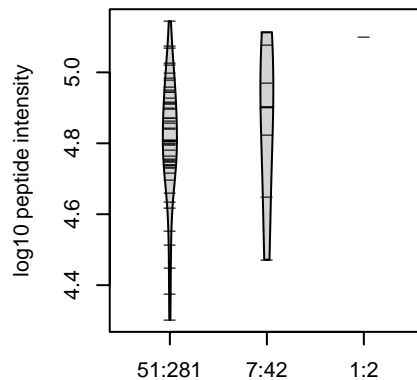

rs3130283  
 $p = 0.11$ ,  $\beta = 0.49$ ,  $N = 59$

**THVTHHPISDHEATLR pc3**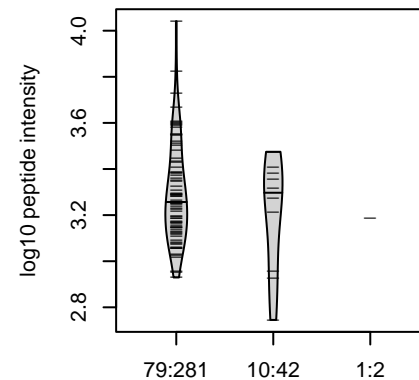

rs3130283  
 $p = 0.18$ ,  $\beta = -0.371$ ,  $N = 90$

**APWIEQEGPEYWDR pc2**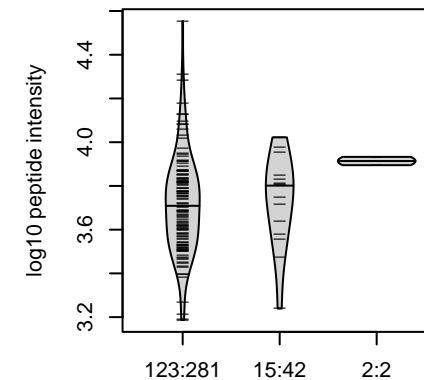

rs3130283  
 $p = 0.23$ ,  $\beta = 0.262$ ,  $N = 140$

Locus: 102 (Sort: 121)  
 Status: Not replicated  
 80% power: No  
 SNP: 6:32138545:A:C  
 rsID: rs3130283  
 UniProtID: P01889  
 HGNC gene: HLA-B  
 Type: Cis-pQTL

**FISVG YVDDTQFVR pc2  
rs1050437 REF**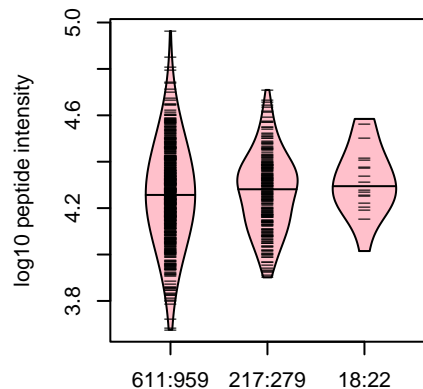

6:32138545:A:C\_A  
 $p = 3.1e-06$ , model = REC,  $N = 846$

**GEPRFISVG YVDDTQFVR pc3  
rs1050437 REF**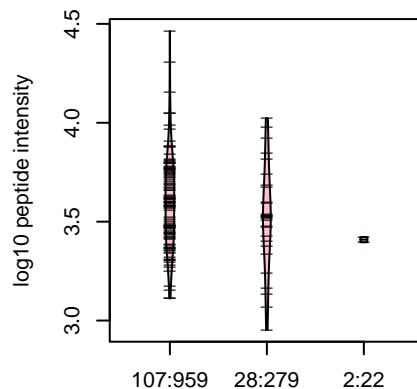

6:32138545:A:C\_A  
 $p = 0.6$ , model = REC,  $N = 137$

**WAAVVVPSGEEQR pc2  
rs707908;rs1736924 ALT**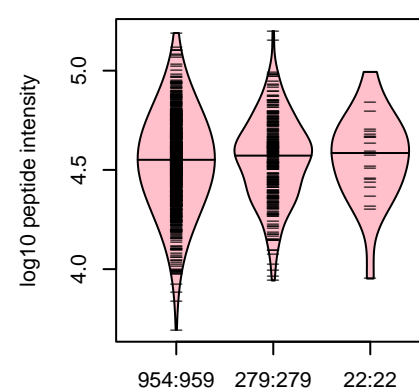

6:32138545:A:C\_A  
 $p = 0.6$ , model = REC,  $N = 1255$



**MAN1C1 [trans]**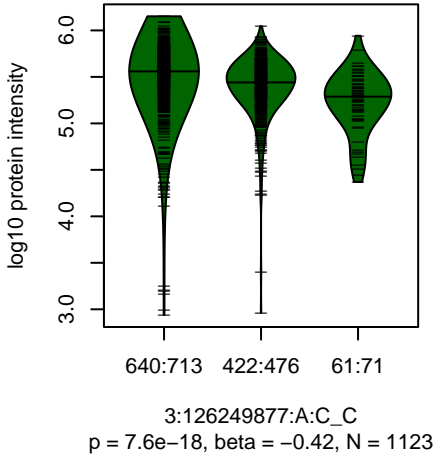**ELAAQITK pc2**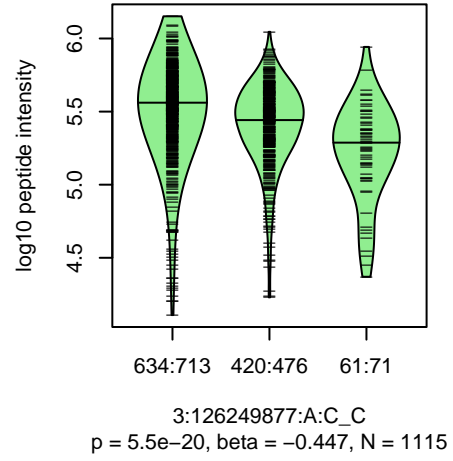**LLPAFNTPTGIPK pc2**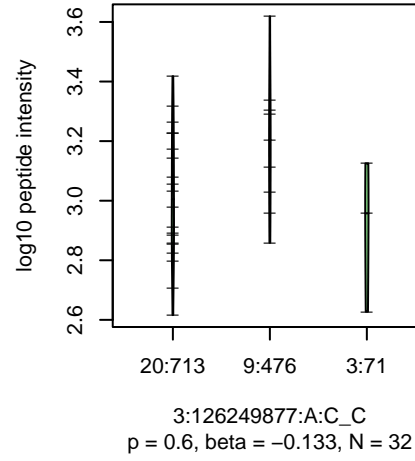**TQQPGLVVAEIAGHAPAR pc3**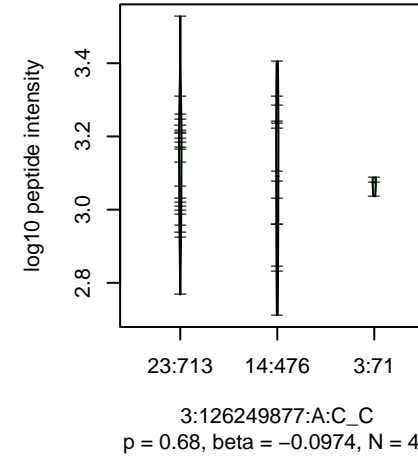**Q9NR34 NP2**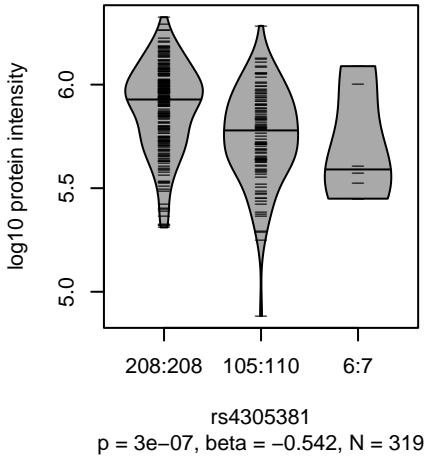**ELAAQITK pc2**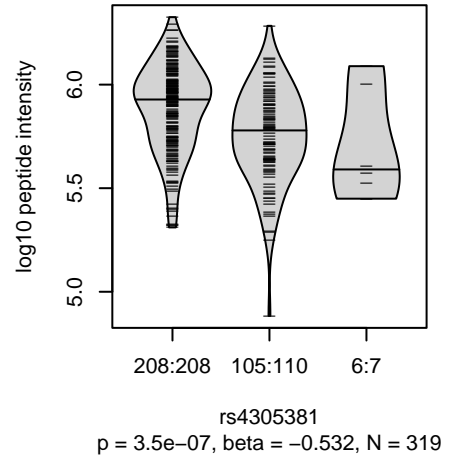

Locus: 103 (Sort: 122)  
 Status: Replicated  
 80% power: Yes  
 SNP: 3:126249877:A:C  
 rsID: rs4305381  
 UniProtID: Q9NR34  
 HGNC gene: MAN1C1  
 Type: Trans-pQTL

**HEG1 [cis]**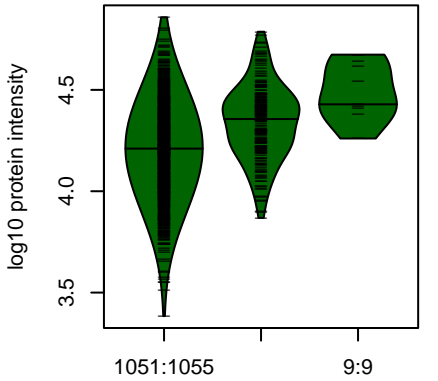

3:124756589:C:T\_T  
 $p = 7.7e-18$ ,  $\beta = 0.606$ ,  $N = 1254$

**ALSLAPLAGAGLELQLER pc2**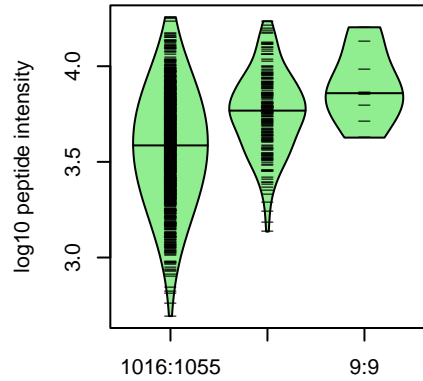

3:124756589:C:T\_T  
 $p = 9.6e-19$ ,  $\beta = 0.625$ ,  $N = 1218$

**EGVMVQTS GK pc2**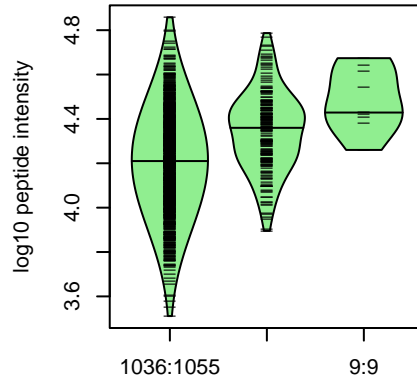

3:124756589:C:T\_T  
 $p = 3.9e-18$ ,  $\beta = 0.614$ ,  $N = 1237$

**SGTASEMGTER pc2**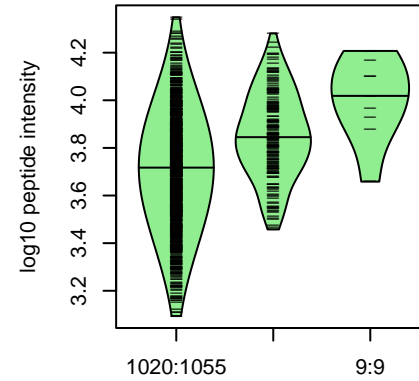

3:124756589:C:T\_T  
 $p = 4.6e-17$ ,  $\beta = 0.597$ ,  $N = 1219$

**TMHVATVFTDGGPR pc3**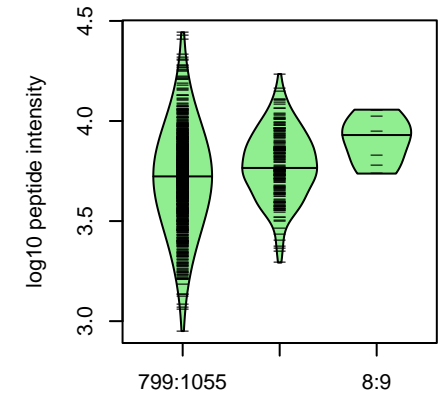

3:124756589:C:T\_T  
 $p = 2.2e-06$ ,  $\beta = 0.35$ ,  $N = 996$

**Q9ULI3 NP2**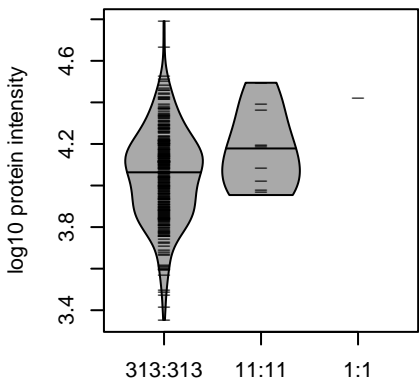

rs4679257  
 $p = 0.0051$ ,  $\beta = 0.725$ ,  $N = 325$

**ALSLAPLAGAGLELQLER pc2**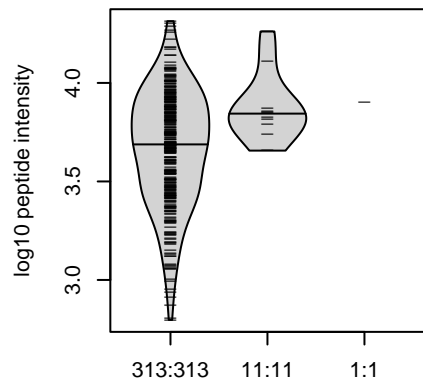

rs4679257  
 $p = 0.0089$ ,  $\beta = 0.676$ ,  $N = 325$

**SGTASEMGTER pc2**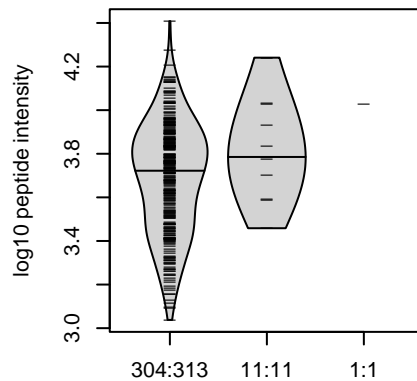

rs4679257  
 $p = 0.01$ ,  $\beta = 0.666$ ,  $N = 316$

**EGVMVQTS GK pc2**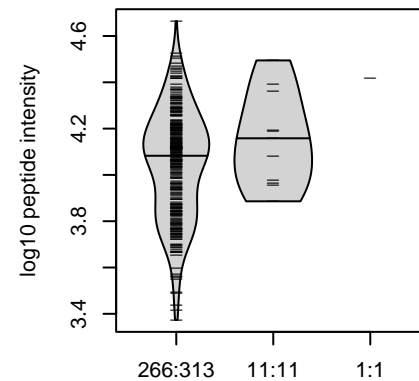

rs4679257  
 $p = 0.011$ ,  $\beta = 0.655$ ,  $N = 278$

**SLTVSLGPVSK pc2**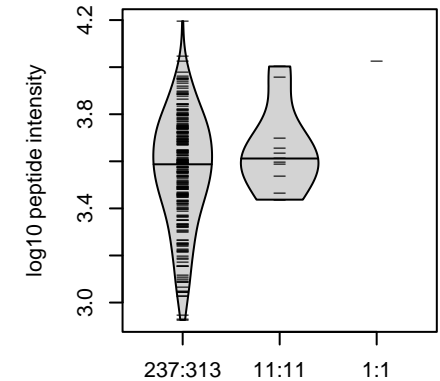

rs4679257  
 $p = 0.02$ ,  $\beta = 0.603$ ,  $N = 249$

Locus: 104 (Sort: 123)

Status: Not replicated

80% power: No

SNP: 3:124756589:C:T

rsID: rs4679257

UniProtID: Q9ULI3

HGNC gene: HEG1

Type: Cis-pQTL

**PZP [cis]**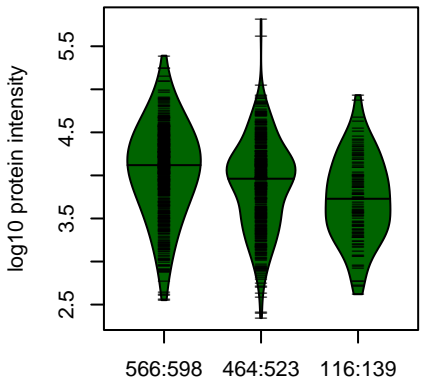

12:9362168:T:C\_T  
 $p = 7.9e-18$ ,  $\beta = -0.375$ ,  $N = 1146$

**GSFALSFPVESDVAPIAR pc2**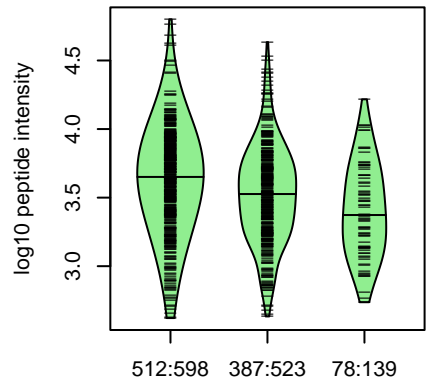

12:9362168:T:C\_T  
 $p = 4.2e-16$ ,  $\beta = -0.399$ ,  $N = 977$

**SLFTDLVAEK pc2**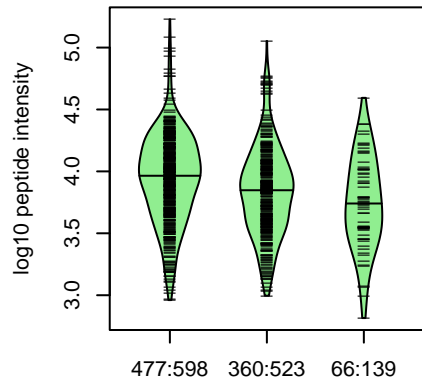

12:9362168:T:C\_T  
 $p = 6.2e-13$ ,  $\beta = -0.374$ ,  $N = 903$

**NELIPLIYLENPR pc2**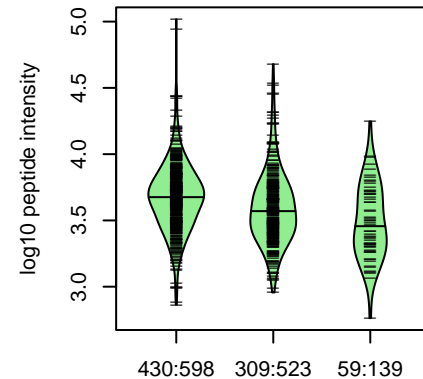

12:9362168:T:C\_T  
 $p = 1.1e-12$ ,  $\beta = -0.392$ ,  $N = 798$

**ALLAYAFSLLGK pc2**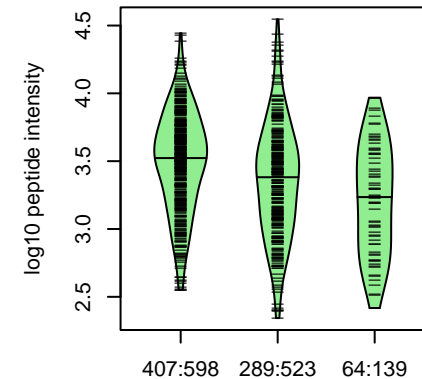

12:9362168:T:C\_T  
 $p = 9.6e-12$ ,  $\beta = -0.375$ ,  $N = 760$

**P20742 NP4**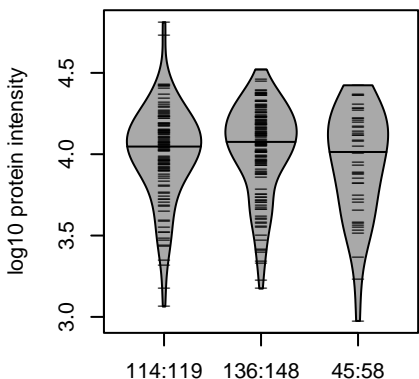

rs1035849  
 $p = 0.27$ ,  $\beta = -0.0922$ ,  $N = 295$

**GSFALSFPVESDVAPIAR pc2**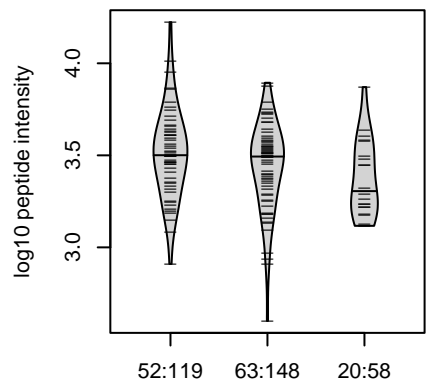

rs1035849  
 $p = 6.5e-06$ ,  $\beta = -0.529$ ,  $N = 135$

**SLFTDLVAEK pc2**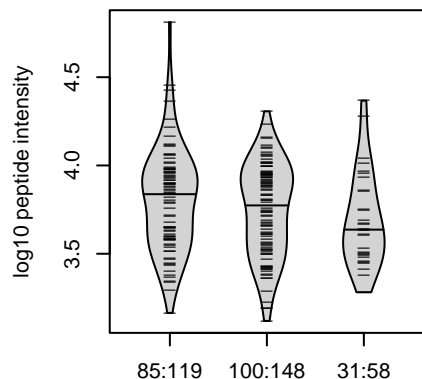

rs1035849  
 $p = 4.1e-05$ ,  $\beta = -0.391$ ,  $N = 216$

**TLLVEAEGIEQEK pc2**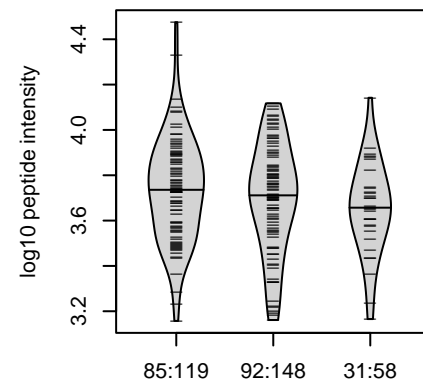

rs1035849  
 $p = 0.00031$ ,  $\beta = -0.346$ ,  $N = 208$

**ISEITNIVSK pc2**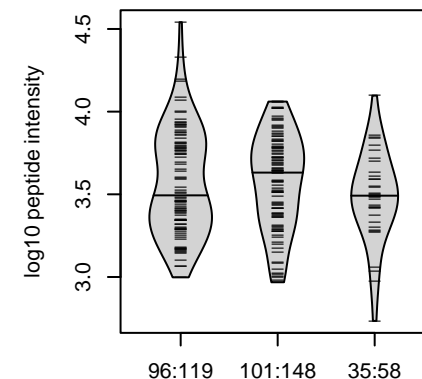

rs1035849  
 $p = 0.00079$ ,  $\beta = -0.305$ ,  $N = 232$

**GEESYCIGSER pc2  
rs3213831 ALT**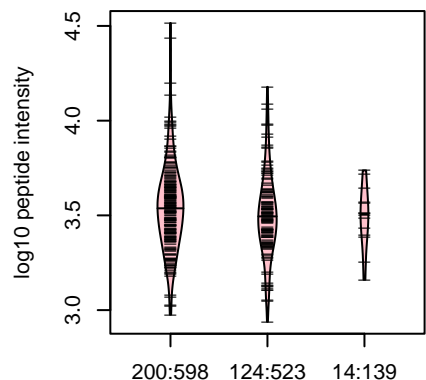

12:9362168:T:C\_T  
 $p = 4.5e-07$ ,  $\text{model} = \text{DOM}$ ,  $N = 338$

**GEESYCIGNER pc2  
rs3213831 REF**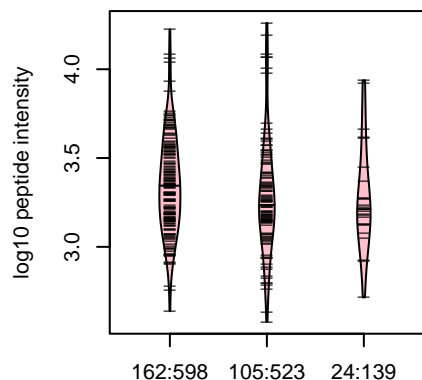

12:9362168:T:C\_T  
 $p = 0.0016$ ,  $\text{model} = \text{REC}$ ,  $N = 291$

Locus: 105 (Sort: 124)  
 Status: Not replicated  
 80% power: No  
 SNP: 12:9362168:T:C  
 rsID: rs1035849  
 UniProtID: P20742  
 HGNC gene: PZP  
 Type: Cis-pQTL

**MIA-RAB4B [cis]**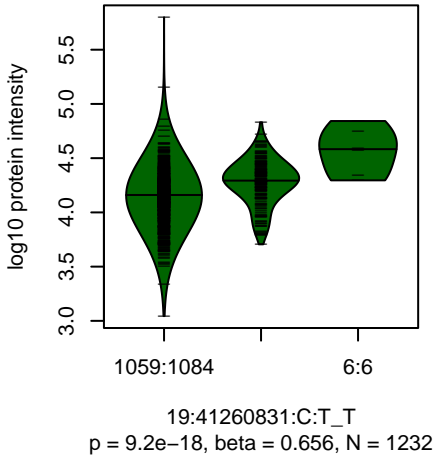**LGYPSSIVR pc2**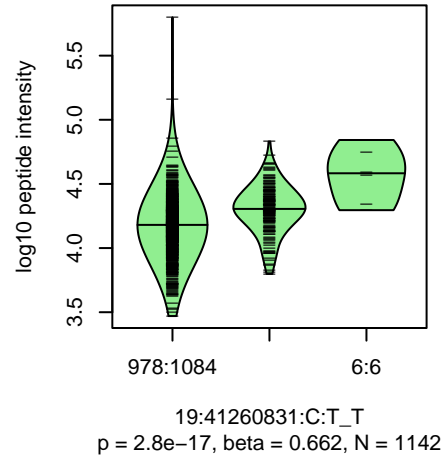**GQVVYVFSK pc2**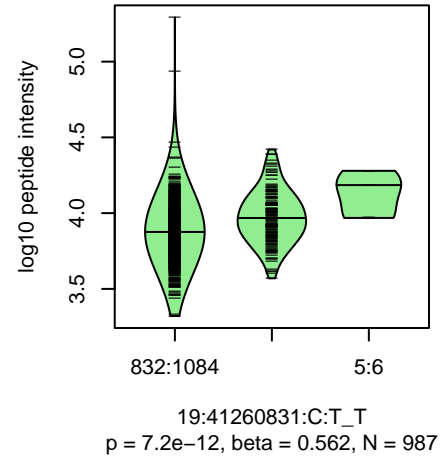**EDQTLKPGK pc2**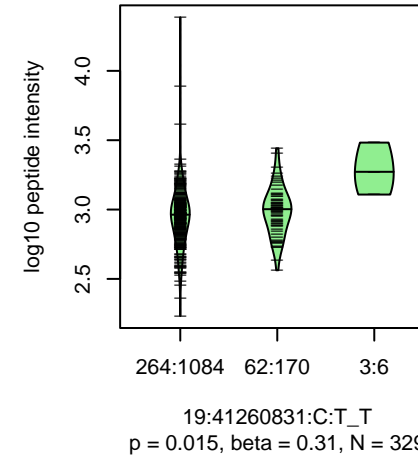**W4VSR3 NP3**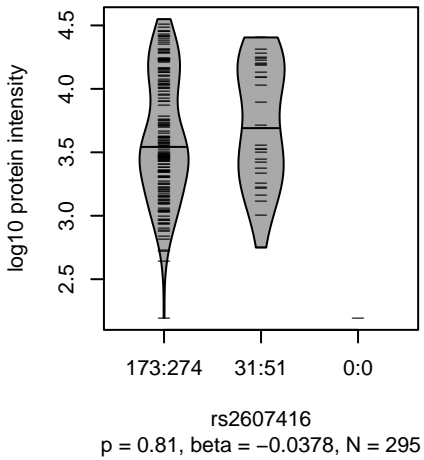**NELIPLIYLENPRR pc3**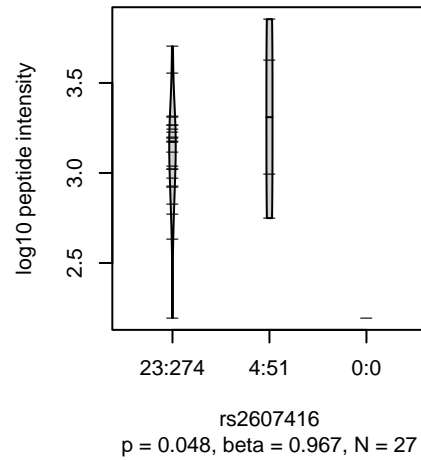**AVGYLITGYQR pc2**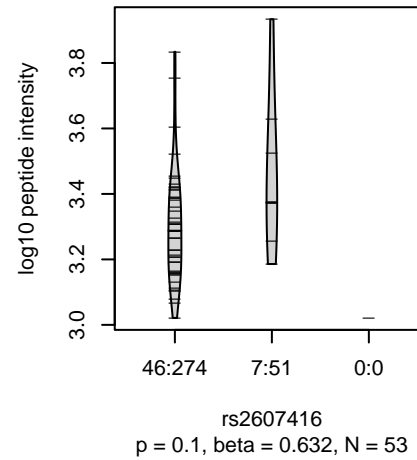**MVSGFIPLKPTVK pc3**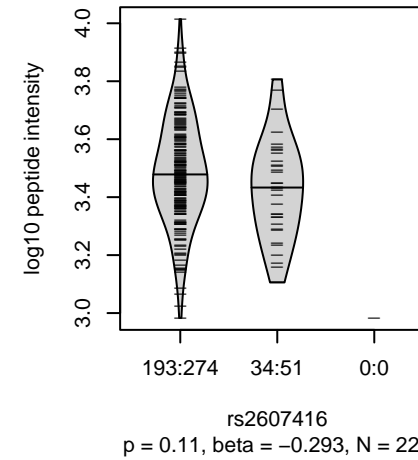**NQGNTWLTAFLK pc2**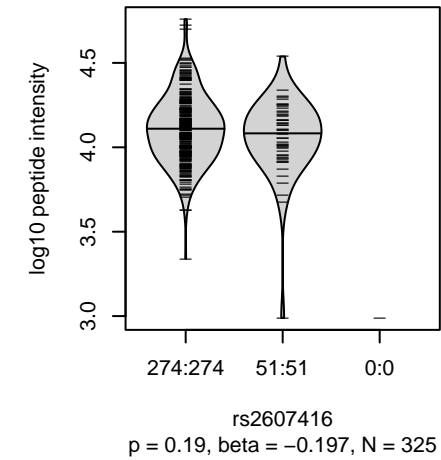**GEESYCIGSER pc2  
rs3213831 ALT**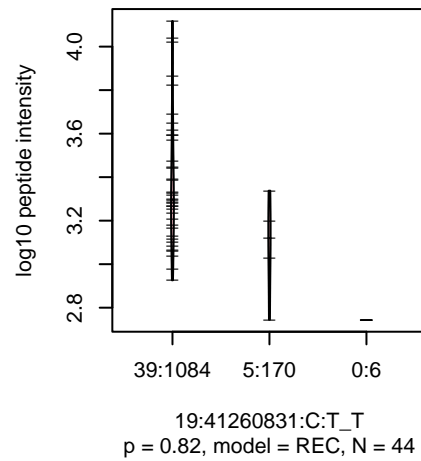

Locus: 106 (Sort: 125)  
 Status: Not replicated  
 80% power: No  
 SNP: 19:41260831:C:T  
 rsID: rs2607416  
 UniProtID: W4VSR3  
 HGNC gene: MIA-RAB4B  
 Type: Cis-pQTL

**FUT8 [cis]**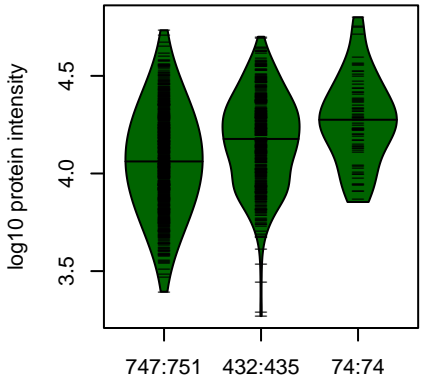

14:65779904:T:C\_T  
 $p = 9.8e-18$ ,  $\beta = 0.393$ ,  $N = 1253$

**VYLATDDPSLLK pc2**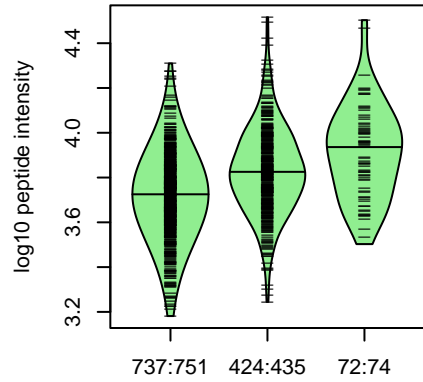

14:65779904:T:C\_T  
 $p = 2.9e-29$ ,  $\beta = 0.514$ ,  $N = 1233$

**TLILESQNR pc2**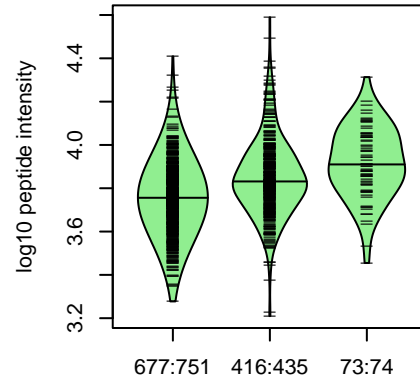

14:65779904:T:C\_T  
 $p = 3.8e-27$ ,  $\beta = 0.501$ ,  $N = 1166$

**VHGDPVWVVSQFVK pc3**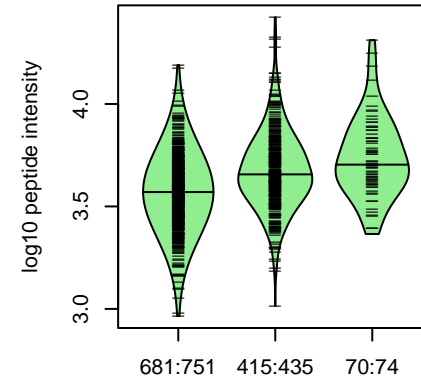

14:65779904:T:C\_T  
 $p = 1.8e-24$ ,  $\beta = 0.479$ ,  $N = 1166$

**ELWFFLQSELK pc2**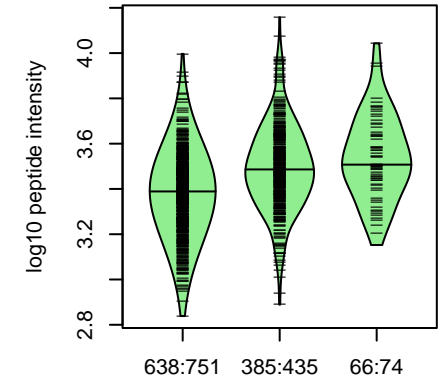

14:65779904:T:C\_T  
 $p = 2.4e-24$ ,  $\beta = 0.493$ ,  $N = 1089$

**Q9BYC5 NP3**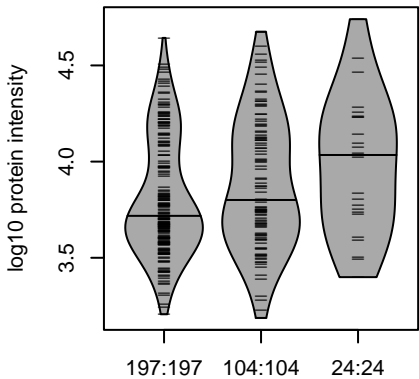

rs4899172  
 $p = 0.005$ ,  $\beta = 0.244$ ,  $N = 325$

**VYLATDDPSLLK pc2**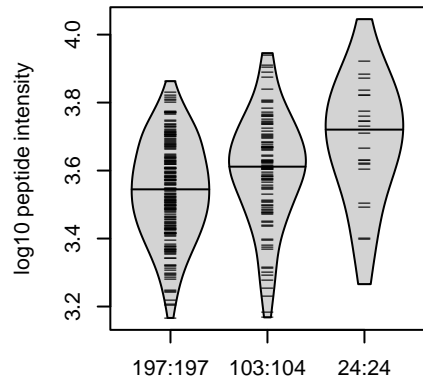

rs4899172  
 $p = 4.3e-07$ ,  $\beta = 0.432$ ,  $N = 324$

**VHGDPVWVVSQFVK pc3**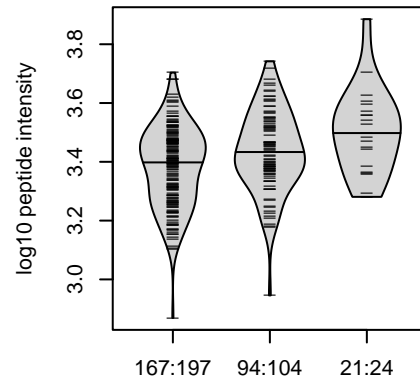

rs4899172  
 $p = 5.7e-05$ ,  $\beta = 0.369$ ,  $N = 282$

**TLILESQNR pc2**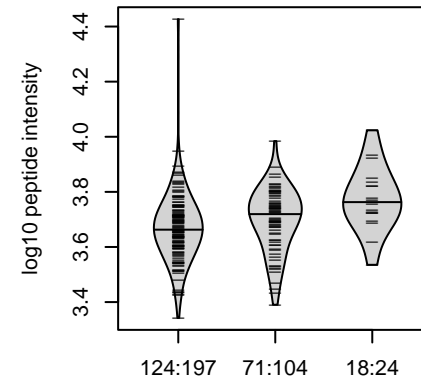

rs4899172  
 $p = 0.00086$ ,  $\beta = 0.343$ ,  $N = 213$

**ITYLQNPk pc2**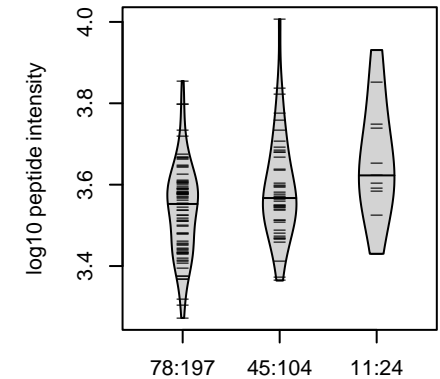

rs4899172  
 $p = 0.0017$ ,  $\beta = 0.404$ ,  $N = 134$

Locus: 107 (Sort: 126)

Status: Not replicated

80% power: No

SNP: 14:65779904:T:C

rsID: rs4899172

UniProtID: Q9BYC5

HGNC gene: FUT8

Type: Cis-pQTL

**FETUB [cis]**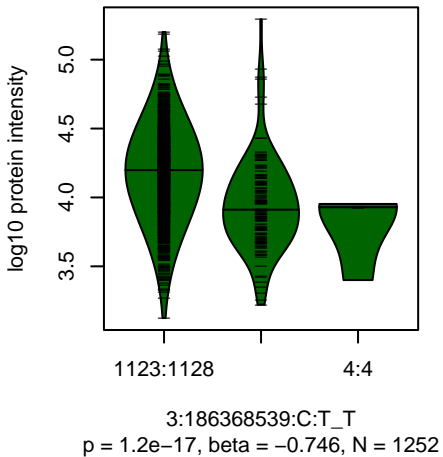**LVVLPFPK pc2**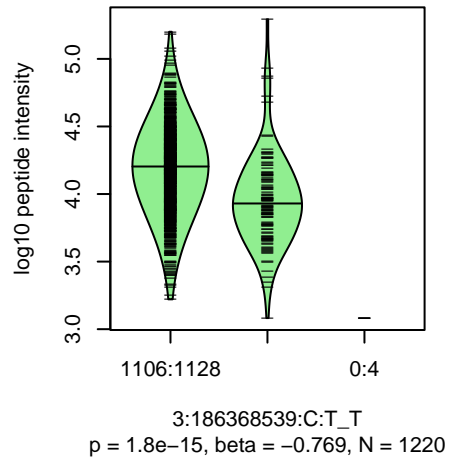**IFFESVYGQCK pc2**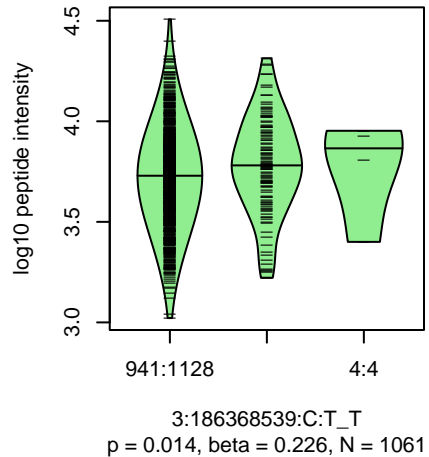**AIFYMNNPSR pc2**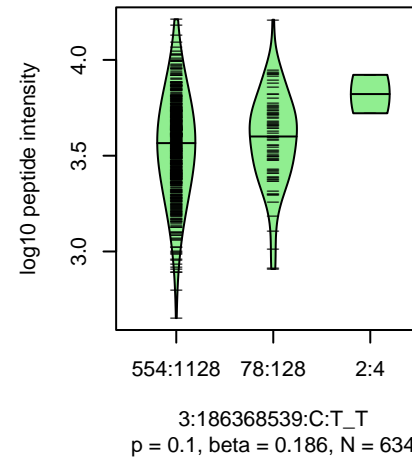**GSVQYLPDLDDK pc2**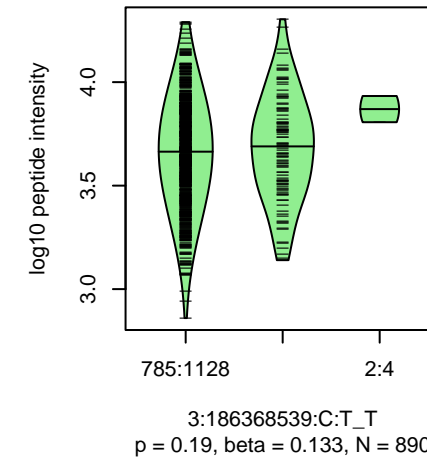**Q9UGM5 NP4**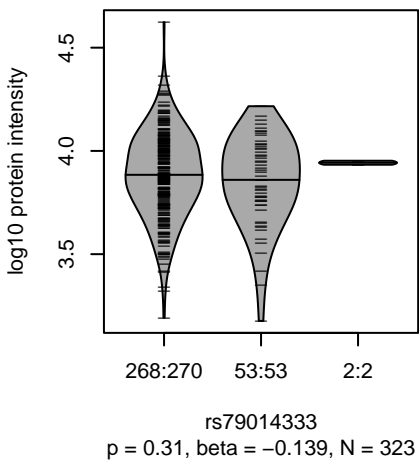**AIFYMNNPSR pc2**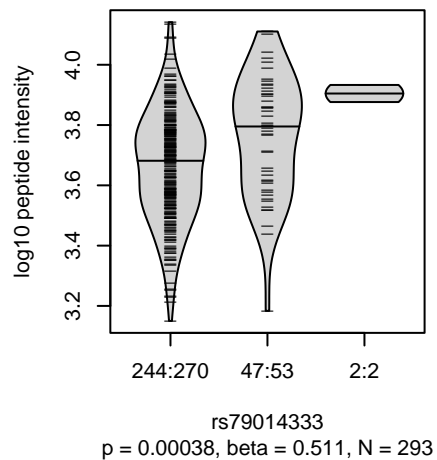**LVVLPFPK pc2**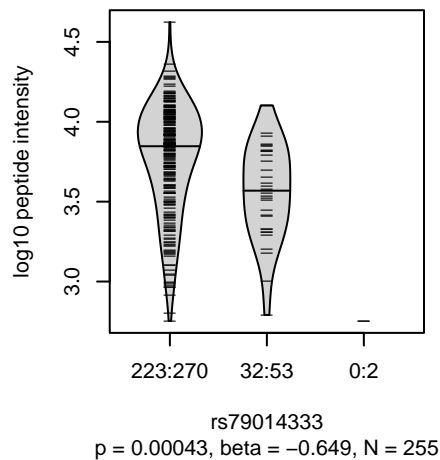**IFFESVYGQCK pc2**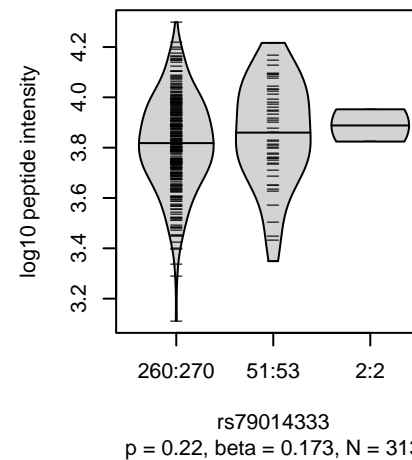**GSVQYLPDLDDK pc2**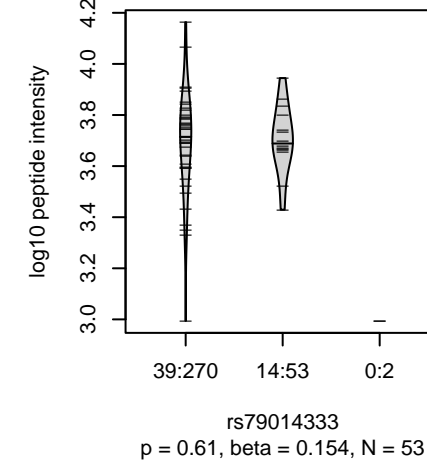

Locus: 108 (Sort: 127)  
 Status: Not replicated  
 80% power: No  
 SNP: 3:186368539:C:T  
 rsID: rs79014333  
 UniProtID: Q9UGM5  
 HGNC gene: FETUB  
 Type: Cis-pQTL

**HP [cis]**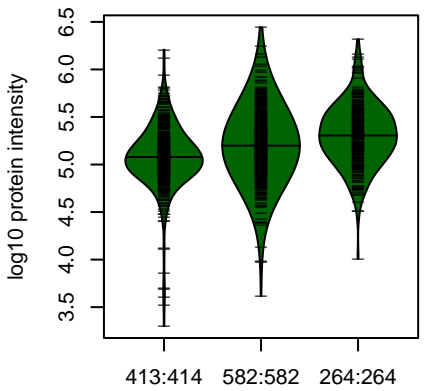

16:72225786:C:T\_T  
 $p = 1.4e-17$ ,  $\beta = 0.326$ ,  $N = 1259$

**VTSIQDWVQK pc2**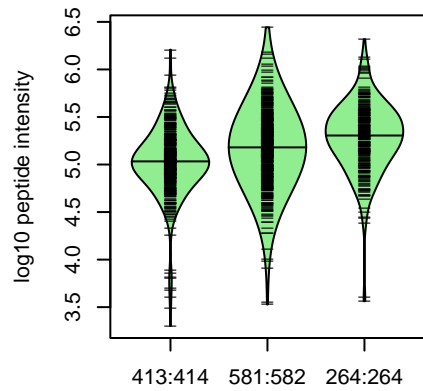

16:72225786:C:T\_T  
 $p = 1e-18$ ,  $\beta = 0.337$ ,  $N = 1258$

**TEGDGVYTLNNEK pc2**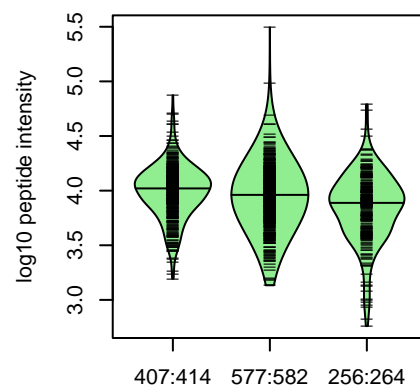

16:72225786:C:T\_T  
 $p = 2e-09$ ,  $\beta = -0.233$ ,  $N = 1240$

**LRTEGDGVYTLNNEK pc3**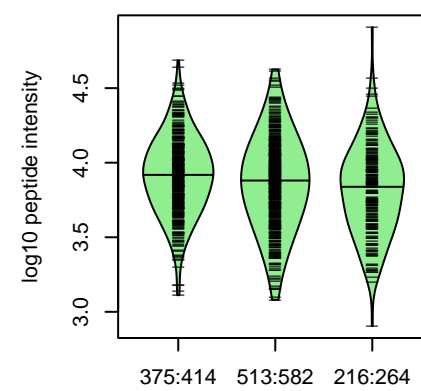

16:72225786:C:T\_T  
 $p = 5.4e-05$ ,  $\beta = -0.168$ ,  $N = 1104$

**DYAEVGR pc2**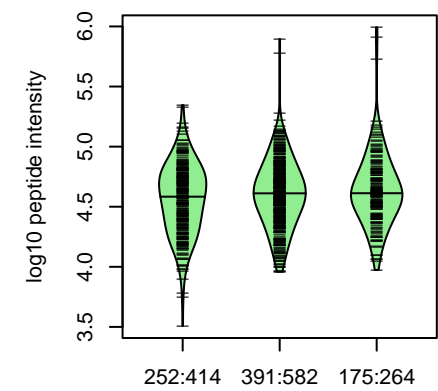

16:72225786:C:T\_T  
 $p = 0.033$ ,  $\beta = 0.103$ ,  $N = 818$

**P00738 NP4**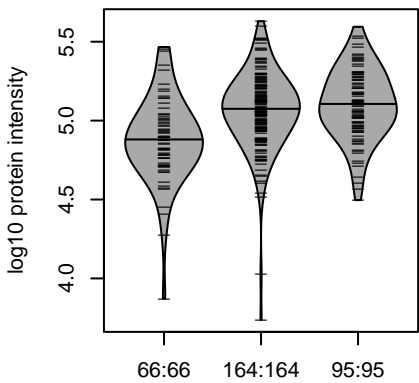

rs3852788  
 $p = 3.2e-06$ ,  $\beta = 0.365$ ,  $N = 325$

**VTSIQDWVQK pc2**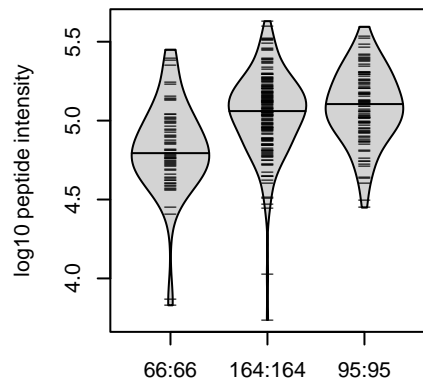

rs3852788  
 $p = 1e-07$ ,  $\beta = 0.409$ ,  $N = 325$

**LRTEGDGVYTLNNEK pc2**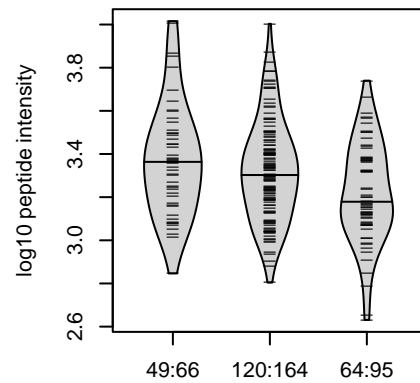

rs3852788  
 $p = 0.00047$ ,  $\beta = -0.321$ ,  $N = 233$

**SPVGVQPILNEHTFCAGMSK pc3**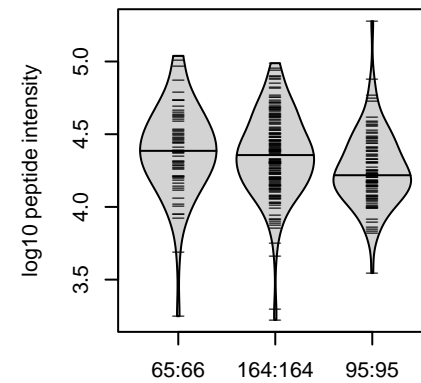

rs3852788  
 $p = 0.00068$ ,  $\beta = -0.266$ ,  $N = 324$

**TEGDGVYTLNNEK pc2**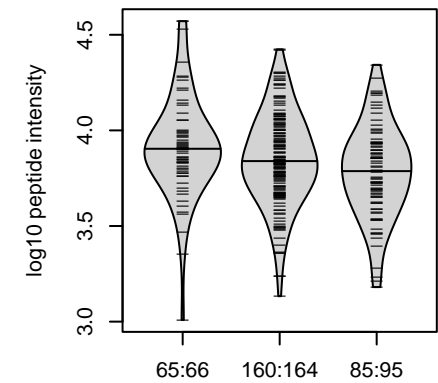

rs3852788  
 $p = 7e-04$ ,  $\beta = -0.272$ ,  $N = 310$

Locus: 109 (Sort: 128)

Status: Replicated

80% power: No

SNP: 16:72225786:C:T

rsID: rs3852788

UniProtID: P00738

HGNC gene: HP

Type: Cis-pQTL

**GALNT12 [cis]**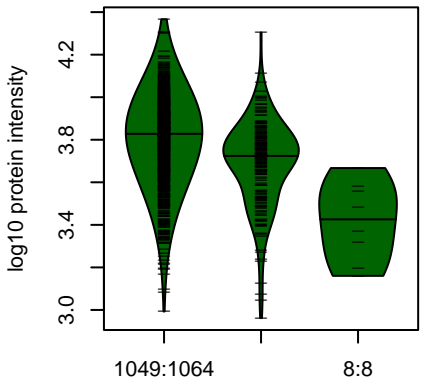

9:101570336:A:T\_T  
 $p = 2.2e-17$ ,  $\beta = -0.616$ ,  $N = 1240$

**LANELSGLPK pc2**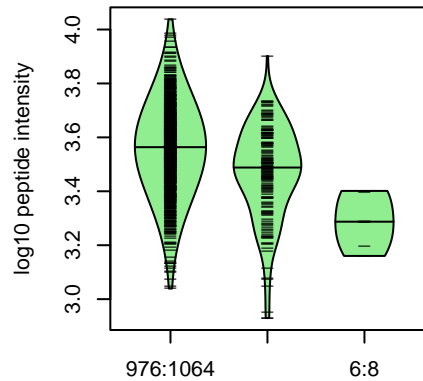

9:101570336:A:T\_T  
 $p = 5.1e-13$ ,  $\beta = -0.56$ ,  $N = 1146$

**AAEVWMEFK pc2**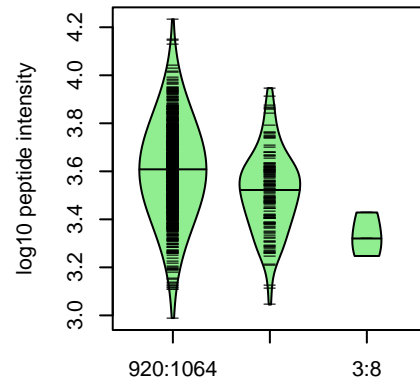

9:101570336:A:T\_T  
 $p = 1.5e-10$ ,  $\beta = -0.539$ ,  $N = 1070$

**ESSDSFVPLLR pc2**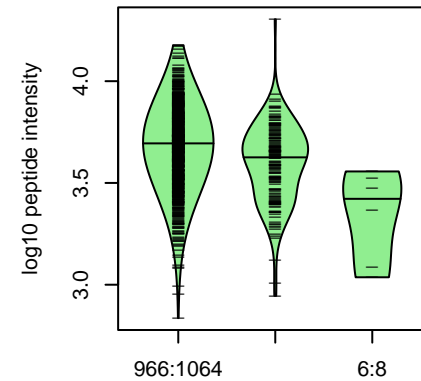

9:101570336:A:T\_T  
 $p = 2.6e-10$ ,  $\beta = -0.498$ ,  $N = 1131$

**MQSPVDVIR pc2**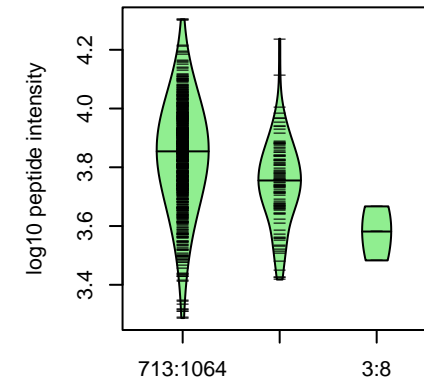

9:101570336:A:T\_T  
 $p = 5.8e-08$ ,  $\beta = -0.533$ ,  $N = 819$

**Q8IXK2 NP5**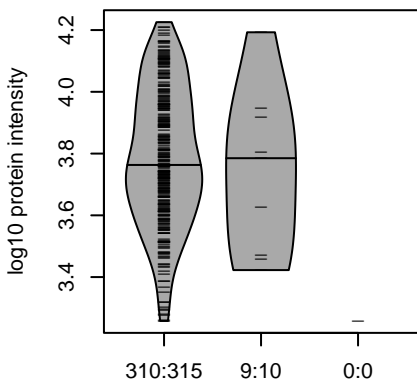

rs1137654  
 $p = 0.66$ ,  $\beta = -0.147$ ,  $N = 319$

**ESSDSFVPLLR pc2**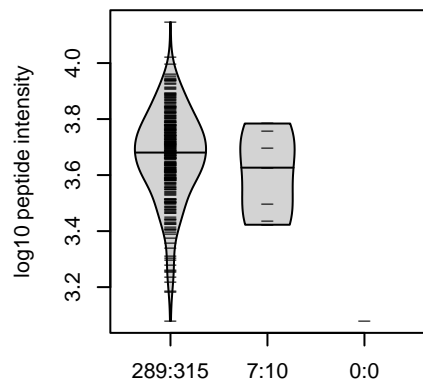

rs1137654  
 $p = 0.16$ ,  $\beta = -0.533$ ,  $N = 296$

**SPTMAGGLFAVSK pc2**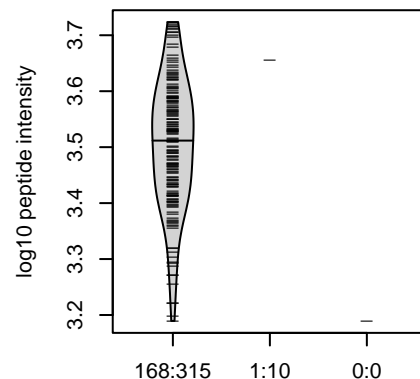

rs1137654  
 $p = 0.27$ ,  $\beta = 1.08$ ,  $N = 169$

**AAEVWMEFK pc2**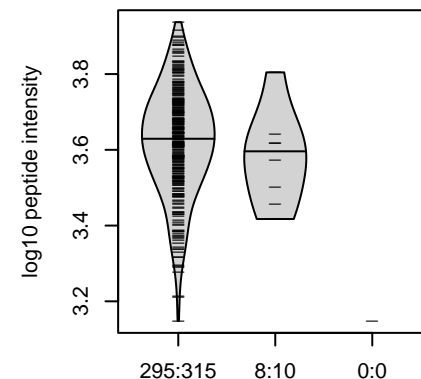

rs1137654  
 $p = 0.32$ ,  $\beta = -0.354$ ,  $N = 303$

**LANELSGLPK pc2**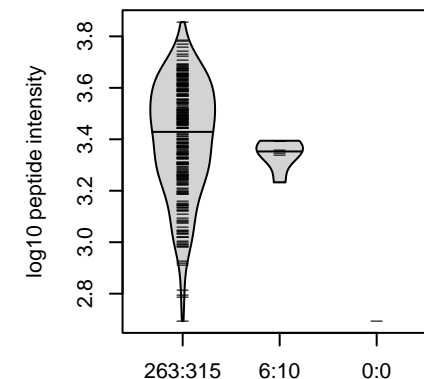

rs1137654  
 $p = 0.51$ ,  $\beta = -0.268$ ,  $N = 269$

Locus: 110 (Sort: 129)

Status: Not replicated

80% power: No

SNP: 9:101570336:A:T

rsID: rs1137654

UniProtID: Q8IXK2

HGNC gene: GALNT12

Type: Cis-pQTL



**TSKU [cis]**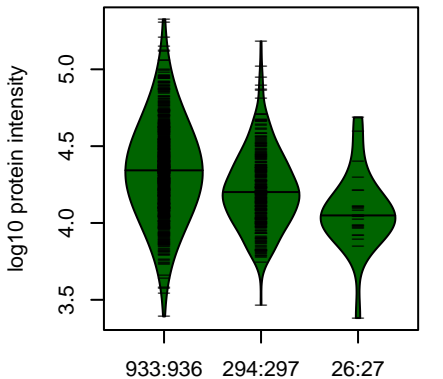

11:76469093:C:T\_T  
 $p = 2.8e-17$ ,  $\beta = -0.477$ ,  $N = 1253$

**EVSVSFTTHSQGR pc3**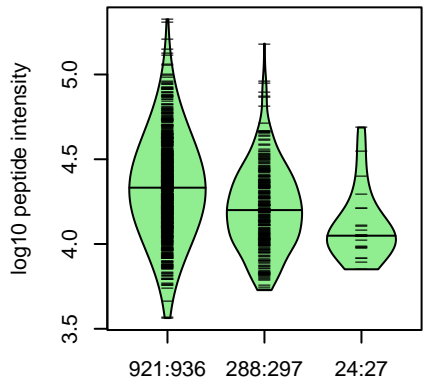

11:76469093:C:T\_T  
 $p = 2.1e-16$ ,  $\beta = -0.472$ ,  $N = 1233$

**ALHVDLSHNLHR pc3**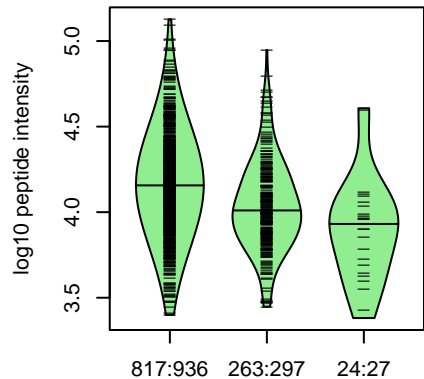

11:76469093:C:T\_T  
 $p = 2.2e-13$ ,  $\beta = -0.438$ ,  $N = 1104$

**VALHCVDTR pc2**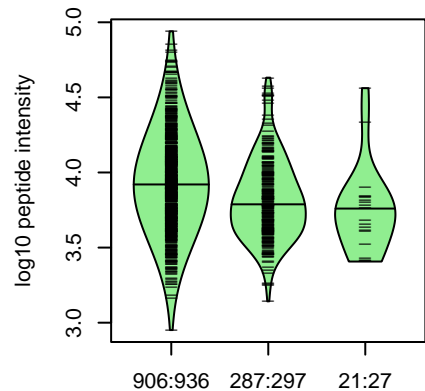

11:76469093:C:T\_T  
 $p = 7.8e-10$ ,  $\beta = -0.362$ ,  $N = 1214$

**LVPHPTR pc2**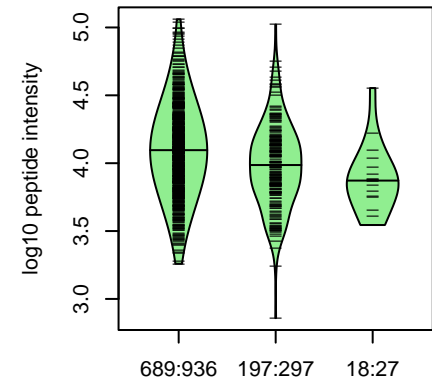

11:76469093:C:T\_T  
 $p = 2.9e-07$ ,  $\beta = -0.351$ ,  $N = 904$

**Q8WUA8 NP5**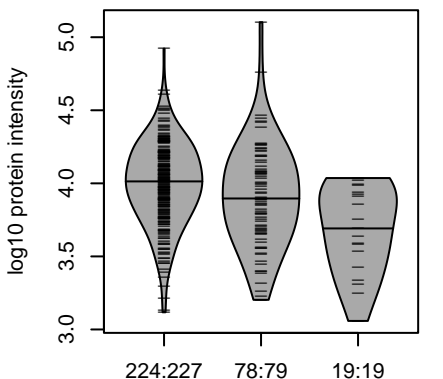

rs1149596  
 $p = 0.00014$ ,  $\beta = -0.353$ ,  $N = 321$

**EVSVSFTTHSQGR pc2**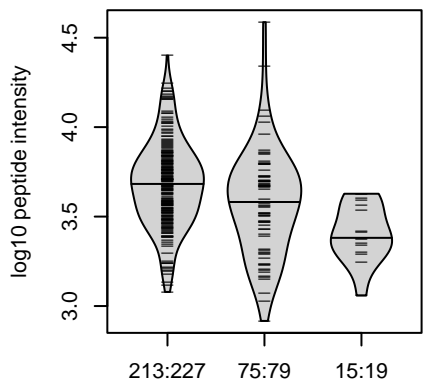

rs1149596  
 $p = 1.6e-05$ ,  $\beta = -0.423$ ,  $N = 303$

**VALHCVDTR pc2**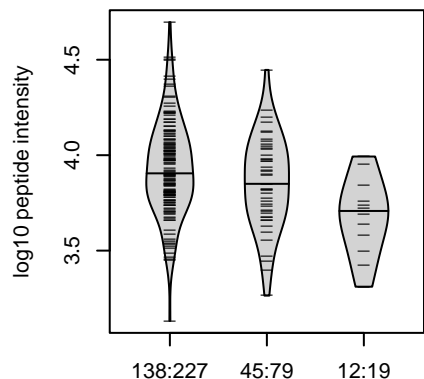

rs1149596  
 $p = 0.0022$ ,  $\beta = -0.36$ ,  $N = 195$

**AGLPPTIQLNLAWNR pc2**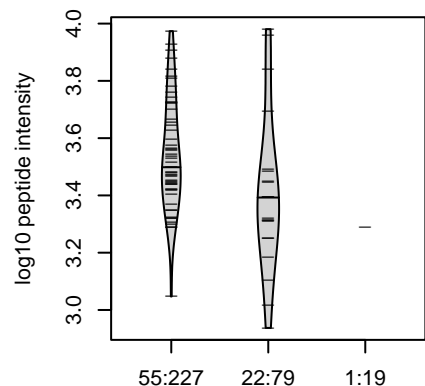

rs1149596  
 $p = 0.0092$ ,  $\beta = -0.571$ ,  $N = 78$

**LPELAPSGFR pc2**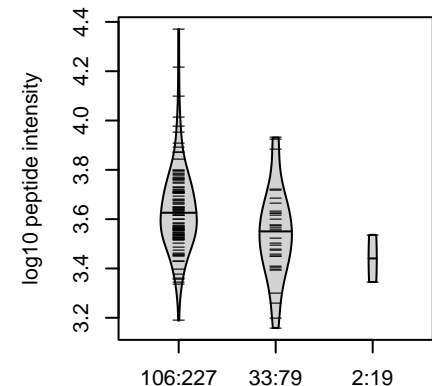

rs1149596  
 $p = 0.01$ ,  $\beta = -0.443$ ,  $N = 141$

Locus: 111 (Sort: 130)

Status: Replicated

80% power: No

SNP: 11:76469093:C:T

rsID: rs1149596

UniProtID: Q8WUA8

HGNC gene: TSKU

Type: Cis-pQTL

**HSP90B1 [cis]**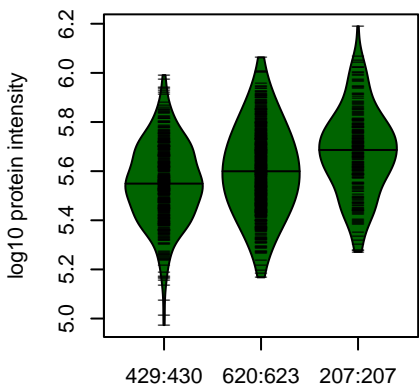

12:104372656:A:G\_A  
 $p = 3e-17$ ,  $\beta = 0.34$ ,  $N = 1256$

**DISTNYASQK pc2**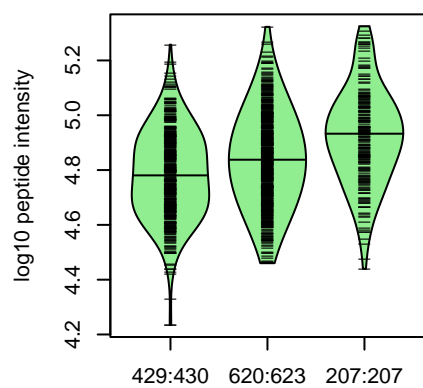

12:104372656:A:G\_A  
 $p = 2.9e-20$ ,  $\beta = 0.37$ ,  $N = 1256$

**EVEEDEYK pc2**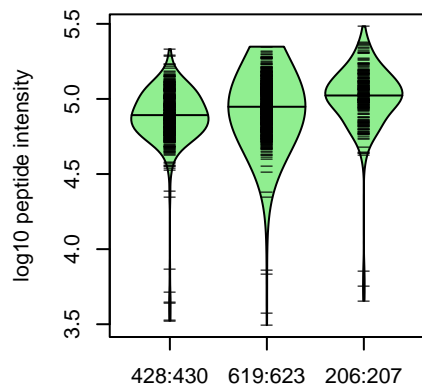

12:104372656:A:G\_A  
 $p = 2.2e-18$ ,  $\beta = 0.352$ ,  $N = 1253$

**EEEEIQLDGLNASQIR pc2**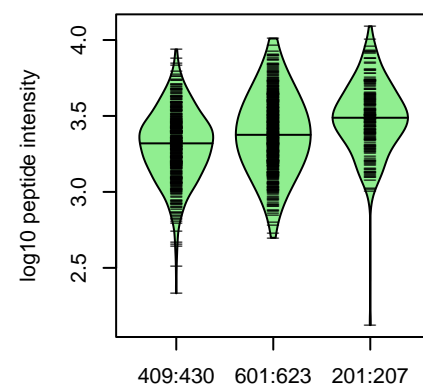

12:104372656:A:G\_A  
 $p = 2.3e-18$ ,  $\beta = 0.358$ ,  $N = 1211$

**LIINSLYK pc2**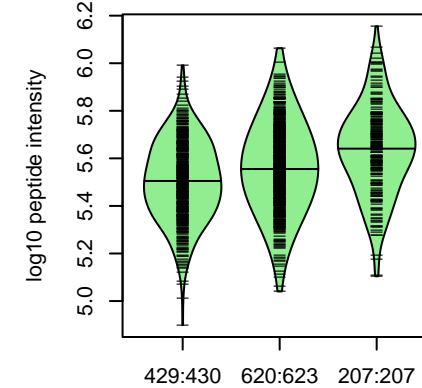

12:104372656:A:G\_A  
 $p = 2.5e-17$ ,  $\beta = 0.34$ ,  $N = 1256$

**P14625 NP2**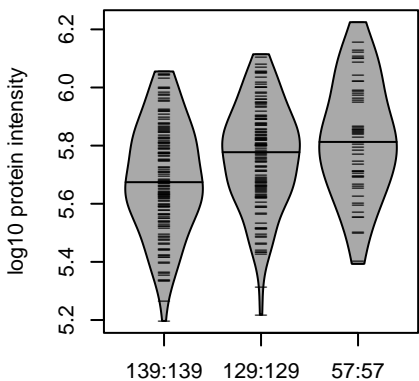

rs10861152  
 $p = 6.2e-06$ ,  $\beta = 0.335$ ,  $N = 325$

**EFEPLLNMWK pc2**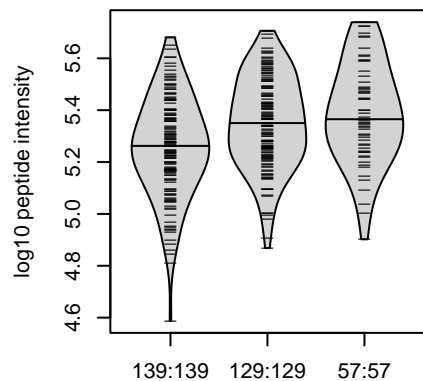

rs10861152  
 $p = 5.9e-06$ ,  $\beta = 0.333$ ,  $N = 325$

**SILFVPTSAPR pc2**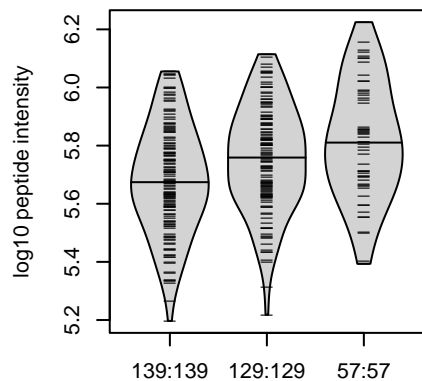

rs10861152  
 $p = 7.8e-06$ ,  $\beta = 0.329$ ,  $N = 325$

**GVVDSDDLPLNVSIR pc2**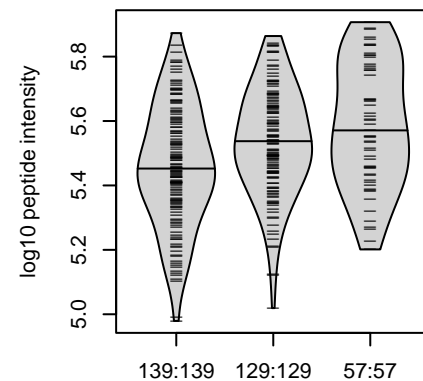

rs10861152  
 $p = 9.9e-06$ ,  $\beta = 0.325$ ,  $N = 325$

**YNDTFWK pc2**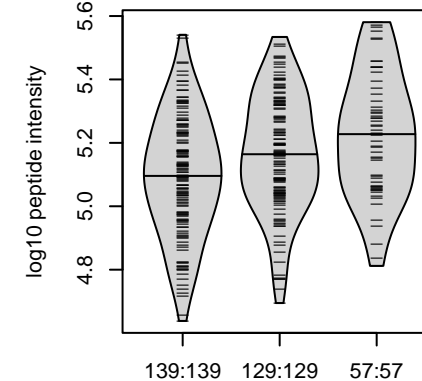

rs10861152  
 $p = 1.4e-05$ ,  $\beta = 0.32$ ,  $N = 325$

Locus: 112 (Sort: 131)

Status: Replicated

80% power: No

SNP: 12:104372656:A:G

rsID: rs10861152

UniProtID: P14625

HGNC gene: HSP90B1

Type: Cis-pQTL

**LTBP3 [cis]**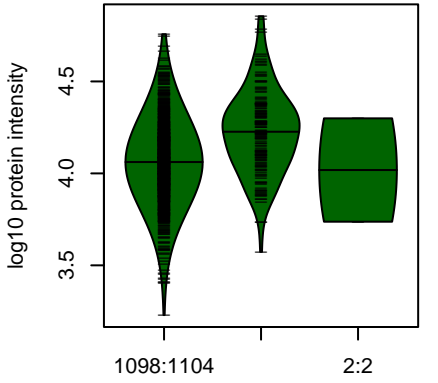

11:65330510:C:T\_T  
 $p = 3.1e-17$ ,  $\beta = 0.698$ ,  $N = 1253$

**GYTQDNNIVNYGIPAHR pc3**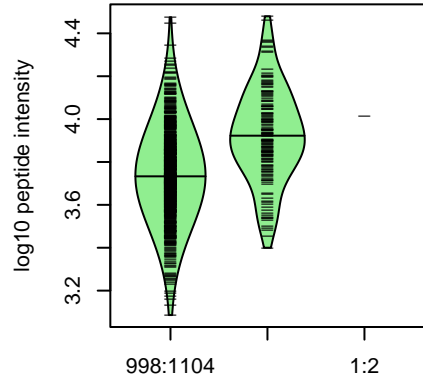

11:65330510:C:T\_T  
 $p = 1.8e-23$ ,  $\beta = 0.845$ ,  $N = 1147$

**DCQLPESPAER pc2**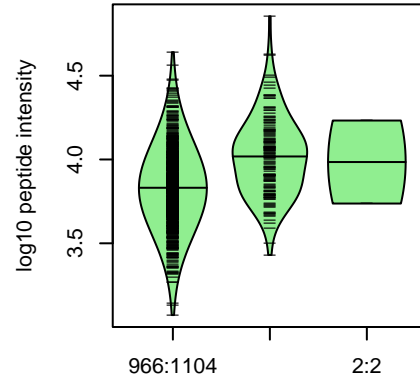

11:65330510:C:T\_T  
 $p = 3.2e-19$ ,  $\beta = 0.753$ ,  $N = 1116$

**IESSNAESAAPSQHLLPHPK pc4**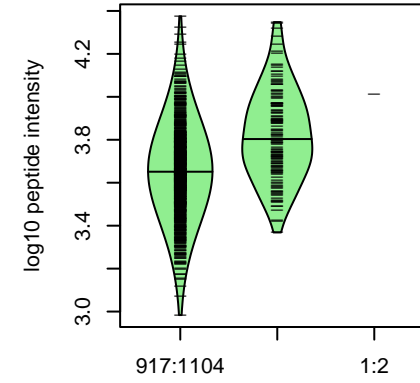

11:65330510:C:T\_T  
 $p = 1.6e-17$ ,  $\beta = 0.748$ ,  $N = 1057$

**CIACQPGYR pc2**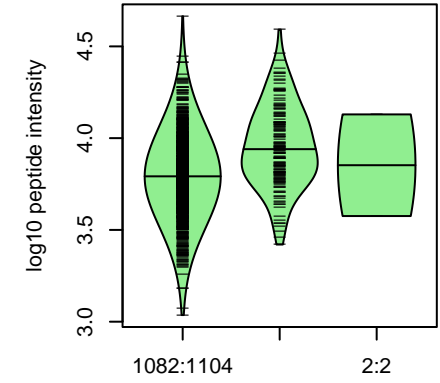

11:65330510:C:T\_T  
 $p = 2.2e-16$ ,  $\beta = 0.683$ ,  $N = 1235$

**Q9NS15 NP5**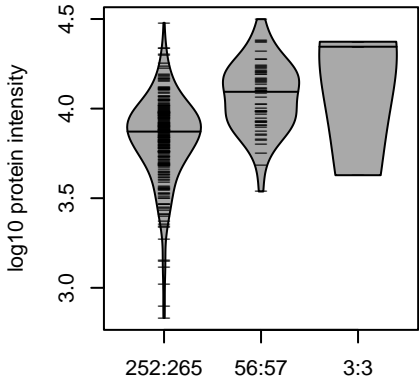

rs11227226  
 $p = 2e-11$ ,  $\beta = 0.857$ ,  $N = 311$

**NQCLCPPDFTGR pc2**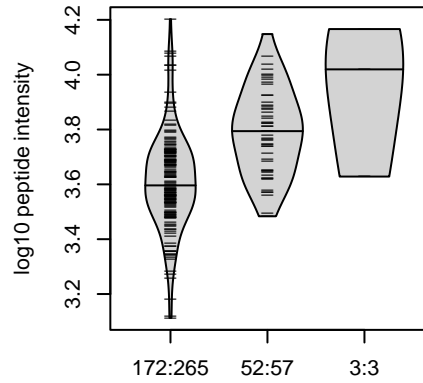

rs11227226  
 $p = 8.4e-12$ ,  $\beta = 0.912$ ,  $N = 227$

**DCQLPESPAER pc2**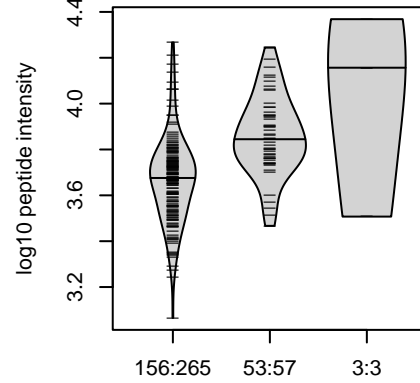

rs11227226  
 $p = 9.3e-11$ ,  $\beta = 0.871$ ,  $N = 212$

**CTCAQGYAPAPDGR pc2**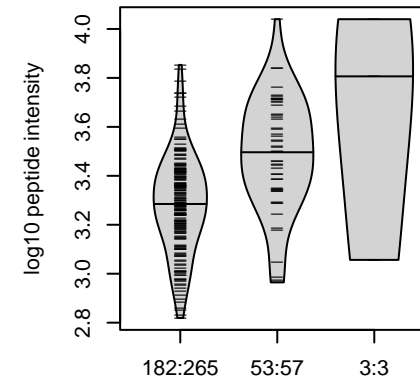

rs11227226  
 $p = 4.4e-10$ ,  $\beta = 0.832$ ,  $N = 238$

**GYTQDNNIVNYGIPAHR pc3**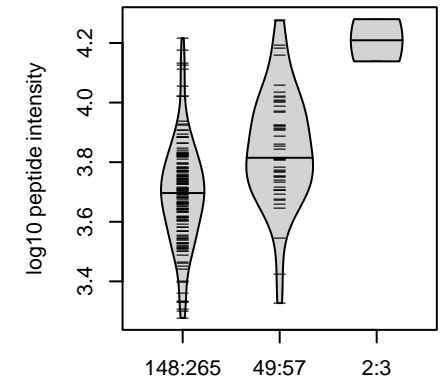

rs11227226  
 $p = 4.9e-09$ ,  $\beta = 0.842$ ,  $N = 199$

Locus: 113 (Sort: 132)

Status: Replicated

80% power: No

SNP: 11:65330510:C:T

rsID: rs11227226

UniProtID: Q9NS15

HGNC gene: LTBP3

Type: Cis-pQTL

**CCL15 [cis]**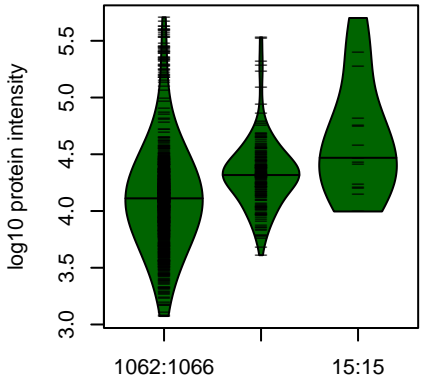

17:34338078:G:A\_G  
 $p = 4.8e-17$ ,  $\beta = 0.579$ ,  $N = 1254$

**SYFETSSECSK pc2**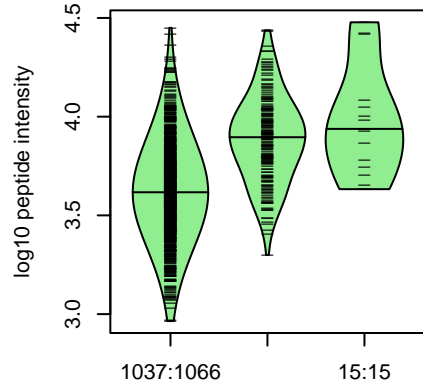

17:34338078:G:A\_G  
 $p = 4.3e-36$ ,  $\beta = 0.854$ ,  $N = 1227$

**PSGPGVQDCMK pc2**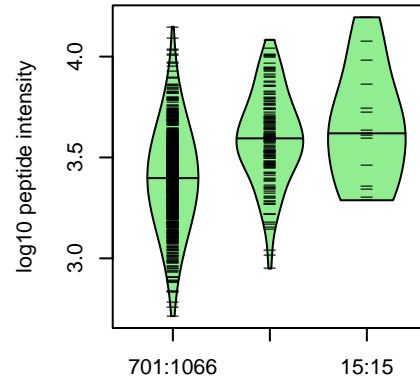

17:34338078:G:A\_G  
 $p = 5.4e-19$ ,  $\beta = 0.654$ ,  $N = 870$

**PGVIFLTK pc2**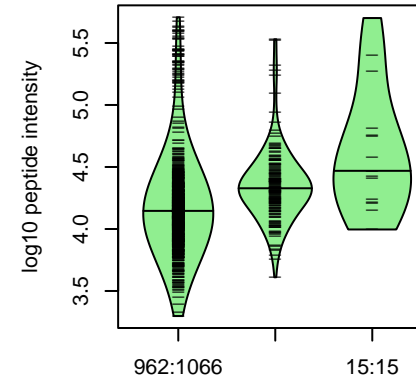

17:34338078:G:A\_G  
 $p = 6.4e-15$ ,  $\beta = 0.549$ ,  $N = 1146$

**Q16663 NP3**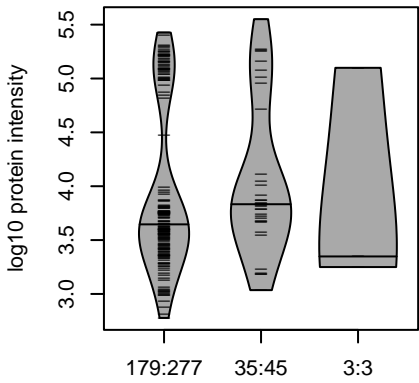

rs1719200  
 $p = 0.23$ ,  $\beta = 0.189$ ,  $N = 217$

**SYFETSSECSK pc2**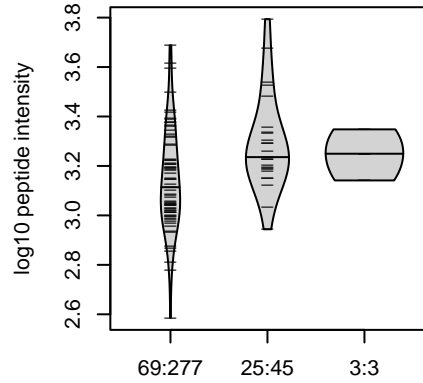

rs1719200  
 $p = 0.007$ ,  $\beta = 0.495$ ,  $N = 97$

**PGVIFLTK pc2**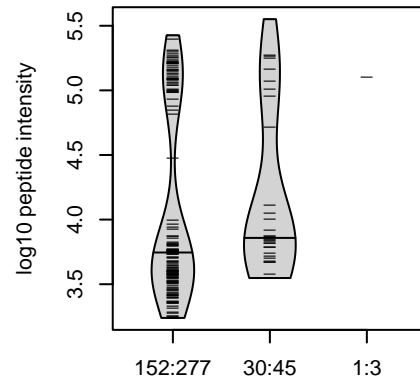

rs1719200  
 $p = 0.028$ ,  $\beta = 0.403$ ,  $N = 183$

Locus: 114 (Sort: 133)

Status: Not replicated

80% power: No

SNP: 17:34338078:G:A

rsID: rs1719200

UniProtID: Q16663

HGNC gene: CCL15

Type: Cis-pQTL

**CDKL3 [trans]**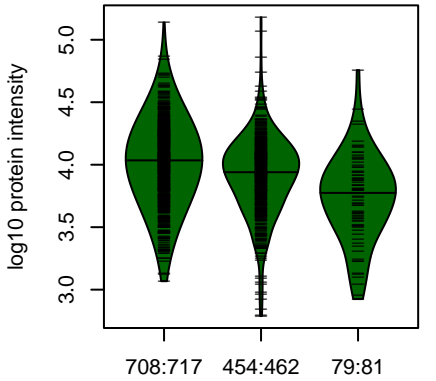

3:186393547:T:C\_C  
 $p = 5.7e-17$ ,  $\beta = -0.38$ ,  $N = 1241$

**YLFQILR pc2**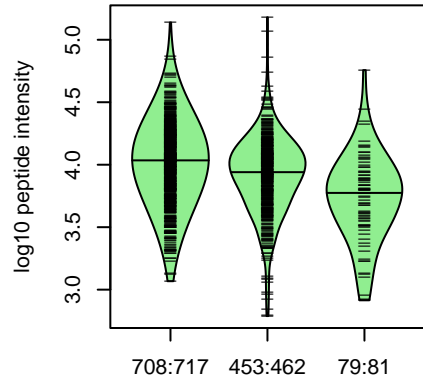

3:186393547:T:C\_C  
 $p = 8.2e-17$ ,  $\beta = -0.378$ ,  $N = 1240$

**LCDFGFAR pc2**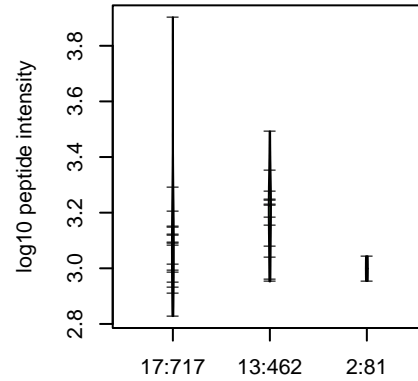

3:186393547:T:C\_C  
 $p = 0.8$ ,  $\beta = 0.0678$ ,  $N = 32$

**Q81VW4 NP1**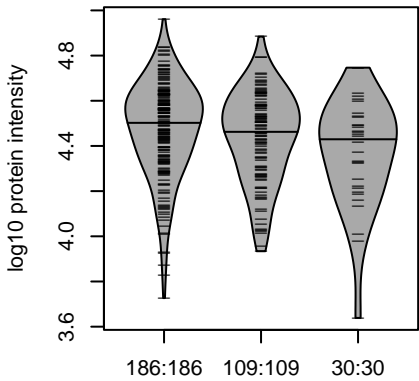

rs7625980  
 $p = 0.034$ ,  $\beta = -0.176$ ,  $N = 325$

**YLFQILR pc2**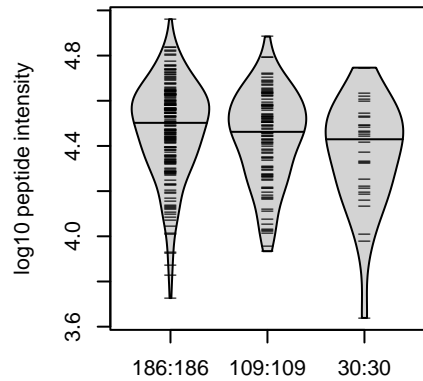

rs7625980  
 $p = 0.037$ ,  $\beta = -0.173$ ,  $N = 325$

Locus: 115 (Sort: 134)

Status: Not replicated

80% power: No

SNP: 3:186393547:T:C

rsID: rs7625980

UniProtID: Q81VW4

HGNC gene: CDKL3

Type: Trans-pQTL

**LGALS4 [trans]**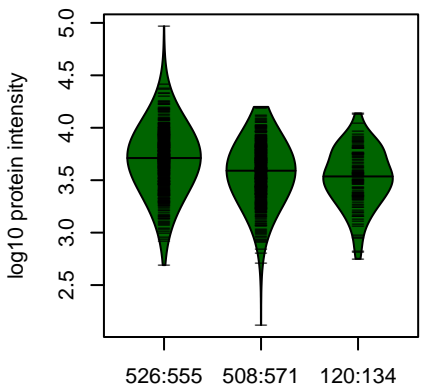

9:136149229:T:C\_C  
 $p = 6.4e-17$ ,  $\beta = -0.366$ ,  $N = 1154$

**VVFNTLQGGK pc2**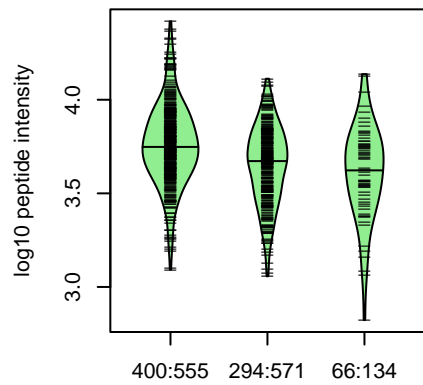

9:136149229:T:C\_C  
 $p = 3.8e-12$ ,  $\beta = -0.38$ ,  $N = 760$

**VGSSGDIALHINPR pc3**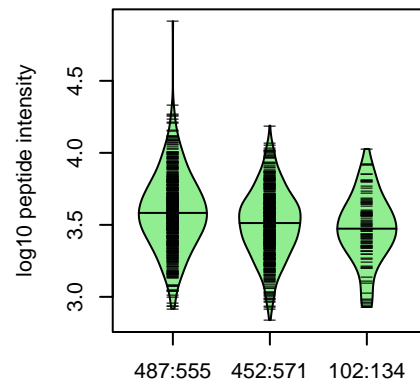

9:136149229:T:C\_C  
 $p = 3.4e-08$ ,  $\beta = -0.258$ ,  $N = 1041$

**VYANGQLFDFFAHR pc3**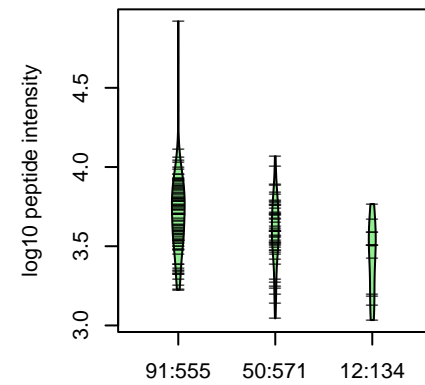

9:136149229:T:C\_C  
 $p = 4.7e-06$ ,  $\beta = -0.55$ ,  $N = 153$

**NSLLNGSWGSEEK pc2**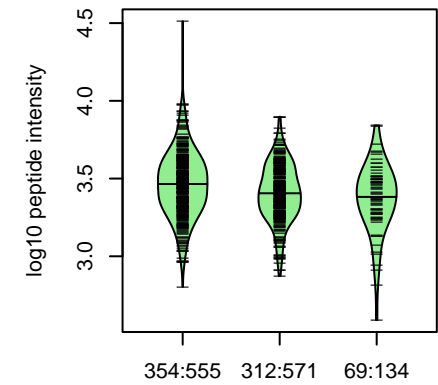

9:136149229:T:C\_C  
 $p = 0.00022$ ,  $\beta = -0.207$ ,  $N = 735$

**P56470 NP3**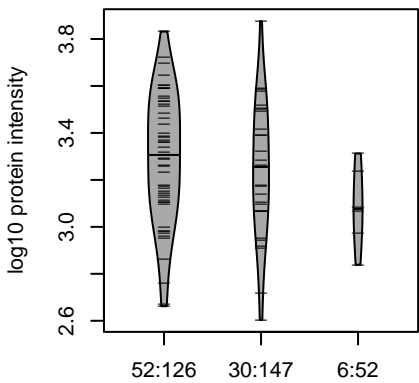

rs505922  
 $p = 0.051$ ,  $\beta = -0.32$ ,  $N = 88$

**VGSSGDIALHINPR pc3**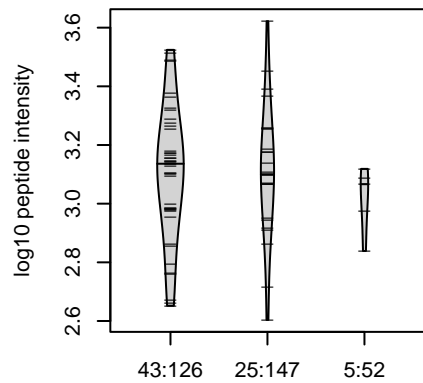

rs505922  
 $p = 0.3$ ,  $\beta = -0.187$ ,  $N = 73$

**VVFNTLQGGK pc2**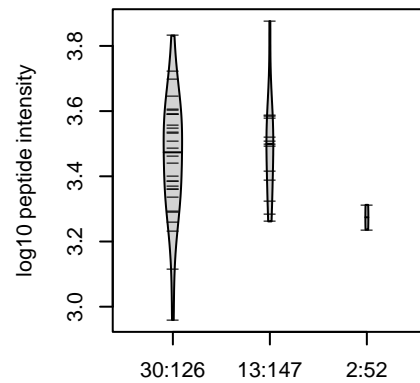

rs505922  
 $p = 0.7$ ,  $\beta = -0.0978$ ,  $N = 45$

Locus: 116 (Sort: 135)  
 Status: Not replicated  
 80% power: No  
 SNP: 9:136149229:T:C  
 rsID: rs505922  
 UniProtID: P56470  
 HGNC gene: LGALS4  
 Type: Trans-pQTL

**CD34 [trans]**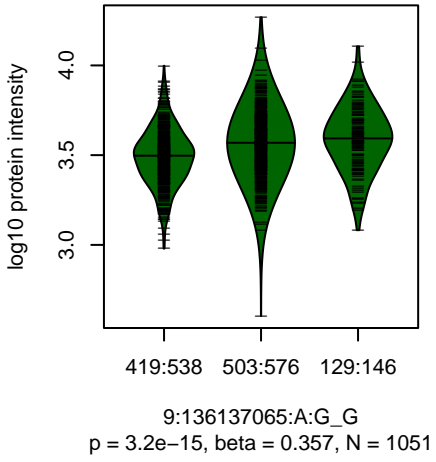**TSSCAEFK pc2**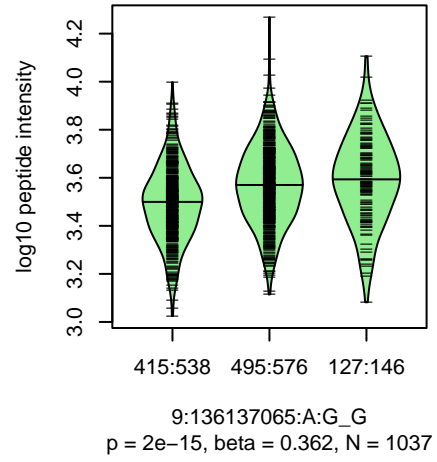**QHVVADTEL pc2**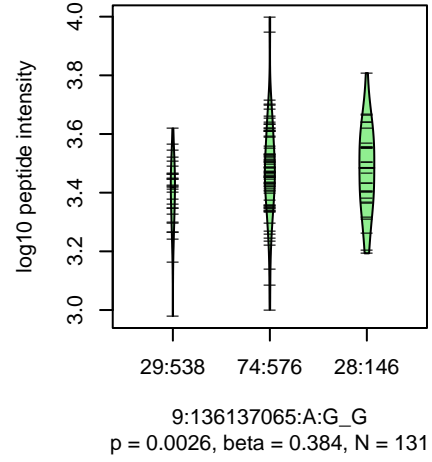**P28906 NP2**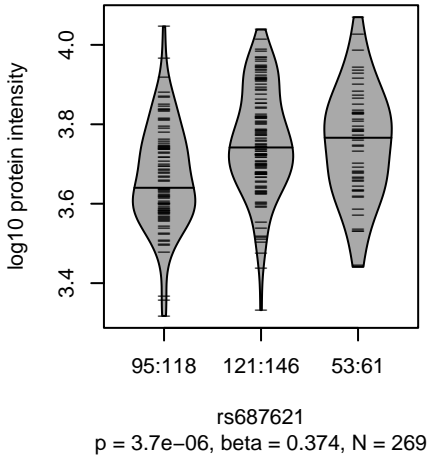**TSSCAEFK pc2**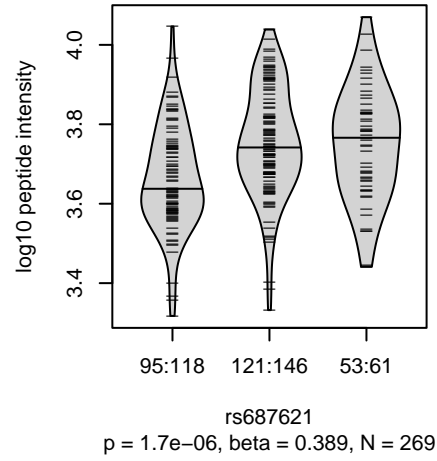

Locus: 116 (Sort: 136)

Status: Replicated

80% power: No

SNP: 9:136137065:A:G

rsID: rs687621

UniProtID: P28906

HGNC gene: CD34

Type: Trans-pQTL

**LTBP3 [cis]**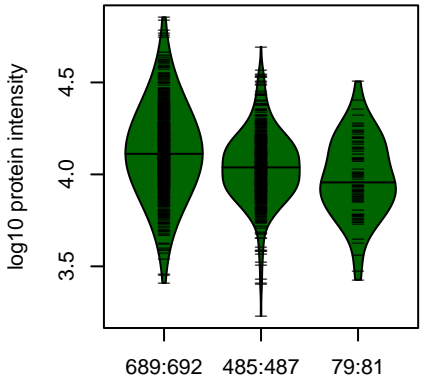

11:65322548:C:T\_T  
 $p = 6.9e-17$ ,  $\beta = -0.378$ ,  $N = 1253$

**DCQLPESPAER pc2**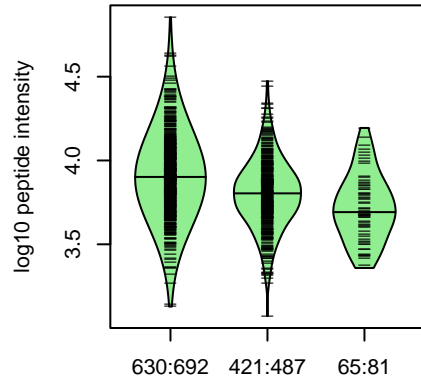

11:65322548:C:T\_T  
 $p = 9.6e-21$ ,  $\beta = -0.451$ ,  $N = 1116$

**GYTQDNNIVNYGIPAHR pc3**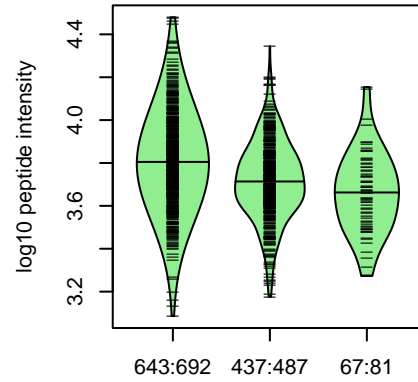

11:65322548:C:T\_T  
 $p = 1.8e-17$ ,  $\beta = -0.407$ ,  $N = 1147$

**SCVDLNECAK pc2**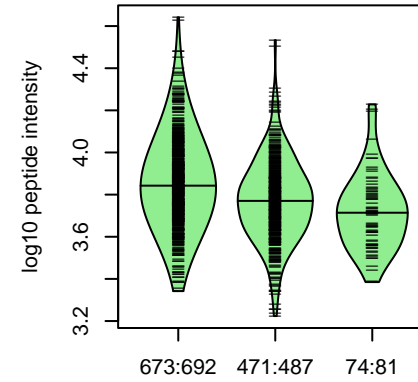

11:65322548:C:T\_T  
 $p = 1.9e-17$ ,  $\beta = -0.392$ ,  $N = 1218$

**CIACQPGYR pc2**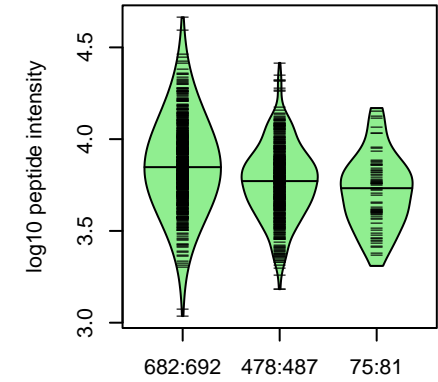

11:65322548:C:T\_T  
 $p = 3.8e-17$ ,  $\beta = -0.386$ ,  $N = 1235$

**Q9NS15 NP5**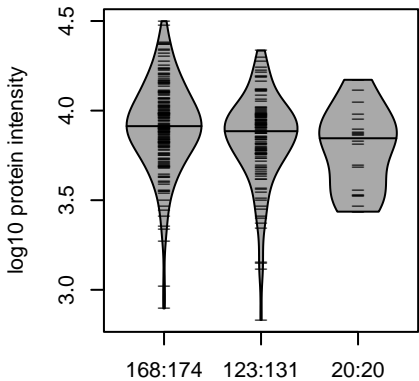

rs12270054  
 $p = 0.003$ ,  $\beta = -0.269$ ,  $N = 311$

**CIACQPGYR pc2**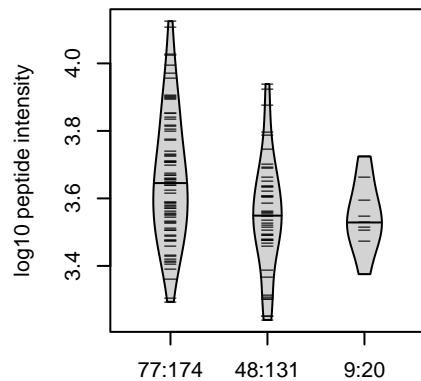

rs12270054  
 $p = 0.0042$ ,  $\beta = -0.384$ ,  $N = 134$

**VVFAPVICK pc2**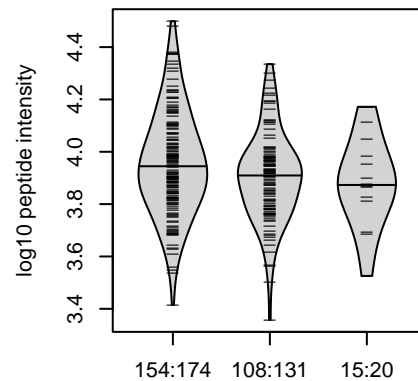

rs12270054  
 $p = 0.014$ ,  $\beta = -0.241$ ,  $N = 277$

**GYTQDNNIVNYGIPAHR pc3**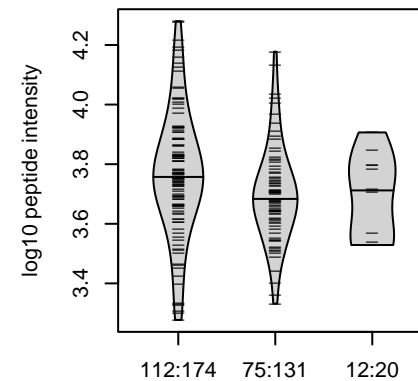

rs12270054  
 $p = 0.014$ ,  $\beta = -0.278$ ,  $N = 199$

**LVSPEHCQHQHPLTTR pc4**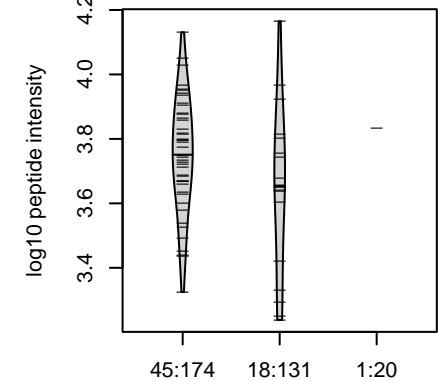

rs12270054  
 $p = 0.032$ ,  $\beta = -0.511$ ,  $N = 64$

Locus: 117 (Sort: 137)  
 Status: Not replicated  
 80% power: No  
 SNP: 11:65322548:C:T  
 rsID: rs12270054  
 UniProtID: Q9NS15  
 HGNC gene: LTBP3  
 Type: Cis-pQTL



**ICAM1 [trans]**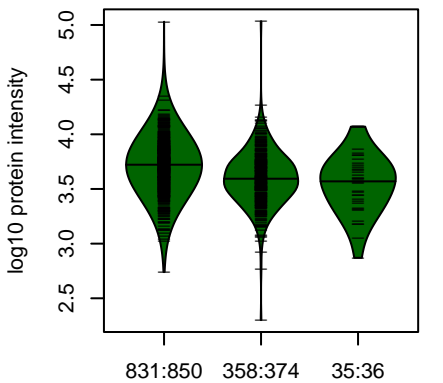

9:136149399:G:A\_A  
 $p = 1.3e-16$ ,  $\beta = -0.436$ ,  $N = 1224$

**LLGIETPLPK pc2**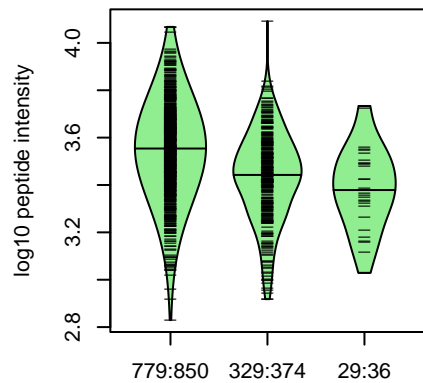

9:136149399:G:A\_A  
 $p = 3.3e-21$ ,  $\beta = -0.522$ ,  $N = 1137$

**VTLNGVPAQPLGPR pc2**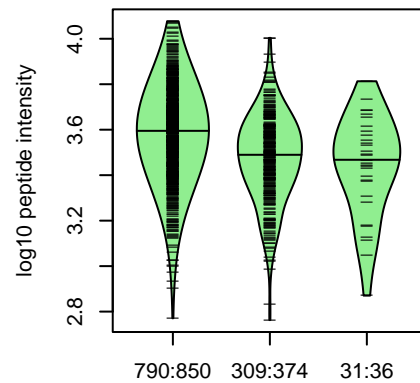

9:136149399:G:A\_A  
 $p = 1.4e-16$ ,  $\beta = -0.46$ ,  $N = 1130$

**GGSVLVTCTSCDQPK pc2**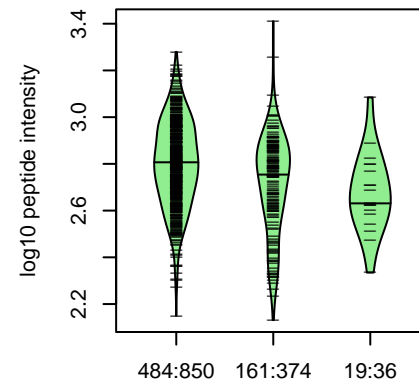

9:136149399:G:A\_A  
 $p = 1.2e-07$ ,  $\beta = -0.39$ ,  $N = 664$

**REPAVGEPAEVTTTTLVLR pc3**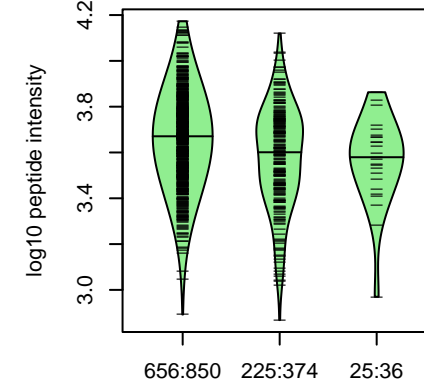

9:136149399:G:A\_A  
 $p = 3.2e-07$ ,  $\beta = -0.325$ ,  $N = 906$

**P05362 NP4**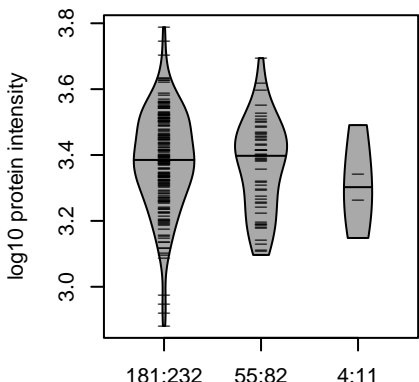

rs507666  
 $p = 0.19$ ,  $\beta = -0.17$ ,  $N = 240$

**VTLNGVPAQPLGPR pc2**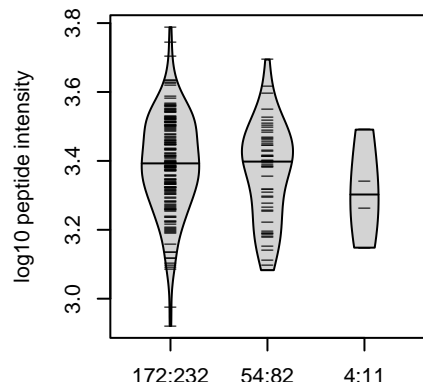

rs507666  
 $p = 0.093$ ,  $\beta = -0.226$ ,  $N = 230$

**LLGIETPLPK pc2**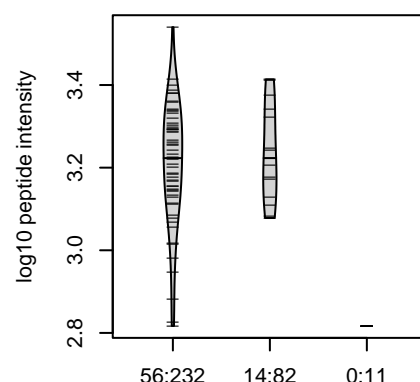

rs507666  
 $p = 0.46$ ,  $\beta = 0.213$ ,  $N = 70$

Locus: 118 (Sort: 138)

Status: Not replicated

80% power: No

SNP: 9:136149399:G:A

rsID: rs507666

UniProtID: P05362

HGNC gene: ICAM1

Type: Trans-pQTL

**GPR116 [trans]**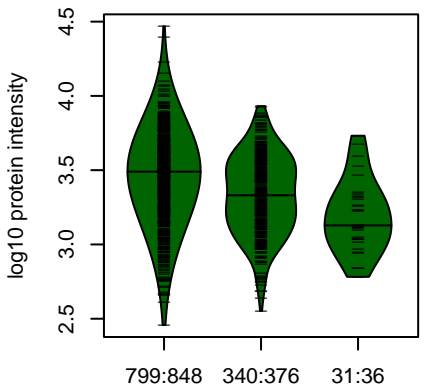

9:136155000:C:T\_T  
 $p = 1.3e-15$ ,  $\beta = -0.435$ ,  $N = 1170$

**DVIVHPLPLK pc2**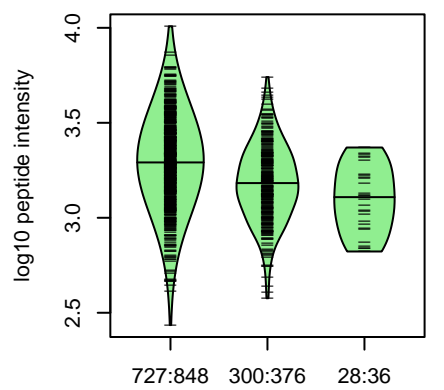

9:136155000:C:T\_T  
 $p = 6.4e-16$ ,  $\beta = -0.464$ ,  $N = 1055$

**LNIMVDPLEATVSCSGSHHIK pc4**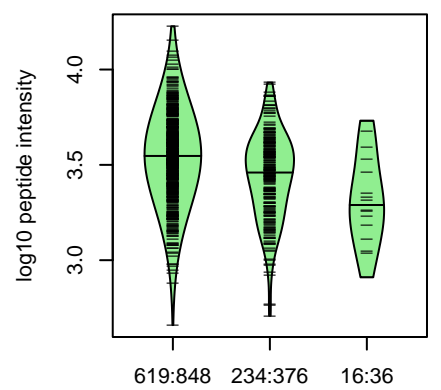

9:136155000:C:T\_T  
 $p = 7.6e-10$ ,  $\beta = -0.411$ ,  $N = 869$

**LILDIFEYECK pc2**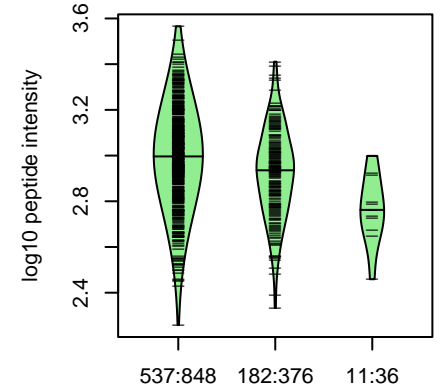

9:136155000:C:T\_T  
 $p = 1.4e-06$ ,  $\beta = -0.366$ ,  $N = 730$

**CCIEEDGDYK pc2**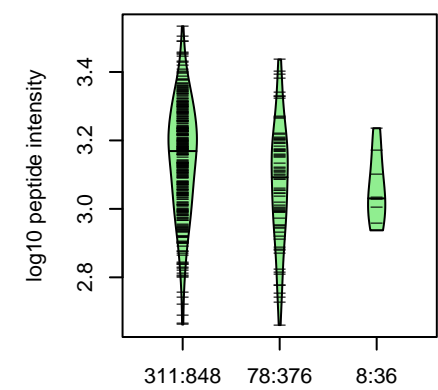

9:136155000:C:T\_T  
 $p = 0.00033$ ,  $\beta = -0.376$ ,  $N = 397$

**Q8IZF2 NP2**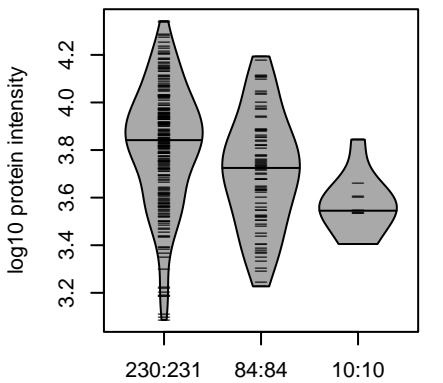

rs635634  
 $p = 1.5e-05$ ,  $\beta = -0.447$ ,  $N = 324$

**DVIVHPLPLK pc2**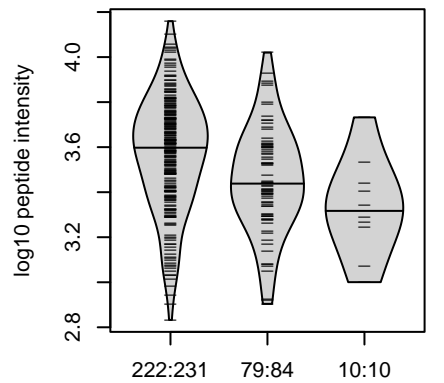

rs635634  
 $p = 4.3e-05$ ,  $\beta = -0.427$ ,  $N = 311$

**LNIMVDPLEATVSCSGSHHIK pc4**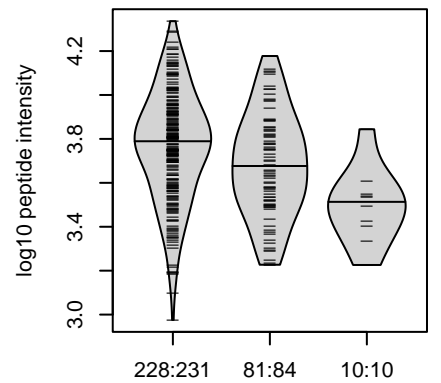

rs635634  
 $p = 0.00015$ ,  $\beta = -0.393$ ,  $N = 319$

**LILDIFEYECK pc2**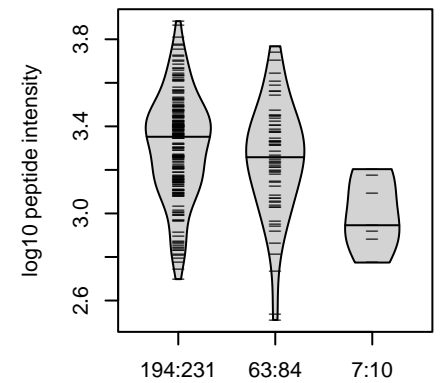

rs635634  
 $p = 0.0028$ ,  $\beta = -0.353$ ,  $N = 264$

**CVGSQWEEK pc2**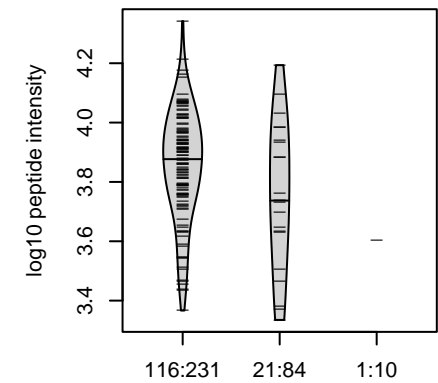

rs635634  
 $p = 0.021$ ,  $\beta = -0.485$ ,  $N = 138$

**VTFHMGSSSLPAAK pc3  
rs586024 ALT**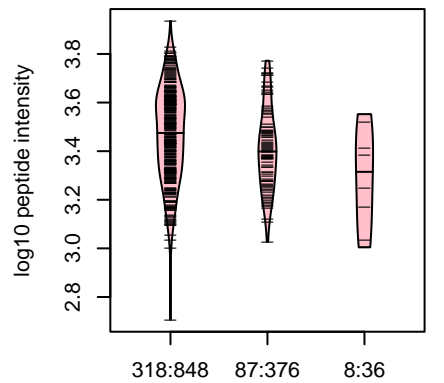

9:136155000:C:T\_T  
 $p = 2.1e-07$ ,  $\text{model} = \text{REC}$ ,  $N = 413$

Locus: 118 (Sort: 139)  
 Status: Replicated  
 80% power: No  
 SNP: 9:136155000:C:T  
 rsID: rs635634  
 UniProtID: Q8IZF2  
 HGNC gene: GPR116  
 Type: Trans-pQTL

**CDH19 [cis]**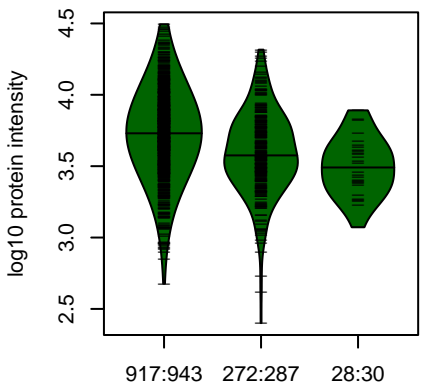

18:64116504:G:C\_C  
 $p = 1.6e-16$ ,  $\beta = -0.471$ ,  $N = 1217$

**MDRELQDEYWIIQAK pc3**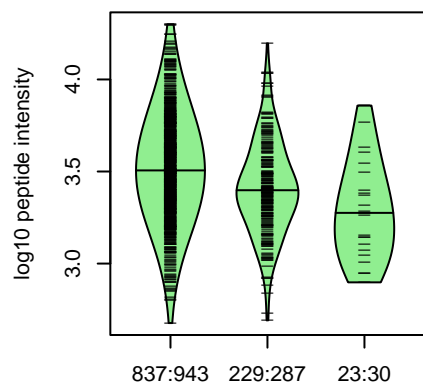

18:64116504:G:C\_C  
 $p = 5.3e-11$ ,  $\beta = -0.408$ ,  $N = 1089$

**VSDINDNEPK pc2**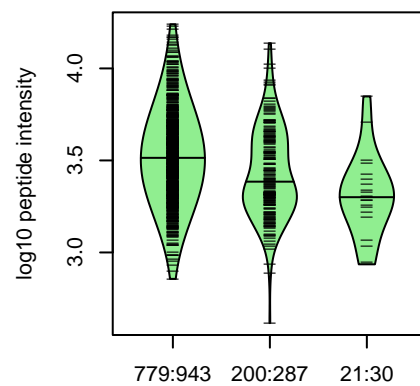

18:64116504:G:C\_C  
 $p = 7.1e-10$ ,  $\beta = -0.405$ ,  $N = 1000$

**TGDIYAIQK pc2**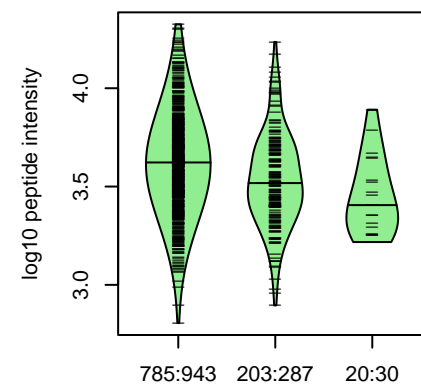

18:64116504:G:C\_C  
 $p = 5.8e-09$ ,  $\beta = -0.384$ ,  $N = 1008$

**LLGAGAGSTFIIDER pc2**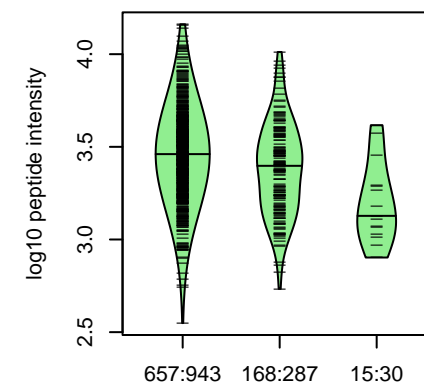

18:64116504:G:C\_C  
 $p = 1.1e-07$ ,  $\beta = -0.388$ ,  $N = 840$

**Q9H159 NP2**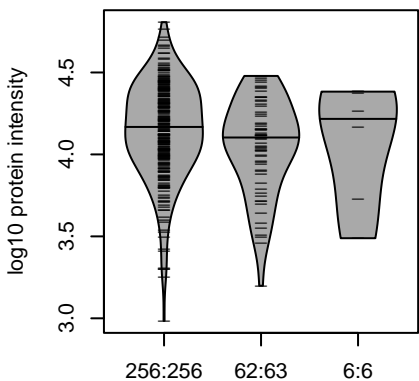

rs985088  
 $p = 0.042$ ,  $\beta = -0.243$ ,  $N = 324$

**LLGAGAGSTFIIDER pc2**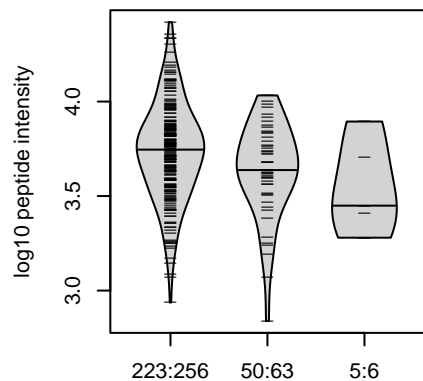

rs985088  
 $p = 0.012$ ,  $\beta = -0.326$ ,  $N = 278$

**VSDINDNEPK pc2**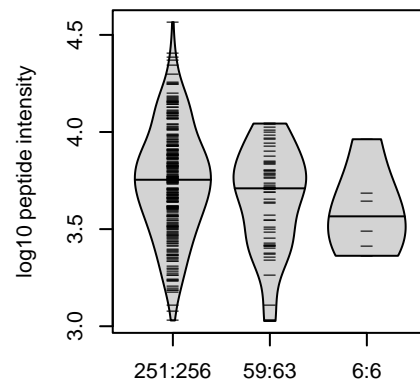

rs985088  
 $p = 0.016$ ,  $\beta = -0.29$ ,  $N = 316$

**LSDVNDNKPIFK pc3**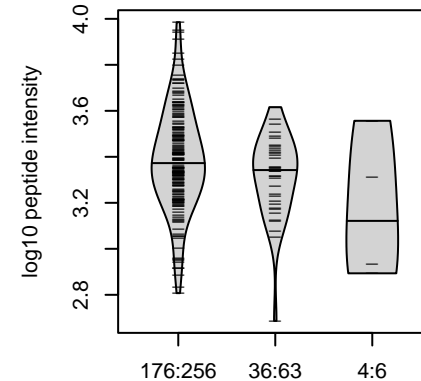

rs985088  
 $p = 0.018$ ,  $\beta = -0.351$ ,  $N = 216$

**AVEPESEFVIK pc2**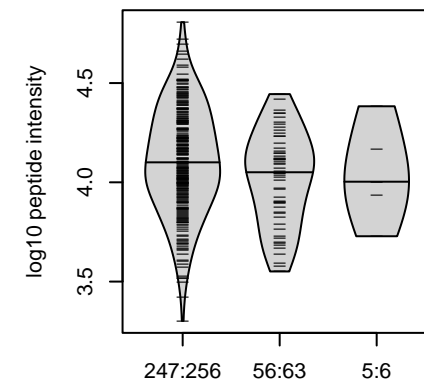

rs985088  
 $p = 0.051$ ,  $\beta = -0.244$ ,  $N = 308$

Locus: 119 (Sort: 140)  
 Status: Not replicated  
 80% power: No  
 SNP: 18:64116504:G:C  
 rsID: rs985088  
 UniProtID: Q9H159  
 HGNC gene: CDH19  
 Type: Cis-pQTL

**IGHV2-70 [cis]**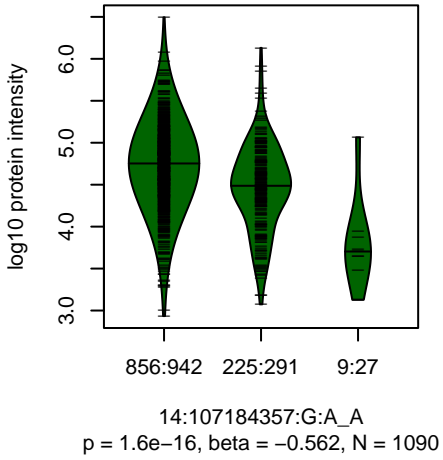**ALEWLAR pc2**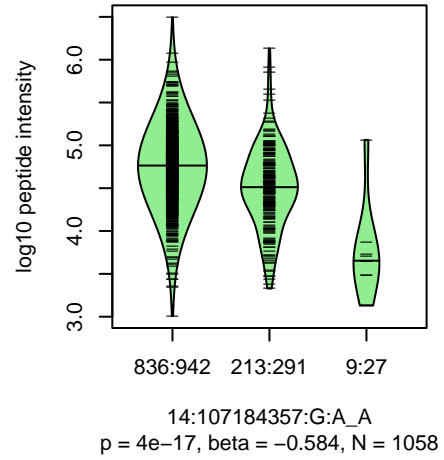**FYSTSLK pc2**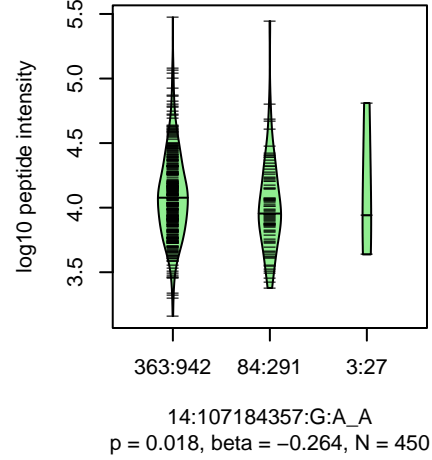**IDWDDDK pc2**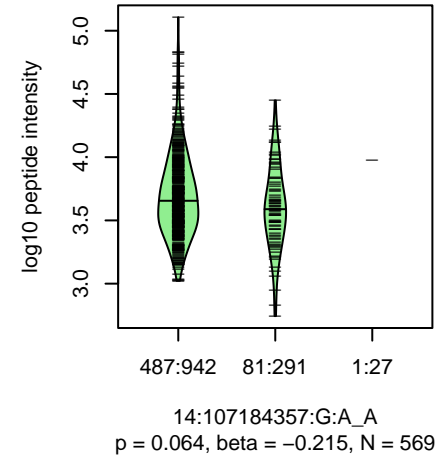**ESGPALVK pc2**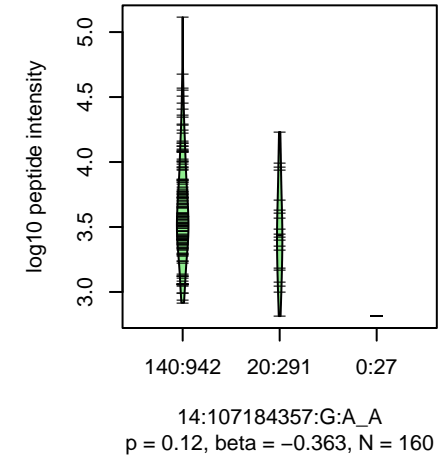**A0A0C4DH43 NP3**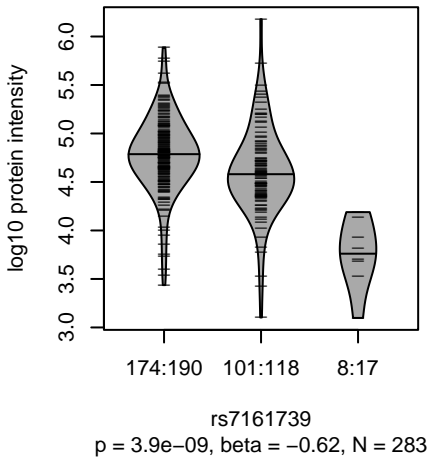**ALEWLAR pc2**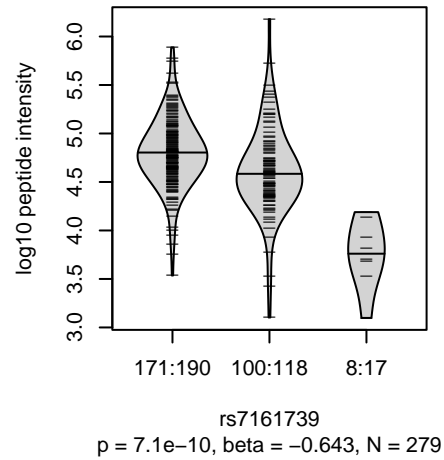**FYSTSLK pc2**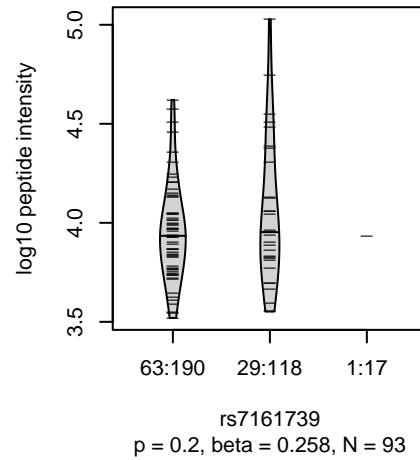**ESGPALVK pc2**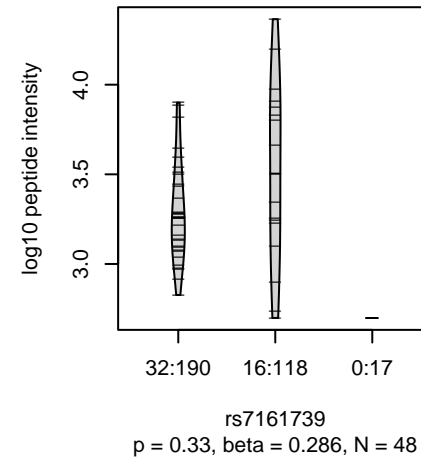**IDWDDDK pc2**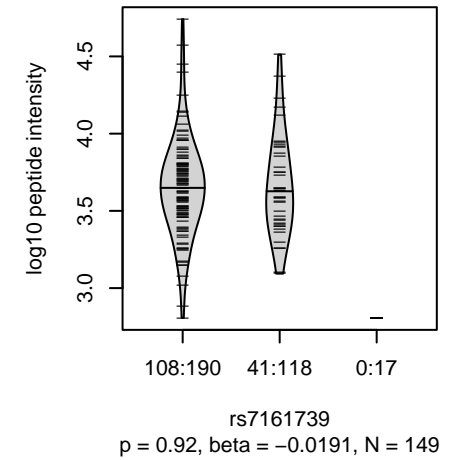

Locus: 120 (Sort: 141)

Status: Replicated

80% power: No

SNP: 14:107184357:G:A

rsID: rs7161739

UniProtID: A0A0C4DH43

HGNC gene: IGHV2-70

Type: Cis-pQTL

**MBL2 [cis]**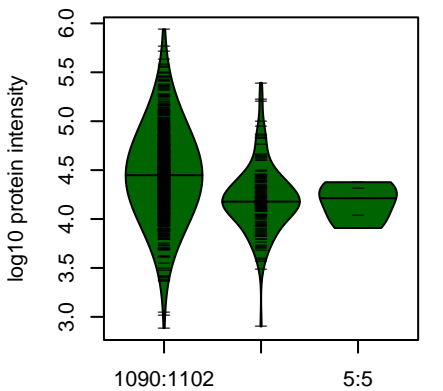

10:54600666:A:C\_C  
 $p = 2.5e-16$ ,  $\beta = -0.654$ ,  $N = 1248$

**FQASVATPR pc2**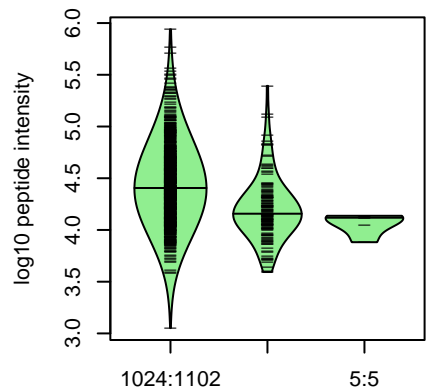

10:54600666:A:C\_C  
 $p = 1.3e-16$ ,  $\beta = -0.694$ ,  $N = 1164$

**FFLTNGEIMTFEK pc2**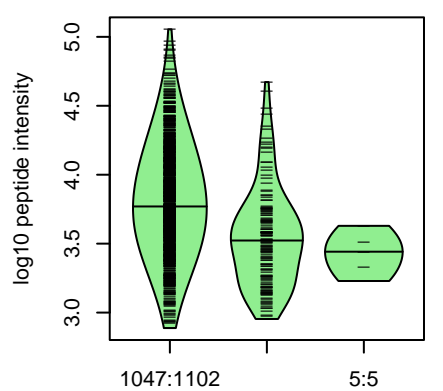

10:54600666:A:C\_C  
 $p = 2.9e-16$ ,  $\beta = -0.672$ ,  $N = 1194$

**WLTFSLGK pc2**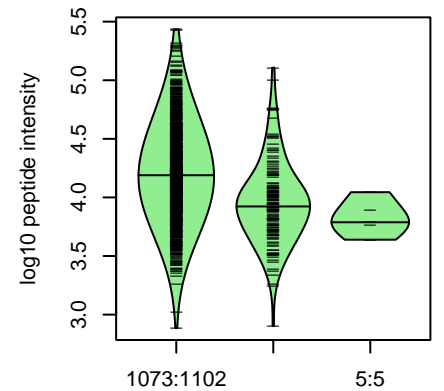

10:54600666:A:C\_C  
 $p = 7.6e-16$ ,  $\beta = -0.657$ ,  $N = 1223$

**TEGQFVDLTGNR pc2**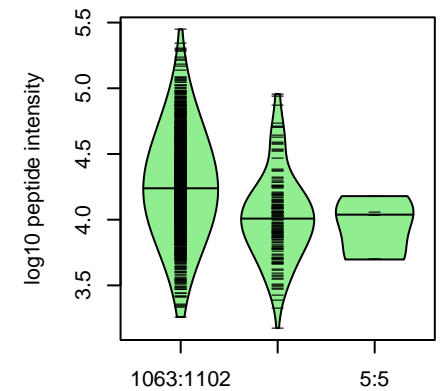

10:54600666:A:C\_C  
 $p = 3.1e-15$ ,  $\beta = -0.645$ ,  $N = 1212$

**P11226 NP2**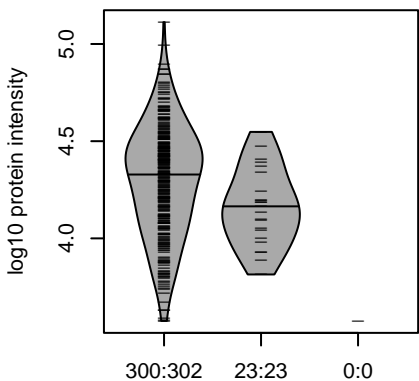

rs11003205  
 $p = 0.021$ ,  $\beta = -0.492$ ,  $N = 323$

**FQASVATPR pc2**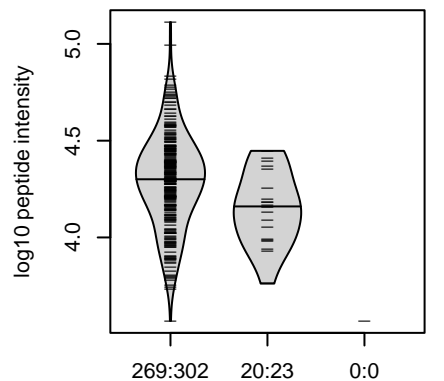

rs11003205  
 $p = 0.0099$ ,  $\beta = -0.587$ ,  $N = 289$

**NAAENGAIQNLIK pc2**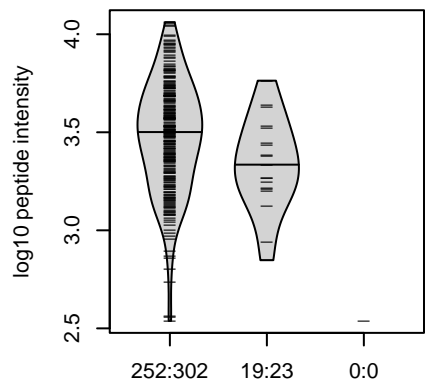

rs11003205  
 $p = 0.033$ ,  $\beta = -0.5$ ,  $N = 271$

**WLTFSLGK pc2**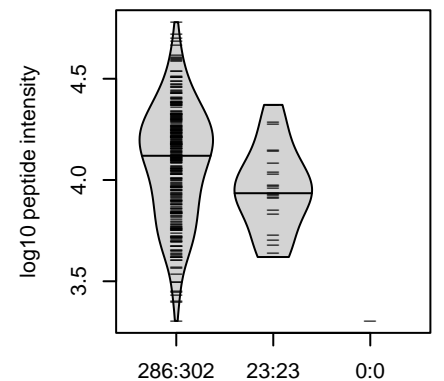

rs11003205  
 $p = 0.033$ ,  $\beta = -0.455$ ,  $N = 309$

**FFLTNGEIMTFEK pc2**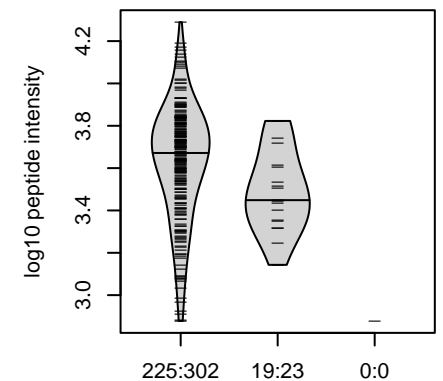

rs11003205  
 $p = 0.039$ ,  $\beta = -0.484$ ,  $N = 244$

Locus: 121 (Sort: 142)

Status: Not replicated

80% power: No

SNP: 10:54600666:A:C

rsID: rs11003205

UniProtID: P11226

HGNC gene: MBL2

Type: Cis-pQTL

**FN3K [cis]**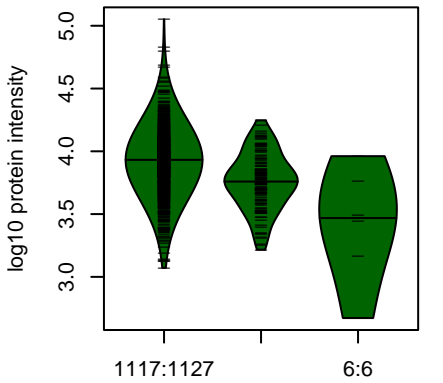

17:80777358:T:A\_A  
 $p = 2.6e-16$ ,  $\beta = -0.706$ ,  $N = 1243$

**VIDLPGGGAAFVMEHLK pc3**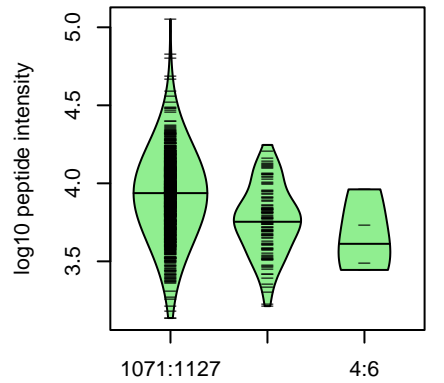

17:80777358:T:A\_A  
 $p = 2.5e-13$ ,  $\beta = -0.674$ ,  $N = 1185$

**AYDTDAGPVFVK pc2**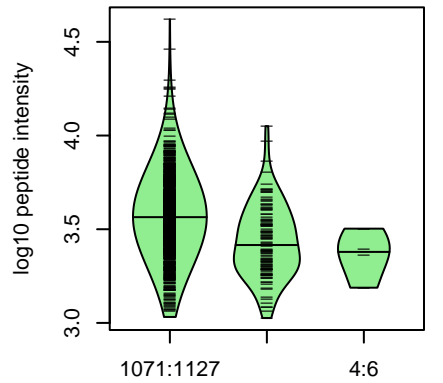

17:80777358:T:A\_A  
 $p = 1.4e-12$ ,  $\beta = -0.658$ ,  $N = 1183$

**QMFEGEVASLEALR pc2**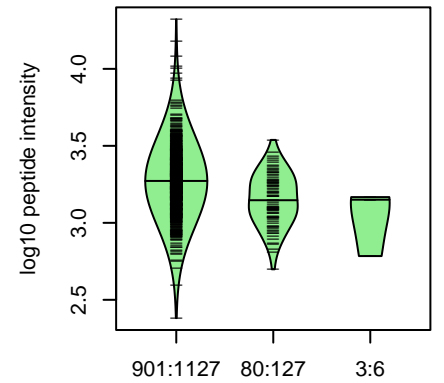

17:80777358:T:A\_A  
 $p = 2.3e-09$ ,  $\beta = -0.641$ ,  $N = 984$

**LQAQLDLIEK pc2**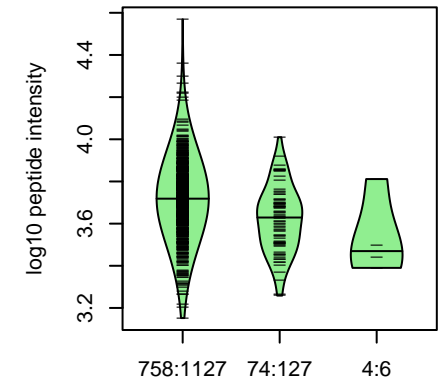

17:80777358:T:A\_A  
 $p = 8.4e-08$ ,  $\beta = -0.584$ ,  $N = 836$

**Q9H479 NP1**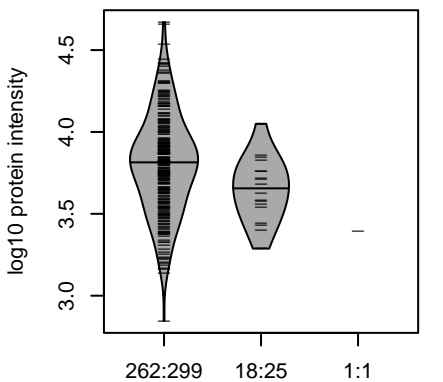

rs117095480  
 $p = 0.025$ ,  $\beta = -0.488$ ,  $N = 281$

**VIDLPGGGAAFVMEHLK pc3**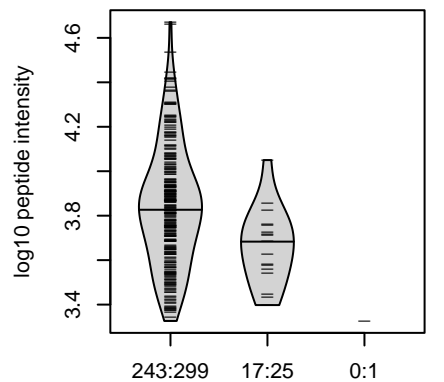

rs117095480  
 $p = 0.03$ ,  $\beta = -0.536$ ,  $N = 260$

**AYDTDAGPVFVK pc2**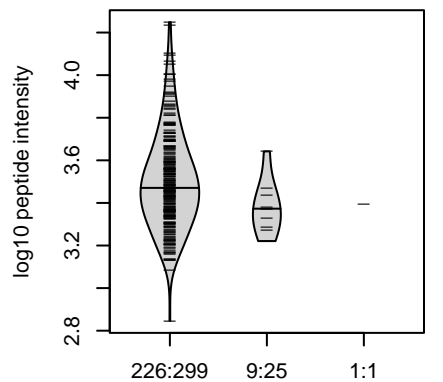

rs117095480  
 $p = 0.14$ ,  $\beta = -0.407$ ,  $N = 236$

**LGEQMADLHLYNQK pc3**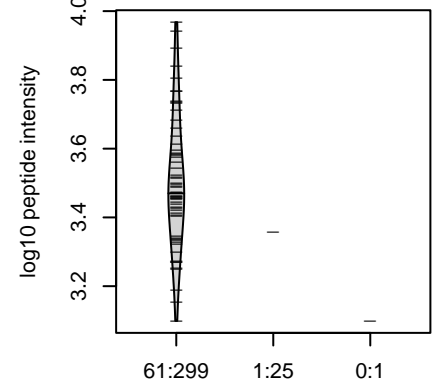

rs117095480  
 $p = 0.59$ ,  $\beta = -0.528$ ,  $N = 62$

**SPSLGTMR pc2**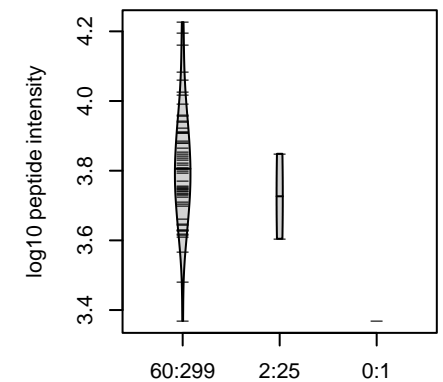

rs117095480  
 $p = 0.81$ ,  $\beta = -0.167$ ,  $N = 62$

Locus: 122 (Sort: 143)

Status: Not replicated

80% power: No

SNP: 17:80777358:T:A

rsID: rs117095480

UniProtID: Q9H479

HGNC gene: FN3K

Type: Cis-pQTL

**SAA1 [cis]**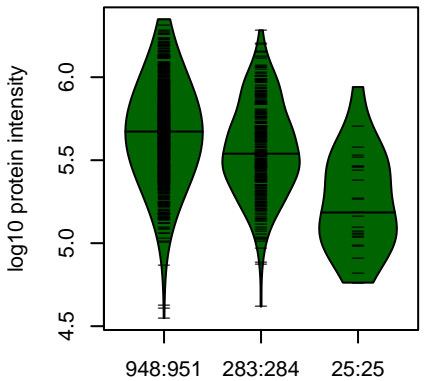

11:18278423:A:C\_C  
 $p = 4.7e-16$ ,  $\beta = -0.465$ ,  $N = 1256$

**DPNHFRPAGLPEK pc3**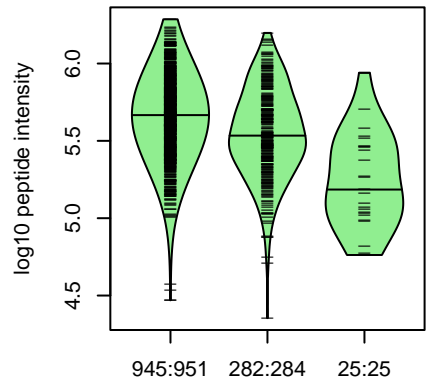

11:18278423:A:C\_C  
 $p = 1.1e-15$ ,  $\beta = -0.46$ ,  $N = 1252$

**FFGHGAEDSLADQAANEWGR pc3**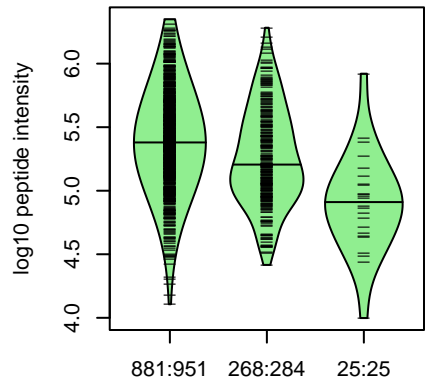

11:18278423:A:C\_C  
 $p = 1.8e-11$ ,  $\beta = -0.395$ ,  $N = 1174$

**SFFSFLGEAFDGR pc2**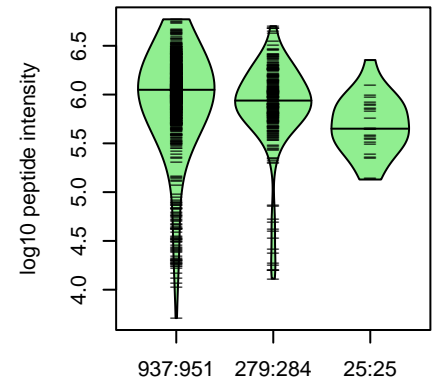

11:18278423:A:C\_C  
 $p = 1.9e-07$ ,  $\beta = -0.302$ ,  $N = 1241$

**EANYIGSDK pc2**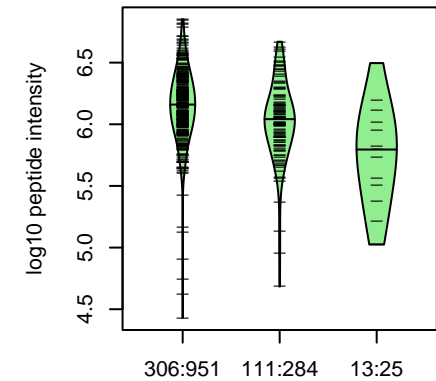

11:18278423:A:C\_C  
 $p = 5.8e-06$ ,  $\beta = -0.406$ ,  $N = 430$

**E9PQD6 NP2**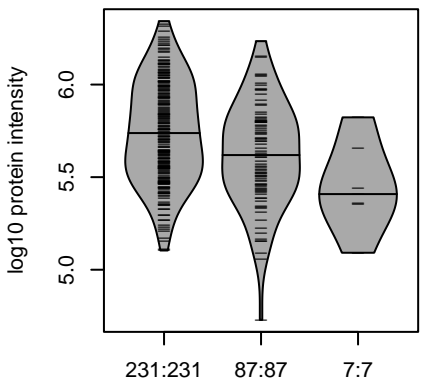

rs11024589  
 $p = 1.5e-07$ ,  $\beta = -0.562$ ,  $N = 325$

**SFFSFLGEAFDGR pc2**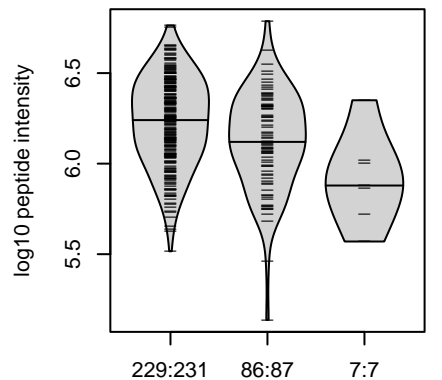

rs11024589  
 $p = 8.1e-08$ ,  $\beta = -0.569$ ,  $N = 322$

**DPNHFRPAGLPEK pc3**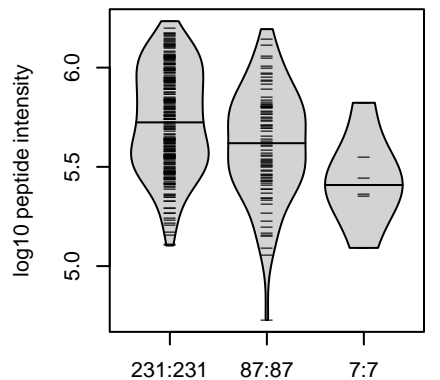

rs11024589  
 $p = 1e-07$ ,  $\beta = -0.563$ ,  $N = 325$

**EANYIGSDK pc2**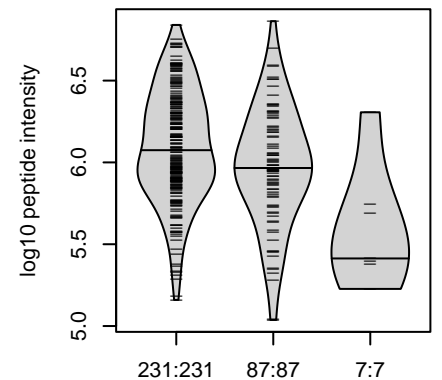

rs11024589  
 $p = 1.8e-06$ ,  $\beta = -0.508$ ,  $N = 325$

**FFGHGAEDSLADQAANEWGR pc3**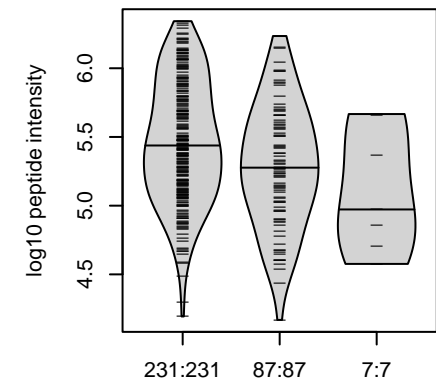

rs11024589  
 $p = 8e-06$ ,  $\beta = -0.475$ ,  $N = 325$

Locus: 123 (Sort: 144)

Status: Replicated

80% power: No

SNP: 11:18278423:A:C

rsID: rs11024589

UniProtID: E9PQD6

HGNC gene: SAA1

Type: Cis-pQTL

**MBL2 [cis]**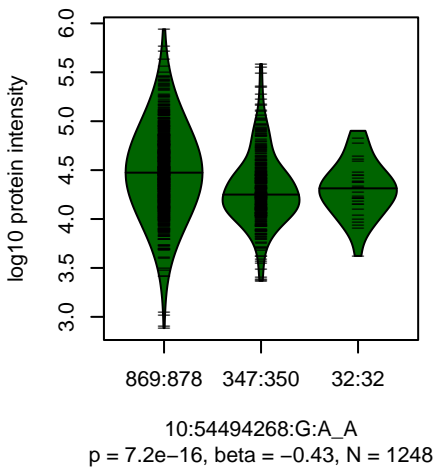**TEGQFVDLTG NR pc2**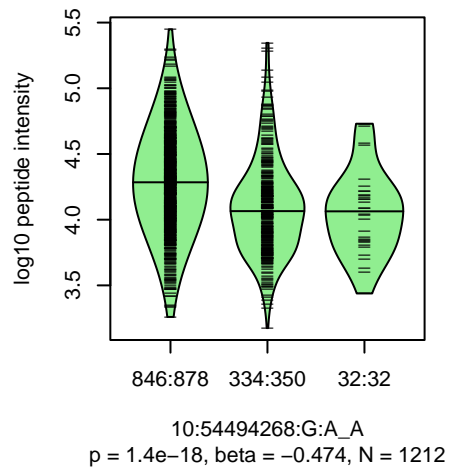**FFLTNGEIMTFEK pc2**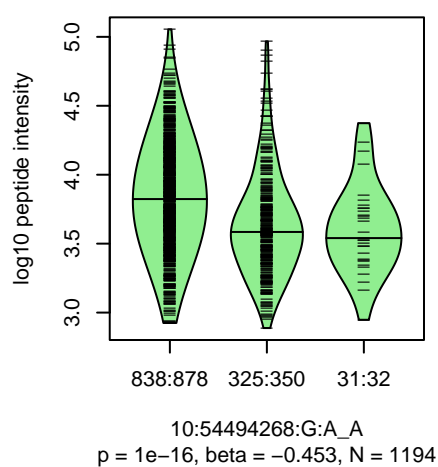**WLTFSLGK pc2**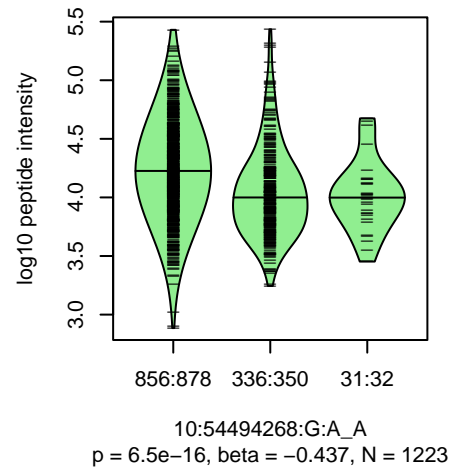**FQASVATPR pc2**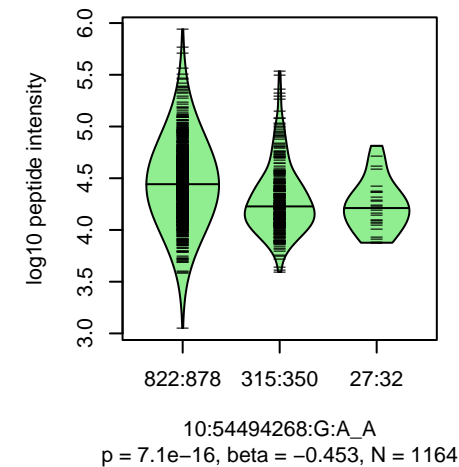**P11226 NP2**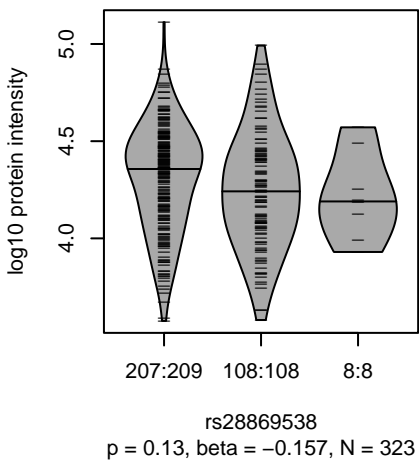**FQASVATPR pc2**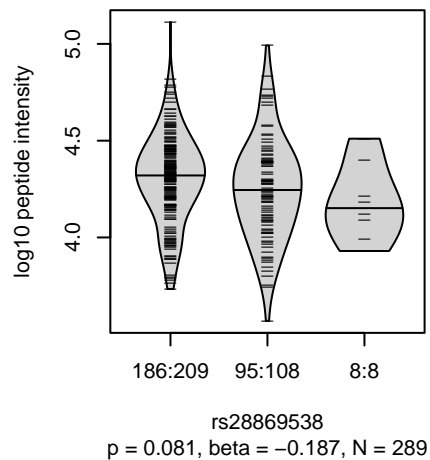**WLTFSLGK pc2**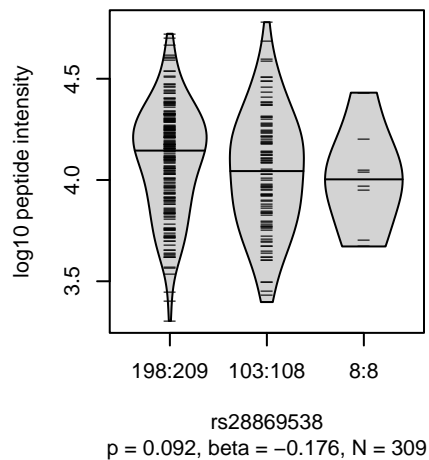**NAAENGAIQNLIK pc2**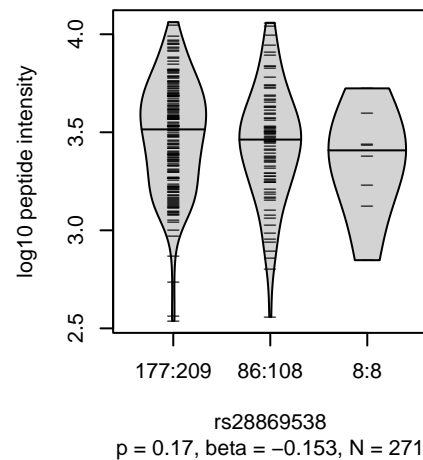**EEAFLGITDEK pc2**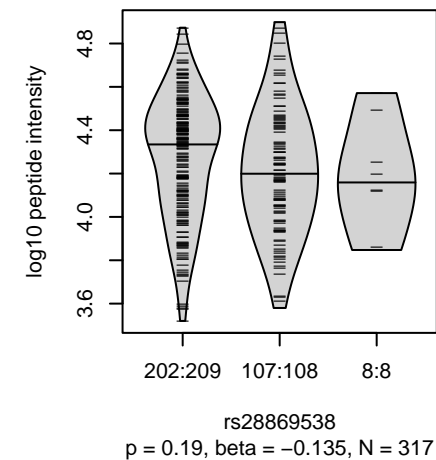

Locus: 124 (Sort: 145)

Status: Not replicated

80% power: No

SNP: 10:54494268:G:A

rsID: rs28869538

UniProtID: P11226

HGNC gene: MBL2

Type: Cis-pQTL



**C1RL [trans]**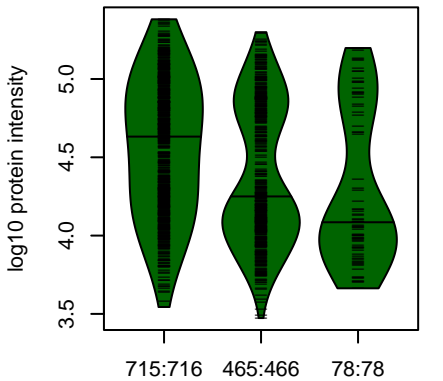

11:57381263:T:C\_C  
 $p = 9.4e-16$ ,  $\beta = -0.364$ ,  $N = 1258$

**LGTFPWQAFTSIHGR pc3**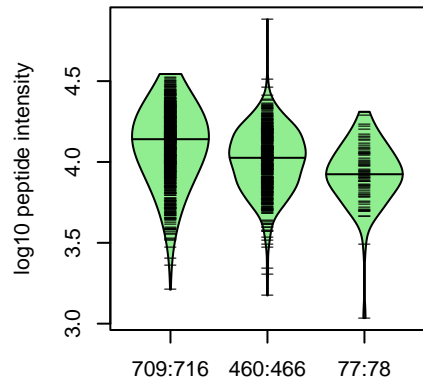

11:57381263:T:C\_C  
 $p = 1.7e-22$ ,  $\beta = -0.442$ ,  $N = 1246$

**GSEAINAPGDNPAK pc2**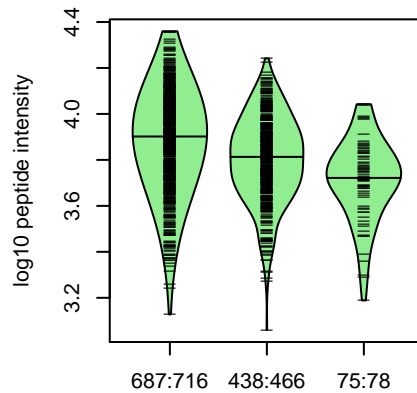

11:57381263:T:C\_C  
 $p = 4.8e-19$ ,  $\beta = -0.412$ ,  $N = 1200$

**APEGFAVR pc2**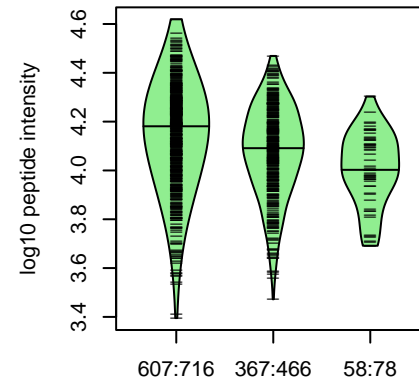

11:57381263:T:C\_C  
 $p = 8.1e-13$ ,  $\beta = -0.364$ ,  $N = 1032$

**EACNAWLQK pc2**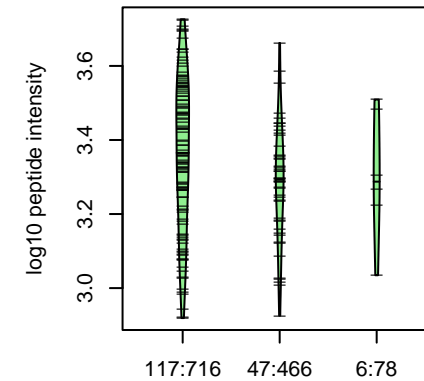

11:57381263:T:C\_C  
 $p = 0.12$ ,  $\beta = -0.214$ ,  $N = 170$

**Q9NZP8 NP4**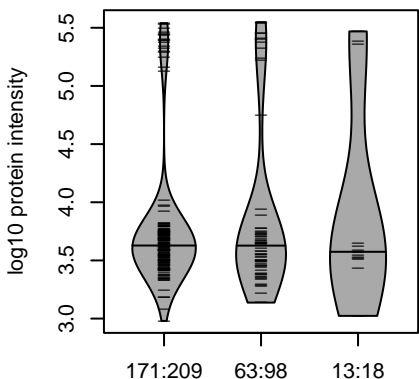

rs10896631  
 $p = 0.65$ ,  $\beta = -0.0487$ ,  $N = 247$

**LGTFPWQAFTSIHGR pc3**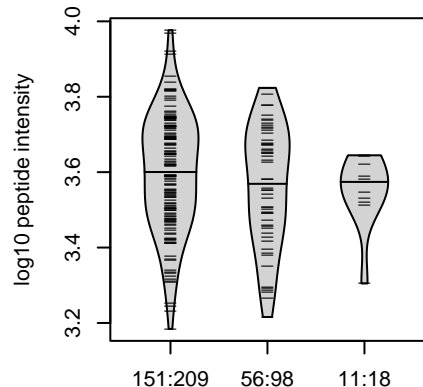

rs10896631  
 $p = 0.051$ ,  $\beta = -0.225$ ,  $N = 218$

**GSEAINAPGDNPAK pc2**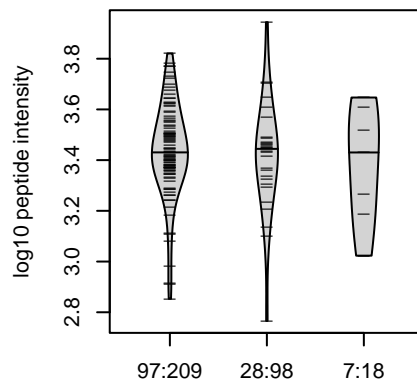

rs10896631  
 $p = 0.25$ ,  $\beta = -0.174$ ,  $N = 132$

**VVVHPDYR pc2**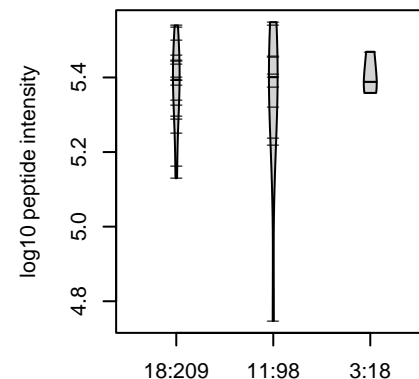

rs10896631  
 $p = 0.56$ ,  $\beta = -0.148$ ,  $N = 32$

**GGGALLGDR pc2**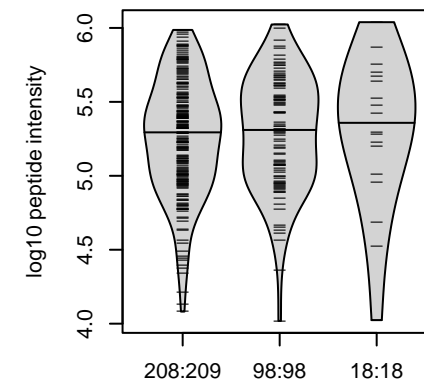

rs10896631  
 $p = 0.6$ ,  $\beta = 0.0479$ ,  $N = 324$

Locus: 125 (Sort: 146)  
 Status: Not replicated  
 80% power: No  
 SNP: 11:57381263:T:C  
 rsID: rs10896631  
 UniProtID: Q9NZP8  
 HGNC gene: C1RL  
 Type: Trans-pQTL

**WILTAHTVYPK pc2  
rs3742089 ALT**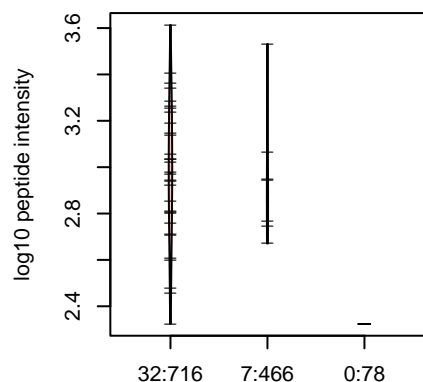

11:57381263:T:C\_C  
 $p = 0.00093$ ,  $\text{model} = \text{REC}$ ,  $N = 39$

**WILTAHTVYPK pc2  
rs3742089 REF**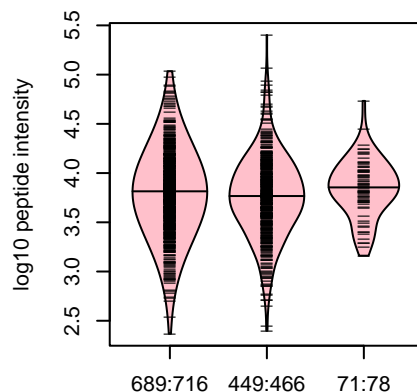

11:57381263:T:C\_C  
 $p = 0.034$ ,  $\text{model} = \text{DOM}$ ,  $N = 1209$

**GGGALLGDRWILTAHTVYPK pc3  
rs3742089 REF**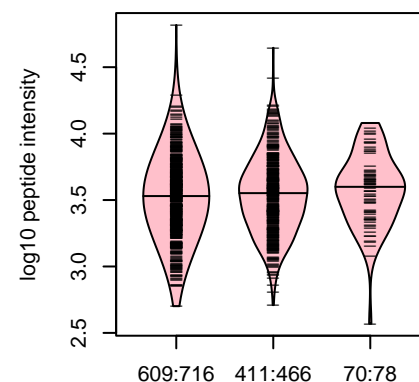

11:57381263:T:C\_C  
 $p = 0.096$ ,  $\text{model} = \text{REC}$ ,  $N = 1090$

**FAM177A1 [cis]**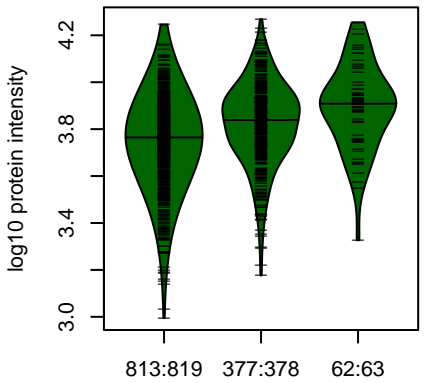

14:35485748:G:A\_G  
 $p = 9.7e-16$ ,  $\beta = 0.383$ ,  $N = 1252$

**YQYAIDEYYR pc2**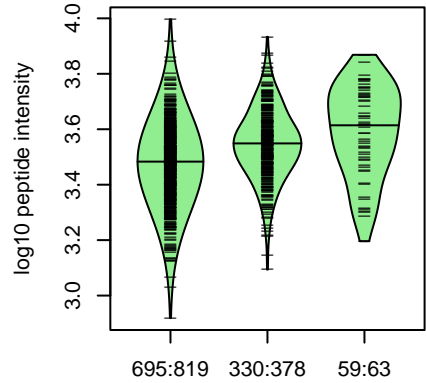

14:35485748:G:A\_G  
 $p = 7.2e-19$ ,  $\beta = 0.444$ ,  $N = 1084$

**IASVLGISTPK pc2**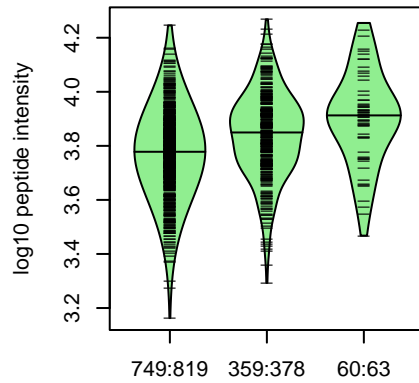

14:35485748:G:A\_G  
 $p = 3e-14$ ,  $\beta = 0.372$ ,  $N = 1168$

**AATSTLSVCDLGEK pc2**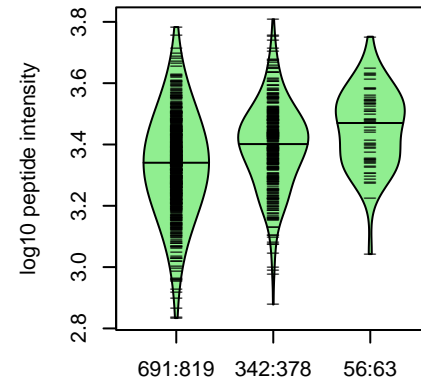

14:35485748:G:A\_G  
 $p = 4.2e-13$ ,  $\beta = 0.367$ ,  $N = 1089$

**GFENVELGVIGK pc2**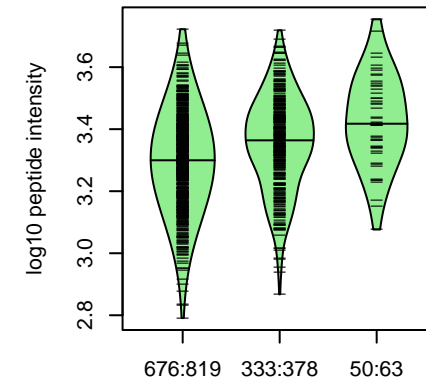

14:35485748:G:A\_G  
 $p = 3.9e-12$ ,  $\beta = 0.362$ ,  $N = 1059$

**Q8N128 NP2**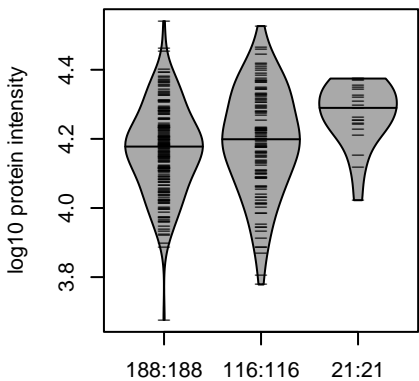

rs799459  
 $p = 6e-04$ ,  $\beta = 0.301$ ,  $N = 325$

**GFENVELGVIGK pc2**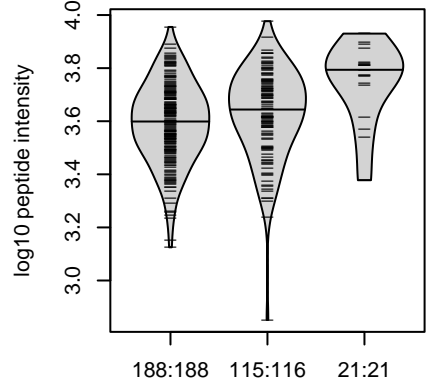

rs799459  
 $p = 0.00011$ ,  $\beta = 0.341$ ,  $N = 324$

**AATSTLSVCDLGEK pc2**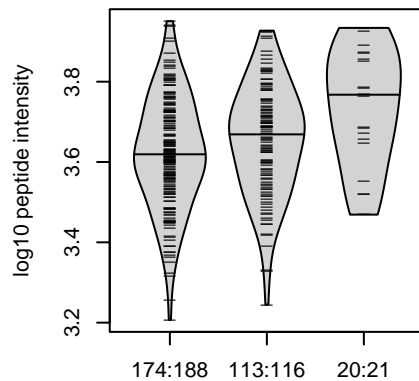

rs799459  
 $p = 0.00081$ ,  $\beta = 0.303$ ,  $N = 307$

**IASVLGISTPK pc2**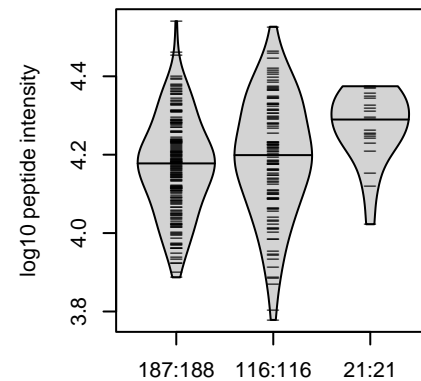

rs799459  
 $p = 0.00091$ ,  $\beta = 0.293$ ,  $N = 324$

**YQYAIDEYYR pc2**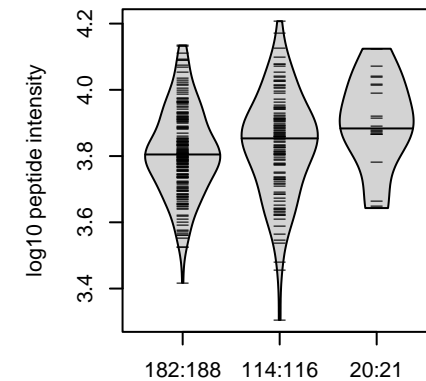

rs799459  
 $p = 0.011$ ,  $\beta = 0.23$ ,  $N = 316$

Locus: 126 (Sort: 147)

Status: Not replicated

80% power: No

SNP: 14:35485748:G:A

rsID: rs799459

UniProtID: Q8N128

HGNC gene: FAM177A1

Type: Cis-pQTL

**FCGR3A [cis]**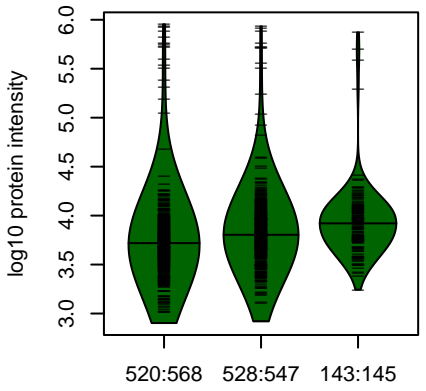

1:161588873:C:T\_T  
 $p = 1e-15$ ,  $\beta = 0.338$ ,  $N = 1191$

**AVVFLEPQWYR pc2**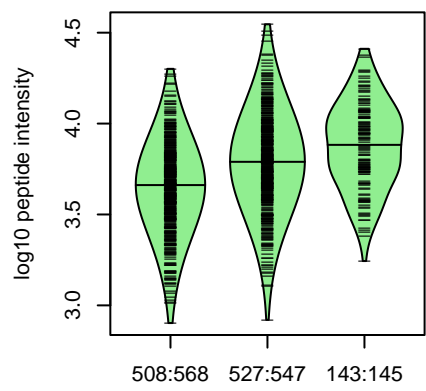

1:161588873:C:T\_T  
 $p = 4e-30$ ,  $\beta = 0.476$ ,  $N = 1178$

**EEDPIHLR pc2**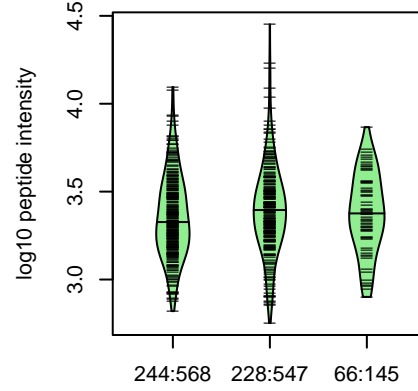

1:161588873:C:T\_T  
 $p = 0.18$ ,  $\beta = 0.0838$ ,  $N = 538$

**WVFKEEDPIHLR pc3**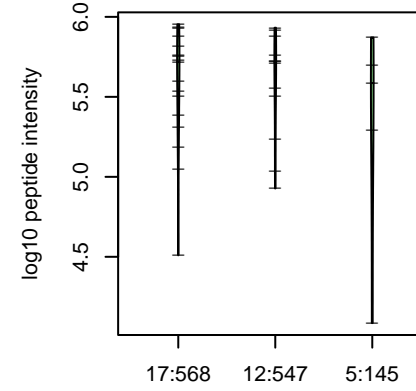

1:161588873:C:T\_T  
 $p = 0.34$ ,  $\beta = -0.215$ ,  $N = 34$

**DSGSYFCR pc2**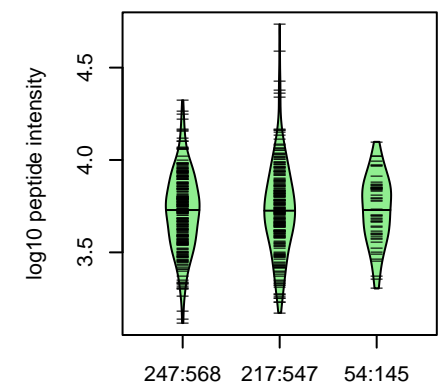

1:161588873:C:T\_T  
 $p = 0.61$ ,  $\beta = 0.0334$ ,  $N = 518$

**P08637 NP1**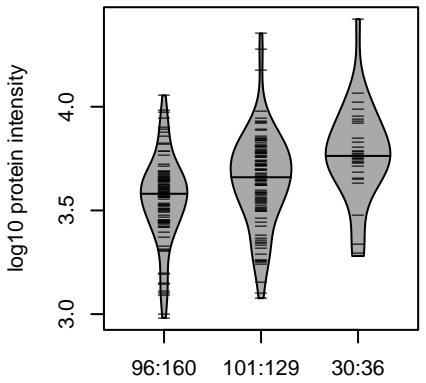

rs111384507  
 $p = 2.7e-07$ ,  $\beta = 0.482$ ,  $N = 227$

**AVVFLEPQWYR pc2**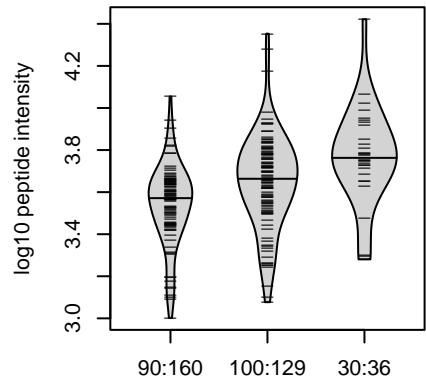

rs111384507  
 $p = 1e-07$ ,  $\beta = 0.499$ ,  $N = 220$

**DSGSYFCR pc2**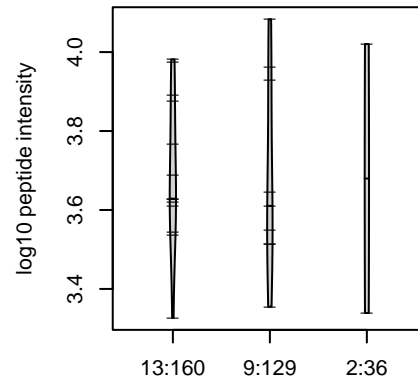

rs111384507  
 $p = 0.66$ ,  $\beta = 0.128$ ,  $N = 24$

Locus: 127 (Sort: 148)

Status: Replicated

80% power: No

SNP: 1:161588873:C:T

rsID: rs111384507

UniProtID: P08637

HGNC gene: FCGR3A

Type: Cis-pQTL

**PLG [trans]**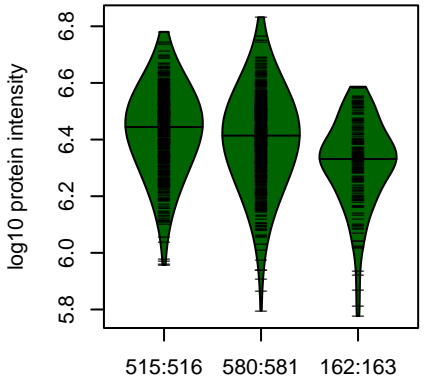

3:186390627:C:T\_T  
 $p = 1.1e-15$ ,  $\beta = -0.328$ ,  $N = 1257$

**NLDENYCR pc2**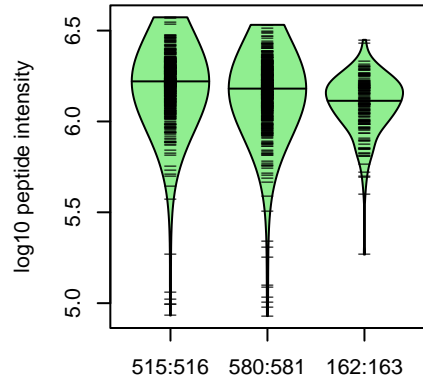

3:186390627:C:T\_T  
 $p = 3.2e-16$ ,  $\beta = -0.334$ ,  $N = 1257$

**ELRPWCFTTDPNK pc3**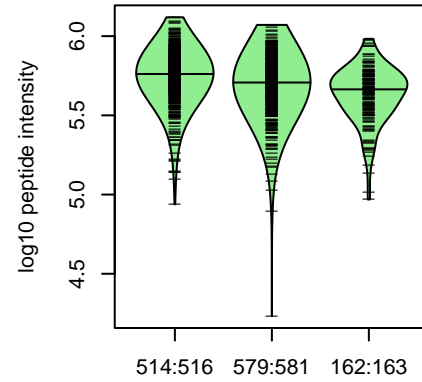

3:186390627:C:T\_T  
 $p = 4.1e-16$ ,  $\beta = -0.333$ ,  $N = 1255$

**WEYCNLK pc2**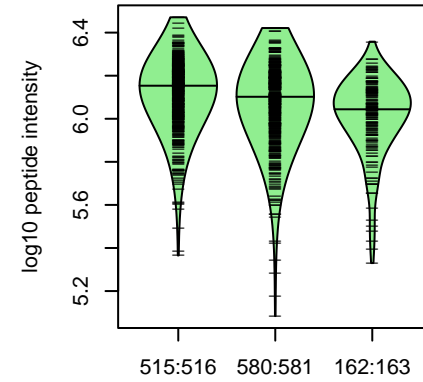

3:186390627:C:T\_T  
 $p = 7.1e-16$ ,  $\beta = -0.33$ ,  $N = 1257$

**GPWCFTTDPNVR pc2**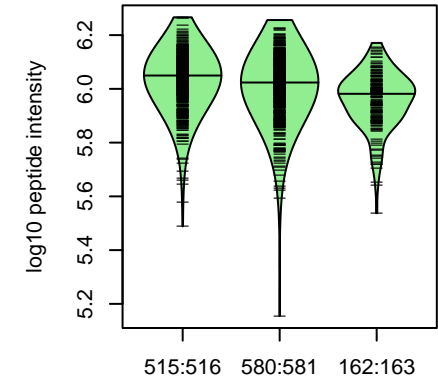

3:186390627:C:T\_T  
 $p = 1.3e-15$ ,  $\beta = -0.327$ ,  $N = 1257$

**P00747 NP5**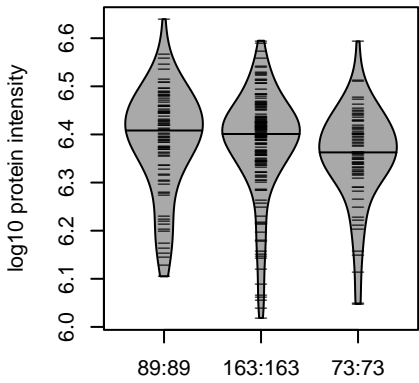

rs9898  
 $p = 0.015$ ,  $\beta = -0.191$ ,  $N = 325$

**TPENYPNAGLTMNYCR pc3**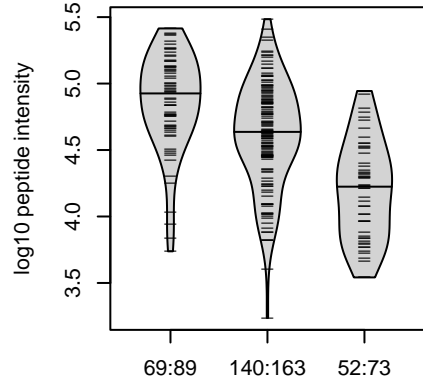

rs9898  
 $p = 4.1e-15$ ,  $\beta = -0.667$ ,  $N = 261$

**GNVAVTVSGHTCQHWSAQTPHTHR**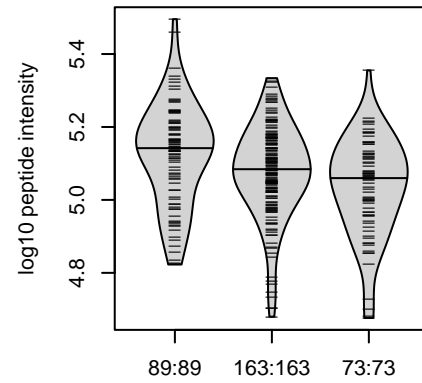

rs9898  
 $p = 1.2e-05$ ,  $\beta = -0.336$ ,  $N = 325$

**DVVLFEK pc2**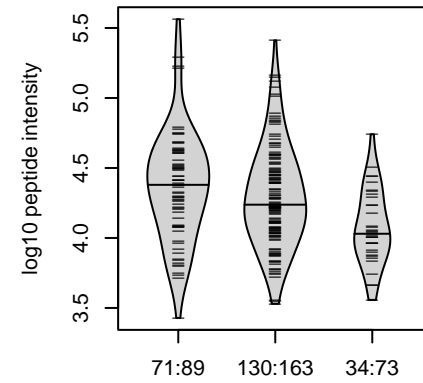

rs9898  
 $p = 0.00087$ ,  $\beta = -0.325$ ,  $N = 235$

**CTTPPPSSGPTYQLK pc2**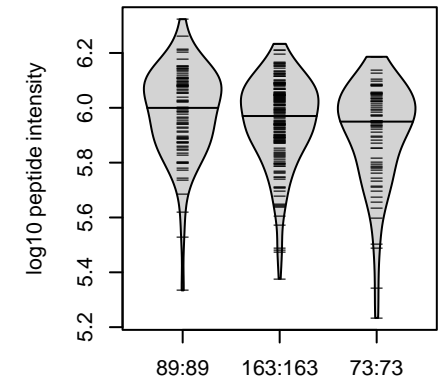

rs9898  
 $p = 0.0016$ ,  $\beta = -0.244$ ,  $N = 325$

**YILQGVTSWGLGCAR pc2  
rs3124784 REF**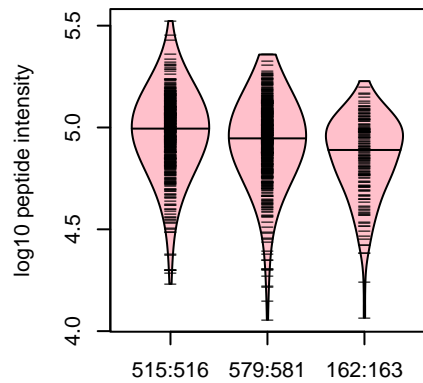

3:186390627:C:T\_T  
 $p = 0.43$ ,  $\text{model} = \text{DOM}$ ,  $N = 1256$

Locus: 128 (Sort: 149)  
 Status: Not replicated  
 80% power: No  
 SNP: 3:186390627:C:T  
 rsID: rs9898  
 UniProtID: P00747  
 HGNC gene: PLG  
 Type: Trans-pQTL

**TPSAB1 [trans]**

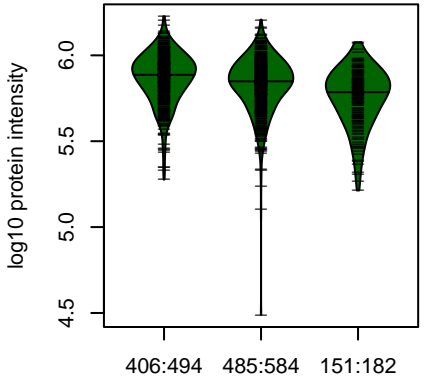

3:186391274:G:A\_A  
 $p = 1.4e-13$ ,  $\beta = -0.327$ ,  $N = 1042$

**WPWQVSLR pc2**

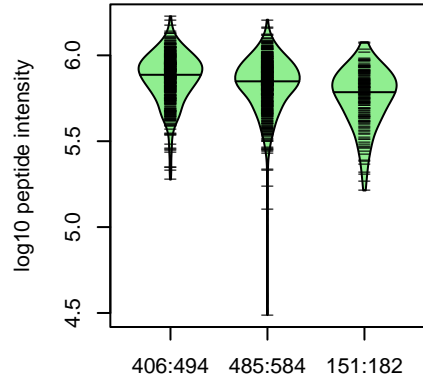

3:186391274:G:A\_A  
 $p = 1.4e-13$ ,  $\beta = -0.327$ ,  $N = 1042$

**Q15661 NP5**

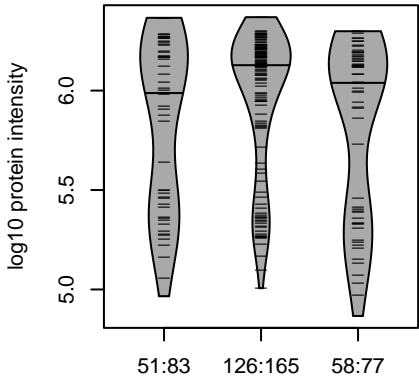

rs59123177  
 $p = 0.29$ ,  $\beta = -0.1$ ,  $N = 235$

**WPWQVSLR pc2**

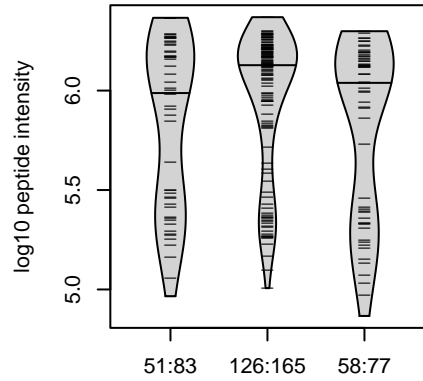

rs59123177  
 $p = 0.32$ ,  $\beta = -0.0939$ ,  $N = 235$

Locus: 128 (Sort: 150)  
 Status: Not replicated  
 80% power: No  
 SNP: 3:186391274:G:A  
 rsID: rs59123177  
 UniProtID: Q15661  
 HGNC gene: TPSAB1  
 Type: Trans-pQTL

**FABP4 [trans]**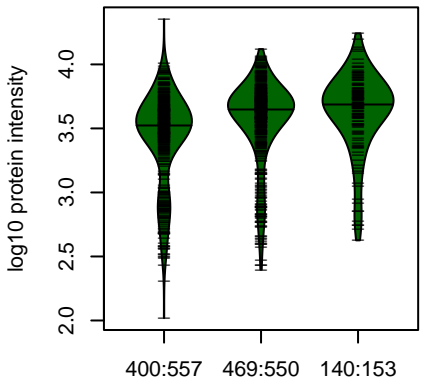

9:136144284:T:A\_A  
 $p = 1.2e-15$ ,  $\beta = 0.36$ ,  $N = 1009$

**LVVECVMK pc2**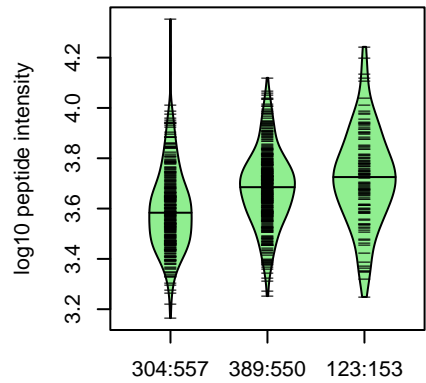

9:136144284:T:A\_A  
 $p = 2.7e-15$ ,  $\beta = 0.392$ ,  $N = 816$

**PNMIISVNGDVITIK pc2**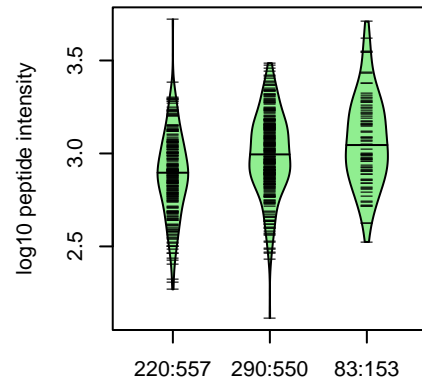

9:136144284:T:A\_A  
 $p = 1.5e-11$ ,  $\beta = 0.399$ ,  $N = 593$

**STITLDGGVLVHVQK pc2**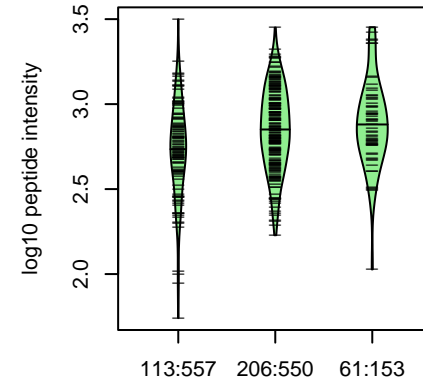

9:136144284:T:A\_A  
 $p = 4.8e-05$ ,  $\beta = 0.308$ ,  $N = 380$

**NTEISFILGQEFDEV TADDRK pc3**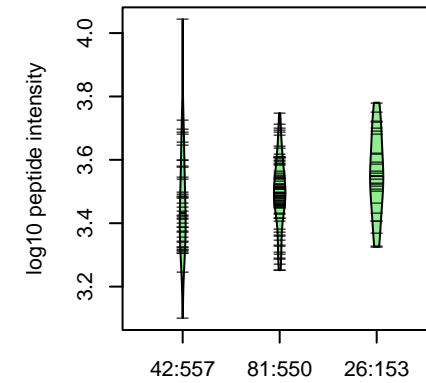

9:136144284:T:A\_A  
 $p = 0.0071$ ,  $\beta = 0.32$ ,  $N = 149$

**P15090 NP2**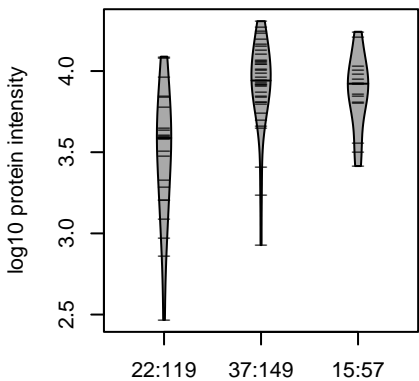

rs597988  
 $p = 0.00052$ ,  $\beta = 0.534$ ,  $N = 74$

**LVSSNFDDYMK pc2**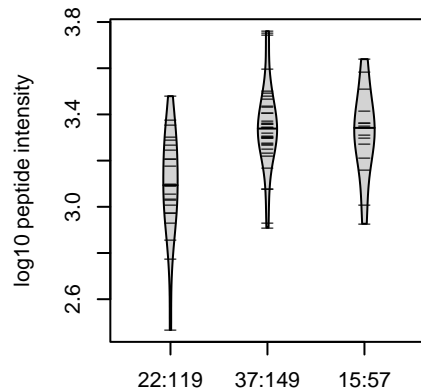

rs597988  
 $p = 7.9e-05$ ,  $\beta = 0.6$ ,  $N = 74$

Locus: 129 (Sort: 151)

Status: Not replicated

80% power: No

SNP: 9:136144284:T:A

rsID: rs597988

UniProtID: P15090

HGNC gene: FABP4

Type: Trans-pQTL

### GGTA1P [cis]

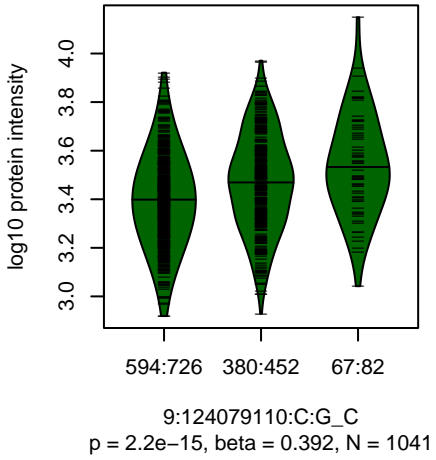

### NPEVDDSSAQK pc2

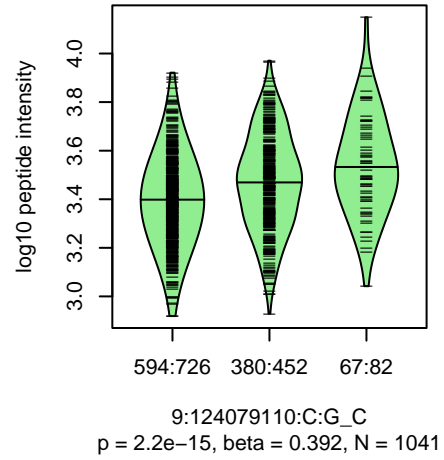

### Q4G0N0 NP2

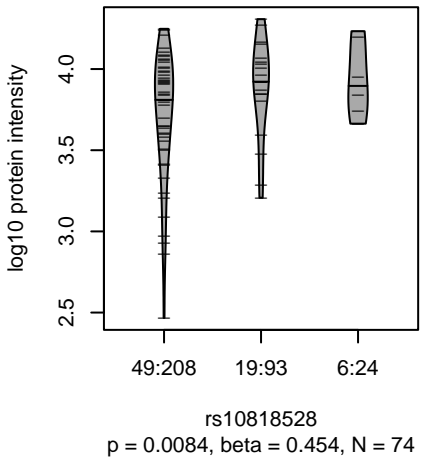

### LVSSNFDDYMK pc2

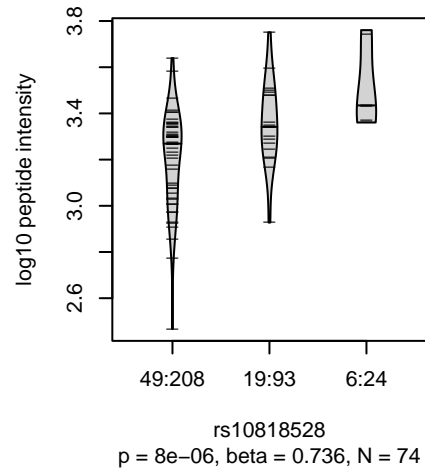

Locus: 130 (Sort: 152)  
Status: Not replicated  
80% power: No  
SNP: 9:124079110:C:G  
rsID: rs10818528  
UniProtID: Q4G0N0  
HGNC gene: GGTA1P  
Type: Cis-pQTL

**MBL2 [cis]**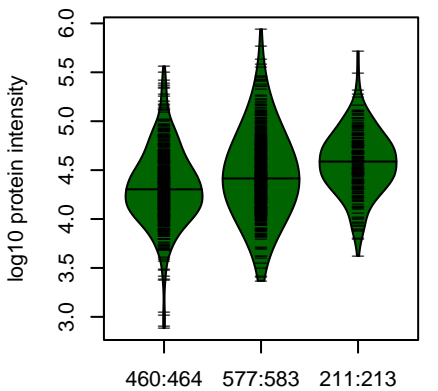

10:54632800:C:T\_T  
 $p = 2.8e-15$ ,  $\beta = 0.312$ ,  $N = 1248$

**WLTFSLGK pc2**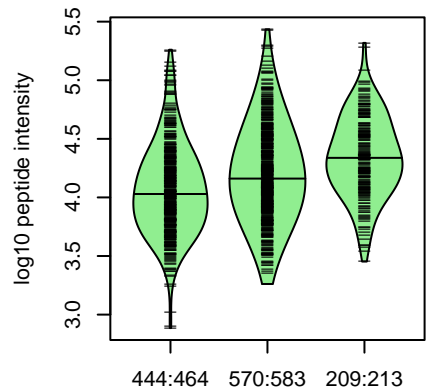

10:54632800:C:T\_T  
 $p = 1.3e-15$ ,  $\beta = 0.319$ ,  $N = 1223$

**EEAFLGITDEK pc2**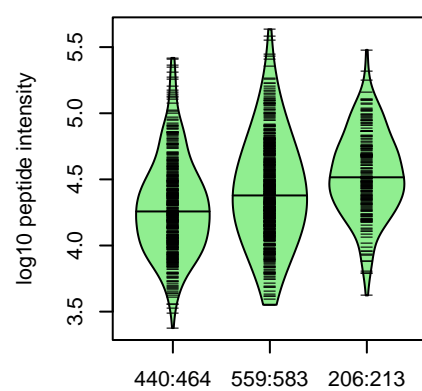

10:54632800:C:T\_T  
 $p = 6.3e-15$ ,  $\beta = 0.313$ ,  $N = 1205$

**FFLTNGEIMTFEK pc2**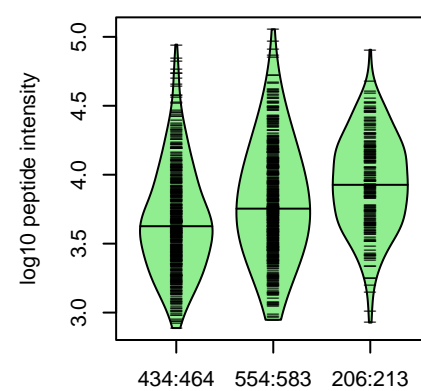

10:54632800:C:T\_T  
 $p = 9.6e-15$ ,  $\beta = 0.312$ ,  $N = 1194$

**TEGQFVDLTGNR pc2**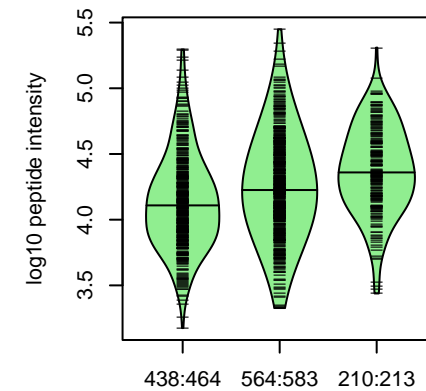

10:54632800:C:T\_T  
 $p = 1.8e-13$ ,  $\beta = 0.295$ ,  $N = 1212$

**P11226 NP2**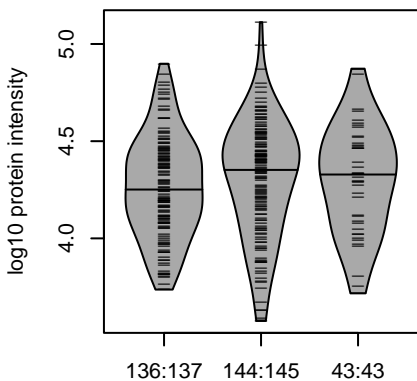

rs67316945  
 $p = 0.097$ ,  $\beta = 0.133$ ,  $N = 323$

**WLTFSLGK pc2**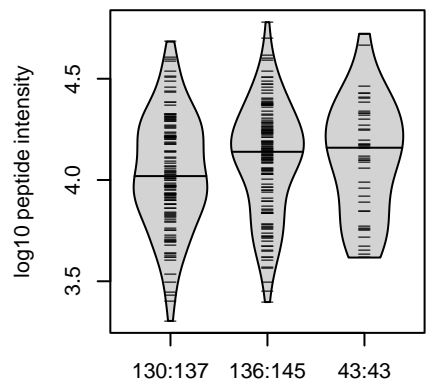

rs67316945  
 $p = 0.022$ ,  $\beta = 0.185$ ,  $N = 309$

**FQASVATPR pc2**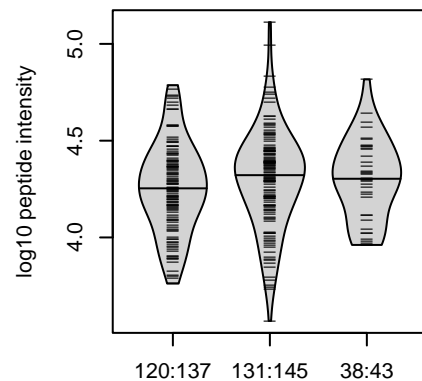

rs67316945  
 $p = 0.066$ ,  $\beta = 0.156$ ,  $N = 289$

**NAAENGAIQNLIK pc2**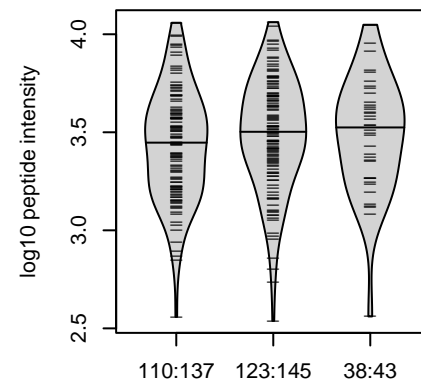

rs67316945  
 $p = 0.11$ ,  $\beta = 0.139$ ,  $N = 271$

**TEGQFVDLTGNR pc2**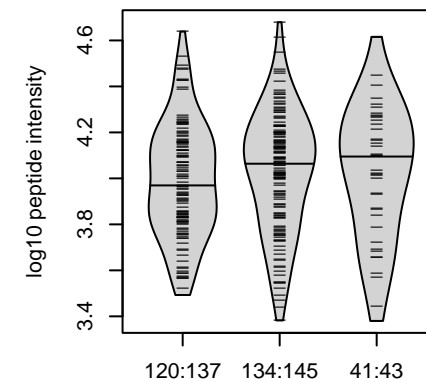

rs67316945  
 $p = 0.13$ ,  $\beta = 0.125$ ,  $N = 295$

Locus: 131 (Sort: 153)

Status: Not replicated

80% power: No

SNP: 10:54632800:C:T

rsID: rs67316945

UniProtID: P11226

HGNC gene: MBL2

Type: Cis-pQTL



**MST1 [cis]**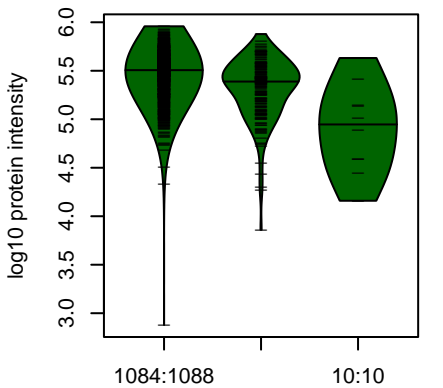

3:48612471:G:A\_A  
 $p = 3.4e-15$ ,  $\beta = -0.586$ ,  $N = 1255$

**CEIAGWGETK pc2**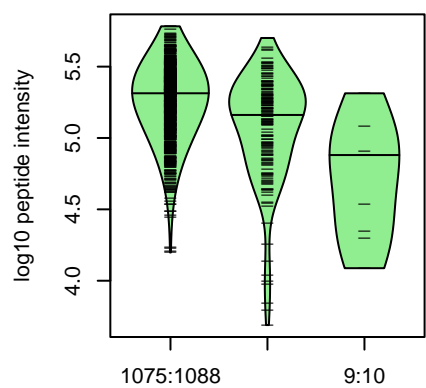

3:48612471:G:A\_A  
 $p = 1.6e-15$ ,  $\beta = -0.6$ ,  $N = 1244$

**MVCGPSGSQVLVLLK pc2**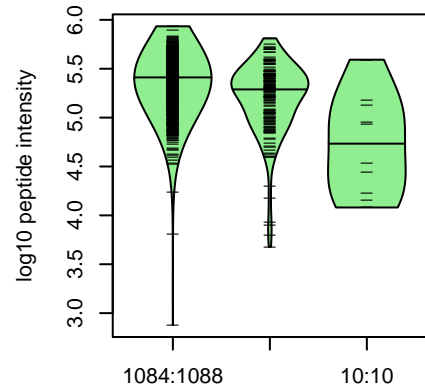

3:48612471:G:A\_A  
 $p = 1.9e-14$ ,  $\beta = -0.57$ ,  $N = 1255$

**QEATTVSCFR pc2**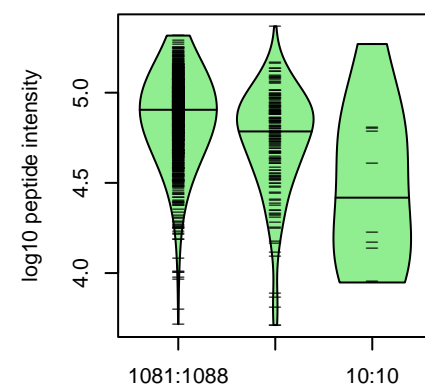

3:48612471:G:A\_A  
 $p = 5.8e-13$ ,  $\beta = -0.538$ ,  $N = 1251$

**CGPLMDCR pc2**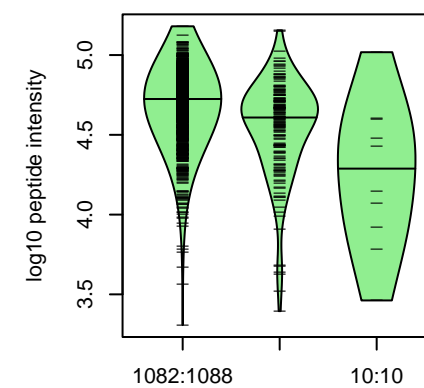

3:48612471:G:A\_A  
 $p = 1e-12$ ,  $\beta = -0.533$ ,  $N = 1252$

**G3XAK1 NP3**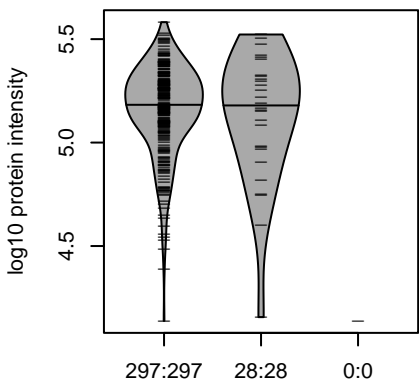

rs76140443  
 $p = 0.73$ ,  $\beta = -0.0666$ ,  $N = 325$

**TCIMNNGVGYR pc2**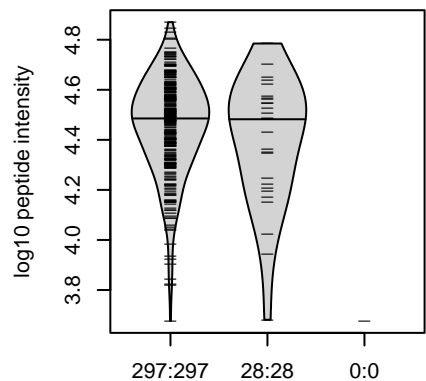

rs76140443  
 $p = 0.075$ ,  $\beta = -0.347$ ,  $N = 325$

**WDAQIPHQHR pc2**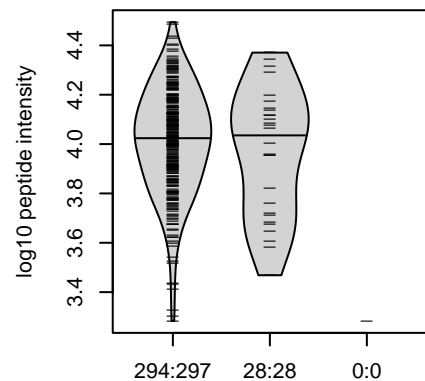

rs76140443  
 $p = 0.17$ ,  $\beta = -0.269$ ,  $N = 322$

**QEATTVSCFR pc2**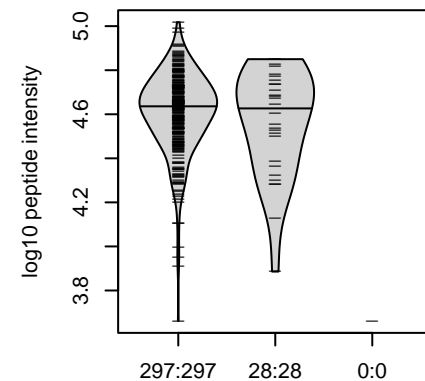

rs76140443  
 $p = 0.2$ ,  $\beta = -0.253$ ,  $N = 325$

**CTDDVRPQDCYHGAGEQYR pc4**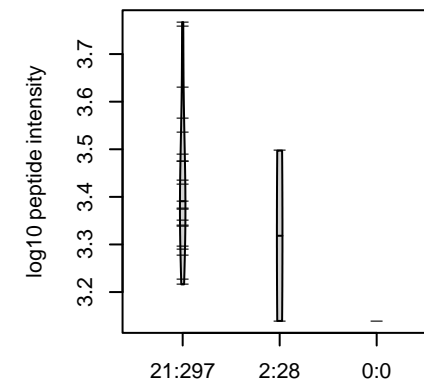

rs76140443  
 $p = 0.22$ ,  $\beta = -0.833$ ,  $N = 23$

**SCWPAVFTR pc2  
rs3197999 ALT**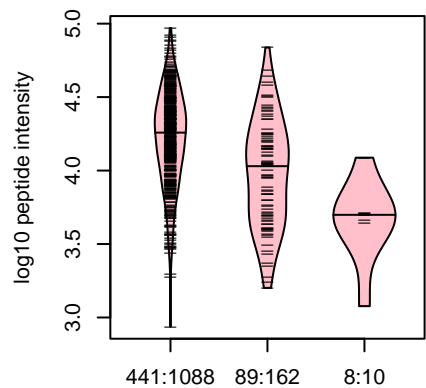

3:48612471:G:A\_A  
 $p = 0.00013$ ,  $\text{model} = \text{REC}$ ,  $N = 538$

**WPAVFTR pc2  
rs3197999 REF**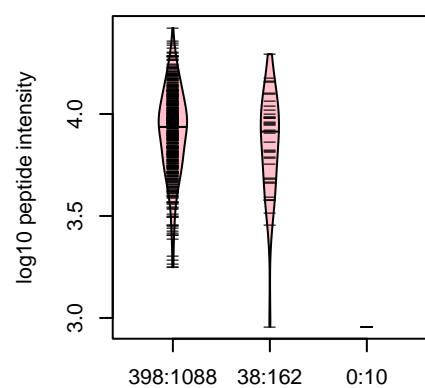

3:48612471:G:A\_A  
 $p = 0.00019$ ,  $\text{model} = \text{REC}$ ,  $N = 436$

Locus: 132 (Sort: 154)  
 Status: Not replicated  
 80% power: No  
 SNP: 3:48612471:G:A  
 rsID: rs76140443  
 UniProtID: G3XAK1  
 HGNC gene: MST1  
 Type: Cis-pQTL

### HLA-G [cis]

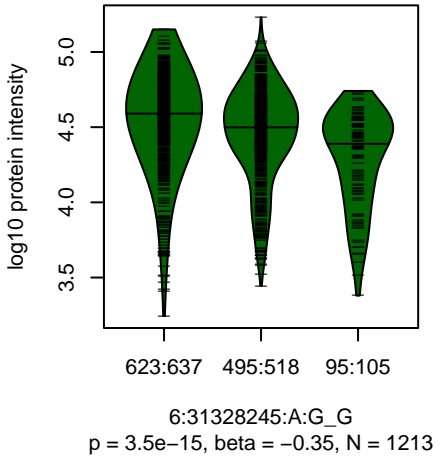

### DYLALNEDLR pc2

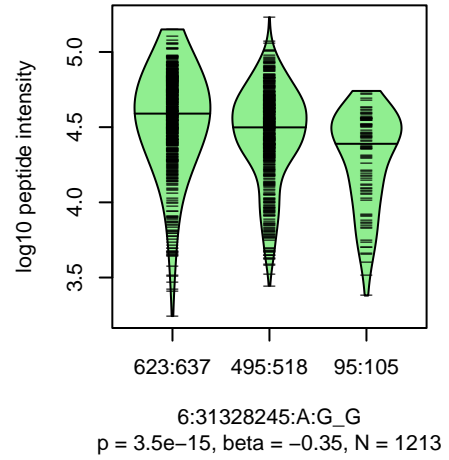

### Q5RJ85 NP1

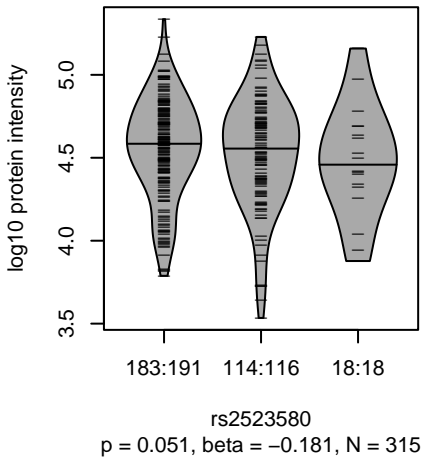

### DYLALNEDLR pc2

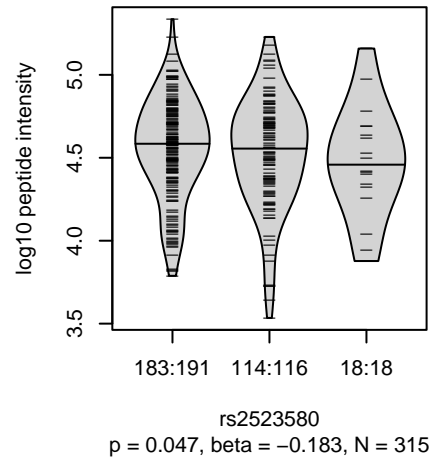

### WAAVVPSGEEQR pc2 rs707908;rs1736924 ALT

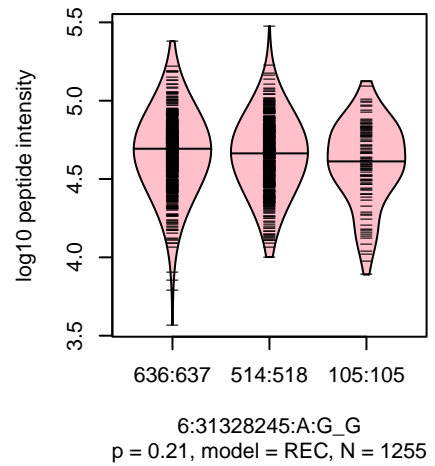

Locus: 133 (Sort: 155)  
Status: Not replicated  
80% power: No  
SNP: 6:31328245:A:G  
rsID: rs2523580  
UniProtID: Q5RJ85  
HGNC gene: HLA-G  
Type: Cis-pQTL

**HLA-B [cis]**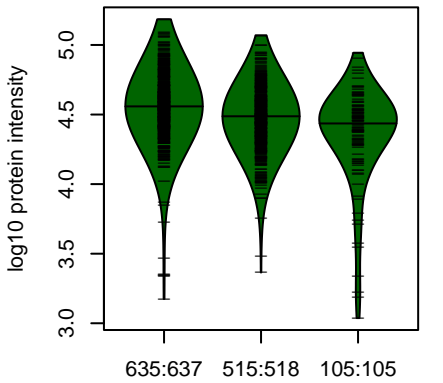

6:31328245:A:G\_G  
p = 2.2e-14, beta = -0.331, N = 1255

**SWTAADTAAQITQR pc2**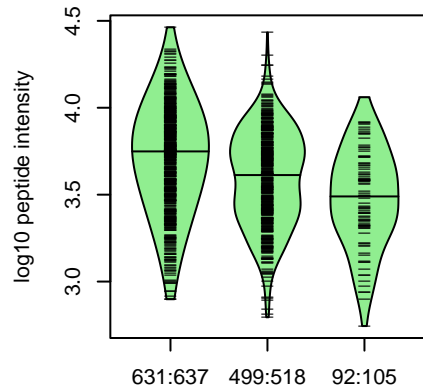

6:31328245:A:G\_G  
p = 1.9e-15, beta = -0.355, N = 1222

**FSDAASPR pc2**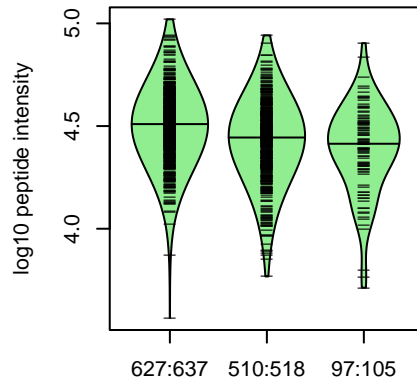

6:31328245:A:G\_G  
p = 5.1e-12, beta = -0.306, N = 1234

**DYIALNEDLR pc2**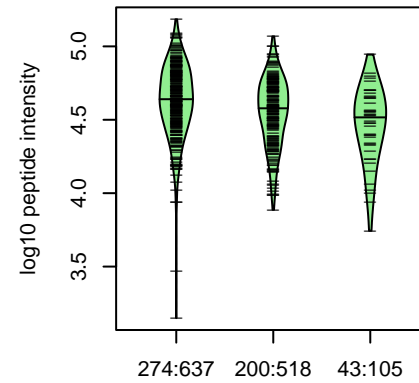

6:31328245:A:G\_G  
p = 1.1e-06, beta = -0.327, N = 517

**DGEDQTQDTELVETRPAGDR pc3**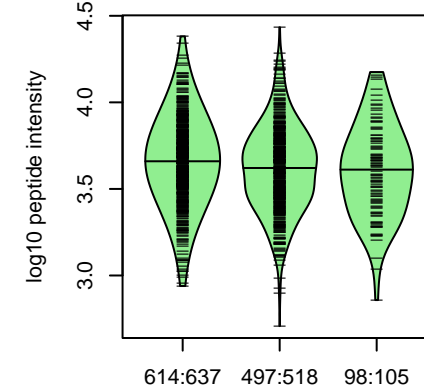

6:31328245:A:G\_G  
p = 0.003, beta = -0.133, N = 1209

**P01889 NP2**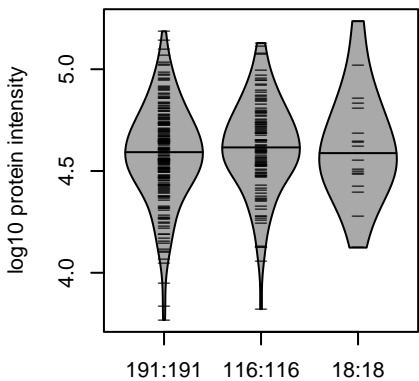

rs2523580  
p = 0.36, beta = 0.084, N = 325

**SWTAADTAAQITQR pc2**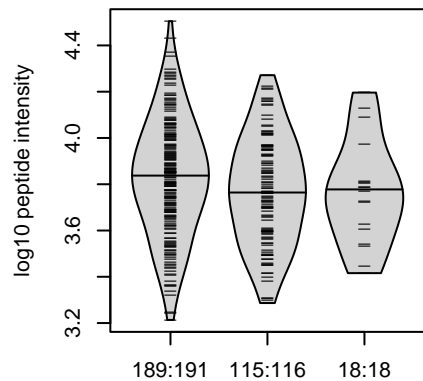

rs2523580  
p = 0.091, beta = -0.155, N = 322

**FSDAASPR pc2**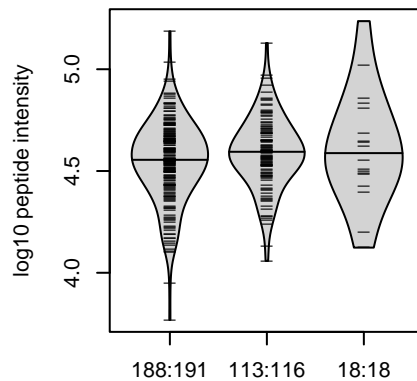

rs2523580  
p = 0.12, beta = 0.145, N = 319

**YTCHVQHEGLPK pc2**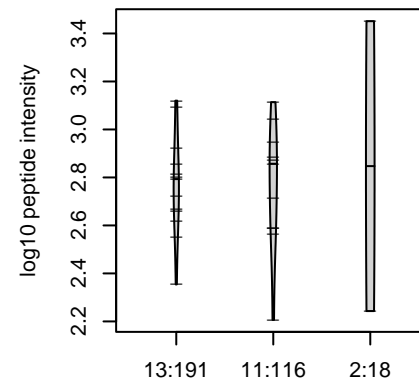

rs2523580  
p = 0.16, beta = -0.403, N = 26

**RAYLEGECVEWLR pc3**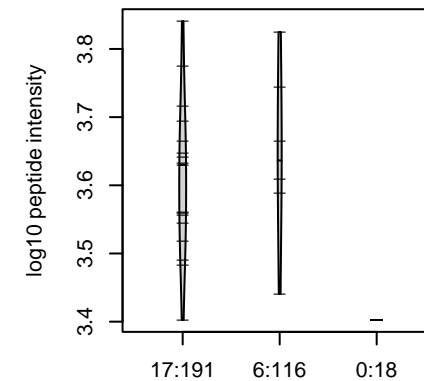

rs2523580  
p = 0.16, beta = 0.61, N = 23

Locus: 133 (Sort: 156)  
Status: Not replicated  
80% power: No  
SNP: 6:31328245:A:G  
rsID: rs2523580  
UniProtID: P01889  
HGNC gene: HLA-B  
Type: Cis-pQTL

**FISVG YVDDTQFVR pc2  
rs1050437 REF**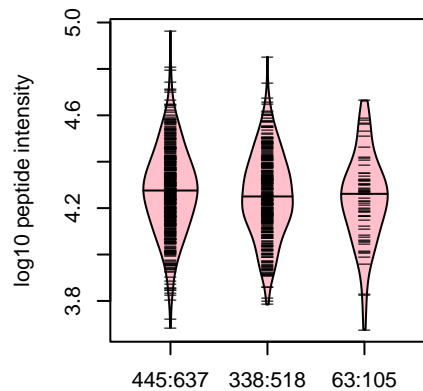

6:31328245:A:G\_G  
p = 0.041, model = REC, N = 846

**GEPRFISVG YVDDTQFVR pc3  
rs1050437 REF**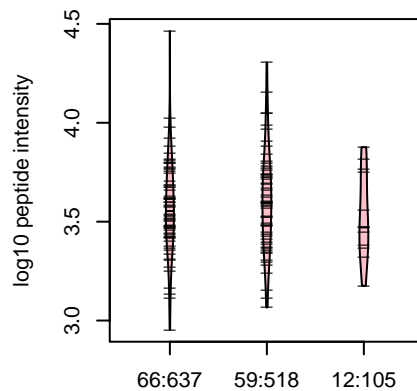

6:31328245:A:G\_G  
p = 0.59, model = REC, N = 137

**WAAVVVPSGEEQR pc2  
rs707908;rs1736924 ALT**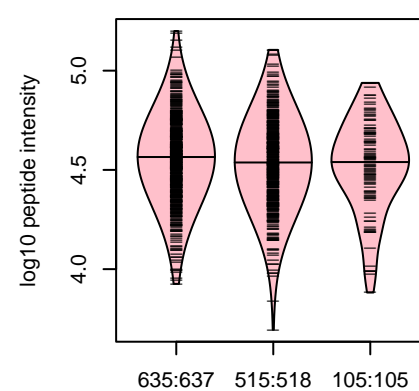

6:31328245:A:G\_G  
p = 0.68, model = REC, N = 1255

**CTSS [trans]**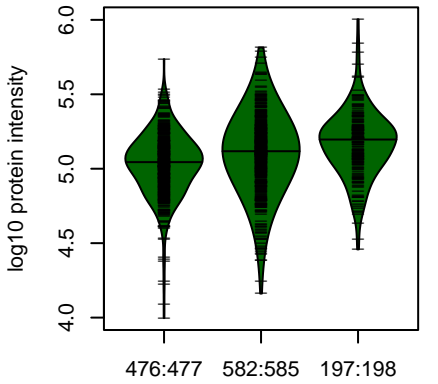

3:186454180:A:C\_C  
 $p = 3.9e-15$ ,  $\beta = 0.313$ ,  $N = 1255$

**GPVSVGVDAR pc2**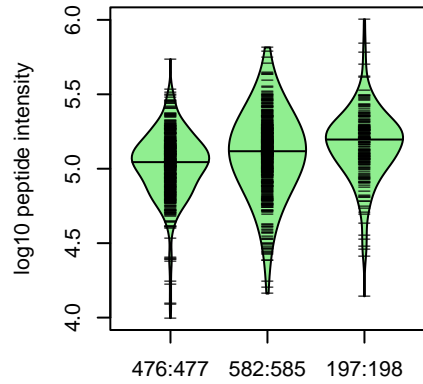

3:186454180:A:C\_C  
 $p = 8.6e-15$ ,  $\beta = 0.309$ ,  $N = 1255$

**GIDSDASYPYK pc2**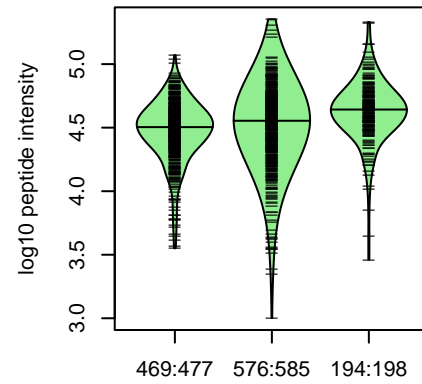

3:186454180:A:C\_C  
 $p = 3.3e-13$ ,  $\beta = 0.293$ ,  $N = 1239$

**GNHCGIASFPYPEI pc2**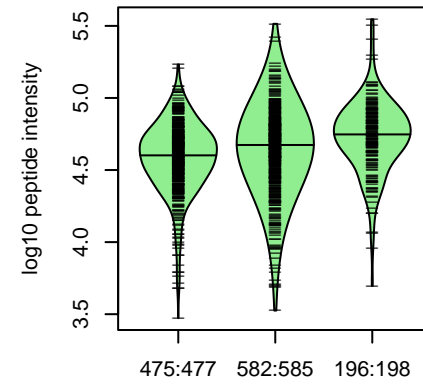

3:186454180:A:C\_C  
 $p = 1e-12$ ,  $\beta = 0.285$ ,  $N = 1253$

**NSWGHNFGEEGYIR pc3**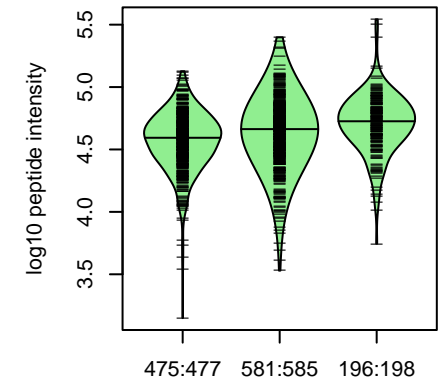

3:186454180:A:C\_C  
 $p = 1.7e-12$ ,  $\beta = 0.282$ ,  $N = 1252$

**P25774 NP3**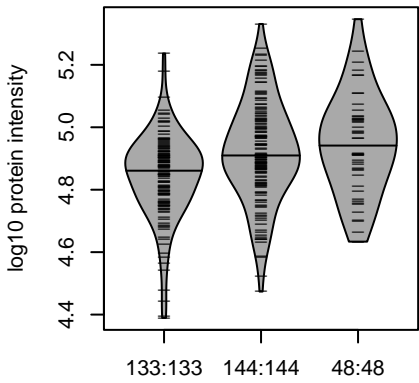

rs5030062  
 $p = 1.2e-06$ ,  $\beta = 0.372$ ,  $N = 325$

**GPVSVGVDAR pc2**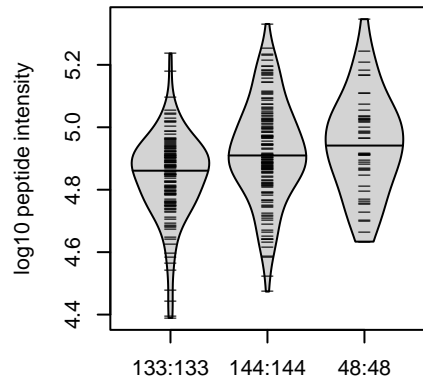

rs5030062  
 $p = 1.6e-06$ ,  $\beta = 0.37$ ,  $N = 325$

**LVLSAQNLVDCSTEK pc2**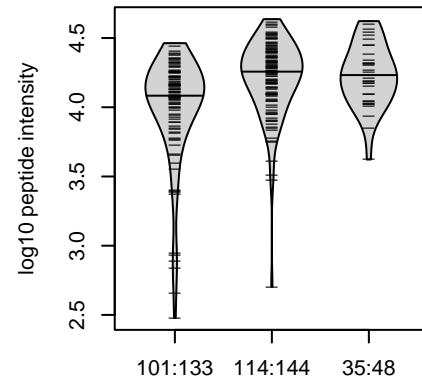

rs5030062  
 $p = 2.3e-06$ ,  $\beta = 0.419$ ,  $N = 250$

**GIDSDASYPYK pc2**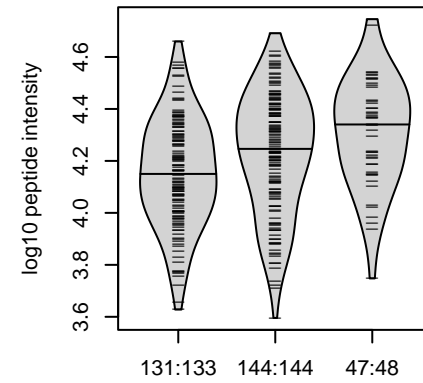

rs5030062  
 $p = 2.4e-05$ ,  $\beta = 0.329$ ,  $N = 322$

**NSWGHNFGEEGYIR pc3**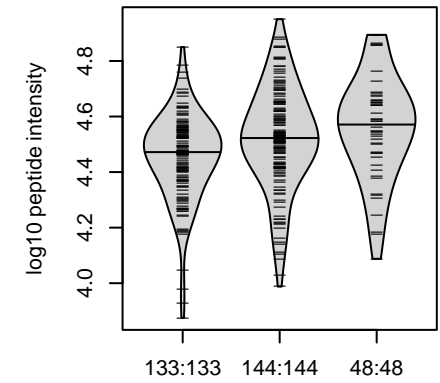

rs5030062  
 $p = 3.7e-05$ ,  $\beta = 0.319$ ,  $N = 325$

**ILPDSVDWR pc2  
rs2230061 REF**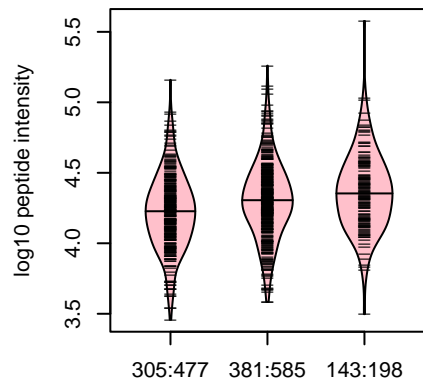

3:186454180:A:C\_C  
 $p = 0.041$ ,  $\text{model} = \text{DOM}$ ,  $N = 829$

Locus: 134 (Sort: 157)  
 Status: Replicated  
 80% power: No  
 SNP: 3:186454180:A:C  
 rsID: rs5030062  
 UniProtID: P25774  
 HGNC gene: CTSS  
 Type: Trans-pQTL

**BRE [trans]**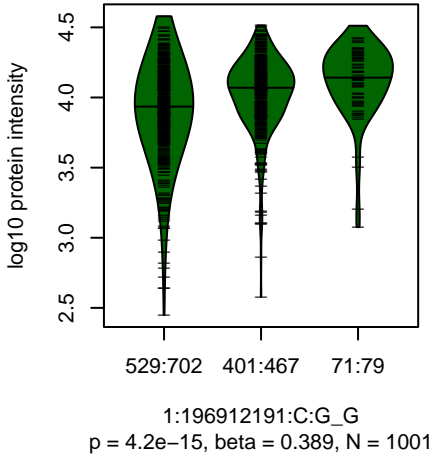**VQYVIQGYHK pc2**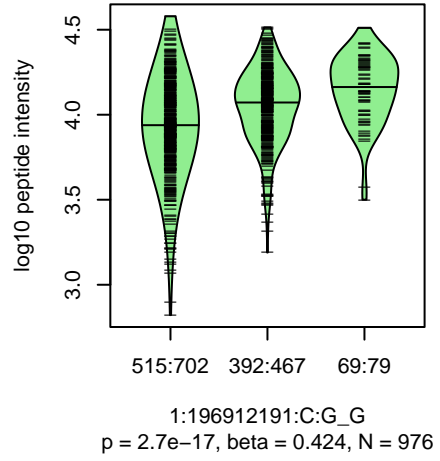**ISPMLSPFISSVVR pc2**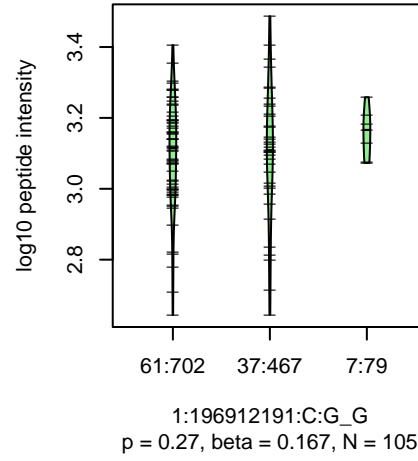**SGCTSLTPGNCDR pc2**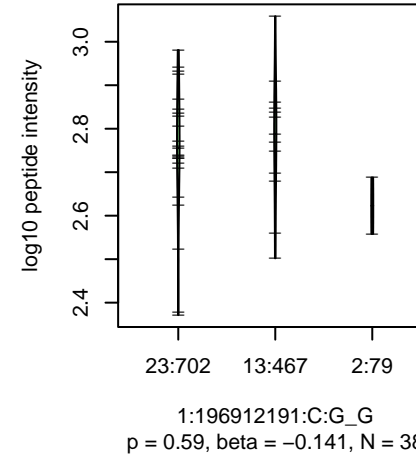**Q9NXR7 NP3**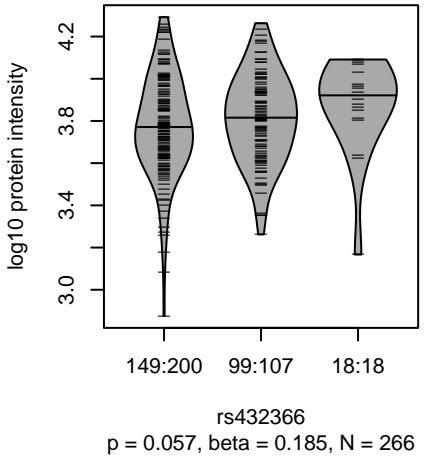**VQYVIQGYHK pc2**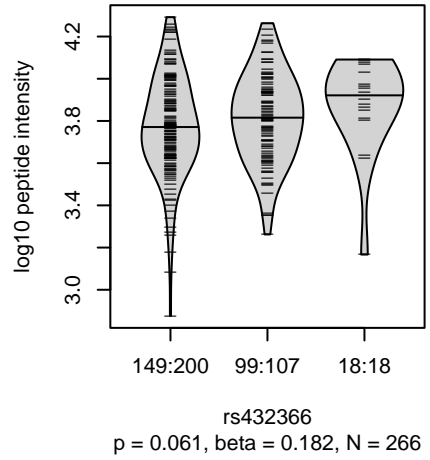

Locus: 135 (Sort: 158)  
 Status: Not replicated  
 80% power: No  
 SNP: 1:196912191:C:G  
 rsID: rs432366  
 UniProtID: Q9NXR7  
 HGNC gene: BRE  
 Type: Trans-pQTL

**CFH NA**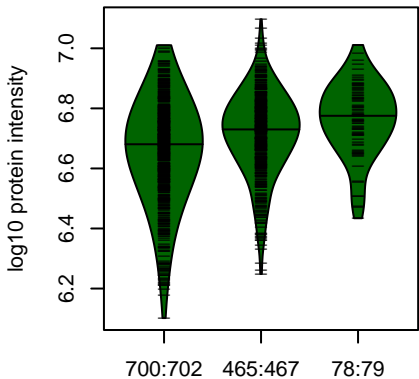

1:196912191:C:G\_G  
 $p = 1.4e-13$ ,  $\beta = 0.337$ ,  $N = 1243$

**CLHPCVISR pc2**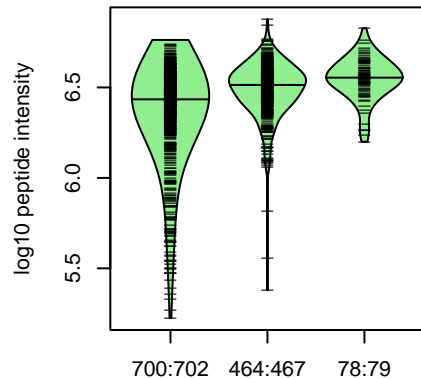

1:196912191:C:G\_G  
 $p = 6.4e-21$ ,  $\beta = 0.425$ ,  $N = 1242$

**NGQWSEPPK pc2**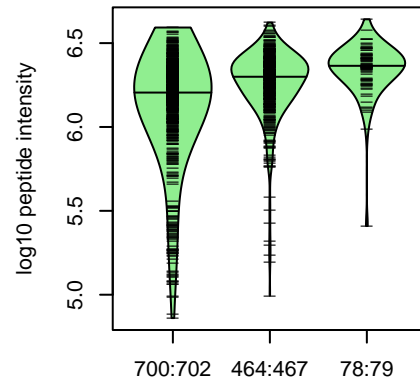

1:196912191:C:G\_G  
 $p = 2.2e-20$ ,  $\beta = 0.419$ ,  $N = 1242$

**EIMENYNIALR pc3**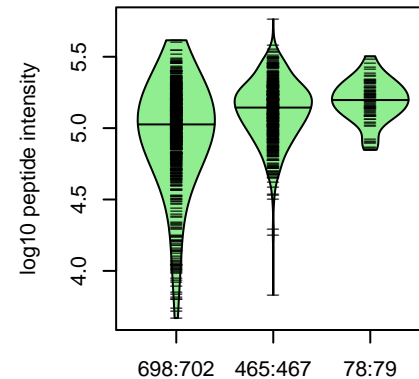

1:196912191:C:G\_G  
 $p = 2.8e-19$ ,  $\beta = 0.408$ ,  $N = 1241$

**TTCWDGK pc2**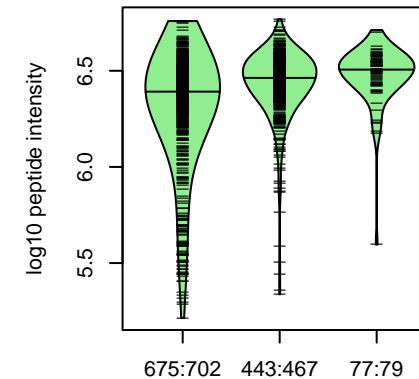

1:196912191:C:G\_G  
 $p = 8e-16$ ,  $\beta = 0.372$ ,  $N = 1195$

**A0A024R962 NP3**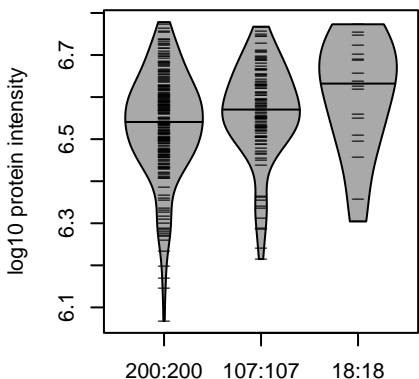

rs432366  
 $p = 0.0021$ ,  $\beta = 0.281$ ,  $N = 325$

**EIMENYNIALR pc3**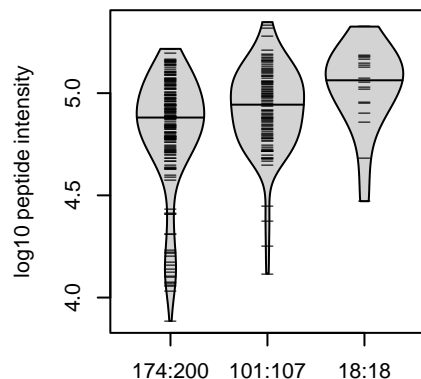

rs432366  
 $p = 1.2e-05$ ,  $\beta = 0.407$ ,  $N = 293$

**TTCWDGK pc2**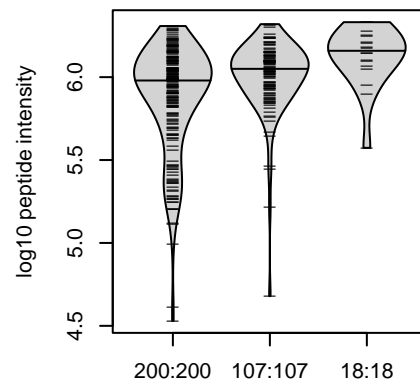

rs432366  
 $p = 2.9e-05$ ,  $\beta = 0.379$ ,  $N = 325$

**GDAVCTESGWR pc2**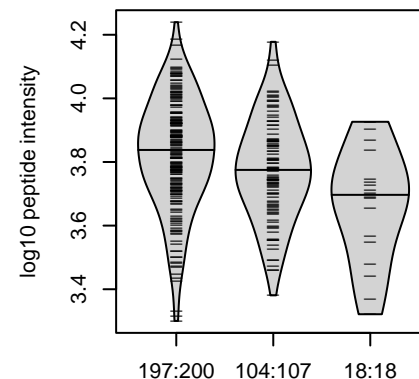

rs432366  
 $p = 2e-04$ ,  $\beta = -0.339$ ,  $N = 319$

**CLHPCVISR pc2**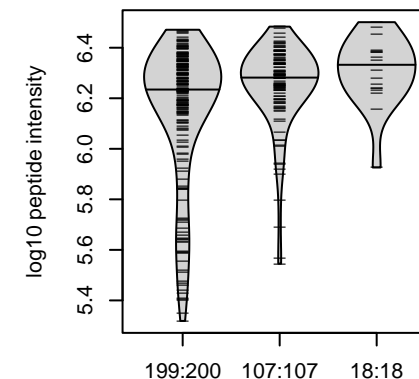

rs432366  
 $p = 0.00042$ ,  $\beta = 0.321$ ,  $N = 324$

**SLGNIIMVCR pc2  
rs800292 ALT**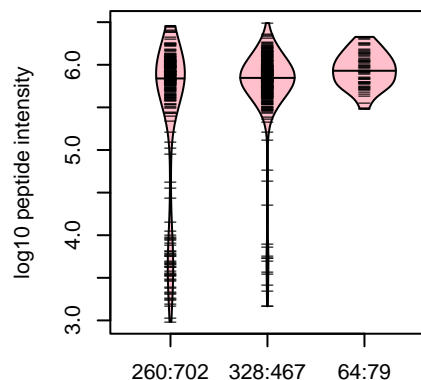

1:196912191:C:G\_G  
 $p = 9e-35$ ,  $\text{model} = \text{REC}$ ,  $N = 660$

**CYFPYLENGYNQNYGR pc3  
rs1061170 ALT**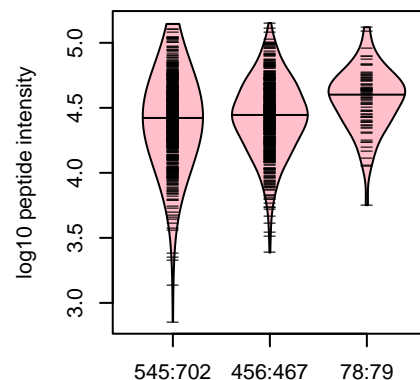

1:196912191:C:G\_G  
 $p = 2.4e-29$ ,  $\text{model} = \text{REC}$ ,  $N = 1091$

**SPPDISHGVVAHMSDSYQYGEEVTK  
rs1065489 ALT**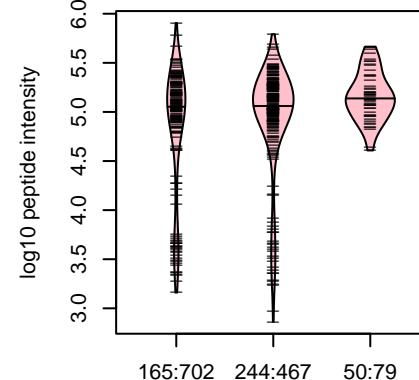

1:196912191:C:G\_G  
 $p = 3.4e-28$ ,  $\text{model} = \text{REC}$ ,  $N = 464$

**CYFPYLENGYNQNHGR pc3  
rs1061170 REF**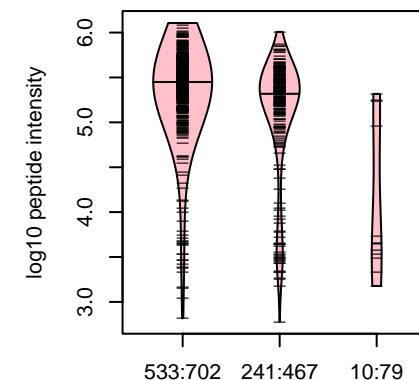

1:196912191:C:G\_G  
 $p = 1.8e-27$ ,  $\text{model} = \text{REC}$ ,  $N = 792$

Locus: 135 (Sort: 159)  
 Status: Not replicated  
 80% power: No  
 SNP: 1:196912191:C:G  
 rsID: rs432366  
 UniProtID: A0A024R962  
 HGNC gene: CFH  
 Type: NA

**HSPA8 [trans]**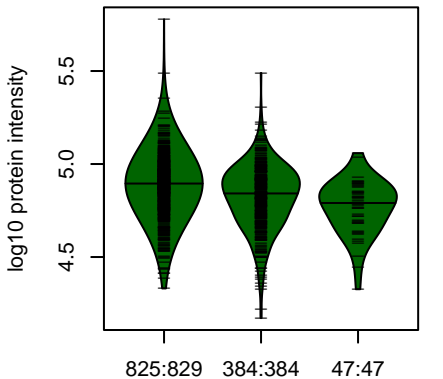

3:186394038:G:C\_C  
 $p = 4.3e-15$ ,  $\beta = -0.391$ ,  $N = 1256$

**TTPSYVAFTDTER pc2**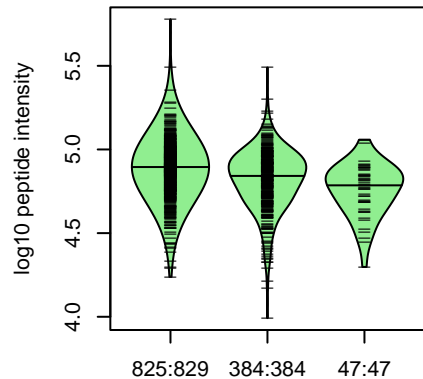

3:186394038:G:C\_C  
 $p = 2.1e-15$ ,  $\beta = -0.395$ ,  $N = 1256$

**RFDDAVVQSDMK pc3**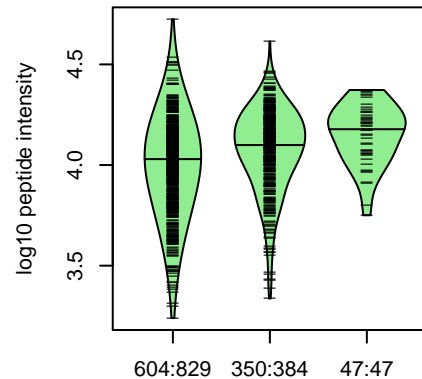

3:186394038:G:C\_C  
 $p = 3.3e-12$ ,  $\beta = 0.371$ ,  $N = 1001$

**IINEPTAAAIAYGLDK pc2**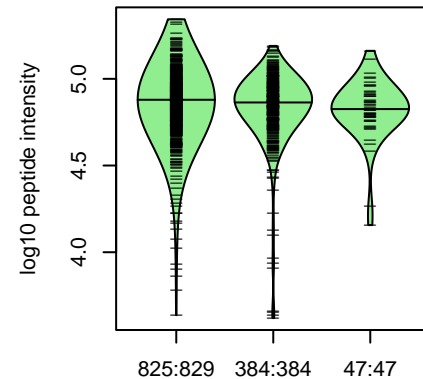

3:186394038:G:C\_C  
 $p = 0.011$ ,  $\beta = -0.128$ ,  $N = 1256$

**ARFEELNADLFR pc2**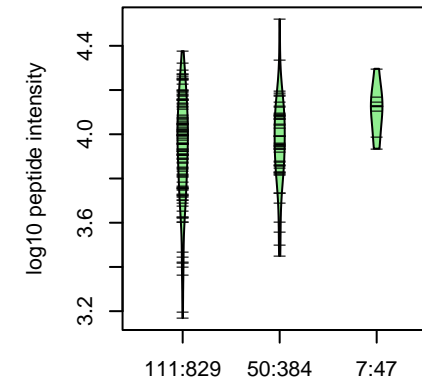

3:186394038:G:C\_C  
 $p = 0.035$ ,  $\beta = 0.28$ ,  $N = 168$

**P11142 NP1**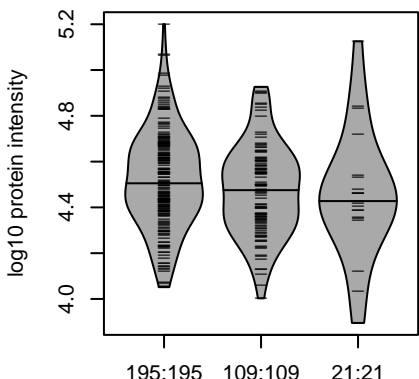

rs16860992  
 $p = 0.087$ ,  $\beta = -0.152$ ,  $N = 325$

**TTPSYVAFTDTER pc2**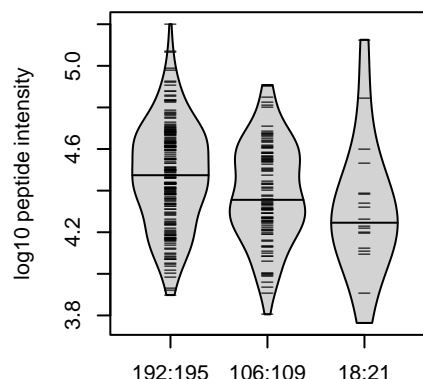

rs16860992  
 $p = 0.0031$ ,  $\beta = -0.271$ ,  $N = 316$

**RFDDAVVQSDMK pc3**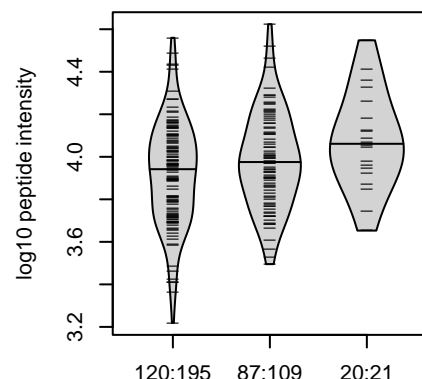

rs16860992  
 $p = 0.0057$ ,  $\beta = 0.275$ ,  $N = 227$

**LLQDFFNKG pc2**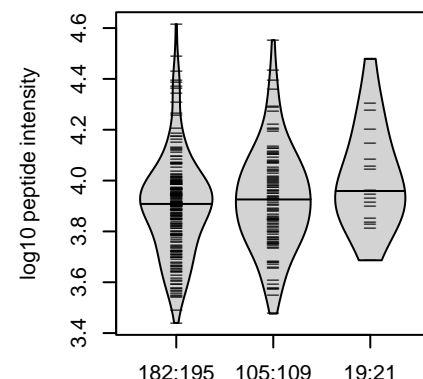

rs16860992  
 $p = 0.011$ ,  $\beta = 0.233$ ,  $N = 306$

**GTLDPVEK pc2**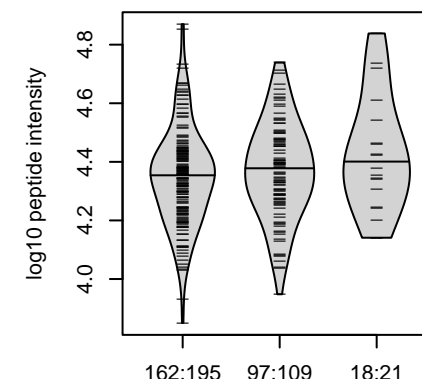

rs16860992  
 $p = 0.018$ ,  $\beta = 0.226$ ,  $N = 277$

Locus: 136 (Sort: 160)

Status: Not replicated

80% power: No

SNP: 3:186394038:G:C

rsID: rs16860992

UniProtID: P11142

HGNC gene: HSPA8

Type: Trans-pQTL

**C8G [cis]**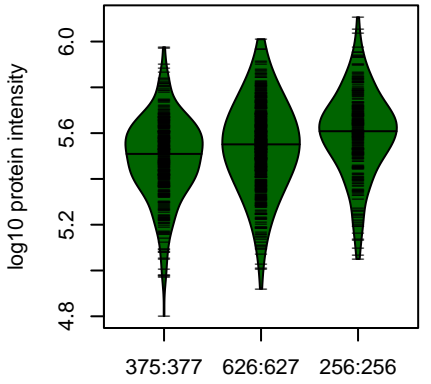

9:139840471:G:T\_G  
 p = 4.4e-15, beta = 0.31, N = 1257

**YGFCEAADQFHVLDEVR pc3**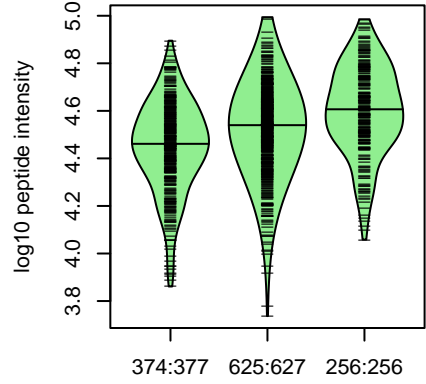

9:139840471:G:T\_G  
 p = 7.4e-25, beta = 0.404, N = 1255

**QLYGDTGVLGR pc2**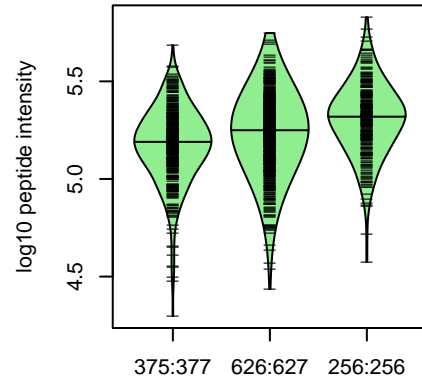

9:139840471:G:T\_G  
 p = 1.9e-18, beta = 0.345, N = 1257

**LDGICWQVR pc2**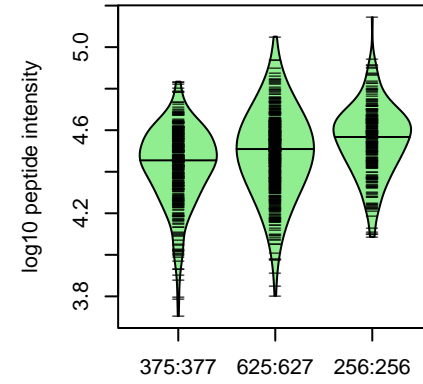

9:139840471:G:T\_G  
 p = 6.8e-18, beta = 0.34, N = 1256

**SLPVSDSVLSGFQR pc2**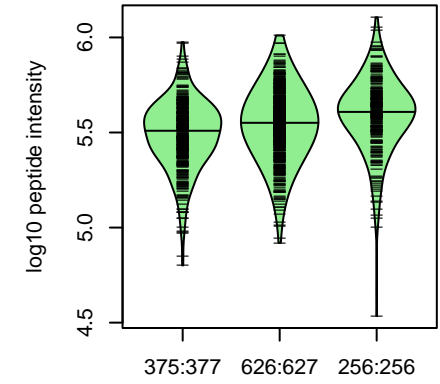

9:139840471:G:T\_G  
 p = 2.6e-14, beta = 0.301, N = 1257

**P07360 NP5**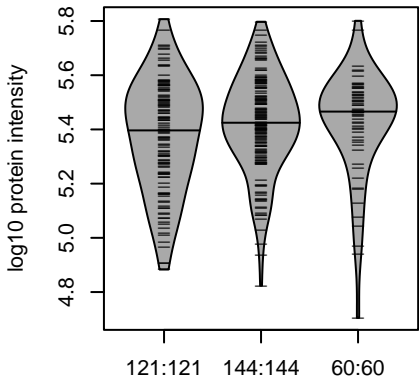

rs7862602  
 p = 0.014, beta = 0.187, N = 325

**YGFCEAADQFHVLDEVR pc3**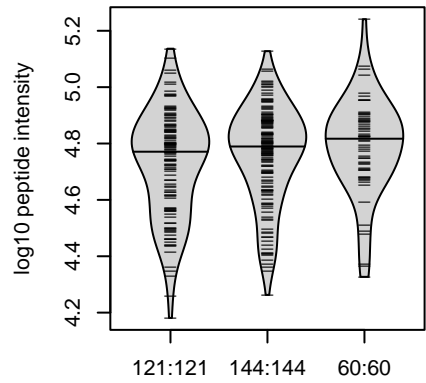

rs7862602  
 p = 0.0039, beta = 0.218, N = 325

**SLPVSDSVLSGFQR pc3**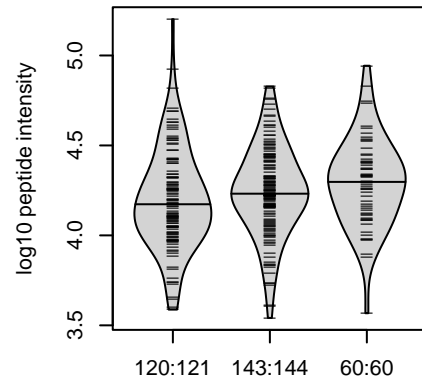

rs7862602  
 p = 0.0042, beta = 0.217, N = 323

**LDGICWQVR pc2**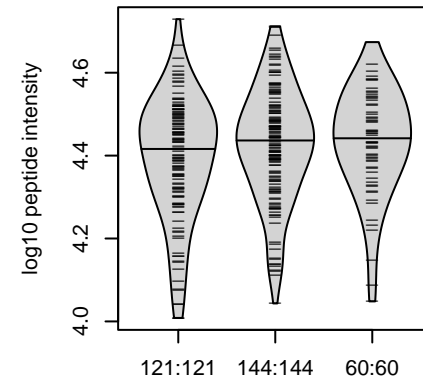

rs7862602  
 p = 0.0072, beta = 0.203, N = 325

**VQEHLTEDQIFYFPK pc3**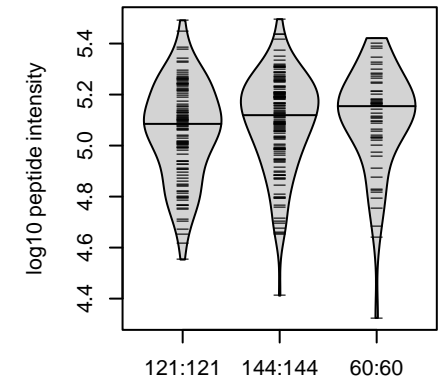

rs7862602  
 p = 0.013, beta = 0.189, N = 325

Locus: 137 (Sort: 161)

Status: Not replicated

80% power: No

SNP: 9:139840471:G:T

rsID: rs7862602

UniProtID: P07360

HGNC gene: C8G

Type: Cis-pQTL



**HLA-A [cis]**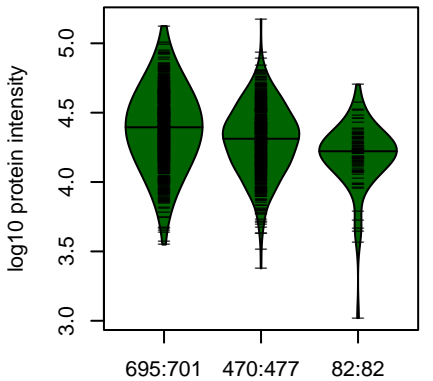

6:31349611:A:G\_A  
 $p = 6e-15$ ,  $\beta = -0.352$ ,  $N = 1247$

**FIAGYVDDTQFVR pc2**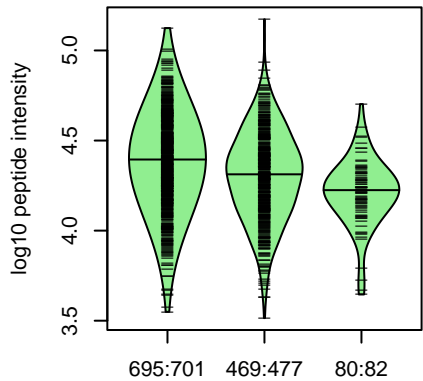

6:31349611:A:G\_A  
 $p = 1.3e-13$ ,  $\beta = -0.336$ ,  $N = 1244$

**DYIALNEDLR pc2**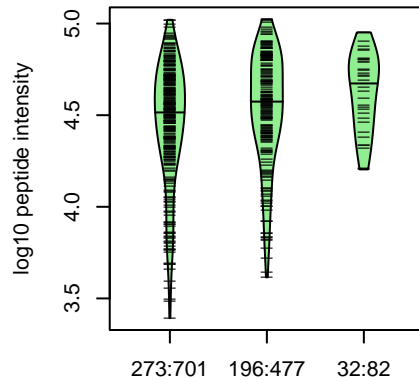

6:31349611:A:G\_A  
 $p = 4.3e-05$ ,  $\beta = 0.293$ ,  $N = 501$

**AYLDGTCVEWLR pc2**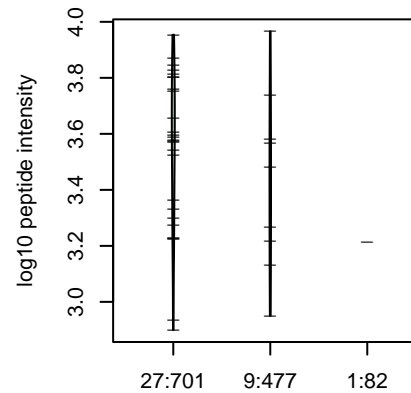

6:31349611:A:G\_A  
 $p = 0.34$ ,  $\beta = -0.291$ ,  $N = 37$

**YTCHVQHEGLPK pc2**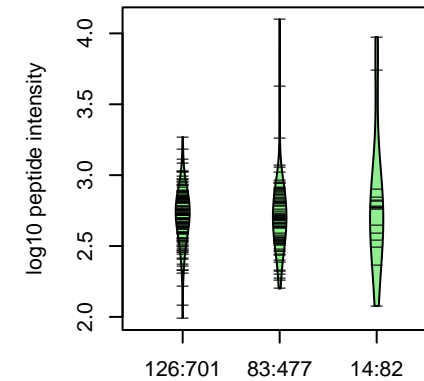

6:31349611:A:G\_A  
 $p = 0.62$ ,  $\beta = -0.0528$ ,  $N = 223$

**Q5SRN5 NP1**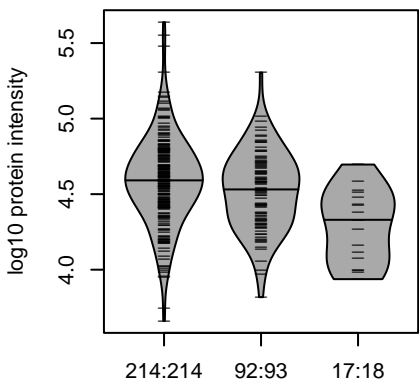

rs9266713  
 $p = 0.004$ ,  $\beta = -0.267$ ,  $N = 323$

**FIAGYVDDTQFVR pc2**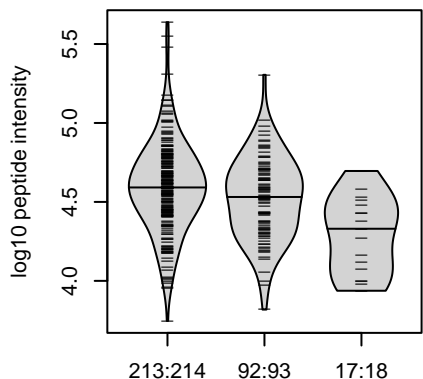

rs9266713  
 $p = 0.0024$ ,  $\beta = -0.283$ ,  $N = 322$

**THMTHHPISDHEATLR pc4**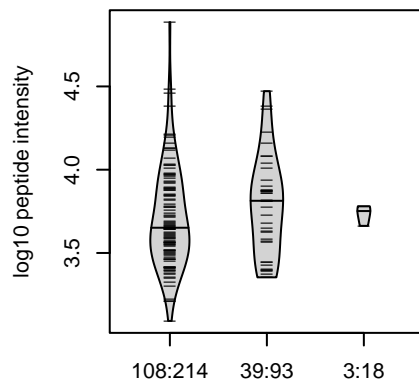

rs9266713  
 $p = 0.17$ ,  $\beta = 0.22$ ,  $N = 150$

**YTCHVQHEGLPK pc3**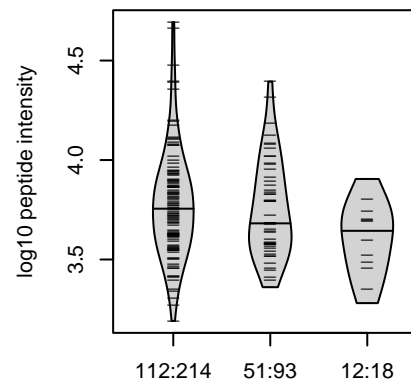

rs9266713  
 $p = 0.29$ ,  $\beta = -0.126$ ,  $N = 175$

**DYIALNEDLR pc2**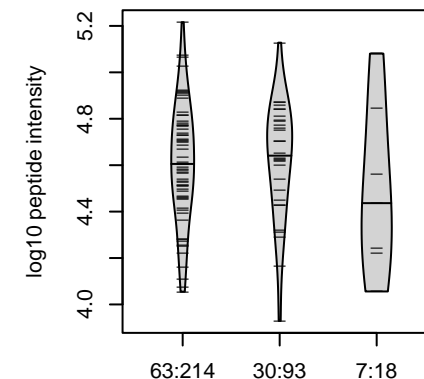

rs9266713  
 $p = 0.76$ ,  $\beta = -0.0482$ ,  $N = 100$

**AQSQTDRLGLTLR pc3  
rs1071742;rs199474457 REF**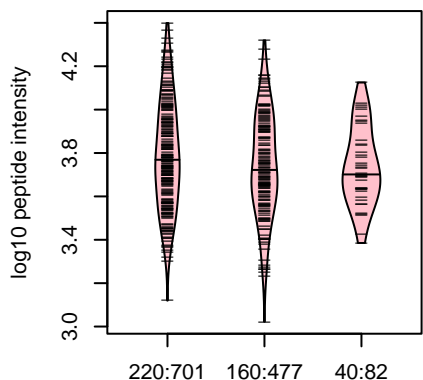

6:31349611:A:G\_A  
 $p = 0.0034$ ,  $\text{model} = \text{DOM}$ ,  $N = 420$

**SWTAADMAAQITQR pc2  
rs1059517 ALT**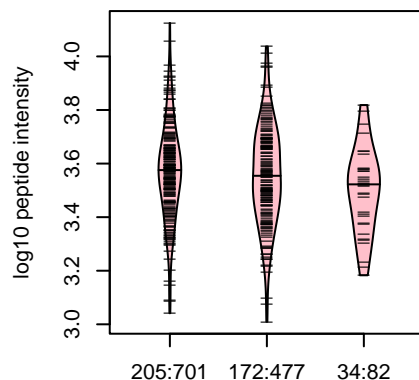

6:31349611:A:G\_A  
 $p = 0.0045$ ,  $\text{model} = \text{REC}$ ,  $N = 411$

**SWTAADMAAQITK pc2  
rs1059517 REF**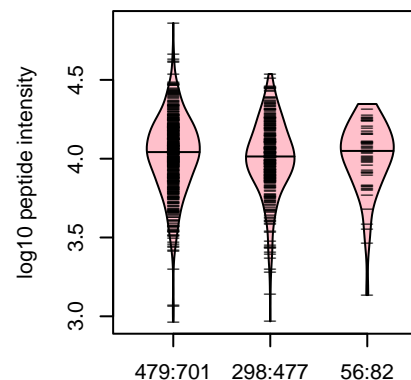

6:31349611:A:G\_A  
 $p = 0.064$ ,  $\text{model} = \text{REC}$ ,  $N = 833$

**FDSDAASQR pc2  
rs707910 REF**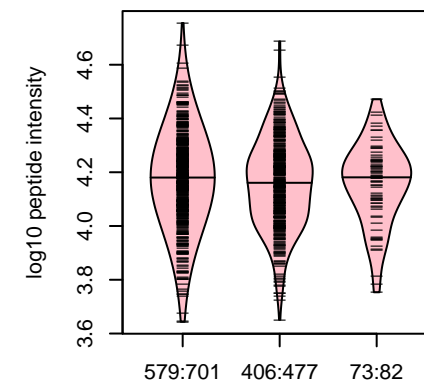

6:31349611:A:G\_A  
 $p = 0.14$ ,  $\text{model} = \text{REC}$ ,  $N = 1058$

Locus: 138 (Sort: 162)  
 Status: Not replicated  
 80% power: No  
 SNP: 6:31349611:A:G  
 rsID: rs9266713  
 UniProtID: Q5SRN5  
 HGNC gene: HLA-A  
 Type: Cis-pQTL

**DIAPH1 [trans]**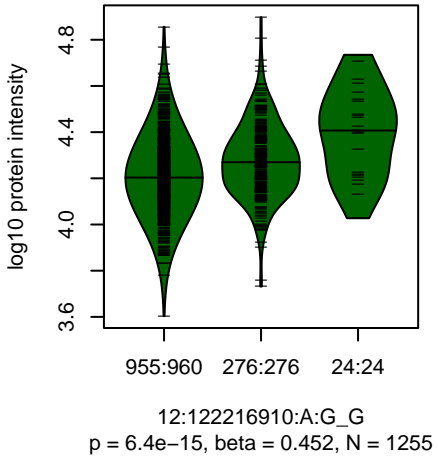**VSAENLQK pc2**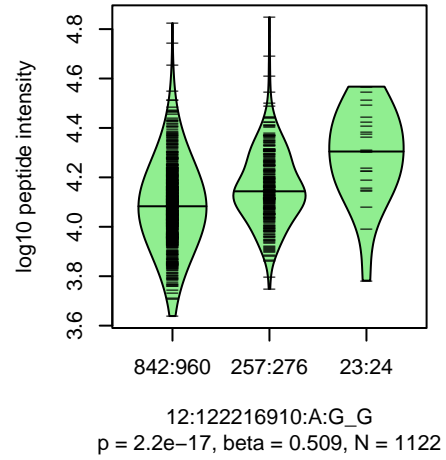**EIENEDMR pc2**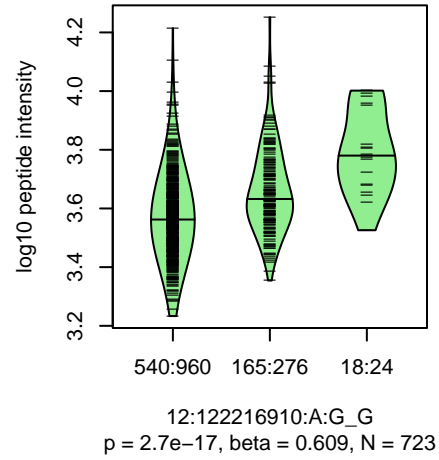**ELGEYFLFDPK pc2**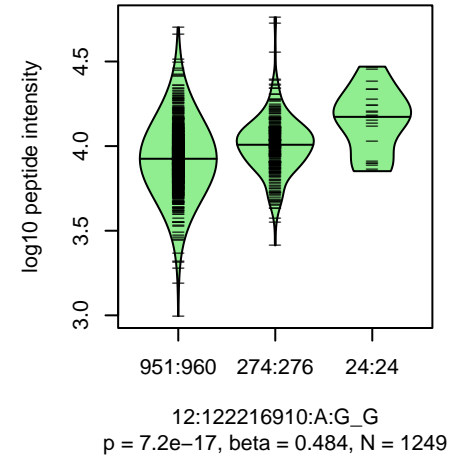**AGCAVTSLLASELTK pc2**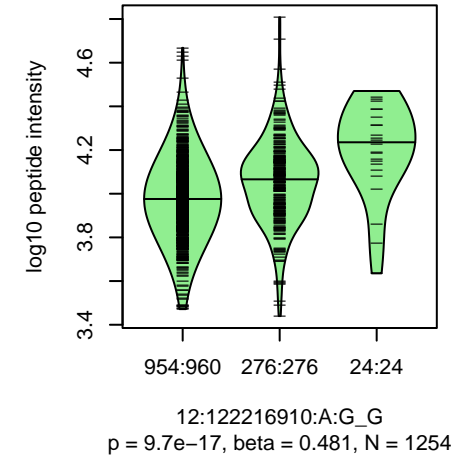**O60610 NP1**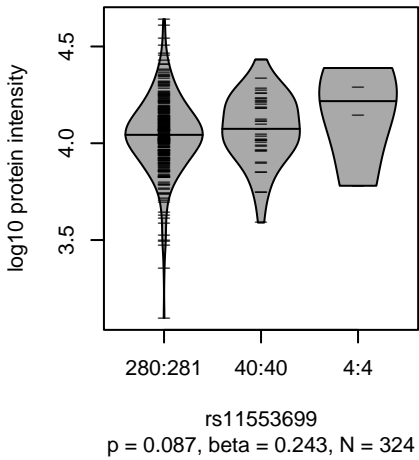**VSAENLQK pc2**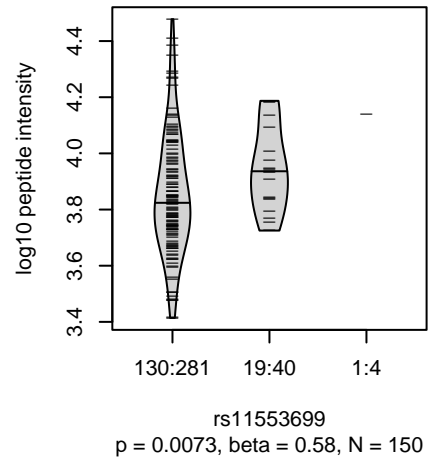**TAQNLSIFLGSFR pc2**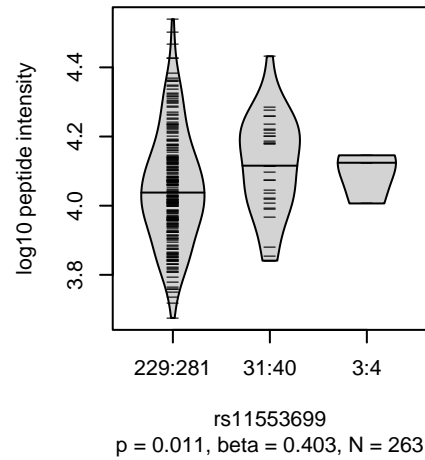**NVILEVNEAVLTESMIQNLIK pc3**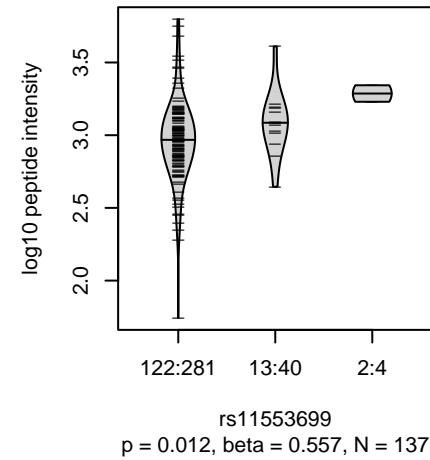**SAMMYIQELR pc2**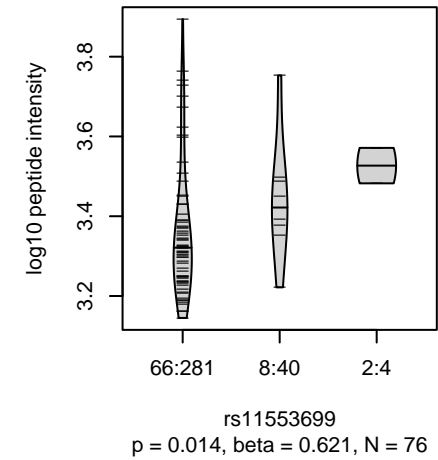

Locus: 139 (Sort: 163)  
 Status: Not replicated  
 80% power: No  
 SNP: 12:122216910:A:G  
 rsID: rs11553699  
 UniProtID: O60610  
 HGNC gene: DIAPH1  
 Type: Trans-pQTL

**PON2 [cis]**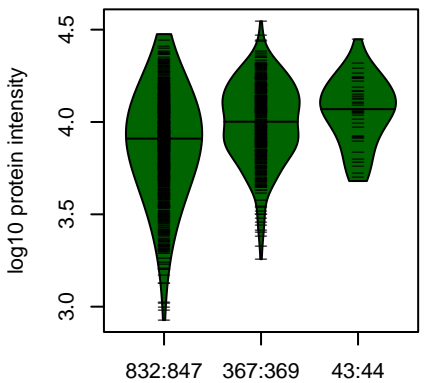

7:95056939:T:C\_C  
 $p = 6.8e-15$ ,  $\beta = 0.396$ ,  $N = 1242$

**YIYVADILAHEIHVLEK pc3**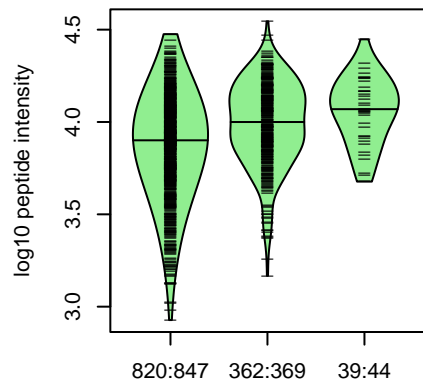

7:95056939:T:C\_C  
 $p = 3.8e-15$ ,  $\beta = 0.408$ ,  $N = 1221$

**EVESVDLPHCHLIK pc3**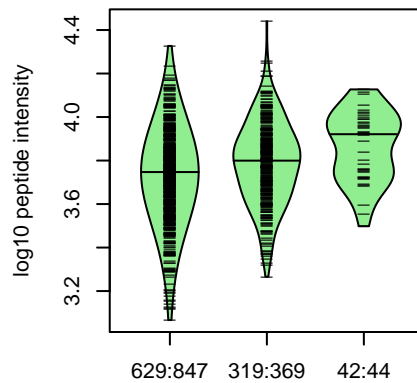

7:95056939:T:C\_C  
 $p = 6.1e-08$ ,  $\beta = 0.298$ ,  $N = 990$

**LFVYDPNPPSSEVLR pc2**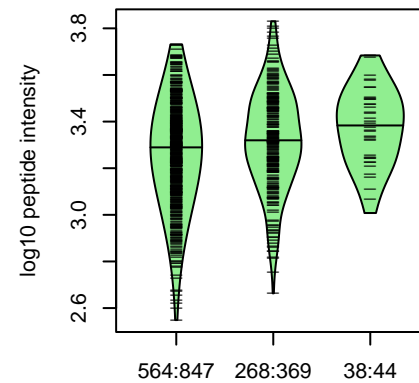

7:95056939:T:C\_C  
 $p = 2.8e-05$ ,  $\beta = 0.246$ ,  $N = 870$

**LLIGTLYHR pc2**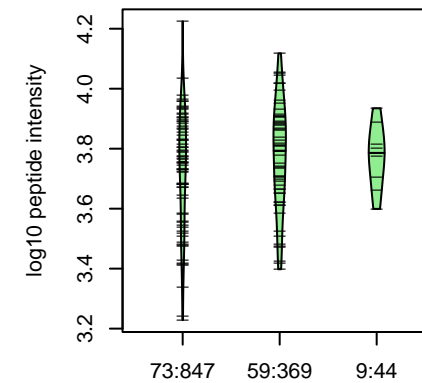

7:95056939:T:C\_C  
 $p = 0.15$ ,  $\beta = 0.193$ ,  $N = 141$

**A0A0J9YXF2 NP5**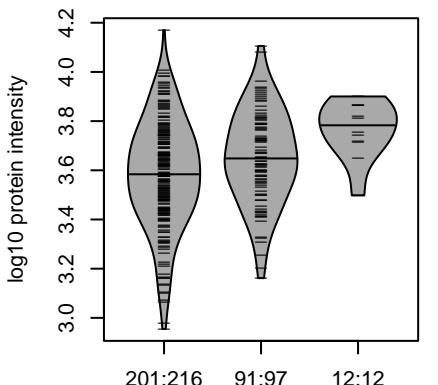

rs10259688  
 $p = 0.00016$ ,  $\beta = 0.376$ ,  $N = 304$

**YIYVADILAHEIHVLEK pc3**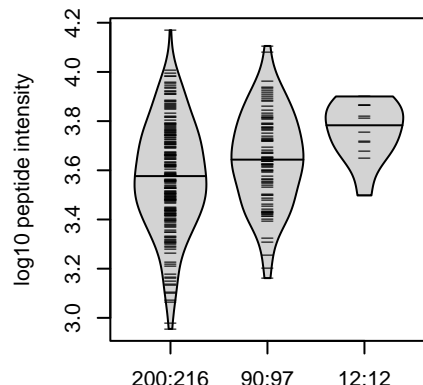

rs10259688  
 $p = 9.7e-05$ ,  $\beta = 0.39$ ,  $N = 302$

**LFVYDPNPPSSEVLR pc2**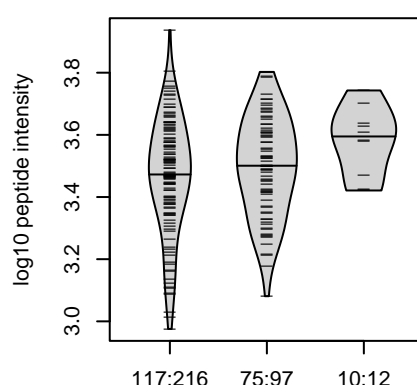

rs10259688  
 $p = 0.011$ ,  $\beta = 0.295$ ,  $N = 202$

**FEEAENSLHLK pc3  
rs12026 REF**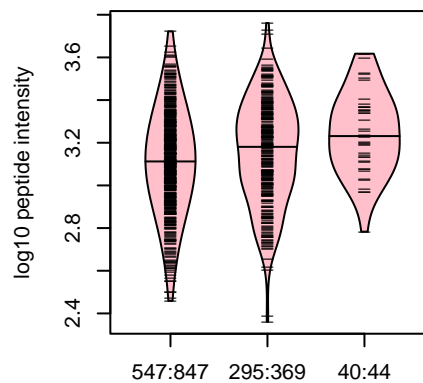

7:95056939:T:C\_C  
 $p = 9.3e-10$ ,  $\text{model} = \text{REC}$ ,  $N = 882$

**IQNILSEK pc2  
rs7493 REF**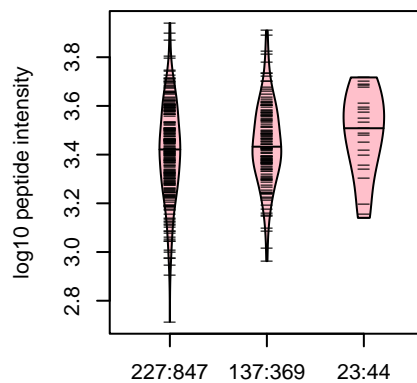

7:95056939:T:C\_C  
 $p = 2.3e-05$ ,  $\text{model} = \text{REC}$ ,  $N = 387$

Locus: 140 (Sort: 164)

Status: Replicated

80% power: No

SNP: 7:95056939:T:C

rsID: rs10259688

UniProtID: A0A0J9YXF2

HGNC gene: PON2

Type: Cis-pQTL

**CFHR4 [cis]**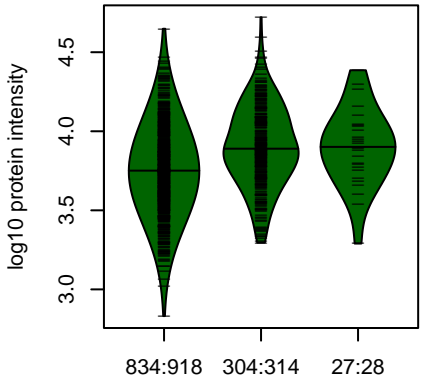

1:196886223:C:T\_T  
 $p = 1.4e-14$ ,  $\beta = 0.436$ ,  $N = 1165$

**FCDMPVFENSR pc2**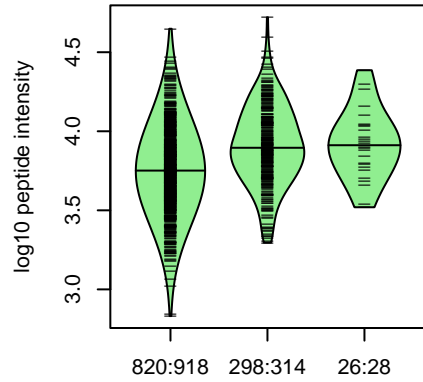

1:196886223:C:T\_T  
 $p = 6.7e-16$ ,  $\beta = 0.462$ ,  $N = 1144$

**VYLPWSR pc2**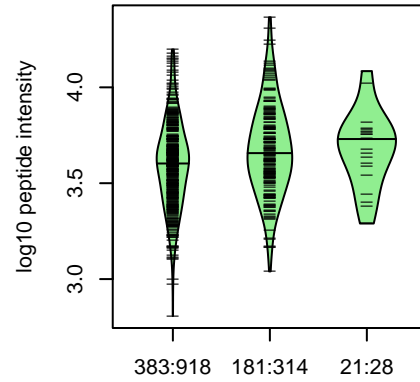

1:196886223:C:T\_T  
 $p = 0.00047$ ,  $\beta = 0.257$ ,  $N = 585$

**CIHPCIITEENMNK pc3**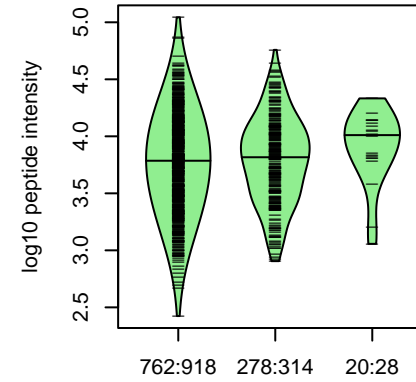

1:196886223:C:T\_T  
 $p = 0.23$ ,  $\beta = 0.0736$ ,  $N = 1060$

**EGIVEYPR pc2**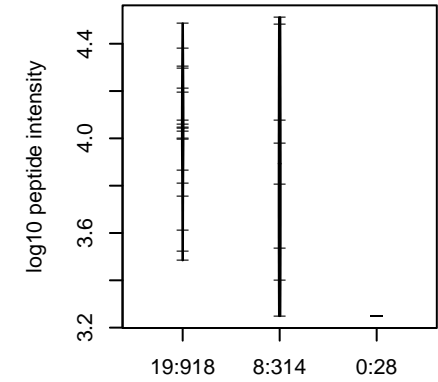

1:196886223:C:T\_T  
 $p = 0.25$ ,  $\beta = -0.453$ ,  $N = 27$

**Q92496 NP5**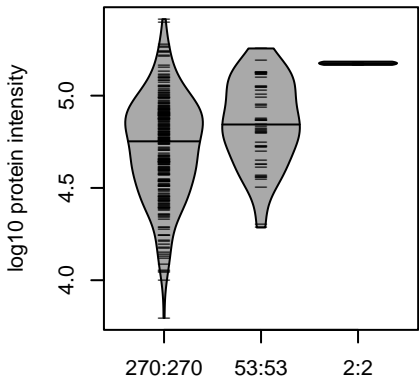

rs61818956  
 $p = 0.00094$ ,  $\beta = 0.451$ ,  $N = 325$

**FCDMPVFENSR pc2**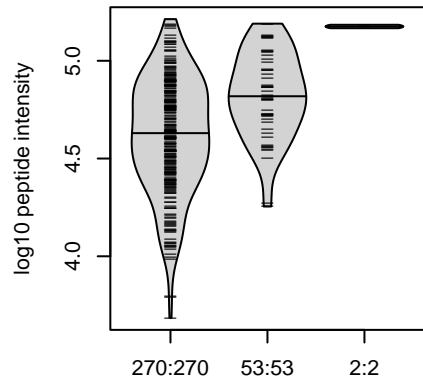

rs61818956  
 $p = 1.6e-06$ ,  $\beta = 0.652$ ,  $N = 325$

**VEYQCQSYELQGSK pc2**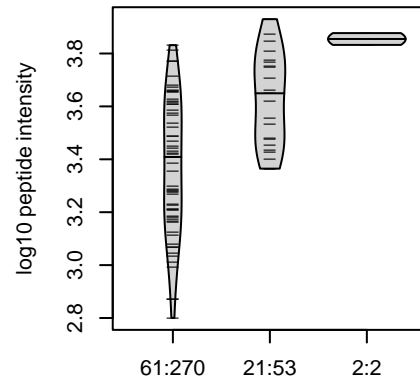

rs61818956  
 $p = 3.9e-05$ ,  $\beta = 0.816$ ,  $N = 84$

**PCEFPEIQHGHLIYENTR pc4**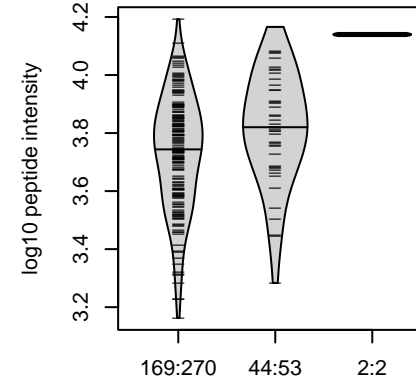

rs61818956  
 $p = 0.002$ ,  $\beta = 0.468$ ,  $N = 215$

**YVTCNSGDWSEPPR pc2**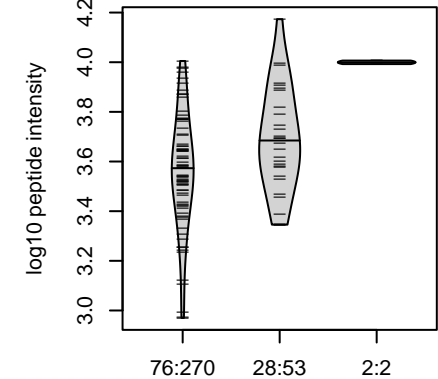

rs61818956  
 $p = 0.0045$ ,  $\beta = 0.528$ ,  $N = 106$

Locus: 141 (Sort: 165)

Status: Not replicated

80% power: No

SNP: 1:196886223:C:T

rsID: rs61818956

UniProtID: Q92496

HGNC gene: CFHR4

Type: Cis-pQTL

**GALC [cis]**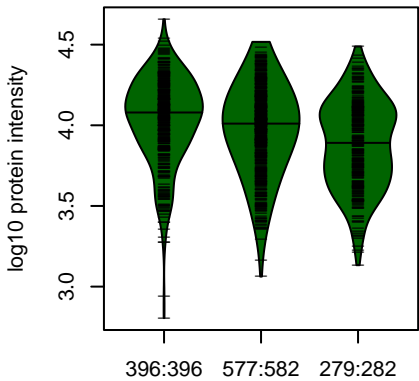

396:396 577:582 279:282  
 14:88360524:C:T\_T  
 $p = 1.4e-14$ ,  $\beta = -0.294$ ,  $N = 1252$

**SLWTDIPVNF PK pc2**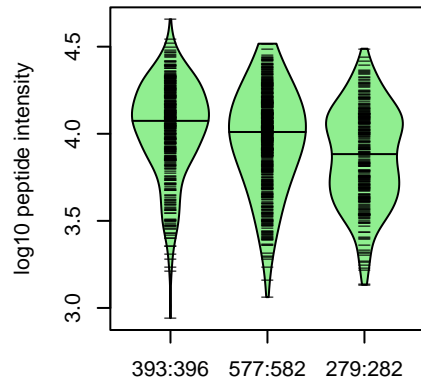

393:396 577:582 279:282  
 14:88360524:C:T\_T  
 $p = 8.5e-15$ ,  $\beta = -0.297$ ,  $N = 1249$

**GYEWWLMK pc2**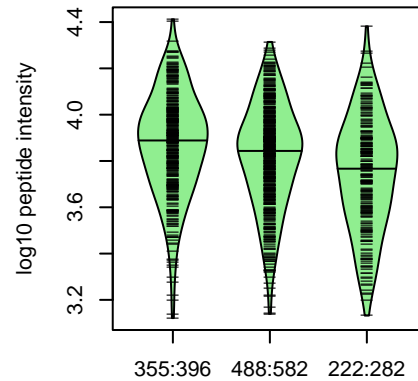

355:396 488:582 222:282  
 14:88360524:C:T\_T  
 $p = 2.5e-11$ ,  $\beta = -0.278$ ,  $N = 1065$

**GSFSEIPELQVWYTK pc2**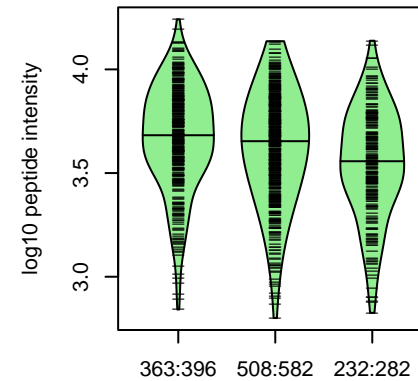

363:396 508:582 232:282  
 14:88360524:C:T\_T  
 $p = 2.5e-08$ ,  $\beta = -0.229$ ,  $N = 1103$

**VTGDLAGWIIYALGRVEVTAK pc3**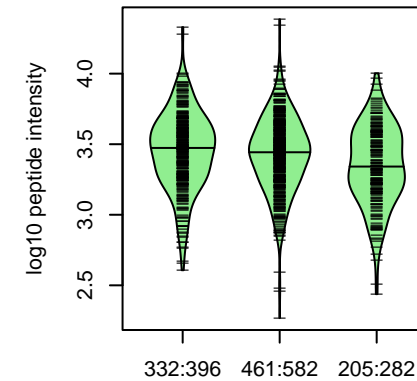

332:396 461:582 205:282  
 14:88360524:C:T\_T  
 $p = 4e-07$ ,  $\beta = -0.22$ ,  $N = 998$

**P54803 NP5**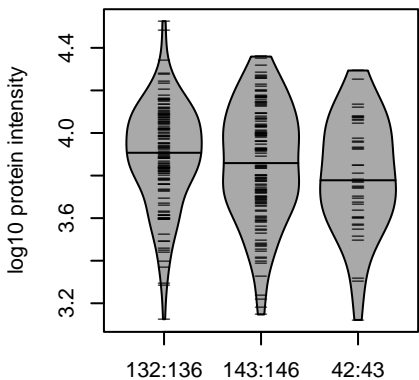

132:136 143:146 42:43  
 rs17684213  
 $p = 0.2$ ,  $\beta = -0.104$ ,  $N = 317$

**SLWTDIPVNF PK pc2**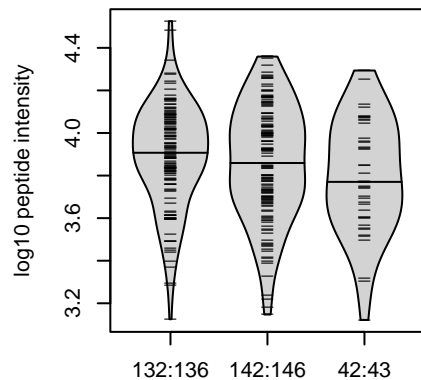

132:136 142:146 42:43  
 rs17684213  
 $p = 0.21$ ,  $\beta = -0.101$ ,  $N = 316$

**EFDGIGAVSGGGATSR pc2**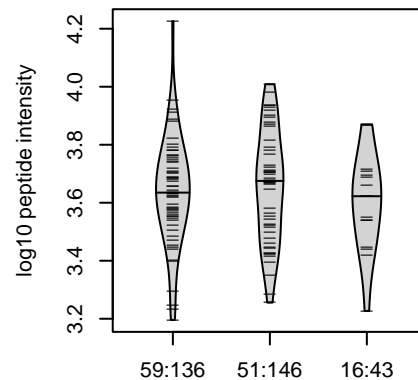

59:136 51:146 16:43  
 rs17684213  
 $p = 0.23$ ,  $\beta = -0.152$ ,  $N = 126$

**VTGDLAGWIIYALGRVEVTAK pc3EIGGDGQTTDGTESHPHMHYALDENYF**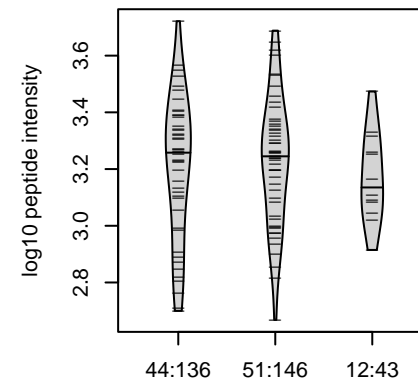

44:136 51:146 12:43  
 rs17684213  
 $p = 0.36$ ,  $\beta = -0.131$ ,  $N = 107$

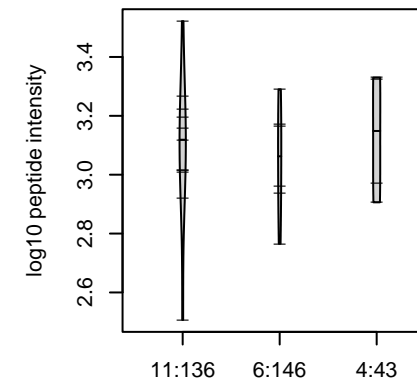

11:136 6:146 4:43  
 rs17684213  
 $p = 0.46$ ,  $\beta = 0.193$ ,  $N = 21$

**VVNVIGAHYPGTHSAK pc3  
rs34362748 ALT**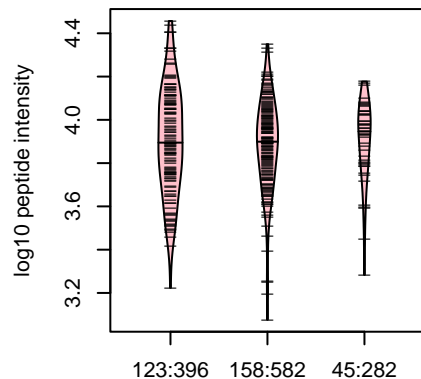

123:396 158:582 45:282  
 14:88360524:C:T\_T  
 $p = 9.9e-06$ ,  $\text{model} = \text{DOM}$ ,  $N = 326$

**VVDVIGAHYPGTHSAK pc4  
rs34362748 REF**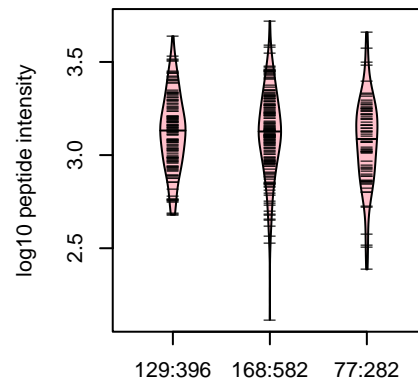

129:396 168:582 77:282  
 14:88360524:C:T\_T  
 $p = 0.14$ ,  $\text{model} = \text{REC}$ ,  $N = 374$

Locus: 142 (Sort: 166)  
 Status: Not replicated  
 80% power: No  
 SNP: 14:88360524:C:T  
 rsID: rs17684213  
 UniProtID: P54803  
 HGNC gene: GALC  
 Type: Cis-pQTL

**IGKV1-17 [cis]**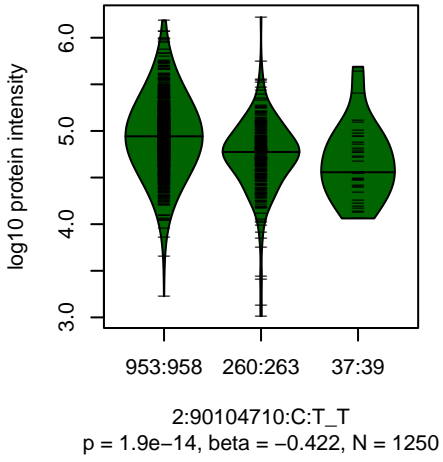**NDLGWYQQK pc2**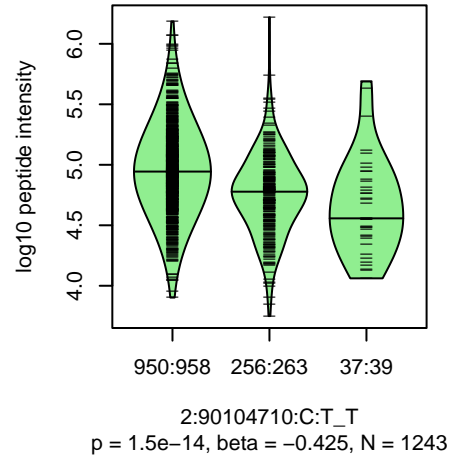**LIYAASSLQSGVPSR pc2**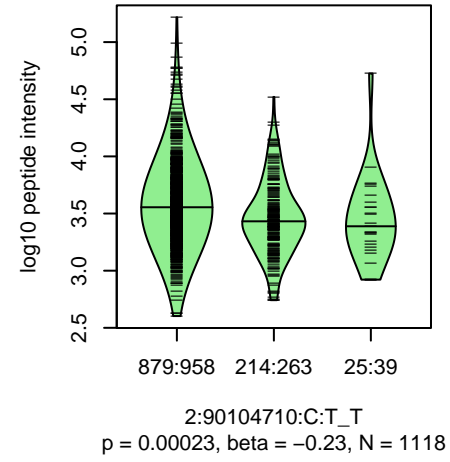**P01599 NP3**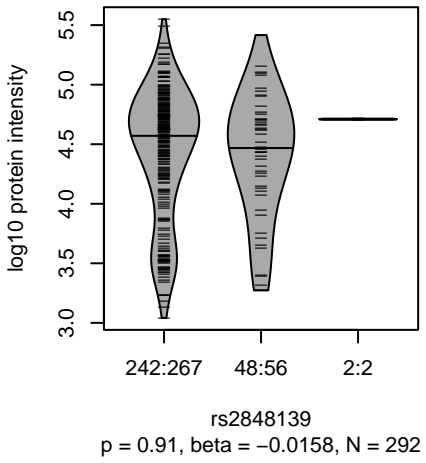**NDLGWYQQK pc2**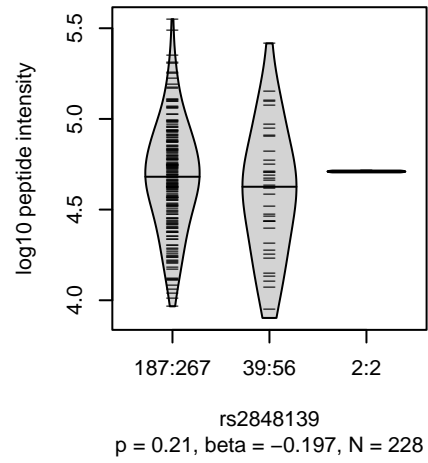**LIYAASSLQSGVPSR pc2**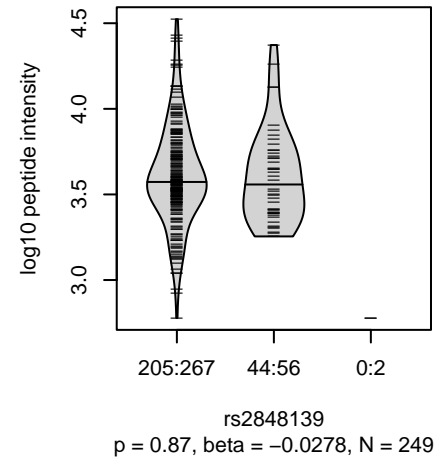

Locus: 143 (Sort: 167)

Status: Not replicated

80% power: No

SNP: 2:90104710:C:T

rsID: rs2848139

UniProtID: P01599

HGNC gene: IGKV1-17

Type: Cis-pQTL

**MAN2A2 [cis]**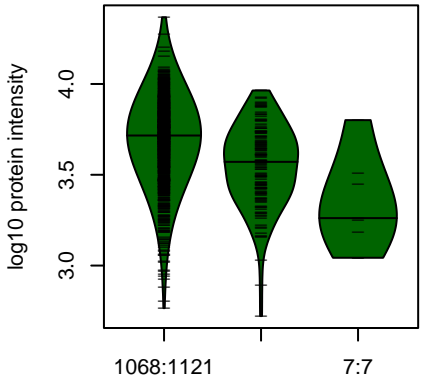

15:91466158:G:A\_A  
 $p = 2e-14$ ,  $\beta = -0.642$ ,  $N = 1201$

**MQLPGPLR pc2**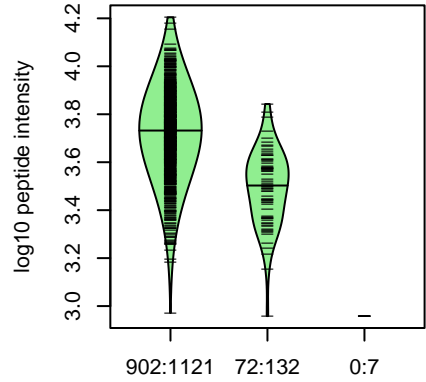

15:91466158:G:A\_A  
 $p = 3.2e-22$ ,  $\beta = -1.15$ ,  $N = 974$

**SFHPLASSLPcdfHLLNLR pc4**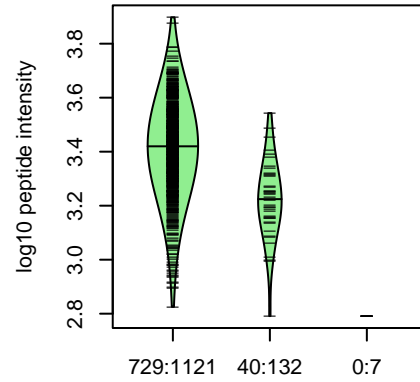

15:91466158:G:A\_A  
 $p = 3.3e-10$ ,  $\beta = -1$ ,  $N = 769$

**AITEANVAER pc2**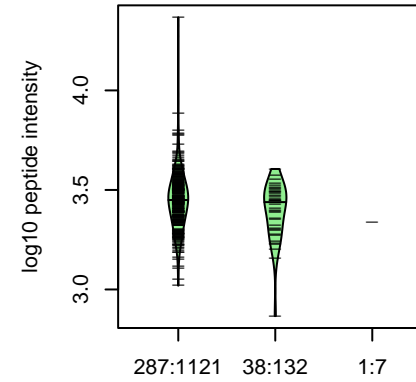

15:91466158:G:A\_A  
 $p = 0.038$ ,  $\beta = -0.336$ ,  $N = 326$

**LTLHTAQUALGVSSLK pc3**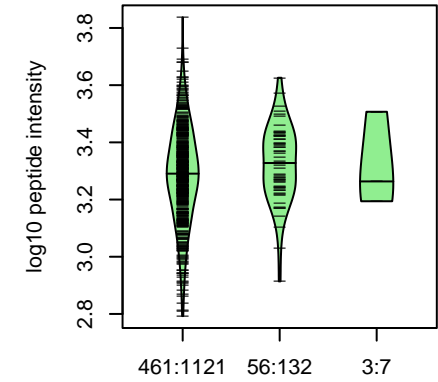

15:91466158:G:A\_A  
 $p = 0.062$ ,  $\beta = 0.237$ ,  $N = 520$

**P49641 NP5**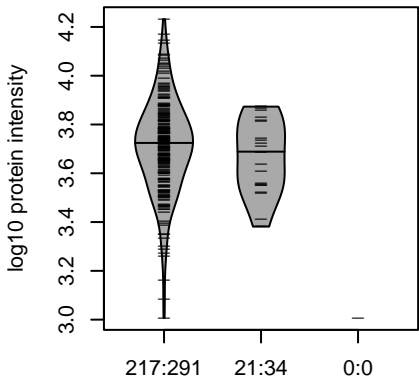

rs71407348  
 $p = 0.23$ ,  $\beta = -0.27$ ,  $N = 238$

**AALLDQYR pc2**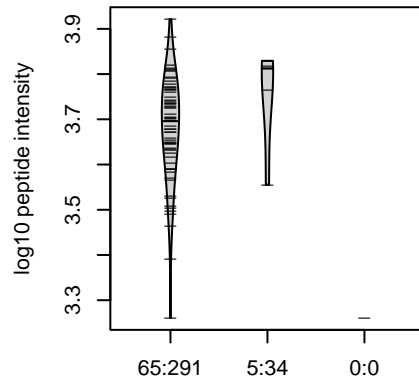

rs71407348  
 $p = 0.31$ ,  $\beta = 0.453$ ,  $N = 70$

**MQLPGPLR pc2**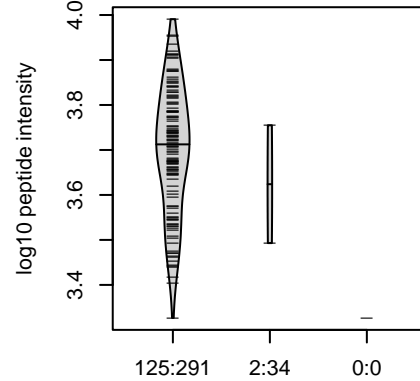

rs71407348  
 $p = 0.31$ ,  $\beta = -0.701$ ,  $N = 127$

**TLQAEEDTLPSAETALILHR pc3**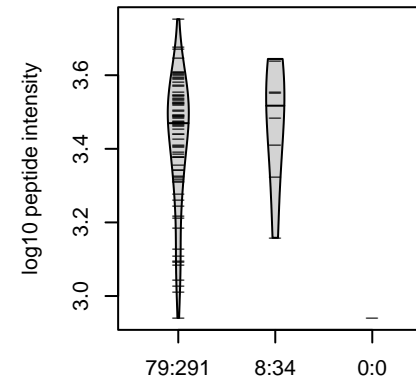

rs71407348  
 $p = 0.39$ ,  $\beta = 0.306$ ,  $N = 87$

**GAEVLYSLAAAHAR pc2**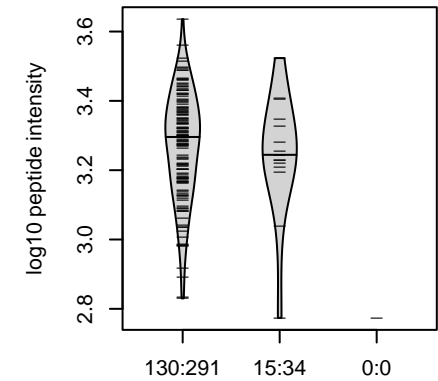

rs71407348  
 $p = 0.54$ ,  $\beta = -0.162$ ,  $N = 145$

Locus: 144 (Sort: 168)  
 Status: Not replicated  
 80% power: No  
 SNP: 15:91466158:G:A  
 rsID: rs71407348  
 UniProtID: P49641  
 HGNC gene: MAN2A2  
 Type: Cis-pQTL

**FN3K [cis]**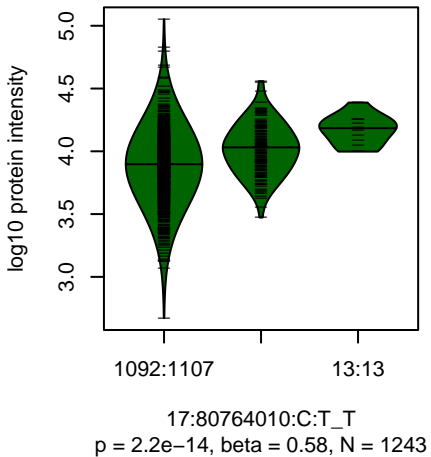**VIDLPGGGAAFVMEHLK pc3**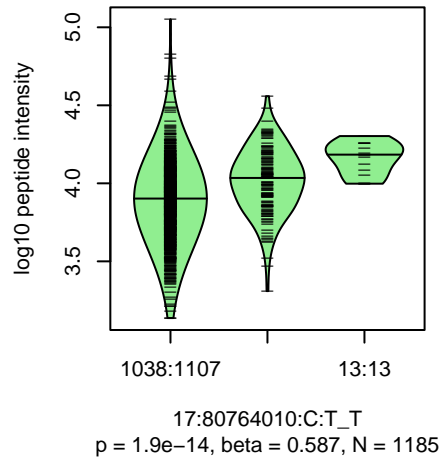**AYDTDAGPVFVK pc2**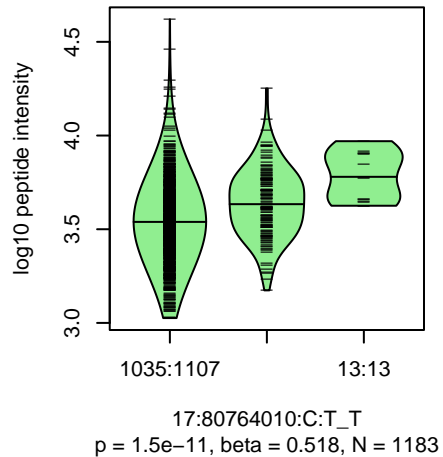**QMFEGEVASLEALR pc2**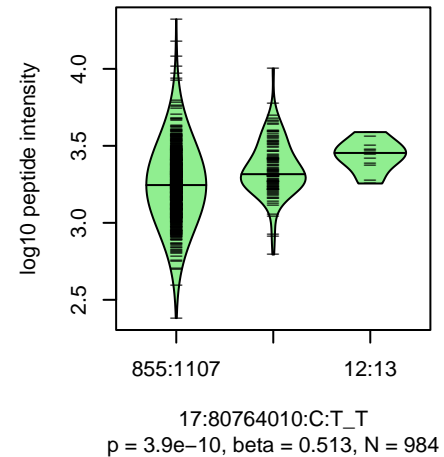**SPSLGTMR pc2**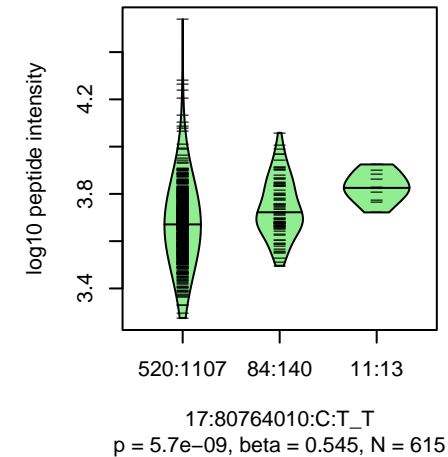**Q9H479 NP1**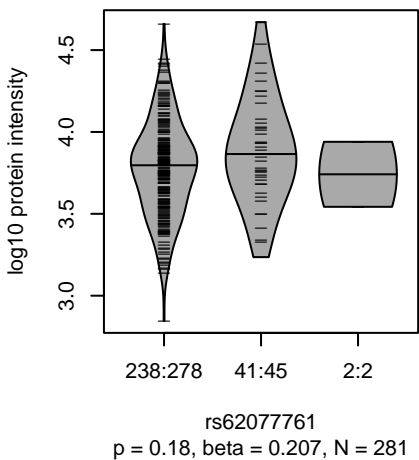**QMFEGEVASLEALR pc2**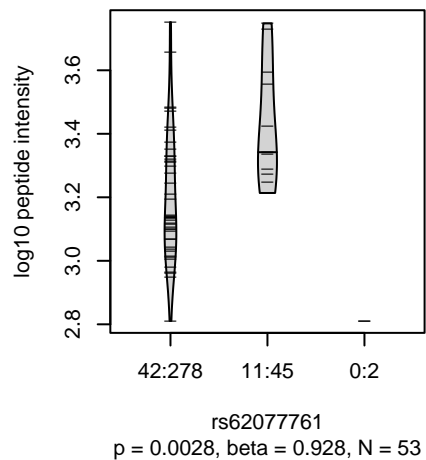**SPSLGTMR pc2**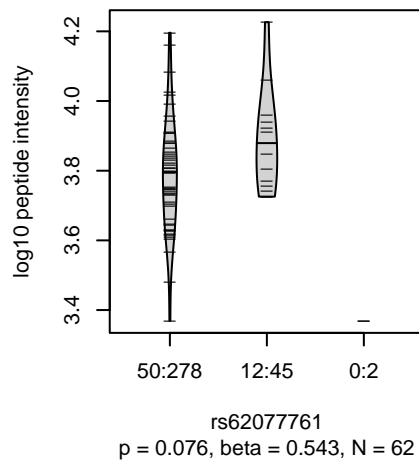**AYDTDAGPVFVK pc2**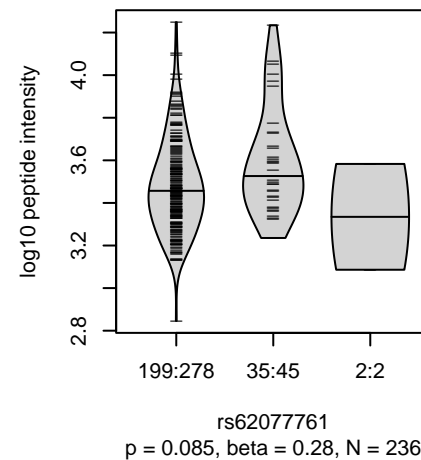**VIDLPGGGAAFVMEHLK pc3**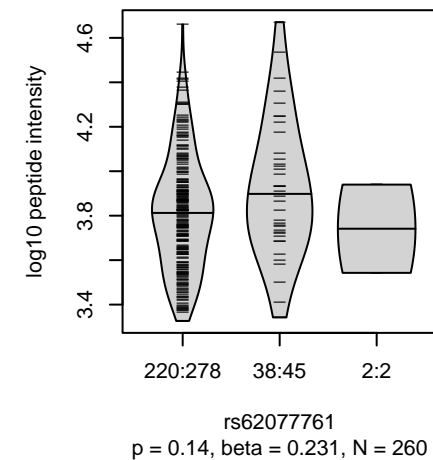

Locus: 145 (Sort: 169)  
 Status: Not replicated  
 80% power: No  
 SNP: 17:80764010:C:T  
 rsID: rs62077761  
 UniProtID: Q9H479  
 HGNC gene: FN3K  
 Type: Cis-pQTL



**DEFA1 [trans]**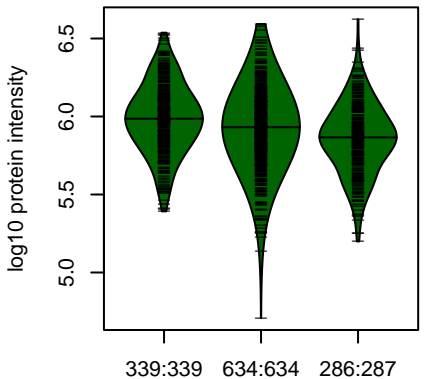

17:26694861:G:A\_G  
 $p = 9.2e-13$ ,  $\beta = -0.282$ ,  $N = 1259$

**YGTCIYQGR pc2**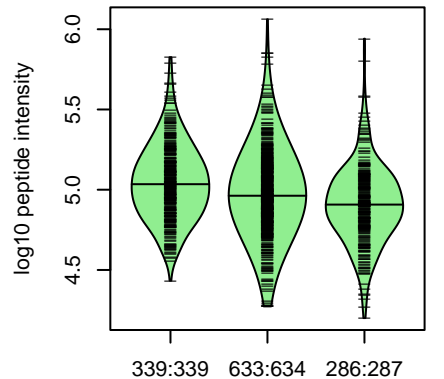

17:26694861:G:A\_G  
 $p = 2.3e-13$ ,  $\beta = -0.289$ ,  $N = 1258$

**IPACIAGER pc2**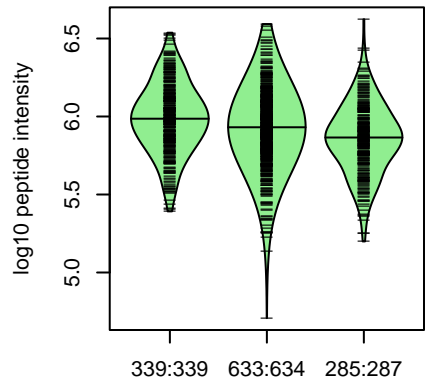

17:26694861:G:A\_G  
 $p = 9.2e-13$ ,  $\beta = -0.282$ ,  $N = 1257$

**IPACIAGER pc2**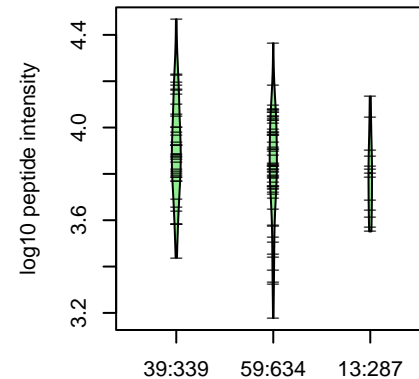

17:26694861:G:A\_G  
 $p = 0.012$ ,  $\beta = -0.357$ ,  $N = 111$

**NMACYCR pc2**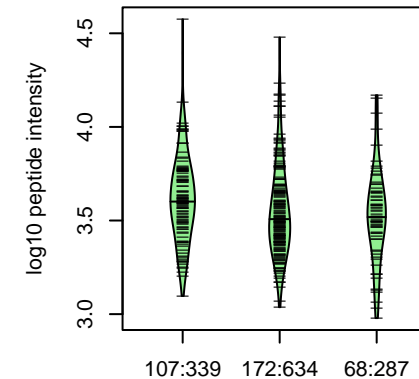

17:26694861:G:A\_G  
 $p = 0.045$ ,  $\beta = -0.151$ ,  $N = 347$

**P59665 NP4**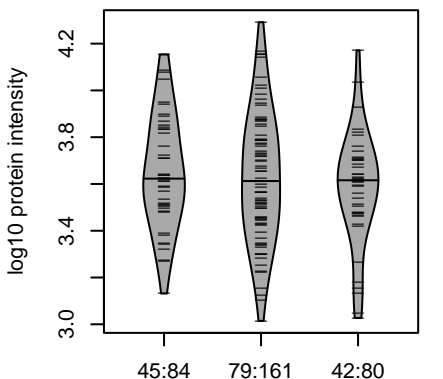

rs704  
 $p = 0.97$ ,  $\beta = -0.00295$ ,  $N = 281$

**AYDTDAGPVFVK pc2**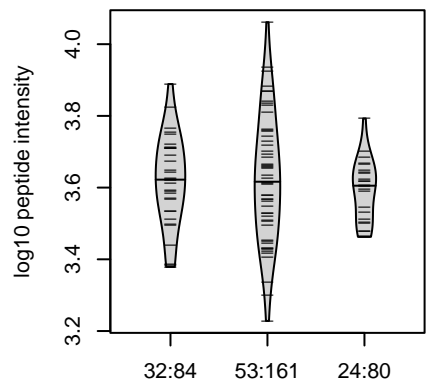

rs704  
 $p = 0.7$ ,  $\beta = -0.0502$ ,  $N = 109$

**AFGGPGAGCISEGR pc2**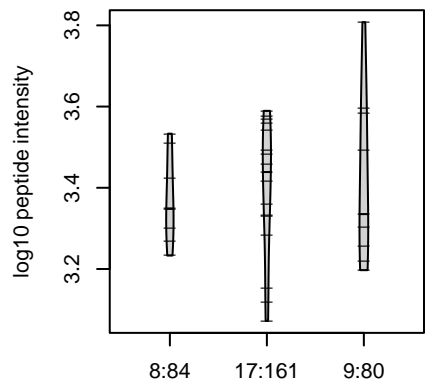

rs704  
 $p = 0.73$ ,  $\beta = 0.0779$ ,  $N = 34$

**LQAQLDIEK pc2**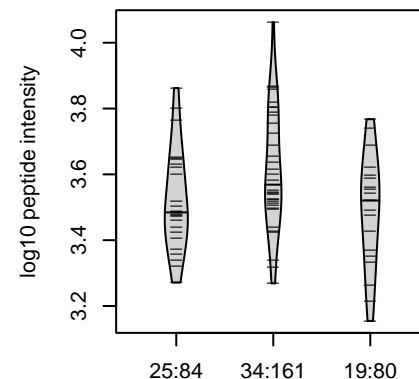

rs704  
 $p = 0.83$ ,  $\beta = -0.0315$ ,  $N = 78$

**VIDLPGGGAAFVMEHLK pc3**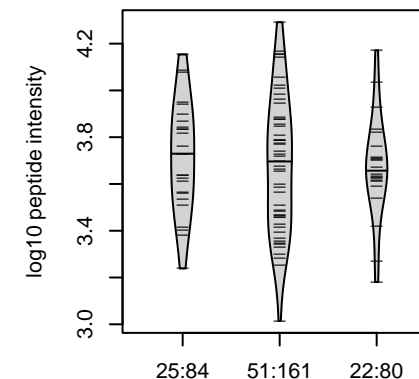

rs704  
 $p = 0.84$ ,  $\beta = -0.0279$ ,  $N = 98$

Locus: 146 (Sort: 170)

Status: Not replicated

80% power: No

SNP: 17:26694861:G:A

rsID: rs704

UniProtID: P59665

HGNC gene: DEFA1

Type: Trans-pQTL

**GPR116 [trans]**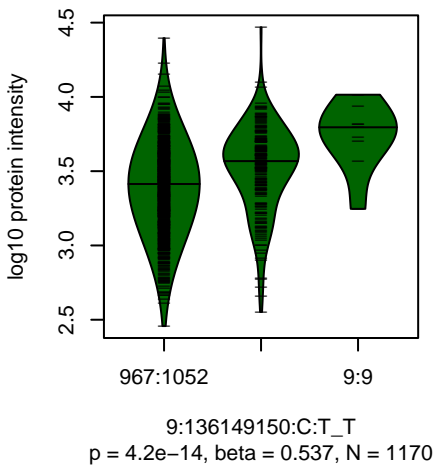**DVIVHPLPLK pc2**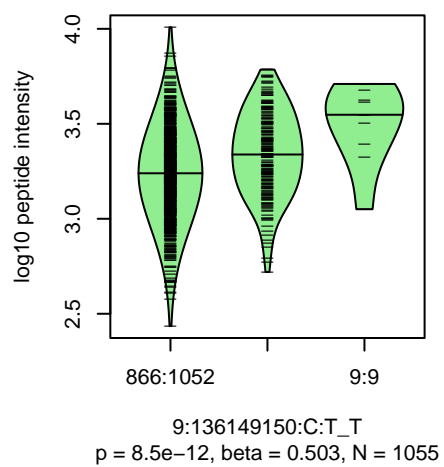**LNIMVDPLEATVSCSGSHHIK pc4**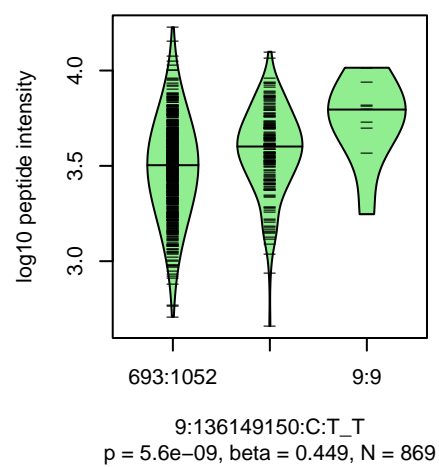**LILDIFEYECK pc2**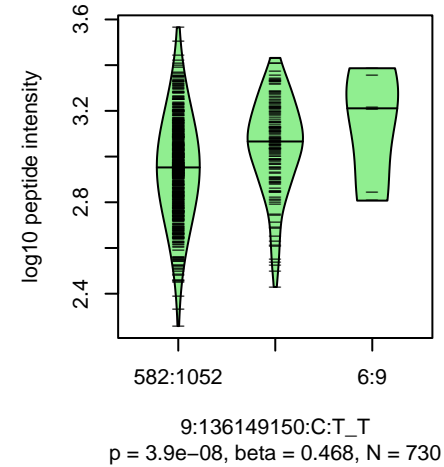**KIDVMPIQILANEEMK pc3**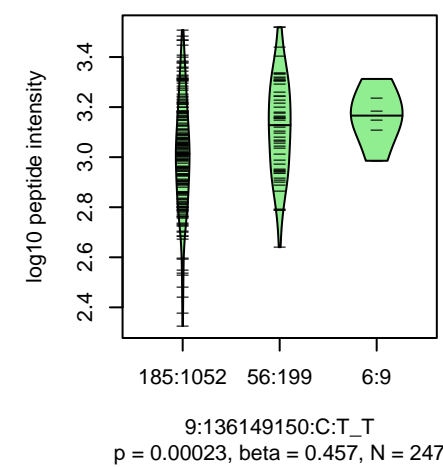**Q8IZF2 NP2**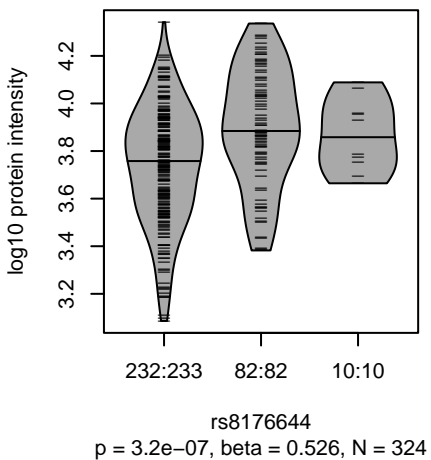**LNIMVDPLEATVSCSGSHHIK pc4**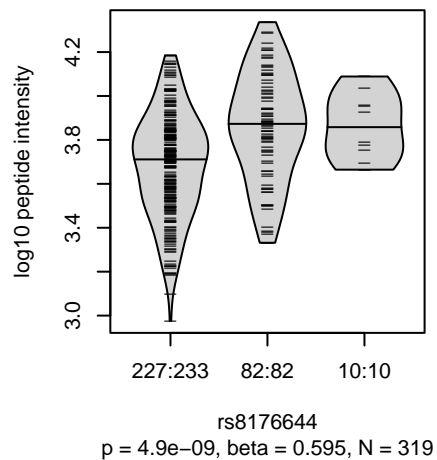**DVIVHPLPLK pc2**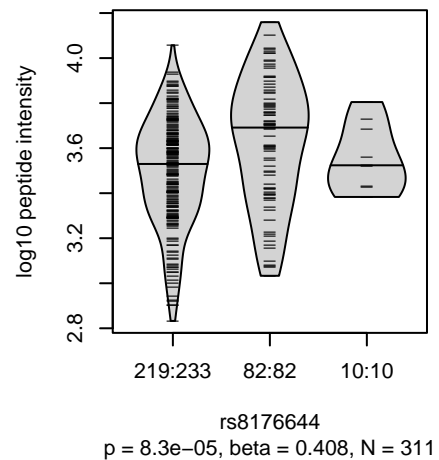**LILDIFEYECK pc2**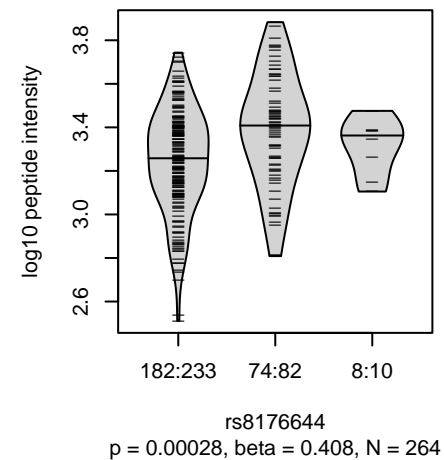**CVGSQWEEK pc2**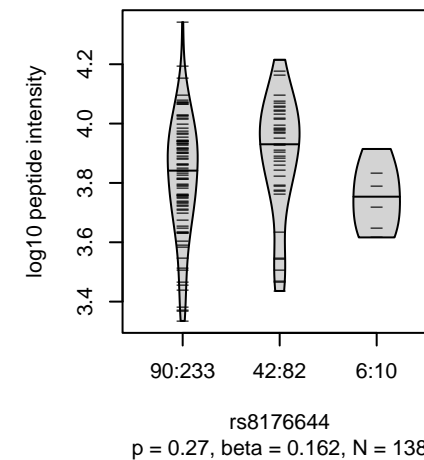**VTFHMGSSSLPAAK pc3  
rs586024 ALT**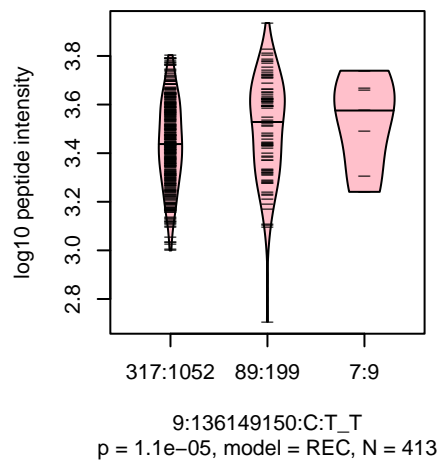

Locus: 147 (Sort: 171)  
Status: Replicated  
80% power: No  
SNP: 9:136149150:C:T  
rsID: rs8176644  
UniProtID: Q8IZF2  
HGNC gene: GPR116  
Type: Trans-pQTL

**SERPINA10 [trans]**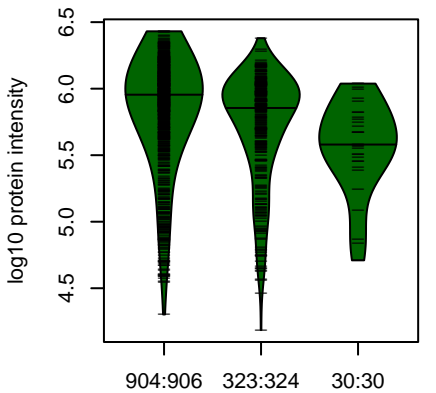

13:113813853:A:G\_G  
 $p = 5.3e-14$ ,  $\beta = -0.41$ ,  $N = 1257$

**YEMHELLR pc2**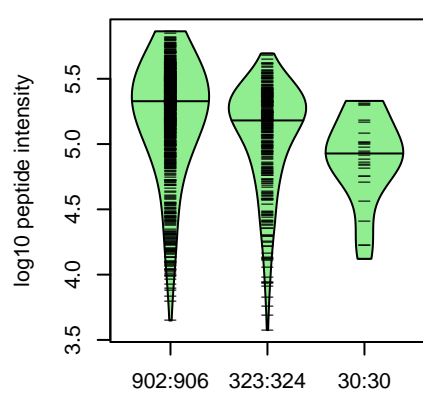

13:113813853:A:G\_G  
 $p = 3e-16$ ,  $\beta = -0.445$ ,  $N = 1255$

**LMNHYINK pc2**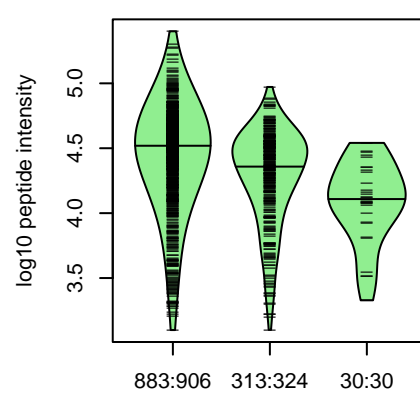

13:113813853:A:G\_G  
 $p = 4e-16$ ,  $\beta = -0.447$ ,  $N = 1226$

**LILVDYILFK pc2**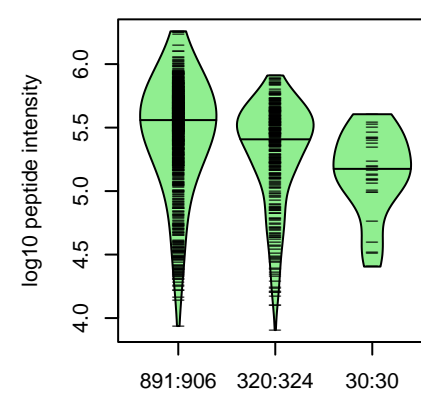

13:113813853:A:G\_G  
 $p = 2e-15$ ,  $\beta = -0.434$ ,  $N = 1241$

**ETSNFGFSLLR pc2**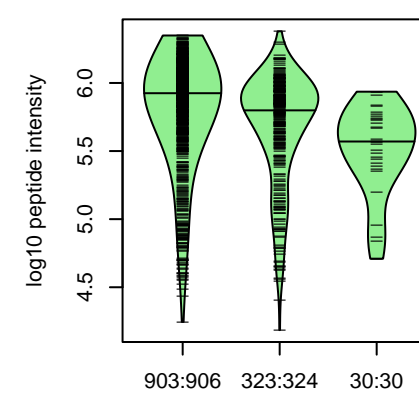

13:113813853:A:G\_G  
 $p = 2.1e-15$ ,  $\beta = -0.432$ ,  $N = 1256$

**G3V2W1 NP2**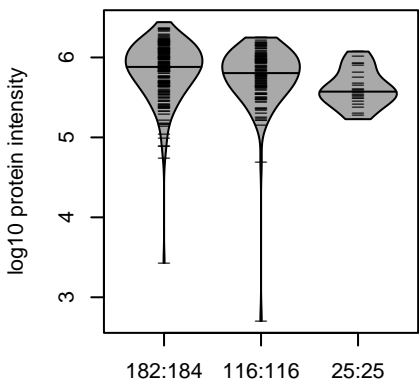

rs3024718  
 $p = 0.0088$ ,  $\beta = -0.226$ ,  $N = 323$

**VPMMYGAGK pc2**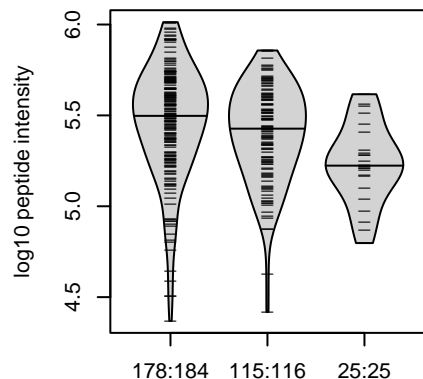

rs3024718  
 $p = 0.0012$ ,  $\beta = -0.279$ ,  $N = 318$

**GTEAVAGILSEITAYSMPPVIK pc3**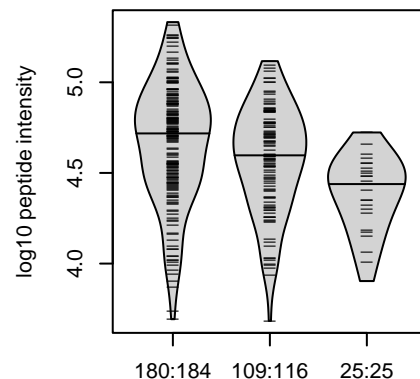

rs3024718  
 $p = 0.0017$ ,  $\beta = -0.271$ ,  $N = 314$

**LMNHYINK pc2**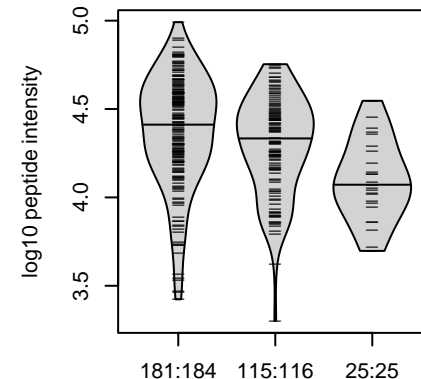

rs3024718  
 $p = 0.0018$ ,  $\beta = -0.268$ ,  $N = 321$

**LILVDYILFK pc2**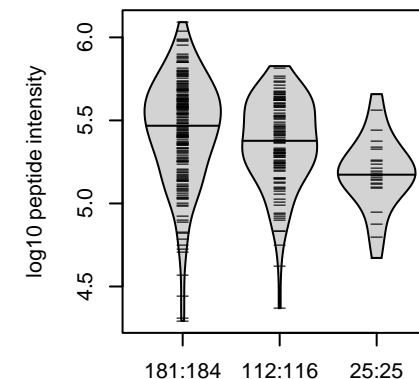

rs3024718  
 $p = 0.0019$ ,  $\beta = -0.268$ ,  $N = 318$

**NLELGLSQGSFAFIHK pc3  
rs2232700 ALT**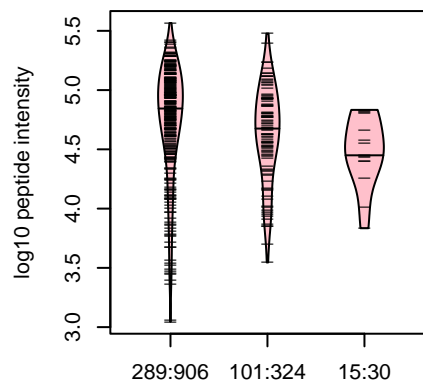

13:113813853:A:G\_G  
 $p = 0.046$ ,  $\text{model} = \text{DOM}$ ,  $N = 405$

**NLELGLTQGSFAFIHK pc3  
rs2232700 REF**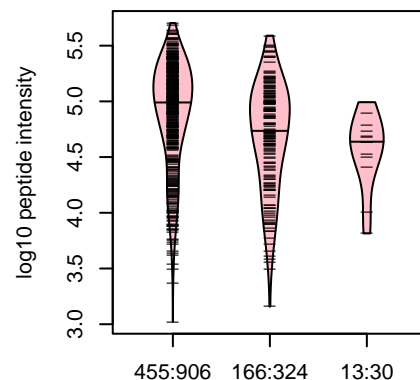

13:113813853:A:G\_G  
 $p = 0.47$ ,  $\text{model} = \text{DOM}$ ,  $N = 634$

**ETLSRNLELGLTQGSFAFIHK pc4  
rs2232700 REF**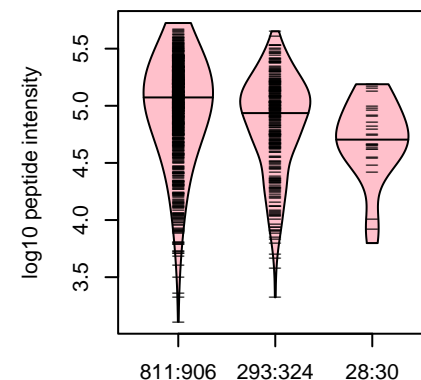

13:113813853:A:G\_G  
 $p = 0.6$ ,  $\text{model} = \text{REC}$ ,  $N = 1132$

Locus: 148 (Sort: 172)  
 Status: Not replicated  
 80% power: No  
 SNP: 13:113813853:A:G  
 rsID: rs3024718  
 UniProtID: G3V2W1  
 HGNC gene: SERPINA10  
 Type: Trans-pQTL

**PROZ [cis]**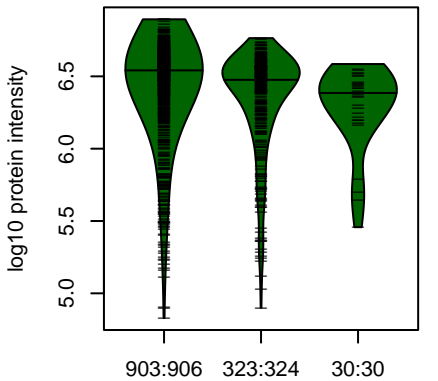

13:113813853:A:G\_G  
 $p = 8.7e-13$ ,  $\beta = -0.39$ ,  $N = 1256$

**NECHPER pc2**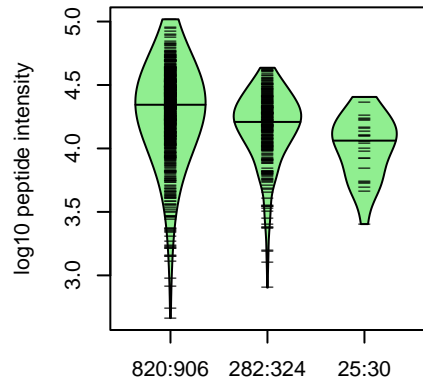

13:113813853:A:G\_G  
 $p = 2.4e-16$ ,  $\beta = -0.477$ ,  $N = 1127$

**APDLQLDPWQVK pc2**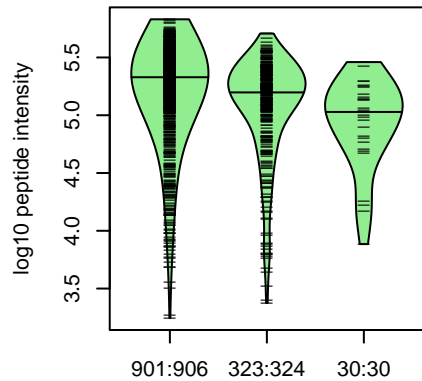

13:113813853:A:G\_G  
 $p = 8.7e-16$ ,  $\beta = -0.438$ ,  $N = 1254$

**DFAEHLIPR pc2**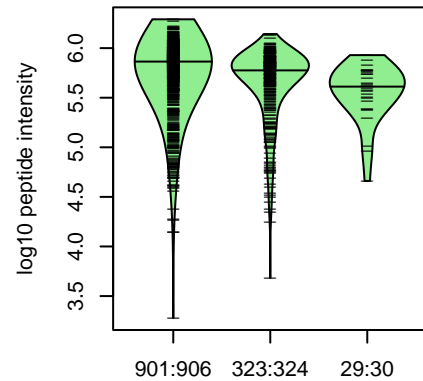

13:113813853:A:G\_G  
 $p = 9.3e-16$ ,  $\beta = -0.44$ ,  $N = 1253$

**RAPDLQLDPWQVK pc3**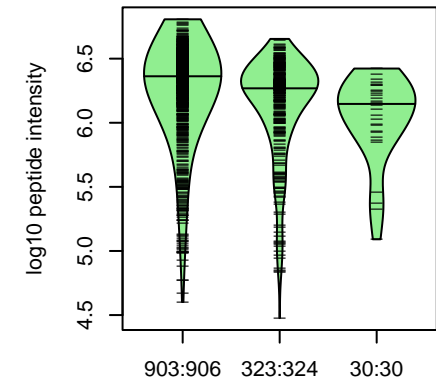

13:113813853:A:G\_G  
 $p = 4e-15$ ,  $\beta = -0.428$ ,  $N = 1256$

**P22891 NP2**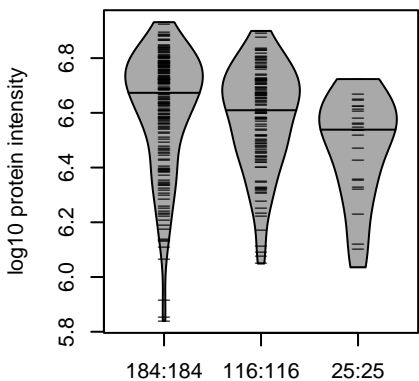

rs3024718  
 $p = 0.0059$ ,  $\beta = -0.237$ ,  $N = 325$

**NECHPER pc2**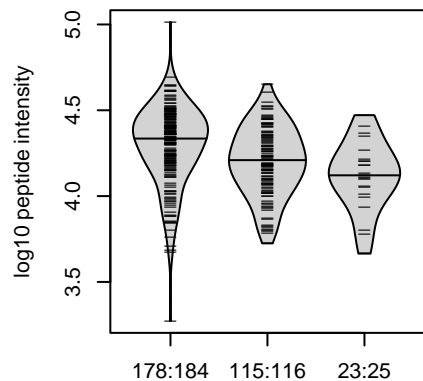

rs3024718  
 $p = 1.7e-06$ ,  $\beta = -0.416$ ,  $N = 316$

**ITHVHVHMR pc2**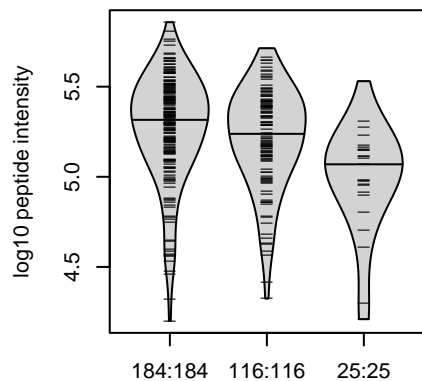

rs3024718  
 $p = 3e-04$ ,  $\beta = -0.309$ ,  $N = 325$

**SSVAAMHWMDGSVVTR pc2**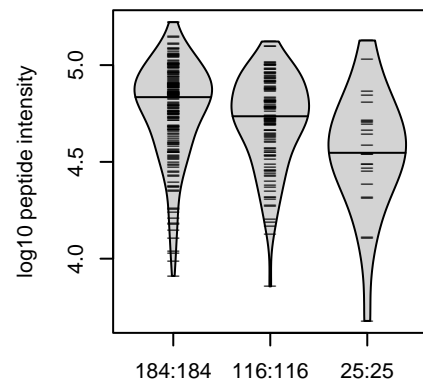

rs3024718  
 $p = 0.0025$ ,  $\beta = -0.259$ ,  $N = 325$

**APDLQLDPWQVK pc2**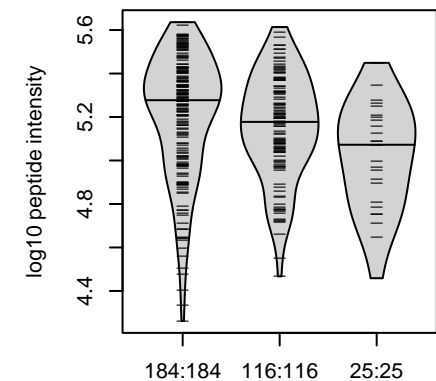

rs3024718  
 $p = 0.0026$ ,  $\beta = -0.258$ ,  $N = 325$

Locus: 148 (Sort: 173)

Status: Not replicated

80% power: No

SNP: 13:113813853:A:G

rsID: rs3024718

UniProtID: P22891

HGNC gene: PROZ

Type: Cis-pQTL

**PEBP4 [cis]**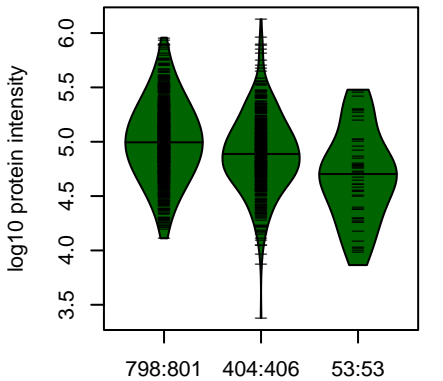

8:22785047:C:T\_T  
 $p = 6.1e-14$ ,  $\beta = -0.366$ ,  $N = 1255$

**ITSWMEPIVK pc2**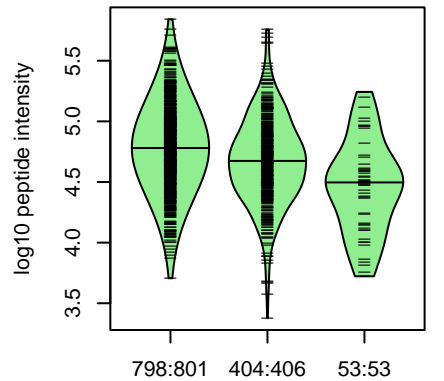

8:22785047:C:T\_T  
 $p = 5.2e-13$ ,  $\beta = -0.352$ ,  $N = 1255$

**VVPDCNNYR pc2**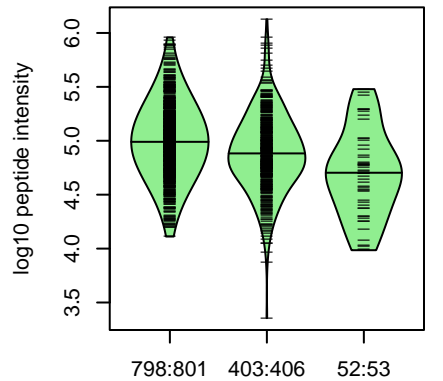

8:22785047:C:T\_T  
 $p = 7.3e-13$ ,  $\beta = -0.351$ ,  $N = 1253$

**IQGQELSAYQAPSPPAHSGFHR pc**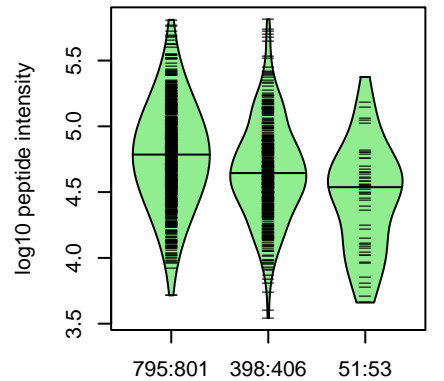

8:22785047:C:T\_T  
 $p = 2e-12$ ,  $\beta = -0.346$ ,  $N = 1244$

**YQFFVYLQEGK pc2**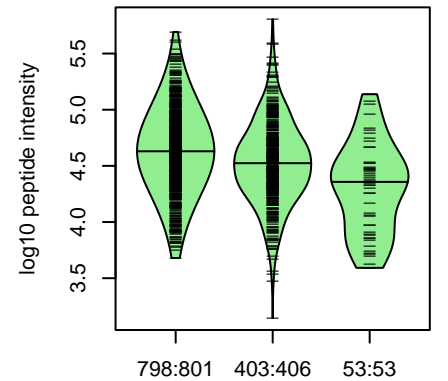

8:22785047:C:T\_T  
 $p = 2.6e-12$ ,  $\beta = -0.342$ ,  $N = 1254$

**Q96S96 NP3**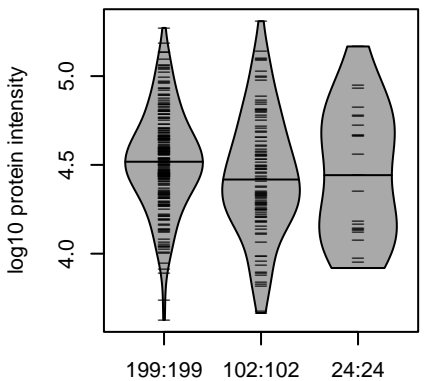

rs73218763  
 $p = 0.08$ ,  $\beta = -0.151$ ,  $N = 325$

**YQFFVYLQEGK pc2**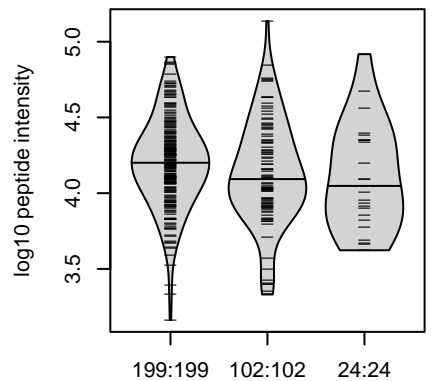

rs73218763  
 $p = 0.077$ ,  $\beta = -0.154$ ,  $N = 325$

**ITSWMEPIVK pc2**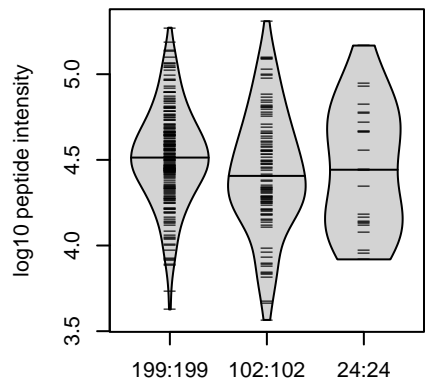

rs73218763  
 $p = 0.097$ ,  $\beta = -0.144$ ,  $N = 325$

**VVPDCNNYR pc2**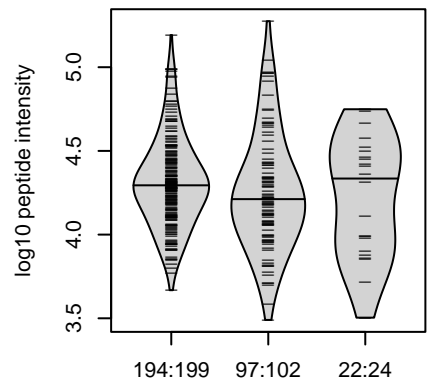

rs73218763  
 $p = 0.11$ ,  $\beta = -0.143$ ,  $N = 313$

**HWLVTDIK pc2**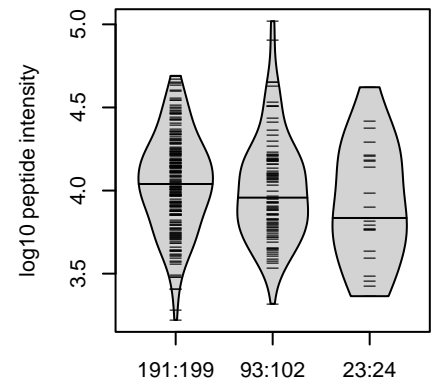

rs73218763  
 $p = 0.14$ ,  $\beta = -0.132$ ,  $N = 307$

Locus: 149 (Sort: 174)

Status: Not replicated

80% power: No

SNP: 8:22785047:C:T

rsID: rs73218763

UniProtID: Q96S96

HGNC gene: PEBP4

Type: Cis-pQTL

**SERPINA11 [cis]**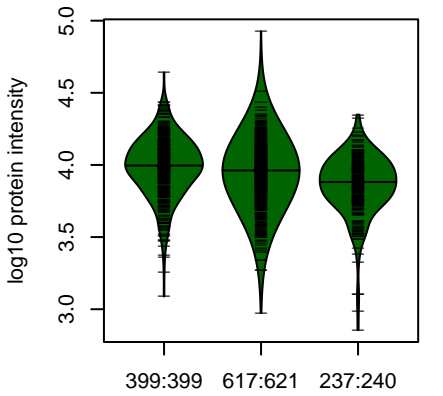

14:94928189:G:T\_T  
 $p = 6.2e-14$ ,  $\beta = -0.298$ ,  $N = 1253$

**ITPTITNFALR pc2**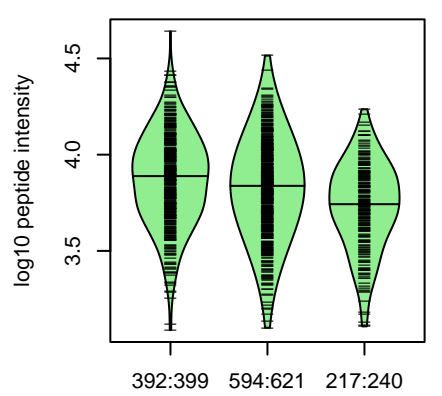

14:94928189:G:T\_T  
 $p = 7.2e-12$ ,  $\beta = -0.28$ ,  $N = 1203$

**AMVDMSEK pc2**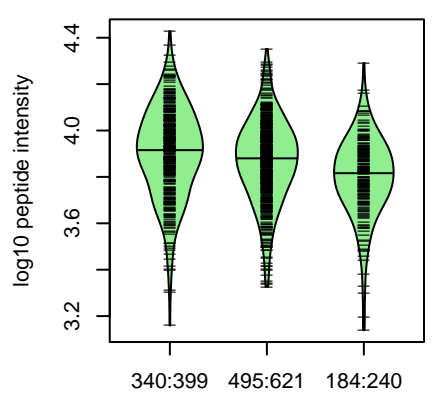

14:94928189:G:T\_T  
 $p = 1.2e-10$ ,  $\beta = -0.284$ ,  $N = 1019$

**GNALALLVLPDPGK pc2**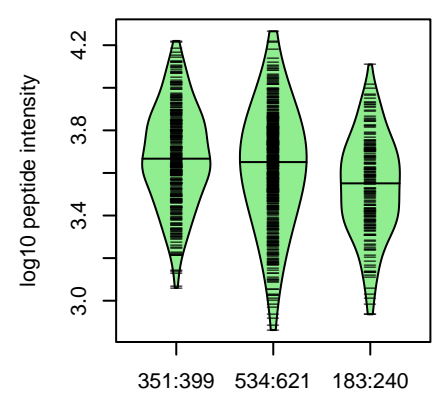

14:94928189:G:T\_T  
 $p = 1.5e-10$ ,  $\beta = -0.28$ ,  $N = 1068$

**VGNSLFLDK pc2**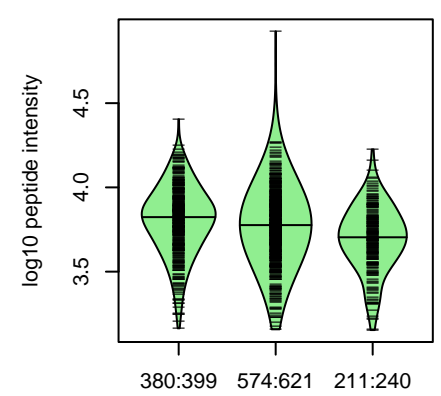

14:94928189:G:T\_T  
 $p = 7e-10$ ,  $\beta = -0.256$ ,  $N = 1165$

**Q86U17 NP3**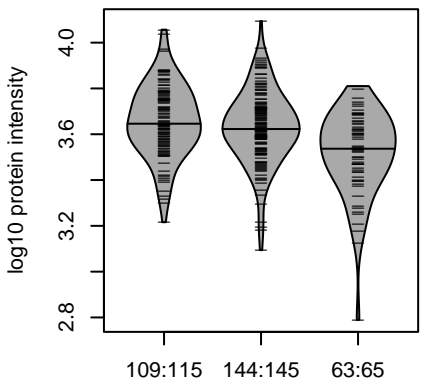

rs11160181  
 $p = 4e-07$ ,  $\beta = -0.38$ ,  $N = 316$

**VGNSLFLDK pc2**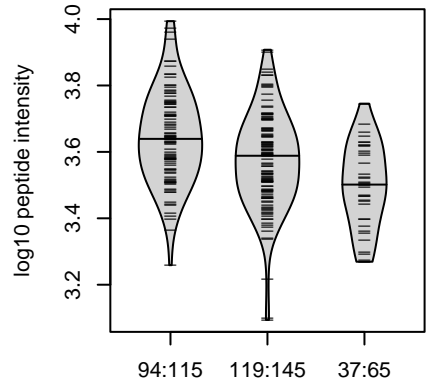

rs11160181  
 $p = 6.4e-09$ ,  $\beta = -0.51$ ,  $N = 250$

**HQLSEPAPAYHR pc3**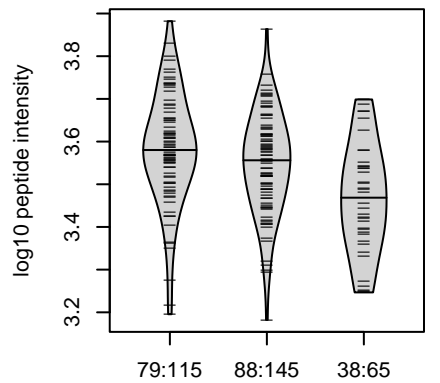

rs11160181  
 $p = 1.3e-05$ ,  $\beta = -0.402$ ,  $N = 205$

**QVEAALQPQTLR pc2**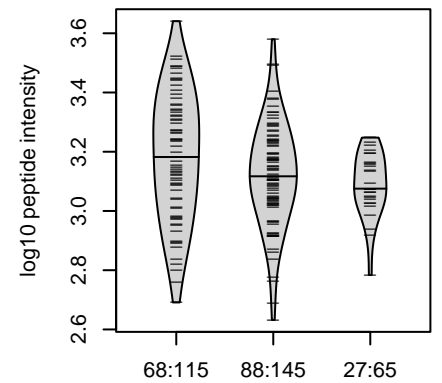

rs11160181  
 $p = 0.0051$ ,  $\beta = -0.294$ ,  $N = 183$

**GNALALLVLPDPGK pc2**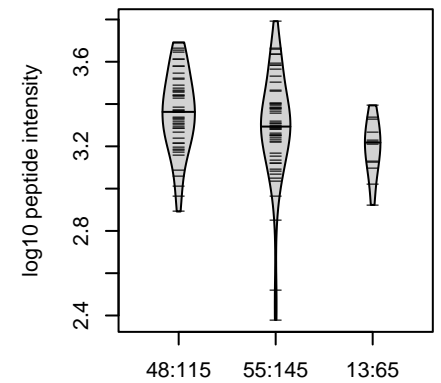

rs11160181  
 $p = 0.014$ ,  $\beta = -0.334$ ,  $N = 116$

**QESFFVDER pc2  
rs1885137 REF**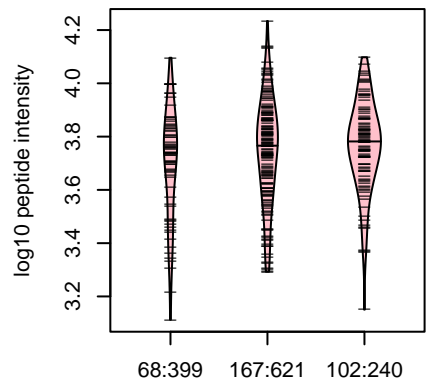

14:94928189:G:T\_T  
 $p = 3.6e-09$ ,  $\text{model} = \text{DOM}$ ,  $N = 337$

Locus: 150 (Sort: 175)  
 Status: Replicated  
 80% power: No  
 SNP: 14:94928189:G:T  
 rsID: rs11160181  
 UniProtID: Q86U17  
 HGNC gene: SERPINA11  
 Type: Cis-pQTL

**ORM2 [cis]**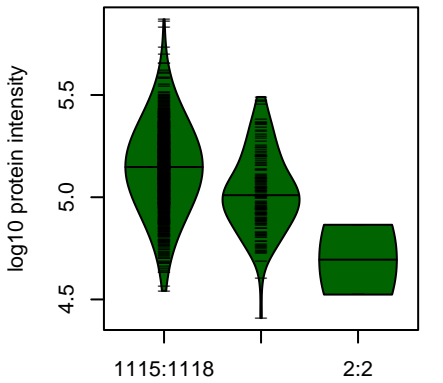

9:117083803:C:A\_A  
 $p = 7.1e-14$ ,  $\beta = -0.645$ ,  $N = 1256$

**TLMFGSYLDDEK pc2**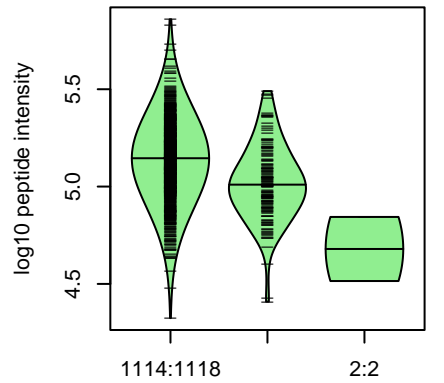

9:117083803:C:A\_A  
 $p = 1.9e-13$ ,  $\beta = -0.634$ ,  $N = 1255$

**NWGLSFYADKPETTK pc3**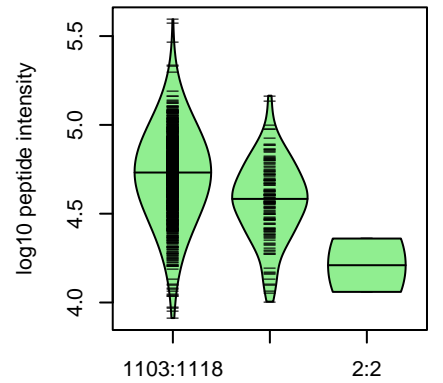

9:117083803:C:A\_A  
 $p = 2.4e-13$ ,  $\beta = -0.637$ ,  $N = 1241$

**EQLGEFYEALDCLCIPR pc3**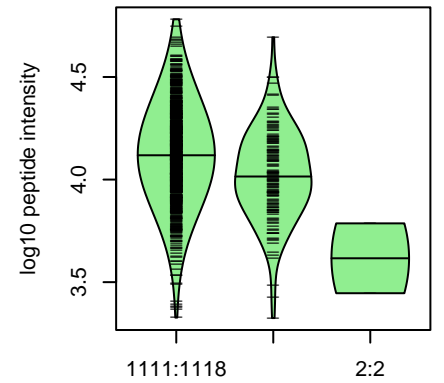

9:117083803:C:A\_A  
 $p = 3.1e-08$ ,  $\beta = -0.481$ ,  $N = 1251$

**SDVMYTDWK pc2**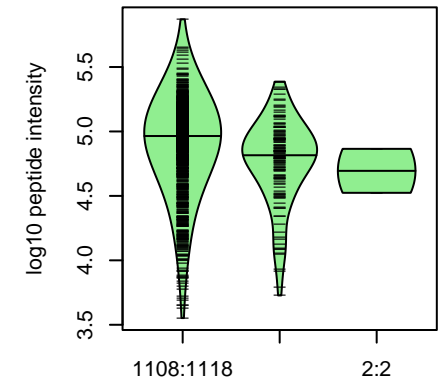

9:117083803:C:A\_A  
 $p = 1.2e-06$ ,  $\beta = -0.426$ ,  $N = 1245$

**P19652 NP2**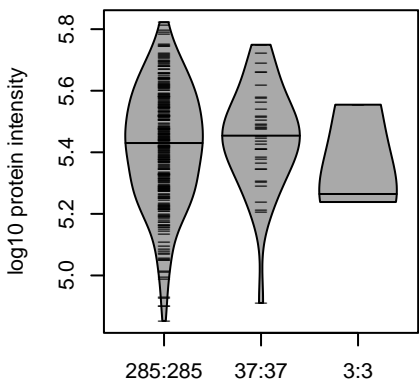

rs150611042  
 $p = 0.41$ ,  $\beta = -0.125$ ,  $N = 325$

**NWGLSFYADKPETTK pc3**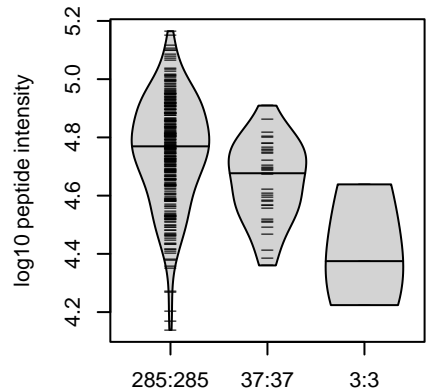

rs150611042  
 $p = 2.1e-07$ ,  $\beta = -0.764$ ,  $N = 325$

**TLMFGSYLDDEK pc2**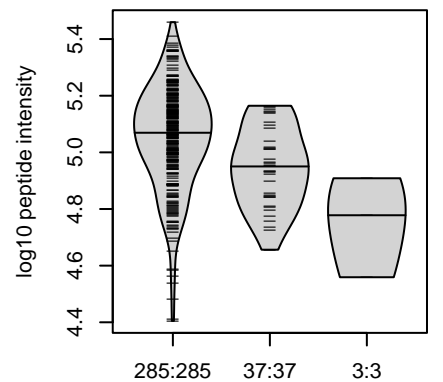

rs150611042  
 $p = 3.1e-07$ ,  $\beta = -0.753$ ,  $N = 325$

**SDVMYTDWK pc2**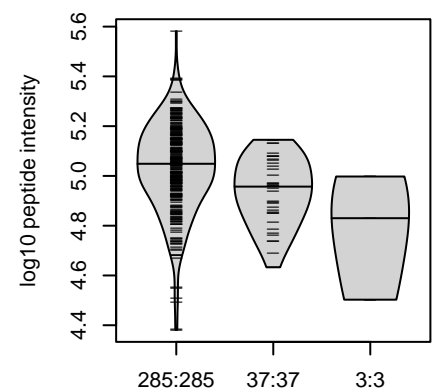

rs150611042  
 $p = 8.2e-07$ ,  $\beta = -0.727$ ,  $N = 325$

**EHVAHLLFLR pc3**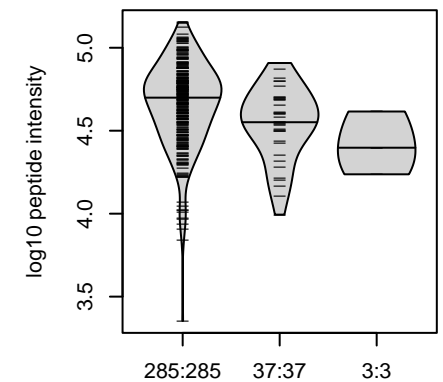

rs150611042  
 $p = 1e-04$ ,  $\beta = -0.576$ ,  $N = 325$

Locus: 151 (Sort: 176)

Status: Not replicated

80% power: No

SNP: 9:117083803:C:A

rsID: rs150611042

UniProtID: P19652

HGNC gene: ORM2

Type: Cis-pQTL

**TNFAIP6 [cis]**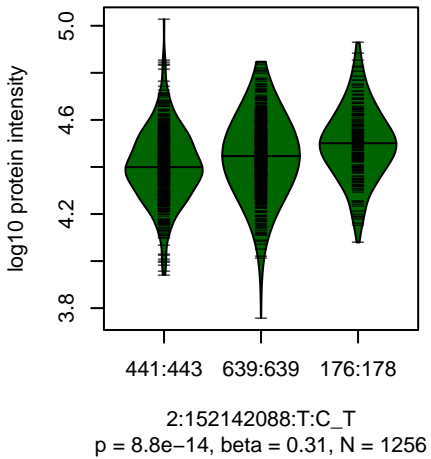**AVCEFEGGHLATYK pc3**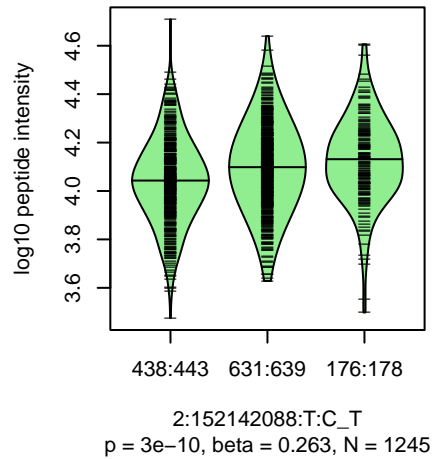**FLSDASVTAGGFQIK pc2**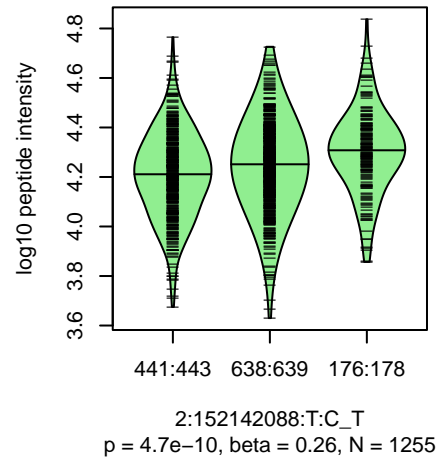**DGIFHNSIWLER pc3**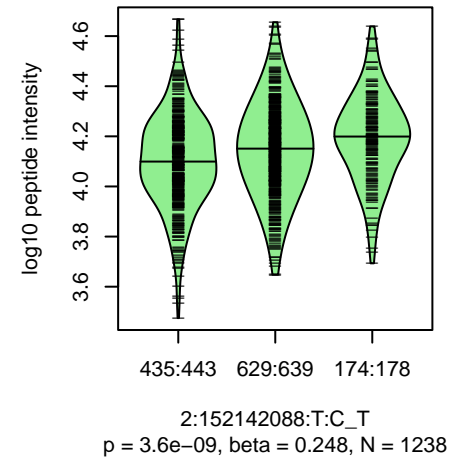**TGIIDYGIR pc2**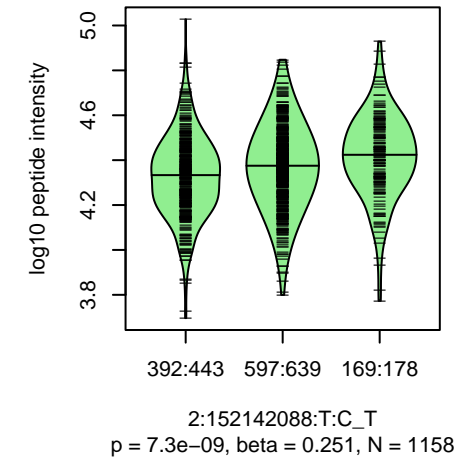**P98066 NP5**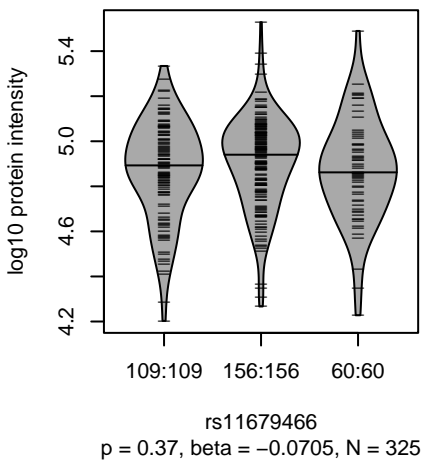**YEGGREHVAHLLFLR pc4**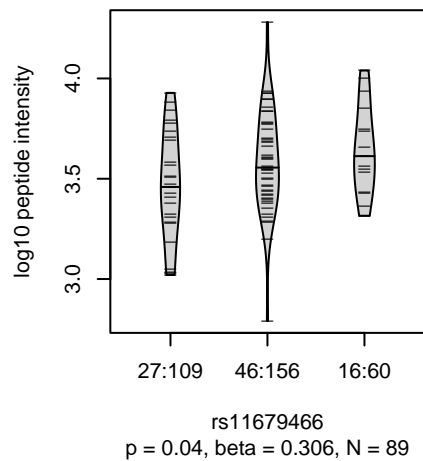**NWGLSFYADKPETTK pc2**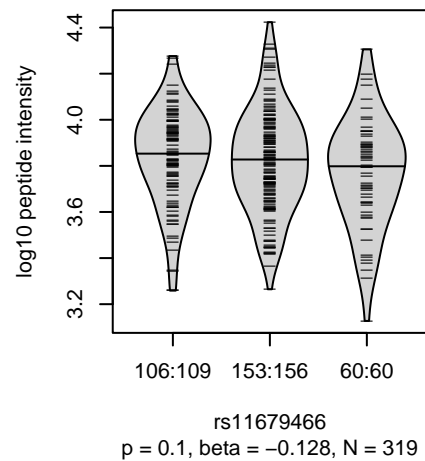**EQLGEFYEALDCLCIPR pc3**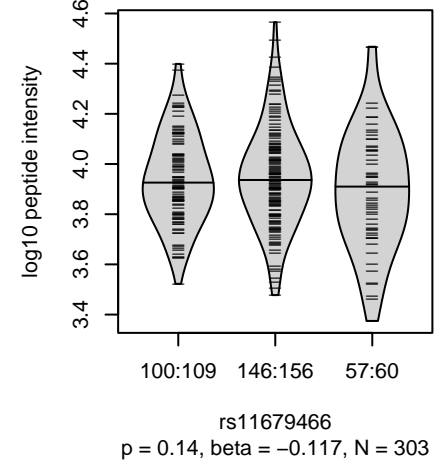**WFIASAFR pc2**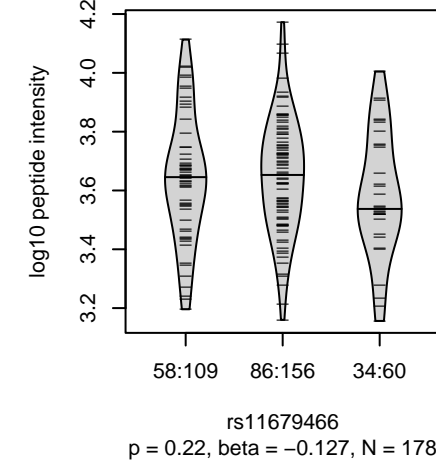

Locus: 152 (Sort: 177)  
 Status: Not replicated  
 80% power: No  
 SNP: 2:152142088:T:C  
 rsID: rs11679466  
 UniProtID: P98066  
 HGNC gene: TNFAIP6  
 Type: Cis-pQTL



**TCN2 [cis]**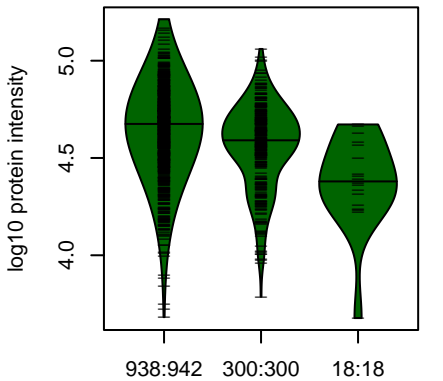

22:31022590:C:T\_T  
 $p = 9.5e-14$ ,  $\beta = -0.437$ ,  $N = 1256$

**TYIDLIFPDCLAPR pc2**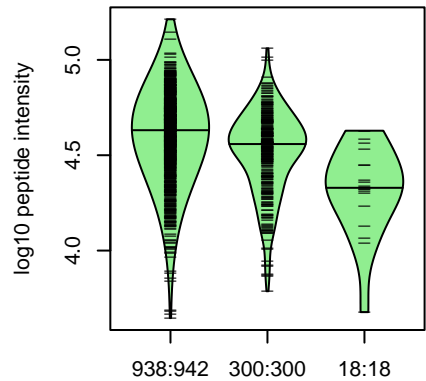

22:31022590:C:T\_T  
 $p = 2.3e-14$ ,  $\beta = -0.447$ ,  $N = 1256$

**LSSLQAGTK pc2**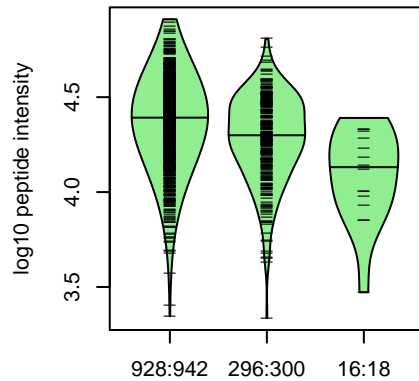

22:31022590:C:T\_T  
 $p = 1.6e-13$ ,  $\beta = -0.44$ ,  $N = 1240$

**.YAVEPFHQGHHSVDTAAMAGLAFTCL**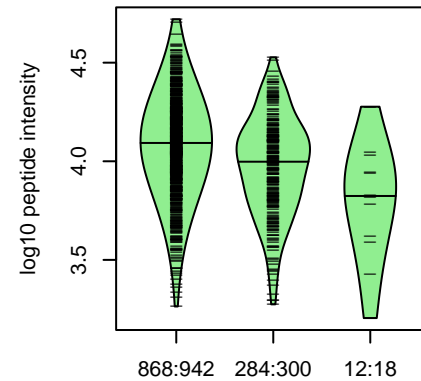

22:31022590:C:T\_T  
 $p = 1.3e-12$ ,  $\beta = -0.441$ ,  $N = 1164$

**TVREEILK pc2**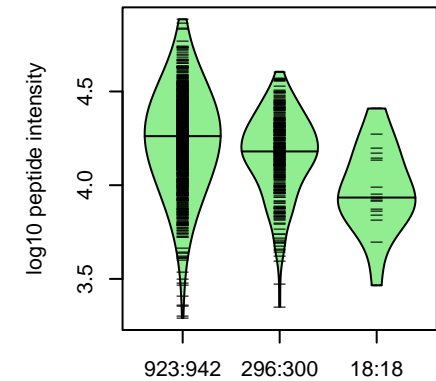

22:31022590:C:T\_T  
 $p = 2.9e-11$ ,  $\beta = -0.393$ ,  $N = 1237$

**F8WE86 NP1**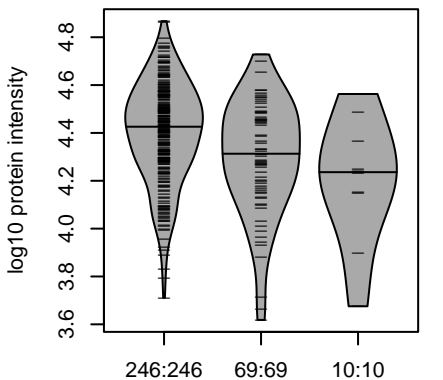

rs12169610  
 $p = 2.3e-05$ ,  $\beta = -0.446$ ,  $N = 325$

**TYIDLIFPDCLAPR pc2**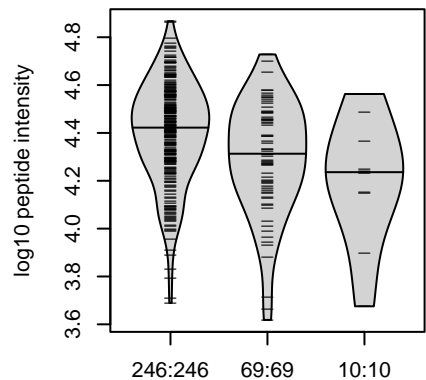

rs12169610  
 $p = 3e-05$ ,  $\beta = -0.442$ ,  $N = 325$

**EDLYLHSLK pc2**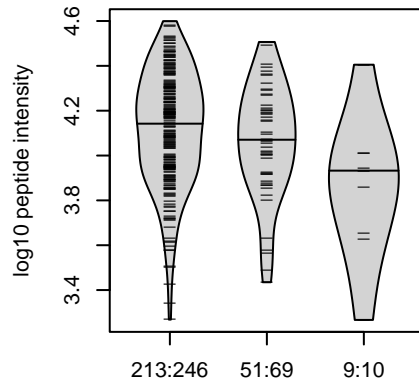

rs12169610  
 $p = 0.002$ ,  $\beta = -0.363$ ,  $N = 273$

**.YAVEPFHQGHHSVDTAAMAGLAFTCL**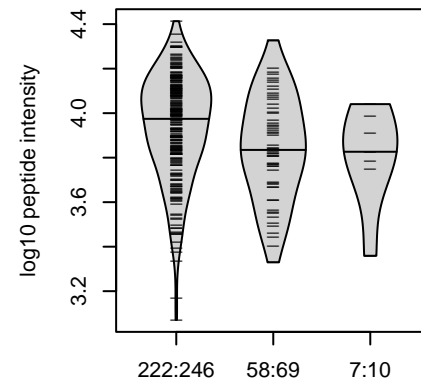

rs12169610  
 $p = 0.0035$ ,  $\beta = -0.347$ ,  $N = 287$

**WFLEDEK pc2**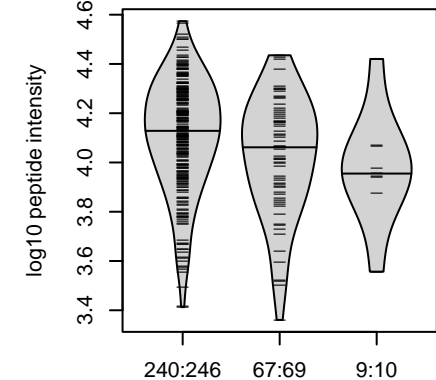

rs12169610  
 $p = 0.0043$ ,  $\beta = -0.313$ ,  $N = 316$

Locus: 153 (Sort: 178)  
 Status: Replicated  
 80% power: No  
 SNP: 22:31022590:C:T  
 rsID: rs12169610  
 UniProtID: F8WE86  
 HGNC gene: TCN2  
 Type: Cis-pQTL

**QSIFVLGASTVEDVLK pc2  
rs9621049 ALT**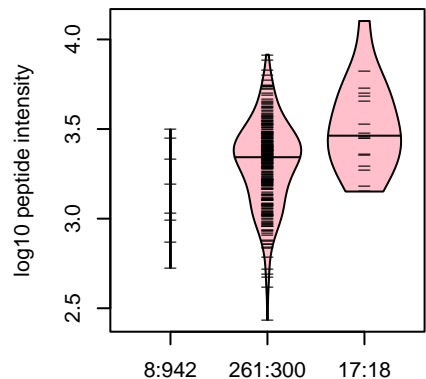

22:31022590:C:T\_T  
 $p = 5.4e-222$ , model = REC,  $N = 286$

**QSIFVLGASTVEDVLKK pc3  
rs9621049 ALT**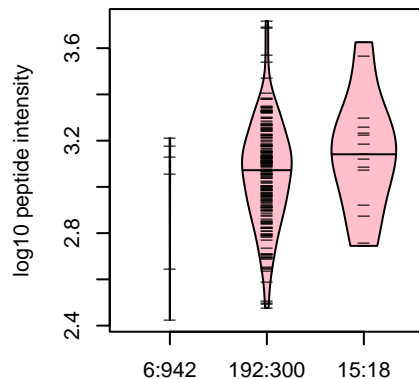

22:31022590:C:T\_T  
 $p = 7.5e-145$ , model = REC,  $N = 213$

**QSI SVLAGSTVEDVLKK pc3  
rs9621049 REF**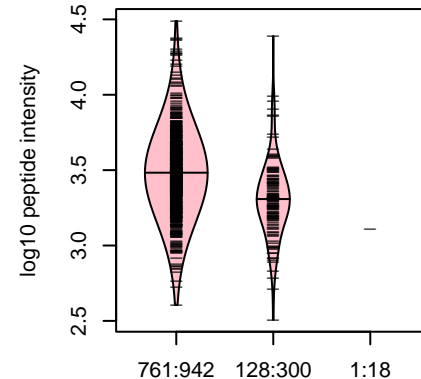

22:31022590:C:T\_T  
 $p = 1.4e-39$ , model = REC,  $N = 890$

**QSI SVLAGSTVEDVLK pc2  
rs9621049 REF**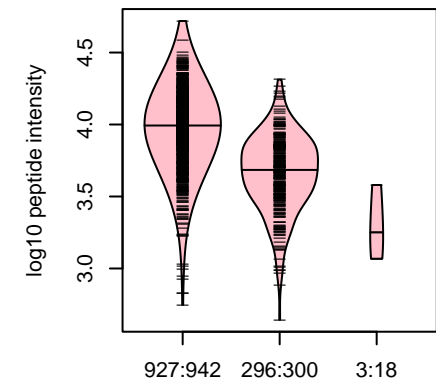

22:31022590:C:T\_T  
 $p = 6.4e-23$ , model = DOM,  $N = 1226$

**PRB1 [cis]**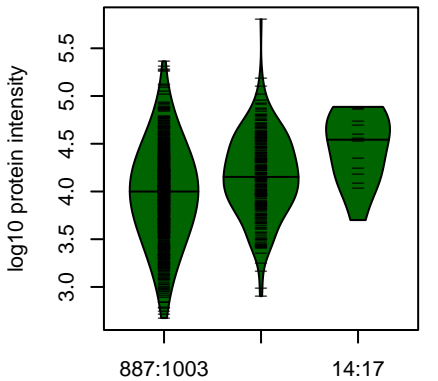

12:11510612:C:T\_T  
 $p = 9.6e-14$ ,  $\beta = 0.485$ ,  $N = 1133$

**PQGPPPQGDK pc2**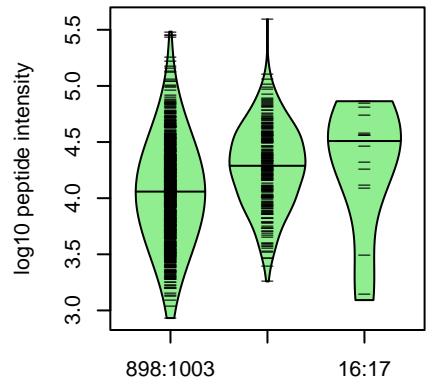

12:11510612:C:T\_T  
 $p = 5.6e-15$ ,  $\beta = 0.499$ ,  $N = 1149$

**PQGPPAQGGSK pc2**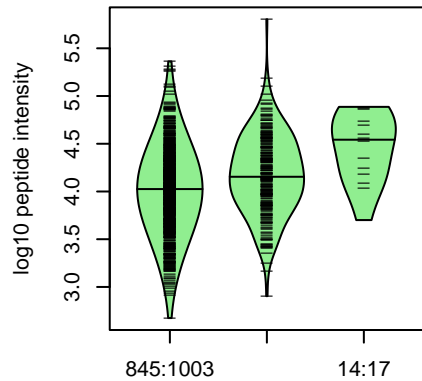

12:11510612:C:T\_T  
 $p = 8.1e-12$ ,  $\beta = 0.449$ ,  $N = 1089$

**PQGPPPQGGNK pc2**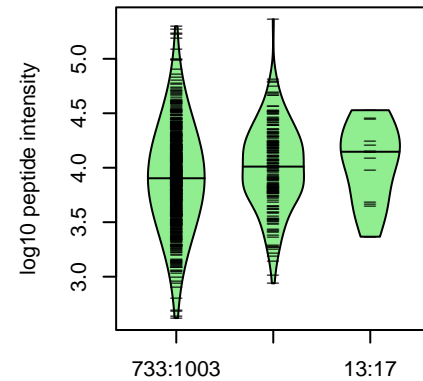

12:11510612:C:T\_T  
 $p = 0.00092$ ,  $\beta = 0.237$ ,  $N = 936$

**PQGPPPPGK pc2**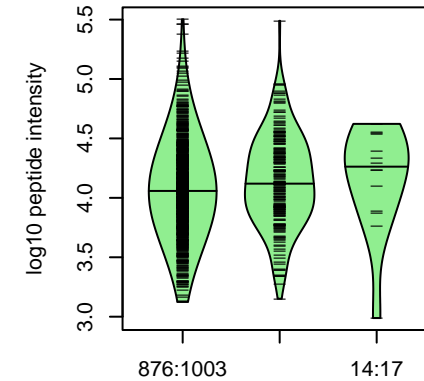

12:11510612:C:T\_T  
 $p = 0.0014$ ,  $\beta = 0.215$ ,  $N = 1105$

**A0A4W8X8U3 NP4**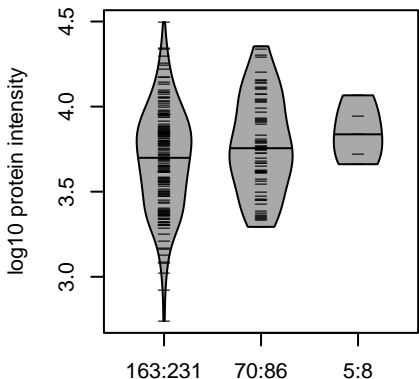

rs3759237  
 $p = 0.034$ ,  $\beta = 0.263$ ,  $N = 238$

**PQGPPPQGDK pc2**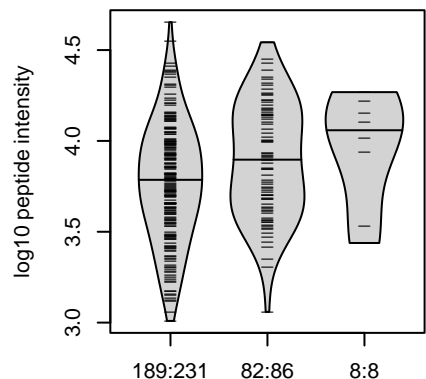

rs3759237  
 $p = 0.0031$ ,  $\beta = 0.325$ ,  $N = 279$

**PQGPPPQGGK pc2**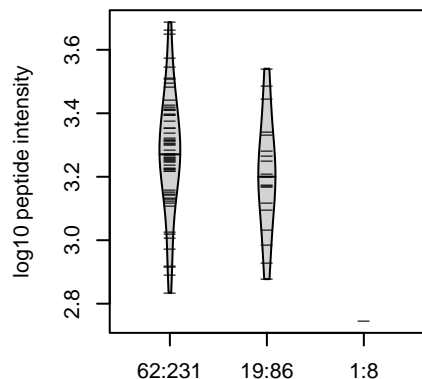

rs3759237  
 $p = 0.012$ ,  $\beta = -0.571$ ,  $N = 82$

**PQGPPAQGGSK pc2**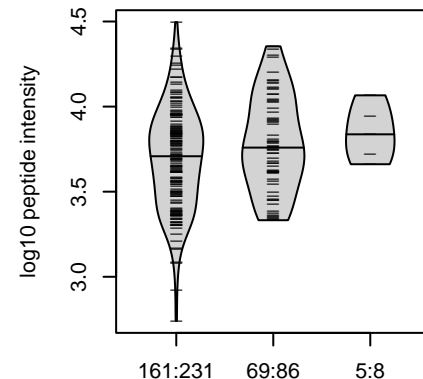

rs3759237  
 $p = 0.024$ ,  $\beta = 0.279$ ,  $N = 235$

**PQGPPPPGK pc2**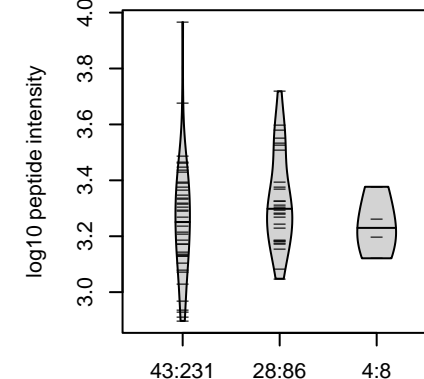

rs3759237  
 $p = 0.17$ ,  $\beta = 0.254$ ,  $N = 75$

Locus: 154 (Sort: 179)  
 Status: Not replicated  
 80% power: No  
 SNP: 12:11510612:C:T  
 rsID: rs3759237  
 UniProtID: A0A4W8X8U3  
 HGNC gene: PRB1  
 Type: Cis-pQTL

**HSP90B1 [cis]**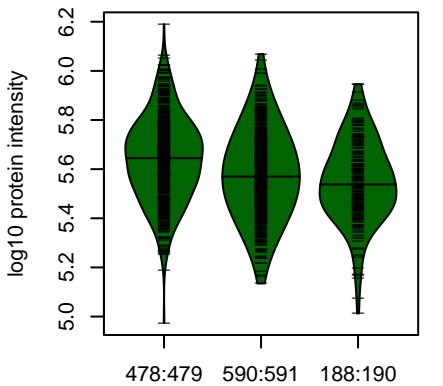

12:104147207:A:G\_A  
 $p = 1.1e-13$ ,  $\beta = -0.299$ ,  $N = 1256$

**VFITDDFHDMPK pc3**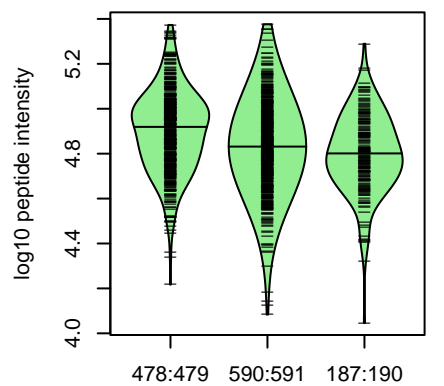

12:104147207:A:G\_A  
 $p = 4.2e-14$ ,  $\beta = -0.304$ ,  $N = 1255$

**SILFVPTSAPR pc2**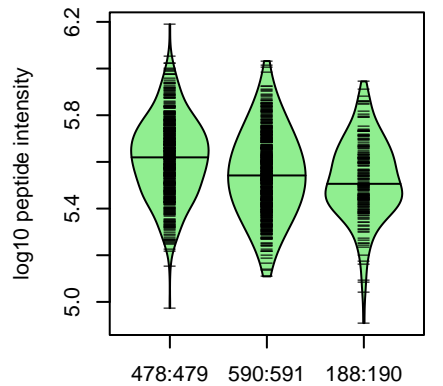

12:104147207:A:G\_A  
 $p = 8.2e-14$ ,  $\beta = -0.301$ ,  $N = 1256$

**EVEEDEYK pc2**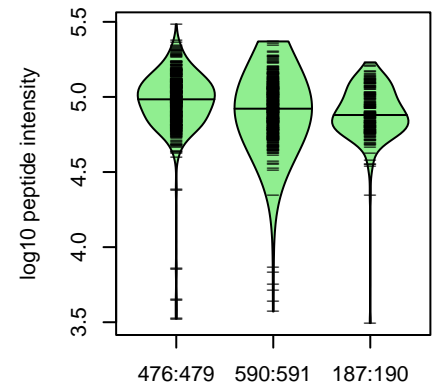

12:104147207:A:G\_A  
 $p = 2.1e-13$ ,  $\beta = -0.296$ ,  $N = 1253$

**GLFDEYGSK pc2**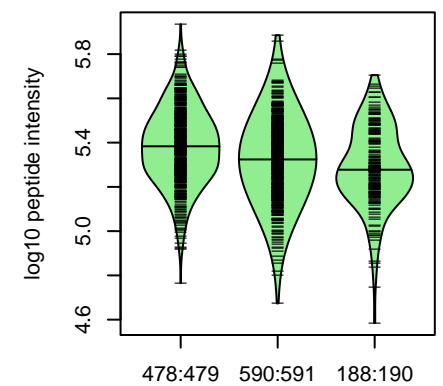

12:104147207:A:G\_A  
 $p = 4.2e-13$ ,  $\beta = -0.292$ ,  $N = 1256$

**P14625 NP2**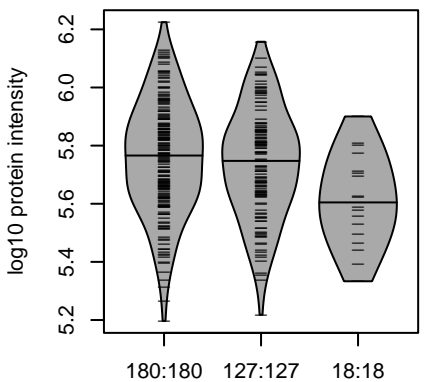

rs3751198  
 $p = 0.0017$ ,  $\beta = -0.286$ ,  $N = 325$

**RVFITDDFHDMPK pc3**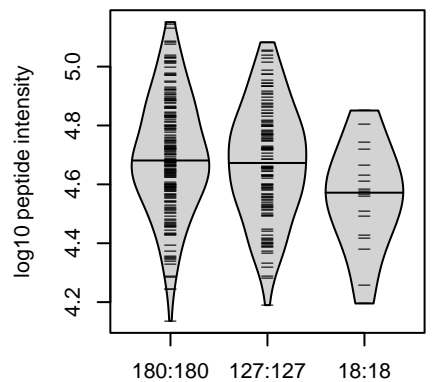

rs3751198  
 $p = 0.0027$ ,  $\beta = -0.272$ ,  $N = 325$

**DISTNYYASQK pc2**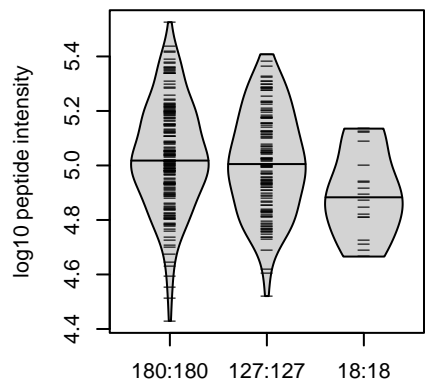

rs3751198  
 $p = 0.0028$ ,  $\beta = -0.271$ ,  $N = 325$

**SILFVPTSAPR pc2**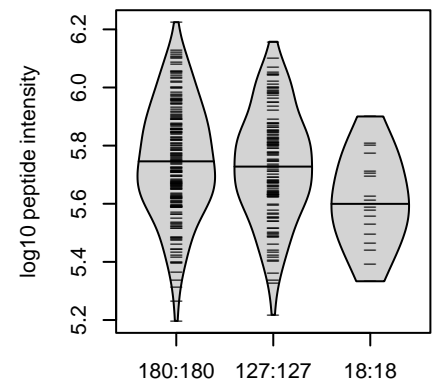

rs3751198  
 $p = 0.003$ ,  $\beta = -0.269$ ,  $N = 325$

**SGTSEFLNK pc2**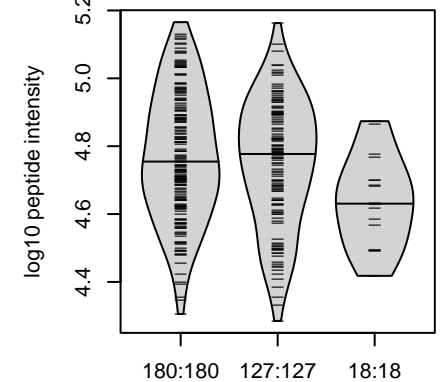

rs3751198  
 $p = 0.0031$ ,  $\beta = -0.268$ ,  $N = 325$

Locus: 155 (Sort: 180)

Status: Not replicated

80% power: No

SNP: 12:104147207:A:G

rsID: rs3751198

UniProtID: P14625

HGNC gene: HSP90B1

Type: Cis-pQTL

**MST1 [cis]**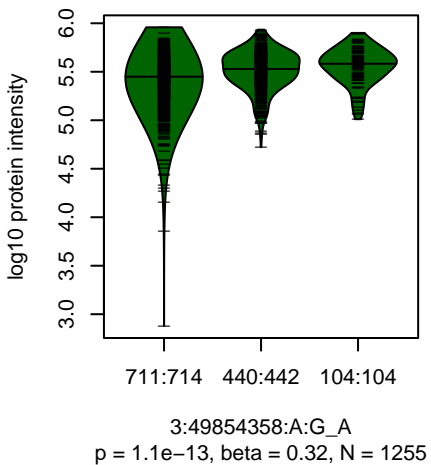**WDLQHPHQHPFEPGK pc4**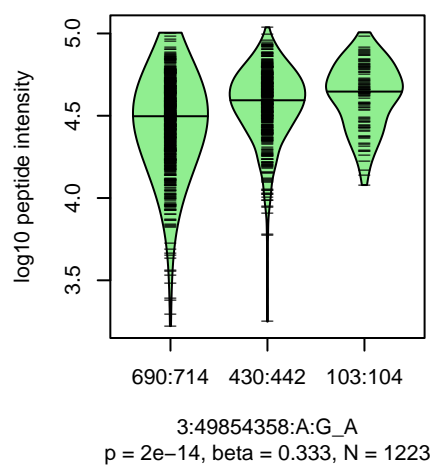**QEATTVSCFR pc2**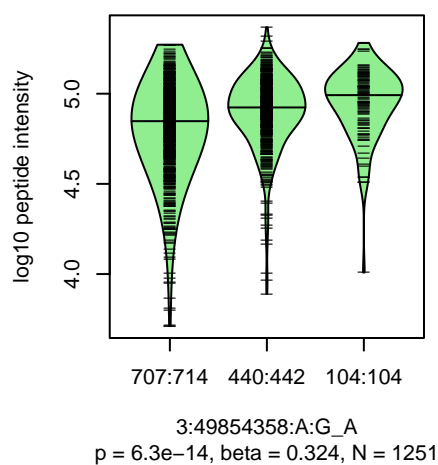**CGPLMDCR pc2**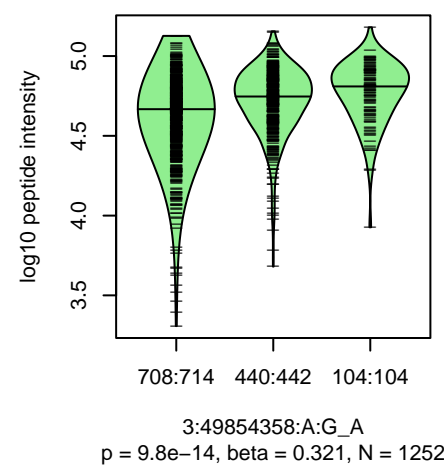**MVCGPSGSQVLVLLK pc2**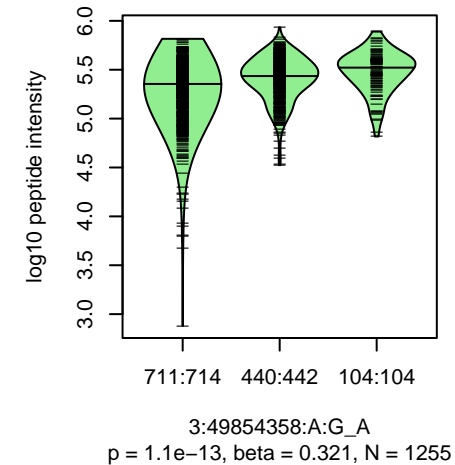**G3XAK1 NP3**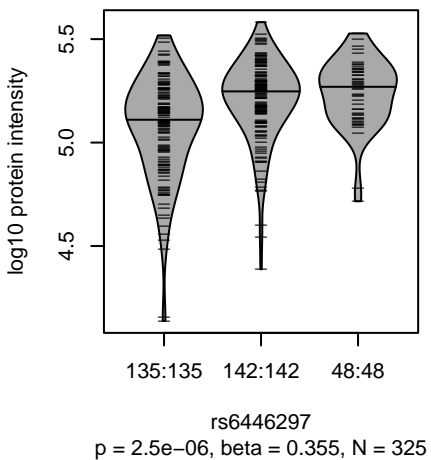**CEIAGWGETK pc3**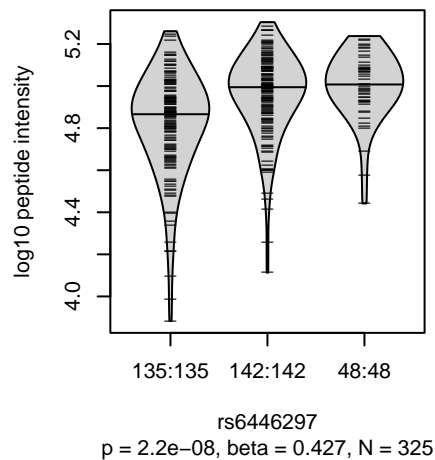**WDAQIPHQHR pc3**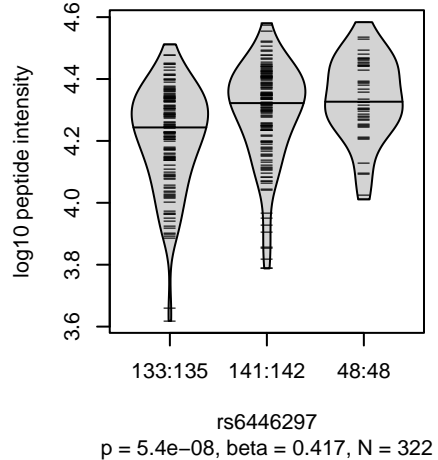**NPDGSEAPWCFTLRPGMR pc3**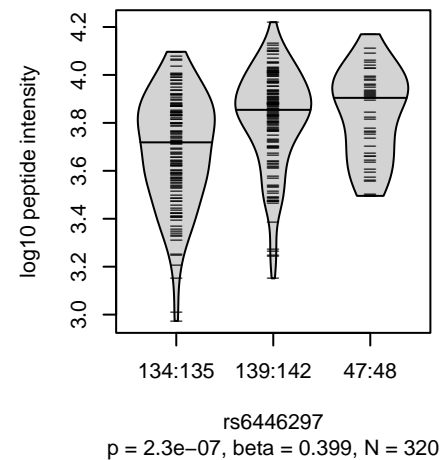**TCIMNNGVGYR pc2**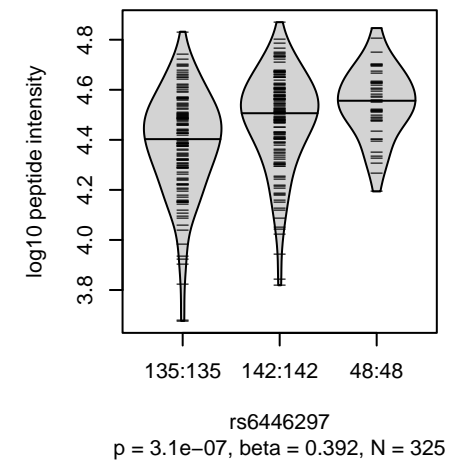**SCWPAVFTR pc2  
rs3197999 ALT**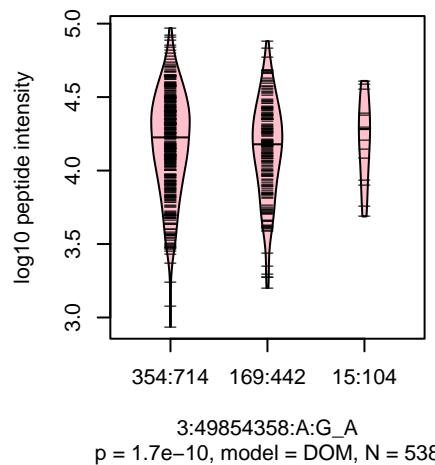**WPAVFTR pc2  
rs3197999 REF**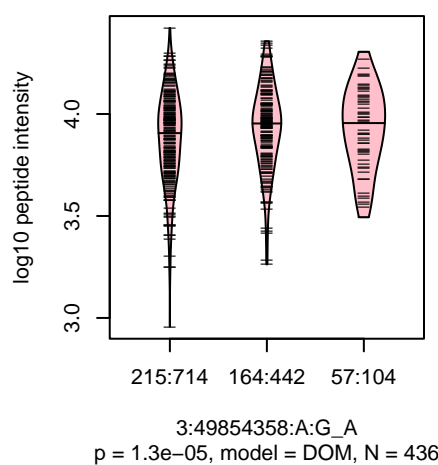

Locus: 156 (Sort: 181)  
Status: Replicated  
80% power: No  
SNP: 3:49854358:A:G  
rsID: rs6446297  
UniProtID: G3XAK1  
HGNC gene: MST1  
Type: Cis-pQTL

### ZNF618 [trans]

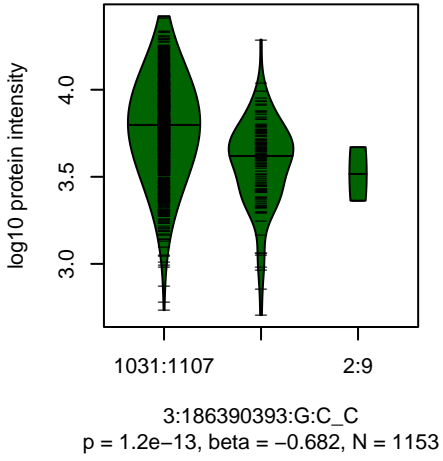

### RLLSPEDMNK pc2

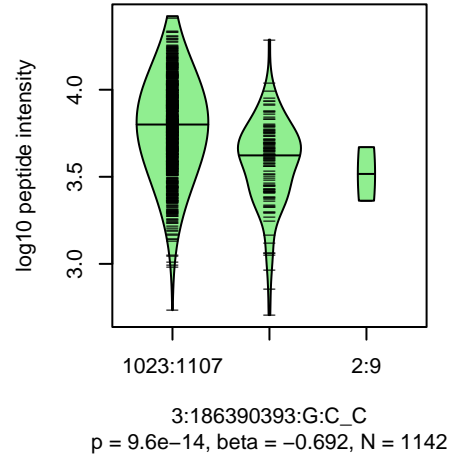

### ADPFDQGVVATDEVK pc2

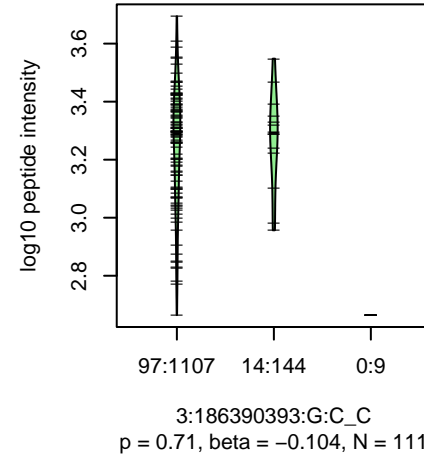

### Q5T7W0 NP1

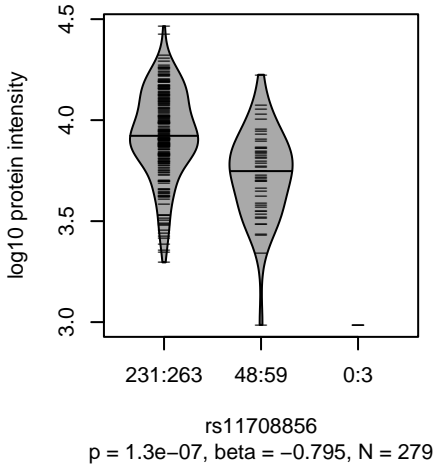

### RLLSPEDMNK pc2

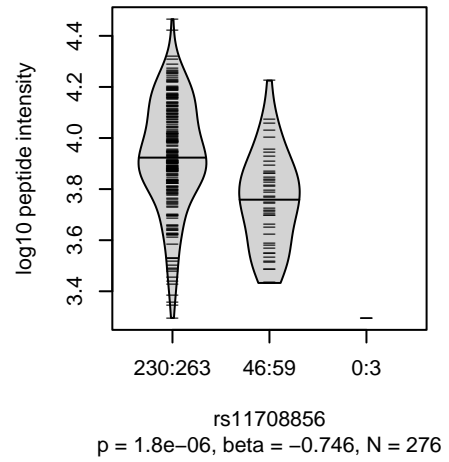

### ADPFDQGVVATDEVK pc2

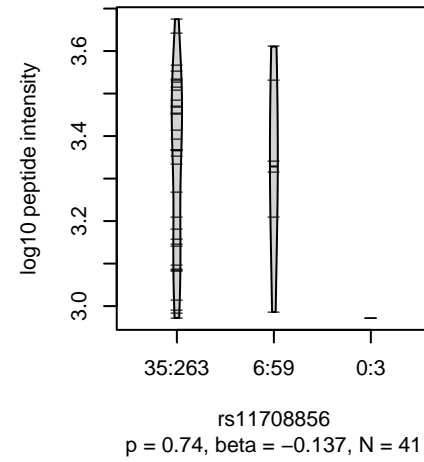

Locus: 157 (Sort: 182)  
Status: Replicated  
80% power: No  
SNP: 3:186390393:G:C  
rsID: rs11708856  
UniProtID: Q5T7W0  
HGNC gene: ZNF618  
Type: Trans-pQTL

**SSC5D [cis]**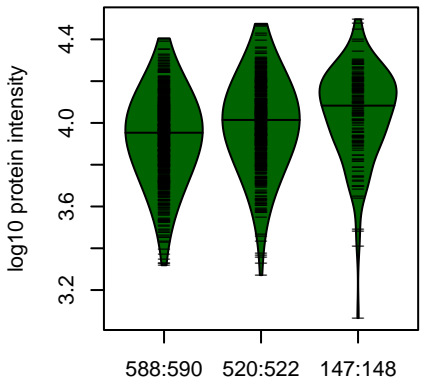

19:55999142:C:G\_G  
 $p = 1.2e-13$ ,  $\beta = 0.304$ ,  $N = 1255$

**SNCDHSEDAGLVCTGPAPR pc3**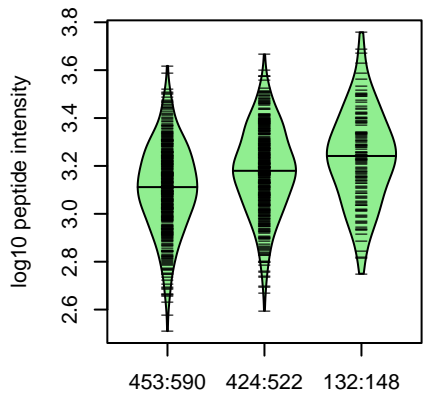

19:55999142:C:G\_G  
 $p = 1.5e-15$ ,  $\beta = 0.356$ ,  $N = 1009$

**LTQVVEQER pc2**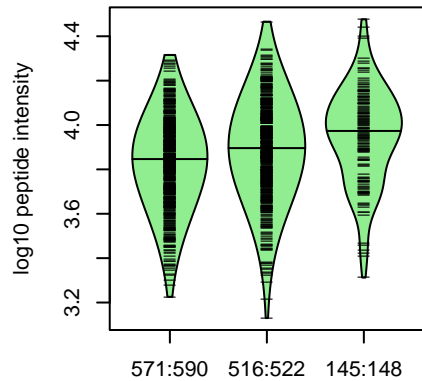

19:55999142:C:G\_G  
 $p = 5.2e-13$ ,  $\beta = 0.298$ ,  $N = 1232$

**ELGCGGALAAPGGAR pc2**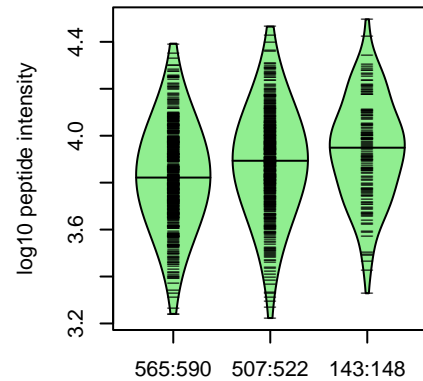

19:55999142:C:G\_G  
 $p = 8.6e-11$ ,  $\beta = 0.27$ ,  $N = 1215$

**GSEASLSDCPGAWGK pc2**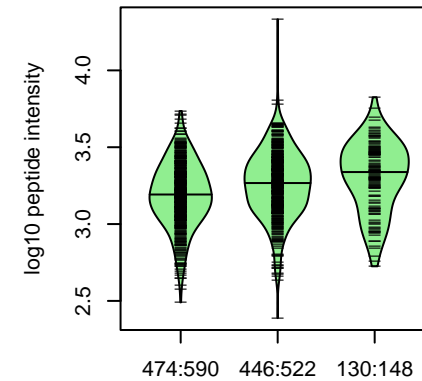

19:55999142:C:G\_G  
 $p = 1.6e-10$ ,  $\beta = 0.284$ ,  $N = 1050$

**A1L4H1 NP2**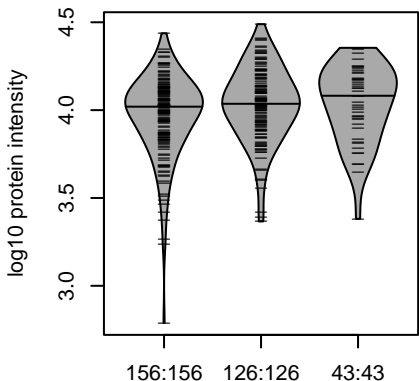

rs8103017  
 $p = 0.074$ ,  $\beta = 0.14$ ,  $N = 325$

**VMACEPPALVELVAAVR pc3**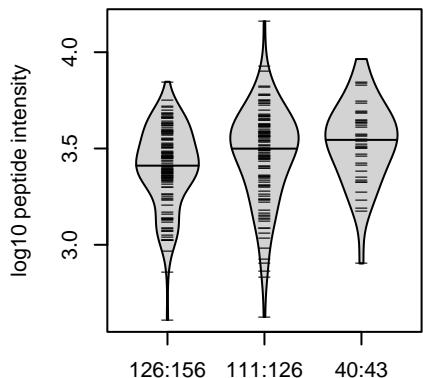

rs8103017  
 $p = 0.0067$ ,  $\beta = 0.225$ ,  $N = 277$

**GLGQLGEAVK pc2**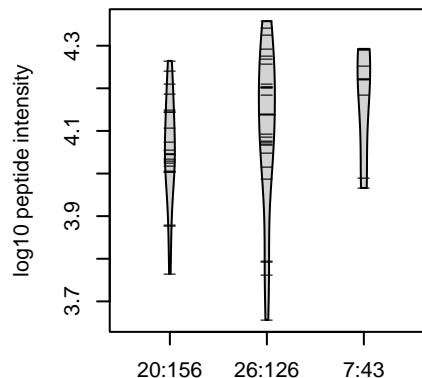

rs8103017  
 $p = 0.024$ ,  $\beta = 0.433$ ,  $N = 53$

**LEVWHGGR pc2**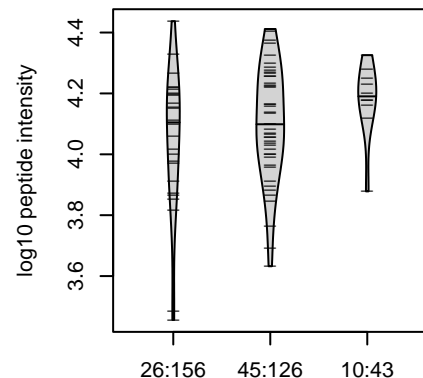

rs8103017  
 $p = 0.031$ ,  $\beta = 0.359$ ,  $N = 81$

**WGTVCDDGWDLR pc2**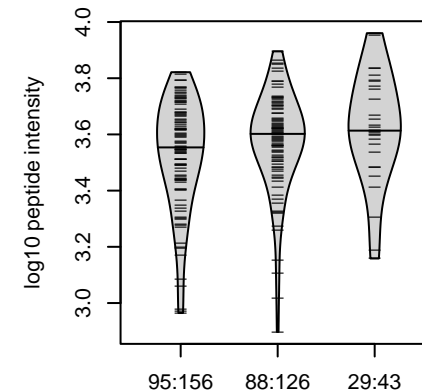

rs8103017  
 $p = 0.049$ ,  $\beta = 0.189$ ,  $N = 212$

Locus: 158 (Sort: 183)  
 Status: Not replicated  
 80% power: No  
 SNP: 19:55999142:C:G  
 rsID: rs8103017  
 UniProtID: A1L4H1  
 HGNC gene: SSC5D  
 Type: Cis-pQTL

**LEFTY1 [cis]**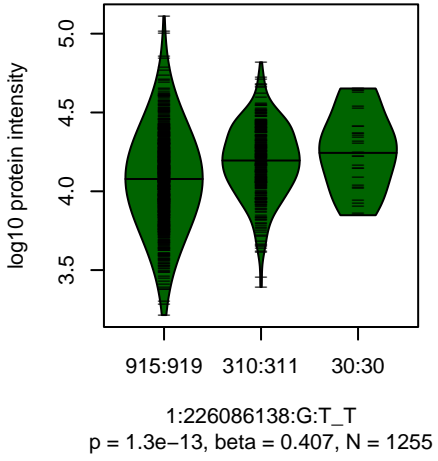**QPLLLQSVQR pc2**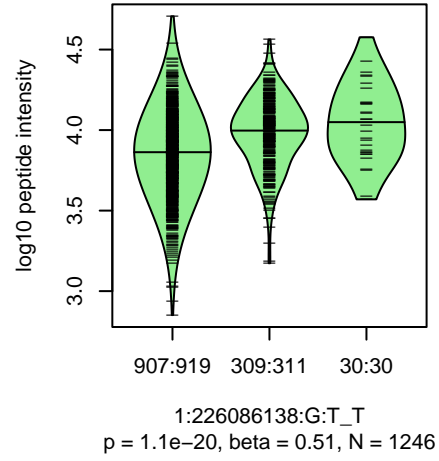**AFDVTEAVNFWQQLSRPR pc3**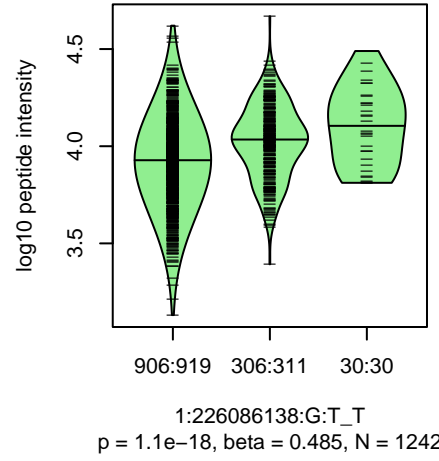**EVPTLDRADMEELVIPTHVR pc4**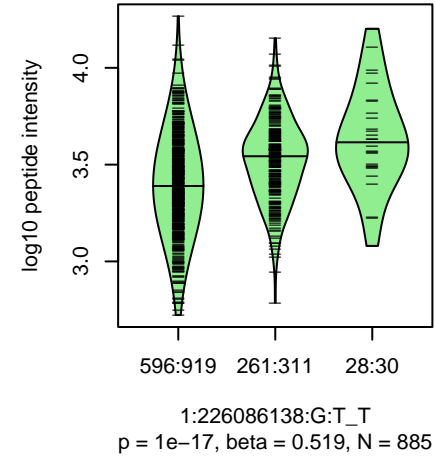**AQYVALLQR pc2**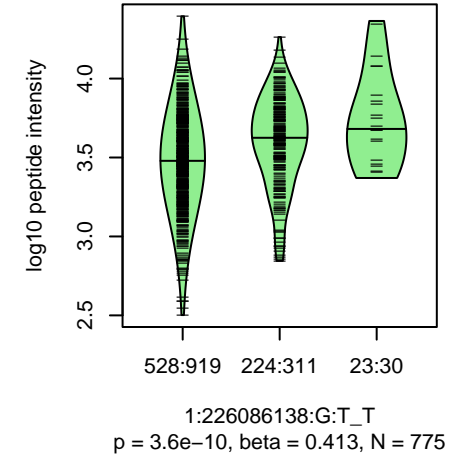**O75610 NP1**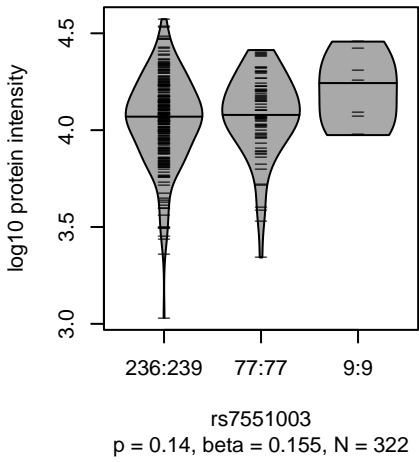**VTVEWLR pc2**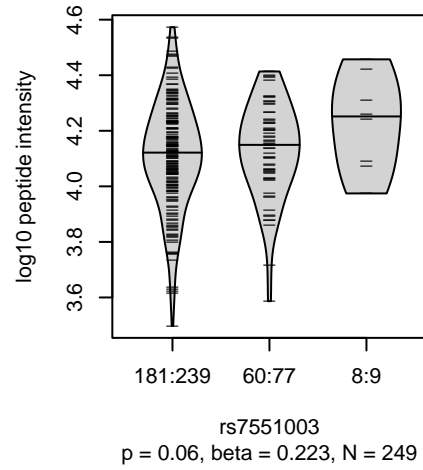**AFDVTEAVNFWQQLSRPR pc3**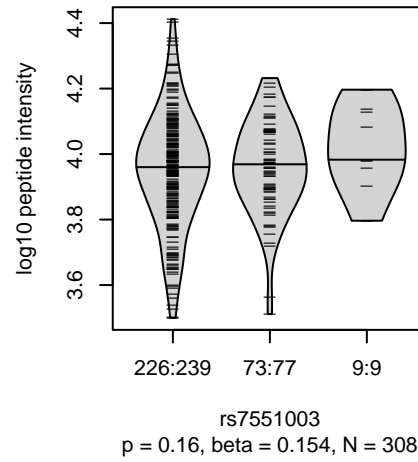**AQYVALLQR pc2**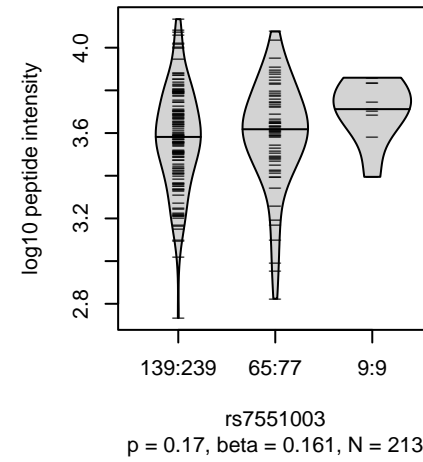**QPLLLQSVQR pc2**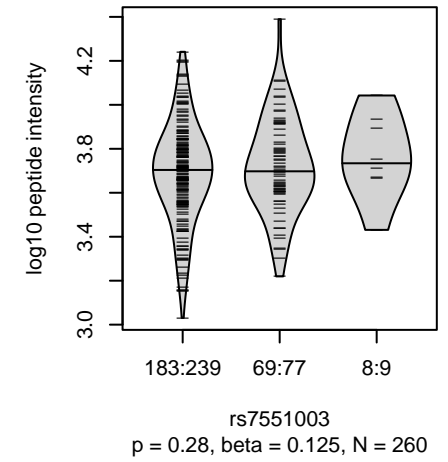

Locus: 159 (Sort: 184)  
 Status: Not replicated  
 80% power: No  
 SNP: 1:226086138:G:T  
 rsID: rs7551003  
 UniProtID: O75610  
 HGNC gene: LEFTY1  
 Type: Cis-pQTL

**HSP90B1 [cis]**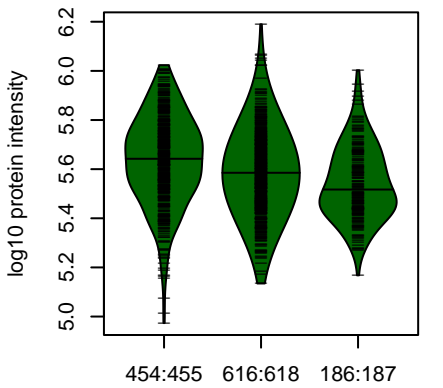

12:104304835:G:T\_T  
 $p = 1.4e-13$ ,  $\beta = -0.302$ ,  $N = 1256$

**DISTNYASQK pc2**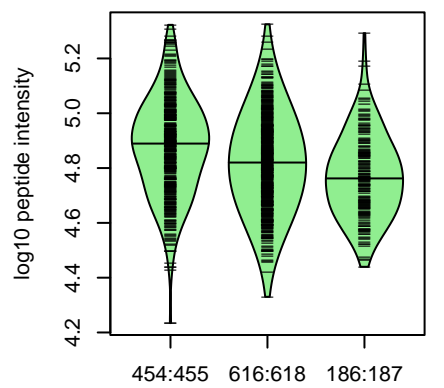

12:104304835:G:T\_T  
 $p = 7.1e-16$ ,  $\beta = -0.329$ ,  $N = 1256$

**SILFVPTSAPR pc2**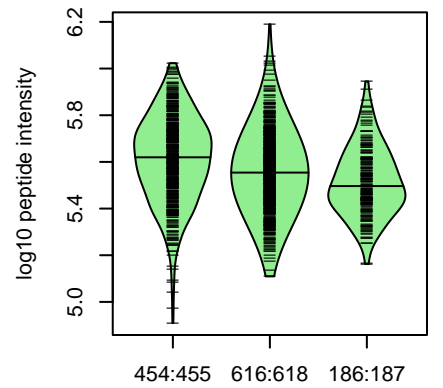

12:104304835:G:T\_T  
 $p = 1.3e-13$ ,  $\beta = -0.302$ ,  $N = 1256$

**YNDTFWK pc2**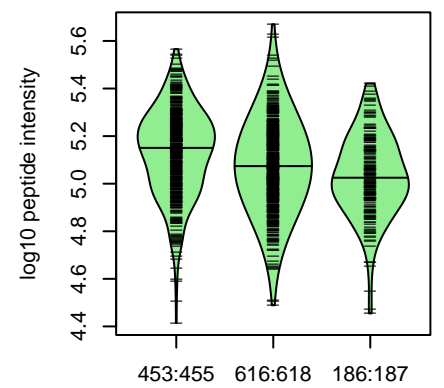

12:104304835:G:T\_T  
 $p = 1.6e-13$ ,  $\beta = -0.301$ ,  $N = 1255$

**RVFITDDFHDMMPK pc3**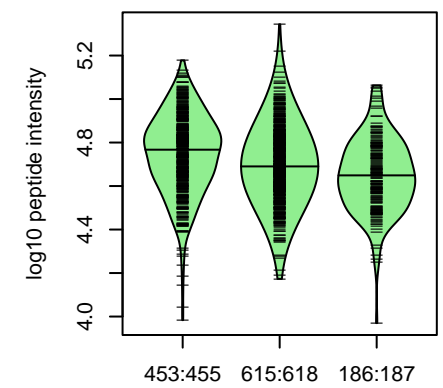

12:104304835:G:T\_T  
 $p = 3e-13$ ,  $\beta = -0.298$ ,  $N = 1254$

**P14625 NP2**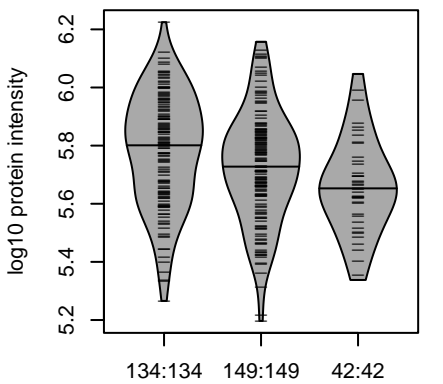

rs2722189  
 $p = 0.0019$ ,  $\beta = -0.251$ ,  $N = 325$

**AQAYQTGK pc2**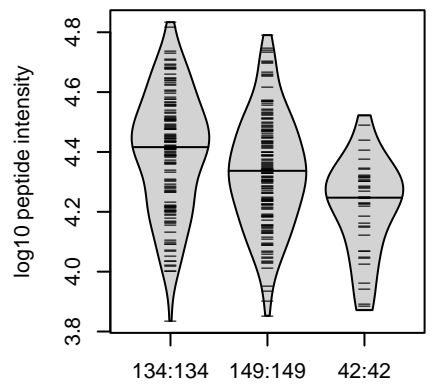

rs2722189  
 $p = 9.4e-07$ ,  $\beta = -0.389$ ,  $N = 325$

**SGYLLPDTK pc2**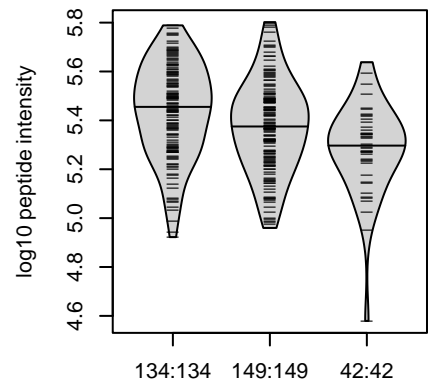

rs2722189  
 $p = 0.00013$ ,  $\beta = -0.306$ ,  $N = 325$

**LGVIEDHSNR pc2**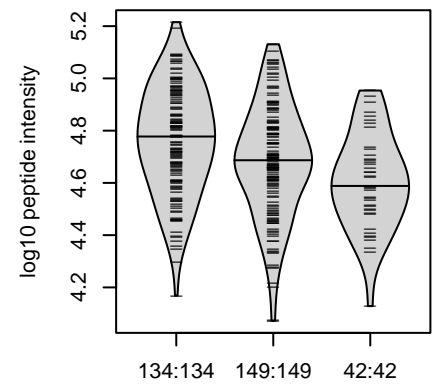

rs2722189  
 $p = 0.00015$ ,  $\beta = -0.302$ ,  $N = 325$

**TFEINPR pc2**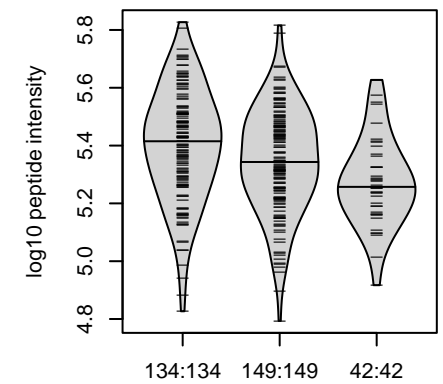

rs2722189  
 $p = 0.00017$ ,  $\beta = -0.301$ ,  $N = 325$

Locus: 160 (Sort: 185)

Status: Not replicated

80% power: No

SNP: 12:104304835:G:T

rsID: rs2722189

UniProtID: P14625

HGNC gene: HSP90B1

Type: Cis-pQTL



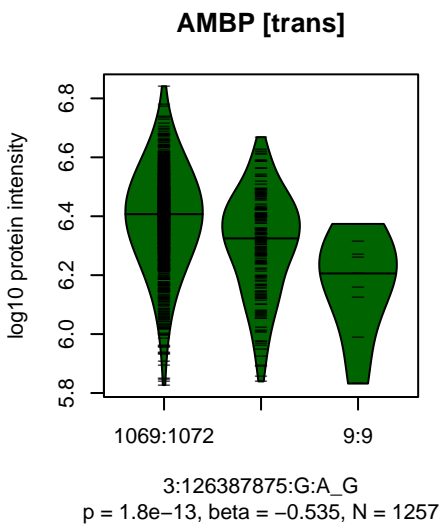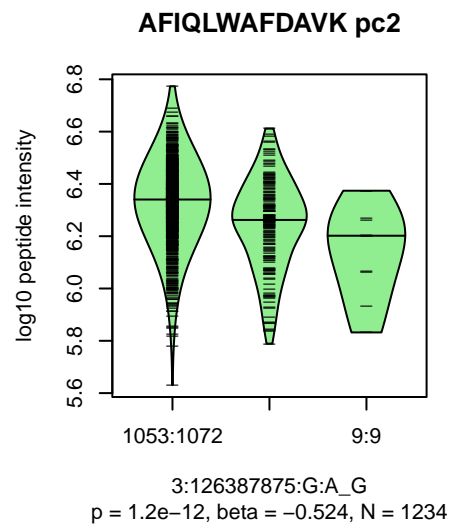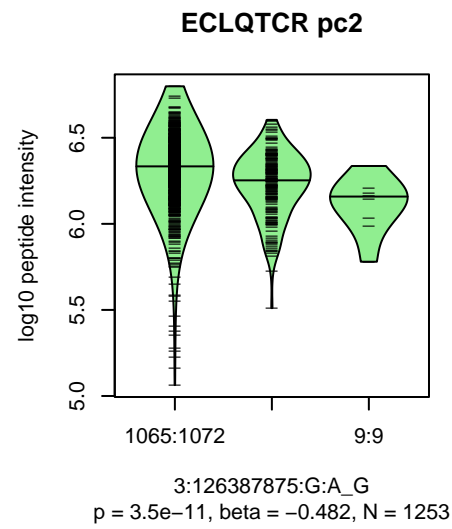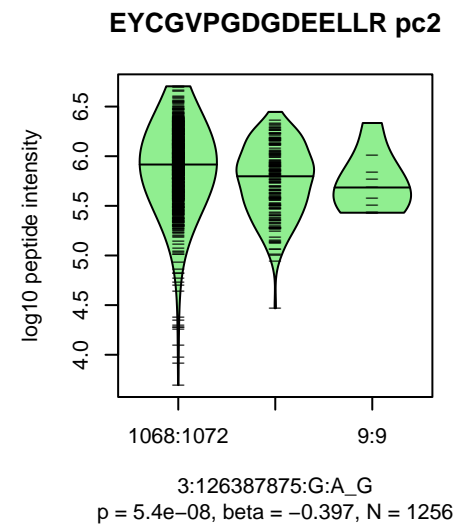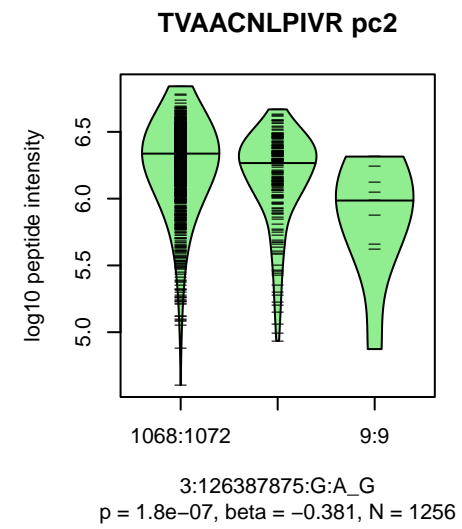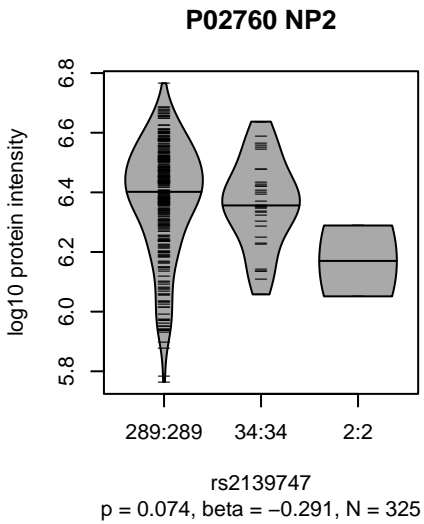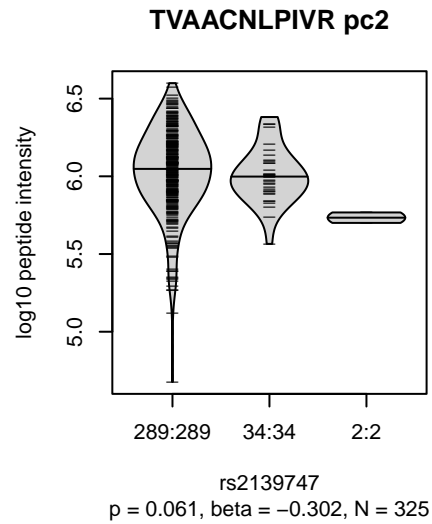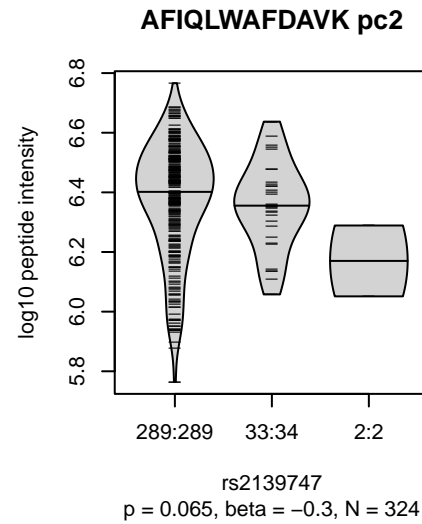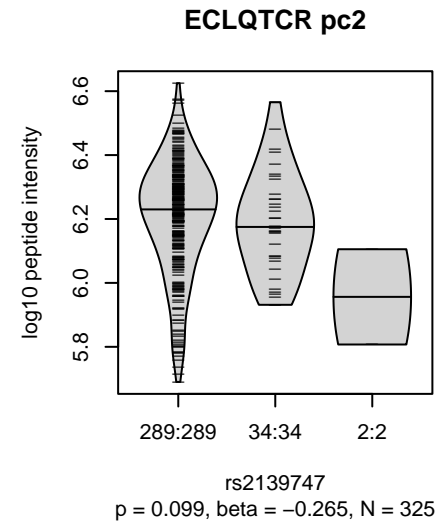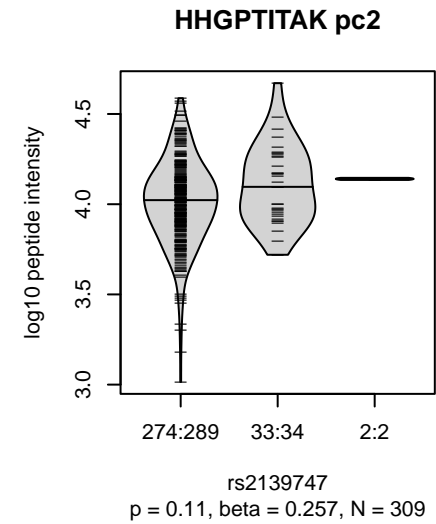

Locus: 161 (Sort: 186)  
 Status: Not replicated  
 80% power: No  
 SNP: 3:126387875:G:A  
 rsID: rs2139747  
 UniProtID: P02760  
 HGNC gene: AMBP  
 Type: Trans-pQTL

### CCDC132 [trans]

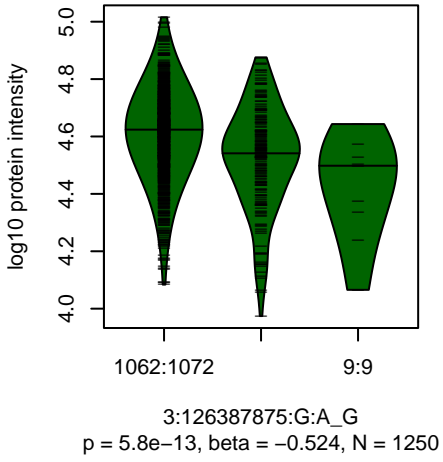

### ALWEVMLSYYR pc2

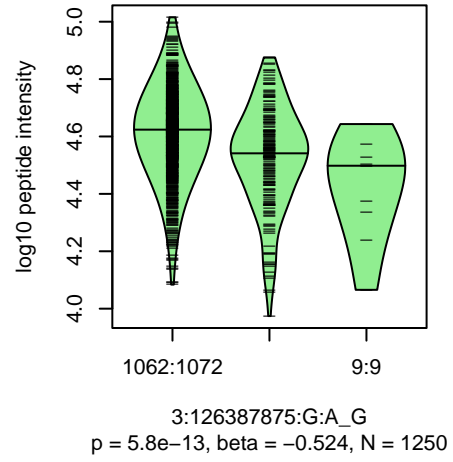

### Q96JG6 NP2

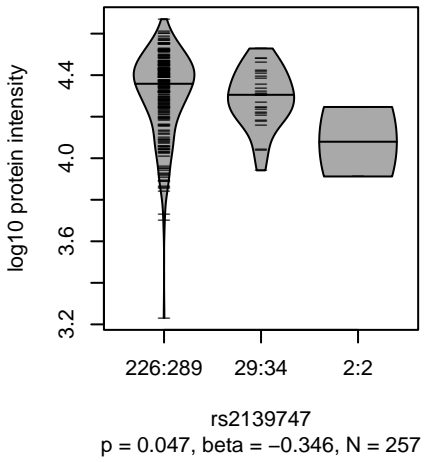

### ALWEVMLSYYR pc2

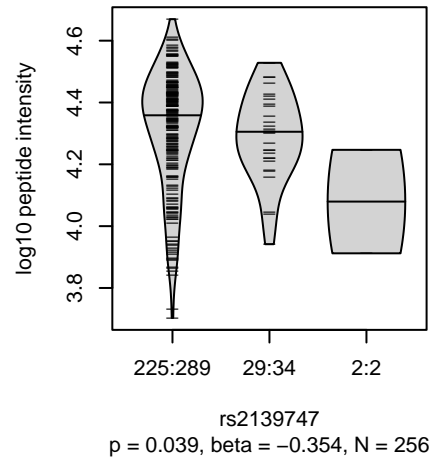

Locus: 161 (Sort: 187)  
Status: Not replicated  
80% power: No  
SNP: 3:126387875:G:A  
rsID: rs2139747  
UniProtID: Q96JG6  
HGNC gene: CCDC132  
Type: Trans-pQTL

**CCL14 [cis]**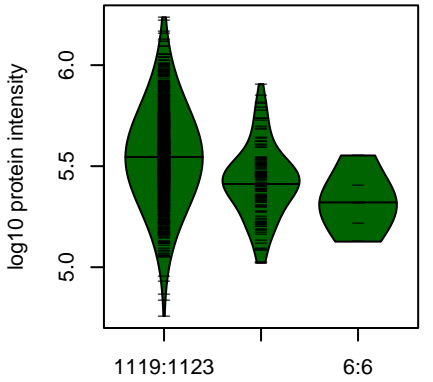

17:34312337:T:C\_C  
 $p = 2e-13$ ,  $\beta = -0.617$ ,  $N = 1255$

**WVQDYIK pc2**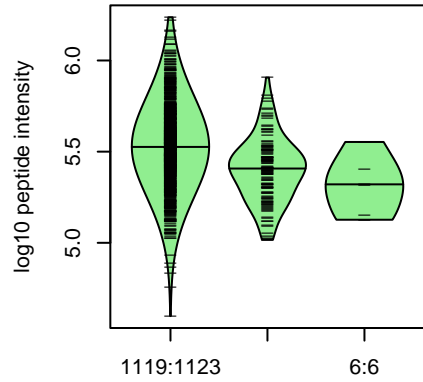

17:34312337:T:C\_C  
 $p = 1e-12$ ,  $\beta = -0.598$ ,  $N = 1255$

**PGIVFITK pc2**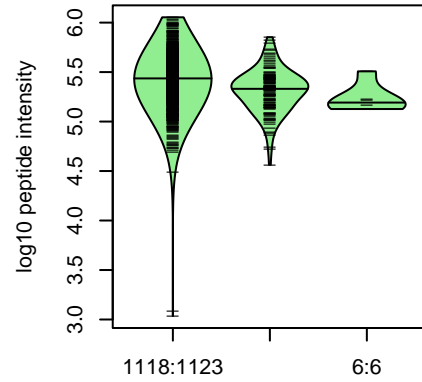

17:34312337:T:C\_C  
 $p = 2.7e-08$ ,  $\beta = -0.469$ ,  $N = 1254$

**IMDYETNSQCSK pc2**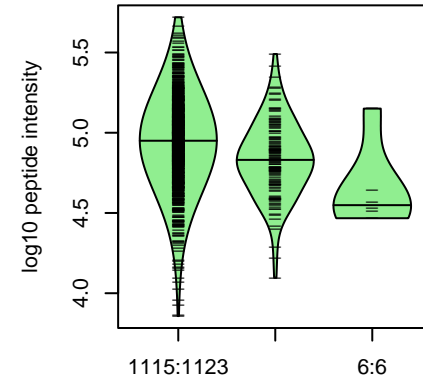

17:34312337:T:C\_C  
 $p = 1.8e-07$ ,  $\beta = -0.44$ ,  $N = 1251$

**GHSVCTNPSDK pc2**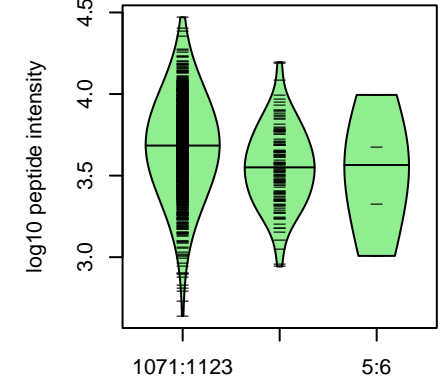

17:34312337:T:C\_C  
 $p = 9e-07$ ,  $\beta = -0.437$ ,  $N = 1194$

**Q16627 NP3**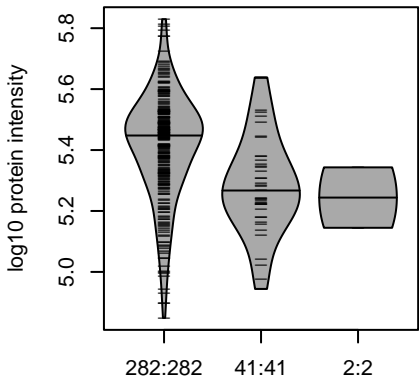

rs9903158  
 $p = 5.6e-05$ ,  $\beta = -0.608$ ,  $N = 325$

**WVQDYIK pc2**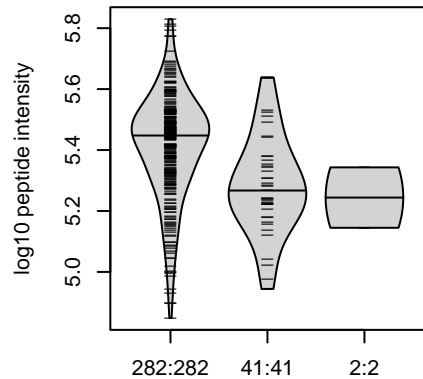

rs9903158  
 $p = 5.3e-05$ ,  $\beta = -0.603$ ,  $N = 325$

**PGIVFITK pc2**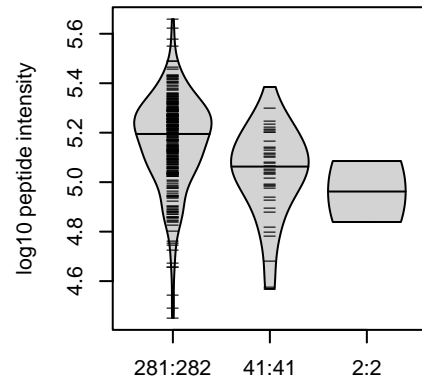

rs9903158  
 $p = 0.00012$ ,  $\beta = -0.576$ ,  $N = 324$

**GHSVCTNPSDK pc2**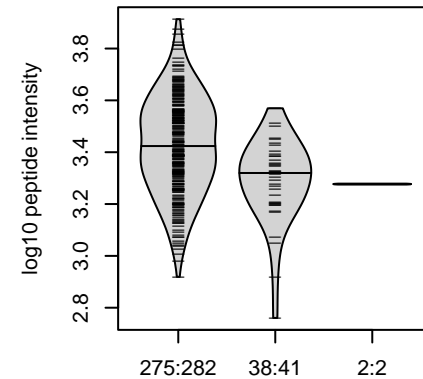

rs9903158  
 $p = 0.00012$ ,  $\beta = -0.591$ ,  $N = 315$

**IMDYETNSQCSK pc2**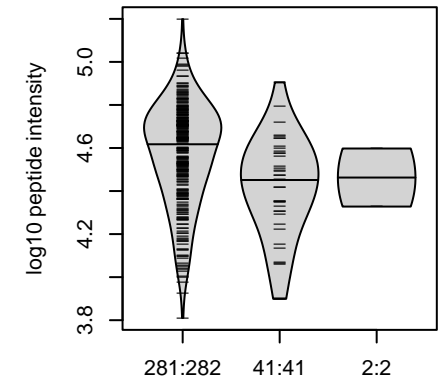

rs9903158  
 $p = 0.00097$ ,  $\beta = -0.494$ ,  $N = 324$

Locus: 162 (Sort: 188)

Status: Replicated

80% power: No

SNP: 17:34312337:T:C

rsID: rs9903158

UniProtID: Q16627

HGNC gene: CCL14

Type: Cis-pQTL

**PEBP4 [cis]**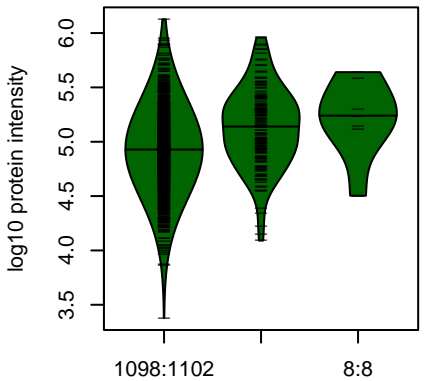

8:22577263:C:T\_T  
 p = 2e-13, beta = 0.574, N = 1255

**IQGQELSAYQAPSPPAHSGFHR pc**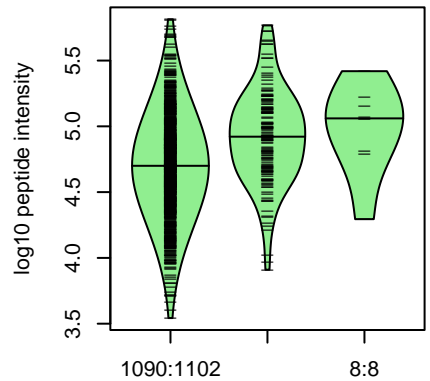

8:22577263:C:T\_T  
 p = 1.3e-14, beta = 0.606, N = 1244

**VVPDCNNYR pc2**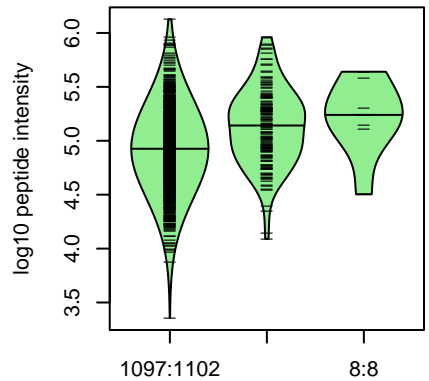

8:22577263:C:T\_T  
 p = 4.9e-14, beta = 0.589, N = 1253

**ITSWMEPIVK pc2**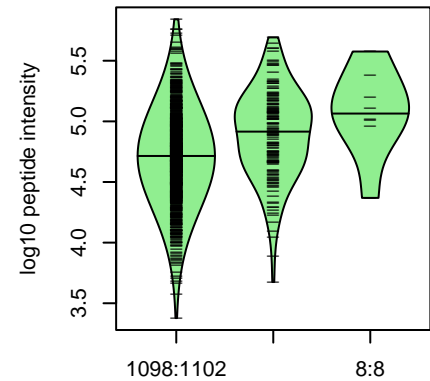

8:22577263:C:T\_T  
 p = 6.5e-14, beta = 0.585, N = 1255

**YQFFVYLQEGK pc2**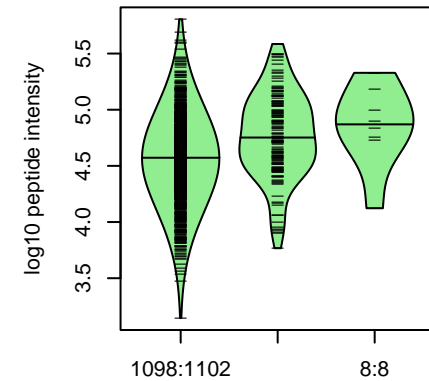

8:22577263:C:T\_T  
 p = 1.2e-13, beta = 0.58, N = 1254

**Q96S96 NP3**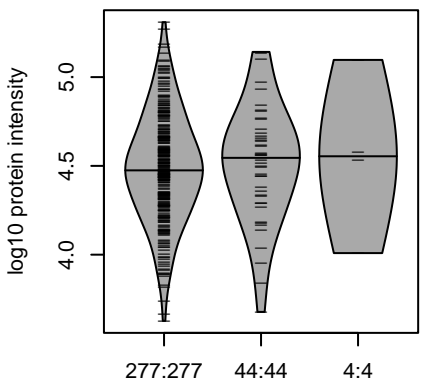

rs13271643  
 p = 0.25, beta = 0.157, N = 325

**HWLVTDIK pc2**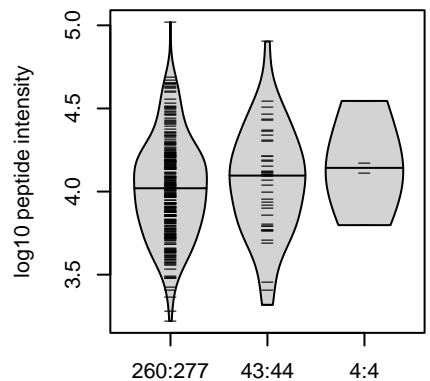

rs13271643  
 p = 0.12, beta = 0.216, N = 307

**FPGAVDGATYILVMVDPDAPSR pc:**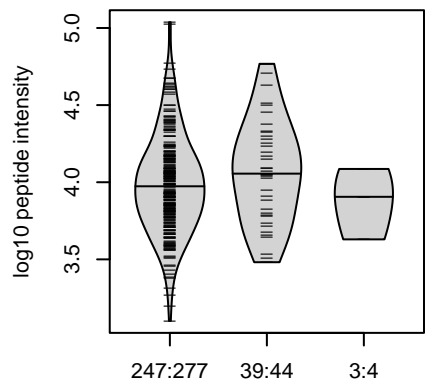

rs13271643  
 p = 0.15, beta = 0.215, N = 289

**ITSWMEPIVK pc2**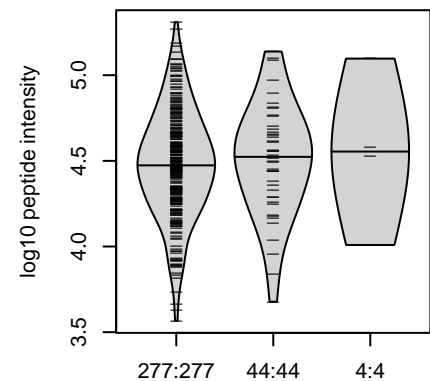

rs13271643  
 p = 0.24, beta = 0.163, N = 325

**YQFFVYLQEGK pc2**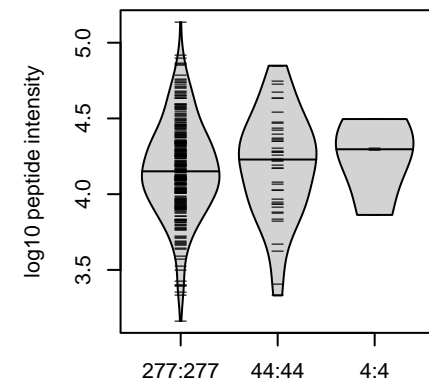

rs13271643  
 p = 0.24, beta = 0.16, N = 325

Locus: 163 (Sort: 189)  
 Status: Not replicated  
 80% power: No  
 SNP: 8:22577263:C:T  
 rsID: rs13271643  
 UniProtID: Q96S96  
 HGNC gene: PEBP4  
 Type: Cis-pQTL

**CFHR4 [cis]**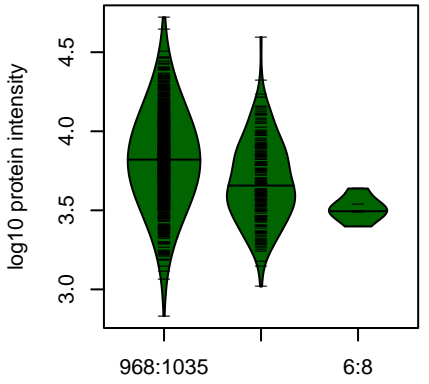

1:196887457:G:A\_A  
 $p = 2e-13$ ,  $\beta = -0.54$ ,  $N = 1165$

**FCDMPVFENSR pc2**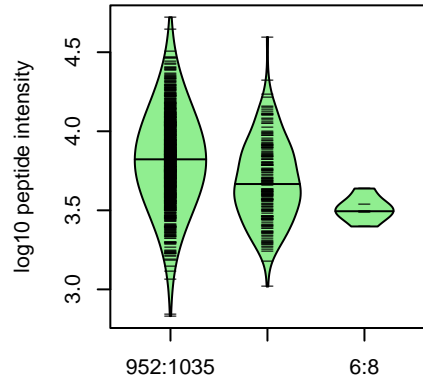

1:196887457:G:A\_A  
 $p = 1.2e-12$ ,  $\beta = -0.528$ ,  $N = 1144$

**VYLPWSR pc2**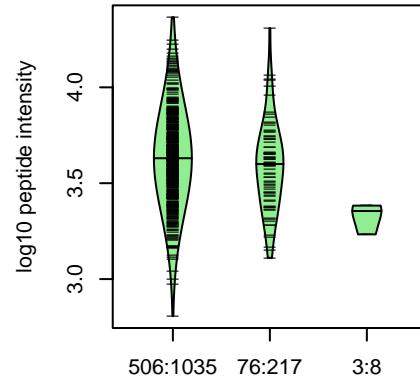

1:196887457:G:A\_A  
 $p = 0.025$ ,  $\beta = -0.253$ ,  $N = 585$

**EGIVEYPRCE pc2**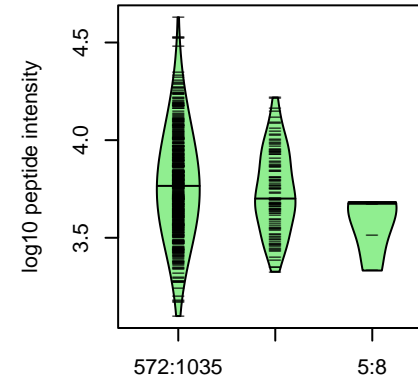

1:196887457:G:A\_A  
 $p = 0.064$ ,  $\beta = -0.175$ ,  $N = 690$

**TGDTIEFMCK pc2**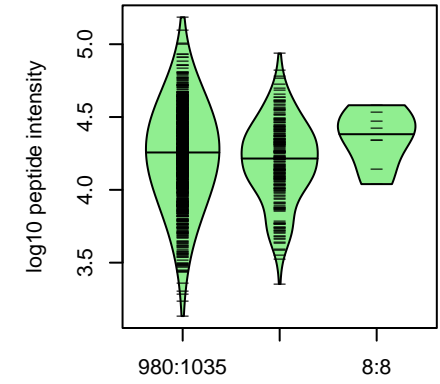

1:196887457:G:A\_A  
 $p = 0.096$ ,  $\beta = -0.117$ ,  $N = 1201$

**Q92496 NP5**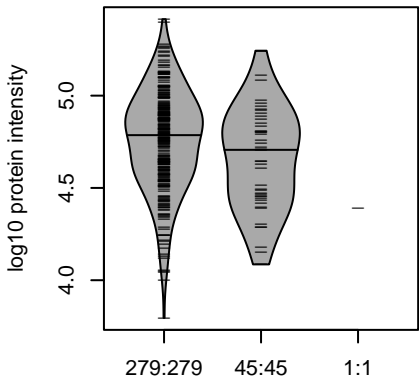

rs10494745  
 $p = 0.002$ ,  $\beta = -0.464$ ,  $N = 325$

**FCDMPVFENSR pc2**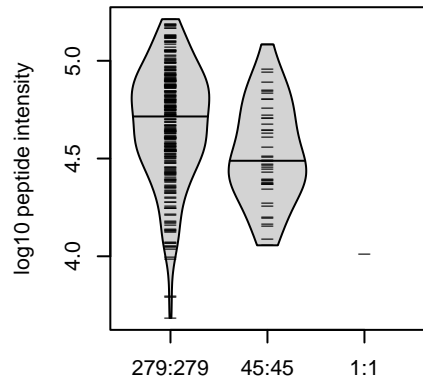

rs10494745  
 $p = 3.4e-06$ ,  $\beta = -0.695$ ,  $N = 325$

**VYLPWSR pc2**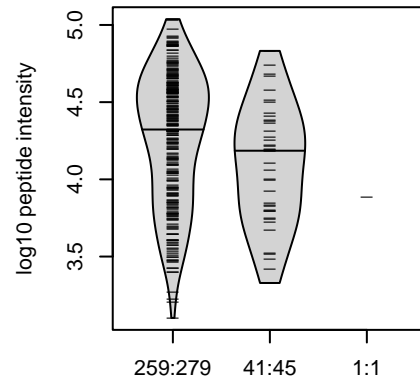

rs10494745  
 $p = 0.0021$ ,  $\beta = -0.483$ ,  $N = 301$

**PCEFPEIQHGHLIYENTR pc4**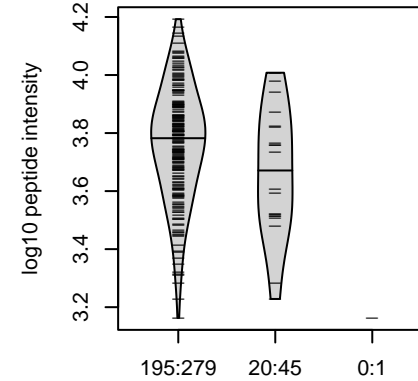

rs10494745  
 $p = 0.0065$ ,  $\beta = -0.623$ ,  $N = 215$

**VEYQCQSYELQGSK pc2**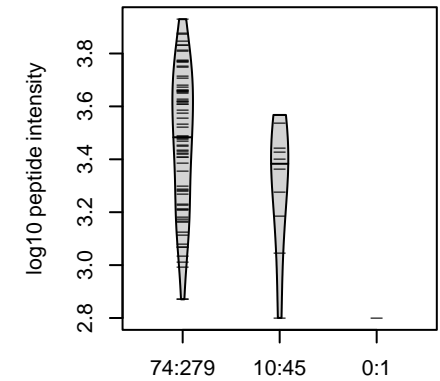

rs10494745  
 $p = 0.024$ ,  $\beta = -0.726$ ,  $N = 84$

Locus: 164 (Sort: 190)

Status: Not replicated

80% power: No

SNP: 1:196887457:G:A

rsID: rs10494745

UniProtID: Q92496

HGNC gene: CFHR4

Type: Cis-pQTL

**IL7R [trans]**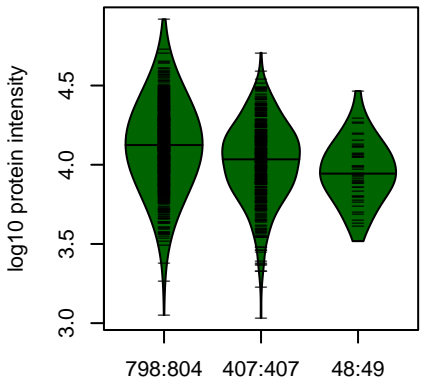

9:136153875:C:T\_T  
 $p = 2.1e-13$ ,  $\beta = -0.363$ ,  $N = 1253$

**LQEIFYETK pc2**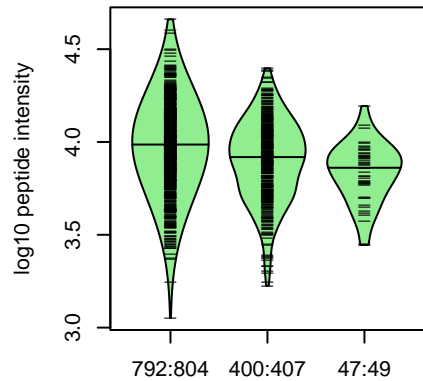

9:136153875:C:T\_T  
 $p = 1.6e-10$ ,  $\beta = -0.319$ ,  $N = 1239$

**VLMHDVAYR pc2**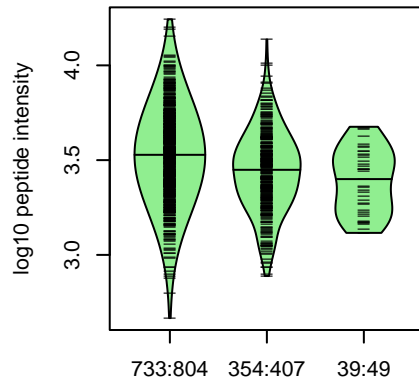

9:136153875:C:T\_T  
 $p = 1.7e-10$ ,  $\beta = -0.34$ ,  $N = 1126$

**SIPDHYFK pc2**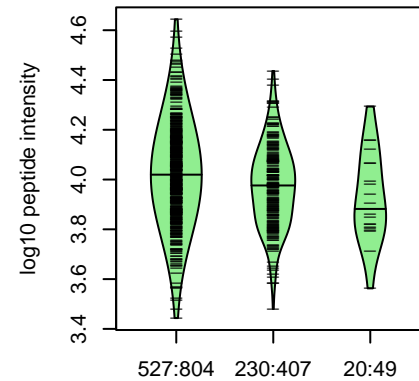

9:136153875:C:T\_T  
 $p = 7.7e-05$ ,  $\beta = -0.266$ ,  $N = 777$

**LQPAAMYEIK pc2**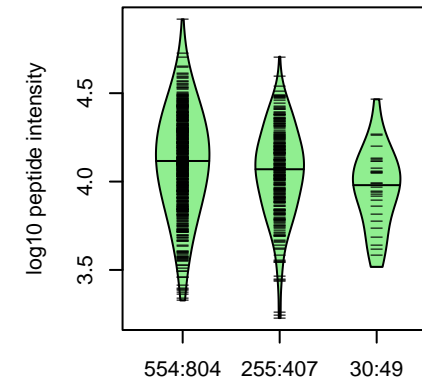

9:136153875:C:T\_T  
 $p = 0.00071$ ,  $\beta = -0.209$ ,  $N = 839$

**P16871 NP2**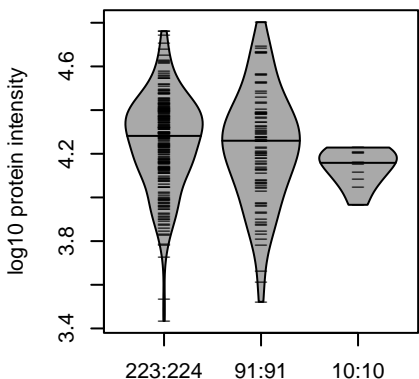

rs651007  
 $p = 0.087$ ,  $\beta = -0.177$ ,  $N = 324$

**LQEIFYETK pc2**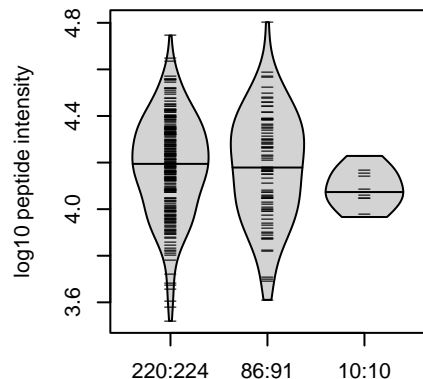

rs651007  
 $p = 0.37$ ,  $\beta = -0.0923$ ,  $N = 316$

**LQPAAMYEIK pc2**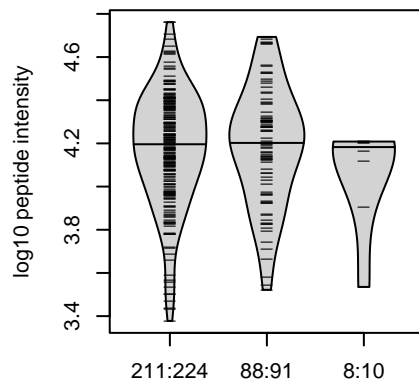

rs651007  
 $p = 0.9$ ,  $\beta = -0.0137$ ,  $N = 307$

**VLMHDVAYR pc2**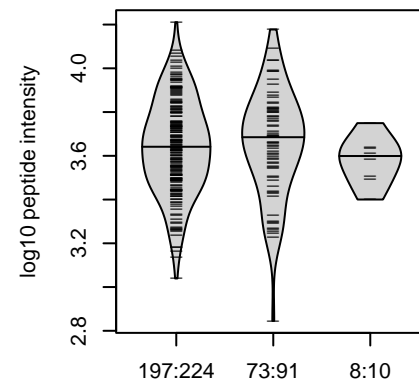

rs651007  
 $p = 1$ ,  $\beta = -0.000593$ ,  $N = 278$

Locus: 165 (Sort: 191)  
 Status: Not replicated  
 80% power: No  
 SNP: 9:136153875:C:T  
 rsID: rs651007  
 UniProtID: P16871  
 HGNC gene: IL7R  
 Type: Trans-pQTL

**ANXA5 [cis]**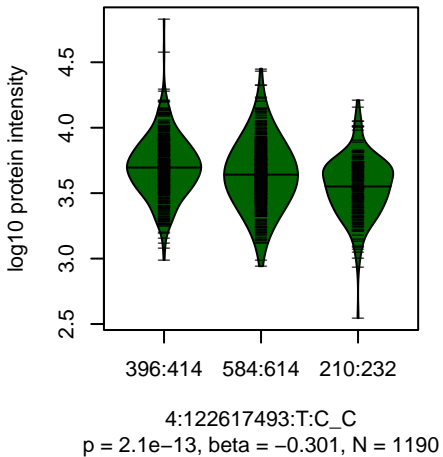**FITIFGTR pc2**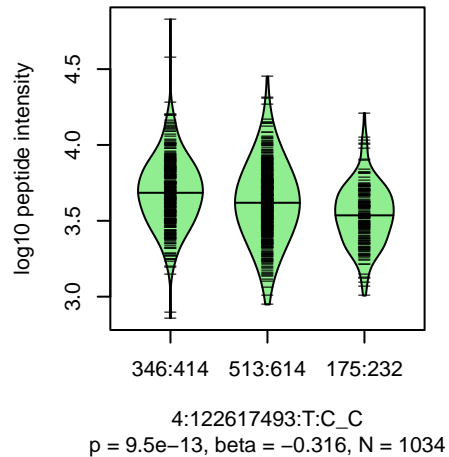**GTVTDFPGFDER pc2**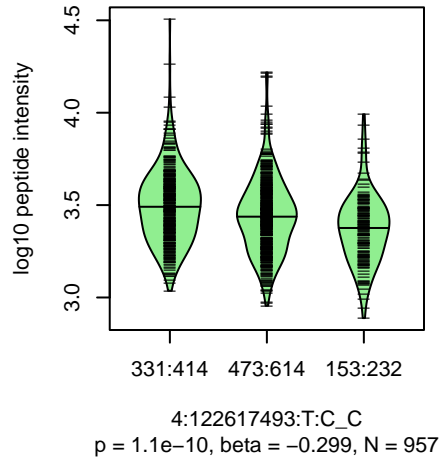**SEIDLFNIR pc2**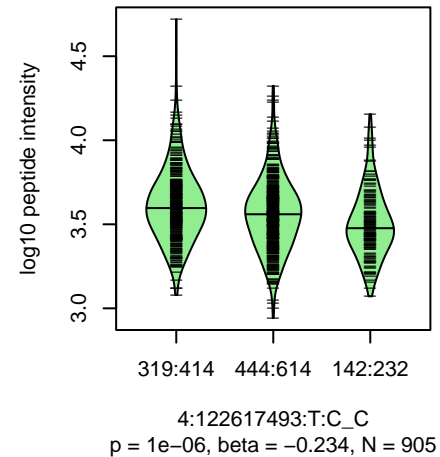**VLTEIIASR pc2**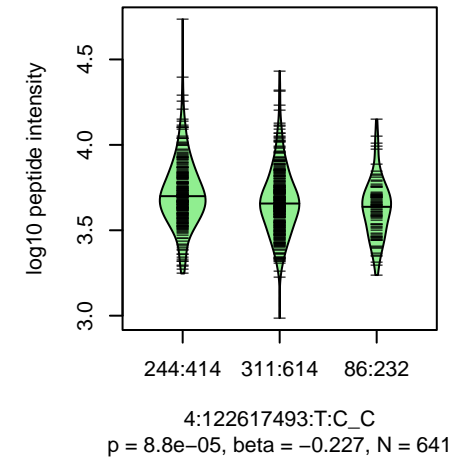**P08758 NP1**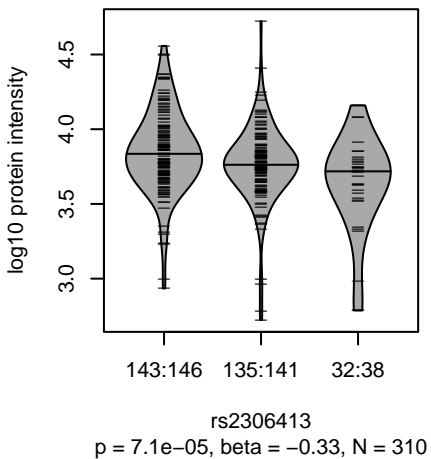**GTVTDFPGFDER pc2**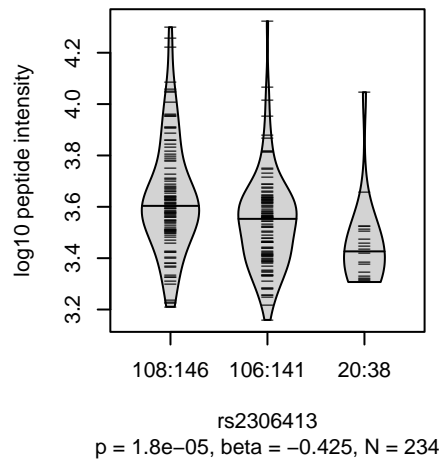**FITIFGTR pc2**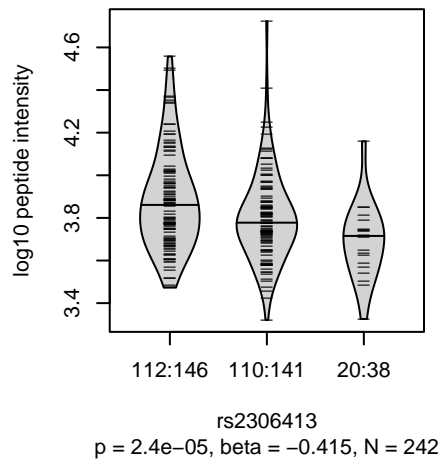**GLGTDEESILTLTSLR pc2**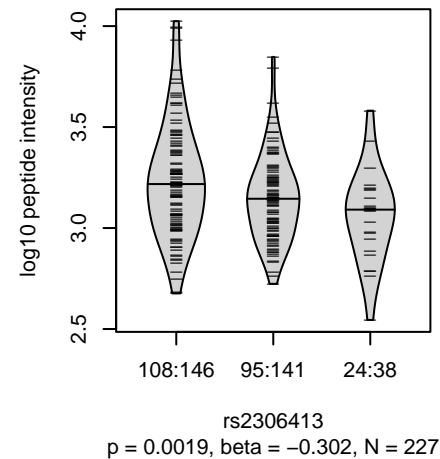**SEIDLFNIR pc2**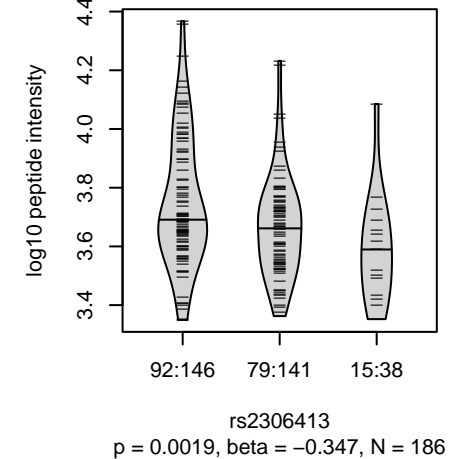

Locus: 166 (Sort: 192)  
 Status: Replicated  
 80% power: No  
 SNP: 4:122617493:T:C  
 rsID: rs2306413  
 UniProtID: P08758  
 HGNC gene: ANXA5  
 Type: Cis-pQTL

**TAC3 [cis]**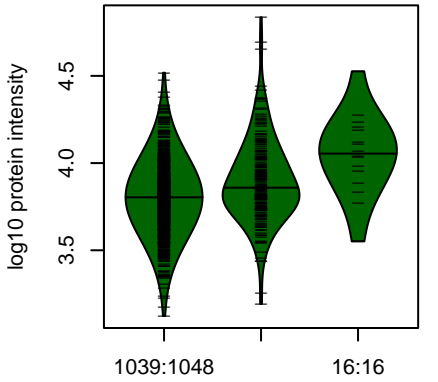

12:57216590:C:T\_T  
 $p = 2.2e-13$ ,  $\beta = 0.491$ ,  $N = 1249$

**ALSQASTDPK pc2**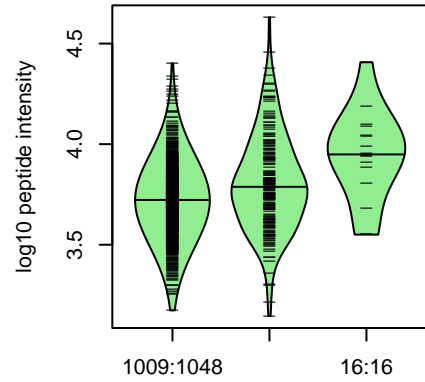

12:57216590:C:T\_T  
 $p = 1.4e-11$ ,  $\beta = 0.455$ ,  $N = 1217$

**DPDLYQLLQR pc2**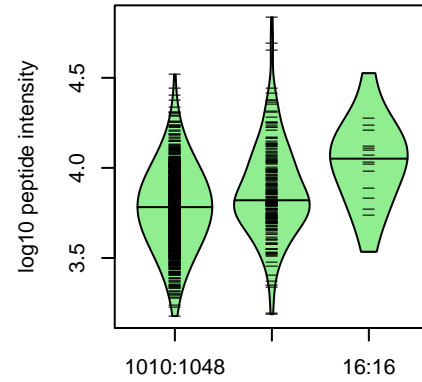

12:57216590:C:T\_T  
 $p = 1.6e-11$ ,  $\beta = 0.455$ ,  $N = 1217$

**EPQEEVPGGGR pc2**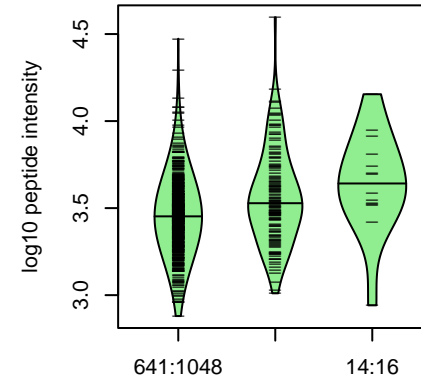

12:57216590:C:T\_T  
 $p = 2.6e-07$ ,  $\beta = 0.403$ ,  $N = 792$

**SHSSLEGLLK pc2**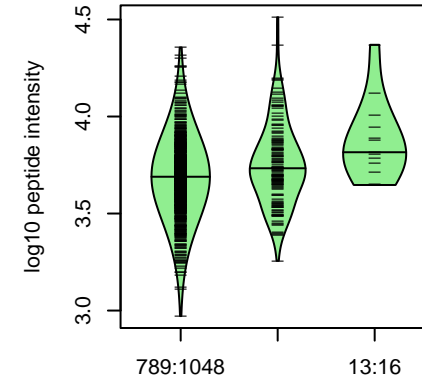

12:57216590:C:T\_T  
 $p = 6.1e-06$ ,  $\beta = 0.35$ ,  $N = 943$

**Q9UHF0 NP2**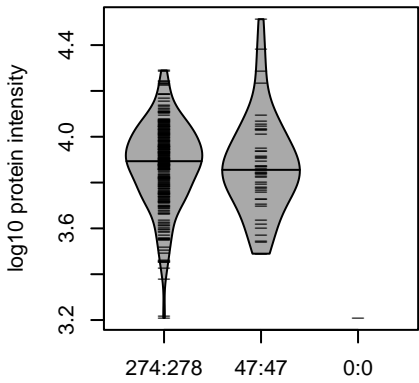

rs113940456  
 $p = 0.58$ ,  $\beta = -0.0856$ ,  $N = 321$

**EPQEEVPGGGR pc2**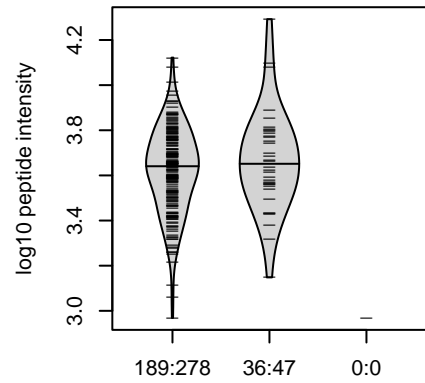

rs113940456  
 $p = 0.15$ ,  $\beta = 0.26$ ,  $N = 225$

**ALSQASTDPK pc2**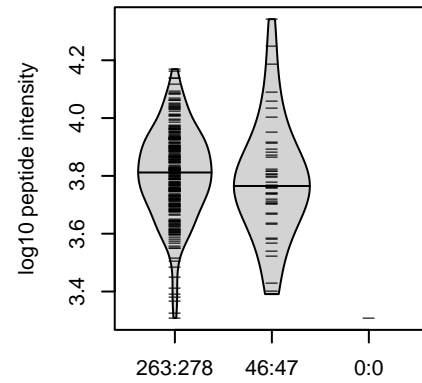

rs113940456  
 $p = 0.33$ ,  $\beta = -0.153$ ,  $N = 309$

**DPDLYQLLQR pc2**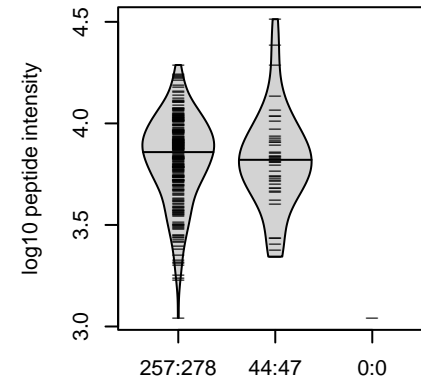

rs113940456  
 $p = 0.66$ ,  $\beta = -0.0716$ ,  $N = 301$

**SHSSLEGLLK pc2**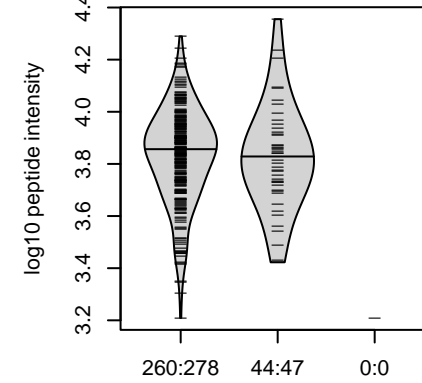

rs113940456  
 $p = 0.69$ ,  $\beta = -0.0642$ ,  $N = 304$

Locus: 167 (Sort: 193)

Status: Not replicated

80% power: No

SNP: 12:57216590:C:T

rsID: rs113940456

UniProtID: Q9UHF0

HGNC gene: TAC3

Type: Cis-pQTL



**HLA-A [cis]**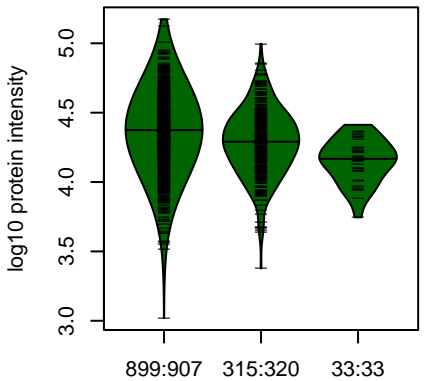

6:31323567:G:A\_A  
 $p = 2.2e-13$ ,  $\beta = -0.398$ ,  $N = 1247$

**FIAGYVDDTQFVR pc2**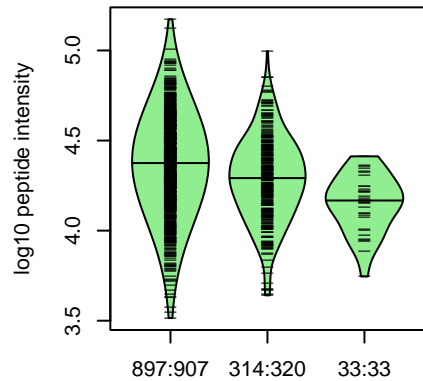

6:31323567:G:A\_A  
 $p = 1.2e-13$ ,  $\beta = -0.403$ ,  $N = 1244$

**YTCHVQHEGLPK pc3**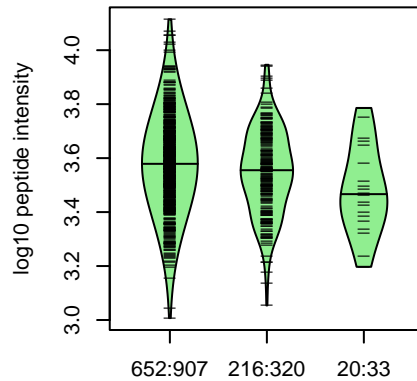

6:31323567:G:A\_A  
 $p = 0.00023$ ,  $\beta = -0.245$ ,  $N = 888$

**AYLDGTCVEWLR pc2**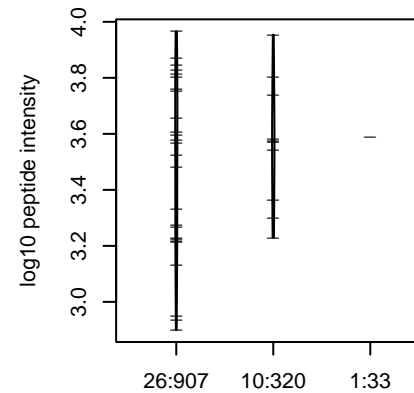

6:31323567:G:A\_A  
 $p = 0.032$ ,  $\beta = 0.617$ ,  $N = 37$

**DYIALNEDLR pc2**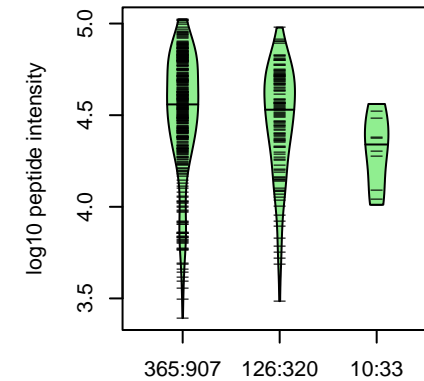

6:31323567:G:A\_A  
 $p = 0.076$ ,  $\beta = -0.158$ ,  $N = 501$

**Q5SRN5 NP1**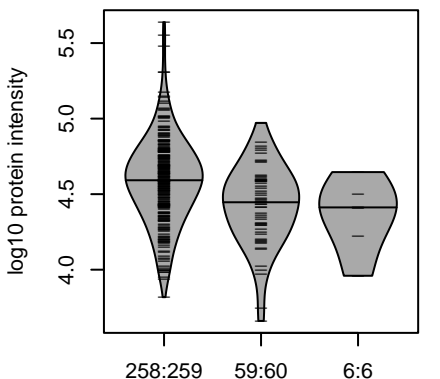

rs4081560  
 $p = 5.5e-05$ ,  $\beta = -0.478$ ,  $N = 323$

**FIAGYVDDTQFVR pc2**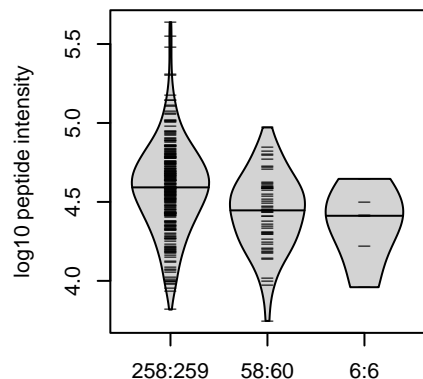

rs4081560  
 $p = 0.00016$ ,  $\beta = -0.452$ ,  $N = 322$

**DYIALNEDLR pc2**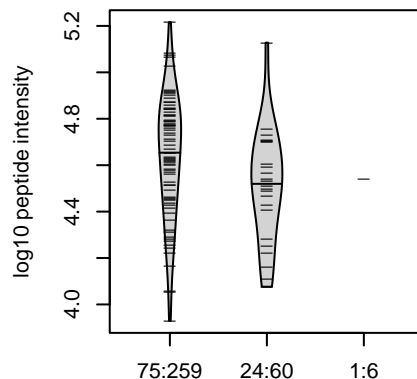

rs4081560  
 $p = 0.066$ ,  $\beta = -0.384$ ,  $N = 100$

**THMTHHPISDHEATLR pc4**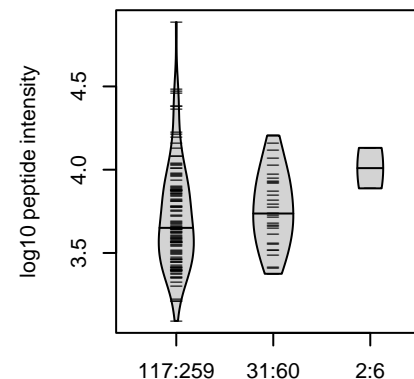

rs4081560  
 $p = 0.099$ ,  $\beta = 0.29$ ,  $N = 150$

**YTCHVQHEGLPK pc3**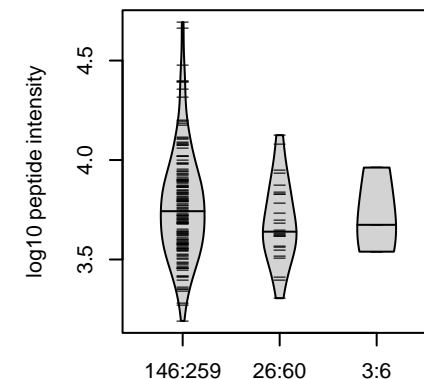

rs4081560  
 $p = 0.23$ ,  $\beta = -0.208$ ,  $N = 175$

**SWTAADMAAQITQR pc2  
rs1059517 ALT**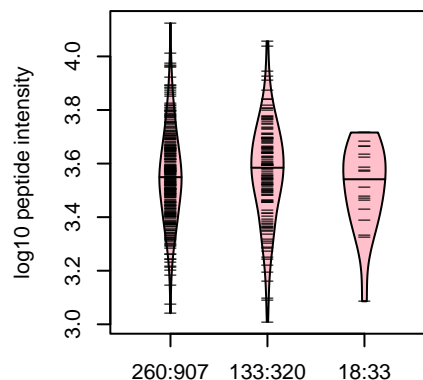

6:31323567:G:A\_A  
 $p = 2.6e-06$ ,  $\text{model} = \text{REC}$ ,  $N = 411$

**SWTAADMAAQITK pc2  
rs1059517 REF**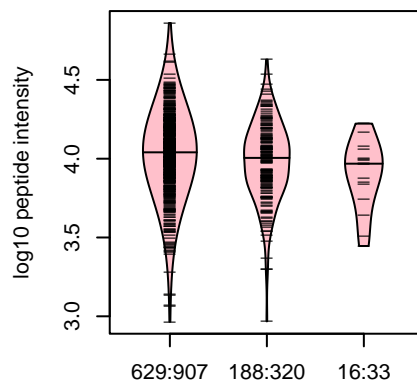

6:31323567:G:A\_A  
 $p = 0.00012$ ,  $\text{model} = \text{REC}$ ,  $N = 833$

**AQSQTDRVDLGLTLR pc3  
rs1071742;rs199474457 REF**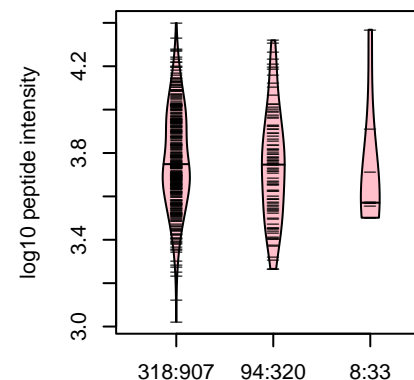

6:31323567:G:A\_A  
 $p = 0.039$ ,  $\text{model} = \text{REC}$ ,  $N = 420$

**FSDAASQR pc2  
rs707910 REF**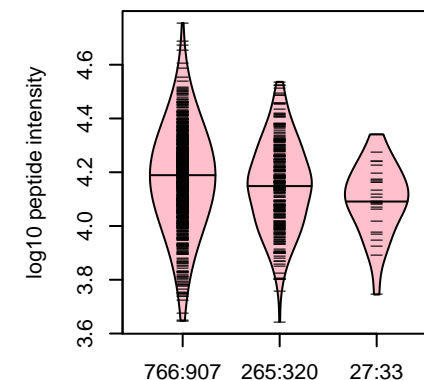

6:31323567:G:A\_A  
 $p = 0.44$ ,  $\text{model} = \text{REC}$ ,  $N = 1058$

Locus: 168 (Sort: 194)  
 Status: Replicated  
 80% power: No  
 SNP: 6:31323567:G:A  
 rsID: rs4081560  
 UniProtID: Q5SRN5  
 HGNC gene: HLA-A  
 Type: Cis-pQTL

### HLA-G [cis]

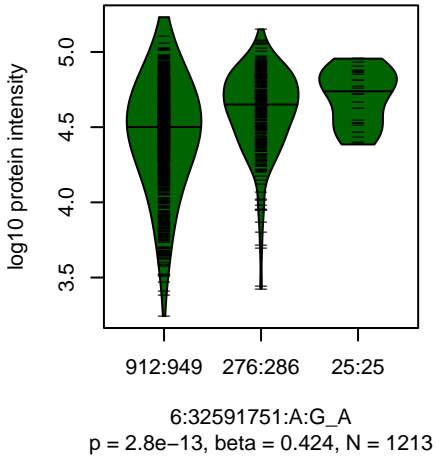

### DYLALNEDLR pc2

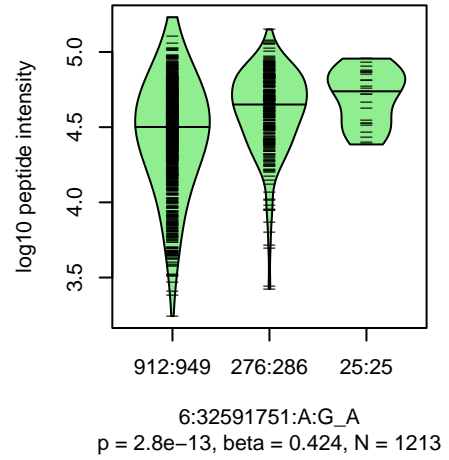

### Q5RJ85 NP1

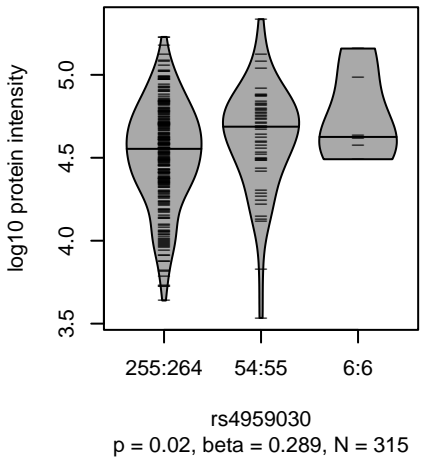

### DYLALNEDLR pc2

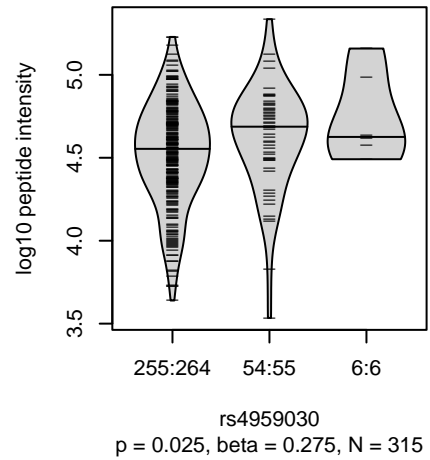

Locus: 169 (Sort: 195)  
Status: Not replicated  
80% power: No  
SNP: 6:32591751:A:G  
rsID: rs4959030  
UniProtID: Q5RJ85  
HGNC gene: HLA-G  
Type: Cis-pQTL

### WAAVVPSGEEQR pc2 rs707908;rs1736924 ALT

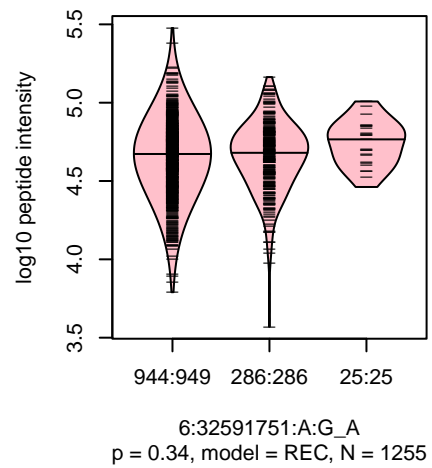

**ECM2 [cis]**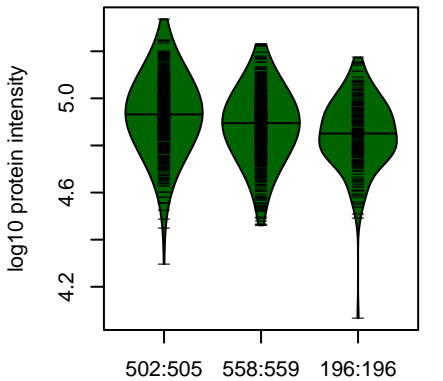

9:95281459:A:G\_G  
 $p = 3.7e-13$ ,  $\beta = -0.287$ ,  $N = 1256$

**LYHVPSYLPK pc3**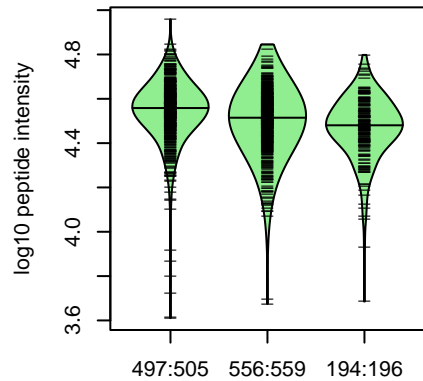

9:95281459:A:G\_G  
 $p = 7.3e-14$ ,  $\beta = -0.297$ ,  $N = 1247$

**SLHLVLLGNQIER pc3**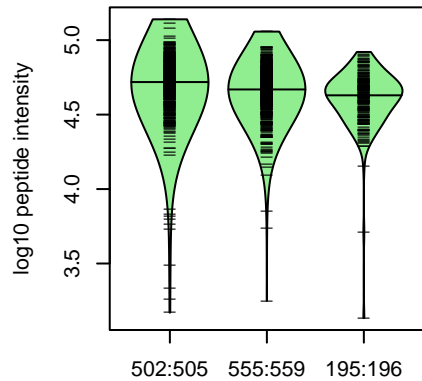

9:95281459:A:G\_G  
 $p = 9.6e-14$ ,  $\beta = -0.294$ ,  $N = 1252$

**VLCDETMCHPQR pc3**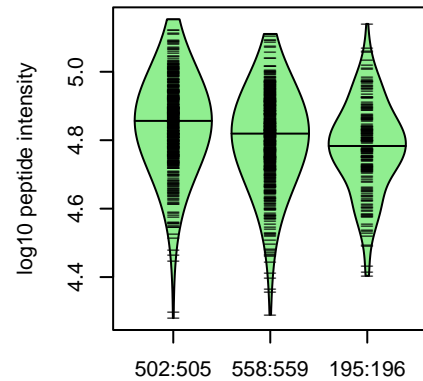

9:95281459:A:G\_G  
 $p = 8.7e-12$ ,  $\beta = -0.27$ ,  $N = 1255$

**QLPPPQVGMDR pc2**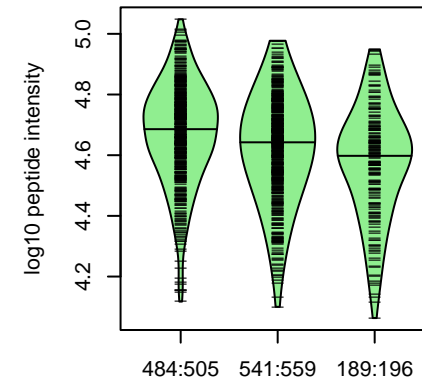

9:95281459:A:G\_G  
 $p = 1.4e-11$ ,  $\beta = -0.272$ ,  $N = 1214$

**O94769 NP2**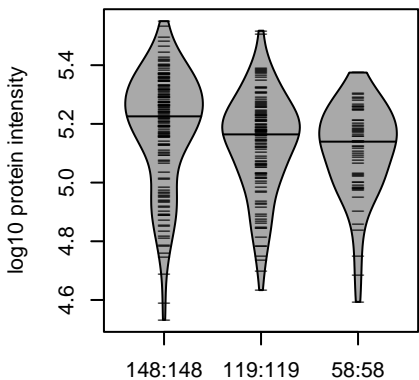

rs12338938  
 $p = 0.0026$ ,  $\beta = -0.221$ ,  $N = 325$

**QLPPPQVGMDR pc2**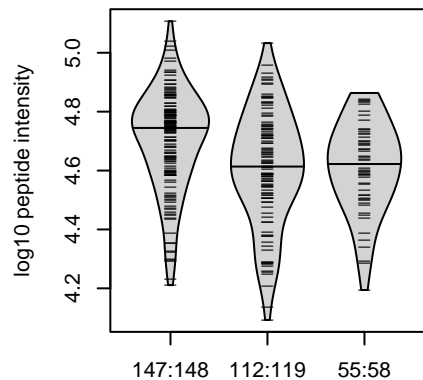

rs12338938  
 $p = 1.8e-05$ ,  $\beta = -0.316$ ,  $N = 314$

**VLCDETMCHPQR pc3**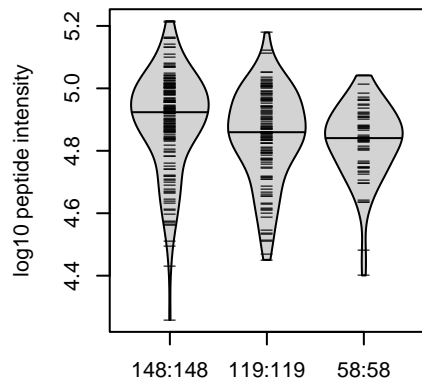

rs12338938  
 $p = 0.00036$ ,  $\beta = -0.26$ ,  $N = 325$

**NQGQLYSEGDSR pc2**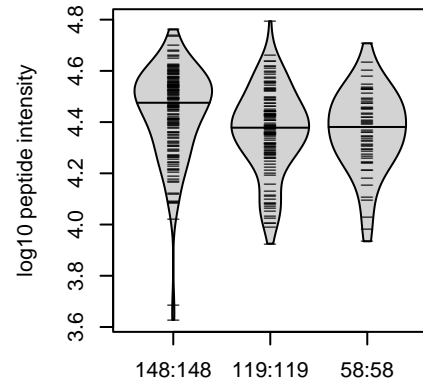

rs12338938  
 $p = 0.00063$ ,  $\beta = -0.249$ ,  $N = 325$

**EPTNLLHK pc2**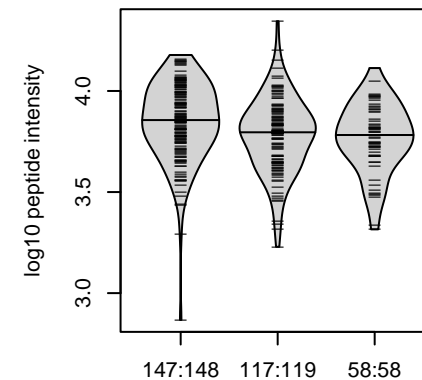

rs12338938  
 $p = 0.0014$ ,  $\beta = -0.234$ ,  $N = 322$

Locus: 170 (Sort: 196)  
 Status: Not replicated  
 80% power: No  
 SNP: 9:95281459:A:G  
 rsID: rs12338938  
 UniProtID: O94769  
 HGNC gene: ECM2  
 Type: Cis-pQTL

**SFTPD [cis]**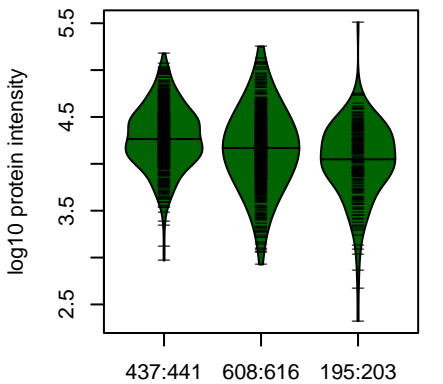

10:81318820:G:A\_G  
 $p = 4.1e-13$ ,  $\beta = -0.296$ ,  $N = 1240$

**SAAENAALQQLVVAK pc2**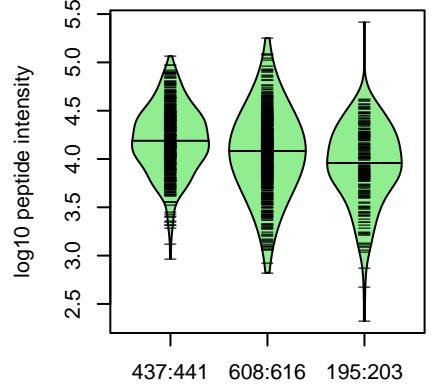

10:81318820:G:A\_G  
 $p = 1.8e-13$ ,  $\beta = -0.3$ ,  $N = 1240$

**NEAAFLSMTDSK pc2**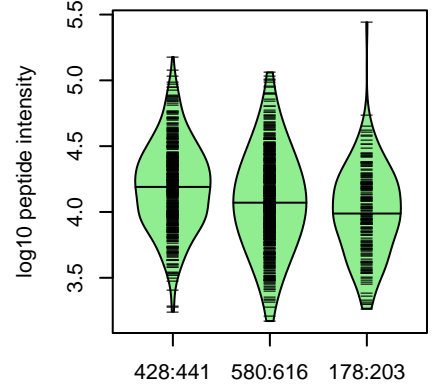

10:81318820:G:A\_G  
 $p = 6.4e-10$ ,  $\beta = -0.26$ ,  $N = 1186$

**QGNIGPQGK pc2**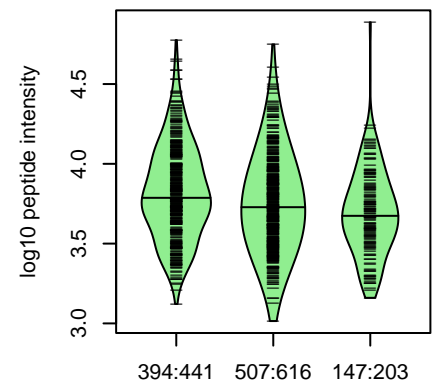

10:81318820:G:A\_G  
 $p = 4e-06$ ,  $\beta = -0.208$ ,  $N = 1048$

**KVELFPNGQSVGEK pc3**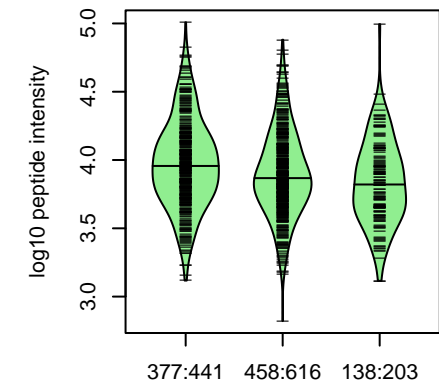

10:81318820:G:A\_G  
 $p = 2.2e-05$ ,  $\beta = -0.197$ ,  $N = 973$

**P35247 NP5**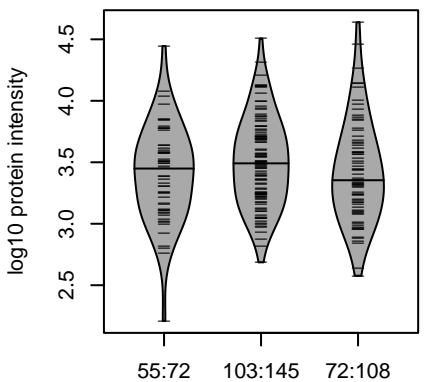

rs17880349  
 $p = 0.37$ ,  $\beta = -0.0793$ ,  $N = 230$

**SAAENAALQQLVVAK pc2**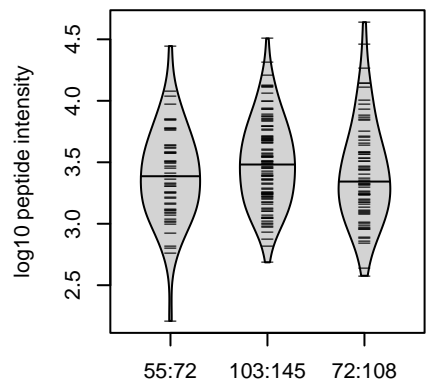

rs17880349  
 $p = 0.39$ ,  $\beta = -0.0753$ ,  $N = 230$

**NEAAFLSMTDSK pc2**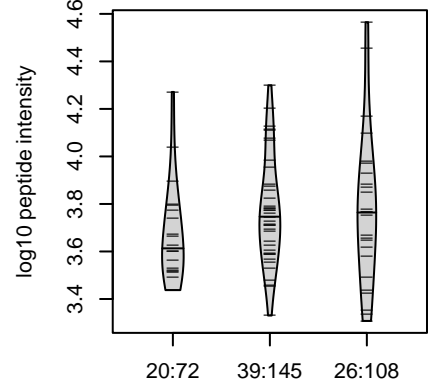

rs17880349  
 $p = 0.5$ ,  $\beta = 0.0965$ ,  $N = 85$

**PFTEAQLLCTQAGGQLATPR pc3  
rs3088308 ALT**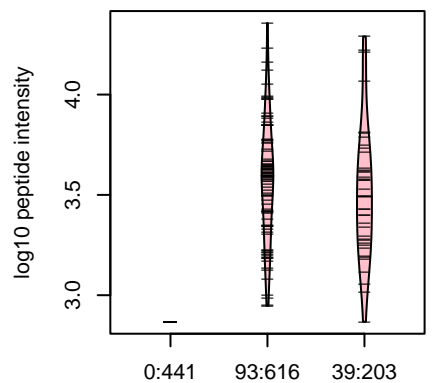

10:81318820:G:A\_G  
 $p = 4.7e-27$ ,  $\text{model} = \text{REC}$ ,  $N = 132$

**PFTEAQLLCTQAGGQLASPR pc3  
rs3088308 REF**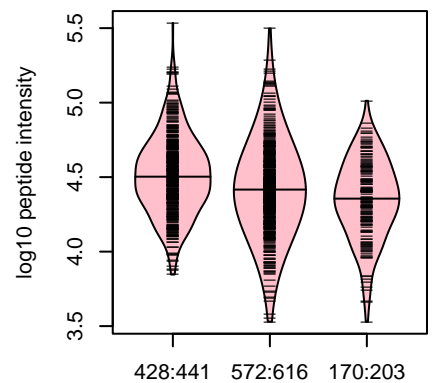

10:81318820:G:A\_G  
 $p = 7.1e-07$ ,  $\text{model} = \text{DOM}$ ,  $N = 1170$

Locus: 171 (Sort: 197)

Status: Not replicated

80% power: No

SNP: 10:81318820:G:A

rsID: rs17880349

UniProtID: P35247

HGNC gene: SFTPD

Type: Cis-pQTL

**CNDP2 [cis]**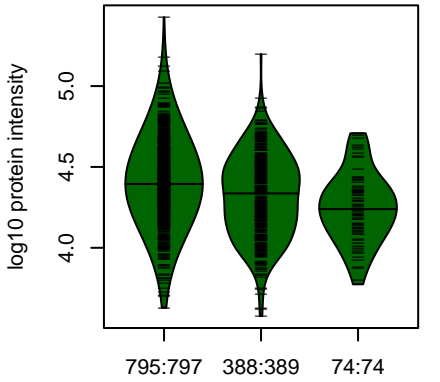

18:72176083:T:C\_C  
 $p = 4.7e-13$ ,  $\beta = -0.334$ ,  $N = 1257$

**TVFGVEPDLTR pc2**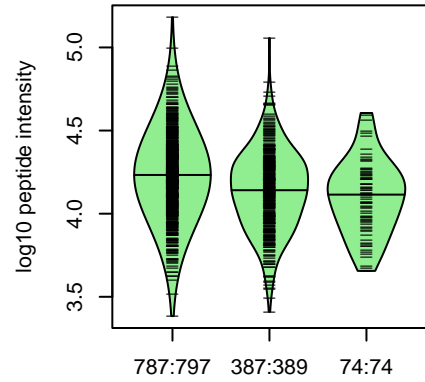

18:72176083:T:C\_C  
 $p = 4e-12$ ,  $\beta = -0.321$ ,  $N = 1248$

**GNILPGINEAVAAVTEEEHK pc3**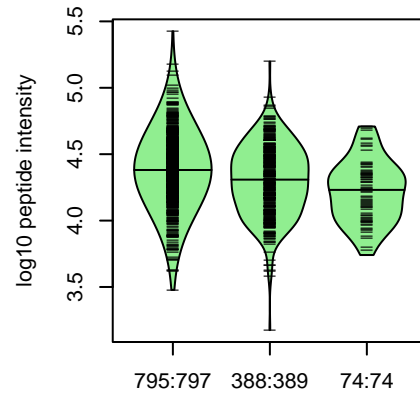

18:72176083:T:C\_C  
 $p = 3.3e-11$ ,  $\beta = -0.307$ ,  $N = 1257$

**WVAIQSVSAWPEK pc2**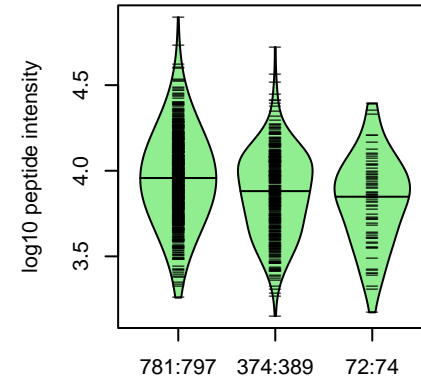

18:72176083:T:C\_C  
 $p = 3.7e-11$ ,  $\beta = -0.31$ ,  $N = 1227$

**LYDDIDFDIEEFAK pc2**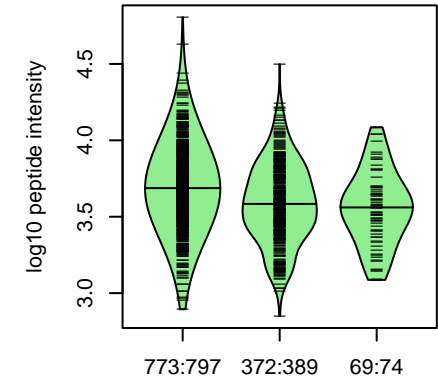

18:72176083:T:C\_C  
 $p = 7.3e-11$ ,  $\beta = -0.309$ ,  $N = 1214$

**Q96KP4 NP5**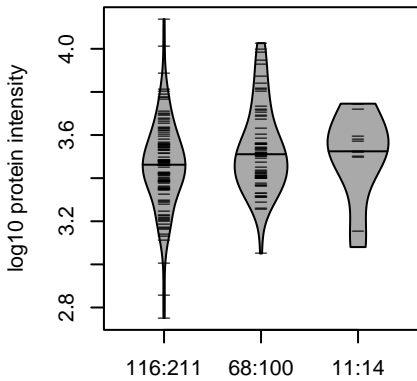

rs2278161  
 $p = 0.053$ ,  $\beta = 0.225$ ,  $N = 195$

**EGGSIPVTLTFQEATGK pc2**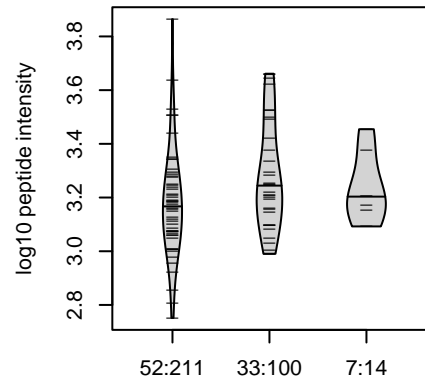

rs2278161  
 $p = 0.091$ ,  $\beta = 0.268$ ,  $N = 92$

**QLGGSVELVDIGK pc2**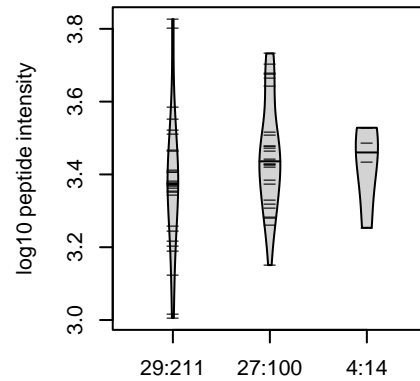

rs2278161  
 $p = 0.14$ ,  $\beta = 0.298$ ,  $N = 60$

**TVFGVEPDLTR pc2**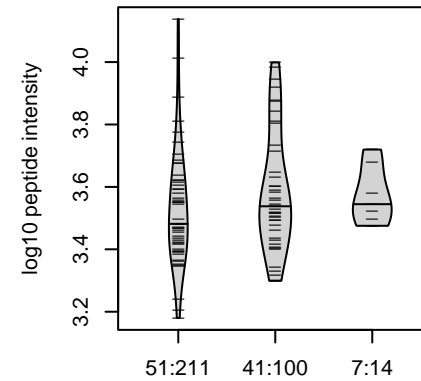

rs2278161  
 $p = 0.15$ ,  $\beta = 0.226$ ,  $N = 99$

**WVAIQSVSAWPEK pc2**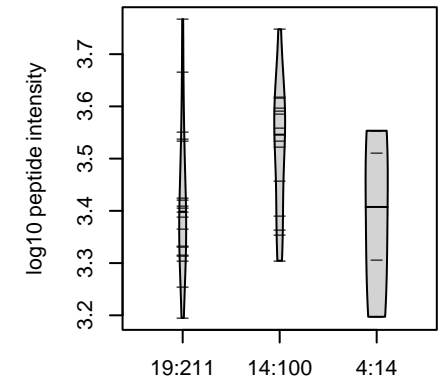

rs2278161  
 $p = 0.24$ ,  $\beta = 0.267$ ,  $N = 37$

Locus: 172 (Sort: 198)

Status: Not replicated

80% power: No

SNP: 18:72176083:T:C

rsID: rs2278161

UniProtID: Q96KP4

HGNC gene: CNDP2

Type: Cis-pQTL

**IGKV2D-29 [cis]**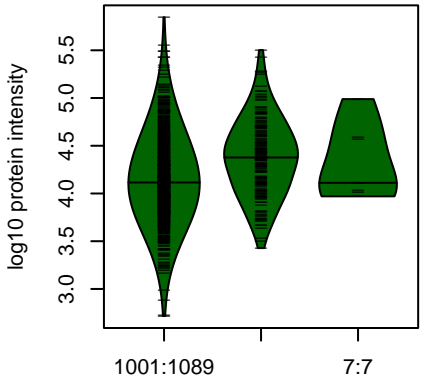

2:95365118:G:C\_C  
 $p = 5.1e-13$ ,  $\beta = 0.564$ ,  $N = 1164$

**TYLYWYLQK pc2**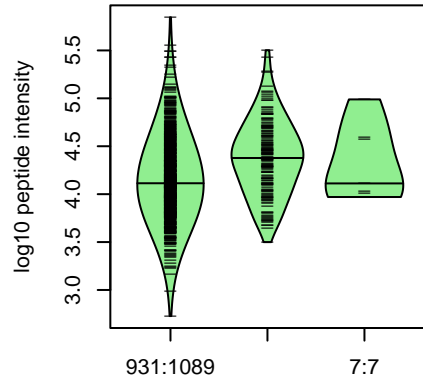

2:95365118:G:C\_C  
 $p = 9.2e-13$ ,  $\beta = 0.565$ ,  $N = 1090$

**SSQSLHSDGK pc2**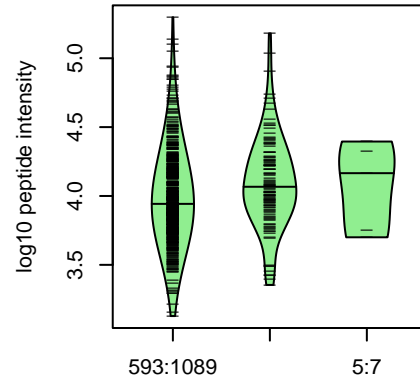

2:95365118:G:C\_C  
 $p = 6.4e-05$ ,  $\beta = 0.375$ ,  $N = 710$

**FSGSGSGTDFTLK pc2**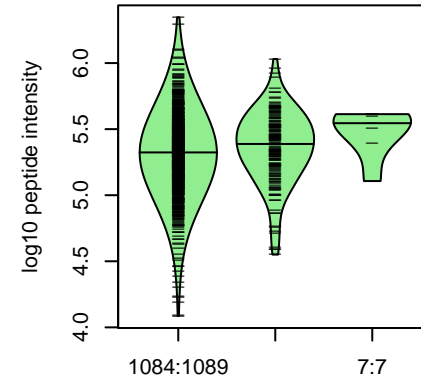

2:95365118:G:C\_C  
 $p = 0.0019$ ,  $\beta = 0.239$ ,  $N = 1255$

**PGQPQLLIYEVSNR pc3**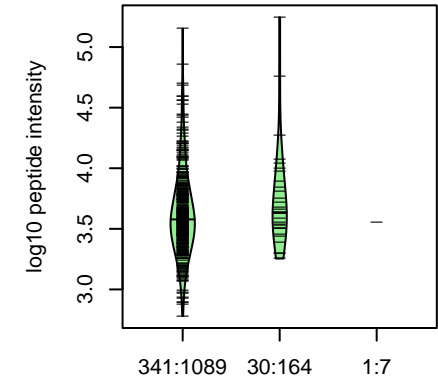

2:95365118:G:C\_C  
 $p = 0.047$ ,  $\beta = 0.35$ ,  $N = 372$

**A0A075B6S2 NP3**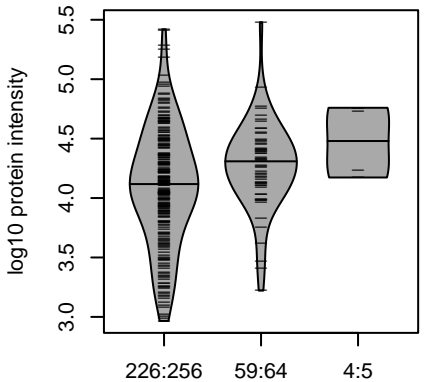

rs62148537  
 $p = 0.00069$ ,  $\beta = 0.435$ ,  $N = 289$

**TYLYWYLQK pc2**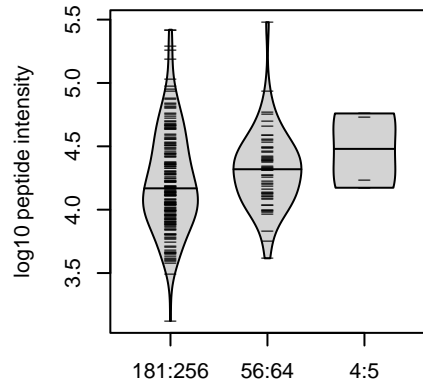

rs62148537  
 $p = 0.0063$ ,  $\beta = 0.36$ ,  $N = 241$

**SSQSLHSDGK pc2**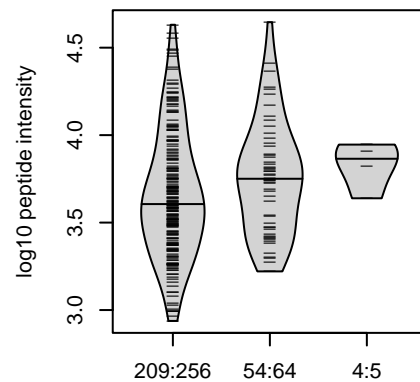

rs62148537  
 $p = 0.042$ ,  $\beta = 0.267$ ,  $N = 267$

**FSGSGSGTDFTLK pc2**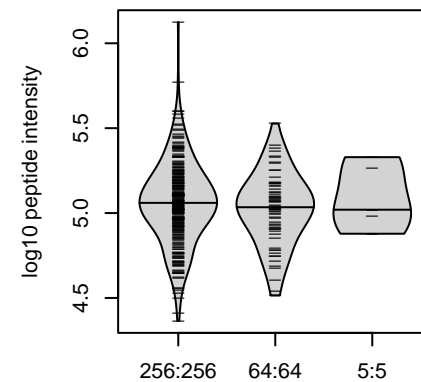

rs62148537  
 $p = 0.6$ ,  $\beta = -0.0639$ ,  $N = 325$

Locus: 173 (Sort: 199)  
 Status: Not replicated  
 80% power: No  
 SNP: 2:95365118:G:C  
 rsID: rs62148537  
 UniProtID: A0A075B6S2  
 HGNC gene: IGKV2D-29  
 Type: Cis-pQTL

**AEBP1 [cis]**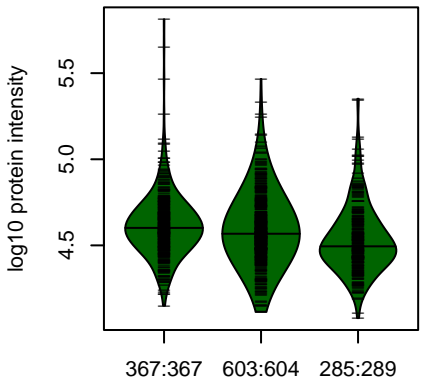

7:44157978:A:G\_G  
 $p = 5.1e-13$ ,  $\beta = -0.28$ ,  $N = 1255$

**IEDNQIR pc2**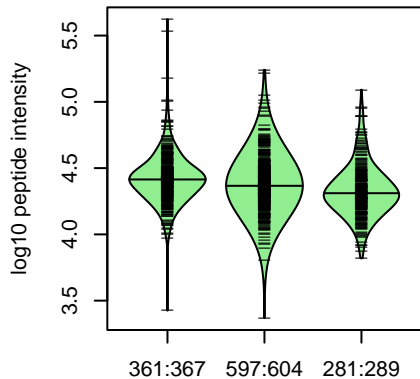

7:44157978:A:G\_G  
 $p = 5.7e-15$ ,  $\beta = -0.304$ ,  $N = 1239$

**VVNEECPTITR pc2**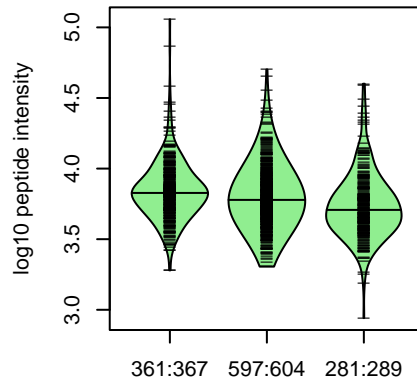

7:44157978:A:G\_G  
 $p = 8.3e-14$ ,  $\beta = -0.291$ ,  $N = 1239$

**SLVQDTR pc2**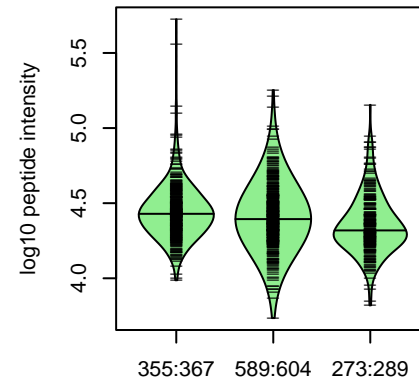

7:44157978:A:G\_G  
 $p = 3.5e-12$ ,  $\beta = -0.275$ ,  $N = 1217$

**TQWIEVDTR pc2**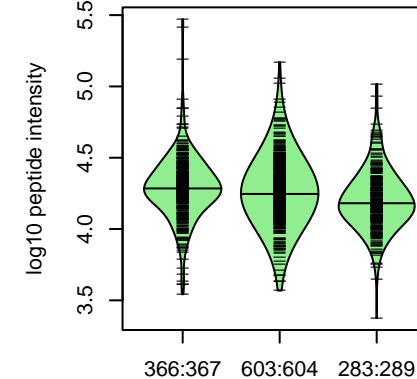

7:44157978:A:G\_G  
 $p = 2.5e-11$ ,  $\beta = -0.26$ ,  $N = 1252$

**Q8IUX7 NP2**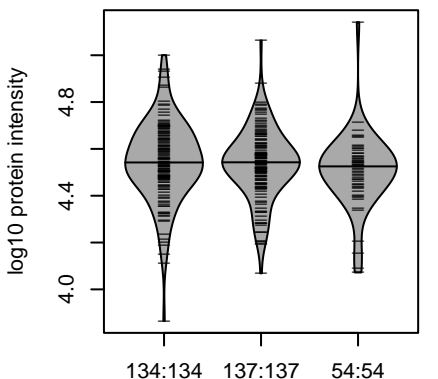

rs3217962  
 $p = 0.0085$ ,  $\beta = -0.198$ ,  $N = 325$

**VVNEECPTITR pc2**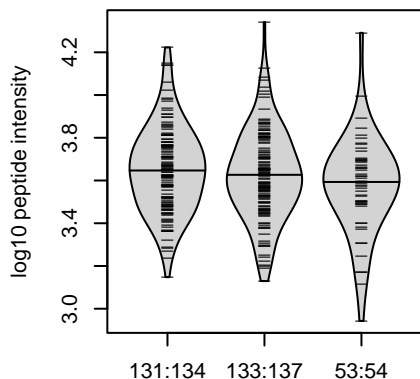

rs3217962  
 $p = 0.0043$ ,  $\beta = -0.218$ ,  $N = 317$

**ILNPGEYR pc2**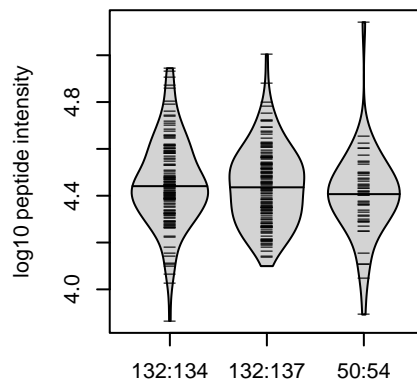

rs3217962  
 $p = 0.011$ ,  $\beta = -0.197$ ,  $N = 314$

**FTGVITQGR pc2**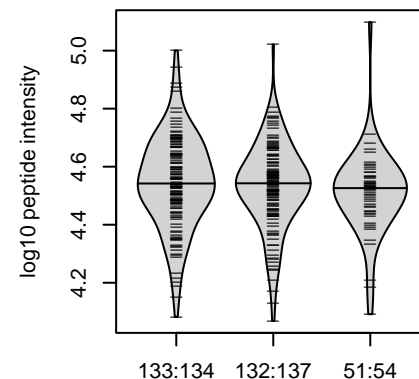

rs3217962  
 $p = 0.014$ ,  $\beta = -0.19$ ,  $N = 316$

**FPHESELPREWENNK pc4**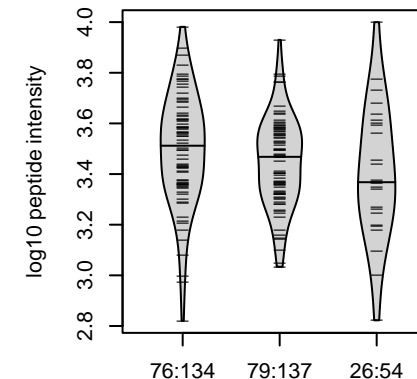

rs3217962  
 $p = 0.025$ ,  $\beta = -0.234$ ,  $N = 181$

**VWPEPPEEK pc2  
rs2537188 REF**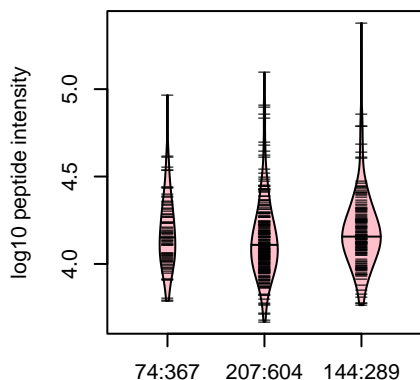

7:44157978:A:G\_G  
 $p = 2.6e-11$ ,  $\text{model} = \text{REC}$ ,  $N = 425$

Locus: 174 (Sort: 200)  
 Status: Not replicated  
 80% power: No  
 SNP: 7:44157978:A:G  
 rsID: rs3217962  
 UniProtID: Q8IUX7  
 HGNC gene: AEBP1  
 Type: Cis-pQTL

**FCN1 [cis]**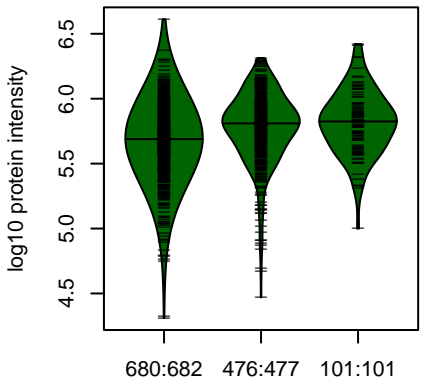

9:137843955:T:C\_C  
 $p = 6.4e-13$ ,  $\beta = 0.313$ ,  $N = 1257$

**GDAGQSQSCATGPR pc2**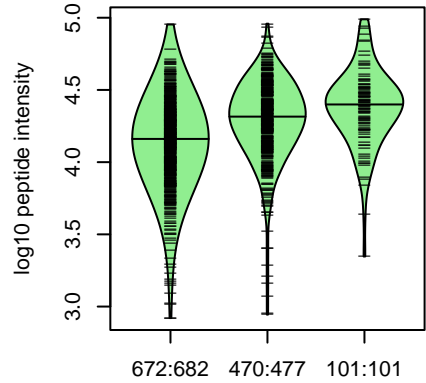

9:137843955:T:C\_C  
 $p = 1e-25$ ,  $\beta = 0.452$ ,  $N = 1243$

**GEAGVIGER pc2**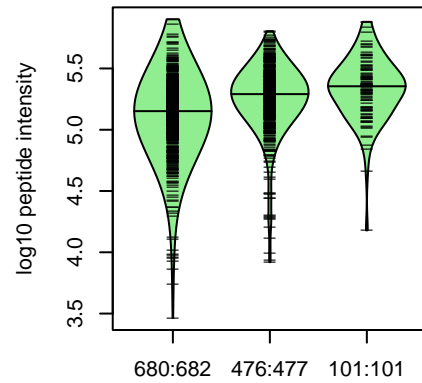

9:137843955:T:C\_C  
 $p = 1.4e-21$ ,  $\beta = 0.412$ ,  $N = 1257$

**VVGLEGS DK pc2**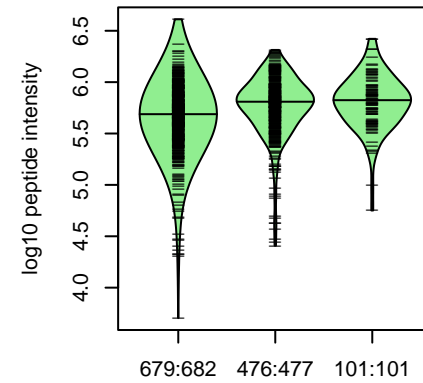

9:137843955:T:C\_C  
 $p = 1.2e-12$ ,  $\beta = 0.309$ ,  $N = 1256$

**VDLVDFEGNHQFAK pc3**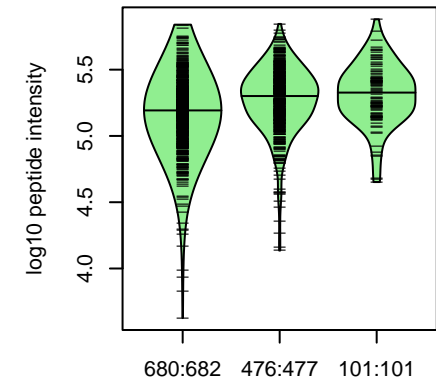

9:137843955:T:C\_C  
 $p = 2.7e-12$ ,  $\beta = 0.304$ ,  $N = 1257$

**O00602 NP5**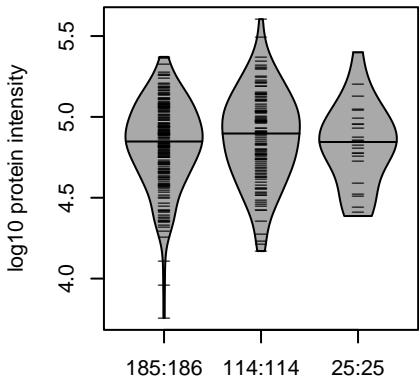

rs60008355  
 $p = 0.46$ ,  $\beta = 0.0634$ ,  $N = 324$

**GDAGQSQSCATGPR pc2**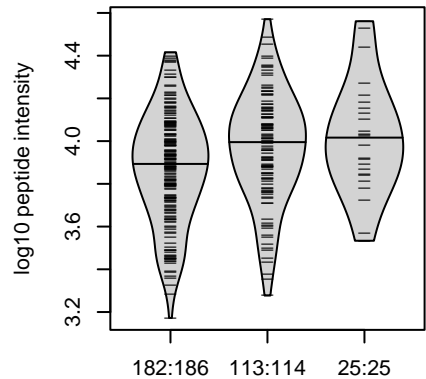

rs60008355  
 $p = 0.00013$ ,  $\beta = 0.328$ ,  $N = 320$

**RMDGSVDFYR pc2**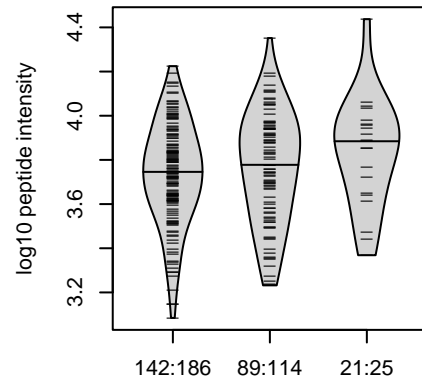

rs60008355  
 $p = 0.068$ ,  $\beta = 0.175$ ,  $N = 252$

**GEAGVIGER pc2**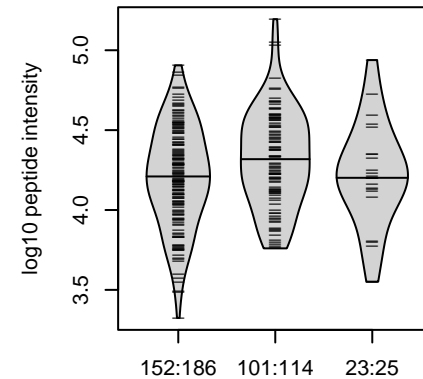

rs60008355  
 $p = 0.11$ ,  $\beta = 0.147$ ,  $N = 276$

**VDLVDFEGNHQFAK pc2**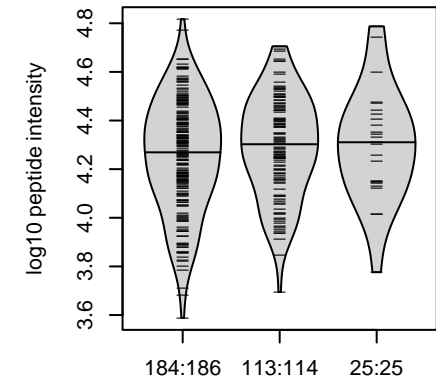

rs60008355  
 $p = 0.11$ ,  $\beta = 0.137$ ,  $N = 322$

Locus: 175 (Sort: 201)  
 Status: Not replicated  
 80% power: No  
 SNP: 9:137843955:T:C  
 rsID: rs60008355  
 UniProtID: O00602  
 HGNC gene: FCN1  
 Type: Cis-pQTL



**HEG1 [cis]**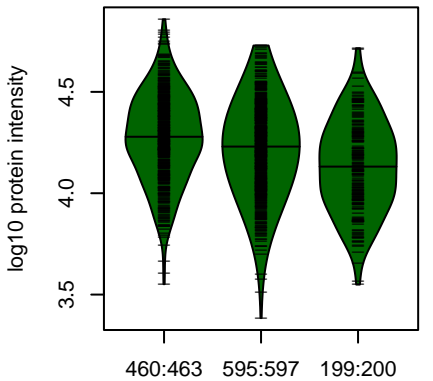

3:124763928:A:C\_C  
 $p = 1e-12$ ,  $\beta = -0.286$ ,  $N = 1254$

**EGVMVQTSGK pc2**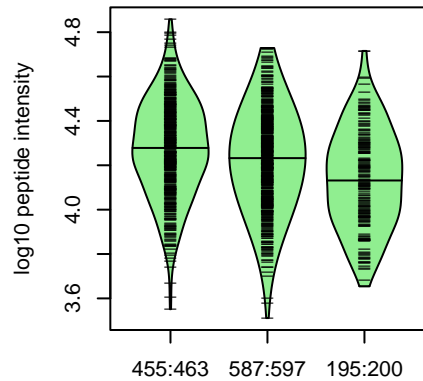

3:124763928:A:C\_C  
 $p = 3.3e-12$ ,  $\beta = -0.281$ ,  $N = 1237$

**ALSLAPLAGAGLELQLER pc2**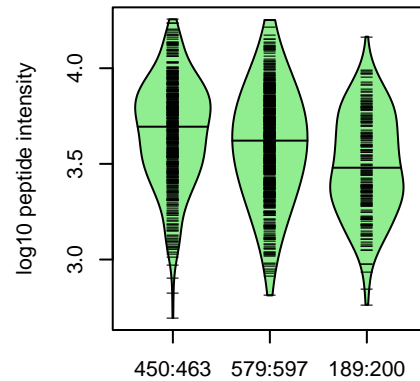

3:124763928:A:C\_C  
 $p = 4.5e-12$ ,  $\beta = -0.283$ ,  $N = 1218$

**SGTASEMGTER pc2**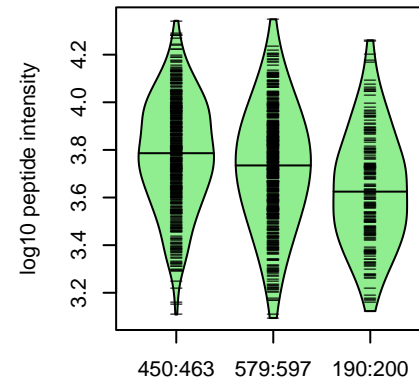

3:124763928:A:C\_C  
 $p = 8.2e-12$ ,  $\beta = -0.279$ ,  $N = 1219$

**TMHVATVFTDGGPR pc3**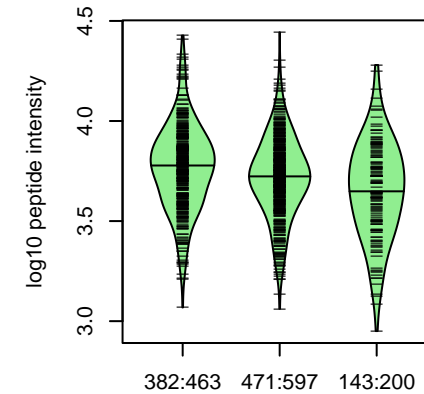

3:124763928:A:C\_C  
 $p = 1.7e-07$ ,  $\beta = -0.239$ ,  $N = 996$

**Q9ULI3 NP2**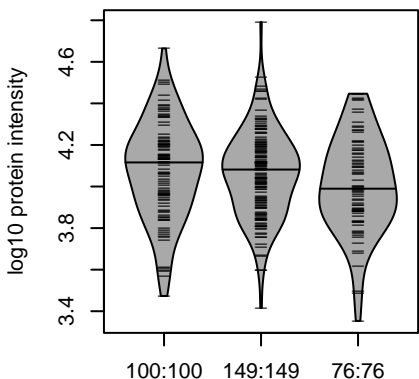

rs60601708  
 $p = 0.029$ ,  $\beta = -0.163$ ,  $N = 325$

**ALSLAPLAGAGLELQLER pc2**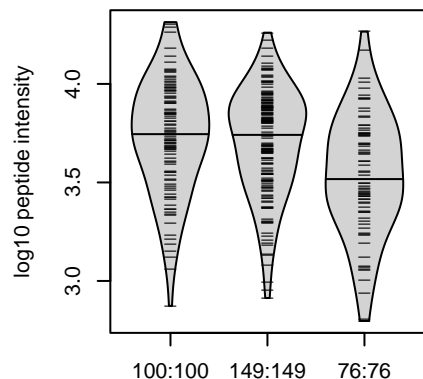

rs60601708  
 $p = 2.1e-05$ ,  $\beta = -0.314$ ,  $N = 325$

**SGTASEMGTER pc2**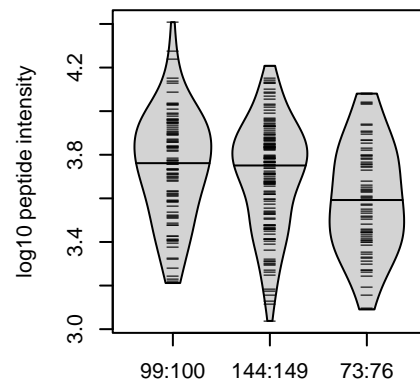

rs60601708  
 $p = 0.00017$ ,  $\beta = -0.282$ ,  $N = 316$

**EGVMVQTSGK pc2**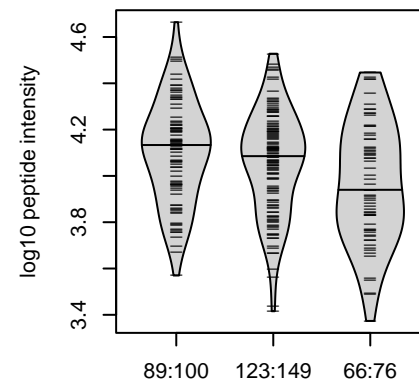

rs60601708  
 $p = 0.00063$ ,  $\beta = -0.27$ ,  $N = 278$

**SLTVSLGPVSK pc2**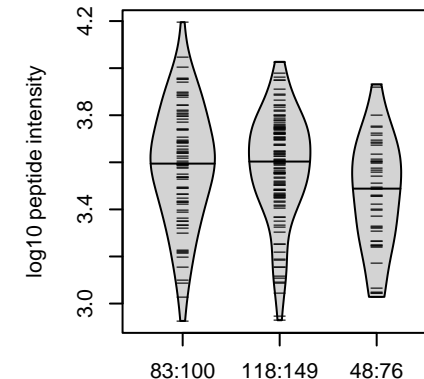

rs60601708  
 $p = 0.0034$ ,  $\beta = -0.255$ ,  $N = 249$

Locus: 176 (Sort: 202)

Status: Not replicated

80% power: No

SNP: 3:124763928:A:C

rsID: rs60601708

UniProtID: Q9ULI3

HGNC gene: HEG1

Type: Cis-pQTL

**LIPC [cis]**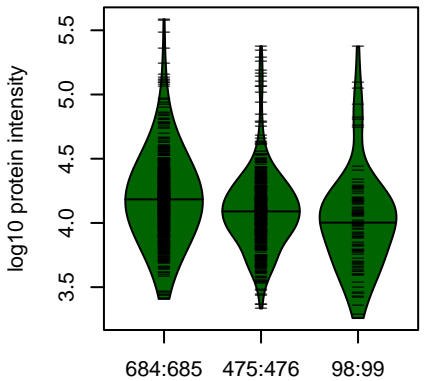

15:58723426:A:G\_G  
 $p = 1.1e-12$ ,  $\beta = -0.311$ ,  $N = 1257$

**MTFCSENTDDLLLRPTQEK pc3 SQPAQPVNVGLVDWITLAHDHYTI AVR**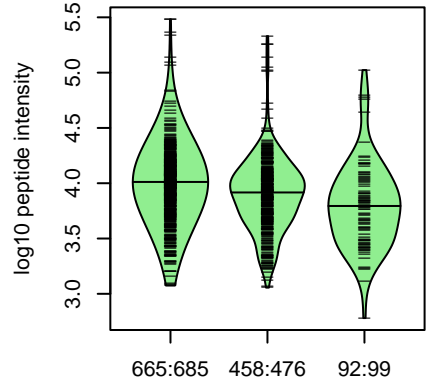

15:58723426:A:G\_G  
 $p = 4.6e-11$ ,  $\beta = -0.295$ ,  $N = 1215$

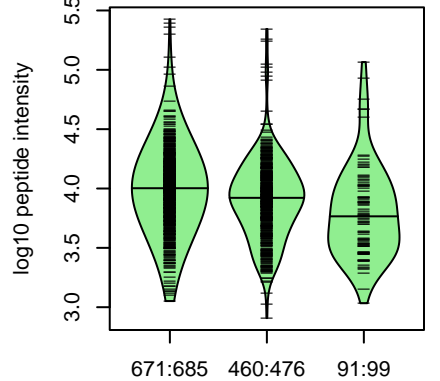

15:58723426:A:G\_G  
 $p = 1.8e-09$ ,  $\beta = -0.27$ ,  $N = 1222$

**WLEESVQLSR pc2**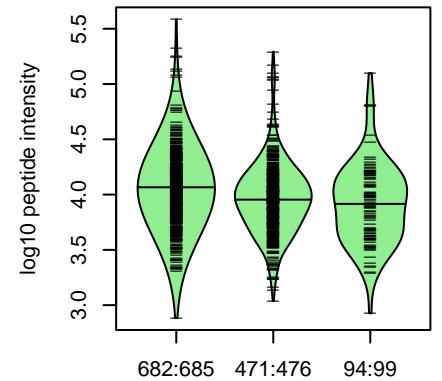

15:58723426:A:G\_G  
 $p = 2.8e-09$ ,  $\beta = -0.263$ ,  $N = 1247$

**FLLFGETNQGQCIR pc2**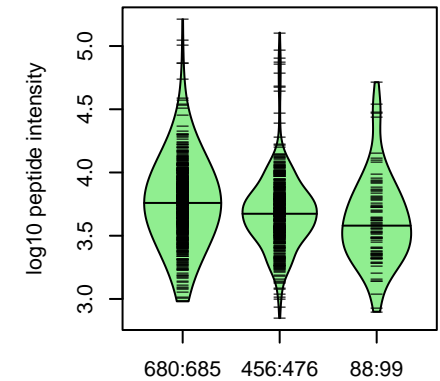

15:58723426:A:G\_G  
 $p = 8.7e-09$ ,  $\beta = -0.259$ ,  $N = 1224$

**P11150 NP4**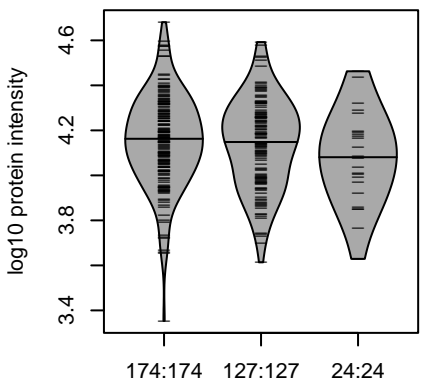

rs1077835  
 $p = 0.021$ ,  $\beta = -0.203$ ,  $N = 325$

**MTFCSENTDDLLLRPTQEK pc3 SQPAQPVNVGLVDWITLAHDHYTI AVR**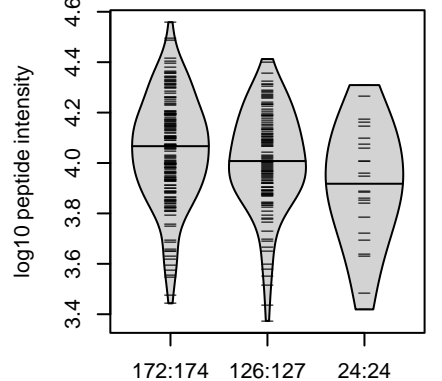

rs1077835  
 $p = 0.00012$ ,  $\beta = -0.333$ ,  $N = 322$

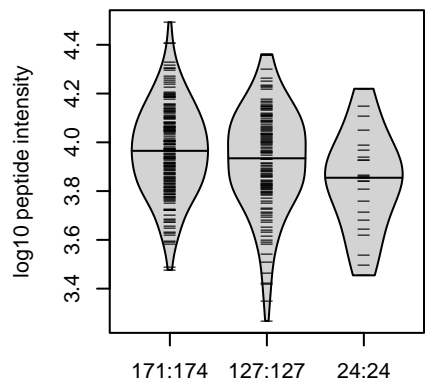

rs1077835  
 $p = 0.00017$ ,  $\beta = -0.325$ ,  $N = 322$

**FLLFGETNQGQCIR pc2**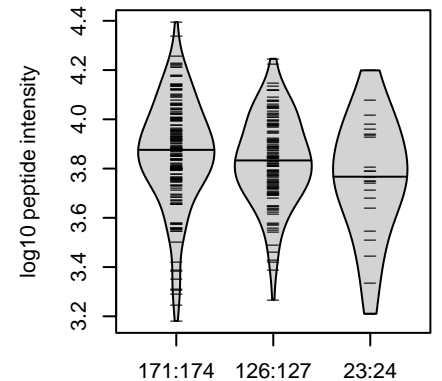

rs1077835  
 $p = 0.0017$ ,  $\beta = -0.275$ ,  $N = 320$

**SHVHLIGYSLGAHVSGFAGSSIGGTHK**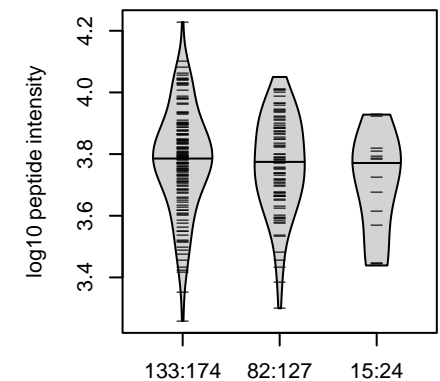

rs1077835  
 $p = 0.036$ ,  $\beta = -0.219$ ,  $N = 230$

**LSPDDANFVDIAHTFTR pc3 rs6083 REF**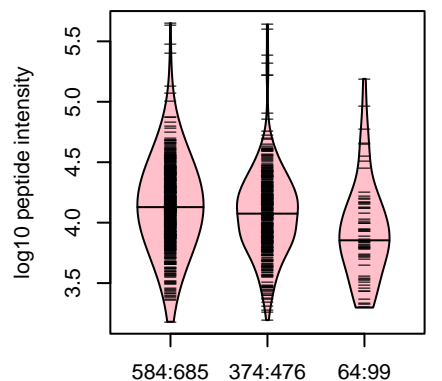

15:58723426:A:G\_G  
 $p = 4.7e-05$ ,  $\text{model} = \text{DOM}$ ,  $N = 1022$

**LSPDASFVDIAHTFTR pc3 rs6083 ALT**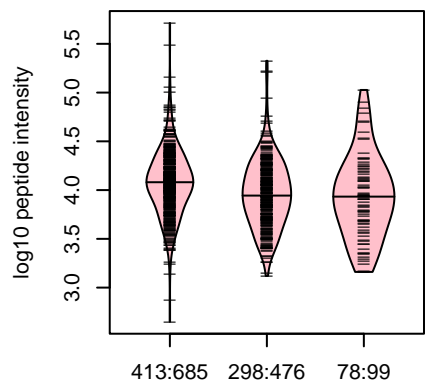

15:58723426:A:G\_G  
 $p = 0.00048$ ,  $\text{model} = \text{DOM}$ ,  $N = 789$

Locus: 177 (Sort: 203)  
 Status: Not replicated  
 80% power: No  
 SNP: 15:58723426:A:G  
 rsID: rs1077835  
 UniProtID: P11150  
 HGNC gene: LIPC  
 Type: Cis-pQTL

**CHI3L1 [cis]**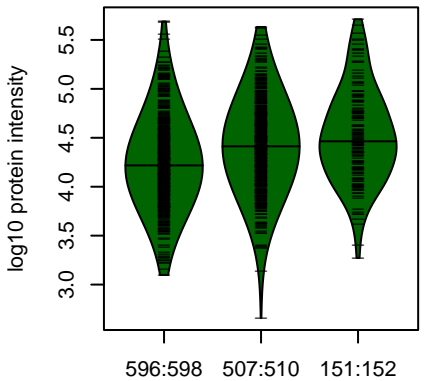

1:203120143:G:T\_G  
 $p = 1.2e-12$ ,  $\beta = 0.289$ ,  $N = 1254$

**LVMGIPTFGR pc2**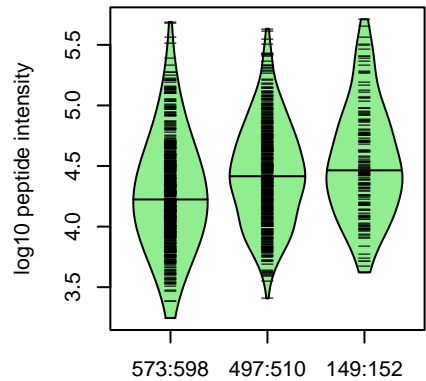

1:203120143:G:T\_G  
 $p = 1.2e-12$ ,  $\beta = 0.292$ ,  $N = 1219$

**QLLSAALSAGK pc2**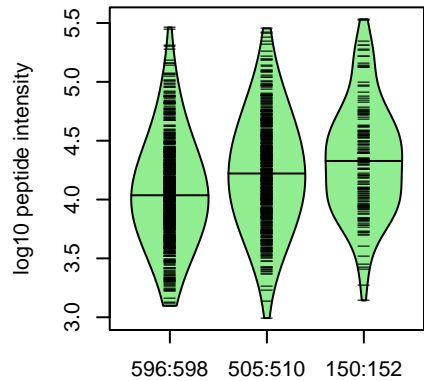

1:203120143:G:T\_G  
 $p = 5.9e-12$ ,  $\beta = 0.28$ ,  $N = 1251$

**TLLSVGGWNFGSQR pc2**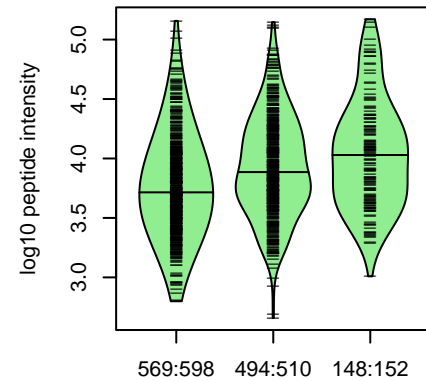

1:203120143:G:T\_G  
 $p = 9e-12$ ,  $\beta = 0.282$ ,  $N = 1211$

**GNQWVGYYDDQESVK pc2**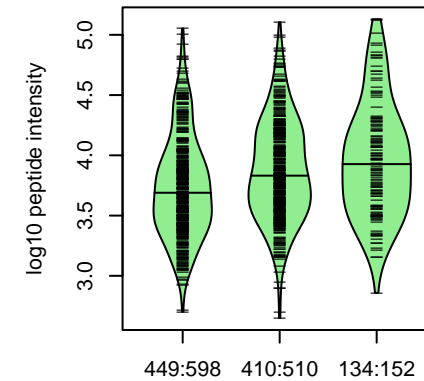

1:203120143:G:T\_G  
 $p = 3.4e-07$ ,  $\beta = 0.229$ ,  $N = 993$

**P36222 NP1**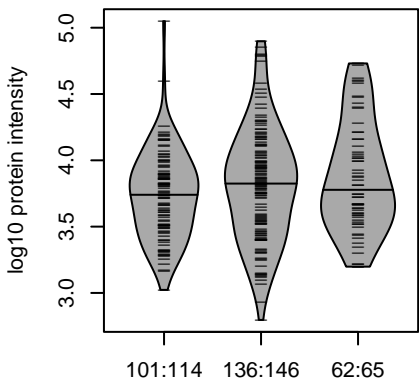

rs1845466  
 $p = 0.0095$ ,  $\beta = 0.201$ ,  $N = 299$

**TLLSVGGWNFGSQR pc2**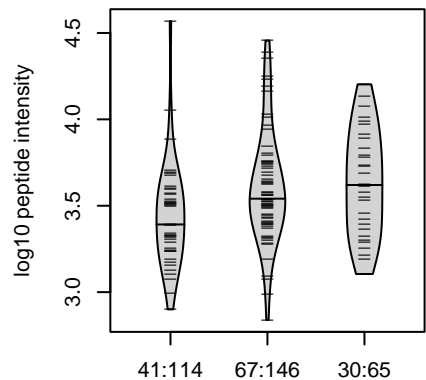

rs1845466  
 $p = 0.0014$ ,  $\beta = 0.366$ ,  $N = 138$

**LVMGIPTFGR pc2**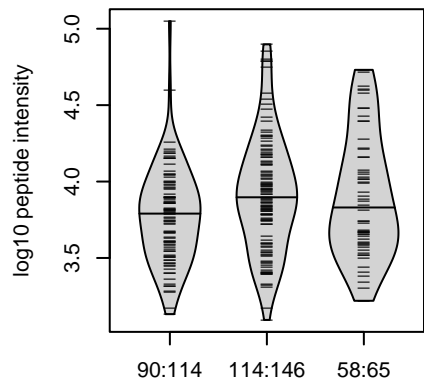

rs1845466  
 $p = 0.0055$ ,  $\beta = 0.226$ ,  $N = 262$

**QLLSAALSAGK pc2**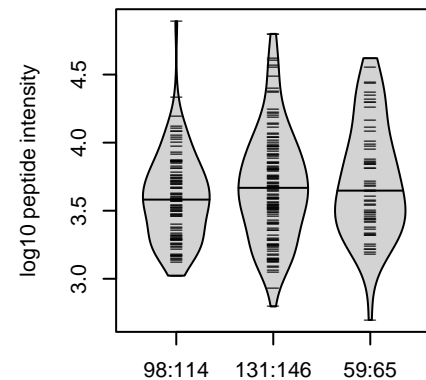

rs1845466  
 $p = 0.0063$ ,  $\beta = 0.218$ ,  $N = 288$

**ILGQQVPYATK pc2**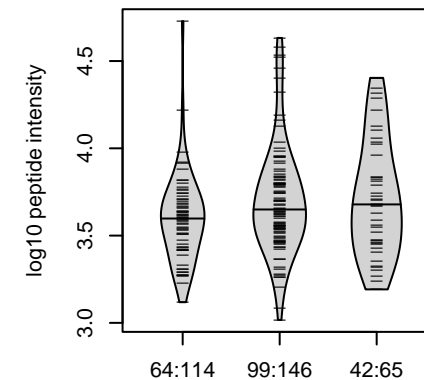

rs1845466  
 $p = 0.041$ ,  $\beta = 0.196$ ,  $N = 205$

**THGFDGLDLAWLYPGRR pc3  
rs880633 REF**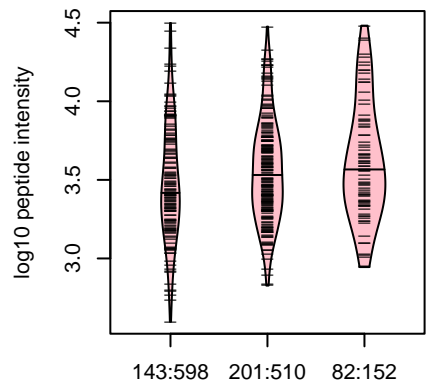

1:203120143:G:T\_G  
 $p = 1.6e-12$ , model = REC,  $N = 426$

**THGFDGLDLAWLYPGRGDK pc3  
rs880633 ALT**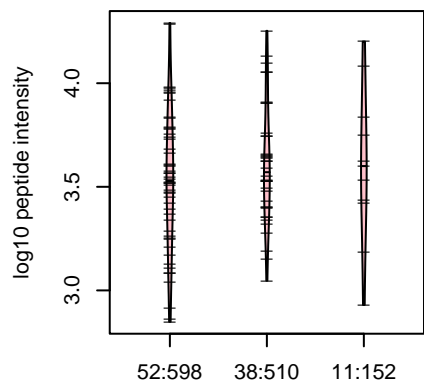

1:203120143:G:T\_G  
 $p = 0.41$ , model = REC,  $N = 101$

Locus: 178 (Sort: 204)  
 Status: Not replicated  
 80% power: No  
 SNP: 1:203120143:G:T  
 rsID: rs1845466  
 UniProtID: P36222  
 HGNC gene: CHI3L1  
 Type: Cis-pQTL

**NUCB2 [cis]**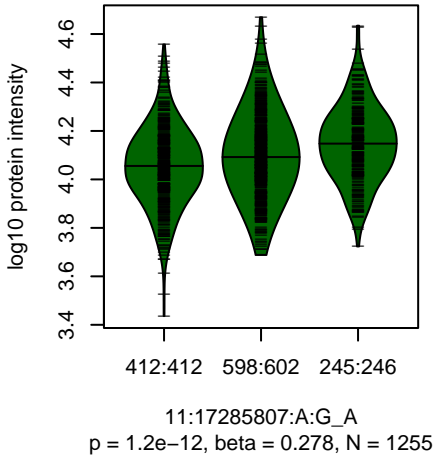**EYENIIALQENELK pc2**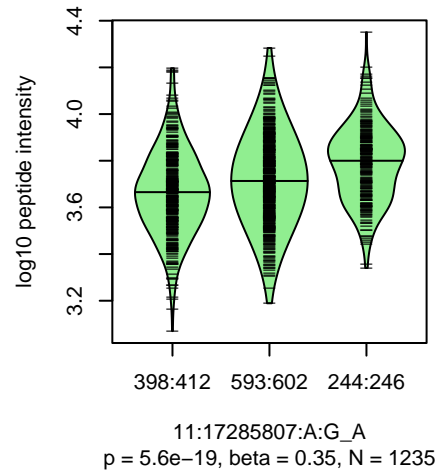**LEYHQVIQQMEQK pc3**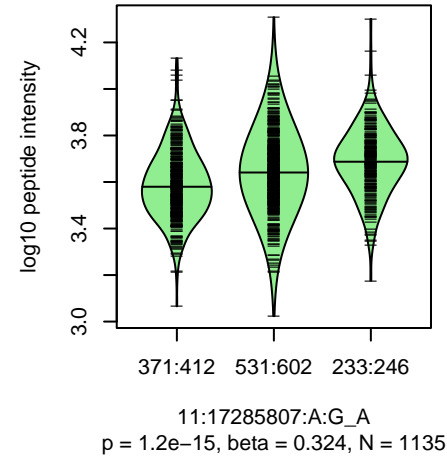**LVTLEEFK pc2**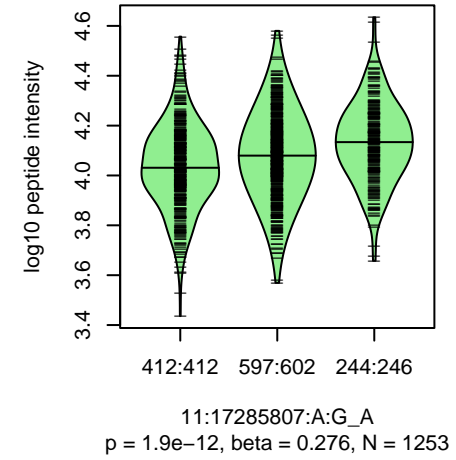**FESTDLMLIK pc2**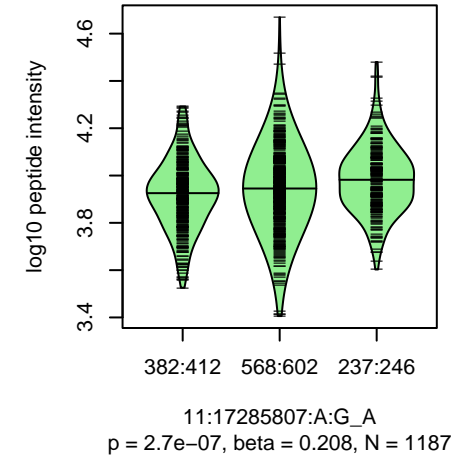**P80303 NP2**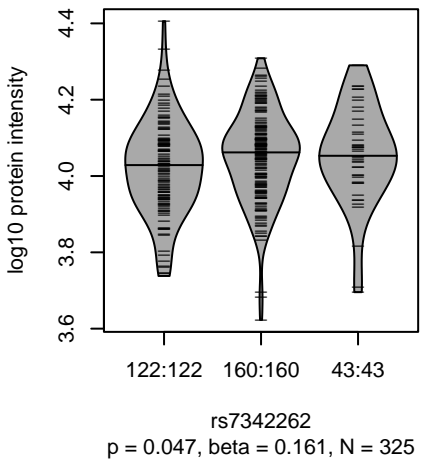**EYENIIALQENELK pc2**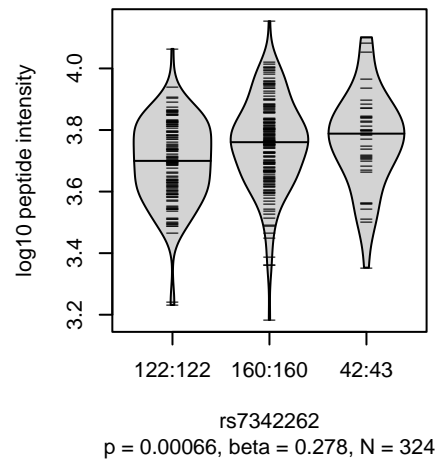**LEYHQVIQQMEQK pc3**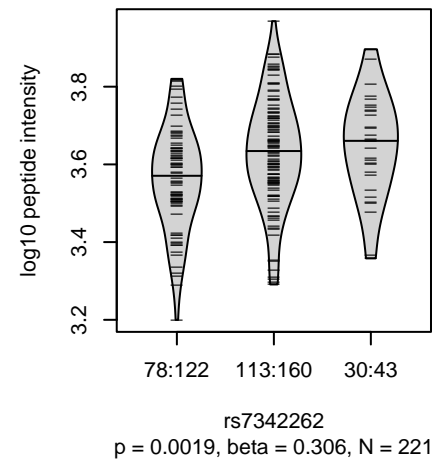**LVTLEEFK pc2**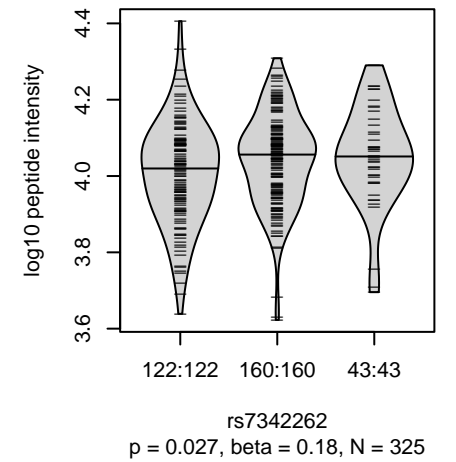**ELDLVSHHVR pc3**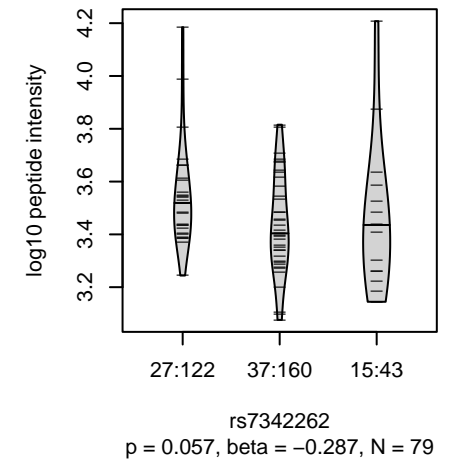

Locus: 179 (Sort: 205)  
 Status: Not replicated  
 80% power: No  
 SNP: 11:17285807:A:G  
 rsID: rs7342262  
 UniProtID: P80303  
 HGNC gene: NUCB2  
 Type: Cis-pQTL

**ITIH4 [trans]**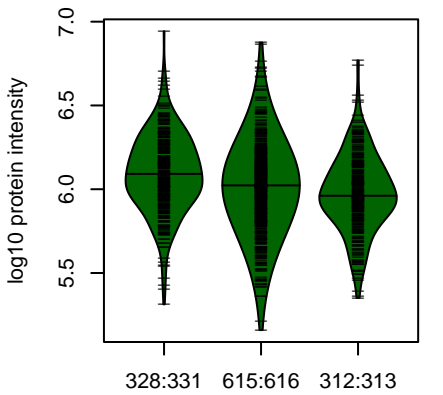

4:187139939:A:G\_A  
 $p = 1.2e-12$ ,  $\beta = -0.277$ ,  $N = 1255$

**NVHSGSTFFK pc2**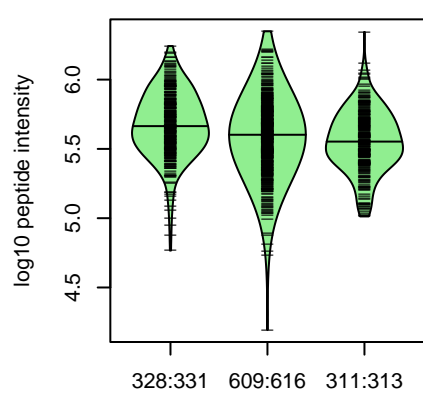

4:187139939:A:G\_A  
 $p = 2.6e-13$ ,  $\beta = -0.285$ ,  $N = 1248$

**YYLQGAK pc2**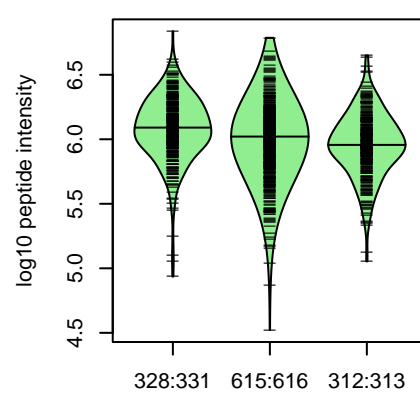

4:187139939:A:G\_A  
 $p = 9.8e-13$ ,  $\beta = -0.278$ ,  $N = 1255$

**PEASFSPR pc2**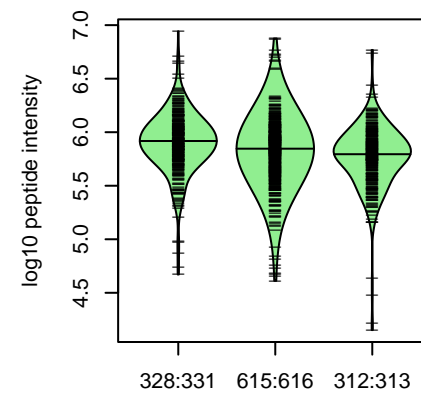

4:187139939:A:G\_A  
 $p = 1.9e-12$ ,  $\beta = -0.275$ ,  $N = 1255$

**IPKPEASFSPR pc3**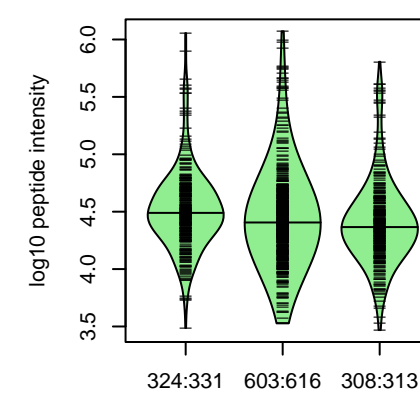

4:187139939:A:G\_A  
 $p = 1.6e-06$ ,  $\beta = -0.189$ ,  $N = 1235$

**Q14624 NP3**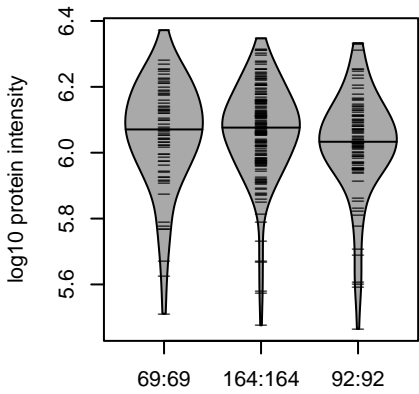

rs12331618  
 $p = 0.2$ ,  $\beta = -0.102$ ,  $N = 325$

**VTIGLLFDWGR pc2**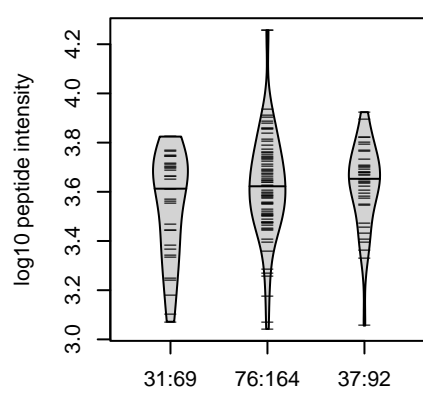

rs12331618  
 $p = 0.1$ ,  $\beta = 0.193$ ,  $N = 144$

**NVVFVIDK pc2**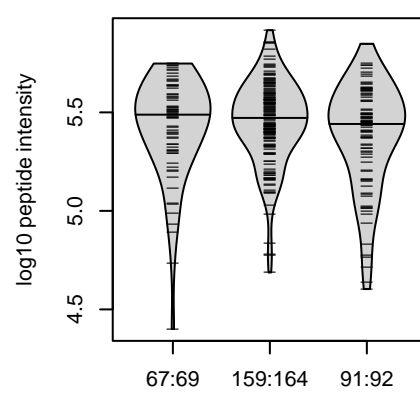

rs12331618  
 $p = 0.11$ ,  $\beta = -0.128$ ,  $N = 317$

**WKETLFSVMPGLK pc2**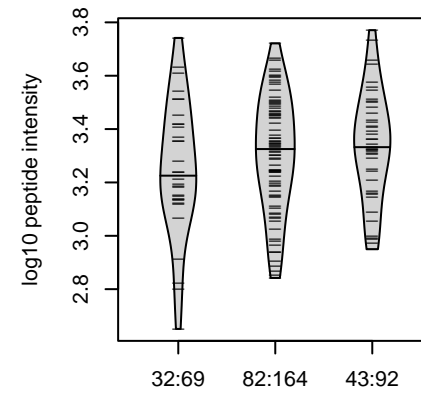

rs12331618  
 $p = 0.11$ ,  $\beta = 0.182$ ,  $N = 157$

**LQDRGPDVLTATVSGK pc2**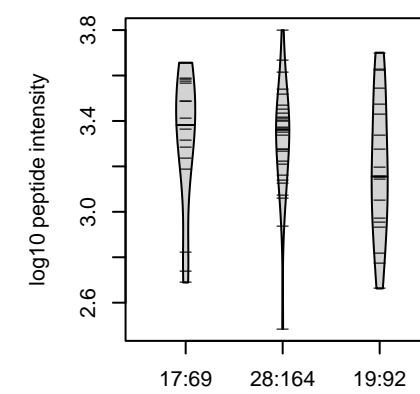

rs12331618  
 $p = 0.11$ ,  $\beta = -0.252$ ,  $N = 64$

**LLGLPAPPDVPDHAAYHPFR pc4  
rs2276814 ALT**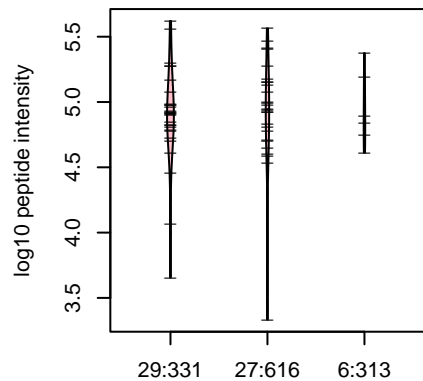

4:187139939:A:G\_A  
 $p = 0.00052$ ,  $\text{model} = \text{REC}$ ,  $N = 62$

**LLGLPAPPDVPDHAAYHPFR pc4  
rs2276814 ALT**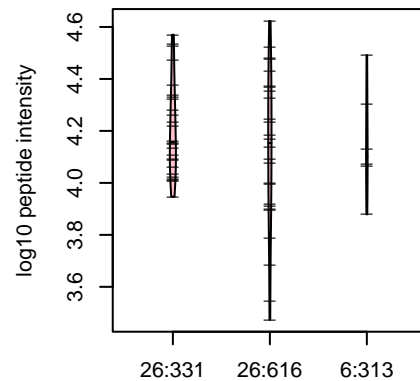

4:187139939:A:G\_A  
 $p = 0.0019$ ,  $\text{model} = \text{REC}$ ,  $N = 58$

**QLGLPAPPDVPDHAAYHPFR pc4  
rs2276814 REF**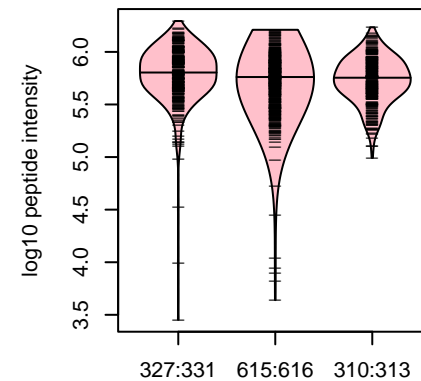

4:187139939:A:G\_A  
 $p = 0.22$ ,  $\text{model} = \text{REC}$ ,  $N = 1252$

**AFITNFSMIIDGMTYPGIK pc3  
rs13072536 REF**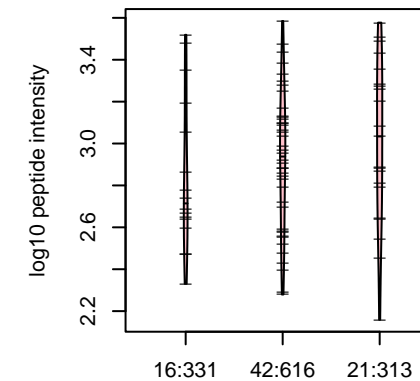

4:187139939:A:G\_A  
 $p = 0.24$ ,  $\text{model} = \text{REC}$ ,  $N = 79$

Locus: 180 (Sort: 206)  
 Status: Not replicated  
 80% power: No  
 SNP: 4:187139939:A:G  
 rsID: rs12331618  
 UniProtID: Q14624  
 HGNC gene: ITIH4  
 Type: Trans-pQTL

**ITIH4 [trans]**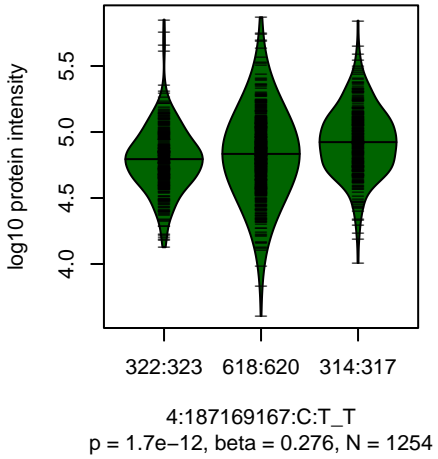**NVHSGSTFFK pc2**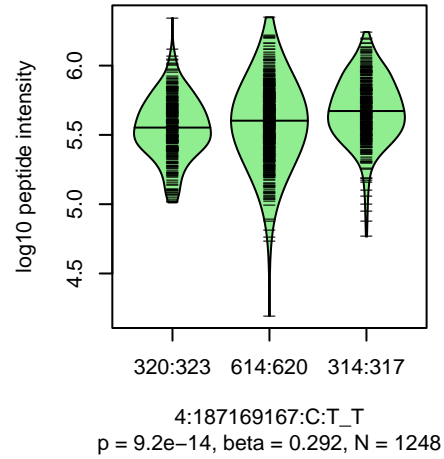**PGLDHTASFSPR pc3**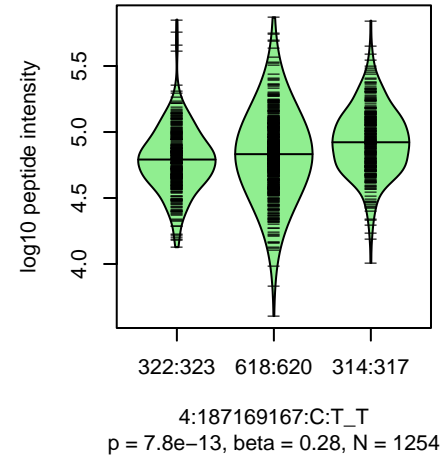**YYLQGAK pc2**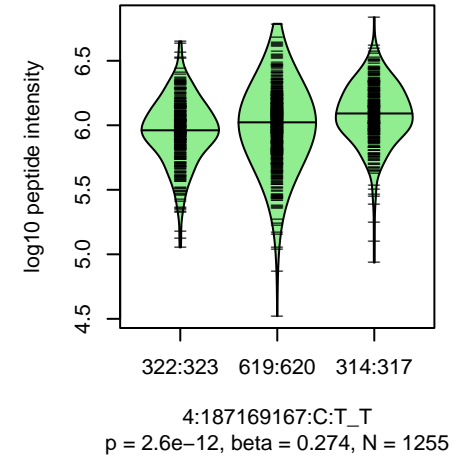**ANTVQEATFQMELPK pc2**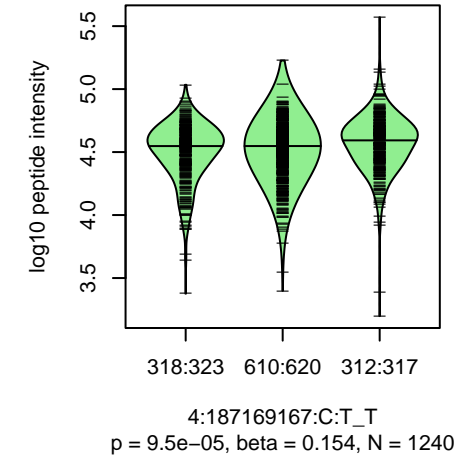**B7ZKJ8 NP3**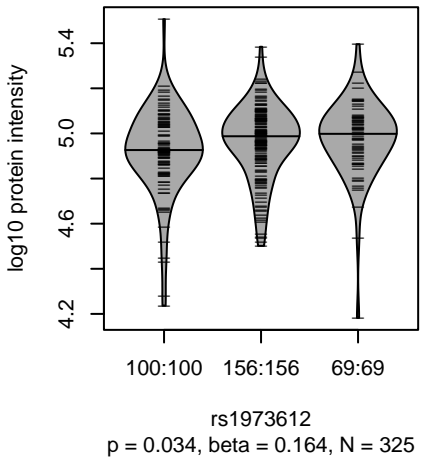**PGLDHTASFSPR pc3**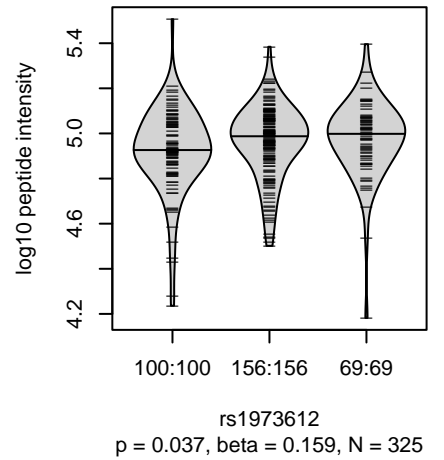**NVVFVIDK pc2**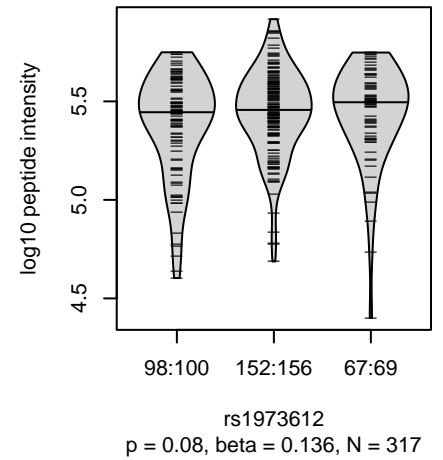**VTIGLLFWDGR pc2**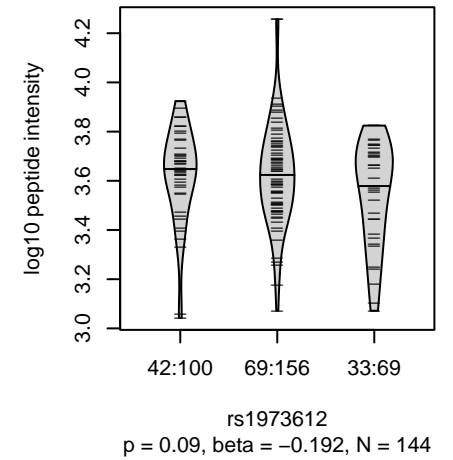**YYLQGAK pc2**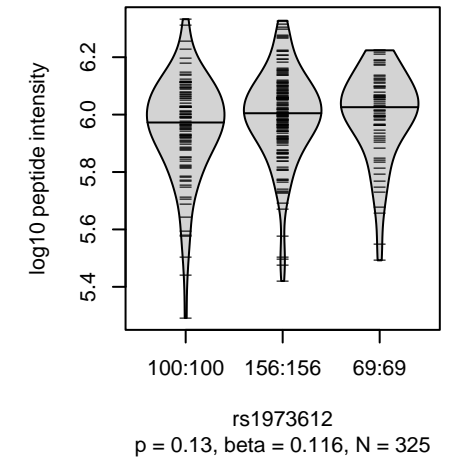**LLGLPAPPDVPDHAAYHPFR pc3  
rs2276814 ALT**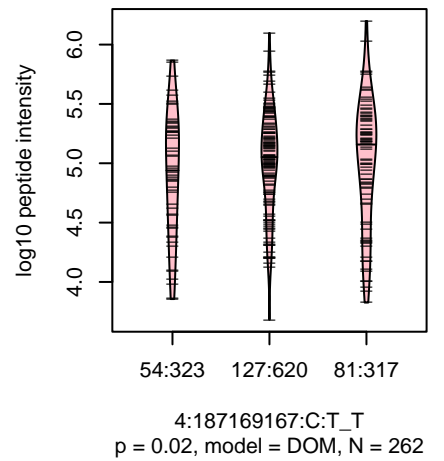**QLGLPAPPDVPDHAAYHPFR pc4  
rs2276814 REF**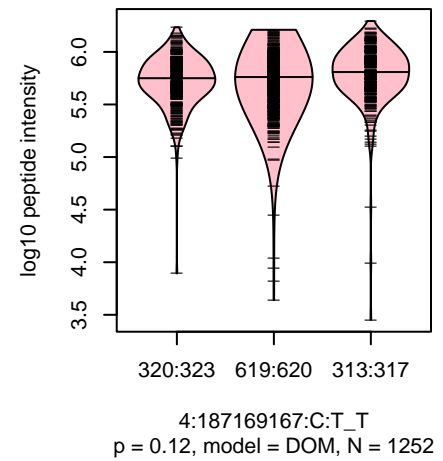**LLGLPAPPDVPDHAAYHPFR pc4  
rs2276814 ALT**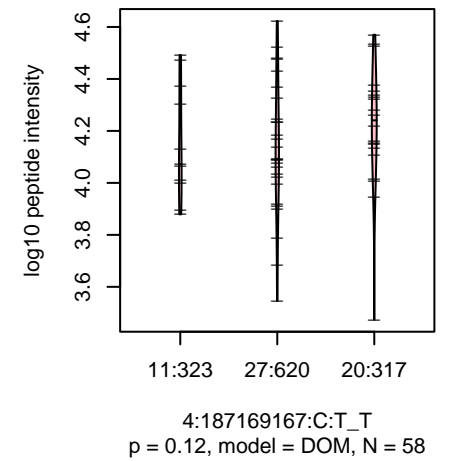**AFITNFSMIIDGMTYPGIK pc3  
rs13072536 REF**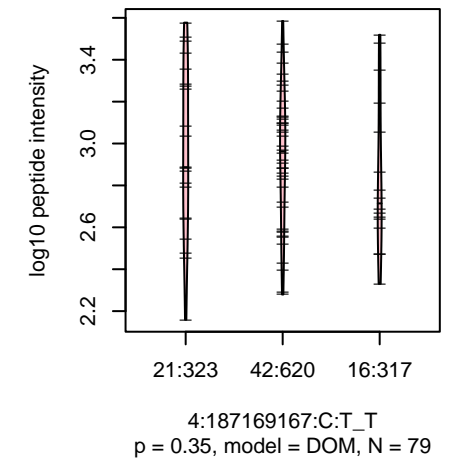

Locus: 180 (Sort: 207)  
Status: Not replicated  
80% power: No  
SNP: 4:187169167:C:T  
rsID: rs1973612  
UniProtID: B7ZKJ8  
HGNC gene: ITIH4  
Type: Trans-pQTL

**ORM2 [cis]**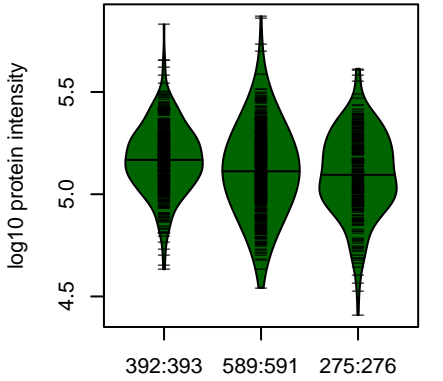

9:117080970:G:C\_C  
 $p = 1.3e-12$ ,  $\beta = -0.273$ ,  $N = 1256$

**TLMFGSYLDDEK pc2**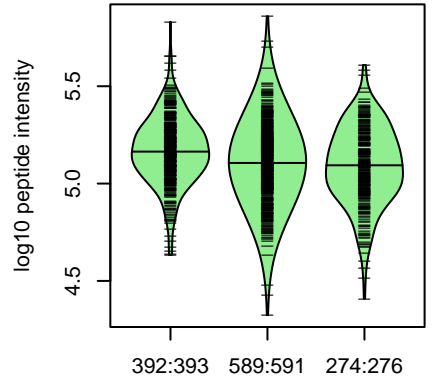

9:117080970:G:C\_C  
 $p = 1.3e-13$ ,  $\beta = -0.285$ ,  $N = 1255$

**NWGLSFYADKPETTK pc3**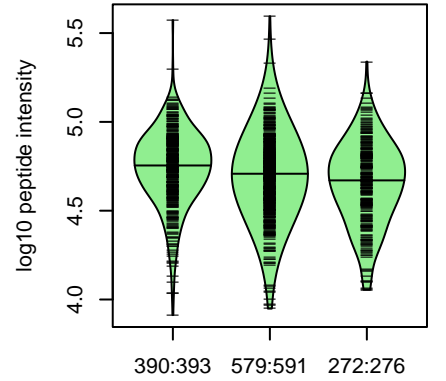

9:117080970:G:C\_C  
 $p = 7.2e-10$ ,  $\beta = -0.239$ ,  $N = 1241$

**SDVMYTDWK pc2**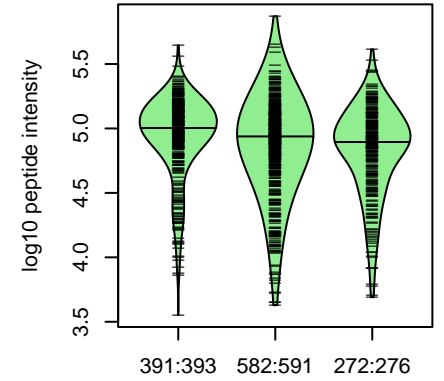

9:117080970:G:C\_C  
 $p = 1.9e-08$ ,  $\beta = -0.218$ ,  $N = 1245$

**WFYIASAFR pc2**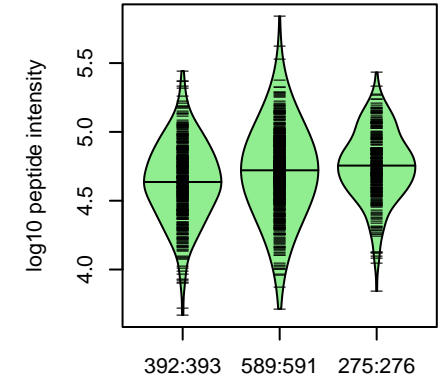

9:117080970:G:C\_C  
 $p = 1.9e-07$ ,  $\beta = 0.201$ ,  $N = 1256$

**P19652 NP2**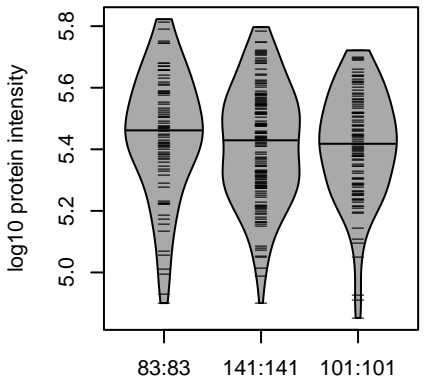

rs2787335  
 $p = 0.52$ ,  $\beta = -0.0476$ ,  $N = 325$

**TLMFGSYLDDEK pc2**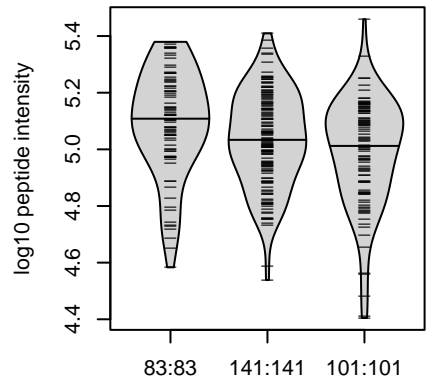

rs2787335  
 $p = 8.4e-05$ ,  $\beta = -0.284$ ,  $N = 325$

**SDVMYTDWK pc2**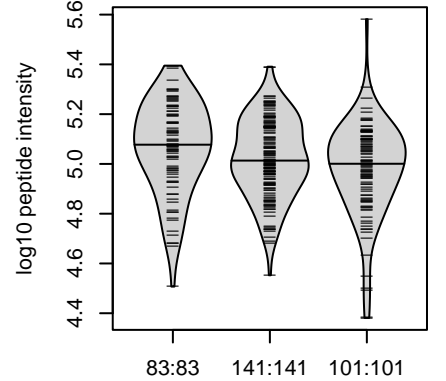

rs2787335  
 $p = 0.00066$ ,  $\beta = -0.247$ ,  $N = 325$

**WFYIASAFR pc2**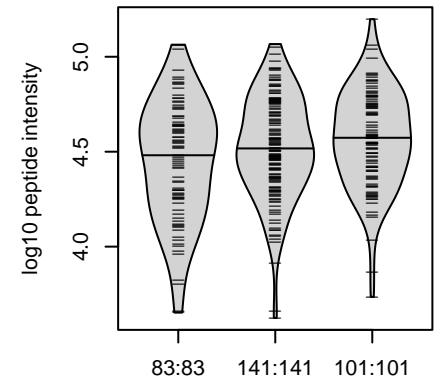

rs2787335  
 $p = 7e-04$ ,  $\beta = 0.246$ ,  $N = 325$

**EHVAHLLFLR pc3**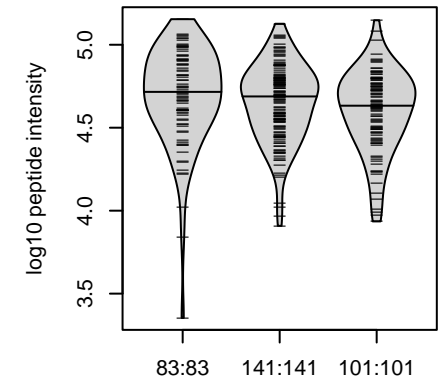

rs2787335  
 $p = 0.0024$ ,  $\beta = -0.221$ ,  $N = 325$

Locus: 181 (Sort: 208)  
 Status: Not replicated  
 80% power: No  
 SNP: 9:117080970:G:C  
 rsID: rs2787335  
 UniProtID: P19652  
 HGNC gene: ORM2  
 Type: Cis-pQTL

**HLA-C [cis]**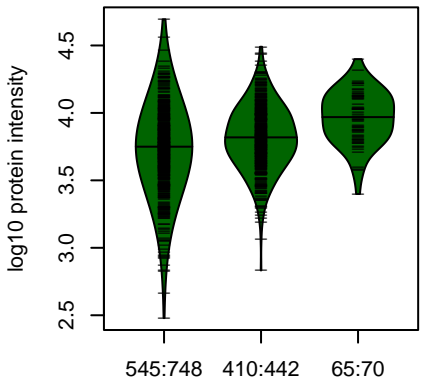

6:31328756:G:A\_G  
 $p = 1.4e-12$ ,  $\beta = 0.356$ ,  $N = 1020$

**SWTAADTAAQITQR pc2**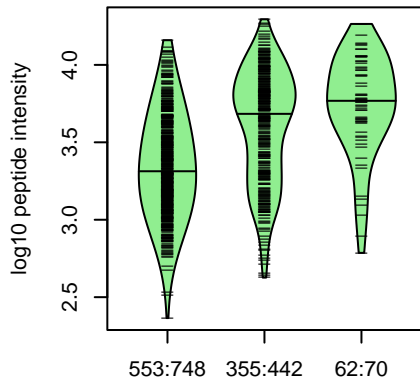

6:31328756:G:A\_G  
 $p = 7.2e-35$ ,  $\beta = 0.616$ ,  $N = 970$

**THVTHHPLSDHEATLR pc4**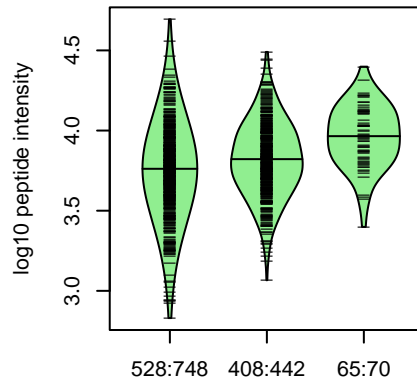

6:31328756:G:A\_G  
 $p = 3.5e-11$ ,  $\beta = 0.335$ ,  $N = 1001$

**DYIALNEDLR pc2**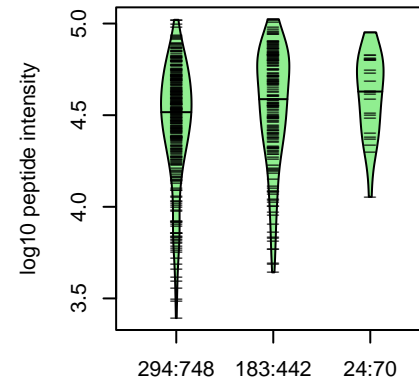

6:31328756:G:A\_G  
 $p = 1.9e-05$ ,  $\beta = 0.32$ ,  $N = 501$

**FDSAASPR pc2**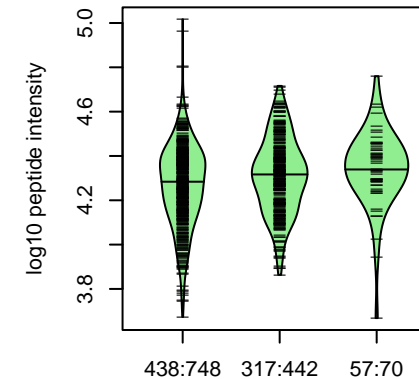

6:31328756:G:A\_G  
 $p = 7.9e-05$ ,  $\beta = 0.22$ ,  $N = 812$

**P10321 NP1**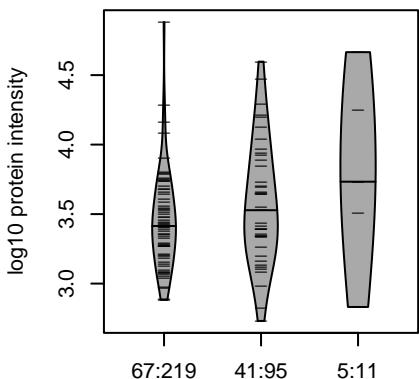

rs9266289  
 $p = 0.85$ ,  $\beta = -0.0292$ ,  $N = 113$

**SWTAADTAAQITQR pc2**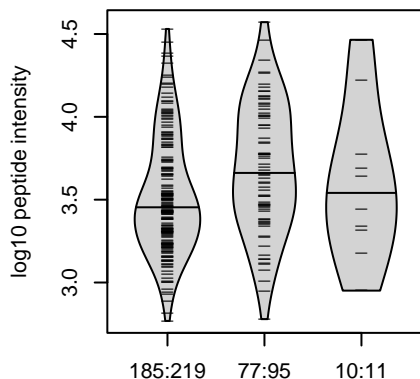

rs9266289  
 $p = 0.0014$ ,  $\beta = 0.345$ ,  $N = 272$

**FDSAASPR pc2**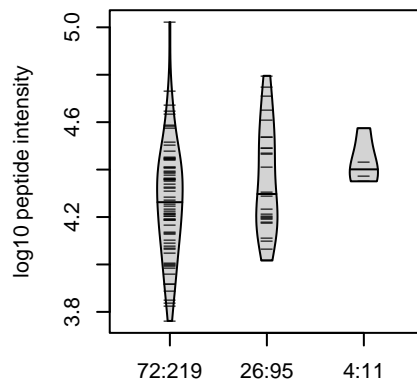

rs9266289  
 $p = 0.18$ ,  $\beta = 0.236$ ,  $N = 102$

**DYIALNEDLR pc2**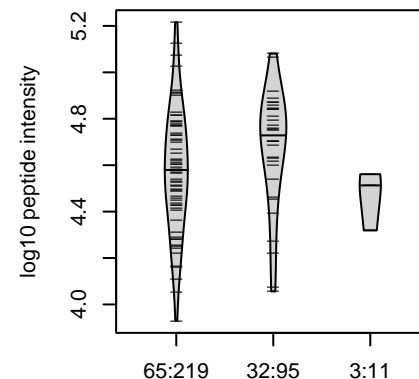

rs9266289  
 $p = 0.34$ ,  $\beta = 0.169$ ,  $N = 100$

**GYDQSAYDGK pc2**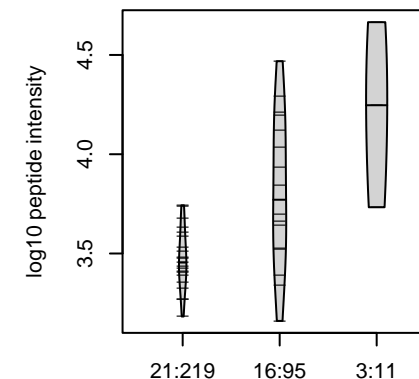

rs9266289  
 $p = 0.35$ ,  $\beta = 0.22$ ,  $N = 40$

Locus: 182 (Sort: 209)  
 Status: Not replicated  
 80% power: No  
 SNP: 6:31328756:G:A  
 rsID: rs9266289  
 UniProtID: P10321  
 HGNC gene: HLA-C  
 Type: Cis-pQTL

**FISVGYVDDTQFVR pc2  
rs1050437 REF**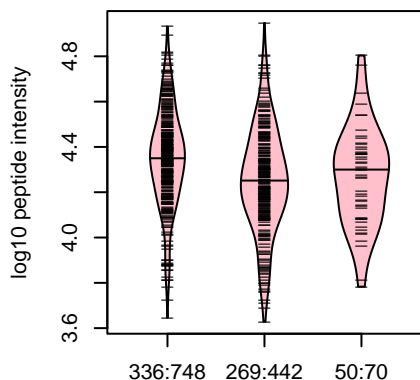

6:31328756:G:A\_G  
 $p = 1.5e-09$ , model = REC,  $N = 655$

**AYLEGCVEWLR pc2  
rs1050686 REF**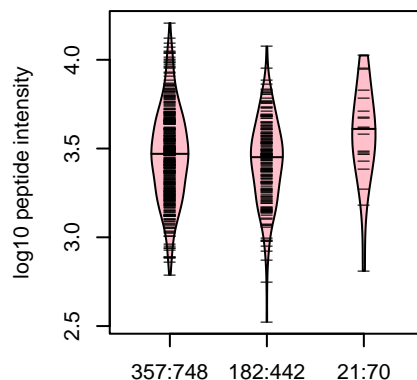

6:31328756:G:A\_G  
 $p = 0.0047$ , model = REC,  $N = 560$

**AYLEGCVEWLR pc3  
rs1050686 REF**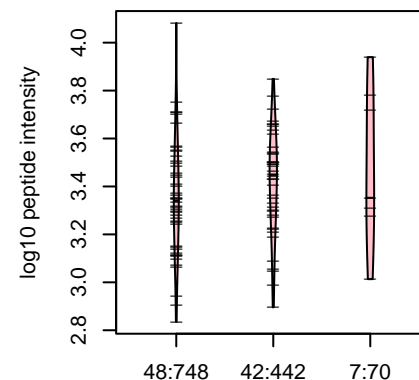

6:31328756:G:A\_G  
 $p = 0.041$ , model = REC,  $N = 97$

**WAAVVVPSGQEQR pc2  
rs707908 REF**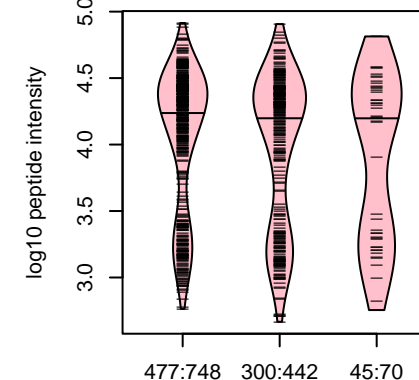

6:31328756:G:A\_G  
 $p = 0.21$ , model = REC,  $N = 822$



**ITLN1 [cis]**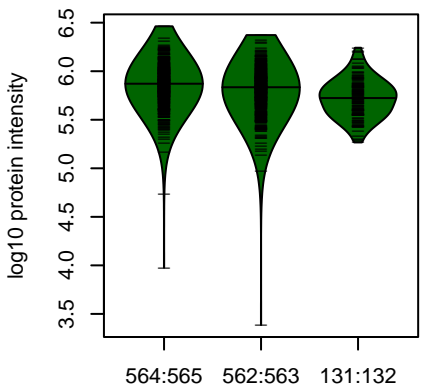

1:160850936:T:C\_T  
 $p = 1.4e-12$ ,  $\beta = -0.299$ ,  $N = 1257$

**WSSQQGSK pc2**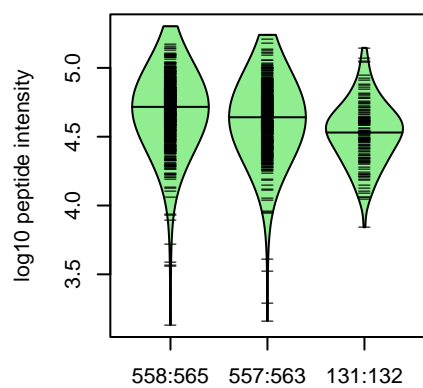

1:160850936:T:C\_T  
 $p = 4.5e-15$ ,  $\beta = -0.331$ ,  $N = 1246$

**NPGYYDIQAK pc2**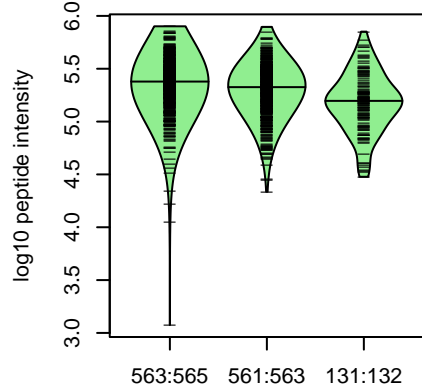

1:160850936:T:C\_T  
 $p = 2.3e-14$ ,  $\beta = -0.322$ ,  $N = 1255$

**AANALCAGMR pc2**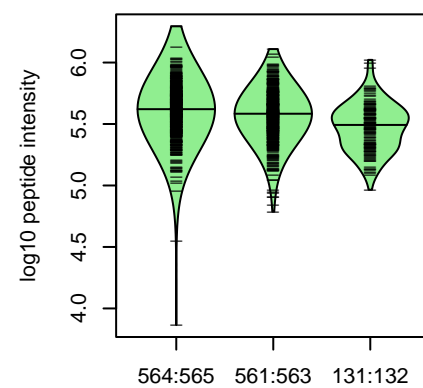

1:160850936:T:C\_T  
 $p = 3e-13$ ,  $\beta = -0.308$ ,  $N = 1256$

**EFTAGFVQFR pc2**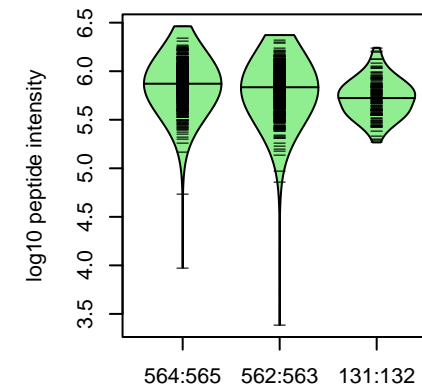

1:160850936:T:C\_T  
 $p = 1.4e-12$ ,  $\beta = -0.299$ ,  $N = 1257$

**Q8WWA0 NP5**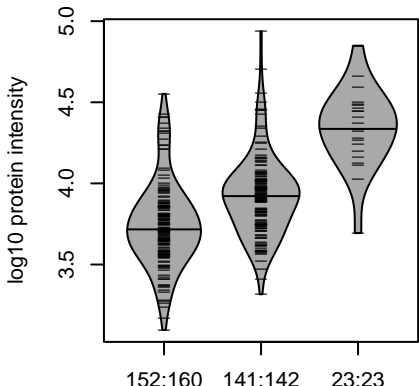

rs2236515  
 $p = 1.9e-22$ ,  $\beta = 0.82$ ,  $N = 316$

**EFTAGFVQFR pc2**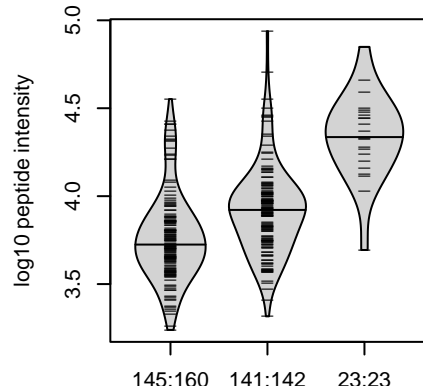

rs2236515  
 $p = 1.5e-20$ ,  $\beta = 0.783$ ,  $N = 309$

**NPGYYDIQAK pc2**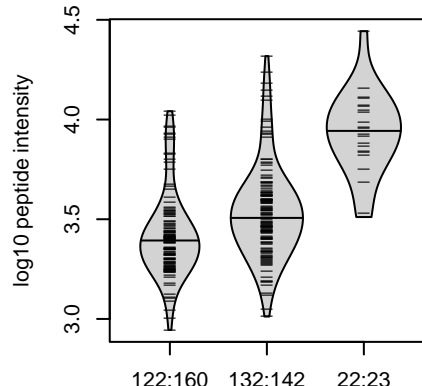

rs2236515  
 $p = 3.2e-15$ ,  $\beta = 0.709$ ,  $N = 276$

**EWTCSSPSLPR pc2**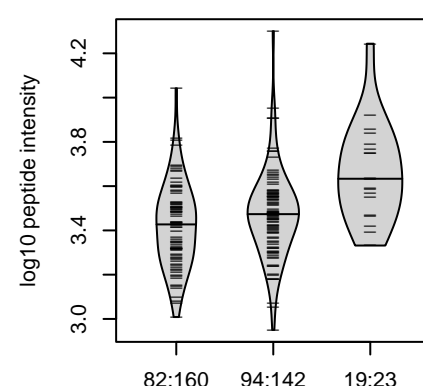

rs2236515  
 $p = 6.1e-06$ ,  $\beta = 0.482$ ,  $N = 195$

**AANALCAGMR pc2**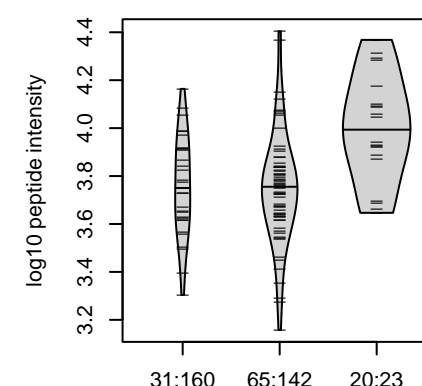

rs2236515  
 $p = 0.01$ ,  $\beta = 0.351$ ,  $N = 116$

Locus: 183 (Sort: 210)  
 Status: Not replicated  
 80% power: No  
 SNP: 1:160850936:T:C  
 rsID: rs2236515  
 UniProtID: Q8WWA0  
 HGNC gene: ITLN1  
 Type: Cis-pQTL

**TIMP3 [cis]**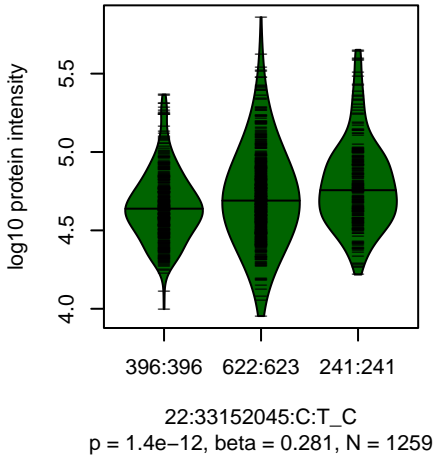**YHLGCNCK pc2**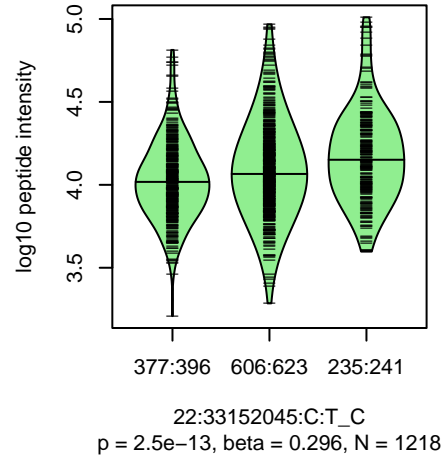**SCYYLPCFVTSK pc2**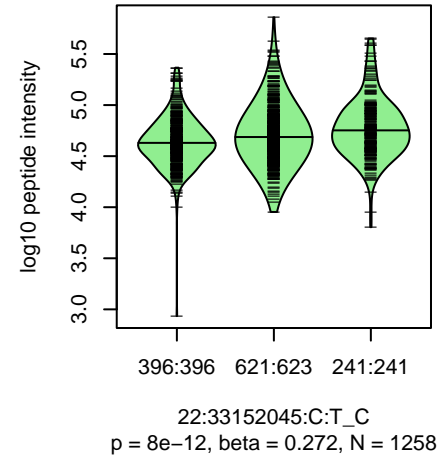**MPHVQYIHTEASESLCGLK pc4**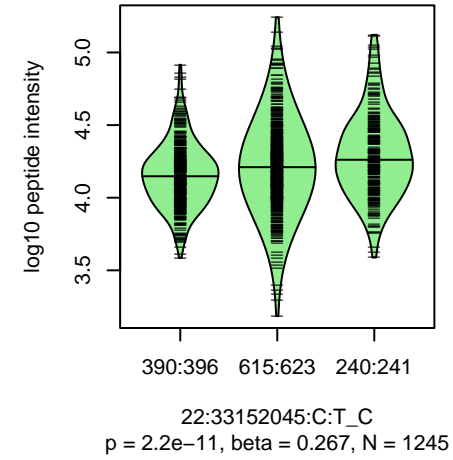**EGPFGTLVYTIK pc2**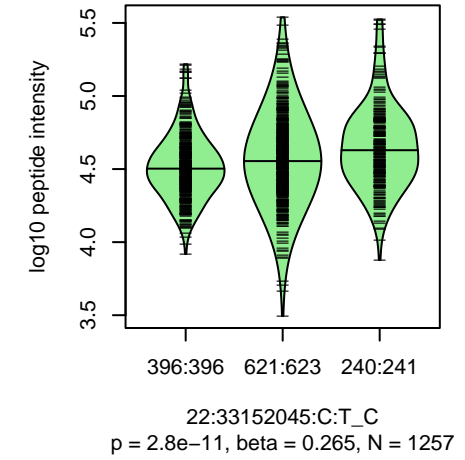**P35625 NP4**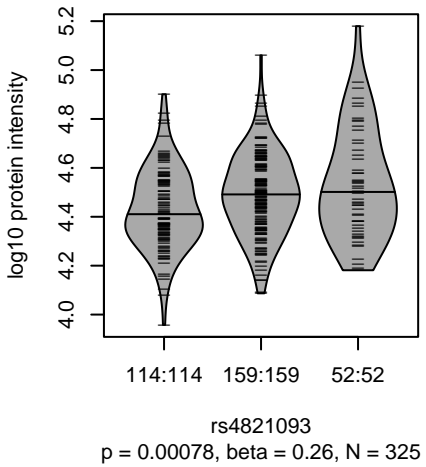**MPHVQYIHTEASESLCGLK pc4**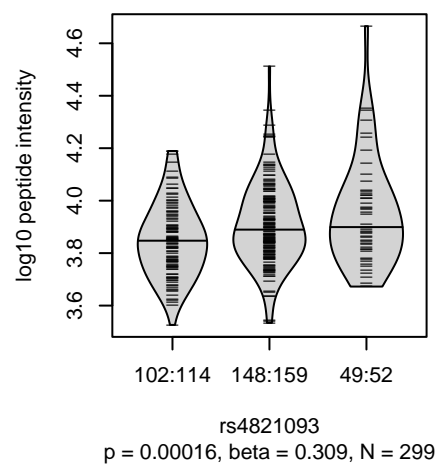**SCYYLPCFVTSK pc2**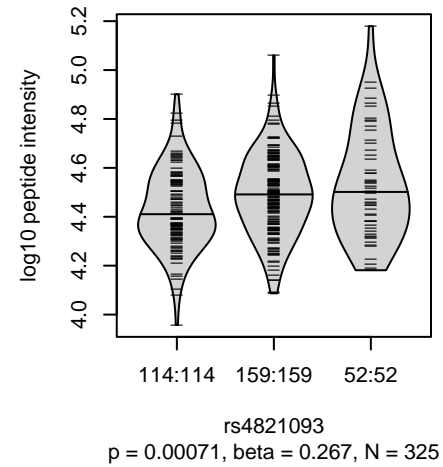**EGPFGTLVYTIK pc2**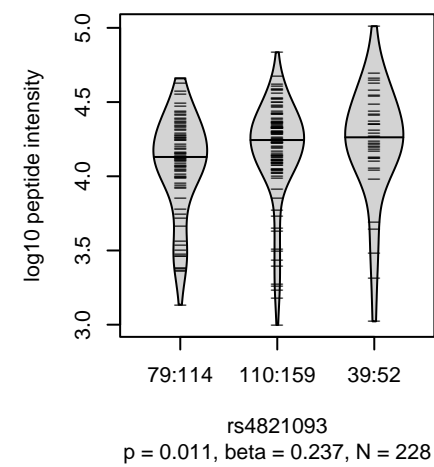**MYTGLCNFVER pc2**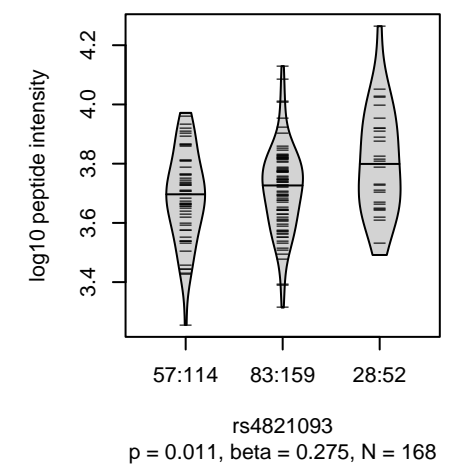

Locus: 184 (Sort: 211)  
 Status: Not replicated  
 80% power: No  
 SNP: 22:33152045:C:T  
 rsID: rs4821093  
 UniProtID: P35625  
 HGNC gene: TIMP3  
 Type: Cis-pQTL

**HLA-B [cis]**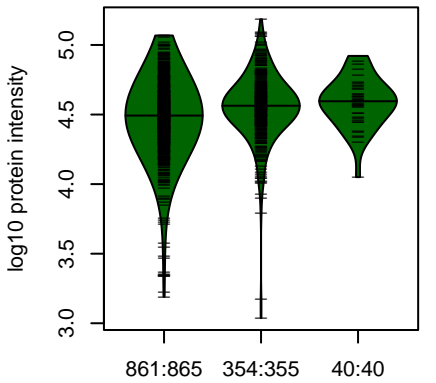

6:31105633:C:T\_C  
 $p = 1.4e-12$ ,  $\beta = 0.366$ ,  $N = 1255$

**SWTAADTAAQITQR pc2**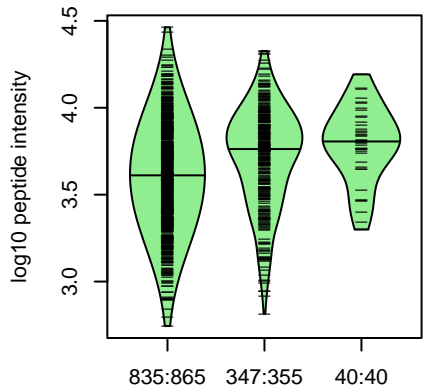

6:31105633:C:T\_C  
 $p = 2.5e-15$ ,  $\beta = 0.411$ ,  $N = 1222$

**FSDAASPR pc2**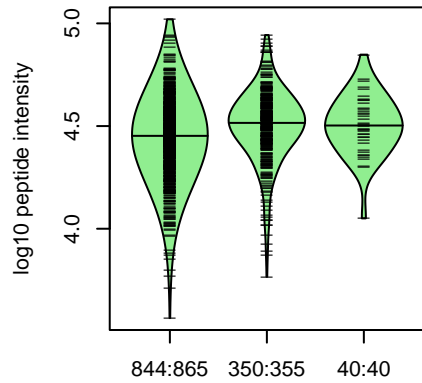

6:31105633:C:T\_C  
 $p = 2.8e-11$ ,  $\beta = 0.346$ ,  $N = 1234$

**DYIALNEDLR pc2**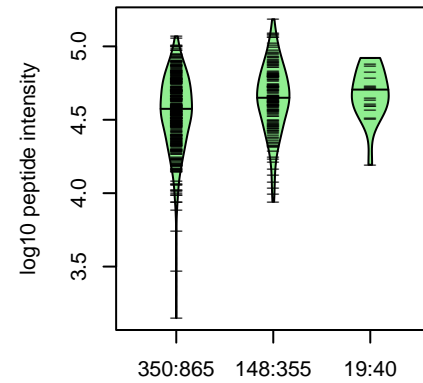

6:31105633:C:T\_C  
 $p = 9.3e-08$ ,  $\beta = 0.417$ ,  $N = 517$

**DGEDQTQDTELVETRPAGDR pc3**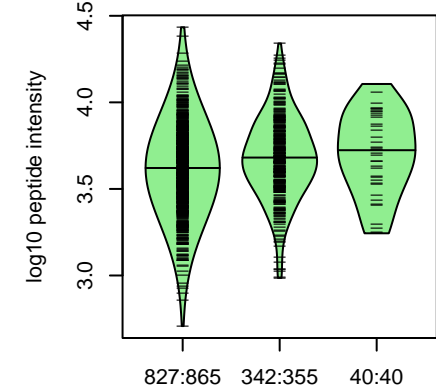

6:31105633:C:T\_C  
 $p = 3e-07$ ,  $\beta = 0.269$ ,  $N = 1209$

**P01889 NP2**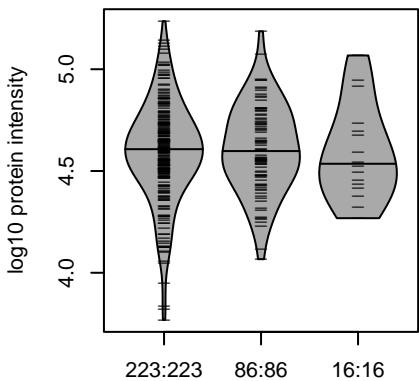

rs2074478  
 $p = 0.81$ ,  $\beta = 0.0229$ ,  $N = 325$

**DYIALNEDLR pc2**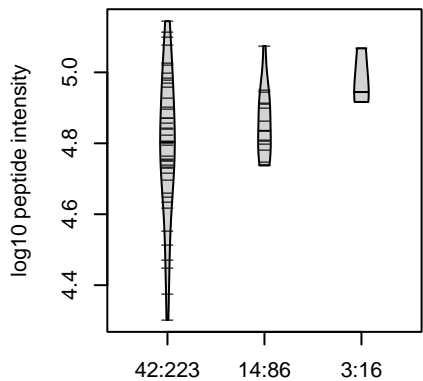

rs2074478  
 $p = 0.058$ ,  $\beta = 0.41$ ,  $N = 59$

**SWTAADTAAQITQR pc2**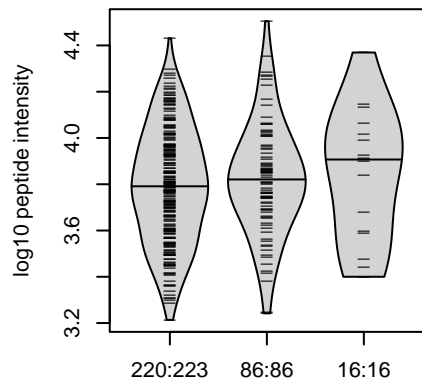

rs2074478  
 $p = 0.32$ ,  $\beta = 0.0947$ ,  $N = 322$

**APWIEQEGPEYWDR pc2**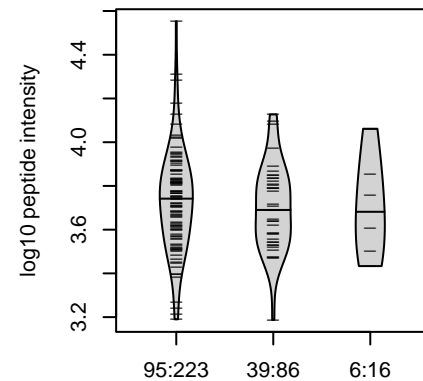

rs2074478  
 $p = 0.37$ ,  $\beta = -0.132$ ,  $N = 140$

**YTCHVQHEGLPK pc3**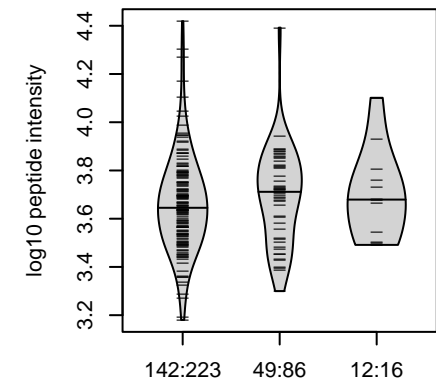

rs2074478  
 $p = 0.37$ ,  $\beta = 0.105$ ,  $N = 203$

Locus: 185 (Sort: 212)  
 Status: Not replicated  
 80% power: No  
 SNP: 6:31105633:C:T  
 rsID: rs2074478  
 UniProtID: P01889  
 HGNC gene: HLA-B  
 Type: Cis-pQTL

**FISVG YVDDTQFVR pc2  
rs1050437 REF**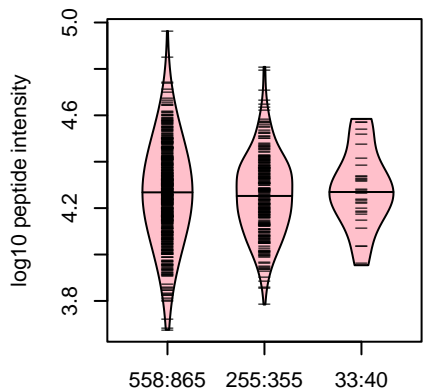

6:31105633:C:T\_C  
 $p = 0.0036$ , model = REC,  $N = 846$

**GEPRFISVG YVDDTQFVR pc3  
rs1050437 REF**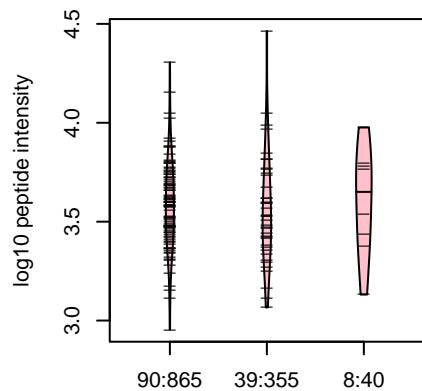

6:31105633:C:T\_C  
 $p = 0.069$ , model = DOM,  $N = 137$

**WAAVVVPSGEEQR pc2  
rs707908;rs1736924 ALT**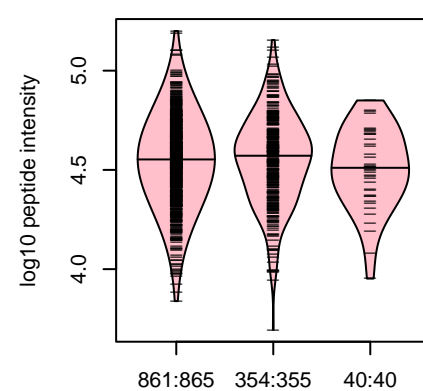

6:31105633:C:T\_C  
 $p = 1$ , model = DOM,  $N = 1255$

**SERPINA10 [trans]**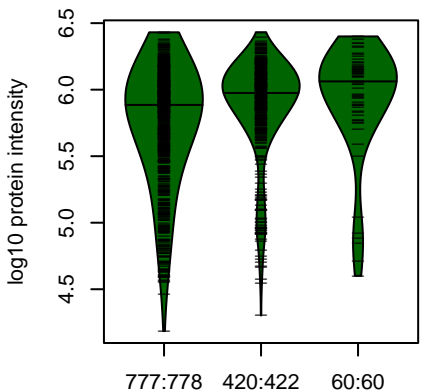

13:113846989:G:C\_C  
 $p = 1.4e-12$ ,  $\beta = 0.338$ ,  $N = 1257$

**YEMHELLR pc2**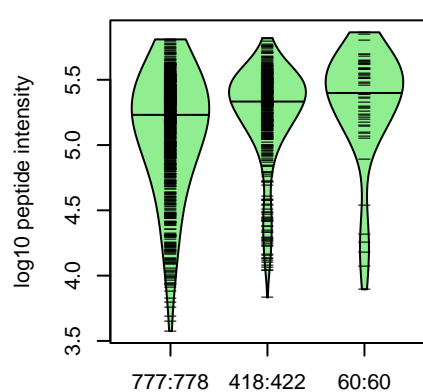

13:113846989:G:C\_C  
 $p = 3e-14$ ,  $\beta = 0.362$ ,  $N = 1255$

**RIFSPFADLSELSATGR pc3**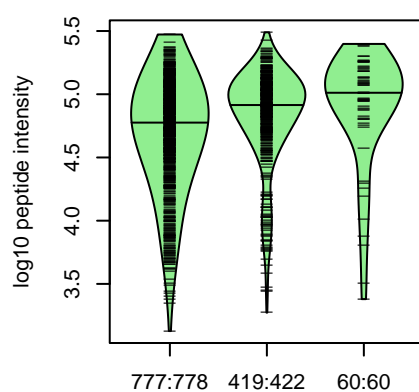

13:113846989:G:C\_C  
 $p = 1.1e-12$ ,  $\beta = 0.339$ ,  $N = 1256$

**VPMYMGAGK pc2**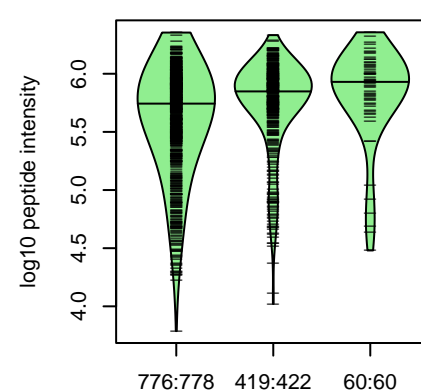

13:113846989:G:C\_C  
 $p = 1.5e-12$ ,  $\beta = 0.337$ ,  $N = 1255$

**LILDVYILFK pc2**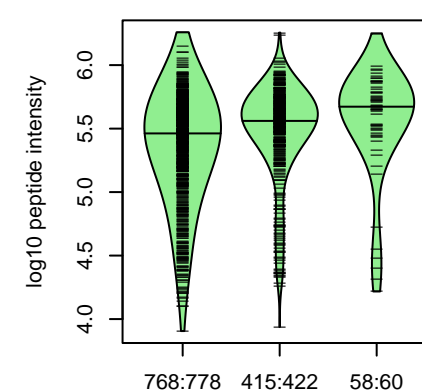

13:113846989:G:C\_C  
 $p = 2.8e-12$ ,  $\beta = 0.336$ ,  $N = 1241$

**G3V2W1 NP2**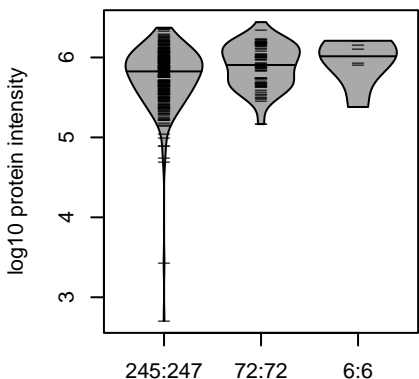

rs9549688  
 $p = 0.017$ ,  $\beta = 0.273$ ,  $N = 323$

**FASTFDK pc2**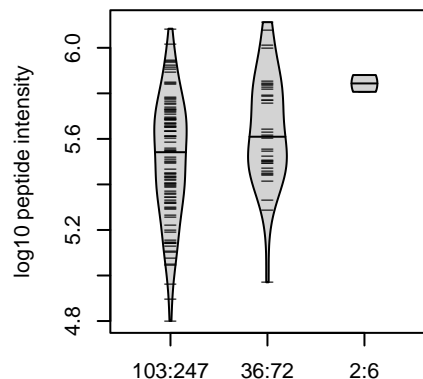

rs9549688  
 $p = 0.00095$ ,  $\beta = 0.555$ ,  $N = 141$

**VDRPFHFMIYEETSGMILLFLGR pc.**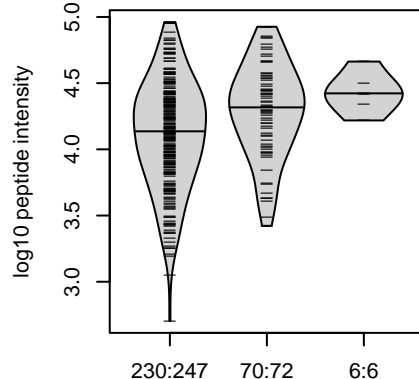

rs9549688  
 $p = 0.0042$ ,  $\beta = 0.331$ ,  $N = 306$

**RIFSPFADLSELSATGR pc3**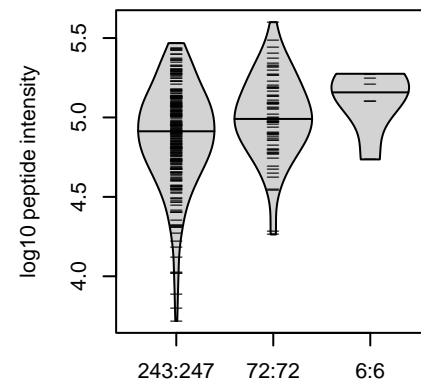

rs9549688  
 $p = 0.0061$ ,  $\beta = 0.313$ ,  $N = 321$

**AWLMASR pc2**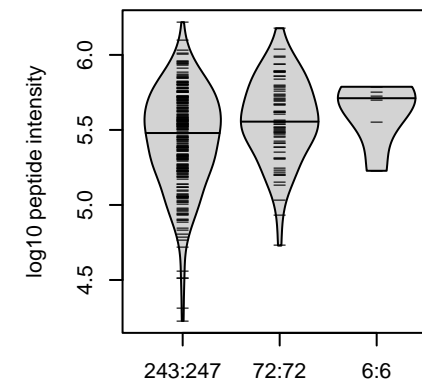

rs9549688  
 $p = 0.0067$ ,  $\beta = 0.31$ ,  $N = 321$

**NLELGLTQGSFAFIHK pc3  
rs2232700 REF**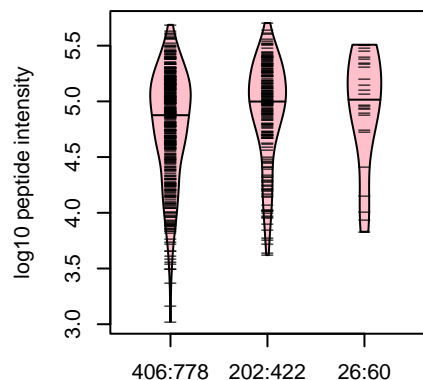

13:113846989:G:C\_C  
 $p = 0.093$ ,  $\text{model} = \text{REC}$ ,  $N = 634$

**ETLSRNLELGLTQGSFAFIHK pc4  
rs2232700 REF**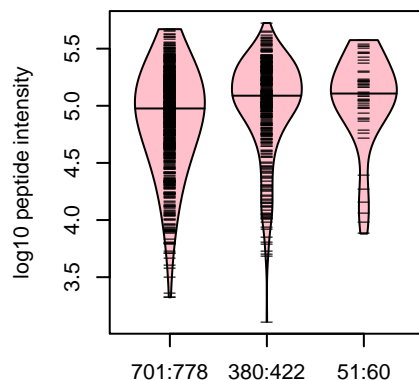

13:113846989:G:C\_C  
 $p = 0.19$ ,  $\text{model} = \text{DOM}$ ,  $N = 1132$

**NLELGLSQQGSFAFIHK pc3  
rs2232700 ALT**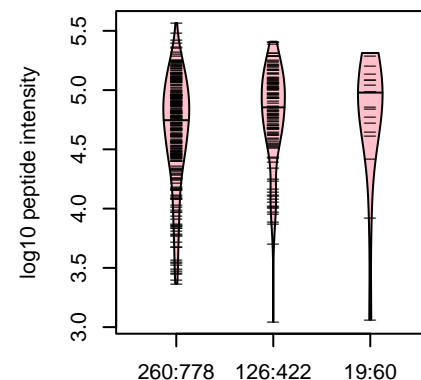

13:113846989:G:C\_C  
 $p = 0.24$ ,  $\text{model} = \text{REC}$ ,  $N = 405$

Locus: 186 (Sort: 213)  
 Status: Not replicated  
 80% power: No  
 SNP: 13:113846989:G:C  
 rsID: rs9549688  
 UniProtID: G3V2W1  
 HGNC gene: SERPINA10  
 Type: Trans-pQTL

**BPI [cis]**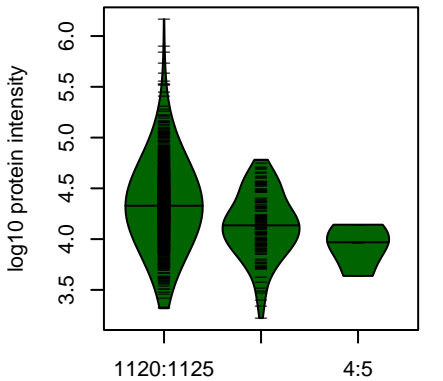

20:36944749:C:A\_A  
 $p = 1.4e-12$ ,  $\beta = -0.612$ ,  $N = 1253$

**IPDYSDSFK pc2**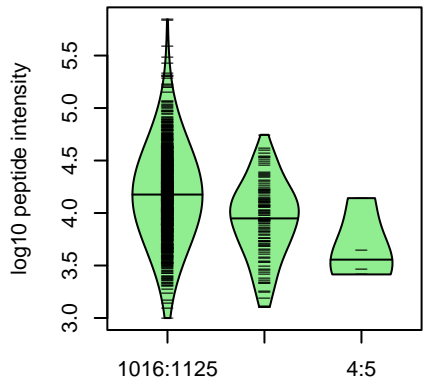

20:36944749:C:A\_A  
 $p = 1.3e-12$ ,  $\beta = -0.644$ ,  $N = 1135$

**GFPLTPAR pc2**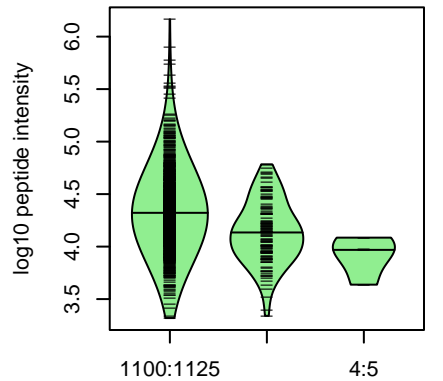

20:36944749:C:A\_A  
 $p = 3.3e-12$ ,  $\beta = -0.616$ ,  $N = 1226$

**FFGTFLPEVAK pc2**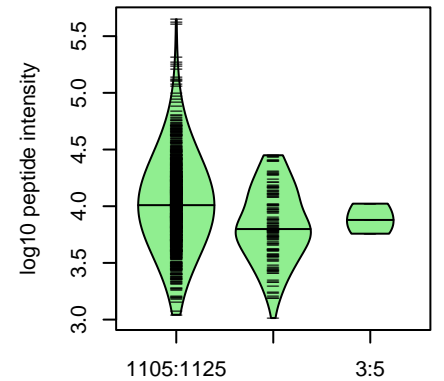

20:36944749:C:A\_A  
 $p = 1.1e-10$ ,  $\beta = -0.572$ ,  $N = 1234$

**GLDYASQQGTAALQK pc2**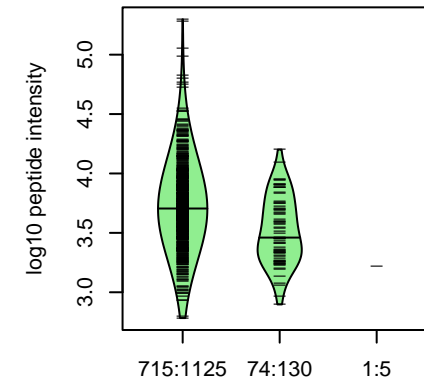

20:36944749:C:A\_A  
 $p = 4e-09$ ,  $\beta = -0.688$ ,  $N = 790$

**P17213 NP4**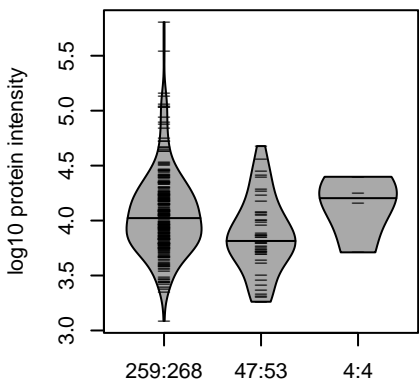

rs116381416  
 $p = 0.01$ ,  $\beta = -0.343$ ,  $N = 310$

**FFGTFLPEVAK pc2**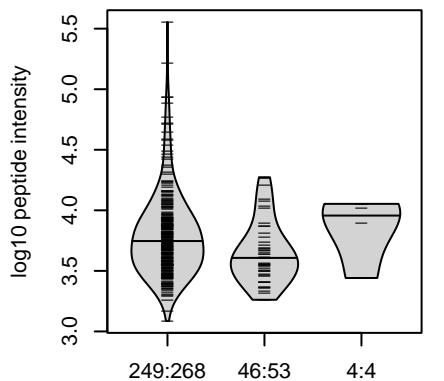

rs116381416  
 $p = 0.052$ ,  $\beta = -0.265$ ,  $N = 299$

**FSISNANIK pc2**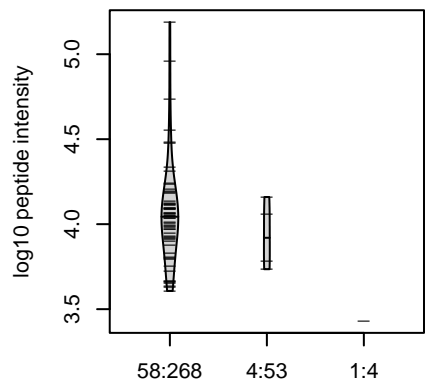

rs116381416  
 $p = 0.067$ ,  $\beta = -0.639$ ,  $N = 63$

**GFPLTPAR pc2**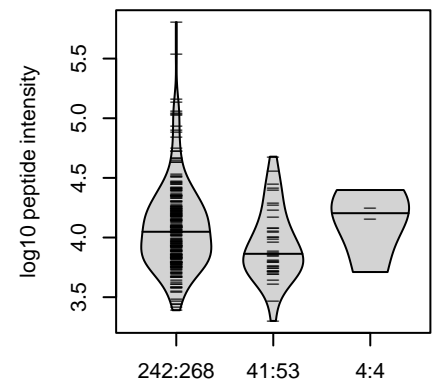

rs116381416  
 $p = 0.073$ ,  $\beta = -0.253$ ,  $N = 287$

**EFQLPSSQISMVNVGLK pc2**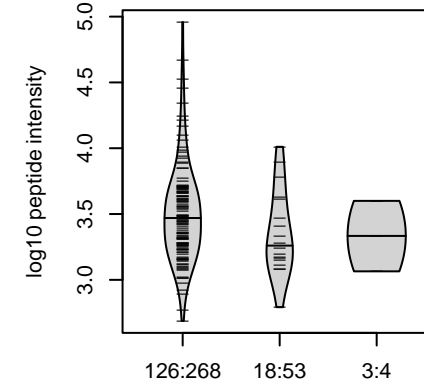

rs116381416  
 $p = 0.088$ ,  $\beta = -0.325$ ,  $N = 147$

Locus: 187 (Sort: 214)  
 Status: Not replicated  
 80% power: No  
 SNP: 20:36944749:C:A  
 rsID: rs116381416  
 UniProtID: P17213  
 HGNC gene: BPI  
 Type: Cis-pQTL

**LQPYFQTLVMTK pc2  
rs4358188 ALT**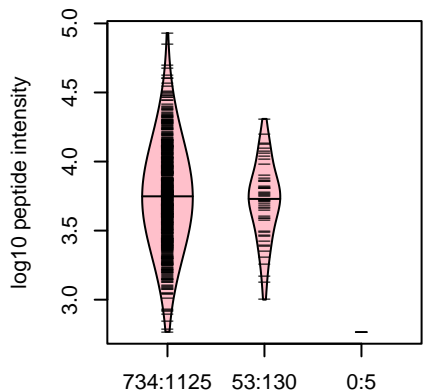

20:36944749:C:A\_A  
 $p = 9.4e-09$ ,  $\text{model} = \text{REC}$ ,  $N = 787$

**iEFYSENHHNPPPFAPPVMEFPAHDR  
rs5741804 REF**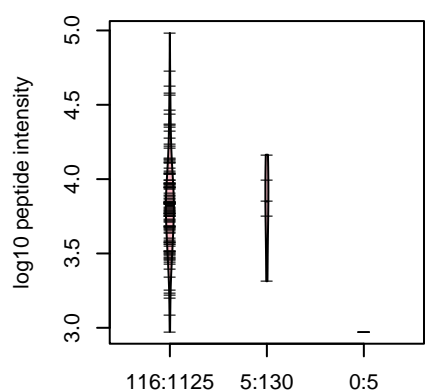

20:36944749:C:A\_A  
 $p = 0.012$ ,  $\text{model} = \text{REC}$ ,  $N = 121$

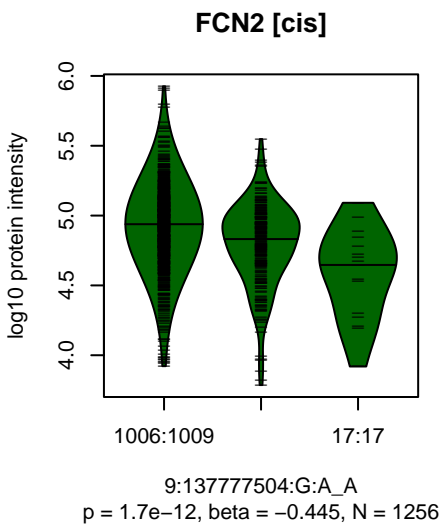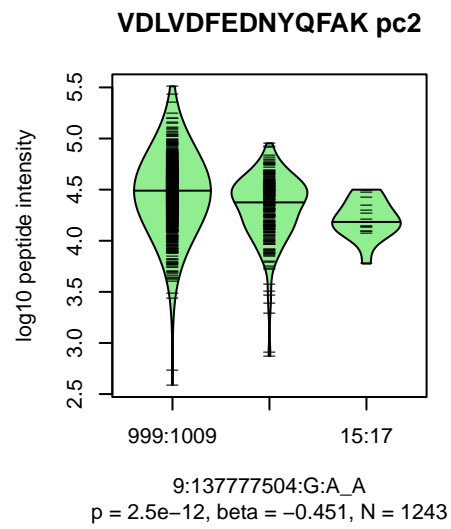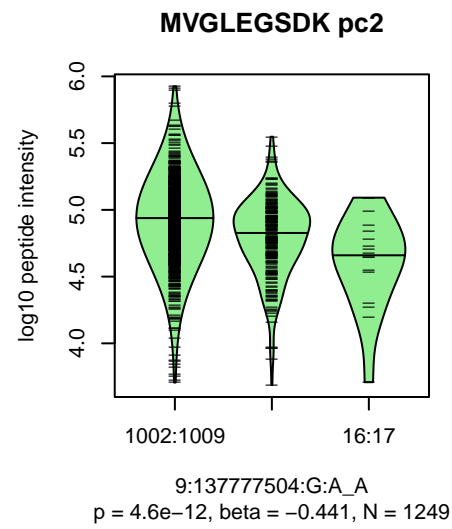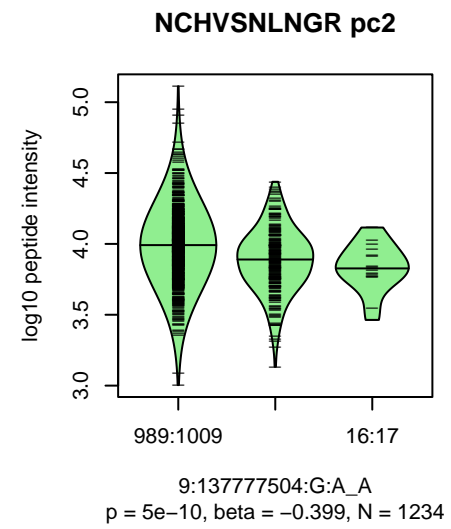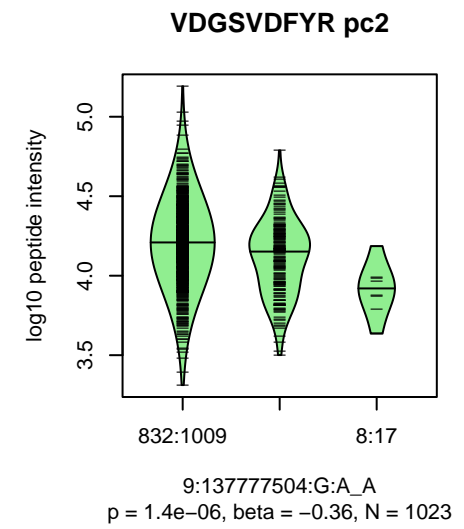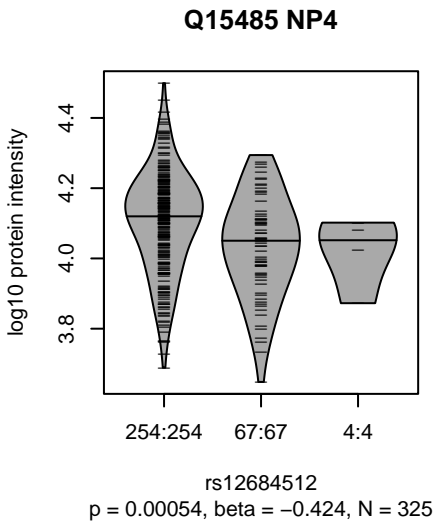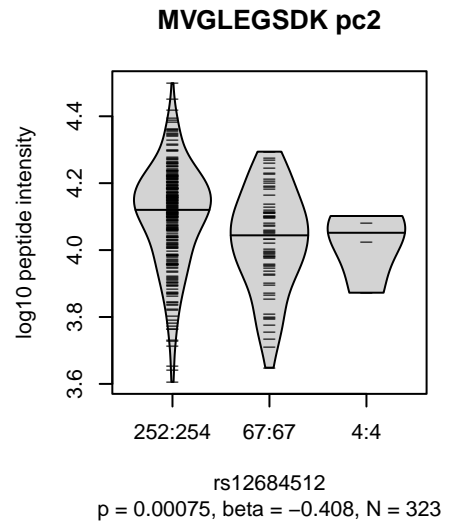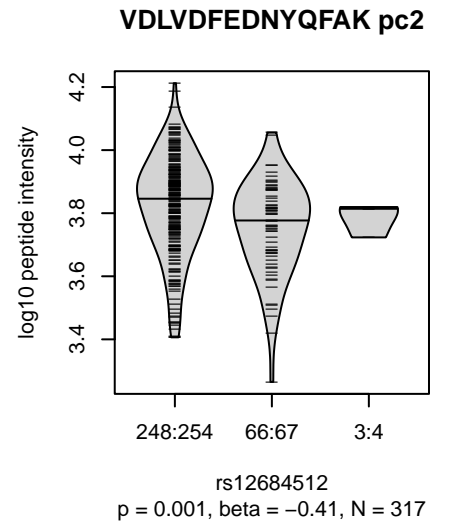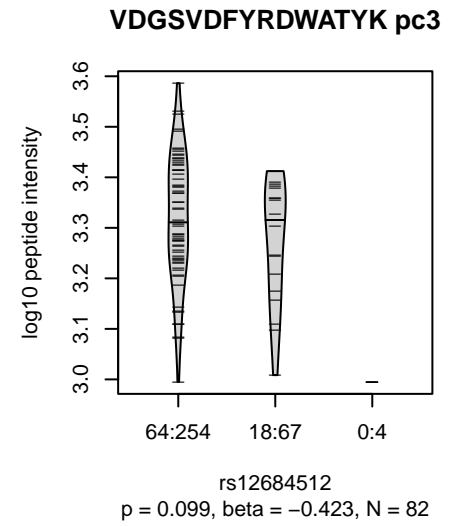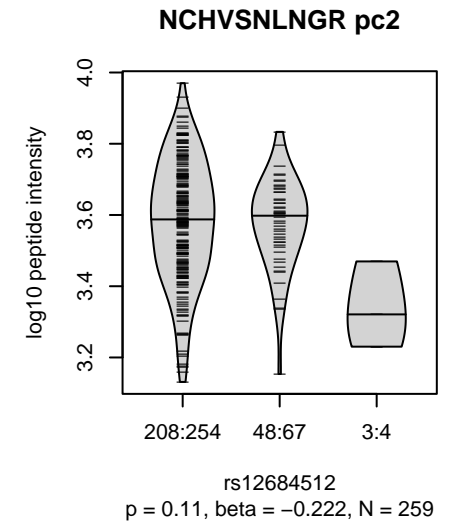

**DQDNDLNTGNCVAVMFQGAWWYK p**  
**rs7851696 REF**

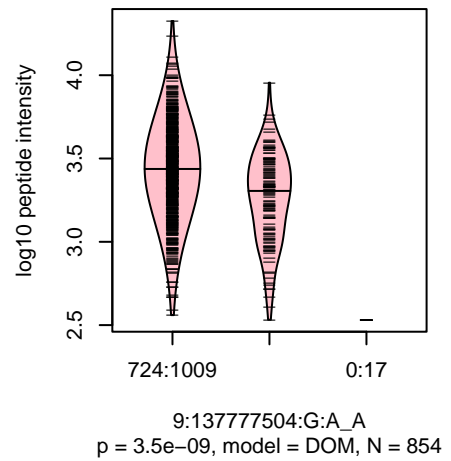

Locus: 188 (Sort: 215)  
Status: Not replicated  
80% power: No  
SNP: 9:137777504:G:A  
rsID: rs12684512  
UniProtID: Q15485  
HGNC gene: FCN2  
Type: Cis-pQTL

### GGTA1P [cis]

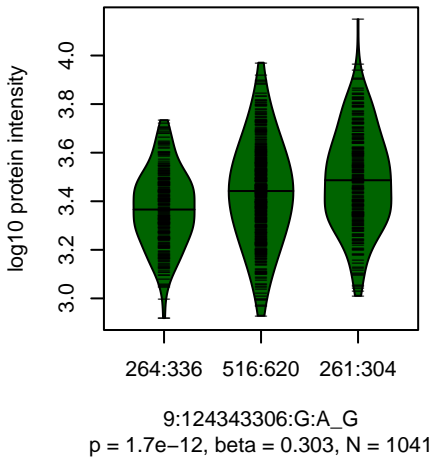

### NPEVDDSSAQK pc2

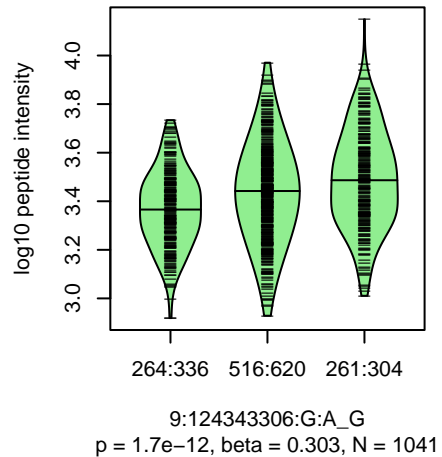

### Q4G0N0 NP2

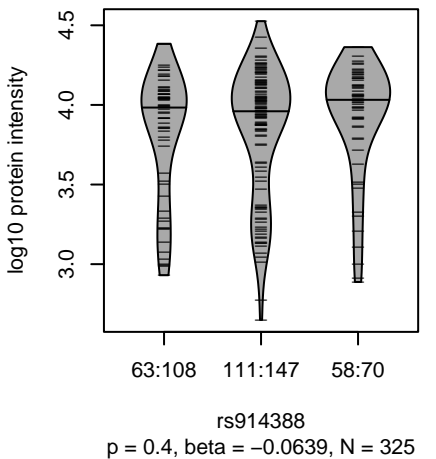

### MVGLEGS DK pc2

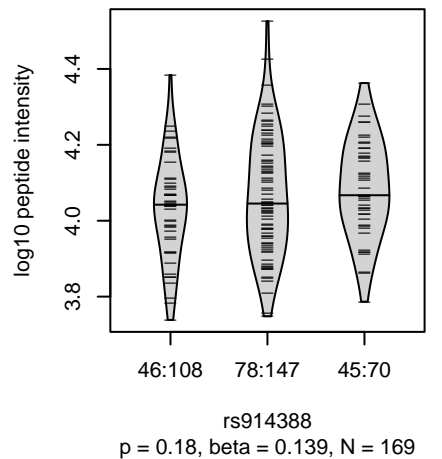

### NCHVSNLNGR pc2

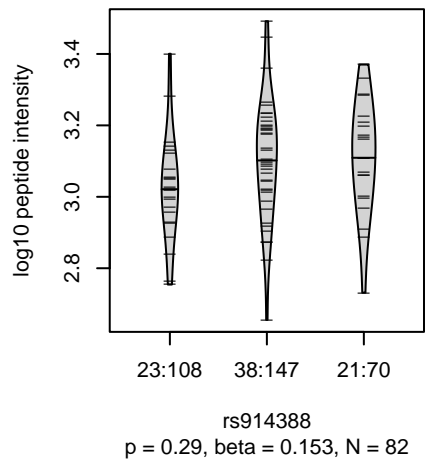

### VDLVDFEDNYQFAK pc2

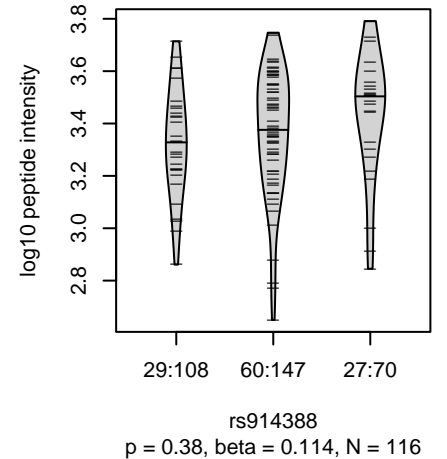

### VDGSVDFYR pc2

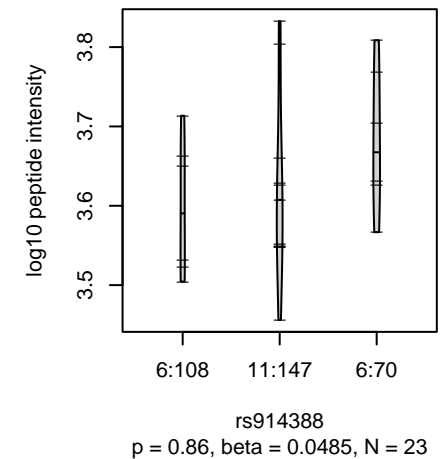

### DQDNDLNTGNCVAVMFQGAWWYK pc2 rs7851696 REF

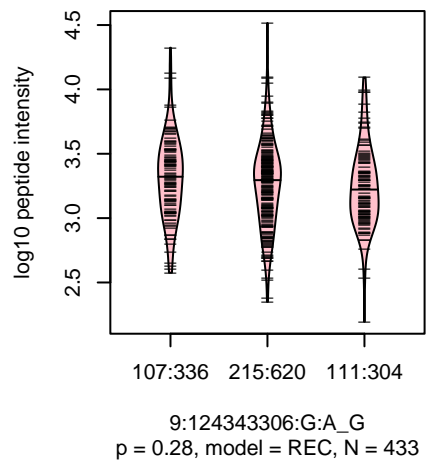

Locus: 189 (Sort: 216)  
Status: Not replicated  
80% power: No  
SNP: 9:124343306:G:A  
rsID: rs914388  
UniProtID: Q4G0N0  
HGNC gene: GGTA1P  
Type: Cis-pQTL

**PON2 [cis]**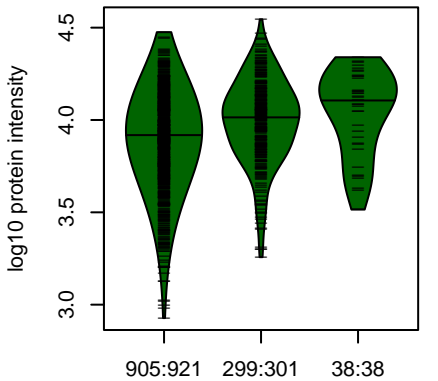

7:95061328:G:A\_A  
 $p = 1.7e-12$ ,  $\beta = 0.378$ ,  $N = 1242$

**YIYVADILAHEIHVLEK pc3**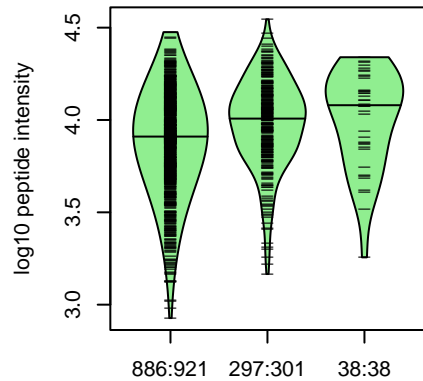

7:95061328:G:A\_A  
 $p = 1.8e-10$ ,  $\beta = 0.344$ ,  $N = 1221$

**LFVYDPNPPSSEVLR pc2**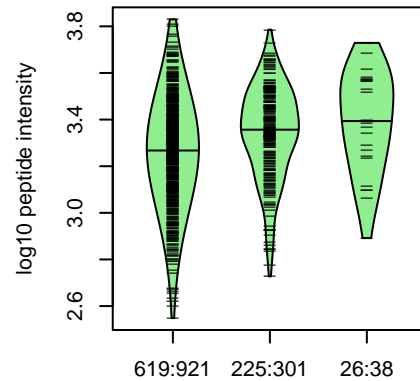

7:95061328:G:A\_A  
 $p = 7.3e-09$ ,  $\beta = 0.367$ ,  $N = 870$

**EVESVDLPHCHLIK pc3**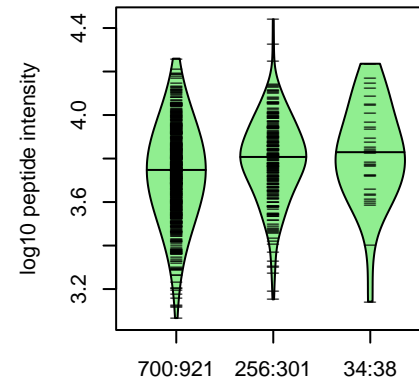

7:95061328:G:A\_A  
 $p = 1.1e-06$ ,  $\beta = 0.286$ ,  $N = 990$

**LLIGTLYHR pc2**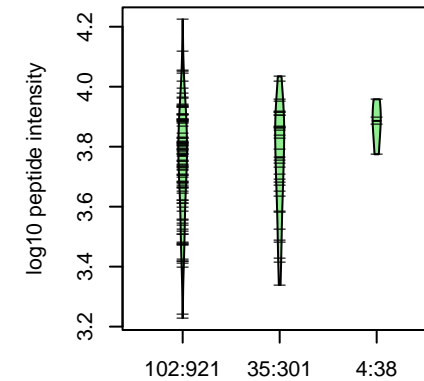

7:95061328:G:A\_A  
 $p = 0.25$ ,  $\beta = 0.181$ ,  $N = 141$

**A0A0J9YXF2 NP5**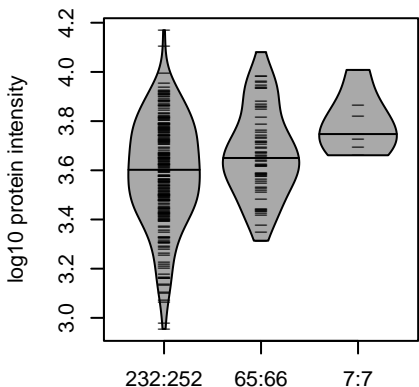

rs10261470  
 $p = 7e-04$ ,  $\beta = 0.388$ ,  $N = 304$

**YIYVADILAHEIHVLEK pc3**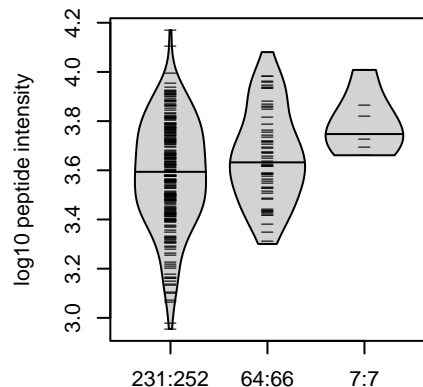

rs10261470  
 $p = 0.001$ ,  $\beta = 0.378$ ,  $N = 302$

**LFVYDPNPPSSEVLR pc2**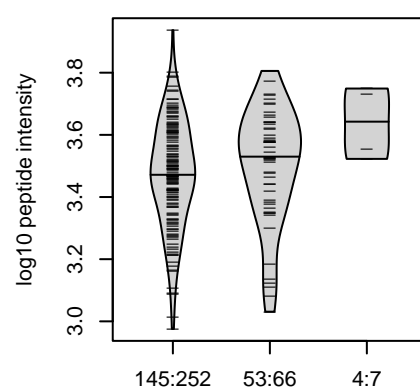

rs10261470  
 $p = 0.28$ ,  $\beta = 0.149$ ,  $N = 202$

**FEEAENSLHLK pc3  
rs12026 REF**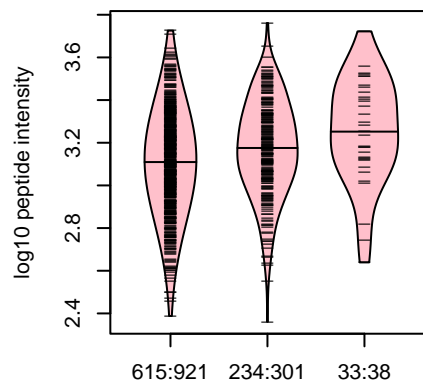

7:95061328:G:A\_A  
 $p = 3.1e-05$ ,  $\text{model} = \text{REC}$ ,  $N = 882$

**IQNILSEK pc2  
rs7493 REF**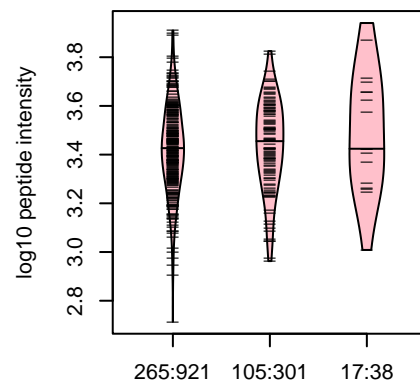

7:95061328:G:A\_A  
 $p = 0.016$ ,  $\text{model} = \text{REC}$ ,  $N = 387$

Locus: 190 (Sort: 217)

Status: Not replicated

80% power: No

SNP: 7:95061328:G:A

rsID: rs10261470

UniProtID: A0A0J9YXF2

HGNC gene: PON2

Type: Cis-pQTL



**PDCD5 [cis]**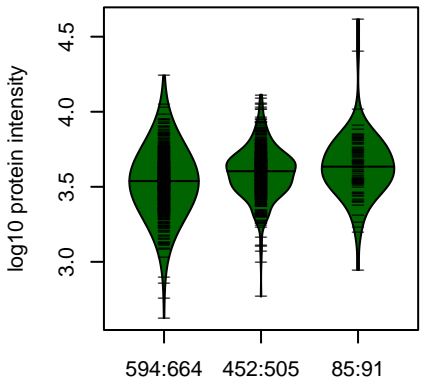

19:33083746:A:T\_T  
 $p = 1.8e-12$ ,  $\beta = 0.327$ ,  $N = 1131$

**AVENYLIQMAR pc2**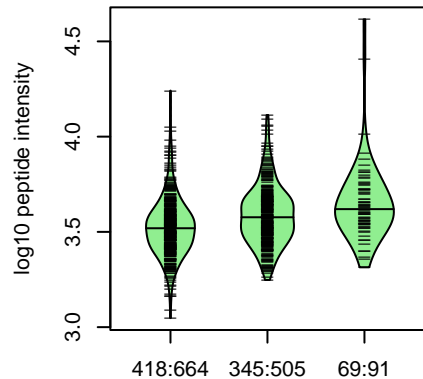

19:33083746:A:T\_T  
 $p = 7.9e-13$ ,  $\beta = 0.38$ ,  $N = 832$

**NSILAQVLDQSAR pc2**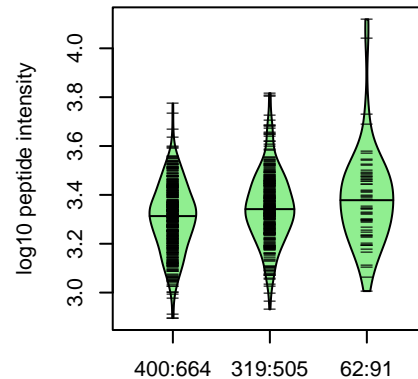

19:33083746:A:T\_T  
 $p = 1.2e-05$ ,  $\beta = 0.243$ ,  $N = 781$

**VSEQGLIEILK pc2**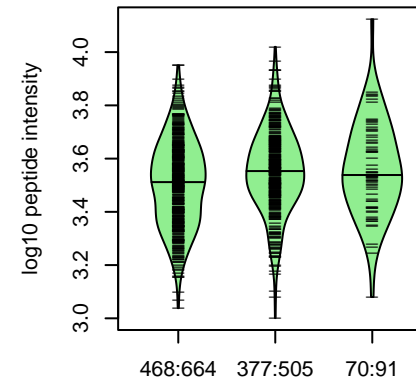

19:33083746:A:T\_T  
 $p = 4.6e-05$ ,  $\beta = 0.211$ ,  $N = 915$

**LSNLALVKPEK pc2**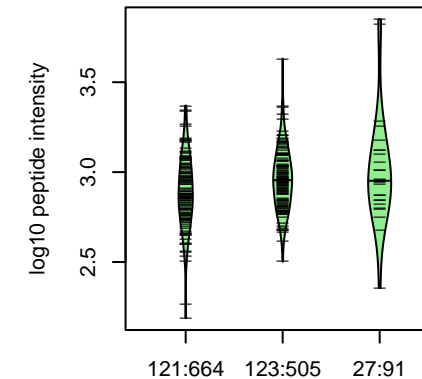

19:33083746:A:T\_T  
 $p = 0.02$ ,  $\beta = 0.212$ ,  $N = 271$

**O14737 NP2**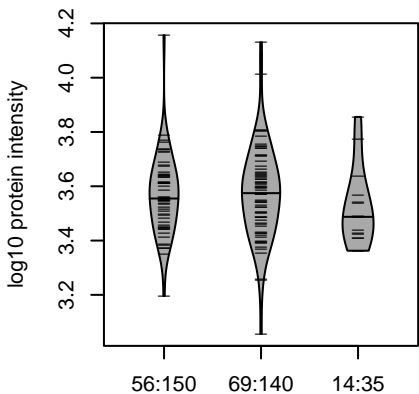

rs11673049  
 $p = 0.51$ ,  $\beta = -0.0853$ ,  $N = 139$

**AVENYLIQMAR pc2**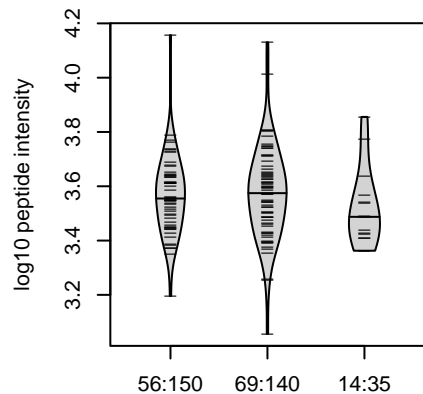

rs11673049  
 $p = 0.5$ ,  $\beta = -0.0879$ ,  $N = 139$

Locus: 191 (Sort: 218)

Status: Not replicated

80% power: No

SNP: 19:33083746:A:T

rsID: rs11673049

UniProtID: O14737

HGNC gene: PDCD5

Type: Cis-pQTL

### HLA-G [cis]

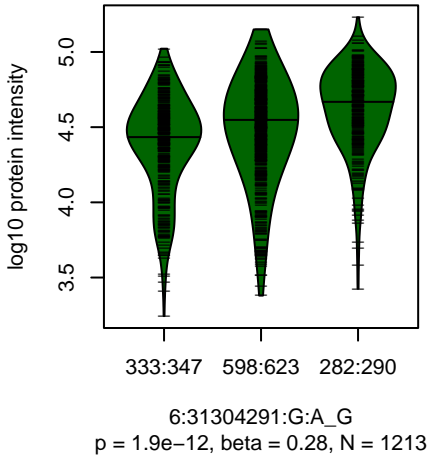

### DYLALNEDLR pc2

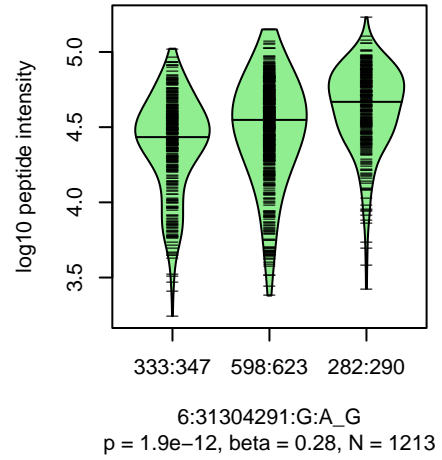

### Q5RJ85 NP1

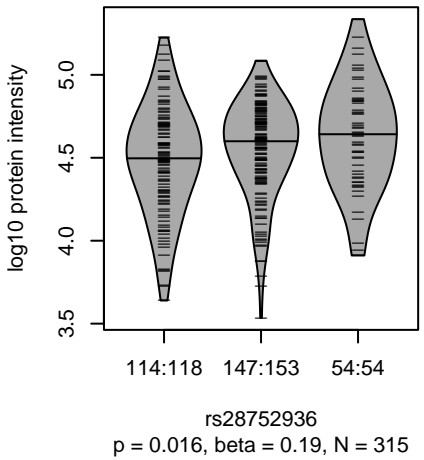

### DYLALNEDLR pc2

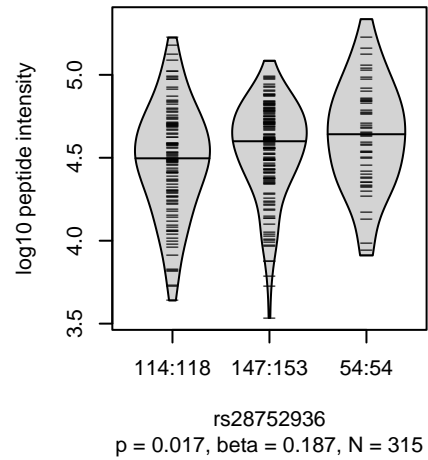

Locus: 192 (Sort: 219)  
Status: Not replicated  
80% power: No  
SNP: 6:31304291:G:A  
rsID: rs28752936  
UniProtID: Q5RJ85  
HGNC gene: HLA-G  
Type: Cis-pQTL

### WAAVVPSGEEQR pc2 rs707908;rs1736924 ALT

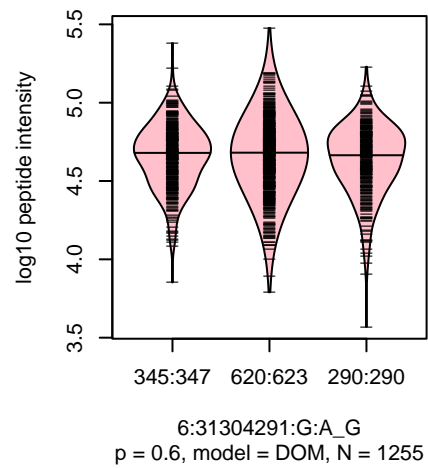

**SFTPD [cis]**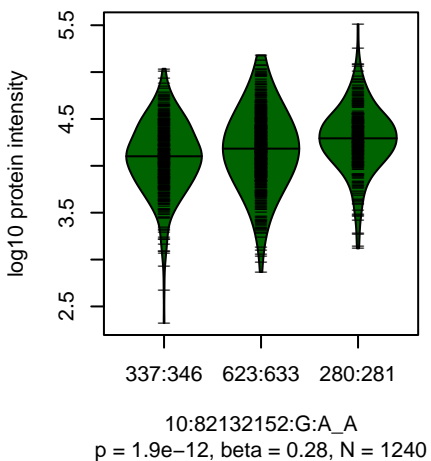**SAAENAALQQLVVAK pc2**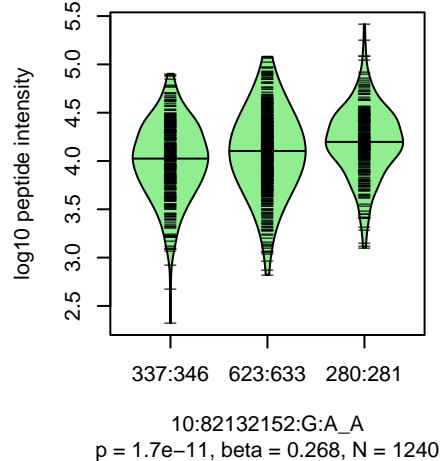**NEAFLSMTDSK pc2**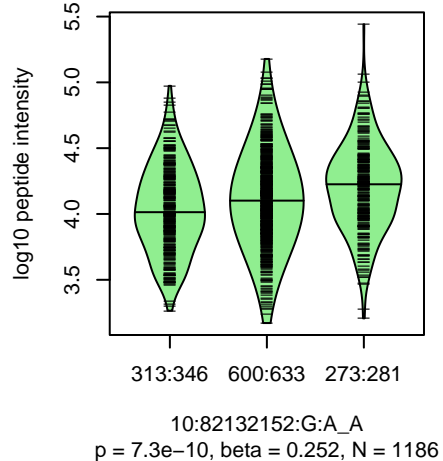**QGNIGPQGK pc2**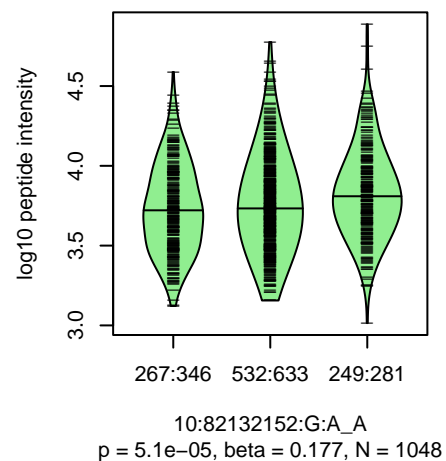**KVELFPNGQSVGEK pc3**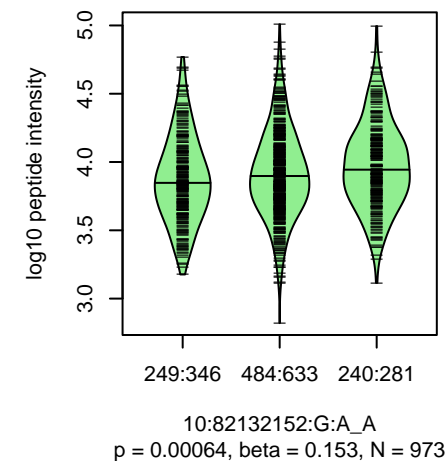**P35247 NP5**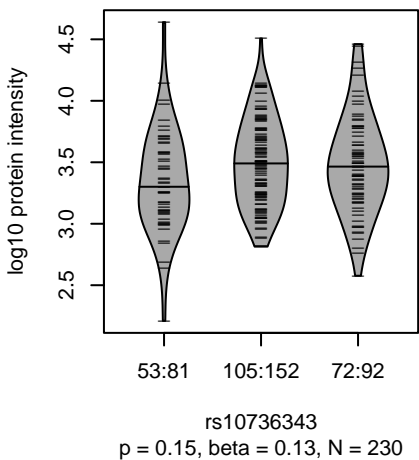**SAAENAALQQLVVAK pc2**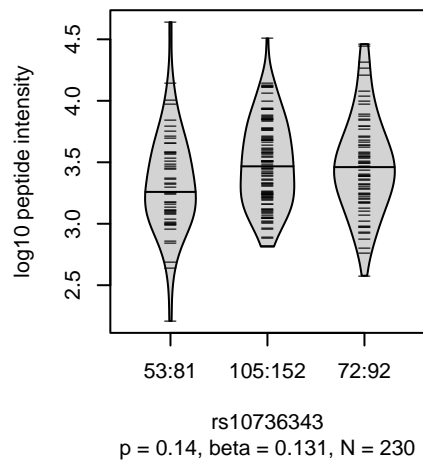**NEAFLSMTDSK pc2**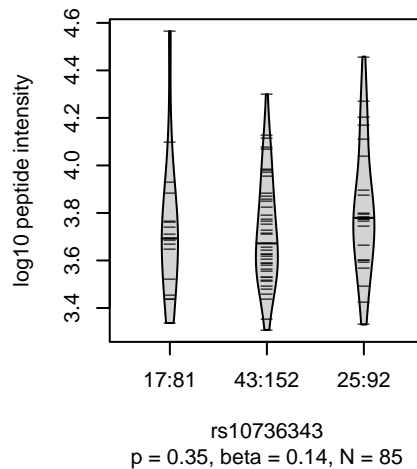**PFTEAQLLCTQAGGQLATPR pc3  
rs3088308 ALT**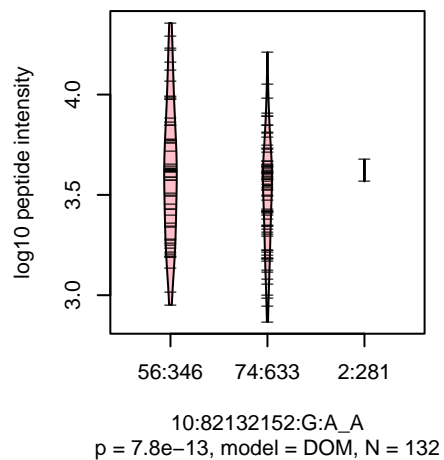**PFTEAQLLCTQAGGQLASPR pc3  
rs3088308 REF**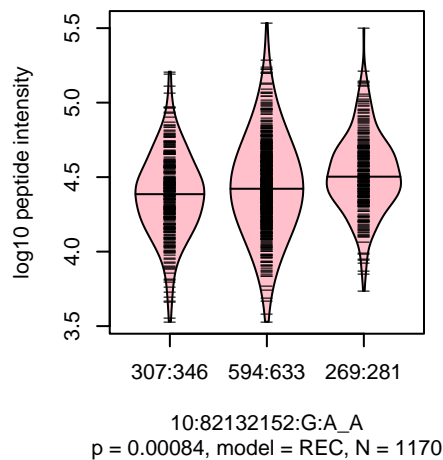

Locus: 193 (Sort: 220)  
Status: Not replicated  
80% power: No  
SNP: 10:82132152:G:A  
rsID: rs10736343  
UniProtID: P35247  
HGNC gene: SFTPD  
Type: Cis-pQTL

**FREM2 [cis]**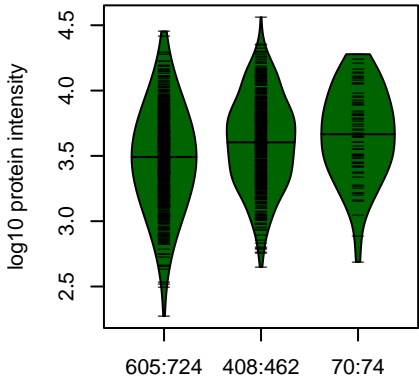

13:39275451:G:A\_A  
 $p = 2e-12$ ,  $\beta = 0.342$ ,  $N = 1083$

**VGILSGLGALPR pc2**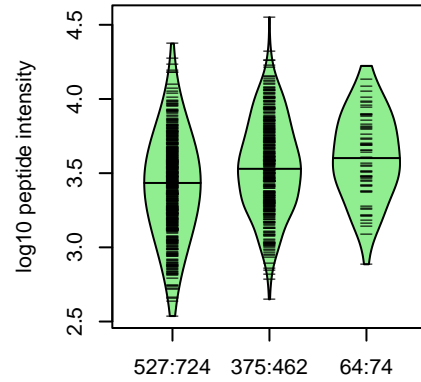

13:39275451:G:A\_A  
 $p = 1.6e-14$ ,  $\beta = 0.392$ ,  $N = 966$

**FIVTEAPQHGILLNLDK pc3**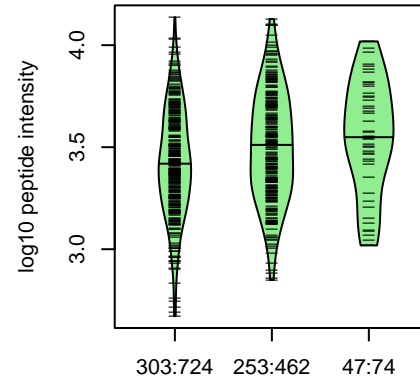

13:39275451:G:A\_A  
 $p = 3.5e-06$ ,  $\beta = 0.294$ ,  $N = 603$

**SLPLSSFTQR pc2**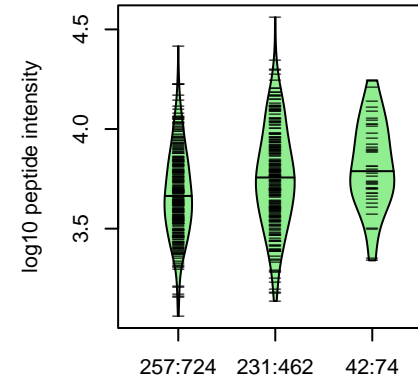

13:39275451:G:A\_A  
 $p = 3.8e-06$ ,  $\beta = 0.312$ ,  $N = 530$

**PMNTMAPVVTR pc2**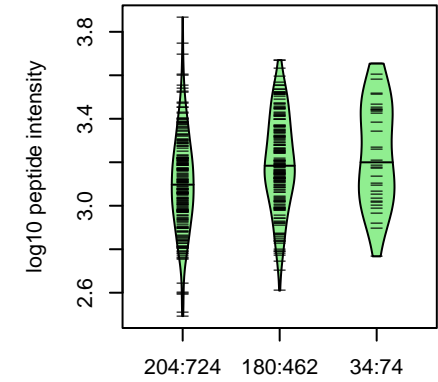

13:39275451:G:A\_A  
 $p = 5.8e-06$ ,  $\beta = 0.341$ ,  $N = 418$

**Q5SZK8 NP2**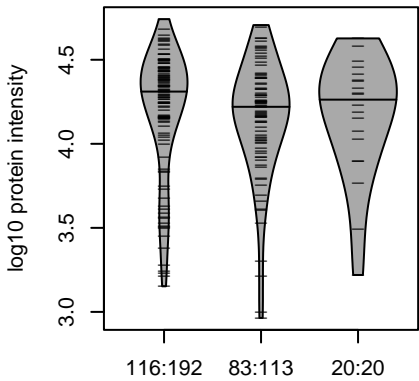

rs2496430  
 $p = 0.78$ ,  $\beta = -0.028$ ,  $N = 219$

**EVWLDPLHDLVLQVQPGDR pc3**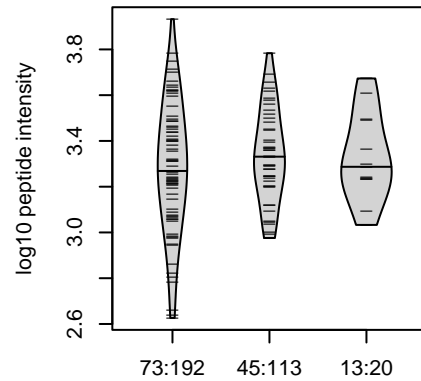

rs2496430  
 $p = 0.091$ ,  $\beta = 0.215$ ,  $N = 131$

**SLPLSSFTQR pc2**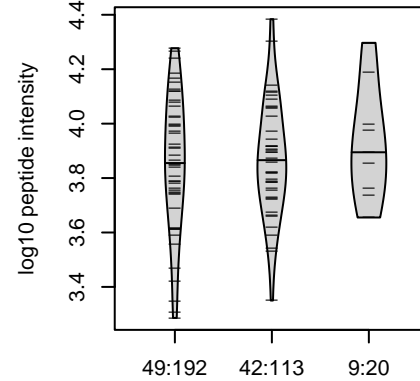

rs2496430  
 $p = 0.098$ ,  $\beta = 0.247$ ,  $N = 100$

**GYLGETSFISIGTR pc2**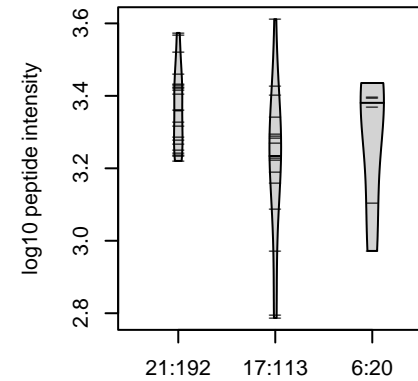

rs2496430  
 $p = 0.1$ ,  $\beta = -0.33$ ,  $N = 44$

**VGILSGLGALPR pc2**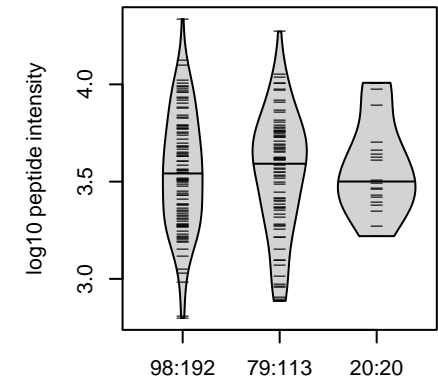

rs2496430  
 $p = 0.14$ ,  $\beta = 0.155$ ,  $N = 197$

Locus: 194 (Sort: 221)  
 Status: Not replicated  
 80% power: No  
 SNP: 13:39275451:G:A  
 rsID: rs2496430  
 UniProtID: Q5SZK8  
 HGNC gene: FREM2  
 Type: Cis-pQTL

**NLDFAPGVNMQPVR pc2  
rs9548505 REF**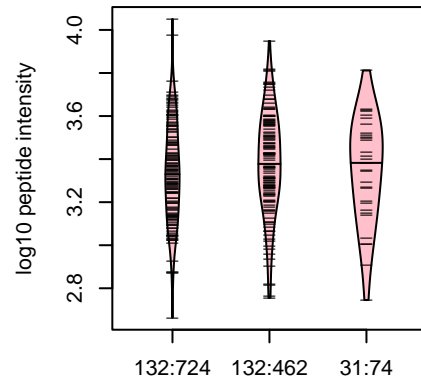

13:39275451:G:A\_A  
 $p = 5.8e-07$ , model = REC,  $N = 295$

**TLATGHLGFMITSK pc3  
rs1868463 REF**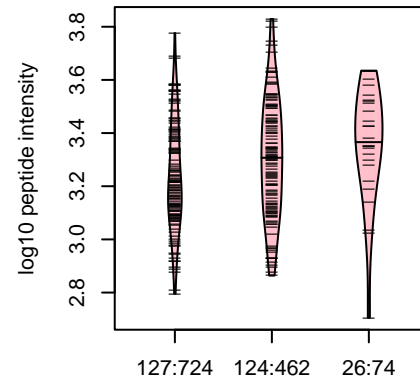

13:39275451:G:A\_A  
 $p = 1.4e-05$ , model = REC,  $N = 277$

**EGETQHVVEIEVIFDGVR pc3  
rs9548509 ALT**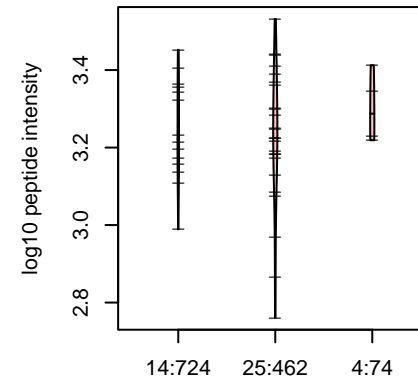

13:39275451:G:A\_A  
 $p = 9e-04$ , model = REC,  $N = 43$

**SERPINA10 [trans]**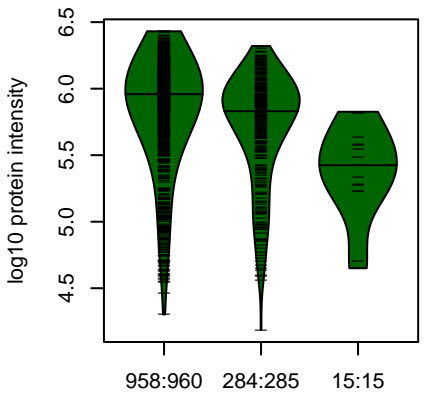

13:113915194:A:G\_G  
 $p = 2.1e-12$ ,  $\beta = -0.425$ ,  $N = 1257$

**YEMHELLR pc2**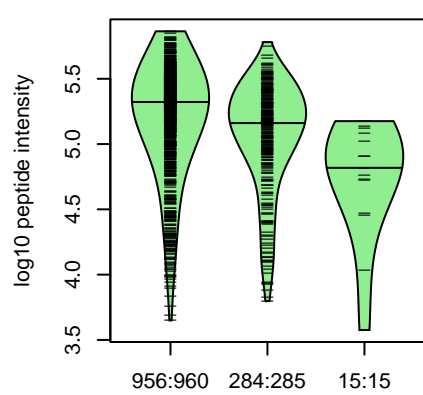

13:113915194:A:G\_G  
 $p = 4.4e-14$ ,  $\beta = -0.456$ ,  $N = 1255$

**VPMMYGAGK pc2**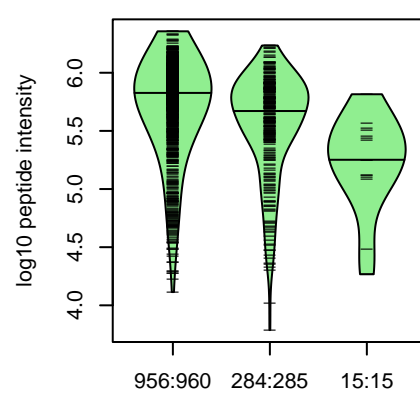

13:113915194:A:G\_G  
 $p = 2e-13$ ,  $\beta = -0.444$ ,  $N = 1255$

**RIFSPFADLSELSATGR pc3**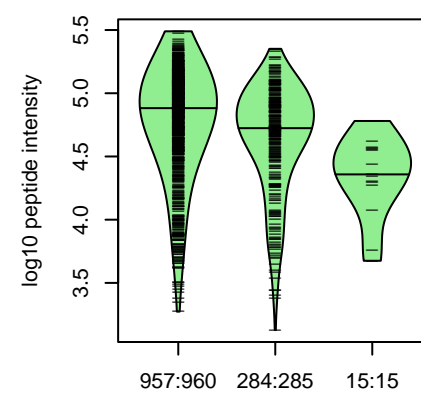

13:113915194:A:G\_G  
 $p = 1.4e-12$ ,  $\beta = -0.429$ ,  $N = 1256$

**LILVDYILFK pc2**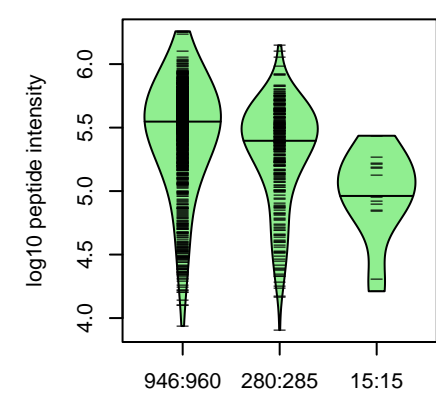

13:113915194:A:G\_G  
 $p = 1.8e-12$ ,  $\beta = -0.429$ ,  $N = 1241$

**G3V2W1 NP2**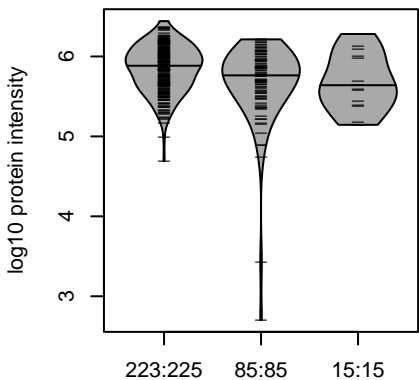

rs61967893  
 $p = 0.01$ ,  $\beta = -0.248$ ,  $N = 323$

**FASTFDK pc2**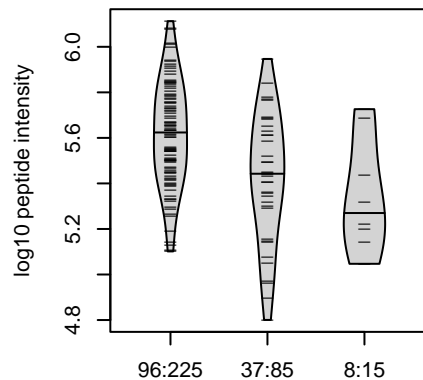

rs61967893  
 $p = 0.00048$ ,  $\beta = -0.478$ ,  $N = 141$

**ETSNFGFSLLRK pc3**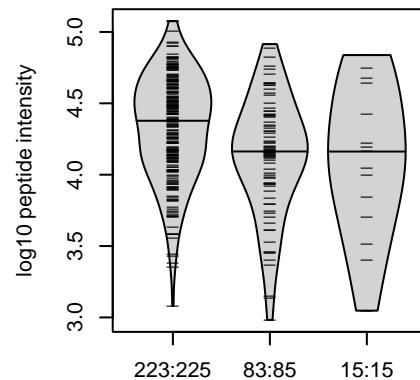

rs61967893  
 $p = 0.0017$ ,  $\beta = -0.303$ ,  $N = 321$

**NMEVFFPK pc2**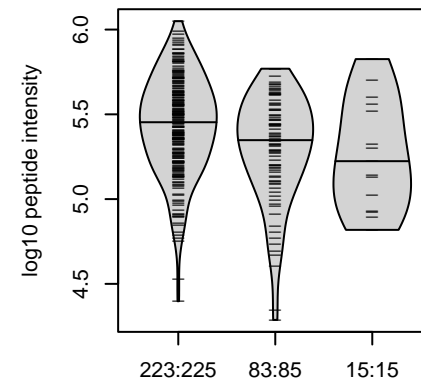

rs61967893  
 $p = 0.0022$ ,  $\beta = -0.296$ ,  $N = 321$

**LILVDYILFK pc2**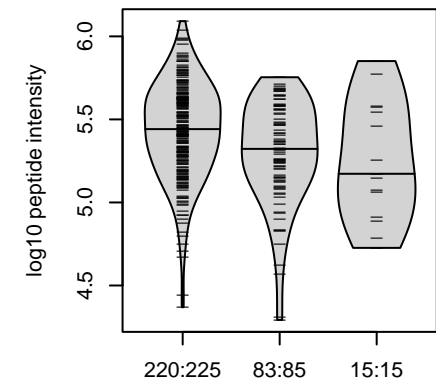

rs61967893  
 $p = 0.0038$ ,  $\beta = -0.28$ ,  $N = 318$

**NLELGLTQGSFAFIHK pc3  
rs2232700 REF**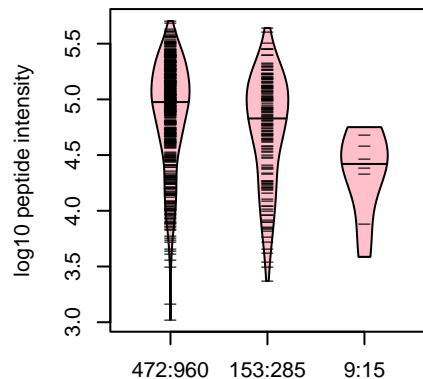

13:113915194:A:G\_G  
 $p = 0.15$ ,  $\text{model} = \text{REC}$ ,  $N = 634$

**ETLSRNLELGLTQGSFAFIHK pc4  
rs2232700 REF**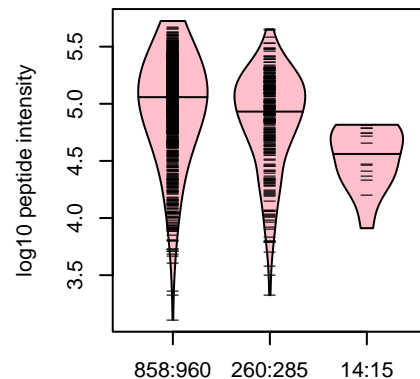

13:113915194:A:G\_G  
 $p = 0.38$ ,  $\text{model} = \text{REC}$ ,  $N = 1132$

**NLELGLSQQGSFAFIHK pc3  
rs2232700 ALT**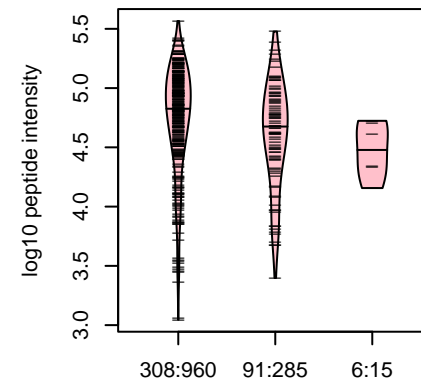

13:113915194:A:G\_G  
 $p = 0.58$ ,  $\text{model} = \text{DOM}$ ,  $N = 405$

Locus: 195 (Sort: 222)  
 Status: Not replicated  
 80% power: No  
 SNP: 13:113915194:A:G  
 rsID: rs61967893  
 UniProtID: G3V2W1  
 HGNC gene: SERPINA10  
 Type: Trans-pQTL

**MMRN2 [cis]**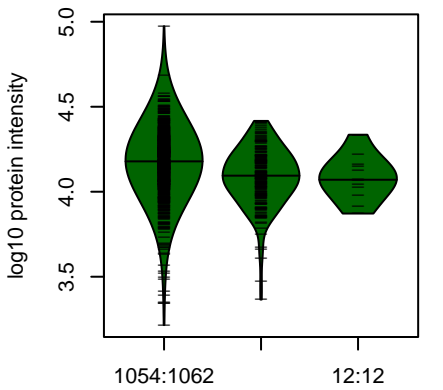

10:88696622:C:G\_G  
 $p = 2.3e-12$ ,  $\beta = -0.492$ ,  $N = 1250$

**VWFELTQGSITK pc2**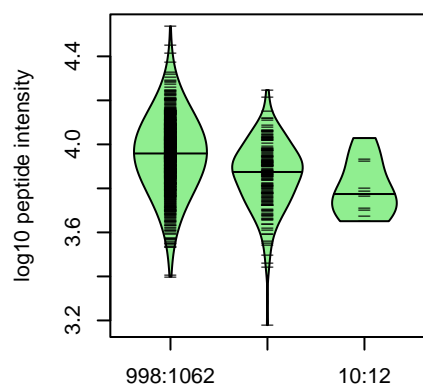

10:88696622:C:G\_G  
 $p = 3.9e-17$ ,  $\beta = -0.618$ ,  $N = 1177$

**SLSGTAFGGFLMFK pc2**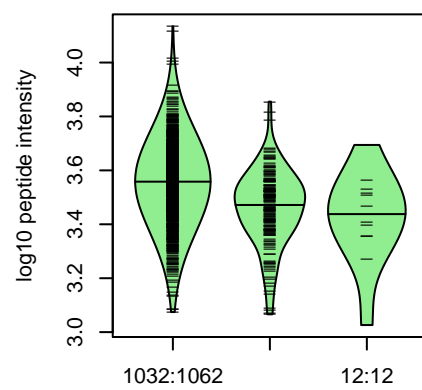

10:88696622:C:G\_G  
 $p = 1e-16$ ,  $\beta = -0.597$ ,  $N = 1213$

**EAEPLVDIR pc2**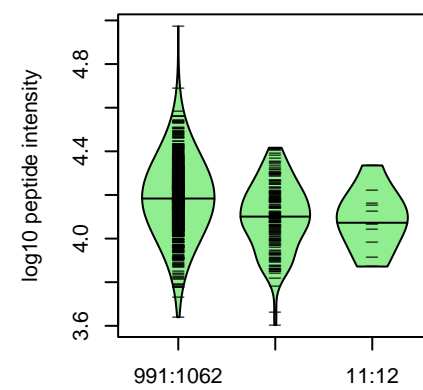

10:88696622:C:G\_G  
 $p = 4.2e-13$ ,  $\beta = -0.531$ ,  $N = 1169$

**SQVQALDDEVGALK pc2**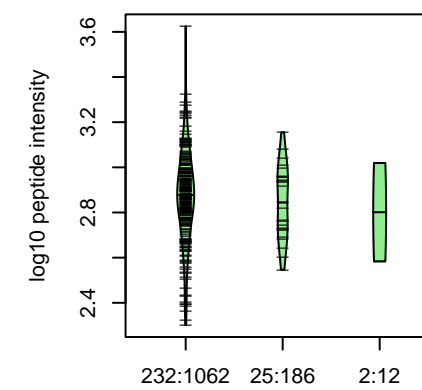

10:88696622:C:G\_G  
 $p = 0.27$ ,  $\beta = -0.199$ ,  $N = 259$

**Q9H8L6 NP2**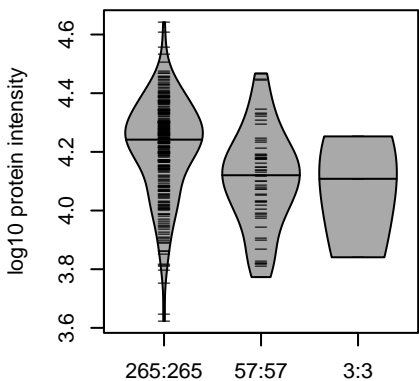

rs34587013  
 $p = 1e-04$ ,  $\beta = -0.51$ ,  $N = 325$

**EAEPLVDIR pc2**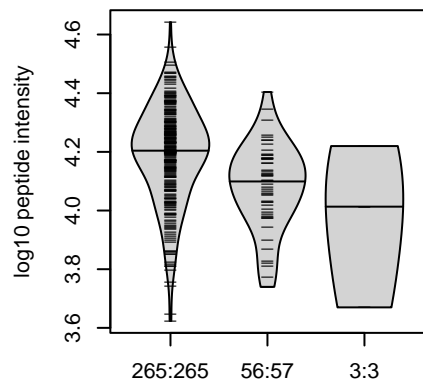

rs34587013  
 $p = 9.5e-06$ ,  $\beta = -0.575$ ,  $N = 324$

**VWFELTQGSITK pc2**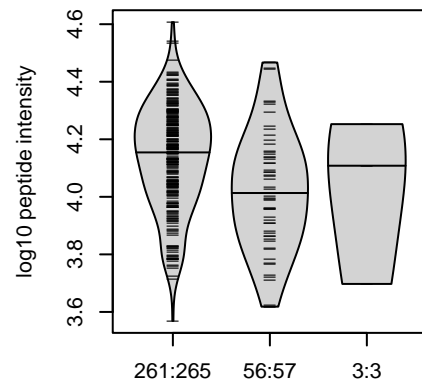

rs34587013  
 $p = 0.00032$ ,  $\beta = -0.471$ ,  $N = 320$

**SLSGTAFGGFLMFK pc2**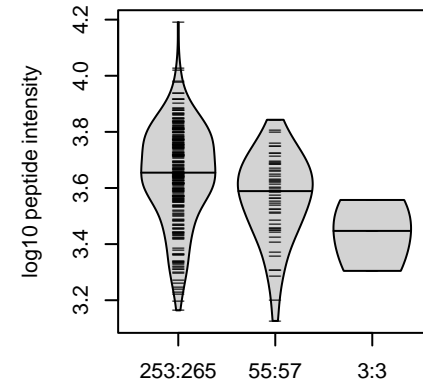

rs34587013  
 $p = 0.00061$ ,  $\beta = -0.452$ ,  $N = 311$

**VLTSLAWR pc2**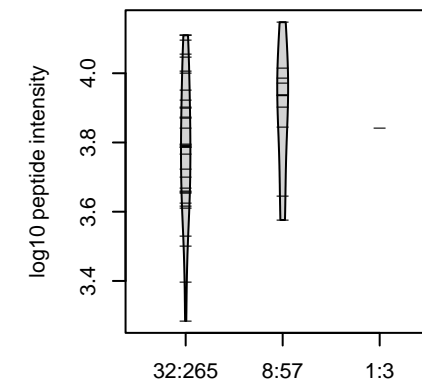

rs34587013  
 $p = 0.35$ ,  $\beta = 0.286$ ,  $N = 41$

**AEAEDTGKDPVGR pc3  
rs3750823 REF**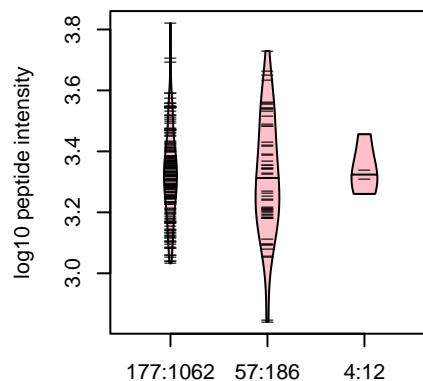

10:88696622:C:G\_G  
 $p = 1.1e-05$ ,  $\text{model} = \text{REC}$ ,  $N = 238$

Locus: 196 (Sort: 223)  
 Status: Replicated  
 80% power: No  
 SNP: 10:88696622:C:G  
 rsID: rs34587013  
 UniProtID: Q9H8L6  
 HGNC gene: MMRN2  
 Type: Cis-pQTL

**TINAGL1 [trans]**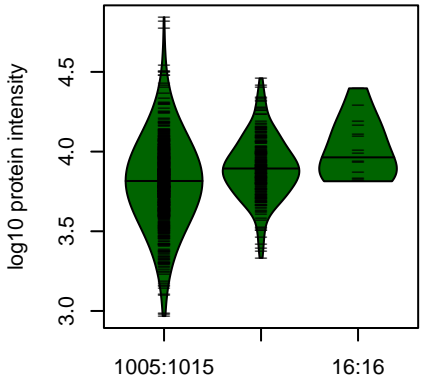

3:186445052:T:G\_G  
 $p = 2.7e-12$ ,  $\beta = 0.448$ ,  $N = 1247$

**ITGWGEETLPDGR pc2**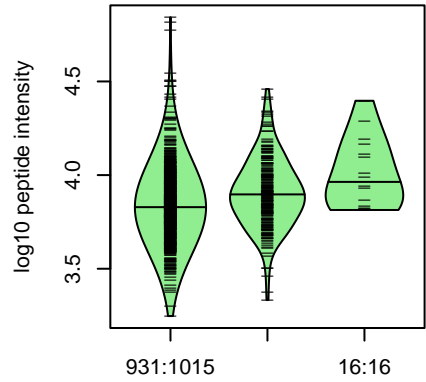

3:186445052:T:G\_G  
 $p = 2.2e-09$ ,  $\beta = 0.39$ ,  $N = 1168$

**VGMEDMGHH pc2**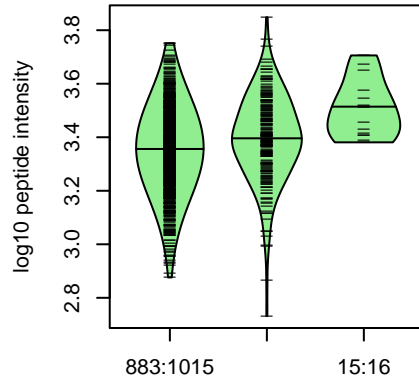

3:186445052:T:G\_G  
 $p = 5.6e-07$ ,  $\beta = 0.338$ ,  $N = 1104$

**GVNECDIESFVLGVWGR pc3**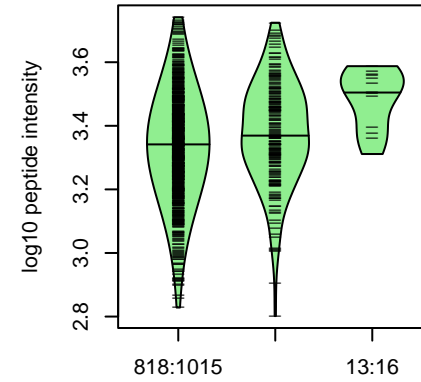

3:186445052:T:G\_G  
 $p = 4.1e-06$ ,  $\beta = 0.321$ ,  $N = 1030$

**YWTAANSWGPAWGER pc2**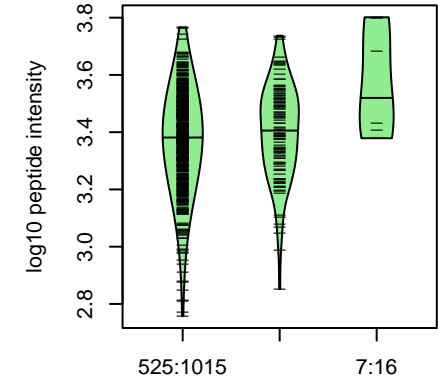

3:186445052:T:G\_G  
 $p = 0.0014$ ,  $\beta = 0.294$ ,  $N = 645$

**Q9GZM7 NP2**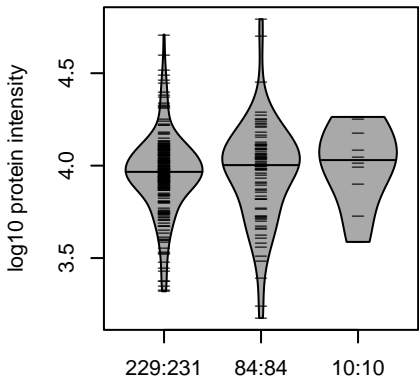

rs2304456  
 $p = 0.18$ ,  $\beta = 0.139$ ,  $N = 323$

**VGMEDMGHH pc2**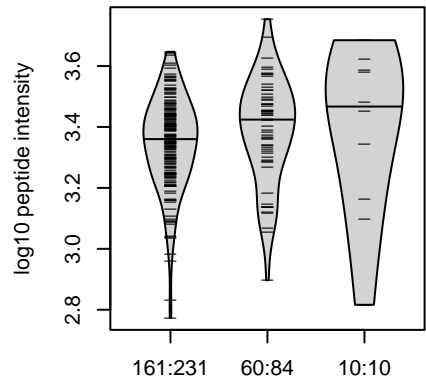

rs2304456  
 $p = 0.02$ ,  $\beta = 0.268$ ,  $N = 231$

**ITGWGEETLPDGR pc2**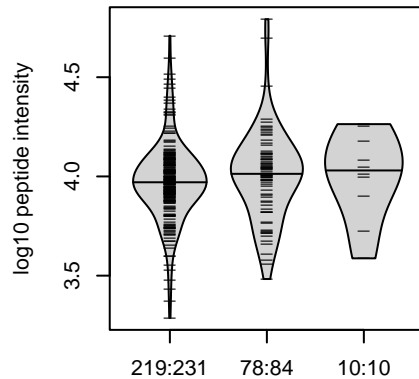

rs2304456  
 $p = 0.1$ ,  $\beta = 0.173$ ,  $N = 307$

**YWTAANSWGPAWGER pc2**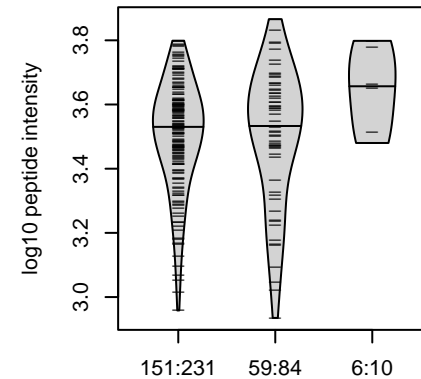

rs2304456  
 $p = 0.17$ ,  $\beta = 0.173$ ,  $N = 216$

**GVNECDIESFVLGVWGR pc3**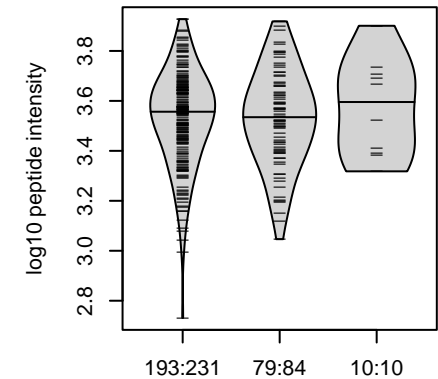

rs2304456  
 $p = 0.41$ ,  $\beta = 0.0879$ ,  $N = 282$

Locus: 197 (Sort: 224)

Status: Not replicated

80% power: No

SNP: 3:186445052:T:G

rsID: rs2304456

UniProtID: Q9GZM7

HGNC gene: TINAGL1

Type: Trans-pQTL

**KNG1 [cis]**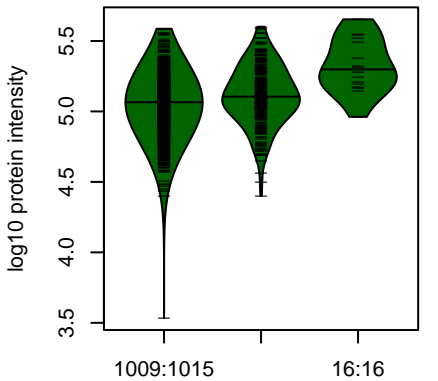

3:186449122:A:G\_G  
 $p = 2.3e-11$ ,  $\beta = 0.427$ ,  $N = 1254$

**TWQDCEYKDKAAK pc3**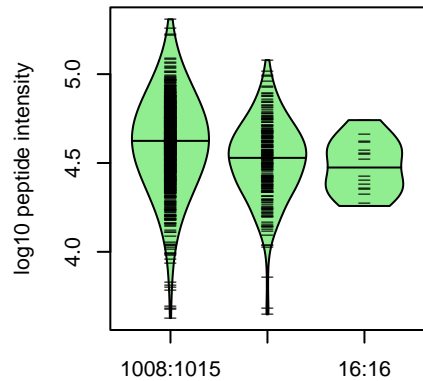

3:186449122:A:G\_G  
 $p = 1.7e-10$ ,  $\beta = -0.408$ ,  $N = 1253$

**AGAEPASEREVS pc2**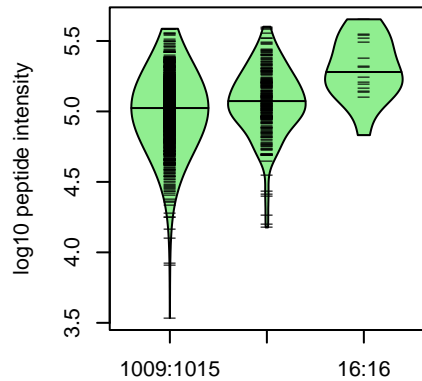

3:186449122:A:G\_G  
 $p = 1.6e-09$ ,  $\beta = 0.386$ ,  $N = 1254$

**AGAEPASER pc2**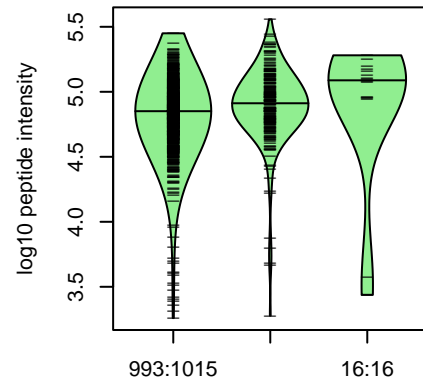

3:186449122:A:G\_G  
 $p = 2.4e-09$ ,  $\beta = 0.385$ ,  $N = 1234$

**LNAENNATFYFK pc2**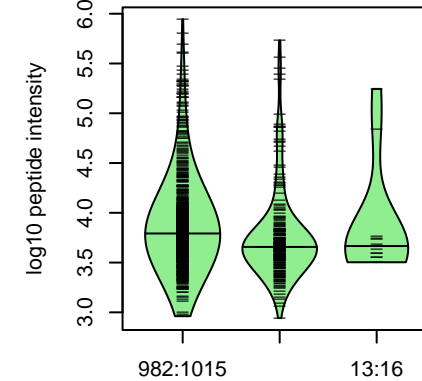

3:186449122:A:G\_G  
 $p = 4.3e-08$ ,  $\beta = -0.364$ ,  $N = 1215$

**P01042 NP3**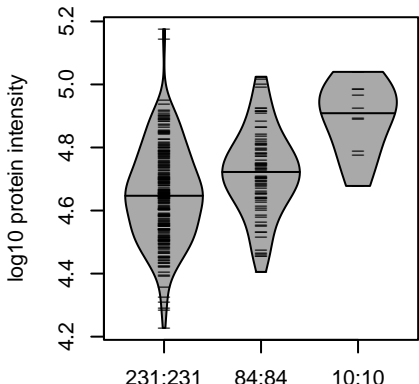

rs5030044  
 $p = 7.7e-09$ ,  $\beta = 0.576$ ,  $N = 325$

**AGAEPASER pc2**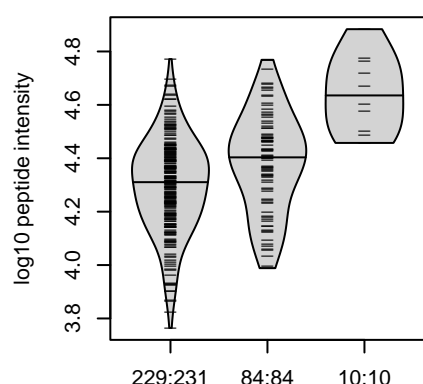

rs5030044  
 $p = 3.9e-10$ ,  $\beta = 0.631$ ,  $N = 323$

**EETTSHLR pc2**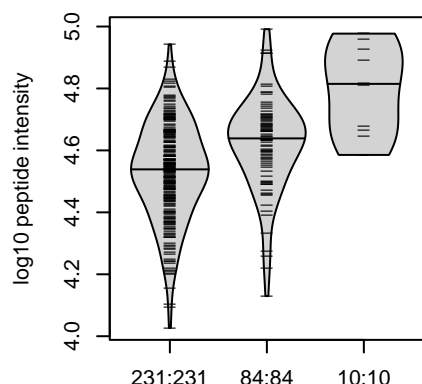

rs5030044  
 $p = 1.5e-09$ ,  $\beta = 0.61$ ,  $N = 325$

**TVGSDFYFSFKYEIK pc3**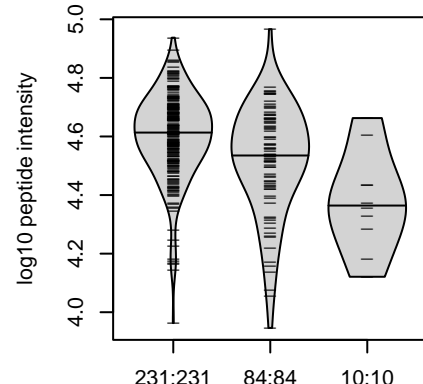

rs5030044  
 $p = 5.3e-07$ ,  $\beta = -0.51$ ,  $N = 325$

**AVDAALKK pc2**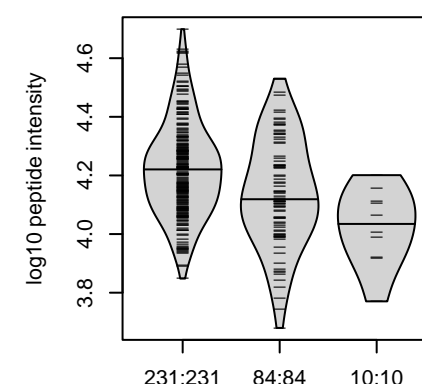

rs5030044  
 $p = 5.4e-07$ ,  $\beta = -0.51$ ,  $N = 325$

**HGIQYFNNNTQHSSLFTLNEVK pc4  
rs1656922 ALT**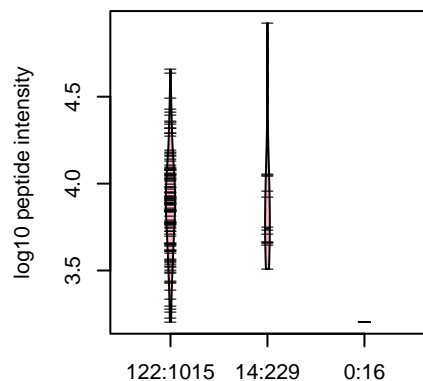

3:186449122:A:G\_G  
 $p = 0.0039$ ,  $\text{model} = \text{REC}$ ,  $N = 136$

**HGIQYFNNNTQHSSLFMLNEVK pc4  
rs1656922 REF**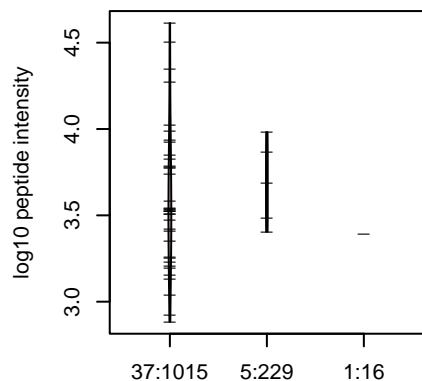

3:186449122:A:G\_G  
 $p = 0.43$ ,  $\text{model} = \text{DOM}$ ,  $N = 43$

Locus: 197 (Sort: 225)  
 Status: Replicated  
 80% power: No  
 SNP: 3:186449122:A:G  
 rsID: rs5030044  
 UniProtID: P01042  
 HGNC gene: KNG1  
 Type: Cis-pQTL



**CDH15 [cis]**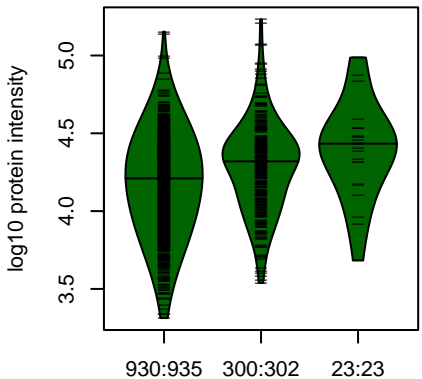

16:89199108:G:A\_A  
 $p = 2.8e-12$ ,  $\beta = 0.4$ ,  $N = 1253$

**VLEGAVPGTYVTR pc2**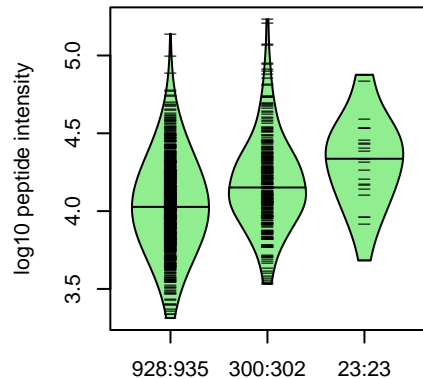

16:89199108:G:A\_A  
 $p = 1.4e-21$ ,  $\beta = 0.542$ ,  $N = 1251$

**VFLNAMLDR pc2**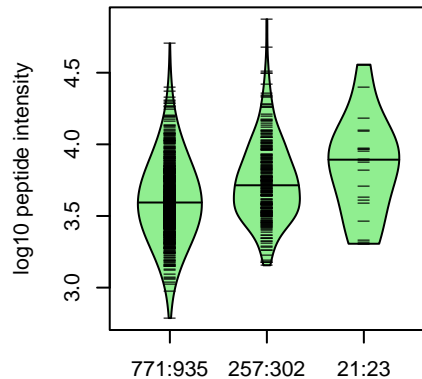

16:89199108:G:A\_A  
 $p = 9.1e-16$ ,  $\beta = 0.493$ ,  $N = 1049$

**ALDYESCEHYELK pc3**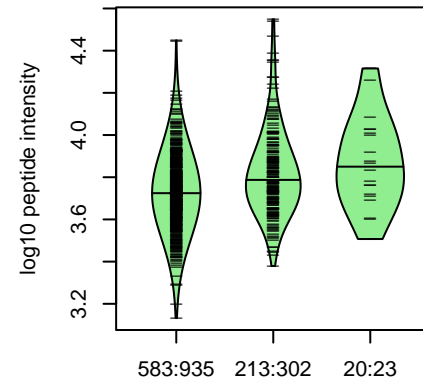

16:89199108:G:A\_A  
 $p = 9e-12$ ,  $\beta = 0.457$ ,  $N = 816$

**IQTQHVLSASPFLK pc3**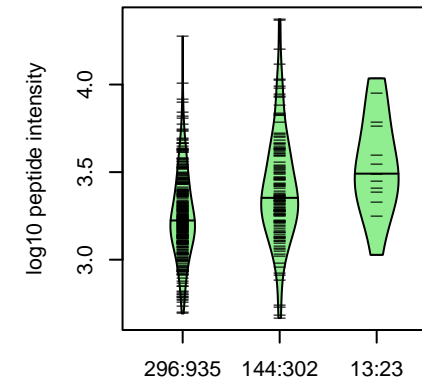

16:89199108:G:A\_A  
 $p = 2.4e-11$ ,  $\beta = 0.562$ ,  $N = 453$

**P55291 NP2**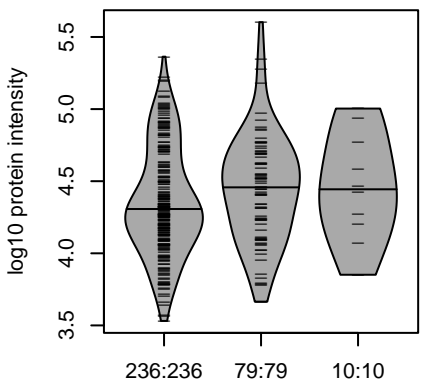

rs11646135  
 $p = 0.1$ ,  $\beta = 0.172$ ,  $N = 325$

**AIVLAQDDASQPR pc2**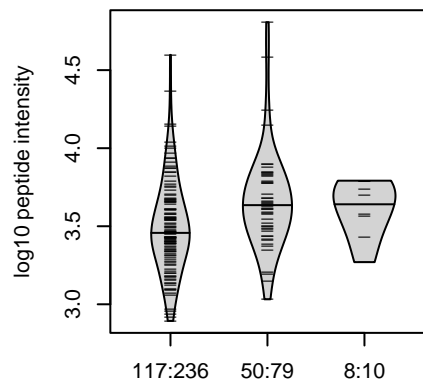

rs11646135  
 $p = 0.00034$ ,  $\beta = 0.457$ ,  $N = 175$

**IQTQHVLSASPFLK pc3**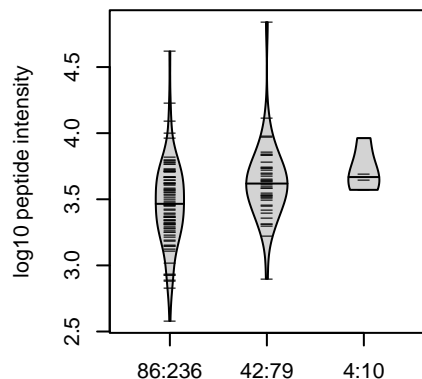

rs11646135  
 $p = 0.00039$ ,  $\beta = 0.542$ ,  $N = 132$

**VFLNAMLDR pc2**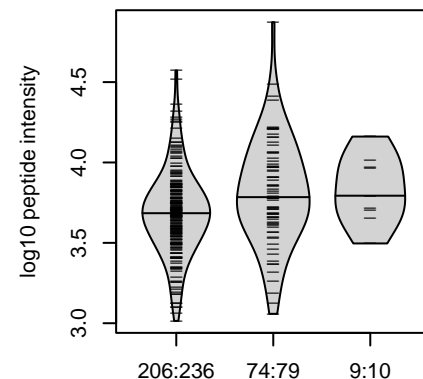

rs11646135  
 $p = 0.00072$ ,  $\beta = 0.368$ ,  $N = 289$

**VLEGAVPGTYVTR pc2**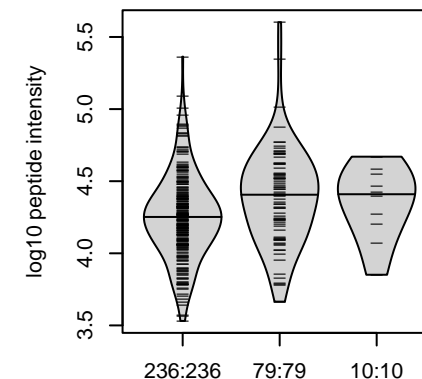

rs11646135  
 $p = 0.0011$ ,  $\beta = 0.341$ ,  $N = 325$

Locus: 198 (Sort: 226)

Status: Not replicated

80% power: No

SNP: 16:89199108:G:A

rsID: rs11646135

UniProtID: P55291

HGNC gene: CDH15

Type: Cis-pQTL

**IGKV1-17 [cis]**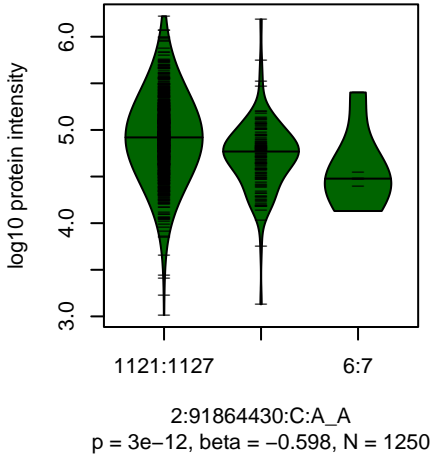**NDLGWYQQK pc2**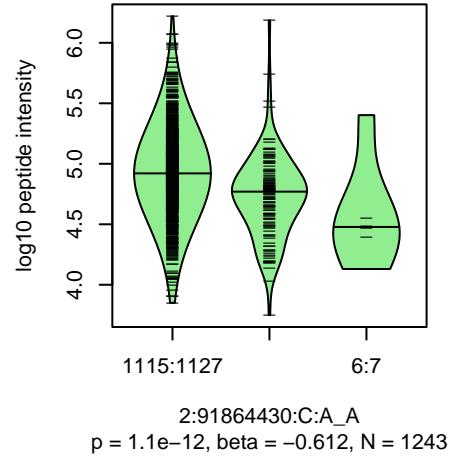**LIYAASSLQSGVPSR pc2**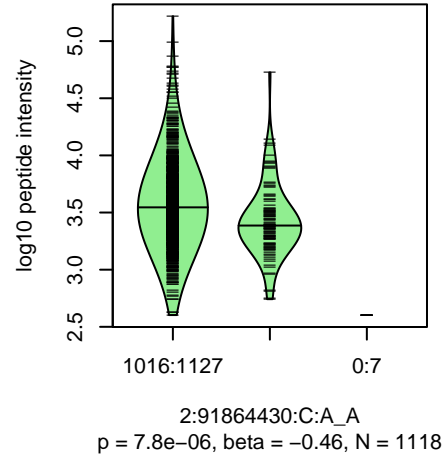**P01599 NP3**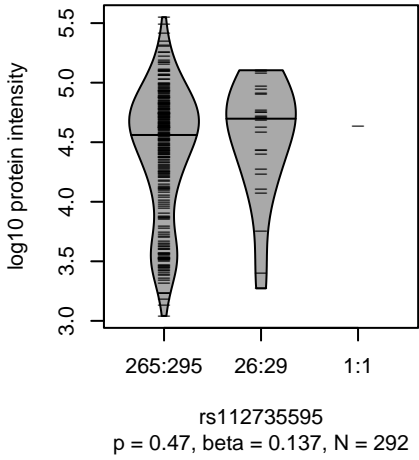**LIYAASSLQSGVPSR pc2**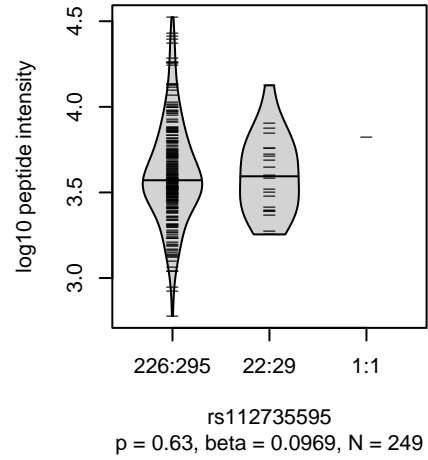**NDLGWYQQK pc2**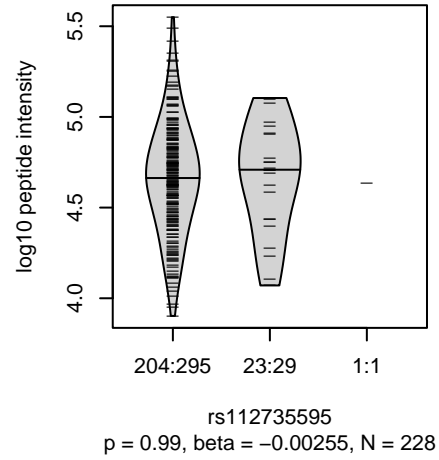

Locus: 199 (Sort: 227)

Status: Not replicated

80% power: No

SNP: 2:91864430:C:A

rsID: rs112735595

UniProtID: P01599

HGNC gene: IGKV1-17

Type: Cis-pQTL

**TCN2 [cis]**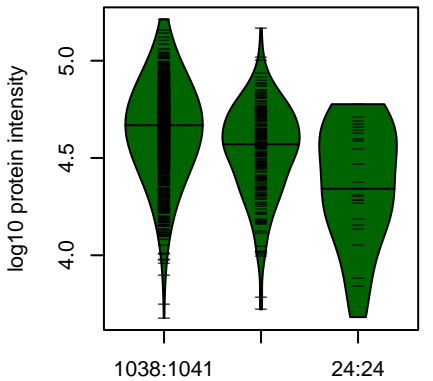

22:31023893:C:T\_T  
 $p = 4e-12$ ,  $\beta = -0.439$ ,  $N = 1256$

**LSSLQAGTK pc2**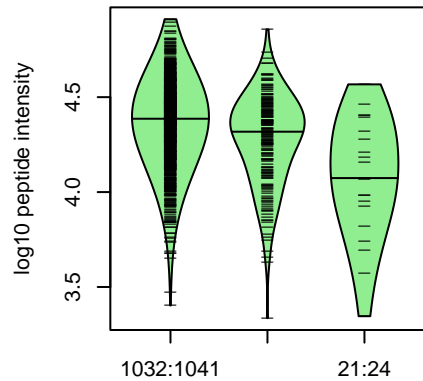

22:31023893:C:T\_T  
 $p = 1.7e-12$ ,  $\beta = -0.46$ ,  $N = 1240$

**TYIDLIFPDCLAPR pc2**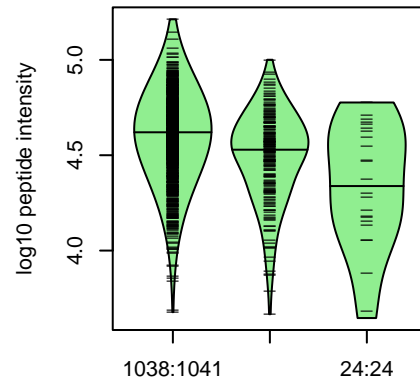

22:31023893:C:T\_T  
 $p = 1.7e-11$ ,  $\beta = -0.426$ ,  $N = 1256$

**TVREEILK pc2**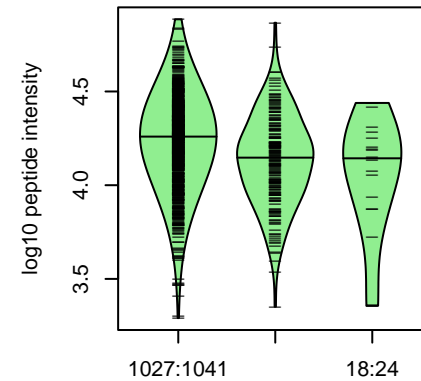

22:31023893:C:T\_T  
 $p = 5.6e-09$ ,  $\beta = -0.387$ ,  $N = 1237$

**DGETIELR pc2**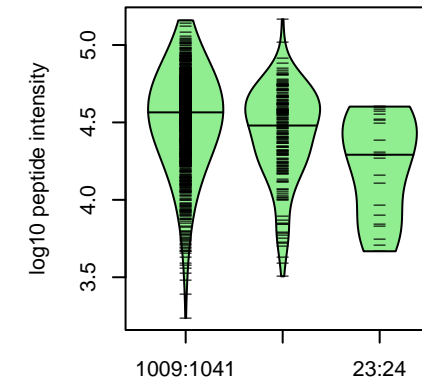

22:31023893:C:T\_T  
 $p = 2e-08$ ,  $\beta = -0.362$ ,  $N = 1220$

**F8WE86 NP1**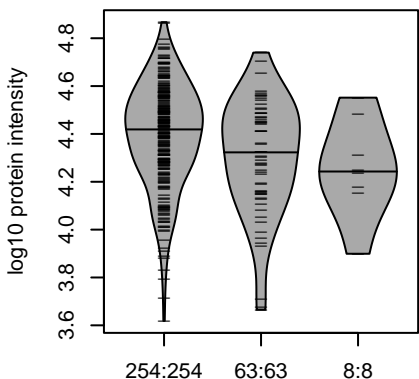

rs8135379  
 $p = 0.0022$ ,  $\beta = -0.344$ ,  $N = 325$

**TYIDLIFPDCLAPR pc2**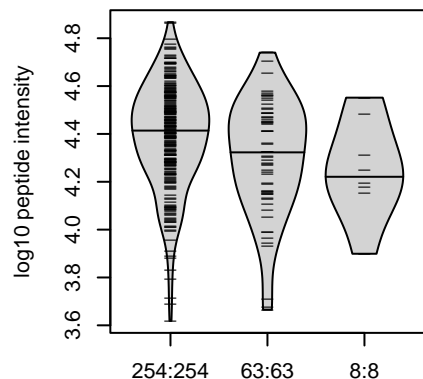

rs8135379  
 $p = 0.0022$ ,  $\beta = -0.346$ ,  $N = 325$

**EDLYLHSLK pc2**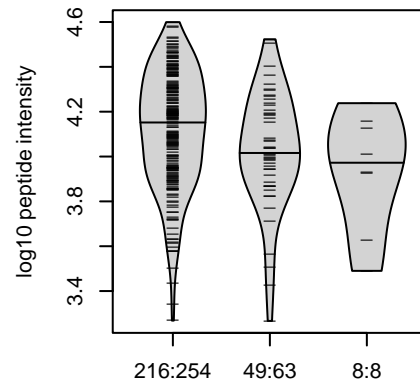

rs8135379  
 $p = 0.0075$ ,  $\beta = -0.324$ ,  $N = 273$

**WFLEDEK pc2**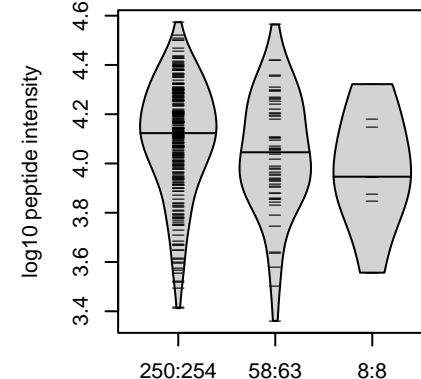

rs8135379  
 $p = 0.043$ ,  $\beta = -0.234$ ,  $N = 316$

**.YAVEPFHQGHHSVDTAAMAGLAFTCL**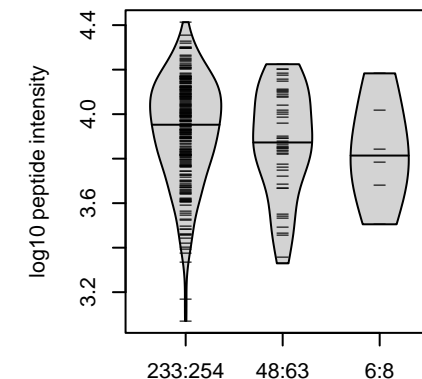

rs8135379  
 $p = 0.071$ ,  $\beta = -0.23$ ,  $N = 287$

**GAELGTACK pc2  
rs1801198 REF**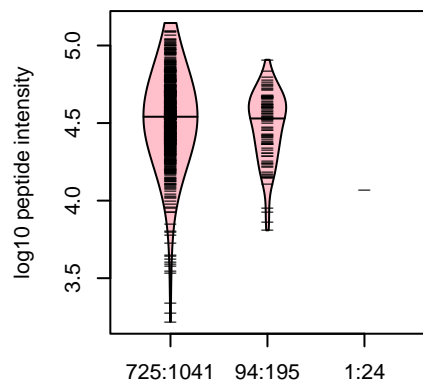

22:31023893:C:T\_T  
 $p = 5.6e-13$ ,  $\text{model} = \text{REC}$ ,  $N = 820$

**QSIFVLGASTVEDVLK pc2  
rs9621049 ALT**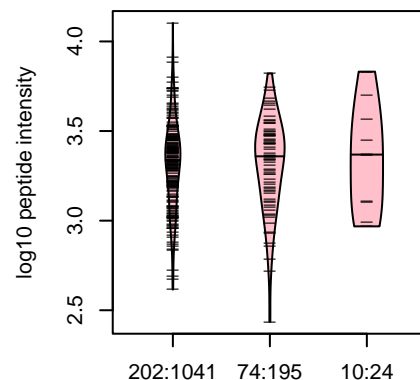

22:31023893:C:T\_T  
 $p = 8.2e-09$ ,  $\text{model} = \text{REC}$ ,  $N = 286$

**QSISVLGASTVEDVLKK pc3  
rs9621049 REF**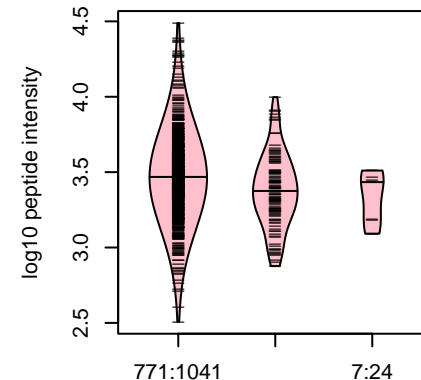

22:31023893:C:T\_T  
 $p = 2e-08$ ,  $\text{model} = \text{REC}$ ,  $N = 890$

**QSIFVLGASTVEDVLKK pc3  
rs9621049 ALT**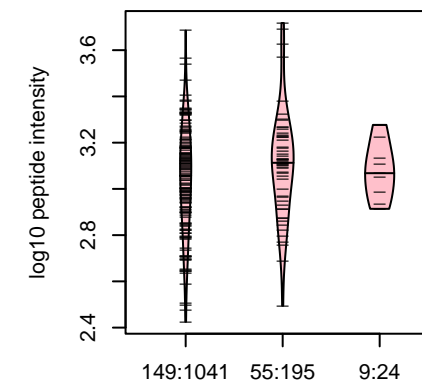

22:31023893:C:T\_T  
 $p = 4.8e-07$ ,  $\text{model} = \text{REC}$ ,  $N = 213$

Locus: 200 (Sort: 228)  
 Status: Not replicated  
 80% power: No  
 SNP: 22:31023893:C:T  
 rsID: rs8135379  
 UniProtID: F8WE86  
 HGNC gene: TCN2  
 Type: Cis-pQTL

**FCN3 [cis]**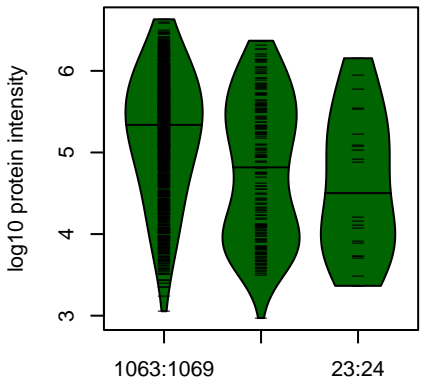

1:27709858:G:T\_T  
 $p = 4.1e-12$ ,  $\beta = -0.459$ ,  $N = 1252$

**YAVSEAAAHK pc2**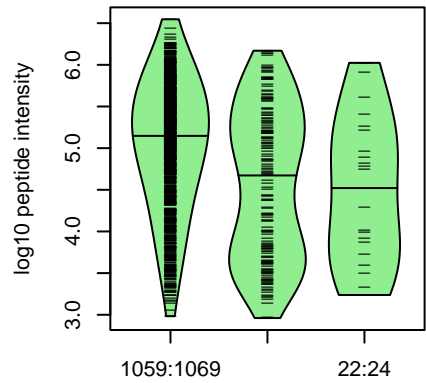

1:27709858:G:T\_T  
 $p = 6e-12$ ,  $\beta = -0.46$ ,  $N = 1246$

**LLGEVDHYQLALGK pc3**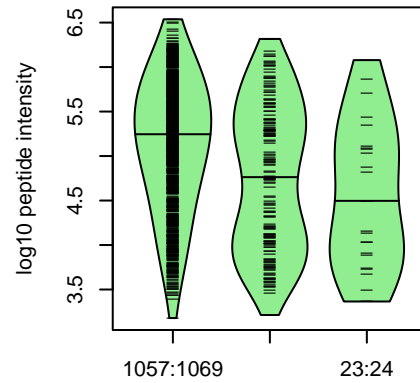

1:27709858:G:T\_T  
 $p = 6.4e-11$ ,  $\beta = -0.436$ ,  $N = 1242$

**YGIDWASGR pc2**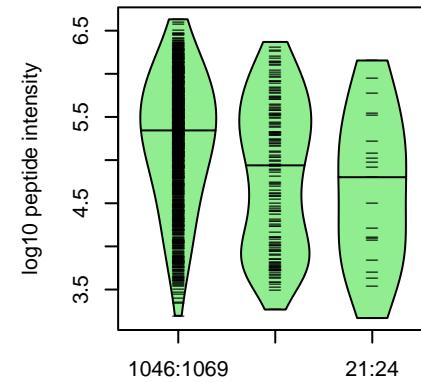

1:27709858:G:T\_T  
 $p = 8e-10$ ,  $\beta = -0.422$ ,  $N = 1222$

**ALPVFCMDMTEGGGWLVFQR pc3**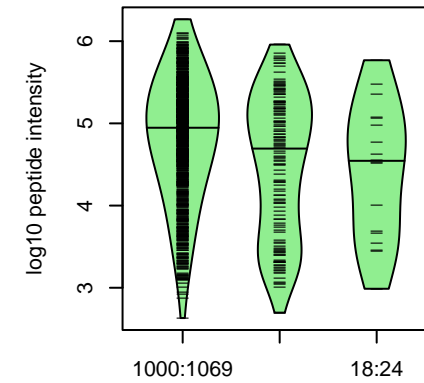

1:27709858:G:T\_T  
 $p = 1.2e-06$ ,  $\beta = -0.354$ ,  $N = 1157$

**O75636 NP3**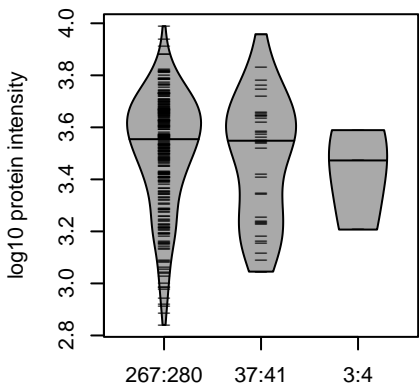

rs734725  
 $p = 0.27$ ,  $\beta = -0.167$ ,  $N = 307$

**YAVSEAAAHK pc2**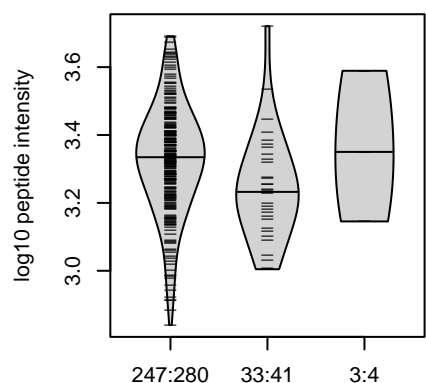

rs734725  
 $p = 0.039$ ,  $\beta = -0.322$ ,  $N = 283$

**YGIDWASGR pc2**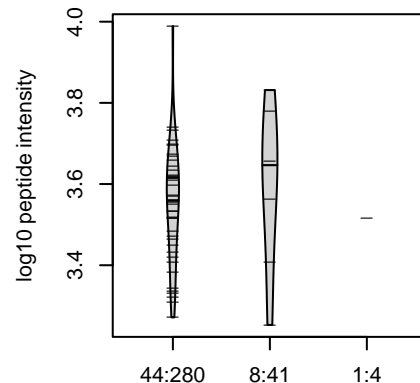

rs734725  
 $p = 0.6$ ,  $\beta = 0.16$ ,  $N = 53$

**ALPVFCMDMTEGGGWLVFQR pc3**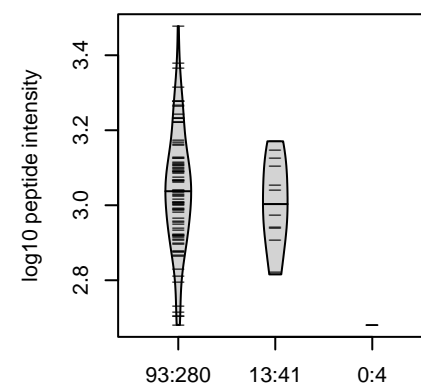

rs734725  
 $p = 0.67$ ,  $\beta = -0.123$ ,  $N = 106$

**LLGEVDHYQLALGK pc3**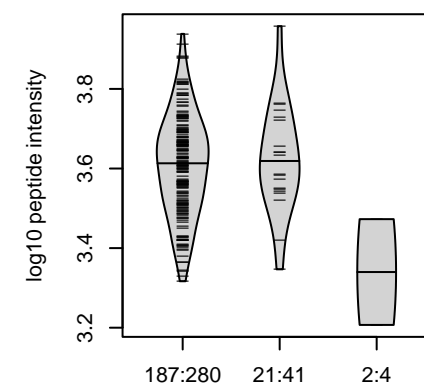

rs734725  
 $p = 0.71$ ,  $\beta = -0.0714$ ,  $N = 210$

Locus: 201 (Sort: 229)  
 Status: Not replicated  
 80% power: No  
 SNP: 1:27709858:G:T  
 rsID: rs734725  
 UniProtID: O75636  
 HGNC gene: FCN3  
 Type: Cis-pQTL

**MST1 [cis]**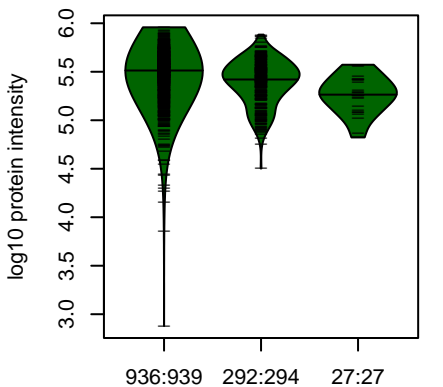

3:48695834:T:C\_C  
 $p = 4.2e-12$ ,  $\beta = -0.392$ ,  $N = 1255$

**VVGHPGNSPWTVSLR pc3**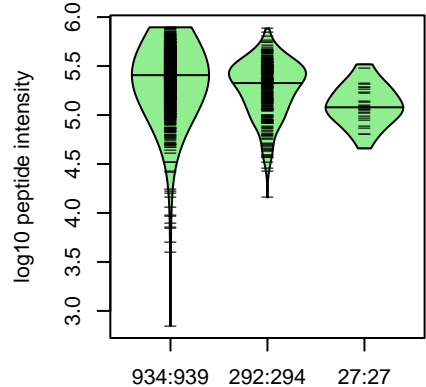

3:48695834:T:C\_C  
 $p = 2.5e-12$ ,  $\beta = -0.396$ ,  $N = 1253$

**MVCGPSGSQLVLLK pc2**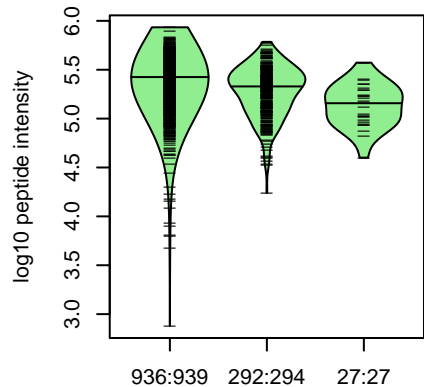

3:48695834:T:C\_C  
 $p = 4.6e-12$ ,  $\beta = -0.391$ ,  $N = 1255$

**CEIAGWGETK pc2**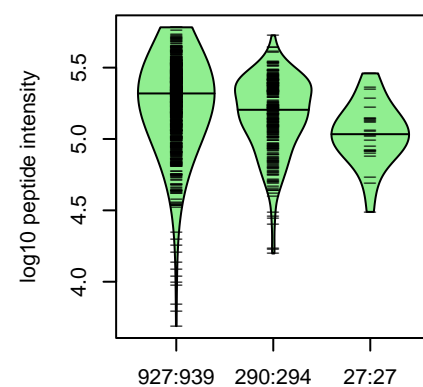

3:48695834:T:C\_C  
 $p = 5.4e-12$ ,  $\beta = -0.391$ ,  $N = 1244$

**QQQHFCGGSLVK pc2**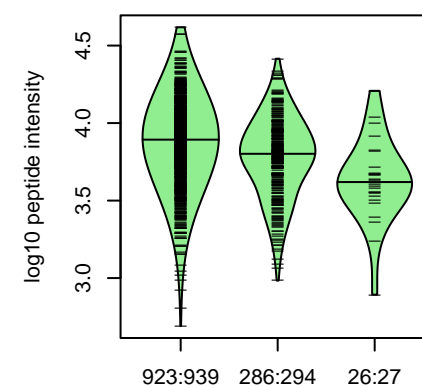

3:48695834:T:C\_C  
 $p = 6e-11$ ,  $\beta = -0.375$ ,  $N = 1235$

**G3XAK1 NP3**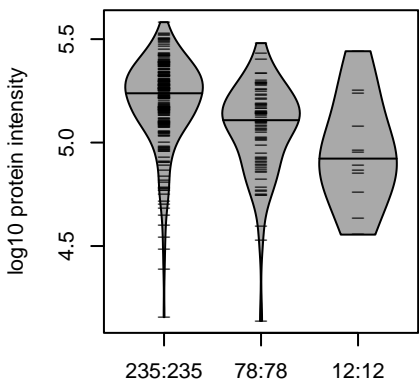

rs73078357  
 $p = 1.1e-08$ ,  $\beta = -0.557$ ,  $N = 325$

**CEIAGWGETK pc3**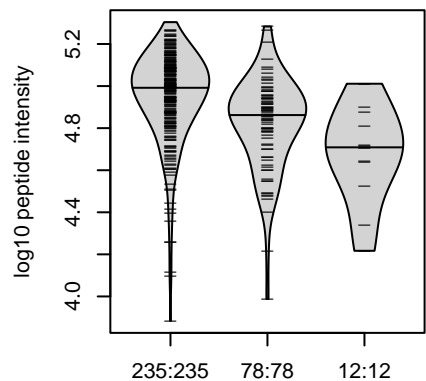

rs73078357  
 $p = 5.2e-09$ ,  $\beta = -0.58$ ,  $N = 325$

**VVGHPGNSPWTVSLR pc3**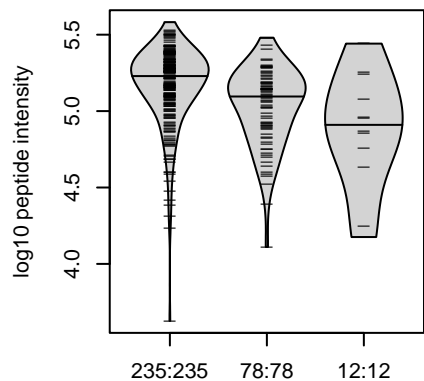

rs73078357  
 $p = 5.1e-08$ ,  $\beta = -0.543$ ,  $N = 325$

**MVCGPSGSQLVLLK pc2**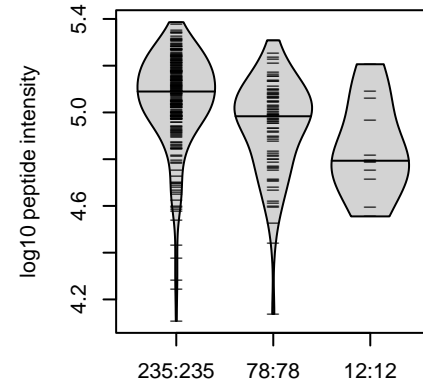

rs73078357  
 $p = 7.4e-08$ ,  $\beta = -0.537$ ,  $N = 325$

**CGPLMDCR pc2**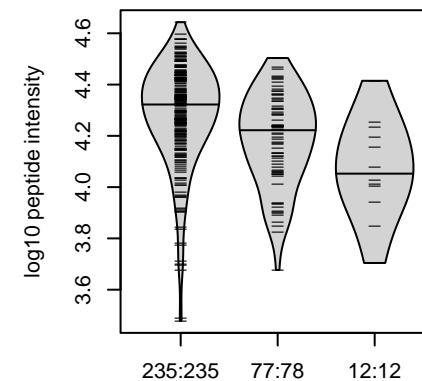

rs73078357  
 $p = 1.4e-07$ ,  $\beta = -0.526$ ,  $N = 324$

Locus: 202 (Sort: 230)  
 Status: Replicated  
 80% power: No  
 SNP: 3:48695834:T:C  
 rsID: rs73078357  
 UniProtID: G3XAK1  
 HGNC gene: MST1  
 Type: Cis-pQTL

**SCWPAVFTR pc2  
rs3197999 ALT**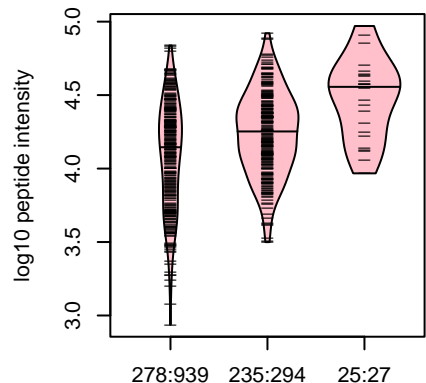

3:48695834:T:C\_C  
 $p = 1e-59$ ,  $\text{model} = \text{REC}$ ,  $N = 538$

**WPAVFTR pc2  
rs3197999 REF**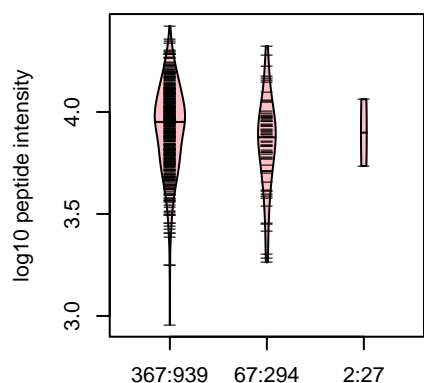

3:48695834:T:C\_C  
 $p = 6.2e-09$ ,  $\text{model} = \text{REC}$ ,  $N = 436$

**CFB [cis]**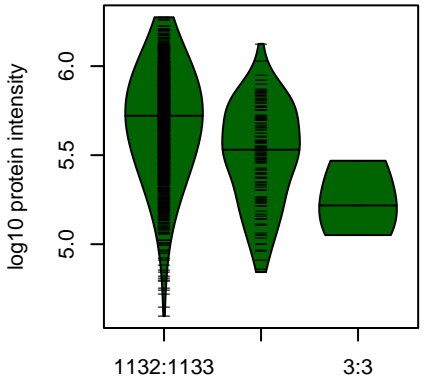

6:31878108:C:T\_T  
 $p = 4.2e-12$ ,  $\beta = -0.618$ ,  $N = 1259$

**STGSWSTLK pc2**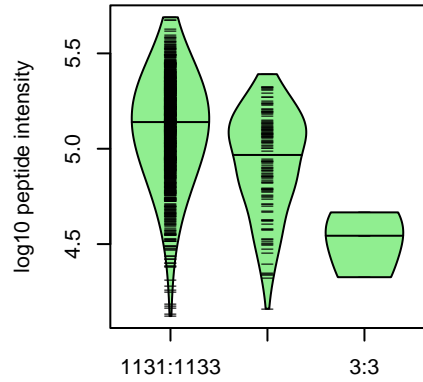

6:31878108:C:T\_T  
 $p = 2.6e-14$ ,  $\beta = -0.677$ ,  $N = 1258$

**YGLVTYATYPK pc2**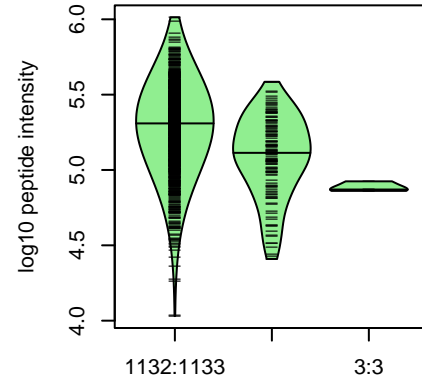

6:31878108:C:T\_T  
 $p = 3e-14$ ,  $\beta = -0.676$ ,  $N = 1259$

**LEDSVTYHCSR pc3**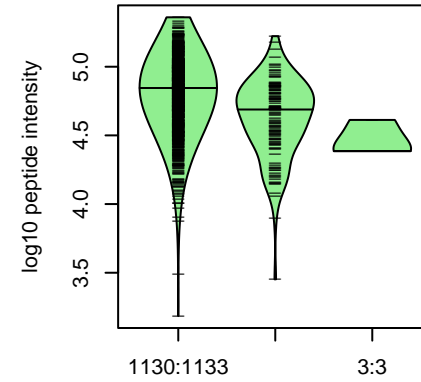

6:31878108:C:T\_T  
 $p = 3.1e-13$ ,  $\beta = -0.649$ ,  $N = 1257$

**QLNEINYEDHK pc3**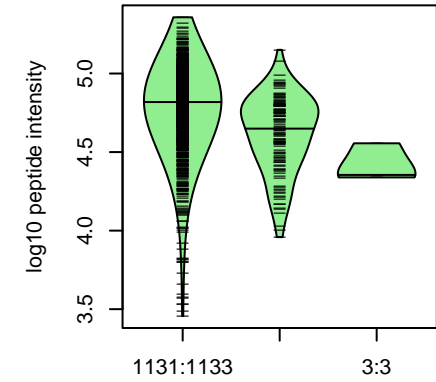

6:31878108:C:T\_T  
 $p = 7.8e-13$ ,  $\beta = -0.638$ ,  $N = 1258$

**B4E1Z4 NP4**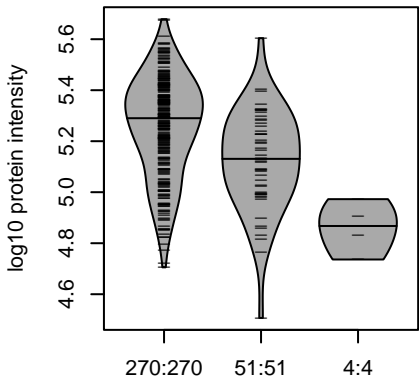

rs6457457  
 $p = 7.1e-07$ ,  $\beta = -0.647$ ,  $N = 325$

**QLNEINYEDHK pc3**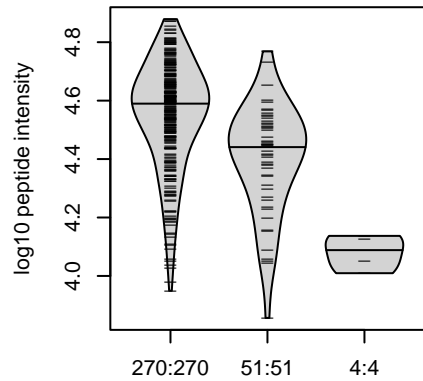

rs6457457  
 $p = 2.8e-09$ ,  $\beta = -0.762$ ,  $N = 325$

**LPPTTCQQQK pc2**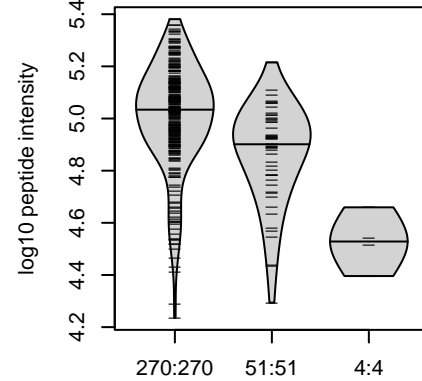

rs6457457  
 $p = 1.7e-08$ ,  $\beta = -0.725$ ,  $N = 325$

**VSEADSSNADWVTK pc2**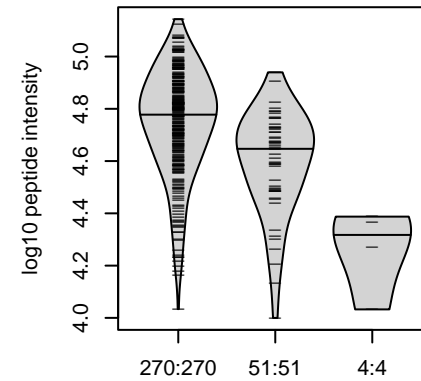

rs6457457  
 $p = 2.1e-08$ ,  $\beta = -0.721$ ,  $N = 325$

**YGLVTYATYPK pc2**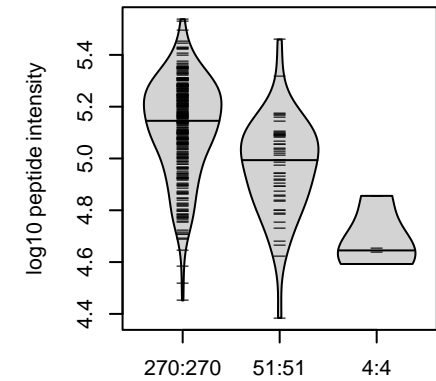

rs6457457  
 $p = 2.3e-08$ ,  $\beta = -0.719$ ,  $N = 325$

**PQSCSLEGVEIK pc2  
rs12614;rs641153 REF**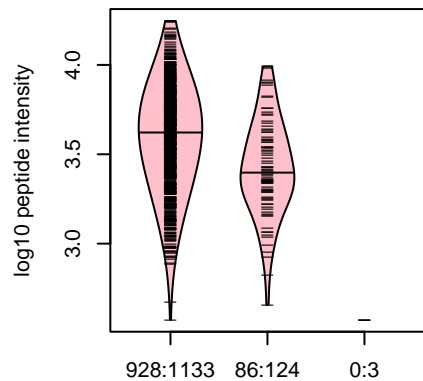

6:31878108:C:T\_T  
 $p = 0.00034$ ,  $\text{model} = \text{REC}$ ,  $N = 1014$

Locus: 203 (Sort: 231)  
 Status: Replicated  
 80% power: No  
 SNP: 6:31878108:C:T  
 rsID: rs6457457  
 UniProtID: B4E1Z4  
 HGNC gene: CFB  
 Type: Cis-pQTL

**PRCP [cis]**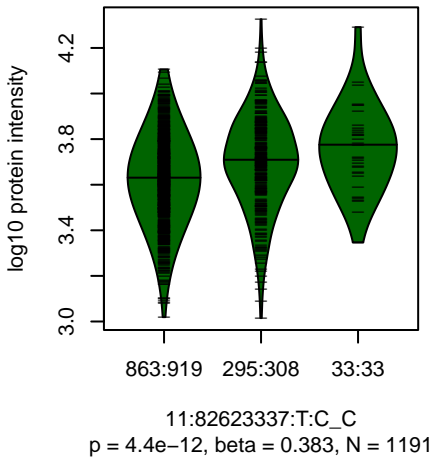**NALDPMSVLLAR pc2**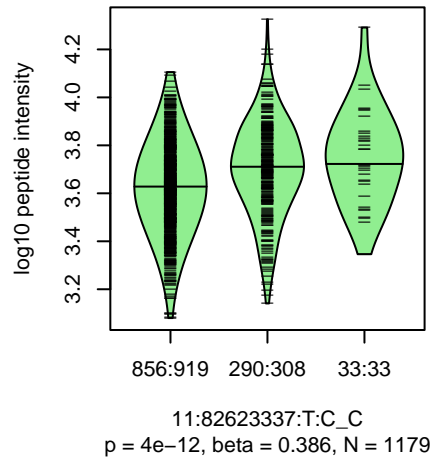**YYGESLPFGDNSFK pc2**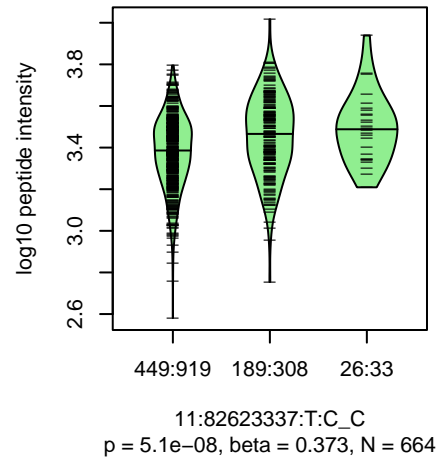**DITDTLVAVTISEGAHHLDLR pc3**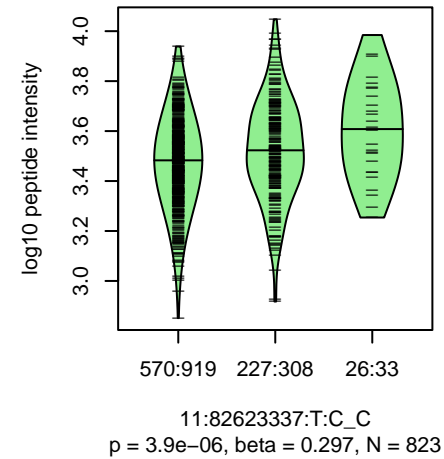**HLNFLTSEQALADFAELIK pc3**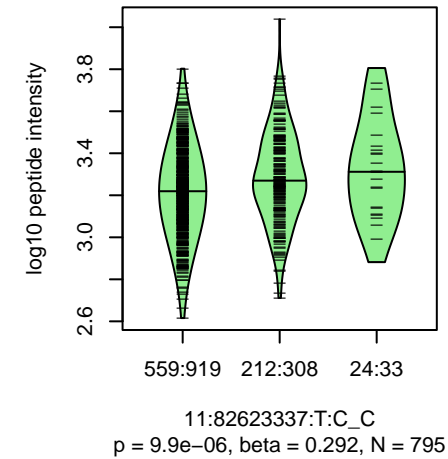**P42785 NP5**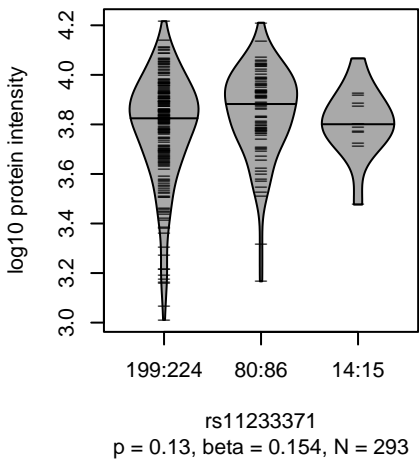**YYGESLPFGDNSFK pc2**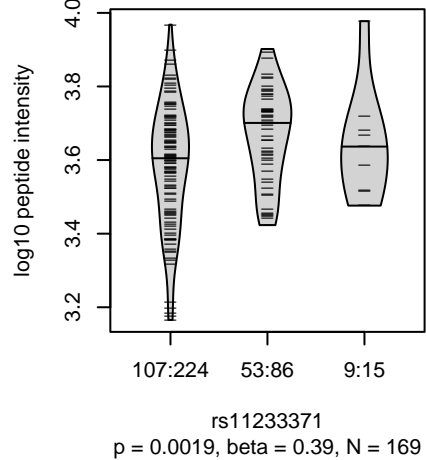**DITDTLVAVTISEGAHHLDLR pc3**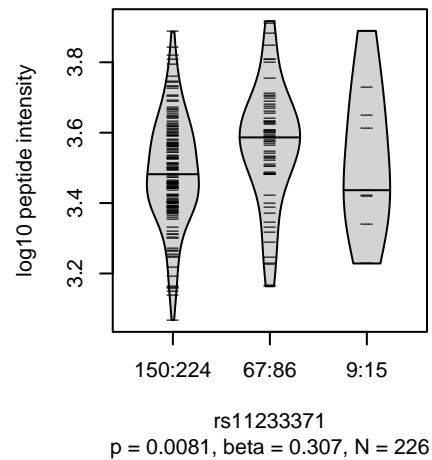**HLNFLTSEQALADFAELIK pc3**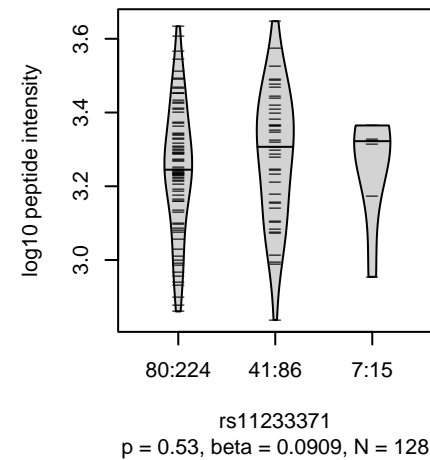**NALDPMSVLLAR pc2**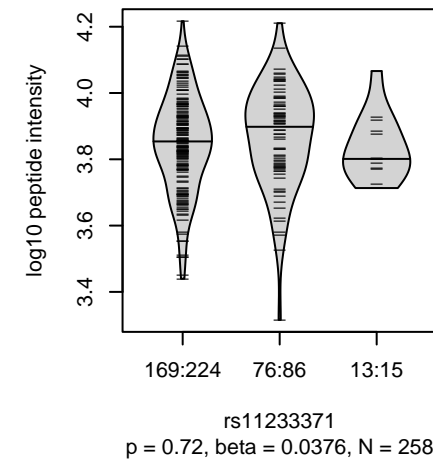

Locus: 204 (Sort: 232)  
 Status: Not replicated  
 80% power: No  
 SNP: 11:82623337:T:C  
 rsID: rs11233371  
 UniProtID: P42785  
 HGNC gene: PRCP  
 Type: Cis-pQTL

**HLA-B [cis]**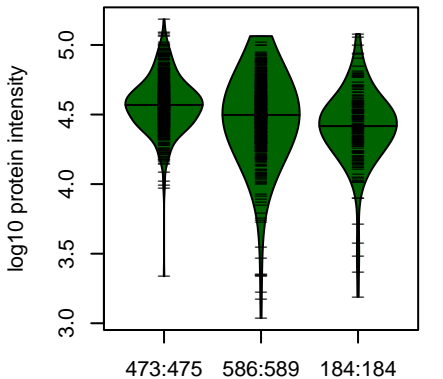

6:32549356:T:C\_C  
 $p = 4.8e-12$ ,  $\beta = -0.281$ ,  $N = 1243$

**FDSAASPR pc2**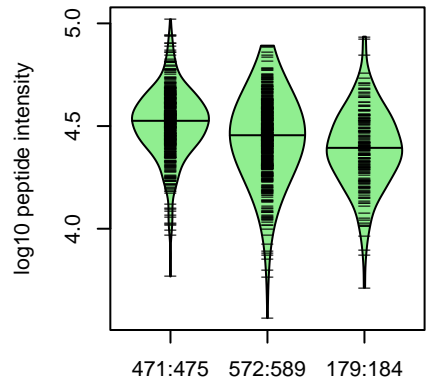

6:32549356:T:C\_C  
 $p = 2.2e-13$ ,  $\beta = -0.299$ ,  $N = 1222$

**SWTAADTAAQITQR pc2**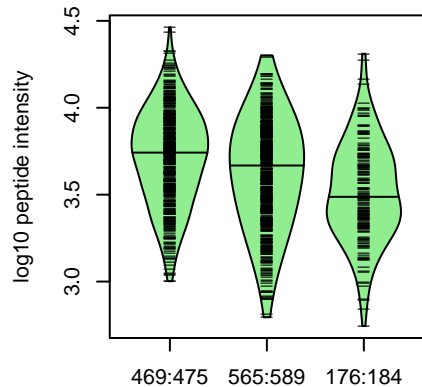

6:32549356:T:C\_C  
 $p = 1.9e-12$ ,  $\beta = -0.29$ ,  $N = 1210$

**DYIALNEDLR pc2**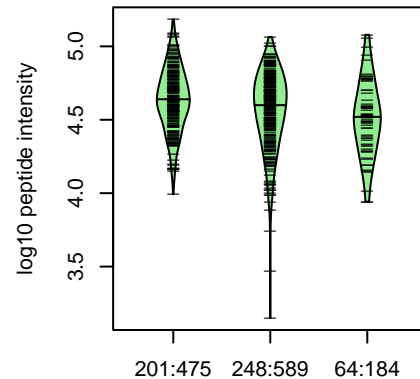

6:32549356:T:C\_C  
 $p = 0.0017$ ,  $\beta = -0.205$ ,  $N = 513$

**DGEDQTQDTELVETRPAGDR pc3**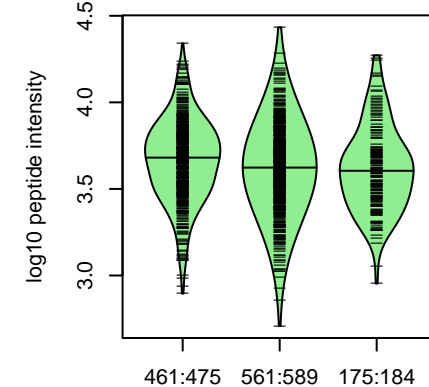

6:32549356:T:C\_C  
 $p = 0.013$ ,  $\beta = -0.103$ ,  $N = 1197$

**P01889 NP2**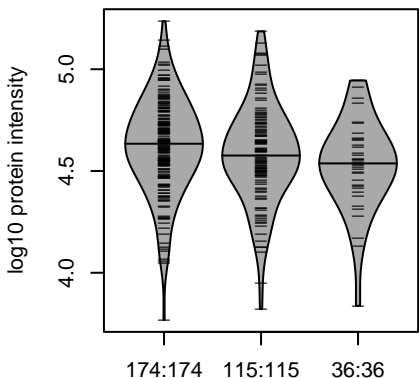

rs2308818  
 $p = 0.03$ ,  $\beta = -0.173$ ,  $N = 325$

**SWTAADTAAQITQR pc2**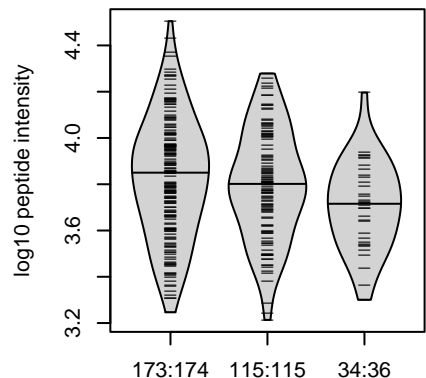

rs2308818  
 $p = 0.017$ ,  $\beta = -0.193$ ,  $N = 322$

**FDSAASPR pc2**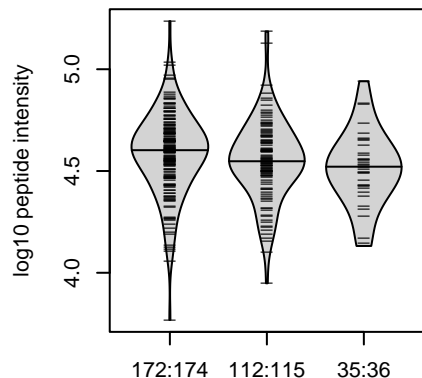

rs2308818  
 $p = 0.023$ ,  $\beta = -0.184$ ,  $N = 319$

**THVTHHPISDHEATLR pc4**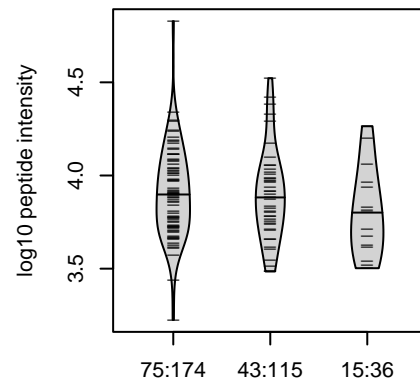

rs2308818  
 $p = 0.15$ ,  $\beta = -0.177$ ,  $N = 133$

**RAYLEGECVEWLR pc3**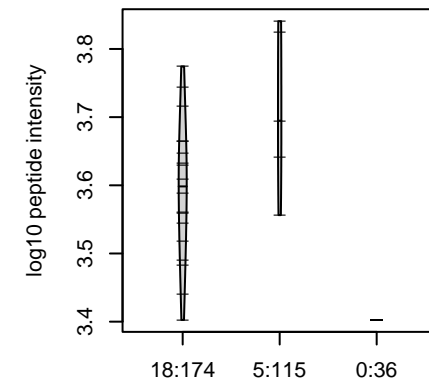

rs2308818  
 $p = 0.21$ ,  $\beta = 0.583$ ,  $N = 23$

Locus: 206 (Sort: 234)  
 Status: Not replicated  
 80% power: No  
 SNP: 6:32549356:T:C  
 rsID: rs2308818  
 UniProtID: P01889  
 HGNC gene: HLA-B  
 Type: Cis-pQTL

**GEPRFISGVYDDTQFVR pc3  
rs1050437 REF**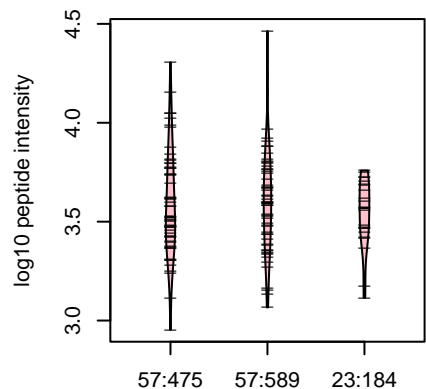

6:32549356:T:C\_C  
 $p = 0.4$ , model = REC,  $N = 137$

**FISVG YVDDTQFVR pc2  
rs1050437 REF**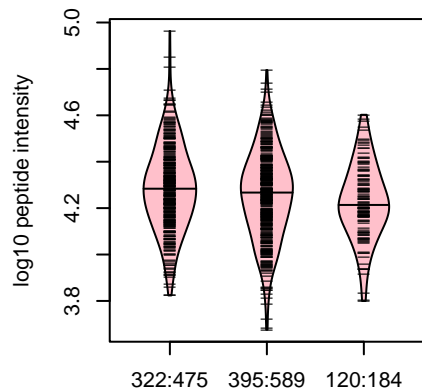

6:32549356:T:C\_C  
 $p = 0.55$ , model = DOM,  $N = 846$

**WAAVVVPSGEEQR pc2  
rs707908;rs1736924 ALT**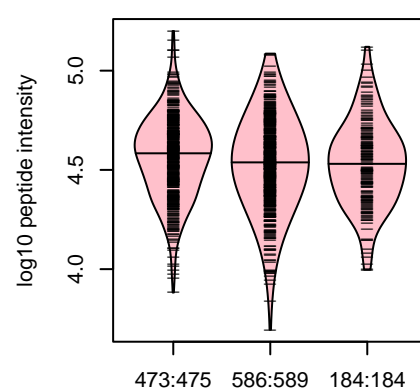

6:32549356:T:C\_C  
 $p = 1$ , model = DOM,  $N = 1255$



**SFTPD [cis]**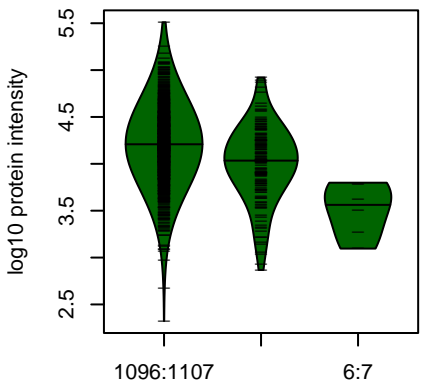

10:81716268:C:A\_A  
 $p = 5.5e-12$ ,  $\beta = -0.567$ ,  $N = 1240$

**SAAENAALQQLVVAK pc2**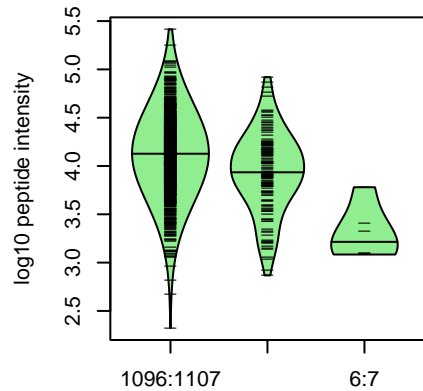

10:81716268:C:A\_A  
 $p = 2.5e-10$ ,  $\beta = -0.521$ ,  $N = 1240$

**NEAAFLSMTDSK pc2**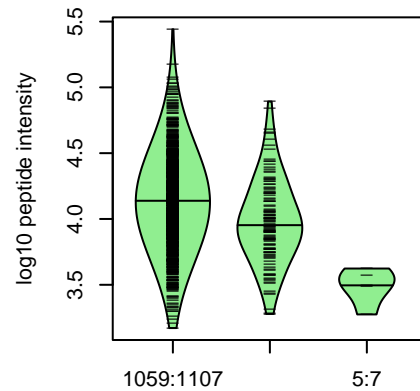

10:81716268:C:A\_A  
 $p = 4.3e-08$ ,  $\beta = -0.481$ ,  $N = 1186$

**QGNIGPQGK pc2**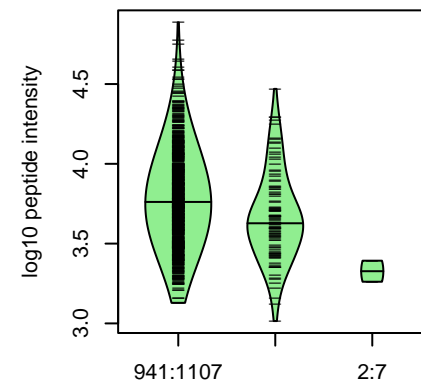

10:81716268:C:A\_A  
 $p = 2.6e-06$ ,  $\beta = -0.462$ ,  $N = 1048$

**KVELFPNGQSVGEK pc3**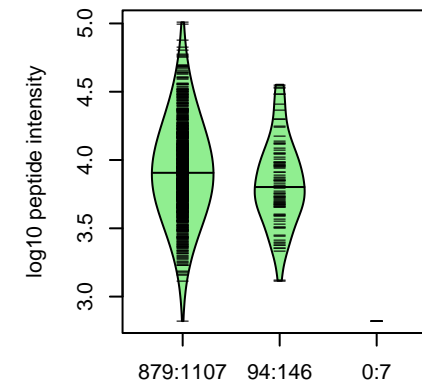

10:81716268:C:A\_A  
 $p = 0.0013$ ,  $\beta = -0.348$ ,  $N = 973$

**P35247 NP5**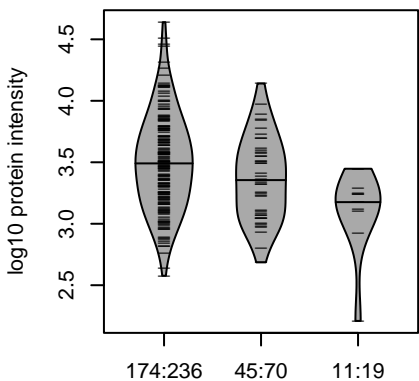

rs10887238  
 $p = 0.04$ ,  $\beta = -0.245$ ,  $N = 230$

**SAAENAALQQLVVAK pc2**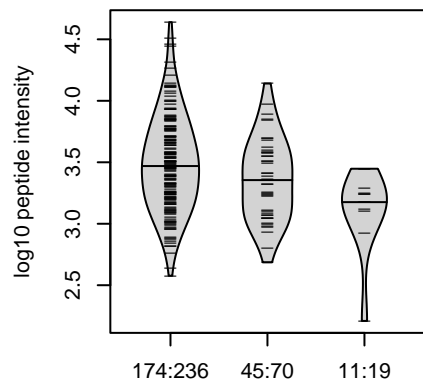

rs10887238  
 $p = 0.037$ ,  $\beta = -0.246$ ,  $N = 230$

**NEAAFLSMTDSK pc2**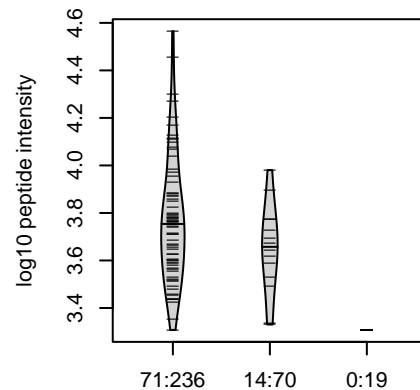

rs10887238  
 $p = 0.74$ ,  $\beta = -0.0936$ ,  $N = 85$

**PFTEAQLLCTQAGGQLASPR pc3  
rs3088308 REF**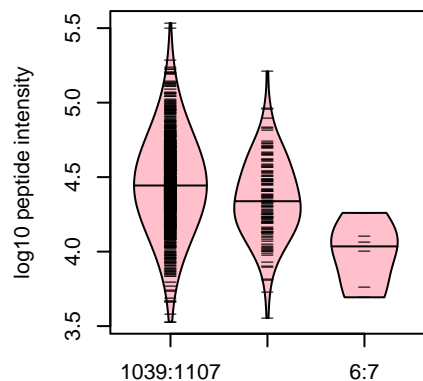

10:81716268:C:A\_A  
 $p = 0.00066$ ,  $\text{model} = \text{REC}$ ,  $N = 1170$

**PFTEAQLLCTQAGGQLATPR pc3  
rs3088308 ALT**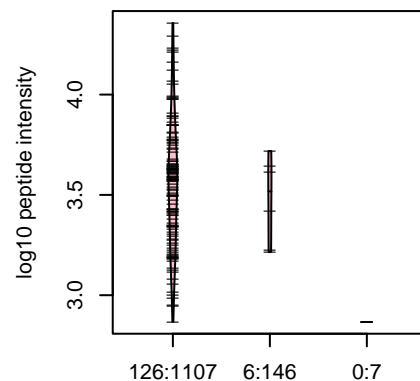

10:81716268:C:A\_A  
 $p = 0.0029$ ,  $\text{model} = \text{REC}$ ,  $N = 132$

Locus: 207 (Sort: 235)  
 Status: Not replicated  
 80% power: No  
 SNP: 10:81716268:C:A  
 rsID: rs10887238  
 UniProtID: P35247  
 HGNC gene: SFTPD  
 Type: Cis-pQTL

**NID2 [cis]**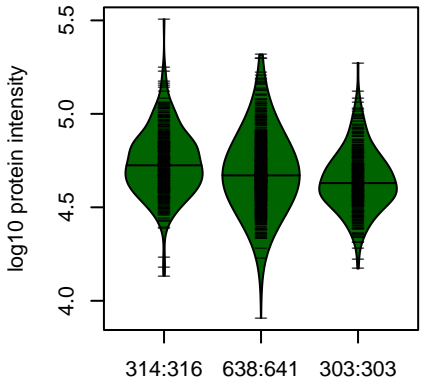

14:52490104:C:T\_T  
 $p = 7.8e-12$ ,  $\beta = -0.272$ ,  $N = 1255$

**VFALYNDEER pc2**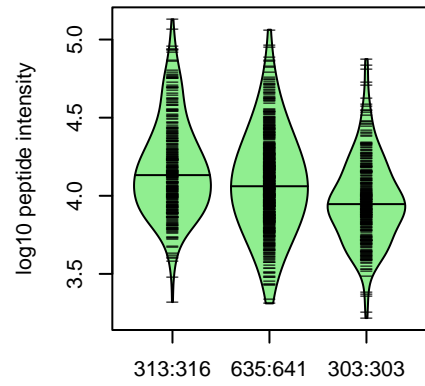

14:52490104:C:T\_T  
 $p = 1.8e-17$ ,  $\beta = -0.336$ ,  $N = 1251$

**FAVTNQGIPVK pc2**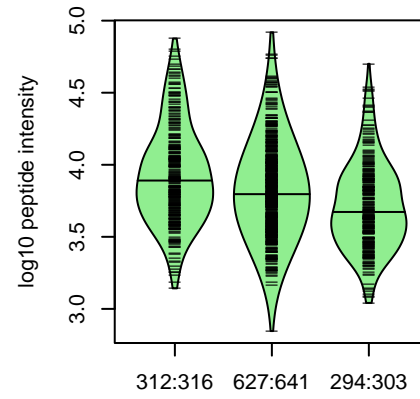

14:52490104:C:T\_T  
 $p = 8.1e-17$ ,  $\beta = -0.332$ ,  $N = 1233$

**IETSSLDGENRR pc3**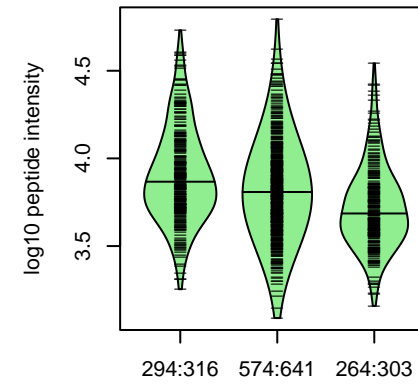

14:52490104:C:T\_T  
 $p = 6.3e-16$ ,  $\beta = -0.336$ ,  $N = 1132$

**LLCWADAGTK pc2**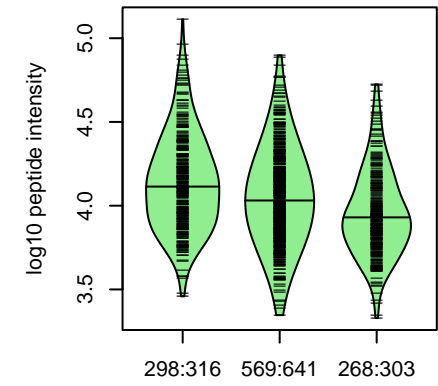

14:52490104:C:T\_T  
 $p = 8.6e-15$ ,  $\beta = -0.321$ ,  $N = 1135$

**Q14112 NP2**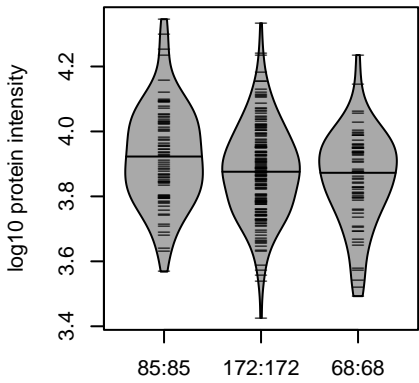

rs10137847  
 $p = 0.0084$ ,  $\beta = -0.211$ ,  $N = 325$

**VFALYNDEER pc2**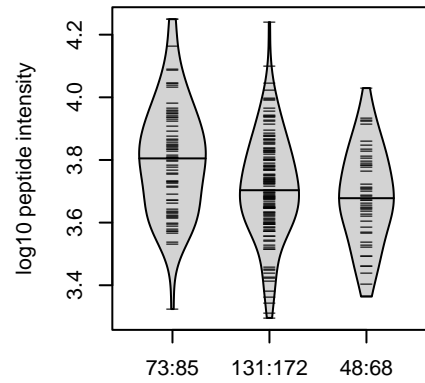

rs10137847  
 $p = 0.00046$ ,  $\beta = -0.314$ ,  $N = 252$

**SDFCWCVDK pc2**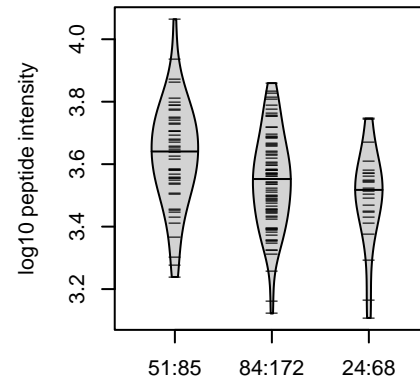

rs10137847  
 $p = 0.0017$ ,  $\beta = -0.36$ ,  $N = 159$

**NCVDENECATGFHR pc3**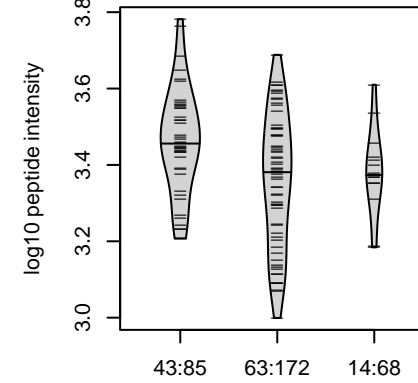

rs10137847  
 $p = 0.0057$ ,  $\beta = -0.376$ ,  $N = 120$

**ESYNVQLQLPAR pc2**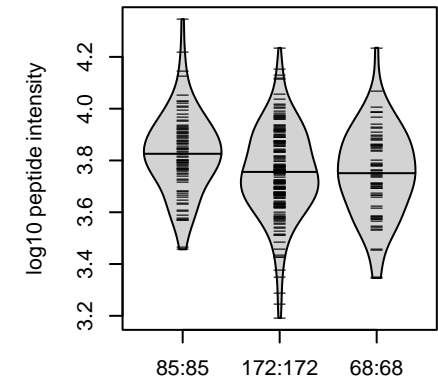

rs10137847  
 $p = 0.0076$ ,  $\beta = -0.213$ ,  $N = 325$

Locus: 208 (Sort: 236)

Status: Not replicated

80% power: No

SNP: 14:52490104:C:T

rsID: rs10137847

UniProtID: Q14112

HGNC gene: NID2

Type: Cis-pQTL

**HP [cis]**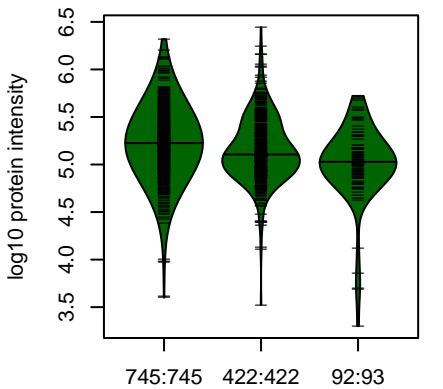

16:71935210:G:A\_G  
 $p = 8.2e-12$ ,  $\beta = -0.302$ ,  $N = 1259$

**VTSIQDWVQK pc2**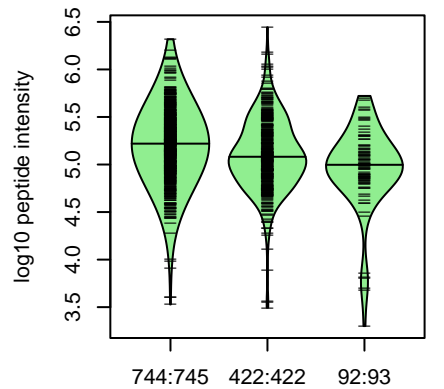

16:71935210:G:A\_G  
 $p = 1.3e-12$ ,  $\beta = -0.313$ ,  $N = 1258$

**LPECEAVCGKPK pc2**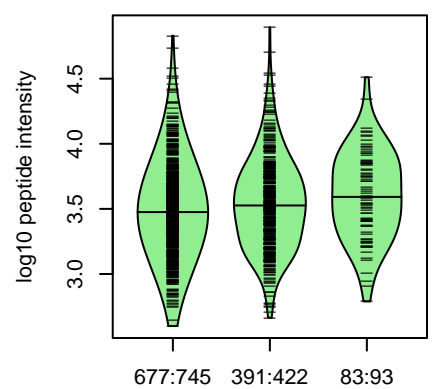

16:71935210:G:A\_G  
 $p = 0.0049$ ,  $\beta = 0.131$ ,  $N = 1151$

**AVGDKLPECEAVCGK pc3**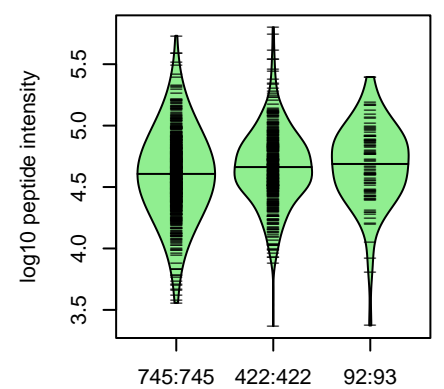

16:71935210:G:A\_G  
 $p = 0.0056$ ,  $\beta = 0.123$ ,  $N = 1259$

**LRTEGDGVYTLNNEK pc2**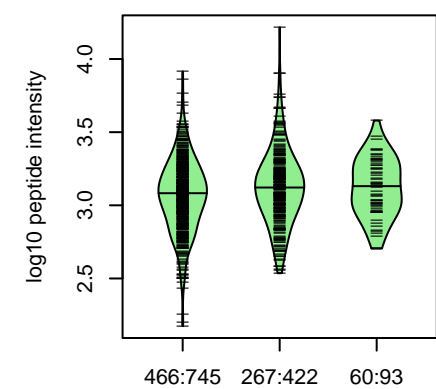

16:71935210:G:A\_G  
 $p = 0.0061$ ,  $\beta = 0.152$ ,  $N = 793$

**P00738 NP4**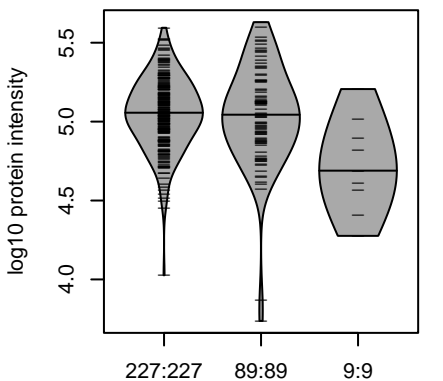

rs12449139  
 $p = 0.0077$ ,  $\beta = -0.28$ ,  $N = 325$

**VTSIQDWVQK pc3**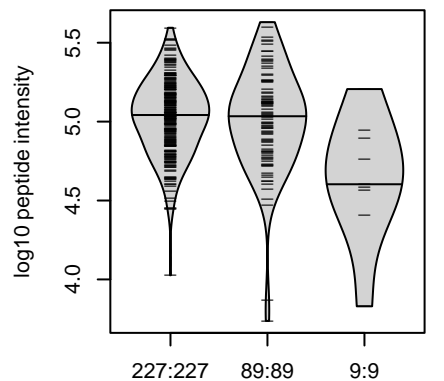

rs12449139  
 $p = 0.0064$ ,  $\beta = -0.283$ ,  $N = 325$

**LPECEAVCGKPK pc3**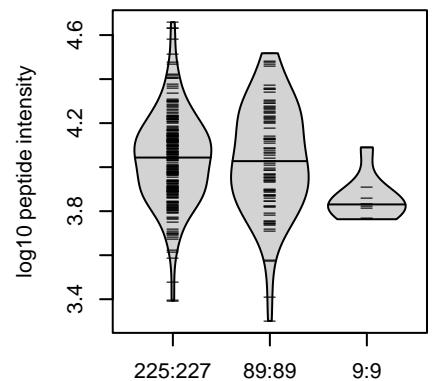

rs12449139  
 $p = 0.03$ ,  $\beta = -0.226$ ,  $N = 323$

**VVLHPNYSQVDIGLIK pc2**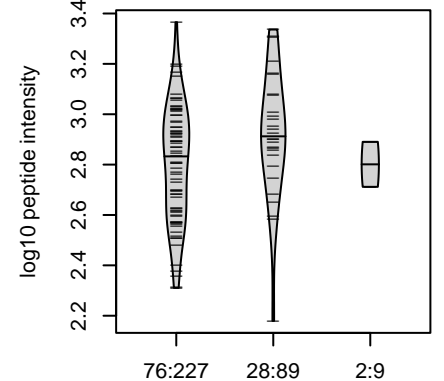

rs12449139  
 $p = 0.033$ ,  $\beta = 0.4$ ,  $N = 106$

**AVGDKLPECEAVCGK pc3**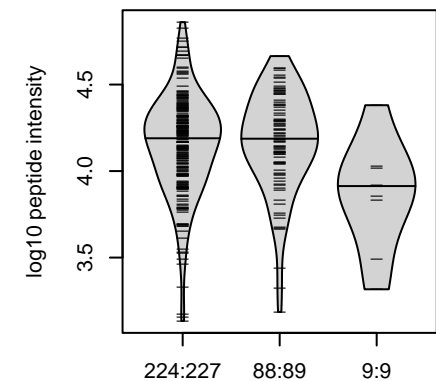

rs12449139  
 $p = 0.054$ ,  $\beta = -0.202$ ,  $N = 321$

Locus: 209 (Sort: 237)

Status: Not replicated

80% power: No

SNP: 16:71935210:G:A

rsID: rs12449139

UniProtID: P00738

HGNC gene: HP

Type: Cis-pQTL

### HLA-G [cis]

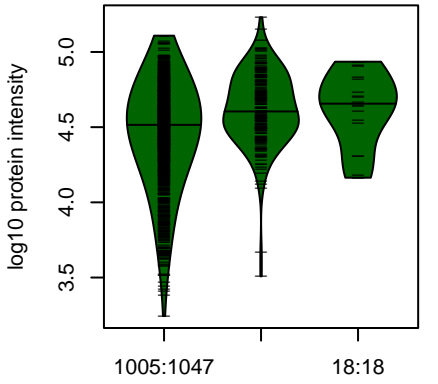

6:29811876:A:G\_G  
 $p = 8.9e-12$ ,  $\beta = 0.454$ ,  $N = 1213$

### DYLALNEDLR pc2

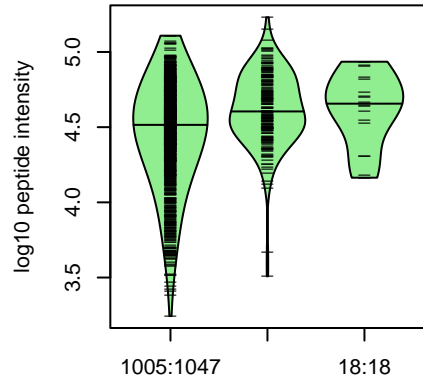

6:29811876:A:G\_G  
 $p = 8.9e-12$ ,  $\beta = 0.454$ ,  $N = 1213$

### Q5RJ85 NP1

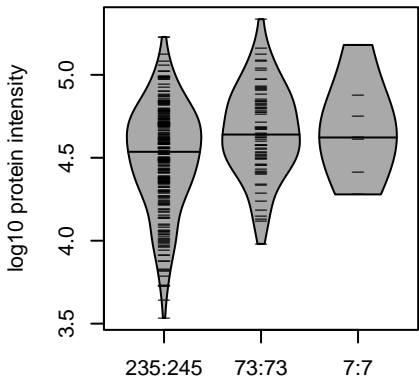

rs9258550  
 $p = 0.0039$ ,  $\beta = 0.326$ ,  $N = 315$

### DYLALNEDLR pc2

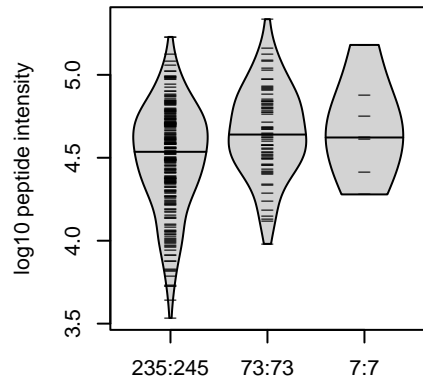

rs9258550  
 $p = 0.0043$ ,  $\beta = 0.32$ ,  $N = 315$

Locus: 210 (Sort: 238)

Status: Not replicated

80% power: No

SNP: 6:29811876:A:G

rsID: rs9258550

UniProtID: Q5RJ85

HGNC gene: HLA-G

Type: Cis-pQTL

### WAAVVPSGEEQR pc2 rs707908;rs1736924 ALT

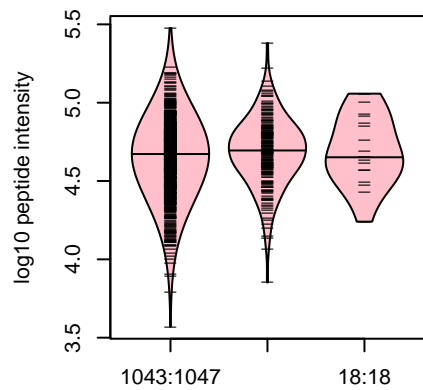

6:29811876:A:G\_G  
 $p = 1$ , model = DOM,  $N = 1255$

**HEG1 [cis]**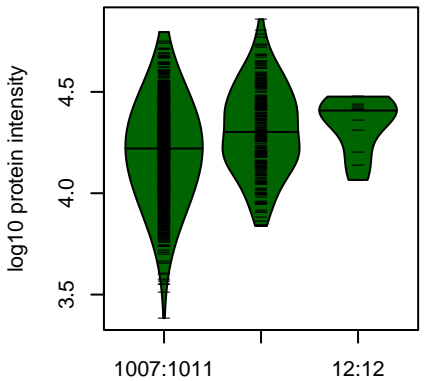

3:124768220:G:A\_A  
 $p = 9.2e-12$ ,  $\beta = 0.444$ ,  $N = 1254$

**SGTASEMGTER pc2**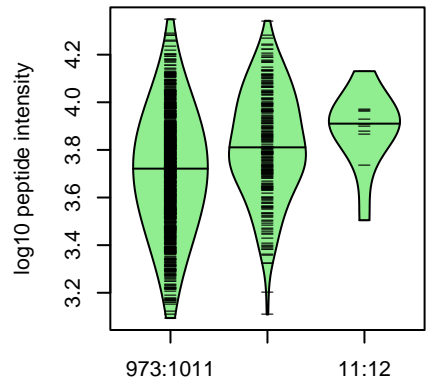

3:124768220:G:A\_A  
 $p = 6.1e-12$ ,  $\beta = 0.452$ ,  $N = 1219$

**EGVMVQTS GK pc2**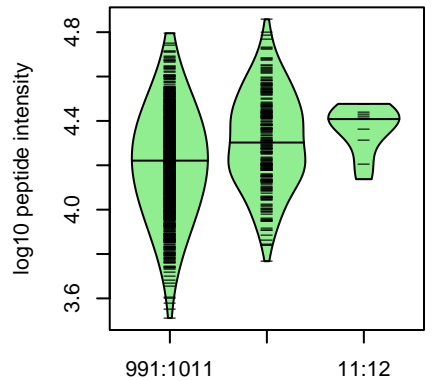

3:124768220:G:A\_A  
 $p = 1.4e-11$ ,  $\beta = 0.444$ ,  $N = 1237$

**ALSLAPLAGAGLELQLER pc2**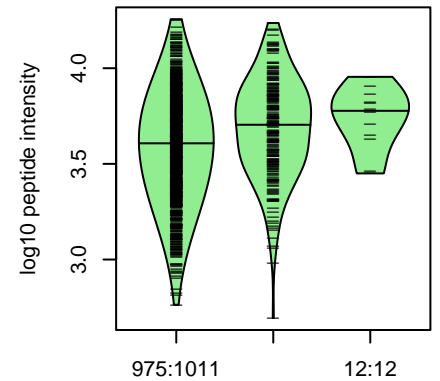

3:124768220:G:A\_A  
 $p = 6.2e-08$ ,  $\beta = 0.357$ ,  $N = 1218$

**GGSDAAWK pc2**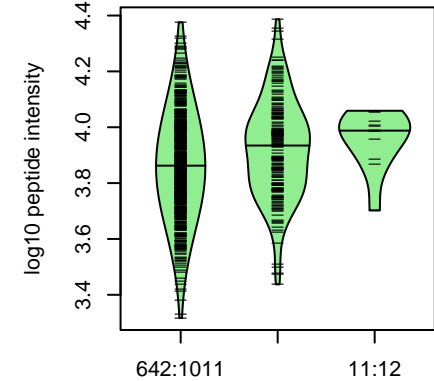

3:124768220:G:A\_A  
 $p = 4.8e-06$ ,  $\beta = 0.333$ ,  $N = 850$

**Q9ULI3 NP2**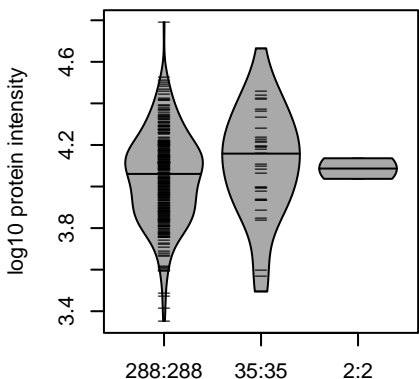

rs9835358  
 $p = 0.065$ ,  $\beta = 0.295$ ,  $N = 325$

**EGVMVQTS GK pc2**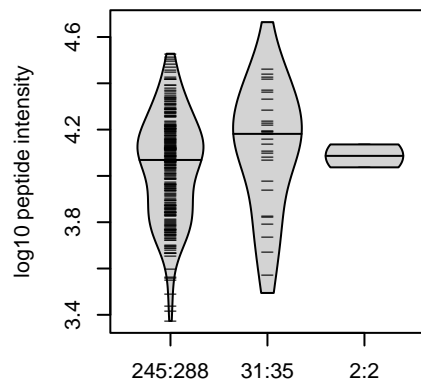

rs9835358  
 $p = 0.058$ ,  $\beta = 0.317$ ,  $N = 278$

**SGTASEMGTER pc2**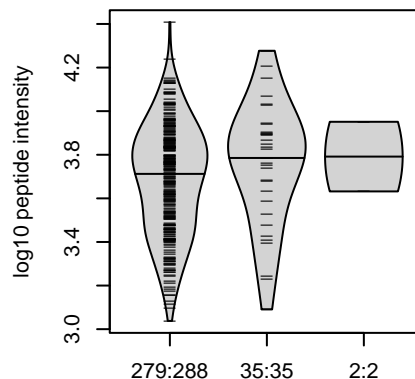

rs9835358  
 $p = 0.06$ ,  $\beta = 0.3$ ,  $N = 316$

**ALSLAPLAGAGLELQLER pc2**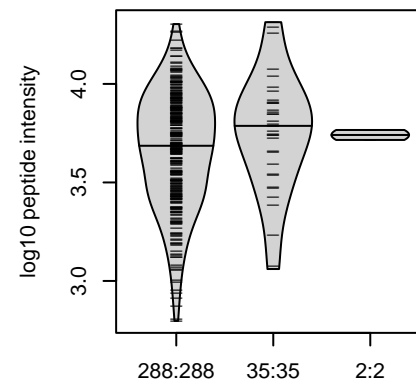

rs9835358  
 $p = 0.097$ ,  $\beta = 0.265$ ,  $N = 325$

**SLTVSLGPVSK pc2**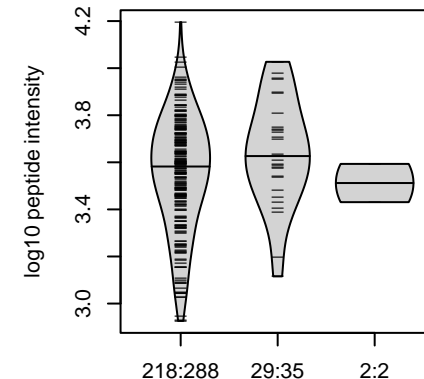

rs9835358  
 $p = 0.12$ ,  $\beta = 0.268$ ,  $N = 249$

Locus: 211 (Sort: 239)

Status: Not replicated

80% power: No

SNP: 3:124768220:G:A

rsID: rs9835358

UniProtID: Q9ULI3

HGNC gene: HEG1

Type: Cis-pQTL

**MBL2 [cis]**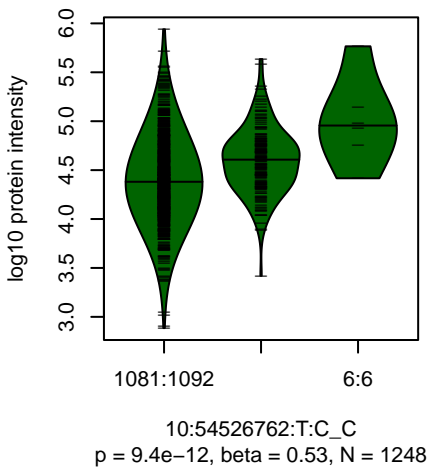**EEAFLGITDEK pc2**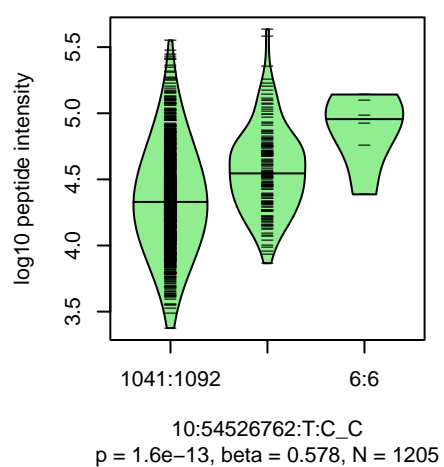**TEGQFVDLTGNR pc2**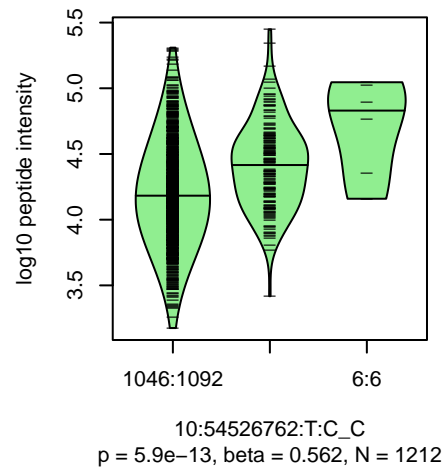**WLTFSLGK pc2**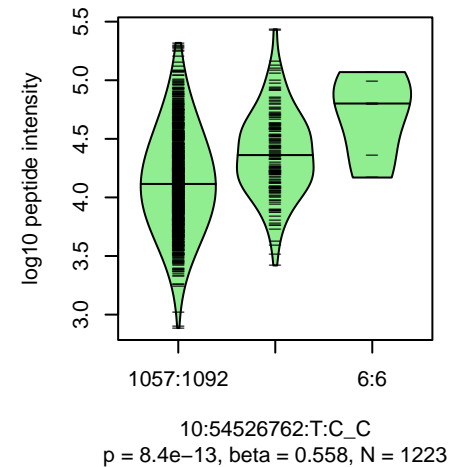**FFLTNGEIMTFEK pc2**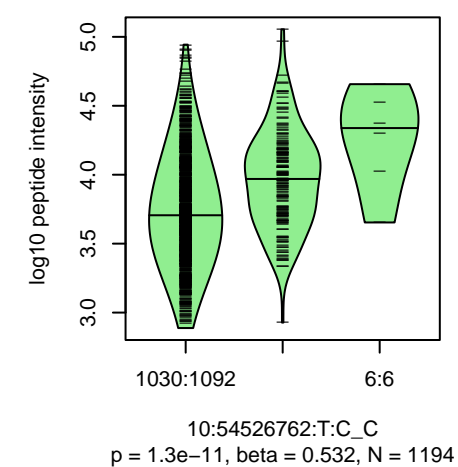**P11226 NP2**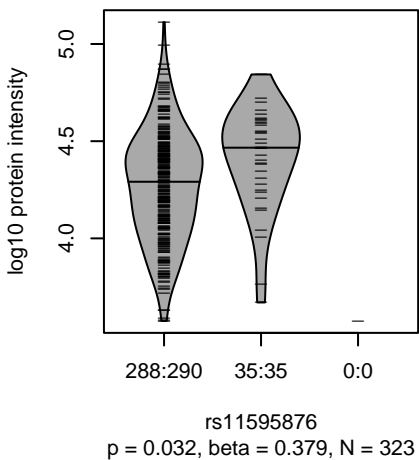**NAAENGAIQNLIK pc2**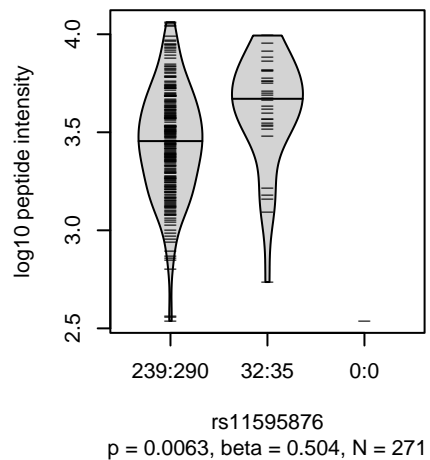**TEGQFVDLTGNR pc2**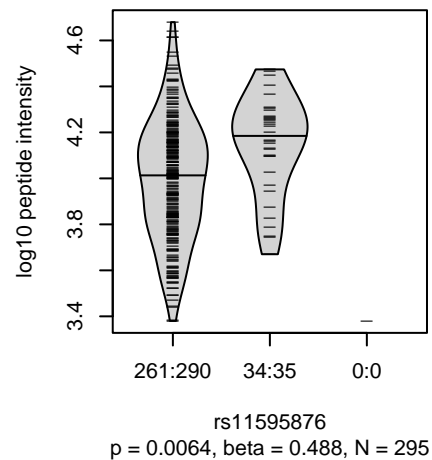**WLTFSLGK pc2**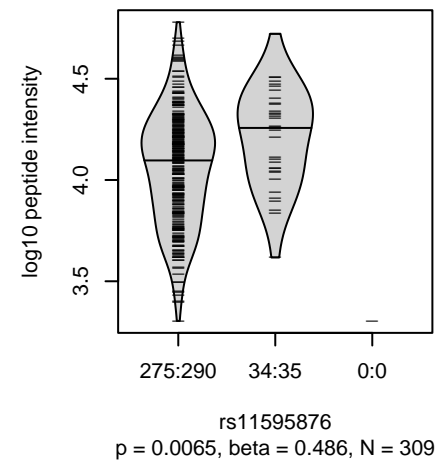**EEAFLGITDEK pc2**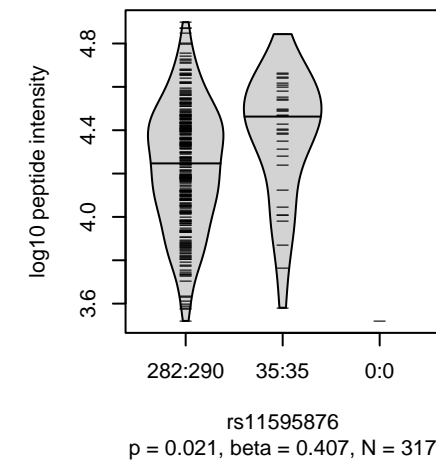

Locus: 212 (Sort: 240)  
 Status: Not replicated  
 80% power: No  
 SNP: 10:54526762:T:C  
 rsID: rs11595876  
 UniProtID: P11226  
 HGNC gene: MBL2  
 Type: Cis-pQTL

**SRCRB4D [cis]**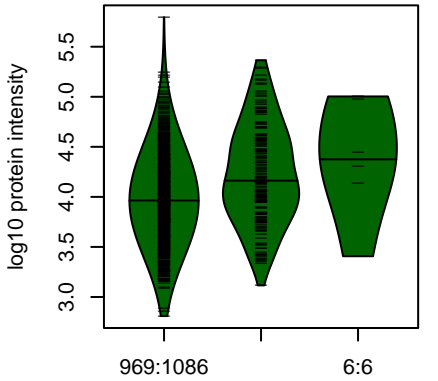

7:76044757:G:T\_T  
 $p = 9.8e-12$ ,  $\beta = 0.528$ ,  $N = 1140$

**EAGCGPALGATGLGHFGYGR pc3**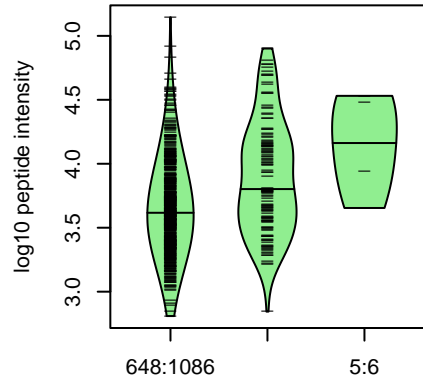

7:76044757:G:T\_T  
 $p = 8.8e-11$ ,  $\beta = 0.575$ ,  $N = 779$

**GPILLDNVK pc2**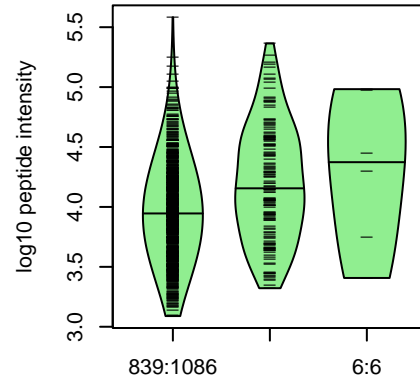

7:76044757:G:T\_T  
 $p = 1.5e-10$ ,  $\beta = 0.519$ ,  $N = 995$

**LVGGPGPCR pc2**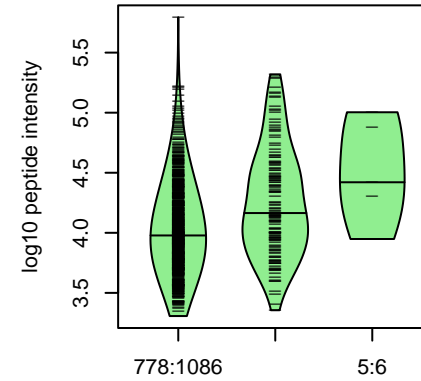

7:76044757:G:T\_T  
 $p = 8.4e-10$ ,  $\beta = 0.516$ ,  $N = 925$

**QLGCGQALAAPGEAHFGPGR pc2**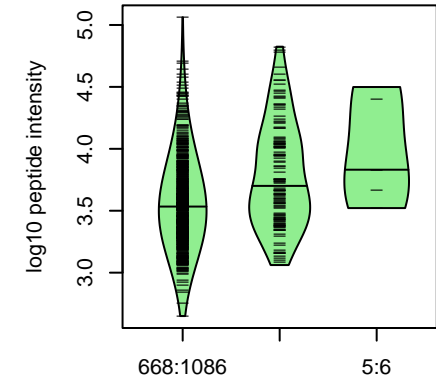

7:76044757:G:T\_T  
 $p = 1.7e-09$ ,  $\beta = 0.526$ ,  $N = 805$

**Q8WTU2 NP2**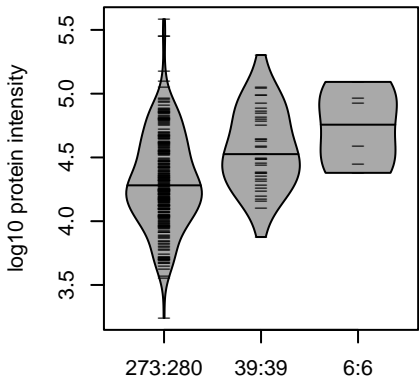

rs111666614  
 $p = 3.4e-08$ ,  $\beta = 0.725$ ,  $N = 318$

**GPILLDNVK pc2**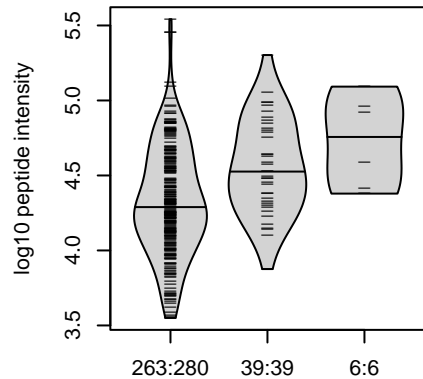

rs111666614  
 $p = 5.7e-08$ ,  $\beta = 0.709$ ,  $N = 308$

**LVGGANLCQGR pc2**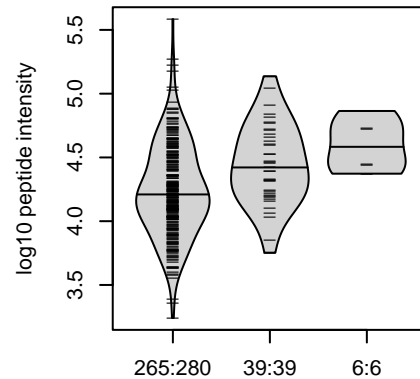

rs111666614  
 $p = 5.3e-07$ ,  $\beta = 0.657$ ,  $N = 310$

**VELYLGQR pc2**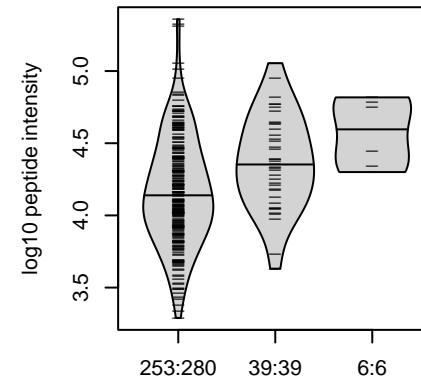

rs111666614  
 $p = 1.8e-06$ ,  $\beta = 0.628$ ,  $N = 298$

**QLGCGQALAAPGEAHFGPGR pc2**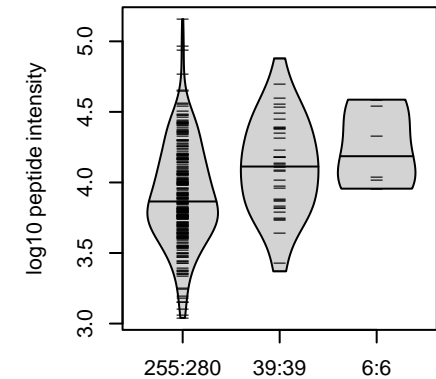

rs111666614  
 $p = 4.9e-06$ ,  $\beta = 0.602$ ,  $N = 300$

Locus: 213 (Sort: 241)  
 Status: Replicated  
 80% power: No  
 SNP: 7:76044757:G:T  
 rsID: rs111666614  
 UniProtID: Q8WTU2  
 HGNC gene: SRCRB4D  
 Type: Cis-pQTL

**QGEAALSECGSR pc2  
rs4728712 REF**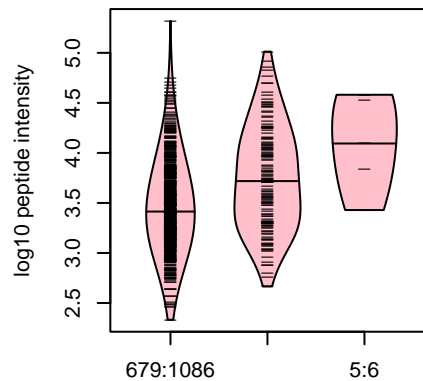

7:76044757:G:T\_T  
 $p = 1.1e-09$ , model = REC,  $N = 827$

**GPILLDNVECR pc2  
rs4728712 REF**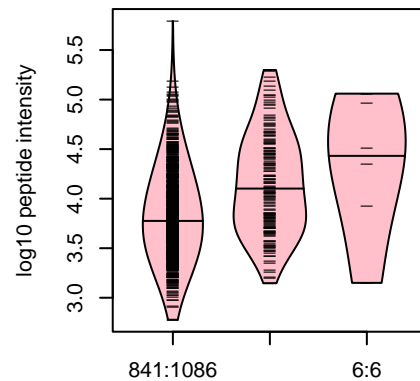

7:76044757:G:T\_T  
 $p = 7.8e-08$ , model = REC,  $N = 1004$

### HLA-G [cis]

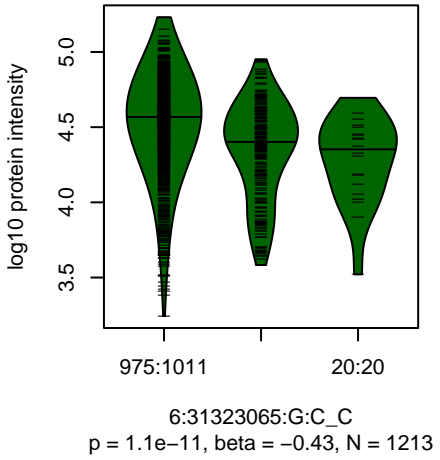

### DYLALNEDLR pc2

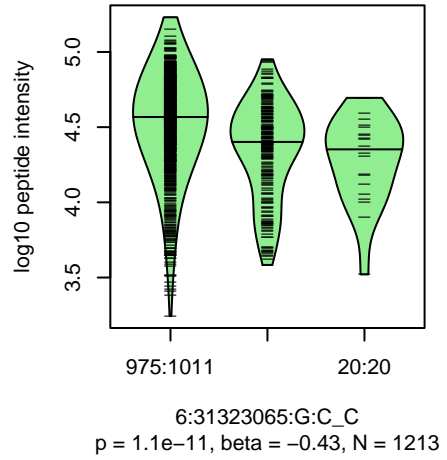

### Q5RJ85 NP1

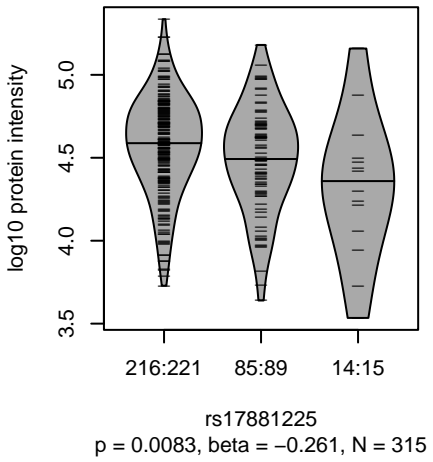

### DYLALNEDLR pc2

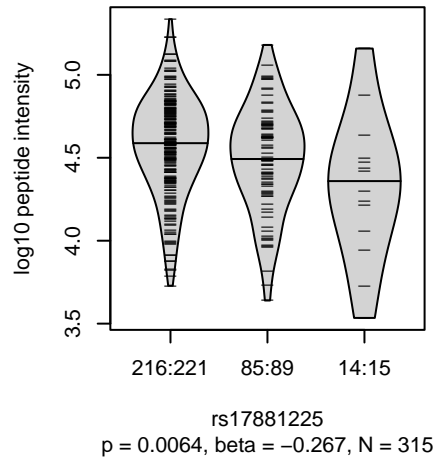

Locus: 214 (Sort: 242)  
Status: Not replicated  
80% power: No  
SNP: 6:31323065:G:C  
rsID: rs17881225  
UniProtID: Q5RJ85  
HGNC gene: HLA-G  
Type: Cis-pQTL

### WAAVVPSGEEQR pc2 rs707908;rs1736924 ALT

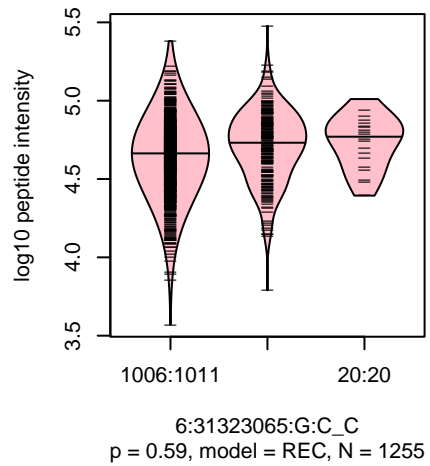



**CFHR3 [cis]**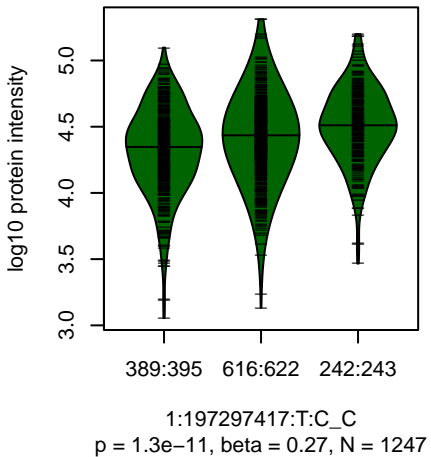**TGDTIEFMCK pc2**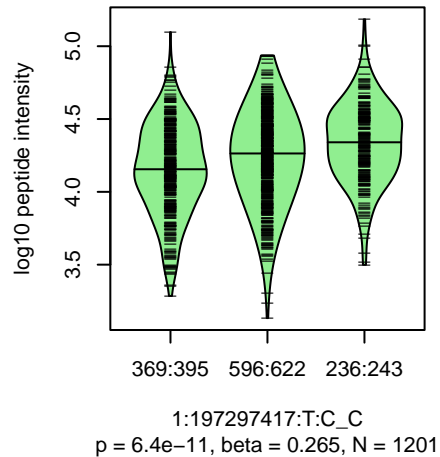**AQTTVTCTEK pc2**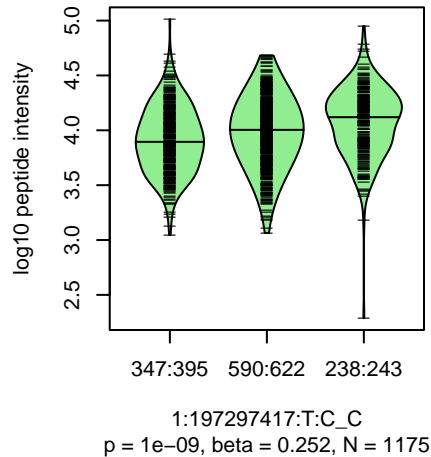**VYVPQSR pc2**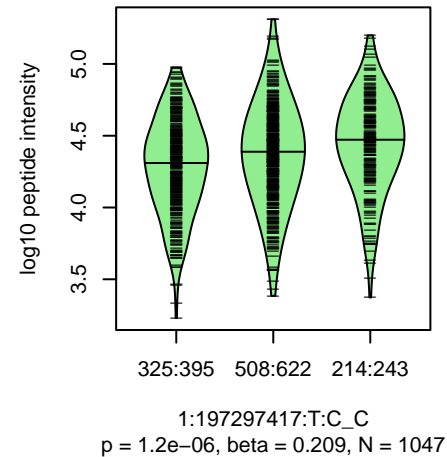**CIHPCIITEENMNK pc3**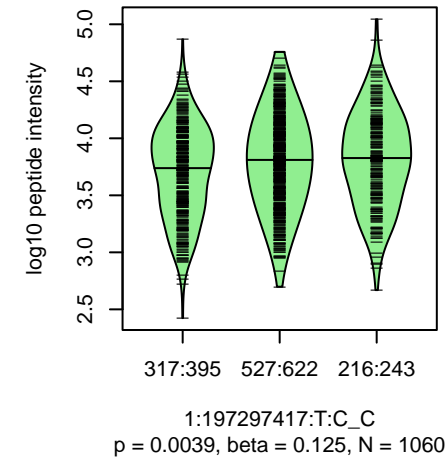**Q02985 NP5**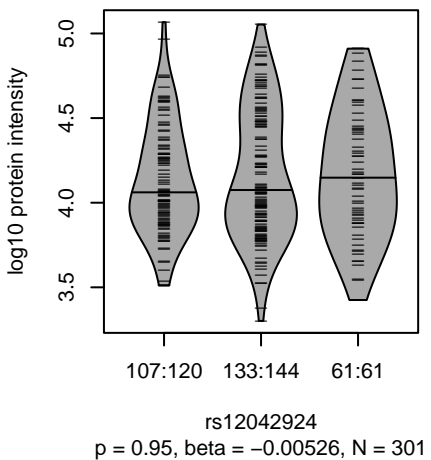**PCDFPDIK pc2**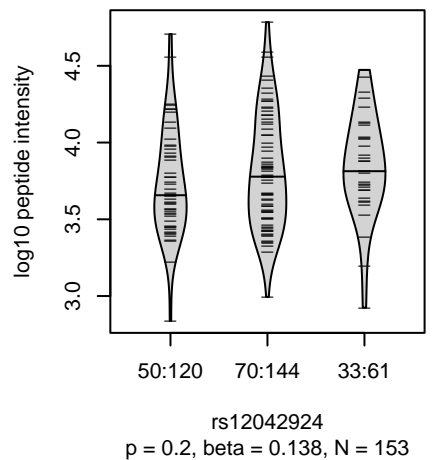**EGIVEYPRCE pc2**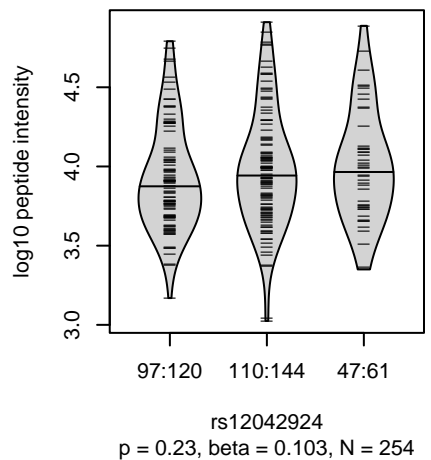**VYVPQSR pc2**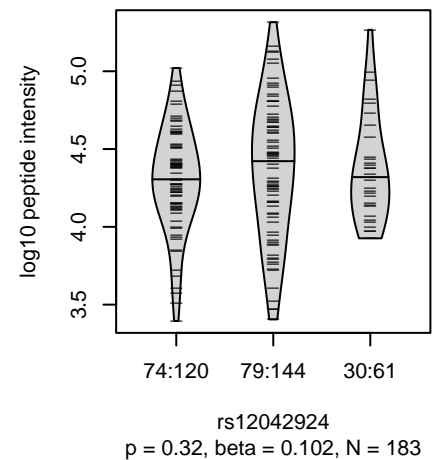**GWSPTPR pc2**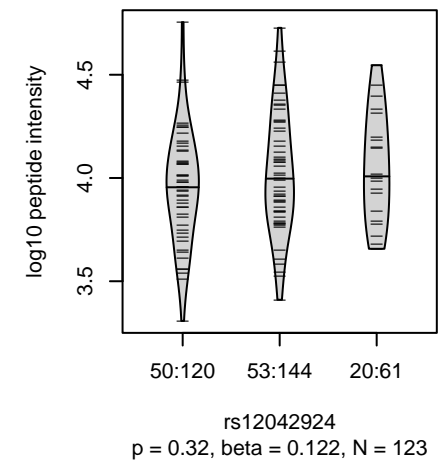**CYFPYLENGYNQNYGR pc3  
rs1061170 ALT**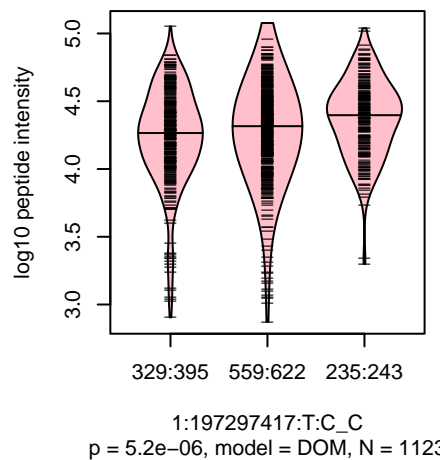**CYFPYLENGYNQNYGRK pc3  
rs1061170 ALT**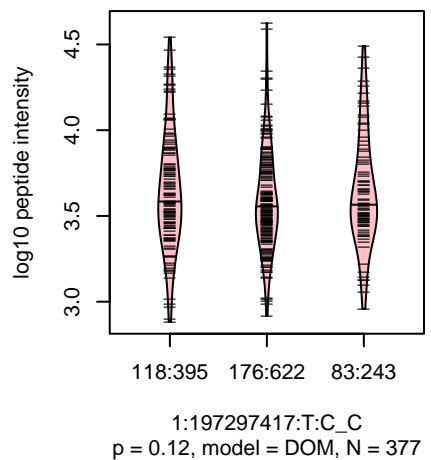

Locus: 215 (Sort: 243)  
Status: Not replicated  
80% power: No  
SNP: 1:197297417:T:C  
rsID: rs12042924  
UniProtID: Q02985  
HGNC gene: CFHR3  
Type: Cis-pQTL

**PADI4 [cis]**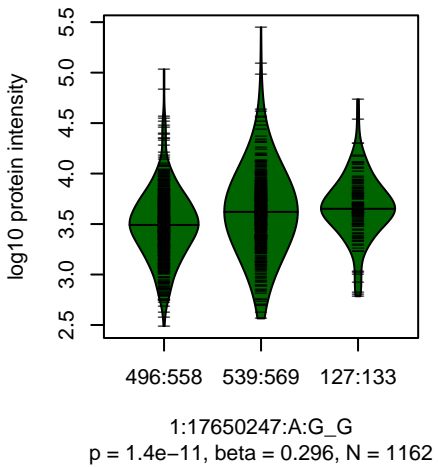**AEAFFPNMVMNMLVLGK pc2**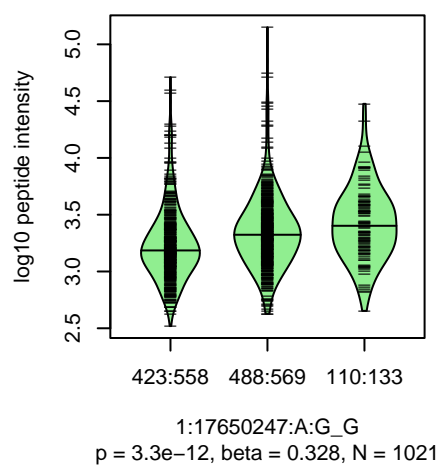**TLPVVFDSR pc2**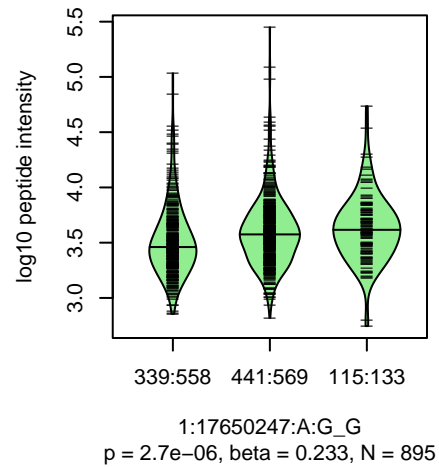**PFGPVIINGR pc2**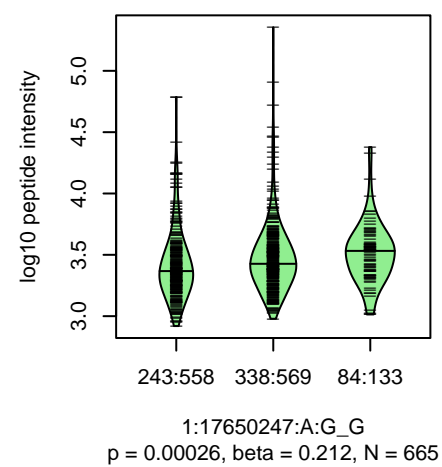**CSVVLGPK pc2**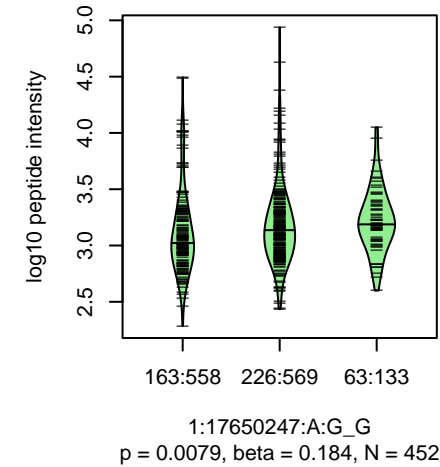**Q9UM07 NP1**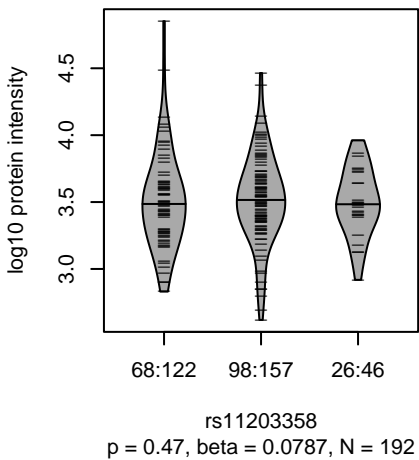**QMHQALQDFLSAQVQAPVK pc2**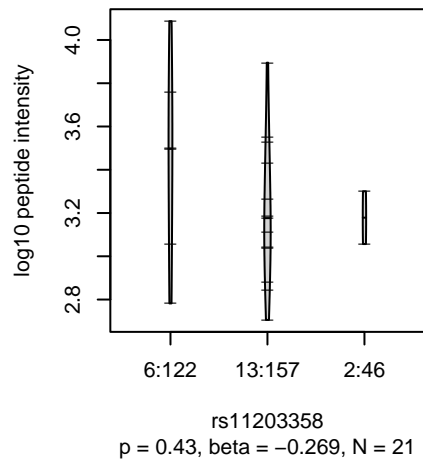**TLPVVFDSR pc2**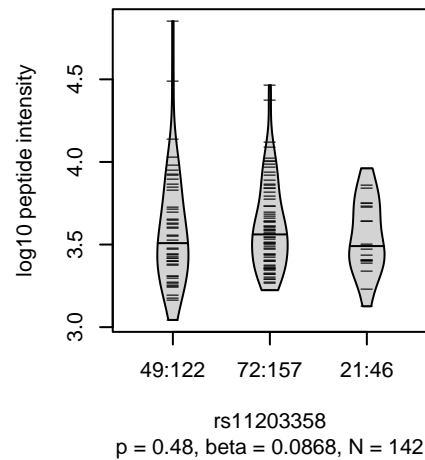**AEAFFPNMVMNMLVLGK pc2**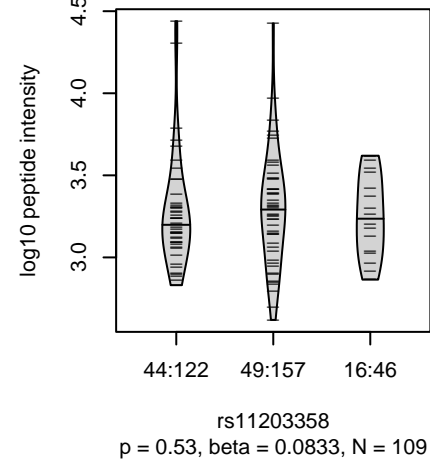**VMGPDFGYVTR pc2**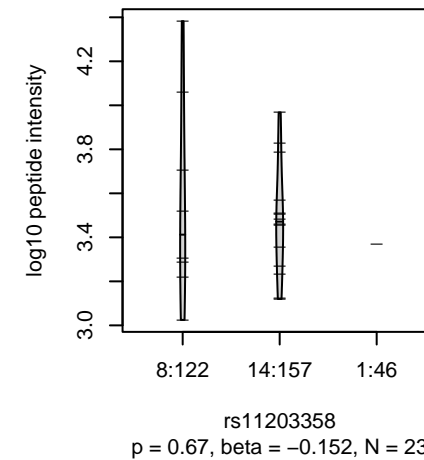

Locus: 216 (Sort: 244)

Status: Not replicated

80% power: No

SNP: 1:17650247:A:G

rsID: rs11203358

UniProtID: Q9UM07

HGNC gene: PADI4

Type: Cis-pQTL

**HSP90B1 [cis]**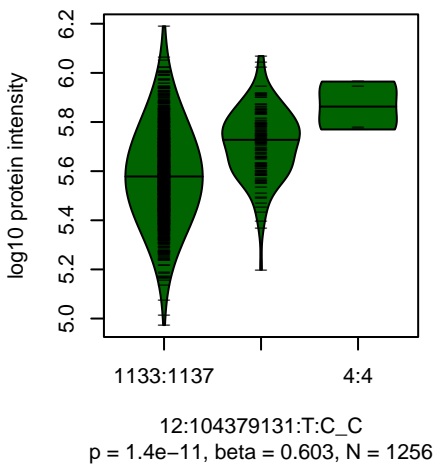**LIINSLYK pc2**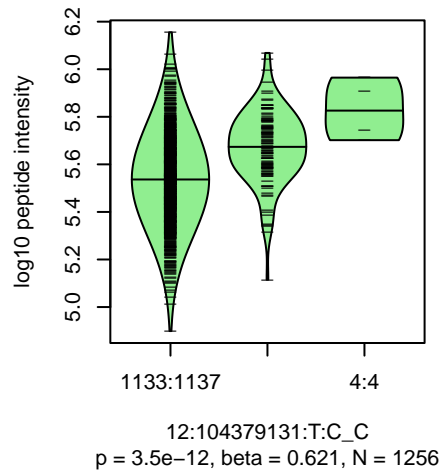**DISTNYYASQK pc2**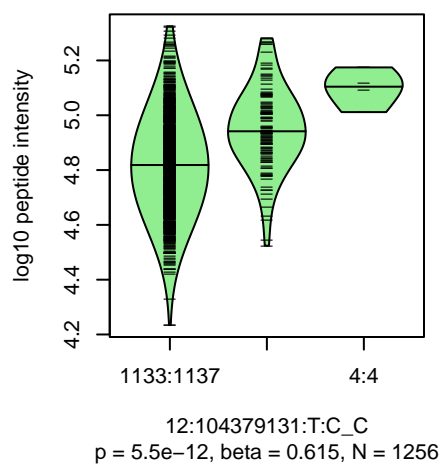**GLFDEYGSK pc2**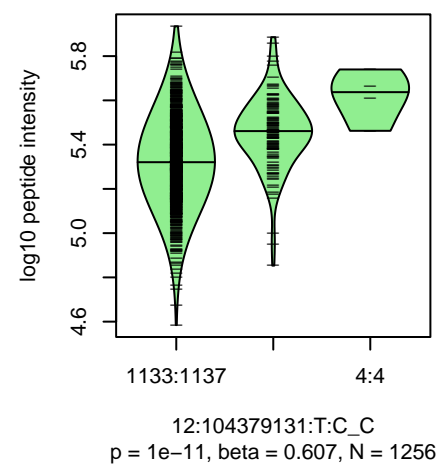**SILFVPTSAPR pc2**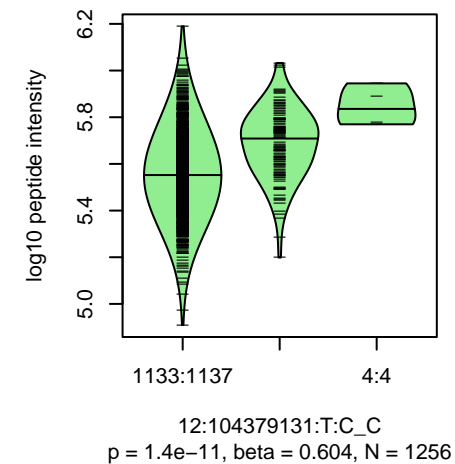**P14625 NP2**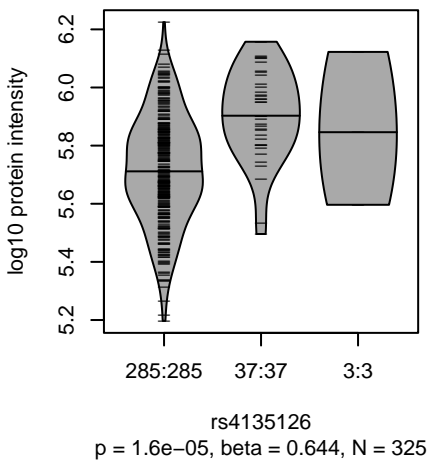**AQAYQTGK pc2**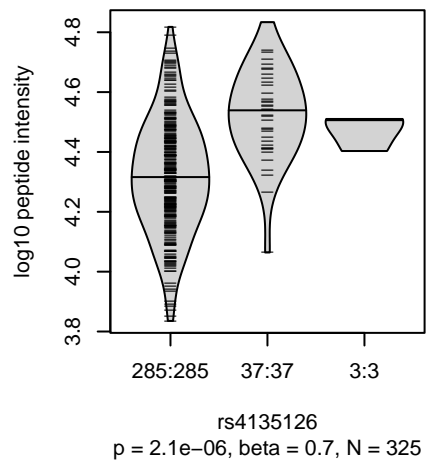**EFEPLLNWMK pc2**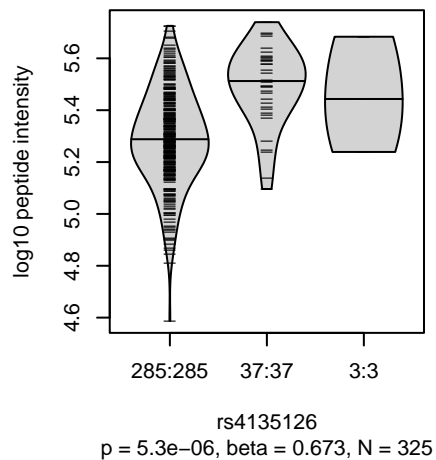**SILFVPTSAPR pc2**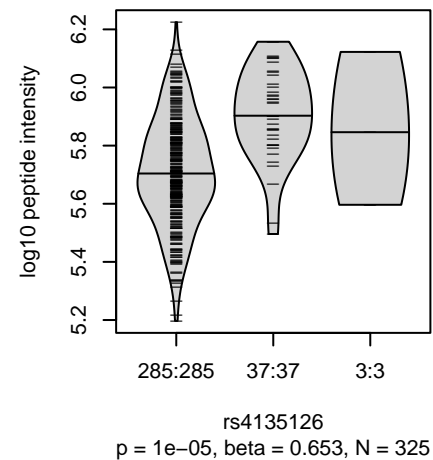**YNDTFWK pc2**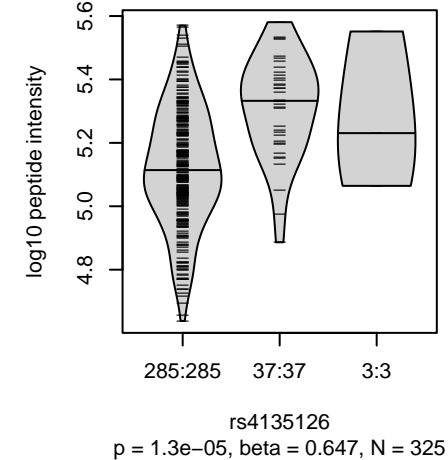

Locus: 217 (Sort: 245)

Status: Replicated

80% power: No

SNP: 12:104379131:T:C

rsID: rs4135126

UniProtID: P14625

HGNC gene: HSP90B1

Type: Cis-pQTL

**HLA-B [cis]**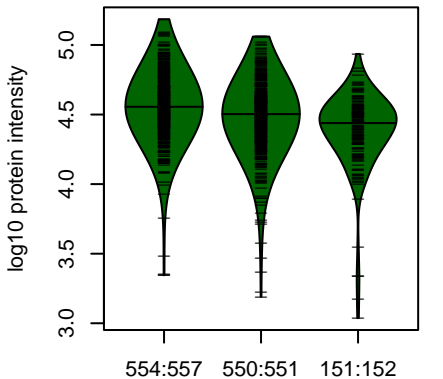

6:29896659:C:T\_T  
p = 1.6e-11, beta = -0.277, N = 1255

**DYIALNEDLR pc2**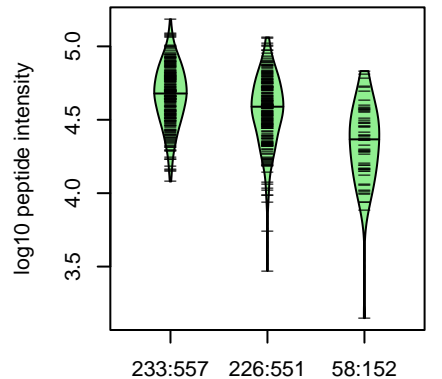

6:29896659:C:T\_T  
p = 2.2e-12, beta = -0.447, N = 517

**FSDAASPR pc2**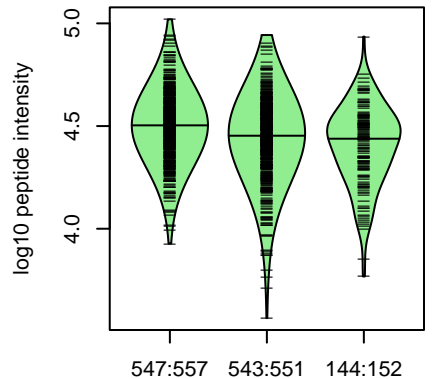

6:29896659:C:T\_T  
p = 1.1e-07, beta = -0.223, N = 1234

**DGEDQTQDTELVETRPAGDR pc3**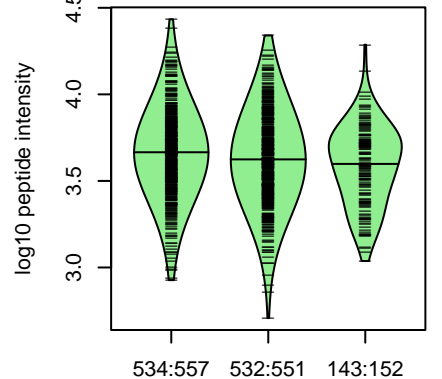

6:29896659:C:T\_T  
p = 0.00091, beta = -0.14, N = 1209

**SWTAADTAAQITQR pc2**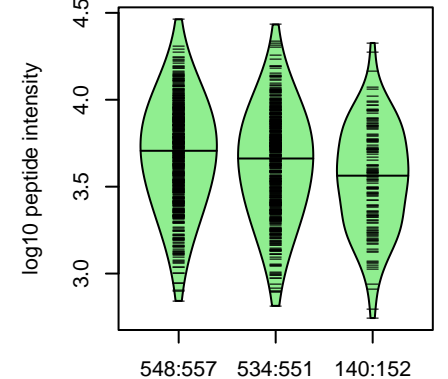

6:29896659:C:T\_T  
p = 0.0037, beta = -0.123, N = 1222

**P01889 NP2**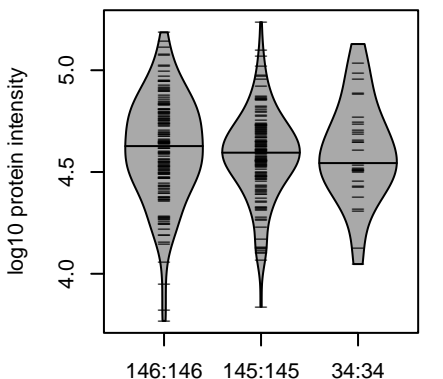

rs2517755  
p = 0.56, beta = -0.0489, N = 325

**YTCHVQHEGLPK pc3**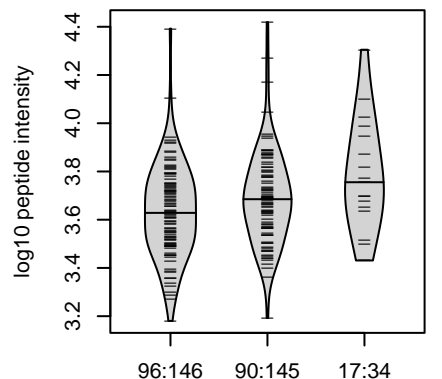

rs2517755  
p = 0.0023, beta = 0.327, N = 203

**DYIALNEDLR pc2**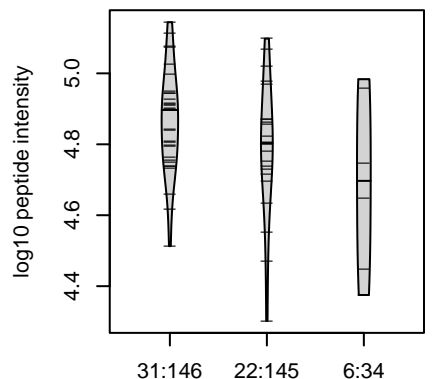

rs2517755  
p = 0.079, beta = -0.325, N = 59

**APWIEQEGPEYWDR pc2**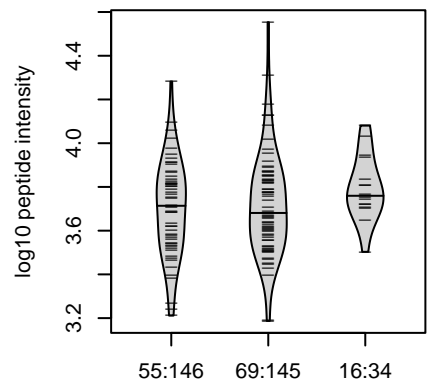

rs2517755  
p = 0.15, beta = 0.18, N = 140

**DGEDQTQDTELVETRPAGDR pc3**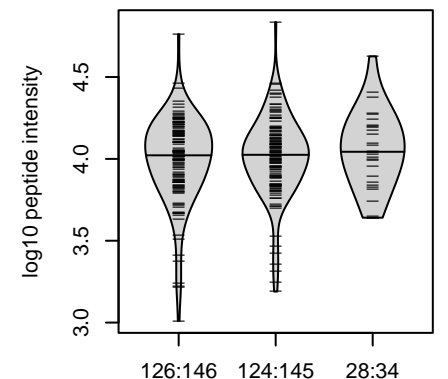

rs2517755  
p = 0.27, beta = 0.0999, N = 278

**GEPRFISGVYDDTQFVR pc3  
rs1050437 REF**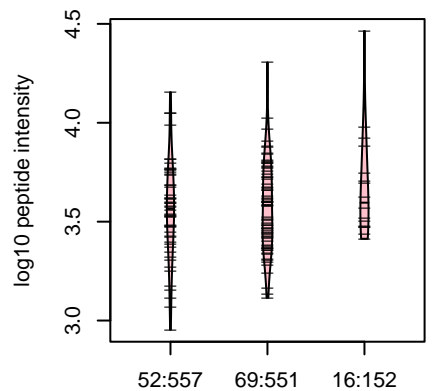

6:29896659:C:T\_T  
p = 0.12, model = REC, N = 137

**FISVGYVDDTQFVR pc2  
rs1050437 REF**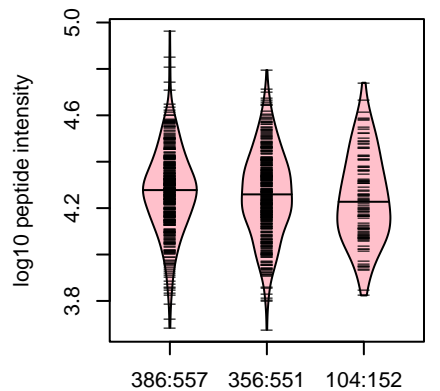

6:29896659:C:T\_T  
p = 0.15, model = REC, N = 846

**WAAVVVPSGEEQR pc2  
rs707908;rs1736924 ALT**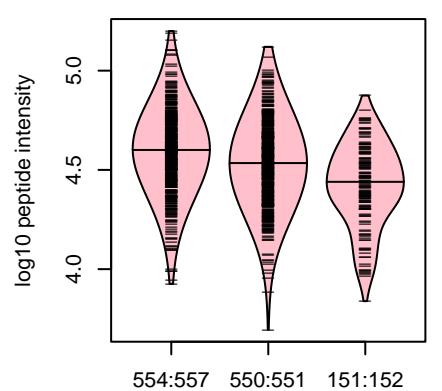

6:29896659:C:T\_T  
p = 0.47, model = DOM, N = 1255

Locus: 218 (Sort: 246)  
Status: Not replicated  
80% power: No  
SNP: 6:29896659:C:T  
rsID: rs2517755  
UniProtID: P01889  
HGNC gene: HLA-B  
Type: Cis-pQTL

**FXVD2 [cis]**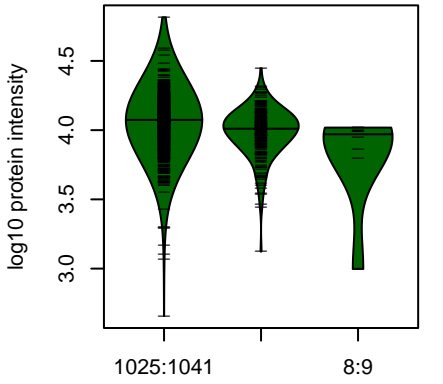

11:117698483:A:G\_G  
 $p = 1.7e-11$ ,  $\beta = -0.474$ ,  $N = 1237$

**TGLSMDGGGSPK pc2**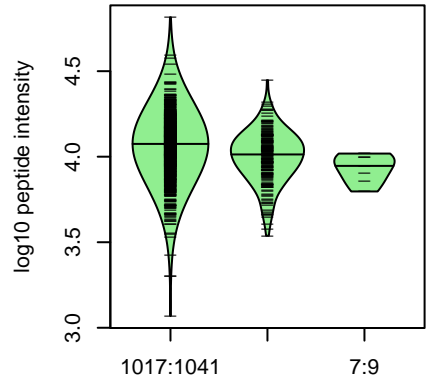

11:117698483:A:G\_G  
 $p = 1.3e-09$ ,  $\beta = -0.436$ ,  $N = 1222$

**GDVDPFYDYETVR pc2**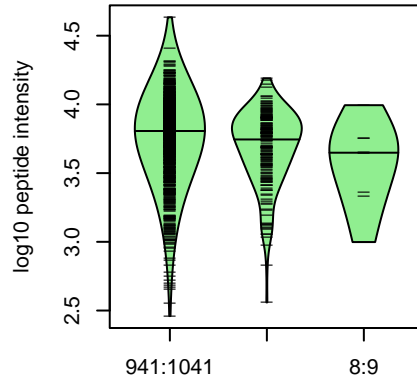

11:117698483:A:G\_G  
 $p = 3.4e-05$ ,  $\beta = -0.303$ ,  $N = 1138$

**P54710 NP2**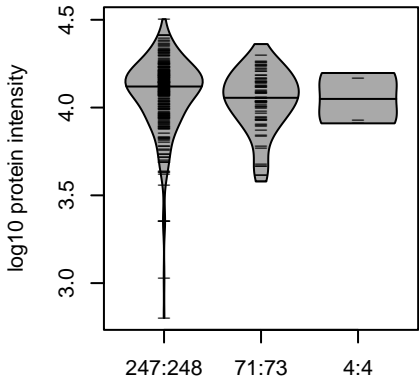

rs11216567  
 $p = 0.14$ ,  $\beta = -0.178$ ,  $N = 322$

**TGLSMDGGGSPK pc2**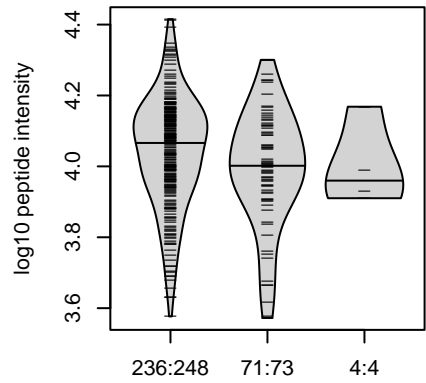

rs11216567  
 $p = 0.059$ ,  $\beta = -0.228$ ,  $N = 311$

**GDVDPFYDYETVR pc2**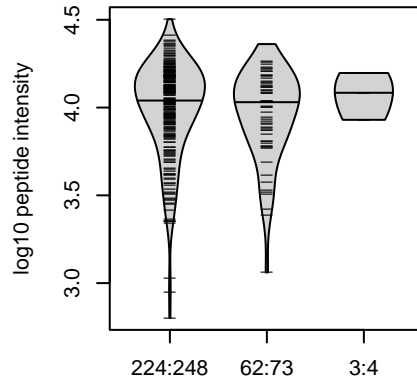

rs11216567  
 $p = 0.45$ ,  $\beta = -0.0973$ ,  $N = 289$

Locus: 219 (Sort: 247)  
 Status: Not replicated  
 80% power: No  
 SNP: 11:117698483:A:G  
 rsID: rs11216567  
 UniProtID: P54710  
 HGNC gene: FXVD2  
 Type: Cis-pQTL

### HLA-G [cis]

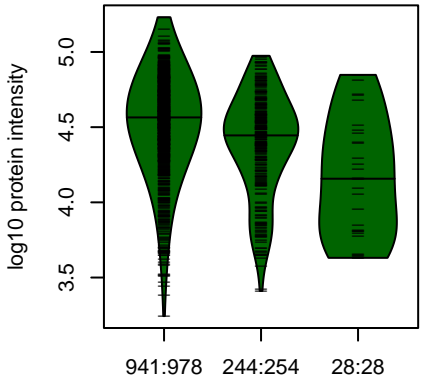

6:29924440:T:C\_C  
p = 1.8e-11, beta = -0.395, N = 1213

### DYLALNEDLR pc2

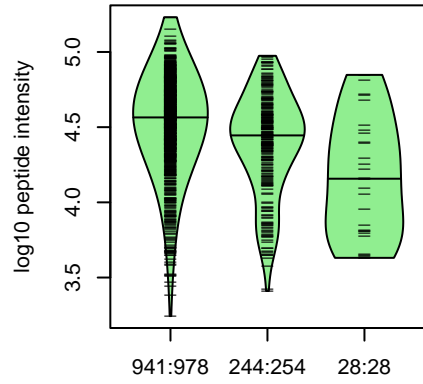

6:29924440:T:C\_C  
p = 1.8e-11, beta = -0.395, N = 1213

### Q5RJ85 NP1

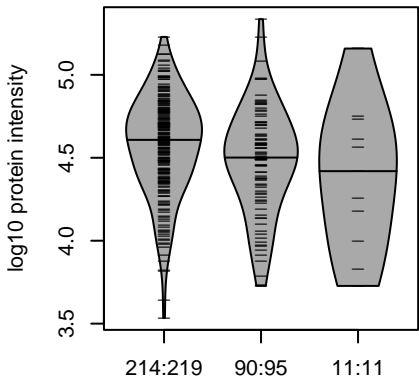

rs17179851  
p = 0.0089, beta = -0.267, N = 315

### DYLALNEDLR pc2

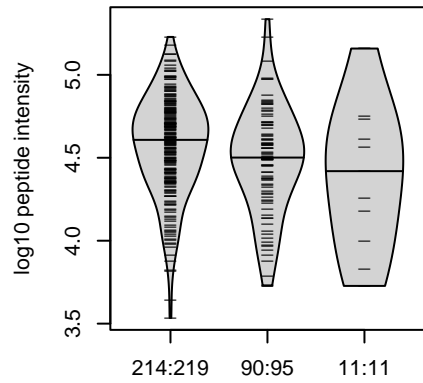

rs17179851  
p = 0.0066, beta = -0.275, N = 315

Locus: 220 (Sort: 248)  
Status: Not replicated  
80% power: No  
SNP: 6:29924440:T:C  
rsID: rs17179851  
UniProtID: Q5RJ85  
HGNC gene: HLA-G  
Type: Cis-pQTL

### WAAVVPSGEEQR pc2 rs707908;rs1736924 ALT

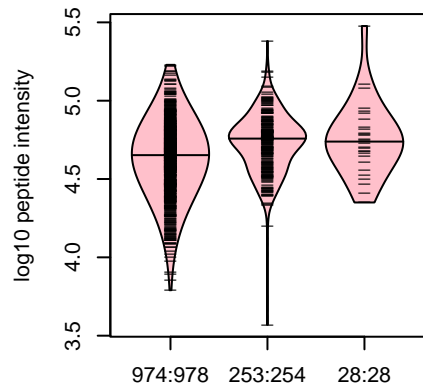

6:29924440:T:C\_C  
p = 1, model = DOM, N = 1255

**LAMC1 [trans]**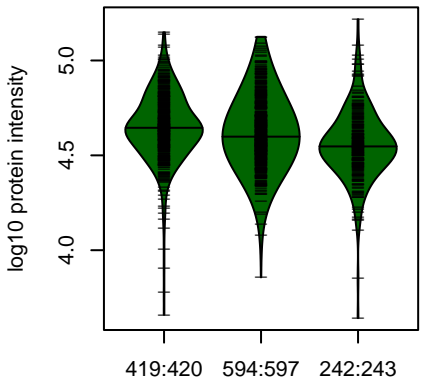

1:236211491:C:T\_T  
 $p = 1.8e-11$ ,  $\beta = -0.263$ ,  $N = 1255$

**TAAEEALR pc2**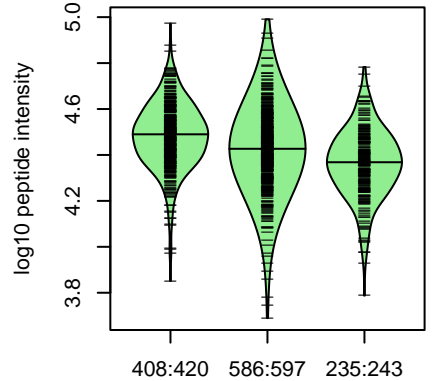

1:236211491:C:T\_T  
 $p = 2.5e-23$ ,  $\beta = -0.391$ ,  $N = 1229$

**TEQQTADQLLAR pc2**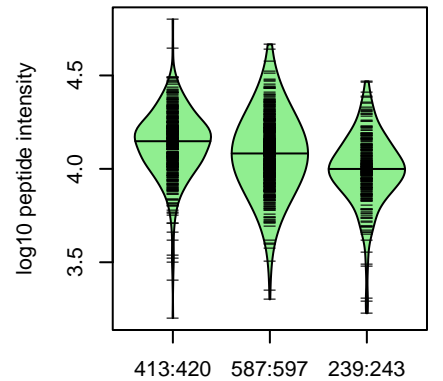

1:236211491:C:T\_T  
 $p = 6.8e-22$ ,  $\beta = -0.375$ ,  $N = 1239$

**LNTFGDEVFNPK pc2**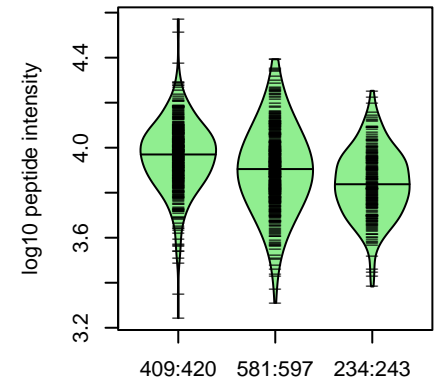

1:236211491:C:T\_T  
 $p = 9.6e-22$ ,  $\beta = -0.377$ ,  $N = 1224$

**LSAEDLVLEGAGLR pc2**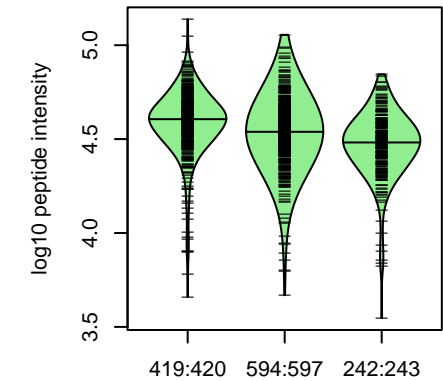

1:236211491:C:T\_T  
 $p = 1.7e-21$ ,  $\beta = -0.369$ ,  $N = 1255$

**P11047 NP2**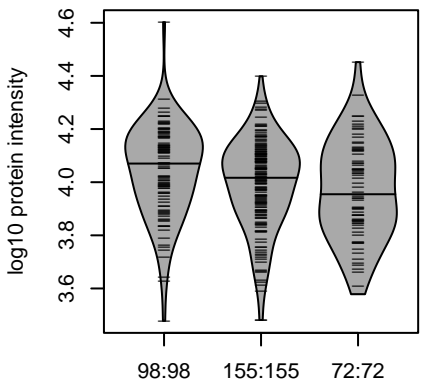

rs4660150  
 $p = 0.12$ ,  $\beta = -0.121$ ,  $N = 325$

**TEQQTADQLLAR pc2**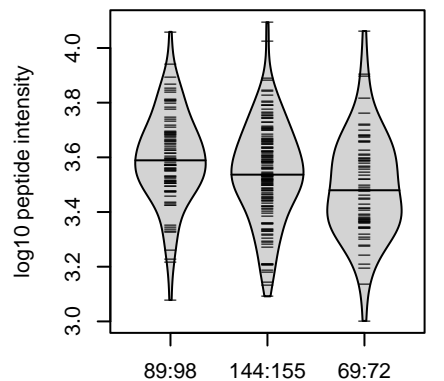

rs4660150  
 $p = 0.014$ ,  $\beta = -0.193$ ,  $N = 302$

**LNEIEGTLNK pc2**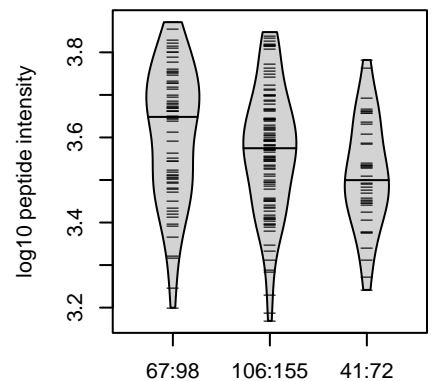

rs4660150  
 $p = 0.015$ ,  $\beta = -0.233$ ,  $N = 214$

**AFDITYVR pc2**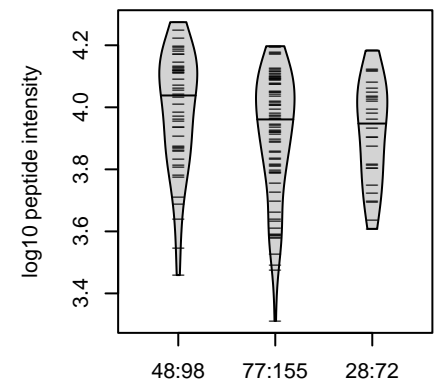

rs4660150  
 $p = 0.076$ ,  $\beta = -0.202$ ,  $N = 153$

**QDIAVISDSYFPR pc2**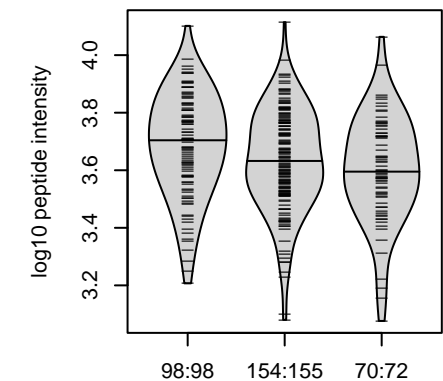

rs4660150  
 $p = 0.091$ ,  $\beta = -0.13$ ,  $N = 322$

**ACNCNPYGTMK pc2  
rs20558 ALT**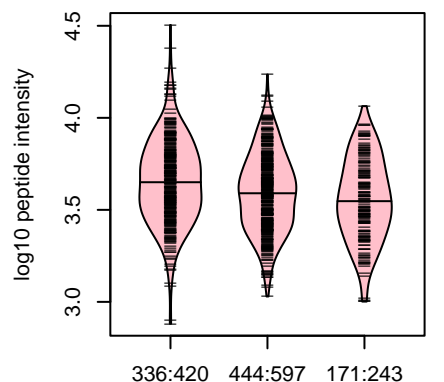

1:236211491:C:T\_T  
 $p = 0.0083$ ,  $\text{model} = \text{REC}$ ,  $N = 951$

**ACNCNLYGTMK pc2  
rs20558 REF**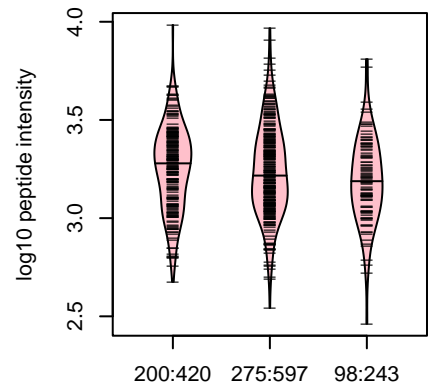

1:236211491:C:T\_T  
 $p = 0.074$ ,  $\text{model} = \text{DOM}$ ,  $N = 573$

Locus: 221 (Sort: 249)  
 Status: Not replicated  
 80% power: No  
 SNP: 1:236211491:C:T  
 rsID: rs4660150  
 UniProtID: P11047  
 HGNC gene: LAMC1  
 Type: Trans-pQTL

**RNASE3 [cis]**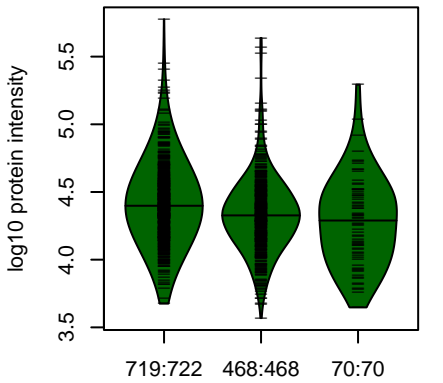

14:21426161:G:A\_A  
 $p = 2.1e-11$ ,  $\beta = -0.311$ ,  $N = 1257$

**YPVVPVHLDTTI pc2**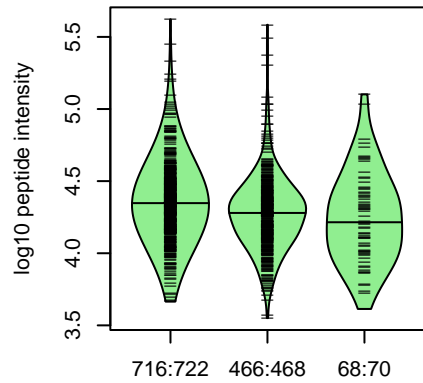

14:21426161:G:A\_A  
 $p = 1.1e-09$ ,  $\beta = -0.285$ ,  $N = 1250$

**AQWFAIQHISLNPPR pc3**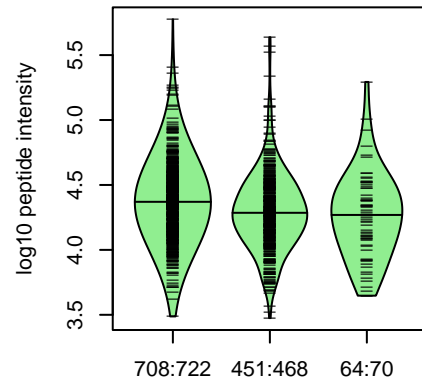

14:21426161:G:A\_A  
 $p = 4.8e-09$ ,  $\beta = -0.278$ ,  $N = 1223$

**TTFANVVNVCGNQSIR pc2**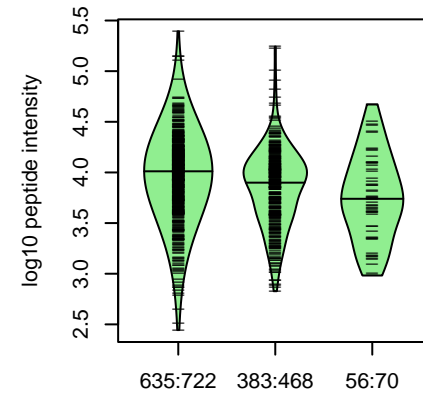

14:21426161:G:A\_A  
 $p = 4.1e-08$ ,  $\beta = -0.279$ ,  $N = 1074$

**FYVVACDNR pc2**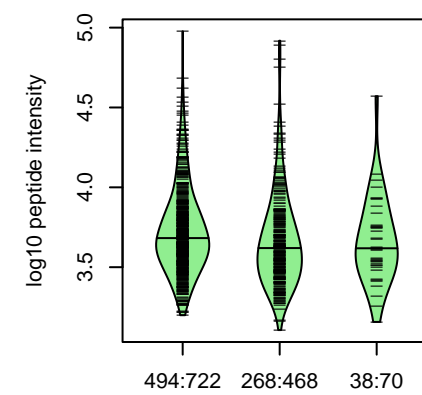

14:21426161:G:A\_A  
 $p = 0.00026$ ,  $\beta = -0.219$ ,  $N = 800$

**P12724 NP4**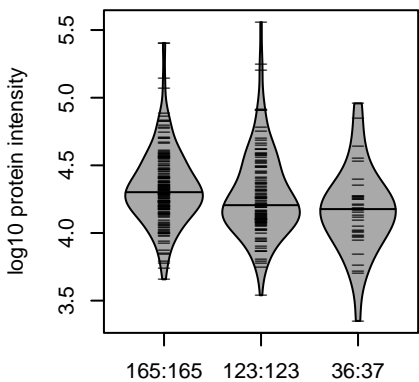

rs2771312  
 $p = 0.0022$ ,  $\beta = -0.245$ ,  $N = 324$

**TTFANVVNVCGNQSIR pc2**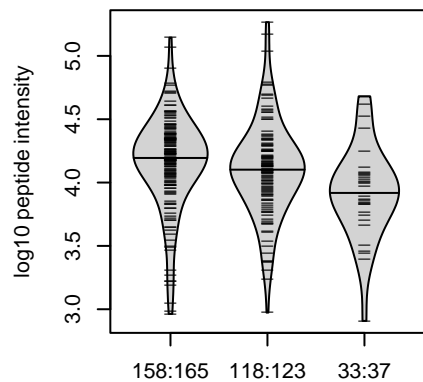

rs2771312  
 $p = 0.004$ ,  $\beta = -0.238$ ,  $N = 309$

**YPVVPVHLDTTI pc2**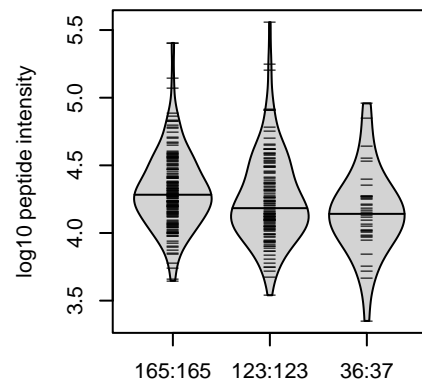

rs2771312  
 $p = 0.0045$ ,  $\beta = -0.228$ ,  $N = 324$

**AQWFAIQHISLNPPR pc3**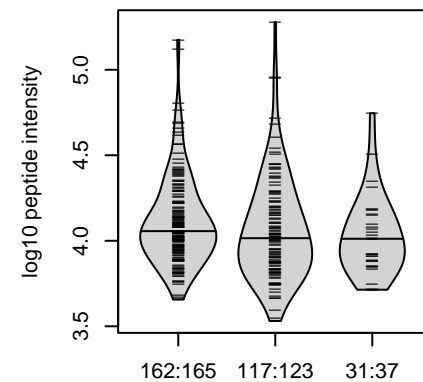

rs2771312  
 $p = 0.013$ ,  $\beta = -0.207$ ,  $N = 310$

Locus: 222 (Sort: 250)

Status: Not replicated

80% power: No

SNP: 14:21426161:G:A

rsID: rs2771312

UniProtID: P12724

HGNC gene: RNASE3

Type: Cis-pQTL



**CCL18 [cis]**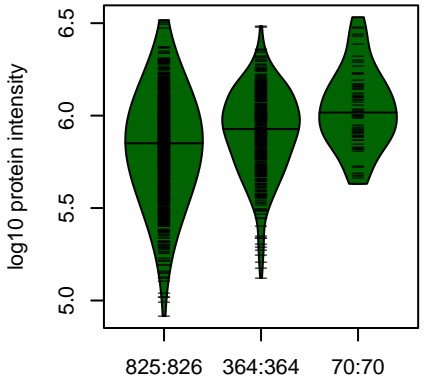

17:34389361:G:A\_G  
 $p = 2.3e-11$ ,  $\beta = 0.314$ ,  $N = 1259$

**QICADPNK pc2**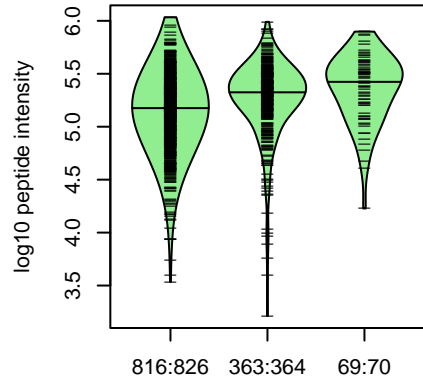

17:34389361:G:A\_G  
 $p = 5.5e-15$ ,  $\beta = 0.367$ ,  $N = 1248$

**QICADPNKK pc2**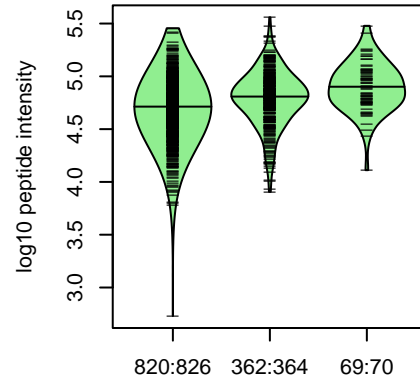

17:34389361:G:A\_G  
 $p = 3.2e-13$ ,  $\beta = 0.343$ ,  $N = 1251$

**PGVILLTK pc2**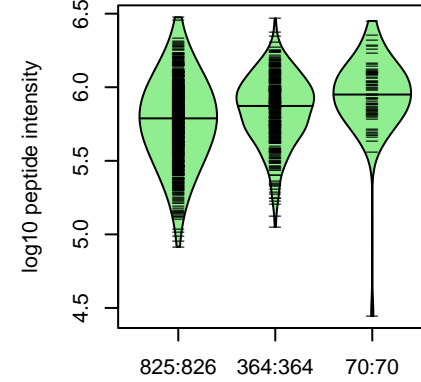

17:34389361:G:A\_G  
 $p = 4.3e-12$ ,  $\beta = 0.325$ ,  $N = 1259$

**FIVDYSETSPQCPK pc2**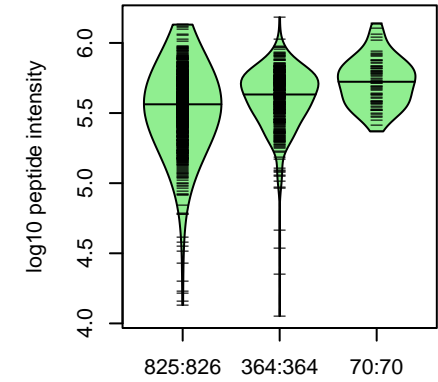

17:34389361:G:A\_G  
 $p = 1.8e-11$ ,  $\beta = 0.315$ ,  $N = 1259$

**P55774 NP4**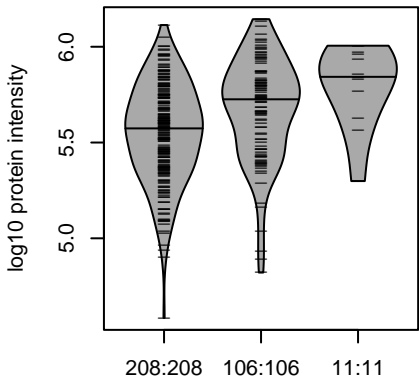

rs854469  
 $p = 9.5e-07$ ,  $\beta = 0.477$ ,  $N = 325$

**FIVDYSETSPQCPK pc2**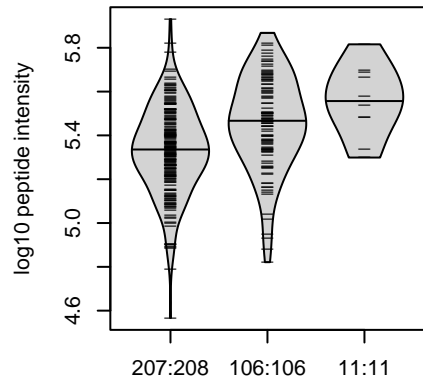

rs854469  
 $p = 6.1e-10$ ,  $\beta = 0.596$ ,  $N = 324$

**ELCCLVYTSWQIPQK pc3**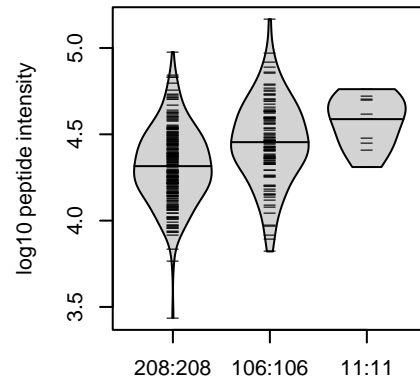

rs854469  
 $p = 6.8e-10$ ,  $\beta = 0.594$ ,  $N = 325$

**QICADPNK pc2**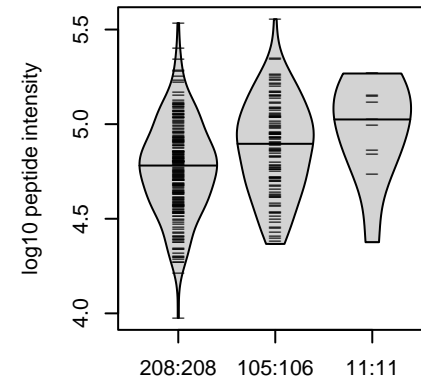

rs854469  
 $p = 3.7e-06$ ,  $\beta = 0.452$ ,  $N = 324$

**PGVILLTK pc2**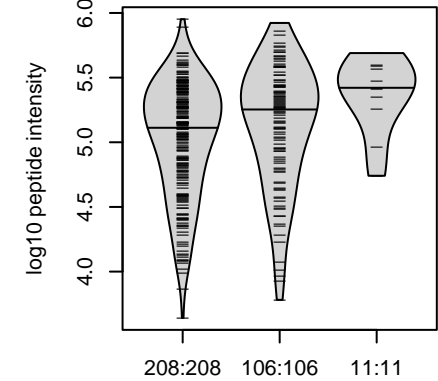

rs854469  
 $p = 0.00011$ ,  $\beta = 0.38$ ,  $N = 325$

Locus: 223 (Sort: 251)

Status: Replicated

80% power: No

SNP: 17:34389361:G:A

rsID: rs854469

UniProtID: P55774

HGNC gene: CCL18

Type: Cis-pQTL

**HP [cis]**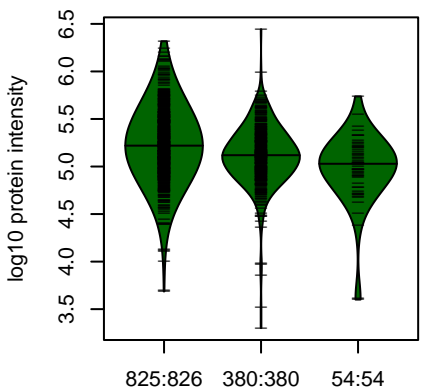

16:72285039:A:C\_C  
 $p = 2.3e-11$ ,  $\beta = -0.327$ ,  $N = 1259$

**VTSIQDWVQK pc2**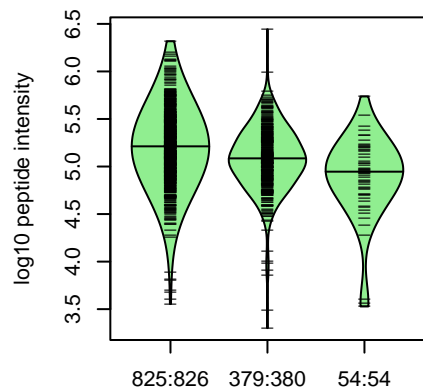

16:72285039:A:C\_C  
 $p = 1.5e-12$ ,  $\beta = -0.346$ ,  $N = 1258$

**LPECEAVCGK pc2**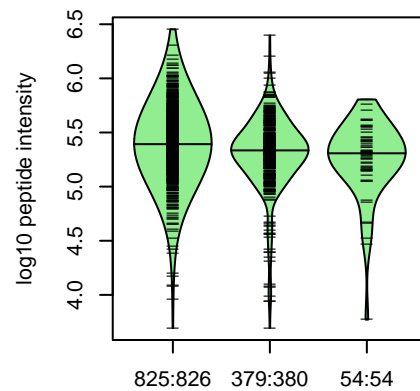

16:72285039:A:C\_C  
 $p = 5.7e-07$ ,  $\beta = -0.246$ ,  $N = 1258$

**TEGDGVYTLNNEK pc2**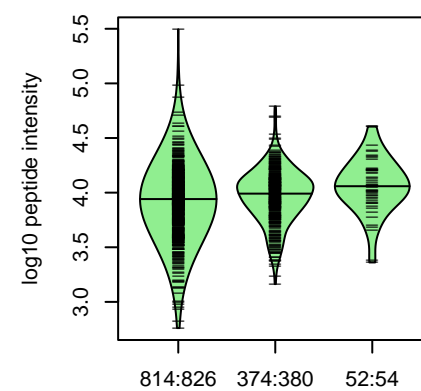

16:72285039:A:C\_C  
 $p = 1.2e-05$ ,  $\beta = 0.218$ ,  $N = 1240$

**TEGDGVYTLNDKK pc3**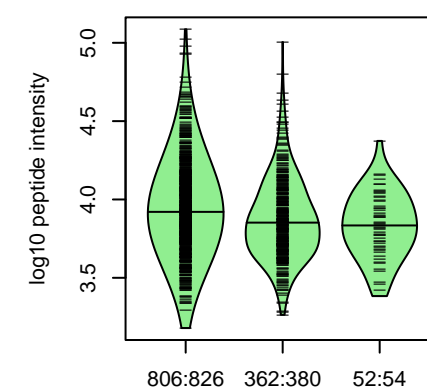

16:72285039:A:C\_C  
 $p = 6.4e-05$ ,  $\beta = -0.2$ ,  $N = 1220$

**P00738 NP4**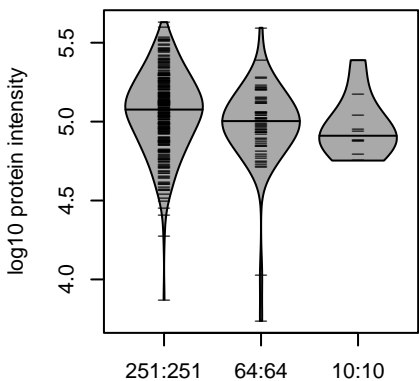

rs62058280  
 $p = 0.021$ ,  $\beta = -0.254$ ,  $N = 325$

**VTSIQDWVQK pc2**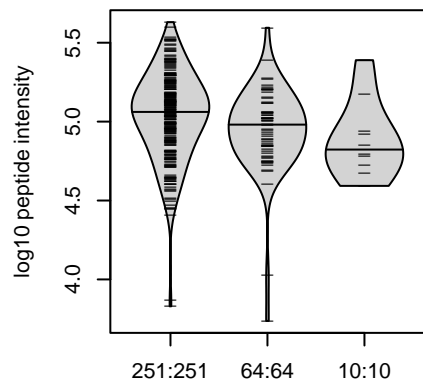

rs62058280  
 $p = 0.0035$ ,  $\beta = -0.316$ ,  $N = 325$

**NPANPVQR pc2**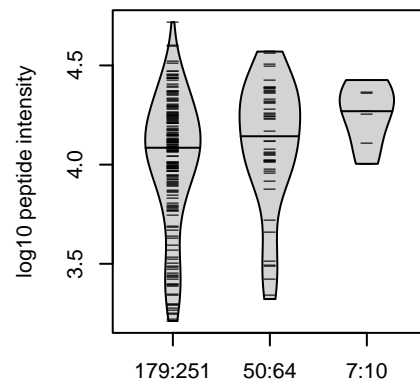

rs62058280  
 $p = 0.011$ ,  $\beta = 0.32$ ,  $N = 236$

**LPECEAVCGKPK pc2**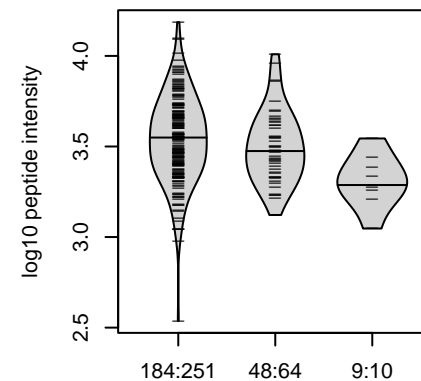

rs62058280  
 $p = 0.011$ ,  $\beta = -0.305$ ,  $N = 241$

**TEGDGVYTLNNEK pc2**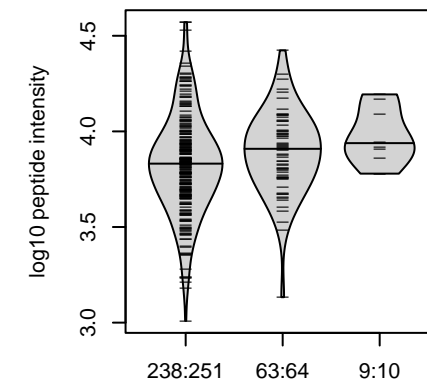

rs62058280  
 $p = 0.025$ ,  $\beta = 0.25$ ,  $N = 310$

Locus: 224 (Sort: 252)

Status: Not replicated

80% power: No

SNP: 16:72285039:A:C

rsID: rs62058280

UniProtID: P00738

HGNC gene: HP

Type: Cis-pQTL
