# Supplementary material for: A genome-wide association study of mass spectrometry proteomics using the Seer Proteograph platform
Source: PubMed Central journal article supplement (PMC11160678; doi:10.1101/2024.05.27.596028), 2024-06-01
Supplement: media-3.pdf [file media-3.pdf]

**HDGF : NP2  
P51858**

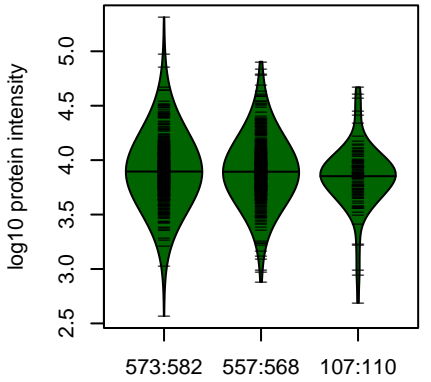

1:156711623:C:A\_A  
p = 0.25, beta = -0.0508, N = 1237

**EAENPEGEEK pc2  
P51858-2;P51858-3;P51858**

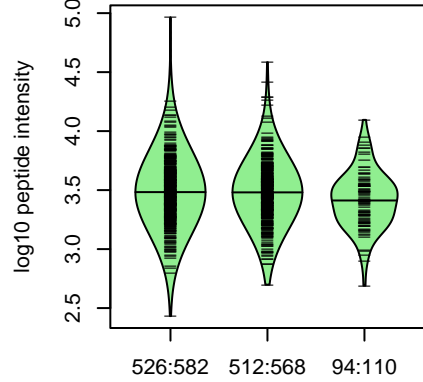

1:156711623:C:A\_A  
p = 0.053, beta = -0.0901, N = 1132

**YQVFFFGTHETAFLGPK pc3  
P51858-2;P51858-3;P51858**

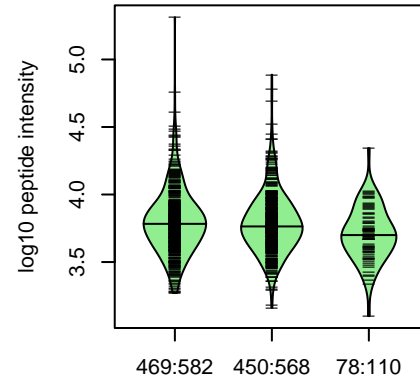

1:156711623:C:A\_A  
p = 0.032, beta = -0.107, N = 997

**EAATLEVERPLPMEVEK pc3  
P51858-2;P51858-3;P51858**

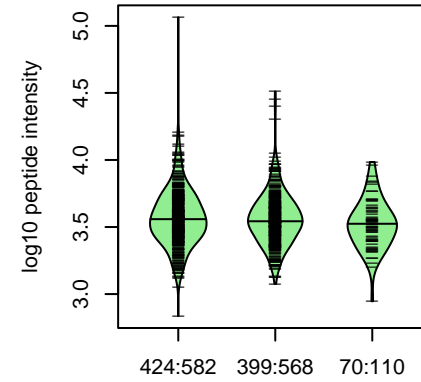

1:156711623:C:A\_A  
p = 0.26, beta = -0.0596, N = 893

**AGDLLDSPK pc2  
P51858-2;P51858-3;P51858**

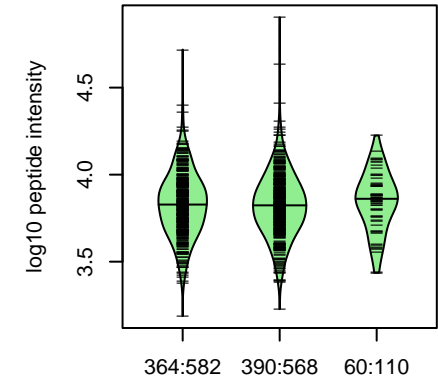

1:156711623:C:A\_A  
p = 0.9, beta = 0.0069, N = 814

**HDGF : NP2  
P51858**

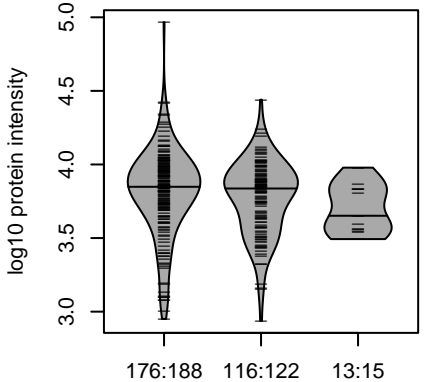

1:156711623:C:A\_A  
p = 0.067, beta = -0.179, N = 305

**YQVFFFGTHETAFLGPK pc3  
P51858-2;P51858-3;P51858**

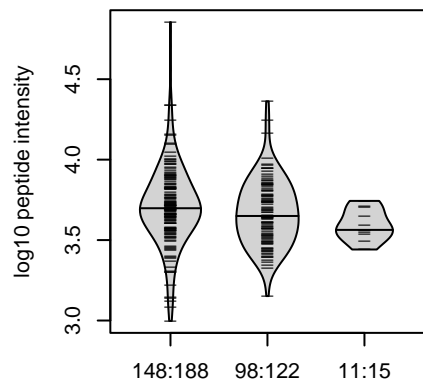

1:156711623:C:A\_A  
p = 0.044, beta = -0.213, N = 257

**EAATLEVERPLPMEVEK pc3  
P51858-2;P51858-3;P51858**

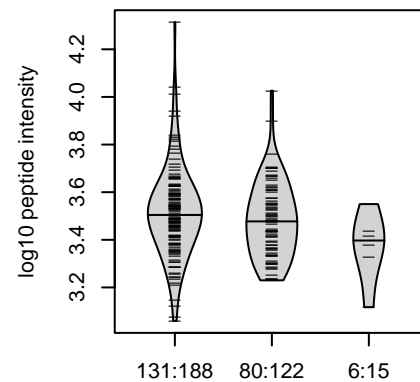

1:156711623:C:A\_A  
p = 0.053, beta = -0.236, N = 217

**DLPFYEEK pc2  
P51858-2;P51858-3;P51858**

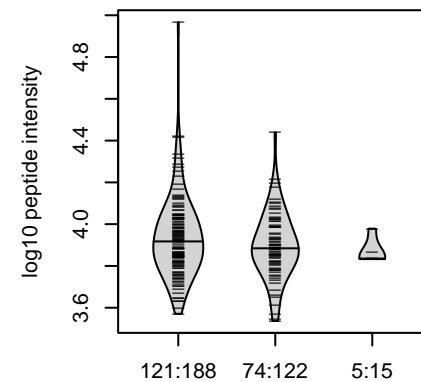

1:156711623:C:A\_A  
p = 0.25, beta = -0.149, N = 200

**EAENPEGEEK pc2  
P51858-2;P51858-3;P51858**

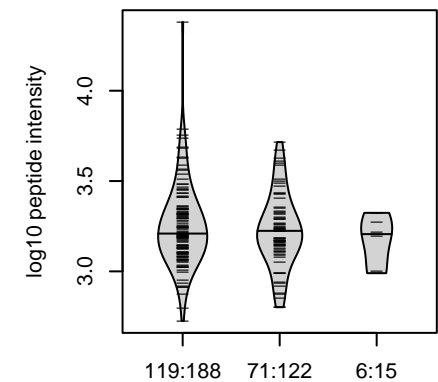

1:156711623:C:A\_A  
p = 0.38, beta = -0.111, N = 196

**NSTLSEPGSGR pc2  
rs4399146 ALT**

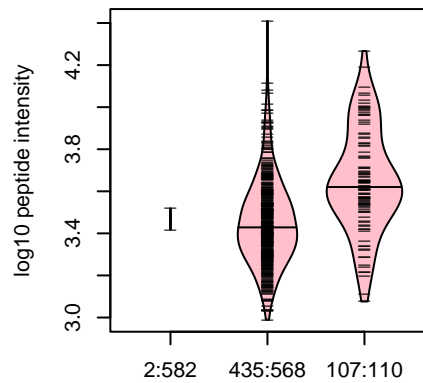

1:156711623:C:A\_A  
p = 8.7e-222, model = REC, N = 544

**NSTPSEPGSGR pc2  
rs4399146 REF**

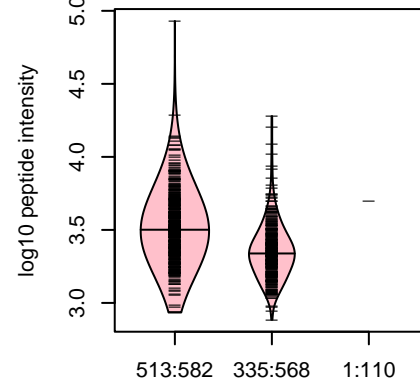

1:156711623:C:A\_A  
p = 1.3e-56, model = DOM, N = 849

Assay Target: HDGF  
Olink UniProt: P51858  
UKB rsID: rs3806417  
Proxy rsID: rs3806417  
UKB SNP: 1:156711623:C:A  
Proxy SNP: 1:156711623:C:A  
UKB log10(p): 6757.8  
UKB BETA: 1.155  
-----  
1132:997:893:814:787:637:547:

**APOBR : NP2  
Q0VD83**

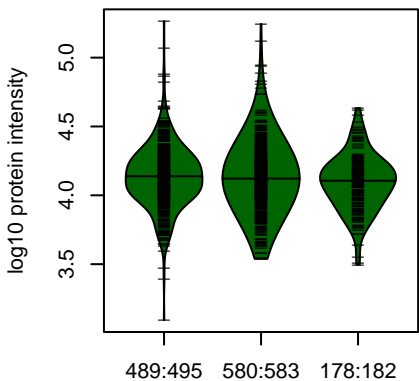

16:28508048:A:G\_G  
p = 0.066, beta = -0.0754, N = 1247

**AILDGEEAR pc2  
Q0VD83**

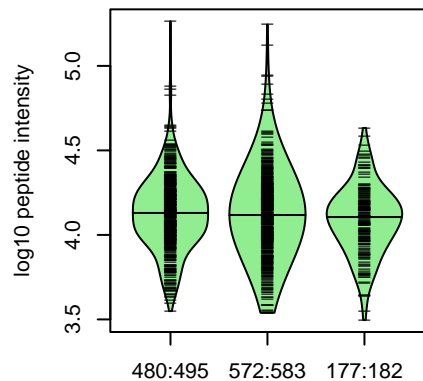

16:28508048:A:G\_G  
p = 0.13, beta = -0.0622, N = 1229

**QTEYGAVPGER pc2  
Q0VD83**

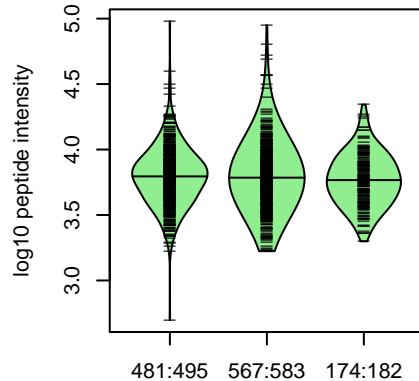

16:28508048:A:G\_G  
p = 0.34, beta = -0.0392, N = 1222

**GSQVEAFESR pc2  
Q0VD83**

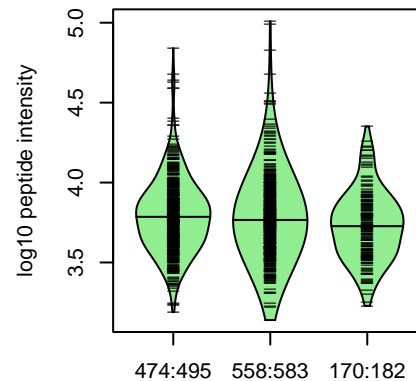

16:28508048:A:G\_G  
p = 0.011, beta = -0.106, N = 1202

**EAGEVELMGVLALSK pc2  
Q0VD83**

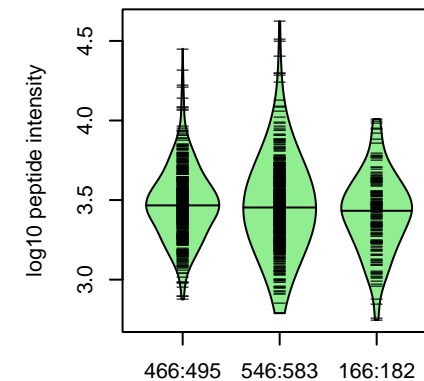

16:28508048:A:G\_G  
p = 0.015, beta = -0.103, N = 1178

**APOBR : NP2  
Q0VD83**

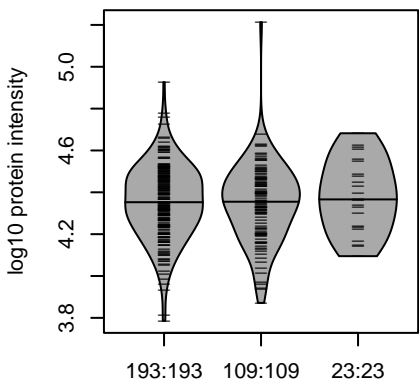

16:28508048:A:G\_G  
p = 0.84, beta = 0.0181, N = 325

**EEADLLGVR pc2  
Q0VD83**

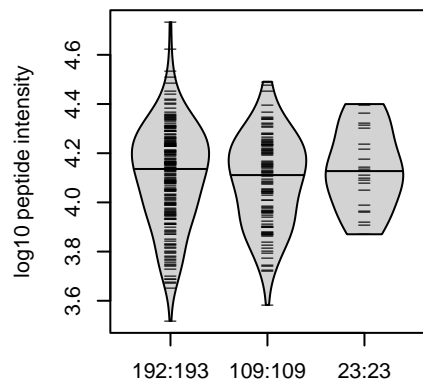

16:28508048:A:G\_G  
p = 0.85, beta = -0.0169, N = 324

**QTEYGAVPGER pc2  
Q0VD83**

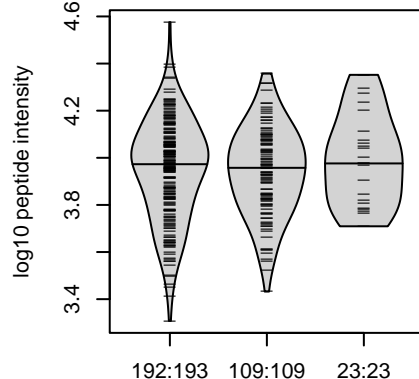

16:28508048:A:G\_G  
p = 0.65, beta = 0.0393, N = 324

**AILDGEEAR pc2  
Q0VD83**

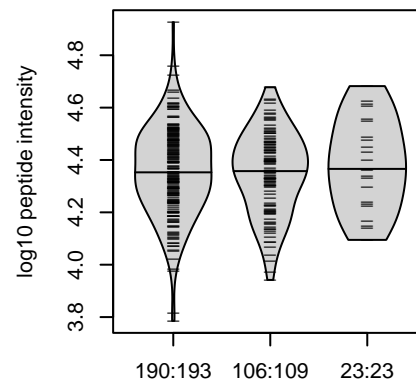

16:28508048:A:G\_G  
p = 0.81, beta = 0.021, N = 319

**GSQVEAFESR pc2  
Q0VD83**

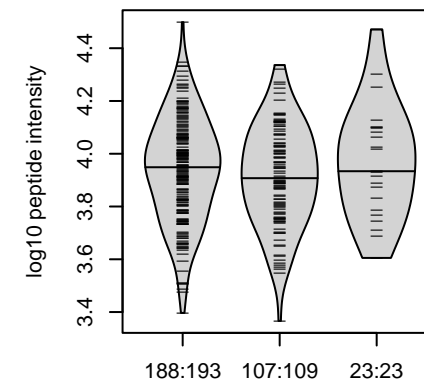

16:28508048:A:G\_G  
p = 0.89, beta = -0.0124, N = 318

**QAQVLGTER pc2  
rs180743 ALT**

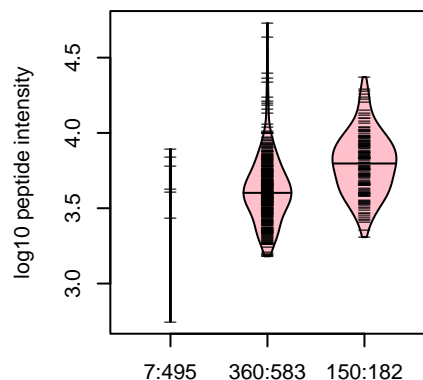

16:28508048:A:G\_G  
p = 2.4e-144, model = REC, N = 517

**QPQVLGTER pc2  
rs180743 REF**

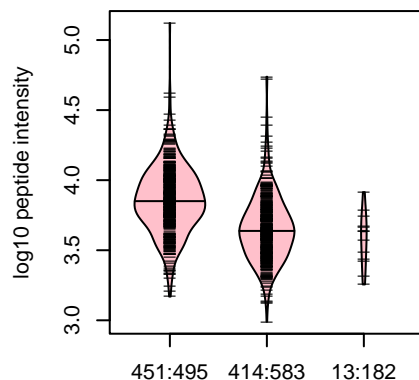

16:28508048:A:G\_G  
p = 2.9e-84, model = DOM, N = 878

Assay Target: APOBR  
Olink UniProt: Q0VD83  
UKB rsID: rs180744  
Proxy rsID: rs180744  
UKB SNP: 16:28508048:A:G  
Proxy SNP: 16:28508048:A:G  
UKB log10(p): 6743.3  
UKB BETA: -1.118  
-----\*-----  
1229:1222:1202:1178:1153:113

**F12 : NP2  
P00748**

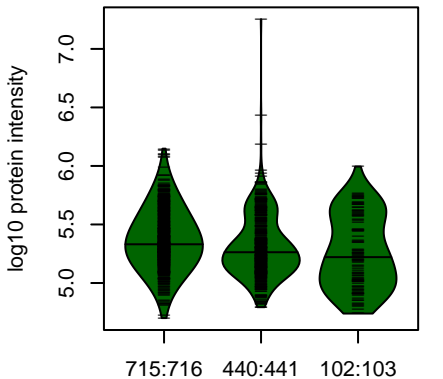

5:176836532:A:G\_A  
p = 2.1e-10, beta = -0.276, N = 1257

**AAEHTVVLTVTGEPCHFPFQYHR pc  
P00748**

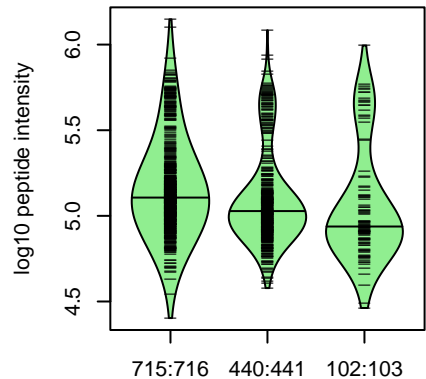

5:176836532:A:G\_A  
p = 1.8e-13, beta = -0.319, N = 1257

**CFEPQLLR pc2  
P00748**

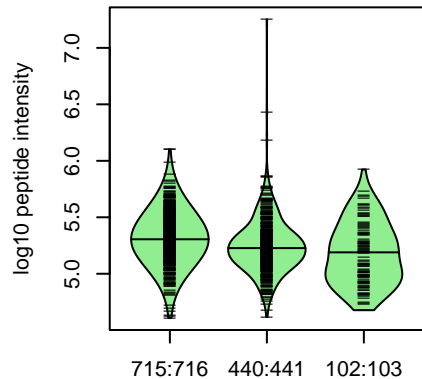

5:176836532:A:G\_A  
p = 5.1e-13, beta = -0.313, N = 1257

**LHEAFSPVSYQHDLALLR pc4  
P00748**

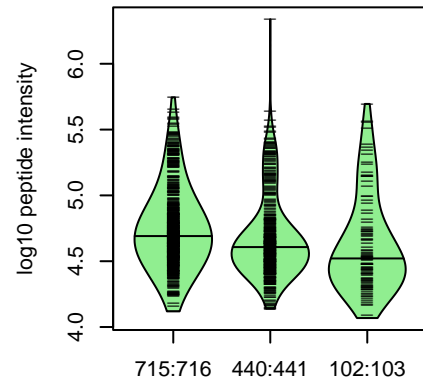

5:176836532:A:G\_A  
p = 1.4e-13, beta = -0.32, N = 1257

**VVGGVALR pc2  
P00748**

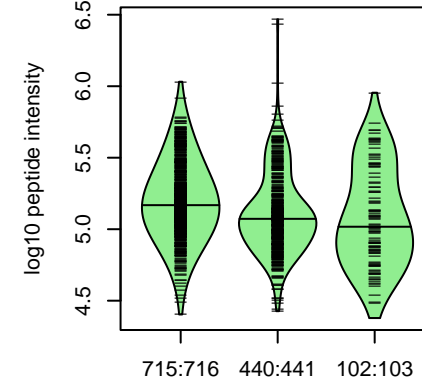

5:176836532:A:G\_A  
p = 7.5e-11, beta = -0.283, N = 1257

**F12 : NP2  
P00748**

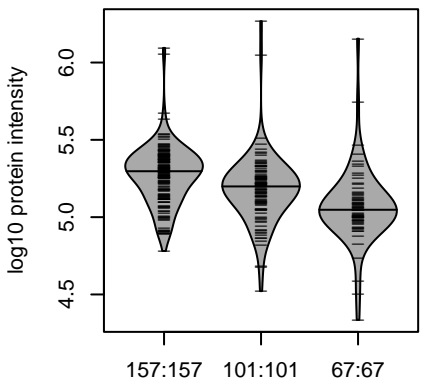

5:176836532:A:G\_A  
p = 4.7e-05, beta = -0.281, N = 325

**AAEHTVVLTVTGEPCHFPFQYHR pc  
P00748**

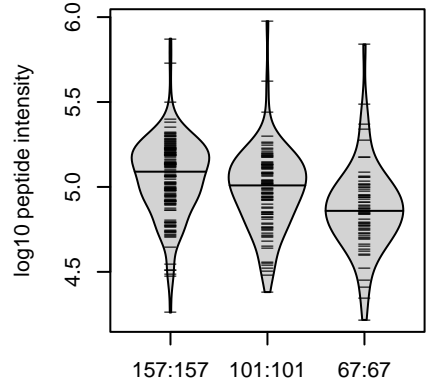

5:176836532:A:G\_A  
p = 0.016, beta = -0.168, N = 325

**CFEPQLLR pc2  
P00748**

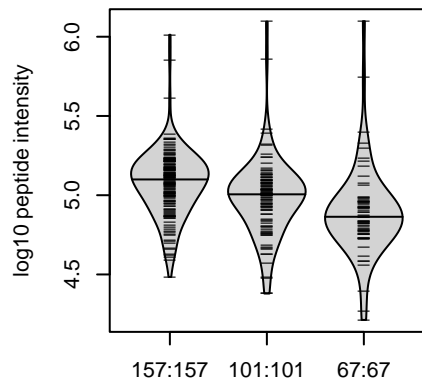

5:176836532:A:G\_A  
p = 0.00041, beta = -0.245, N = 325

**EQPPSLTR pc2  
P00748**

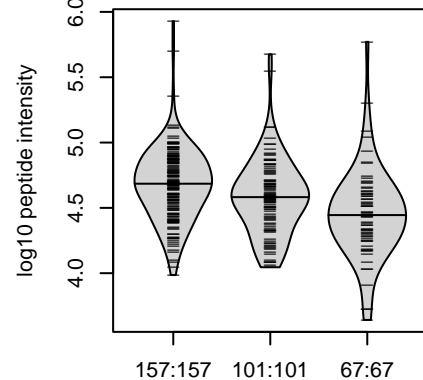

5:176836532:A:G\_A  
p = 0.0045, beta = -0.198, N = 325

**LHEAFSPVSYQHDLALLR pc4  
P00748**

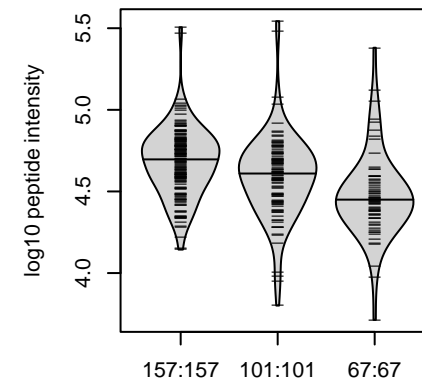

5:176836532:A:G\_A  
p = 0.0027, beta = -0.209, N = 325

Assay Target: F12  
Olink UniProt: P00748  
UKB rsID: rs1801020  
Proxy rsID: rs1801020  
UKB SNP: 5:176836532:A:G  
Proxy SNP: 5:176836532:A:G  
UKB log10(p): 6066.9  
UKB BETA: 1.167  
\*\*\*\*\*  
1257:1257:1257:1257:1256:125

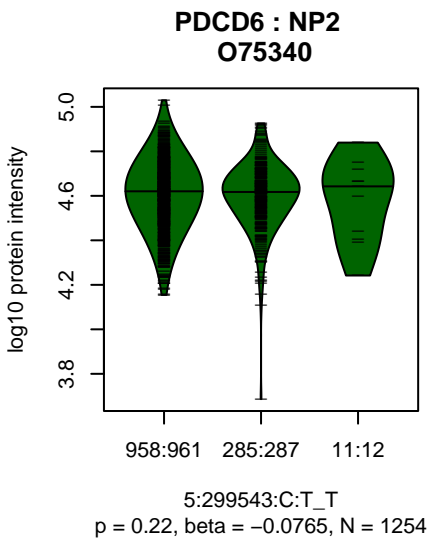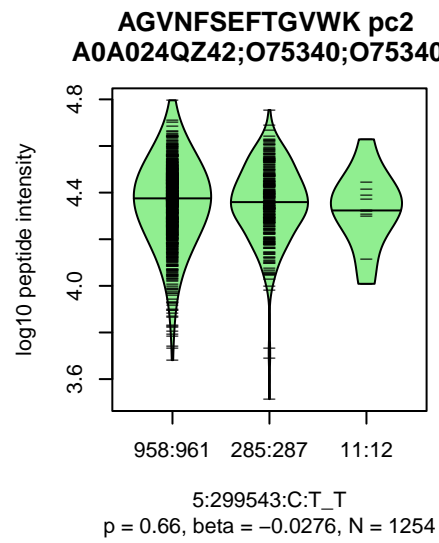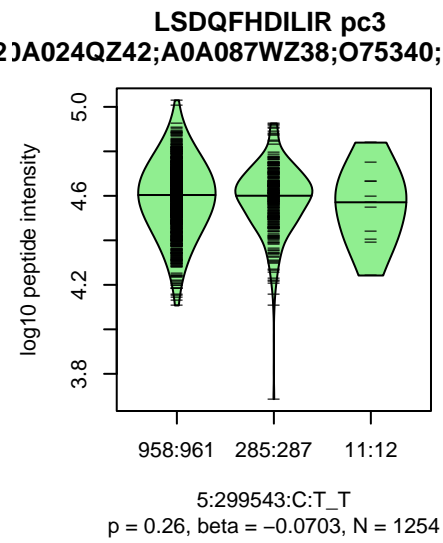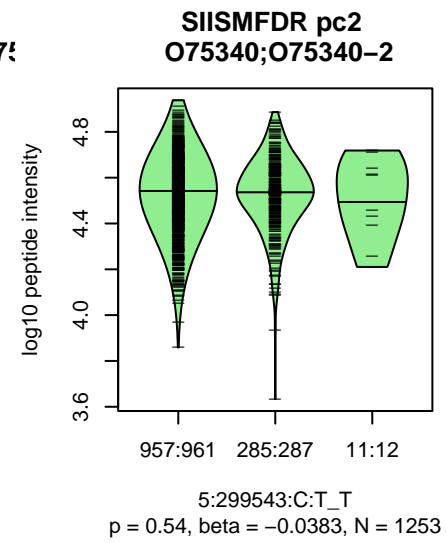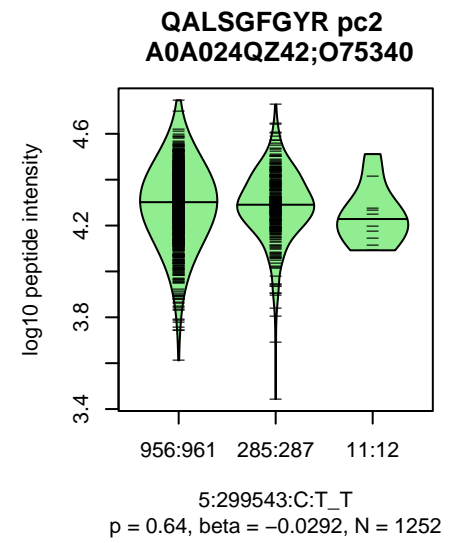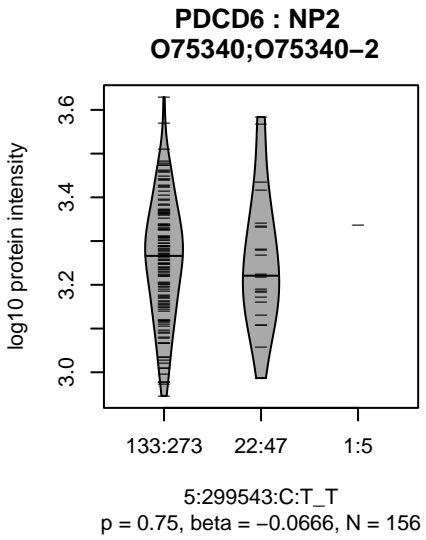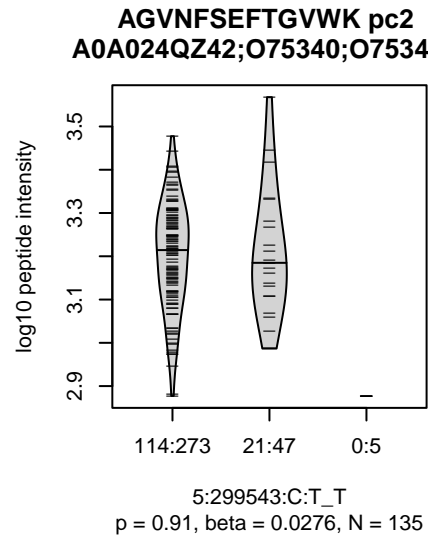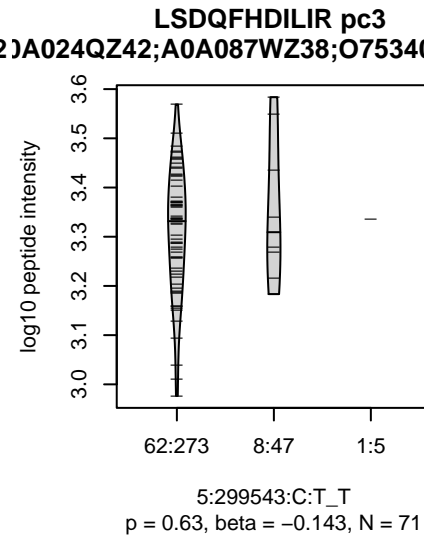

Assay Target: PDCD6  
 Olink UniProt: O75340  
 UKB rsID: rs9654451  
 Proxy rsID: rs9654451  
 UKB SNP: 5:299543:C:T  
 Proxy SNP: 5:299543:C:T  
 UKB log10(p): 5682.7  
 UKB BETA: -1.506  
 -----  
 1254:1254:1253:1252:1217:121

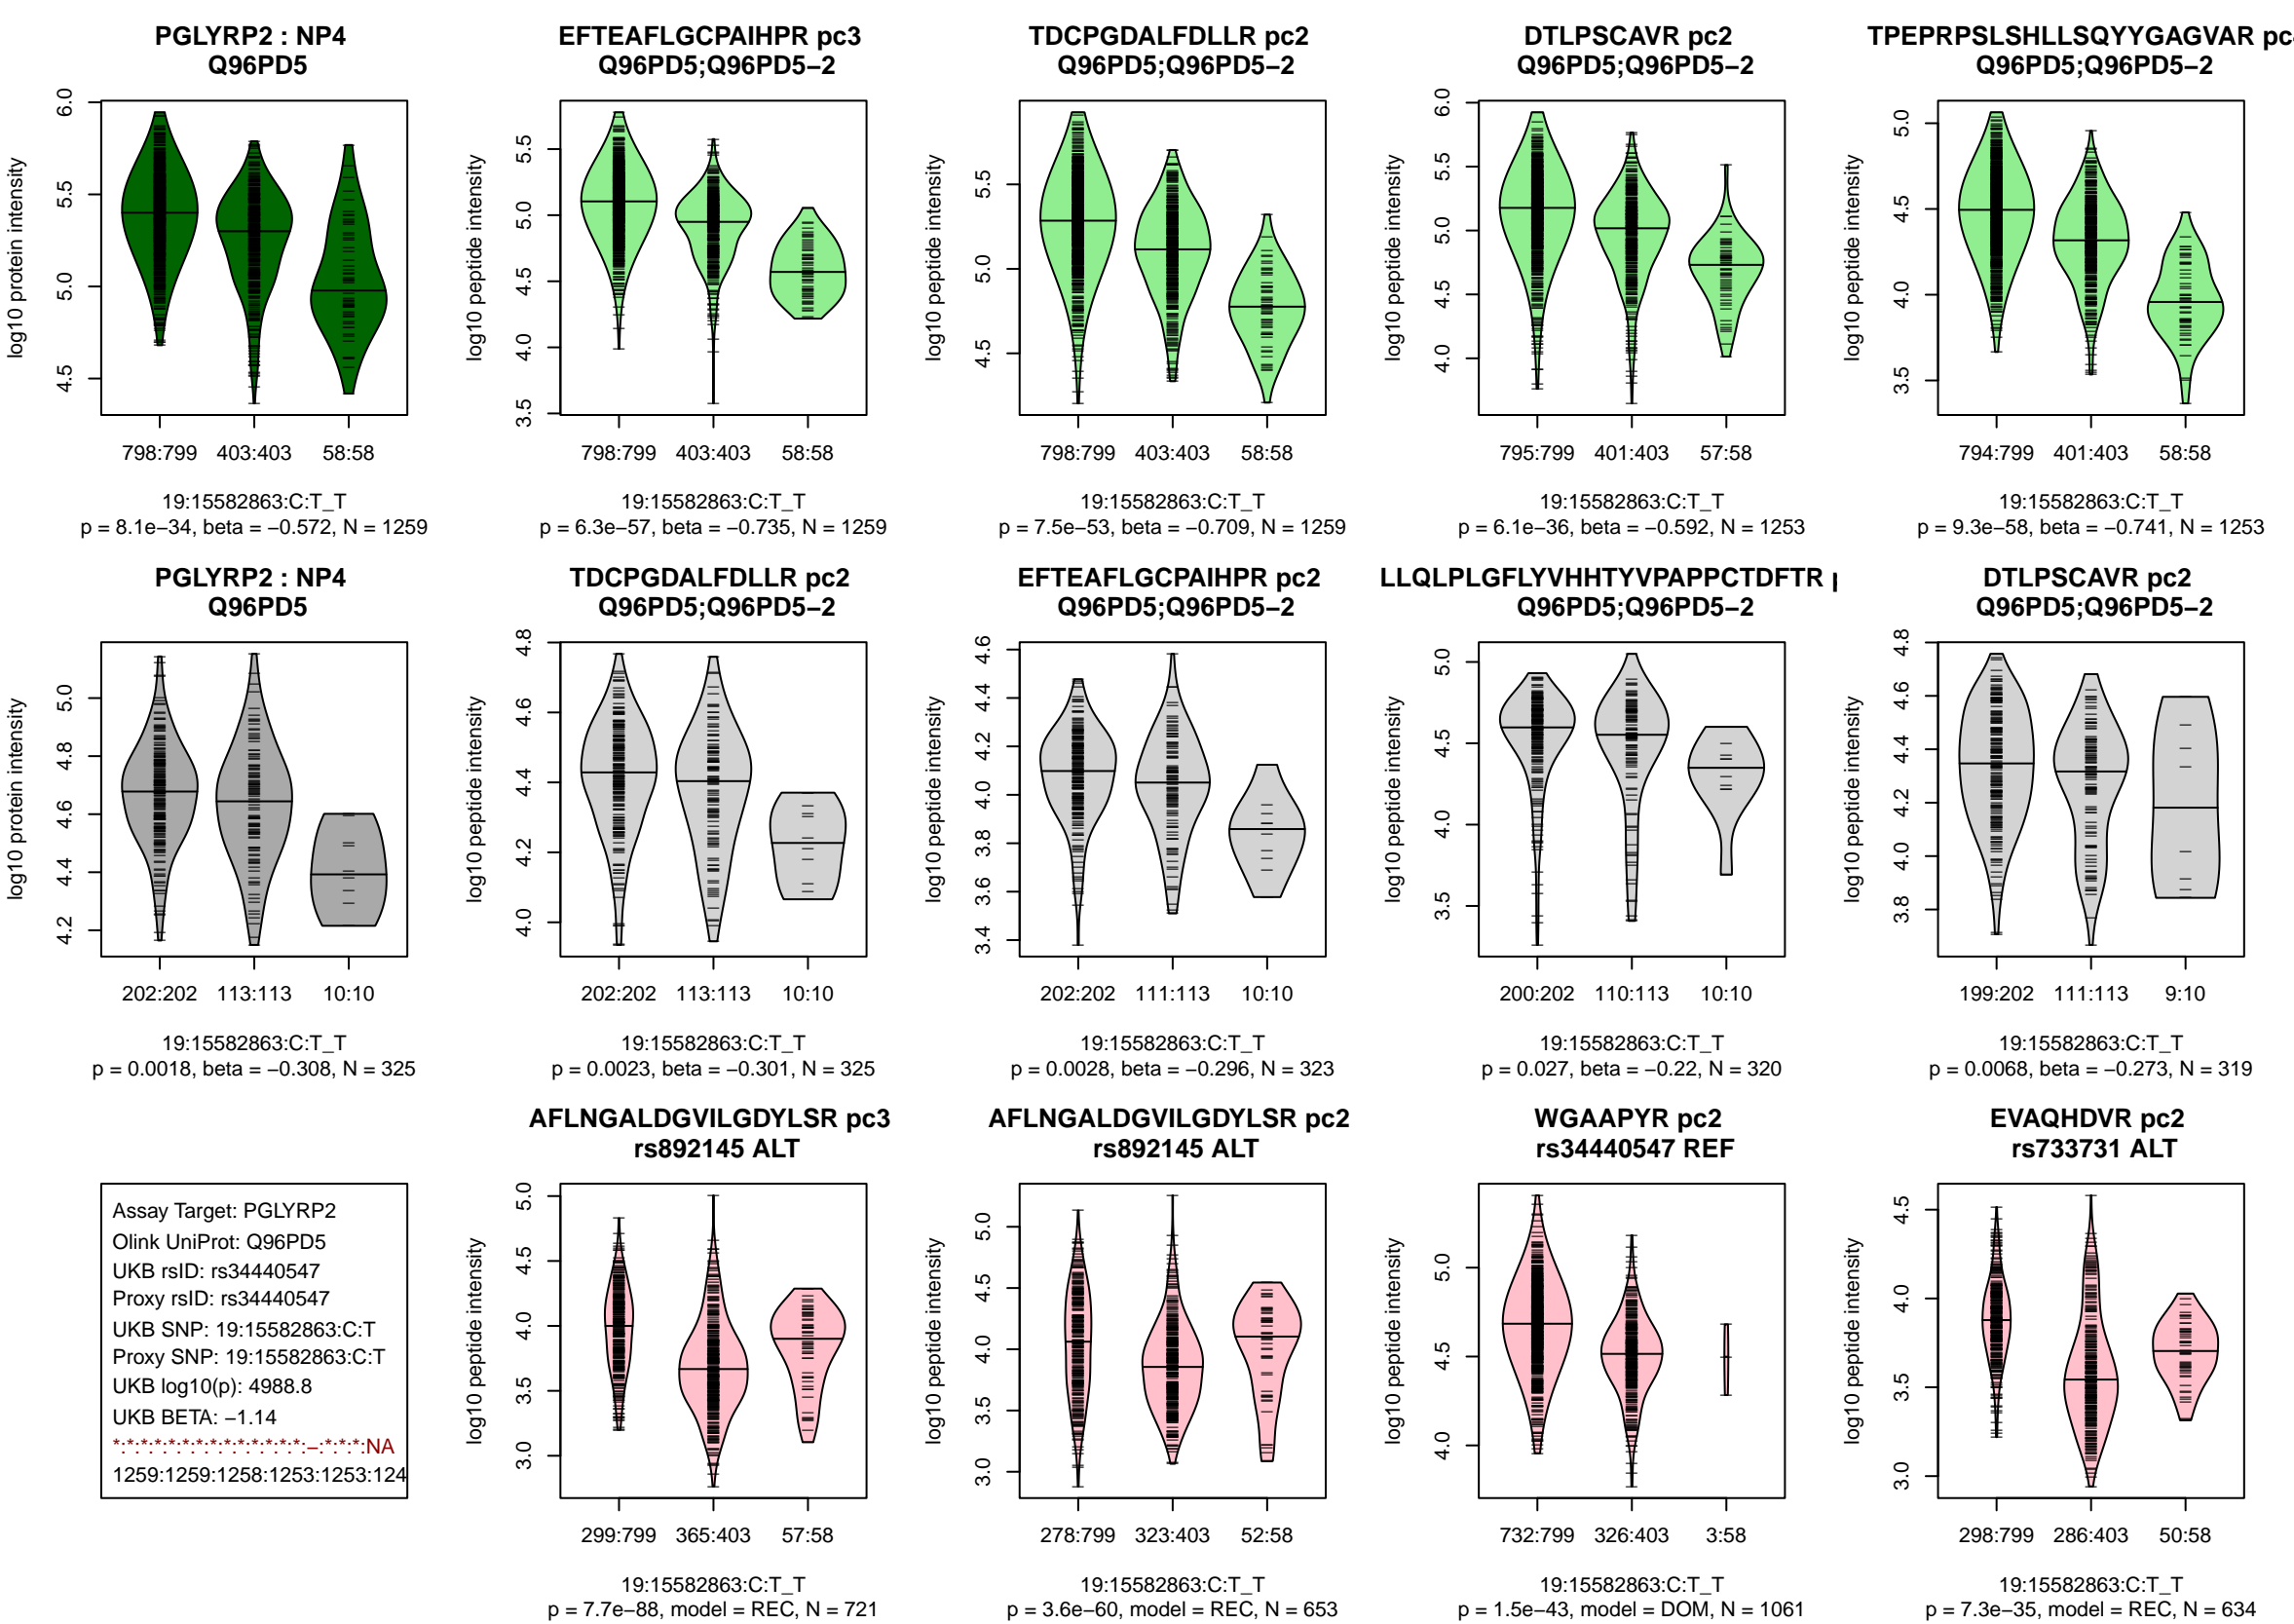

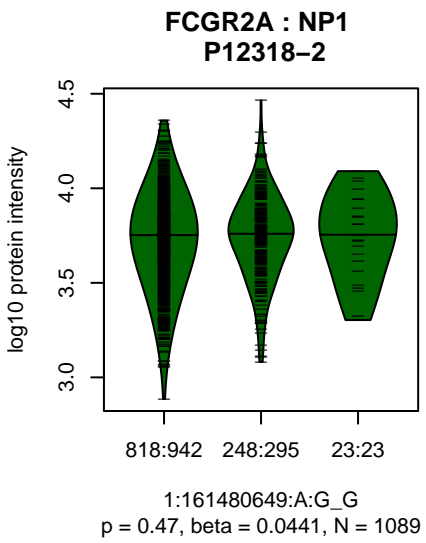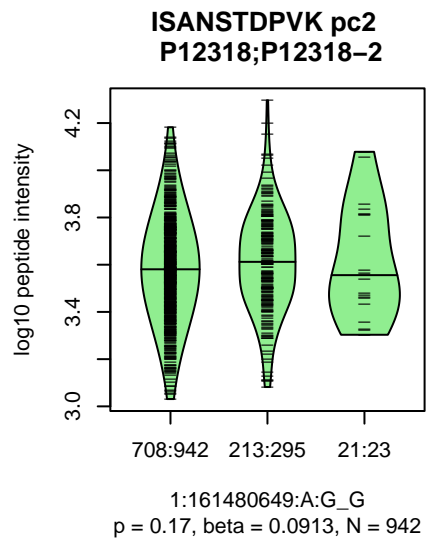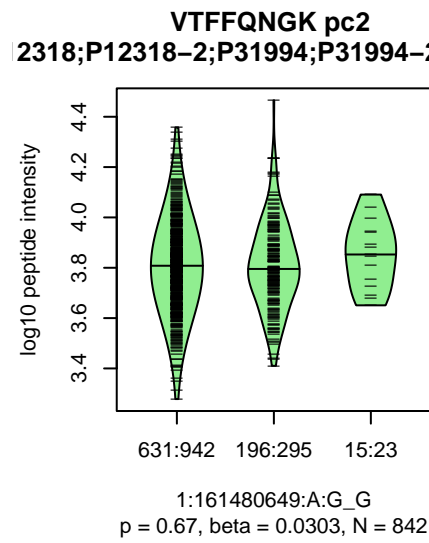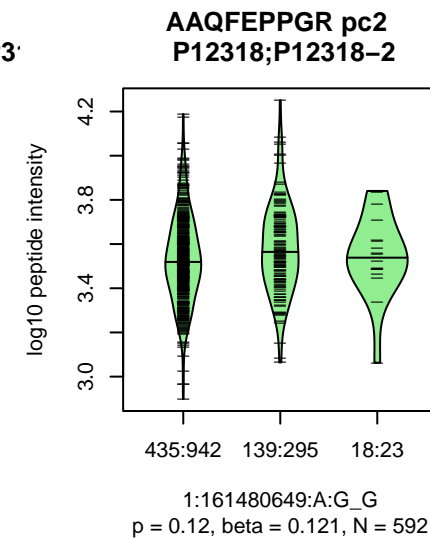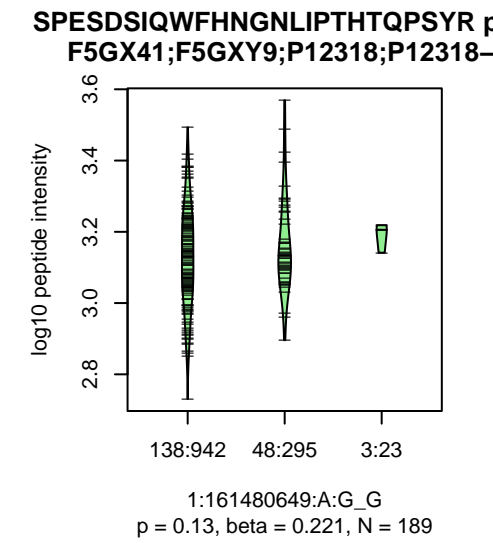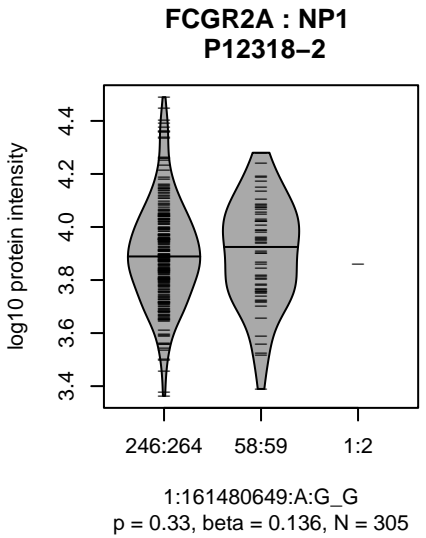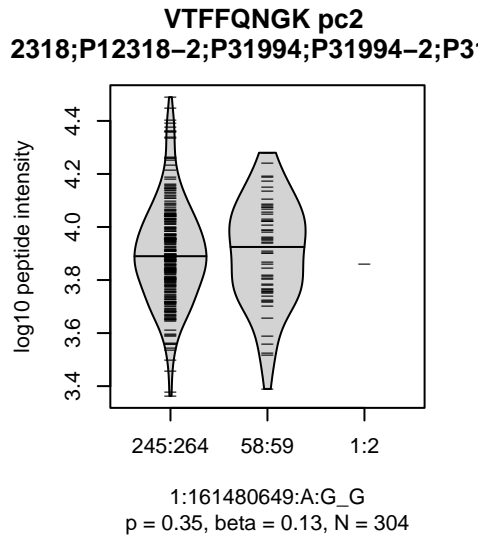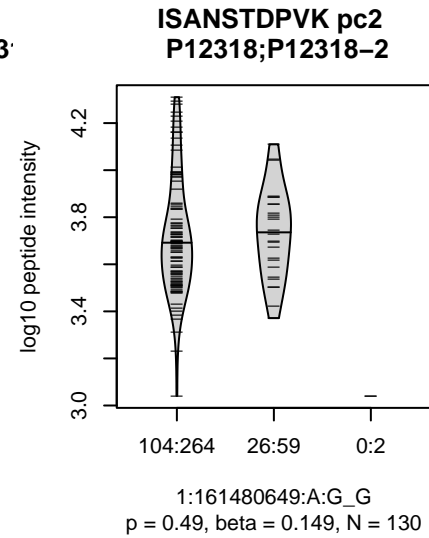

**LEPPWINVLQEDSVTLTCQGAR pc2**  
**rs9427398 REF**

Assay Target: FCGR2A  
Olink UniProt: P12318  
UKB rsID: rs11810143  
Proxy rsID: rs11810143  
UKB SNP: 1:161480649:A:G  
Proxy SNP: 1:161480649:A:G  
UKB log10(p): 4980.3  
UKB BETA: -1.453  
-:-:-:-:NA  
942:842:592:189:12

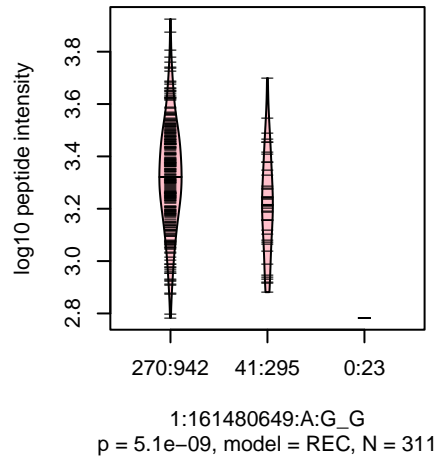

**C1QTNF9 : NP4  
P0C862**

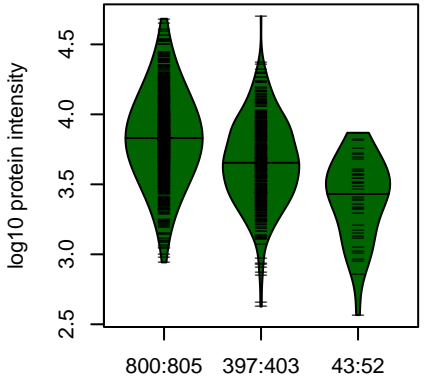

13:24891017:C:A\_C  
p = 8.9e-31, beta = -0.573, N = 1240

**IGETLVLPK pc2  
B2RNN3;P0C862**

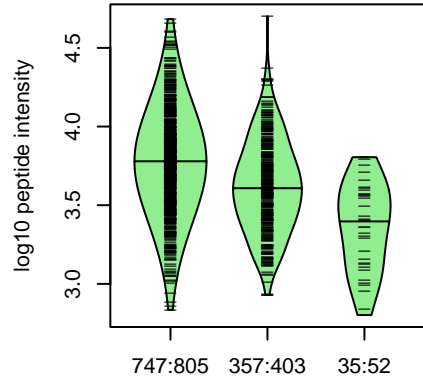

13:24891017:C:A\_C  
p = 2.5e-21, beta = -0.504, N = 1139

**SAFTVGLTVLSK pc2  
B2RNN3;P0C862**

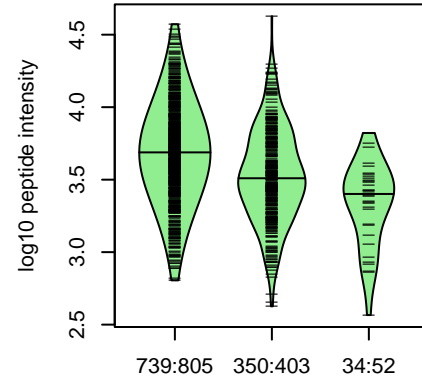

13:24891017:C:A\_C  
p = 1e-17, beta = -0.462, N = 1123

**ILYNEFNHYDTAAGK pc3  
P0C862**

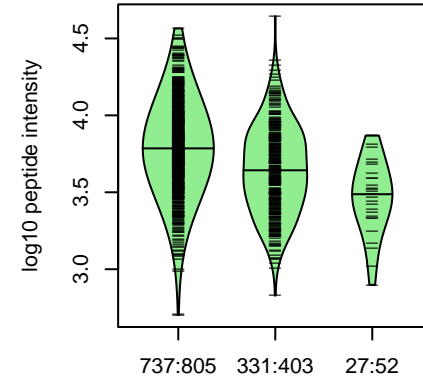

13:24891017:C:A\_C  
p = 8.2e-18, beta = -0.483, N = 1095

**LGDEVWLQVTGGER pc2  
P0C862**

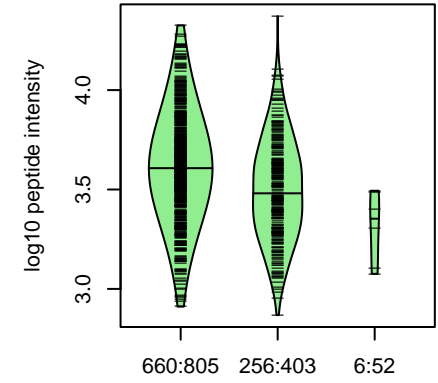

13:24891017:C:A\_C  
p = 3.1e-09, beta = -0.411, N = 922

**C1QTNF9 : NP4  
P0C862**

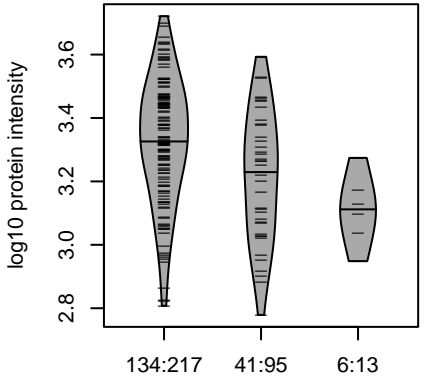

13:24891017:C:A\_C  
p = 0.003, beta = -0.409, N = 181

**ILYNEFNHYDTAAGK pc3  
P0C862**

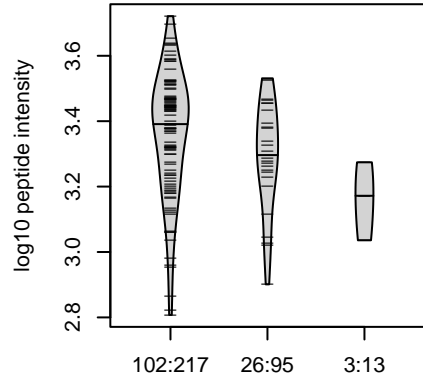

13:24891017:C:A\_C  
p = 0.075, beta = -0.314, N = 131

**IGETLVLPK pc2  
B2RNN3;P0C862**

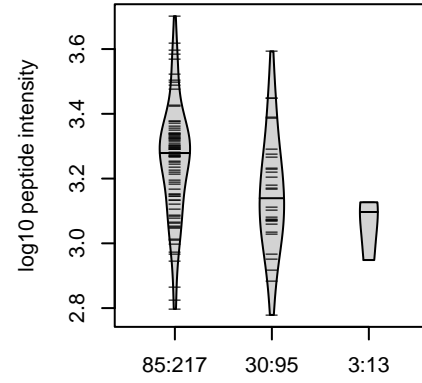

13:24891017:C:A\_C  
p = 0.02, beta = -0.403, N = 118

**FPSSDVPIK pc2  
rs3751357 ALT**

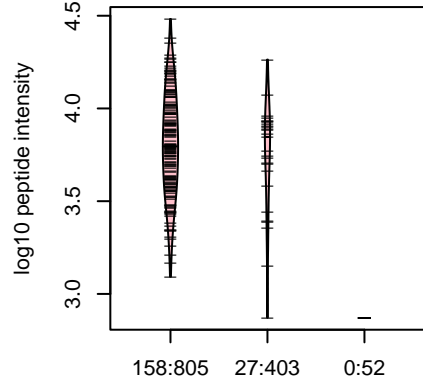

13:24891017:C:A\_C  
p = 4.6e-12, model = REC, N = 185

**FPSSDMPK pc2  
rs3751357 REF**

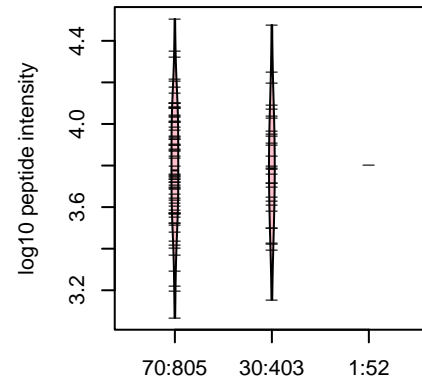

13:24891017:C:A\_C  
p = 0.12, model = DOM, N = 101

Assay Target: C1QTNF9  
Olink UniProt: P0C862  
UKB rsID: rs1961993  
Proxy rsID: rs1961993  
UKB SNP: 13:24891017:C:A  
Proxy SNP: 13:24891017:C:A  
UKB log10(p): 4552.4  
UKB BETA: 1.129  
\*.\*.\*.\*:NA  
1139:1123:1095:922:3

**LECT2 : NP4  
O14960**

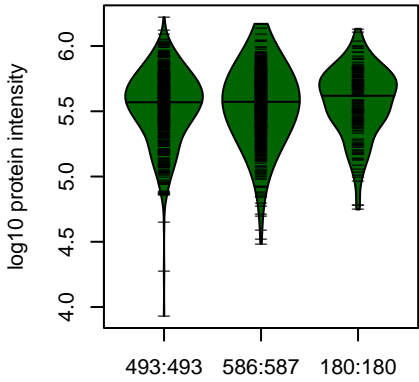

5:135288113:A:G\_A  
 $p = 0.17$ ,  $\beta = 0.0561$ ,  $N = 1259$

**LGTLPLQK pc2  
D6RD58;O14960**

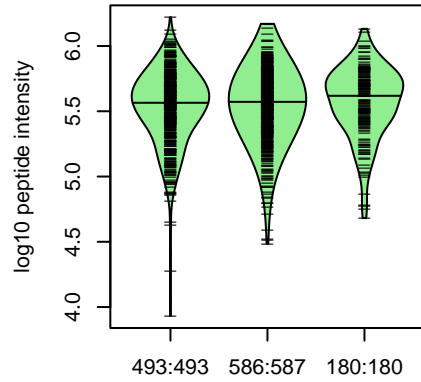

5:135288113:A:G\_A  
 $p = 0.2$ ,  $\beta = 0.0523$ ,  $N = 1259$

**NAINNGVR pc2  
D6RD58;D6RGX8;E5RHW6;O1496**

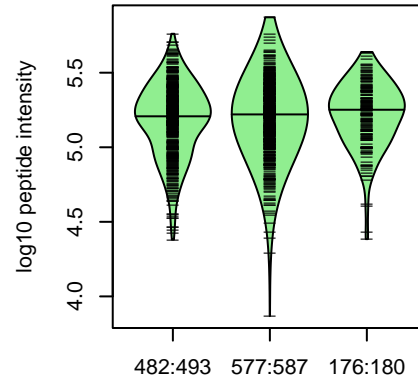

5:135288113:A:G\_A  
 $p = 0.14$ ,  $\beta = 0.0615$ ,  $N = 1235$

**HGCGQYSAQR pc2  
D6RGX8;E5RHW6;O14960**

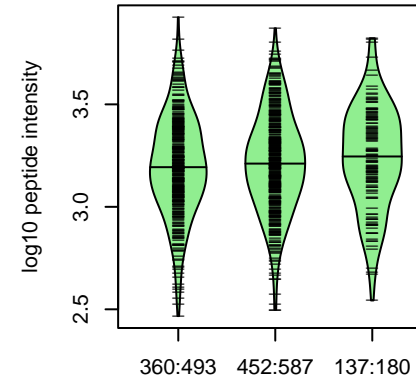

5:135288113:A:G\_A  
 $p = 0.11$ ,  $\beta = 0.0759$ ,  $N = 949$

**LECT2 : NP4  
O14960**

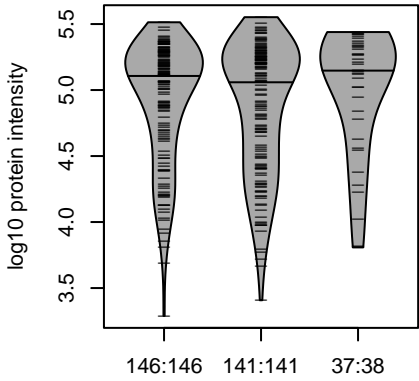

5:135288113:A:G\_A  
 $p = 0.86$ ,  $\beta = 0.0143$ ,  $N = 324$

**LGTLPLQK pc2  
D6RD58;O14960**

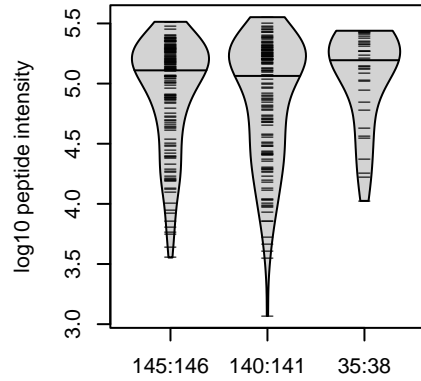

5:135288113:A:G\_A  
 $p = 0.47$ ,  $\beta = 0.0602$ ,  $N = 320$

**NAINNGVR pc2  
D6RD58;D6RGX8;E5RHW6;O1496**

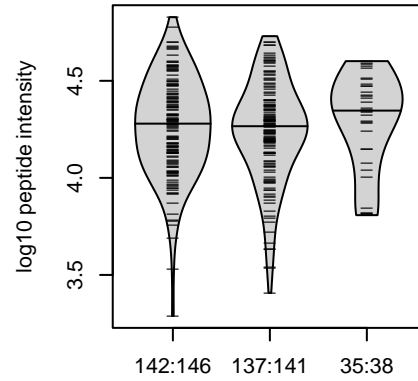

5:135288113:A:G\_A  
 $p = 0.67$ ,  $\beta = -0.0353$ ,  $N = 314$

**HGCGQYSAQR pc2  
D6RGX8;E5RHW6;O14960**

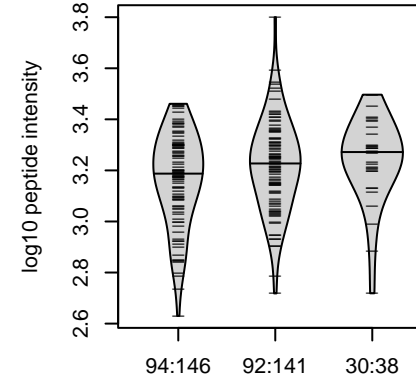

5:135288113:A:G\_A  
 $p = 0.068$ ,  $\beta = 0.175$ ,  $N = 216$

Assay Target: LECT2  
Olink UniProt: O14960  
UKB rsID: rs31515  
Proxy rsID: rs31515  
UKB SNP: 5:135288113:A:G  
Proxy SNP: 5:135288113:A:G  
UKB log10(p): 4434.6  
UKB BETA: -0.789  
-:-:-  
1259:1235:949



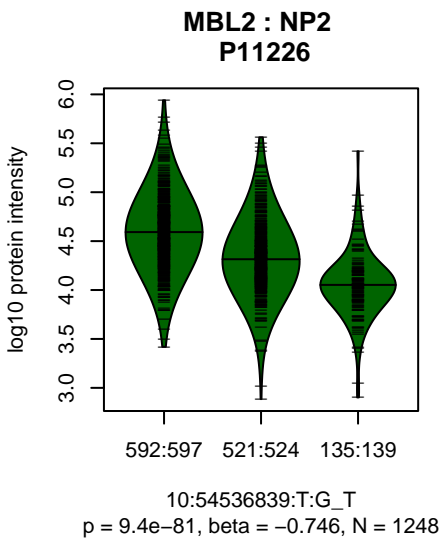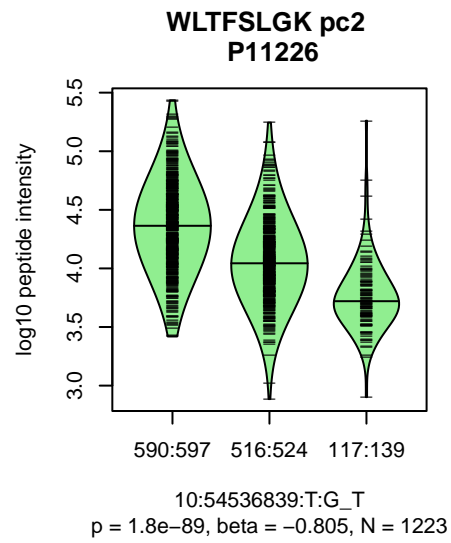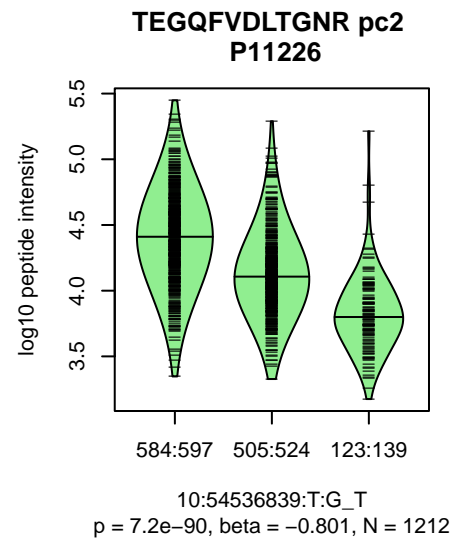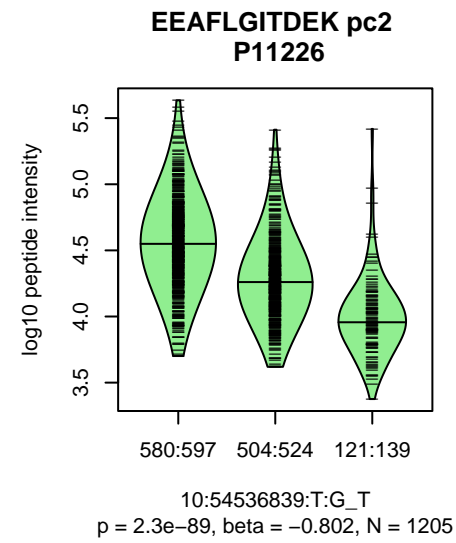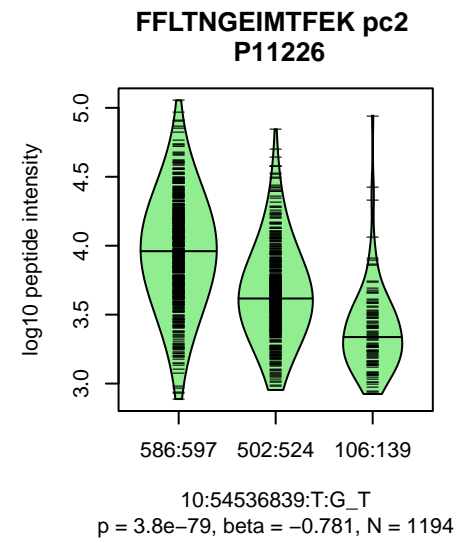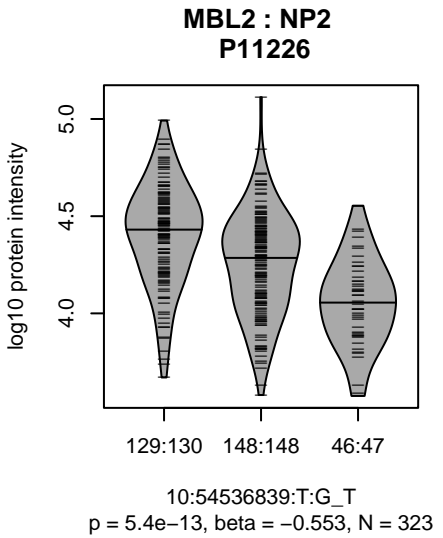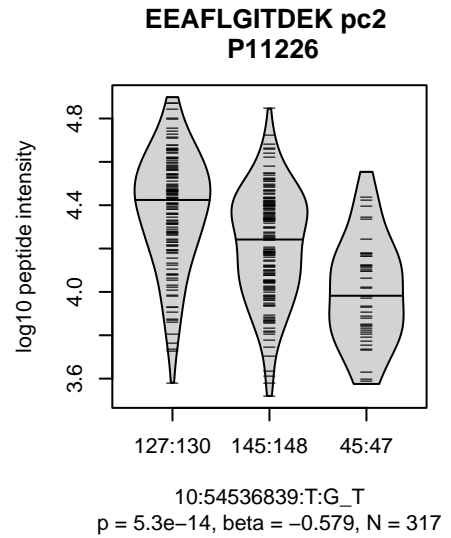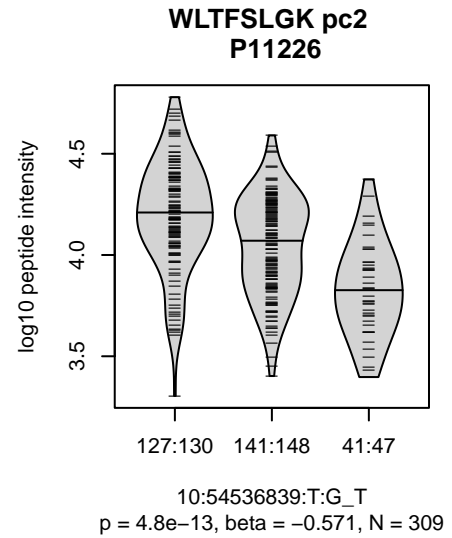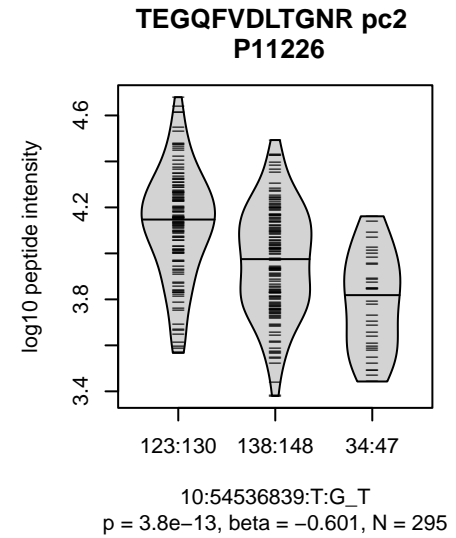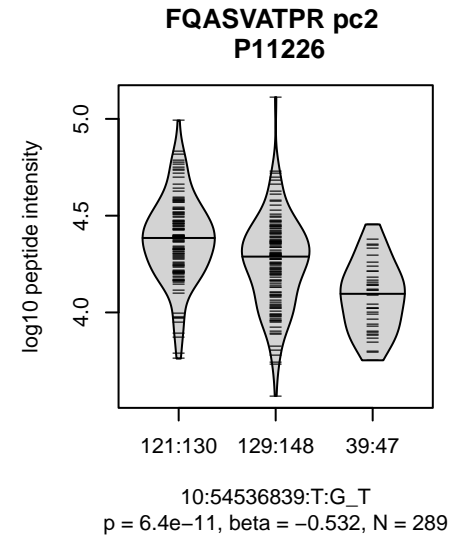

Assay Target: MBL2  
 Olink UniProt: P11226  
 UKB rsID: rs7899547  
 Proxy rsID: rs7899547  
 UKB SNP: 10:54536839:T:G  
 Proxy SNP: 10:54536839:T:G  
 UKB log10(p): 4214.8  
 UKB BETA: 0.905  
 \*.\*.\*.\*.\*.\*.\*.\*:NA  
 1223:1212:1205:1194:1164:106



**IL7R : NP2  
P16871**

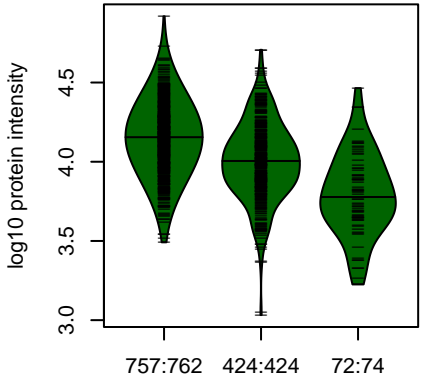

5:35874575:C:T\_T  
p = 3.3e-39, beta = -0.592, N = 1253

**LQEIFYETK pc2  
B8YG18;D6RDM4;P16871;P16871-**

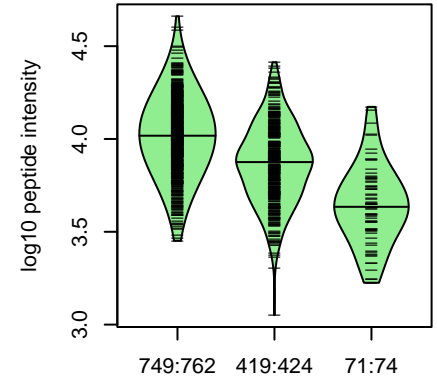

5:35874575:C:T\_T  
p = 5.1e-54, beta = -0.694, N = 1239

**VLMHDVAYR pc2  
B8YG18;P16871;P16871-3**

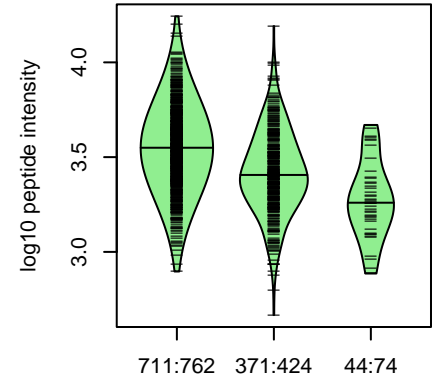

5:35874575:C:T\_T  
p = 2.2e-27, beta = -0.554, N = 1126

**LQPAAMYEIK pc2  
P16871;P16871-3**

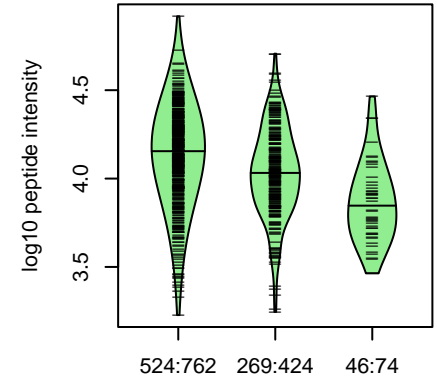

5:35874575:C:T\_T  
p = 1.2e-11, beta = -0.386, N = 839

**SIPDHYFK pc2  
P16871;P16871-3**

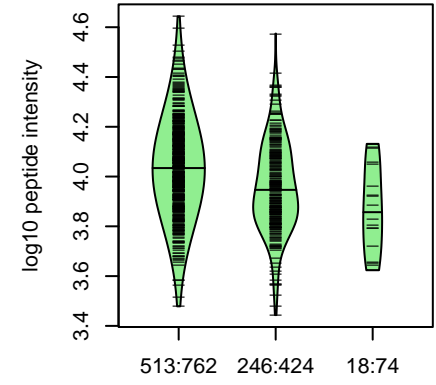

5:35874575:C:T\_T  
p = 2e-09, beta = -0.401, N = 777

**IL7R : NP2  
P16871-3**

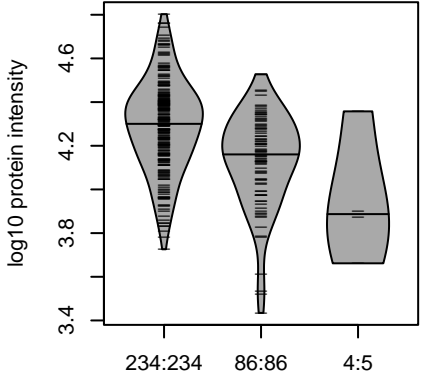

5:35874575:C:T\_T  
p = 3.9e-08, beta = -0.614, N = 324

**LQEIFYETK pc2  
B8YG18;D6RDM4;P16871;P16871-**

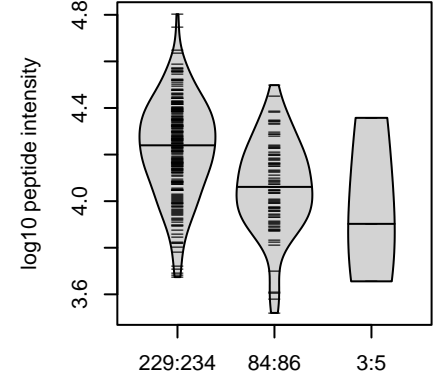

5:35874575:C:T\_T  
p = 5.3e-08, beta = -0.626, N = 316

**LQPAAMYEIK pc2  
P16871;P16871-3**

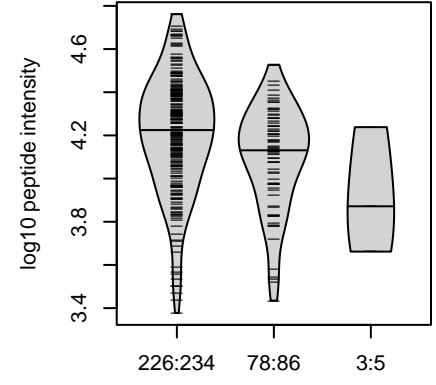

5:35874575:C:T\_T  
p = 0.00048, beta = -0.417, N = 307

**VLMHDVAYR pc2  
B8YG18;P16871;P16871-3**

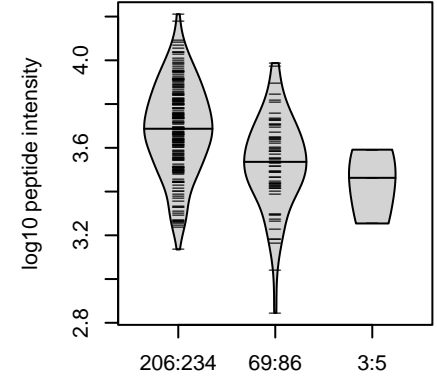

5:35874575:C:T\_T  
p = 1.6e-07, beta = -0.648, N = 278

Assay Target: IL7R  
Olink UniProt: P16871  
UKB rsID: rs6897932  
Proxy rsID: rs6897932  
UKB SNP: 5:35874575:C:T  
Proxy SNP: 5:35874575:C:T  
UKB log10(p): 3931.5  
UKB BETA: -0.889  
\*\*\*:\*\*\*:--  
1239:1126:839:777:84:38



TPSAB1 : NP5  
WPWQVSLR pc2  
;A0A087X1U0;A0A140VJT7;J3QTS8;A0A0C4DFZ7;A0A140VJT7;J3QTS8;Q

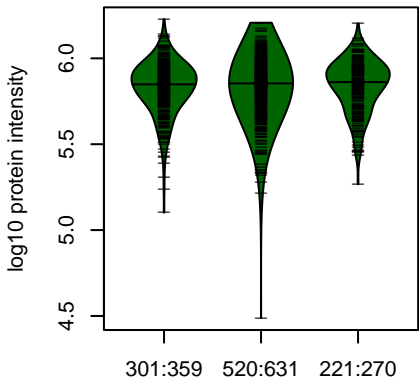

16:1295818:T:A\_A  
p = 0.45, beta = 0.033, N = 1042

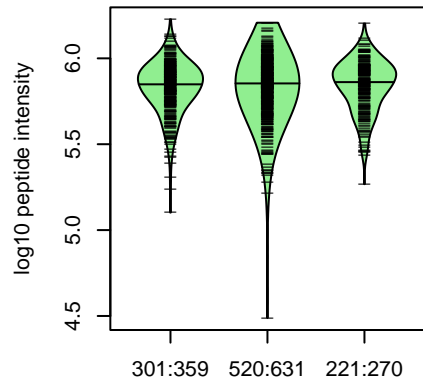

16:1295818:T:A\_A  
p = 0.45, beta = 0.033, N = 1042

TPSAB1 : NP5  
WPWQVSLR pc2  
;A0A087X1U0;A0A140VJT7;J3QTS8;A0A0C4DFZ7;A0A140VJT7;J3QTS8;Q

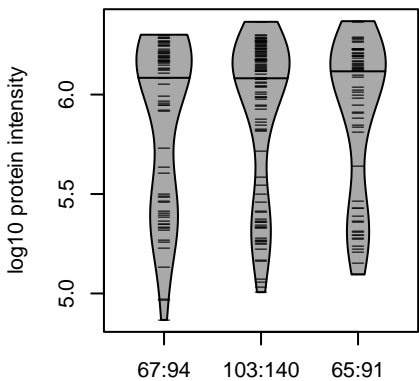

16:1295818:T:A\_T  
p = 0.56, beta = 0.0495, N = 235

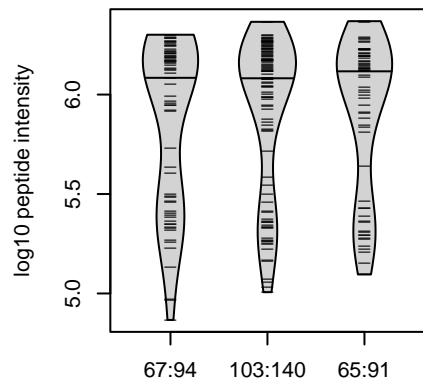

16:1295818:T:A\_T  
p = 0.56, beta = 0.0495, N = 235

Assay Target: TPSAB1  
Olink UniProt: Q15661  
UKB rsID: rs8051930  
Proxy rsID: rs8051930  
UKB SNP: 16:1295818:T:A  
Proxy SNP: 16:1295818:T:A  
UKB log10(p): 3832.7  
UKB BETA: 0.814  
-  
1042

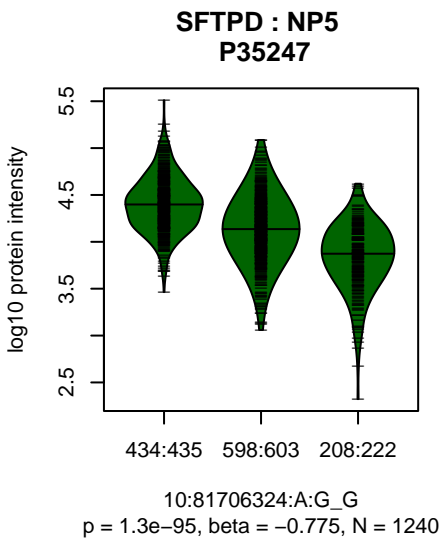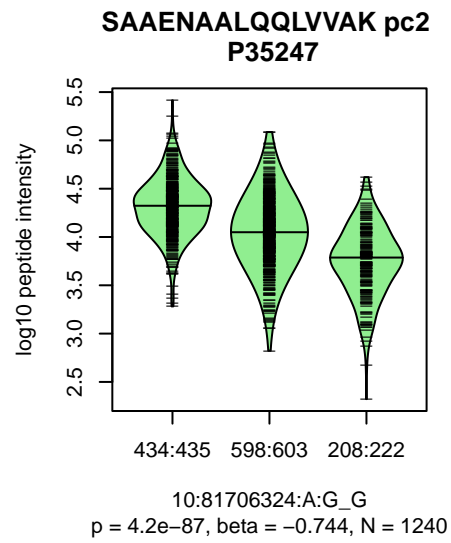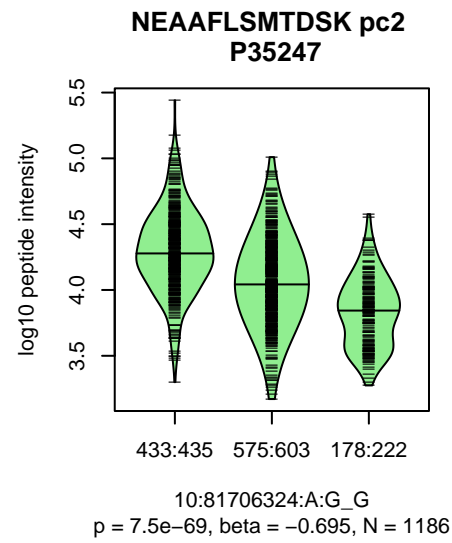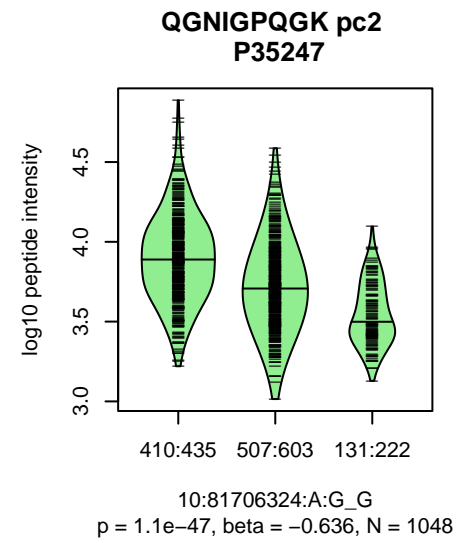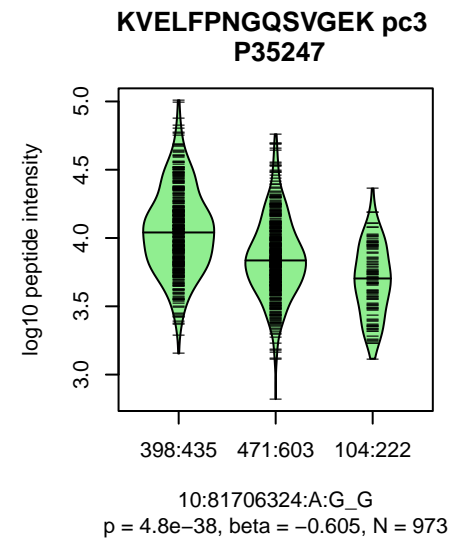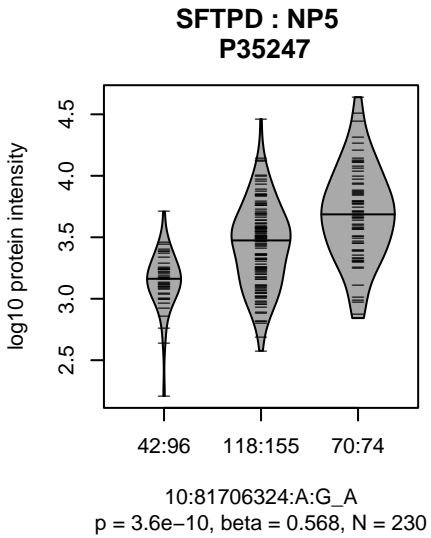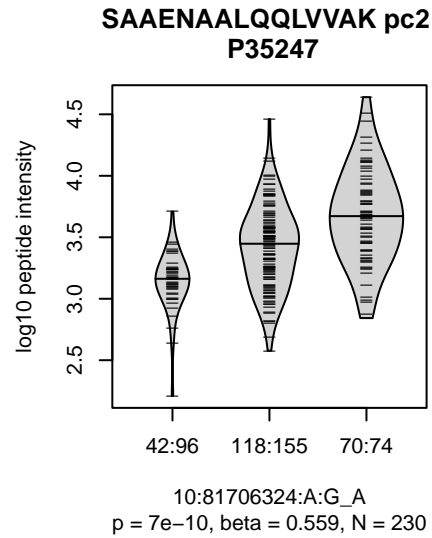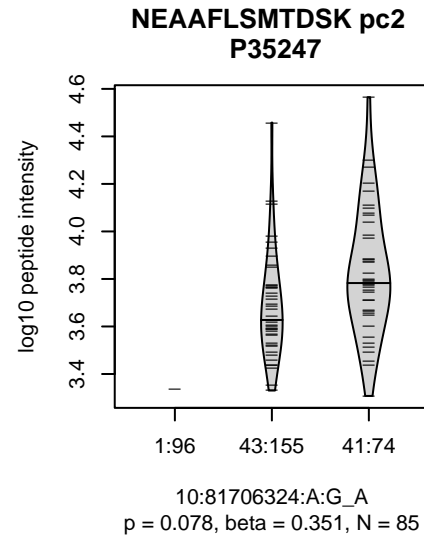

**PFTEAQLLCTQAGGQLATPR pc3  
rs3088308 ALT**

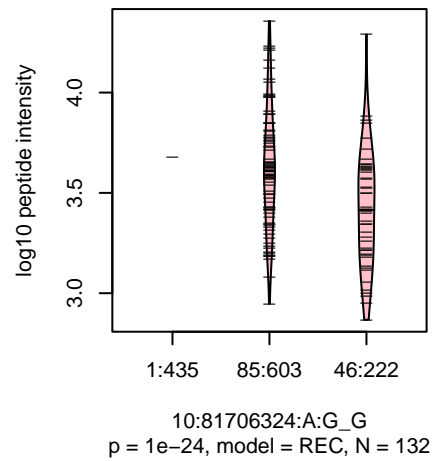

**PFTEAQLLCTQAGGQLASPR pc3  
rs3088308 REF**

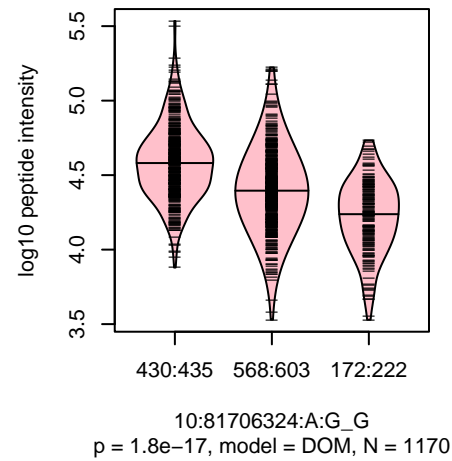

Assay Target: SFTPD  
Olink UniProt: P35247  
UKB rsID: rs721917  
Proxy rsID: rs721917  
UKB SNP: 10:81706324:A:G  
Proxy SNP: 10:81706324:A:G  
UKB log10(p): 3560.7  
UKB BETA: -0.755  
\*\*\*\*\*  
1240:1186:1048:973:881:744:33

**CCL16 : NP3**  
**O15467**

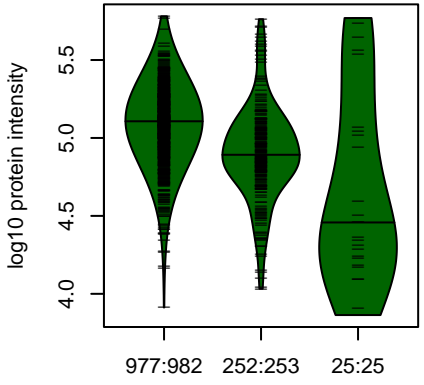

17:34307457:T:C\_C  
p = 1.6e-25, beta = -0.609, N = 1254

**DPNLPLLPTR pc3**  
**O15467**

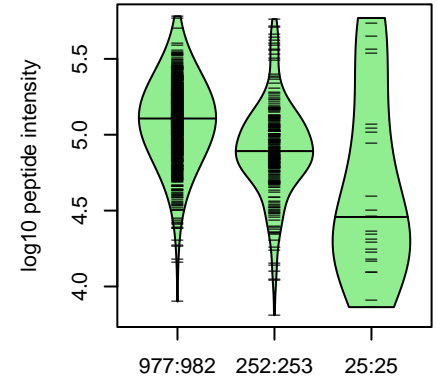

17:34307457:T:C\_C  
p = 2.3e-25, beta = -0.607, N = 1254

**ALNCHLPAIIFVTK pc3**  
**O15467**

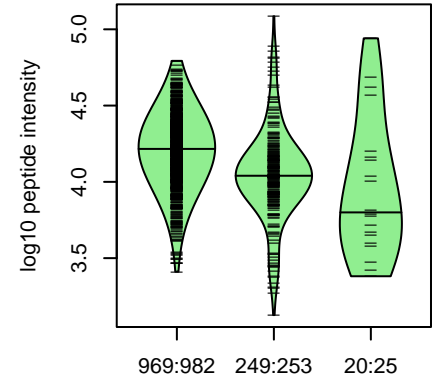

17:34307457:T:C\_C  
p = 5e-20, beta = -0.555, N = 1238

**VPEWVNTPSTCCLK pc2**  
**O15467**

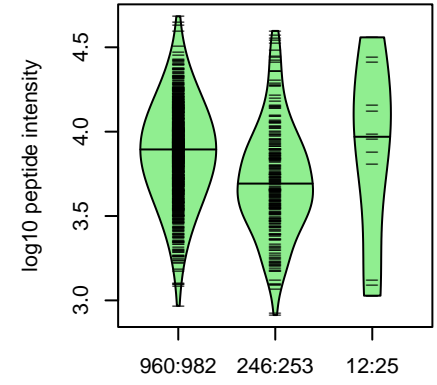

17:34307457:T:C\_C  
p = 2.8e-14, beta = -0.489, N = 1218

**EVCTNPNDWVQEIYK pc3**  
**O15467**

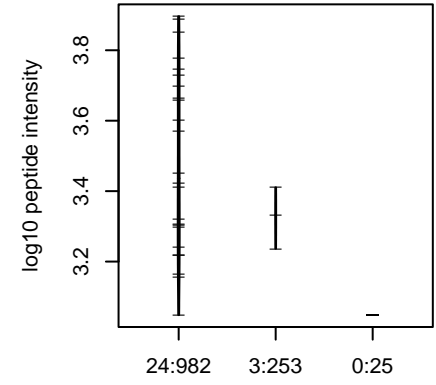

17:34307457:T:C\_C  
p = 0.76, beta = -0.174, N = 27

**CCL16 : NP3**  
**O15467**

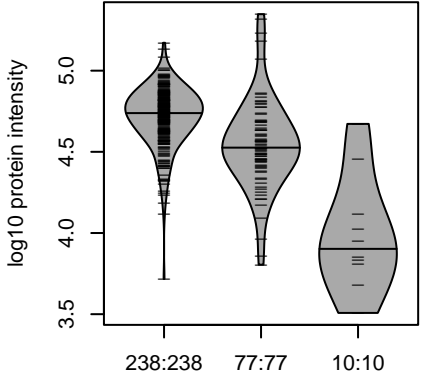

17:34307457:T:C\_C  
p = 6.8e-17, beta = -0.834, N = 325

**ALNCHLPAIIFVTK pc3**  
**O15467**

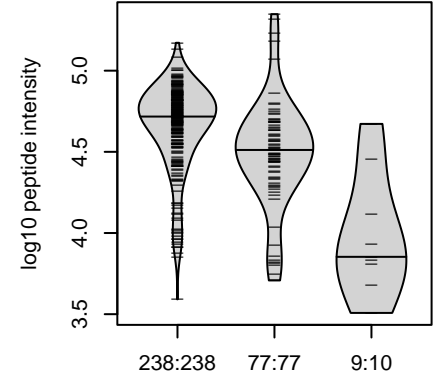

17:34307457:T:C\_C  
p = 6.6e-12, beta = -0.709, N = 324

**DPNLPLLPTR pc2**  
**O15467**

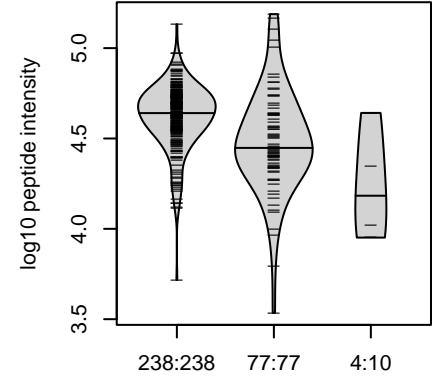

17:34307457:T:C\_C  
p = 2e-08, beta = -0.645, N = 319

**VPEWVNTPSTCCLK pc2**  
**O15467**

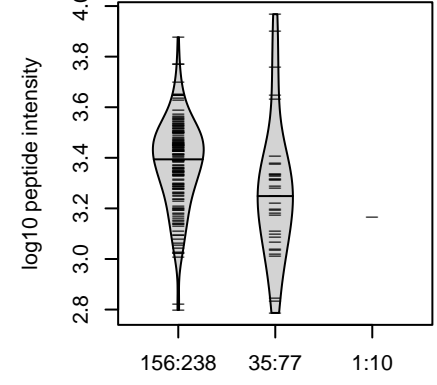

17:34307457:T:C\_C  
p = 0.00069, beta = -0.582, N = 192

Assay Target: CCL16  
Olink UniProt: O15467  
UKB rsID: rs112689088  
Proxy rsID: rs112689088  
UKB SNP: 17:34307457:T:C  
Proxy SNP: 17:34307457:T:C  
UKB log10(p): 3249.4  
UKB BETA: -1.203  
\*.\*.\*.\*.\*  
1254:1238:1219:1218:27

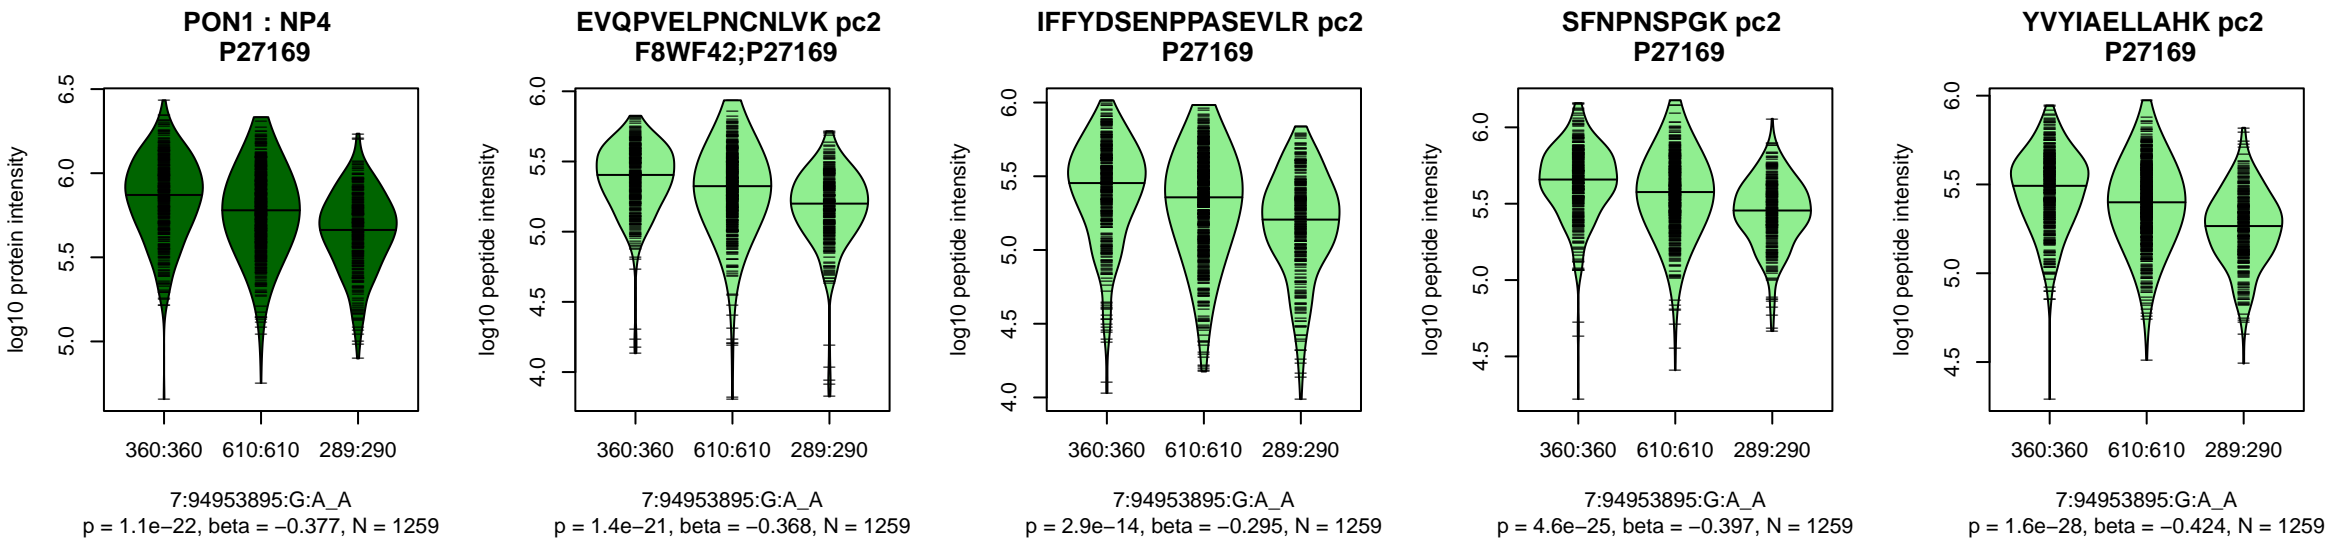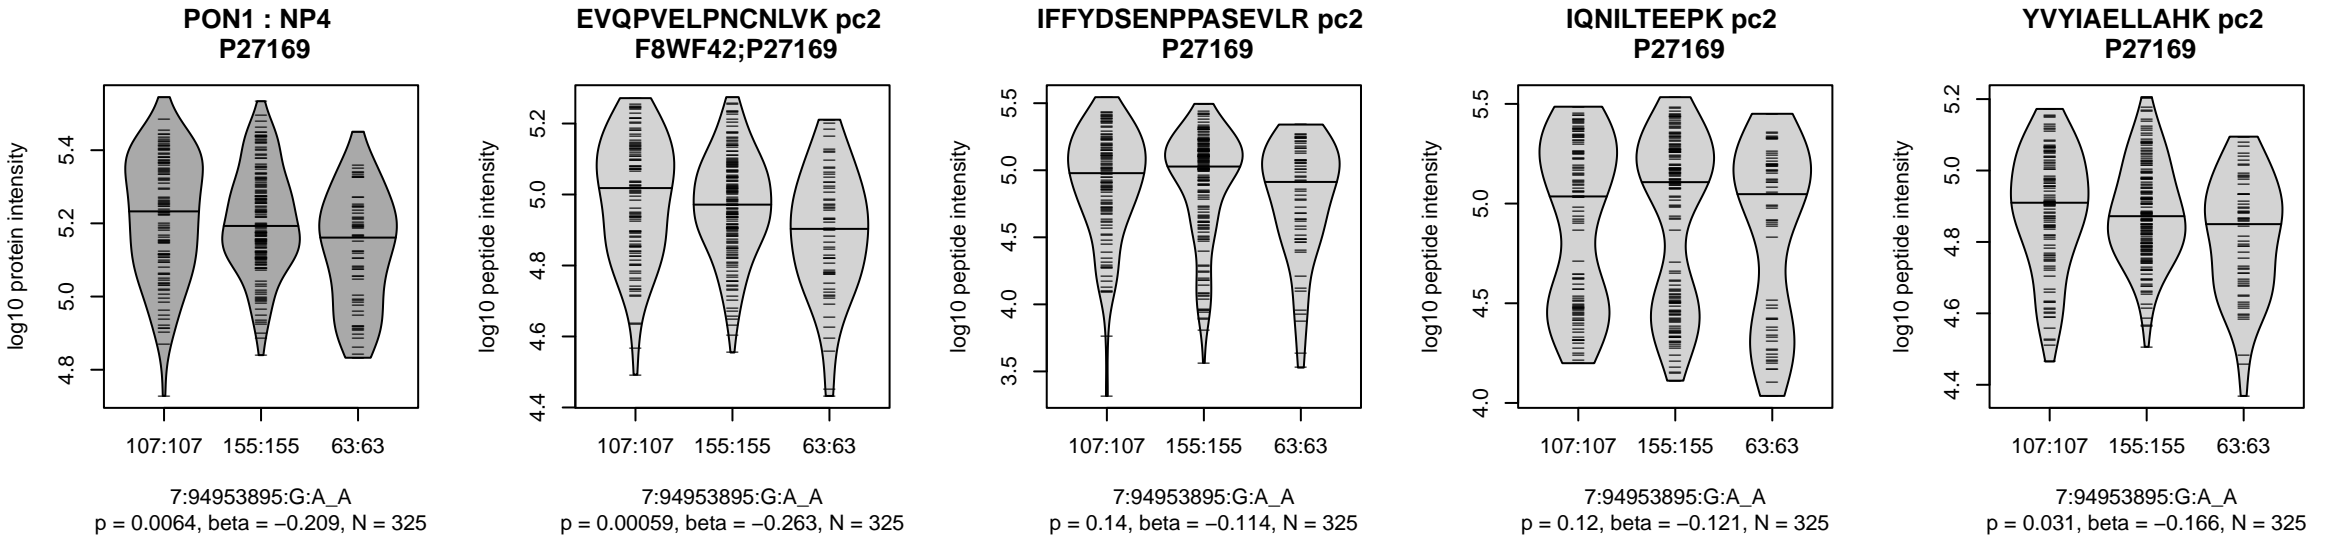

**GIETGSEDMEILPNGLAFISSGLK pc CM971236 ALT**    **GIETGSEDLEILPNGLAFISSGLK pc PNLNDIVAVGPEHFYGTNDHYFLDPYL CM971236 REF**    **rs662 ALT**

Assay Target: PON1  
 Olink UniProt: P27169  
 UKB rsID: rs705379  
 Proxy rsID: rs705379  
 UKB SNP: 7:94953895:G:A  
 Proxy SNP: 7:94953895:G:A  
 UKB log10(p): 3107.2  
 UKB BETA: -0.739  
 .....  
 1259:1259:1259:1259:1257:124

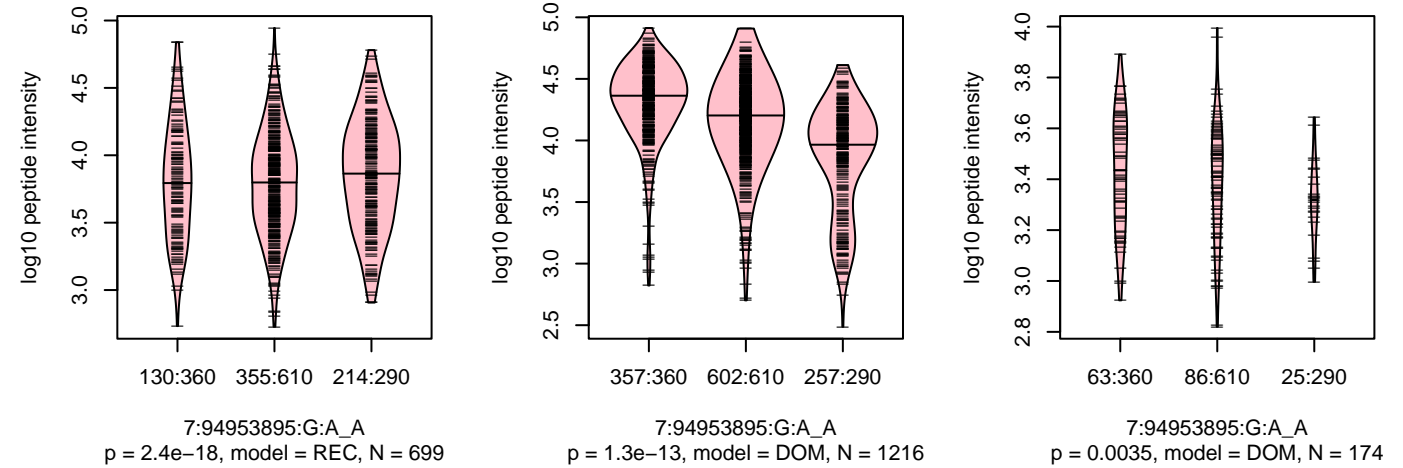



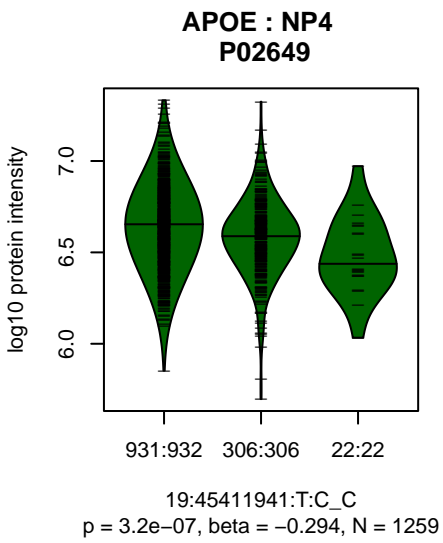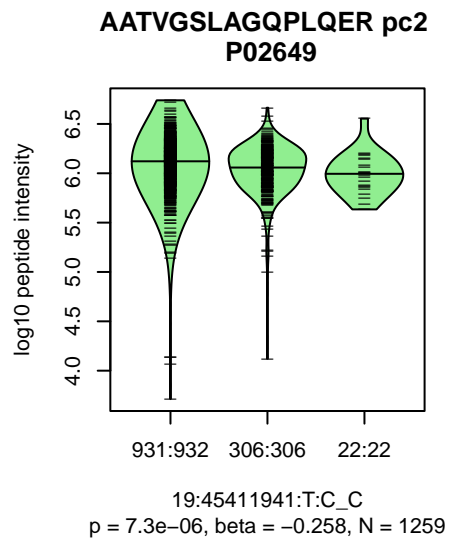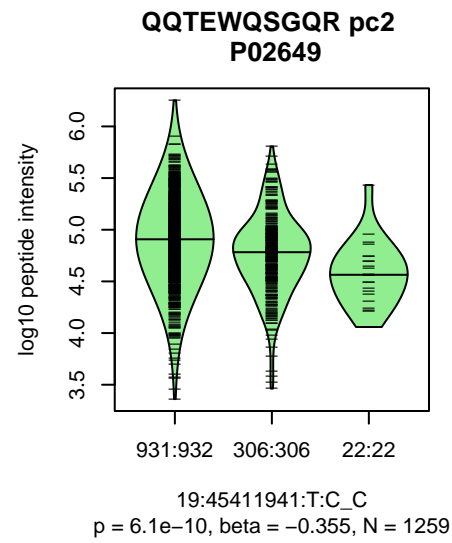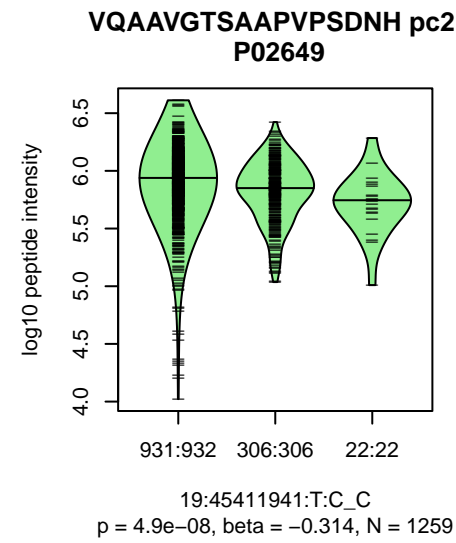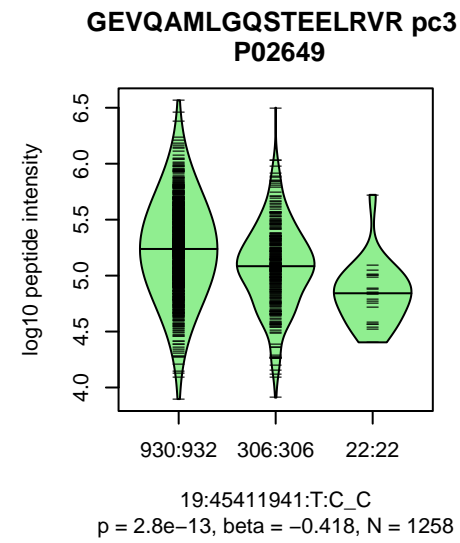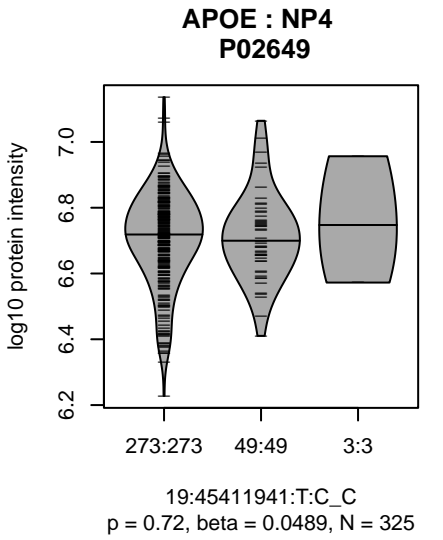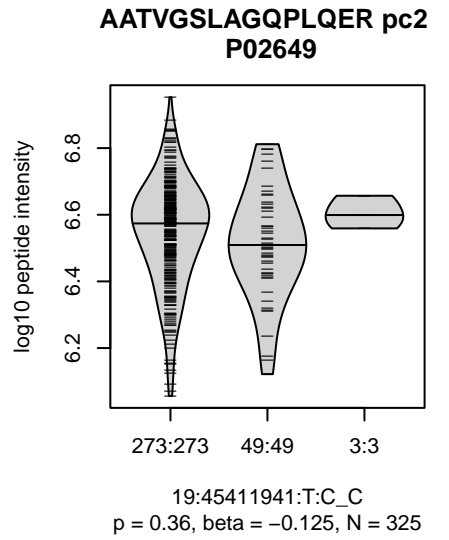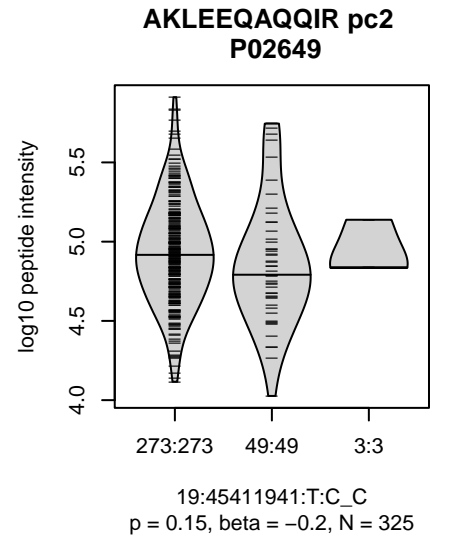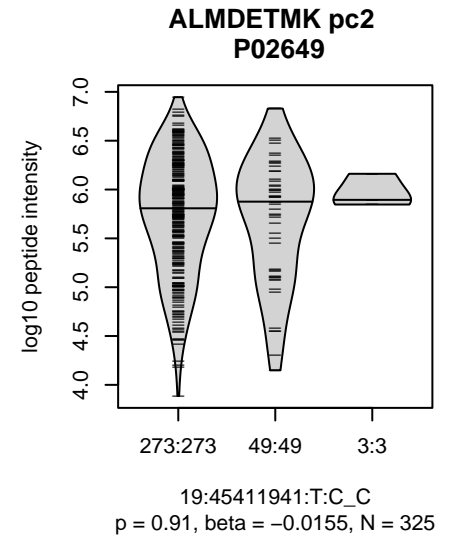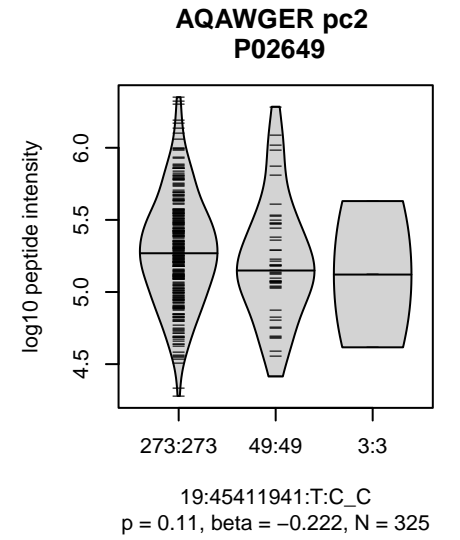

Assay Target: APOE  
 Olink UniProt: P02649  
 UKB rsID: rs429358  
 Proxy rsID: rs429358  
 UKB SNP: 19:45411941:T:C  
 Proxy SNP: 19:45411941:T:C  
 UKB log10(p): 3102.3  
 UKB BETA: -0.99  
 .....  
 1259:1259:1259:1258:1258:125

**FUT8 : NP1  
Q9BYC5**

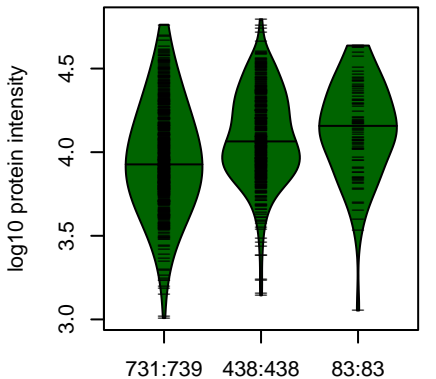

14:65796846:G:C\_G  
p = 9.2e-14, beta = 0.336, N = 1252

**VYLATDDPSLLK pc2**

**10A669KAW1;G3XAD2;Q9BYC5-3;Q99KAW1;G3XAD2;Q9BYC5-2;Q9BYC5-**

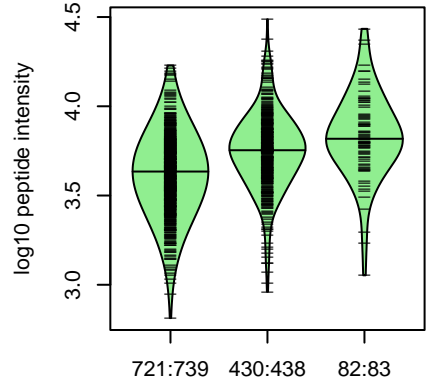

14:65796846:G:C\_G  
p = 3.5e-29, beta = 0.501, N = 1233

**TLILESQNWR pc2**

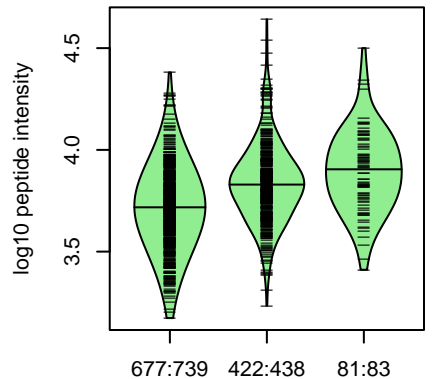

14:65796846:G:C\_G  
p = 2.5e-27, beta = 0.492, N = 1180

**NLEGNELQR pc2**

**A0A669KAW1;Q9BYC5-2;Q9BYC5-3;Q9BYC5-1;A0A669KAW1;G3XAD2;Q9BYC5-3;Q9BYC5-2**

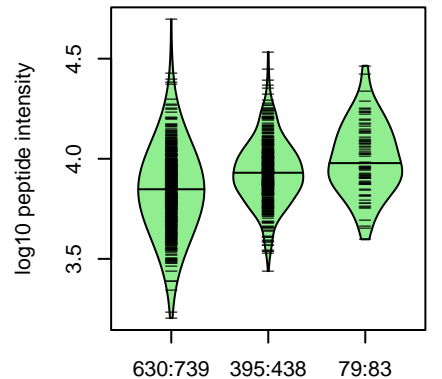

14:65796846:G:C\_G  
p = 2.1e-21, beta = 0.445, N = 1104

**VHGDPVWVVSQFVK pc3**

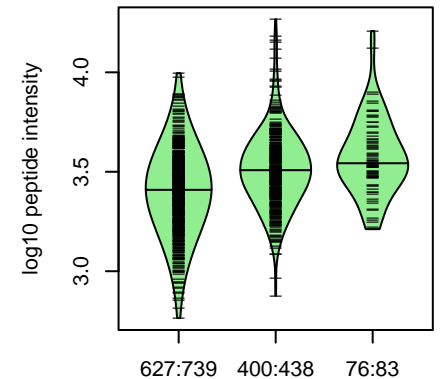

14:65796846:G:C\_G  
p = 6.5e-21, beta = 0.443, N = 1103

**FUT8 : NP1  
Q9BYC5**

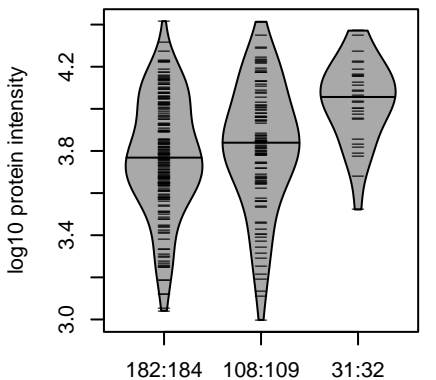

14:65796846:G:C\_G  
p = 2.3e-05, beta = 0.346, N = 321

**VYLATDDPSLLK pc2**

**10A669KAW1;G3XAD2;Q9BYC5-3;Q99KAW1;G3XAD2;Q9BYC5-2;Q9BYC5-1;Q9BYC5-2;Q9BYC5-3;Q9BYC5-1;Q9BYC5-2;Q9BYC5-3;Q9BYC5-1**

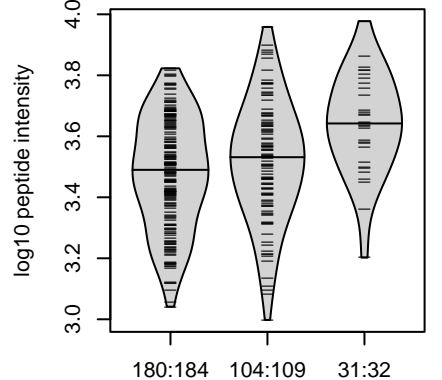

14:65796846:G:C\_G  
p = 4.7e-05, beta = 0.335, N = 315

**TLILESQNWR pc2**

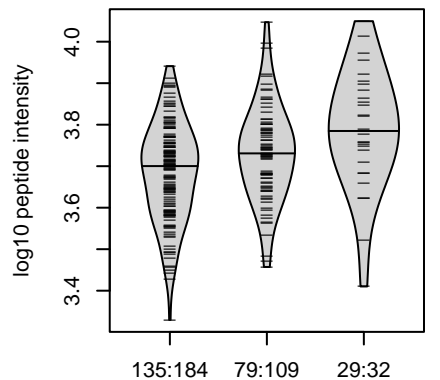

14:65796846:G:C\_G  
p = 3.2e-05, beta = 0.371, N = 243

**ITYLQNPk pc2**

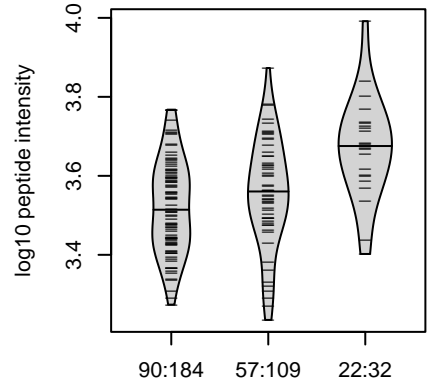

14:65796846:G:C\_G  
p = 9.7e-06, beta = 0.458, N = 169

**VHGDPVWVVSQFVK pc3**

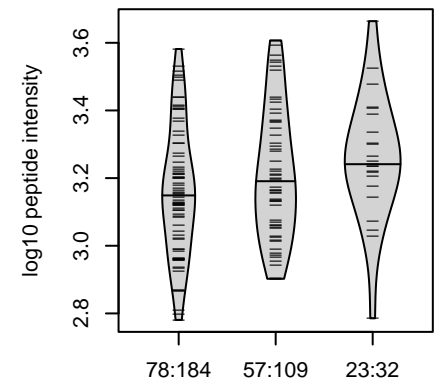

14:65796846:G:C\_G  
p = 0.03, beta = 0.233, N = 158

Assay Target: FUT8  
Olink UniProt: Q9BYC5  
UKB rsID: rs2127870  
Proxy rsID: rs2127870  
UKB SNP: 14:65796846:G:C  
Proxy SNP: 14:65796846:G:C  
UKB log10(p): 3097.8  
UKB BETA: -0.905  
\*\*\*\*\*-:-\*-:-\*\*\*\*\*-:-  
1233:1180:1104:1103:1050:979

**VMO1 : NP2  
Q7Z5L0**

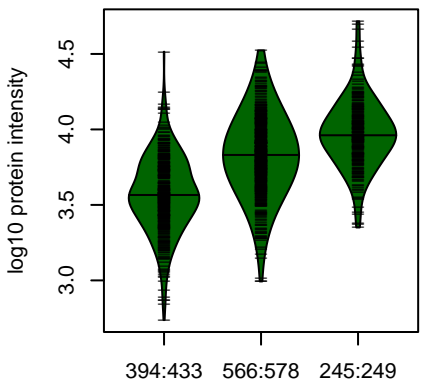

17:4690038:C:A\_A  
p = 3.5e-84, beta = 0.72, N = 1205

**GLGDDTALNDAR pc2  
Q7Z5L0**

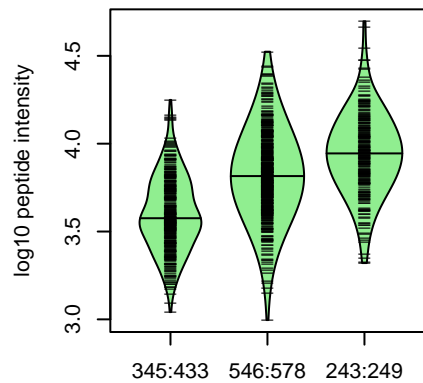

17:4690038:C:A\_A  
p = 9.3e-66, beta = 0.665, N = 1134

**VEAPTTLGDNTAANNVR pc2  
Q7Z5L0**

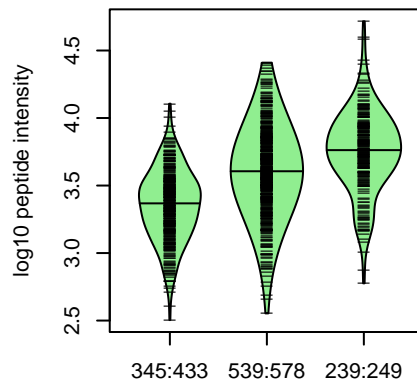

17:4690038:C:A\_A  
p = 9e-53, beta = 0.604, N = 1123

**GACGLQTK pc2  
Q7Z5L0**

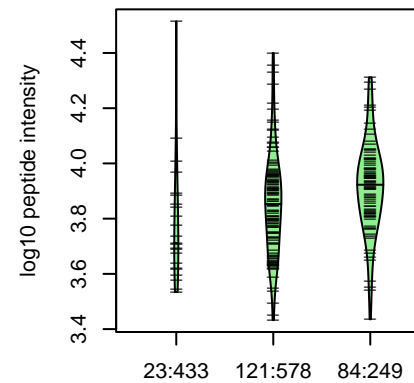

17:4690038:C:A\_A  
p = 0.00023, beta = 0.376, N = 228

**VEPPQGIPGDDTALNGIR pc2  
Q7Z5L0;Q7Z5L0-3;Q7Z5L0-4**

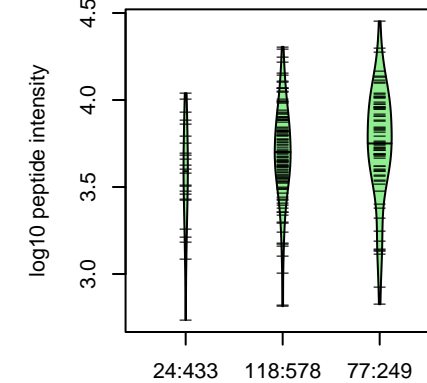

17:4690038:C:A\_A  
p = 0.012, beta = 0.261, N = 219

**VMO1 : NP2  
Q7Z5L0**

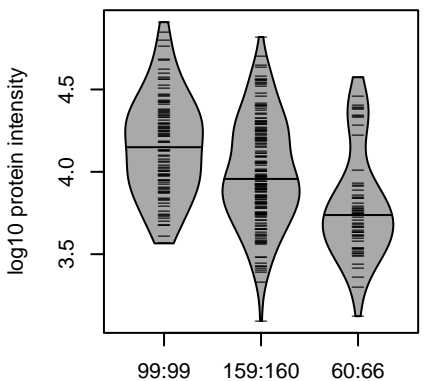

17:4690038:C:A\_C  
p = 7.6e-12, beta = -0.525, N = 318

**GLGDDTALNDAR pc2  
Q7Z5L0**

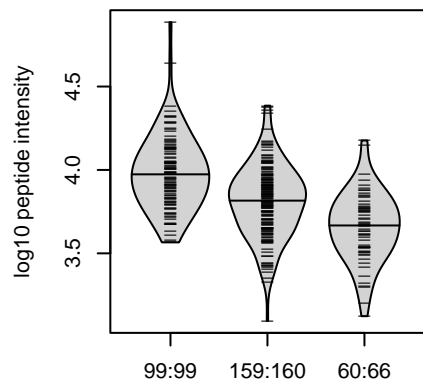

17:4690038:C:A\_C  
p = 1.4e-19, beta = -0.676, N = 318

**VEAPTTLGDNTAANNVR pc2  
Q7Z5L0**

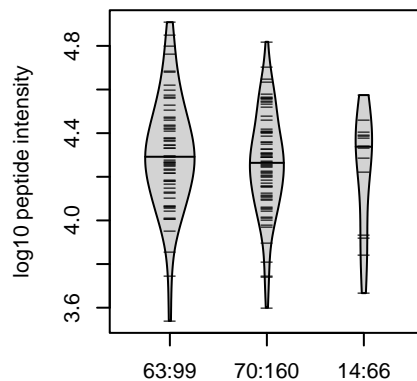

17:4690038:C:A\_C  
p = 0.12, beta = -0.194, N = 147

Assay Target: VMO1  
Olink UniProt: Q7Z5L0  
UKB rsID: rs8078118  
Proxy rsID: rs8078118  
UKB SNP: 17:4690038:C:A  
Proxy SNP: 17:4690038:C:A  
UKB log10(p): 3082.1  
UKB BETA: 0.732  
\*.\*.\*-\_-.\*  
1134:1123:228:219:144:132

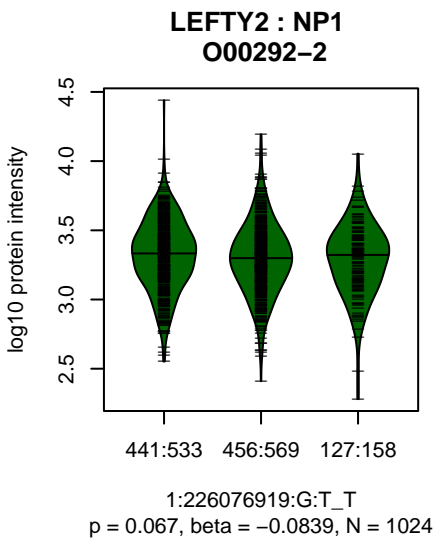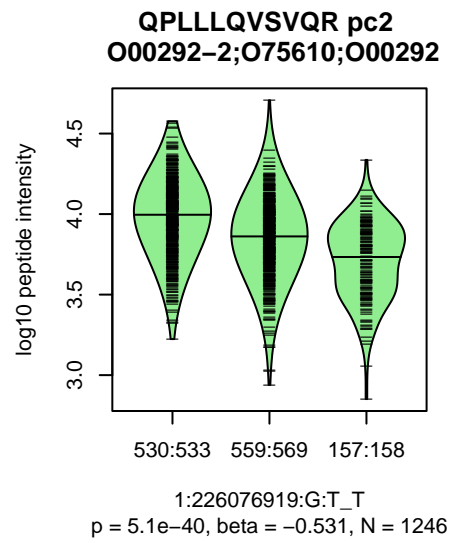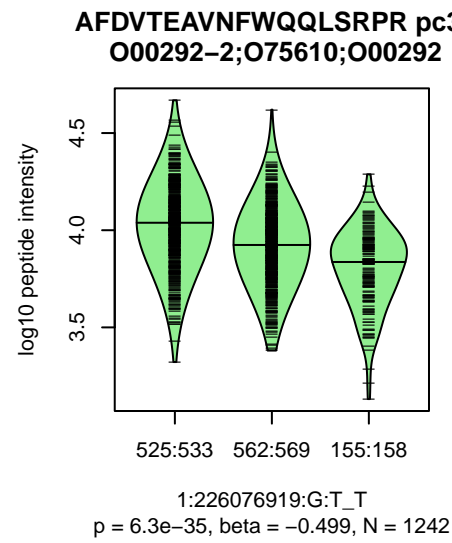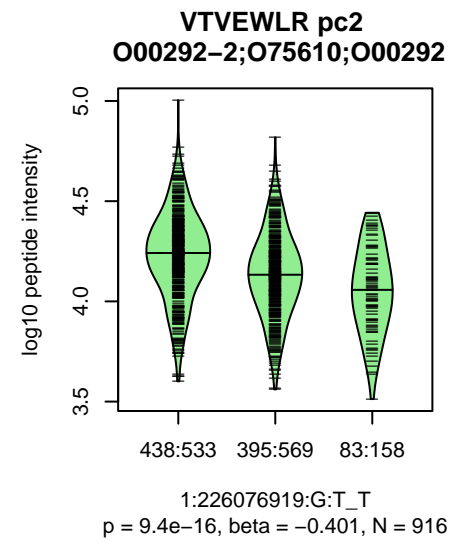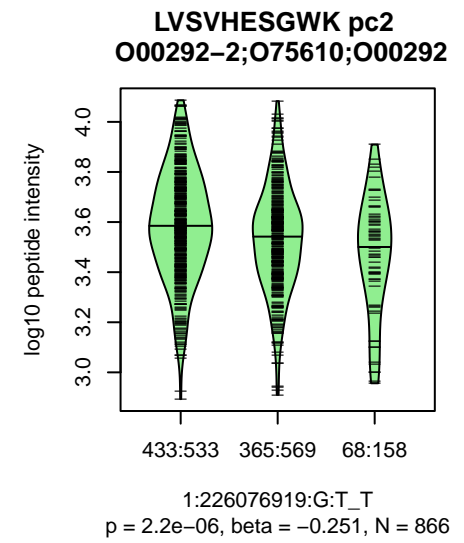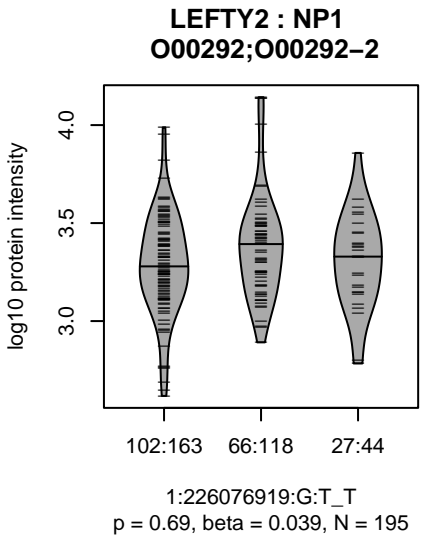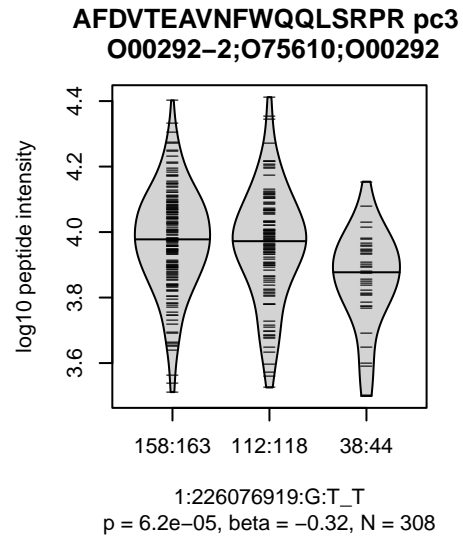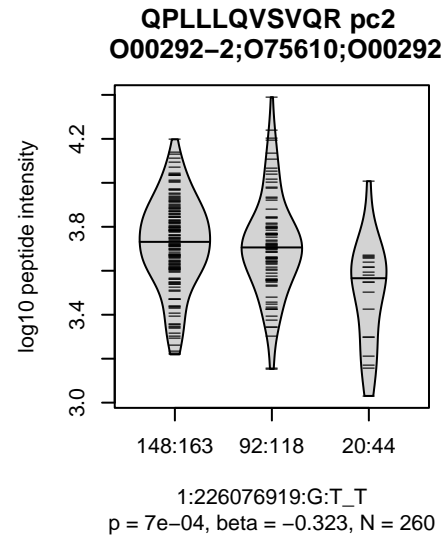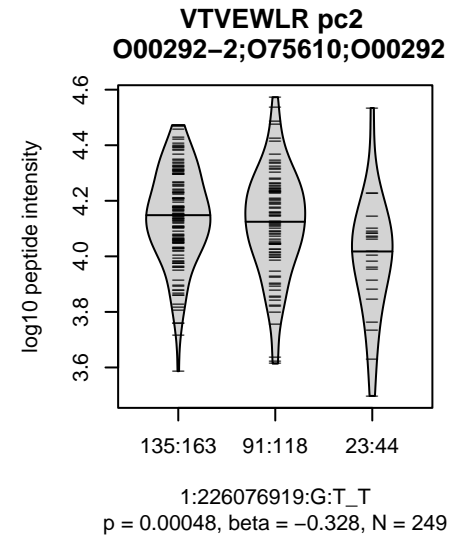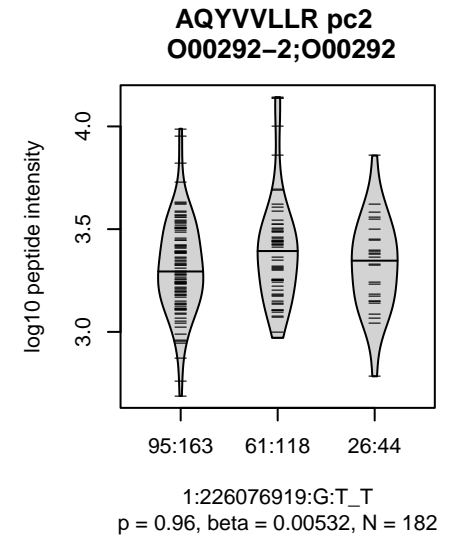

Assay Target: LEFTY2  
 Olink UniProt: O00292  
 UKB rsID: rs360058  
 Proxy rsID: rs360058  
 UKB SNP: 1:226076919:G:T  
 Proxy SNP: 1:226076919:G:T  
 UKB log10(p): 2990.7  
 UKB BETA: -0.709  
 \*\*\*:\*\*\*-:-:-:-:-  
 1246:1242:916:866:856:628:337

**TGOLN2 : NP2** **SGAEAQTPEDSPNR pc2** **SGAEEQGPIDGPSK pc2** **SSAEAQTPEDTPNK pc2** **SSEPTEDVEPK pc2**  
**A0A5F9UY30;O43493;O43493-5;O43493-5** **F9UY30;O43493;O43493-4;O43493-5** **F9UY30;O43493;O43493-4;O43493-5** **F9UY30;O43493;O43493-4;O43493-5** **F9UY30;O43493;O43493-4;O43493-5**

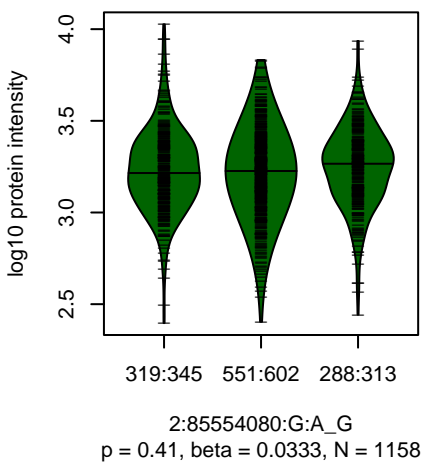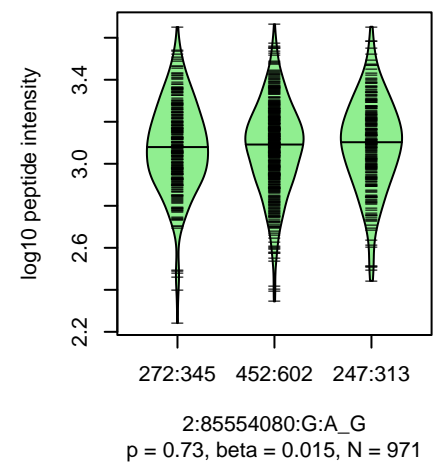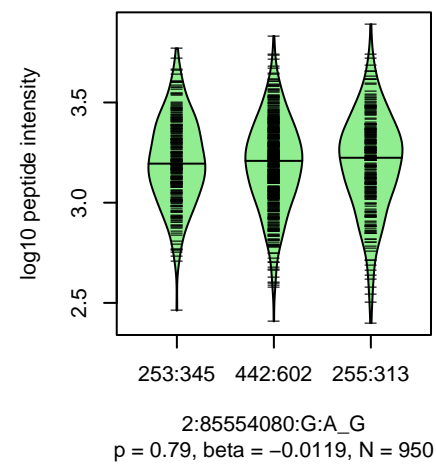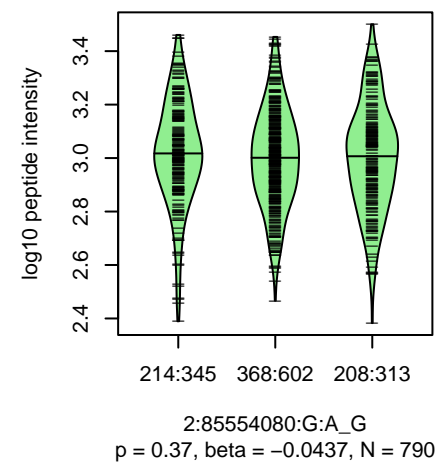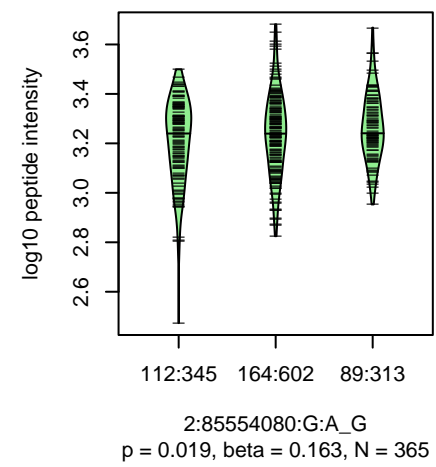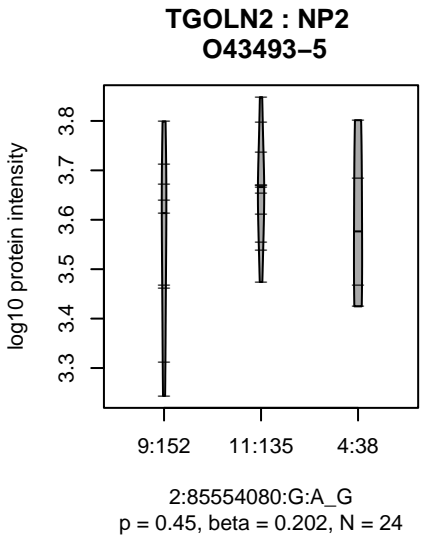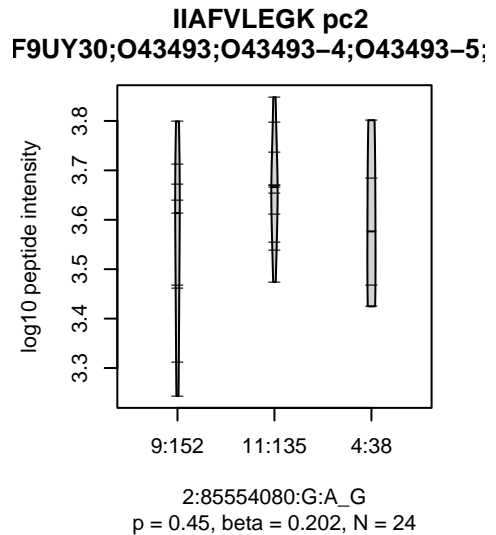

Assay Target: TGOLN2  
 Olink UniProt: O43493  
 UKB rsID: rs4247303  
 Proxy rsID: rs4247303  
 UKB SNP: 2:85554080:G:A  
 Proxy SNP: 2:85554080:G:A  
 UKB log10(p): 2870.9  
 UKB BETA: -0.688  
 -: -: -: -: NA  
 971:950:790:365:24:12

**CPVL : NP5  
Q9H3G5**

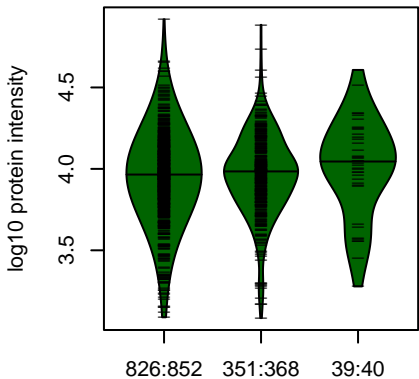

7:29160604:C:T\_T  
p = 0.16, beta = 0.0746, N = 1216

**FLSLPEVR pc2  
Q9H3G5**

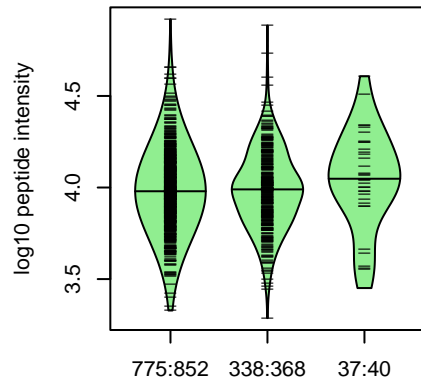

7:29160604:C:T\_T  
p = 0.44, beta = 0.0419, N = 1150

**NNDFYVTGESYAGK pc2  
Q9H3G5**

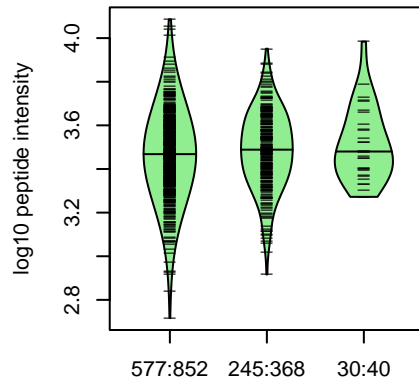

7:29160604:C:T\_T  
p = 0.06, beta = 0.117, N = 852

**QNWFEAFEILDK pc2  
Q9H3G5**

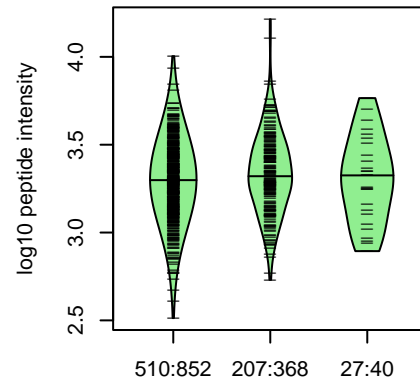

7:29160604:C:T\_T  
p = 0.21, beta = 0.0839, N = 744

**YVPAIAHLIHLNPNVR pc3  
Q9H3G5**

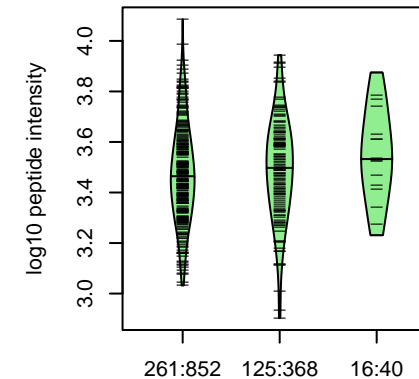

7:29160604:C:T\_T  
p = 0.086, beta = 0.15, N = 402

**CPVL : NP5  
Q9H3G5**

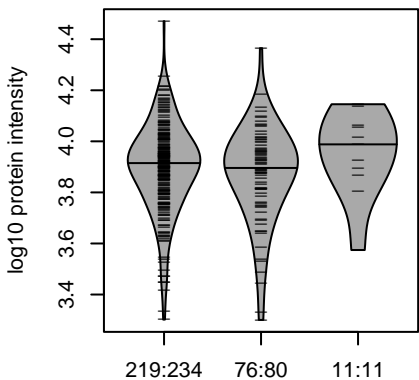

7:29160604:C:T\_T  
p = 0.7, beta = 0.0398, N = 306

**FLSLPEVR pc2  
Q9H3G5**

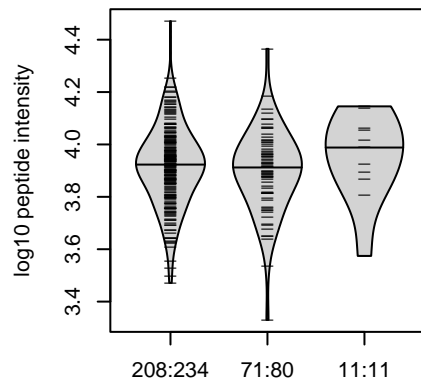

7:29160604:C:T\_T  
p = 0.78, beta = 0.0299, N = 290

**QNWFEAFEILDK pc2  
Q9H3G5**

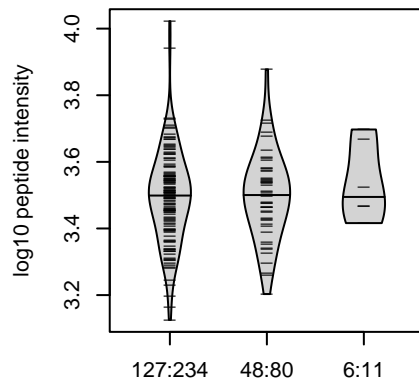

7:29160604:C:T\_T  
p = 0.48, beta = 0.0956, N = 181

**CTEPEDQLYYVK pc2  
Q9H3G5**

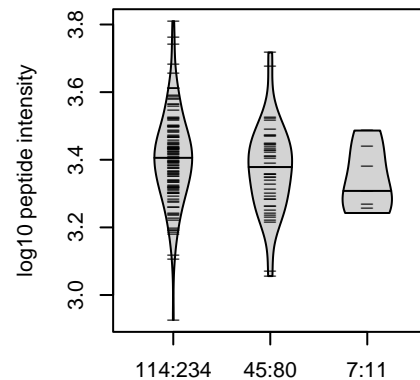

7:29160604:C:T\_T  
p = 0.033, beta = -0.288, N = 166

**NNDFYVTGESYAGK pc2  
Q9H3G5**

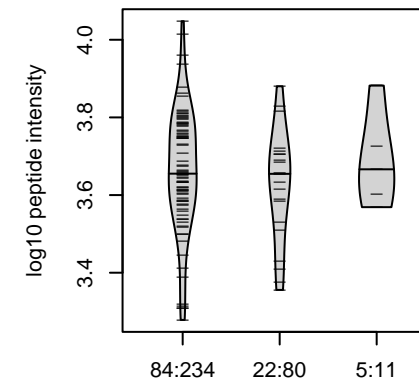

7:29160604:C:T\_T  
p = 0.2, beta = -0.219, N = 111

**VLIYNGQLDIIVAAALTER pc3  
rs1052200 REF**

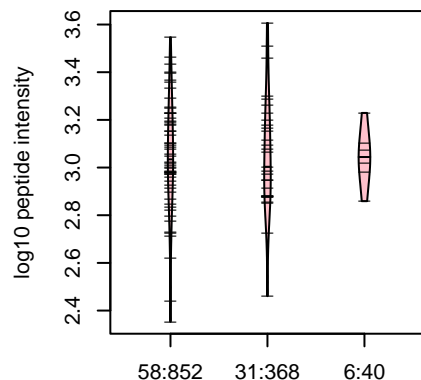

7:29160604:C:T\_T  
p = 0.12, model = DOM, N = 95

**QVGDFHQVIIR pc3  
rs7313 ALT**

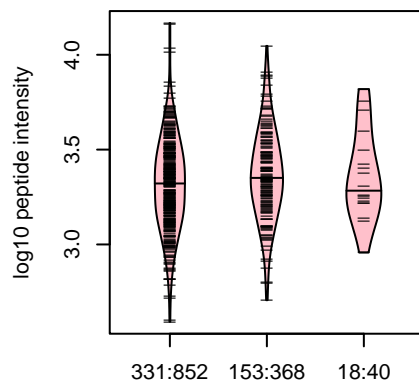

7:29160604:C:T\_T  
p = 0.33, model = REC, N = 502

**QAGDFHQVIIR pc3  
rs7313 REF**

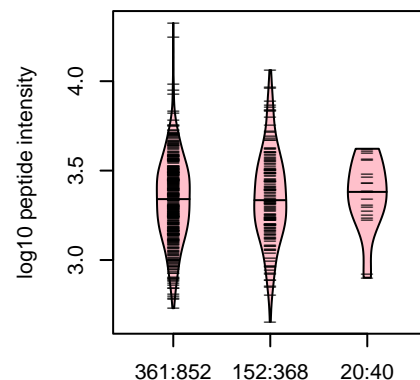

7:29160604:C:T\_T  
p = 0.33, model = DOM, N = 533

**QVGDFHQVIIR pc2  
rs7313 ALT**

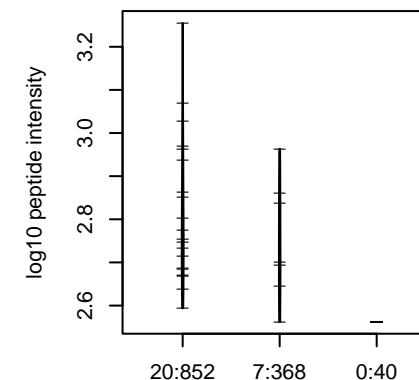

7:29160604:C:T\_T  
p = 0.54, model = REC, N = 27

Assay Target: CPVL  
Olink UniProt: Q9H3G5  
UKB rsID: rs34219043  
Proxy rsID: rs34219043  
UKB SNP: 7:29160604:C:T  
Proxy SNP: 7:29160604:C:T  
UKB log10(p): 2728.2  
UKB BETA: -0.842  
-----  
1150:852:744:402:399:345:90:4

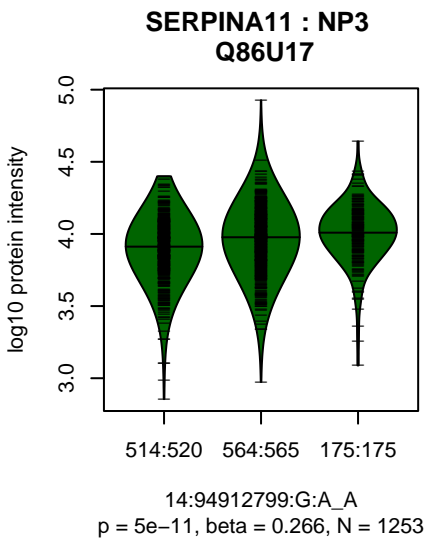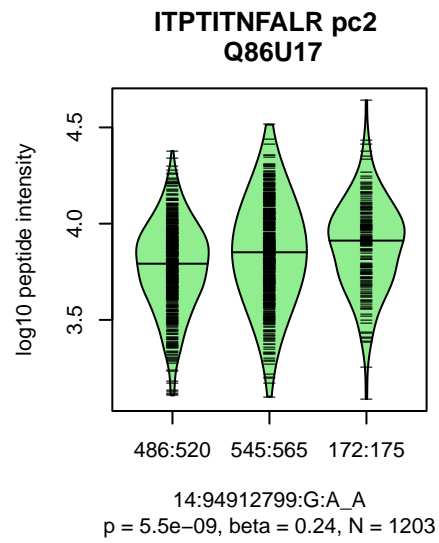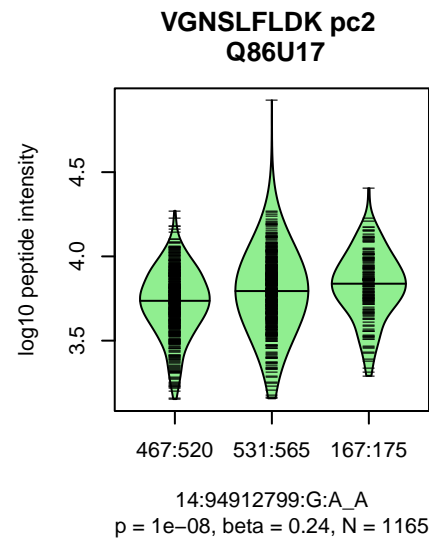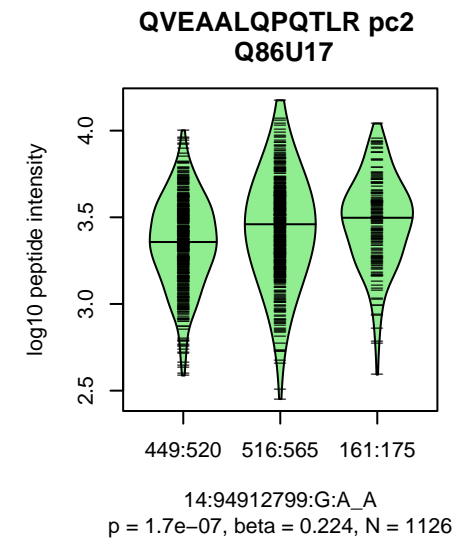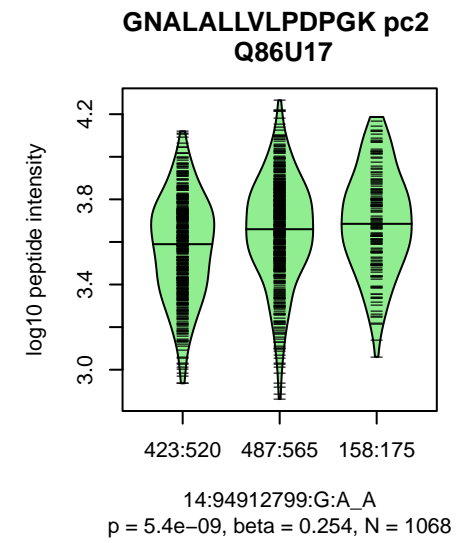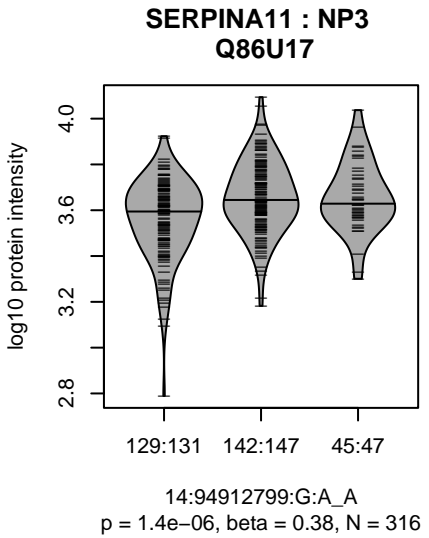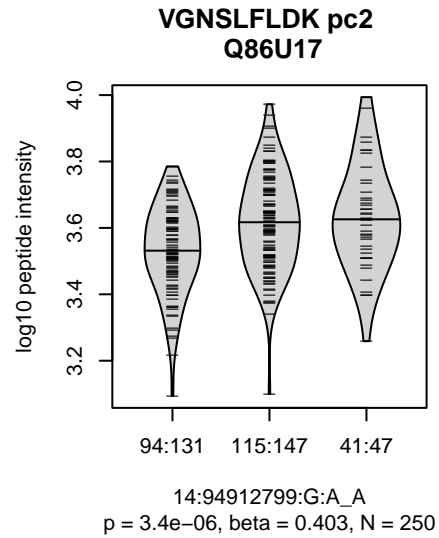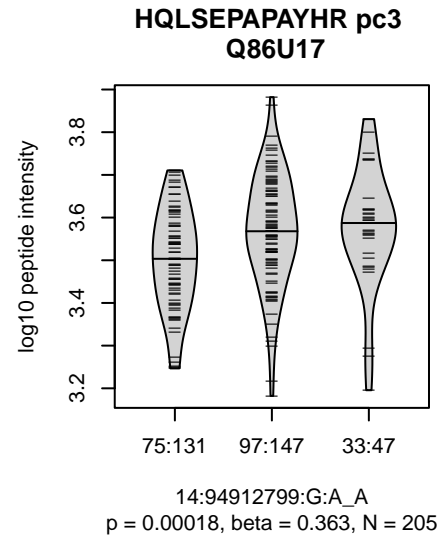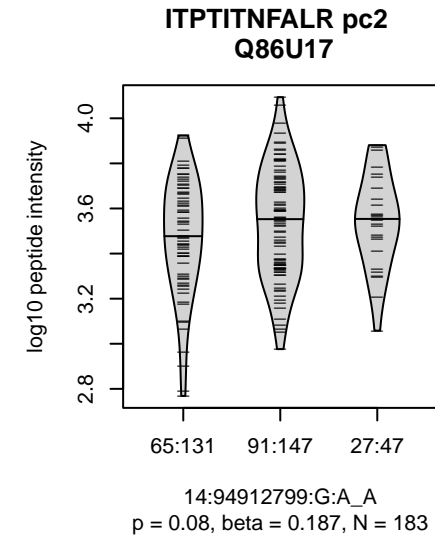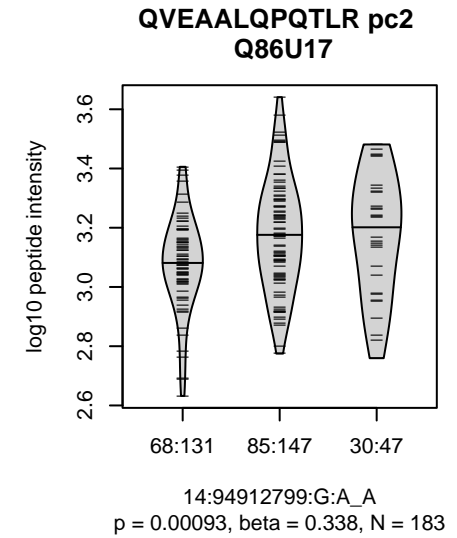

Assay Target: SERPINA11  
 Olink UniProt: Q86U17  
 UKB rsID: rs12888805  
 Proxy rsID: rs12888805  
 UKB SNP: 14:94912799:G:A  
 Proxy SNP: 14:94912799:G:A  
 UKB log10(p): 2705.6  
 UKB BETA: -0.625  
 \*\*\*\*\*NA  
 1203:1165:1126:1068:1019:931

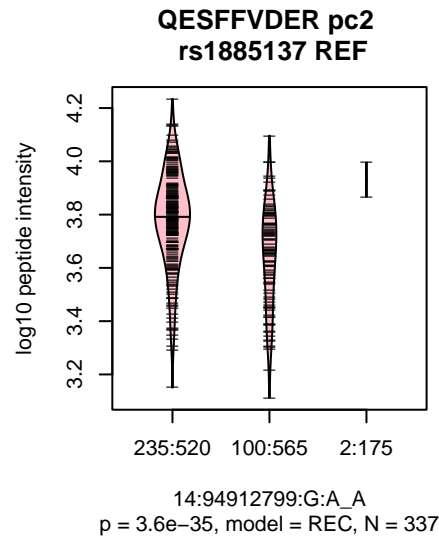

**SPARCL1 : NP2  
Q14515**

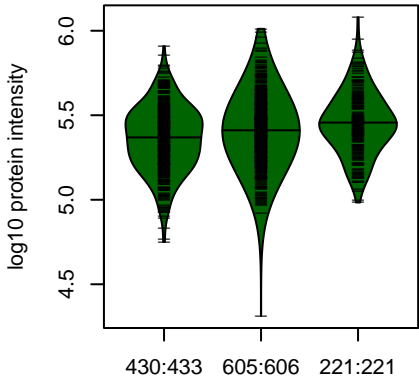

4:88413024:A:G\_G  
p = 8e-08, beta = 0.214, N = 1256

**AQSIAYHLK pc2  
Q14515;Q14515-2**

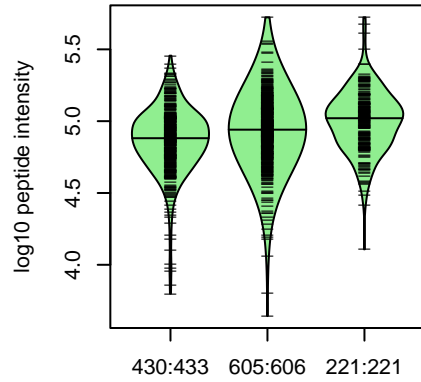

4:88413024:A:G\_G  
p = 3.3e-11, beta = 0.264, N = 1256

**ASLVPMEHCITR pc3  
Q14515;Q14515-2**

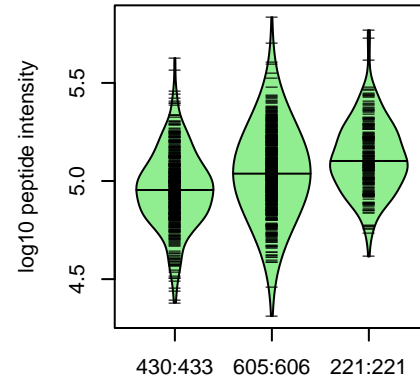

4:88413024:A:G\_G  
p = 6.7e-22, beta = 0.379, N = 1256

**GHQLQLDYFGACK pc3  
Q14515;Q14515-2**

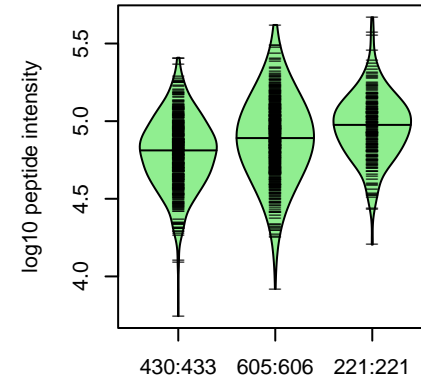

4:88413024:A:G\_G  
p = 1.9e-16, beta = 0.326, N = 1256

**LLAGDHPIDLLLR pc3  
Q14515;Q14515-2**

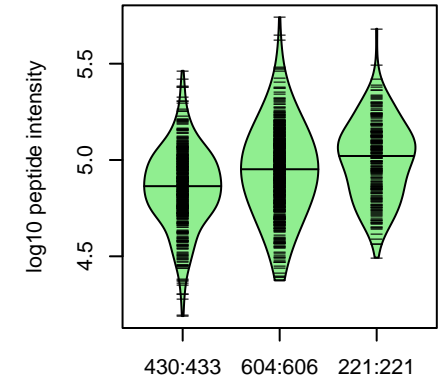

4:88413024:A:G\_G  
p = 1.8e-15, beta = 0.315, N = 1255

**SPARCL1 : NP2  
Q14515**

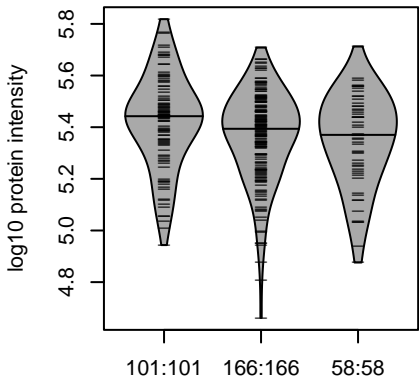

4:88413024:A:G\_A  
p = 0.0074, beta = -0.213, N = 325

**AQSIAYHLK pc2  
Q14515;Q14515-2**

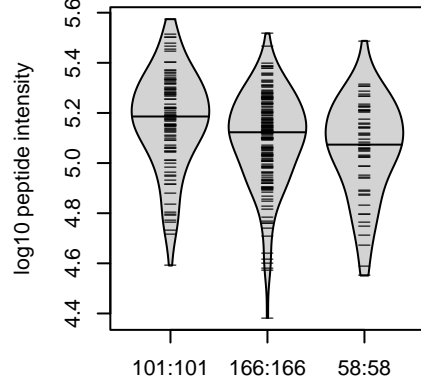

4:88413024:A:G\_A  
p = 8.1e-05, beta = -0.311, N = 325

**ASLVPMEHCITR pc2  
Q14515;Q14515-2**

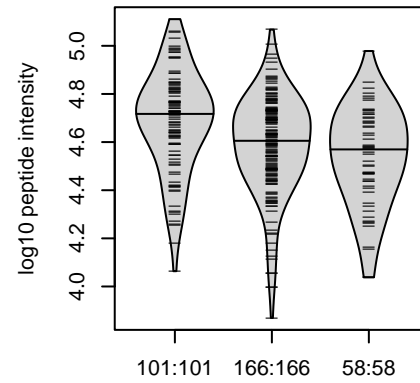

4:88413024:A:G\_A  
p = 3.4e-06, beta = -0.365, N = 325

**EDMSEPQEK pc2  
Q14515**

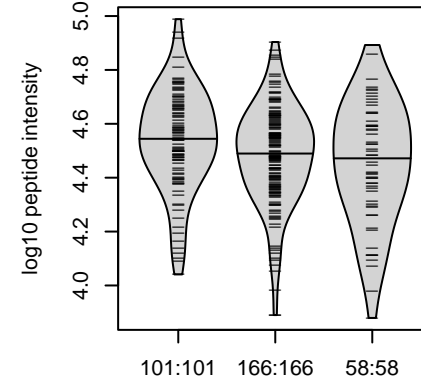

4:88413024:A:G\_A  
p = 0.0068, beta = -0.215, N = 325

**FFEECDPNK pc2  
Q14515;Q14515-2**

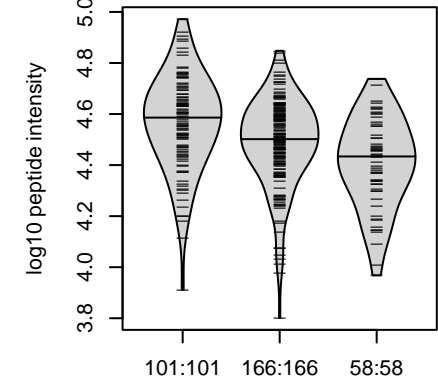

4:88413024:A:G\_A  
p = 1e-07, beta = -0.416, N = 325

**KAENSSNEEETSSEGNMR pc3  
rs1130643 REF**

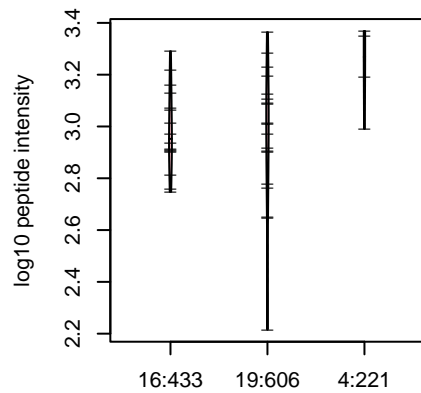

4:88413024:A:G\_G  
p = 0.29, model = DOM, N = 39

Assay Target: SPARCL1  
Olink UniProt: Q14515  
UKB rsID: rs56273319  
Proxy rsID: rs56273319  
UKB SNP: 4:88413024:A:G  
Proxy SNP: 4:88413024:A:G  
UKB log10(p): 2645.3  
UKB BETA: 0.701  
\*\*\*\*\*  
1256:1256:1256:1255:1255:125



**CFHR4 : NP5**  
**Q92496;Q92496-2**

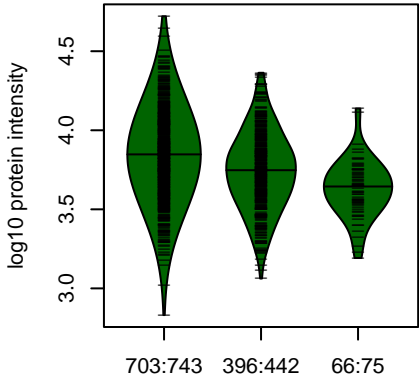

1:196877689:C:G\_G  
 p = 1.8e-14, beta = -0.367, N = 1165

**TGDTIEFMCK pc2**  
**2985;Q02985-2;Q92496;Q92496-2;Q9**

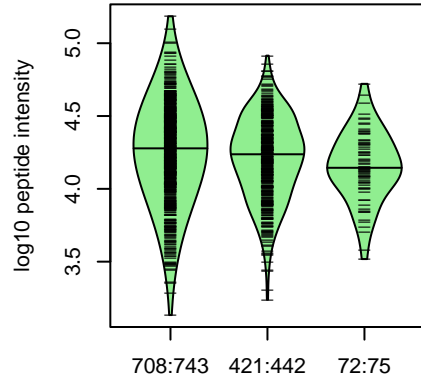

1:196877689:C:G\_G  
 p = 7.2e-05, beta = -0.187, N = 1201

**FCDMPVFENSR pc2**  
**Q92496;Q92496-2;Q92496-3**

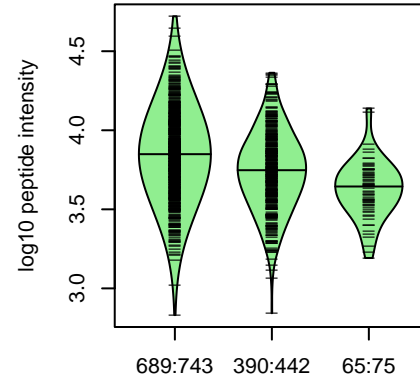

1:196877689:C:G\_G  
 p = 3.3e-15, beta = -0.381, N = 1144

**CIHPCIITEENMNK pc3**  
**2985;Q02985-2;Q92496;Q92496-2;Q92985;Q02985-2;Q92496;Q92496-2;Q9**

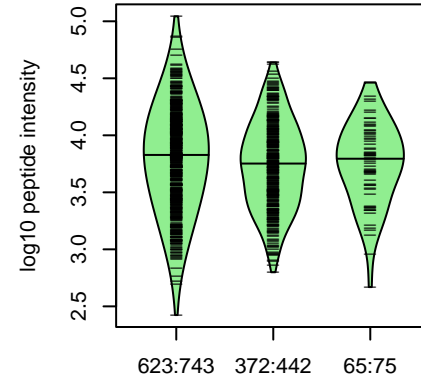

1:196877689:C:G\_G  
 p = 0.0067, beta = -0.136, N = 1060

**VYVPQSR pc2**  
**2985;Q02985-2;Q92496;Q92496-2;Q9**

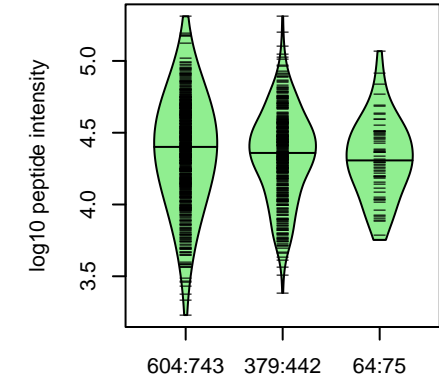

1:196877689:C:G\_G  
 p = 0.046, beta = -0.101, N = 1047

**CFHR4 : NP5**  
**Q92496;Q92496-2**

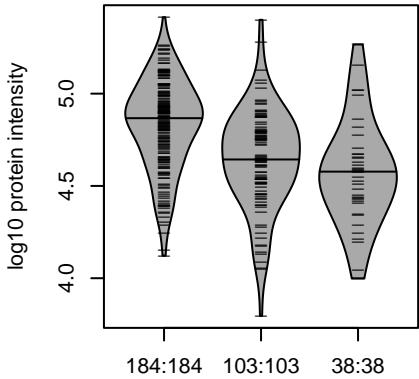

1:196877689:C:G\_G  
 p = 3.3e-07, beta = -0.396, N = 325

**FCDMPVFENSR pc2**  
**Q92496;Q92496-2;Q92496-3**

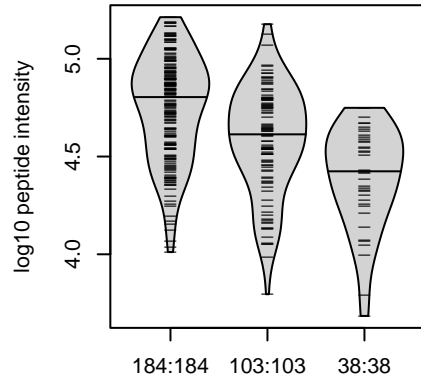

1:196877689:C:G\_G  
 p = 4.9e-06, beta = -0.356, N = 325

**TGDTIEFMCK pc2**  
**2985;Q02985-2;Q92496;Q92496-2;Q92985;Q02985-2;Q92496;Q92496-2;Q9**

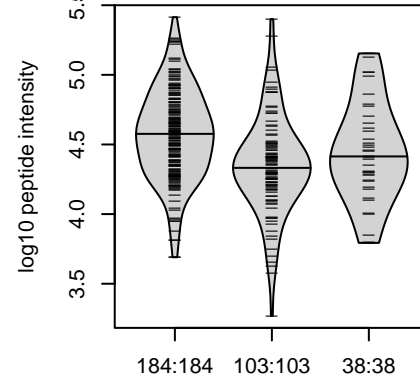

1:196877689:C:G\_G  
 p = 2.5e-05, beta = -0.329, N = 325

**CIHPCIITEENMNK pc3**  
**Q92496;Q92496-2**

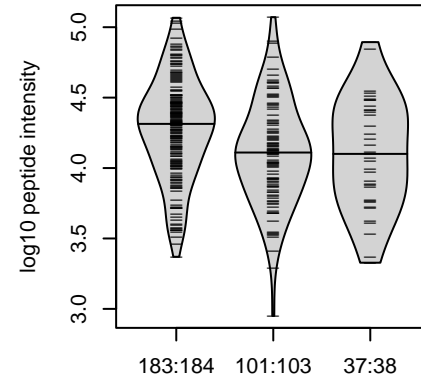

1:196877689:C:G\_G  
 p = 3.4e-05, beta = -0.326, N = 321

**VYLPWSR pc2**  
**Q92496;Q92496-2**

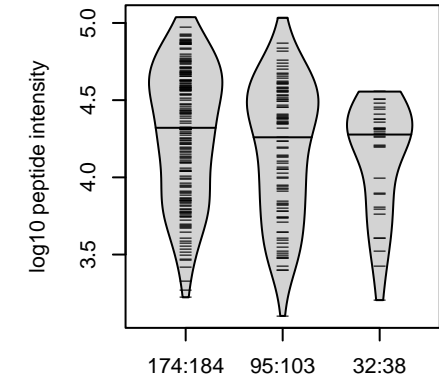

1:196877689:C:G\_G  
 p = 0.1, beta = -0.136, N = 301

Assay Target: CFHR4  
 Olink UniProt: Q92496  
 UKB rsID: rs10922147  
 Proxy rsID: rs10922147  
 UKB SNP: 1:196877689:C:G  
 Proxy SNP: 1:196877689:C:G  
 UKB log10(p): 2512.3  
 UKB BETA: -0.785  
 \*.\*.\*-.\*.\*-.-  
 1201:1144:1060:1047:690:585:1



**LBP : NP4**  
**P18428**

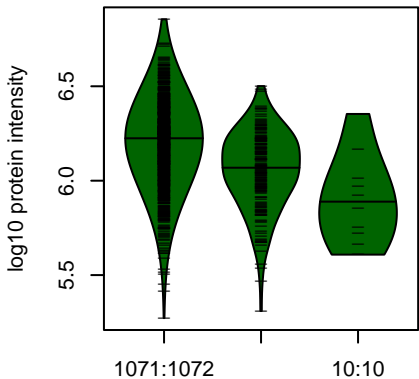

20:36997655:C:T\_T  
p = 8.3e-20, beta = -0.653, N = 1259

**ATAQMLEVMFK pc2**  
**P18428**

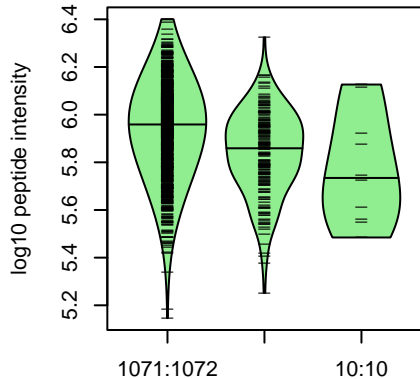

20:36997655:C:T\_T  
p = 1.2e-12, beta = -0.513, N = 1259

**DFLFLGANVQYMR pc2**  
**P18428**

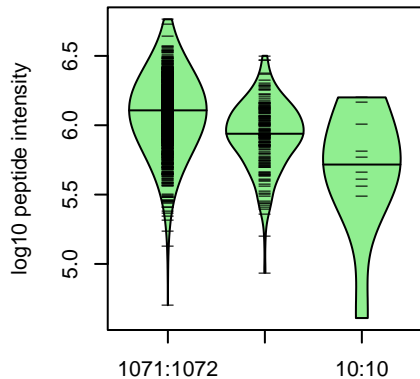

20:36997655:C:T\_T  
p = 5.6e-19, beta = -0.638, N = 1259

**ICEMIQQ pc2**  
**P18428**

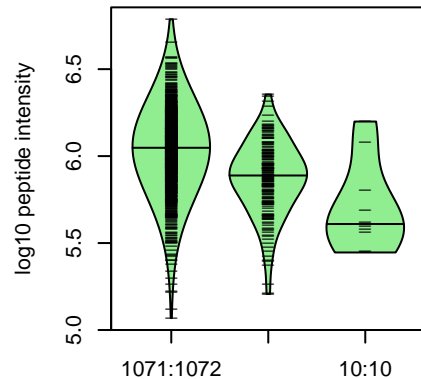

20:36997655:C:T\_T  
p = 1.7e-22, beta = -0.698, N = 1259

**ITLPDFTGDLR pc2**  
**P18428**

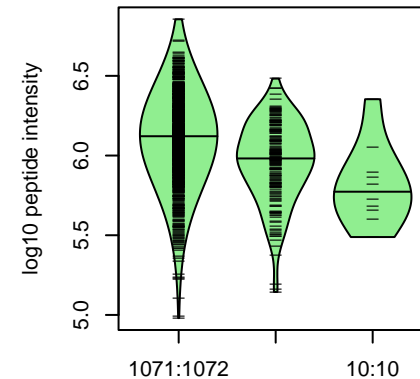

20:36997655:C:T\_T  
p = 3.9e-13, beta = -0.523, N = 1259

**LBP : NP4**  
**P18428**

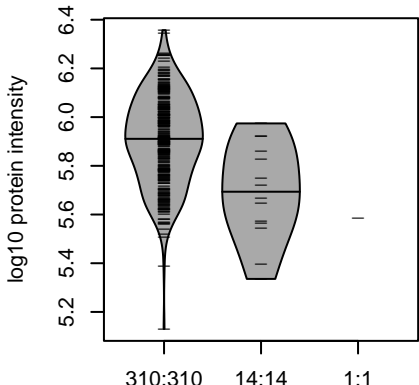

20:36997655:C:T\_T  
p = 2.3e-05, beta = -0.995, N = 325

**ATAQMLEVMFK pc2**  
**P18428**

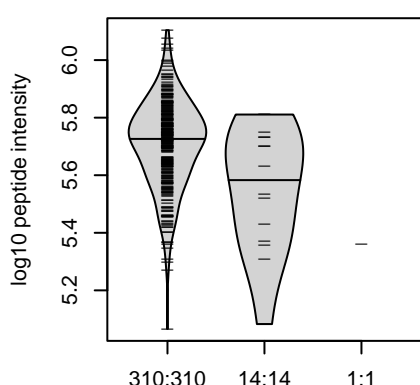

20:36997655:C:T\_T  
p = 2e-04, beta = -0.877, N = 325

**DFLFLGANVQYMR pc2**  
**P18428**

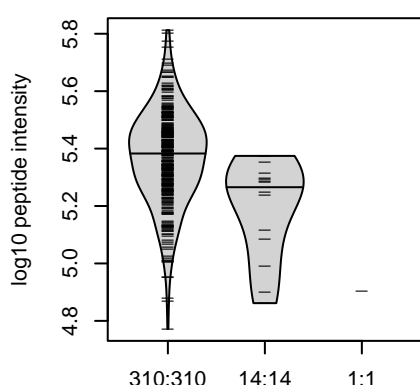

20:36997655:C:T\_T  
p = 2.9e-05, beta = -0.983, N = 325

**ICEMIQQ pc2**  
**P18428**

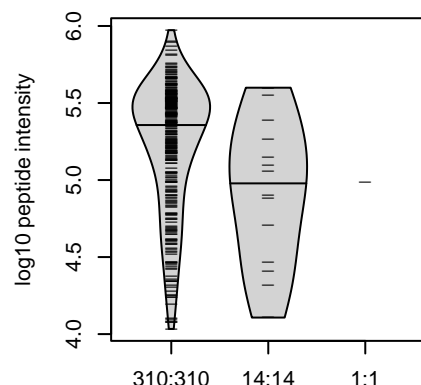

20:36997655:C:T\_T  
p = 0.059, beta = -0.449, N = 325

**ITLPDFTGDLRIPHVGR pc4**  
**P18428**

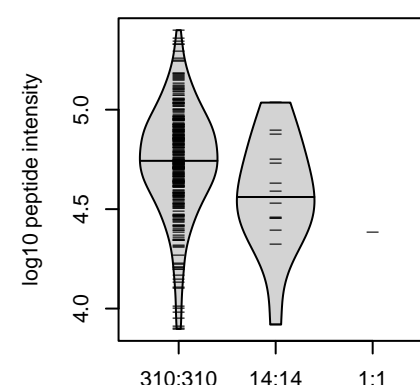

20:36997655:C:T\_T  
p = 0.013, beta = -0.591, N = 325

**VGLFNAELLEALLNYYILNTLYPK pc** **VGLFNAELLEALLNYYILNTFYPK pc**  
**rs2232618 ALT** **rs2232618 REF**

Assay Target: LBP  
Olink UniProt: P18428  
UKB rsID: rs2232613  
Proxy rsID: rs2232613  
UKB SNP: 20:36997655:C:T  
Proxy SNP: 20:36997655:C:T  
UKB log10(p): 2409.8  
UKB BETA: -1.174  
\*\*\*\*\*  
1259:1259:1259:1259:1259:125

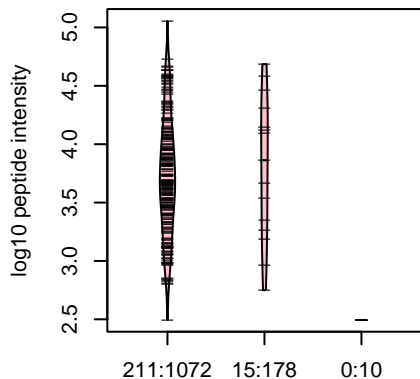

20:36997655:C:T\_T  
p = 5e-05, model = REC, N = 226

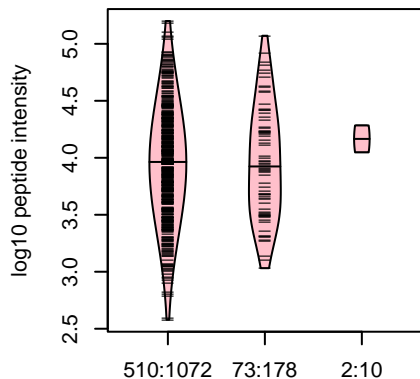

20:36997655:C:T\_T  
p = 0.057, model = REC, N = 585

**FGL1 : NP5**  
**Q08830**

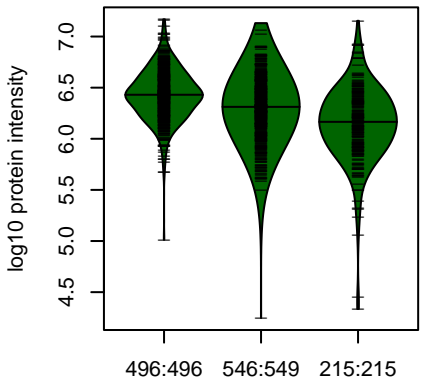

8:17742929:A:G\_A  
p = 6.5e-29, beta = -0.426, N = 1257

**IRPNDFIPNVI pc2**  
**Q08830**

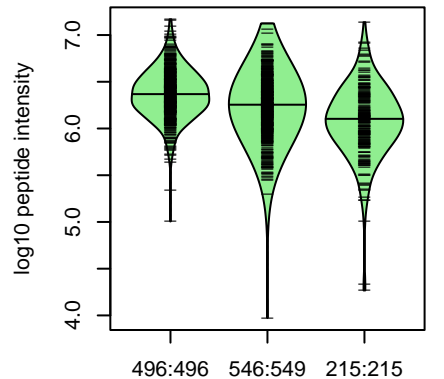

8:17742929:A:G\_A  
p = 9.2e-27, beta = -0.41, N = 1257

**QLLQENEVQFLDK pc2**  
**Q08830**

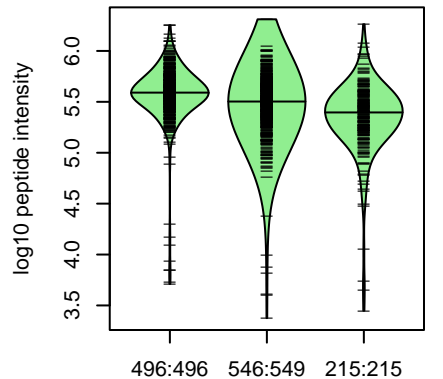

8:17742929:A:G\_A  
p = 6e-24, beta = -0.387, N = 1257

**SDGSENFNR pc2**  
**Q08830**

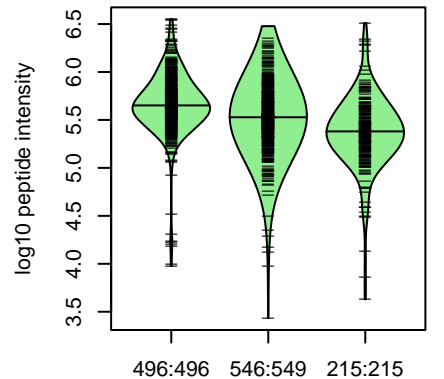

8:17742929:A:G\_A  
p = 7.8e-27, beta = -0.41, N = 1257

**IDLADFEK pc2**  
**Q08830**

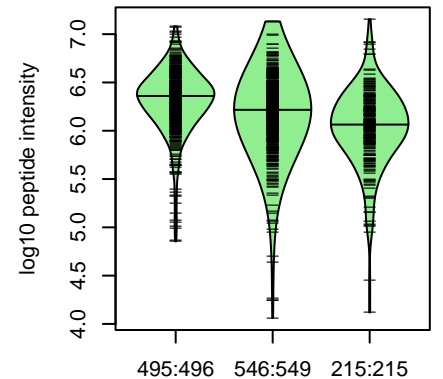

8:17742929:A:G\_A  
p = 2.2e-19, beta = -0.347, N = 1256

**FGL1 : NP5**  
**Q08830**

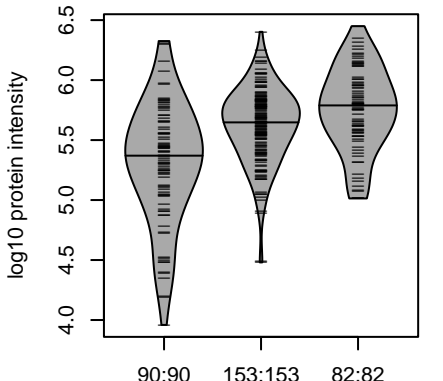

8:17742929:A:G\_G  
p = 4.4e-11, beta = 0.481, N = 325

**IRPNDFIPNVI pc2**  
**Q08830**

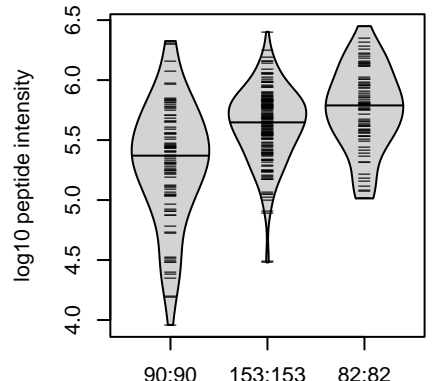

8:17742929:A:G\_G  
p = 4.3e-11, beta = 0.481, N = 325

**NLHFLTQEDYTLK pc3**  
**Q08830**

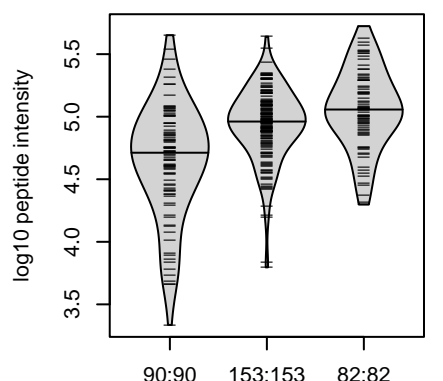

8:17742929:A:G\_G  
p = 9e-12, beta = 0.496, N = 325

**QLLQENEVQFLDK pc2**  
**Q08830**

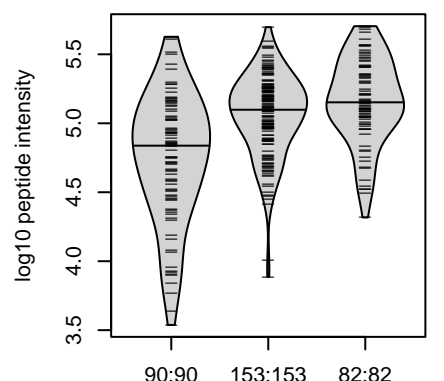

8:17742929:A:G\_G  
p = 1.6e-11, beta = 0.491, N = 325

**DYENGFGNFVQK pc2**  
**Q08830**

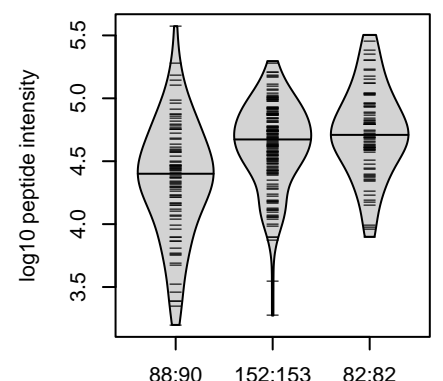

8:17742929:A:G\_G  
p = 2.6e-08, beta = 0.412, N = 322

Assay Target: FGL1  
Olink UniProt: Q08830  
UKB rsID: rs2073562  
Proxy rsID: rs2073562  
UKB SNP: 8:17742929:A:G  
Proxy SNP: 8:17742929:A:G  
UKB log10(p): 2388.3  
UKB BETA: 0.653  
\*\*\*\*\*:NA  
1257:1257:1257:1256:1256:125

**GDENTVIDLGSK pc2**  
**rs3739406 REF**

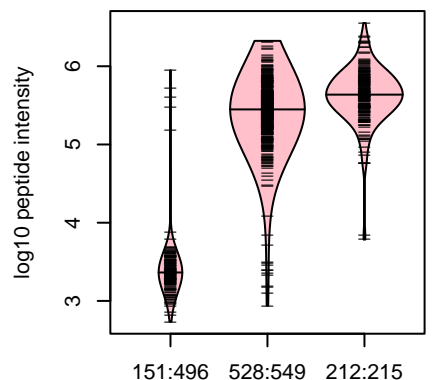

8:17742929:A:G\_A  
p = 8.7e-154, model = REC, N = 891

**GDENTVVDLGSK pc2**  
**rs3739406 ALT**

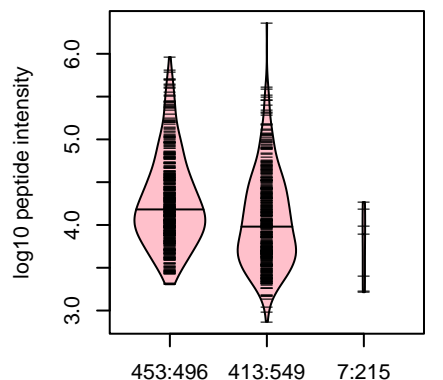

8:17742929:A:G\_A  
p = 1.1e-117, model = DOM, N = 873

**GDENTVIDLGSKR pc2**  
**rs3739406 REF**

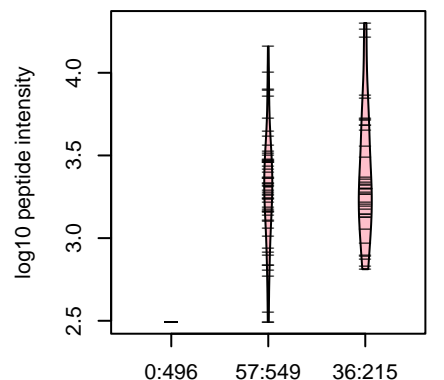

8:17742929:A:G\_A  
p = 1.2e-21, model = REC, N = 93

**GDENTVVDLGSKR pc2**  
**rs3739406 ALT**

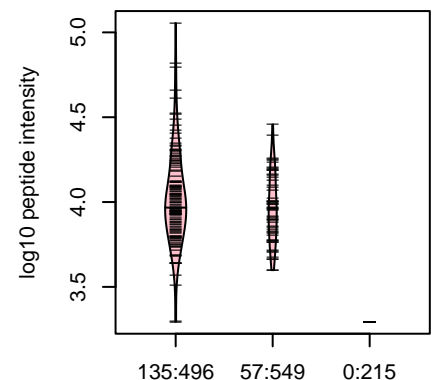

8:17742929:A:G\_A  
p = 4.3e-21, model = REC, N = 192



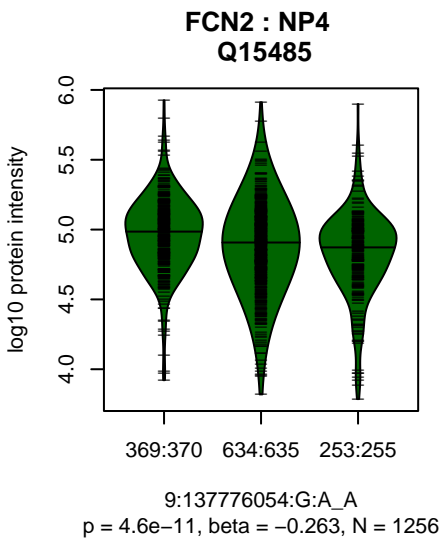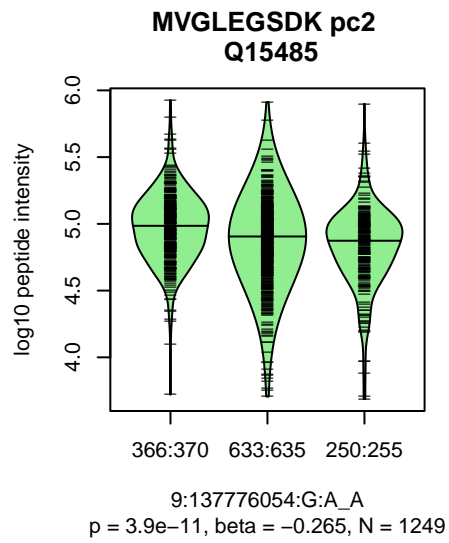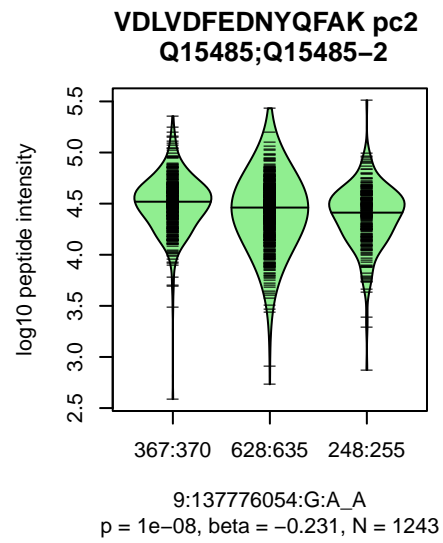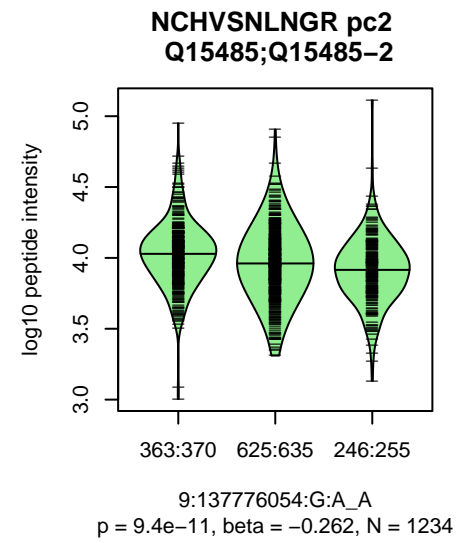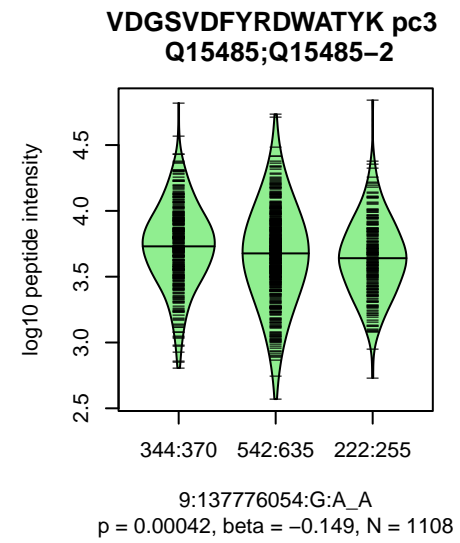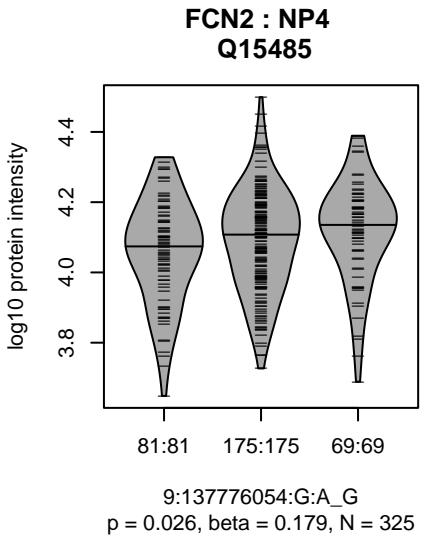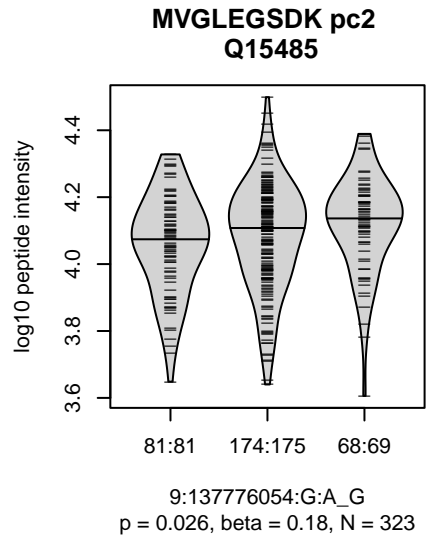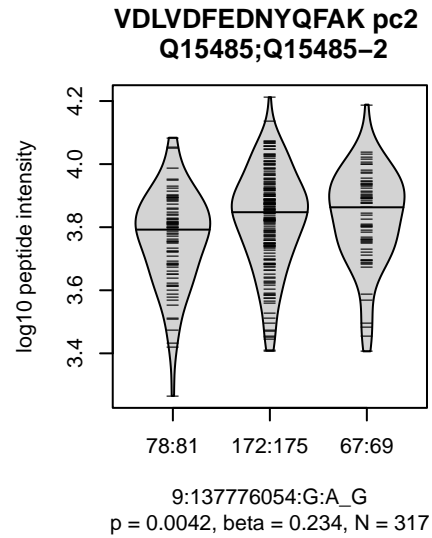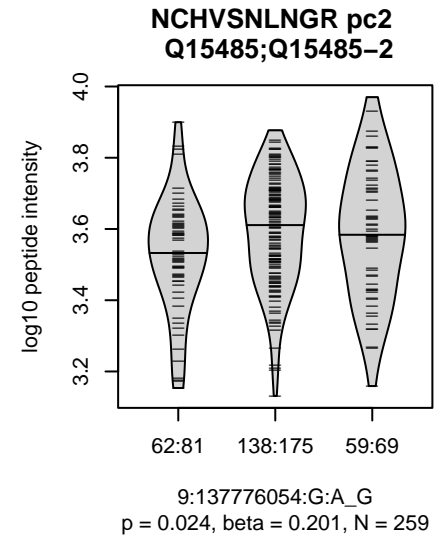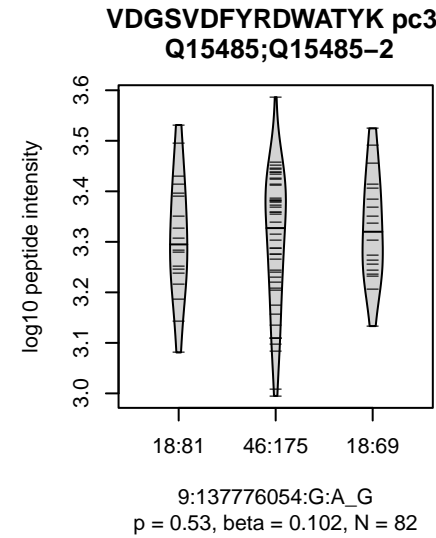

**DQDNDLNTGNCVAVMFQGAWWYK p  
rs7851696 REF**

Assay Target: FCN2  
Olink UniProt: Q15485  
UKB rsID: rs7041446  
Proxy rsID: rs7041446  
UKB SNP: 9:137776054:G:A  
Proxy SNP: 9:137776054:G:A  
UKB log10(p): 2254.7  
UKB BETA: -0.615  
\*.\*.\*.\*.\*-.-.-.-.-  
1249:1243:1234:1108:1023:948

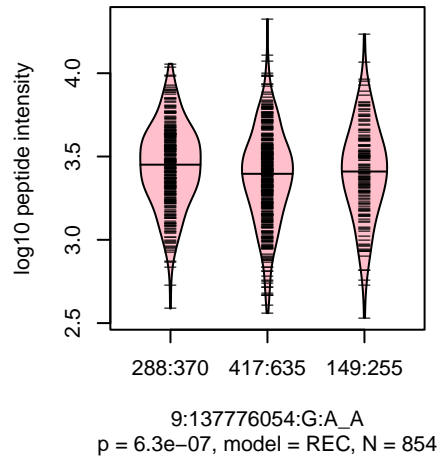

**LAMB1 : NP2  
P07942**

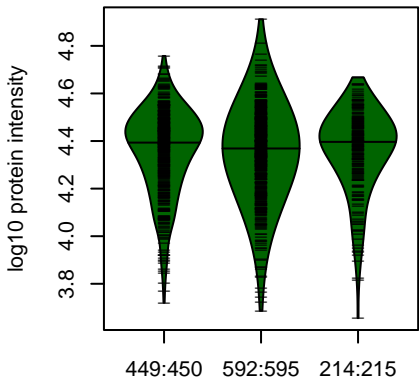

7:107744217:A:G\_G  
p = 0.9, beta = -0.00528, N = 1255

**LHTLGDNLLDSR pc3**

7:107744217:A:G\_G; A0A7I2V407; A0A7I2V4J9; A0A7I2V5A0A7I2V3J7; A0A7I2V4J9; A0A7I2V5X5; A0A7I2V4J9; A0A7I2V5X5; G3XAI2; P017; A0A7I2V407; A0A7I2V4J9; A0A7I2V5

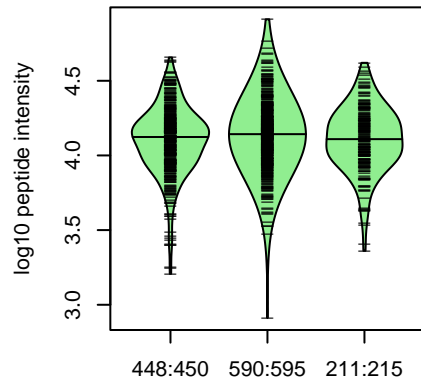

7:107744217:A:G\_G  
p = 0.26, beta = 0.0451, N = 1249

**ELAEQLEFIK pc2**

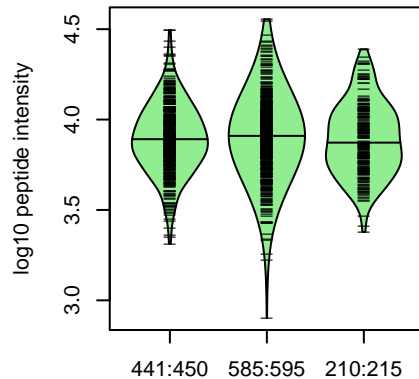

7:107744217:A:G\_G  
p = 0.92, beta = 0.00389, N = 1236

**QSAEDILLK pc2**

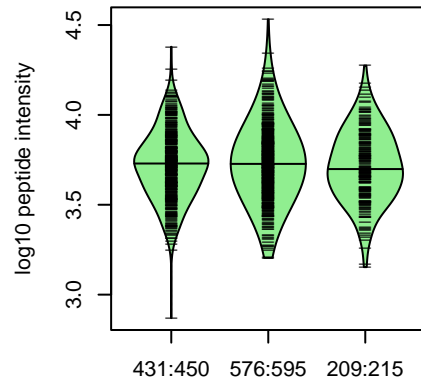

7:107744217:A:G\_G  
p = 0.88, beta = -0.00617, N = 1216

**YSDIEPSTEGEVIFR pc2**

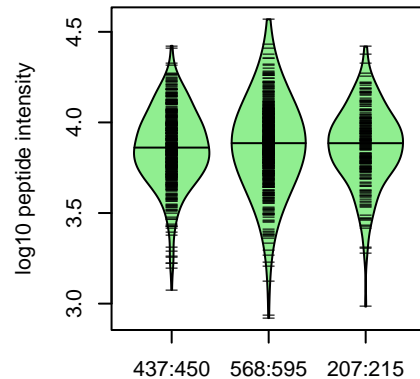

7:107744217:A:G\_G  
p = 0.57, beta = 0.0233, N = 1212

**LAMB1 : NP2  
A0A7I2V4J9;P07942**

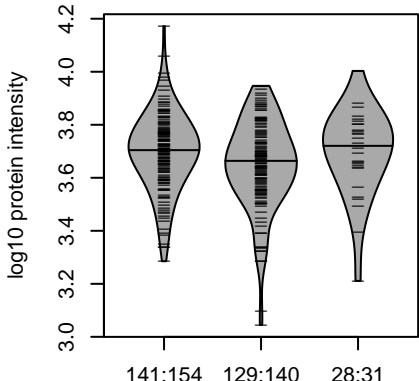

7:107744217:A:G\_G  
p = 0.1, beta = -0.143, N = 298

**LHTLGDNLLDSR pc3**

7:107744217:A:G\_G; A0A7I2V407; A0A7I2V4J9; A0A7I2V57; A0A7I2V407; A0A7I2V4J9; A0A7I2V5

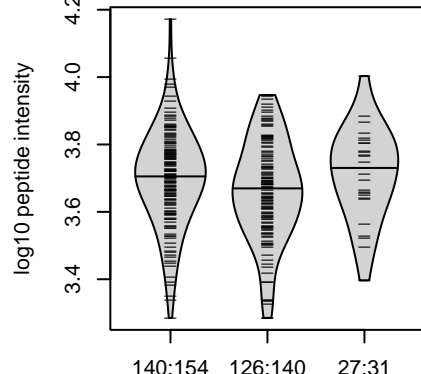

7:107744217:A:G\_G  
p = 0.21, beta = -0.11, N = 293

**YSDIEPSTEGEVIFR pc2**

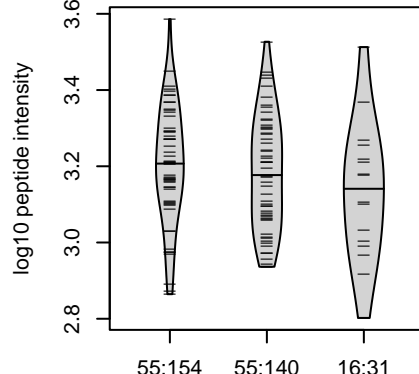

7:107744217:A:G\_G  
p = 0.11, beta = -0.205, N = 126

**FGYYGDALQQDCRK pc3  
rs20556 REF**

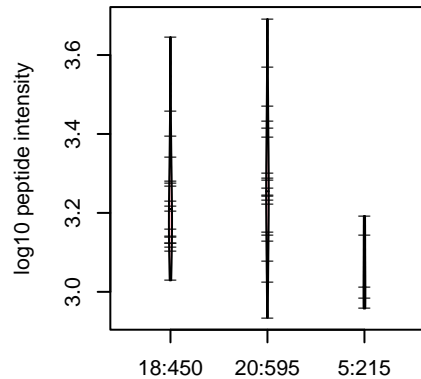

7:107744217:A:G\_G  
p = 0.41, model = DOM, N = 43

**FGYYGDALQQDCR pc2  
rs20556 REF**

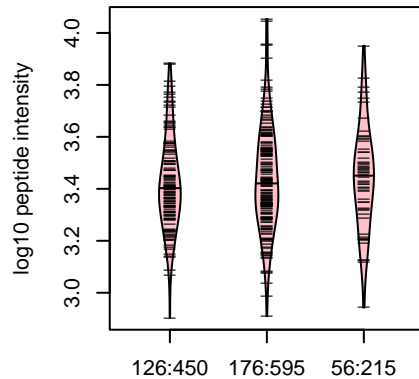

7:107744217:A:G\_G  
p = 0.45, model = DOM, N = 358

**FGYYGDALR pc2  
rs20556 ALT**

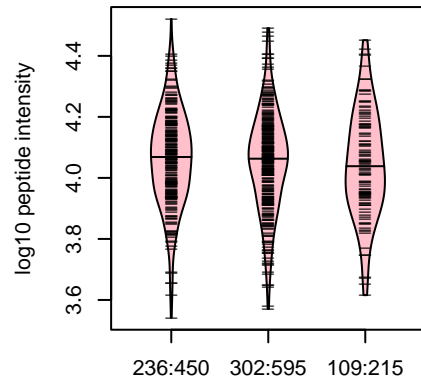

7:107744217:A:G\_G  
p = 0.6, model = REC, N = 647

Assay Target: LAMB1  
Olink UniProt: P07942  
UKB rsID: rs403731  
Proxy rsID: rs403731  
UKB SNP: 7:107744217:A:G  
Proxy SNP: 7:107744217:A:G  
UKB log10(p): 2217.9  
UKB BETA: -0.625  
-----  
1249:1236:1216:1212:1211:120

**FUCA1 : NP5  
P04066**

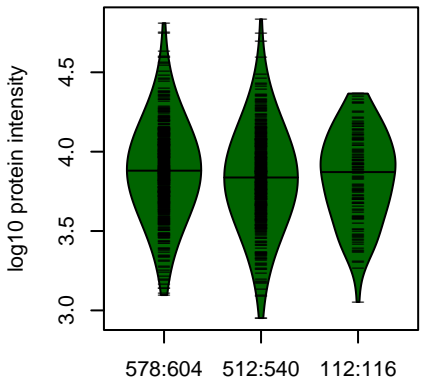

1:24180962:T:C\_C  
 $p = 0.027$ ,  $\beta = -0.0977$ ,  $N = 1202$

**ITMLGIQDLK pc2  
P04066**

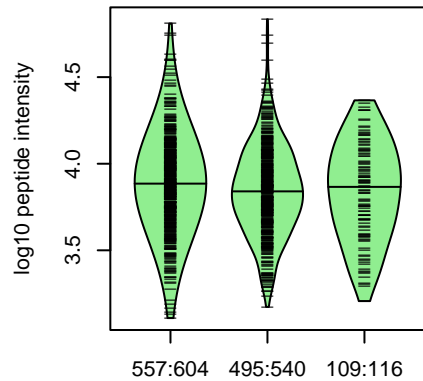

1:24180962:T:C\_C  
 $p = 0.021$ ,  $\beta = -0.103$ ,  $N = 1161$

**DLVGELGTALR pc2  
P04066**

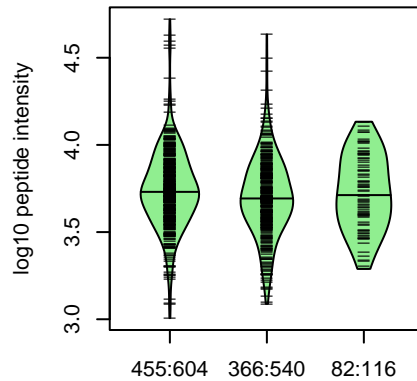

1:24180962:T:C\_C  
 $p = 0.21$ ,  $\beta = -0.0632$ ,  $N = 903$

**WEMCTSIDK pc2  
P04066**

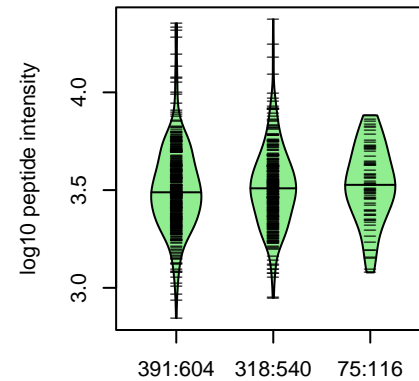

1:24180962:T:C\_C  
 $p = 0.27$ ,  $\beta = 0.0595$ ,  $N = 784$

**DGLIVPIFQER pc2  
P04066**

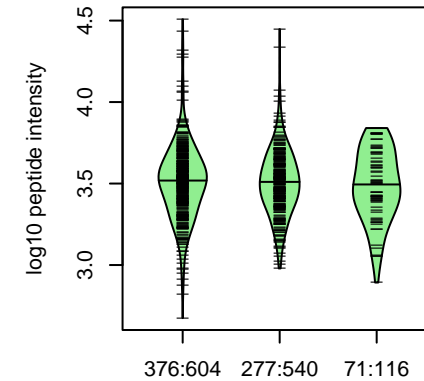

1:24180962:T:C\_C  
 $p = 0.83$ ,  $\beta = 0.0118$ ,  $N = 724$

**FUCA1 : NP5  
P04066**

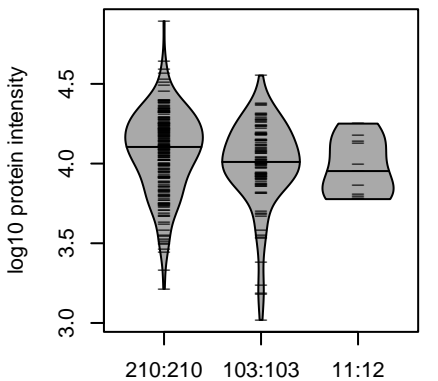

1:24180962:T:C\_C  
 $p = 0.033$ ,  $\beta = -0.211$ ,  $N = 324$

**DLVGELGTALR pc2  
P04066**

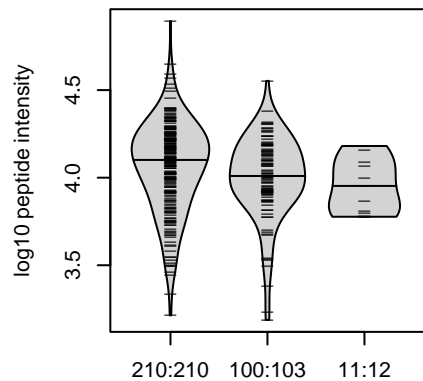

1:24180962:T:C\_C  
 $p = 0.051$ ,  $\beta = -0.195$ ,  $N = 321$

**FFHPEEWADLFQAAGAK pc3  
P04066**

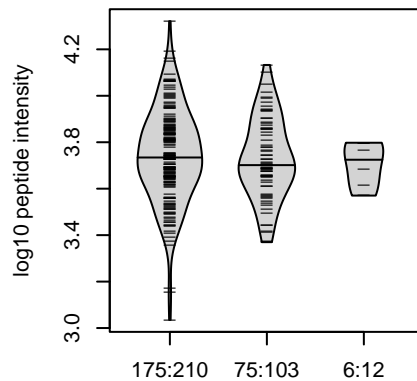

1:24180962:T:C\_C  
 $p = 0.65$ ,  $\beta = -0.0543$ ,  $N = 256$

**WEMCTSIDK pc2  
P04066**

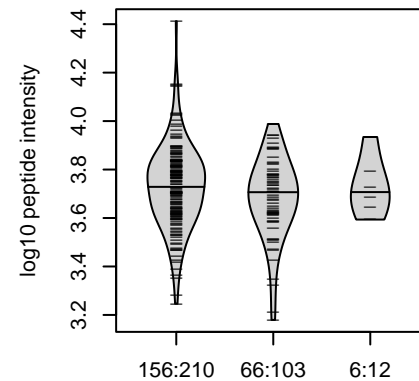

1:24180962:T:C\_C  
 $p = 0.19$ ,  $\beta = -0.162$ ,  $N = 228$

**YVVLTK pc2  
P04066**

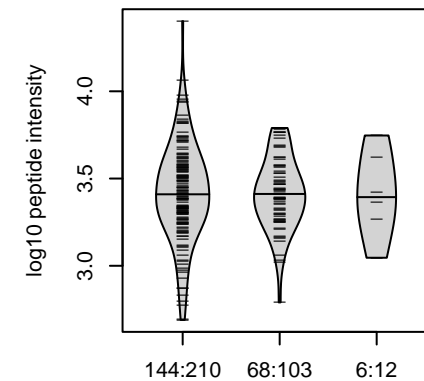

1:24180962:T:C\_C  
 $p = 0.96$ ,  $\beta = -0.0065$ ,  $N = 218$

Assay Target: FUCA1  
Olink UniProt: P04066  
UKB rsID: rs13551  
Proxy rsID: rs13551  
UKB SNP: 1:24180962:T:C  
Proxy SNP: 1:24180962:T:C  
UKB log10(p): 2197.8  
UKB BETA: -0.38  
-----  
1161:903:784:724:682:159:147:



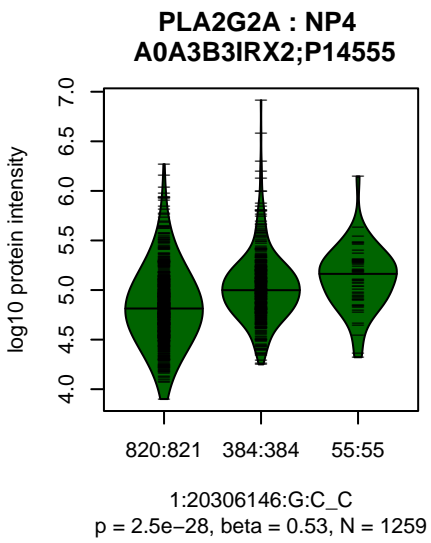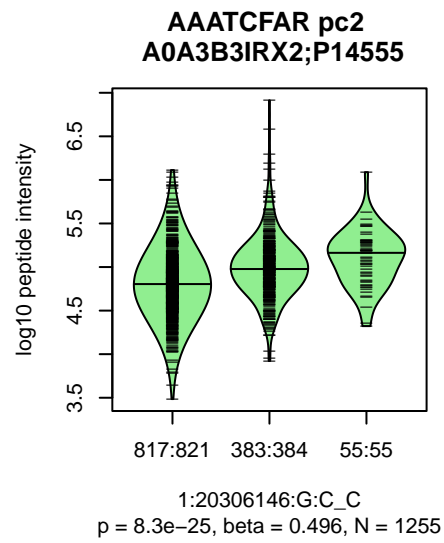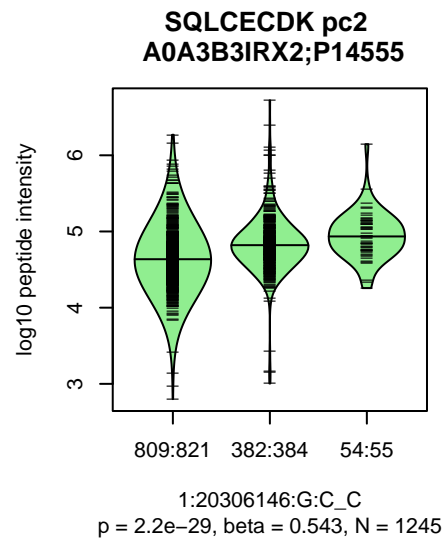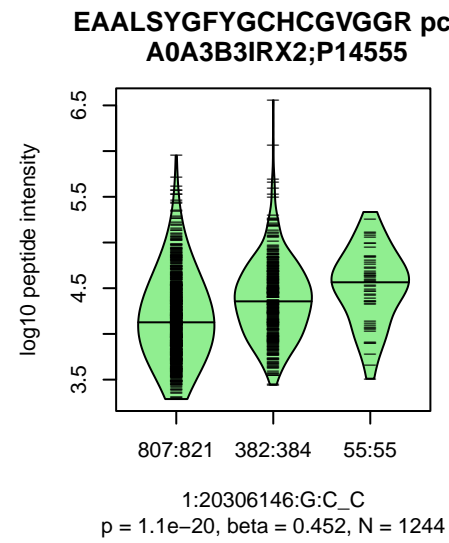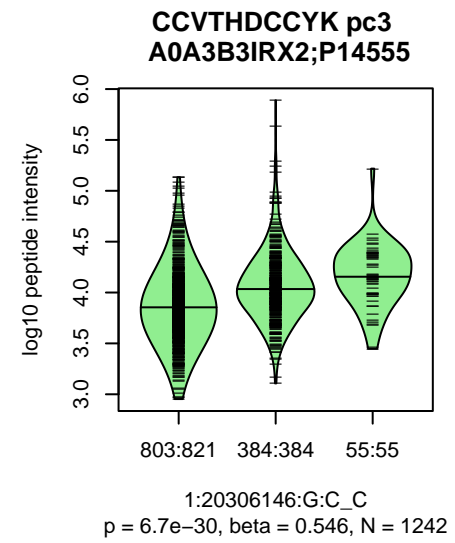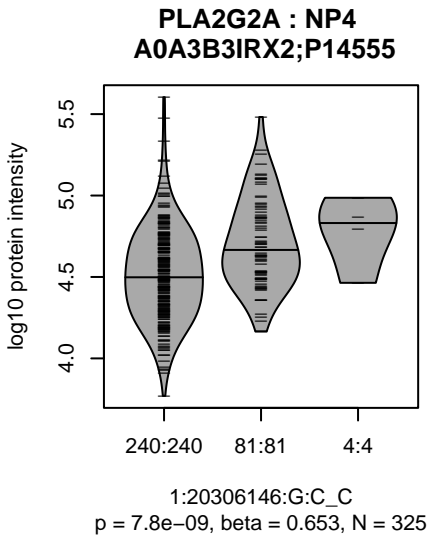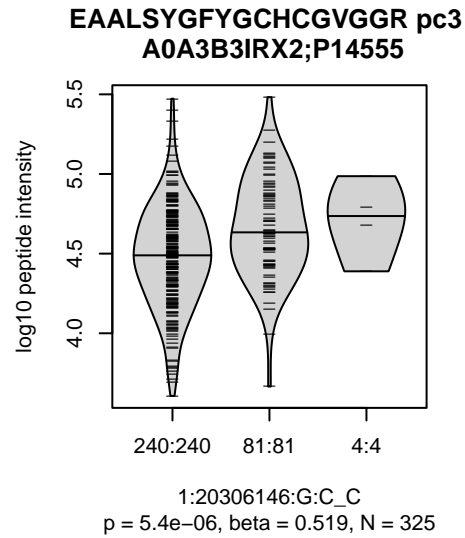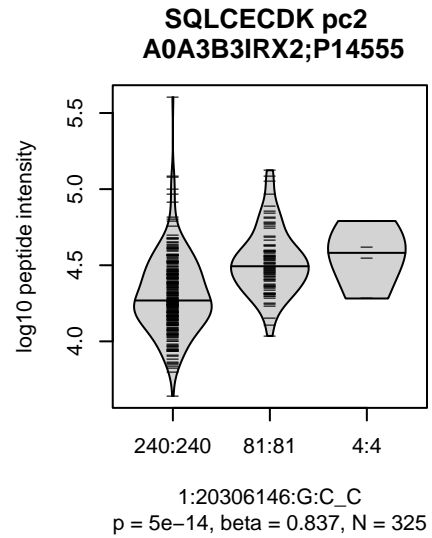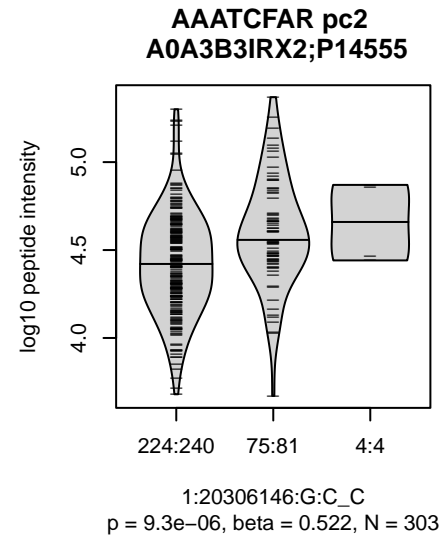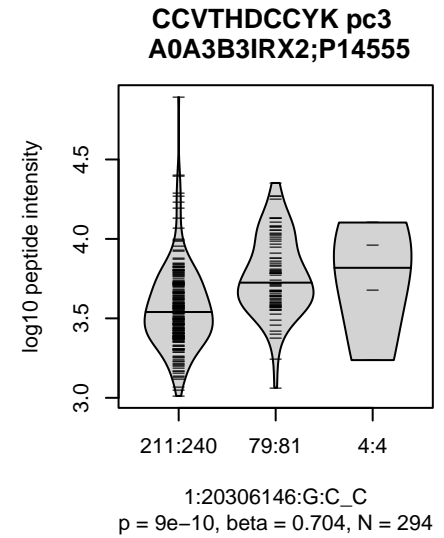

Assay Target: PLA2G2A  
 Olink UniProt: P14555  
 UKB rsID: rs11573156  
 Proxy rsID: rs11573156  
 UKB SNP: 1:20306146:G:C  
 Proxy SNP: 1:20306146:G:C  
 UKB log10(p): 2153.3  
 UKB BETA: 0.721  
 \*.\*.\*.\*.\*  
 1255:1245:1244:1242:1180:114

**MMP3 : NP5**  
**P08254**

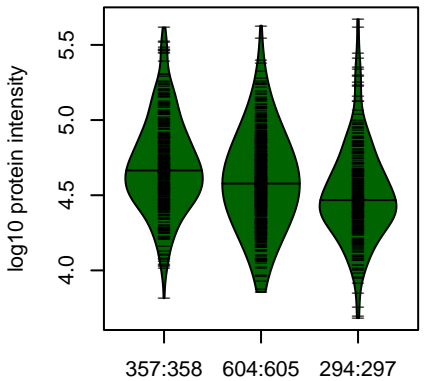

11:102714716:C:G\_C  
p = 2.3e-18, beta = -0.337, N = 1255

**VWEEVTLFSR pc2**  
**P08254;P09238**

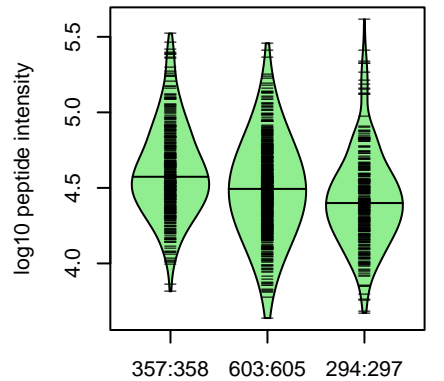

11:102714716:C:G\_C  
p = 6.4e-18, beta = -0.333, N = 1254

**IVNYTPDLPK pc2**  
**P08254**

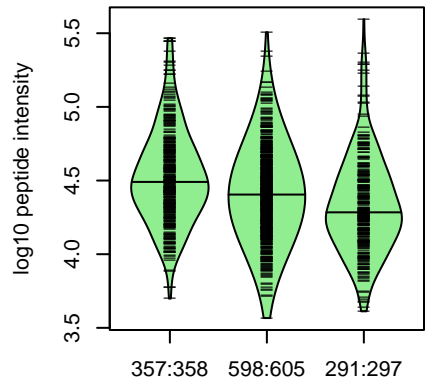

11:102714716:C:G\_C  
p = 1.1e-17, beta = -0.331, N = 1246

**LDSDTLEVMR pc2**  
**P08254**

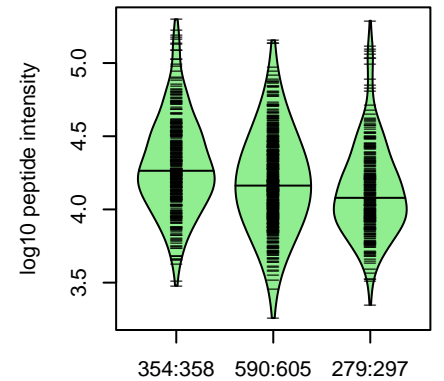

11:102714716:C:G\_C  
p = 3.5e-15, beta = -0.309, N = 1223

**GEDTSMNLVQK pc2**  
**P08254**

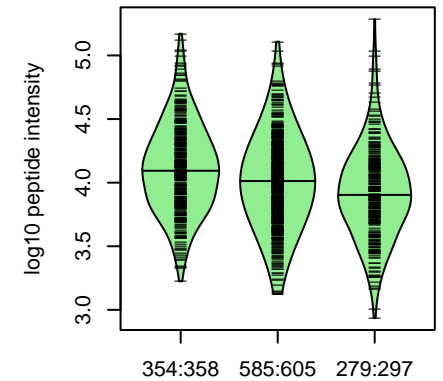

11:102714716:C:G\_C  
p = 7.6e-14, beta = -0.294, N = 1218

**MMP3 : NP5**  
**P08254**

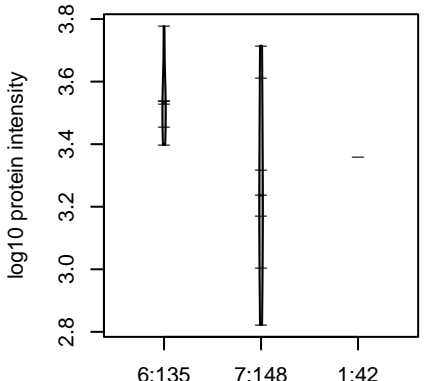

11:102714716:C:G\_C  
p = 0.21, beta = -0.486, N = 14

**YLENYDLEK pc2**  
**rs679620 ALT**

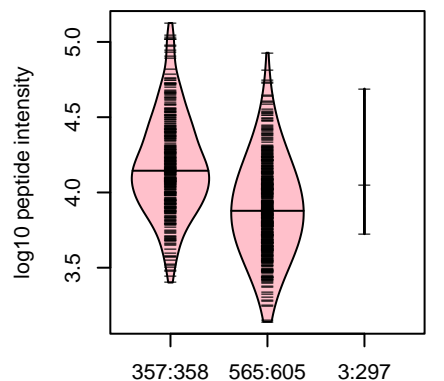

11:102714716:C:G\_C  
p = 5.8e-237, model = DOM, N = 925

**YLENYDLK pc2**  
**rs679620 REF**

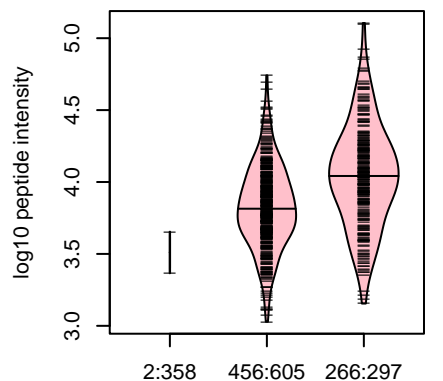

11:102714716:C:G\_C  
p = 3.7e-173, model = REC, N = 724

**YLENYDLKK pc3**  
**rs679620 REF**

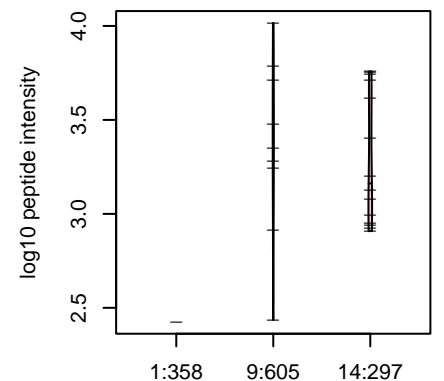

11:102714716:C:G\_C  
p = 0.00023, model = DOM, N = 24

Assay Target: MMP3  
Olink UniProt: P08254  
UKB rsID: rs617819  
Proxy rsID: rs617819  
UKB SNP: 11:102714716:C:G  
Proxy SNP: 11:102714716:C:G  
UKB log10(p): 2089.3  
UKB BETA: 0.475  
\*\*\*\*\*  
1254:1246:1223:1218:1209:118

**GNLY : NP4**  
**B4E3H9;P22749;P22749-2**

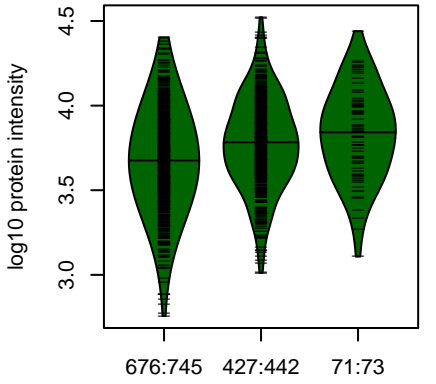

2:85935182:A:G\_G  
 $p = 3.4e-08$ ,  $\beta = 0.262$ ,  $N = 1174$

**TCLTIVQK pc2**  
**B4E3H9;P22749;P22749-2**

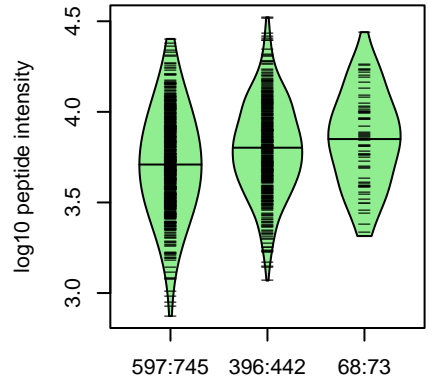

2:85935182:A:G\_G  
 $p = 1.6e-05$ ,  $\beta = 0.214$ ,  $N = 1061$

**MVDKPTQR pc2**  
**B4E3H9;P22749;P22749-2**

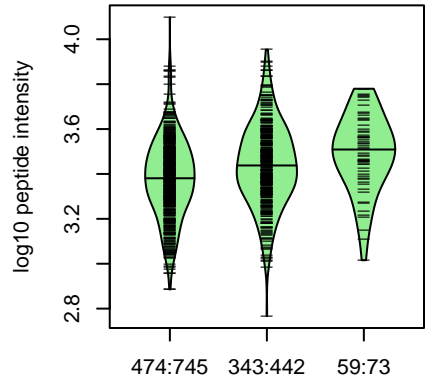

2:85935182:A:G\_G  
 $p = 1.3e-07$ ,  $\beta = 0.284$ ,  $N = 876$

**SCPCLAQEGPQGDLLTK pc2**  
**B4E3H9;P22749;P22749-2**

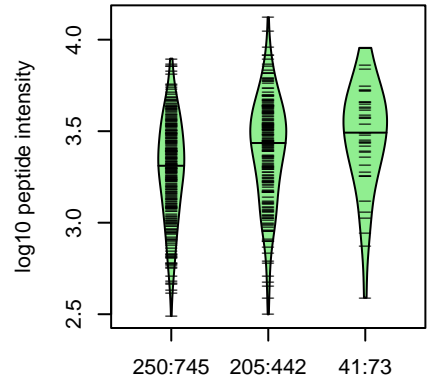

2:85935182:A:G\_G  
 $p = 8.3e-05$ ,  $\beta = 0.272$ ,  $N = 496$

**GNLY : NP4**  
**B4E3H9;P22749;P22749-2**

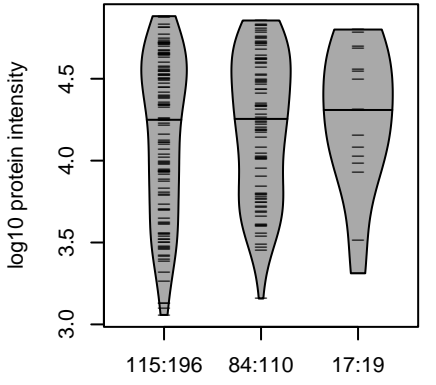

2:85935182:A:G\_G  
 $p = 0.23$ ,  $\beta = 0.126$ ,  $N = 216$

**TCLTIVQK pc2**  
**B4E3H9;P22749;P22749-2**

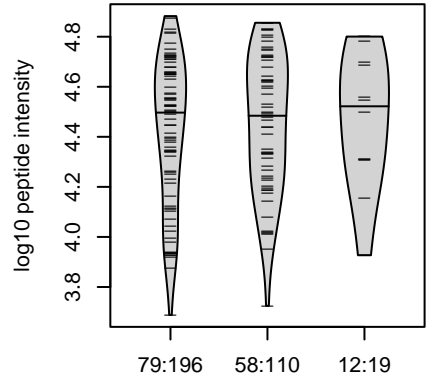

2:85935182:A:G\_G  
 $p = 0.42$ ,  $\beta = 0.102$ ,  $N = 149$

**SCPCLAQEGPQGDLLTK pc2**  
**B4E3H9;P22749;P22749-2**

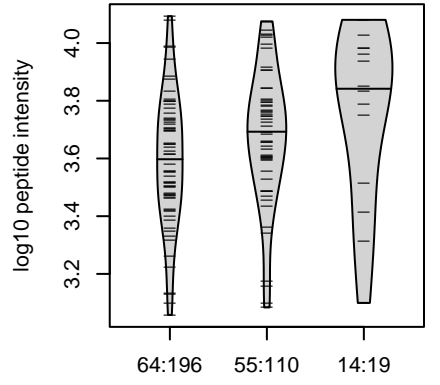

2:85935182:A:G\_G  
 $p = 0.041$ ,  $\beta = 0.258$ ,  $N = 133$

**VIQGLVAGETAQQICEDLR pc3**  
**rs11127 ALT**

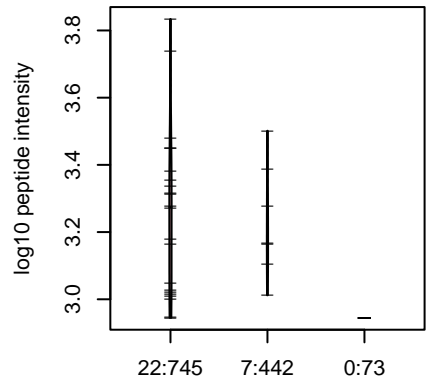

2:85935182:A:G\_G  
 $p = 0.084$ ,  $\text{model} = \text{REC}$ ,  $N = 29$

Assay Target: GNLY  
 Olink UniProt: P22749  
 UKB rsID: rs7603438  
 Proxy rsID: rs7603438  
 UKB SNP: 2:85935182:A:G  
 Proxy SNP: 2:85935182:A:G  
 UKB log10(p): 2087  
 UKB BETA: 0.702  
 \*\*\*  
 1061:876:496



**OGN : NP2  
P20774**

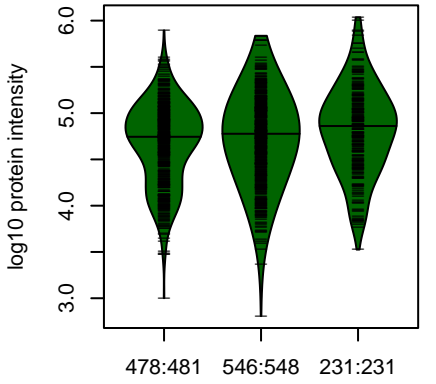

9:95053871:G:T\_T  
p = 0.00038, beta = 0.137, N = 1255

**DFADIPNLR pc2  
P20774**

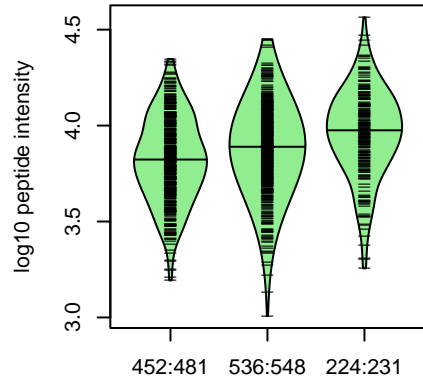

9:95053871:G:T\_T  
p = 1.1e-12, beta = 0.279, N = 1212

**ETVIIPNEK pc2  
P20774**

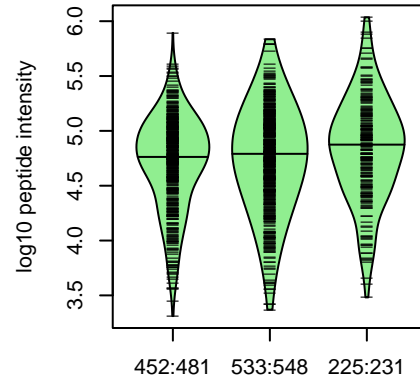

9:95053871:G:T\_T  
p = 0.0066, beta = 0.107, N = 1210

**LSLLEELSLAENQLLK pc2  
P20774**

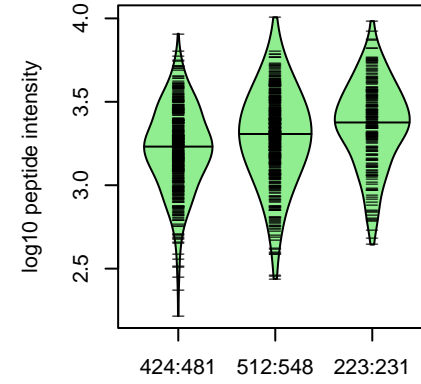

9:95053871:G:T\_T  
p = 5.3e-11, beta = 0.262, N = 1159

**LEGNPIVLGK pc2  
P20774**

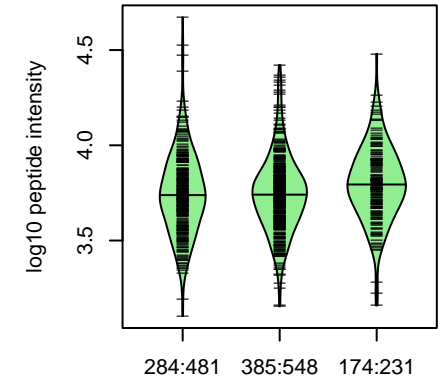

9:95053871:G:T\_T  
p = 0.0075, beta = 0.126, N = 843

**OGN : NP2  
P20774**

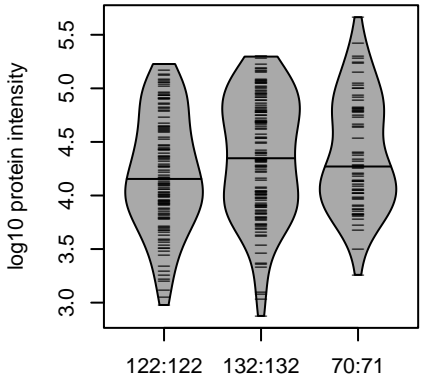

9:95053871:G:T\_T  
p = 0.22, beta = 0.0886, N = 324

**LSLLEELSLAENQLLK pc2  
P20774**

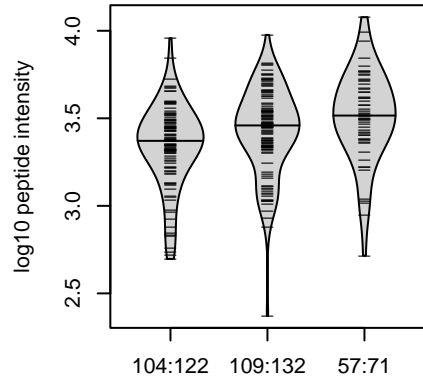

9:95053871:G:T\_T  
p = 0.0022, beta = 0.242, N = 270

**ETVIIPNEK pc2  
P20774**

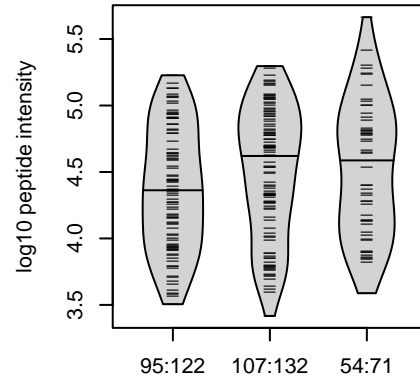

9:95053871:G:T\_T  
p = 0.18, beta = 0.111, N = 256

**LEGNPIVLGK pc2  
P20774**

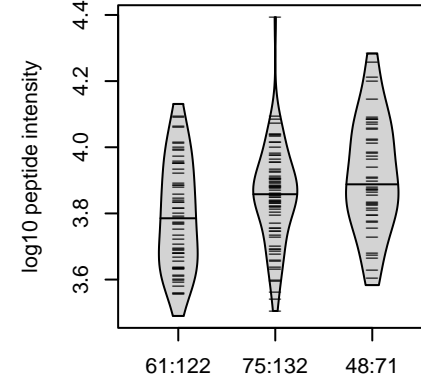

9:95053871:G:T\_T  
p = 0.0057, beta = 0.259, N = 184

**DFADIPNLR pc2  
P20774**

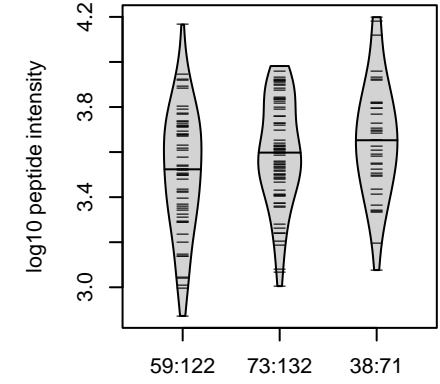

9:95053871:G:T\_T  
p = 0.26, beta = 0.113, N = 170

Assay Target: OGN  
Olink UniProt: P20774  
UKB rsID: rs6479416  
Proxy rsID: rs6479416  
UKB SNP: 9:95053871:G:T  
Proxy SNP: 9:95053871:G:T  
UKB log10(p): 2084.4  
UKB BETA: 0.579  
\*.\*.\*.\*-:-:-:-:-  
1212:1210:1159:843:383:235:22

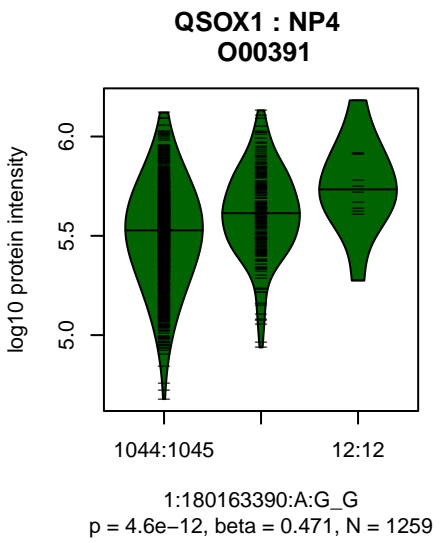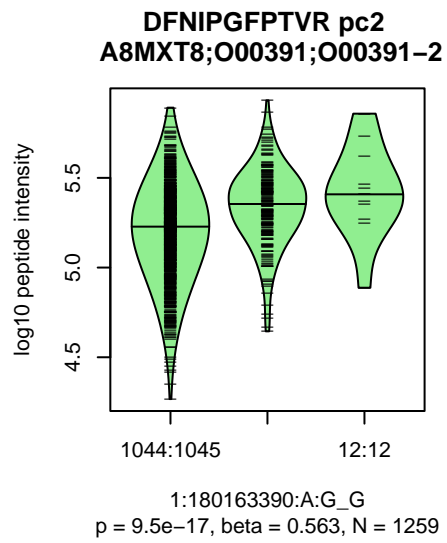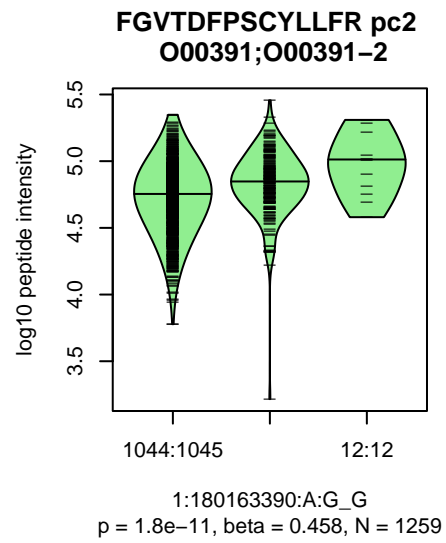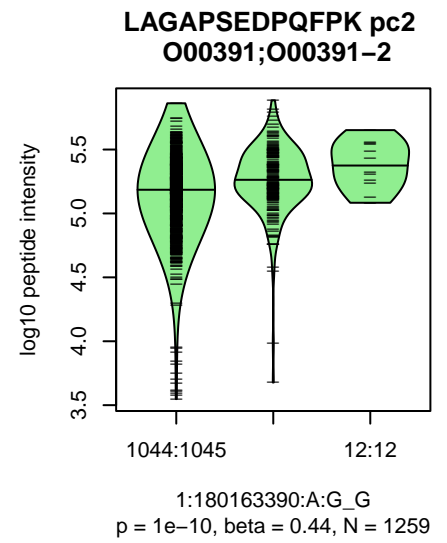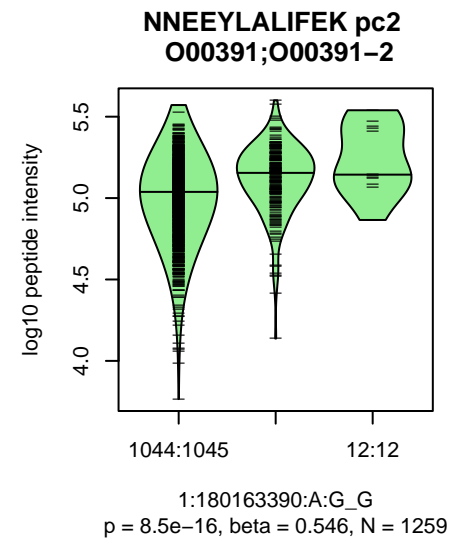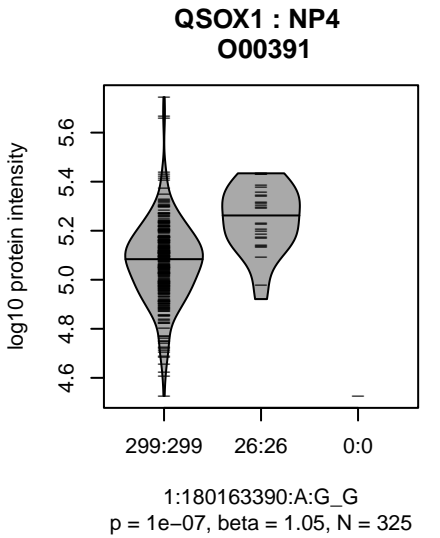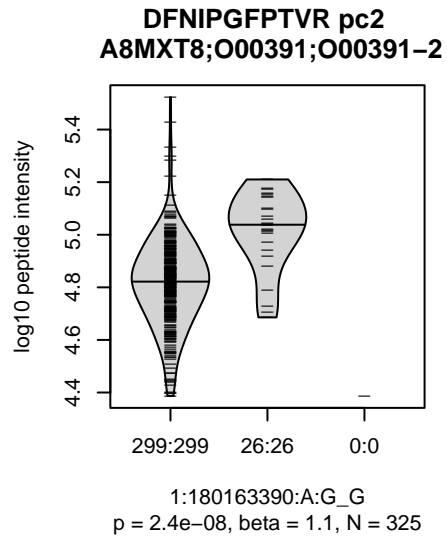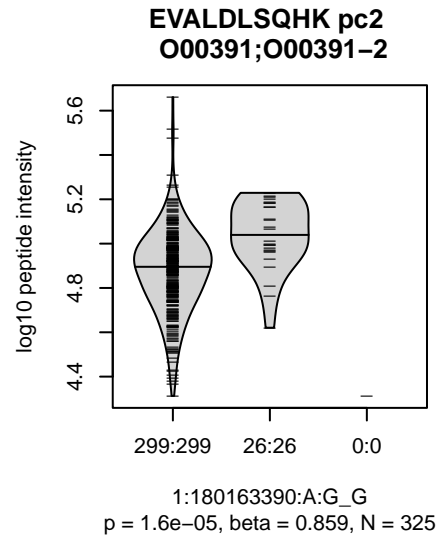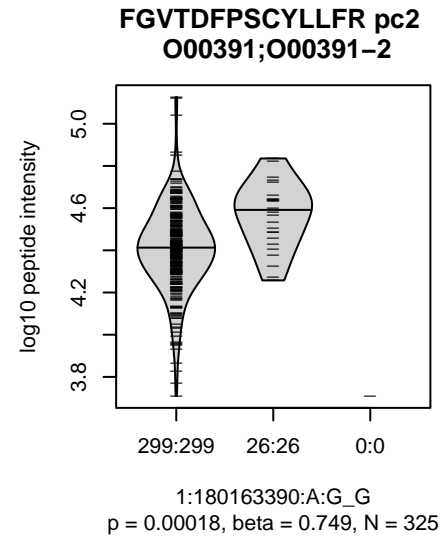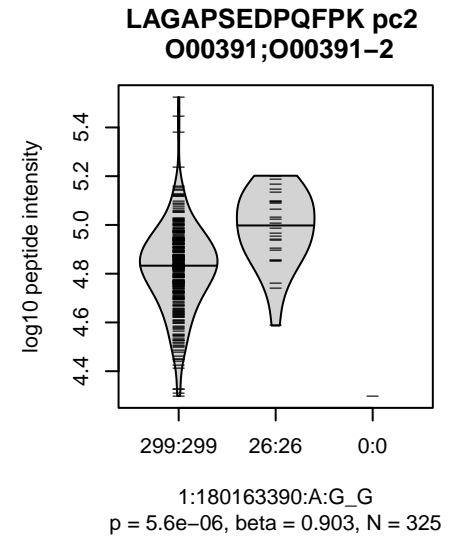

**GGSYLGREVALDLSQHK pc3  
rs17855475 REF**

Assay Target: QSOX1  
Olink UniProt: O00391  
UKB rsID: rs12371  
Proxy rsID: rs12371  
UKB SNP: 1:180163390:A:G  
Proxy SNP: 1:180163390:A:G  
UKB log10(p): 2067  
UKB BETA: -1.076  
\*\*\*\*\*  
1259:1259:1259:1259:1258:125

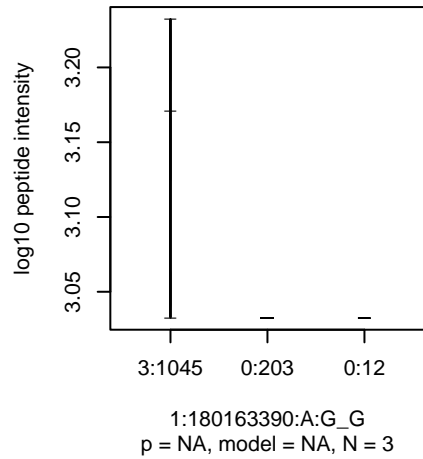

**CHGB : NP2  
P05060**

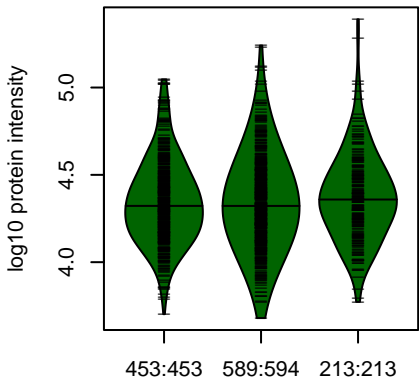

20:5903894:A:G\_G  
p = 0.36, beta = 0.0365, N = 1255

**CIIEVLSNALSK pc2  
P05060**

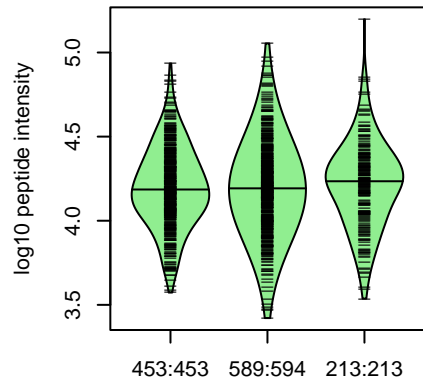

20:5903894:A:G\_G  
p = 0.52, beta = 0.026, N = 1255

**SSAPPITPECR pc2  
P05060**

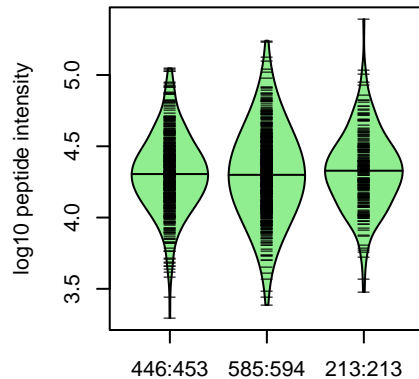

20:5903894:A:G\_G  
p = 0.69, beta = 0.016, N = 1244

**SSQGGSLPSEEK pc2  
P05060**

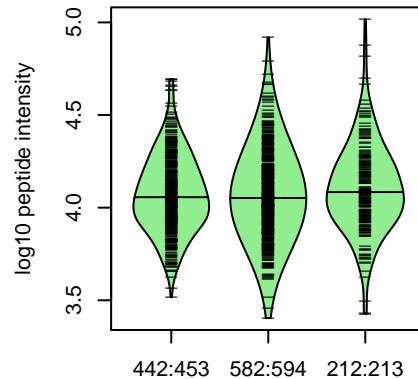

20:5903894:A:G\_G  
p = 0.23, beta = 0.0483, N = 1236

**ELENLAAMDLELQK pc2  
P05060**

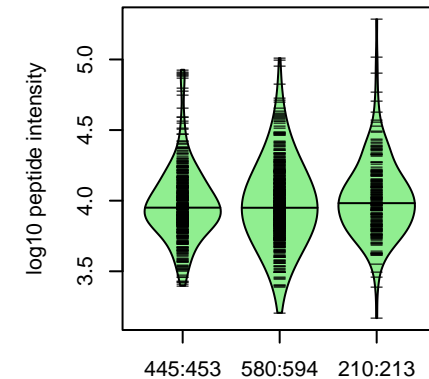

20:5903894:A:G\_G  
p = 0.26, beta = 0.0452, N = 1235

**CHGB : NP2  
P05060**

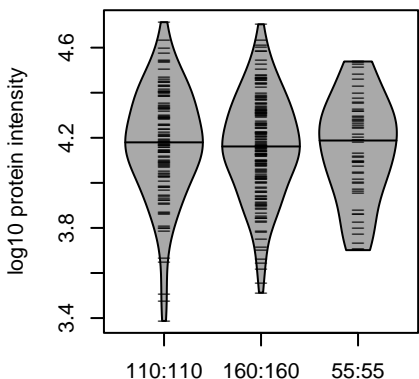

20:5903894:A:G\_G  
p = 0.36, beta = -0.0725, N = 325

**CIIEVLSNALSK pc2  
P05060**

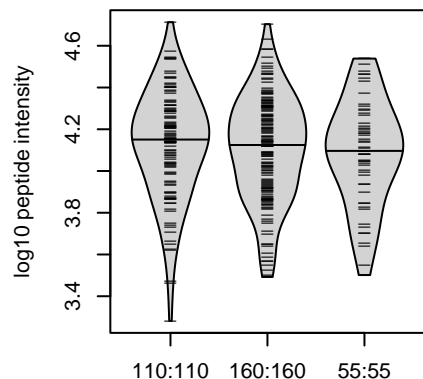

20:5903894:A:G\_G  
p = 0.27, beta = -0.088, N = 325

**SSQGGSLPSEEK pc2  
P05060**

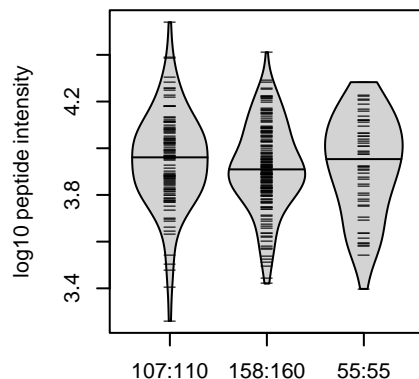

20:5903894:A:G\_G  
p = 0.3, beta = -0.0825, N = 320

**SSAPPITPECR pc2  
P05060**

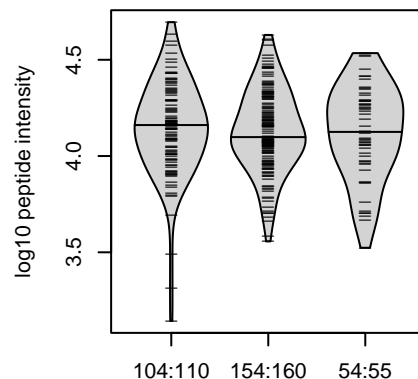

20:5903894:A:G\_G  
p = 0.37, beta = -0.0724, N = 312

**DRADQTVLTEDEK pc3  
P05060**

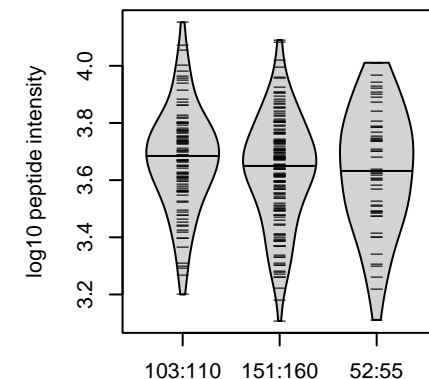

20:5903894:A:G\_G  
p = 0.14, beta = -0.119, N = 306

**GYPGVQAPEDLEWER pc2  
rs236152 REF**

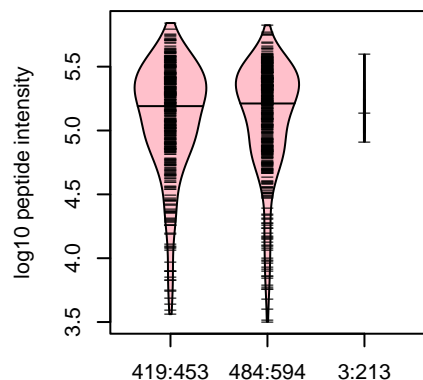

20:5903894:A:G\_G  
p = 3.1e-137, model = DOM, N = 906

**LLRDPADATEAHSSSR pc4  
rs6085324 ALT**

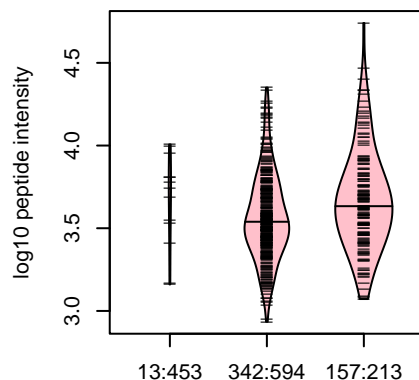

20:5903894:A:G\_G  
p = 1.6e-112, model = REC, N = 512

**LLRDPADATEAHSSSR pc3  
rs6085324 ALT**

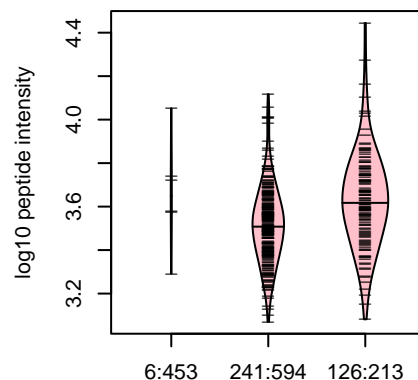

20:5903894:A:G\_G  
p = 1.9e-78, model = REC, N = 373

**DPADATEAHSSSR pc2  
rs6085324 ALT**

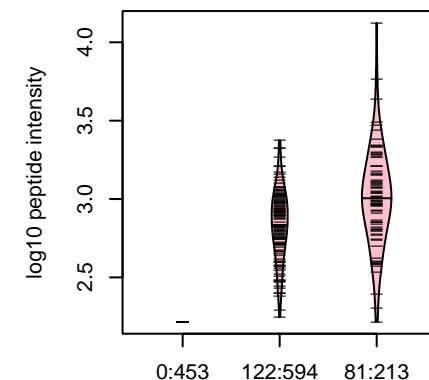

20:5903894:A:G\_G  
p = 2.4e-44, model = REC, N = 203

Assay Target: CHGB  
Olink UniProt: P05060  
UKB rsID: rs236153  
Proxy rsID: rs236153  
UKB SNP: 20:5903894:A:G  
Proxy SNP: 20:5903894:A:G  
UKB log10(p): 2052  
UKB BETA: -0.597  
-----  
1255:1244:1236:1235:1160:114

**TIMP3 : NP4**  
**P35625**

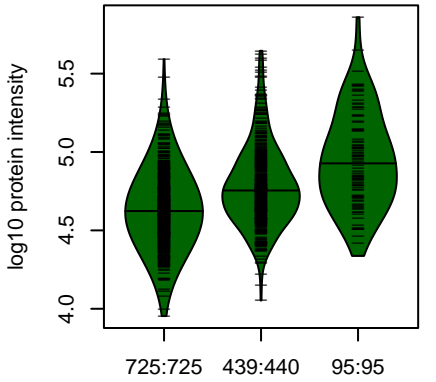

22:33161150:A:G\_A  
 $p = 3.6e-38$ ,  $\beta = 0.554$ ,  $N = 1259$

**SCYYLPCFVTSK pc2**  
**P35625**

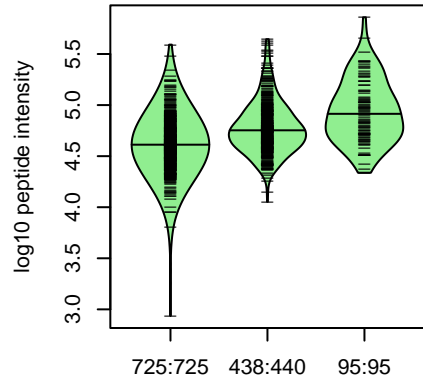

22:33161150:A:G\_A  
 $p = 7.7e-40$ ,  $\beta = 0.566$ ,  $N = 1258$

**EGPFGTLVYTIK pc2**  
**P35625**

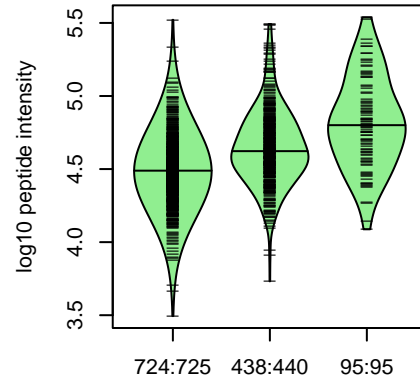

22:33161150:A:G\_A  
 $p = 3.1e-39$ ,  $\beta = 0.562$ ,  $N = 1257$

**MPHVQYIHTEASESLCGLK pc4**  
**P35625**

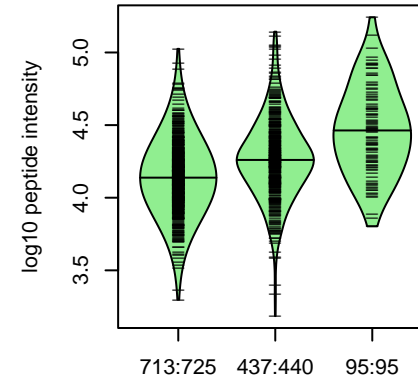

22:33161150:A:G\_A  
 $p = 6.3e-30$ ,  $\beta = 0.493$ ,  $N = 1245$

**YQYLLTGR pc2**  
**P35625**

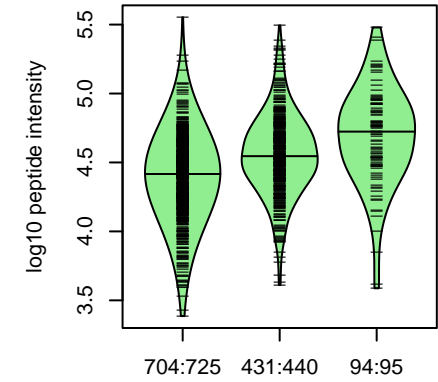

22:33161150:A:G\_A  
 $p = 1.1e-26$ ,  $\beta = 0.468$ ,  $N = 1229$

**TIMP3 : NP4**  
**P35625**

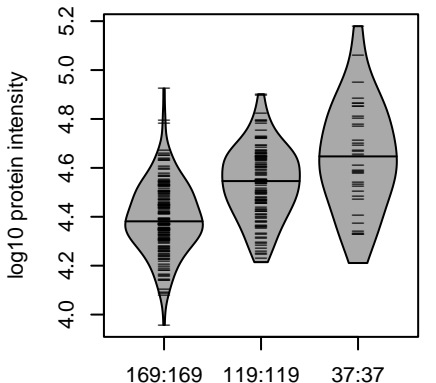

22:33161150:A:G\_A  
 $p = 1.4e-15$ ,  $\beta = 0.609$ ,  $N = 325$

**SCYYLPCFVTSK pc2**  
**P35625**

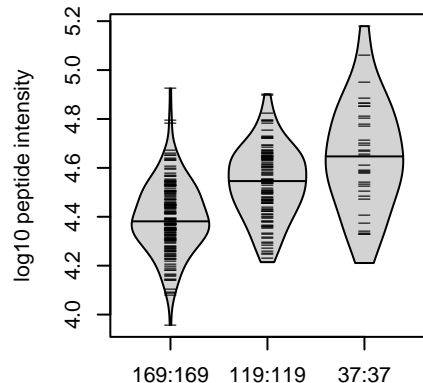

22:33161150:A:G\_A  
 $p = 1.4e-15$ ,  $\beta = 0.609$ ,  $N = 325$

**YHLGCNCK pc2**  
**P35625**

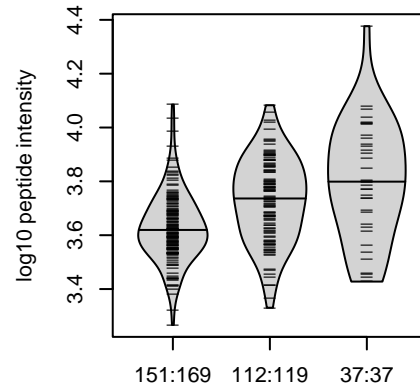

22:33161150:A:G\_A  
 $p = 2.9e-08$ ,  $\beta = 0.444$ ,  $N = 300$

**MPHVQYIHTEASESLCGLK pc4**  
**P35625**

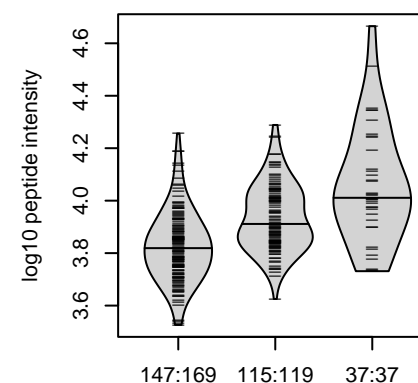

22:33161150:A:G\_A  
 $p = 1.8e-14$ ,  $\beta = 0.602$ ,  $N = 299$

**EGPFGTLVYTIK pc2**  
**P35625**

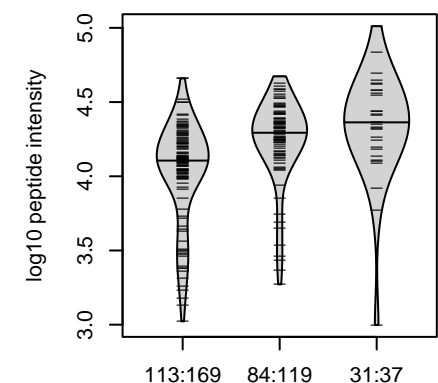

22:33161150:A:G\_A  
 $p = 2.2e-07$ ,  $\beta = 0.463$ ,  $N = 228$

Assay Target: TIMP3  
Olink UniProt: P35625  
UKB rsID: rs11404116  
Proxy rsID: rs929015  
UKB SNP: 22:33164633:A:AT  
Proxy SNP: 22:33161150:A:G  
UKB log10(p): 1997.5  
UKB BETA: -0.652  
\*\*\*\*\*  
1258:1257:1245:1229:1218:121





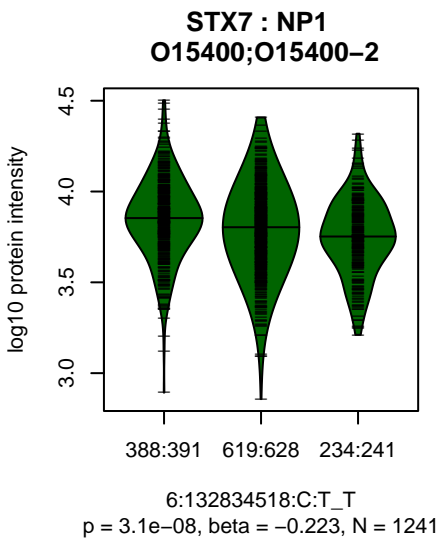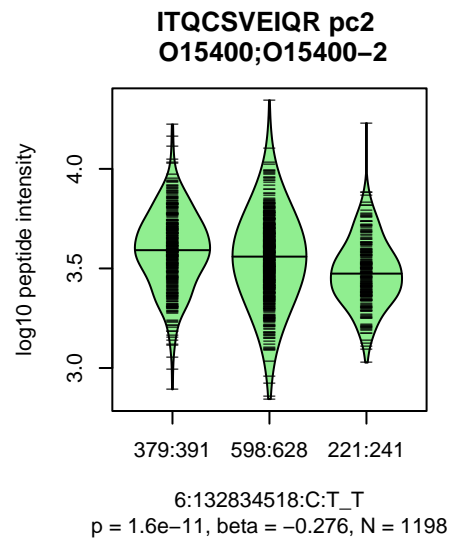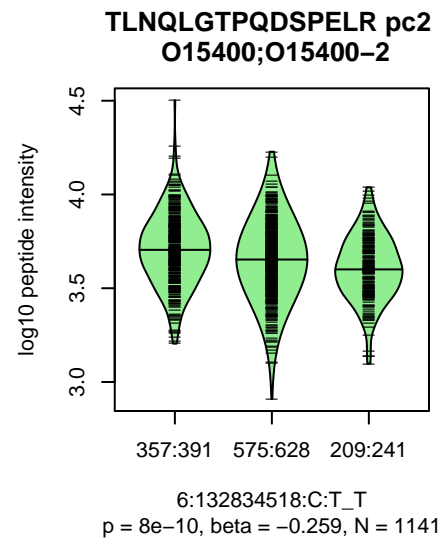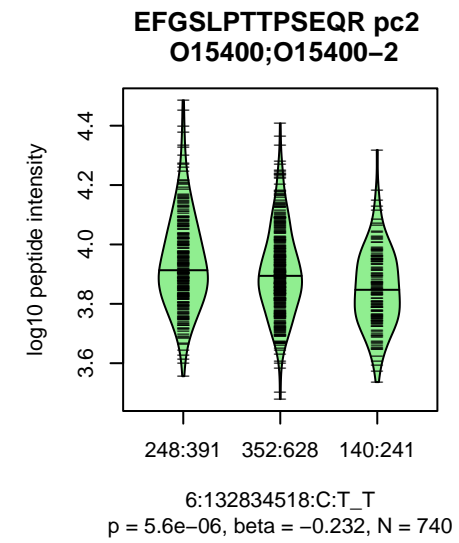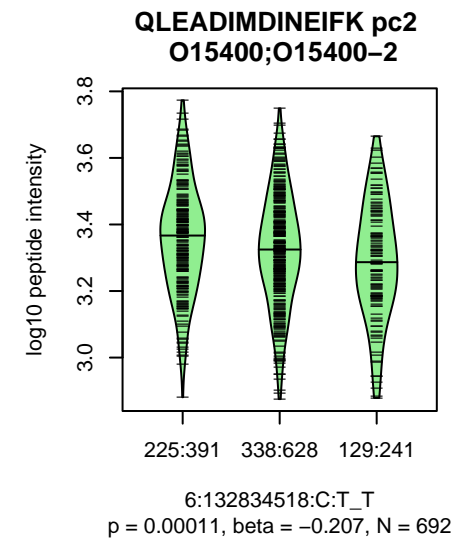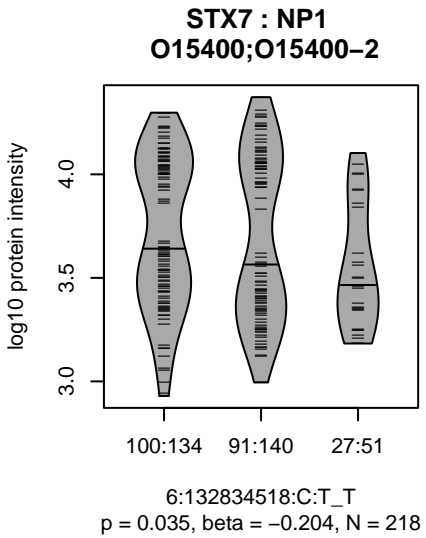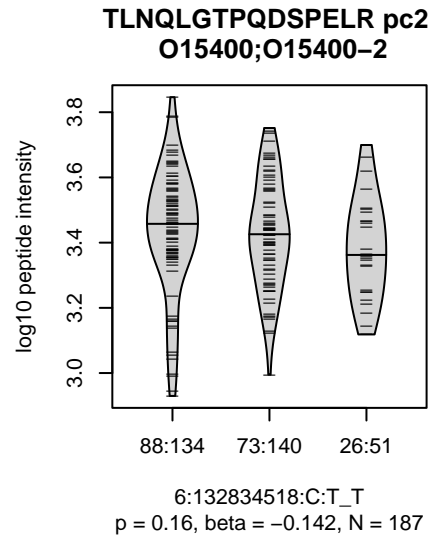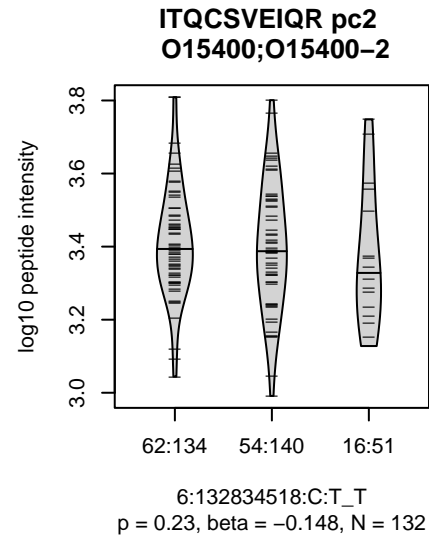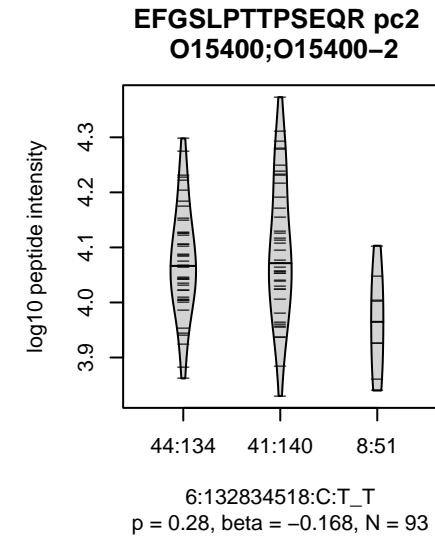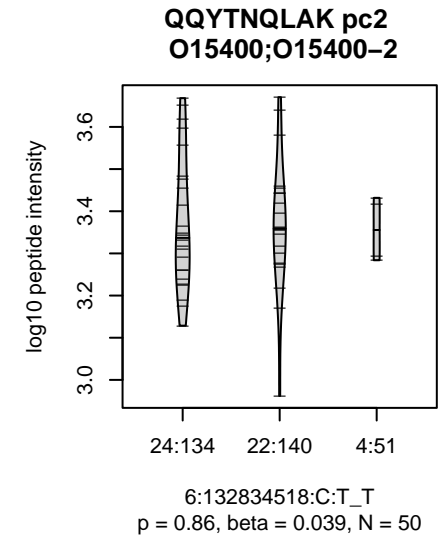

Assay Target: STX7  
 Olink UniProt: O15400  
 UKB rsID: rs3813356  
 Proxy rsID: rs3813356  
 UKB SNP: 6:132834518:C:T  
 Proxy SNP: 6:132834518:C:T  
 UKB log10(p): 1960.4  
 UKB BETA: -0.582  
 \*\*.\*.\*.\*.\*\_\*.\*.\*  
 1198:1141:740:692:667:431:427

**ATRN : NP2**  
**O75882**

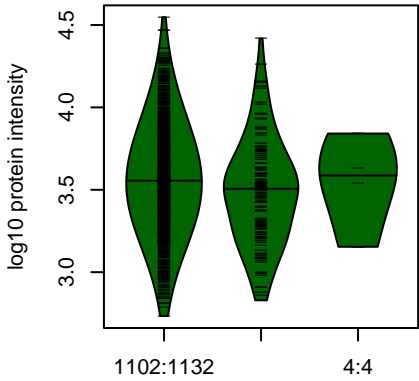

20:3530612:A:G\_G  
p = 0.021, beta = -0.208, N = 1225

**SEAACLAAGPGIR pc2**  
**O75882;O75882-2**

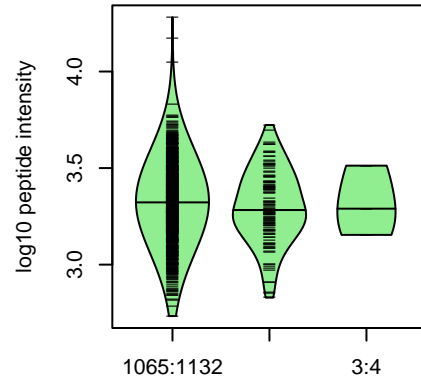

20:3530612:A:G\_G  
p = 0.21, beta = -0.116, N = 1185

**EQYAVVGHSAHIVTLK pc3**  
**O75882;O75882-2**

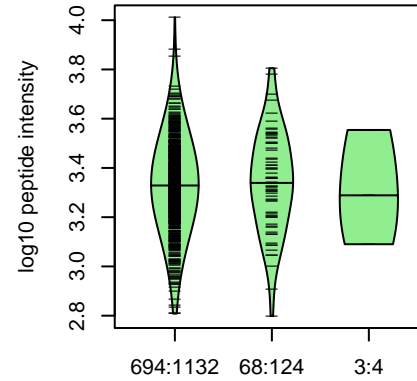

20:3530612:A:G\_G  
p = 0.62, beta = 0.0574, N = 765

**GDECQLCEVENR pc2**  
**O75882;O75882-2**

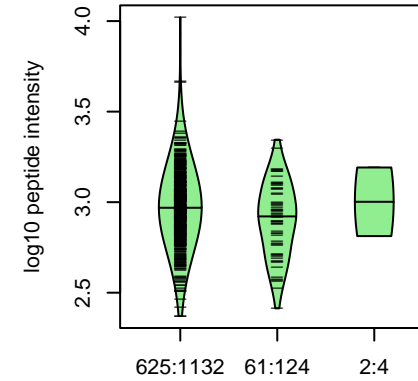

20:3530612:A:G\_G  
p = 0.018, beta = -0.295, N = 688

**CTWLIEGQPNR pc2**  
**O75882;O75882-2**

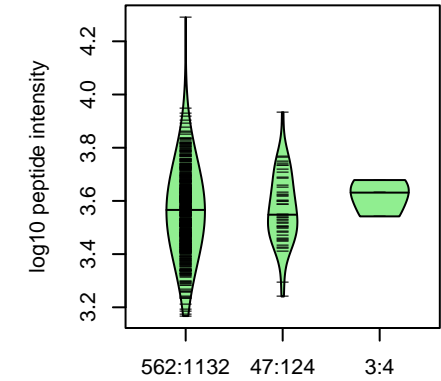

20:3530612:A:G\_G  
p = 0.47, beta = 0.098, N = 612

**ATRN : NP2**  
**O75882;O75882-2**

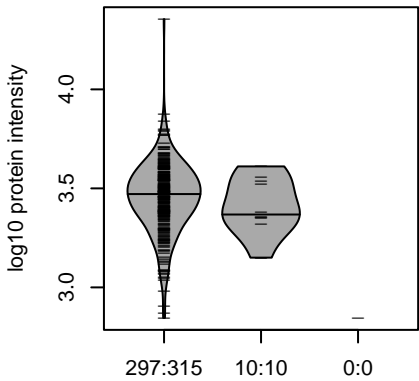

20:3530612:A:G\_G  
p = 0.41, beta = -0.263, N = 307

**SEAACLAAGPGIR pc2**  
**O75882;O75882-2**

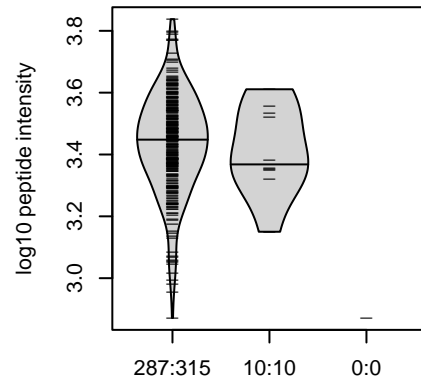

20:3530612:A:G\_G  
p = 0.54, beta = -0.192, N = 297

**GDECQLCEVENR pc2**  
**O75882;O75882-2**

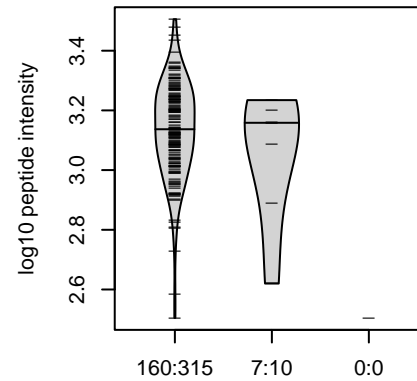

20:3530612:A:G\_G  
p = 0.17, beta = -0.523, N = 167

**EQYAVVGHSAHIVTLK pc3**  
**O75882;O75882-2**

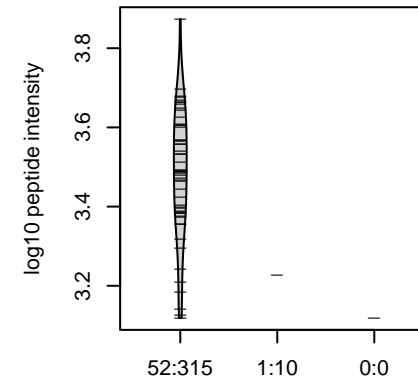

20:3530612:A:G\_G  
p = 0.42, beta = -0.779, N = 53

**CTWLIEGQPNR pc2**  
**O75882;O75882-2**

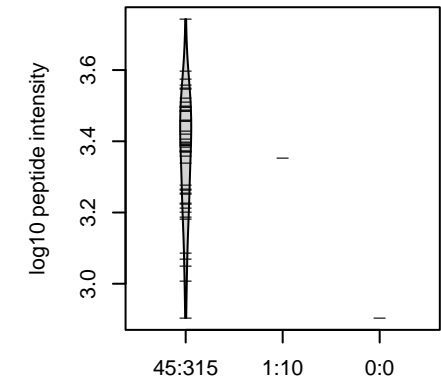

20:3530612:A:G\_G  
p = 0.89, beta = -0.137, N = 46

Assay Target: ATRN  
Olink UniProt: O75882  
UKB rsID: rs180821996  
Proxy rsID: rs76443601  
UKB SNP: 20:3535672:C:T  
Proxy SNP: 20:3530612:A:G  
UKB log10(p): 1939.9  
UKB BETA: -1.295  
-----  
1185:765:688:612:432:180

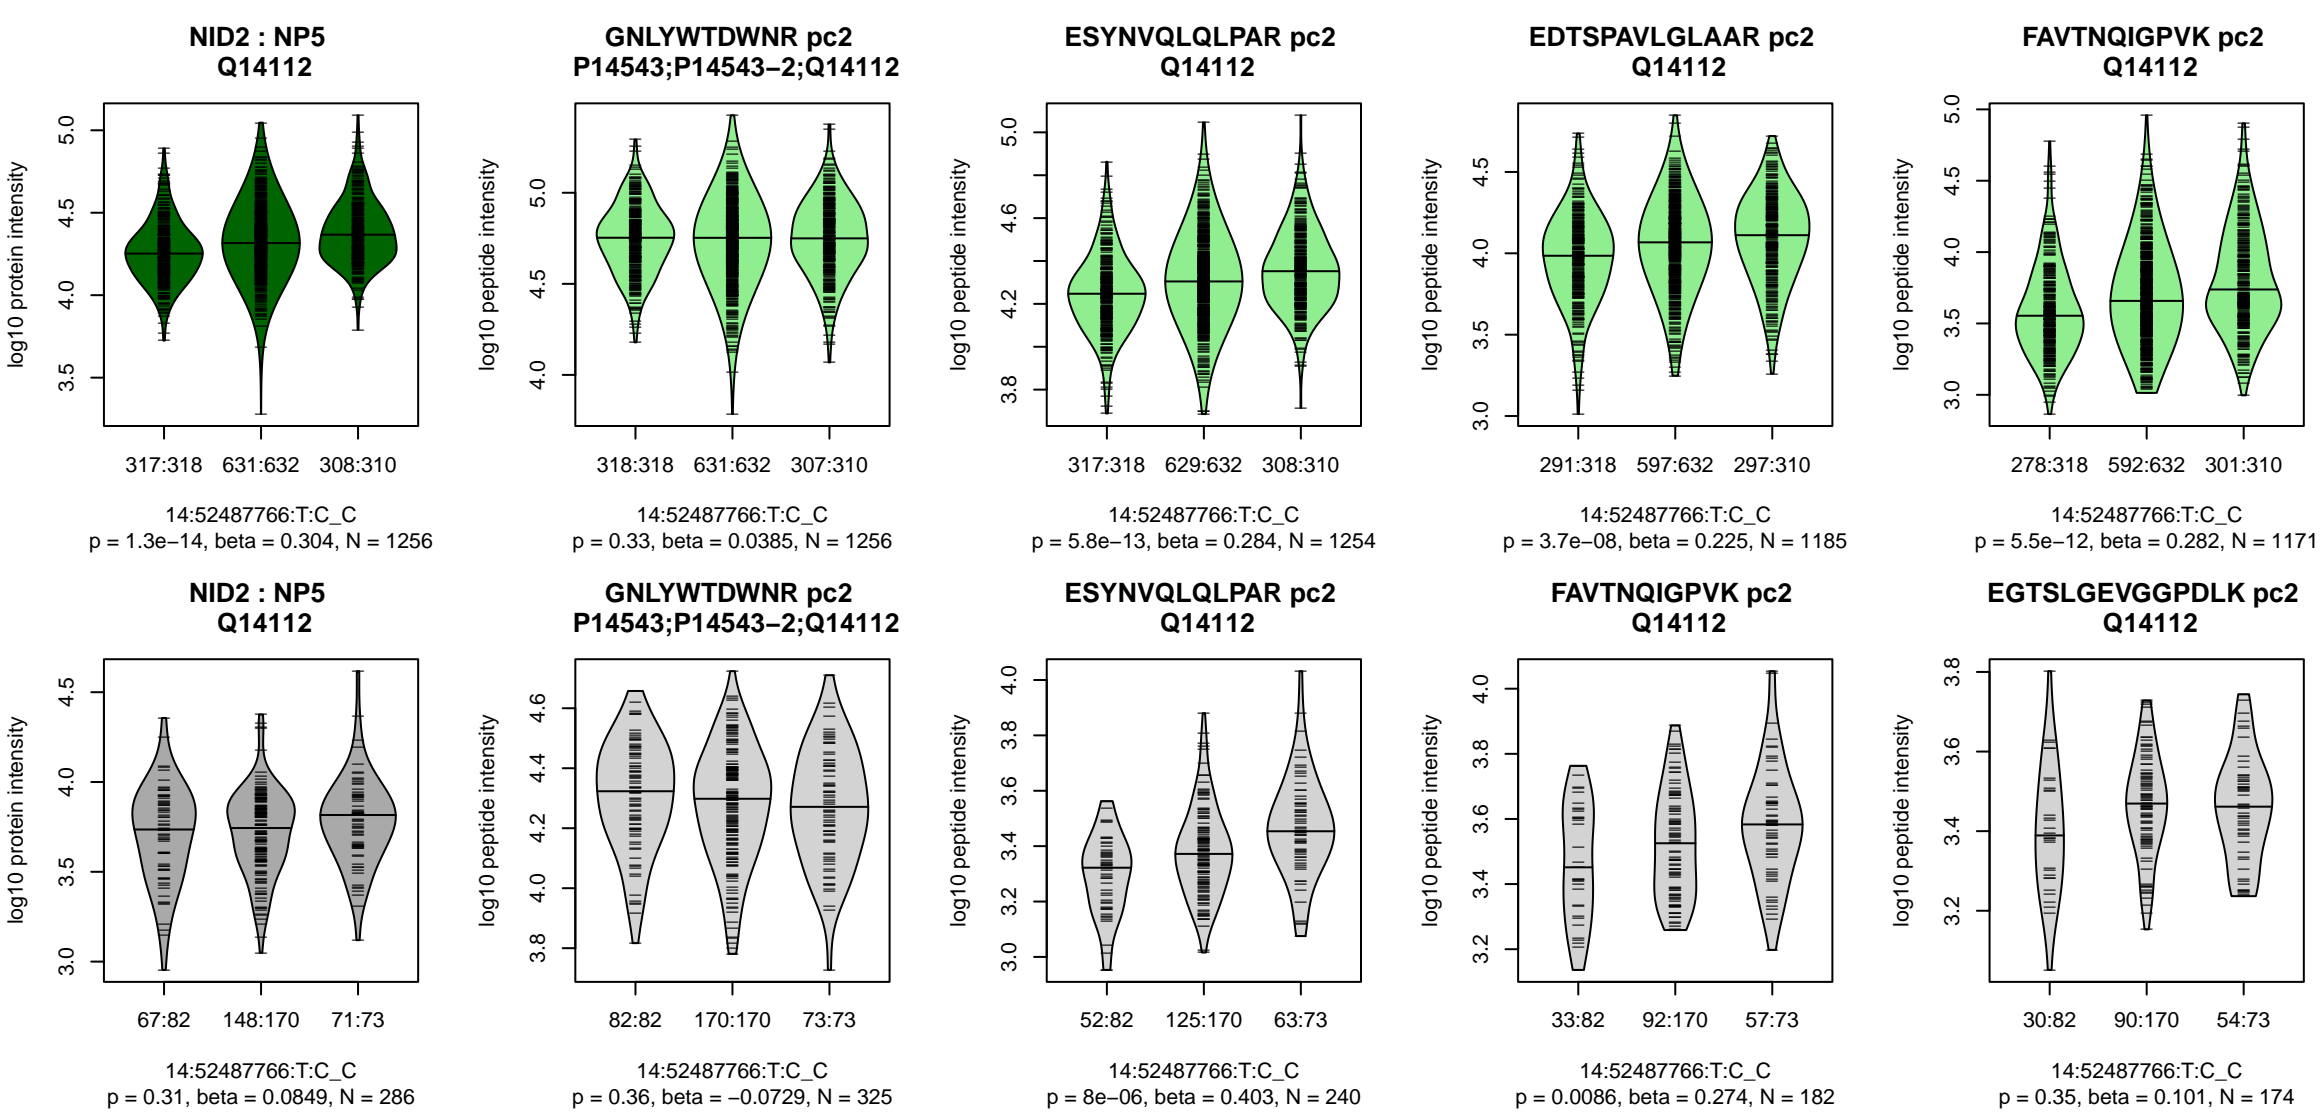

Assay Target: NID2  
 Olink UniProt: Q14112  
 UKB rsID: rs2516600  
 Proxy rsID: rs2516600  
 UKB SNP: 14:52487766:T:C  
 Proxy SNP: 14:52487766:T:C  
 UKB log<sub>10</sub>(p): 1914.1  
 UKB BETA: 0.574  
 -----  
 1256:1254:1185:1171:1164:107





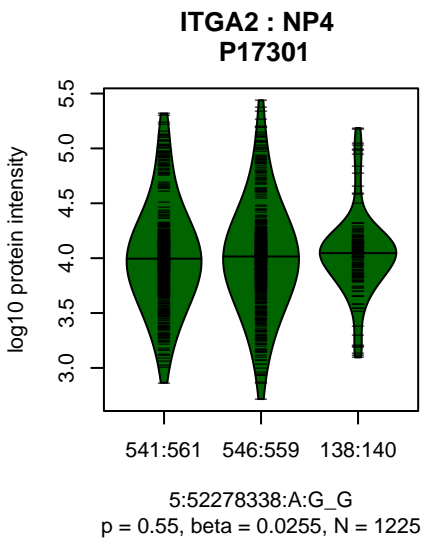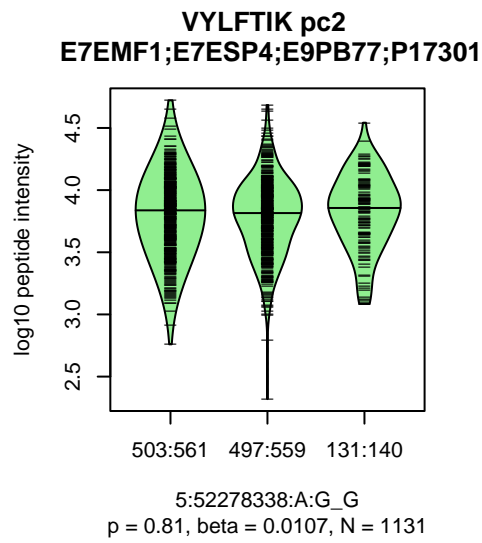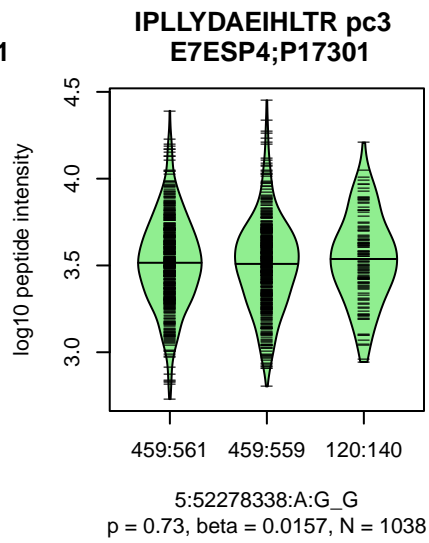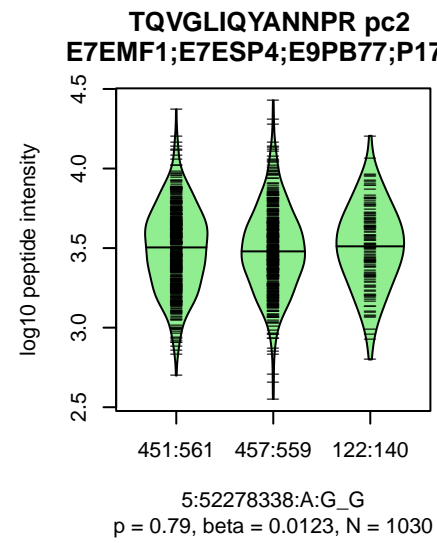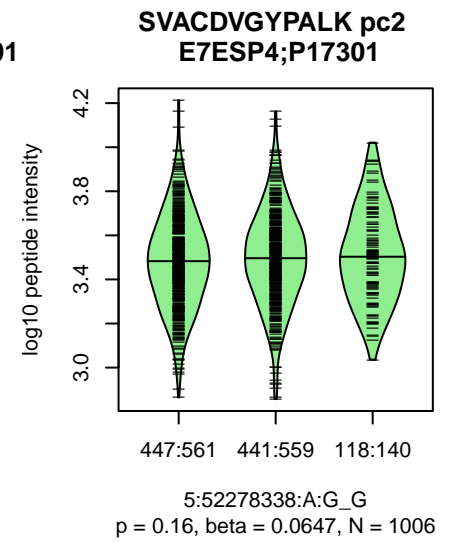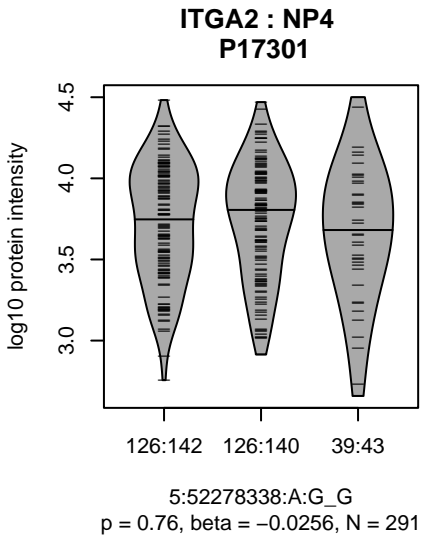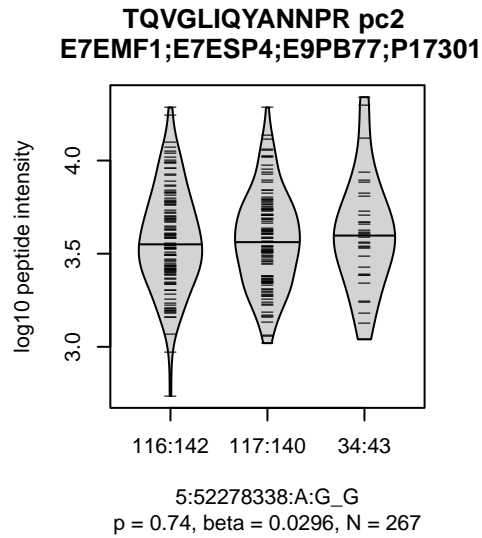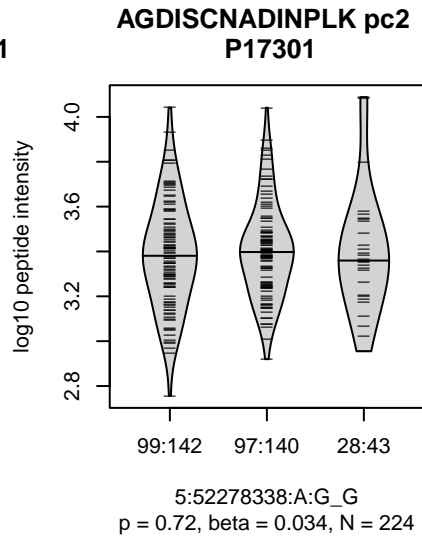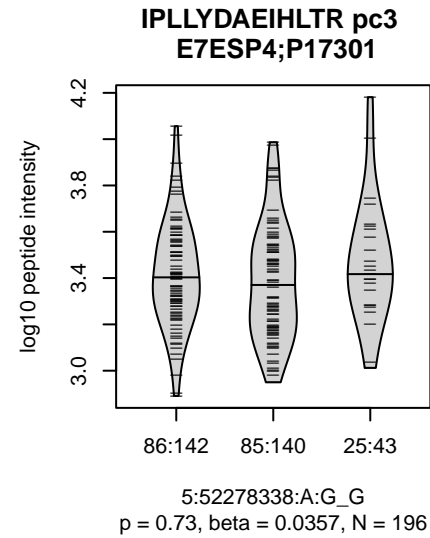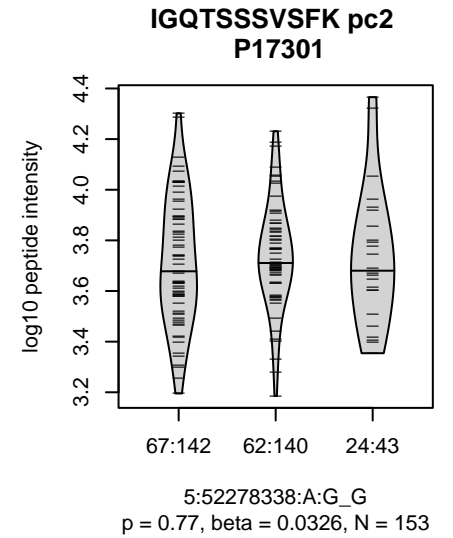

Assay Target: ITGA2  
Olink UniProt: P17301  
UKB rsID: rs246414  
Proxy rsID: rs246414  
UKB SNP: 5:52278338:A:G  
Proxy SNP: 5:52278338:A:G  
UKB log10(p): 1859.1  
UKB BETA: 0.589  
-----  
1131:1038:1030:1006:969:921:9

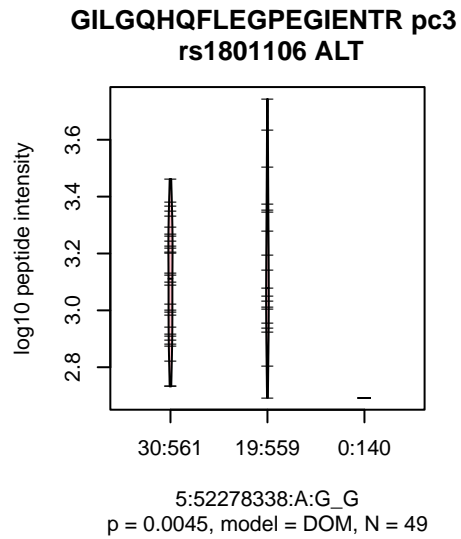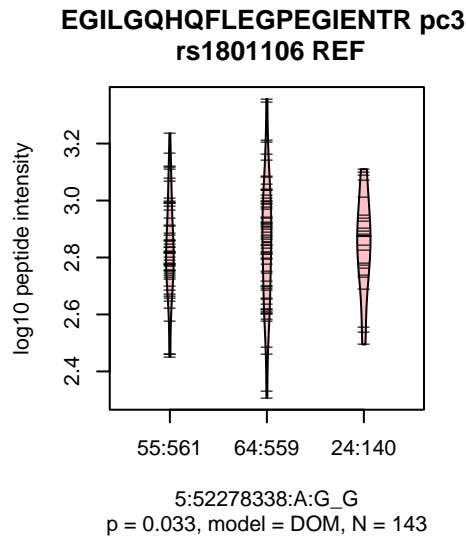





**INHBC : NP2  
P55103**

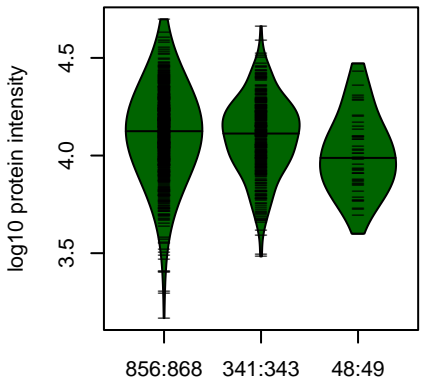

12:57844049:C:T\_T  
p = 0.00015, beta = -0.193, N = 1245

**ELLLDLAK pc2  
P55103**

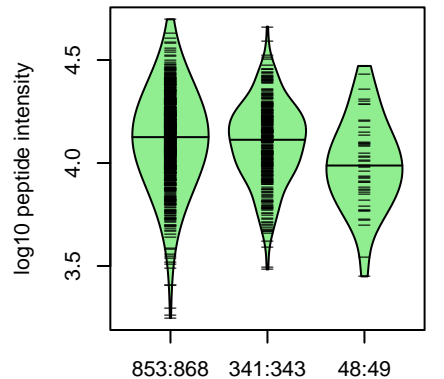

12:57844049:C:T\_T  
p = 7.8e-05, beta = -0.201, N = 1242

**GIDCQGGSR pc2  
P55103**

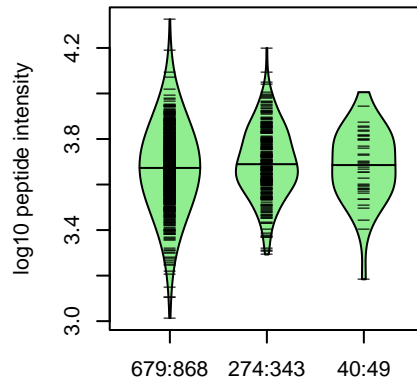

12:57844049:C:T\_T  
p = 0.13, beta = 0.0855, N = 993

**LDFHFSSDR pc2  
P55103**

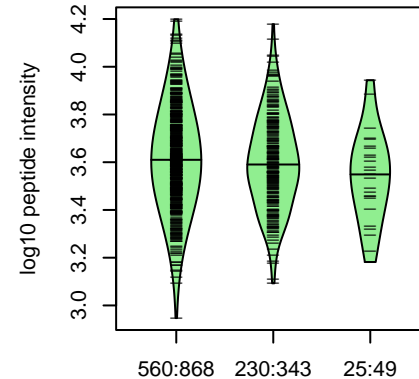

12:57844049:C:T\_T  
p = 0.02, beta = -0.151, N = 815

**QEFFVDFR pc2  
P55103**

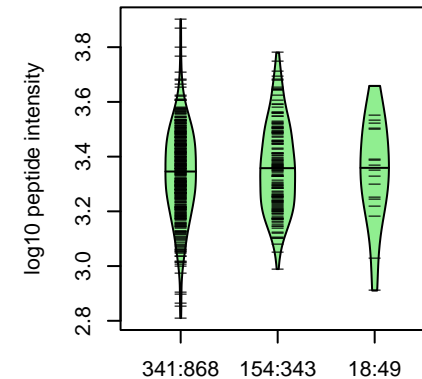

12:57844049:C:T\_T  
p = 0.19, beta = 0.103, N = 513

**INHBC : NP2  
P55103**

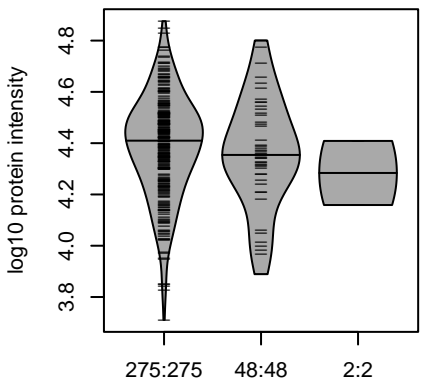

12:57844049:C:T\_T  
p = 0.41, beta = -0.118, N = 325

**ELLLDLAK pc2  
P55103**

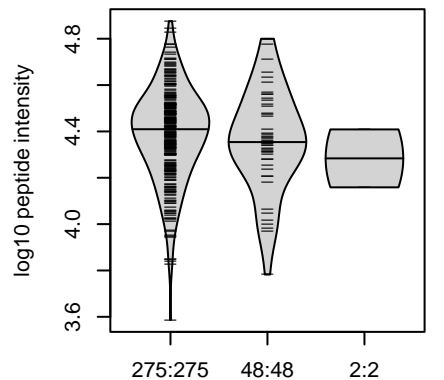

12:57844049:C:T\_T  
p = 0.44, beta = -0.111, N = 325

**GIDCQGGSR pc2  
P55103**

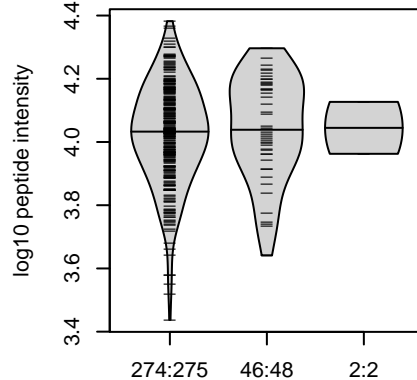

12:57844049:C:T\_T  
p = 0.31, beta = 0.148, N = 322

**LDFHFSSDR pc2  
P55103**

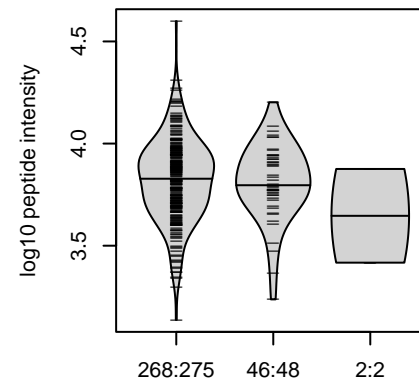

12:57844049:C:T\_T  
p = 0.37, beta = -0.131, N = 316

**AGGQCPACGGPTLELESQR pc3  
P55103**

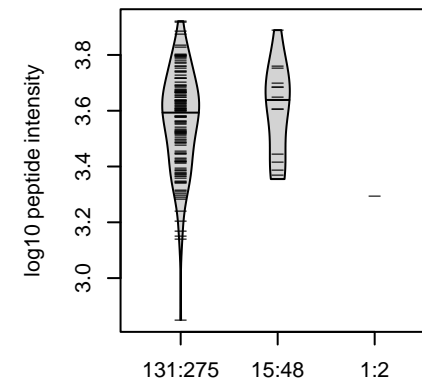

12:57844049:C:T\_T  
p = 0.7, beta = 0.0924, N = 147

Assay Target: INHBC  
Olink UniProt: P55103  
UKB rsID: rs3741414  
Proxy rsID: rs3741414  
UKB SNP: 12:57844049:C:T  
Proxy SNP: 12:57844049:C:T  
UKB log10(p): 1817.4  
UKB BETA: -0.655  
\*:-:-:-:-  
1242:993:815:513:260

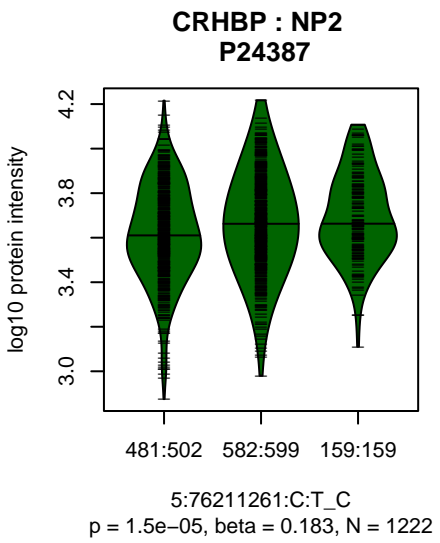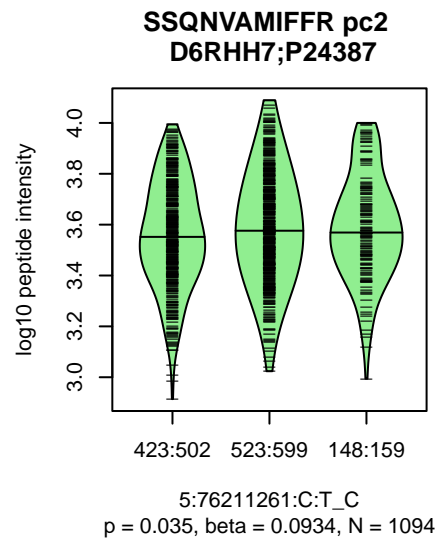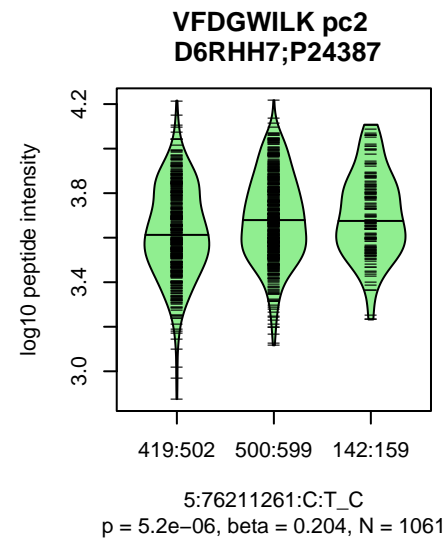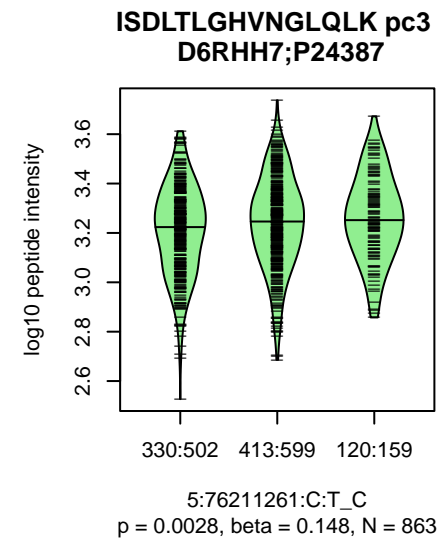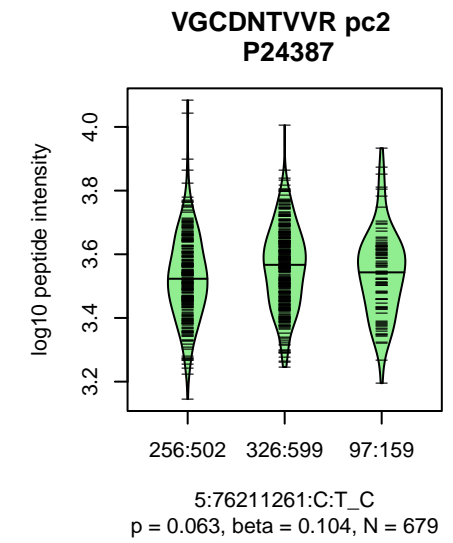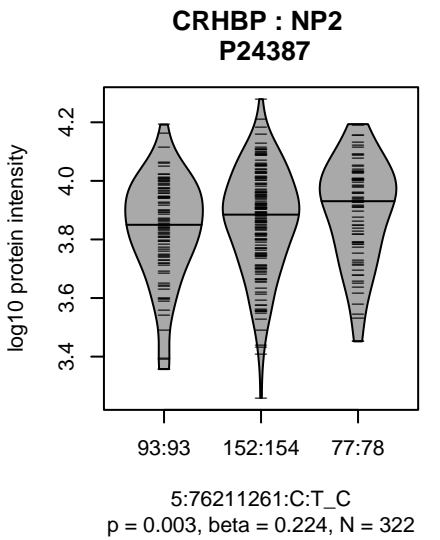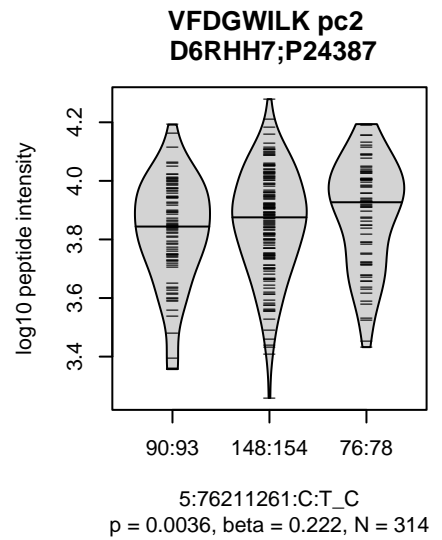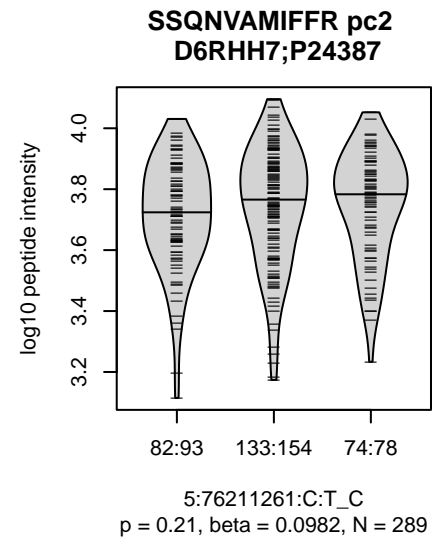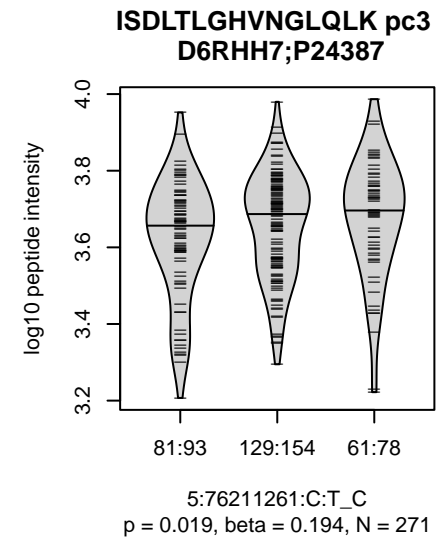

Assay Target: CRHBP  
 Olink UniProt: P24387  
 UKB rsID: rs1700657  
 Proxy rsID: rs1700657  
 UKB SNP: 5:76211261:C:T  
 Proxy SNP: 5:76211261:C:T  
 UKB log10(p): 1809.2  
 UKB BETA: -0.569  
 -\*:\*-:-  
 1094:1061:863:679:181



**KLK10 : NP3**  
**O43240**

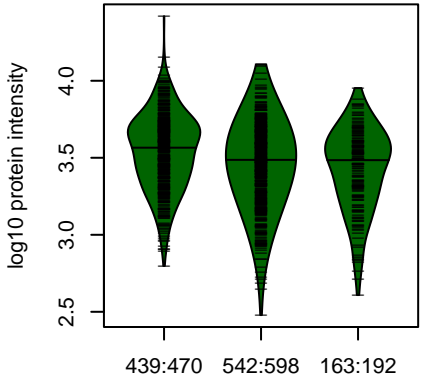

19:51523203:T:C\_T  
p = 6.1e-07, beta = -0.213, N = 1144

**GLTCSSITILSPK pc2**  
**O43240**

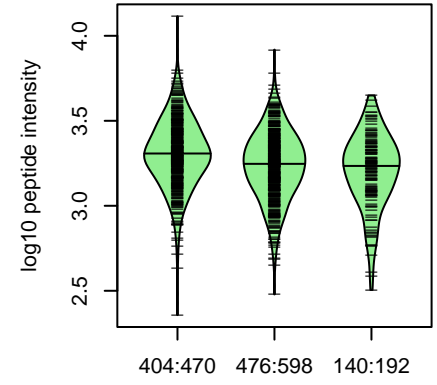

19:51523203:T:C\_T  
p = 2.3e-07, beta = -0.235, N = 1020

**ALQLPYR pc2**  
**O43240**

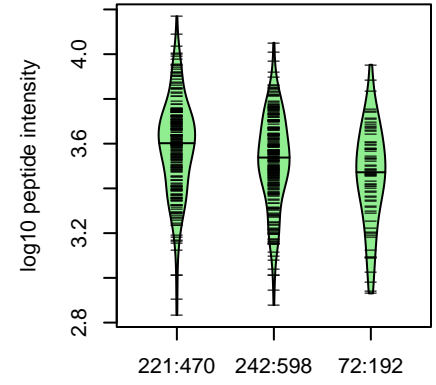

19:51523203:T:C\_T  
p = 1.2e-05, beta = -0.272, N = 535

**RTDEHDLMLLK pc3**  
**O43240**

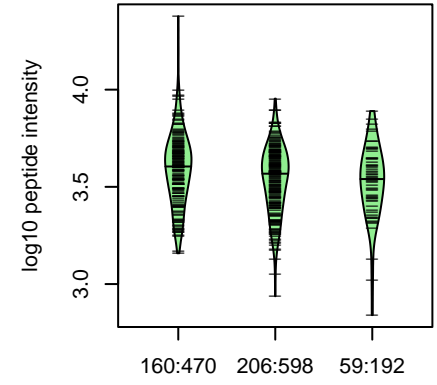

19:51523203:T:C\_T  
p = 0.005, beta = -0.198, N = 425

**YHQGSGPILPR pc2**  
**O43240**

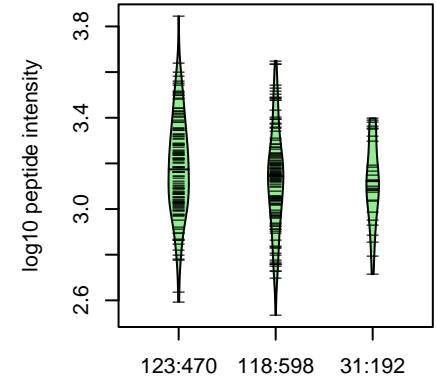

19:51523203:T:C\_T  
p = 0.059, beta = -0.168, N = 272

**LDPEAYGAPCAR pc2**  
**rs3745535 ALT**

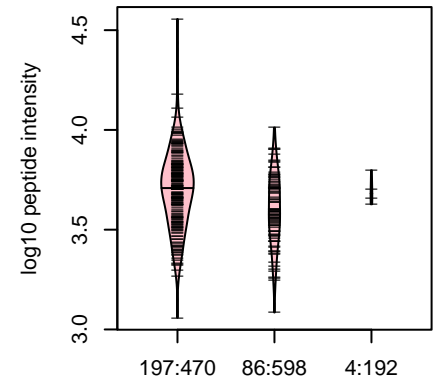

19:51523203:T:C\_T  
p = 6.1e-35, model = REC, N = 287

Assay Target: KLK10  
Olink UniProt: O43240  
UKB rsID: rs2569454  
Proxy rsID: rs2569454  
UKB SNP: 19:51523203:T:C  
Proxy SNP: 19:51523203:T:C  
UKB log10(p): 1762.7  
UKB BETA: 0.576  
\*.\*.\*.-.-.-:NA:NA  
1020:535:425:272:248:86:76:5:4

**LGALS3 : NP3**  
**P17931**

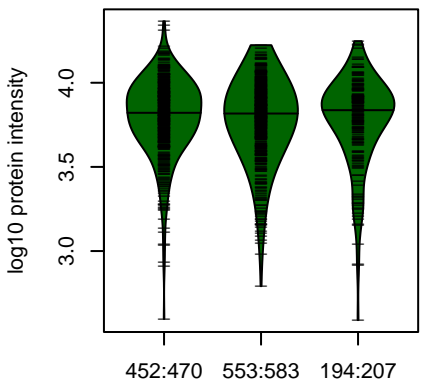

14:55610242:C:A\_A  
p = 0.22, beta = -0.0501, N = 1199

**VAVNDAHLLQYNHR pc3**  
**P17931**

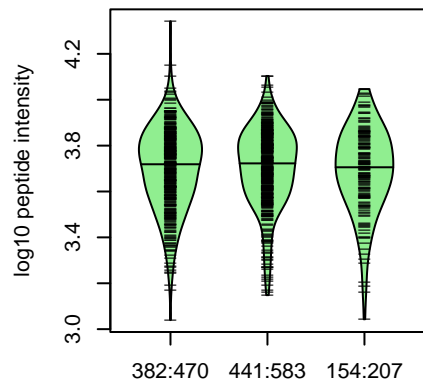

14:55610242:C:A\_A  
p = 0.39, beta = -0.0391, N = 977

**IALDFQR pc2**  
**G3V3R6;P17931**

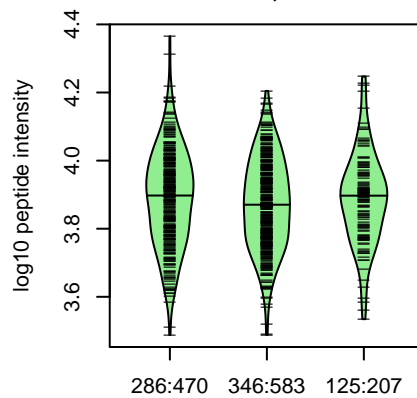

14:55610242:C:A\_A  
p = 0.4, beta = -0.0429, N = 757

**IQVLVEPDHFK pc3**  
**P17931**

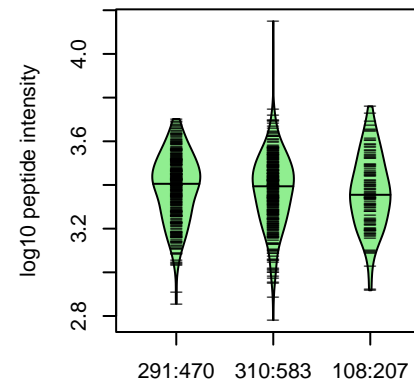

14:55610242:C:A\_A  
p = 0.12, beta = -0.0828, N = 709

**GNDVAFHFNPR pc3**  
**G3V3R6;P17931**

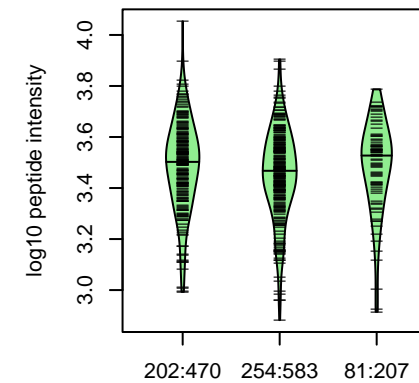

14:55610242:C:A\_A  
p = 0.31, beta = -0.0628, N = 537

**LGALS3 : NP3**  
**P17931**

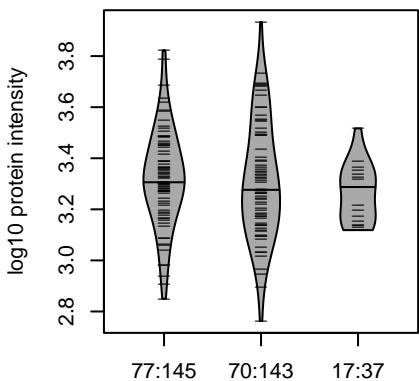

14:55610242:C:A\_A  
p = 0.34, beta = -0.11, N = 164

**VAVNDAHLLQYNHR pc3**  
**P17931**

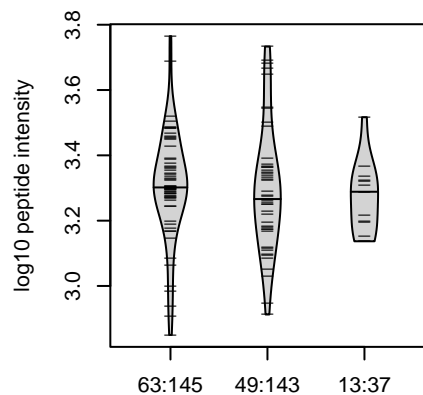

14:55610242:C:A\_A  
p = 0.33, beta = -0.128, N = 125

**IQVLVEPDHFK pc3**  
**P17931**

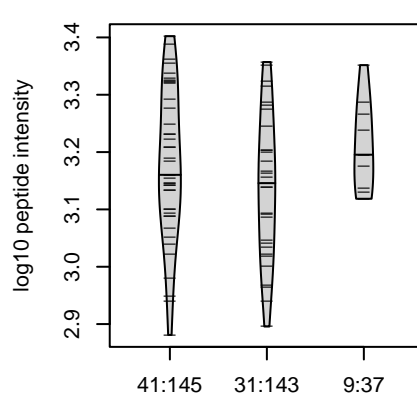

14:55610242:C:A\_A  
p = 0.96, beta = -0.0087, N = 81

Assay Target: LGALS3  
Olink UniProt: P17931  
UKB rsID: rs3832943  
Proxy rsID: rs6573005  
UKB SNP: 14:55606801:A:AAT  
Proxy SNP: 14:55610242:C:A  
UKB log10(p): 1725.9  
UKB BETA: -0.526  
-----  
977:757:709:658:537:280:231:1



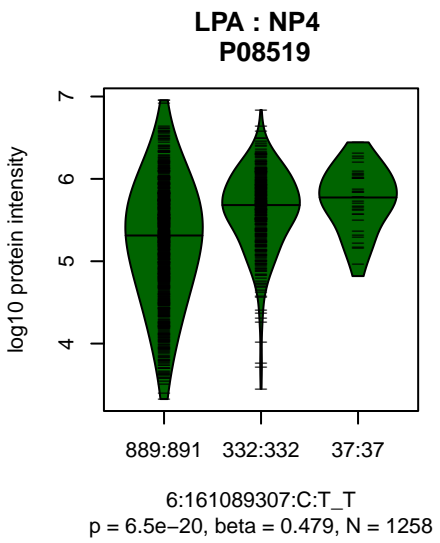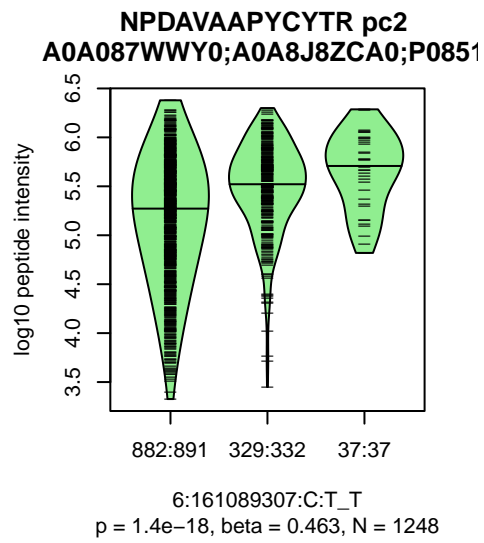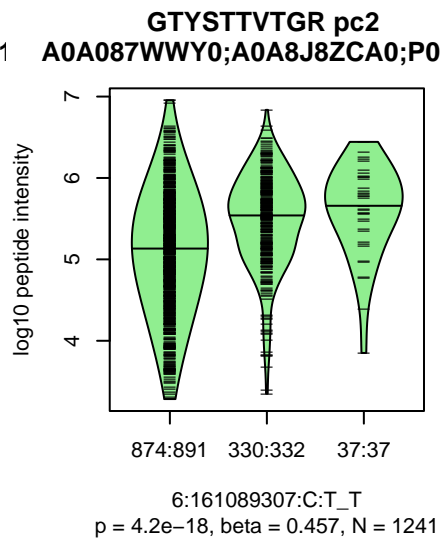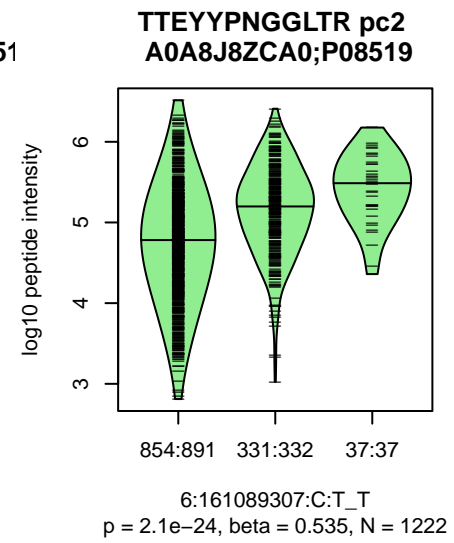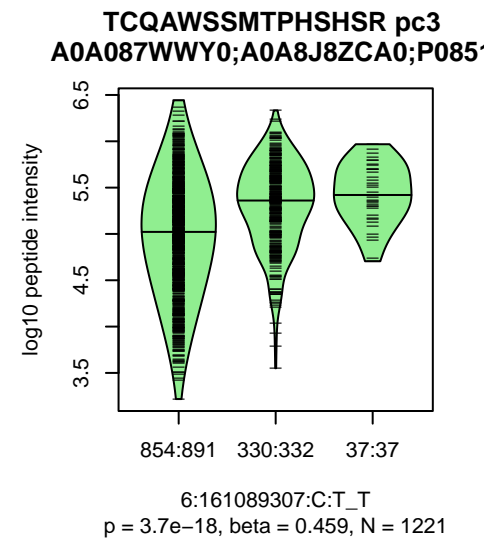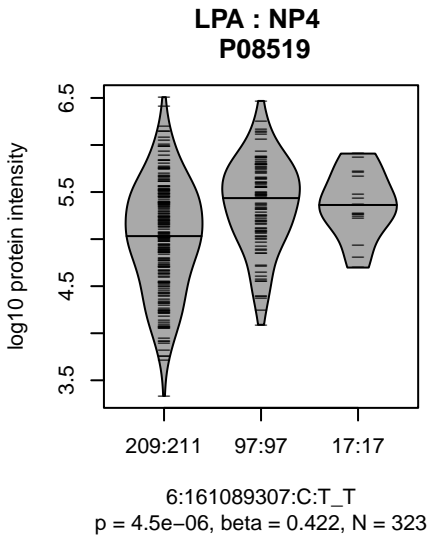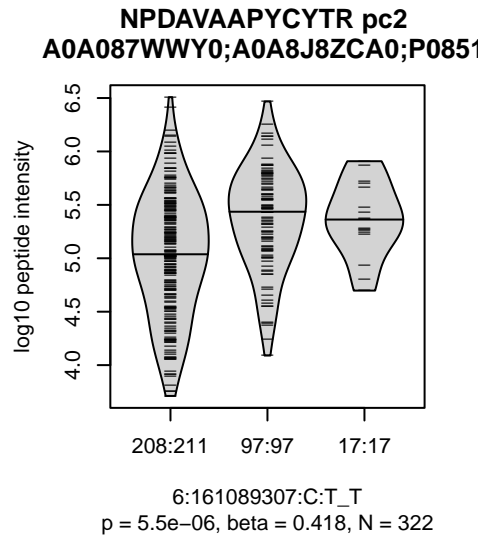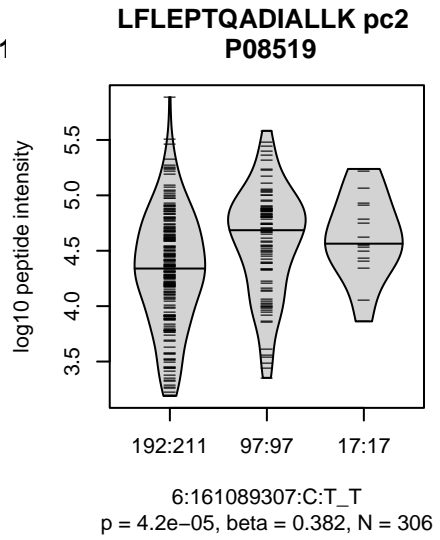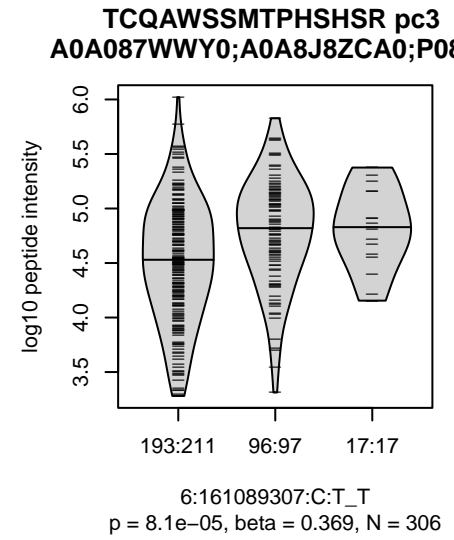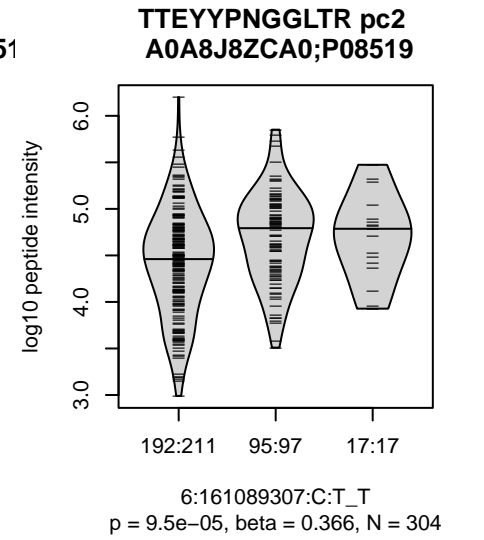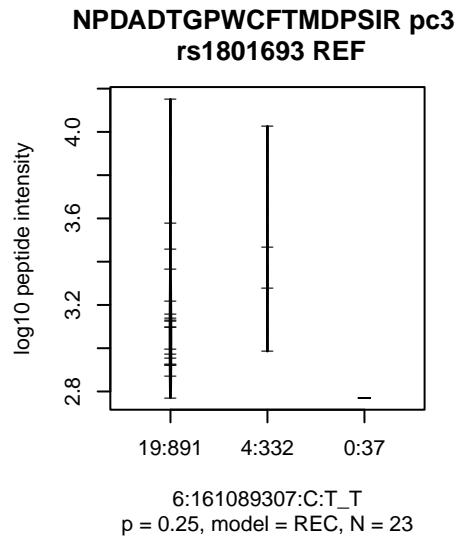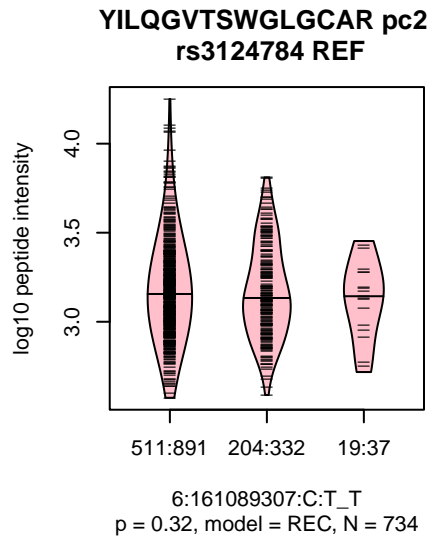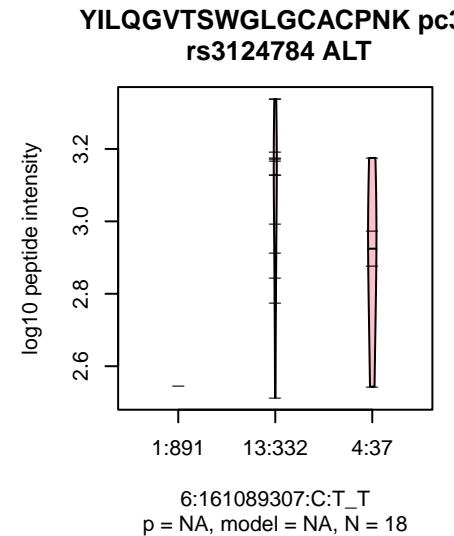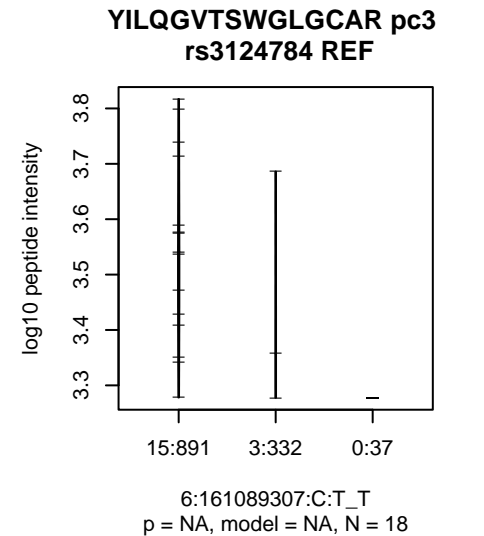

Assay Target: LPA  
Olink UniProt: P08519  
UKB rsID: rs56393506  
Proxy rsID: rs56393506  
UKB SNP: 6:161089307:C:T  
Proxy SNP: 6:161089307:C:T  
UKB log10(p): 1600.5  
UKB BETA: 0.722  
\*\*\*\*\*  
1248:1241:1222:1221:1218:120





**CES1 : NP2**  
P23141;P23141-2;P23141-3

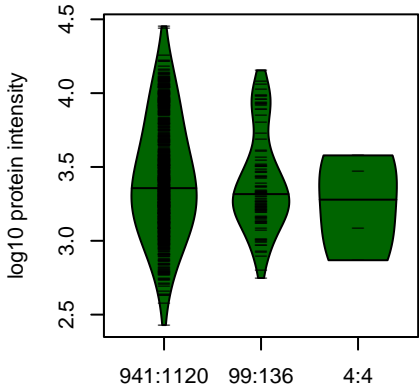

16:55860775:G:A\_A  
p = 0.53, beta = -0.0608, N = 1044

**EVAFWTNLFAK pc2**  
P23141;P23141-2;P23141-3

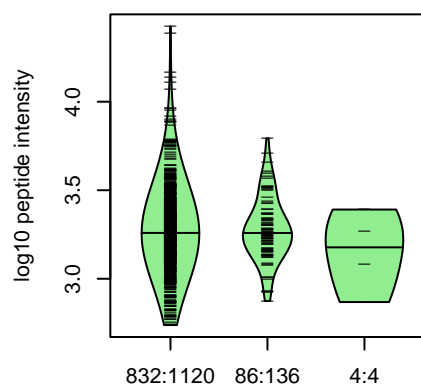

16:55860775:G:A\_A  
p = 0.47, beta = 0.0742, N = 922

**AISESGVALTSVLVK pc2**  
P23141;P23141-2;P23141-3

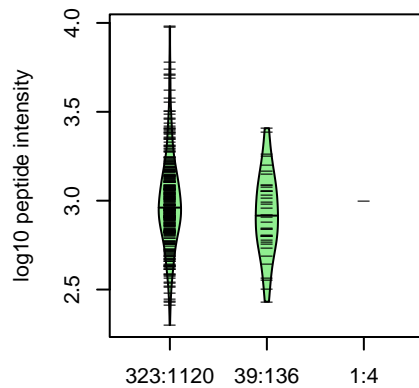

16:55860775:G:A\_A  
p = 0.26, beta = -0.18, N = 363

**FLSLDLQGDPK pc2**  
P23141;P23141-2;P23141-3

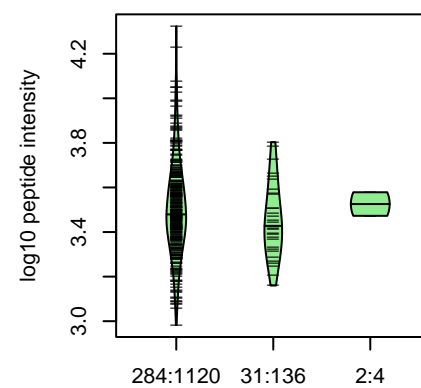

16:55860775:G:A\_A  
p = 0.55, beta = -0.0989, N = 317

**NFHTVPYMGVINK pc3**  
P23141;P23141-2;P23141-3

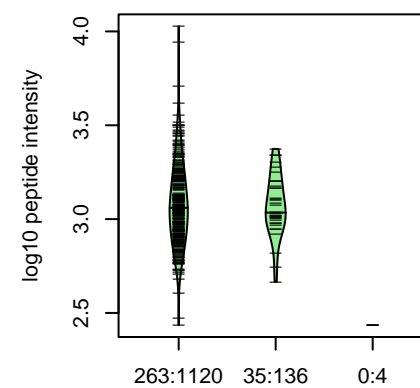

16:55860775:G:A\_A  
p = 0.92, beta = 0.0179, N = 298

**CES1 : NP2**  
P23141;P23141-2;P23141-3

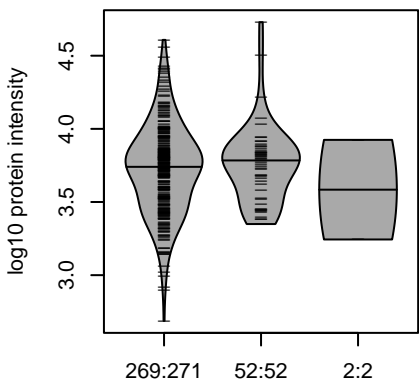

16:55860775:G:A\_A  
p = 0.66, beta = 0.0611, N = 323

**EVAFWTNLFAK pc2**  
P23141;P23141-2;P23141-3

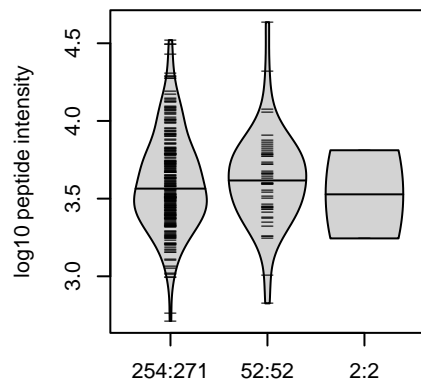

16:55860775:G:A\_A  
p = 0.62, beta = 0.0689, N = 308

**TVIGDHGDELFSVFGAPFLK pc3**  
P23141;P23141-2;P23141-3

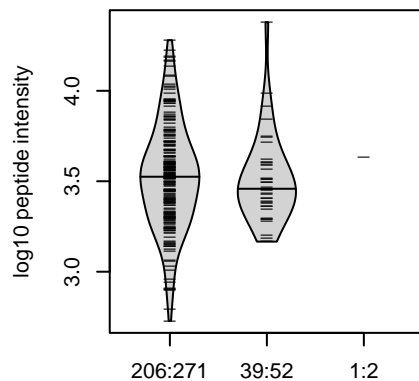

16:55860775:G:A\_A  
p = 1, beta = 0.000374, N = 246

**EGYLQIGANTQAAQK pc2**  
P23141;P23141-2;P23141-3

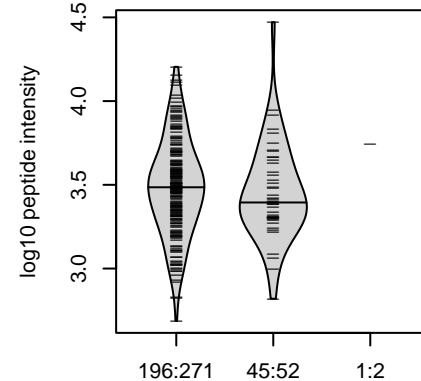

16:55860775:G:A\_A  
p = 0.6, beta = -0.0822, N = 242

**FLSLDLQGDPK pc2**  
P23141;P23141-2;P23141-3

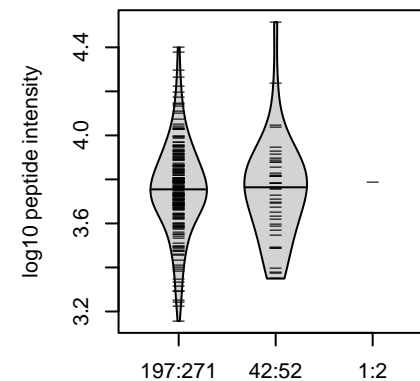

16:55860775:G:A\_A  
p = 0.92, beta = -0.0152, N = 240

Assay Target: CES1  
Olink UniProt: P23141  
UKB rsID: rs28547561  
Proxy rsID: rs28547561  
UKB SNP: 16:55860775:G:A  
Proxy SNP: 16:55860775:G:A  
UKB log10(p): 1568  
UKB BETA: -1.136  
-----|  
922:363:317:298:235:230:221:2

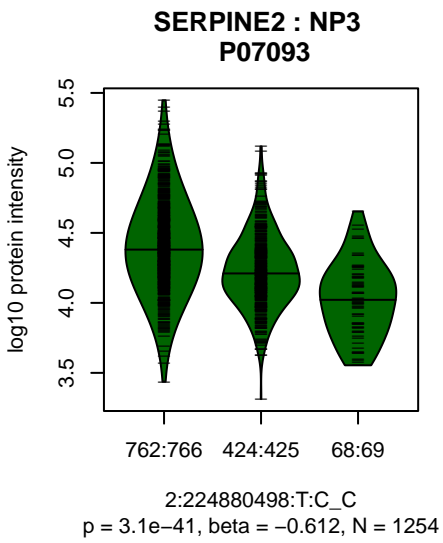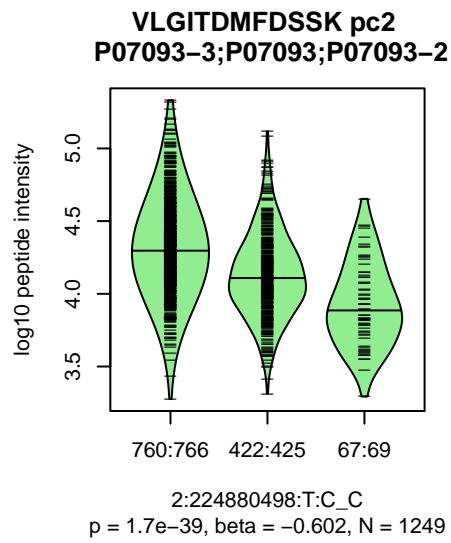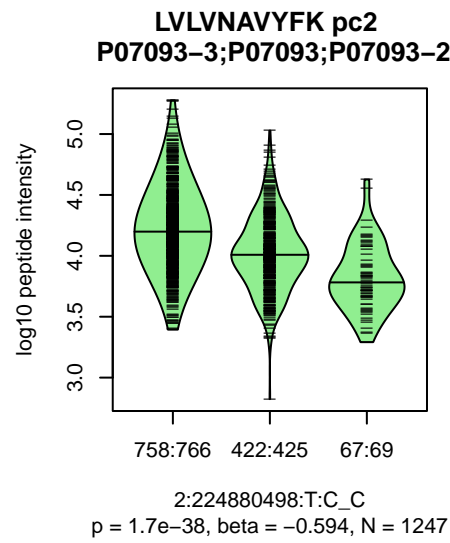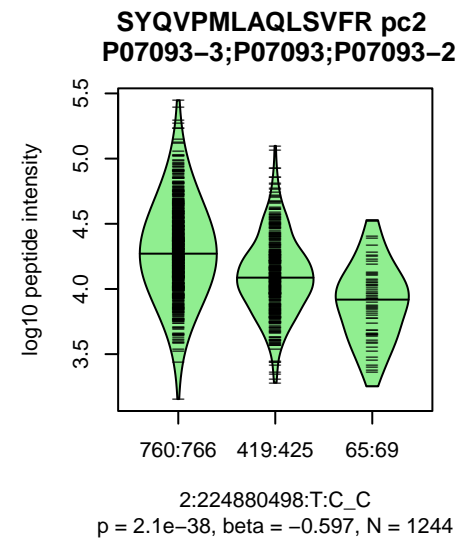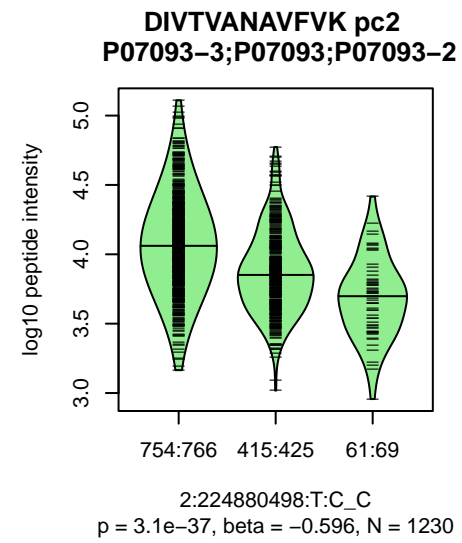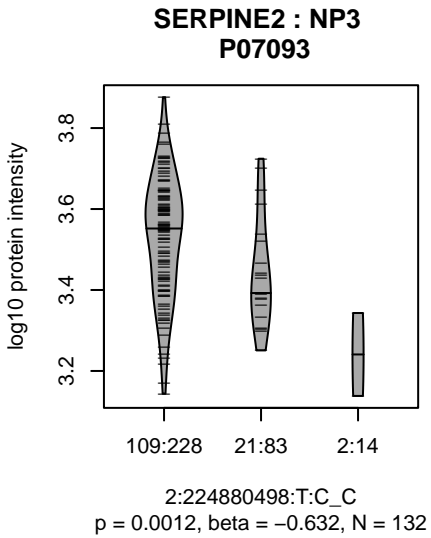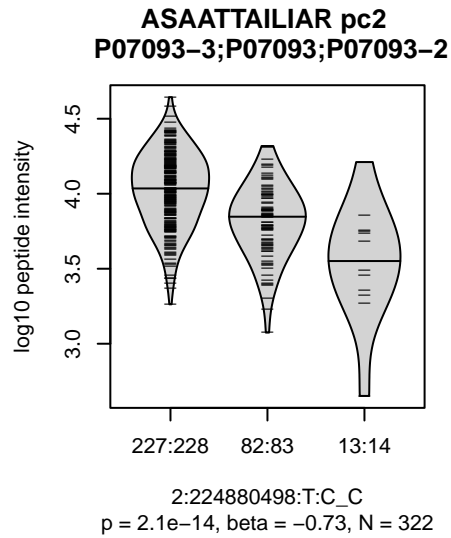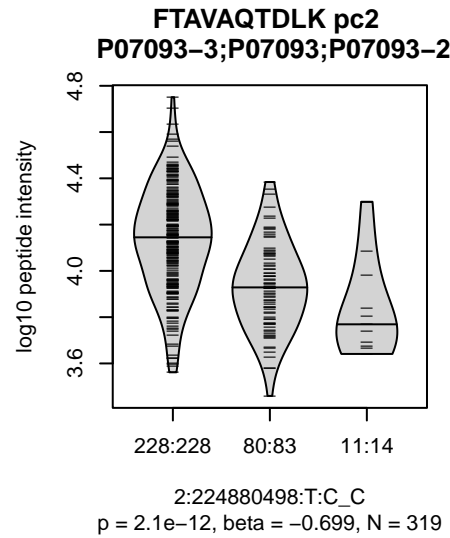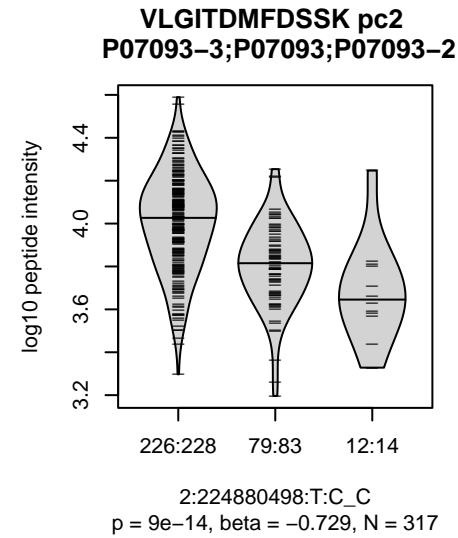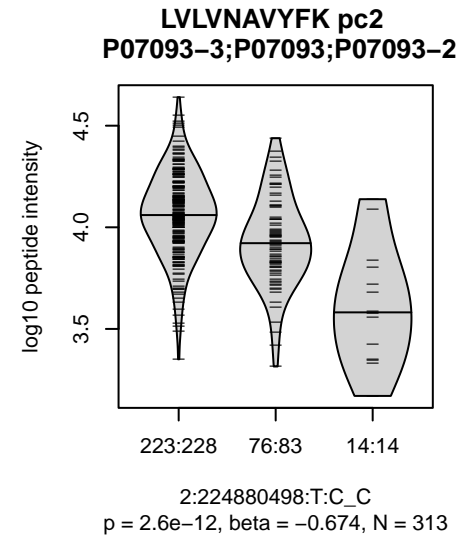

Assay Target: SERPINE2  
 Olink UniProt: P07093  
 UKB rsID: rs68066031  
 Proxy rsID: rs68066031  
 UKB SNP: 2:224880498:T:C  
 Proxy SNP: 2:224880498:T:C  
 UKB log10(p): 1562.2  
 UKB BETA: -0.63  
 \*\*\*\*\*-:-N  
 1249:1247:1244:1230:1204:118

**SERPINA4 : NP4  
P29622**

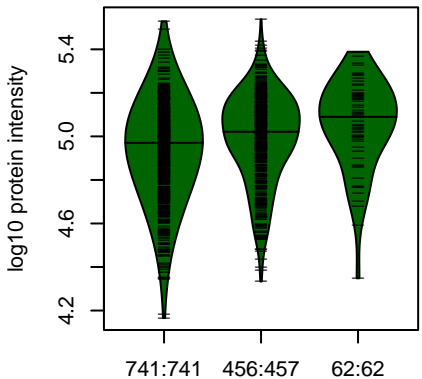

14:95033595:A:T\_T  
p = 3.4e-10, beta = 0.297, N = 1259

**GDATVFFILPNQ GK pc2  
P29622**

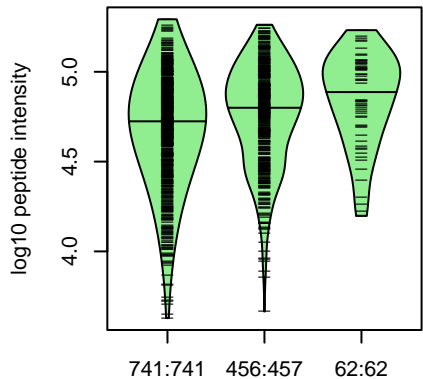

14:95033595:A:T\_T  
p = 6.2e-09, beta = 0.275, N = 1259

**LGFTDLFSK pc2  
P29622**

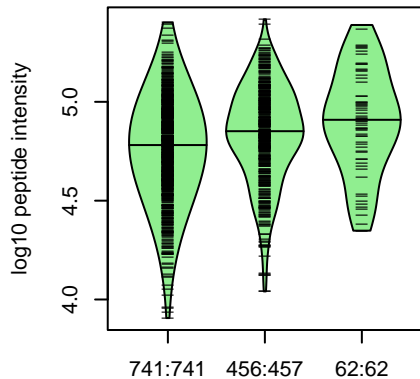

14:95033595:A:T\_T  
p = 2.5e-09, beta = 0.282, N = 1259

**WADLSGITK pc2  
P29622**

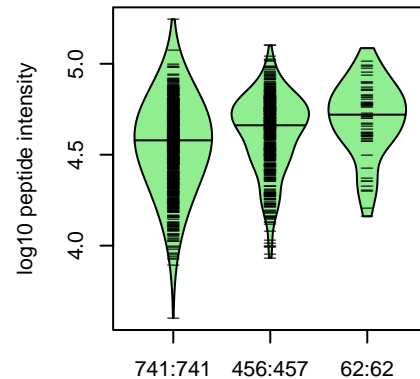

14:95033595:A:T\_T  
p = 9.2e-12, beta = 0.322, N = 1259

**FFSAQTNR pc2  
P29622**

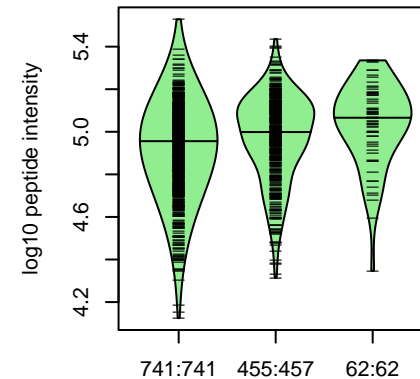

14:95033595:A:T\_T  
p = 5.8e-10, beta = 0.293, N = 1258

**SERPINA4 : NP4  
P29622**

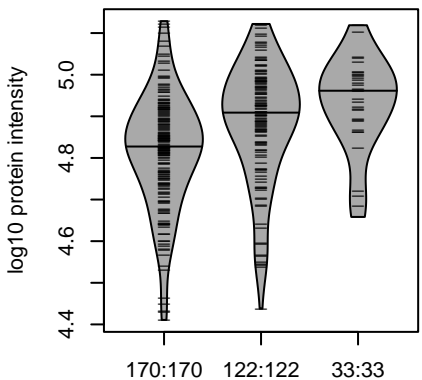

14:95033595:A:T\_T  
p = 5.4e-08, beta = 0.436, N = 325

**FFSAQTNR pc2  
P29622**

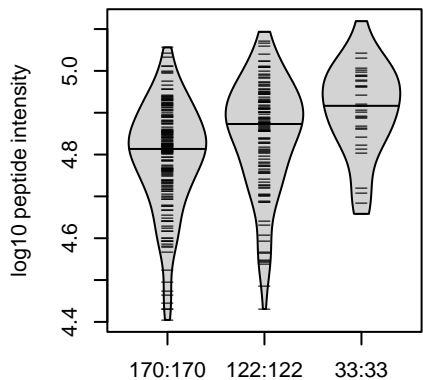

14:95033595:A:T\_T  
p = 1.9e-08, beta = 0.45, N = 325

**FSISGSYVLDQILPR pc2  
P29622**

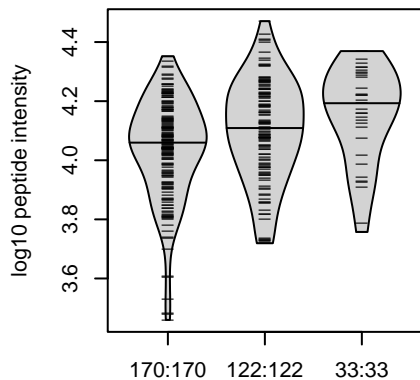

14:95033595:A:T\_T  
p = 1.6e-05, beta = 0.349, N = 325

**IAPANADFAFR pc2  
P29622**

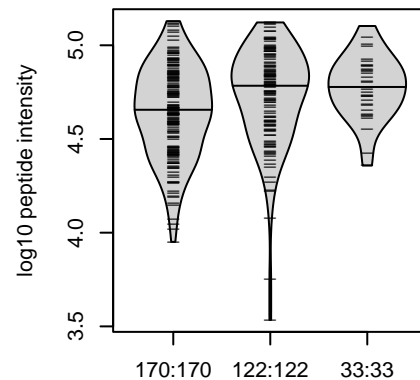

14:95033595:A:T\_T  
p = 0.00048, beta = 0.284, N = 325

**IVDLVSELK pc2  
P29622**

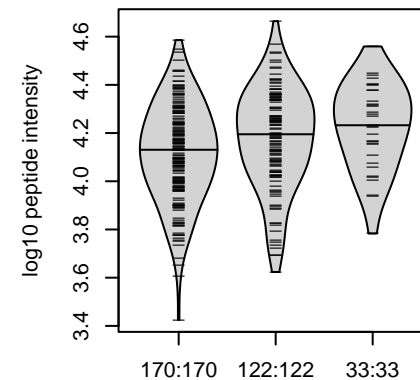

14:95033595:A:T\_T  
p = 0.0013, beta = 0.262, N = 325

Assay Target: SERPINA4  
Olink UniProt: P29622  
UKB rsID: rs5511  
Proxy rsID: rs5511  
UKB SNP: 14:95033595:A:T  
Proxy SNP: 14:95033595:A:T  
UKB log10(p): 1529.9  
UKB BETA: 0.612  
\*\*\*\*\*  
1259:1259:1259:1258:1258:125







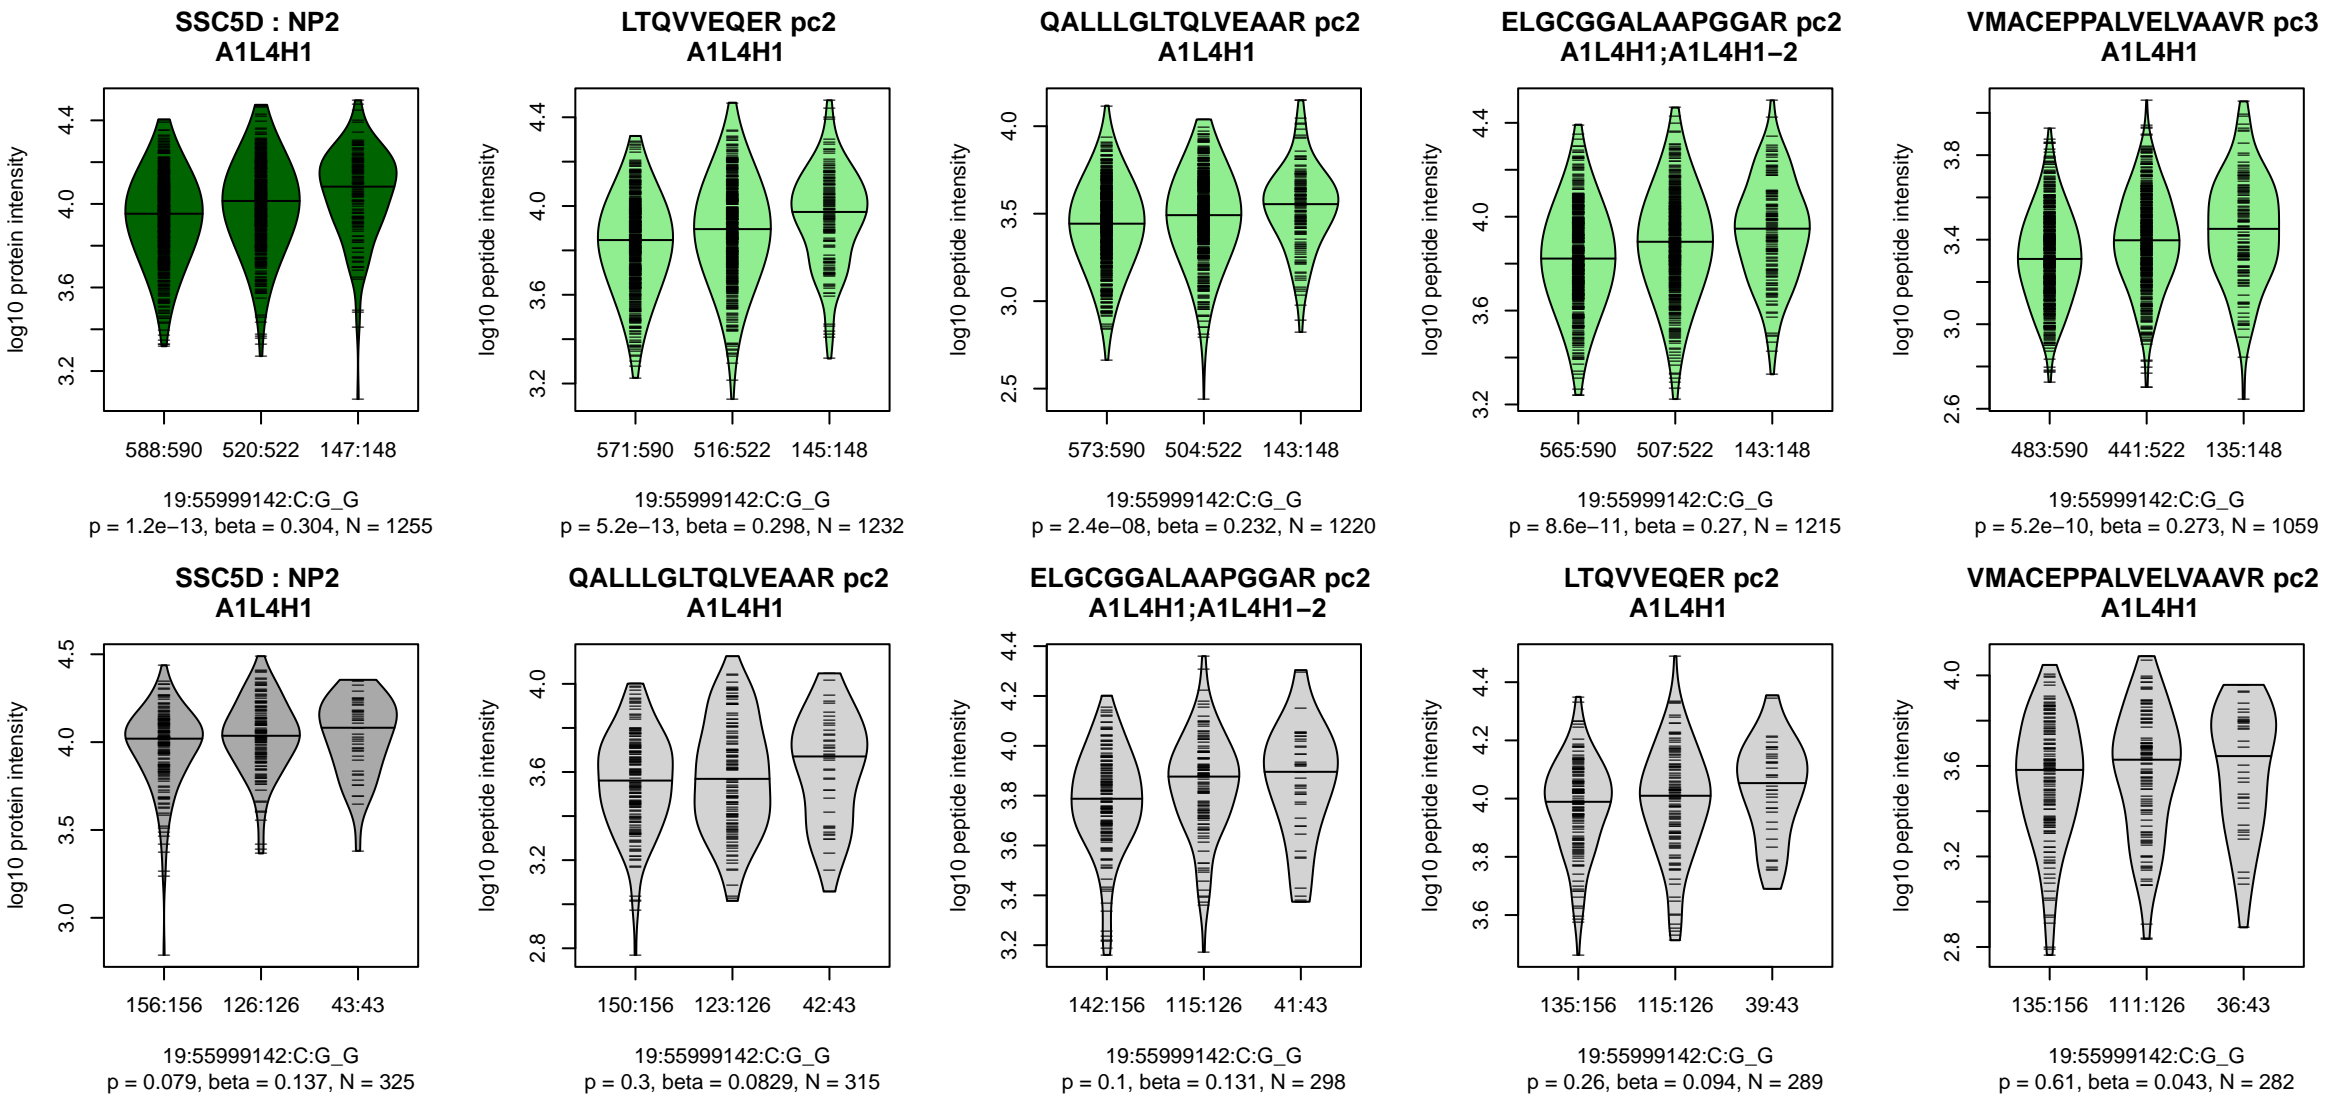

Assay Target: SSC5D  
 Olink UniProt: A1L4H1  
 UKB rsID: rs55799523  
 Proxy rsID: rs8103017  
 UKB SNP: 19:55999545:C:A  
 Proxy SNP: 19:55999142:C:G  
 UKB log10(p): 1347.2  
 UKB BETA: 0.53  
 .....  
 1232:1220:1215:1059:1050:100

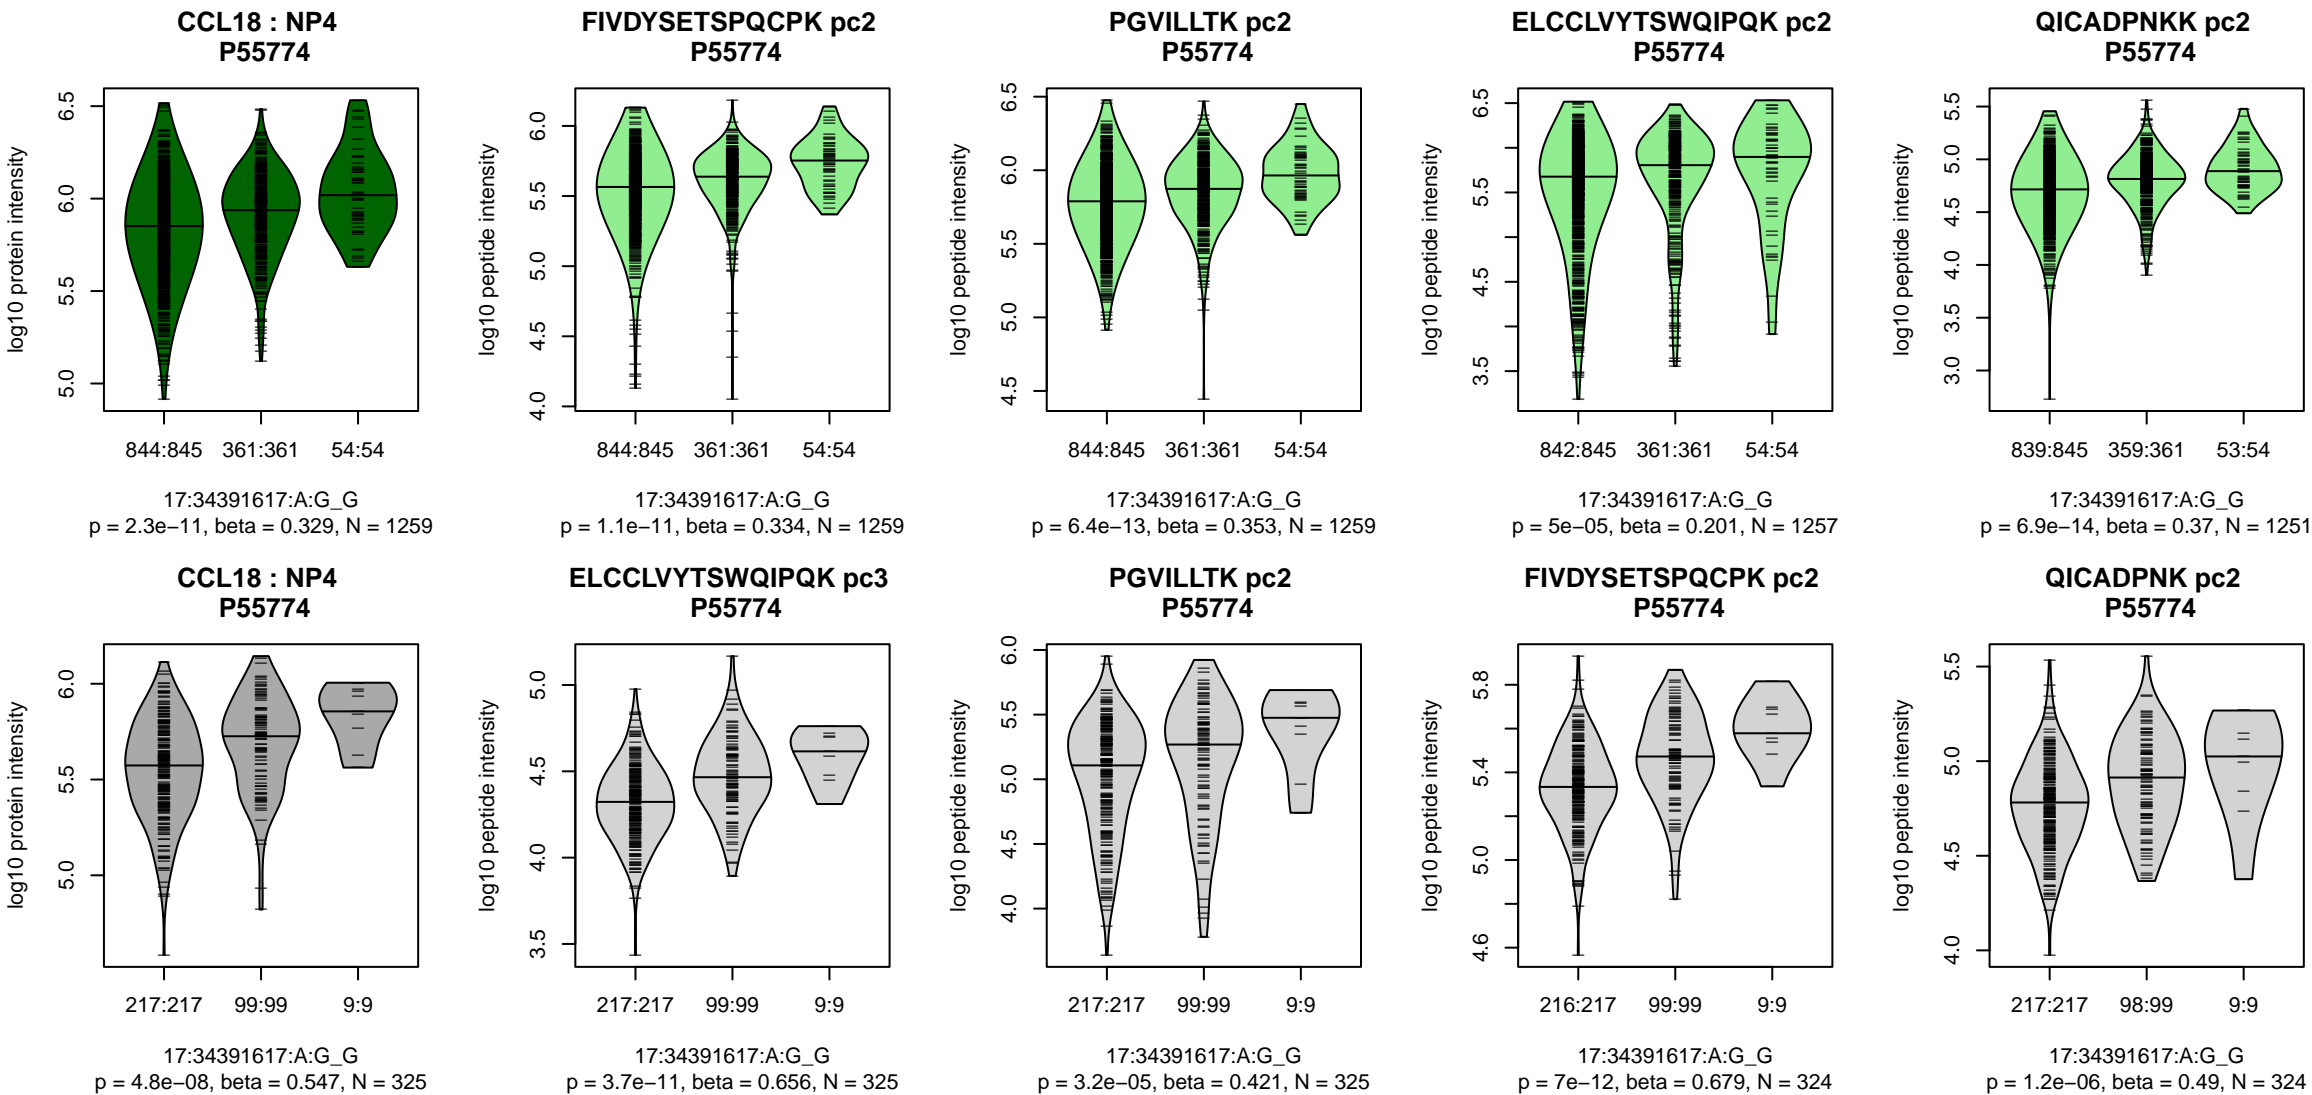

Assay Target: CCL18  
 Olink UniProt: P55774  
 UKB rsID: rs2015086  
 Proxy rsID: rs2015086  
 UKB SNP: 17:34391617:A:G  
 Proxy SNP: 17:34391617:A:G  
 UKB log<sub>10</sub>(p): 1335.8  
 UKB BETA: 0.68  
 \*.\*.\*.\*.\*.\*.\*.\*  
 1259:1259:1257:1257:1251:124





**CCL14 : NP4**  
**Q16627**

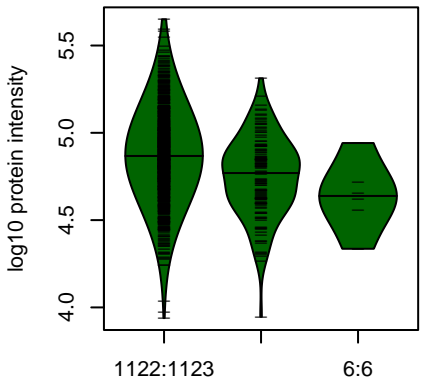

17:34312337:T:C\_C  
p = 2.3e-09, beta = -0.502, N = 1259

**PGIVFITK pc2**  
**A0A087X089;Q16627;Q16627-2**

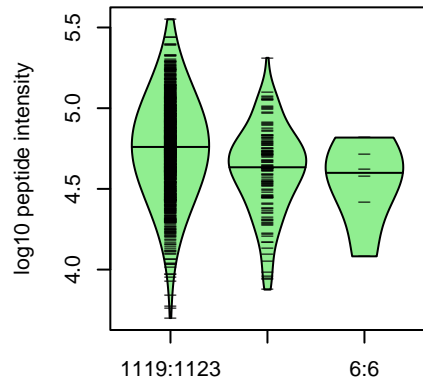

17:34312337:T:C\_C  
p = 5.1e-08, beta = -0.458, N = 1256

**WVQDYIK pc2**  
**A0A087X089;Q16627;Q16627-2**

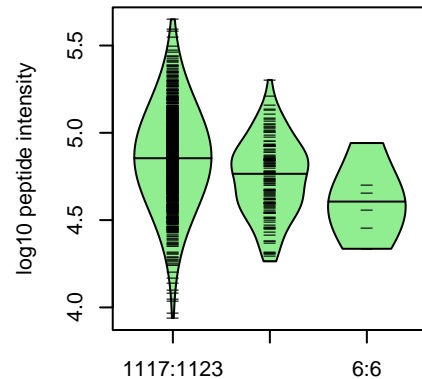

17:34312337:T:C\_C  
p = 2.6e-08, beta = -0.469, N = 1253

**IMDYETNSQCSK pc2**  
**A0A087X089;A0A0B4J2G5;Q16627;Q16627-2**

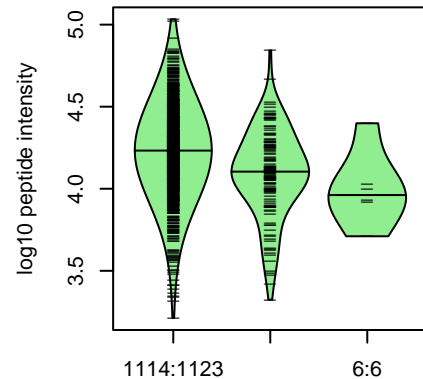

17:34312337:T:C\_C  
p = 1.3e-08, beta = -0.477, N = 1251

**GHSVCTNPSDK pc2**  
**A0A087X089;Q16627;Q16627-2**

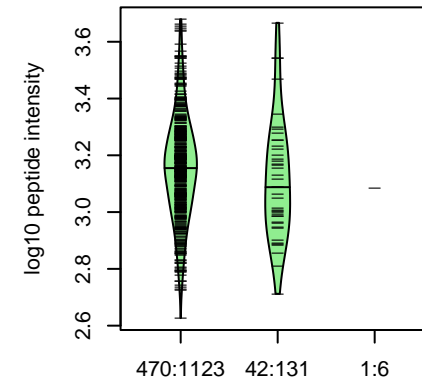

17:34312337:T:C\_C  
p = 0.11, beta = -0.245, N = 513

**CCL14 : NP4**  
**Q16627**

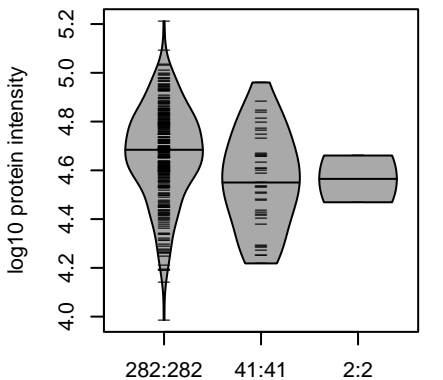

17:34312337:T:C\_C  
p = 0.0065, beta = -0.409, N = 325

**IMDYETNSQCSK pc3**  
**A0A087X089;A0A0B4J2G5;Q16627;Q16627-2**

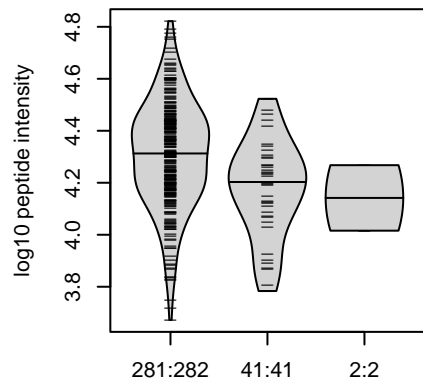

17:34312337:T:C\_C  
p = 0.00067, beta = -0.51, N = 324

**PGIVFITK pc2**  
**A0A087X089;Q16627;Q16627-2**

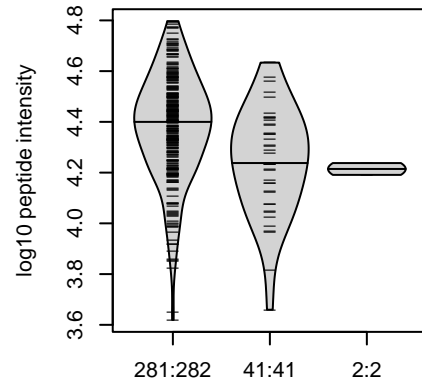

17:34312337:T:C\_C  
p = 0.00053, beta = -0.519, N = 324

**WVQDYIK pc2**  
**A0A087X089;Q16627;Q16627-2**

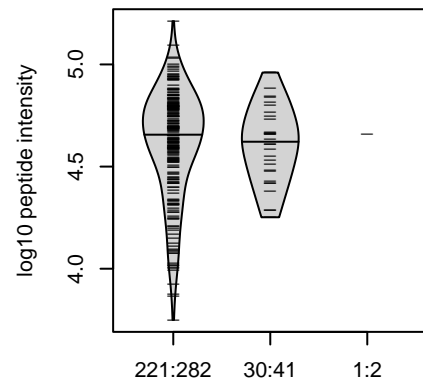

17:34312337:T:C\_C  
p = 0.93, beta = -0.015, N = 252

**GPYHPSECCFTYTTYK pc3**  
**A0A0B4J2G5;Q16627**

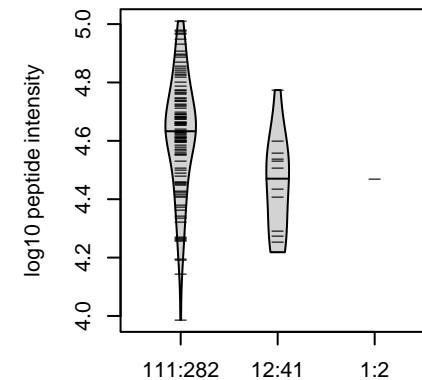

17:34312337:T:C\_C  
p = 0.046, beta = -0.509, N = 124

Assay Target: CCL14  
Olink UniProt: Q16627  
UKB rsID: rs9903158  
Proxy rsID: rs9903158  
UKB SNP: 17:34312337:T:C  
Proxy SNP: 17:34312337:T:C  
UKB log10(p): 1253.1  
UKB BETA: -0.997  
\*.\*.\*.-.-:NA  
1256:1253:1251:513:239:32



**IGFBP3 : NP4**  
P17936;P17936-2

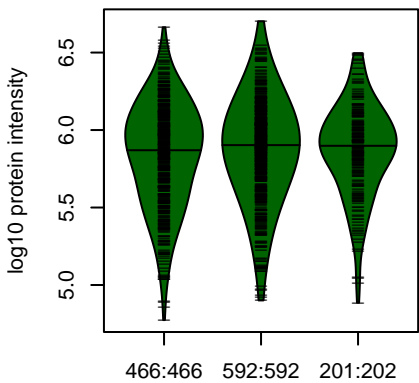

7:45960645:G:C\_C  
p = 0.25, beta = 0.0467, N = 1259

**ALAQCAPPAVCAELVR pc2**  
P17936;P17936-2

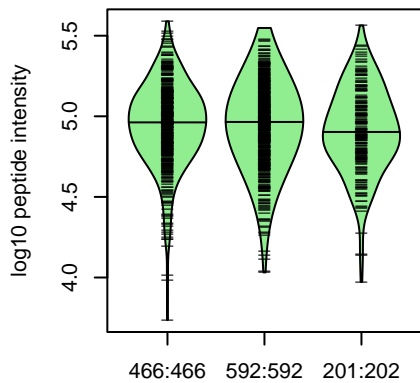

7:45960645:G:C\_C  
p = 0.3, beta = -0.0414, N = 1259

**GFCWCVDK pc2**  
B3KWK7;P17936;P17936-2

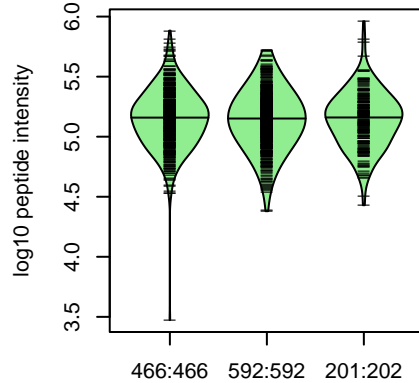

7:45960645:G:C\_C  
p = 0.63, beta = -0.0192, N = 1259

**EMEDTLNHLK pc2**  
B3KWK7;P17936;P17936-2

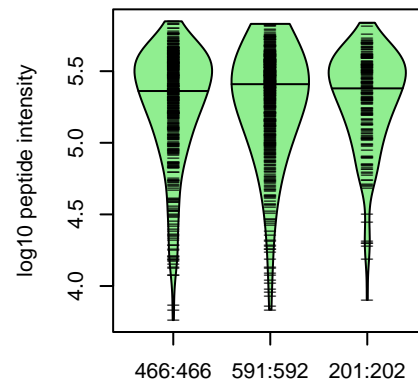

7:45960645:G:C\_C  
p = 0.2, beta = 0.0522, N = 1258

**REMEDTLNHLK pc3**  
B3KWK7;P17936;P17936-2

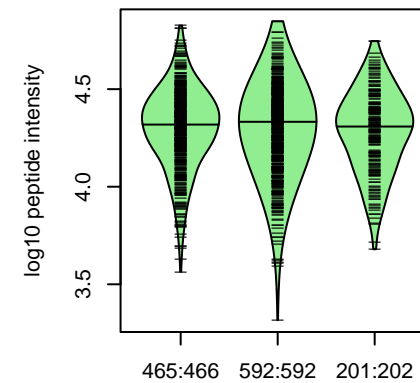

7:45960645:G:C\_C  
p = 0.66, beta = -0.0175, N = 1258

**IGFBP3 : NP4**  
P17936;P17936-2

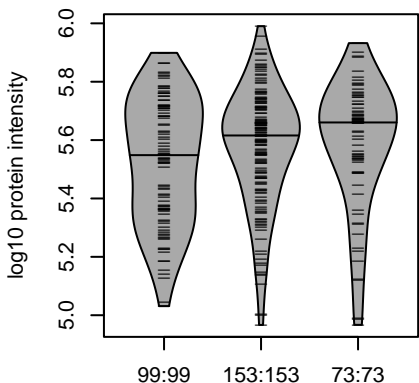

7:45960645:G:C\_C  
p = 0.35, beta = 0.0705, N = 325

**ALAQCAPPAVCAELVR pc2**  
P17936;P17936-2

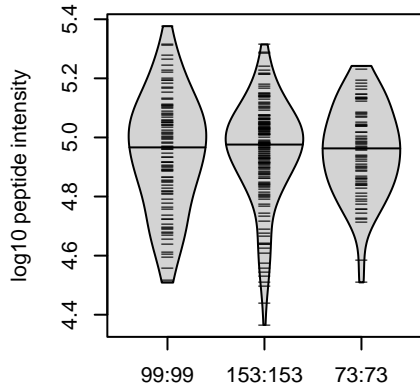

7:45960645:G:C\_C  
p = 0.81, beta = -0.0187, N = 325

**GFCWCVDK pc2**  
B3KWK7;P17936;P17936-2

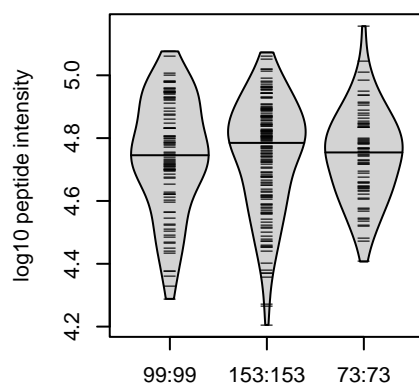

7:45960645:G:C\_C  
p = 0.55, beta = -0.0453, N = 325

**YGQLPLGYTTK pc2**  
B3KWK7;P17936;P17936-2

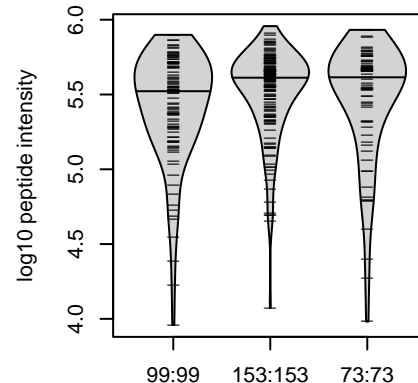

7:45960645:G:C\_C  
p = 0.94, beta = 0.00605, N = 325

**CQPSPDEARPLQALLDGR pc3**  
P17936;P17936-2

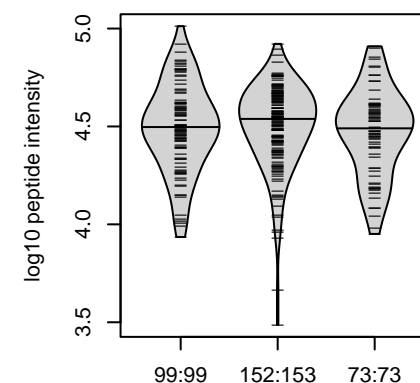

7:45960645:G:C\_C  
p = 0.59, beta = -0.0407, N = 324

Assay Target: IGFBP3  
Olink UniProt: P17936  
UKB rsID: rs2854746  
Proxy rsID: rs2854746  
UKB SNP: 7:45960645:G:C  
Proxy SNP: 7:45960645:G:C  
UKB log10(p): 1220.7  
UKB BETA: 0.451  
-----  
1259:1259:1258:1258:123

**AGASSAGLGPVVR pc2**  
rs2854746 REF

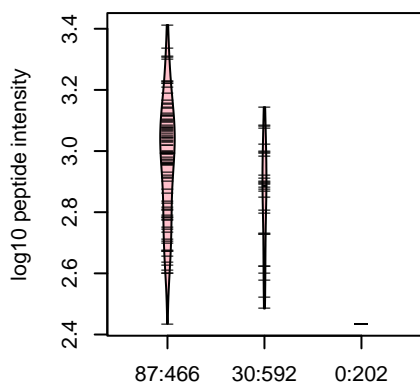

7:45960645:G:C\_C  
p = 9e-18, model = REC, N = 117

**AGASSGGLGPVVR pc2**  
rs2854746 ALT

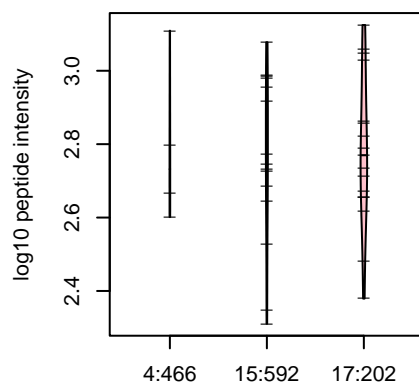

7:45960645:G:C\_C  
p = 8.2e-06, model = DOM, N = 36





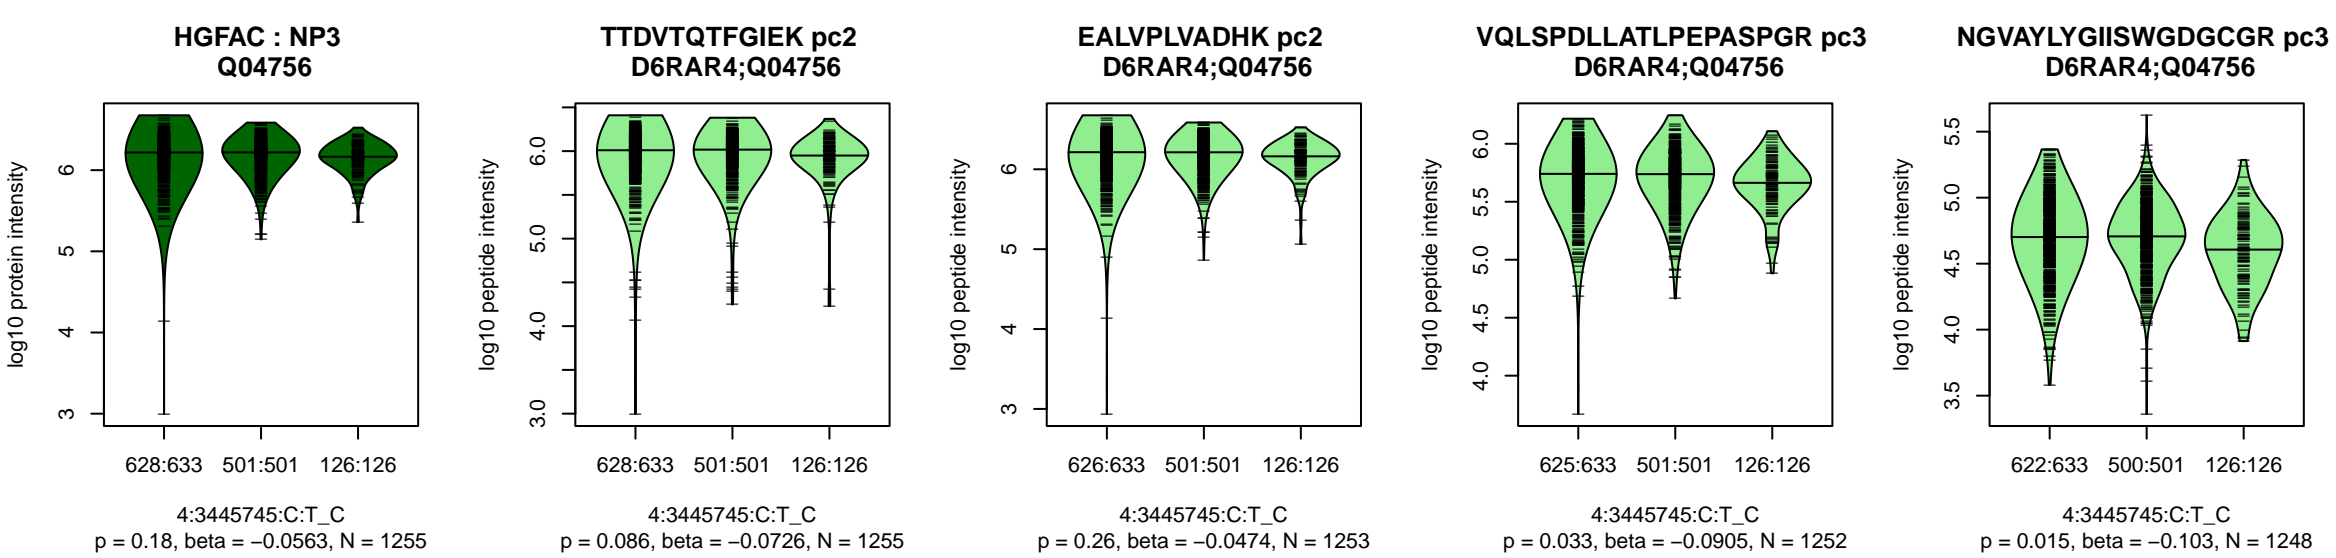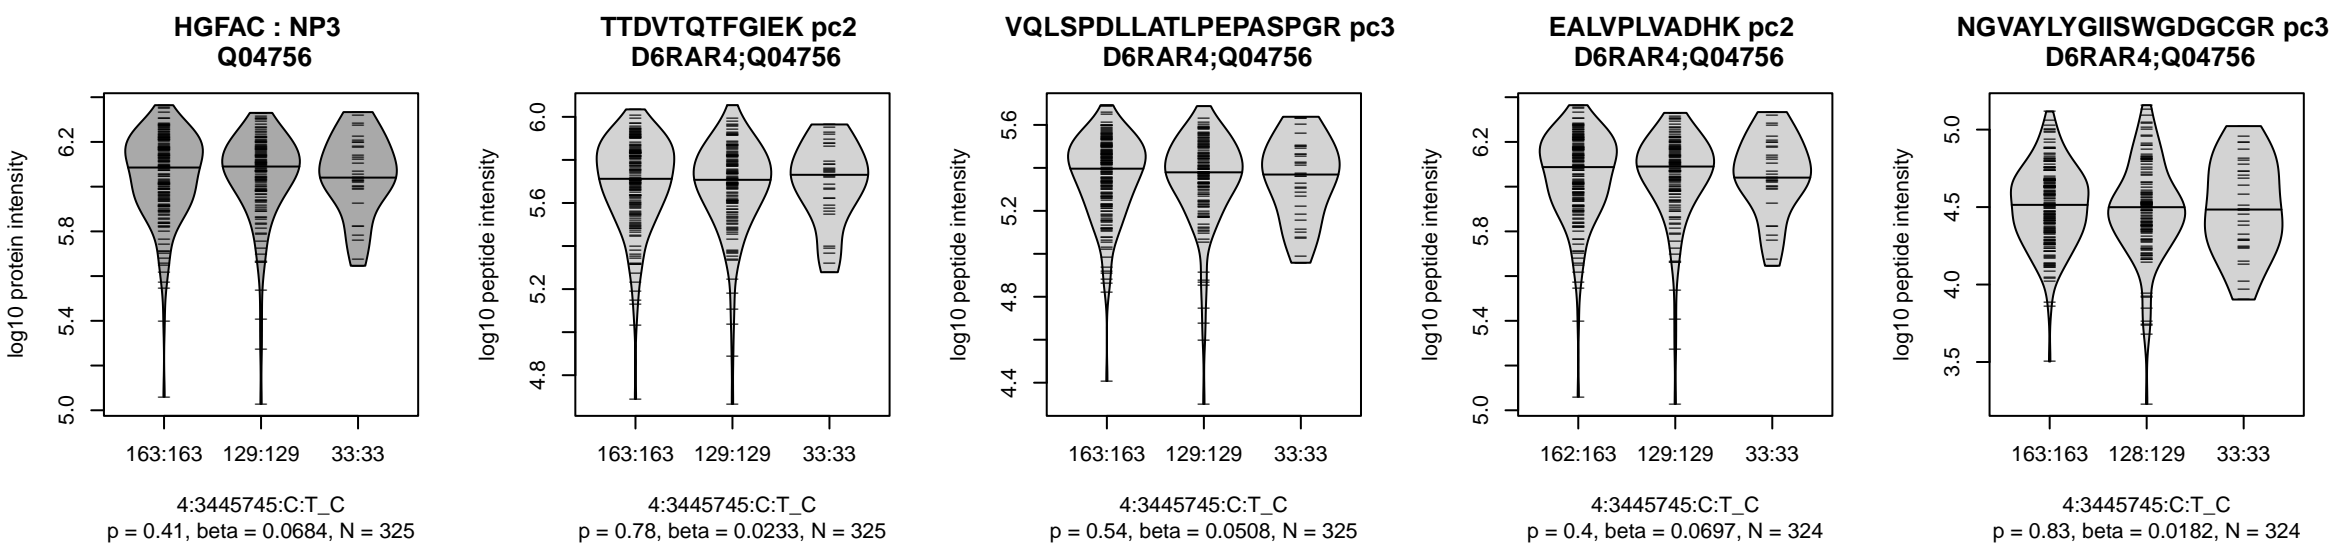

Assay Target: HGFAC  
 Olink UniProt: Q04756  
 UKB rsID: rs4690097  
 Proxy rsID: rs4690097  
 UKB SNP: 4:3445745:C:T  
 Proxy SNP: 4:3445745:C:T  
 UKB log10(p): 1192.8  
 UKB BETA: -0.491  
 -----  
 1255:1253:1252:1248:1235:123

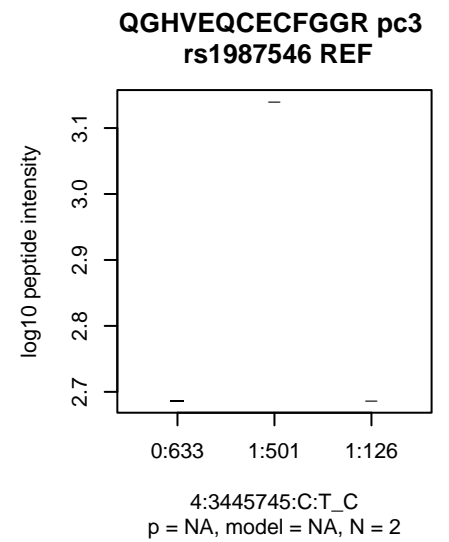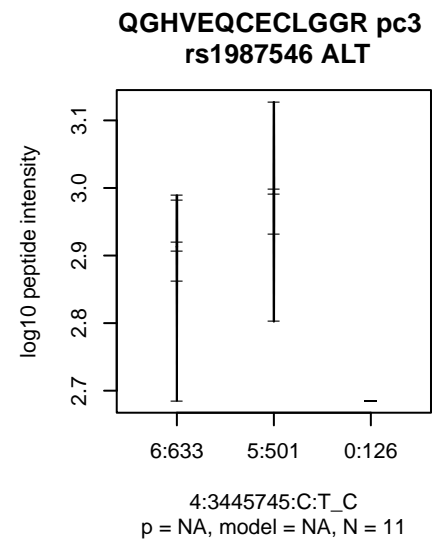

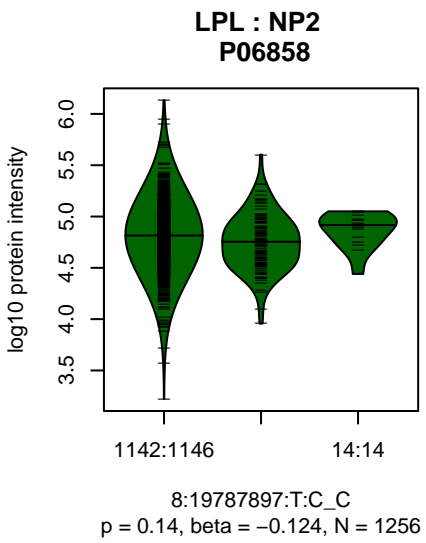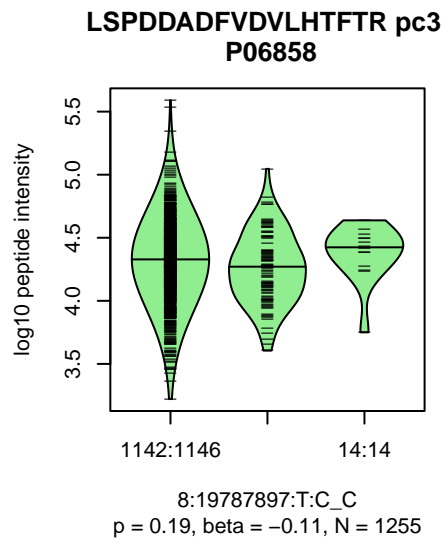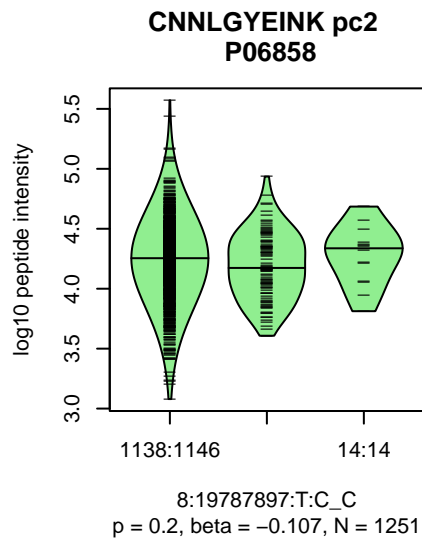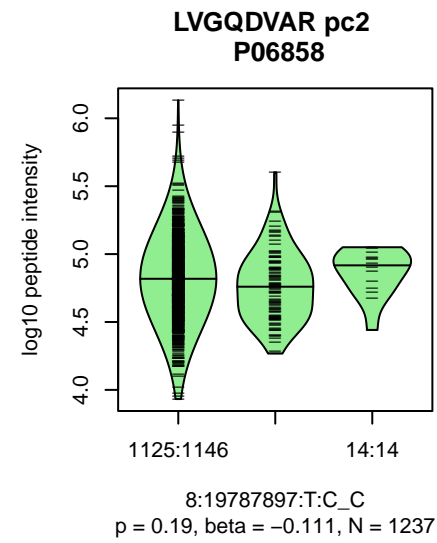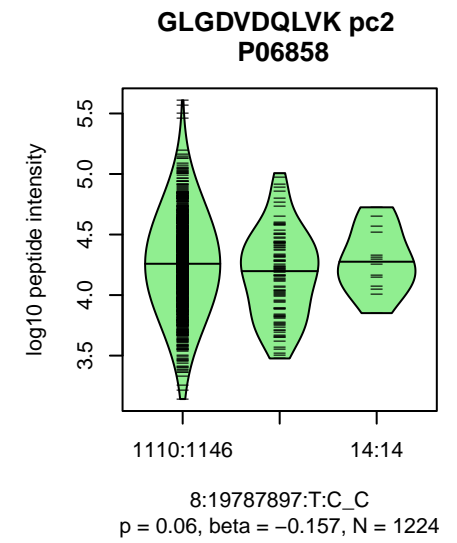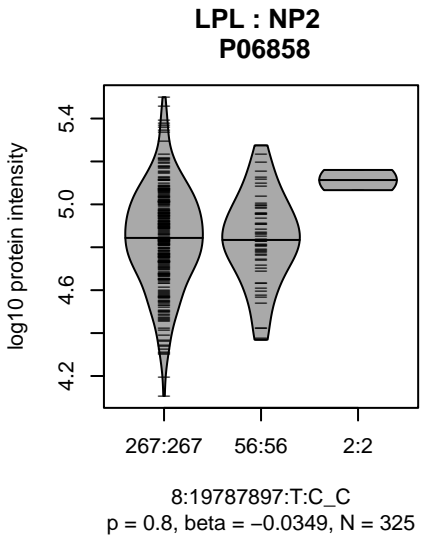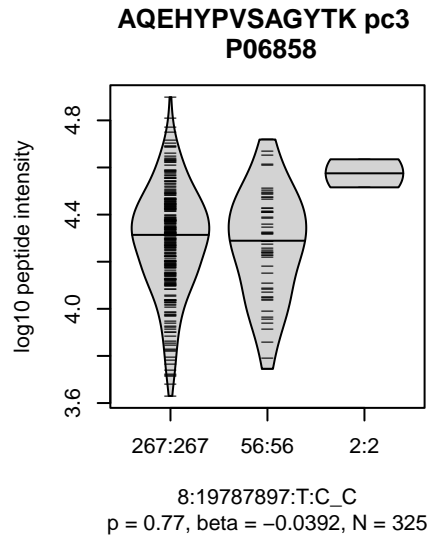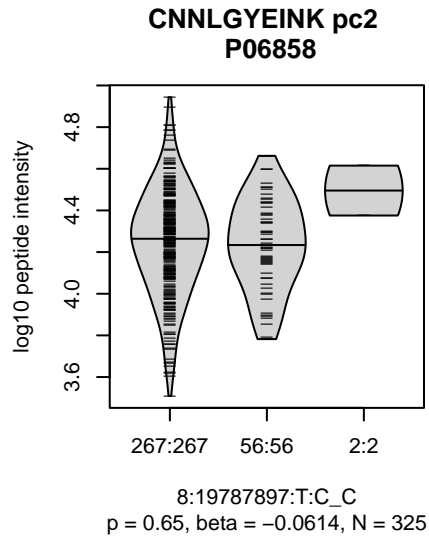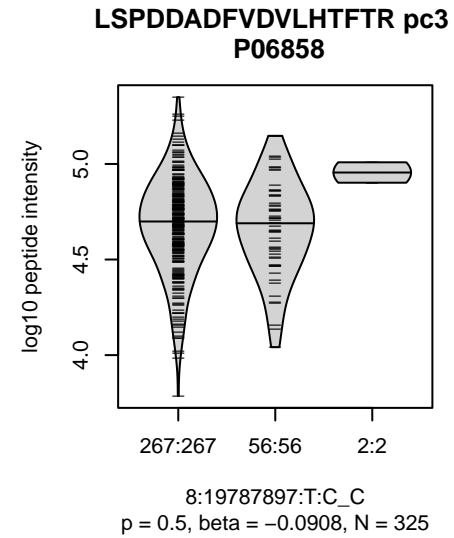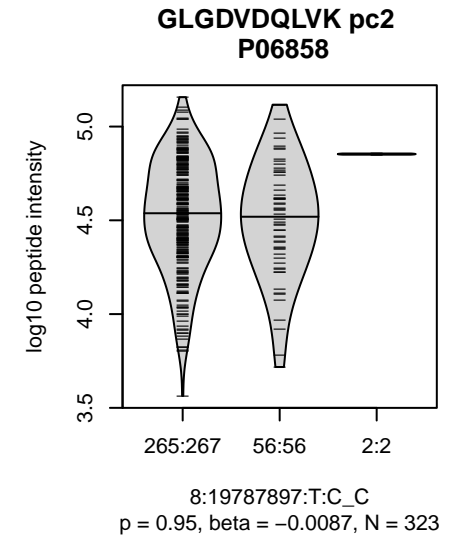

Assay Target: LPL  
 Olink UniProt: P06858  
 UKB rsID: rs1801177  
 Proxy rsID: rs3951339  
 UKB SNP: 8:19805708:G:A  
 Proxy SNP: 8:19787897:T:C  
 UKB log10(p): 1170.6  
 UKB BETA: -1.491  
 -----\*-----  
 1255:1251:1237:1224:1186:117





**ADAMTS8 : NP5**  
**Q9UP79**

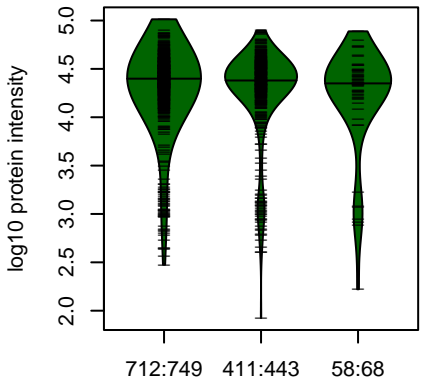

11:130281488:G:A\_G  
 $p = 0.088$ ,  $\beta = -0.084$ ,  $N = 1181$

**YSGSIATLER pc2**  
**Q9UP79**

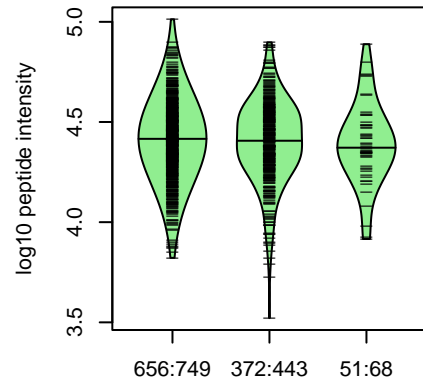

11:130281488:G:A\_G  
 $p = 0.24$ ,  $\beta = -0.0604$ ,  $N = 1079$

**SHPGVQNDGNYLALK pc3**  
**Q9UP79**

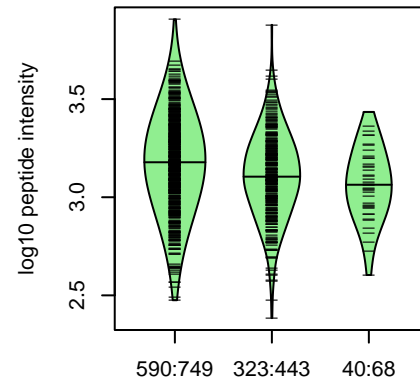

11:130281488:G:A\_G  
 $p = 5.1e-06$ ,  $\beta = -0.255$ ,  $N = 953$

**MALYQLDQQCR pc2**  
**Q9UP79**

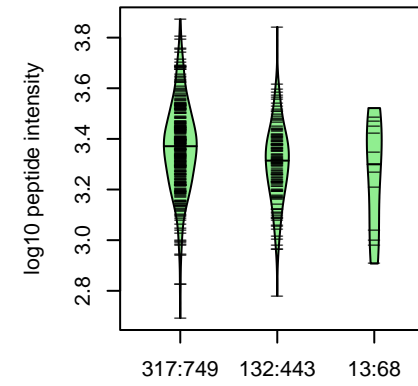

11:130281488:G:A\_G  
 $p = 0.00011$ ,  $\beta = -0.333$ ,  $N = 462$

**GPEWEVETGEGQR pc2**  
**Q9UP79**

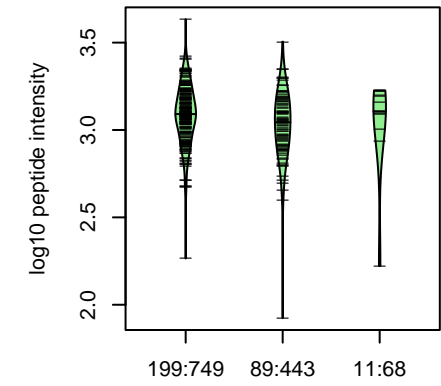

11:130281488:G:A\_G  
 $p = 0.087$ ,  $\beta = -0.176$ ,  $N = 299$

**LAPDDSFLAPEFK pc2**  
**rs7927048 REF**

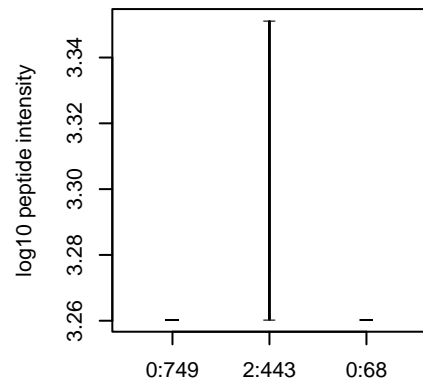

11:130281488:G:A\_G  
 $p = NA$ ,  $\text{model} = NA$ ,  $N = 2$

Assay Target: ADAMTS8  
Olink UniProt: Q9UP79  
UKB rsID: rs2131535  
Proxy rsID: rs2131535  
UKB SNP: 11:130281488:G:A  
Proxy SNP: 11:130281488:G:A  
UKB log10(p): 1117.7  
UKB BETA: 0.494  
-.\*.\*-.\*  
1079:953:462:299:270





**MMP1 : NP1  
P03956**

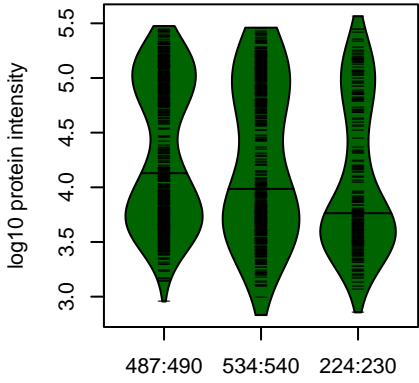

11:102697731:G:A\_A  
p = 0.00033, beta = -0.139, N = 1245

**SQNPVQPIGPQTPK pc2  
P03956**

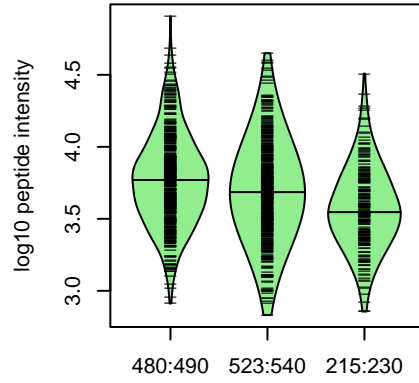

11:102697731:G:A\_A  
p = 1.2e-11, beta = -0.265, N = 1218

**LTFDAITIR pc2  
P03956**

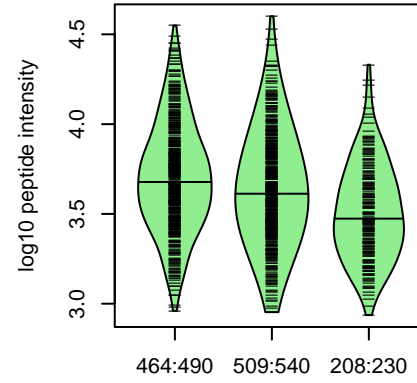

11:102697731:G:A\_A  
p = 2.1e-12, beta = -0.279, N = 1181

**TYFFVANK pc2  
P03956**

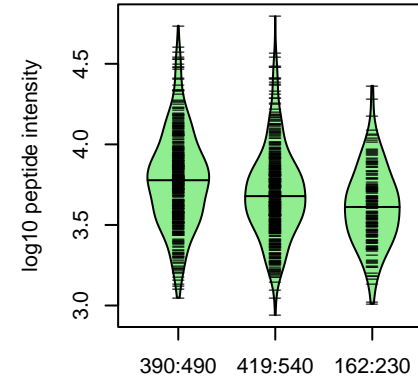

11:102697731:G:A\_A  
p = 5.1e-11, beta = -0.29, N = 971

**MIAHDFPGIGHK pc3  
P03956**

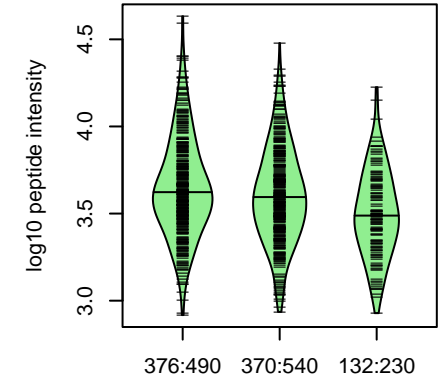

11:102697731:G:A\_A  
p = 3.7e-07, beta = -0.239, N = 878

**MMP1 : NP1  
P03956**

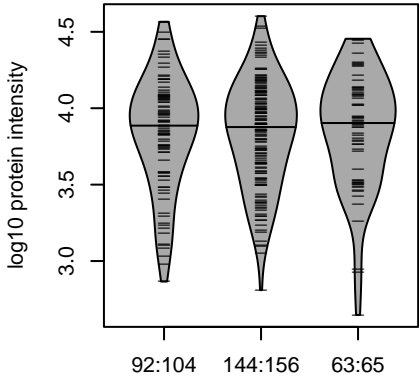

11:102697731:G:A\_G  
p = 0.93, beta = -0.00688, N = 299

**SQNPVQPIGPQTPK pc2  
P03956**

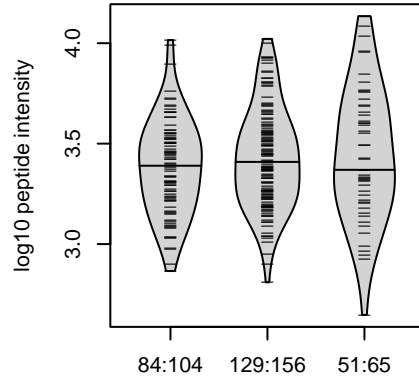

11:102697731:G:A\_G  
p = 0.27, beta = 0.0947, N = 264

**AFQLWSNVTLTFTK pc2  
P03956**

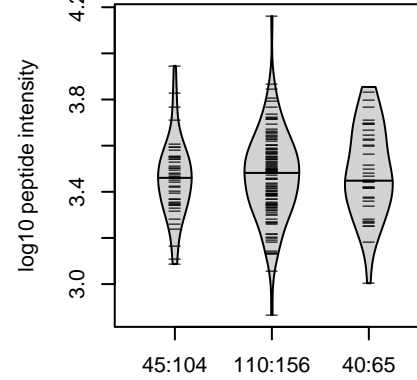

11:102697731:G:A\_G  
p = 0.53, beta = 0.0668, N = 195

**LTFDAITIR pc2  
P03956**

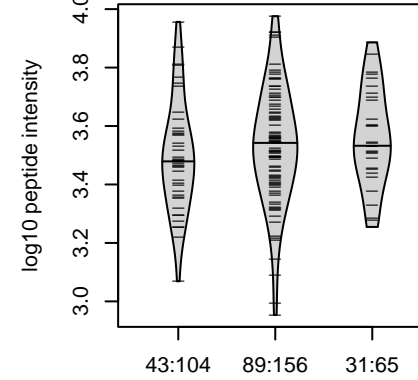

11:102697731:G:A\_G  
p = 0.15, beta = 0.166, N = 163

**TYFFVANK pc2  
P03956**

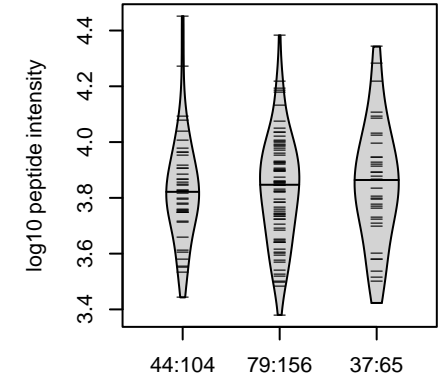

11:102697731:G:A\_G  
p = 0.53, beta = 0.0687, N = 160

Assay Target: MMP1  
Olink UniProt: P03956  
UKB rsID: rs471994  
Proxy rsID: rs471994  
UKB SNP: 11:102697731:G:A  
Proxy SNP: 11:102697731:G:A  
UKB log10(p): 1097.3  
UKB BETA: -0.457  
\*\*\*  
1218:1181:971:878:685:652:639

**BPIFB1 : NP4  
Q8TDL5**

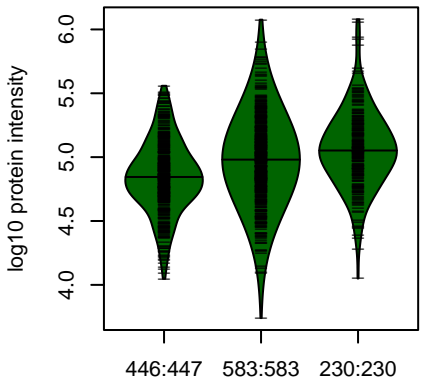

20:31693553:T:C\_T  
p = 7.4e-18, beta = 0.334, N = 1259

**QVMNLLVPSLPNLVK pc2  
Q8TDL5**

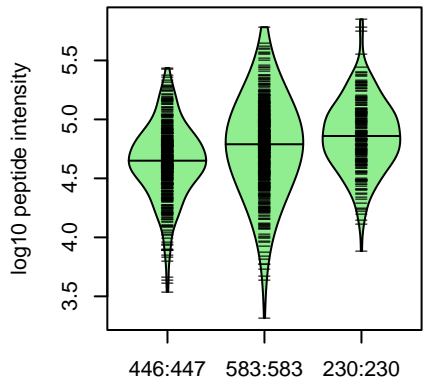

20:31693553:T:C\_T  
p = 6e-15, beta = 0.304, N = 1259

**ALGFEEAESSLTK pc2  
Q8TDL5**

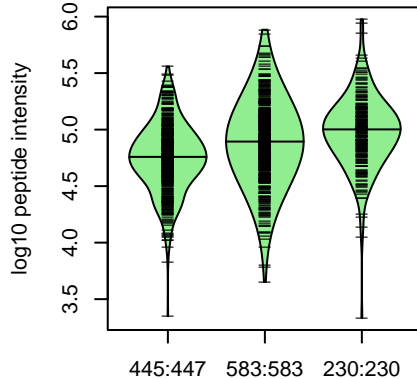

20:31693553:T:C\_T  
p = 4.8e-18, beta = 0.336, N = 1258

**ILTQDTPEFFIDQGHAK pc3  
Q8TDL5**

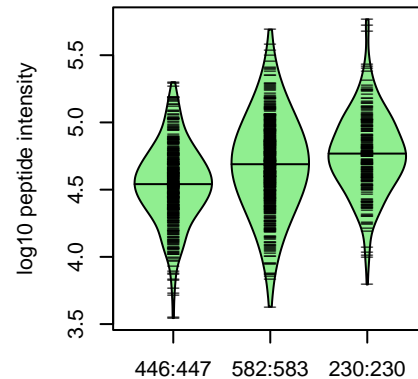

20:31693553:T:C\_T  
p = 2.5e-19, beta = 0.349, N = 1258

**DALVLTPASLWK pc2  
Q8TDL5**

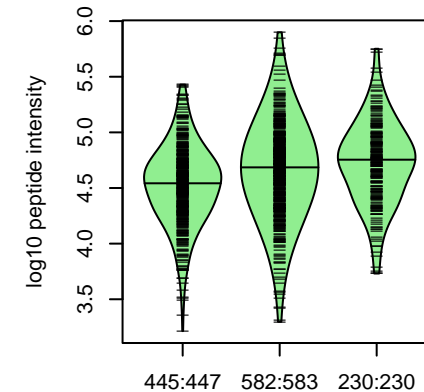

20:31693553:T:C\_T  
p = 4.4e-12, beta = 0.27, N = 1257

**BPIFB1 : NP4  
Q8TDL5**

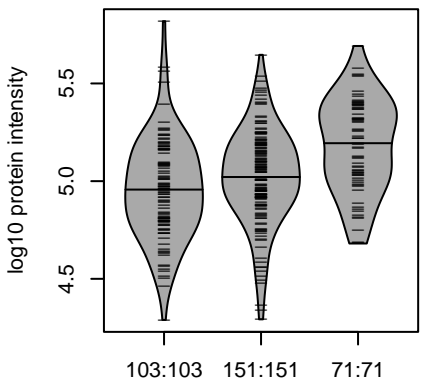

20:31693553:T:C\_T  
p = 1e-06, beta = 0.363, N = 325

**DALVLTPASLWK pc2  
Q8TDL5**

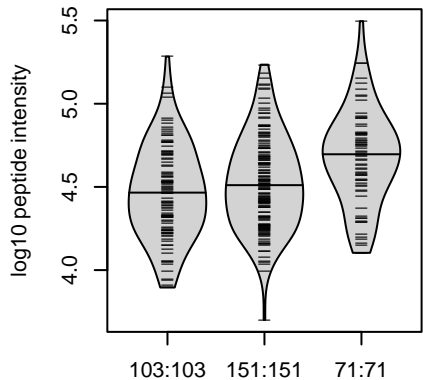

20:31693553:T:C\_T  
p = 2.4e-05, beta = 0.315, N = 325

**EKPAGGIPVLGSLVNTVLK pc3  
Q8TDL5**

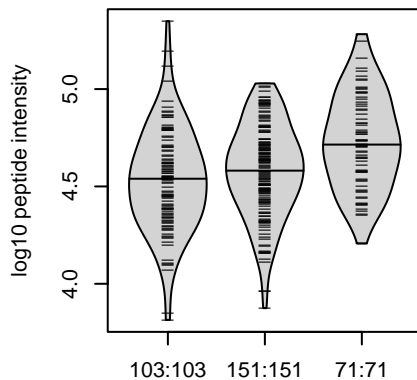

20:31693553:T:C\_T  
p = 2.8e-05, beta = 0.312, N = 325

**ILTQDTPEFFIDQGHAK pc3  
Q8TDL5**

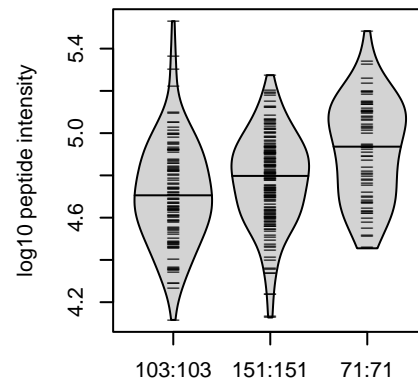

20:31693553:T:C\_T  
p = 2.1e-06, beta = 0.353, N = 325

**LSFLVNALAK pc2  
Q8TDL5**

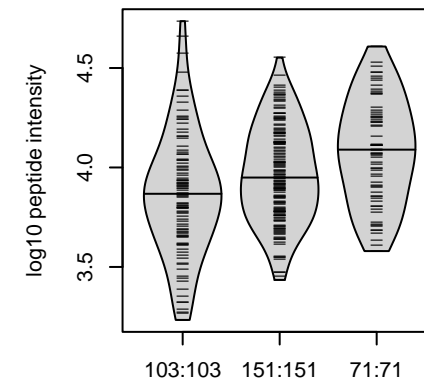

20:31693553:T:C\_T  
p = 1.1e-05, beta = 0.327, N = 325

**PAGGIPVLGSLVNTVLKHHIWLK pc4  
rs1078761 REF**

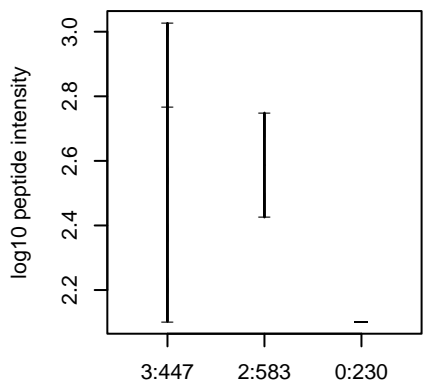

20:31693553:T:C\_T  
p = NA, model = NA, N = 5

Assay Target: BPIFB1  
Olink UniProt: Q8TDL5  
UKB rsID: rs2424957  
Proxy rsID: rs2424957  
UKB SNP: 20:31693553:T:C  
Proxy SNP: 20:31693553:T:C  
UKB log10(p): 1058.1  
UKB BETA: -0.418  
\*\*\*\*\*  
1259:1258:1258:1257:1257:125

**NOMO1 : NP1  
Q15155**

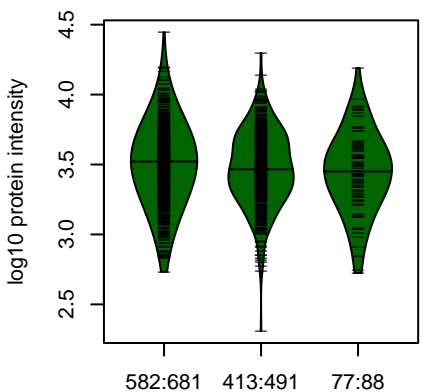

16:16294465:T:C\_T  
p = 0.11, beta = -0.0785, N = 1072

**GQPLGPAGVQVSLR pc2  
A0A7I2V4T6;A0A7I2V686;A0A7I2V6B0;J3KNA0A7I2V4T6;A0A7I2V686;A0A7I2V6B0;J3KN36;P6I2V4T6;A0A7I2V6B0;J3KN36;P69849;**

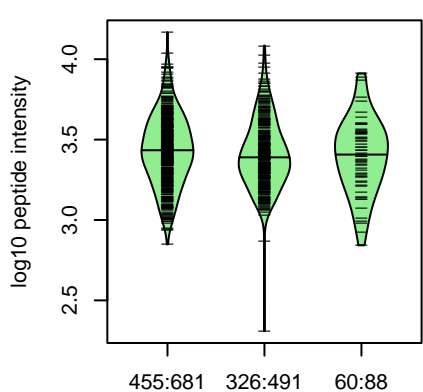

16:16294465:T:C\_T  
p = 0.28, beta = -0.0586, N = 841

**FLLFSSLVTK pc2**

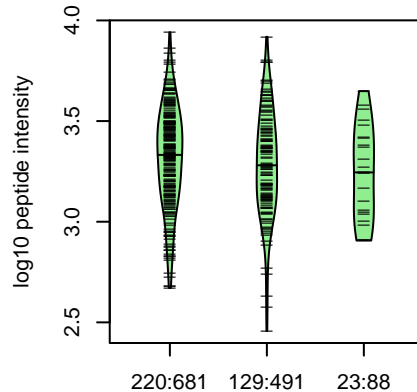

16:16294465:T:C\_T  
p = 0.13, beta = -0.128, N = 372

**VQVMVPEAETR pc2**

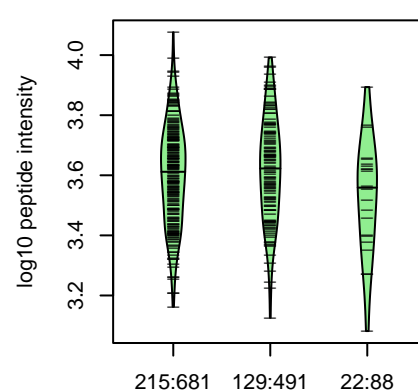

16:16294465:T:C\_T  
p = 0.66, beta = -0.0369, N = 366

**SQYDYILPQVSFTAVGYHK pc3**

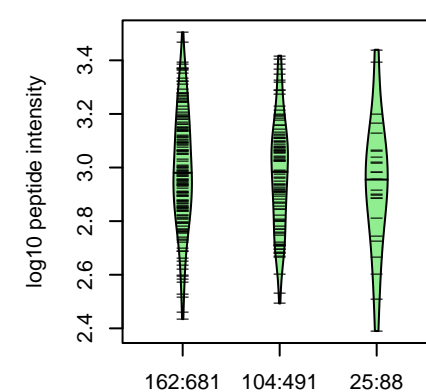

16:16294465:T:C\_T  
p = 0.61, beta = -0.0452, N = 291

**NOMO1 : NP1  
Q15155**

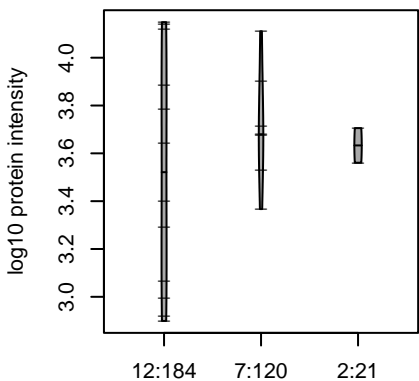

16:16294465:T:C\_T  
p = 0.87, beta = 0.049, N = 21

Assay Target: NOMO1  
Olink UniProt: Q15155  
UKB rsID: rs3891245  
Proxy rsID: rs7184653  
UKB SNP: 16:16348287:T:G  
Proxy SNP: 16:16294465:T:C  
UKB log10(p): 1051.8  
UKB BETA: -0.503  
-----  
841:372:366:291:252:244:216:1









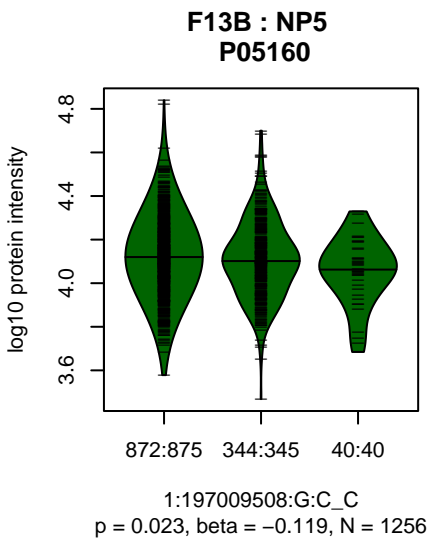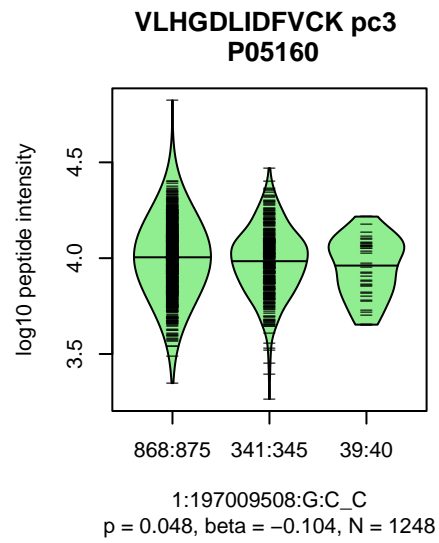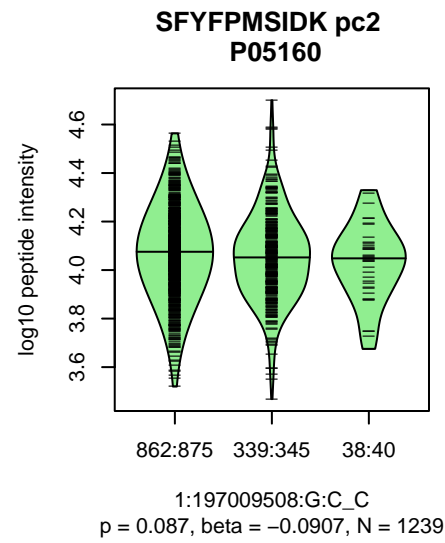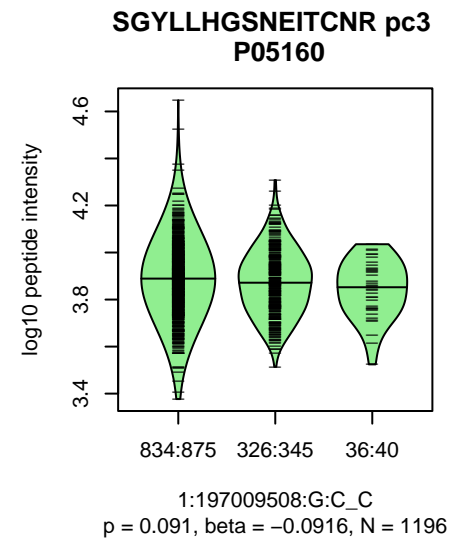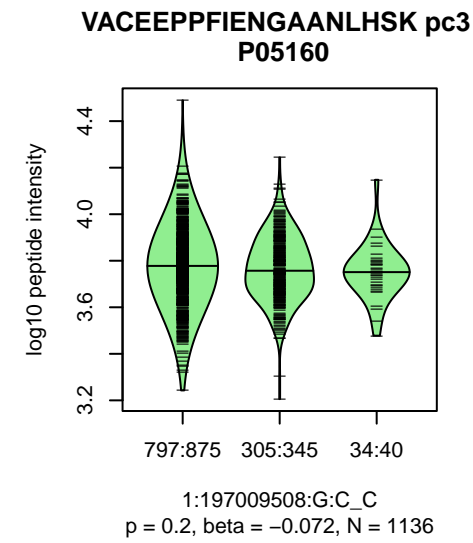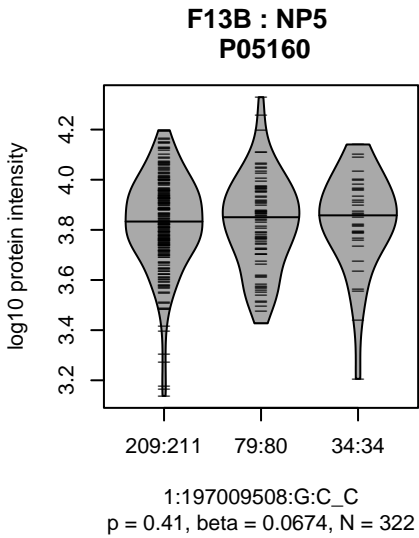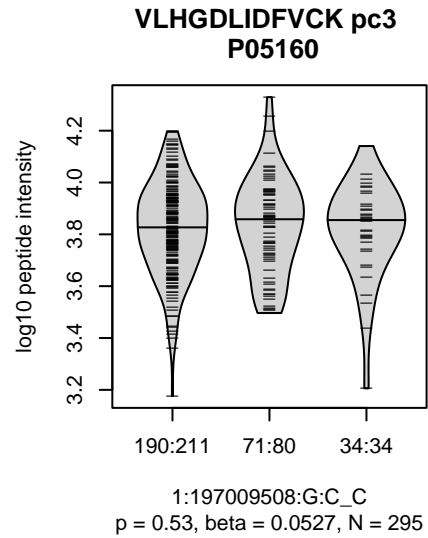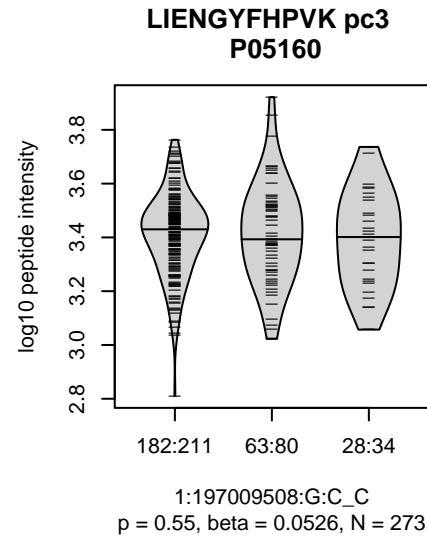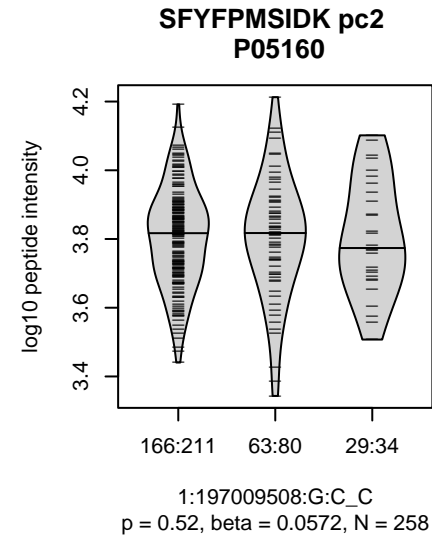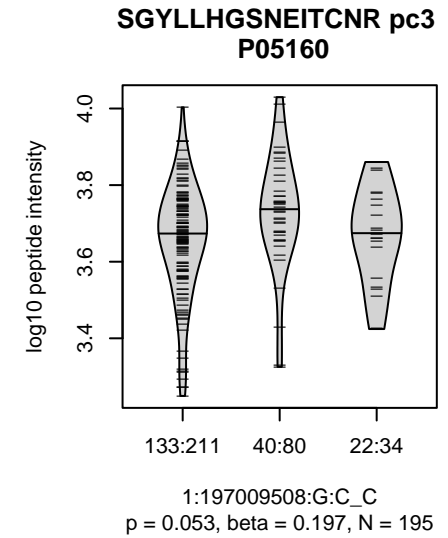

**IQENMHYGCASGYK pc3**  
**rs6003 ALT**

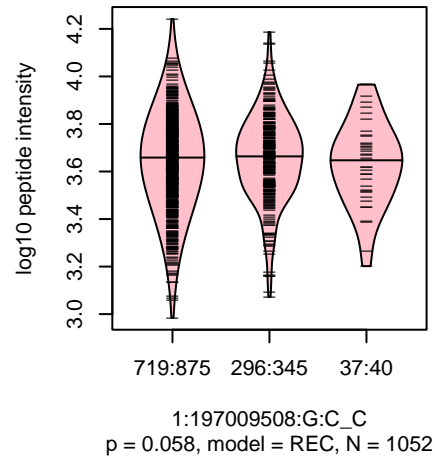

Assay Target: F13B  
Olink UniProt: P05160  
UKB rsID: rs12134960  
Proxy rsID: rs12134960  
UKB SNP: 1:197009508:G:C  
Proxy SNP: 1:197009508:G:C  
UKB log<sub>10</sub>(p): 971.6  
UKB BETA: -0.545  
-----\*

1248:1239:1196:1136:1086:106

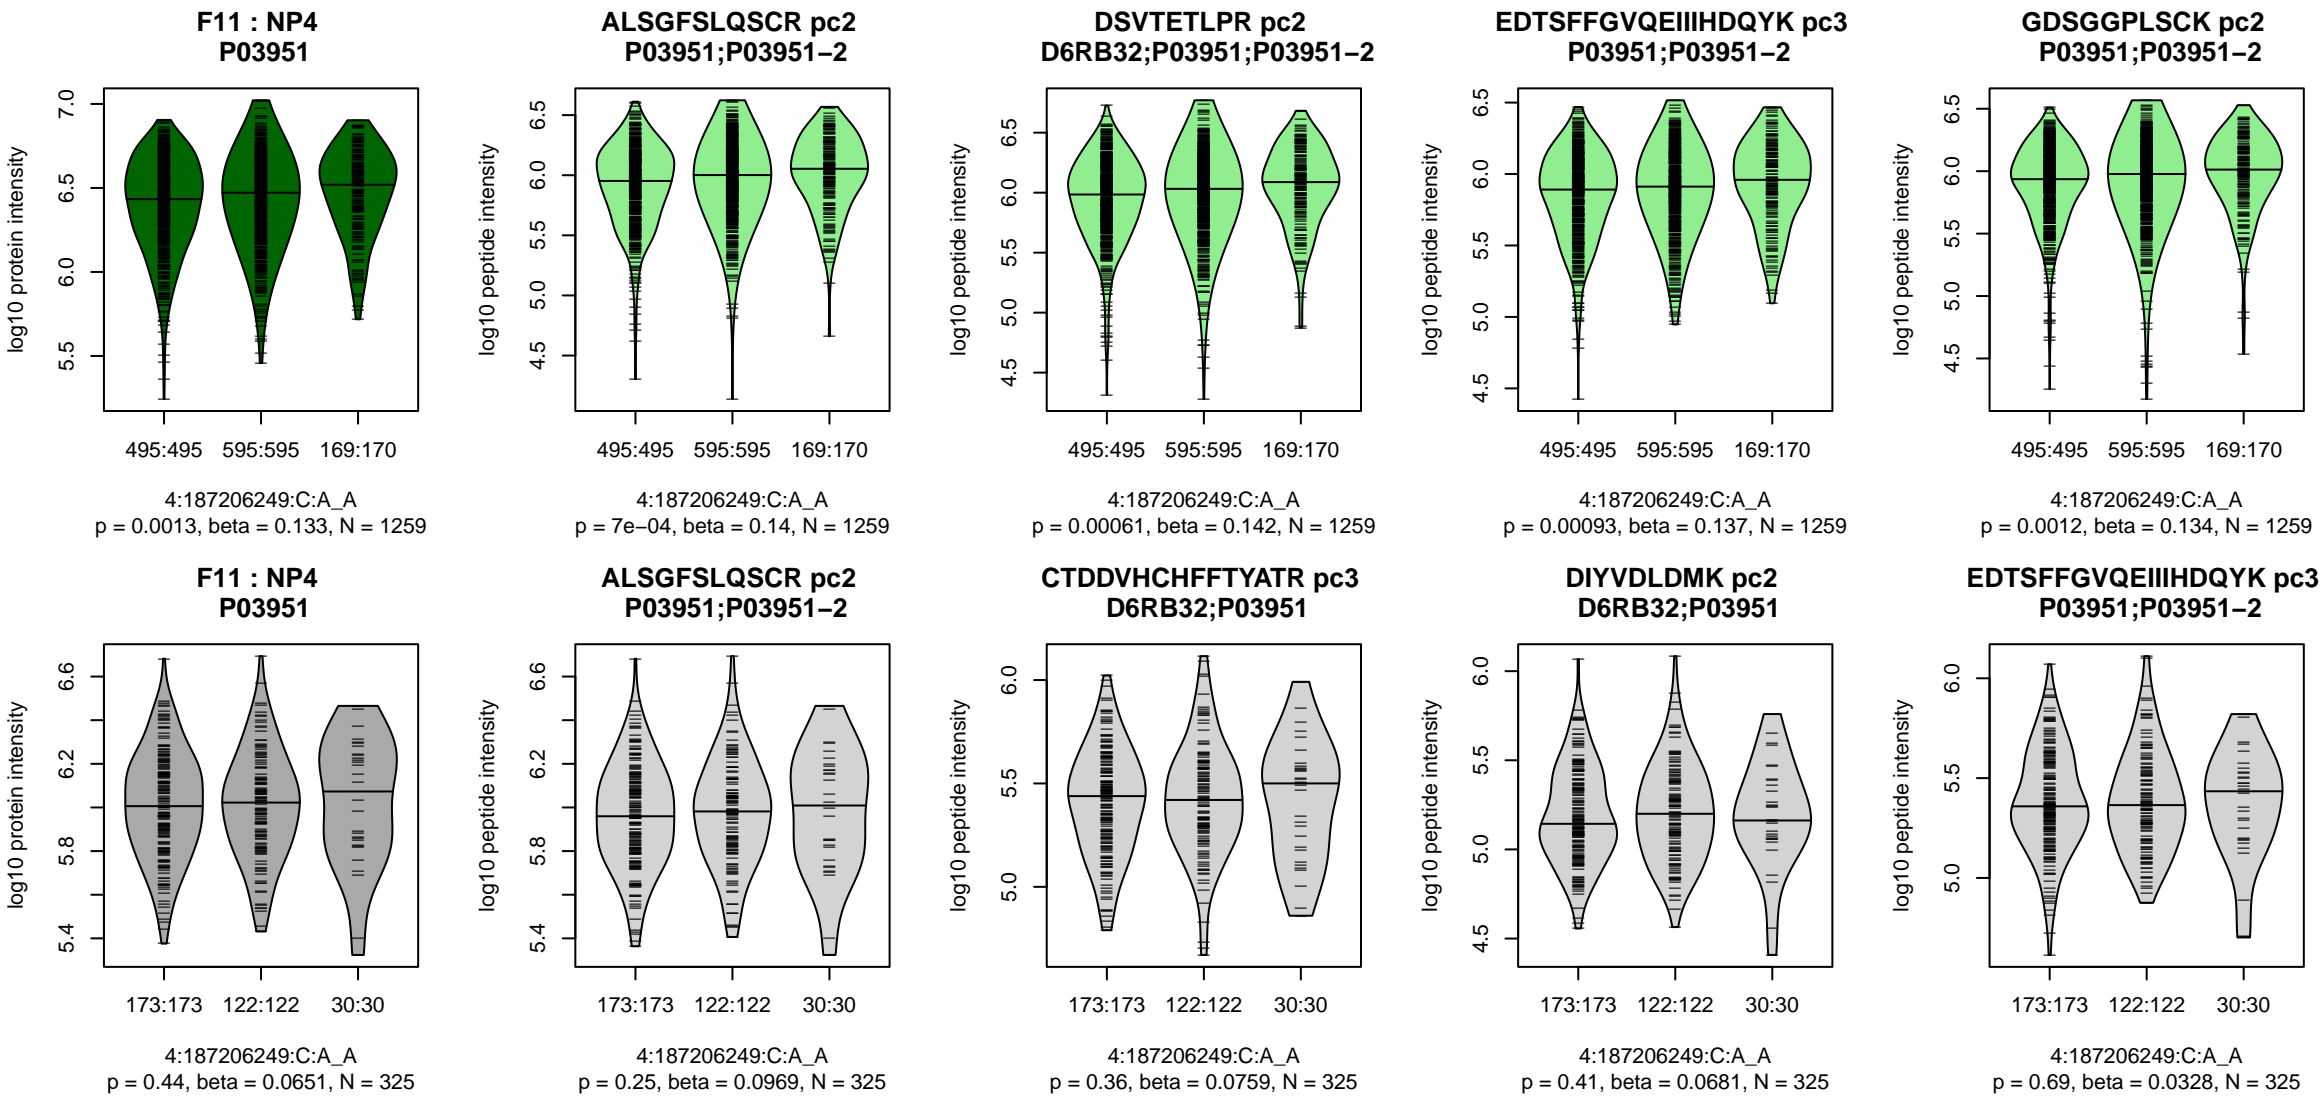

Assay Target: F11  
 Olink UniProt: P03951  
 UKB rsID: rs3756011  
 Proxy rsID: rs3756011  
 UKB SNP: 4:187206249:C:A  
 Proxy SNP: 4:187206249:C:A  
 UKB log<sub>10</sub>(p): 971.5  
 UKB BETA: 0.385  
 \*\*\*\*\*\_\*\*\_\*\_\*\_\*\_\*\_\*  
 1259:1259:1259:1259:1259:125



**STAB2 : NP4**  
**Q8WWQ8**

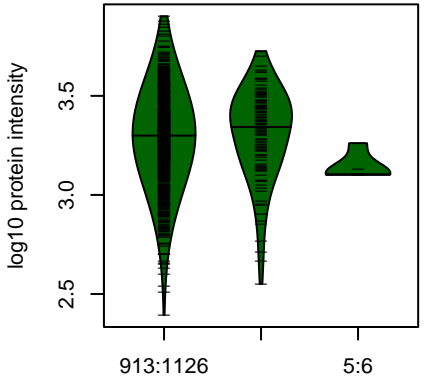

12:104034048:A:G\_G  
 $\rho = 0.99$ ,  $\beta = 0.000934$ ,  $N = 1020$

**LGPFTVLLPTDK pc2**  
**Q8WWQ8**

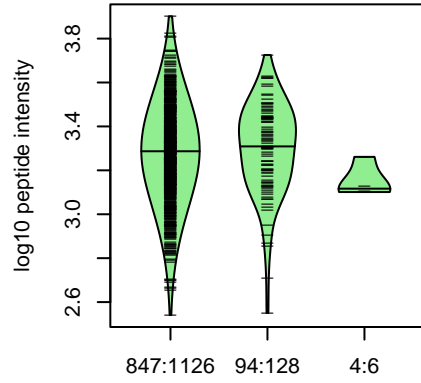

12:104034048:A:G\_G  
 $\rho = 0.68$ ,  $\beta = 0.0414$ ,  $N = 945$

**IIQGDIASNGLLHILDR pc3**  
**Q8WWQ8**

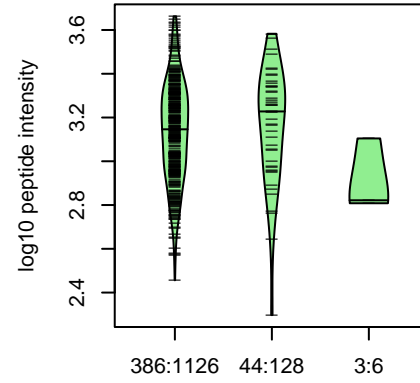

12:104034048:A:G\_G  
 $\rho = 0.83$ ,  $\beta = -0.0307$ ,  $N = 433$

**SFWLSQSNI PALIK pc2**  
**Q8WWQ8**

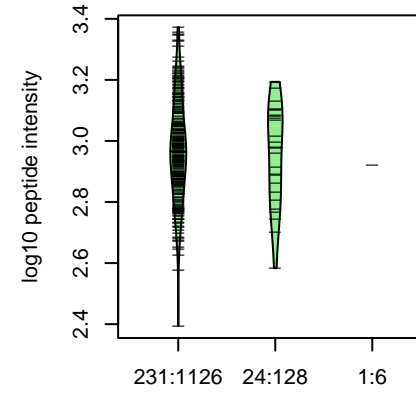

12:104034048:A:G\_G  
 $\rho = 0.34$ ,  $\beta = -0.186$ ,  $N = 256$

**GFNVNELLVDNK pc2**  
**Q8WWQ8**

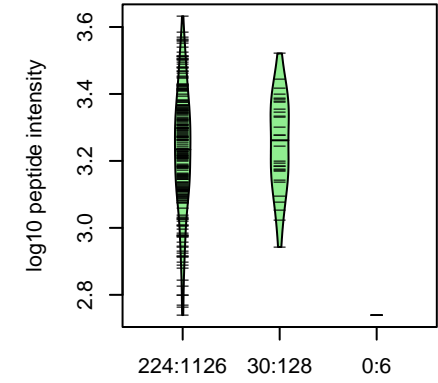

12:104034048:A:G\_G  
 $\rho = 0.58$ ,  $\beta = 0.106$ ,  $N = 254$

Assay Target: STAB2  
Olink UniProt: Q8WWQ8  
UKB rsID: rs115840458  
Proxy rsID: rs115840458  
UKB SNP: 12:104034048:A:G  
Proxy SNP: 12:104034048:A:G  
UKB log10(p): 952.3  
UKB BETA: 0.786  
- - - - -  
945:433:256:254:226:219:145:7

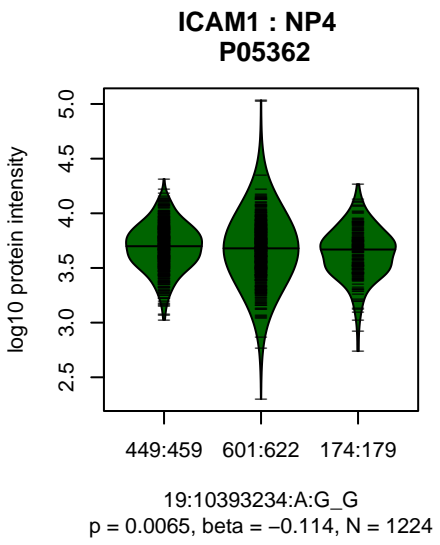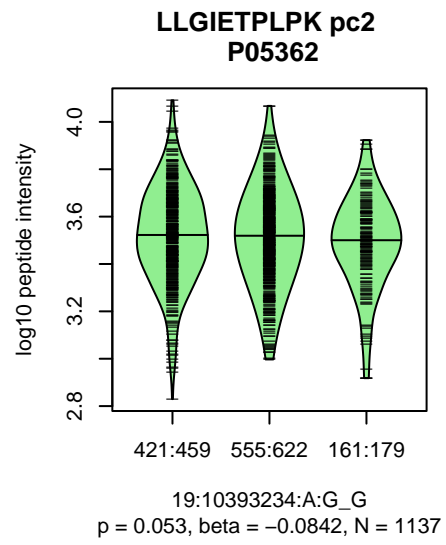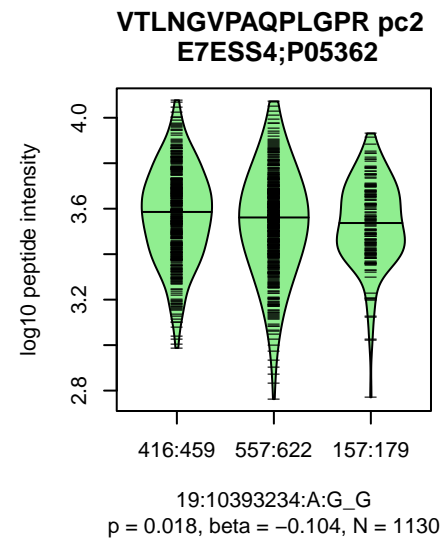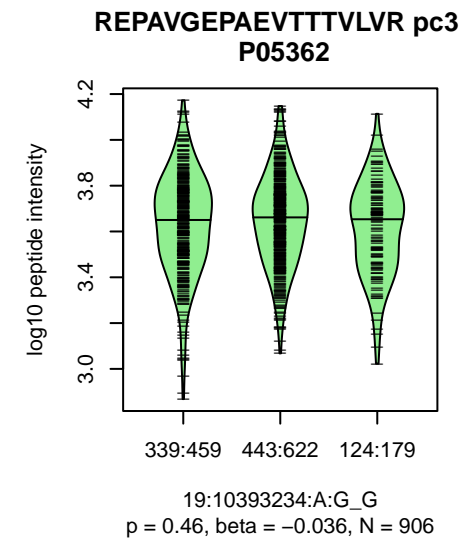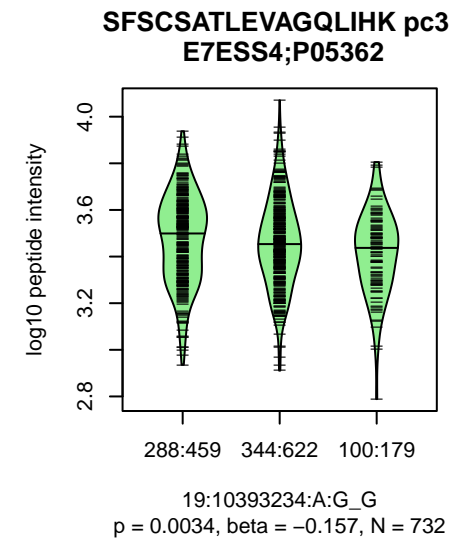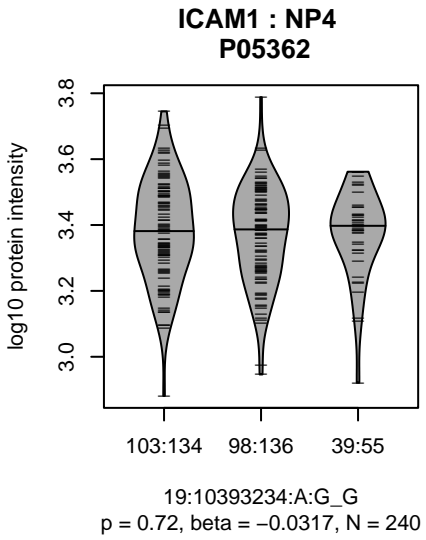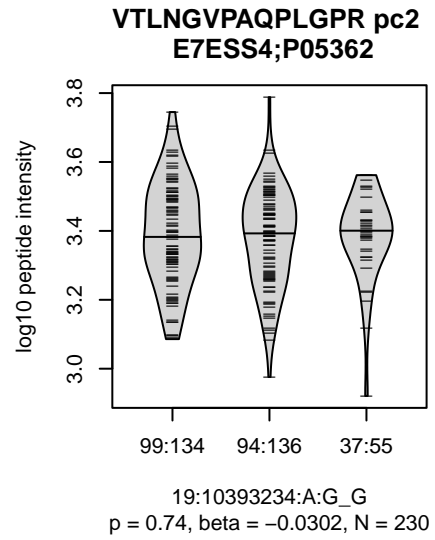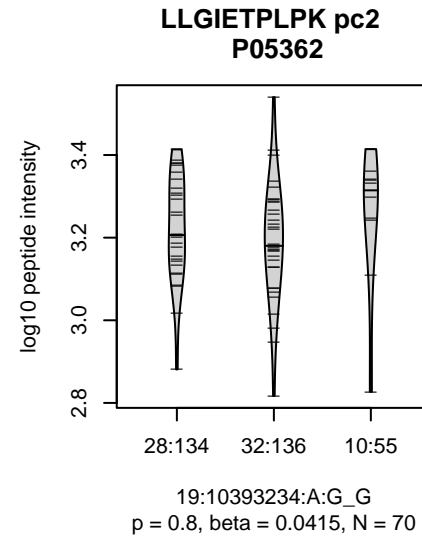

Assay Target: ICAM1  
 Olink UniProt: P05362  
 UKB rsID: rs5030379  
 Proxy rsID: rs5030377  
 UKB SNP: 19:10393605:C:CTT  
 Proxy SNP: 19:10393234:A:G  
 UKB log10(p): 945.1  
 UKB BETA: 0.413  
 ---\*---  
 1137:1130:906:732:664:564







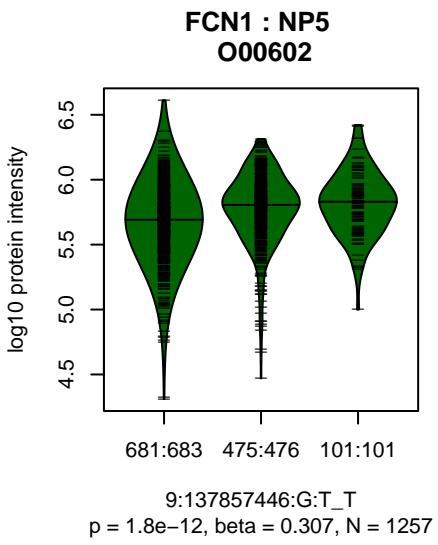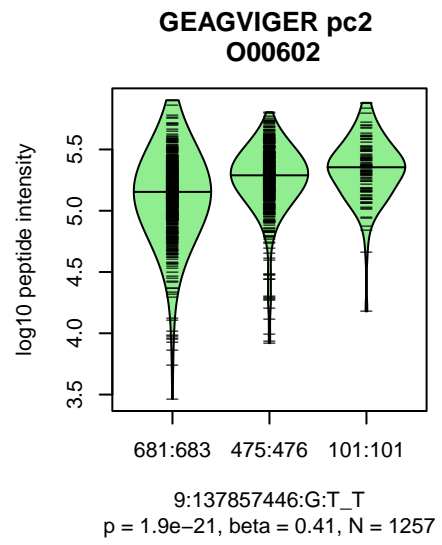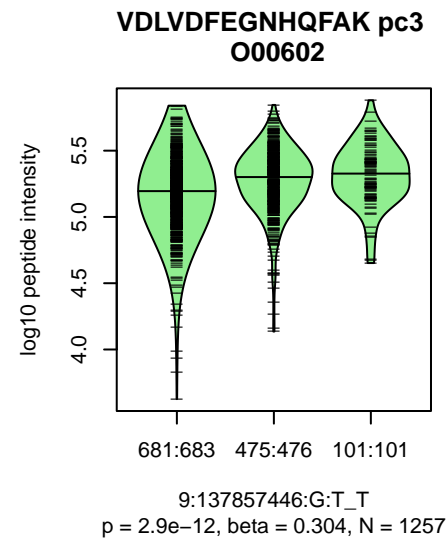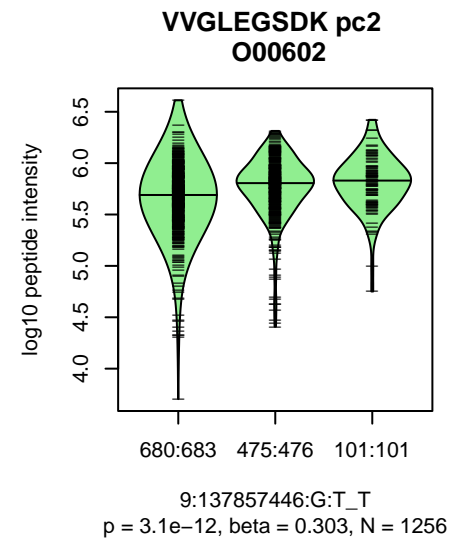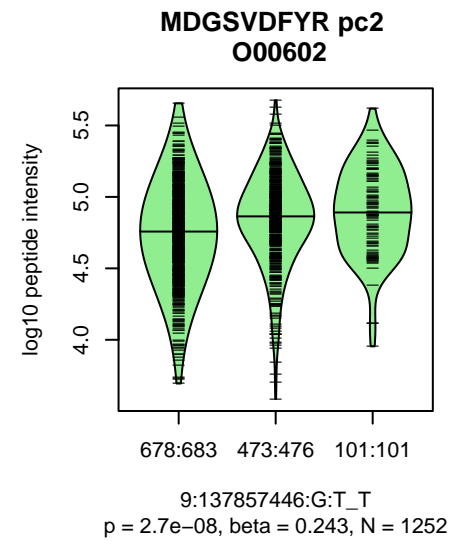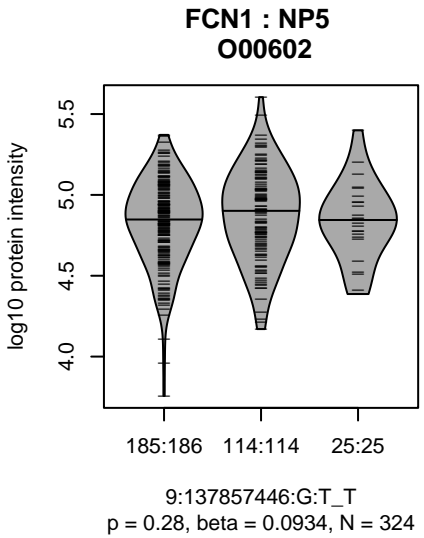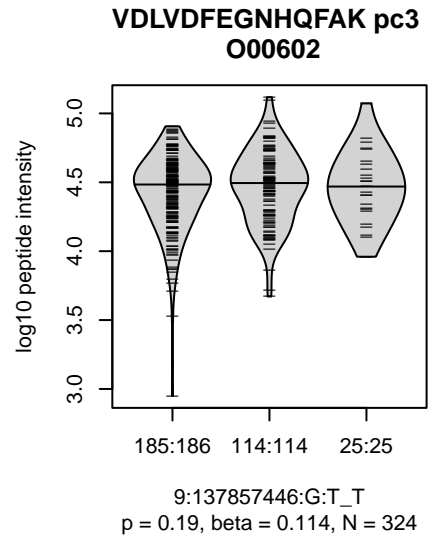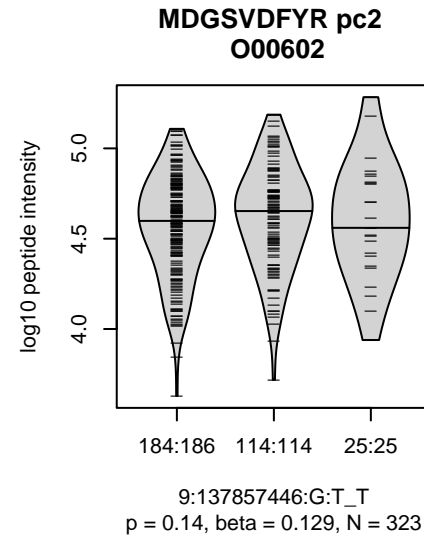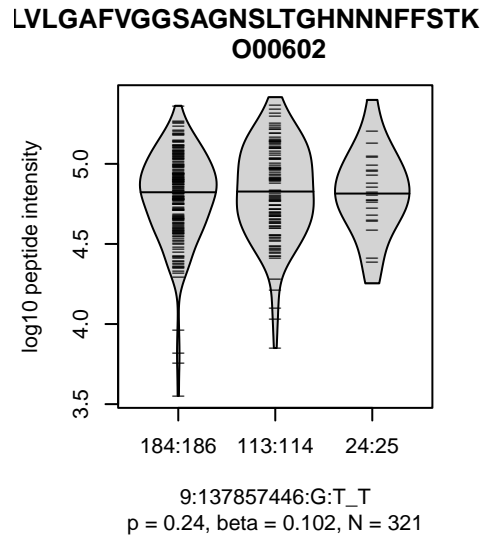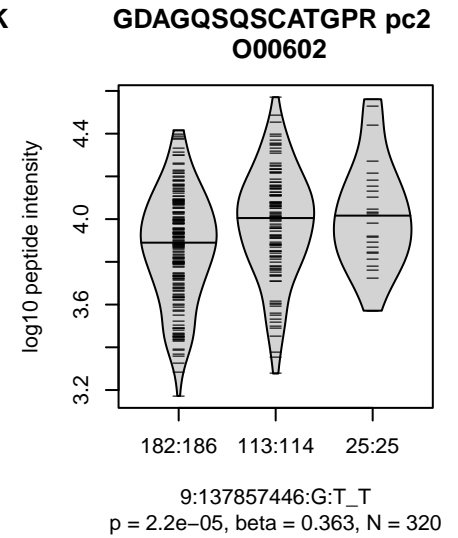

Assay Target: FCN1  
 Olink UniProt: O00602  
 UKB rsID: rs11103604  
 Proxy rsID: rs11103604  
 UKB SNP: 9:137857446:G:T  
 Proxy SNP: 9:137857446:G:T  
 UKB log10(p): 904.4  
 UKB BETA: 0.438  
 .....:NA:NA  
 1257:1257:1256:1253:1252:124

**KLK7 : NP3  
P49862**

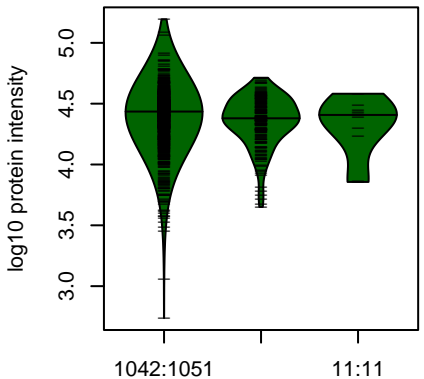

19:51485622:A:G\_A  
p = 0.0057, beta = -0.193, N = 1250

**LISPQDCTK pc2  
P49862-2;P49862**

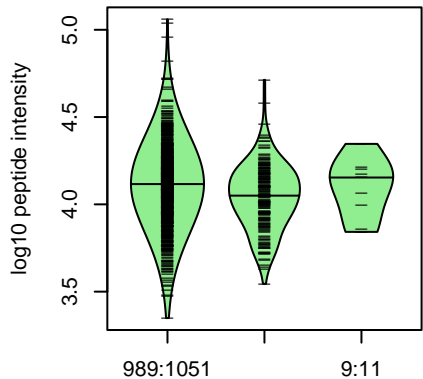

19:51485622:A:G\_A  
p = 0.00015, beta = -0.278, N = 1179

**IIDGAPCAR pc2  
P49862**

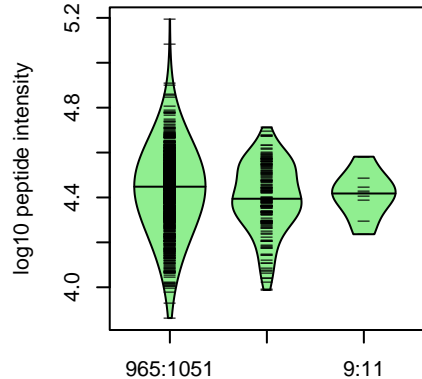

19:51485622:A:G\_A  
p = 0.016, beta = -0.179, N = 1151

**GSHPWQVALLSGNQLHCGGVLVNER  
P49862**

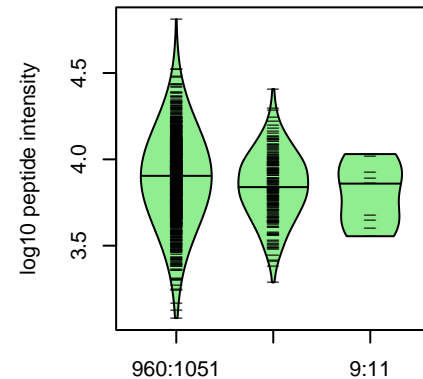

19:51485622:A:G\_A  
p = 0.0024, beta = -0.225, N = 1147

**NACNGDSGGPLVCR pc2  
P49862-2;P49862**

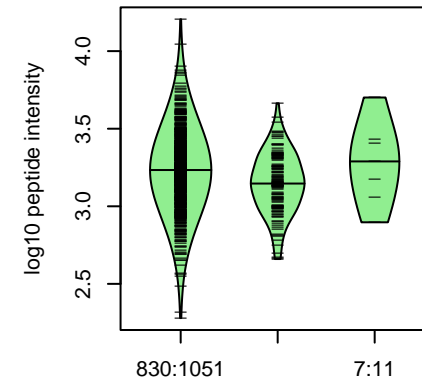

19:51485622:A:G\_A  
p = 0.00023, beta = -0.307, N = 974

**KLK7 : NP3  
P49862**

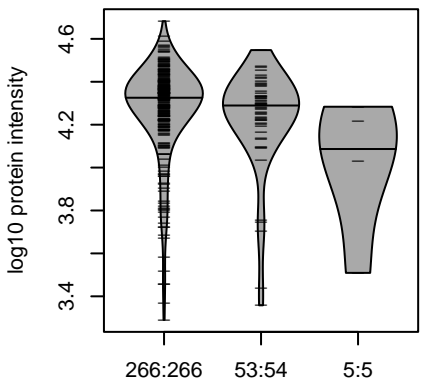

19:51485622:A:G\_A  
p = 0.0027, beta = -0.378, N = 324

**IIDGAPCAR pc2  
P49862**

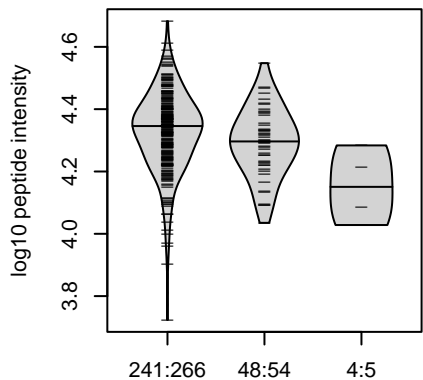

19:51485622:A:G\_A  
p = 0.0034, beta = -0.393, N = 293

**WVLTAHCK pc2  
P49862**

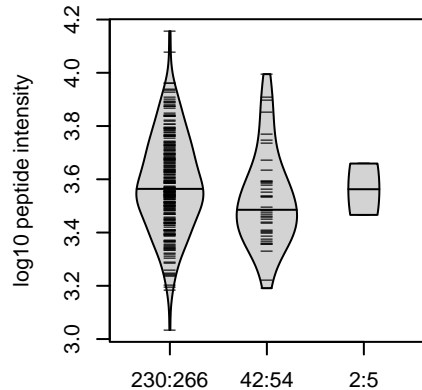

19:51485622:A:G\_A  
p = 0.0078, beta = -0.402, N = 274

**HPGYSTQTHVNDLMLVK pc3  
P49862-2;P49862**

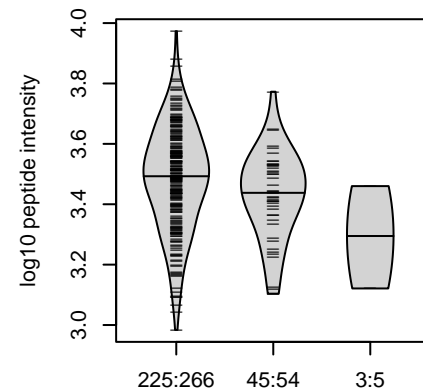

19:51485622:A:G\_A  
p = 0.0034, beta = -0.416, N = 273

**LISPQDCTK pc2  
P49862-2;P49862**

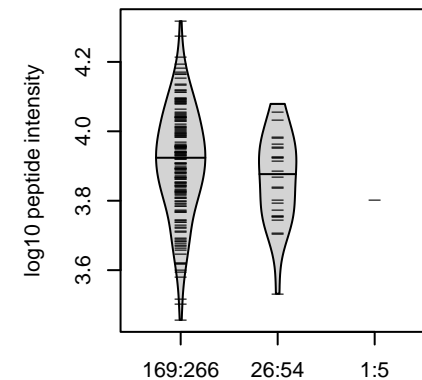

19:51485622:A:G\_A  
p = 0.02, beta = -0.446, N = 196

Assay Target: KLK7  
Olink UniProt: P49862  
UKB rsID: rs2659067  
Proxy rsID: rs2659067  
UKB SNP: 19:51485622:A:G  
Proxy SNP: 19:51485622:A:G  
UKB log10(p): 900.3  
UKB BETA: 0.681  
\*.-.\*.\*.\*.\*.-.-.-.-  
1179:1151:1147:974:918:702:32

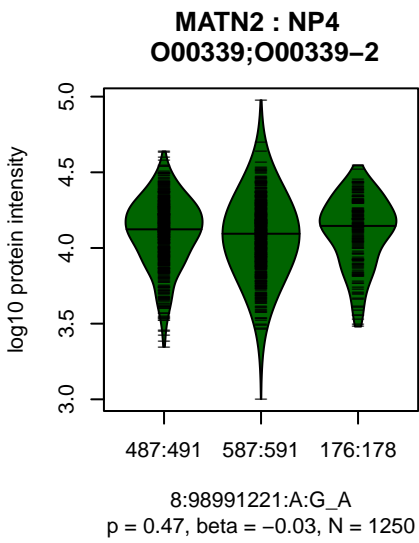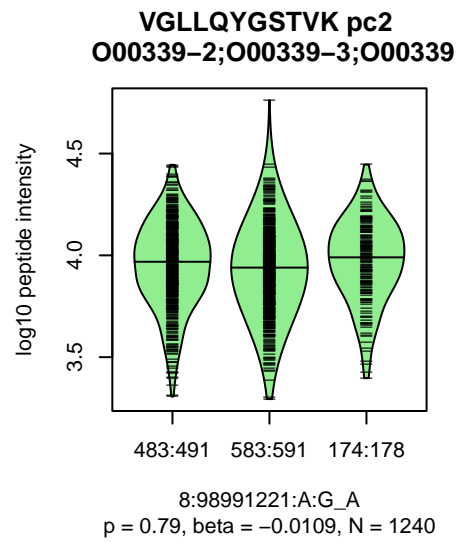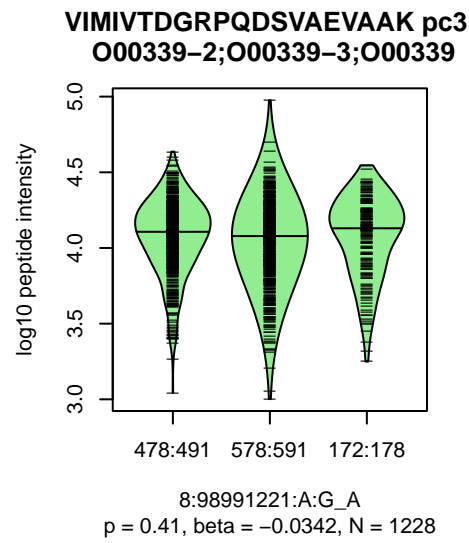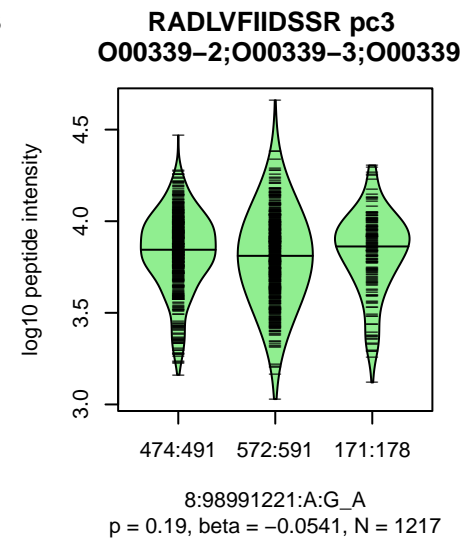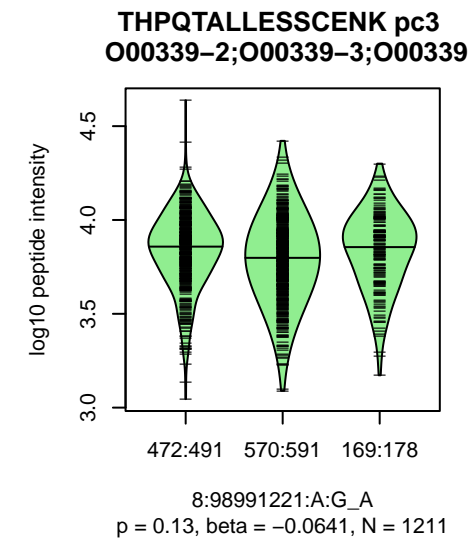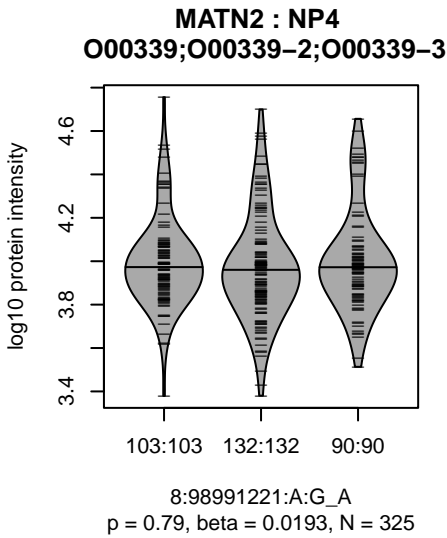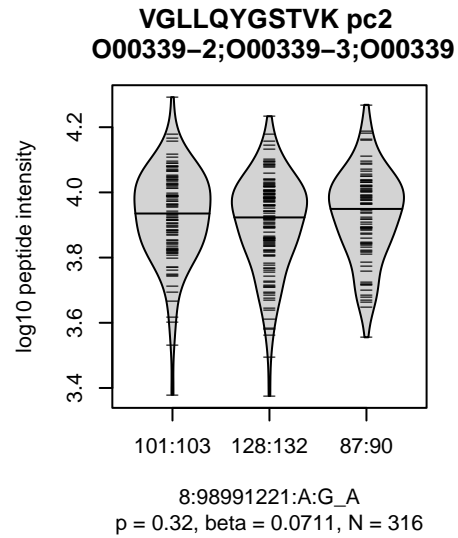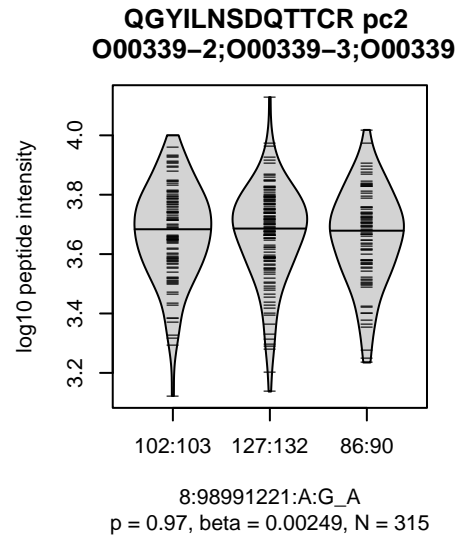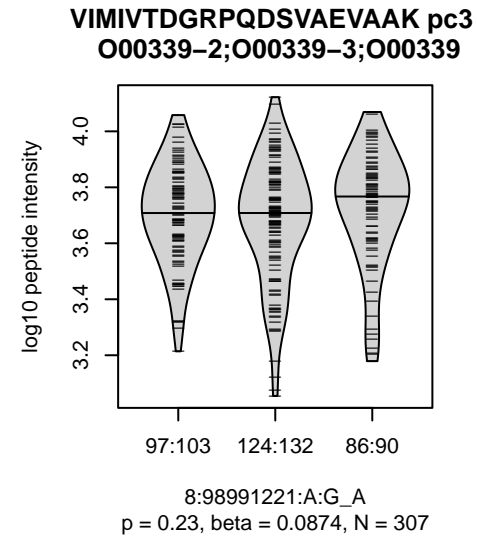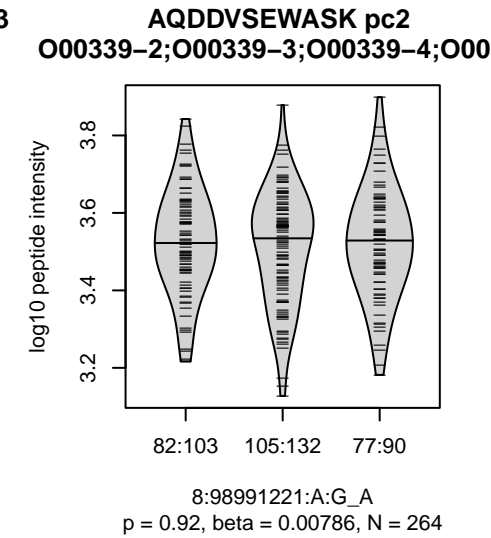

Assay Target: MATN2  
 Olink UniProt: O00339  
 UKB rsID: rs1869609  
 Proxy rsID: rs1869609  
 UKB SNP: 8:98991221:A:G  
 Proxy SNP: 8:98991221:A:G  
 UKB log10(p): 898.5  
 UKB BETA: 0.405  
 -----  
 1240:1228:1217:1211:1205:114

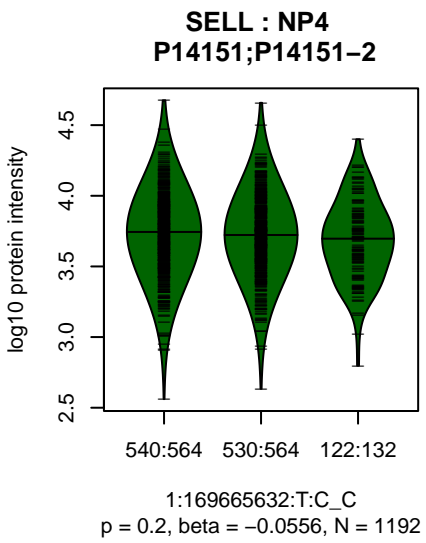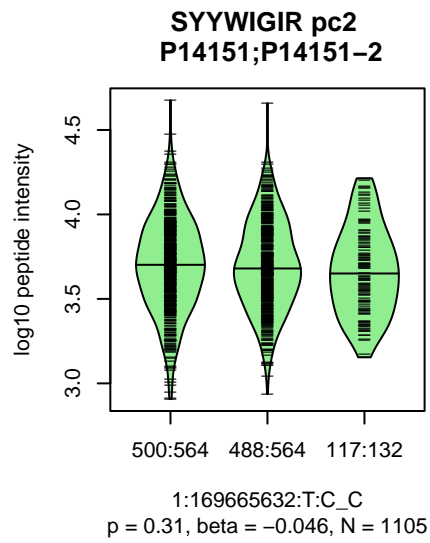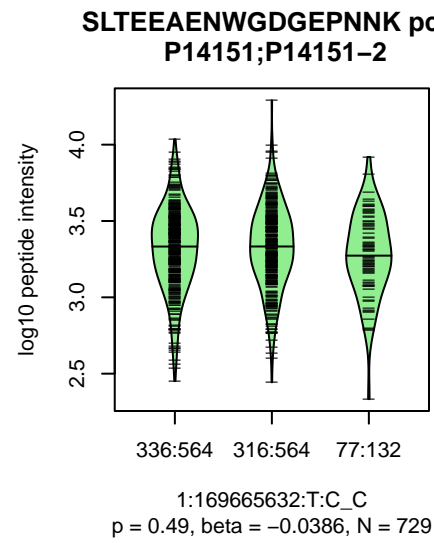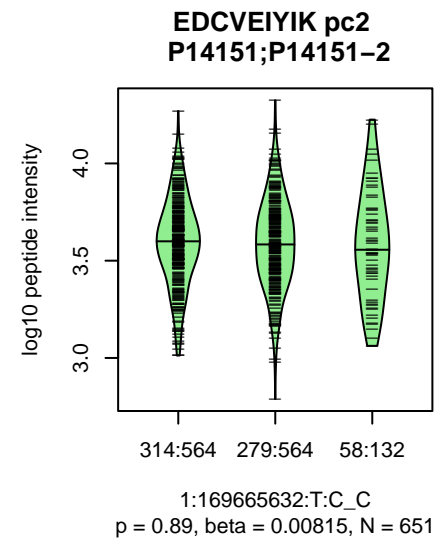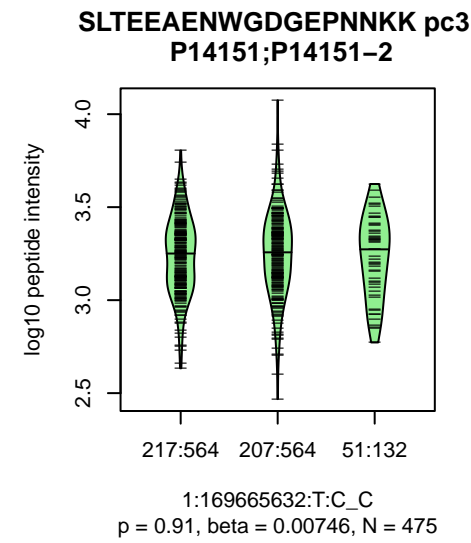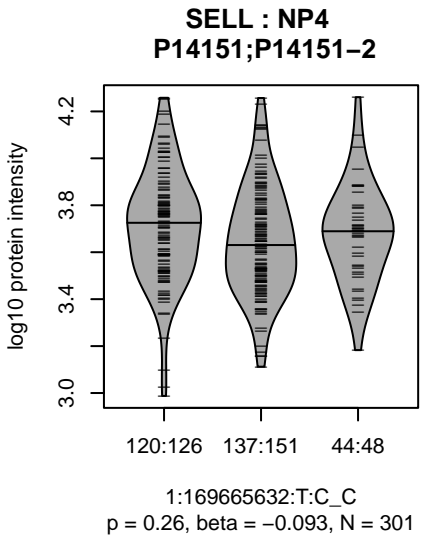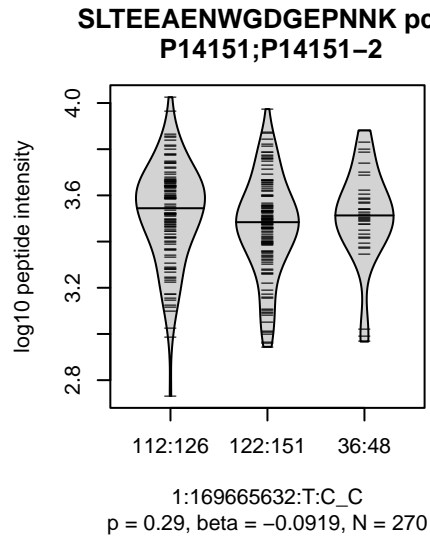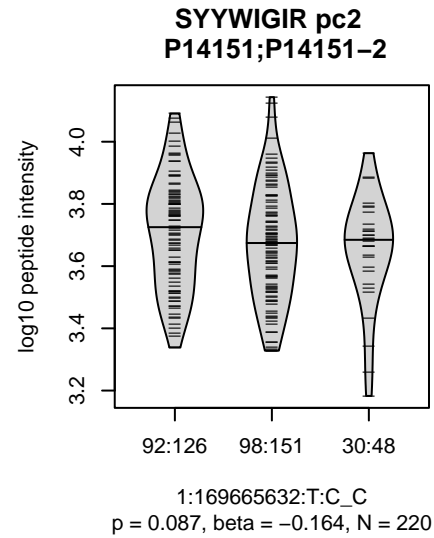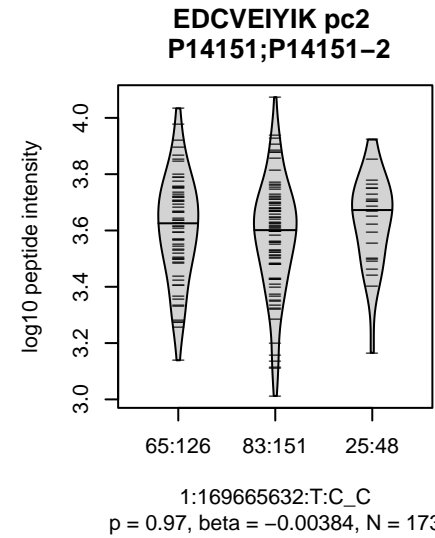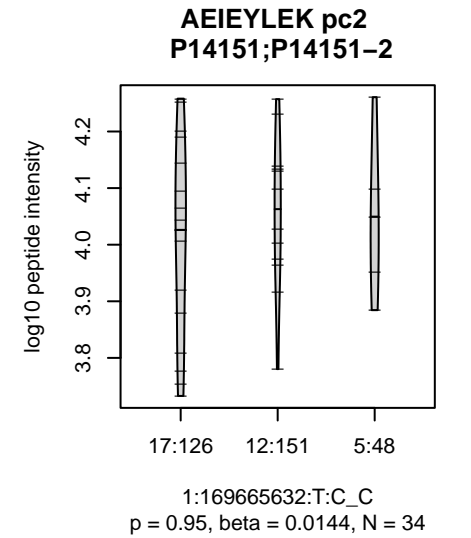

Assay Target: SELL  
 Olink UniProt: P14151  
 UKB rsID: rs2223286  
 Proxy rsID: rs2223286  
 UKB SNP: 1:169665632:T:C  
 Proxy SNP: 1:169665632:T:C  
 UKB log10(p): 888.4  
 UKB BETA: -0.407  
 -:-:-:-:-  
 1105:729:651:475:449

**EBI3\_IL27 : NP4  
Q14213**

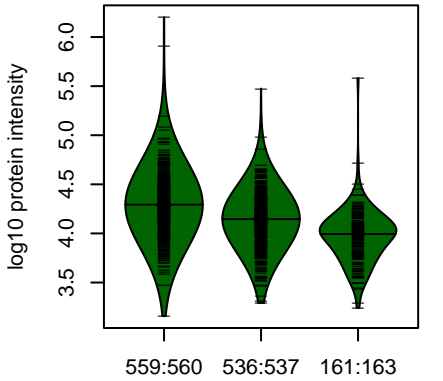

19:4247476:C:T\_T  
p = 7.6e-39, beta = -0.515, N = 1256

**VGPIEATSFILR pc2  
Q14213**

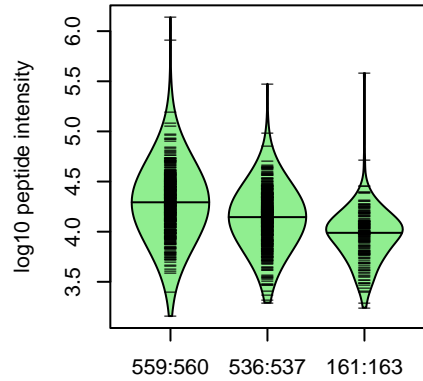

19:4247476:C:T\_T  
p = 5.3e-39, beta = -0.516, N = 1256

**GPPAALTLPK pc2  
Q14213**

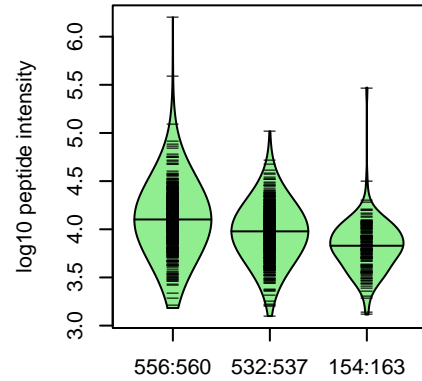

19:4247476:C:T\_T  
p = 1.7e-26, beta = -0.431, N = 1242

**EBI3\_IL27 : NP4  
Q14213**

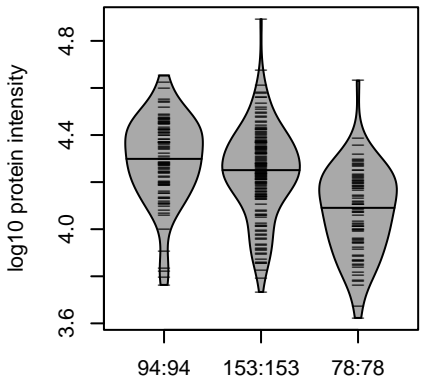

19:4247476:C:T\_T  
p = 7.6e-14, beta = -0.541, N = 325

**VGPIEATSFILR pc2  
Q14213**

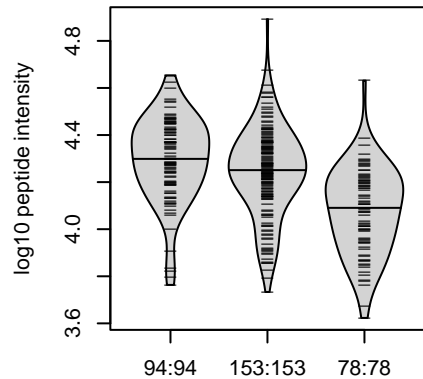

19:4247476:C:T\_T  
p = 8e-14, beta = -0.541, N = 325

**GPPAALTLPK pc2  
Q14213**

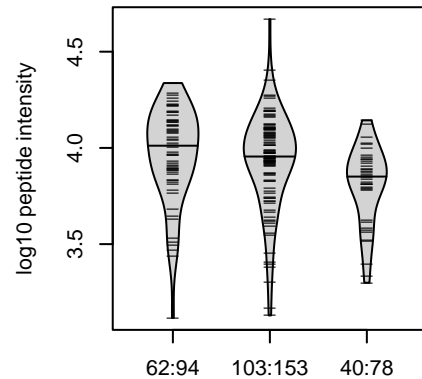

19:4247476:C:T\_T  
p = 0.00098, beta = -0.32, N = 205

Assay Target: EBI3\_IL27  
Olink UniProt: Q14213  
UKB rsID: rs8109160  
Proxy rsID: rs8109160  
UKB SNP: 19:4247476:C:T  
Proxy SNP: 19:4247476:C:T  
UKB log10(p): 876.3  
UKB BETA: -0.401  
\*\*  
1256:1242

**CD55 : NP1  
P08174-5**

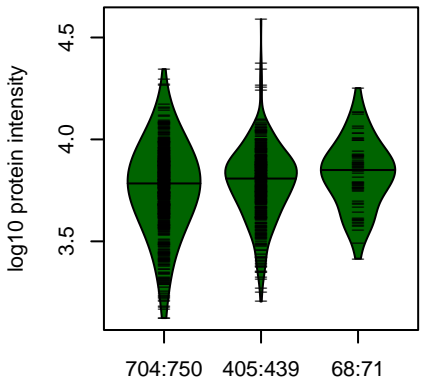

1:207421214:G:A\_A  
p = 0.0016, beta = 0.152, N = 1177

**LTCLQLNK pc2**

AP13;P08174;P08174-2;P08174-3;P0AP13;P08174;P08174-2;P08174-3;P03;B1AP15;P08174;P08174-2;P08174-AP13;P08174;P08174-2;P08174-3;P0

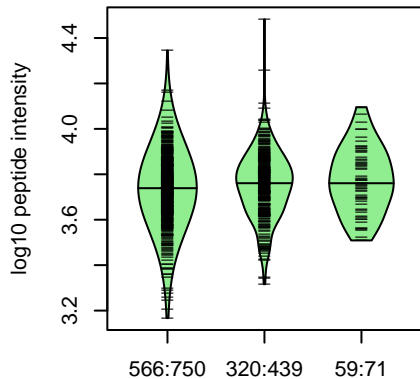

1:207421214:G:A\_A  
p = 0.022, beta = 0.121, N = 945

**WSTAVEFCK pc2**

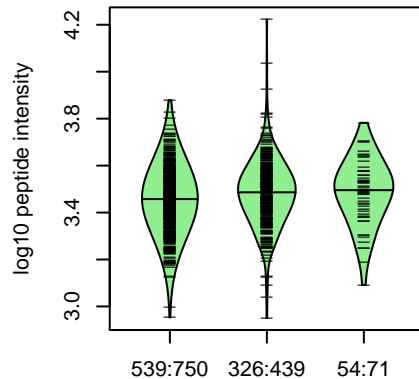

1:207421214:G:A\_A  
p = 0.0044, beta = 0.154, N = 919

**QSVTYACNK pc2**

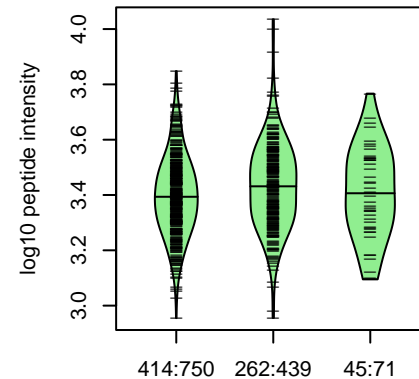

1:207421214:G:A\_A  
p = 0.02, beta = 0.141, N = 721

**SCEVPTR pc2**

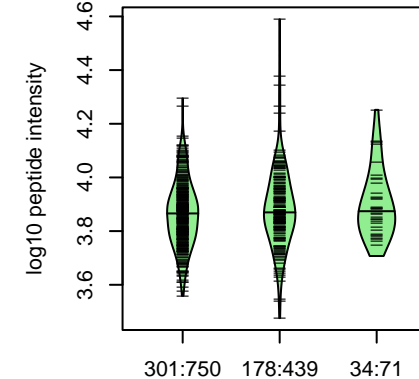

1:207421214:G:A\_A  
p = 0.063, beta = 0.131, N = 513

**CD55 : NP1  
P08174-5**

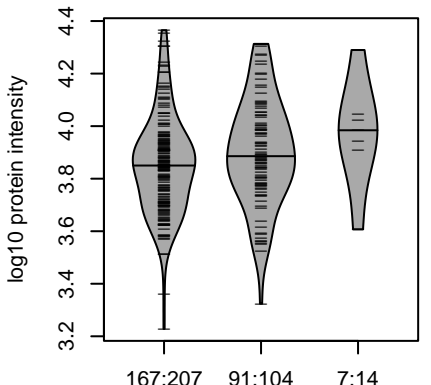

1:207421214:G:A\_A  
p = 0.017, beta = 0.267, N = 265

**LTCLQLNK pc2**

AP13;P08174;P08174-2;P08174-3;P0AP13;P08174;P08174-2;P08174-3;P0AP13;P08174;P08174-2;P08174-3;P03;B1AP15;P08174;P08174-2;P08174-

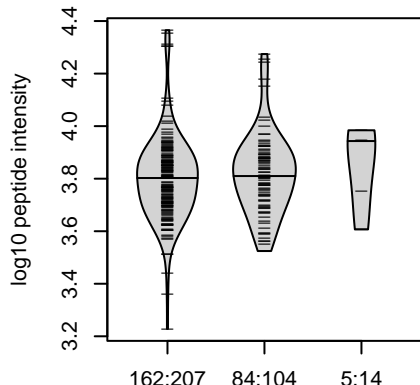

1:207421214:G:A\_A  
p = 0.21, beta = 0.149, N = 251

**SCEVPTR pc2**

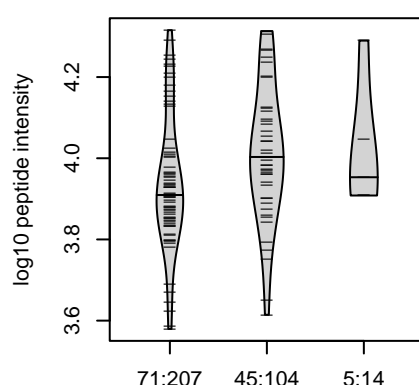

1:207421214:G:A\_A  
p = 0.0077, beta = 0.405, N = 121

**WSTAVEFCK pc2**

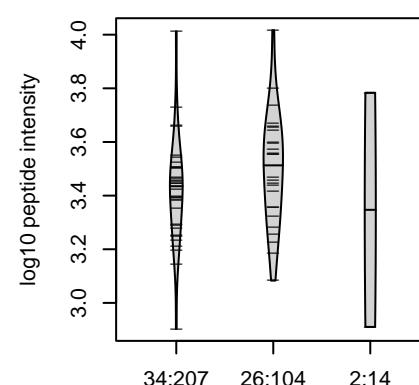

1:207421214:G:A\_A  
p = 0.46, beta = 0.162, N = 62

**TSFPEDTVITYK pc2**

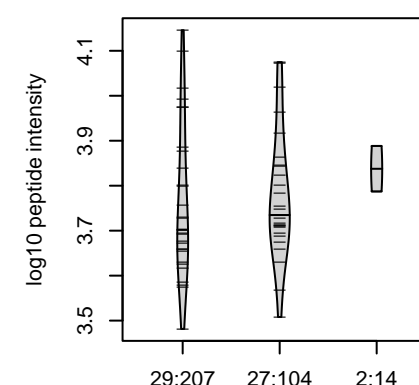

1:207421214:G:A\_A  
p = 0.75, beta = 0.0717, N = 58

Assay Target: CD55  
Olink UniProt: P08174  
UKB rsID: rs61822669  
Proxy rsID: rs61822669  
UKB SNP: 1:207421214:G:A  
Proxy SNP: 1:207421214:G:A  
UKB log10(p): 863.1  
UKB BETA: -0.457  
- - \* : - - : - - : - - \* : - -  
945:919:721:513:406:389:366:5

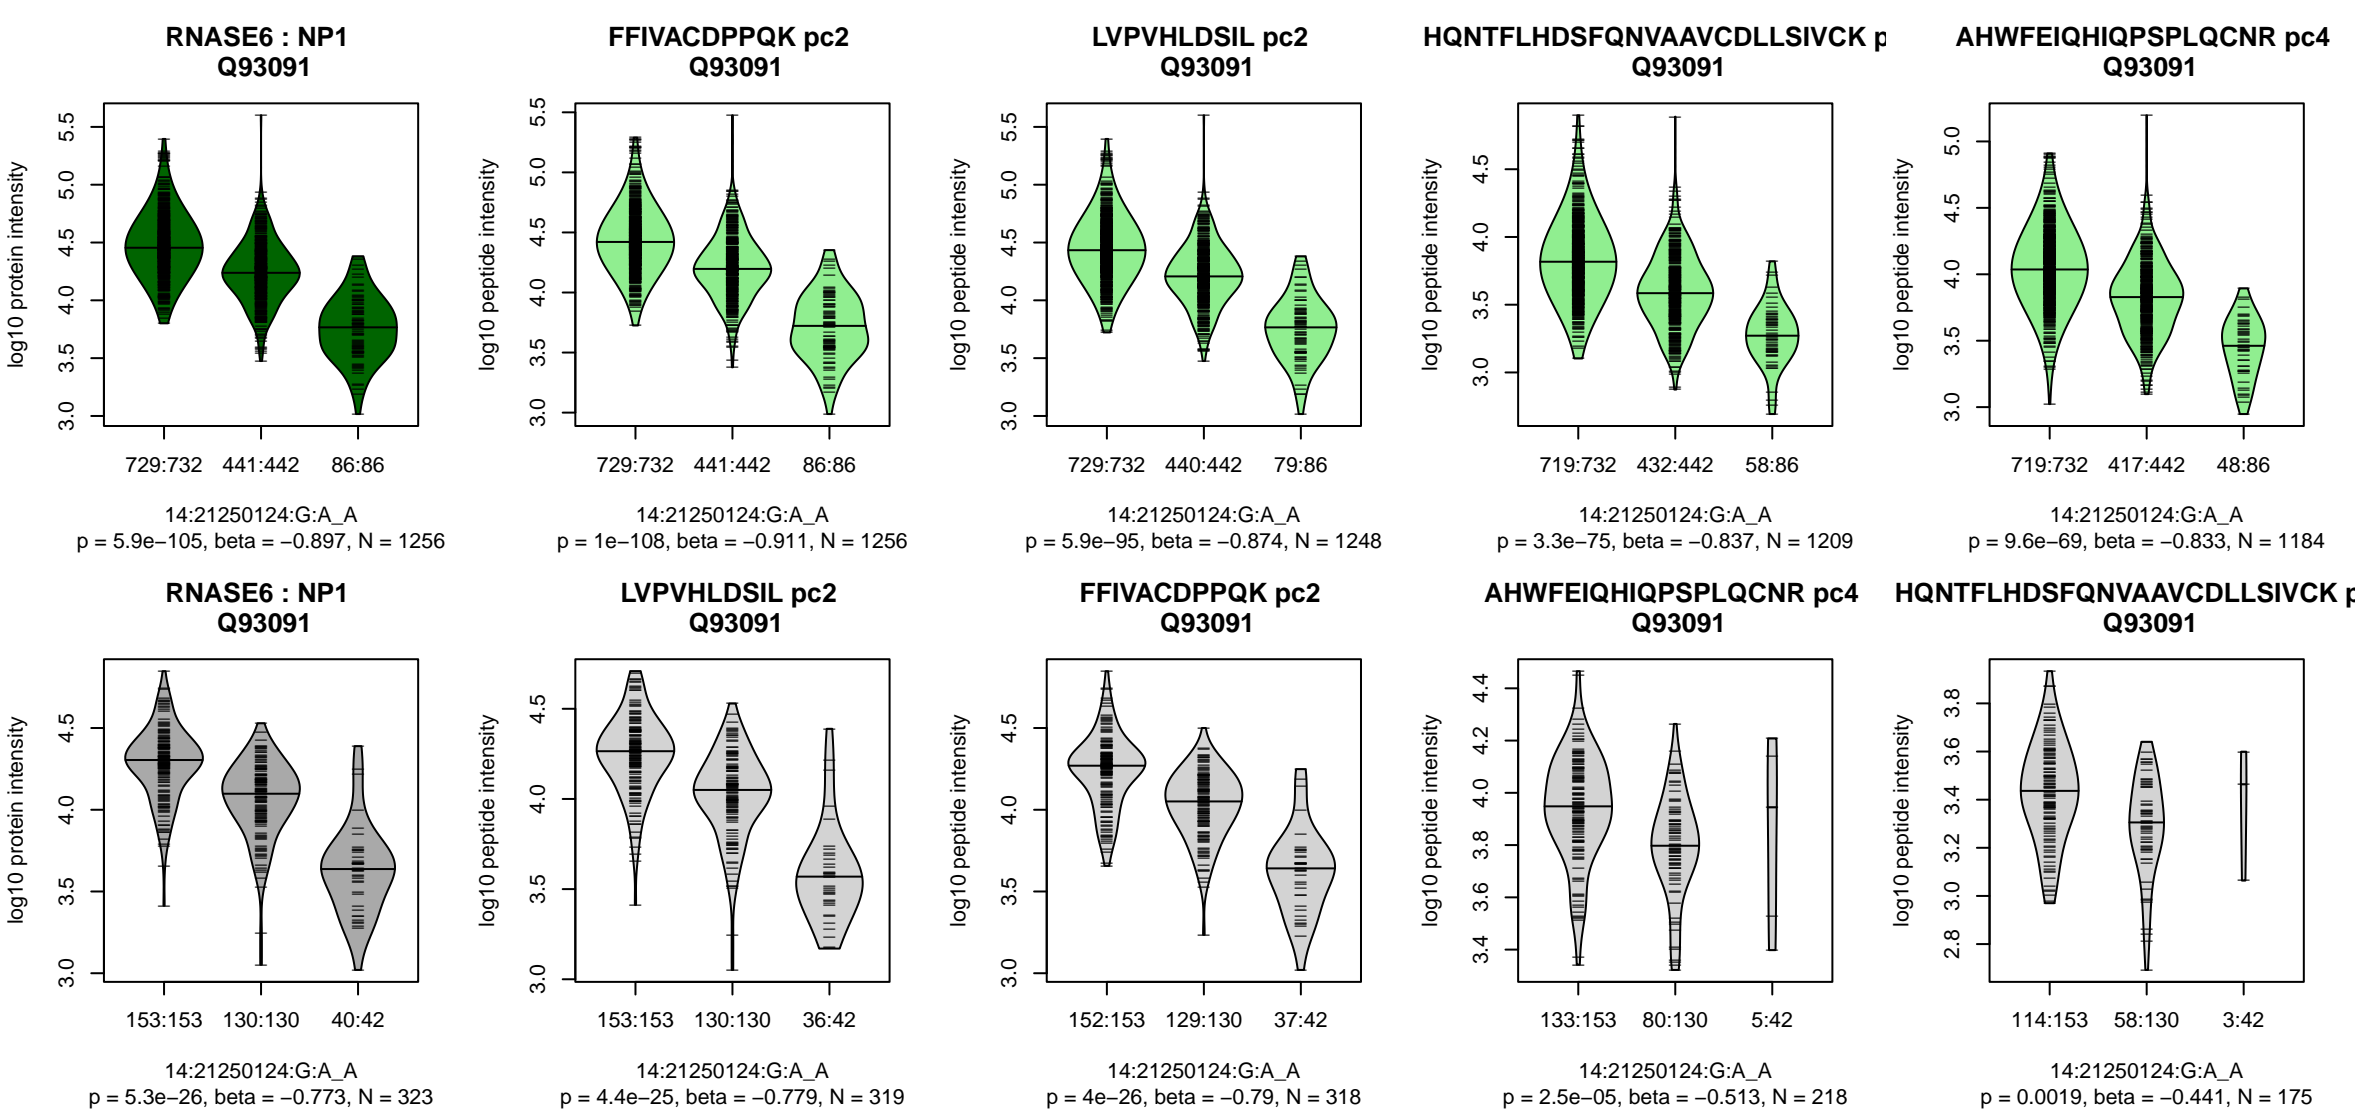

Assay Target: RNASE6  
 Olink UniProt: Q93091  
 UKB rsID: rs1045922  
 Proxy rsID: rs1045922  
 UKB SNP: 14:21250124:G:A  
 Proxy SNP: 14:21250124:G:A  
 UKB log10(p): 853.8  
 UKB BETA: -0.427  
 \*.\*.\*.\*.\*.\*.\*.\*.-:NA  
 1256:1248:1209:1184:1166:493



**THBS2 : NP4**  
A0A3B3ITK0;P35442

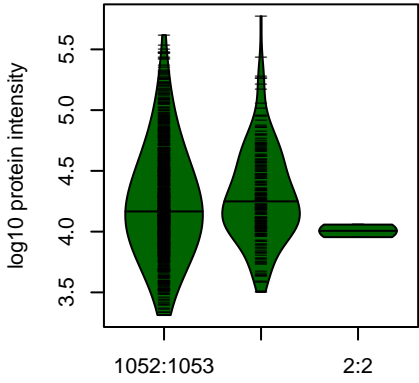

6:169624701:C:A\_A  
p = 0.11, beta = 0.121, N = 1259

**NALWHTGNTPGQVR pc3**  
A0A3B3ITK0;A0A7I2V585;A0A7I2YQT6;P0793ITK0;A0A7I2V585;A0A7I2YQT6;P0795;A0A7I2YQT6;F5H4Z8;P07996;P3544ITK0;A0A7I2V344;A0A7I2V585;A0A7I2V585

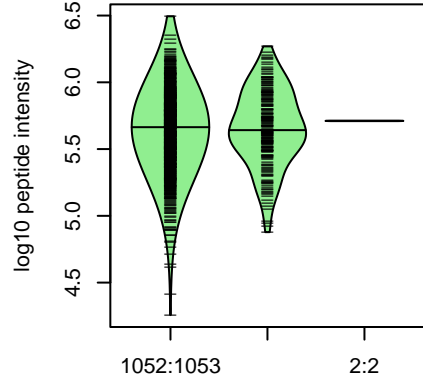

6:169624701:C:A\_A  
p = 0.35, beta = 0.0698, N = 1258

**TLWH DPR pc2**

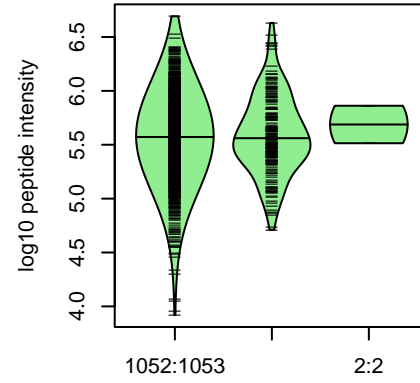

6:169624701:C:A\_A  
p = 0.42, beta = 0.0608, N = 1258

**FYVVMWK pc2**

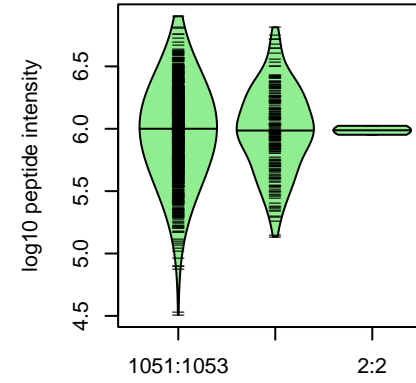

6:169624701:C:A\_A  
p = 0.7, beta = 0.0289, N = 1257

**HVVSLEDVGLADSQWK pc3**

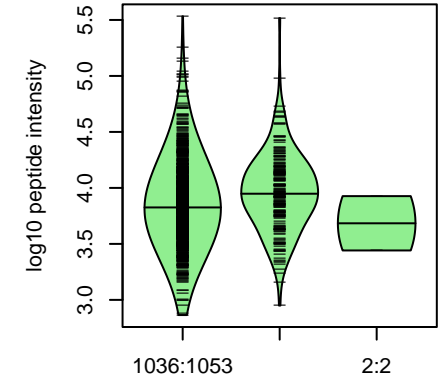

6:169624701:C:A\_A  
p = 0.00036, beta = 0.267, N = 1241

**THBS2 : NP4**  
A0A3B3ITK0;P35442

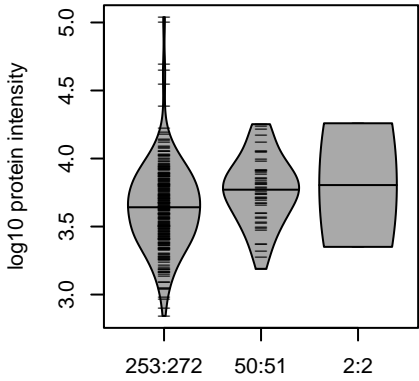

6:169624701:C:A\_A  
p = 0.0018, beta = 0.439, N = 305

**FYVVMWK pc2**  
A0A3B3ITK0;A0A7I2YQT6;F5H4Z8;P07996;P3544ITK0;A0A7I2V585;A0A7I2YQT6;P0793ITK0;A0A7I2V585;A0A7I2YQT6;P0795;A0A7I2YQT6;F5H4Z8;P07996;P3544ITK0;A0A7I2V344;A0A7I2V585;A0A7I2V585

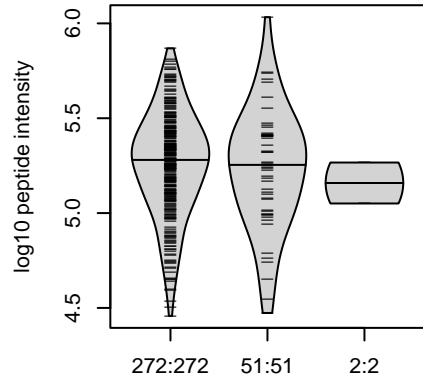

6:169624701:C:A\_A  
p = 0.34, beta = -0.133, N = 325

**NALWHTGNTPGQVR pc2**

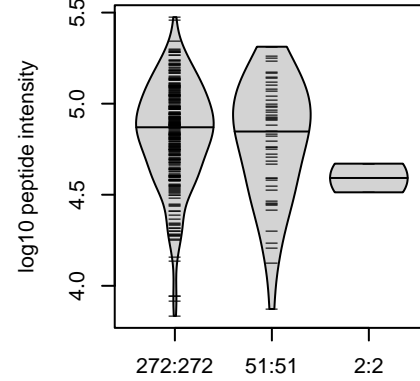

6:169624701:C:A\_A  
p = 0.18, beta = -0.188, N = 325

**TLWH DPR pc2**

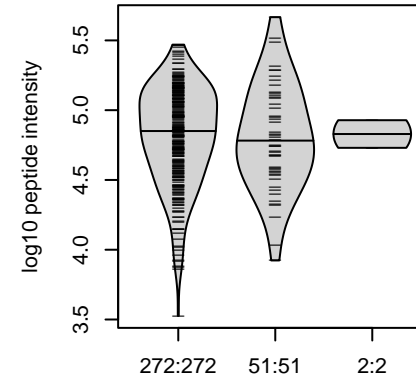

6:169624701:C:A\_A  
p = 0.9, beta = -0.017, N = 325

**ACQGAPCPIDGR pc2**  
A0A3B3ITK0;A0A7I2YQT6;P35442

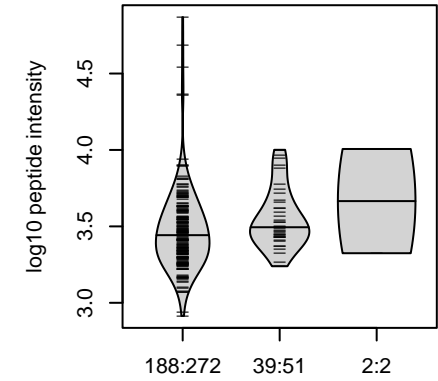

6:169624701:C:A\_A  
p = 0.0026, beta = 0.47, N = 229

Assay Target: THBS2  
Olink UniProt: P35442  
UKB rsID: rs78109196  
Proxy rsID: rs78109196  
UKB SNP: 6:169624701:C:A  
Proxy SNP: 6:169624701:C:A  
UKB log10(p): 837.4  
UKB BETA: 0.639  
-----\*-----\*-----\*-----\*  
1258:1258:1257:1241:1218:121

**KLK14 : NP4  
Q9P0G3**

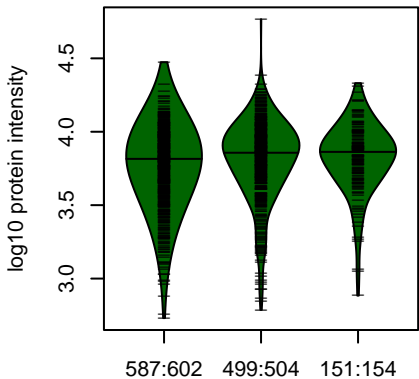

19:51584916:G:A\_A  
p = 0.023, beta = 0.0934, N = 1237

**CALPGYPGVYTNLCK pc2  
A0A1R3UHJ7;Q9P0G3**

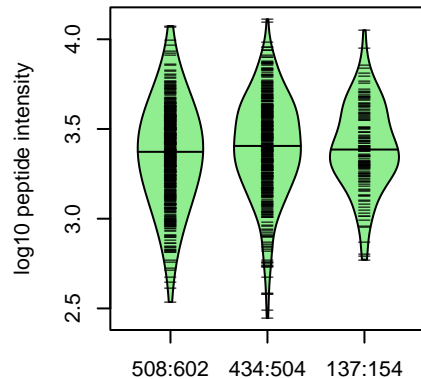

19:51584916:G:A\_A  
p = 0.16, beta = 0.0612, N = 1079

**TITPGMVCAGVPQGGK pc2  
A0A1R3UHJ7;Q9P0G3**

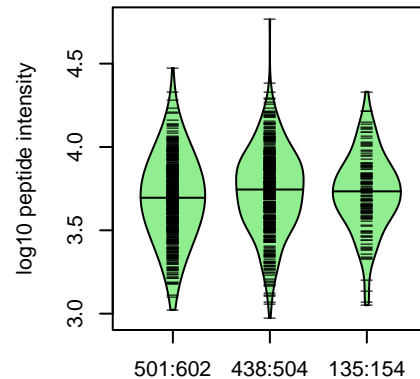

19:51584916:G:A\_A  
p = 0.073, beta = 0.0789, N = 1074

**GQLQGLVSWGMER pc2  
A0A1R3UHJ7;Q9P0G3**

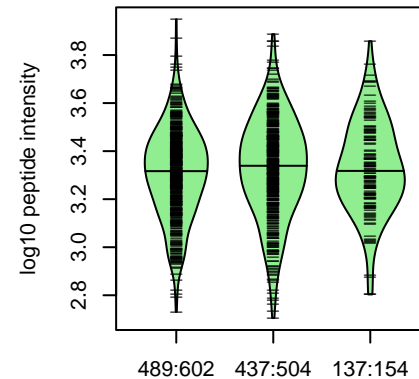

19:51584916:G:A\_A  
p = 0.19, beta = 0.0582, N = 1063

**VSGWGTISSPIAR pc2  
A0A1R3UHJ7;Q9P0G3**

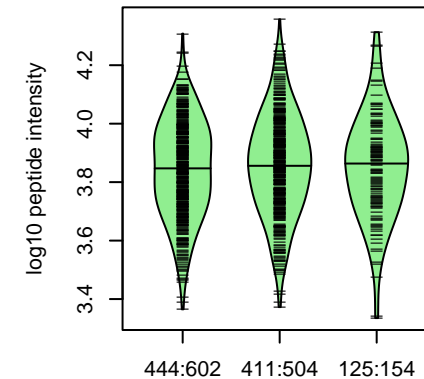

19:51584916:G:A\_A  
p = 0.39, beta = 0.0397, N = 980

**KLK14 : NP4  
A0A1R3UHJ7;Q9P0G3**

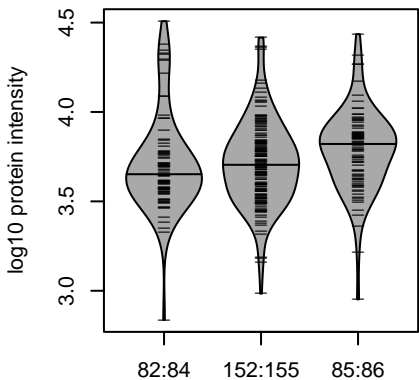

19:51584916:G:A\_A  
p = 0.11, beta = 0.123, N = 319

**VSGWGTISSPIAR pc2  
A0A1R3UHJ7;Q9P0G3**

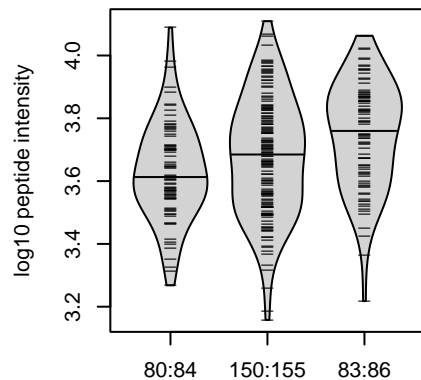

19:51584916:G:A\_A  
p = 0.0019, beta = 0.239, N = 313

**SSQPWQAALLAGPR pc2  
A0A1R3UHJ7;Q9P0G3**

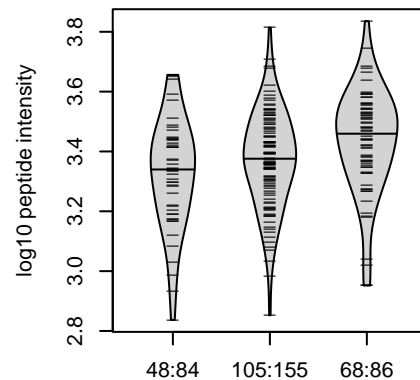

19:51584916:G:A\_A  
p = 0.014, beta = 0.225, N = 221

**TITPGMVCAGVPQGGK pc2  
A0A1R3UHJ7;Q9P0G3**

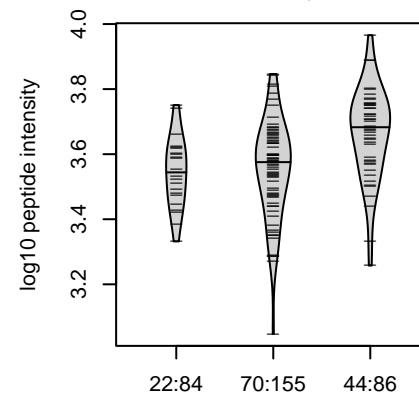

19:51584916:G:A\_A  
p = 0.0099, beta = 0.315, N = 136

**DSCQGDSGGPLVCR pc2  
A0A1R3UHJ7;Q9P0G3**

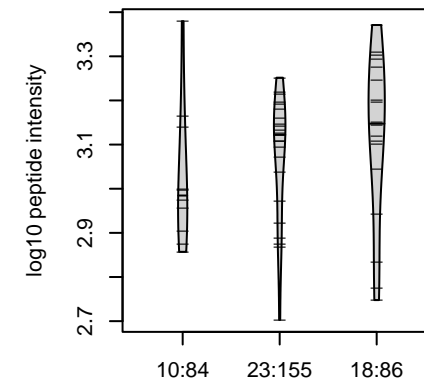

19:51584916:G:A\_A  
p = 0.99, beta = -0.00269, N = 51

**IIGHTCTR pc2  
rs2569491 REF**

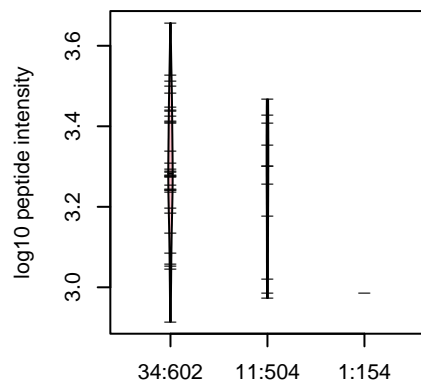

19:51584916:G:A\_A  
p = 0.00042, model = REC, N = 46

Assay Target: KLK14  
Olink UniProt: Q9P0G3  
UKB rsID: rs2569491  
Proxy rsID: rs2569491  
UKB SNP: 19:51584916:G:A  
Proxy SNP: 19:51584916:G:A  
UKB log10(p): 834.9  
UKB BETA: 0.402  
- - - - -NA  
1079:1074:1063:980:925:555:44

**CELSR2 : NP1  
Q9HCU4**

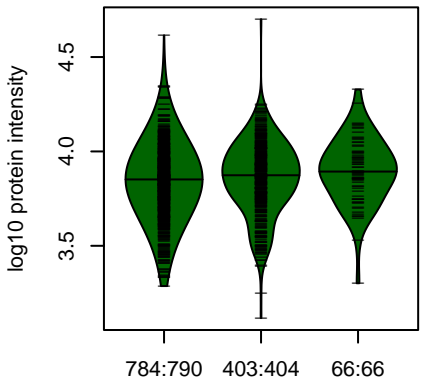

1:109817590:G:T\_T  
p = 0.0023, beta = 0.145, N = 1253

**LAQAPGLR pc2  
Q9HCU4**

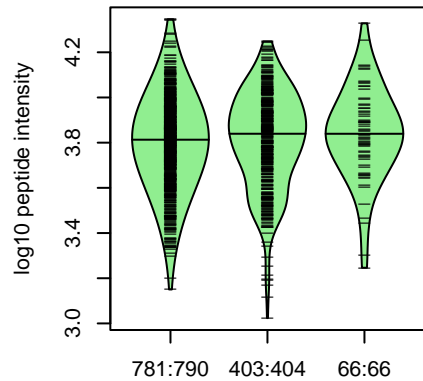

1:109817590:G:T\_T  
p = 0.078, beta = 0.0839, N = 1250

**LLGIGGHLSPQGK pc3  
Q9HCU4**

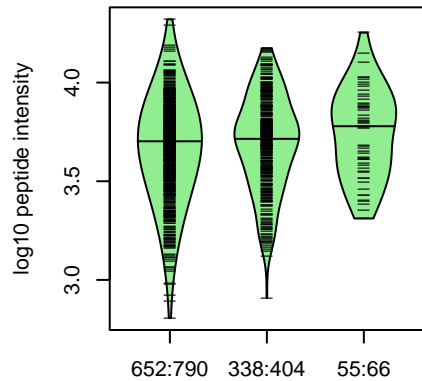

1:109817590:G:T\_T  
p = 0.0026, beta = 0.156, N = 1045

**LTLPEEHPCLK pc3  
Q9HCU4**

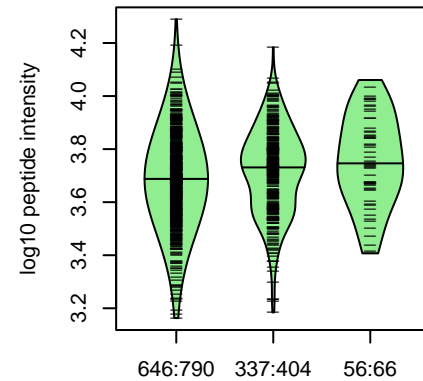

1:109817590:G:T\_T  
p = 0.00017, beta = 0.195, N = 1039

**DAGTELTGHLVPHHDGLR pc4  
Q9HCU4**

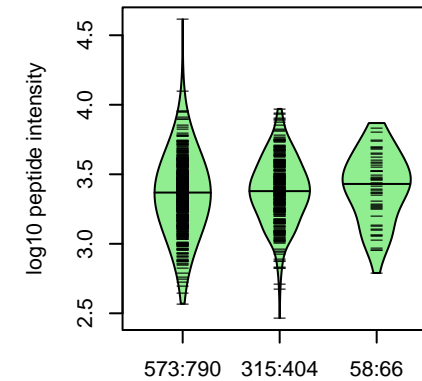

1:109817590:G:T\_T  
p = 0.02, beta = 0.124, N = 946

**CELSR2 : NP1  
Q9HCU4**

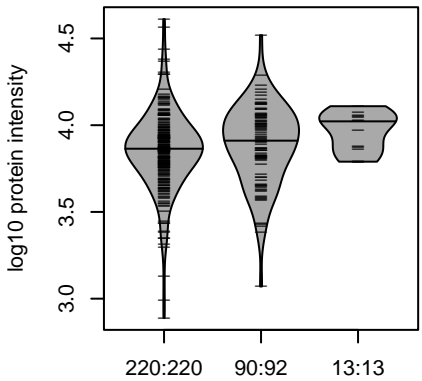

1:109817590:G:T\_T  
p = 0.034, beta = 0.208, N = 323

**LAQAPGLR pc2  
Q9HCU4**

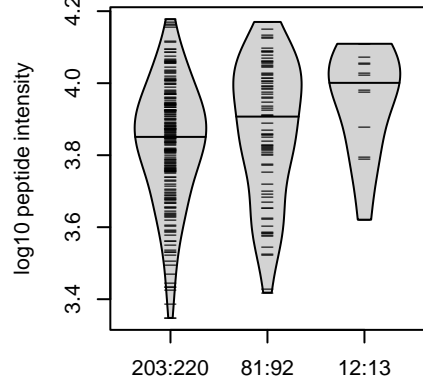

1:109817590:G:T\_T  
p = 0.007, beta = 0.276, N = 296

**LLGIGGHLSPQGK pc3  
Q9HCU4**

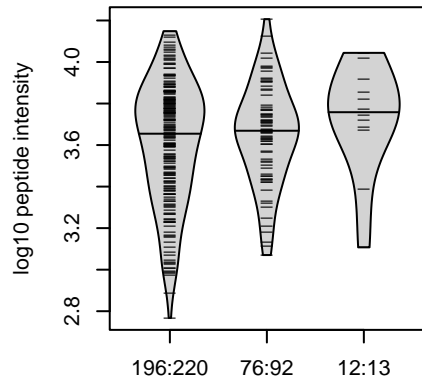

1:109817590:G:T\_T  
p = 0.25, beta = 0.12, N = 284

**LTLPEEHPCLK pc3  
Q9HCU4**

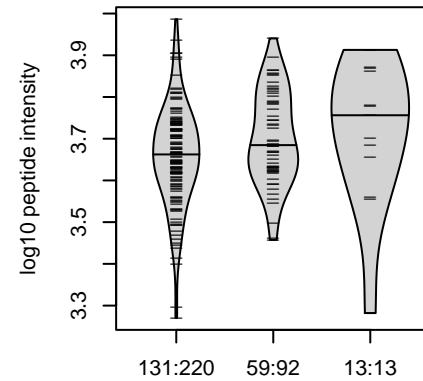

1:109817590:G:T\_T  
p = 0.0041, beta = 0.322, N = 203

**DAGTELTGHLVPHHDGLR pc4  
Q9HCU4**

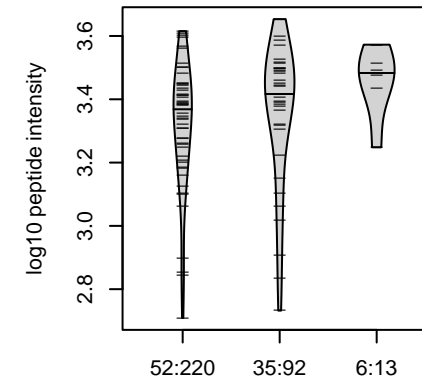

1:109817590:G:T\_T  
p = 0.32, beta = 0.164, N = 93

Assay Target: CELSR2  
Olink UniProt: Q9HCU4  
UKB rsID: rs12740374  
Proxy rsID: rs12740374  
UKB SNP: 1:109817590:G:T  
Proxy SNP: 1:109817590:G:T  
UKB log10(p): 813.5  
UKB BETA: 0.451  
- - \* \* - - - - -  
1250:1045:1039:965:946:786:34

**SMOC2 : NP3**  
**Q9H3U7;Q9H3U7-2**

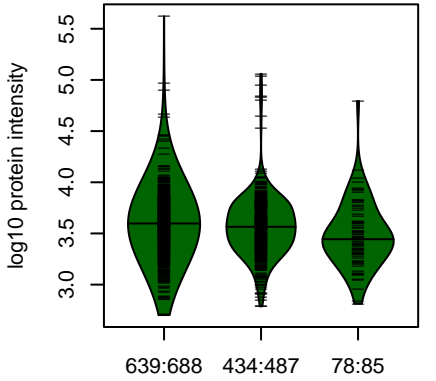

6:168867417:T:C\_C  
 $\rho = 0.0098$ ,  $\beta = -0.122$ ,  $N = 1151$

**FSALTFLR pc2**  
**Q9H3U7;Q9H3U7-2**

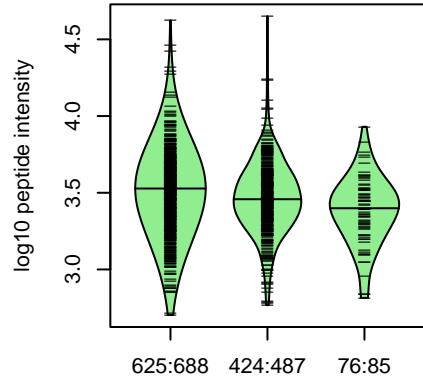

6:168867417:T:C\_C  
 $\rho = 2.7e-05$ ,  $\beta = -0.2$ ,  $N = 1125$

**PLCASDGR pc2**  
**Q9H3U7;Q9H3U7-2**

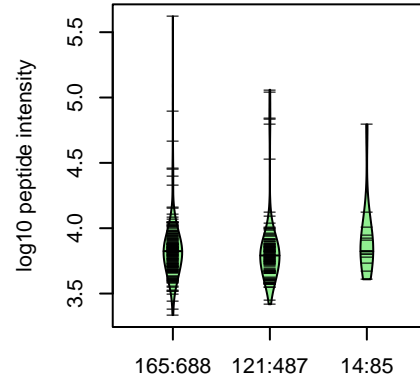

6:168867417:T:C\_C  
 $\rho = 0.83$ ,  $\beta = 0.0206$ ,  $N = 300$

**DPQLEIAYR pc2**  
**Q9H3U7;Q9H3U7-2**

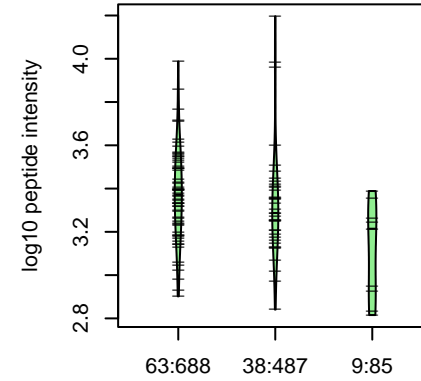

6:168867417:T:C\_C  
 $\rho = 0.15$ ,  $\beta = -0.207$ ,  $N = 110$

**YPTLWTEQVK pc2**  
**Q9H3U7;Q9H3U7-2**

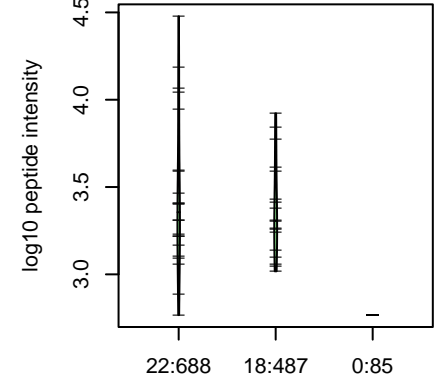

6:168867417:T:C\_C  
 $\rho = 0.52$ ,  $\beta = -0.194$ ,  $N = 40$

Assay Target: SMOC2  
 Olink UniProt: Q9H3U7  
 UKB rsID: rs11759500  
 Proxy rsID: rs11759500  
 UKB SNP: 6:168867417:T:C  
 Proxy SNP: 6:168867417:T:C  
 UKB log10(p): 784.1  
 UKB BETA: -0.384  
 \*:-:-:-:-:NA:NA:NA:NA:NA:N  
 1125:300:110:40:38:21:15:11:3:





**ACP1 : NP3  
P24666**

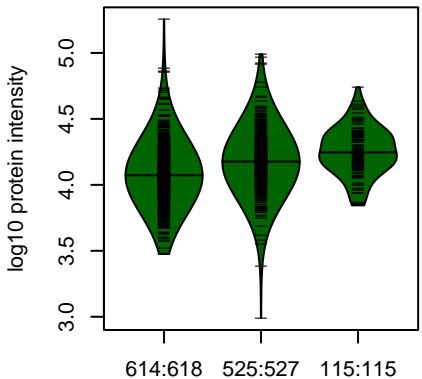

2:280819:G:A\_A  
p = 2.1e-26, beta = 0.45, N = 1254

**IELLSYDPQK pc2  
P24666;P24666-2**

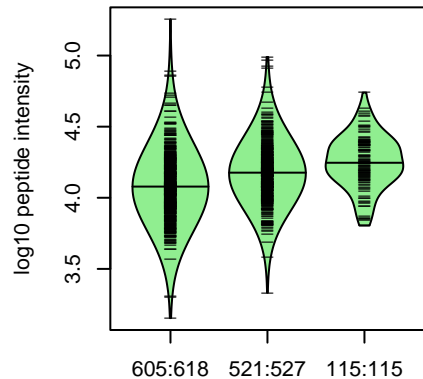

2:280819:G:A\_A  
p = 1.3e-25, beta = 0.444, N = 1241

**SVLFVCLGNICR pc2  
I2;F2Z2Q9;G5E9R5;P24666;P24666-2**

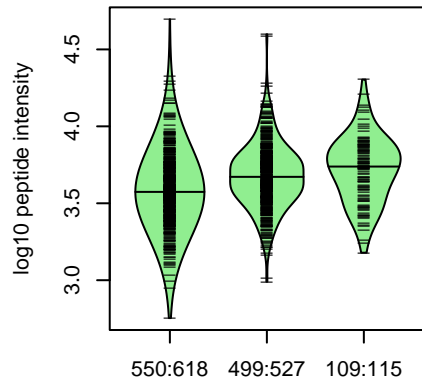

2:280819:G:A\_A  
p = 4.8e-16, beta = 0.36, N = 1158

**LVTDQNIENWR pc2  
F2Z2Q9;G5E9R5;P24666;P24666-I2;F2Z2Q9;G5E9R5;P24666;P24666-2**

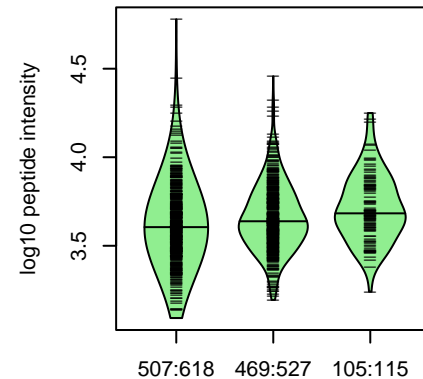

2:280819:G:A\_A  
p = 3e-08, beta = 0.255, N = 1081

**SPIAEAVFR pc2**

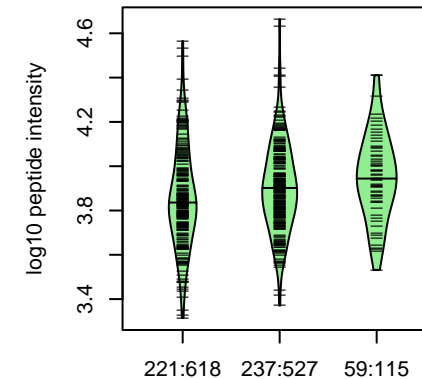

2:280819:G:A\_A  
p = 8e-05, beta = 0.256, N = 517

**ACP1 : NP3  
P24666**

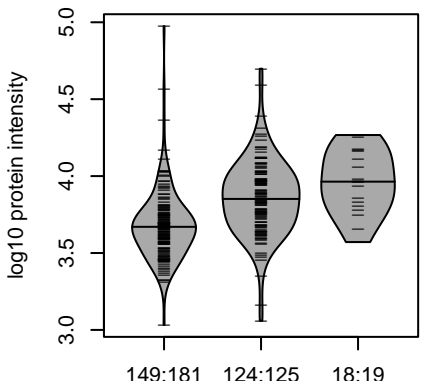

2:280819:G:A\_A  
p = 1.3e-13, beta = 0.671, N = 291

**IELLSYDPQK pc2  
P24666;P24666-2**

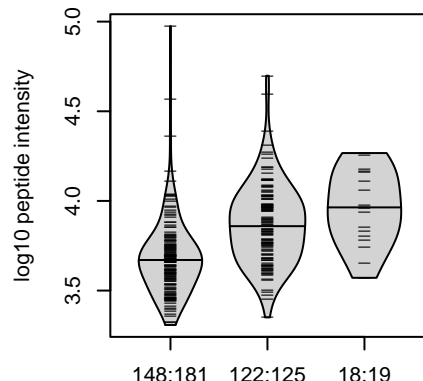

2:280819:G:A\_A  
p = 3.7e-15, beta = 0.711, N = 288

**LVTDQNIENWR pc2  
F2Z2Q9;G5E9R5;P24666;P24666-I2;F2Z2Q9;G5E9R5;P24666;P24666-2I2;F2Z2Q9;G5E9R5;P24666;P24666-2**

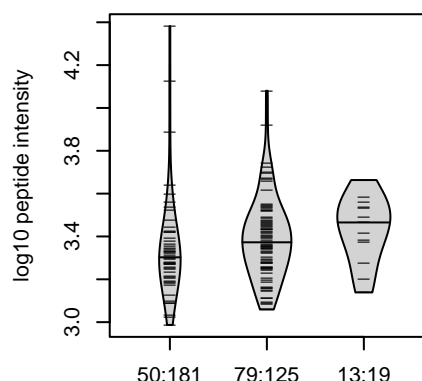

2:280819:G:A\_A  
p = 0.042, beta = 0.27, N = 142

**SVLFVCLGNICR pc2**

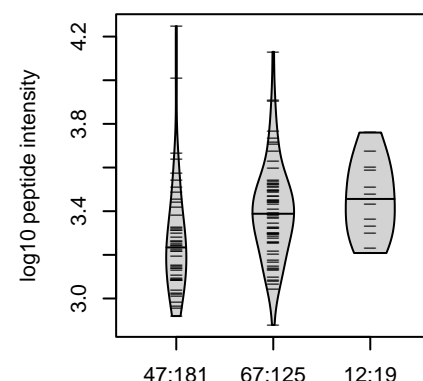

2:280819:G:A\_A  
p = 0.0048, beta = 0.386, N = 126

**SPIAEAVFR pc2**

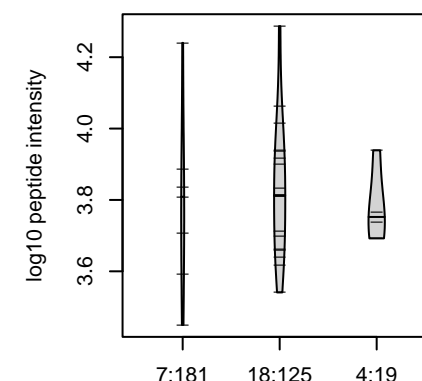

2:280819:G:A\_A  
p = 0.33, beta = -0.278, N = 29

Assay Target: ACP1  
Olink UniProt: P24666  
UKB rsID: rs7605824  
Proxy rsID: rs7605824  
UKB SNP: 2:280819:G:A  
Proxy SNP: 2:280819:G:A  
UKB log10(p): 736.8  
UKB BETA: -0.376  
\*:\*:\*:\*:-:-:-:NA:NA:NA  
1241:1158:1081:517:226:165:1

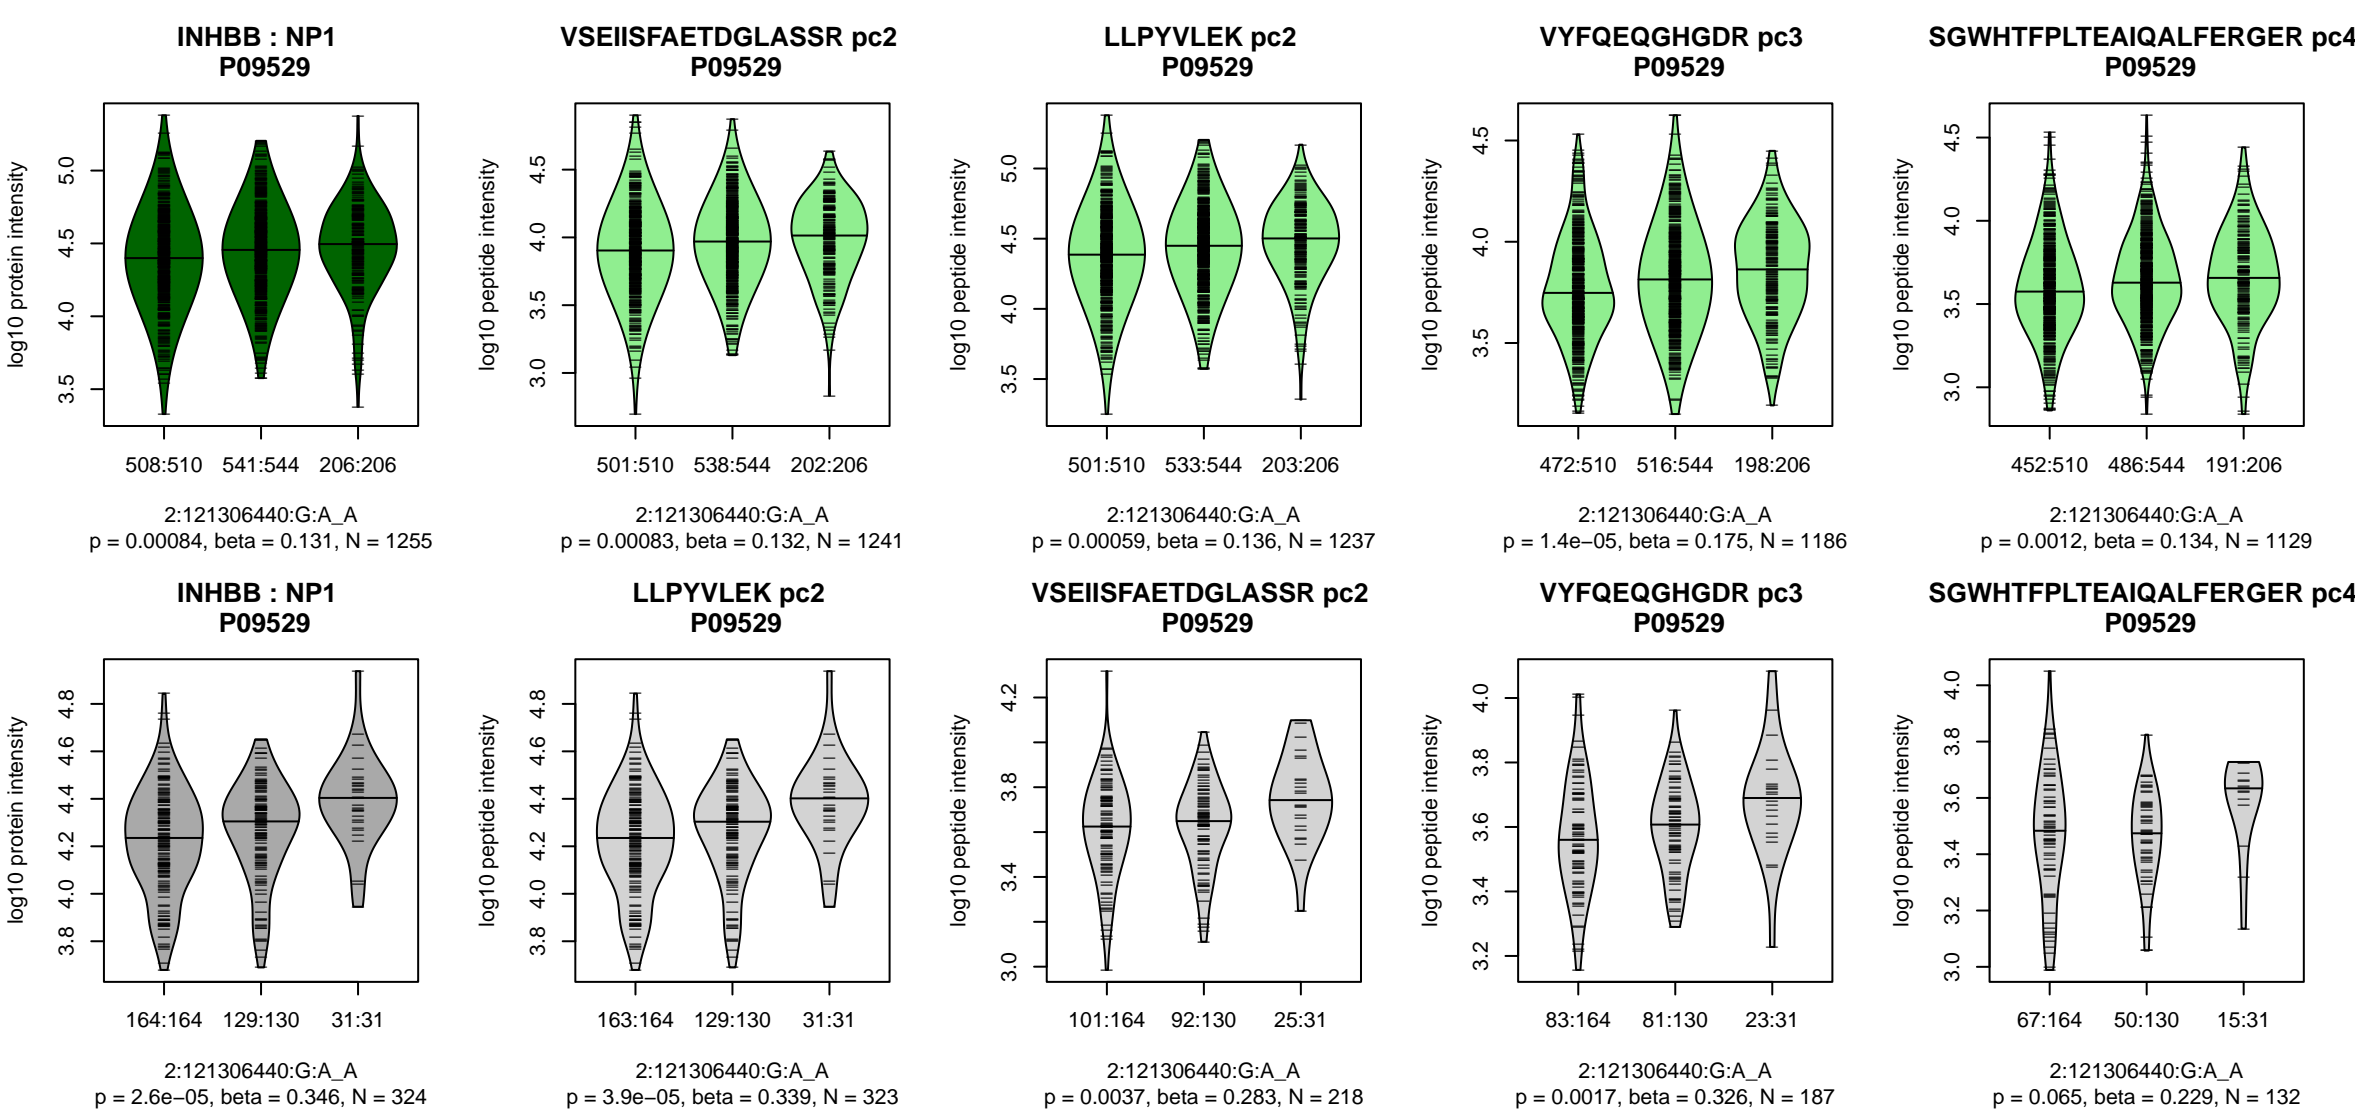

Assay Target: INHBB  
 Olink UniProt: P09529  
 UKB rsID: rs17050272  
 Proxy rsID: rs17050272  
 UKB SNP: 2:121306440:G:A  
 Proxy SNP: 2:121306440:G:A  
 UKB log10(p): 735  
 UKB BETA: 0.355  
 \*.\*.\*.\*-:-:-:-:-:-:-:-:-:-NA  
 1241:1237:1186:1129:751:500:3



**CDH15 : NP2**  
**P55291**

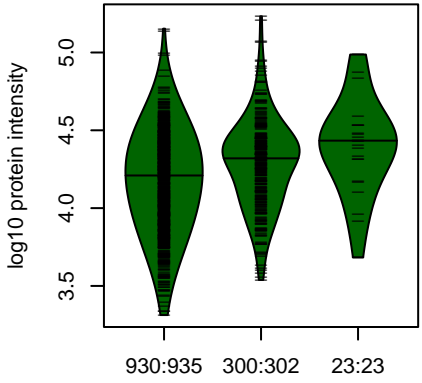

16:89199108:G:A\_A  
p = 2.8e-12, beta = 0.4, N = 1253

**VLEGAVPGYVTR pc2**  
**P55291**

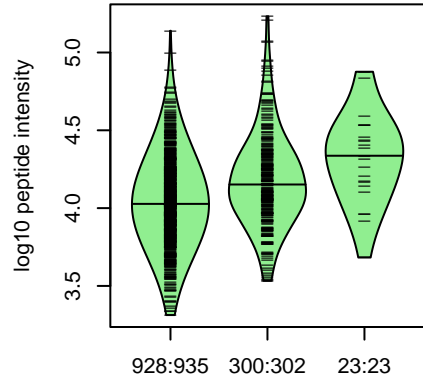

16:89199108:G:A\_A  
p = 1.4e-21, beta = 0.542, N = 1251

**VFLNAMLDR pc2**  
**P55291**

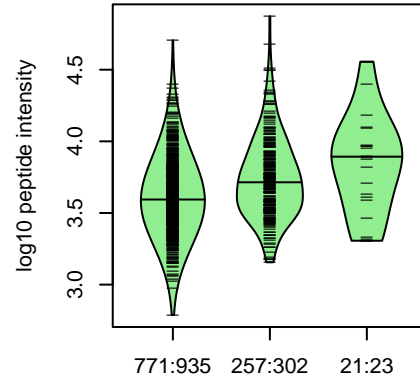

16:89199108:G:A\_A  
p = 9.1e-16, beta = 0.493, N = 1049

**TNEGVLIVK pc2**  
**P55291**

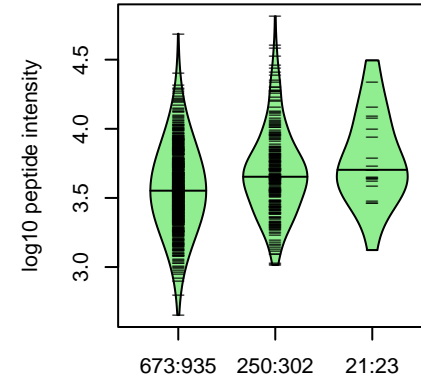

16:89199108:G:A\_A  
p = 4.6e-11, beta = 0.415, N = 944

**ALDYESCEHYELK pc3**  
**P55291**

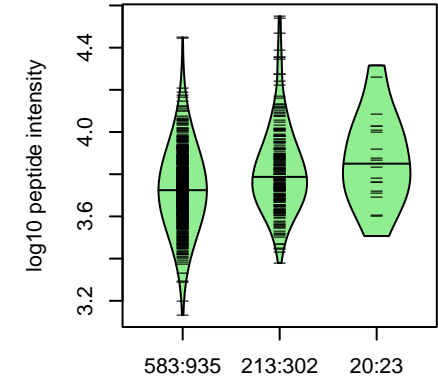

16:89199108:G:A\_A  
p = 9e-12, beta = 0.457, N = 816

**CDH15 : NP2**  
**P55291**

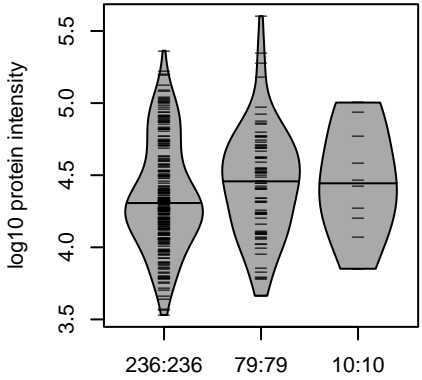

16:89199108:G:A\_A  
p = 0.11, beta = 0.169, N = 325

**VLEGAVPGYVTR pc2**  
**P55291**

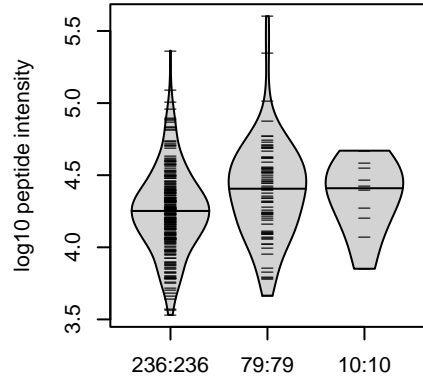

16:89199108:G:A\_A  
p = 0.0011, beta = 0.341, N = 325

**VFLNAMLDR pc2**  
**P55291**

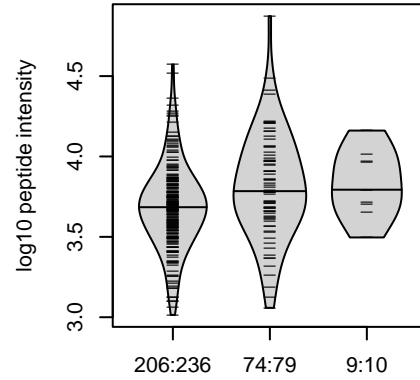

16:89199108:G:A\_A  
p = 0.00072, beta = 0.368, N = 289

**TNEGVLIVK pc2**  
**P55291**

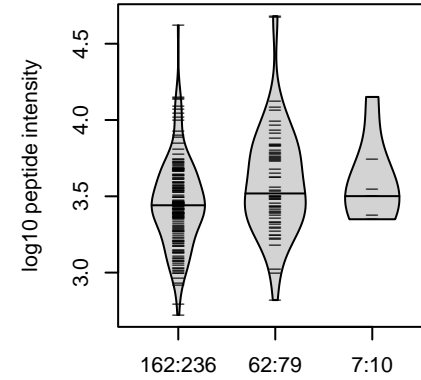

16:89199108:G:A\_A  
p = 0.0019, beta = 0.375, N = 231

**AWVIPPISVSENHK pc3**  
**P55291**

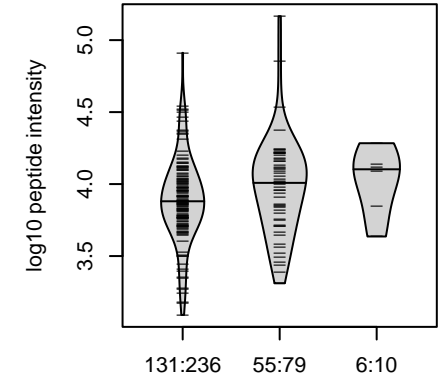

16:89199108:G:A\_A  
p = 0.036, beta = 0.275, N = 192

Assay Target: CDH15  
Olink UniProt: P55291  
UKB rsID: rs11646135  
Proxy rsID: rs11646135  
UKB SNP: 16:89199108:G:A  
Proxy SNP: 16:89199108:G:A  
UKB log10(p): 728.6  
UKB BETA: 0.432  
\*\*\*\*\*-\*\*\*\*\*-\*\*\*\*\*-\*\*\*\*\*-\*\*\*\*\*  
1251:1049:944:816:654:625:590



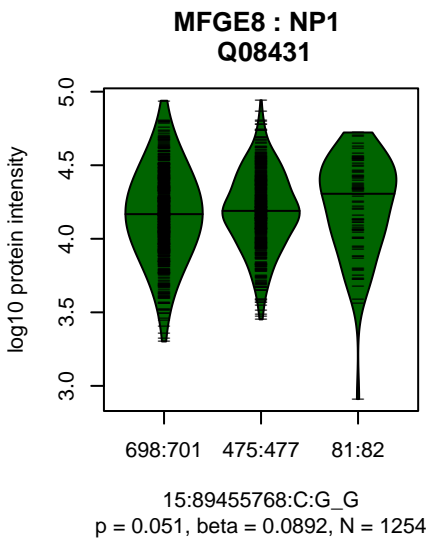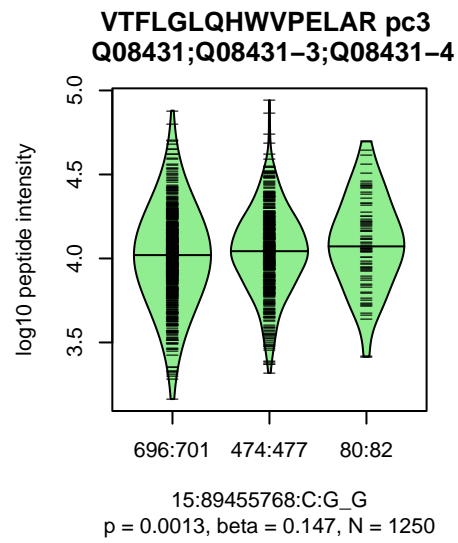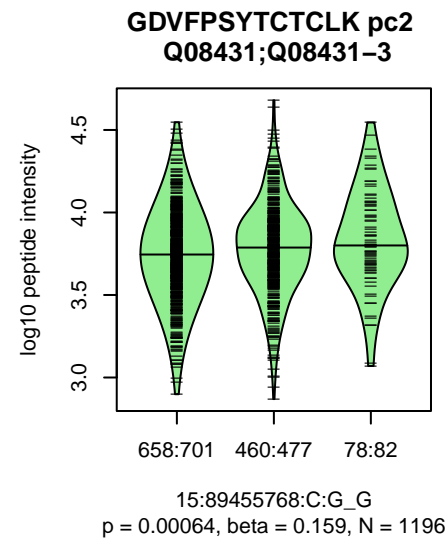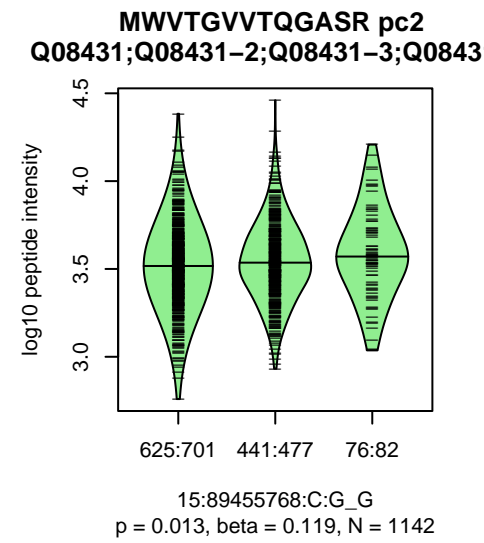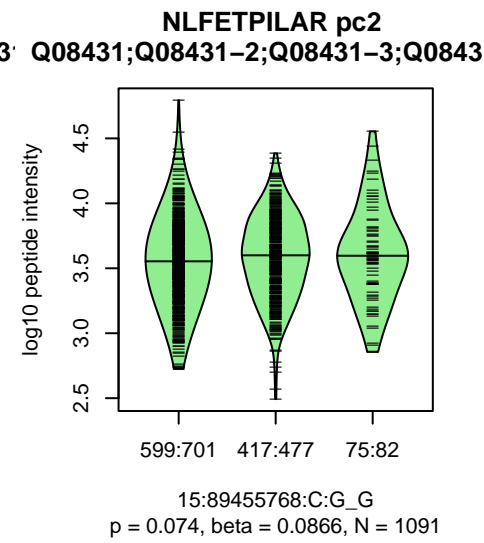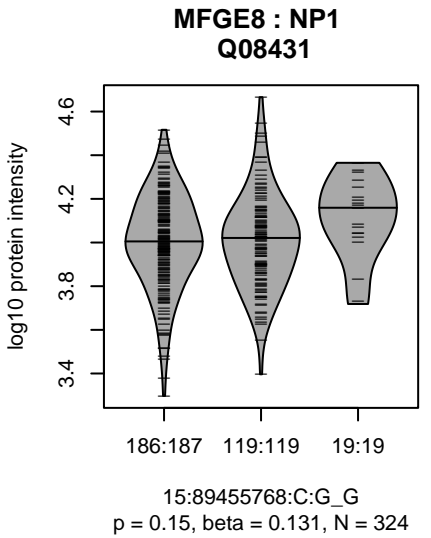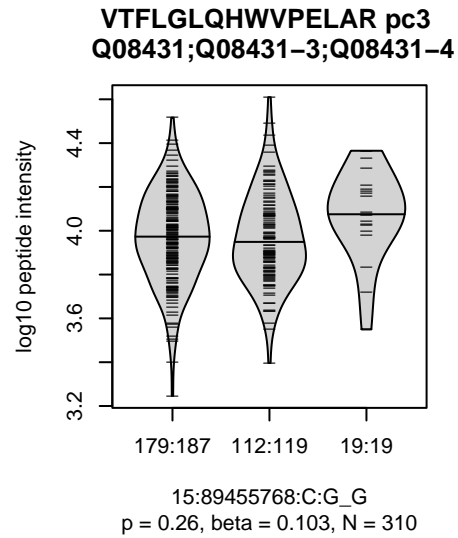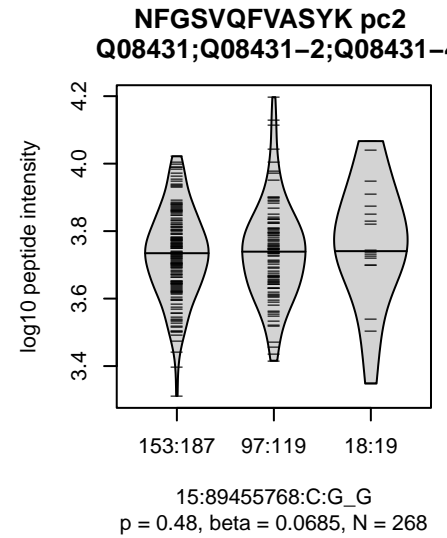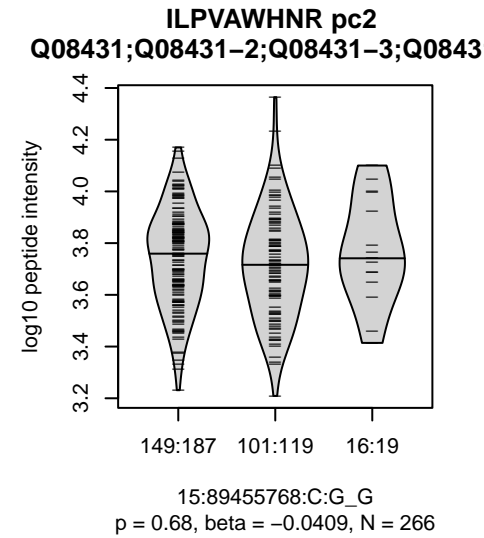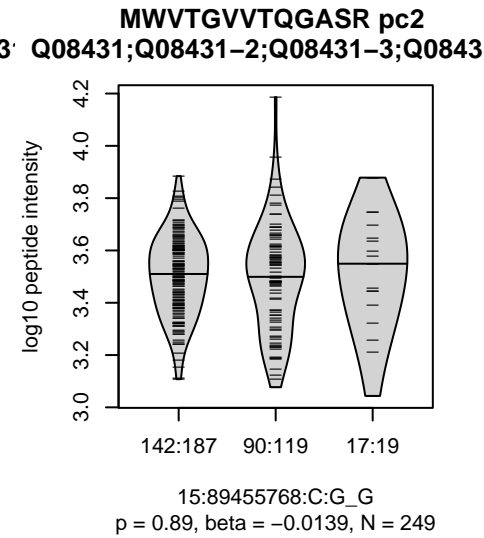

**CVEPLGLENGNIANSQIAASSVR pc**  
**rs1878326 REF**

Assay Target: MFGE8  
Olink UniProt: Q08431  
UKB rsID: rs34239095  
Proxy rsID: rs34239095  
UKB SNP: 15:89455768:C:G  
Proxy SNP: 15:89455768:C:G  
UKB log10(p): 717.1  
UKB BETA: 0.383  
\*:\*:-----

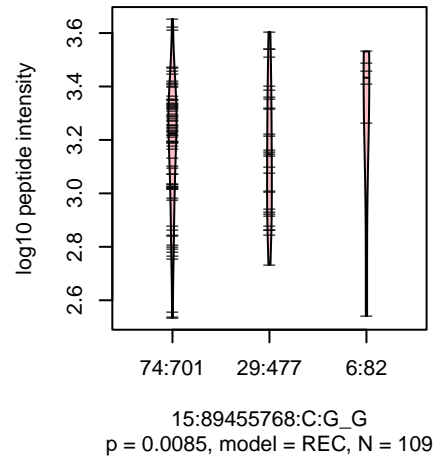

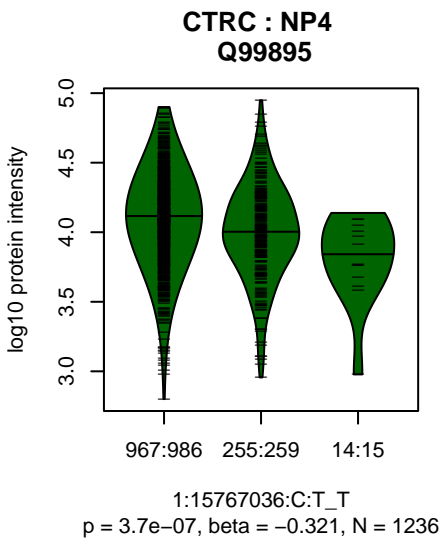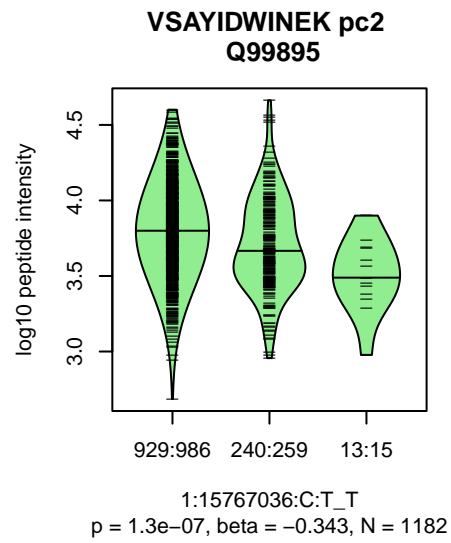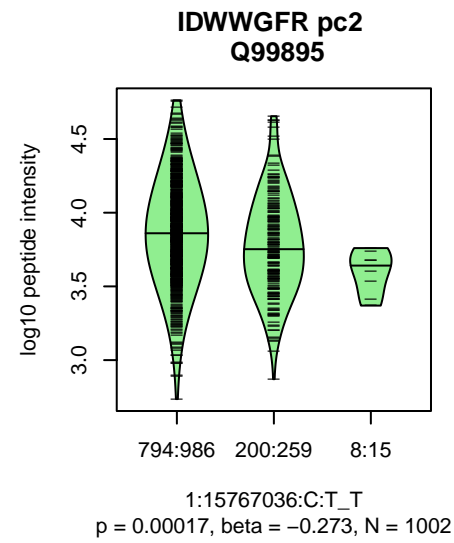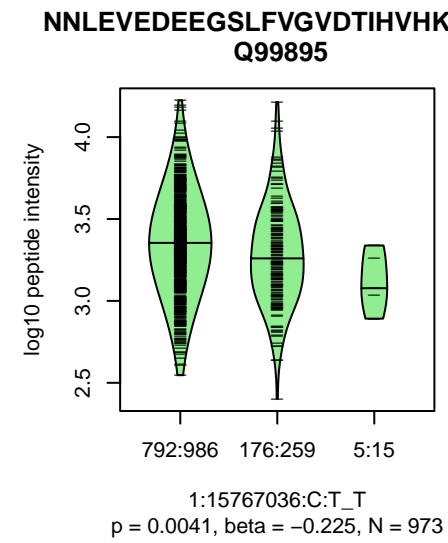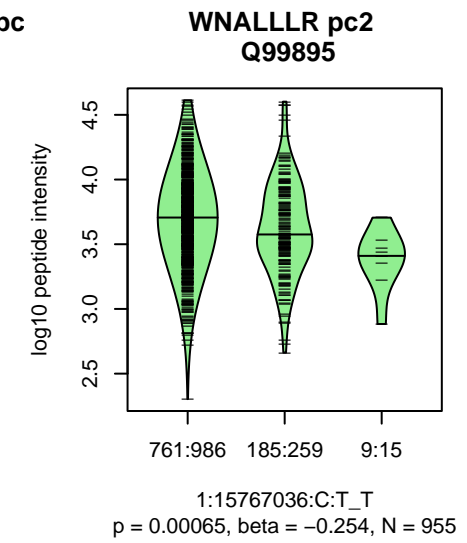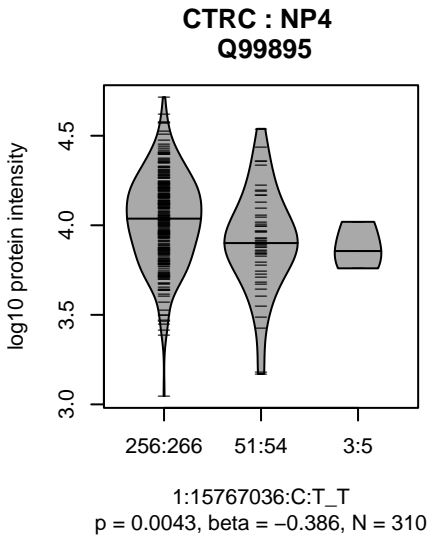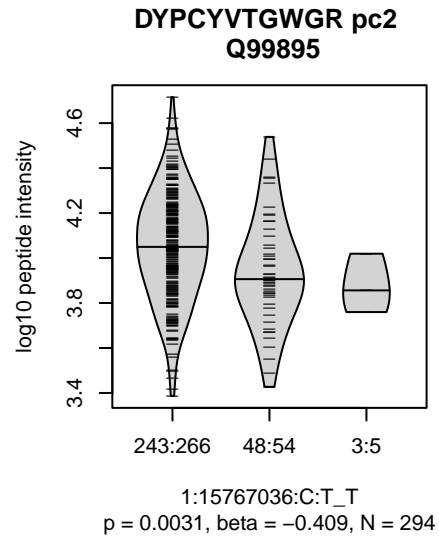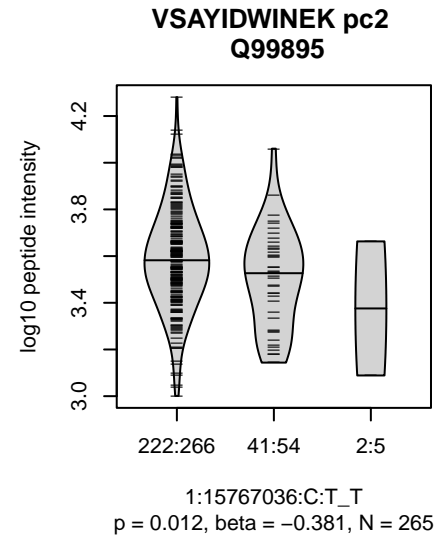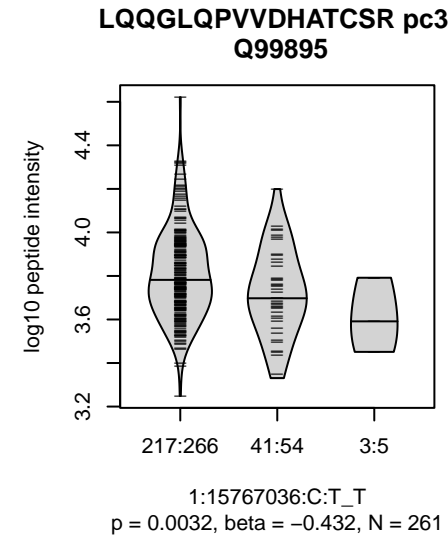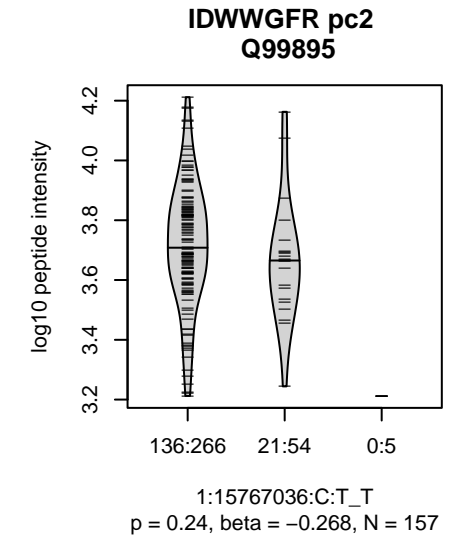

Assay Target: CTRC  
 Olink UniProt: Q99895  
 UKB rsID: rs497078  
 Proxy rsID: rs497078  
 UKB SNP: 1:15767036:C:T  
 Proxy SNP: 1:15767036:C:T  
 UKB log10(p): 716.9  
 UKB BETA: -0.552  
 \*\*:\*:\*:-:-:-:-:NA  
 1182:1002:973:955:944:893:852

**DKK3 : NP2  
Q9UBP4**

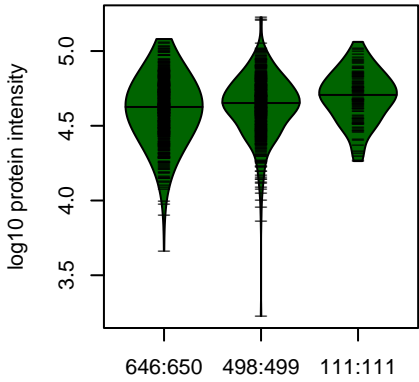

11:12038874:G:A\_A  
p = 1.7e-05, beta = 0.186, N = 1255

**DCQPGLCCAFQR pc2  
F6SYF8;Q9UBP4**

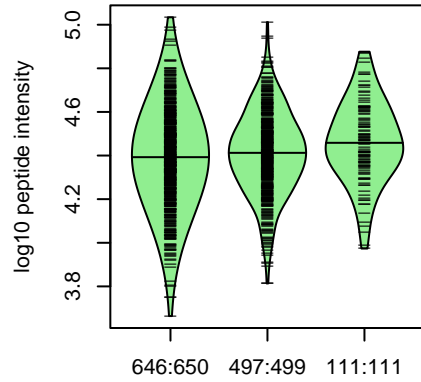

11:12038874:G:A\_A  
p = 0.00068, beta = 0.147, N = 1254

**DSECCGDQLCVWGHCTK pc3  
F6SYF8;Q9UBP4**

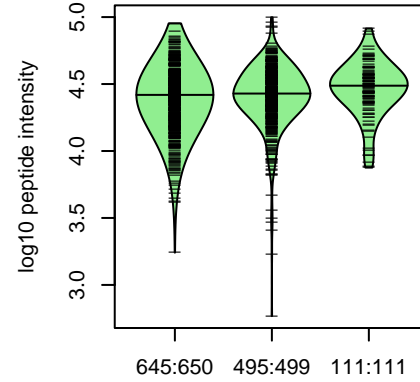

11:12038874:G:A\_A  
p = 3e-04, beta = 0.156, N = 1251

**SAVEEMEAEAAAK pc2  
F6SYF8;Q9UBP4**

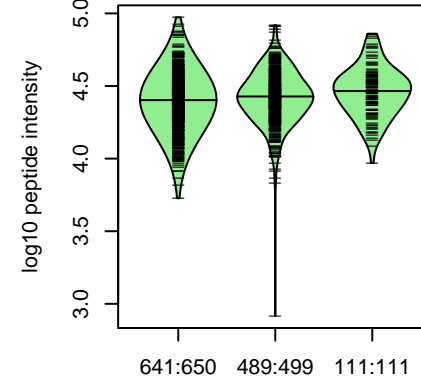

11:12038874:G:A\_A  
p = 4.5e-05, beta = 0.177, N = 1241

**EVEELMEDTQHK pc2  
F6SYF8;Q9UBP4**

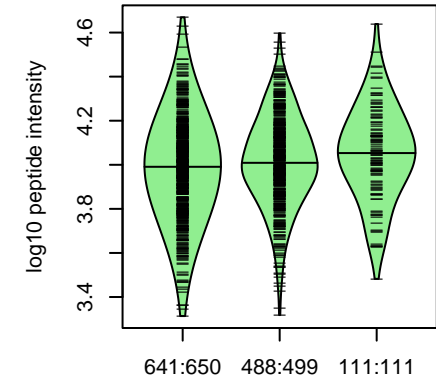

11:12038874:G:A\_A  
p = 0.00037, beta = 0.154, N = 1240

**DKK3 : NP2  
Q9UBP4**

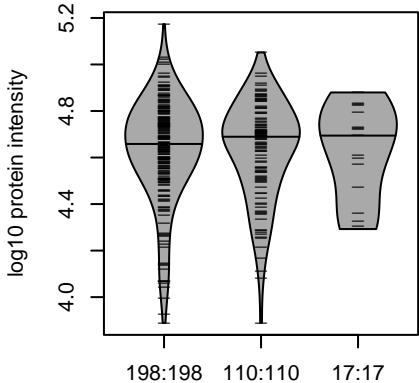

11:12038874:G:A\_A  
p = 0.97, beta = -0.00397, N = 325

**DCQPGLCCAFQR pc2  
F6SYF8;Q9UBP4**

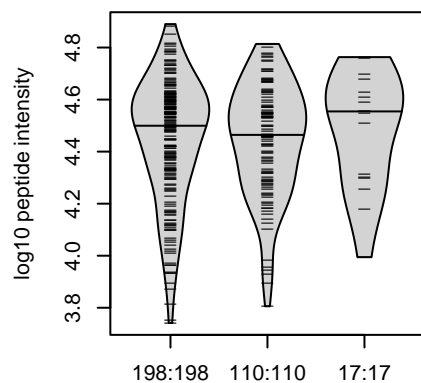

11:12038874:G:A\_A  
p = 0.45, beta = 0.0696, N = 325

**DQDGEILLPR pc2  
F6SYF8;Q9UBP4**

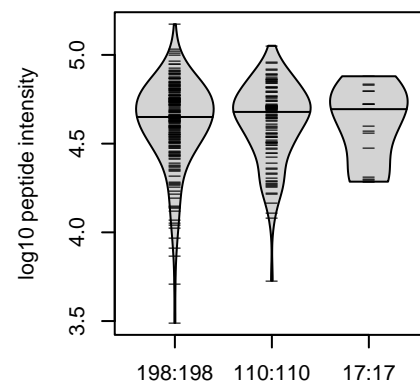

11:12038874:G:A\_A  
p = 0.98, beta = 0.00257, N = 325

**SAVEEMEAEAAAK pc2  
F6SYF8;Q9UBP4**

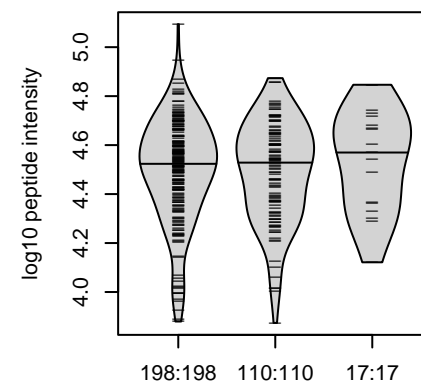

11:12038874:G:A\_A  
p = 0.59, beta = 0.0492, N = 325

**EVEELMEDTQHK pc2  
F6SYF8;Q9UBP4**

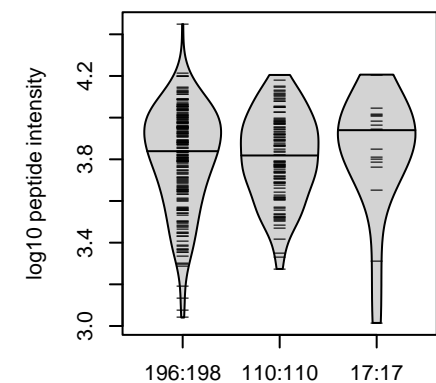

11:12038874:G:A\_A  
p = 0.47, beta = 0.0664, N = 323

**EPAAAAAALLGEEI pc2  
rs3206824 REF**

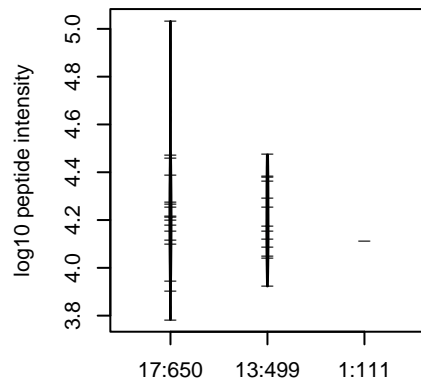

11:12038874:G:A\_A  
p = 0.51, model = DOM, N = 31

**SLTEEMALR pc2  
rs3206824 REF**

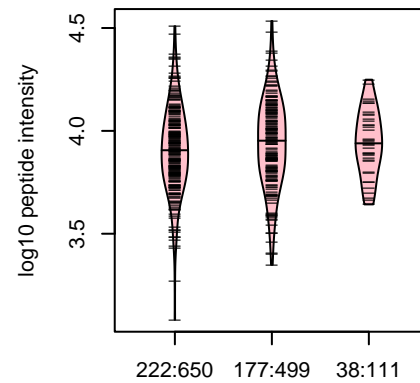

11:12038874:G:A\_A  
p = 0.72, model = REC, N = 437

Assay Target: DKK3  
Olink UniProt: Q9UBP4  
UKB rsID: rs11022114  
Proxy rsID: rs11022114  
UKB SNP: 11:12038874:G:A  
Proxy SNP: 11:12038874:G:A  
UKB log10(p): 712.6  
UKB BETA: 0.363  
\*.\*.\*.\*.\*.\*.\*.\*.\*.\*  
1254:1251:1241:1240:1231:119

**DPT : NP2  
Q07507**

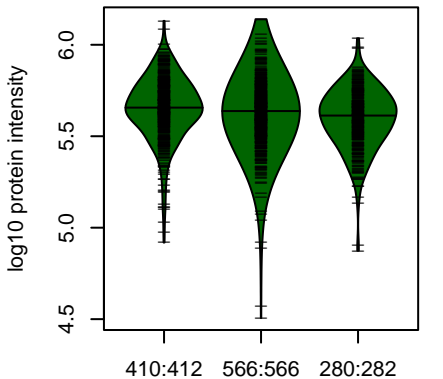

1:168697761:A:C\_A  
p = 3.2e-07, beta = -0.195, N = 1256

**GATTTFAVER pc2  
Q07507**

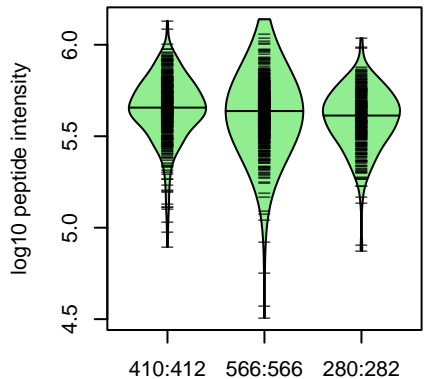

1:168697761:A:C\_A  
p = 3.3e-07, beta = -0.194, N = 1256

**AGMEWYQTCNNGLVAGFQSR pc:  
Q07507**

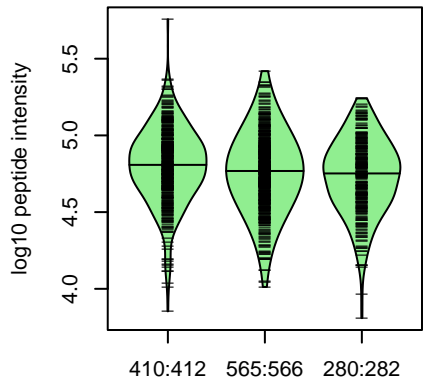

1:168697761:A:C\_A  
p = 0.00089, beta = -0.127, N = 1255

**QGFSYQCPQGQVIVAVR pc3  
Q07507**

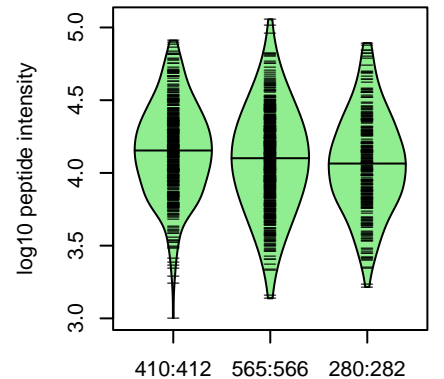

1:168697761:A:C\_A  
p = 0.00049, beta = -0.133, N = 1255

**YFESVLDR pc2  
Q07507**

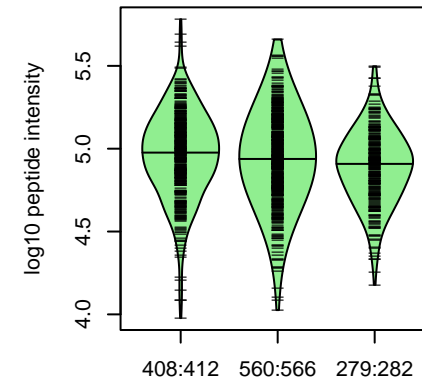

1:168697761:A:C\_A  
p = 0.00059, beta = -0.132, N = 1247

**DPT : NP2  
Q07507**

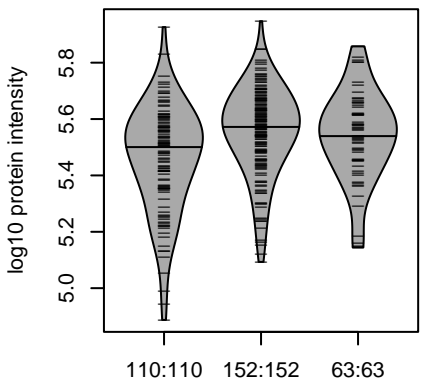

1:168697761:A:C\_C  
p = 0.0023, beta = 0.232, N = 325

**GATTTFAVER pc2  
Q07507**

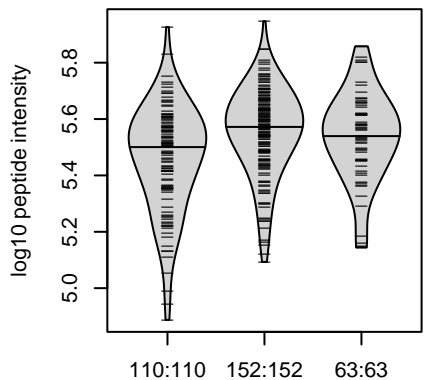

1:168697761:A:C\_C  
p = 0.0023, beta = 0.232, N = 325

**YFESVLDR pc2  
Q07507**

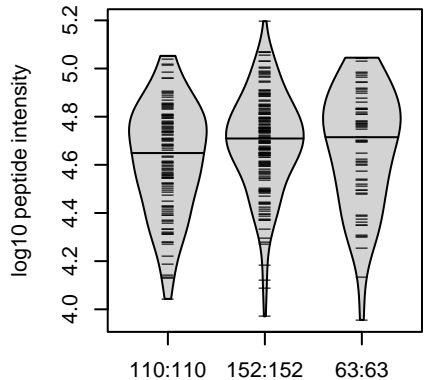

1:168697761:A:C\_C  
p = 0.083, beta = 0.133, N = 325

**QGFSYQCPQGQVIVAVR pc3  
Q07507**

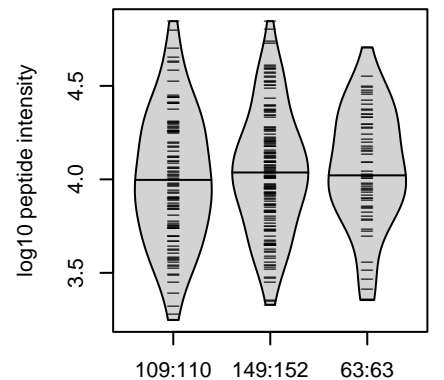

1:168697761:A:C\_C  
p = 0.32, beta = 0.0767, N = 321

**AGMEWYQTCNNGLVAGFQSR pc:  
Q07507**

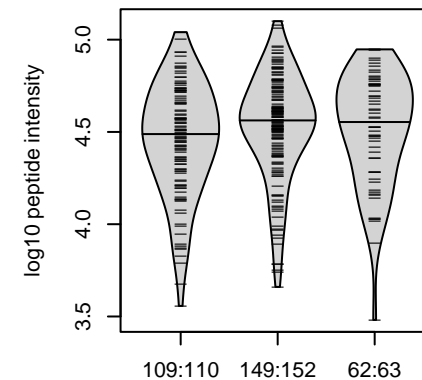

1:168697761:A:C\_C  
p = 0.1, beta = 0.126, N = 320

Assay Target: DPT  
Olink UniProt: Q07507  
UKB rsID: rs1018454  
Proxy rsID: rs1018454  
UKB SNP: 1:168697761:A:C  
Proxy SNP: 1:168697761:A:C  
UKB log10(p): 710.9  
UKB BETA: 0.323  
\*.\*.\*.\*-:-:-:-  
1256:1255:1255:1247:1169:858







**C1QA : NP4  
P02745**

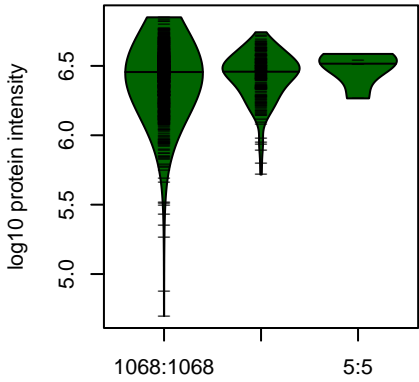

1:22963050:G:A\_A  
p = 0.89, beta = 0.0103, N = 1259

**DQPRPAFSAIR pc2  
P02745**

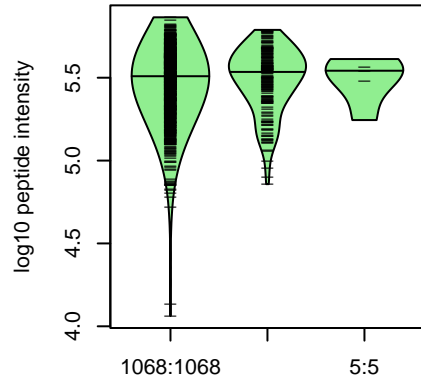

1:22963050:G:A\_A  
p = 0.42, beta = 0.0602, N = 1259

**SLGFCDTTNK pc2  
P02745**

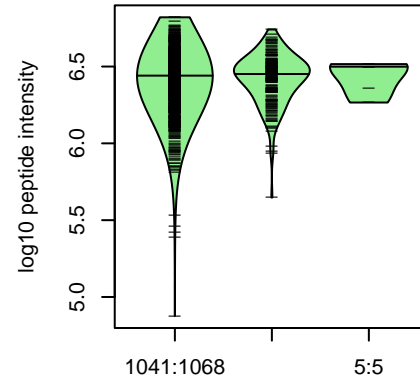

1:22963050:G:A\_A  
p = 0.77, beta = 0.0222, N = 1229

**IPPMGGNVVIFDVTITNQEEPYNHSGGLFQVVSGGMVLQLQQGDQVWVEK  
P02745**

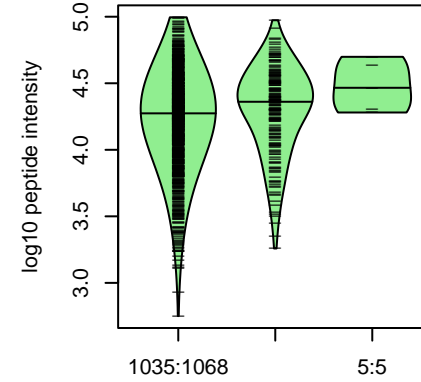

1:22963050:G:A\_A  
p = 0.0061, beta = 0.208, N = 1222

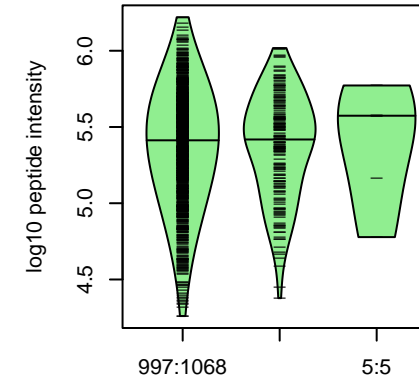

1:22963050:G:A\_A  
p = 0.99, beta = -0.000884, N = 1175

**C1QA : NP4  
P02745**

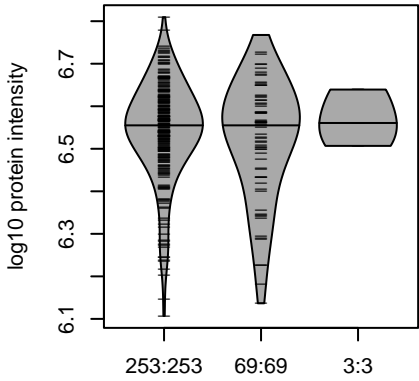

1:22963050:G:A\_A  
p = 0.75, beta = -0.0389, N = 325

**DQPRPAFSAIR pc2  
P02745**

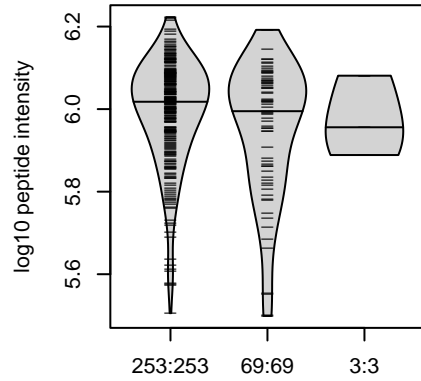

1:22963050:G:A\_A  
p = 0.07, beta = -0.224, N = 325

**GLFQVVSGGMVLQLQQGDQVWVEK |  
P02745**

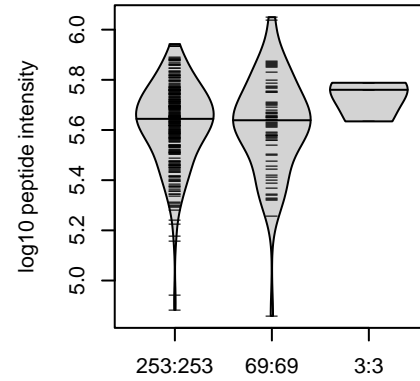

1:22963050:G:A\_A  
p = 0.4, beta = 0.105, N = 325

**SLGFCDTTNK pc2  
P02745**

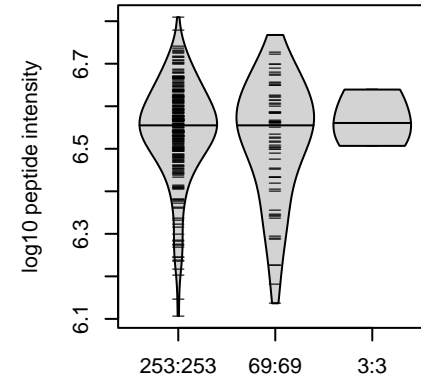

1:22963050:G:A\_A  
p = 0.75, beta = -0.0389, N = 325

**IPPMGGNVVIFDVTITNQEEPYNHSGGLFQVVSGGMVLQLQQGDQVWVEK  
P02745**

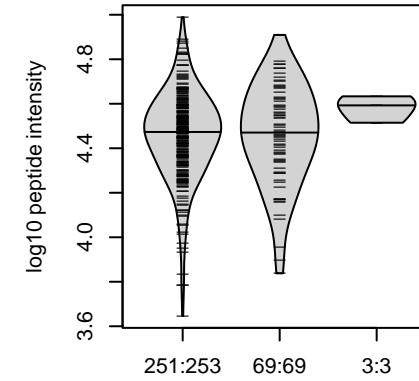

1:22963050:G:A\_A  
p = 0.5, beta = 0.0836, N = 323

Assay Target: C1QA  
Olink UniProt: P02745  
UKB rsID: rs12058824  
Proxy rsID: rs12058824  
UKB SNP: 1:22963050:G:A  
Proxy SNP: 1:22963050:G:A  
UKB log10(p): 696.2  
UKB BETA: -0.621  
-----NA  
1259:1229:1222:1175:1091:108

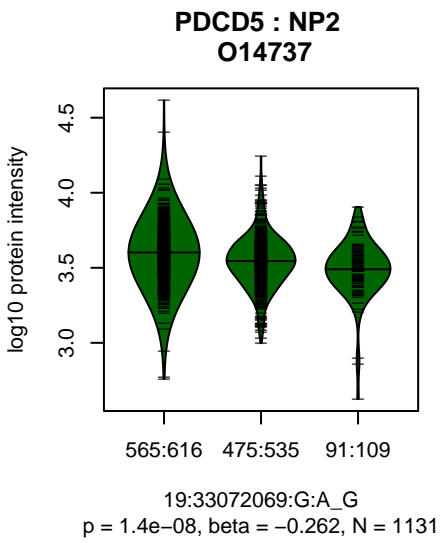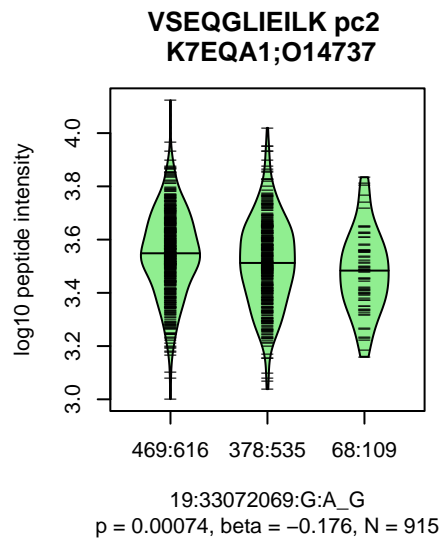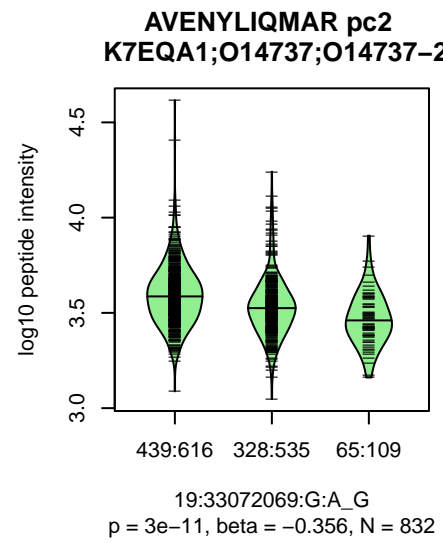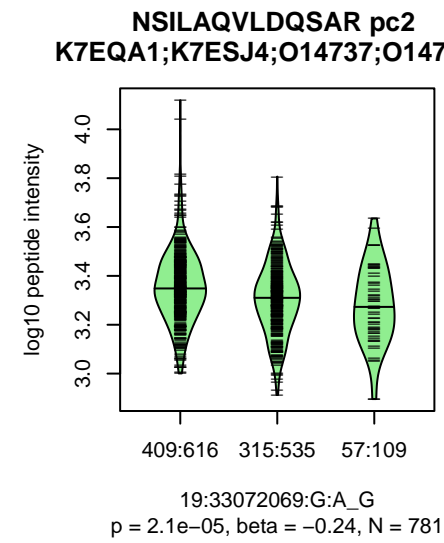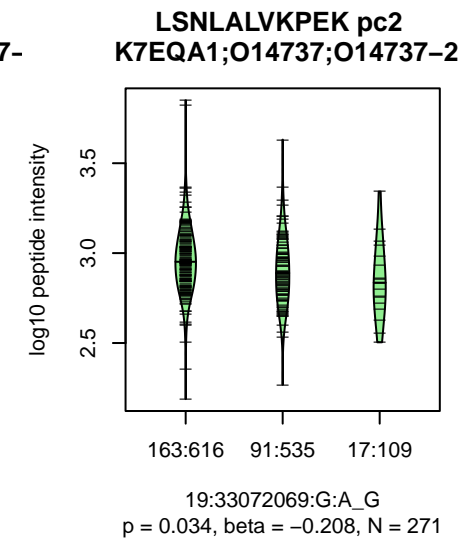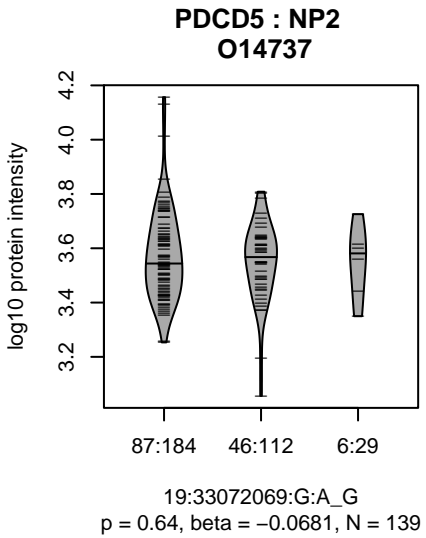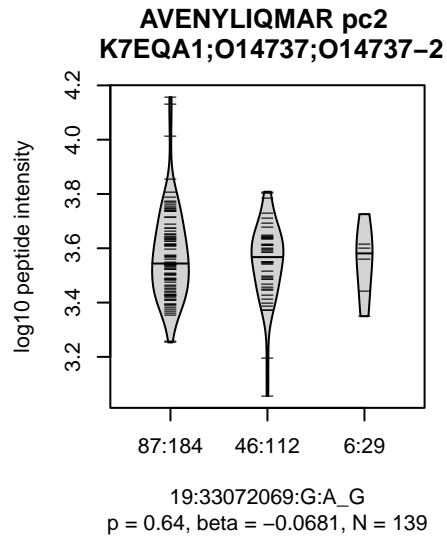

Assay Target: PDCD5  
 Olink UniProt: O14737  
 UKB rsID: rs10402931  
 Proxy rsID: rs10402931  
 UKB SNP: 19:33072069:G:A  
 Proxy SNP: 19:33072069:G:A  
 UKB log10(p): 691.9  
 UKB BETA: 0.376  
 \*.\*.\*.-.-:NA:NA  
 915:832:781:271:121:1:2



**ACP5 : NP3**  
**P13686**

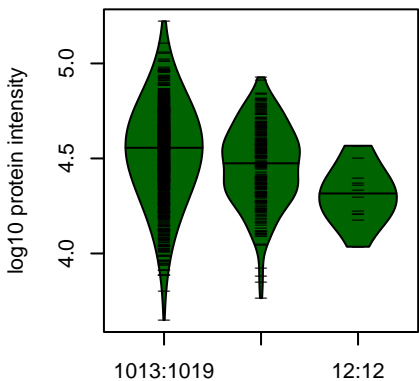

19:11687351:C:T\_T  
p = 2.7e-07, beta = -0.339, N = 1254

**WNFPSPFYR pc2**  
**P13686**

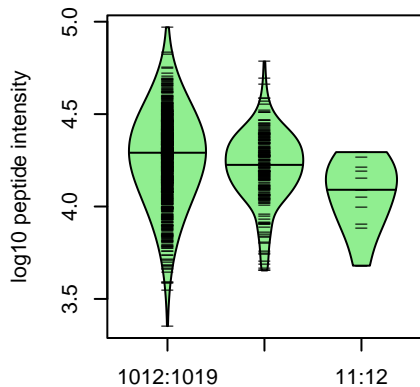

19:11687351:C:T\_T  
p = 8.9e-06, beta = -0.295, N = 1252

**EMTVTYIEASGK pc2**  
**P13686**

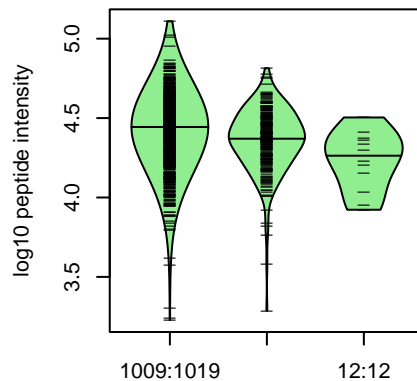

19:11687351:C:T\_T  
p = 3.2e-07, beta = -0.339, N = 1246

**TQLSWLK pc2**  
**P13686**

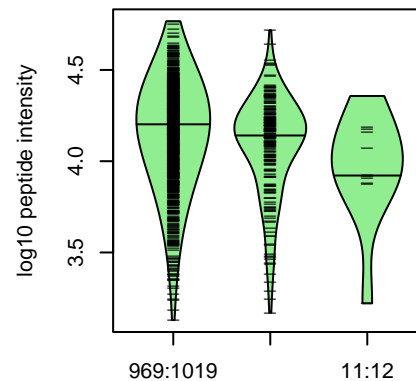

19:11687351:C:T\_T  
p = 9.1e-05, beta = -0.268, N = 1192

**FVAVGDWGGVNPAPFHTAR pc3**  
**P13686**

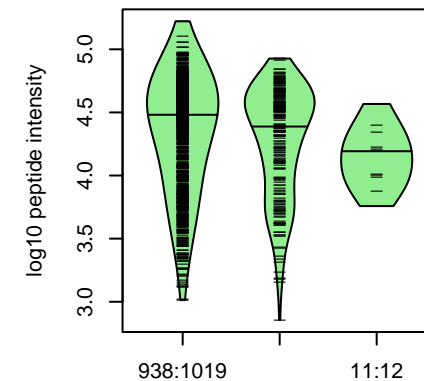

19:11687351:C:T\_T  
p = 0.003, beta = -0.206, N = 1155

**ACP5 : NP3**  
**P13686**

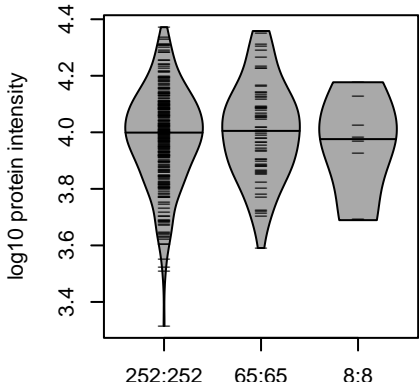

19:11687351:C:T\_T  
p = 0.68, beta = 0.0469, N = 325

**FVAVGDWGGVNPAPFHTAR pc3**  
**P13686**

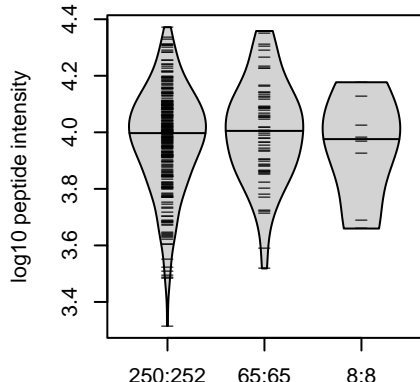

19:11687351:C:T\_T  
p = 0.61, beta = 0.0583, N = 323

**EMTVTYIEASGK pc2**  
**P13686**

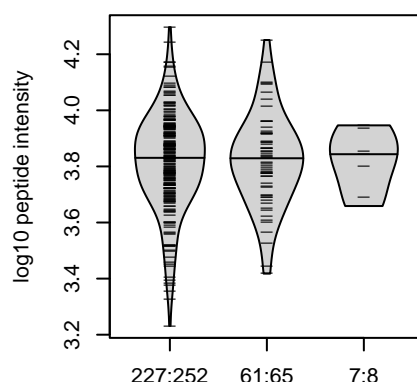

19:11687351:C:T\_T  
p = 0.97, beta = -0.0048, N = 295

**WNFPSPFYR pc2**  
**P13686**

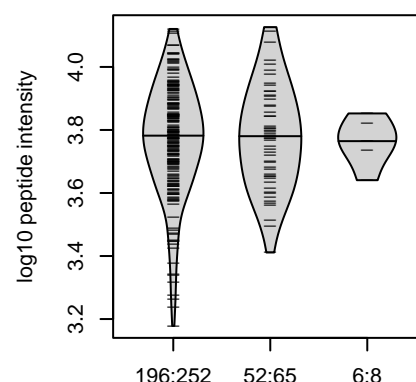

19:11687351:C:T\_T  
p = 0.81, beta = -0.031, N = 254

**TQLSWLK pc2**  
**P13686**

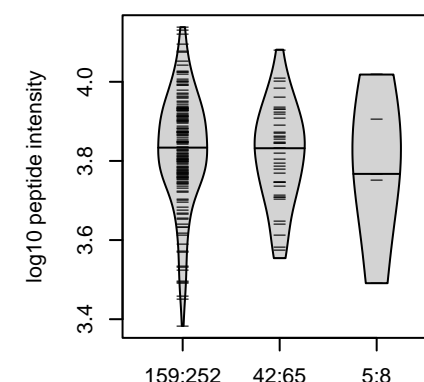

19:11687351:C:T\_T  
p = 0.35, beta = -0.131, N = 206

**EDYVLVAGHYPVWSIAEHGPTHCLVK |**  
**rs2229531 REF**

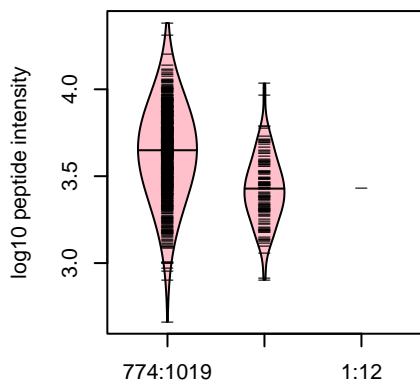

19:11687351:C:T\_T  
p = 3.6e-15, model = REC, N = 893

Assay Target: ACP5  
Olink UniProt: P13686  
UKB rsID: rs2305799  
Proxy rsID: rs2305799  
UKB SNP: 19:11687351:C:T  
Proxy SNP: 19:11687351:C:T  
UKB log10(p): 679.9  
UKB BETA: -0.501  
\*.\*.\*.\*.\*-  
1252:1246:1192:1155:696:525

**PTPRB : NP4**  
**P23467-3**

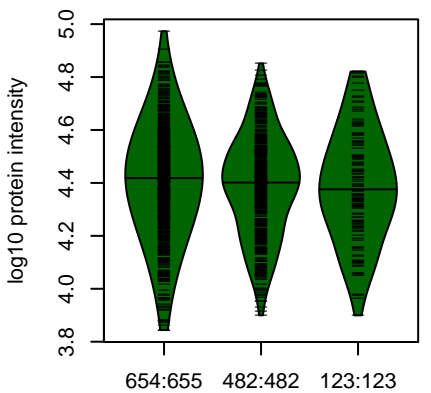

12:70990054:T:C\_C  
p = 0.32, beta = -0.0424, N = 1259

**VLAPWITETHFK pc3**  
**5;F8VU56;P23467;P23467-2;P23467-3**

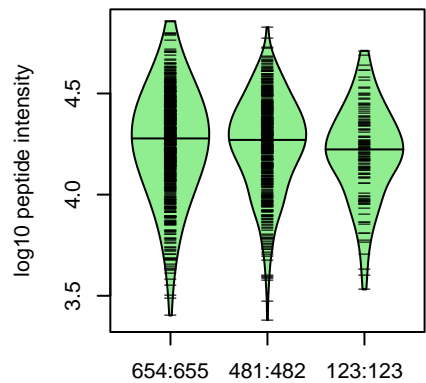

12:70990054:T:C\_C  
p = 0.042, beta = -0.0861, N = 1258

**SALCLAISNSSR pc2**  
**F8VSD5;F8VU56;P23467-3**

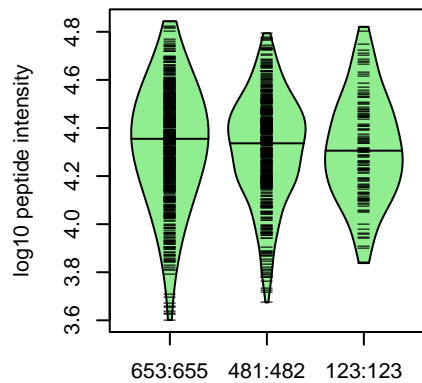

12:70990054:T:C\_C  
p = 0.37, beta = -0.0383, N = 1257

**TVPLAVLQLR pc2**  
**8VSD5;F8VU56;P23467;P23467-3;P235;F8VU56;P23467;P23467-2;P23467-3**

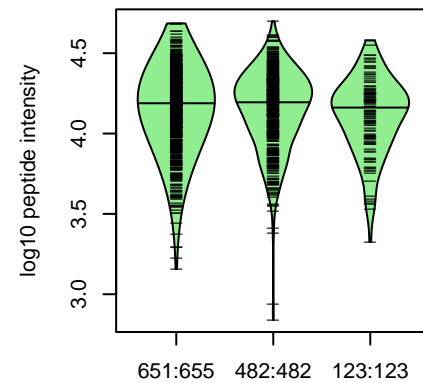

12:70990054:T:C\_C  
p = 0.11, beta = -0.0673, N = 1256

**YMATVTSISGDLK pc2**  
**5;F8VU56;P23467;P23467-2;P23467-3**

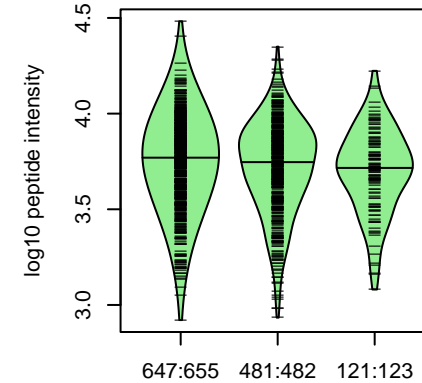

12:70990054:T:C\_C  
p = 0.019, beta = -0.0997, N = 1249

**PTPRB : NP4**  
**P23467-3**

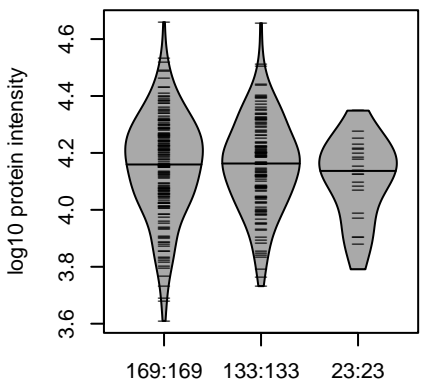

12:70990054:T:C\_C  
p = 0.56, beta = -0.0507, N = 325

**SALCLAISNSSR pc2**  
**F8VSD5;F8VU56;P23467-3**

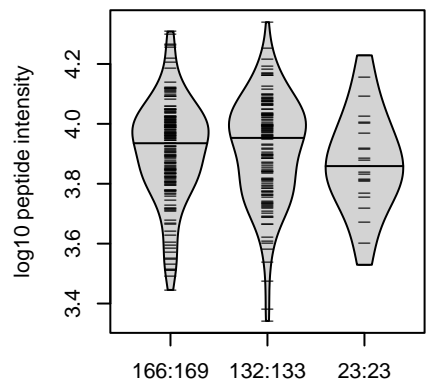

12:70990054:T:C\_C  
p = 0.75, beta = -0.0277, N = 321

**YNIATAVSGGK pc2**  
**5;F8VU56;P23467;P23467-2;P23467-5;F8VU56;P23467;P23467-2;P23467-5;F8VU56;P23467;P23467-2;P23467-5**

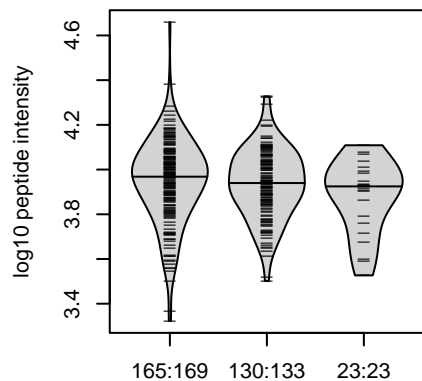

12:70990054:T:C\_C  
p = 0.12, beta = -0.138, N = 318

**TVVLQTDPLPPAR pc2**  
**5;F8VU56;P23467;P23467-2;P23467-5;F8VU56;P23467;P23467-2;P23467-5**

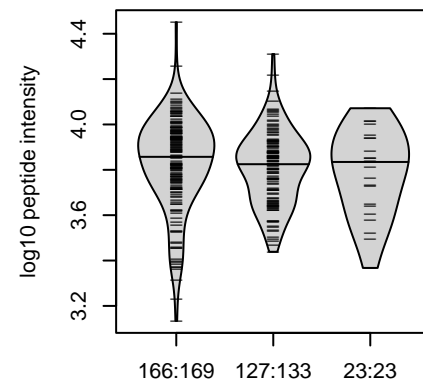

12:70990054:T:C\_C  
p = 0.15, beta = -0.129, N = 316

**YIISLADRDLIIHK pc3**  
**5;F8VU56;P23467;P23467-2;P23467-3**

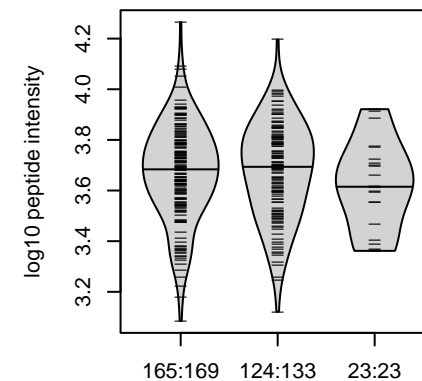

12:70990054:T:C\_C  
p = 0.51, beta = -0.059, N = 312

**TIQNQQWMWTENEK pc2**  
**rs2584021 ALT**

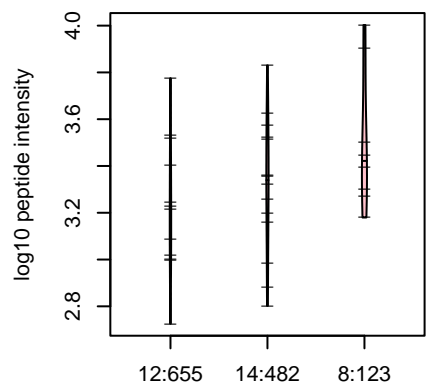

12:70990054:T:C\_C  
p = 0.013, model = DOM, N = 34

**TIQNQQWMWTEDEK pc2**  
**rs2584021 REF**

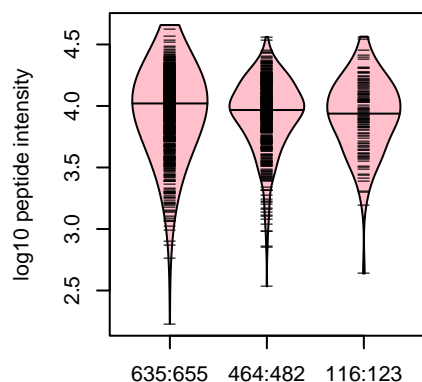

12:70990054:T:C\_C  
p = 0.2, model = DOM, N = 1215

Assay Target: PTPRB  
Olink UniProt: P23467  
UKB rsID: rs2465811  
Proxy rsID: rs2465811  
UKB SNP: 12:70990054:T:C  
Proxy SNP: 12:70990054:T:C  
UKB log10(p): 658.4  
UKB BETA: -0.354  
-----\*-----  
1258:1257:1256:1249:1245:124



**TFPI : NP4  
P10646**

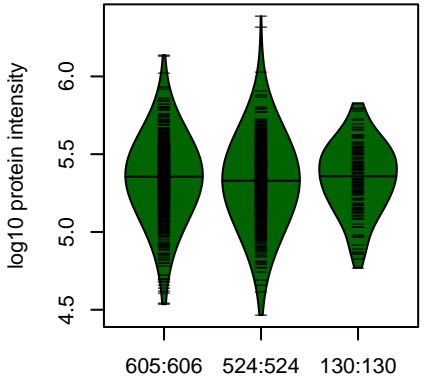

2:188343781:G:A\_A  
p = 0.56, beta = -0.0248, N = 1259

**IAYEEIFVK pc2  
P10646**

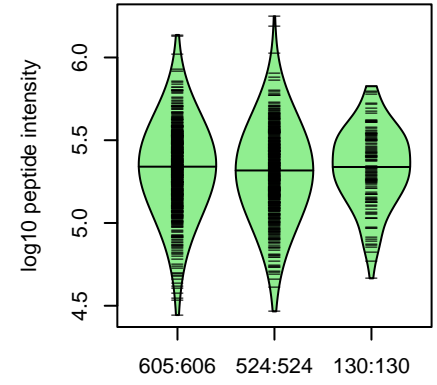

2:188343781:G:A\_A  
p = 0.61, beta = -0.0215, N = 1259

**YSGCGNENNFTSK pc2  
P10646**

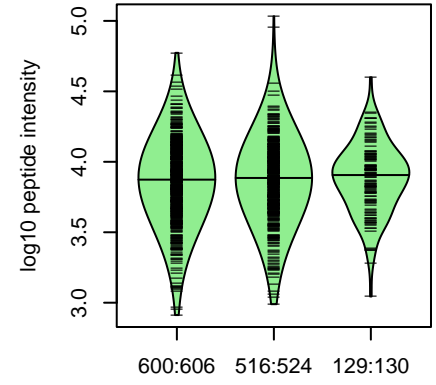

2:188343781:G:A\_A  
p = 0.67, beta = 0.0183, N = 1245

**FESLEECK pc2  
P10646;P10646-2**

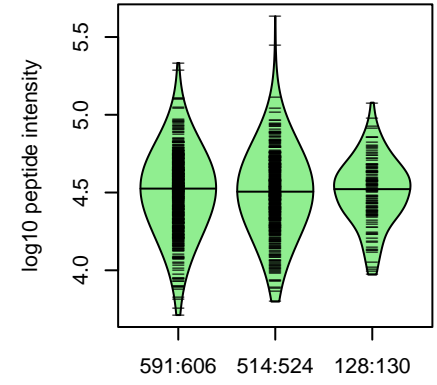

2:188343781:G:A\_A  
p = 0.95, beta = -0.00277, N = 1233

**FYYNSVIGK pc2  
P10646**

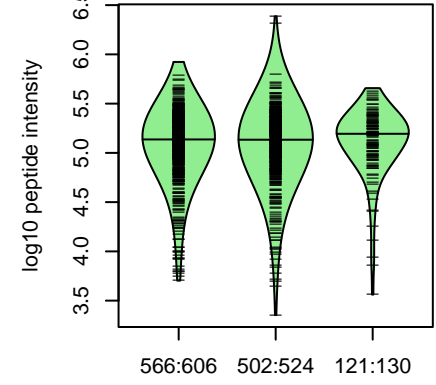

2:188343781:G:A\_A  
p = 0.64, beta = 0.0206, N = 1189

**TFPI : NP4  
P10646**

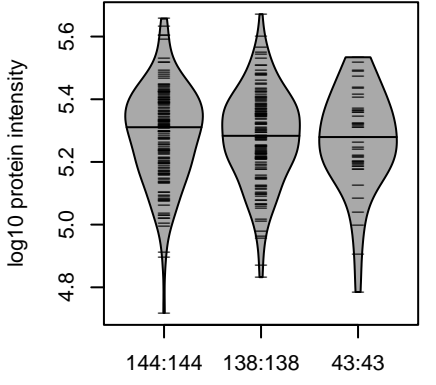

2:188343781:G:A\_A  
p = 0.61, beta = -0.0399, N = 325

**IAYEEIFVK pc2  
P10646**

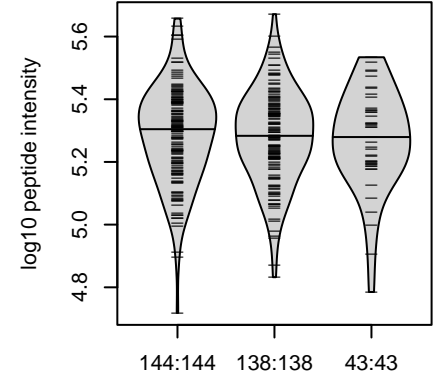

2:188343781:G:A\_A  
p = 0.69, beta = -0.0318, N = 325

**PDFCFLEEDPGICR pc2  
P10646;P10646-2**

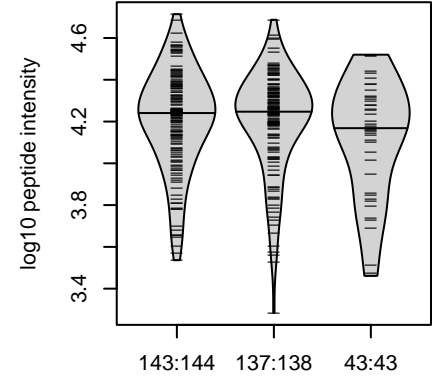

2:188343781:G:A\_A  
p = 0.16, beta = -0.111, N = 323

**FESLEECK pc2  
P10646;P10646-2**

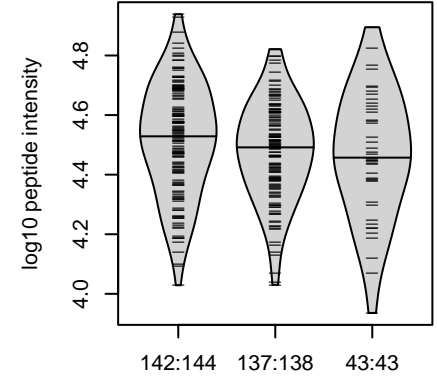

2:188343781:G:A\_A  
p = 0.066, beta = -0.146, N = 322

**YSGCGNENNFTSK pc2  
P10646**

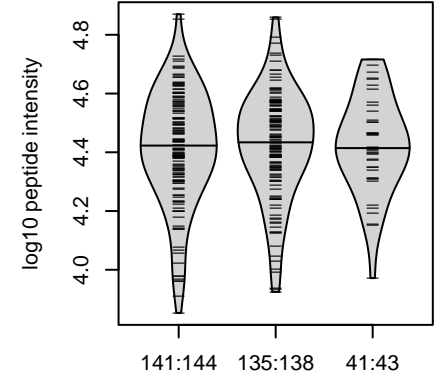

2:188343781:G:A\_A  
p = 0.72, beta = 0.0289, N = 317

Assay Target: TFPI  
Olink UniProt: P10646  
UKB rsID: rs7576066  
Proxy rsID: rs7576066  
UKB SNP: 2:188343781:G:A  
Proxy SNP: 2:188343781:G:A  
UKB log10(p): 643.7  
UKB BETA: 0.35  
-----NA  
1259:1245:1233:1189:1173:107

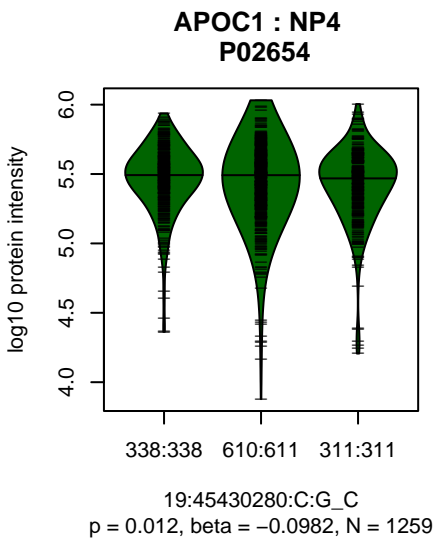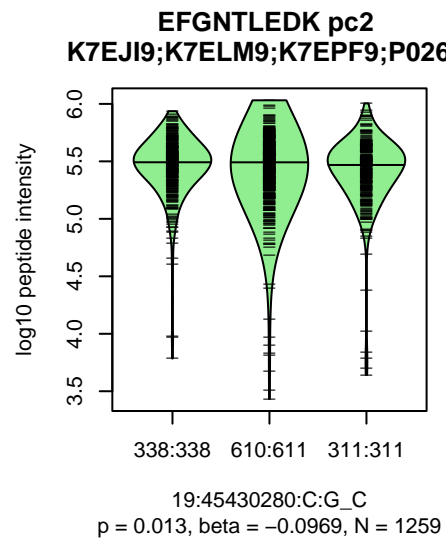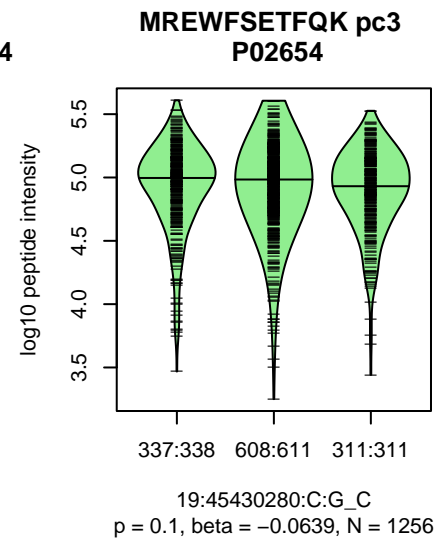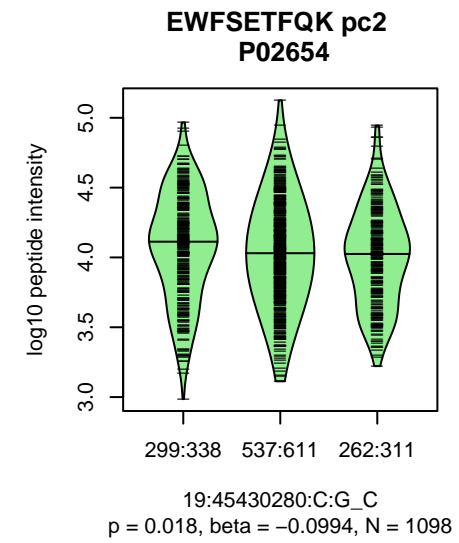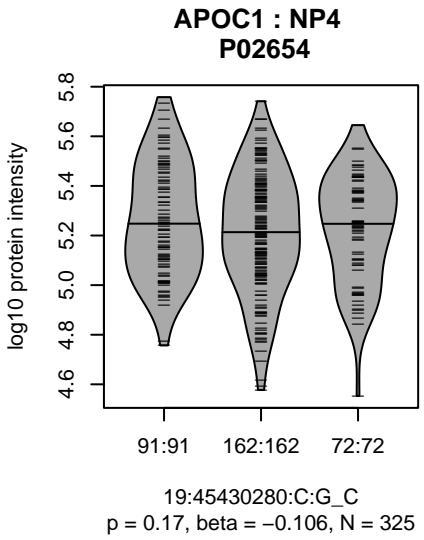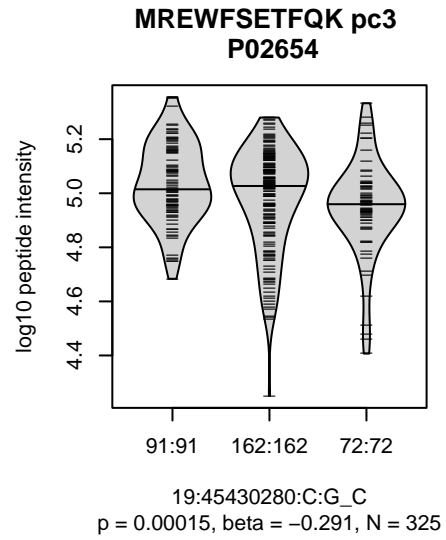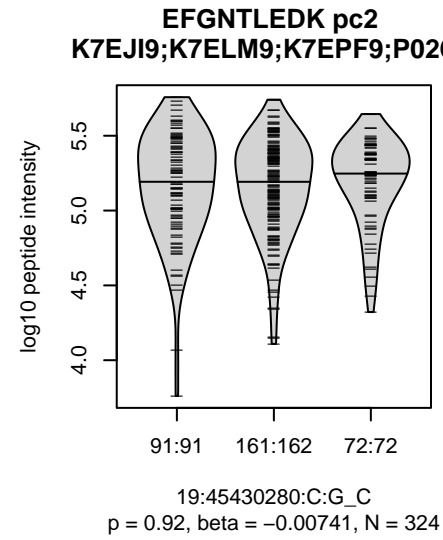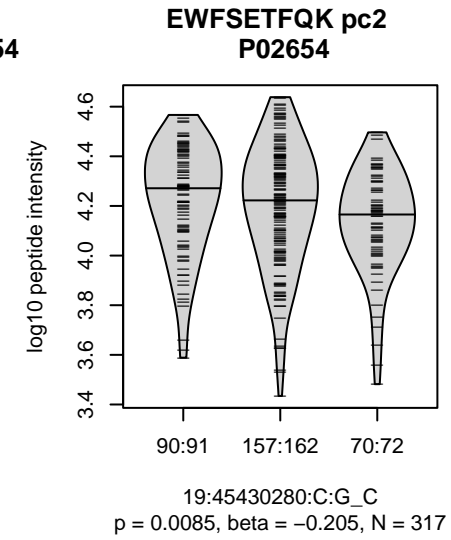

Assay Target: APOC1  
 Olink UniProt: P02654  
 UKB rsID: rs5112  
 Proxy rsID: rs5112  
 UKB SNP: 19:45430280:C:G  
 Proxy SNP: 19:45430280:C:G  
 UKB log<sub>10</sub>(p): 624.8  
 UKB BETA: 0.333  
 -: -: -: :NA:NA:NA:NA  
 1259:1256:1143:1098:6:7:4:10



**GPC1 : NP2  
P35052**

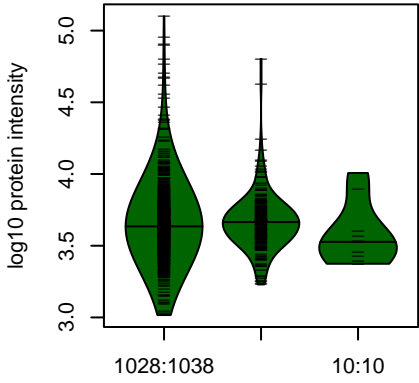

2:241405864:C:T\_T  
p = 0.7, beta = 0.0263, N = 1247

**SFVQQLGVASDVVR pc2  
H7C410;P35052**

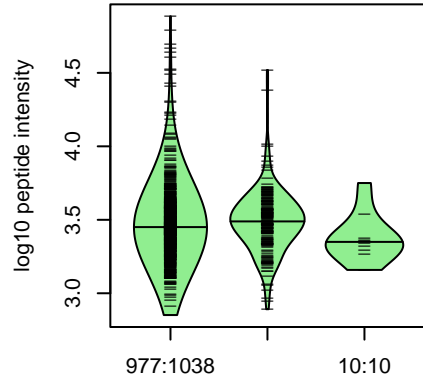

2:241405864:C:T\_T  
p = 0.44, beta = 0.0546, N = 1190

**GFSLSDVPQAEISGEHLR pc3  
P35052**

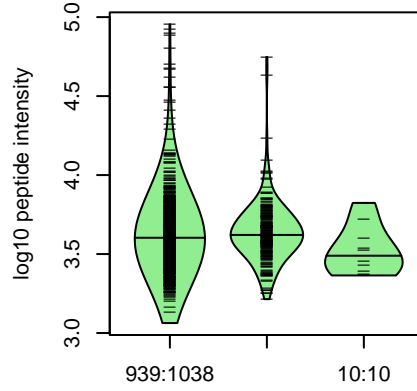

2:241405864:C:T\_T  
p = 0.51, beta = 0.0466, N = 1147

**MALSTASDDR pc2  
H7C410;P35052**

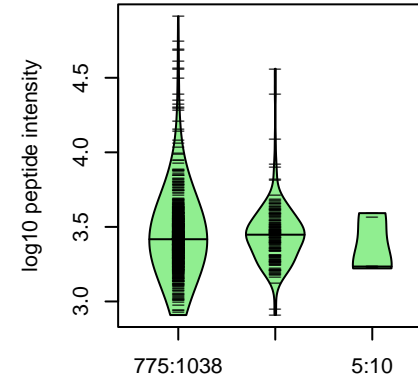

2:241405864:C:T\_T  
p = 0.62, beta = 0.0404, N = 940

**VLQAMLATQLR pc2  
H7C410;P35052**

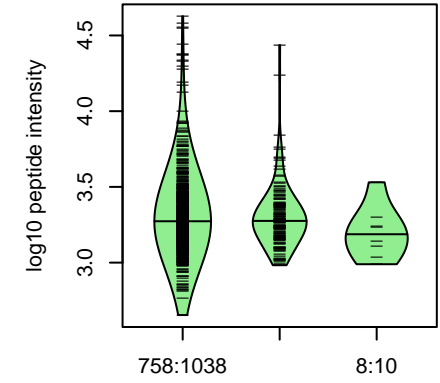

2:241405864:C:T\_T  
p = 0.51, beta = -0.0541, N = 913

**GPC1 : NP2  
P35052**

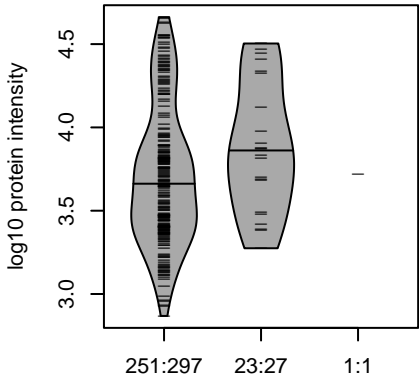

2:241405864:C:T\_T  
p = 0.054, beta = 0.382, N = 275

**SFVQQLGVASDVVR pc2  
H7C410;P35052**

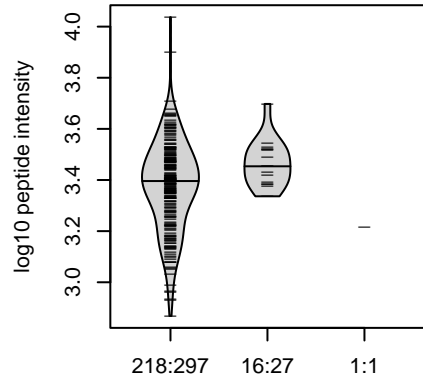

2:241405864:C:T\_T  
p = 0.25, beta = 0.261, N = 235

**GFSLSDVPQAEISGEHLR pc3  
P35052**

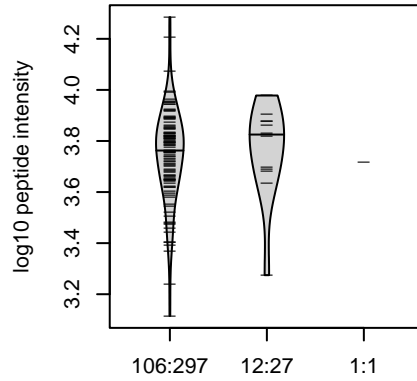

2:241405864:C:T\_T  
p = 0.38, beta = 0.224, N = 119

**VAQVPLGPECSR pc2  
H7C410;P35052**

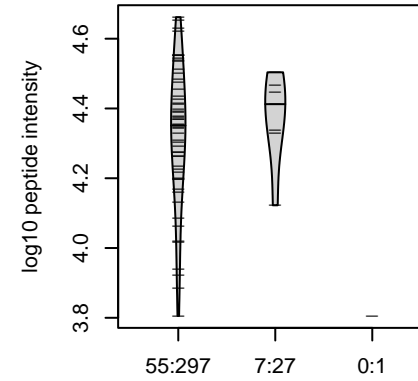

2:241405864:C:T\_T  
p = 0.93, beta = 0.0354, N = 62

Assay Target: GPC1  
Olink UniProt: P35052  
UKB rsID: rs11892254  
Proxy rsID: rs11892254  
UKB SNP: 2:241405864:C:T  
Proxy SNP: 2:241405864:C:T  
UKB log10(p): 624.6  
UKB BETA: 0.5  
-----NA:NA  
1190:1147:940:913:582:472:319

**GLO1 : NP2  
Q04760**

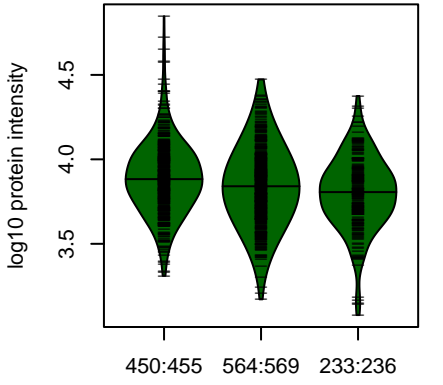

6:38650628:T:G\_G  
p = 4.6e-07, beta = -0.197, N = 1247

**DFLQQTMLR pc2  
Q04760**

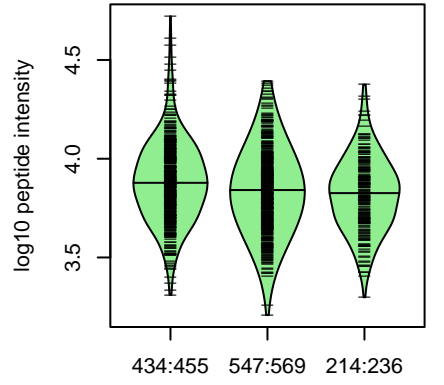

6:38650628:T:G\_G  
p = 7.8e-05, beta = -0.159, N = 1195

**VLGMTLIQK pc2  
Q04760**

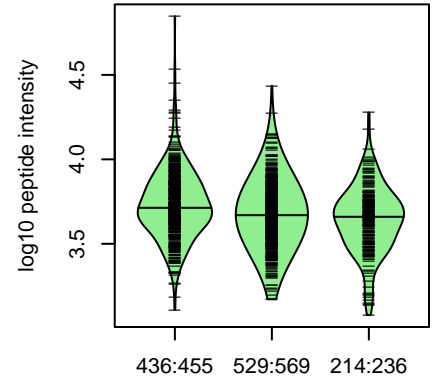

6:38650628:T:G\_G  
p = 2.9e-08, beta = -0.223, N = 1179

**GFGHIGIAPDVYSACK pc3  
Q04760**

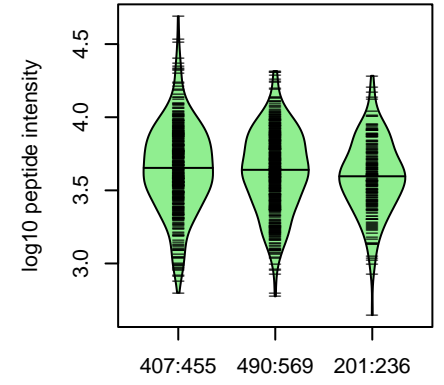

6:38650628:T:G\_G  
p = 0.012, beta = -0.104, N = 1098

**IAWALSR pc2  
Q04760**

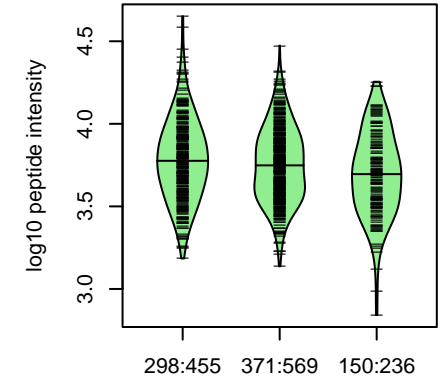

6:38650628:T:G\_G  
p = 0.00034, beta = -0.173, N = 819

**GLO1 : NP2  
Q04760**

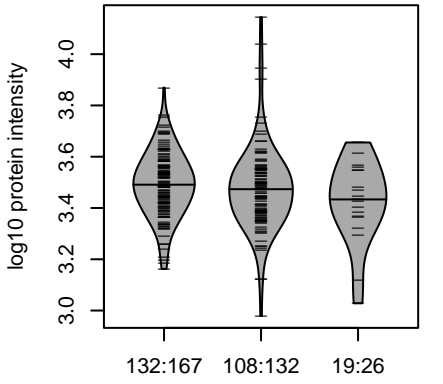

6:38650628:T:G\_G  
p = 0.045, beta = -0.196, N = 259

**GFGHIGIAPDVYSACK pc3  
Q04760**

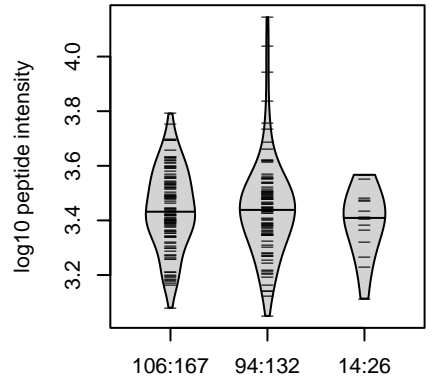

6:38650628:T:G\_G  
p = 0.32, beta = -0.108, N = 214

**DFLLQQTMLR pc2  
Q04760**

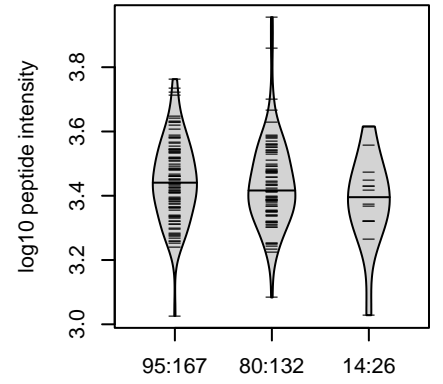

6:38650628:T:G\_G  
p = 0.27, beta = -0.126, N = 189

**VLGMTLIQK pc2  
Q04760**

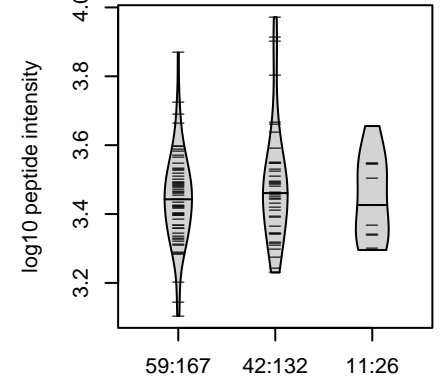

6:38650628:T:G\_G  
p = 0.95, beta = 0.00908, N = 112

**FSLYFLAYEDK pc2  
Q04760**

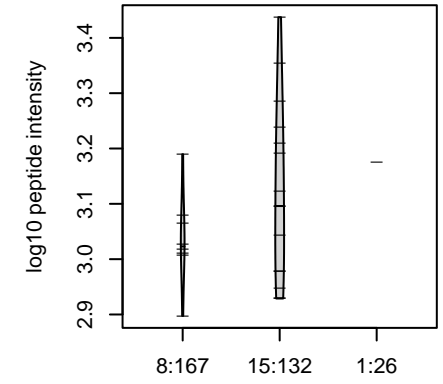

6:38650628:T:G\_G  
p = 0.11, beta = 0.55, N = 24

Assay Target: GLO1  
Olink UniProt: Q04760  
UKB rsID: rs4746  
Proxy rsID: rs4746  
UKB SNP: 6:38650628:T:G  
Proxy SNP: 6:38650628:T:G  
UKB log10(p): 616.9  
UKB BETA: -0.326  
\*.\*-.\*-.\*-.\*-.\*-  
1195:1179:1098:819:650:199:18



**PCDH12 : NP2  
Q9NPG4**

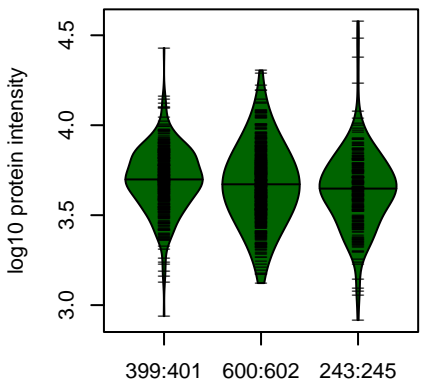

5:141336264:G:T\_G  
p = 1e-04, beta = -0.154, N = 1242

**YQVSEEVPSGTIVIGK pc2  
Q9NPG4**

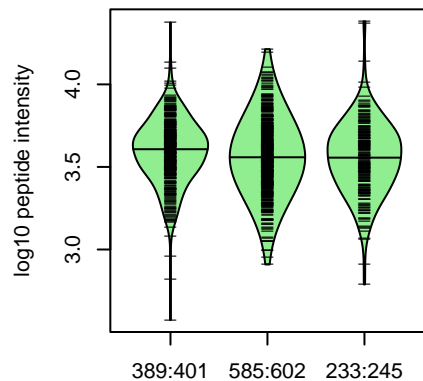

5:141336264:G:T\_G  
p = 0.015, beta = -0.0983, N = 1207

**ENNLPSSLHLITIK pc3  
Q9NPG4**

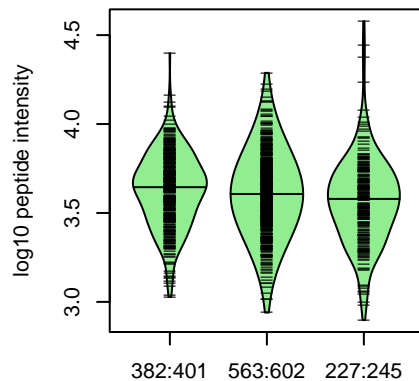

5:141336264:G:T\_G  
p = 4e-04, beta = -0.145, N = 1172

**NPAYEVDVQAR pc2  
Q9NPG4**

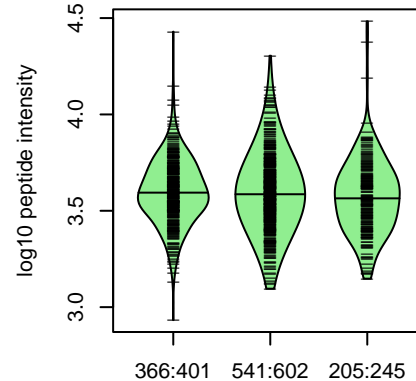

5:141336264:G:T\_G  
p = 0.053, beta = -0.0821, N = 1112

**YTLTLLAQDQGLQPLSAK pc2  
Q9NPG4**

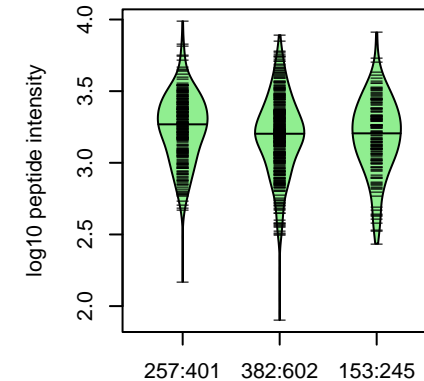

5:141336264:G:T\_G  
p = 0.02, beta = -0.116, N = 792

**PCDH12 : NP2  
Q9NPG4**

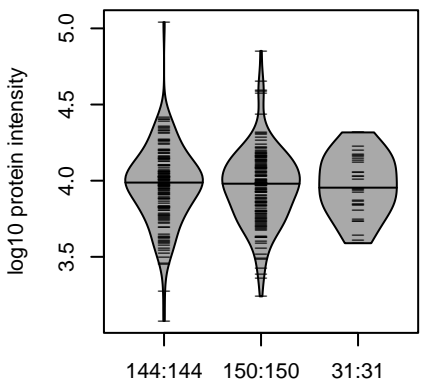

5:141336264:G:T\_G  
p = 0.61, beta = -0.0428, N = 325

**ENNLPSSLHLITIK pc3  
Q9NPG4**

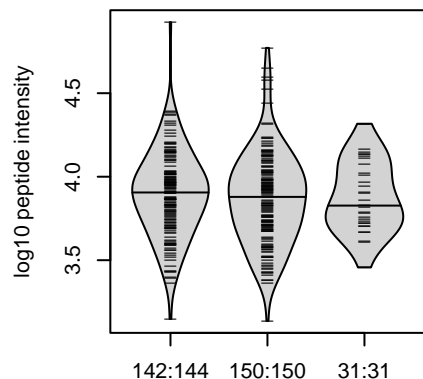

5:141336264:G:T\_G  
p = 0.37, beta = -0.0766, N = 323

**YQVSEEVPSGTIVIGK pc2  
Q9NPG4**

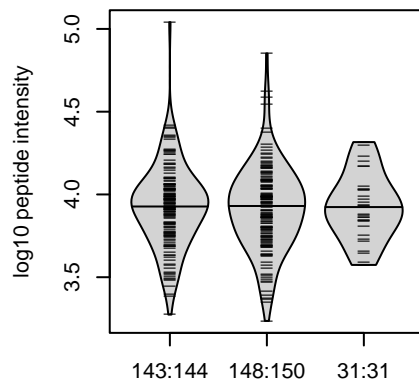

5:141336264:G:T\_G  
p = 0.63, beta = -0.0404, N = 322

**YTLTLLAQDQGLQPLSAK pc2  
Q9NPG4**

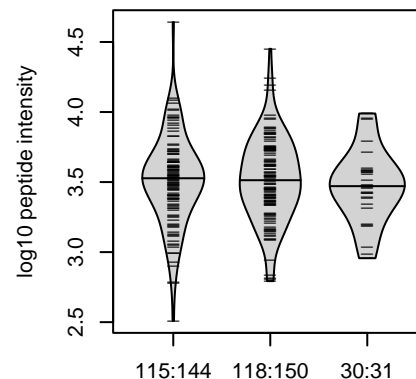

5:141336264:G:T\_G  
p = 0.55, beta = -0.0541, N = 263

**NPAYEVDVQAR pc2  
Q9NPG4**

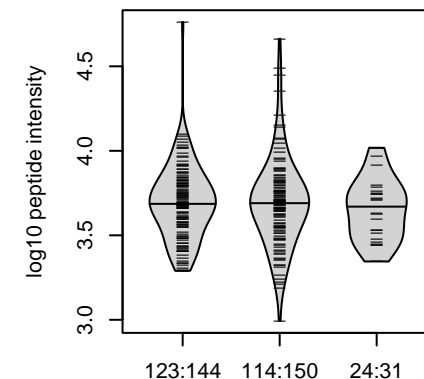

5:141336264:G:T\_G  
p = 0.48, beta = -0.0662, N = 261

Assay Target: PCDH12  
Olink UniProt: Q9NPG4  
UKB rsID: rs164075  
Proxy rsID: rs164075  
UKB SNP: 5:141336264:G:T  
Proxy SNP: 5:141336264:G:T  
UKB log10(p): 600.4  
UKB BETA: 0.325  
- - \* - - - \* - - - -  
1207:1172:1112:792:756:687:687



**TF : NP4  
P02787**

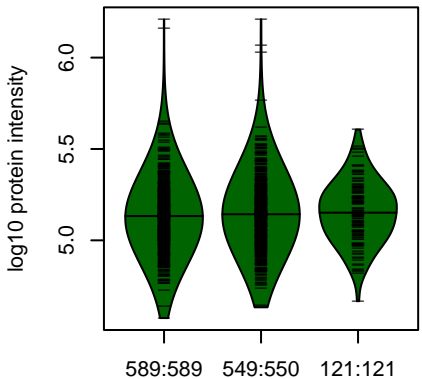

3:133479230:A:G\_G  
p = 0.078, beta = 0.0759, N = 1259

**CSTSSLLEACTFR pc2  
P02787**

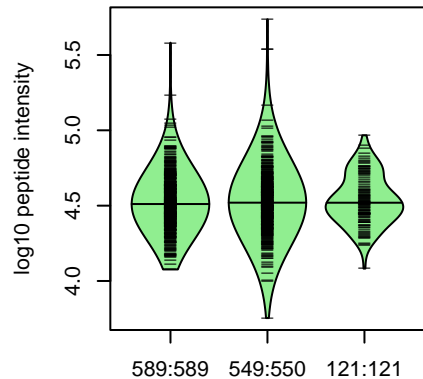

3:133479230:A:G\_G  
p = 0.28, beta = 0.0465, N = 1259

**DCHLAQVPSHTVVAR pc3  
P02787**

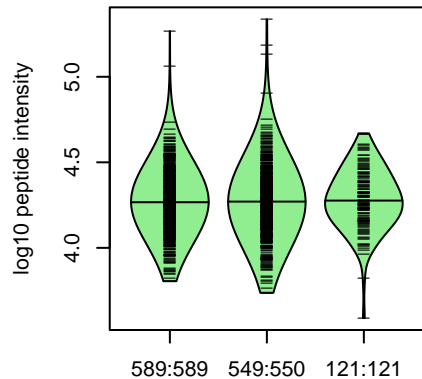

3:133479230:A:G\_G  
p = 0.48, beta = 0.0302, N = 1259

**DLLFRDDTVCLAK pc3  
P02787**

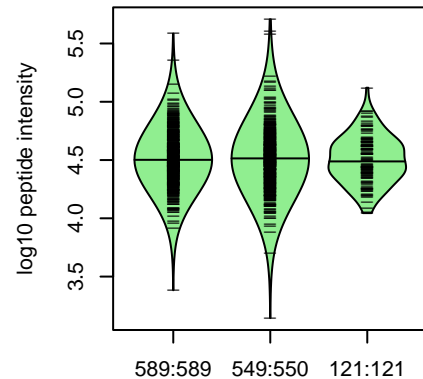

3:133479230:A:G\_G  
p = 1, beta = 4.76e-05, N = 1259

**DSGFQMNQLR pc2  
P02787**

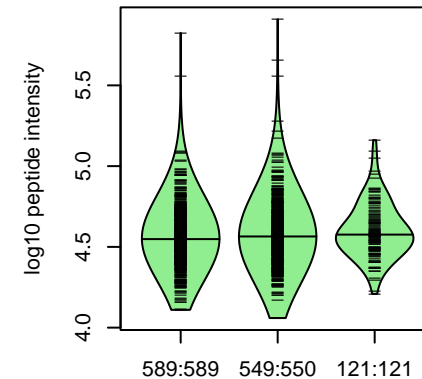

3:133479230:A:G\_G  
p = 0.022, beta = 0.0987, N = 1259

**TF : NP4  
P02787**

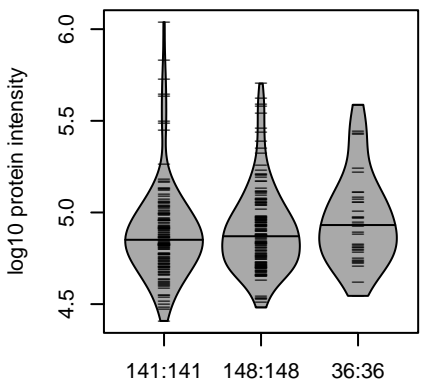

3:133479230:A:G\_G  
p = 0.58, beta = 0.0453, N = 325

**CSTSSLLEACTFR pc2  
P02787**

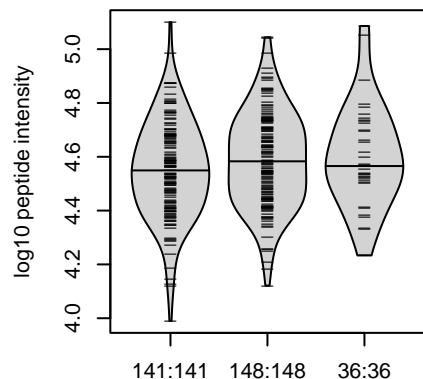

3:133479230:A:G\_G  
p = 0.25, beta = 0.0956, N = 325

**DCHLAQVPSHTVVAR pc3  
P02787**

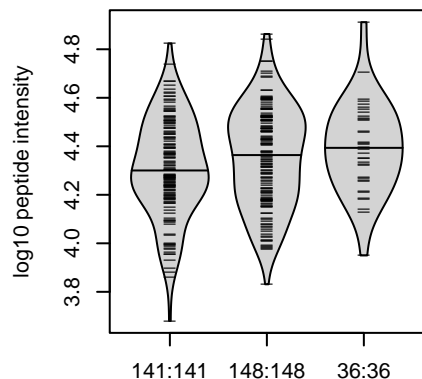

3:133479230:A:G\_G  
p = 0.046, beta = 0.164, N = 325

**EFQLFSSPHGK pc2  
P02787**

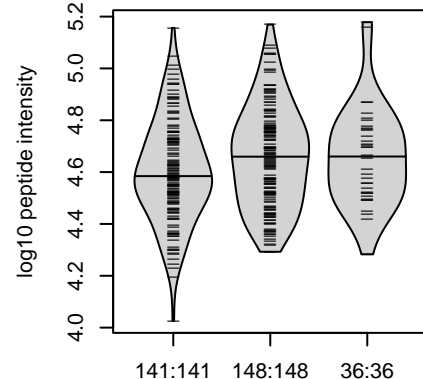

3:133479230:A:G\_G  
p = 0.1, beta = 0.135, N = 325

**FDEFFSEGCAPGSK pc2  
P02787**

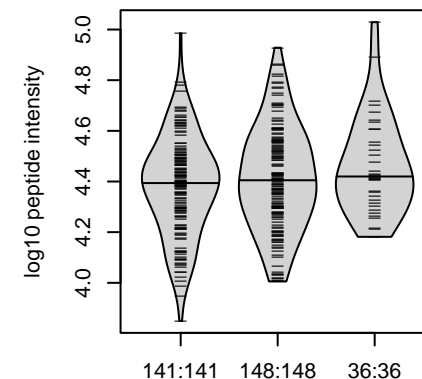

3:133479230:A:G\_G  
p = 0.066, beta = 0.151, N = 325

Assay Target: TF  
Olink UniProt: P02787  
UKB rsID: rs8177245  
Proxy rsID: rs8177245  
UKB SNP: 3:133479230:A:G  
Proxy SNP: 3:133479230:A:G  
UKB log10(p): 570.5  
UKB BETA: 0.329  
-----\*-----  
1259:1259:1259:1259:1259:125

**SVEEYANCHLAR pc2  
rs1049296 ALT**

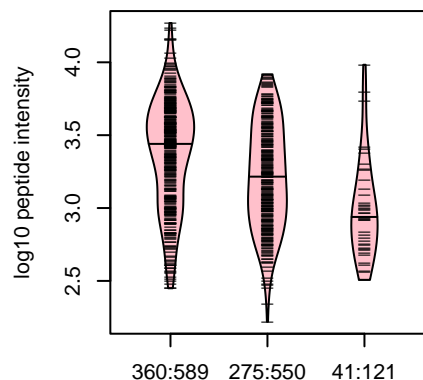

3:133479230:A:G\_G  
p = 6.3e-07, model = REC, N = 676

**SVEEYANCHLAR pc3  
rs1049296 ALT**

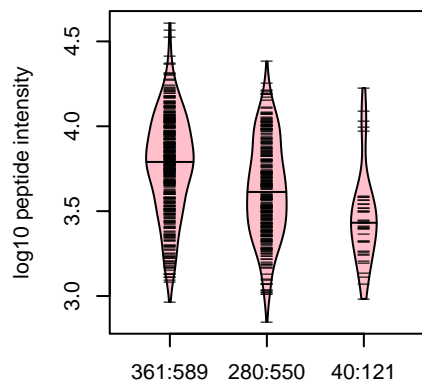

3:133479230:A:G\_G  
p = 1.2e-06, model = DOM, N = 681

**PVEEYANCHLAR pc3  
rs1049296 REF**

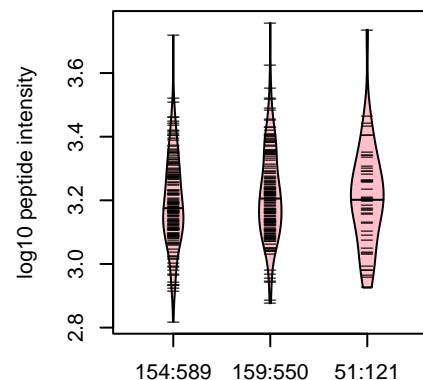

3:133479230:A:G\_G  
p = 0.001, model = DOM, N = 364

**PVEEYANCHLAR pc2  
rs1049296 REF**

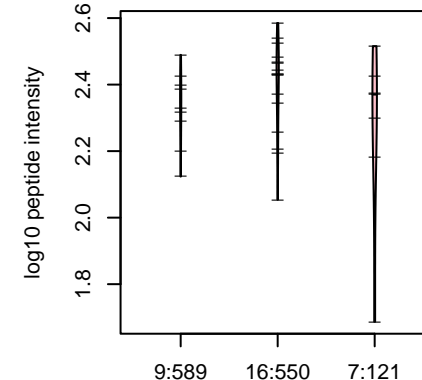

3:133479230:A:G\_G  
p = 0.028, model = DOM, N = 32







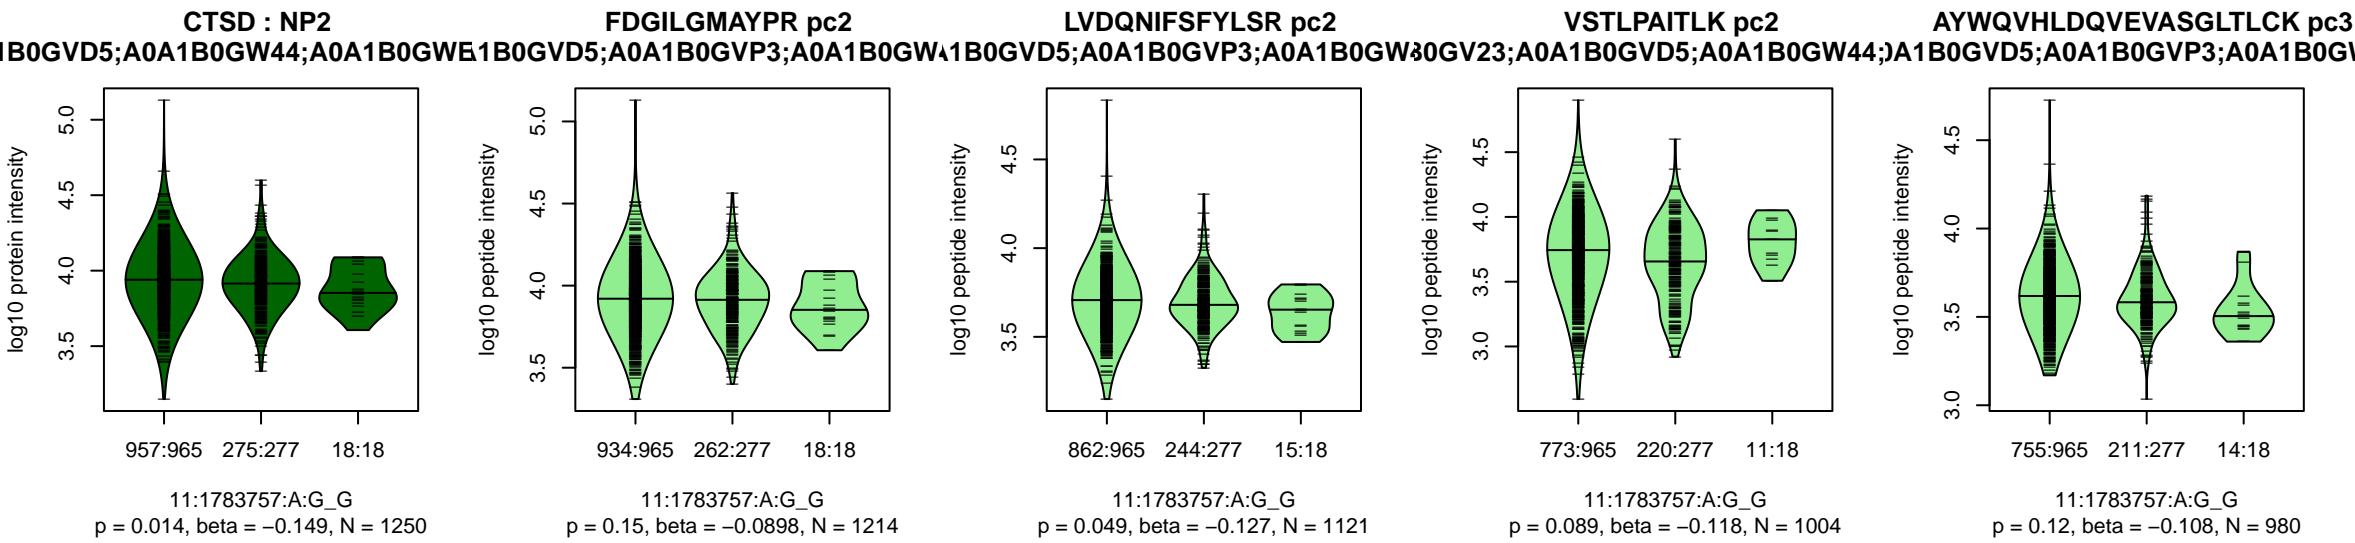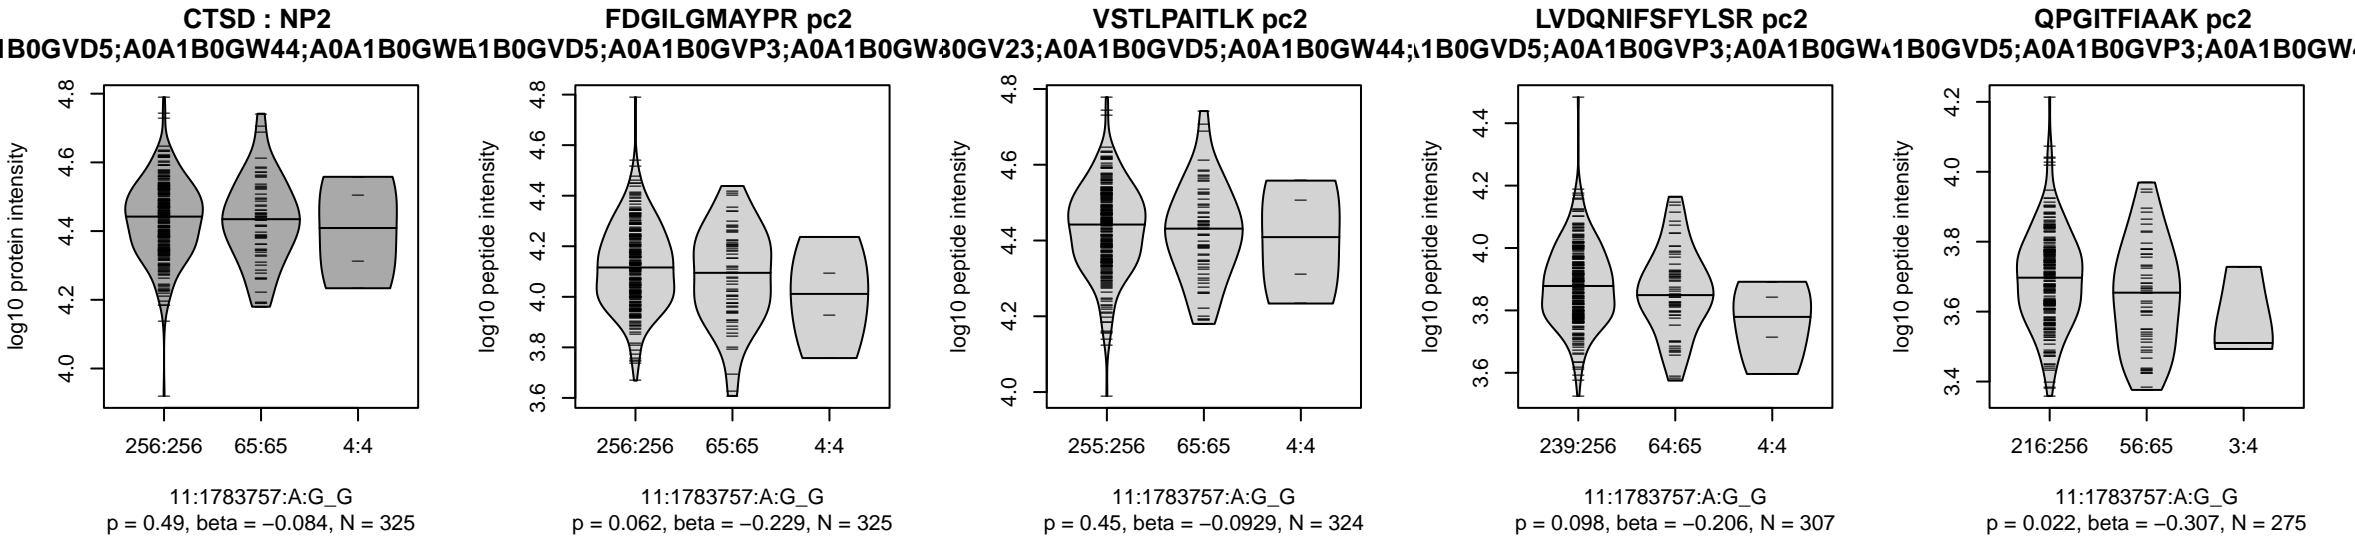

Assay Target: CTSD  
 Olink UniProt: P07339  
 UKB rsID: rs55861089  
 Proxy rsID: rs55861089  
 UKB SNP: 11:1783757:A:G  
 Proxy SNP: 11:1783757:A:G  
 UKB log10(p): 540.3  
 UKB BETA: -0.492  
 -----NA  
 1214:1121:1004:980:964:486:40

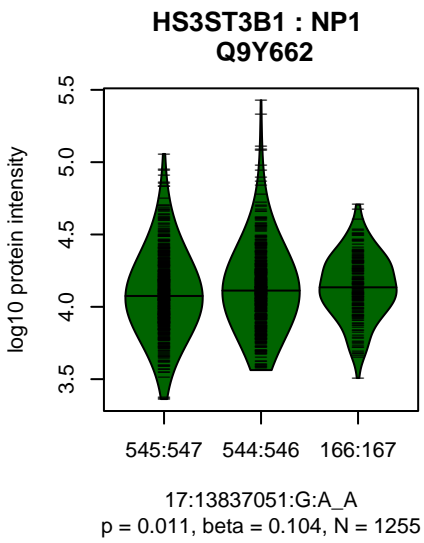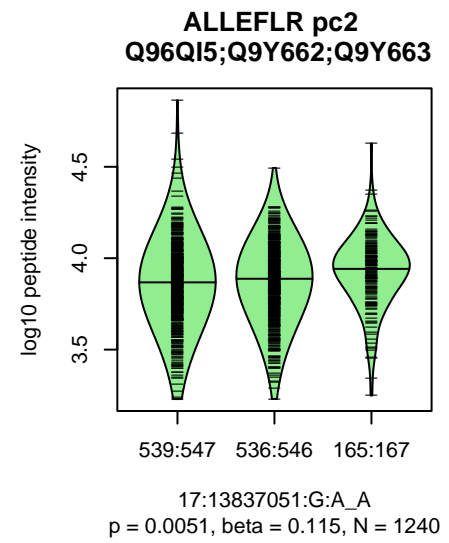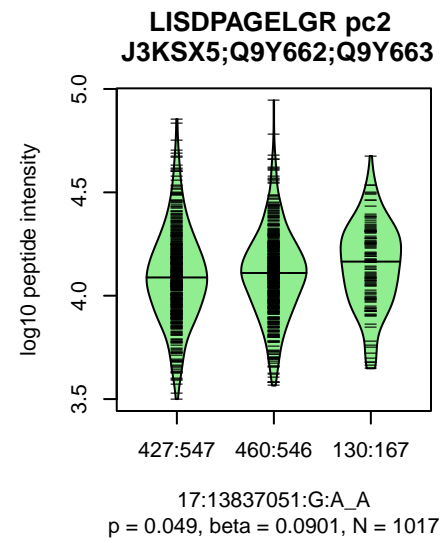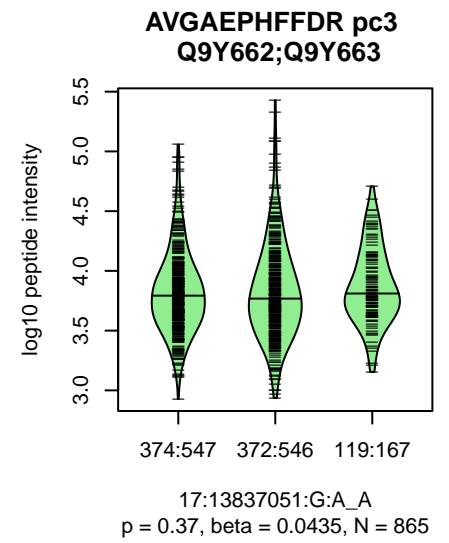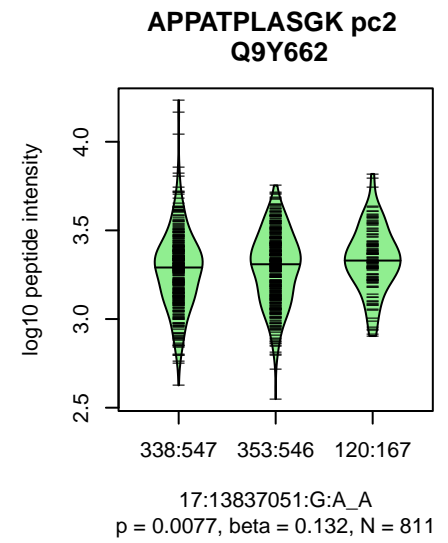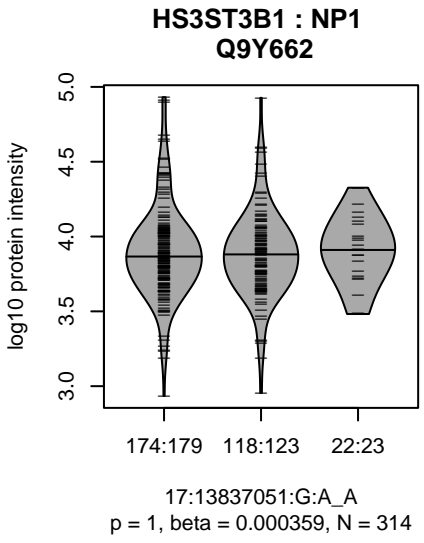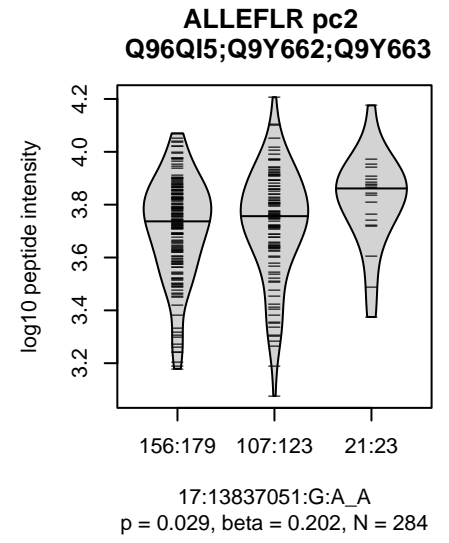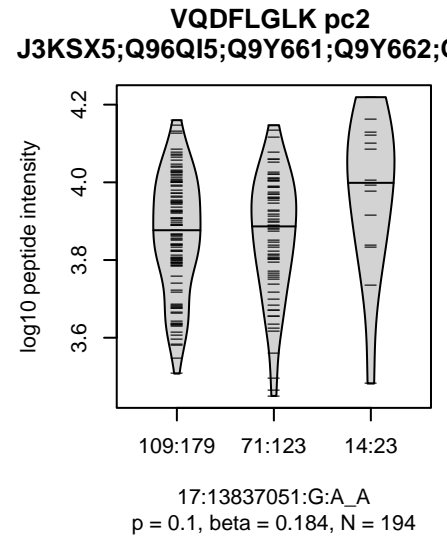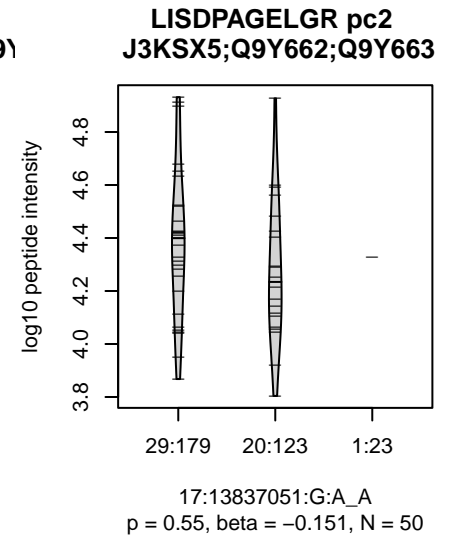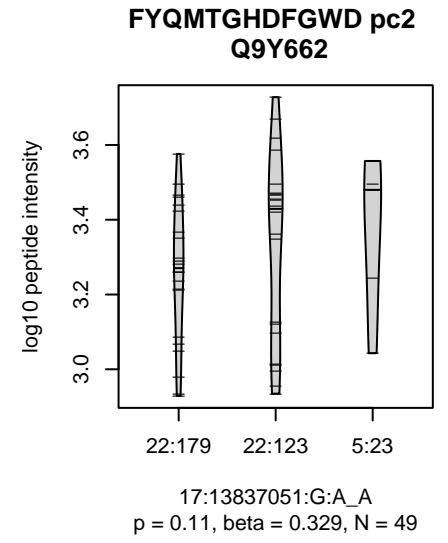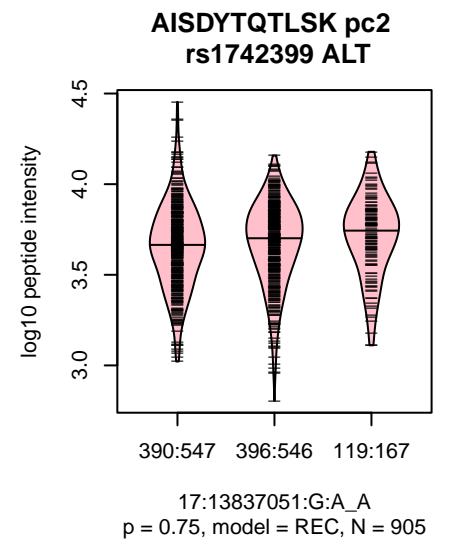

Assay Target: HS3ST3B1  
 Olink UniProt: Q9Y662  
 UKB rsID: rs17669311  
 Proxy rsID: rs17669311  
 UKB SNP: 17:13837051:G:A  
 Proxy SNP: 17:13837051:G:A  
 UKB log10(p): 538.7  
 UKB BETA: 0.32  
 \*---\*---\*---\*---\*---\*---\*---\*  
 1240:1017:865:811:784:760:598





**SHBG : NP2  
P04278**

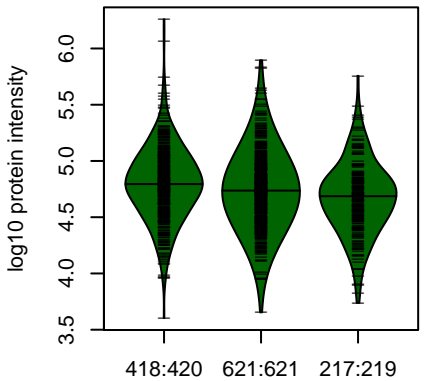

17:7537792:T:C\_T  
p = 1.7e-08, beta = -0.227, N = 1256

**VVLSQGSK pc2  
I3L145;I3L2X4;P04278;P04278-5\_L2F1;I3L2X4;I3L4B9;P04278;P04278-2\_J1;P04278;P04278-2;P04278-3;P042F1;I3L2X4;I3L4B9;P04278;P04278-2;**

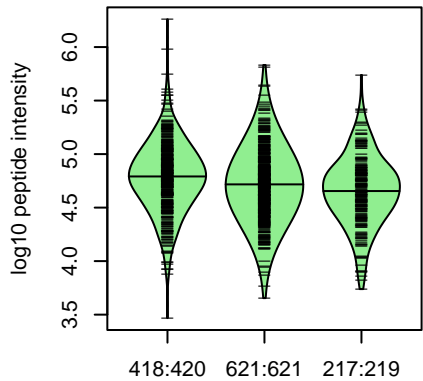

17:7537792:T:C\_T  
p = 1.4e-08, beta = -0.229, N = 1256

**QAEISASAPTSR pc2**

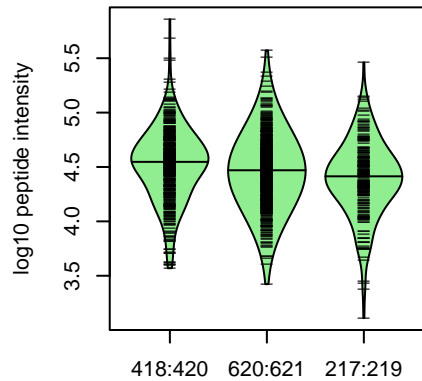

17:7537792:T:C\_T  
p = 5e-08, beta = -0.22, N = 1255

**QVSGPLTSK pc2**

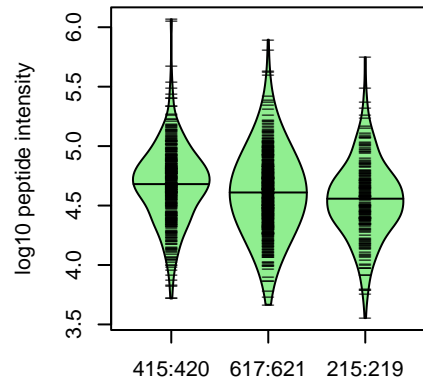

17:7537792:T:C\_T  
p = 5.8e-09, beta = -0.236, N = 1247

**DGRPEIQLHNNHWAQLTVGAGPR pc2**

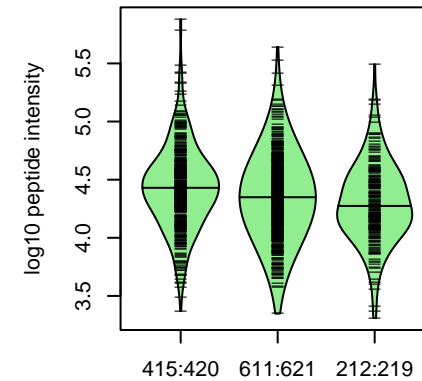

17:7537792:T:C\_T  
p = 1.4e-07, beta = -0.214, N = 1238

**SHBG : NP2  
P04278**

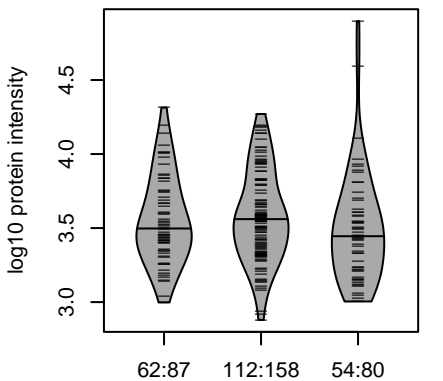

17:7537792:T:C\_T  
p = 0.33, beta = -0.0891, N = 228

**QAEISASAPTSR pc2**

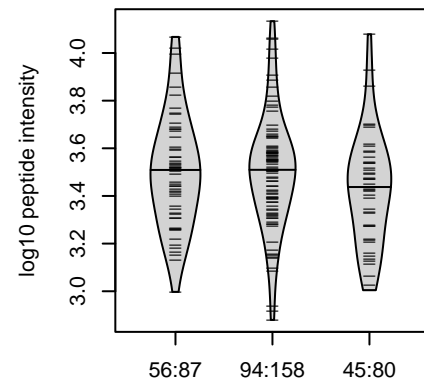

17:7537792:T:C\_T  
p = 0.22, beta = -0.121, N = 195

**DGRPEIQLHNNHWAQLTVGAGPR pc2**

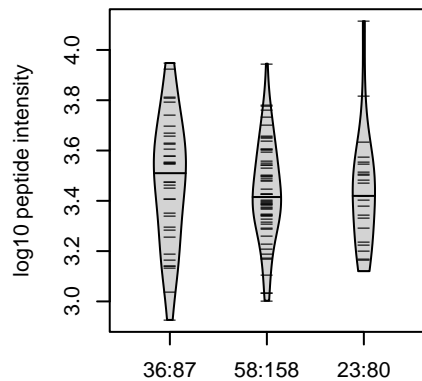

17:7537792:T:C\_T  
p = 0.33, beta = -0.126, N = 117

**VVLSQGSK pc2**

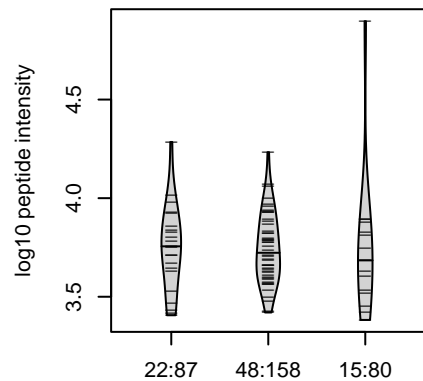

17:7537792:T:C\_T  
p = 0.94, beta = 0.0111, N = 85

**DDWFMLGLR pc2**

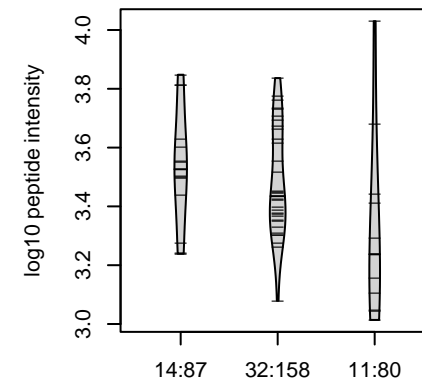

17:7537792:T:C\_T  
p = 0.011, beta = -0.478, N = 57

Assay Target: SHBG  
Olink UniProt: P04278  
UKB rsID: rs727428  
Proxy rsID: rs727428  
UKB SNP: 17:7537792:T:C  
Proxy SNP: 17:7537792:T:C  
UKB log10(p): 514.8  
UKB BETA: 0.272  
\*\*\*\*\*-\*-\*\*  
1256:1255:1247:1238:1238:123

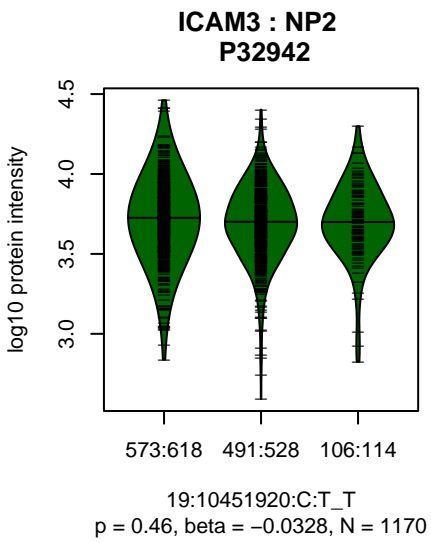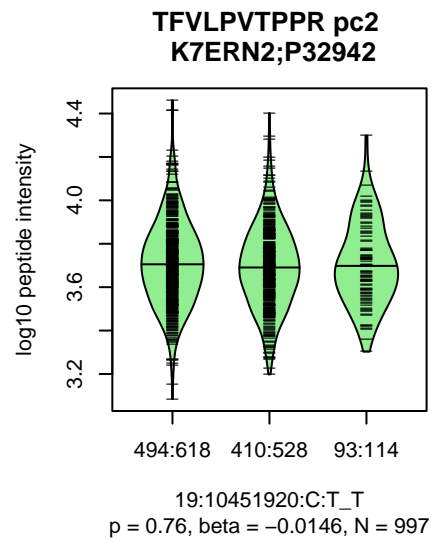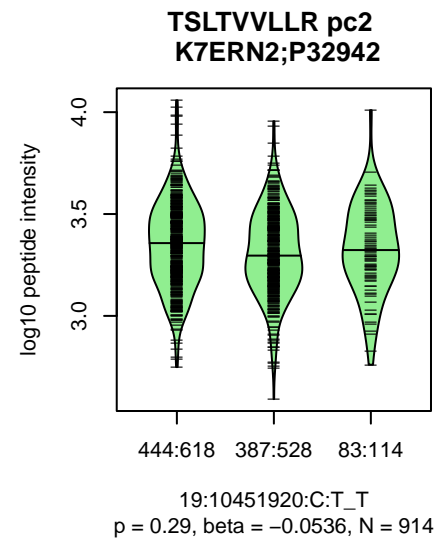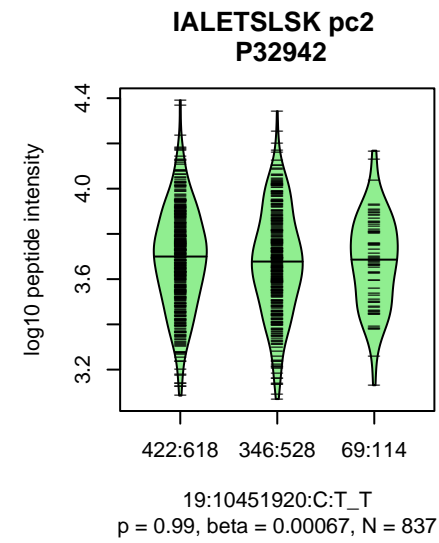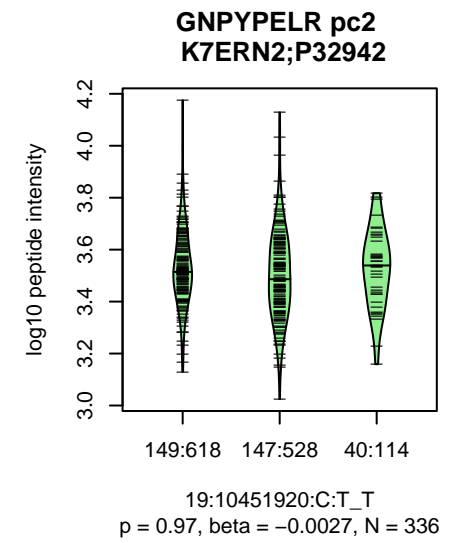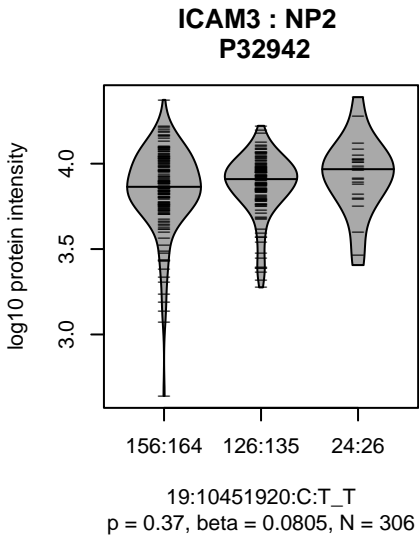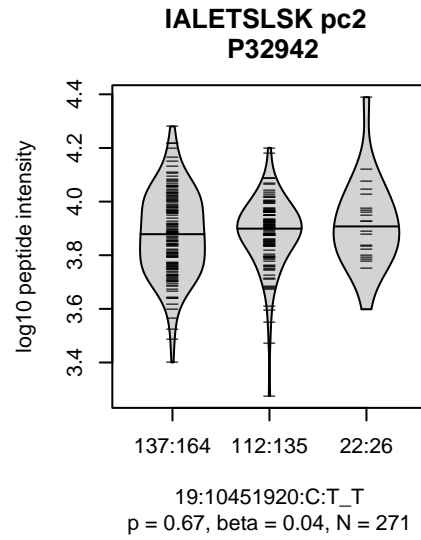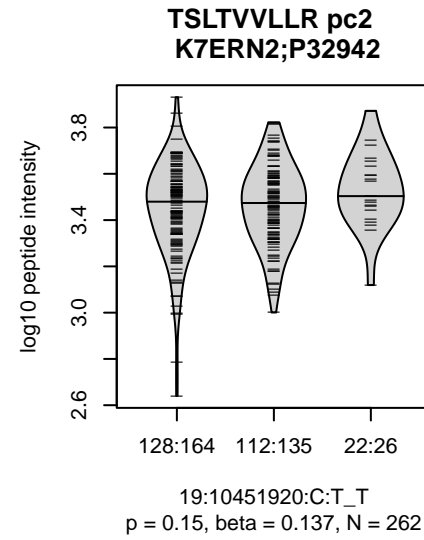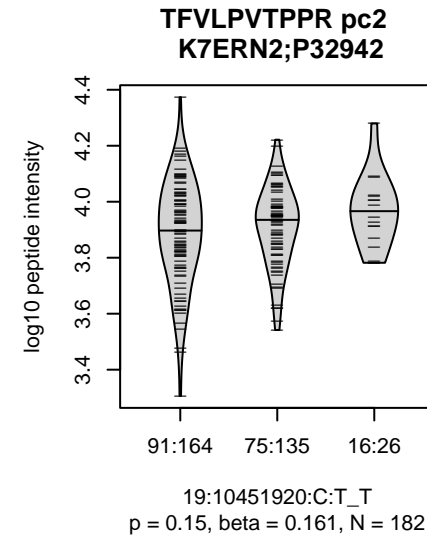

Assay Target: ICAM3  
 Olink UniProt: P32942  
 UKB rsID: rs61451658  
 Proxy rsID: rs61451658  
 UKB SNP: 19:10451920:C:T  
 Proxy SNP: 19:10451920:C:T  
 UKB log10(p): 510  
 UKB BETA: 0.309  
 - - - - -  
 997:914:837:336:144:141:71

**ANGPTL3 : NP4  
Q9Y5C1**

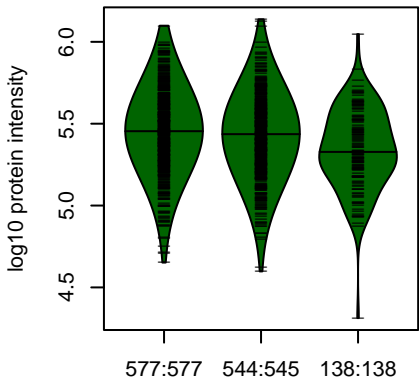

1:63040728:G:T\_T  
p = 1.8e-05, beta = -0.179, N = 1259

**DLLQTVEDQYK pc2  
Q9Y5C1**

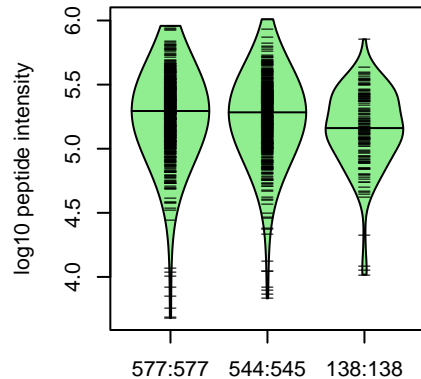

1:63040728:G:T\_T  
p = 0.00049, beta = -0.146, N = 1259

**MLIHPTDSESEFE pc2  
Q9Y5C1**

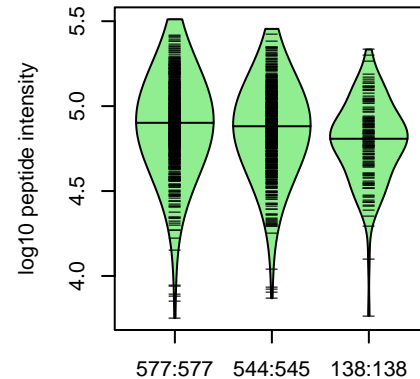

1:63040728:G:T\_T  
p = 1.8e-05, beta = -0.18, N = 1259

**GQINDIFQK pc2  
Q9Y5C1**

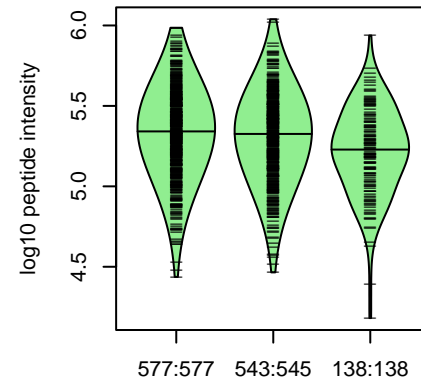

1:63040728:G:T\_T  
p = 8e-05, beta = -0.165, N = 1258

**ILANGLLQLGHGLK pc3  
Q9Y5C1**

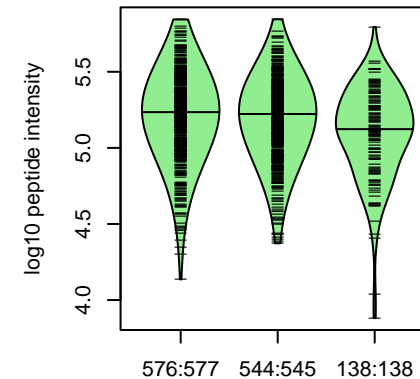

1:63040728:G:T\_T  
p = 0.00013, beta = -0.161, N = 1258

**ANGPTL3 : NP4  
Q9Y5C1**

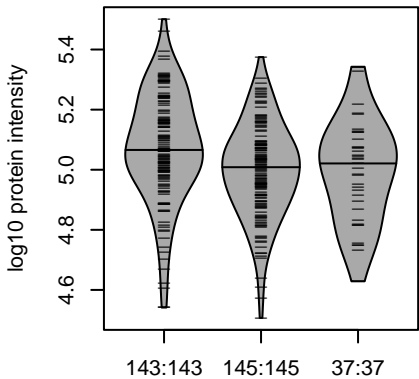

1:63040728:G:T\_T  
p = 0.0023, beta = -0.248, N = 325

**DLVFSTWDHK pc2  
Q9Y5C1**

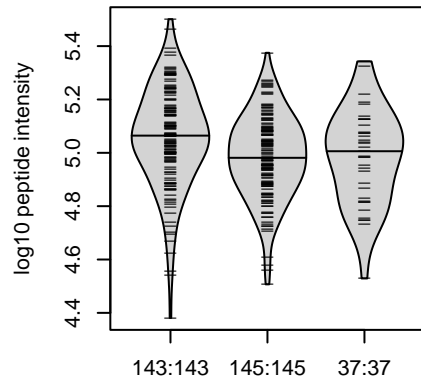

1:63040728:G:T\_T  
p = 0.0065, beta = -0.222, N = 325

**GQINDIFQK pc2  
Q9Y5C1**

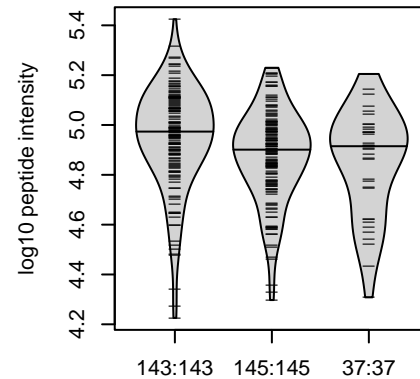

1:63040728:G:T\_T  
p = 0.0038, beta = -0.236, N = 325

**IELEDWK pc2  
Q9Y5C1**

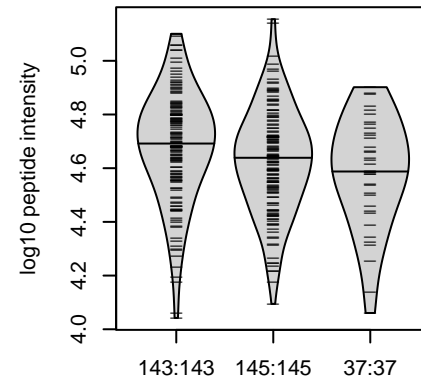

1:63040728:G:T\_T  
p = 0.035, beta = -0.172, N = 325

**MLIHPTDSESEFE pc2  
Q9Y5C1**

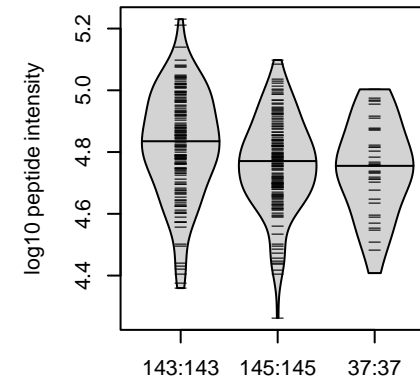

1:63040728:G:T\_T  
p = 0.0031, beta = -0.241, N = 325

Assay Target: ANGPTL3  
Olink UniProt: Q9Y5C1  
UKB rsID: rs775677524  
Proxy rsID: rs12038768  
UKB SNP: 1:63070537:AGTTAA  
Proxy SNP: 1:63040728:G:T  
UKB log10(p): 500.3  
UKB BETA: -0.282  
\*\*\*\*\*\_\*\*\*\*\*  
1259:1259:1258:1258:1257:125





**FCER2 : NP2  
P06734**

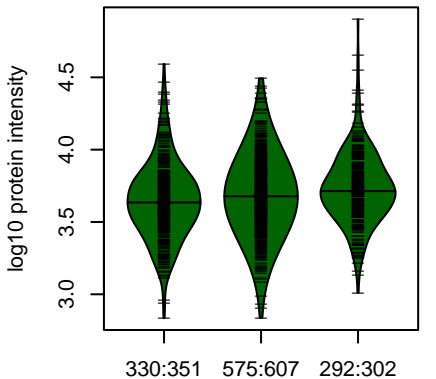

19:7759569:T:C\_T  
 $p = 2.4e-05$ ,  $\beta = 0.168$ ,  $N = 1197$

**SQGEDCVMMR pc2  
K3W4U1;P06734**

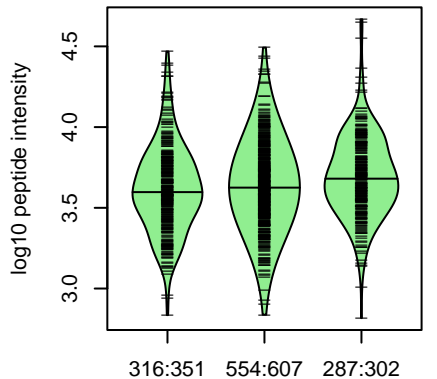

19:7759569:T:C\_T  
 $p = 0.00021$ ,  $\beta = 0.15$ ,  $N = 1157$

**LGAWVCDR pc2  
K3W4U1;P06734**

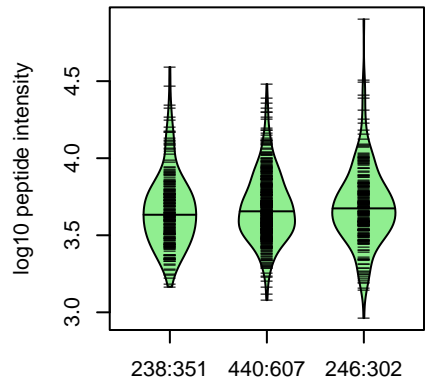

19:7759569:T:C\_T  
 $p = 0.14$ ,  $\beta = 0.0668$ ,  $N = 924$

**SQSTQISQELEELRAEQQR pc3  
K3W4U1;P06734**

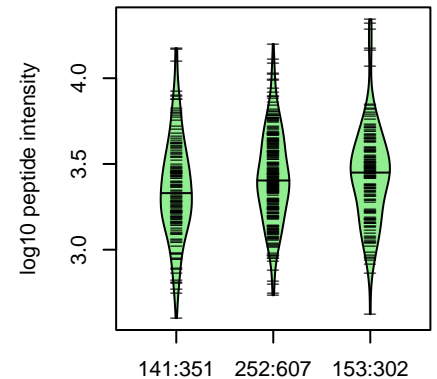

19:7759569:T:C\_T  
 $p = 0.016$ ,  $\beta = 0.139$ ,  $N = 546$

**HASHTGSWIGLR pc3  
K3W4U1;P06734**

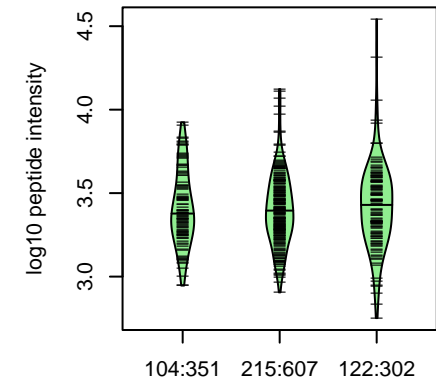

19:7759569:T:C\_T  
 $p = 0.94$ ,  $\beta = 0.00477$ ,  $N = 441$

**FCER2 : NP2  
P06734**

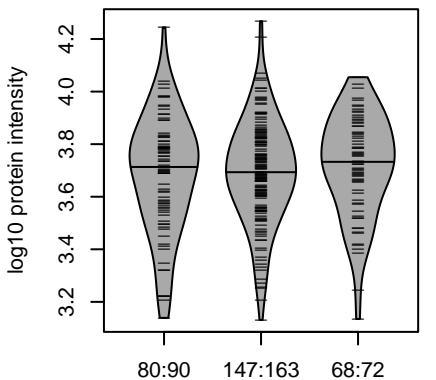

19:7759569:T:C\_T  
 $p = 0.16$ ,  $\beta = 0.115$ ,  $N = 295$

**LGAWVCDR pc2  
K3W4U1;P06734**

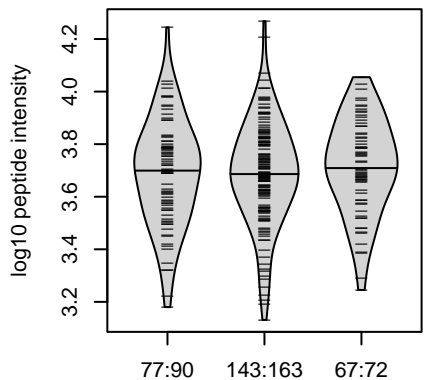

19:7759569:T:C\_T  
 $p = 0.22$ ,  $\beta = 0.101$ ,  $N = 287$

**SQGEDCVMMR pc2  
K3W4U1;P06734**

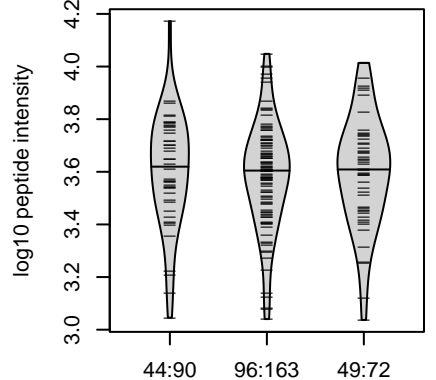

19:7759569:T:C\_T  
 $p = 0.8$ ,  $\beta = 0.0261$ ,  $N = 189$

**SQSTQISQELEELRAEQQR pc3  
K3W4U1;P06734**

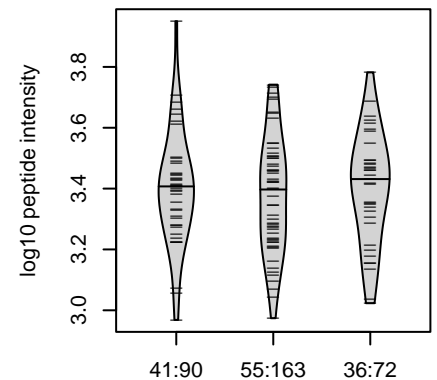

19:7759569:T:C\_T  
 $p = 0.8$ ,  $\beta = 0.0278$ ,  $N = 132$

Assay Target: FCER2  
 Olink UniProt: P06734  
 UKB rsID: rs11260012  
 Proxy rsID: rs11260012  
 UKB SNP: 19:7759569:T:C  
 Proxy SNP: 19:7759569:T:C  
 UKB log10(p): 497.2  
 UKB BETA: -0.289  
 \*:-:-:-:-  
 1157:924:546:441:205

**GALNT2 : NP4**  
**Q10471**

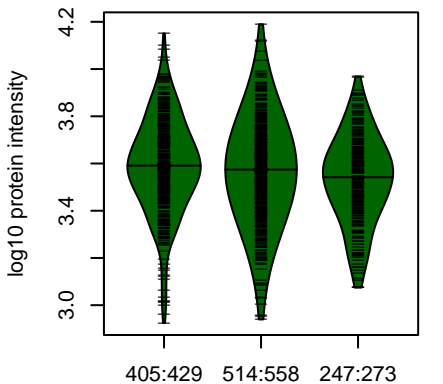

1:230295691:G:A\_G  
p = 0.00094, beta = -0.131, N = 1166

**NVPYGNIQSR pc2**  
**Q10471**

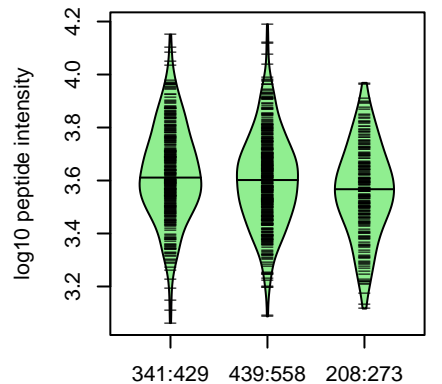

1:230295691:G:A\_G  
p = 0.00038, beta = -0.153, N = 988

**GGFDWNLVFK pc2**  
**Q10471**

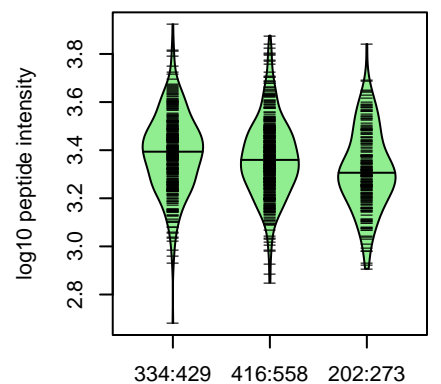

1:230295691:G:A\_G  
p = 1.1e-05, beta = -0.191, N = 952

**TPMIAGGLFVMDK pc2**  
**Q10471**

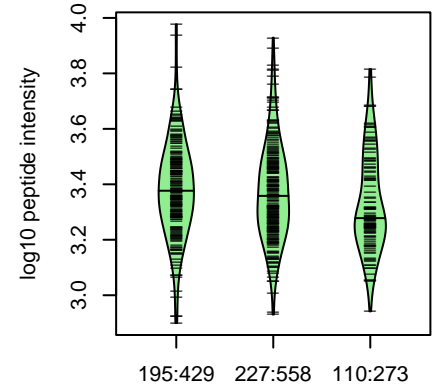

1:230295691:G:A\_G  
p = 0.056, beta = -0.111, N = 532

**QGNPVAPIK pc2**  
**Q10471**

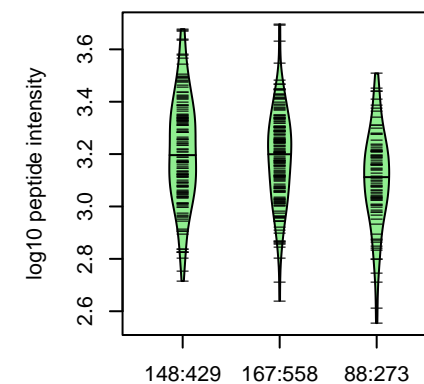

1:230295691:G:A\_G  
p = 0.0026, beta = -0.197, N = 403

**GALNT2 : NP4**  
**Q10471**

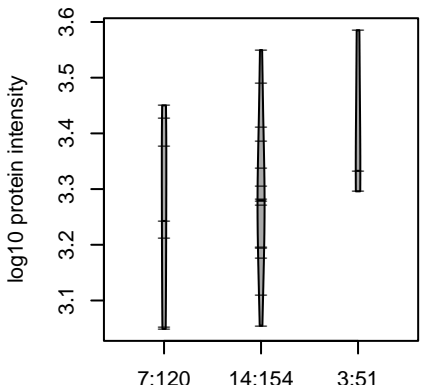

1:230295691:G:A\_A  
p = 0.88, beta = 0.0455, N = 24

**GGFDWNLVFK pc2**  
**Q10471**

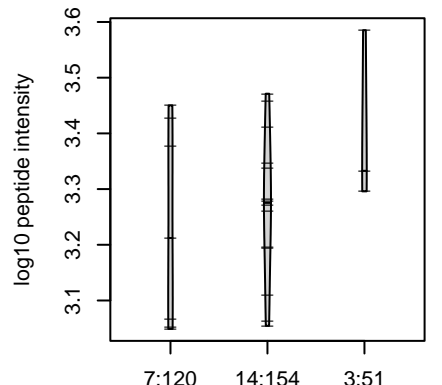

1:230295691:G:A\_A  
p = 0.97, beta = 0.0129, N = 24

Assay Target: GALNT2  
Olink UniProt: Q10471  
UKB rsID: rs4846914  
Proxy rsID: rs4846914  
UKB SNP: 1:230295691:G:A  
Proxy SNP: 1:230295691:G:A  
UKB log10(p): 490  
UKB BETA: 0.287  
\*:\*:-\*:-\*:-:NA  
988:952:532:403:337:85:27:14

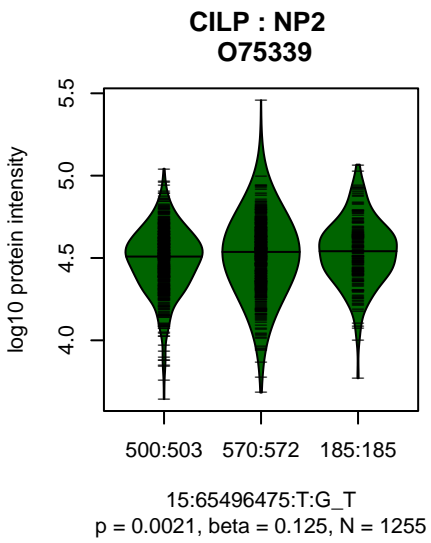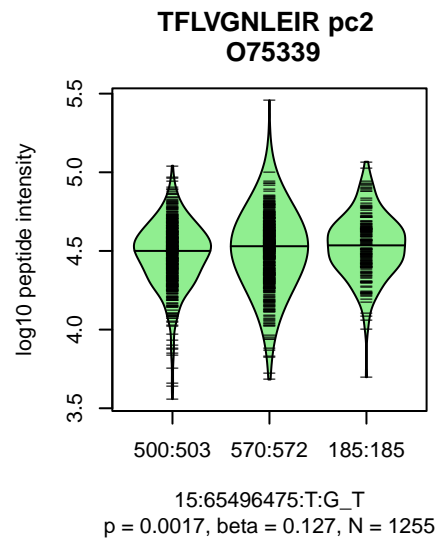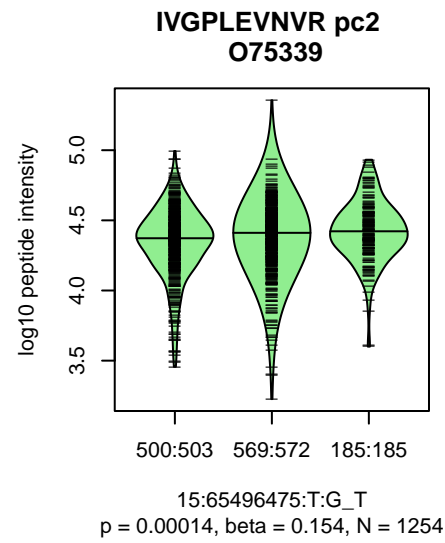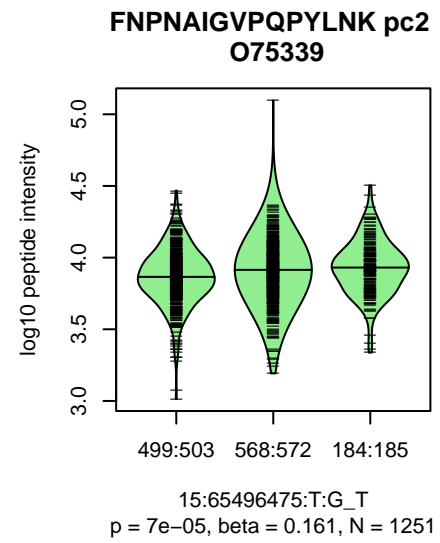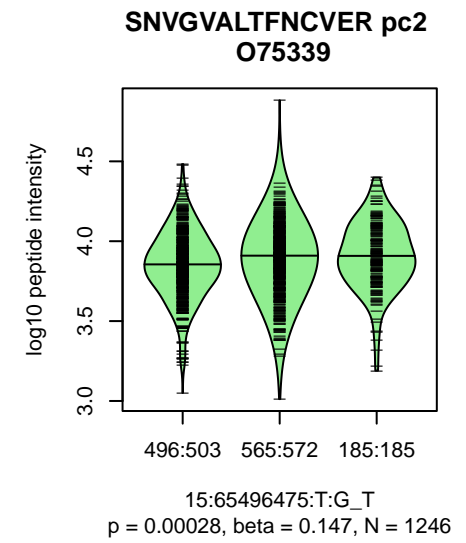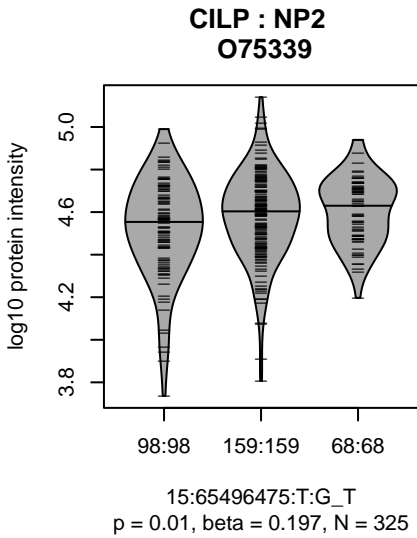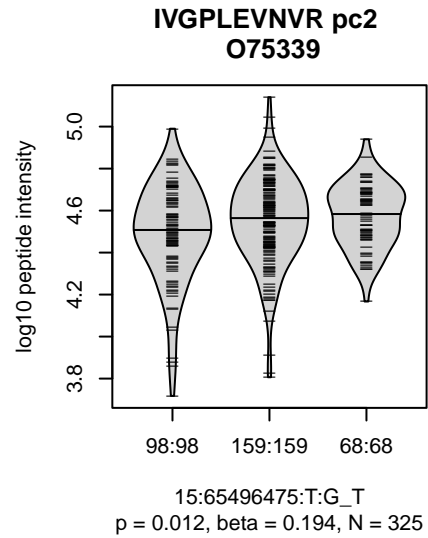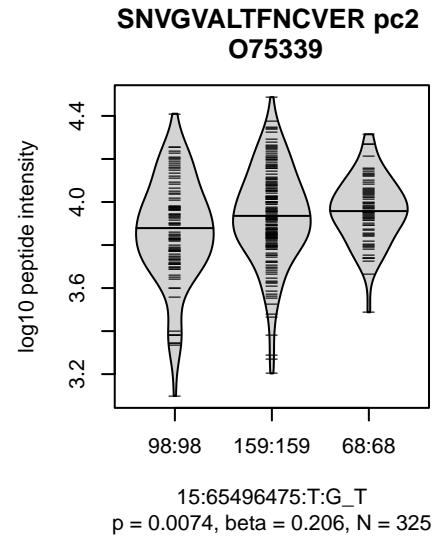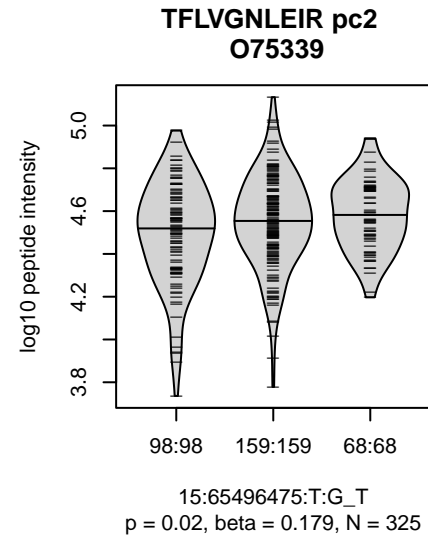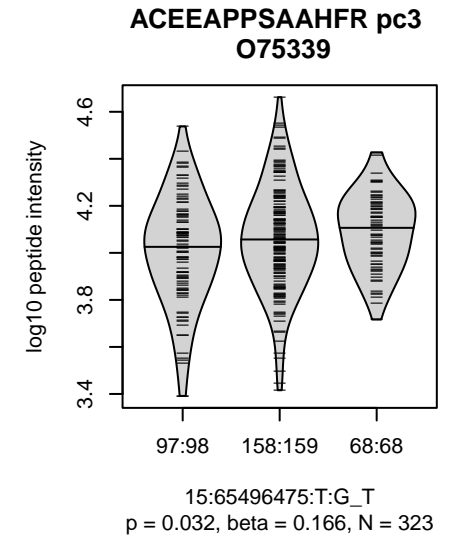

Assay Target: CILP  
 Olink UniProt: O75339  
 UKB rsID: rs2585035  
 Proxy rsID: rs2585035  
 UKB SNP: 15:65496475:T:G  
 Proxy SNP: 15:65496475:T:G  
 UKB log10(p): 484.6  
 UKB BETA: -0.288  
 \*\*\*\*-\*-\*\*  
 1255:1254:1251:1246:1239:123



**GFRA2 : NP3  
O00451**

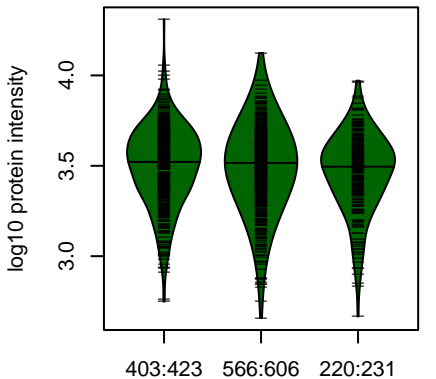

8:21474088:G:A\_G  
p = 0.057, beta = -0.0776, N = 1189

**LASIFSGTGADPVVSAK pc2  
O00451;O00451-3**

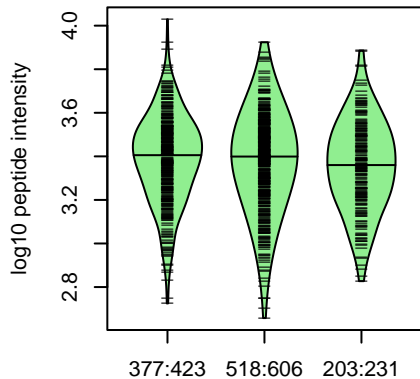

8:21474088:G:A\_G  
p = 0.15, beta = -0.0613, N = 1098

**QTILPSCSYEDK pc2  
O00451;O00451-2;O00451-3**

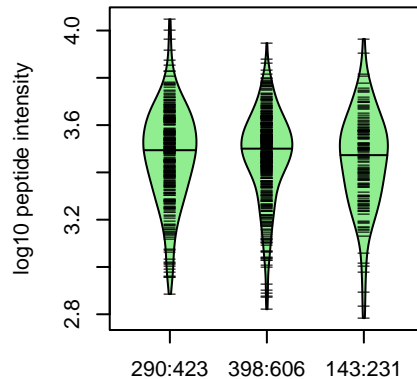

8:21474088:G:A\_G  
p = 0.31, beta = -0.0497, N = 831

**DFTENPLR pc2  
O00451;O00451-2;O00451-3**

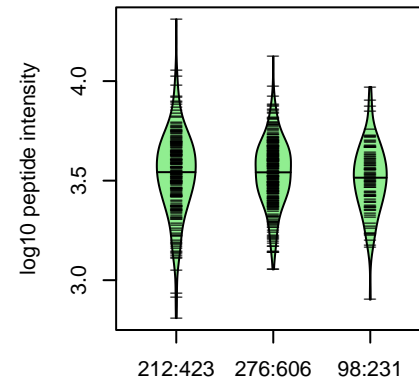

8:21474088:G:A\_G  
p = 0.36, beta = -0.053, N = 586

**ACNLNDNCK pc2  
O00451;O00451-2;O00451-3**

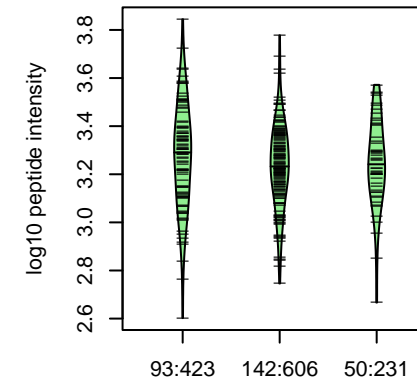

8:21474088:G:A\_G  
p = 0.16, beta = -0.118, N = 285

**GFRA2 : NP3  
O00451**

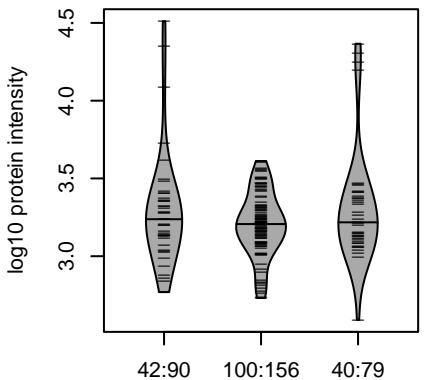

8:21474088:G:A\_G  
p = 0.71, beta = 0.041, N = 182

**LASIFSGTGADPVVSAK pc2  
O00451;O00451-3**

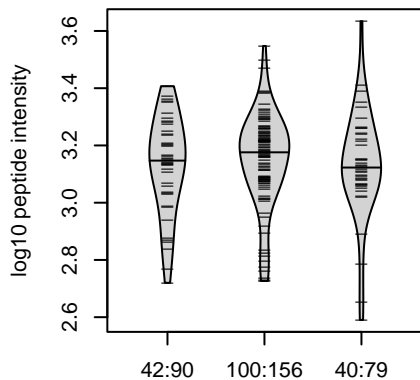

8:21474088:G:A\_G  
p = 0.83, beta = -0.023, N = 182

Assay Target: GFRA2  
Olink UniProt: O00451  
UKB rsID: rs1480999  
Proxy rsID: rs1480999  
UKB SNP: 8:21474088:G:A  
Proxy SNP: 8:21474088:G:A  
UKB log10(p): 474.1  
UKB BETA: 0.294  
-----  
1098:831:586:285:211:169:139

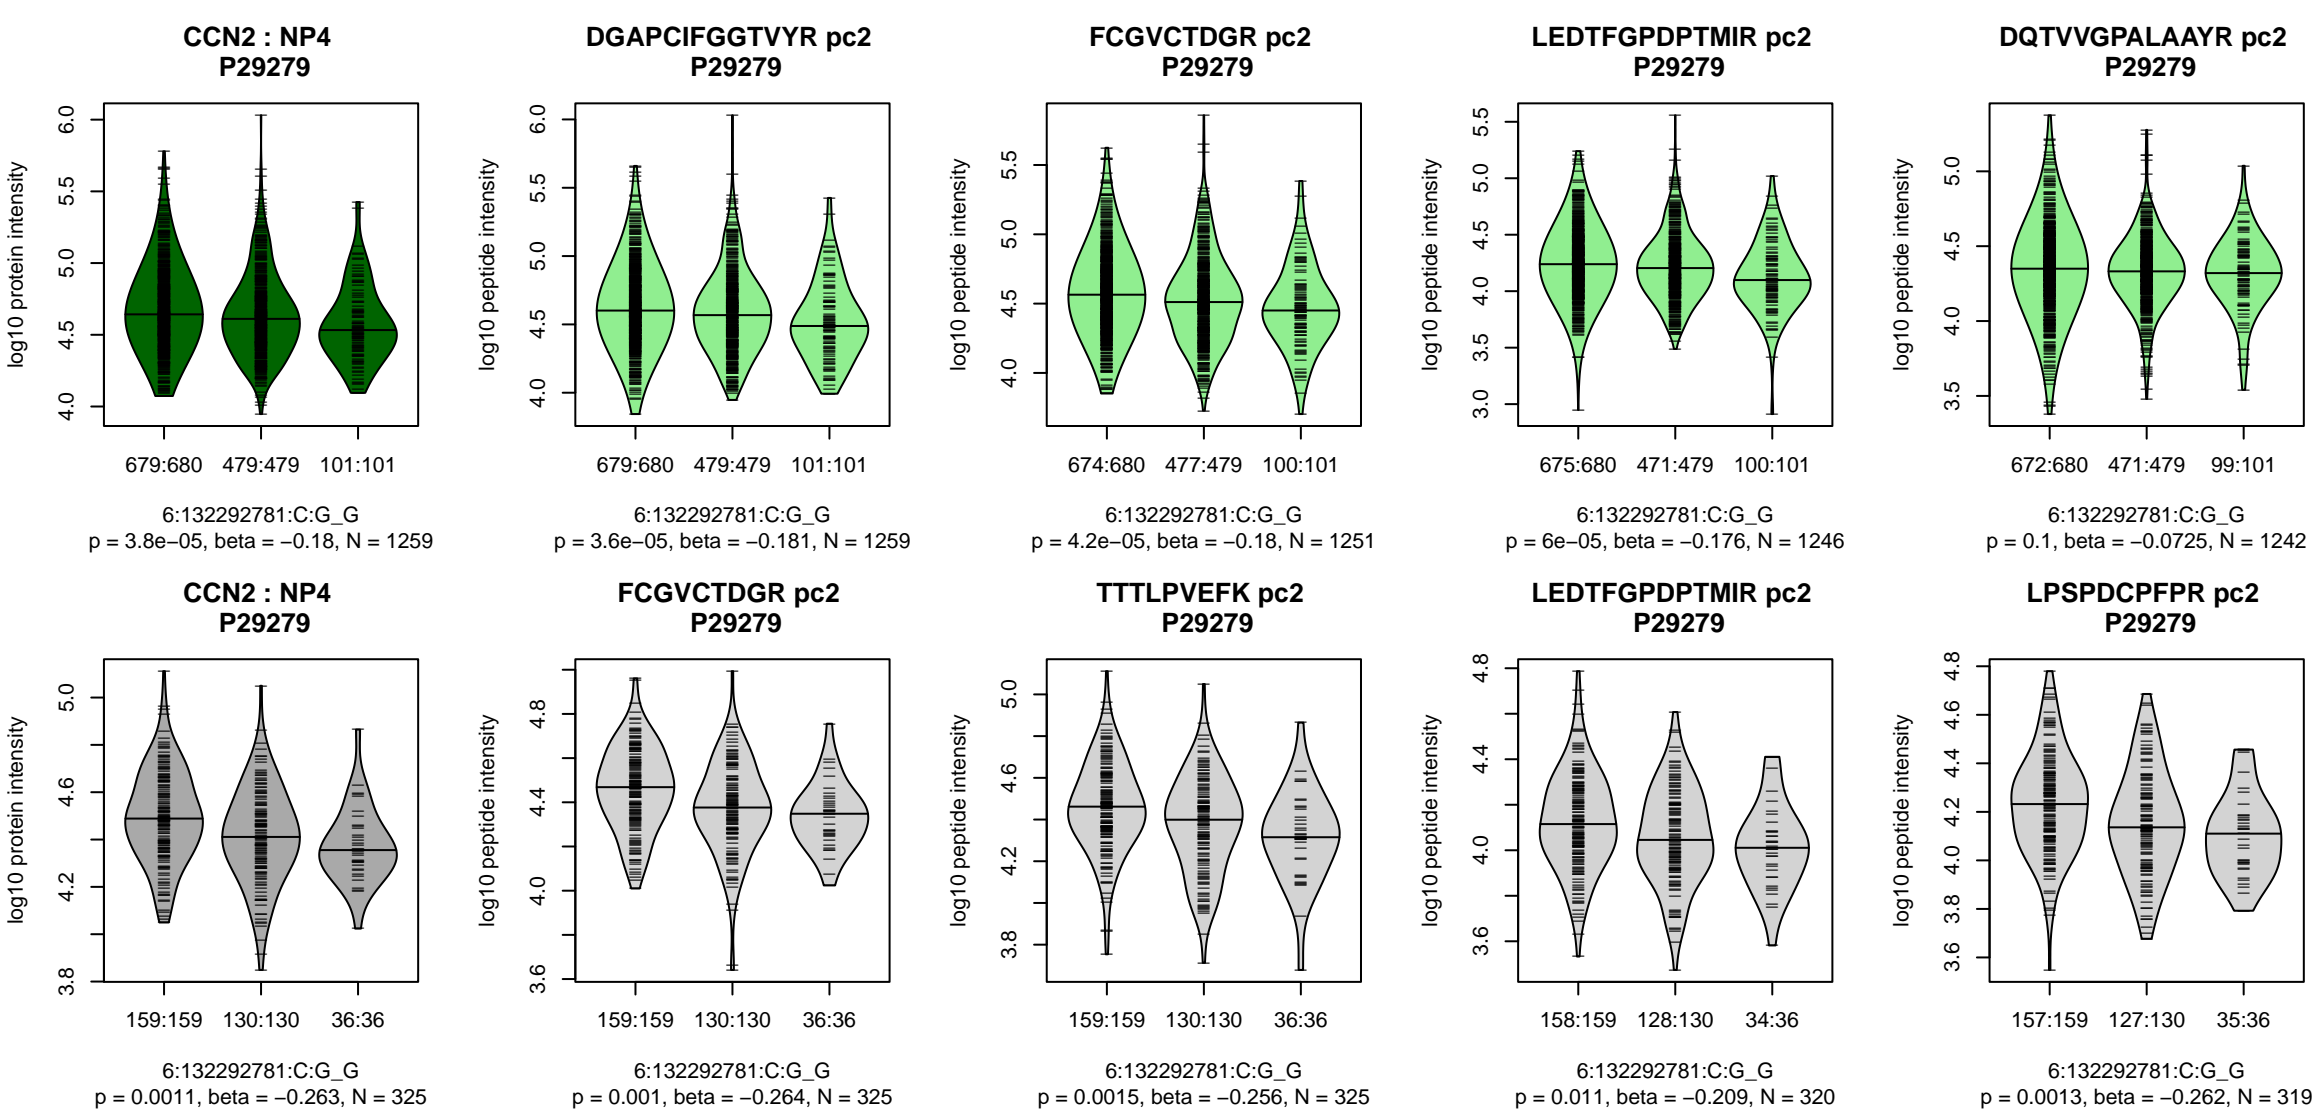

Assay Target: CCN2  
 Olink UniProt: P29279  
 UKB rsID: rs7767139  
 Proxy rsID: rs7767139  
 UKB SNP: 6:132292781:C:G  
 Proxy SNP: 6:132292781:C:G  
 UKB log<sub>10</sub>(p): 471.2  
 UKB BETA: -0.343  
 .....  
 1259:1251:1246:1242:1242:121

**SMOC1 : NP4**  
**Q9H4F8;Q9H4F8-2**

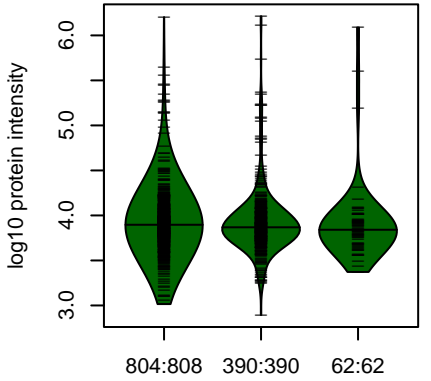

14:70354858:A:C\_A  
 $p = 0.033$ ,  $\beta = -0.102$ ,  $N = 1256$

**YVMPSCESDAR pc2**  
**Q9H4F8-2;Q9H4F8**

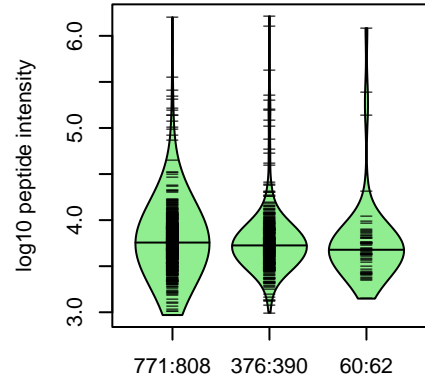

14:70354858:A:C\_A  
 $p = 0.026$ ,  $\beta = -0.109$ ,  $N = 1207$

**QSALEEAQQNPR pc2**  
**Q9H4F8-2;Q9H4F8**

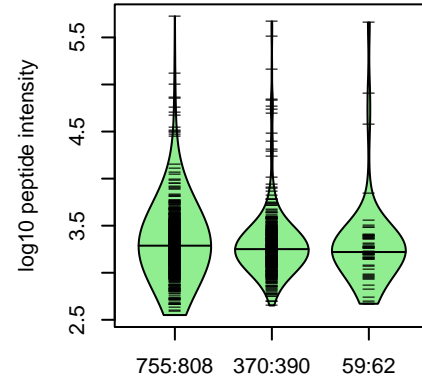

14:70354858:A:C\_A  
 $p = 0.039$ ,  $\beta = -0.102$ ,  $N = 1184$

**EGVIPECAPGGLYK pc2**  
**Q9H4F8-2;Q9H4F8**

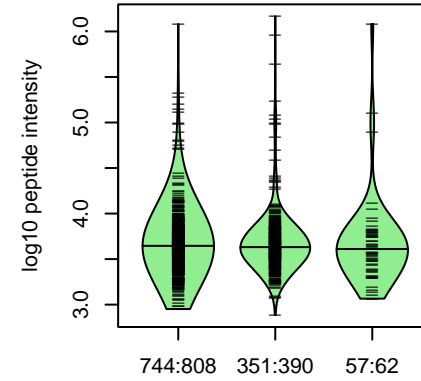

14:70354858:A:C\_A  
 $p = 0.28$ ,  $\beta = -0.0546$ ,  $N = 1152$

**SYESMCEYQR pc2**  
**Q9H4F8-2;Q9H4F8**

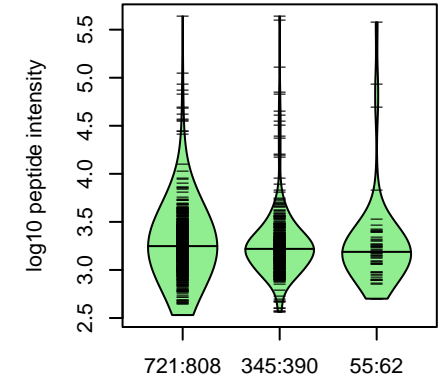

14:70354858:A:C\_A  
 $p = 0.027$ ,  $\beta = -0.113$ ,  $N = 1121$

**SMOC1 : NP4**  
**Q9H4F8;Q9H4F8-2**

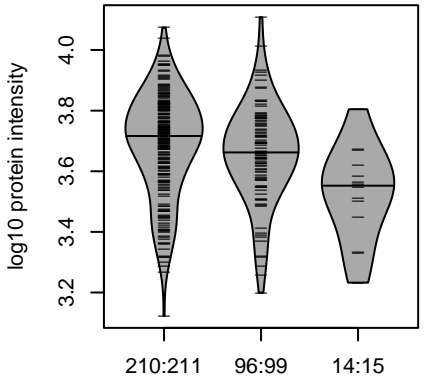

14:70354858:A:C\_A  
 $p = 0.00037$ ,  $\beta = -0.342$ ,  $N = 320$

**QSALEEAQQNPR pc2**  
**Q9H4F8-2;Q9H4F8**

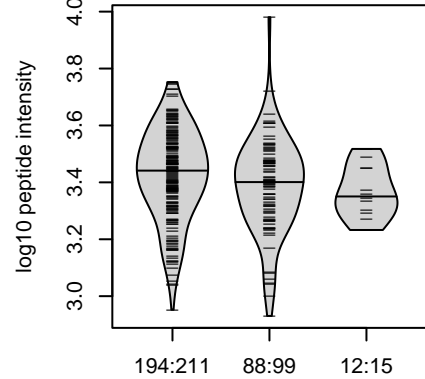

14:70354858:A:C\_A  
 $p = 0.0024$ ,  $\beta = -0.307$ ,  $N = 294$

**SYESMCEYQR pc2**  
**Q9H4F8-2;Q9H4F8**

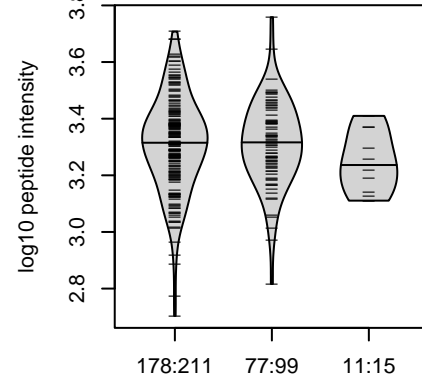

14:70354858:A:C\_A  
 $p = 0.21$ ,  $\beta = -0.135$ ,  $N = 266$

**YVMPSCESDAR pc2**  
**Q9H4F8-2;Q9H4F8**

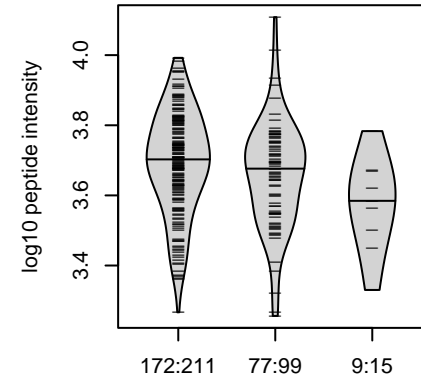

14:70354858:A:C\_A  
 $p = 0.0034$ ,  $\beta = -0.325$ ,  $N = 258$

**TTEADDPFK pc2**  
**Q9H4F8-2;Q9H4F8**

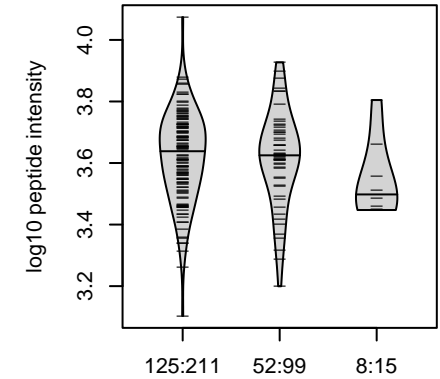

14:70354858:A:C\_A  
 $p = 0.22$ ,  $\beta = -0.156$ ,  $N = 185$

Assay Target: SMOC1  
Olink UniProt: Q9H4F8  
UKB rsID: rs1958078  
Proxy rsID: rs1958078  
UKB SNP: 14:70354858:A:C  
Proxy SNP: 14:70354858:A:C  
UKB log10(p): 455.1  
UKB BETA: 0.358  
-----  
1207:1184:1152:1121:1047:104





**PI3 : NP3  
P19957**

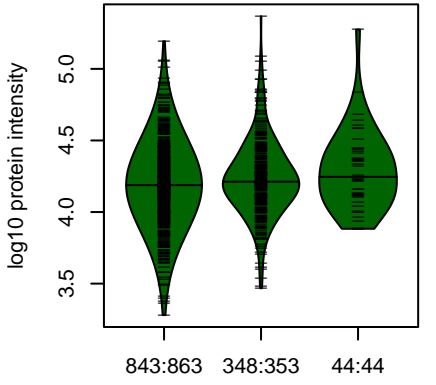

20:43788804:C:T\_T  
p = 6.7e-05, beta = 0.206, N = 1235

**PGSCPIILIR pc2  
P19957**

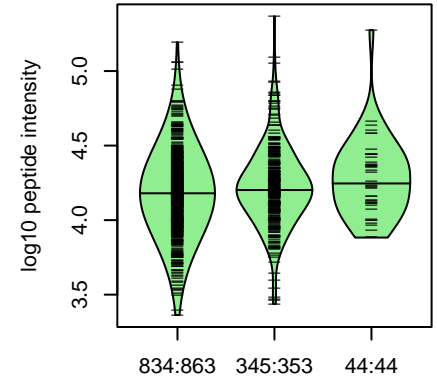

20:43788804:C:T\_T  
p = 0.00016, beta = 0.196, N = 1223

**CAMLNPPNR pc2  
P19957**

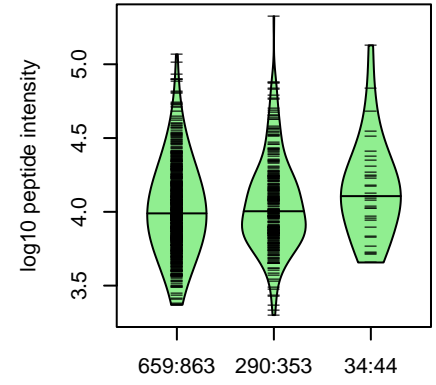

20:43788804:C:T\_T  
p = 0.0035, beta = 0.169, N = 983

**VPFNGQDPVK pc2  
P19957**

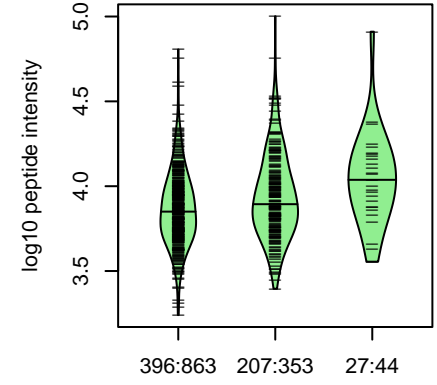

20:43788804:C:T\_T  
p = 1.3e-07, beta = 0.36, N = 630

**DTDCPGIK pc2  
P19957**

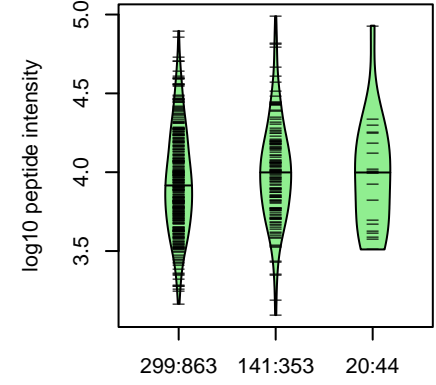

20:43788804:C:T\_T  
p = 0.063, beta = 0.15, N = 460

**PI3 : NP3  
P19957**

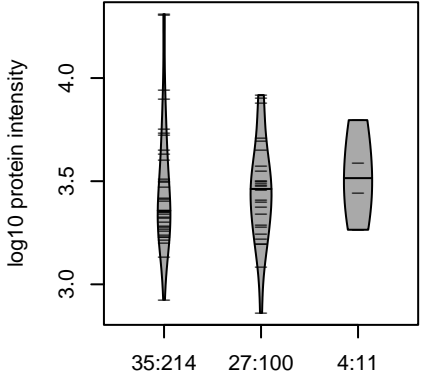

20:43788804:C:T\_T  
p = 0.95, beta = -0.0111, N = 66

**PGSCPIILIR pc2  
P19957**

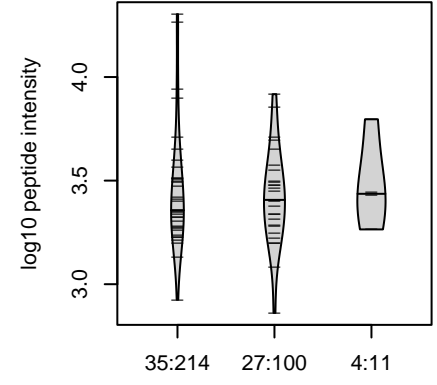

20:43788804:C:T\_T  
p = 0.72, beta = -0.0706, N = 66

Assay Target: PI3  
Olink UniProt: P19957  
UKB rsID: rs35770435  
Proxy rsID: rs35770435  
UKB SNP: 20:43788804:C:T  
Proxy SNP: 20:43788804:C:T  
UKB log10(p): 450.3  
UKB BETA: 0.345  
\*.\*.\*.-.-  
1223:983:630:460:31



**CST3 : NP4**  
**P01034**

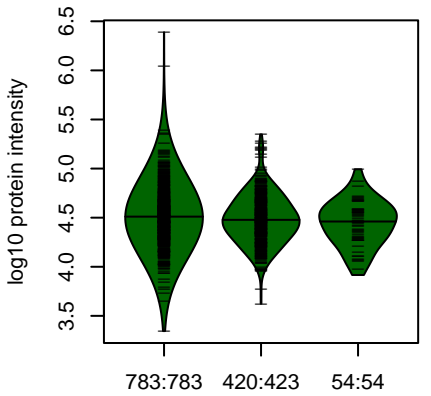

20:23612737:C:T\_C  
p = 0.011, beta = -0.124, N = 1257

**LVGGPMDASVEEEGVRR pc3**  
**P01034**

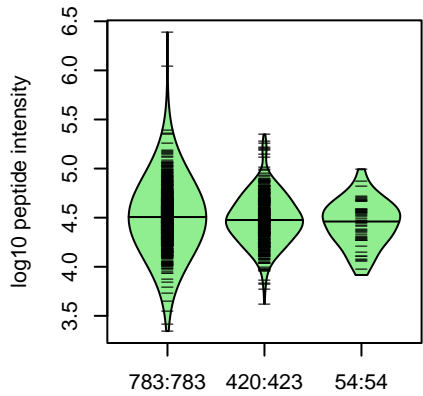

20:23612737:C:T\_C  
p = 0.01, beta = -0.125, N = 1257

**ASNDMYHSR pc2**  
**P01034**

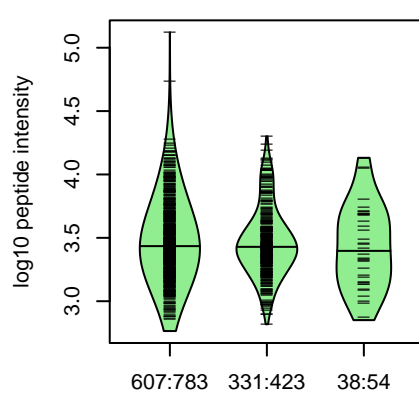

20:23612737:C:T\_C  
p = 0.39, beta = -0.0483, N = 976

**ALDFAVGEYNK pc2**  
**P01034**

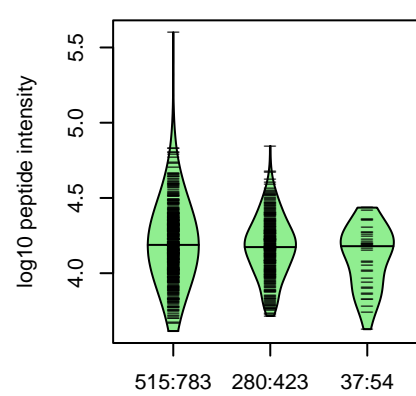

20:23612737:C:T\_C  
p = 0.028, beta = -0.131, N = 832

**LVGGPMDASVEEEGVRR pc2**  
**P01034**

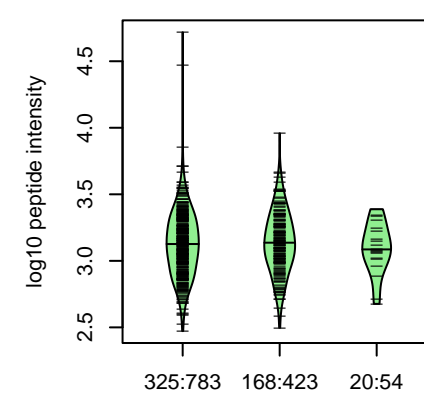

20:23612737:C:T\_C  
p = 0.98, beta = -0.00157, N = 513

**CST3 : NP4**  
**P01034**

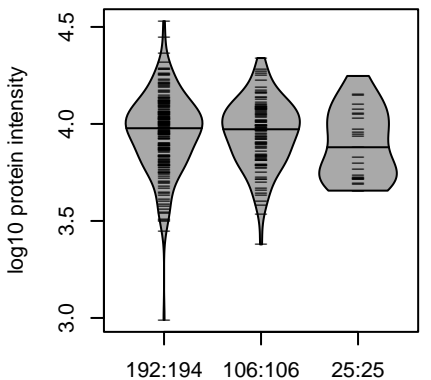

20:23612737:C:T\_C  
p = 0.26, beta = -0.0966, N = 323

**LVGGPMDASVEEEGVRR pc3**  
**P01034**

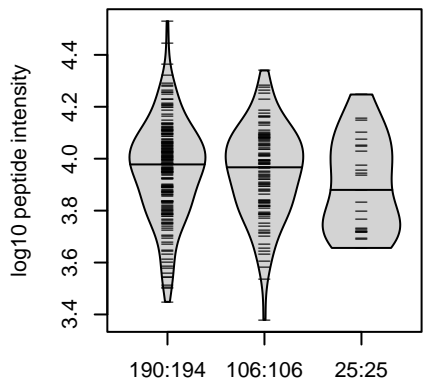

20:23612737:C:T\_C  
p = 0.21, beta = -0.109, N = 321

**ASNDMYHSR pc2**  
**P01034**

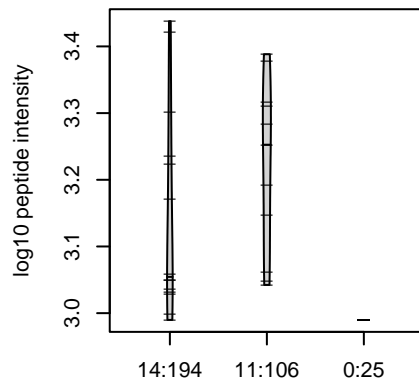

20:23612737:C:T\_C  
p = 0.47, beta = 0.273, N = 25

Assay Target: CST3  
Olink UniProt: P01034  
UKB rsID: rs911119  
Proxy rsID: rs911119  
UKB SNP: 20:23612737:C:T  
Proxy SNP: 20:23612737:C:T  
UKB log10(p): 447.4  
UKB BETA: 0.307  
- - - - - : NA:NA:NA  
1257:976:832:513:510:184:160:





**FBN2 : NP5  
P35556**

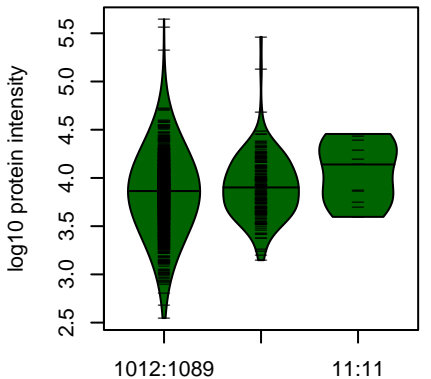

5:127874149:G:C\_C  
p = 0.0037, beta = 0.219, N = 1179

**TLPGGNQCIVPICR pc2  
E9PHW4;F6U495;P35555;P35556**

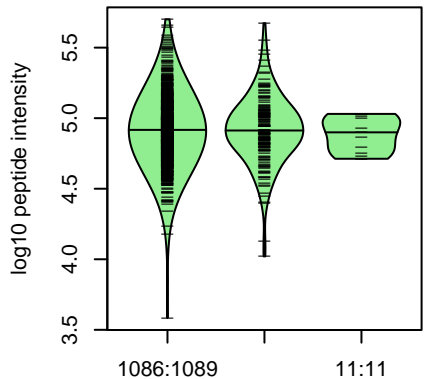

5:127874149:G:C\_C  
p = 0.92, beta = 0.00745, N = 1257

**VCVDTHMR pc2  
D6RJI3;P35555;P35556**

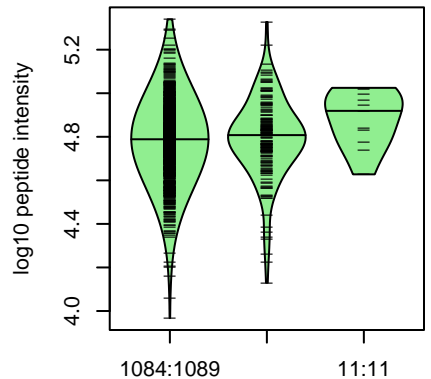

5:127874149:G:C\_C  
p = 0.18, beta = 0.101, N = 1255

**PGICENGR pc2  
P35555;P35556**

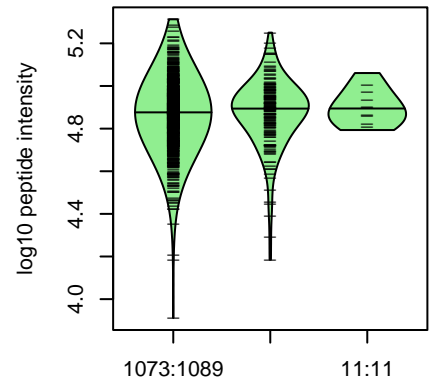

5:127874149:G:C\_C  
p = 0.51, beta = 0.0493, N = 1243

**GNVCGSR pc2  
D6RJI3;E9PHW4;F6U495;P35555;P35556**

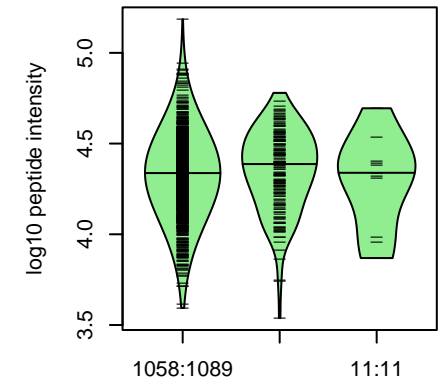

5:127874149:G:C\_C  
p = 0.17, beta = 0.103, N = 1224

**FBN2 : NP5  
P35556**

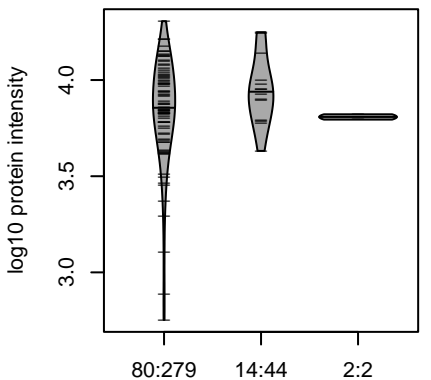

5:127874149:G:C\_C  
p = 0.18, beta = 0.302, N = 96

**PGICENGR pc2  
P35555;P35556**

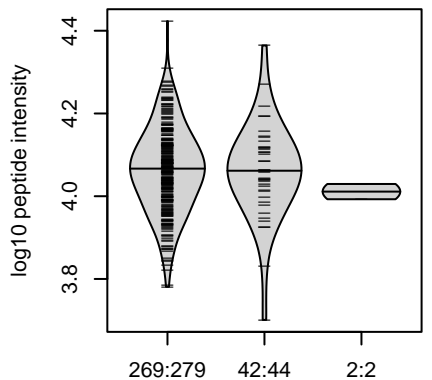

5:127874149:G:C\_C  
p = 0.69, beta = -0.0604, N = 313

**VCVDTHMR pc2  
D6RJI3;P35555;P35556**

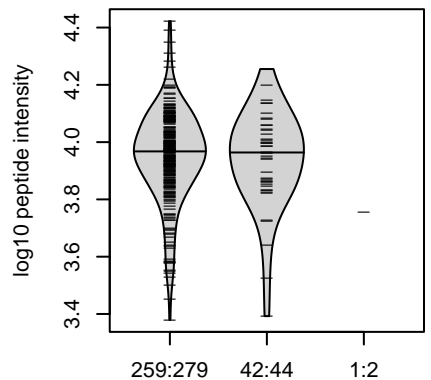

5:127874149:G:C\_C  
p = 0.48, beta = -0.111, N = 302

**NCMDIDECERNPLLCR pc3  
D6REJ2;D6RJI3;P35556**

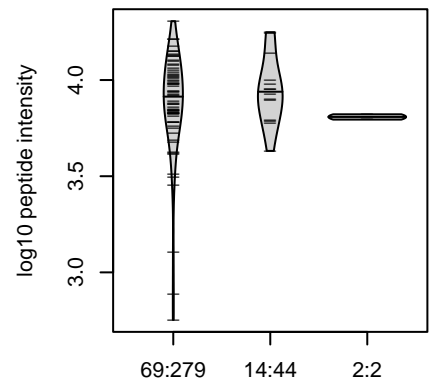

5:127874149:G:C\_C  
p = 0.56, beta = 0.133, N = 85

**TLPGGNQCIVPICR pc2  
E9PHW4;F6U495;P35555;P35556**

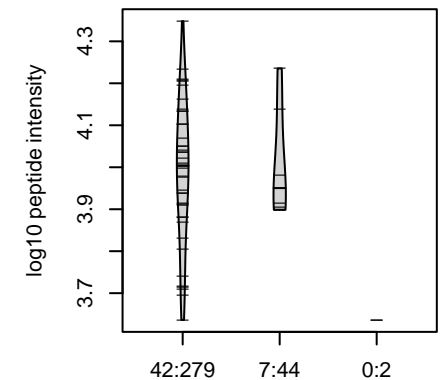

5:127874149:G:C\_C  
p = 0.66, beta = 0.174, N = 49

Assay Target: FBN2  
Olink UniProt: P35556  
UKB rsID: rs78821460  
Proxy rsID: rs78821460  
UKB SNP: 5:127874149:G:C  
Proxy SNP: 5:127874149:G:C  
UKB log10(p): 443  
UKB BETA: 0.523  
-----\*:\*:\*:\*:\*-----  
1257:1255:1243:1224:1113:107



**ANGPTL4 : NP3  
Q9BY76**

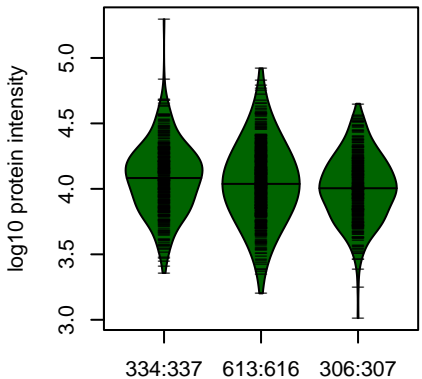

19:8431581:G:A\_G  
p = 0.00038, beta = -0.14, N = 1253

**AGFGDPHGFWLGLEK pc3  
Q9BY76;Q9BY76-2**

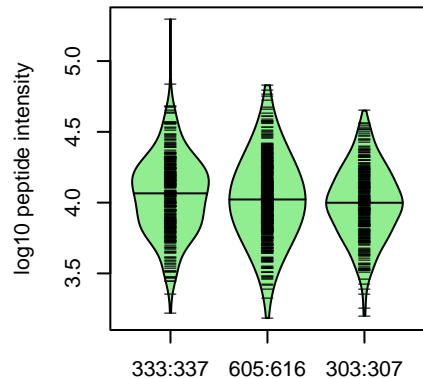

19:8431581:G:A\_G  
p = 0.0036, beta = -0.115, N = 1241

**MTSDGGWTVIQR pc2  
Q9BY76**

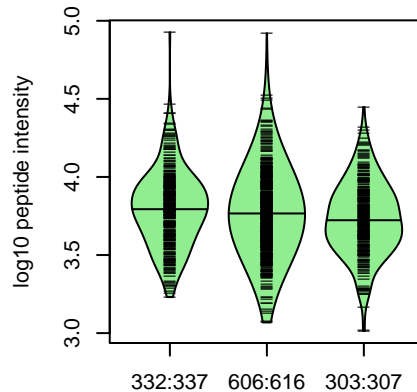

19:8431581:G:A\_G  
p = 0.00072, beta = -0.133, N = 1241

**VDPEVLHSLQTQLK pc3  
Q9BY76;Q9BY76-2**

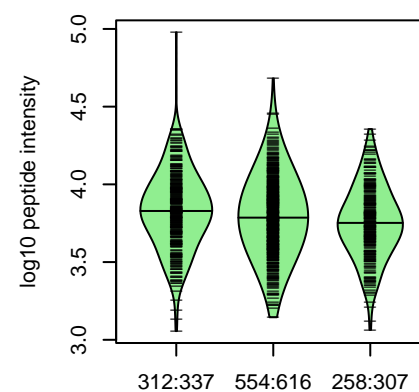

19:8431581:G:A\_G  
p = 0.00011, beta = -0.161, N = 1124

**DCQELFQVGER pc2  
Q9BY76**

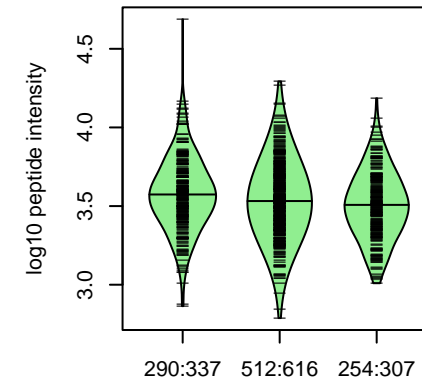

19:8431581:G:A\_G  
p = 9.7e-05, beta = -0.166, N = 1056

**ANGPTL4 : NP3  
Q9BY76**

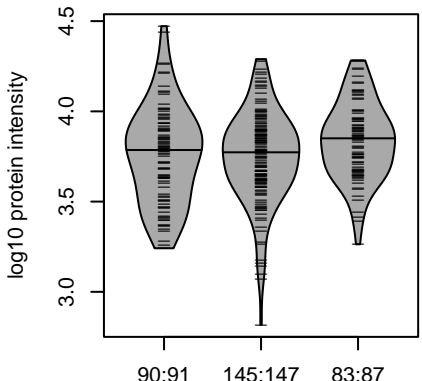

19:8431581:G:A\_A  
p = 0.24, beta = 0.0878, N = 318

**AGFGDPHGFWLGLEK pc3  
Q9BY76;Q9BY76-2**

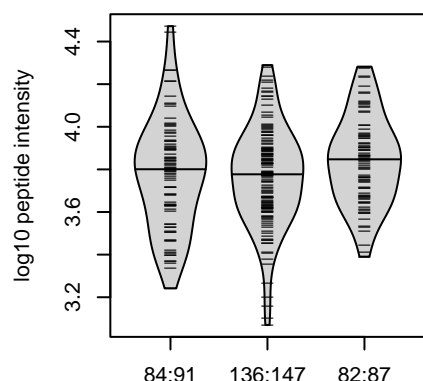

19:8431581:G:A\_A  
p = 0.43, beta = 0.061, N = 302

**IQHLQSQFGLLDHK pc3  
Q9BY76;Q9BY76-2**

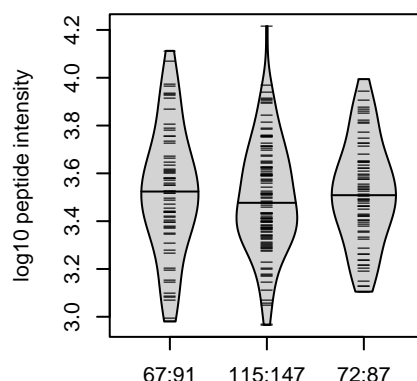

19:8431581:G:A\_A  
p = 0.52, beta = -0.0544, N = 254

**MTSDGGWTVIQR pc2  
Q9BY76**

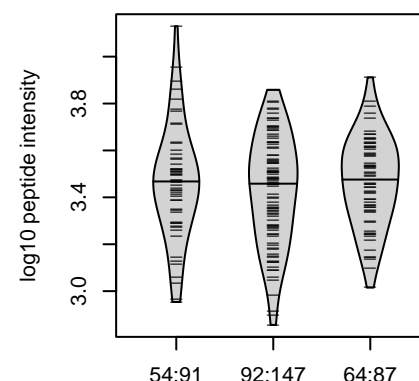

19:8431581:G:A\_A  
p = 0.97, beta = -0.00361, N = 210

**VDPEVLHSLQTQLK pc3  
Q9BY76;Q9BY76-2**

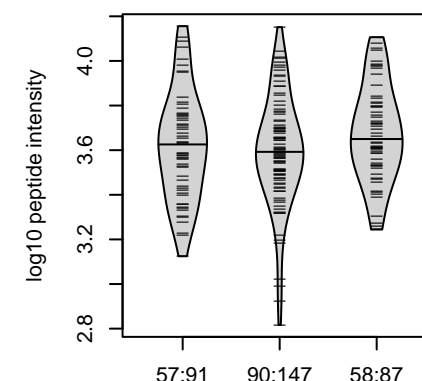

19:8431581:G:A\_A  
p = 0.18, beta = 0.123, N = 205

**VHSITGDR pc2  
rs1044250 REF**

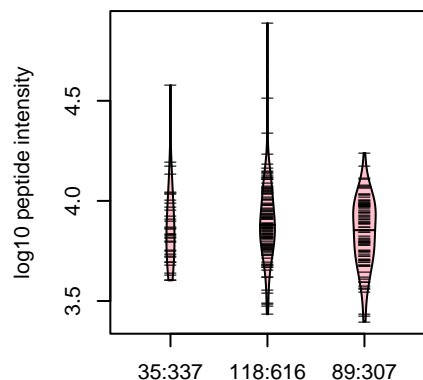

19:8431581:G:A\_G  
p = 6.8e-07, model = REC, N = 242

Assay Target: ANGPTL4  
Olink UniProt: Q9BY76  
UKB rsID: rs2278236  
Proxy rsID: rs2278236  
UKB SNP: 19:8431581:G:A  
Proxy SNP: 19:8431581:G:A  
UKB log10(p): 437  
UKB BETA: 0.271  
\*:\*:\*:\*:-:-:-:NA:NA  
1241:1241:1124:1056:1041:531



**APOL1 : NP4  
O14791**

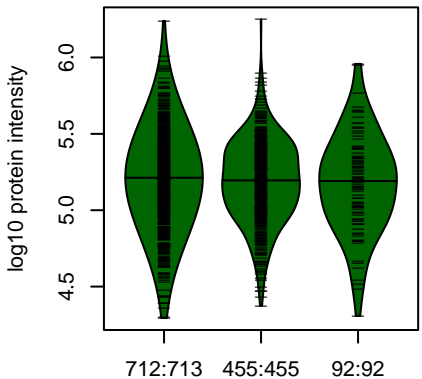

22:36661330:G:A\_G  
p = 0.53, beta = -0.028, N = 1259

**VNEPSILEMSR pc2  
O14791;O14791-2;O14791-3**

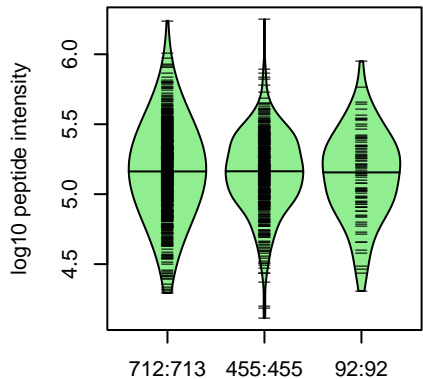

22:36661330:G:A\_G  
p = 0.43, beta = -0.035, N = 1259

**WWTQAQAHDLVIK pc3  
O14791;O14791-2;O14791-3**

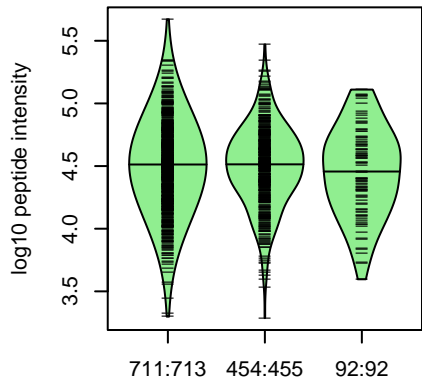

22:36661330:G:A\_G  
p = 0.72, beta = -0.0161, N = 1257

**VTEPISAESGEQVER pc2  
O14791;O14791-2;O14791-3**

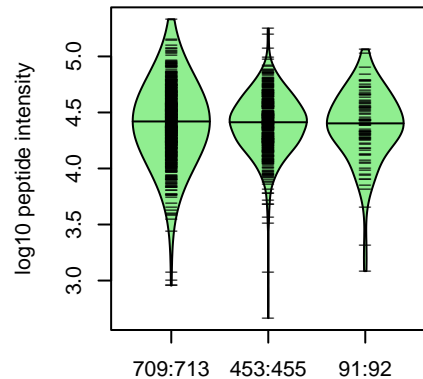

22:36661330:G:A\_G  
p = 0.39, beta = -0.0385, N = 1253

**LNILNNNYK pc2  
O14791;O14791-2;O14791-3**

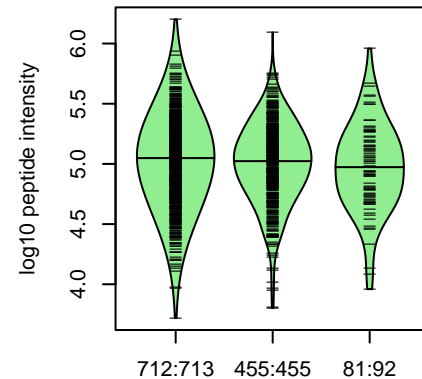

22:36661330:G:A\_G  
p = 0.2, beta = -0.0581, N = 1248

**APOL1 : NP4  
O14791**

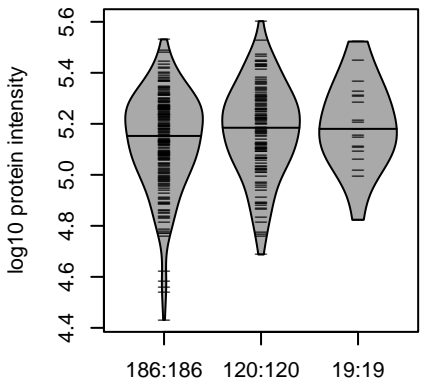

22:36661330:G:A\_G  
p = 0.025, beta = 0.203, N = 325

**LNILNNNYK pc2  
O14791;O14791-2;O14791-3**

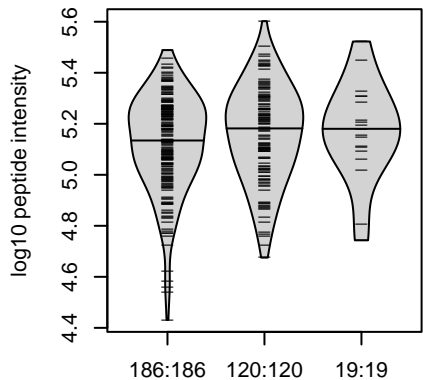

22:36661330:G:A\_G  
p = 0.033, beta = 0.192, N = 325

**NEADELRK pc2  
O14791;O14791-2;O14791-3**

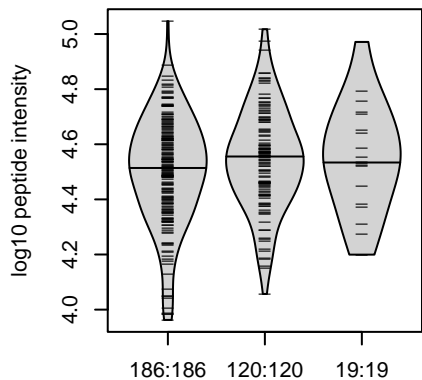

22:36661330:G:A\_G  
p = 0.014, beta = 0.223, N = 325

**VTEPISAESGEQVER pc2  
O14791;O14791-2;O14791-3**

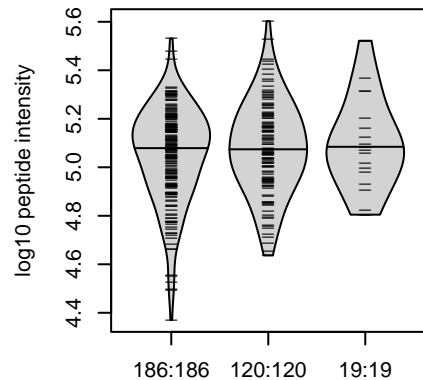

22:36661330:G:A\_G  
p = 0.18, beta = 0.12, N = 325

**WWTQAQAHDLVIK pc3  
O14791;O14791-2;O14791-3**

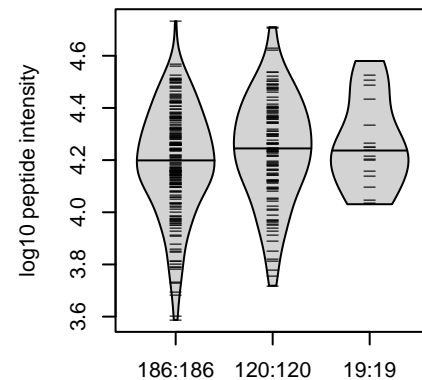

22:36661330:G:A\_G  
p = 0.019, beta = 0.212, N = 325

Assay Target: APOL1  
Olink UniProt: O14791  
UKB rsID: rs2239785  
Proxy rsID: rs2239785  
UKB SNP: 22:36661330:G:A  
Proxy SNP: 22:36661330:G:A  
UKB log10(p): 436.1  
UKB BETA: -0.306  
-----\*-----  
1259:1257:1253:1248:1244:124

**SELEDNIR pc2  
rs2239785 REF**

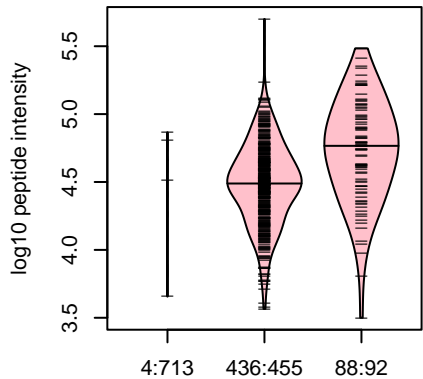

22:36661330:G:A\_G  
p = 8.6016828940961e-321, model = REC, N =

**SELEDNIRR pc2  
rs2239785 REF**

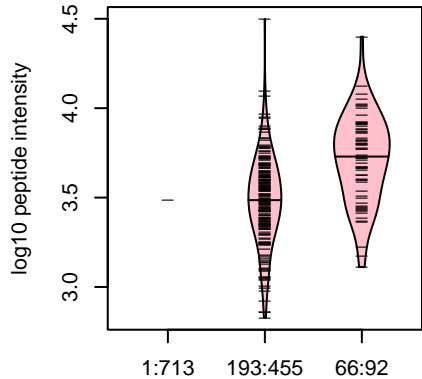

22:36661330:G:A\_G  
p = 5e-112, model = REC, N = 260

**SKLEDNIR pc2  
rs2239785 ALT**

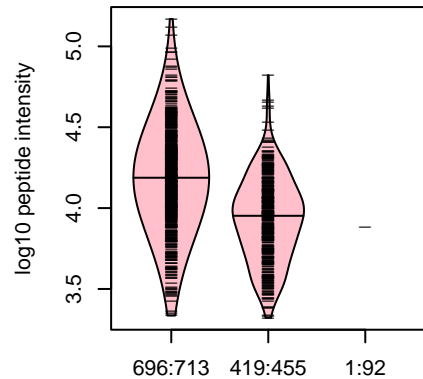

22:36661330:G:A\_G  
p = 2.3e-99, model = DOM, N = 1116

**LEDNIRR pc2  
rs2239785 ALT**

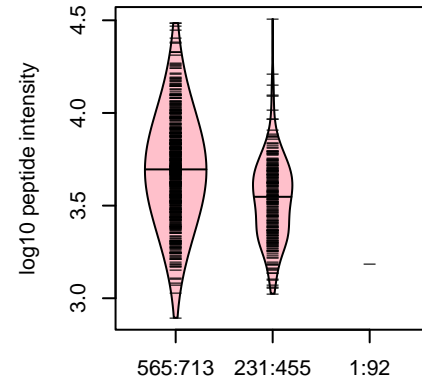

22:36661330:G:A\_G  
p = 1.7e-41, model = REC, N = 797

**NCAM1 : NP2**  
**P13591**

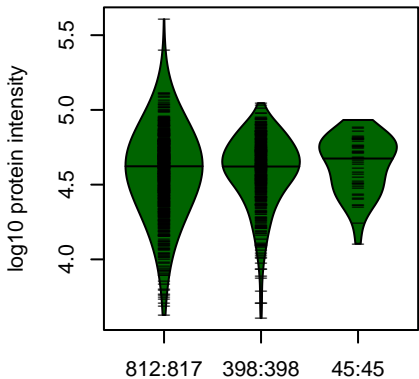

11:112975934:C:T\_T  
p = 0.69, beta = 0.0204, N = 1255

**FFLCQVAGDAK pc2**

**0A087WWD4;A0A087WX77;H7BYX6;0A087WWD4;A0A087WX77;H7BYX6;V75;A0A087WWD4;A0A087WX77;H7B0A087WWD4;A0A087WX77;H7BYX6;**

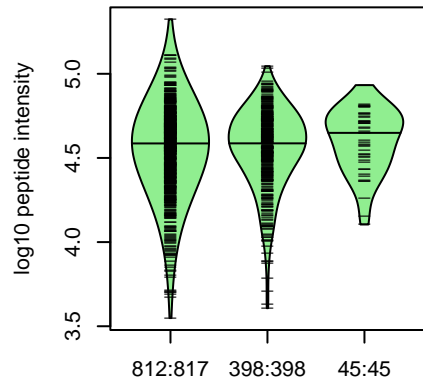

11:112975934:C:T\_T  
p = 0.47, beta = 0.0362, N = 1255

**YIFSDSSQLTIK pc2**

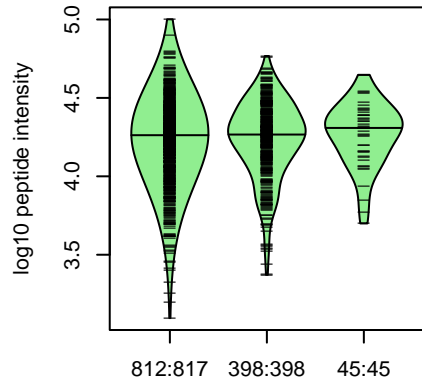

11:112975934:C:T\_T  
p = 0.98, beta = -0.00101, N = 1255

**EASMEGIVTIVGLKPETTYAVR pc3**

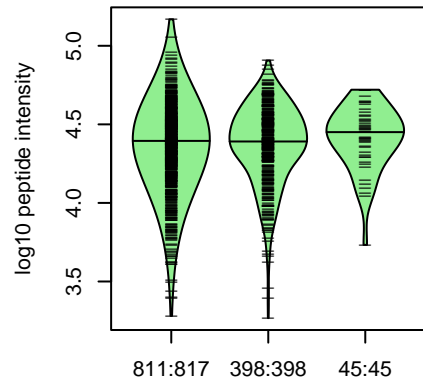

11:112975934:C:T\_T  
p = 0.55, beta = 0.0301, N = 1254

**FIVLSNYYLQIR pc2**

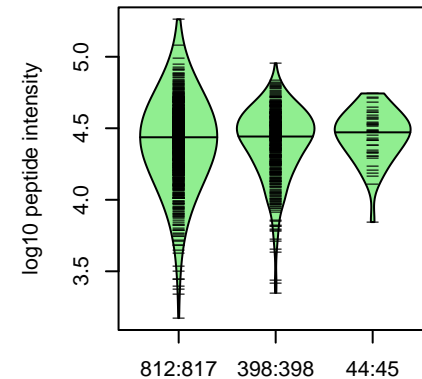

11:112975934:C:T\_T  
p = 0.85, beta = -0.0097, N = 1254

**NCAM1 : NP2**  
**P13591**

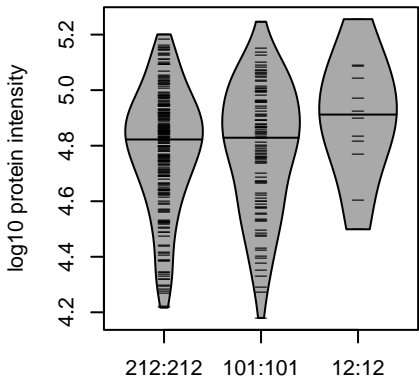

11:112975934:C:T\_T  
p = 0.47, beta = 0.0703, N = 325

**AGEQDATIHLK pc2**

**0A087WWD4;A0A087WX77;H7BYX6;V75;A0A087WWD4;A0A087WX77;H7B;V75;A0A087WWD4;A0A087WX77;H7B;V75;A0A087WWD4;A0A087WX77;H7B**

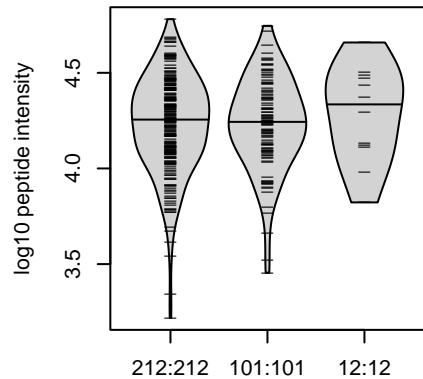

11:112975934:C:T\_T  
p = 0.94, beta = 0.00761, N = 325

**ALSSEWKPEIR pc3**

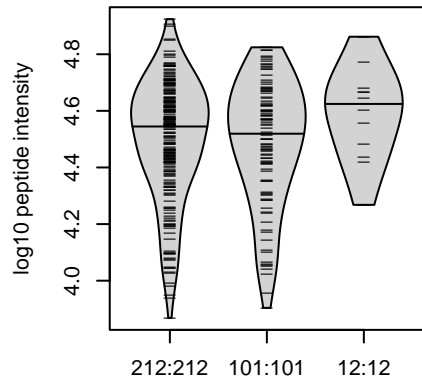

11:112975934:C:T\_T  
p = 0.96, beta = 0.00499, N = 325

**AVGEEVWHSK pc2**

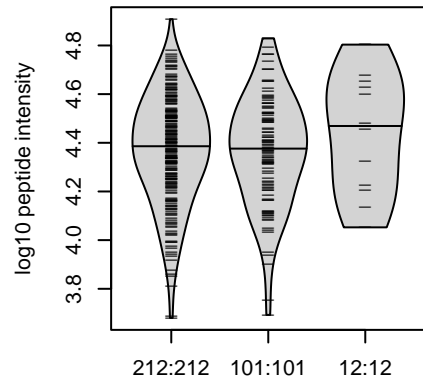

11:112975934:C:T\_T  
p = 0.86, beta = 0.0169, N = 325

**EASMEGIVTIVGLKPETTYAVR pc3**

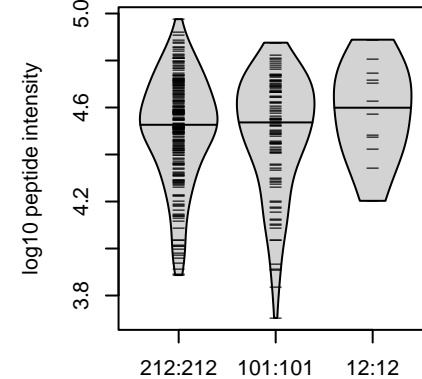

11:112975934:C:T\_T  
p = 0.65, beta = -0.0441, N = 325

Assay Target: NCAM1  
Olink UniProt: P13591  
UKB rsID: rs11214489  
Proxy rsID: rs11214489  
UKB SNP: 11:112975934:C:T  
Proxy SNP: 11:112975934:C:T  
UKB log10(p): 432.7  
UKB BETA: -0.332  
-----  
1255:1255:1254:1254:1244:124



**LGALS1 : NP2**  
**P09382**

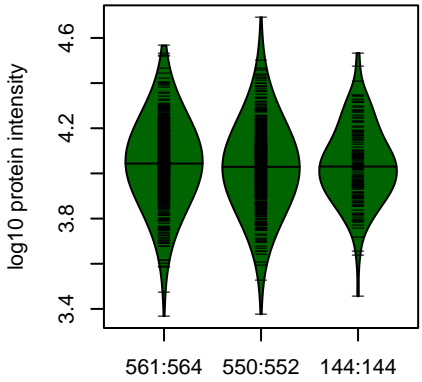

22:38071043:G:A\_A  
p = 0.36, beta = -0.0381, N = 1255

**SFVLNLGK pc2**  
**P09382**

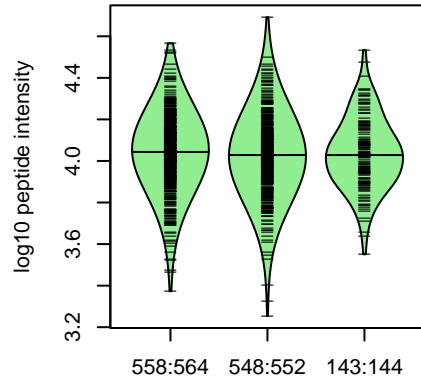

22:38071043:G:A\_A  
p = 0.44, beta = -0.0323, N = 1249

**FNAHGDANTIVCNSK pc3**  
**P09382**

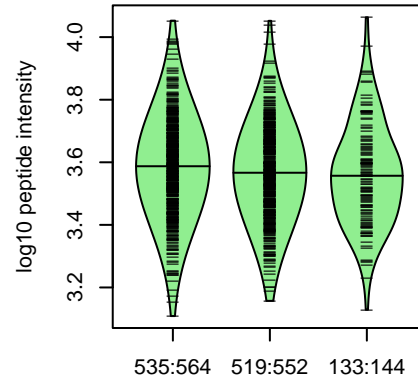

22:38071043:G:A\_A  
p = 0.098, beta = -0.0714, N = 1187

**LNLEAINYMAADGDFK pc2**  
**P09382**

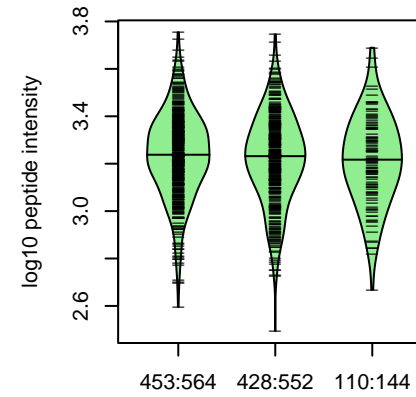

22:38071043:G:A\_A  
p = 0.35, beta = -0.044, N = 991

**VRGEVAPDAK pc2**  
**F8WEI7;P09382**

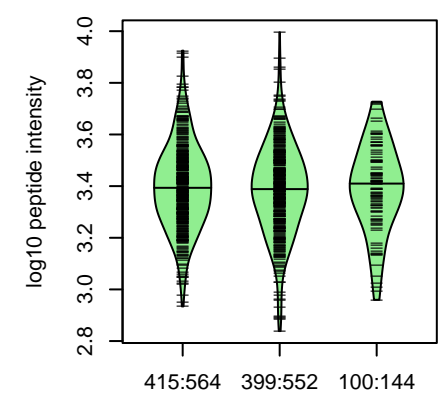

22:38071043:G:A\_A  
p = 0.46, beta = -0.0364, N = 914

**LGALS1 : NP2**  
**P09382**

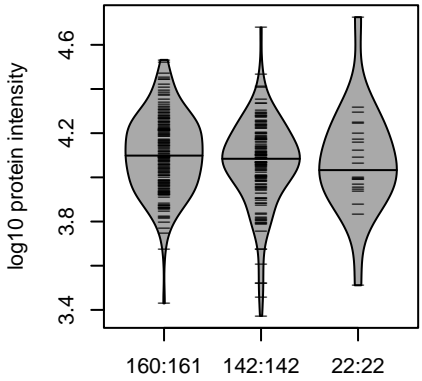

22:38071043:G:A\_A  
p = 0.068, beta = -0.162, N = 324

**FNAHGDANTIVCNSK pc3**  
**P09382**

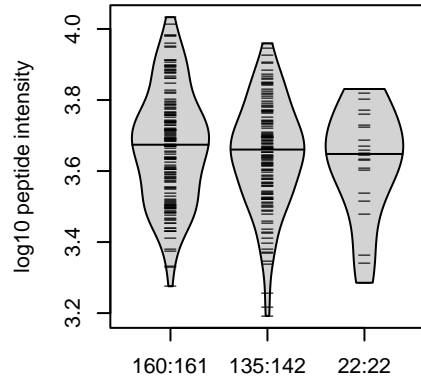

22:38071043:G:A\_A  
p = 0.077, beta = -0.158, N = 317

**SFVLNLGK pc2**  
**P09382**

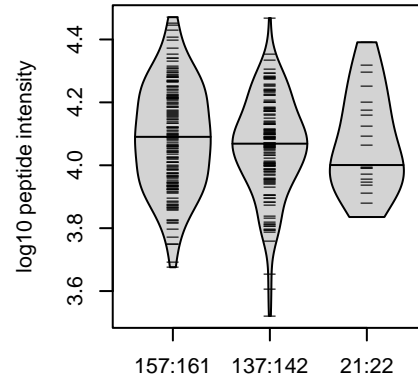

22:38071043:G:A\_A  
p = 0.13, beta = -0.138, N = 315

**DSNNLCLHFNPR pc3**  
**P09382**

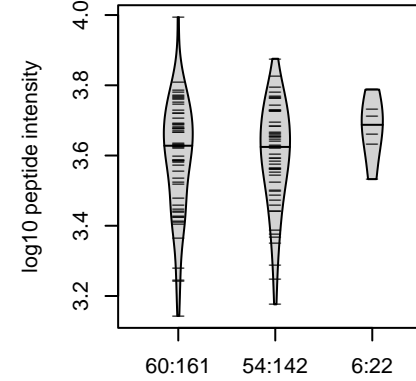

22:38071043:G:A\_A  
p = 0.5, beta = 0.102, N = 120

**LNLEAINYMAADGDFK pc2**  
**P09382**

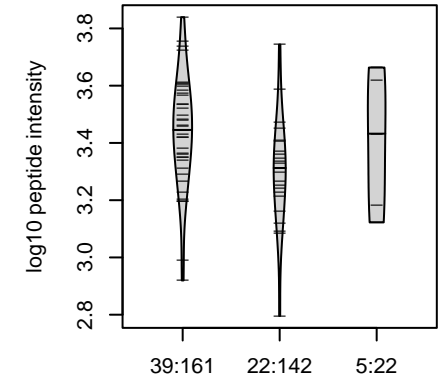

22:38071043:G:A\_A  
p = 0.11, beta = -0.298, N = 66

Assay Target: LGALS1  
Olink UniProt: P09382  
UKB rsID: rs4820294  
Proxy rsID: rs4820294  
UKB SNP: 22:38071043:G:A  
Proxy SNP: 22:38071043:G:A  
UKB log10(p): 413  
UKB BETA: -0.279  
-----\*-----  
1249:1187:991:914:730:664:123



**MYOC : NP2  
Q99972**

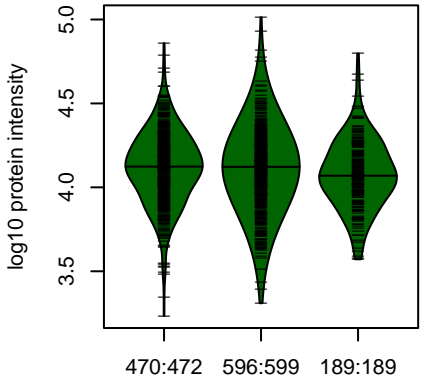

1:171616521:G:A\_G  
p = 0.12, beta = -0.0627, N = 1255

**ELETAYSNLLR pc2  
Q99972**

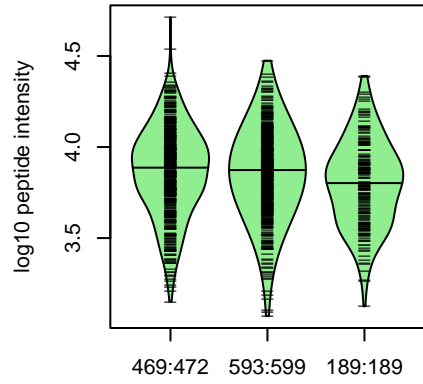

1:171616521:G:A\_G  
p = 0.016, beta = -0.0982, N = 1251

**YELNTETVK pc2  
Q99972**

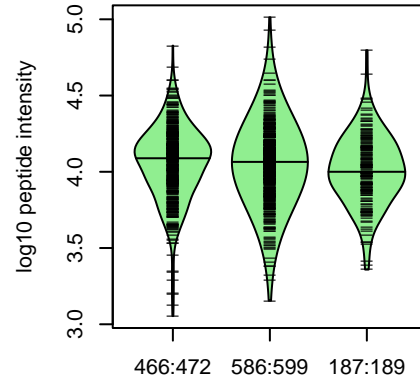

1:171616521:G:A\_G  
p = 0.084, beta = -0.0708, N = 1239

**SELTEVPASR pc2  
Q99972**

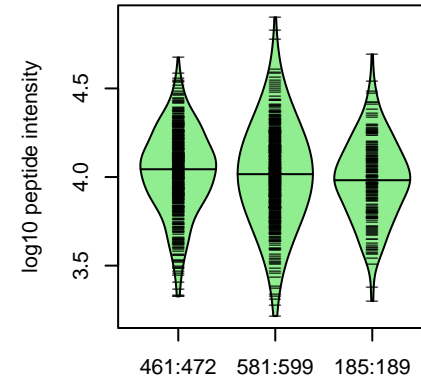

1:171616521:G:A\_G  
p = 0.08, beta = -0.0722, N = 1227

**YSSMIDYNPLEK pc2  
Q99972**

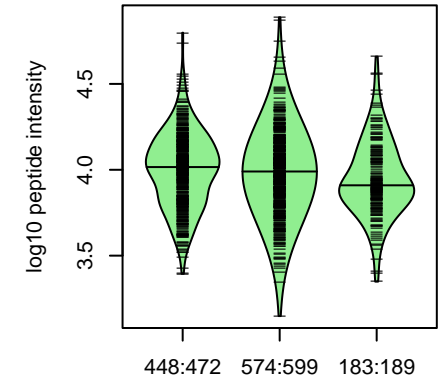

1:171616521:G:A\_G  
p = 0.037, beta = -0.0867, N = 1205

**MYOC : NP2  
Q99972**

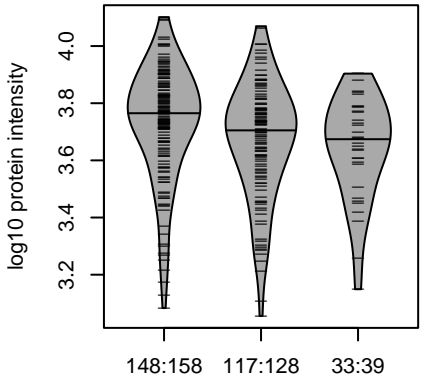

1:171616521:G:A\_G  
p = 0.0024, beta = -0.254, N = 298

**ELETAYSNLLR pc2  
Q99972**

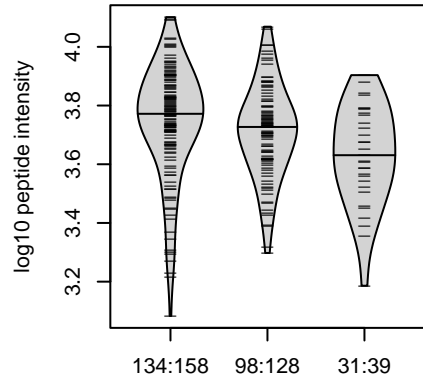

1:171616521:G:A\_G  
p = 0.00085, beta = -0.292, N = 263

**YELNTETVK pc2  
Q99972**

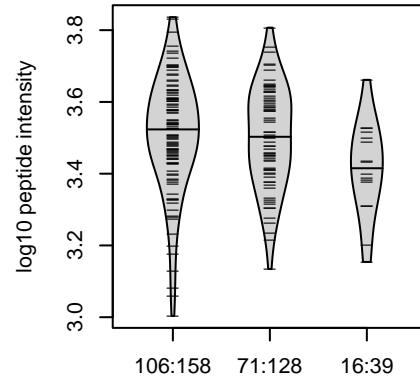

1:171616521:G:A\_G  
p = 0.033, beta = -0.233, N = 193

**IDTVGTDVR pc2  
Q99972**

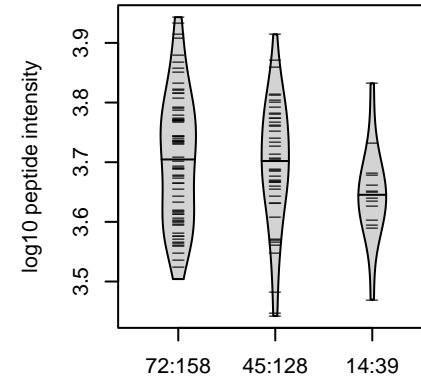

1:171616521:G:A\_G  
p = 0.094, beta = -0.21, N = 131

**LEAWDNLNMVTDYDIK pc2  
Q99972**

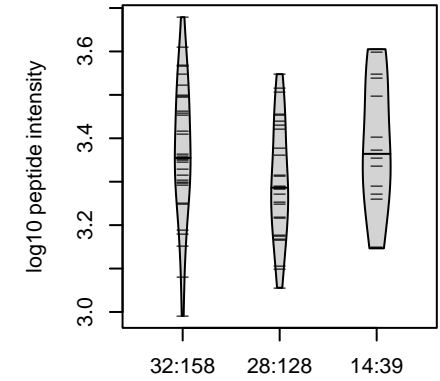

1:171616521:G:A\_G  
p = 0.65, beta = -0.0685, N = 74

Assay Target: MYOC  
Olink UniProt: Q99972  
UKB rsID: rs171003  
Proxy rsID: rs171003  
UKB SNP: 1:171616521:G:A  
Proxy SNP: 1:171616521:G:A  
UKB log10(p): 404.1  
UKB BETA: 0.255  
-----  
1251:1239:1227:1205:1191:114

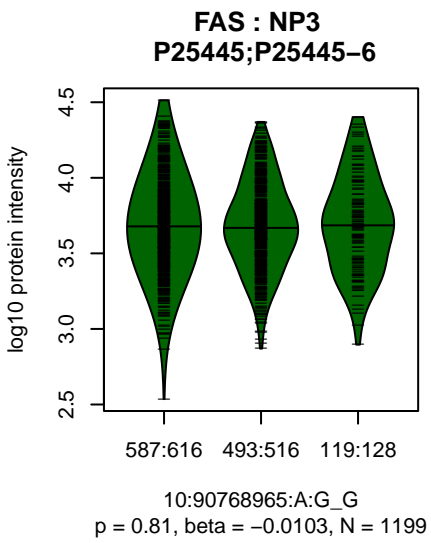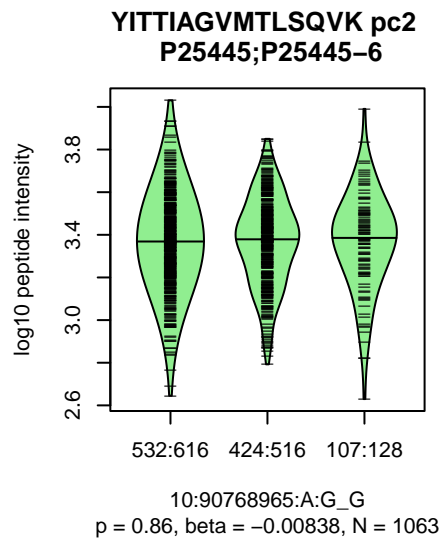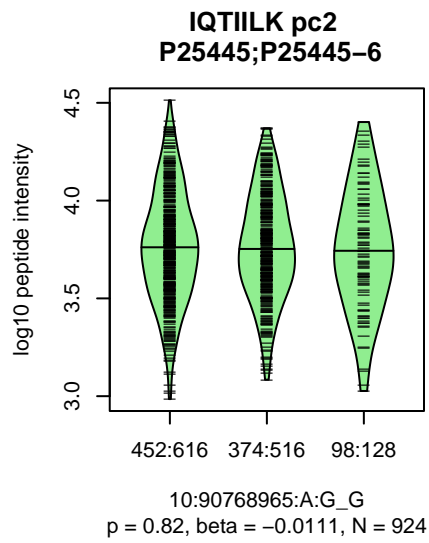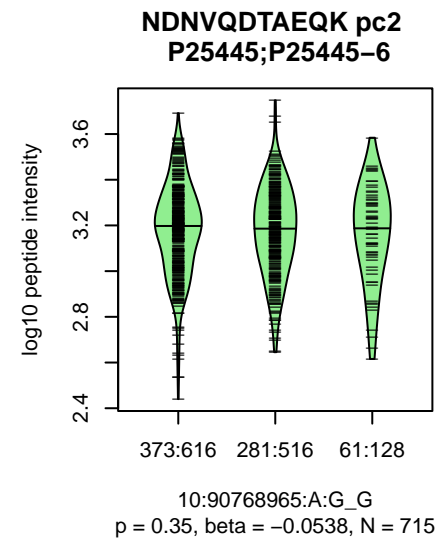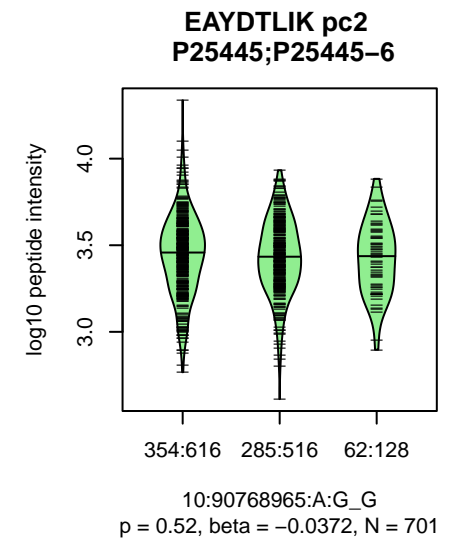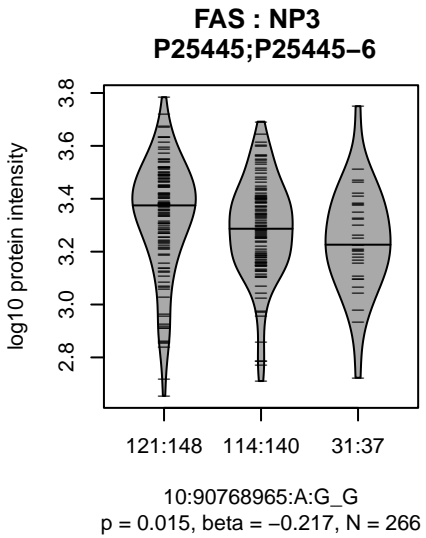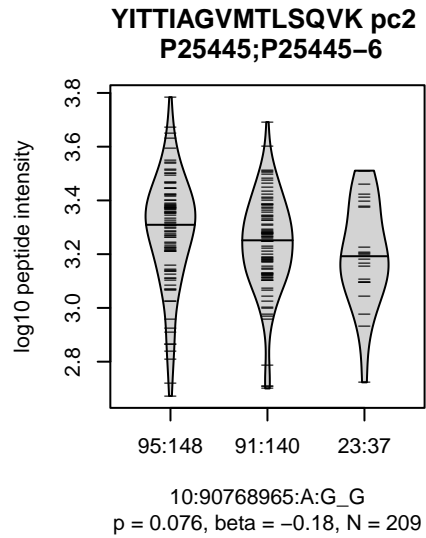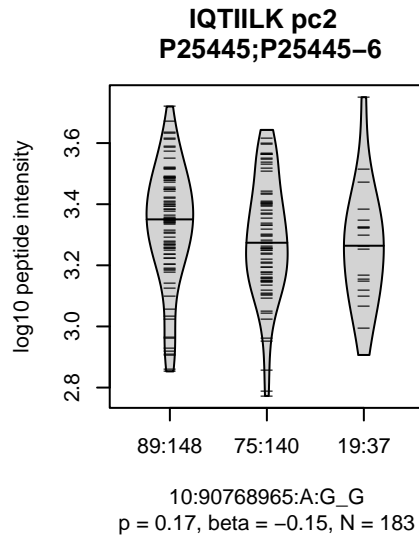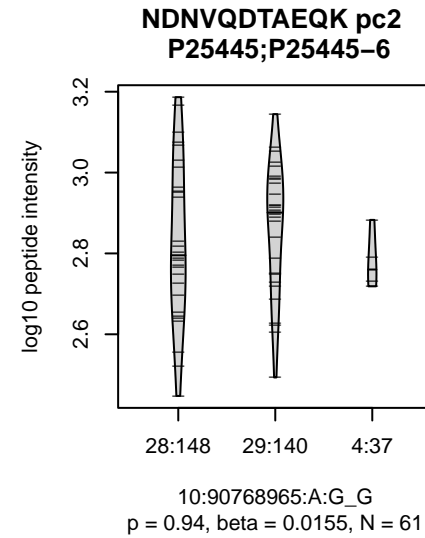

Assay Target: FAS  
 Olink UniProt: P25445  
 UKB rsID: rs7911226  
 Proxy rsID: rs7911226  
 UKB SNP: 10:90768965:A:G  
 Proxy SNP: 10:90768965:A:G  
 UKB log10(p): 399.8  
 UKB BETA: -0.26  
 -:-:-:-  
 1063:924:715:701

**HYAL1 : NP5**  
**Q12794**

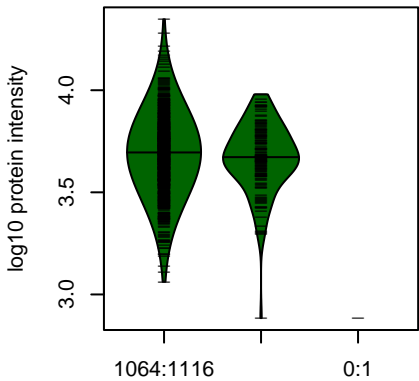

3:50339622:C:T\_T  
p = 0.25, beta = -0.104, N = 1204

**AWMAGTLQLGR pc2**  
**Q12794;Q12794-2**

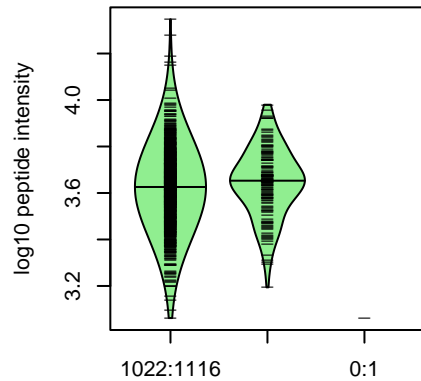

3:50339622:C:T\_T  
p = 0.17, beta = 0.125, N = 1160

**AQNDQLGWLWGQSR pc2**  
**Q12794-3;Q12794;Q12794-2**

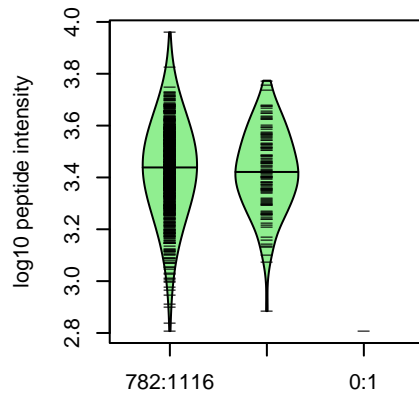

3:50339622:C:T\_T  
p = 0.84, beta = -0.0196, N = 898

**ALYPSIYMPAVLEGTK pc2**  
**Q12794-3;Q12794;Q12794-2**

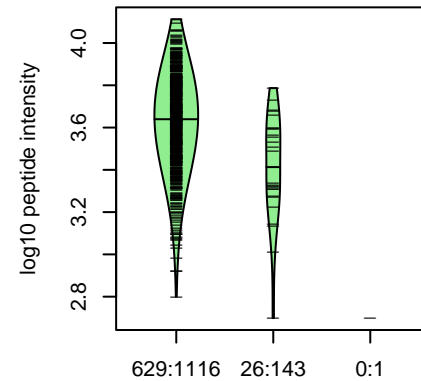

3:50339622:C:T\_T  
p = 1e-05, beta = -0.871, N = 655

**HGVDVDVSVFDVVANPGQTFR pc3**  
**Q12794;Q12794-2**

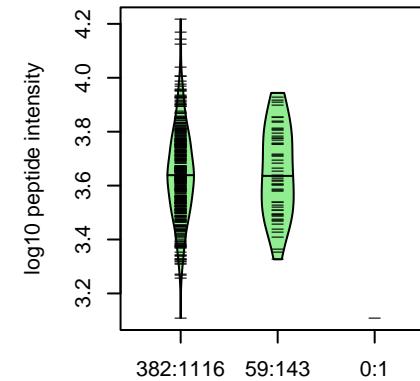

3:50339622:C:T\_T  
p = 0.62, beta = 0.0681, N = 441

**HYAL1 : NP5**  
**Q12794;Q12794-2**

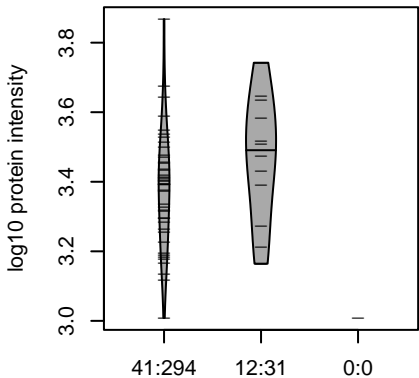

3:50339622:C:T\_T  
p = 0.13, beta = 0.466, N = 53

**AQNDQLGWLWGQSR pc2**  
**Q12794-3;Q12794;Q12794-2**

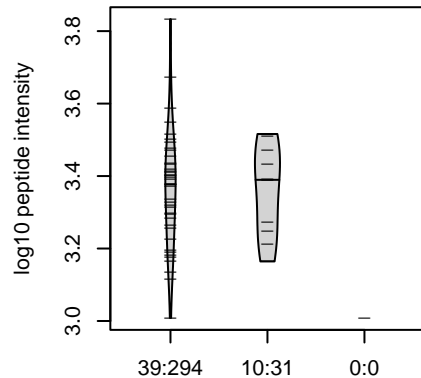

3:50339622:C:T\_T  
p = 0.79, beta = 0.0894, N = 49

Assay Target: HYAL1  
Olink UniProt: Q12794  
UKB rsID: rs116482870  
Proxy rsID: rs116482870  
UKB SNP: 3:50339622:C:T  
Proxy SNP: 3:50339622:C:T  
UKB log10(p): 398.1  
UKB BETA: -0.542  
-:-\*:-:-  
1160:898:655:441:146



**CD8A : NP3**  
**B8ZZZ4;P01732;P01732-2**

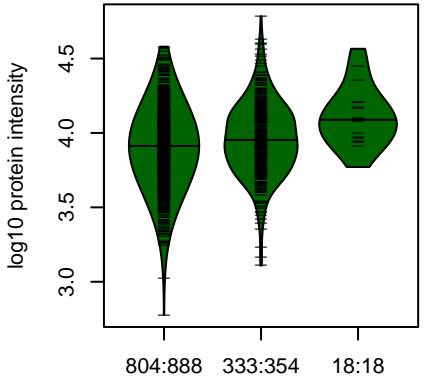

2:87016506:A:G\_G  
 $p = 3.9e-05$ ,  $\beta = 0.241$ ,  $N = 1155$

**TWNLGETVELK pc2**  
**B8ZZZ4;P01732;P01732-2**

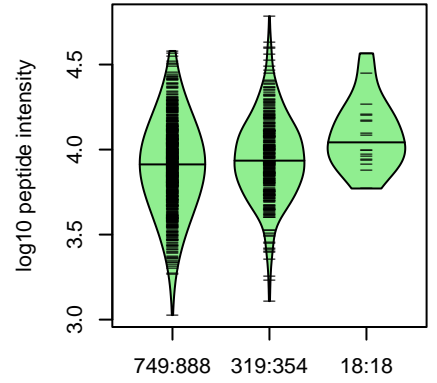

2:87016506:A:G\_G  
 $p = 0.00046$ ,  $\beta = 0.21$ ,  $N = 1086$

**AAEGLDTQR pc2**  
**B8ZZZ4;P01732;P01732-2**

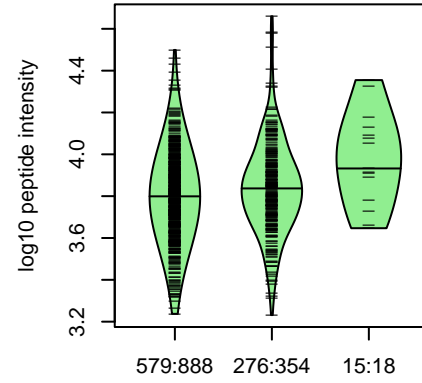

2:87016506:A:G\_G  
 $p = 0.0014$ ,  $\beta = 0.21$ ,  $N = 870$

**GAAASPTFLLYLSQNK pc2**  
**B8ZZZ4;P01732;P01732-2**

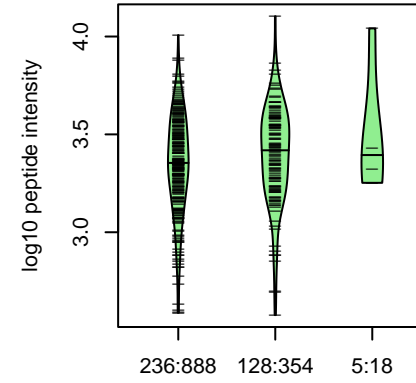

2:87016506:A:G\_G  
 $p = 0.1$ ,  $\beta = 0.164$ ,  $N = 369$

**CD8A : NP3**  
**P01732-2**

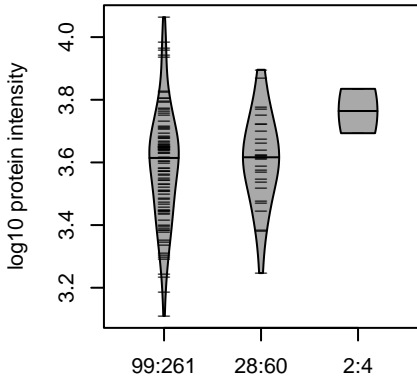

2:87016506:A:G\_G  
 $p = 0.29$ ,  $\beta = 0.193$ ,  $N = 129$

**TWNLGETVELK pc2**  
**B8ZZZ4;P01732;P01732-2**

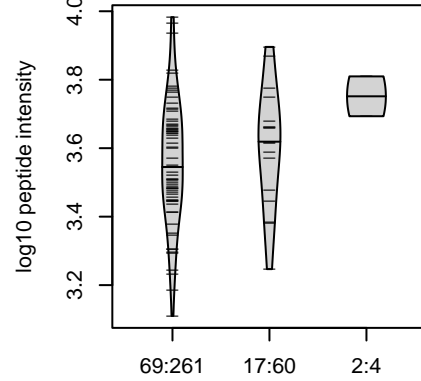

2:87016506:A:G\_G  
 $p = 0.17$ ,  $\beta = 0.297$ ,  $N = 88$

**AAEGLDTQR pc2**  
**B8ZZZ4;P01732;P01732-2**

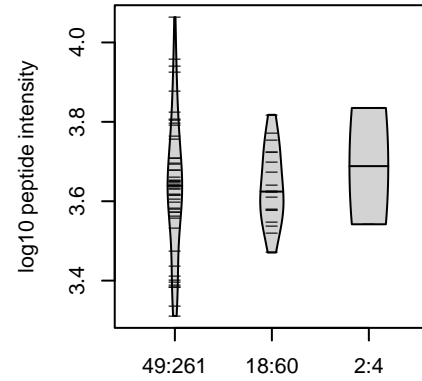

2:87016506:A:G\_G  
 $p = 0.91$ ,  $\beta = 0.0243$ ,  $N = 69$

Assay Target: CD8A  
Olink UniProt: P01732  
UKB rsID: rs3020726  
Proxy rsID: rs3020726  
UKB SNP: 2:87016506:A:G  
Proxy SNP: 2:87016506:A:G  
UKB log10(p): 383.5  
UKB BETA: 0.345  
\*.\*.-;--  
1086:870:369:65

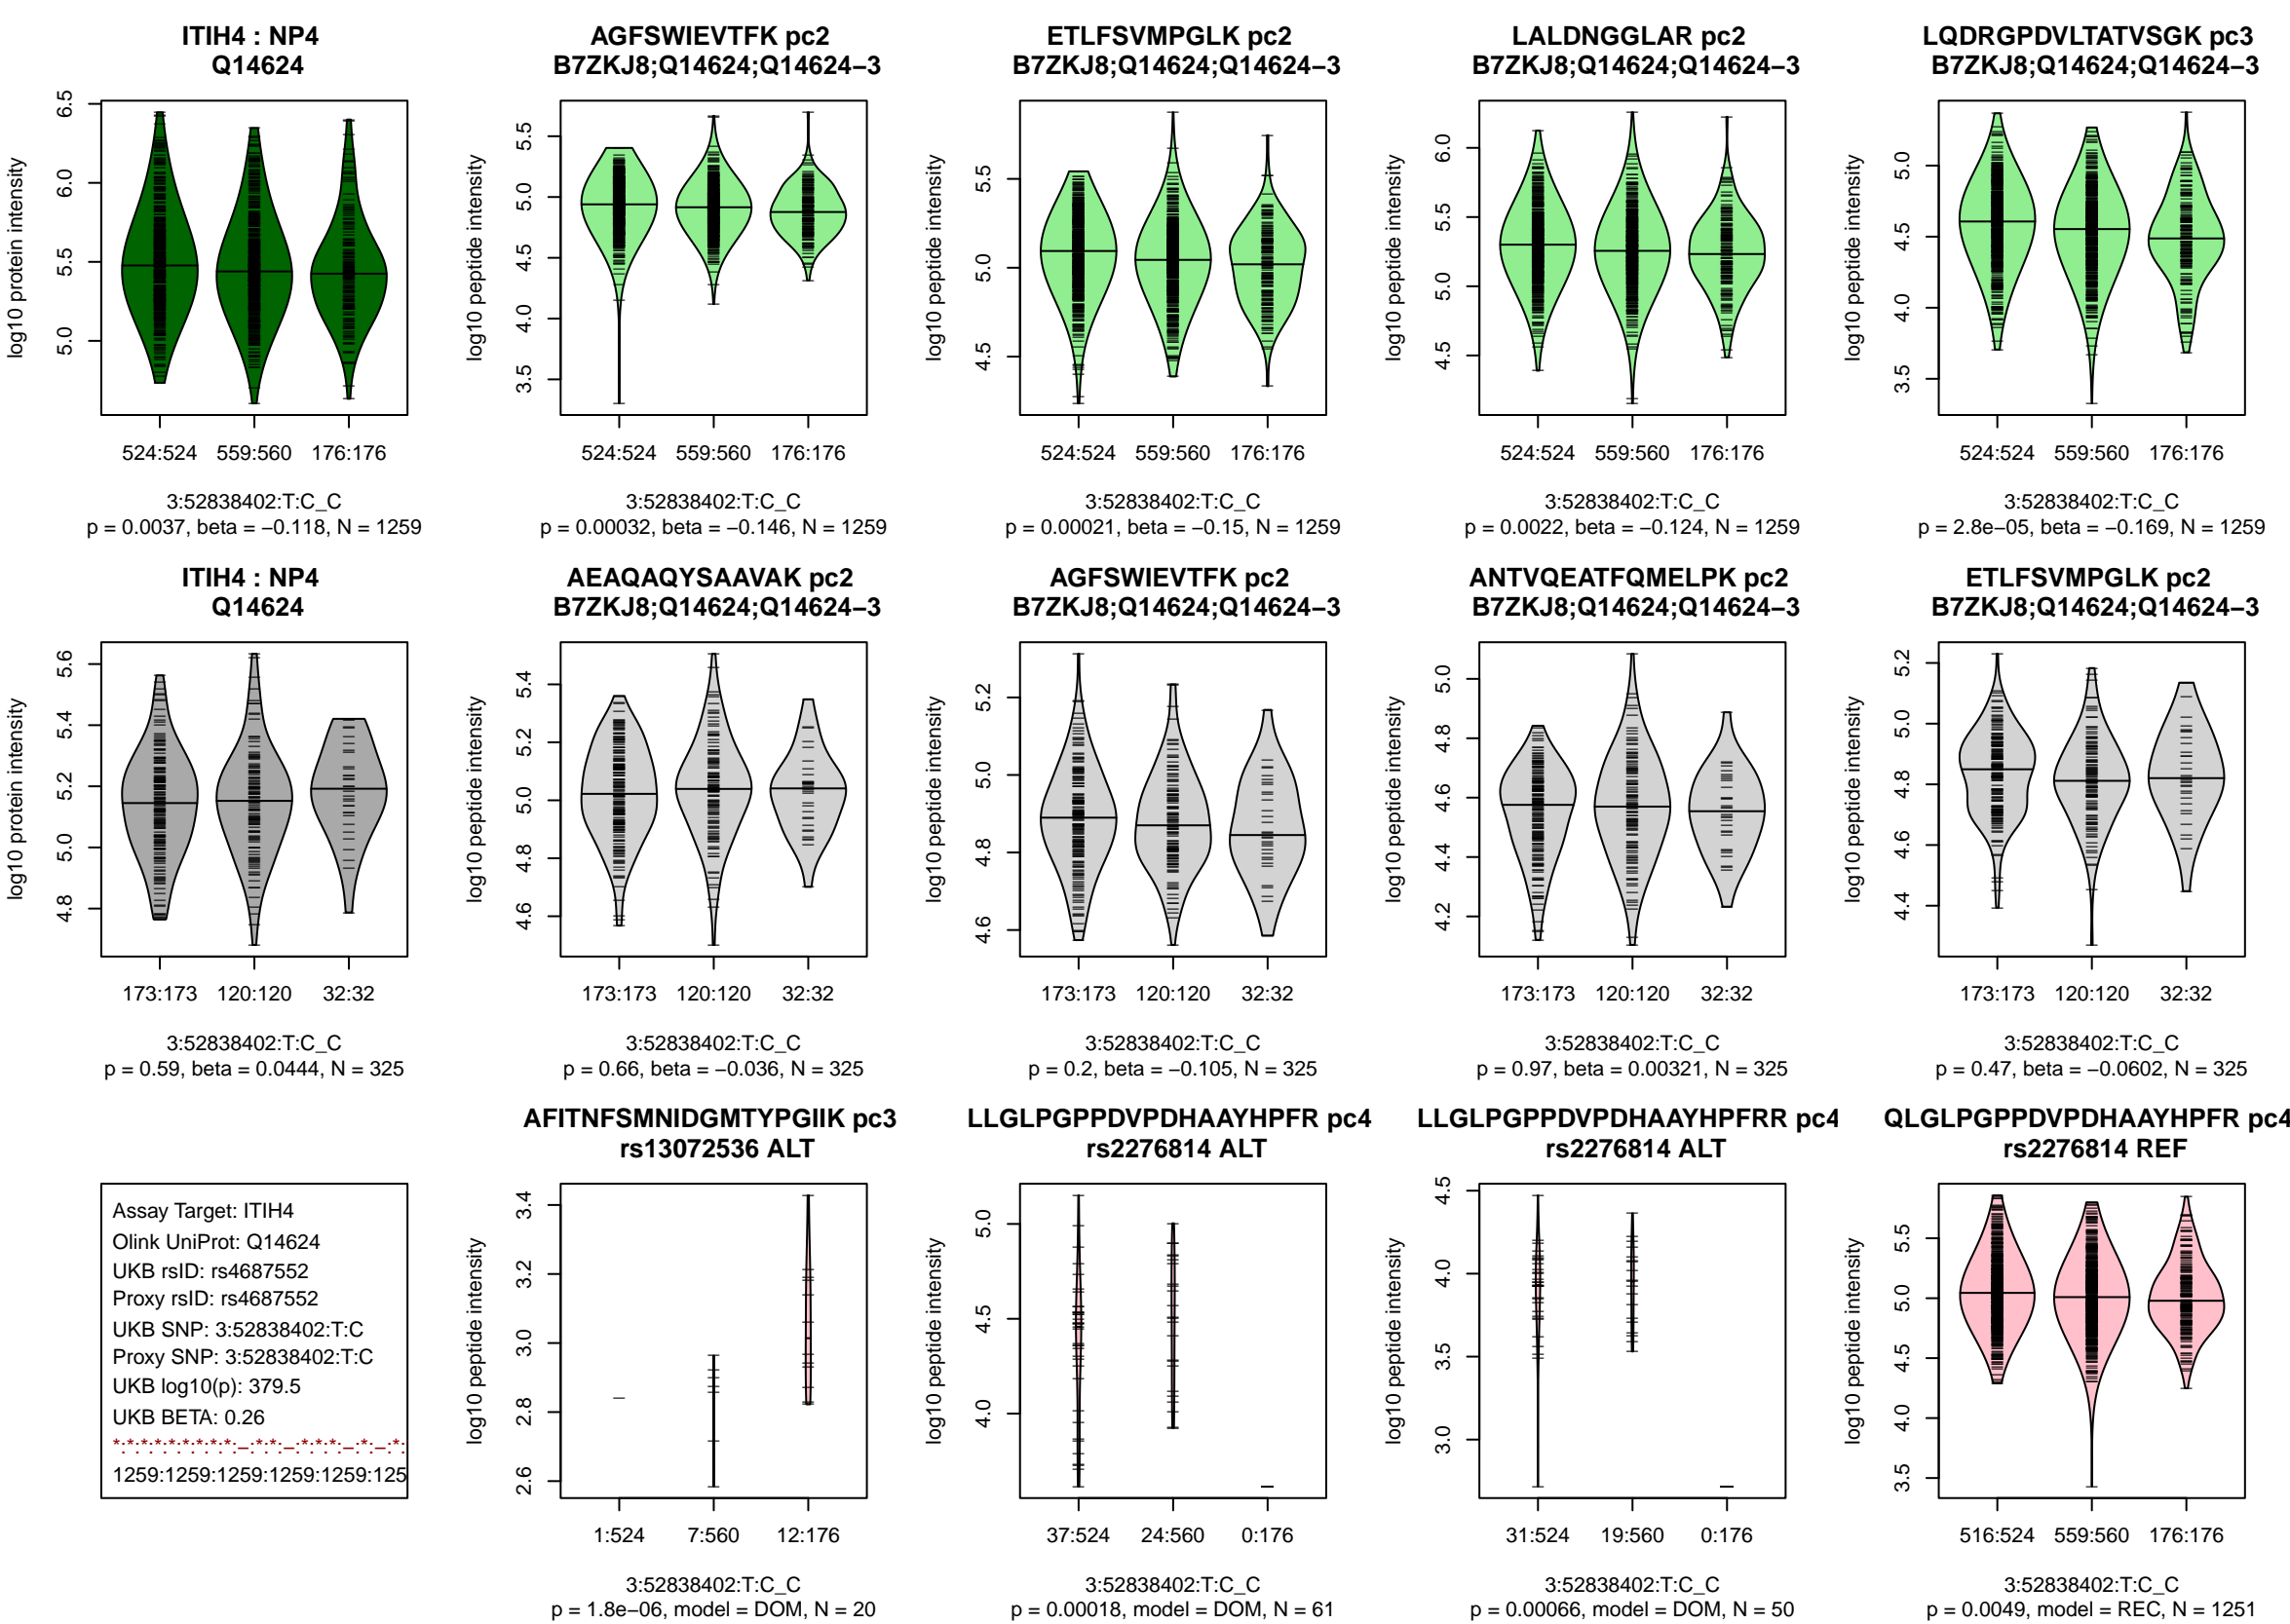

**CCN3 : NP4  
P48745**

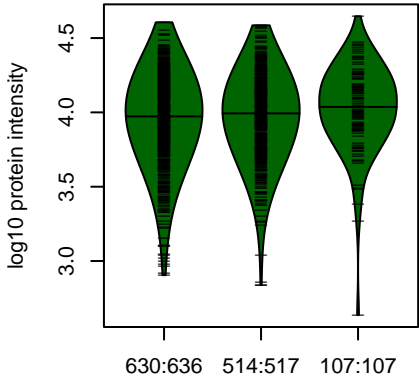

8:120429024:G:A\_A  
p = 0.032, beta = 0.0935, N = 1251

**FCGVCS DGR pc2  
P48745**

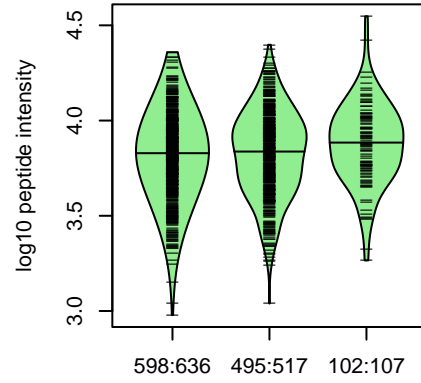

8:120429024:G:A\_A  
p = 0.021, beta = 0.103, N = 1195

**NNEAFLQELELK pc2  
P48745**

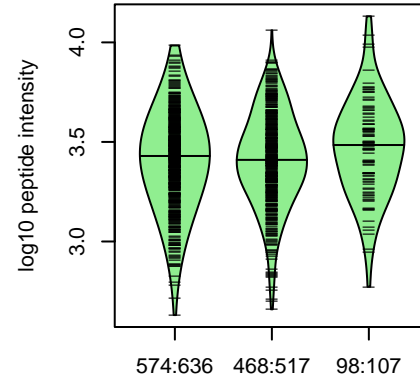

8:120429024:G:A\_A  
p = 0.077, beta = 0.0808, N = 1140

**AIHLQFK pc2  
P48745**

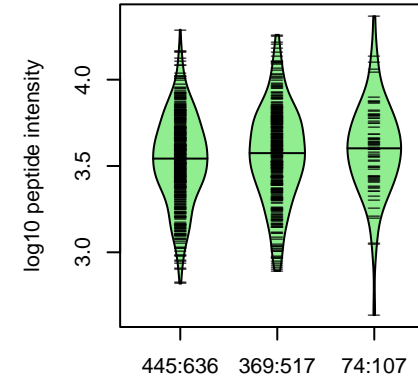

8:120429024:G:A\_A  
p = 0.052, beta = 0.101, N = 888

**DGQIGCVPR pc2  
P48745**

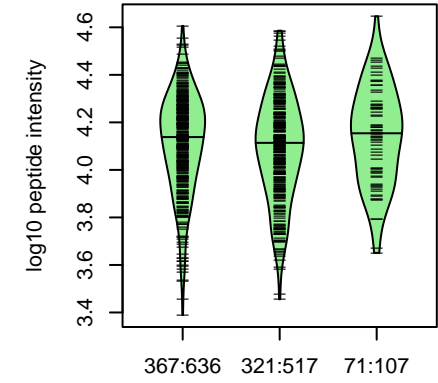

8:120429024:G:A\_A  
p = 0.45, beta = 0.0421, N = 759

**CCN3 : NP4  
P48745**

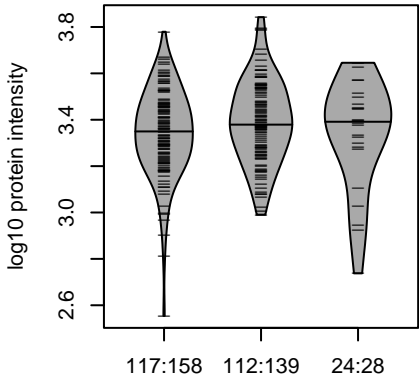

8:120429024:G:A\_A  
p = 0.3, beta = 0.098, N = 253

**NNEAFLQELELK pc2  
P48745**

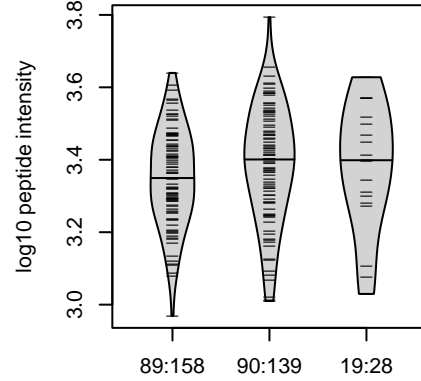

8:120429024:G:A\_A  
p = 0.12, beta = 0.167, N = 198

**CQLDVLLPEPNCAPR pc2  
P48745**

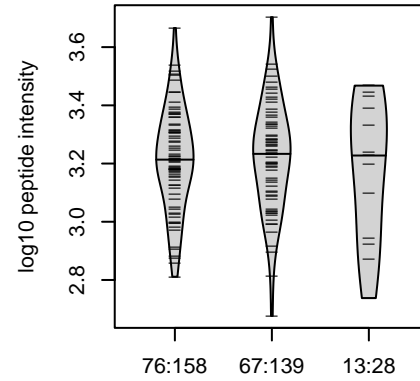

8:120429024:G:A\_A  
p = 0.96, beta = 0.00564, N = 156

**CPATPPTCAGVR pc2  
rs2279112 REF**

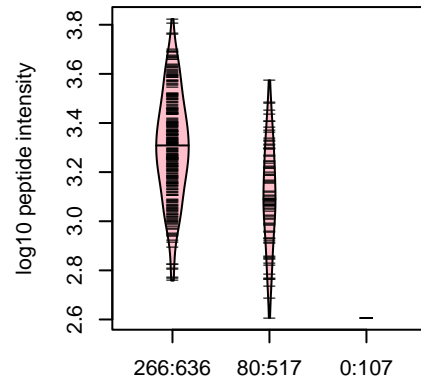

8:120429024:G:A\_A  
p = 1.1e-31, model = REC, N = 346

Assay Target: CCN3  
Olink UniProt: P48745  
UKB rsID: rs2279112  
Proxy rsID: rs2279112  
UKB SNP: 8:120429024:G:A  
Proxy SNP: 8:120429024:G:A  
UKB log10(p): 370.3  
UKB BETA: -0.264  
-----  
1195:1140:888:759:683:635:588

**MARCO : NP5  
Q9UEW3**

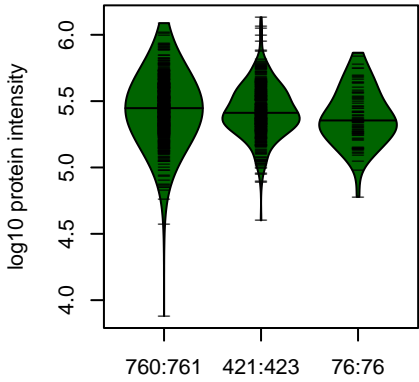

2:119728472:C:T\_T  
p = 8.7e-05, beta = -0.181, N = 1257

**GTESTLWSCTK pc2  
Q9UEW3**

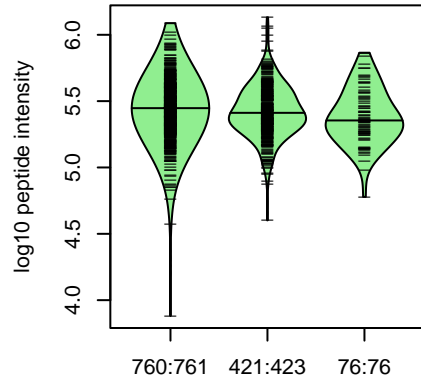

2:119728472:C:T\_T  
p = 1e-04, beta = -0.179, N = 1257

**LQVLQAQLTWVR pc2  
Q9UEW3**

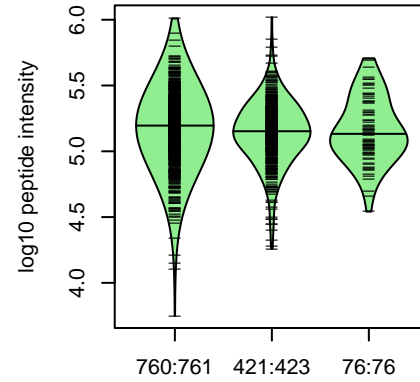

2:119728472:C:T\_T  
p = 0.015, beta = -0.112, N = 1257

**GENSVSVR pc2  
Q9UEW3**

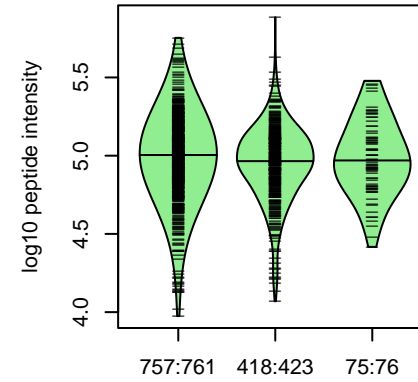

2:119728472:C:T\_T  
p = 0.0053, beta = -0.129, N = 1250

**VGAGTGQIWLNDNVQCR pc2  
Q9UEW3**

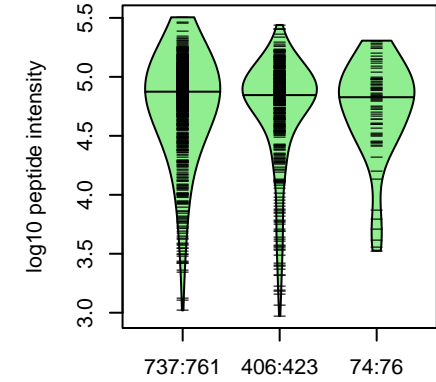

2:119728472:C:T\_T  
p = 0.0082, beta = -0.124, N = 1217

**MARCO : NP5  
Q9UEW3**

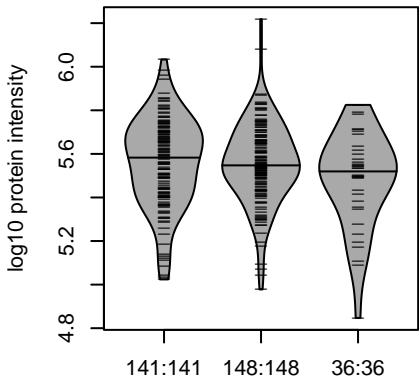

2:119728472:C:T\_T  
p = 0.039, beta = -0.17, N = 325

**GTESTLWSCTK pc2  
Q9UEW3**

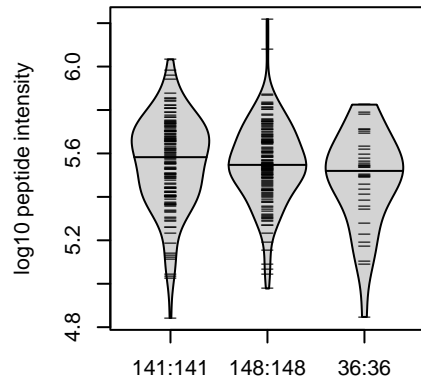

2:119728472:C:T\_T  
p = 0.042, beta = -0.168, N = 325

**LQVLQAQLTWVR pc2  
Q9UEW3**

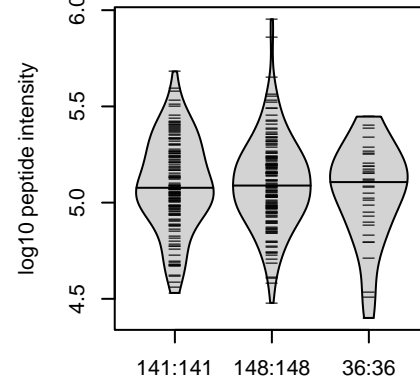

2:119728472:C:T\_T  
p = 0.2, beta = -0.105, N = 325

**VGAGTGQIWLNDNVQCR pc2  
Q9UEW3**

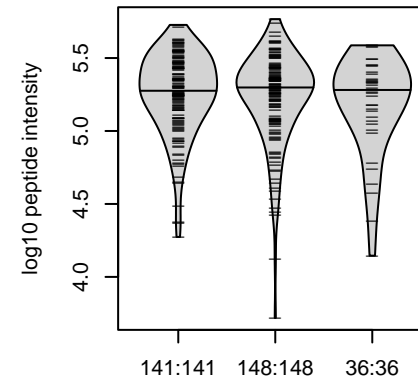

2:119728472:C:T\_T  
p = 0.084, beta = -0.142, N = 325

**VSHEHLLQR pc2  
Q9UEW3**

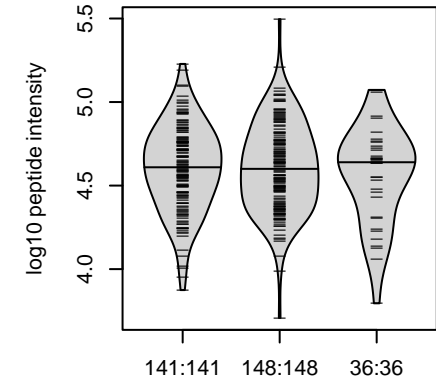

2:119728472:C:T\_T  
p = 0.29, beta = -0.088, N = 325

Assay Target: MARCO  
Olink UniProt: Q9UEW3  
UKB rsID: rs35288880  
Proxy rsID: rs35288880  
UKB SNP: 2:119728472:C:T  
Proxy SNP: 2:119728472:C:T  
UKB log10(p): 367.5  
UKB BETA: -0.324  
\*.-.\*.\*.-.-.-  
1257:1257:1250:1217:1211:110



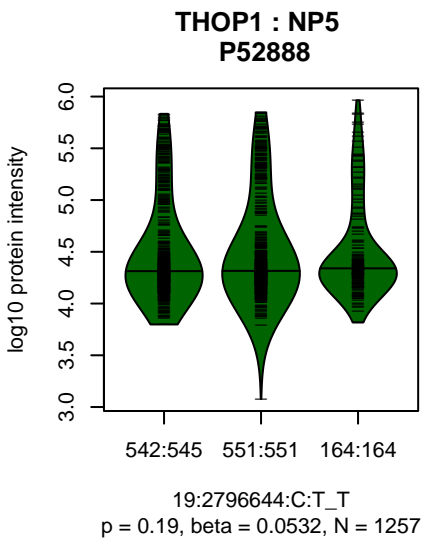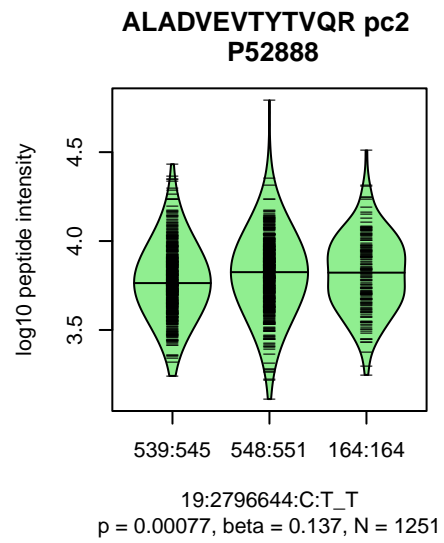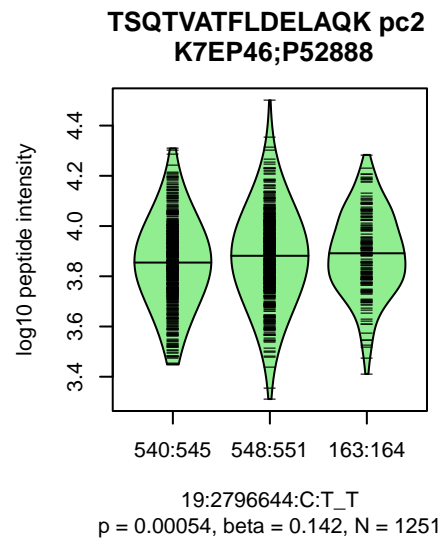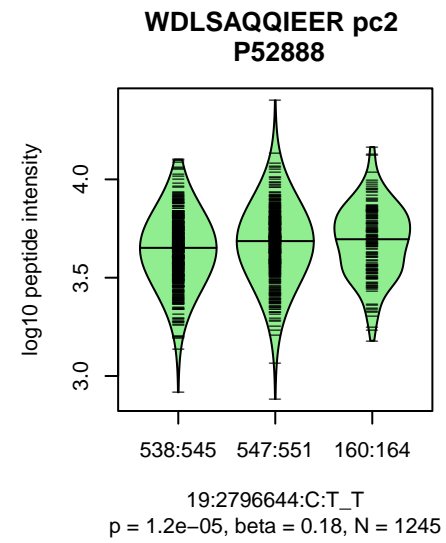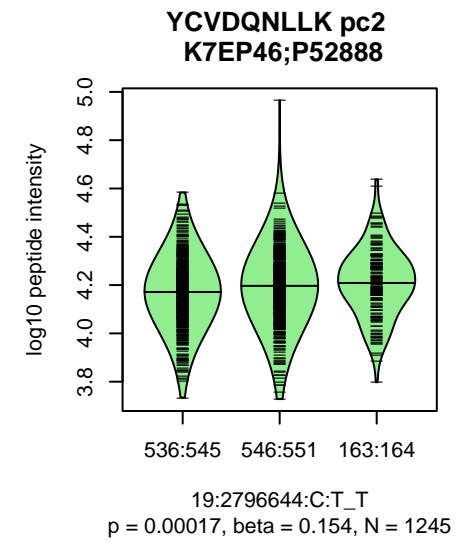

Assay Target: THOP1  
 Olink UniProt: P52888  
 UKB rsID: rs550767741  
 Proxy rsID: rs2741990  
 UKB SNP: 19:2786763:A:ATTT  
 Proxy SNP: 19:2796644:C:T  
 UKB log10(p): 366.5  
 UKB BETA: 0.266  
 .....  
 1251:1251:1245:1245:1236:123



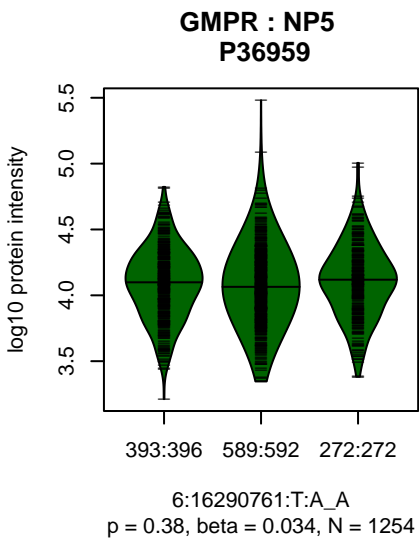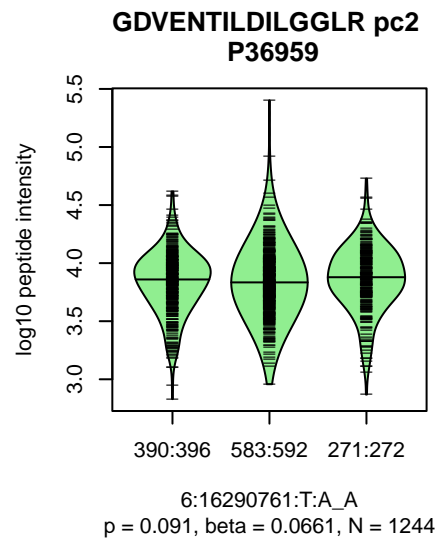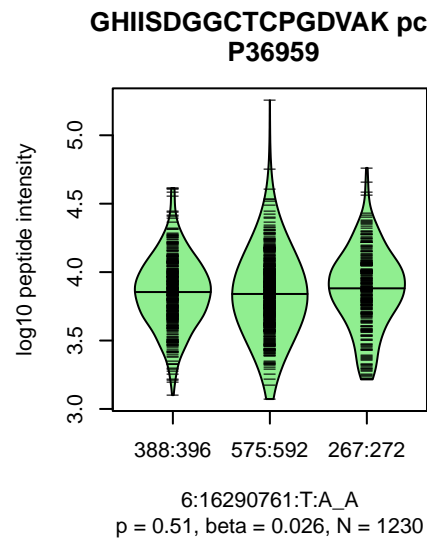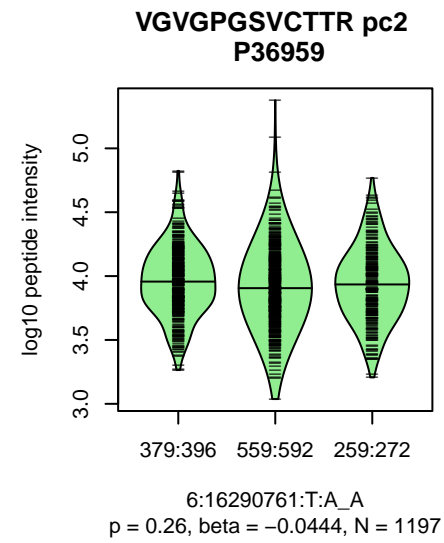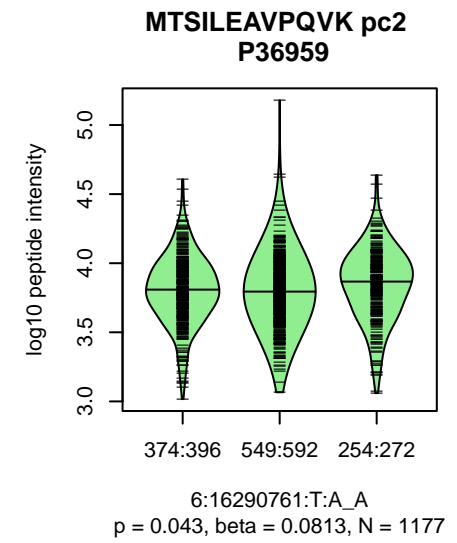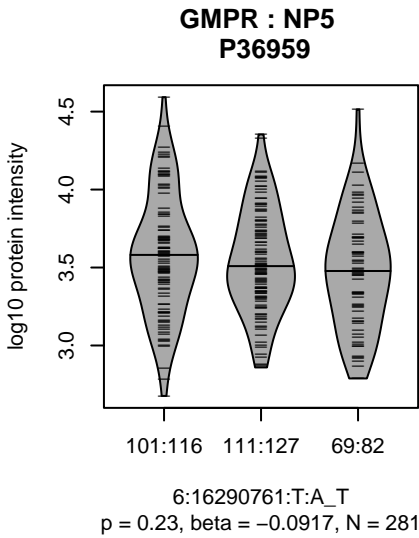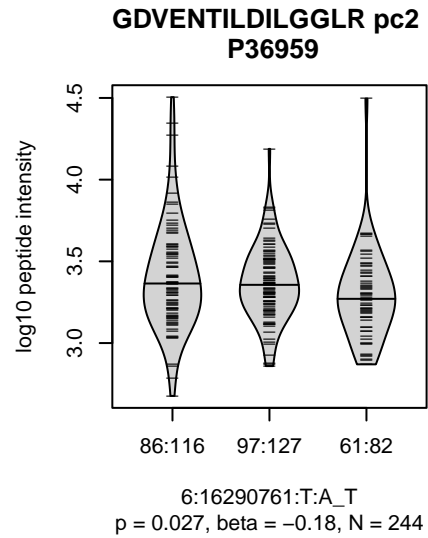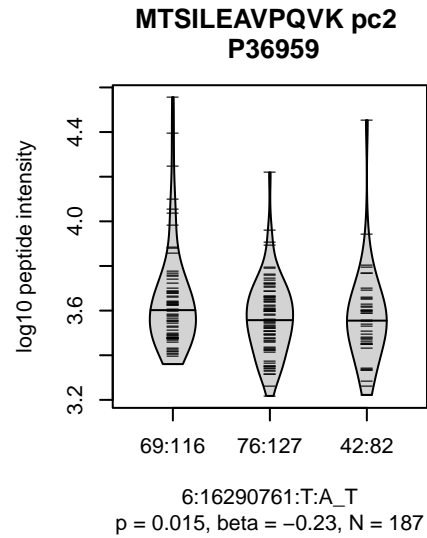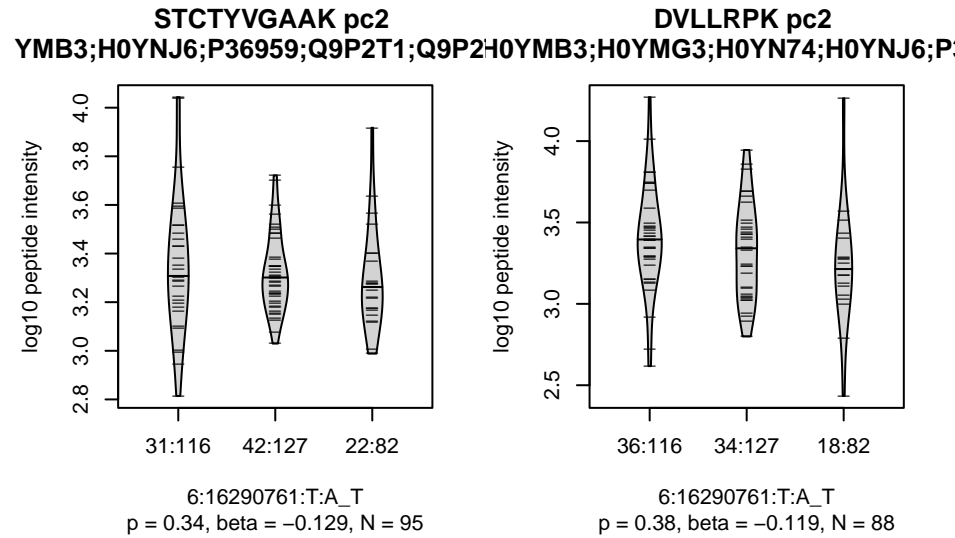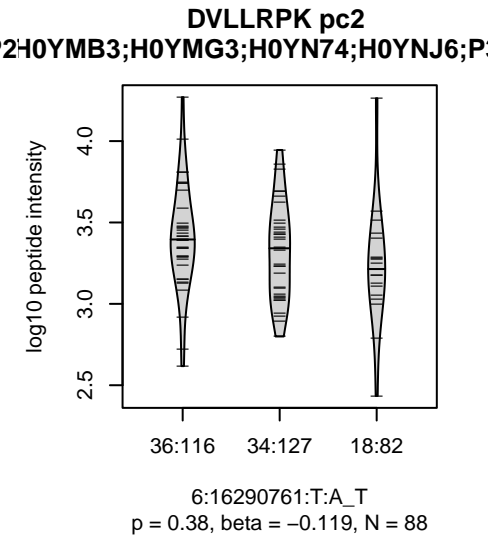

Assay Target: GMPR  
 Olink UniProt: P36959  
 UKB rsID: rs1042391  
 Proxy rsID: rs1042391  
 UKB SNP: 6:16290761:T:A  
 Proxy SNP: 6:16290761:T:A  
 UKB log10(p): 362.5  
 UKB BETA: 0.252  
 -----NA  
 1244:1230:1197:1177:1174:109





**GRN : NP4  
P28799**

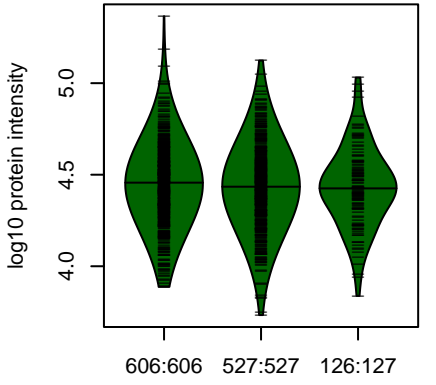

17:42430244:C:T\_T  
p = 0.27, beta = -0.0473, N = 1259

**HCCPAGFR pc2  
K7EQ05;P28799;P28799-2**

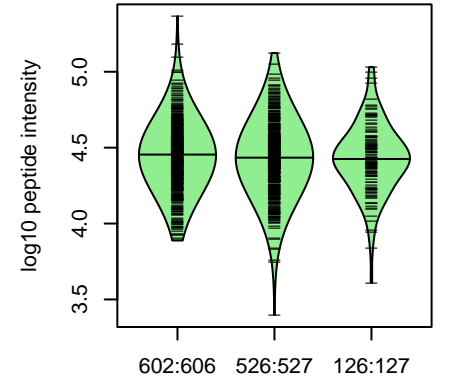

17:42430244:C:T\_T  
p = 0.21, beta = -0.0535, N = 1254

**QGWACCPYR pc2  
K7EQ05;P28799;P28799-2**

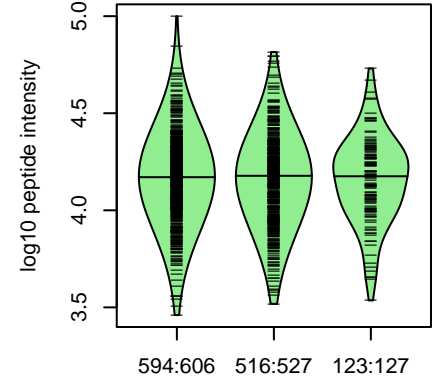

17:42430244:C:T\_T  
p = 0.48, beta = -0.0302, N = 1233

**QGVCCADR pc2  
K7EQ05;P28799;P28799-2**

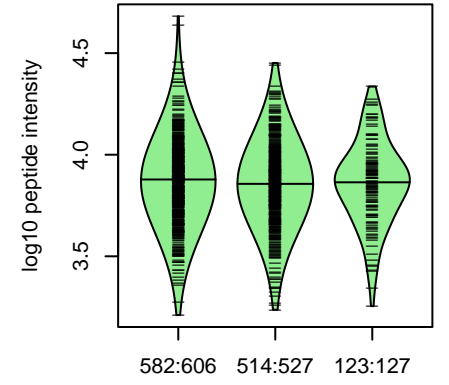

17:42430244:C:T\_T  
p = 0.37, beta = -0.0389, N = 1219

**VHCCPHGAFCDLVHTR pc4  
P28799;P28799-2**

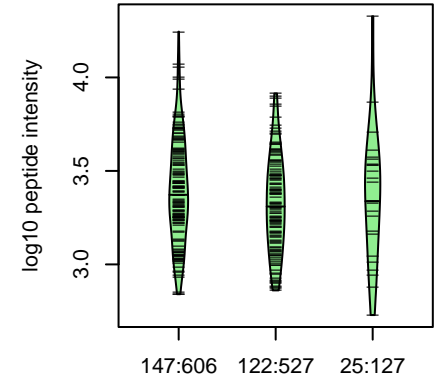

17:42430244:C:T\_T  
p = 0.14, beta = -0.131, N = 294

**GRN : NP4  
P28799;P28799-2**

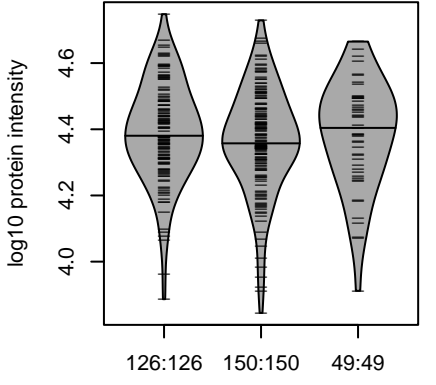

17:42430244:C:T\_T  
p = 0.26, beta = -0.0887, N = 325

**QGWACCPYR pc2  
K7EQ05;P28799;P28799-2**

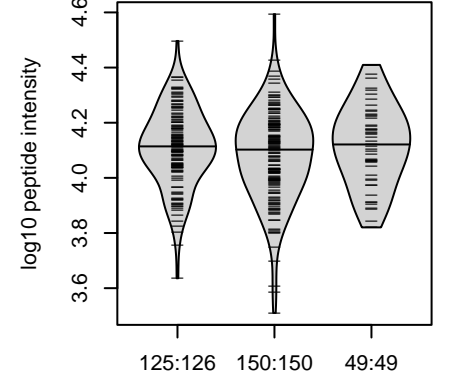

17:42430244:C:T\_T  
p = 0.42, beta = -0.0631, N = 324

**HCCPAGFR pc2  
K7EQ05;P28799;P28799-2**

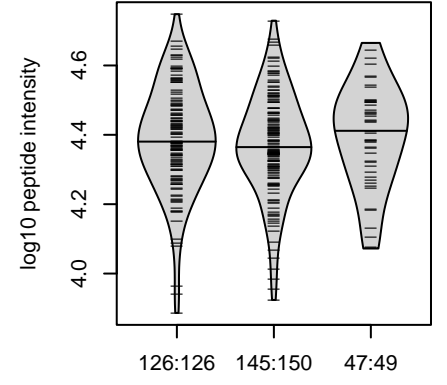

17:42430244:C:T\_T  
p = 0.59, beta = -0.0429, N = 318

**QGVCCADR pc2  
K7EQ05;P28799;P28799-2**

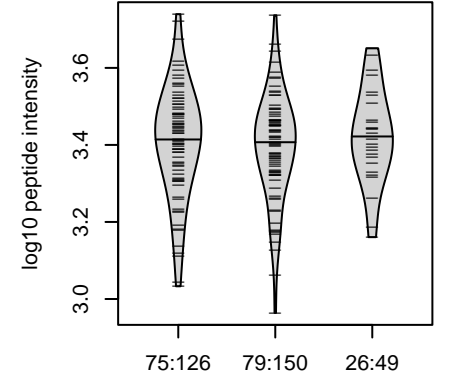

17:42430244:C:T\_T  
p = 0.94, beta = -0.0074, N = 180

Assay Target: GRN  
Olink UniProt: P28799  
UKB rsID: rs5848  
Proxy rsID: rs5848  
UKB SNP: 17:42430244:C:T  
Proxy SNP: 17:42430244:C:T  
UKB log10(p): 351.4  
UKB BETA: -0.25  
-:-:-:-:-NA  
1254:1233:1219:294:280:58:16



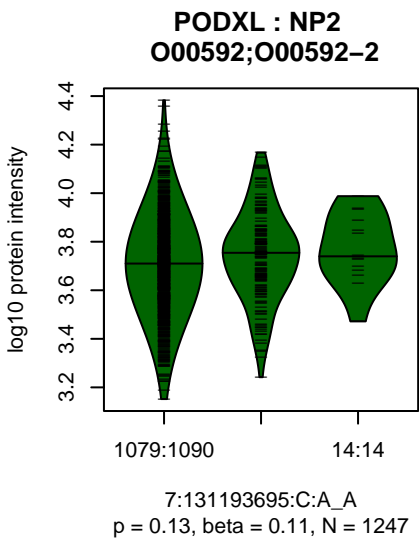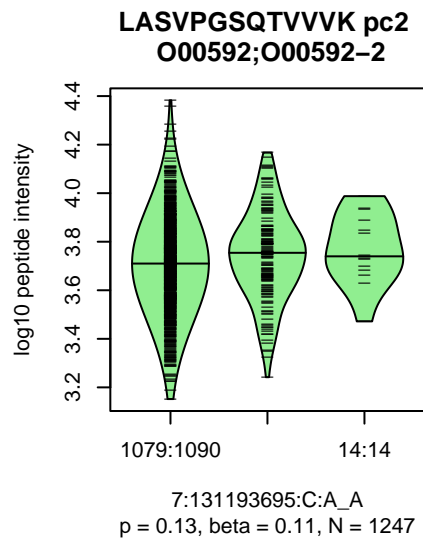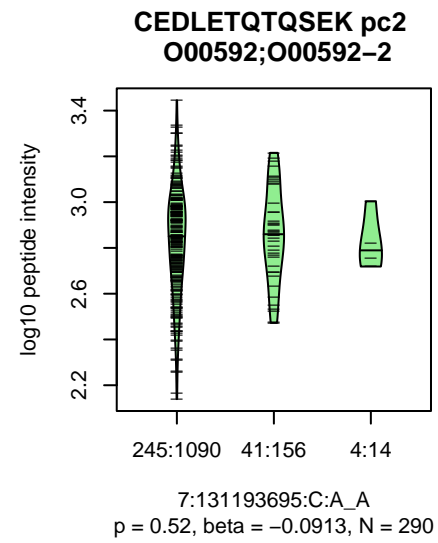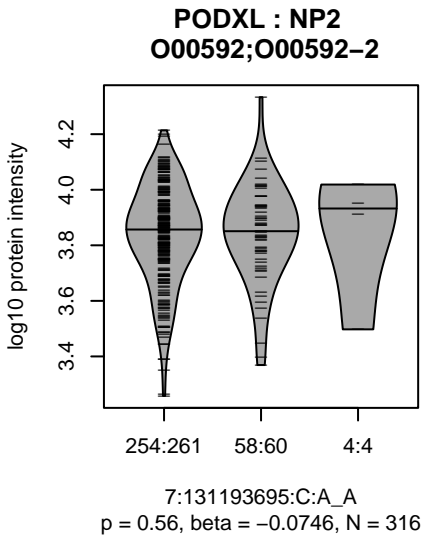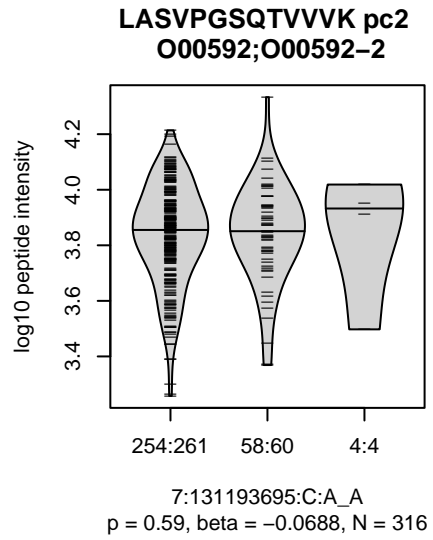

Assay Target: PODXL  
 Olink UniProt: O00592  
 UKB rsID: rs3212298  
 Proxy rsID: rs3212299  
 UKB SNP: 7:131193739:C:T  
 Proxy SNP: 7:131193695:C:A  
 UKB log<sub>10</sub>(p): 325.3  
 UKB BETA: -0.555  
 -: -  
 1247:290

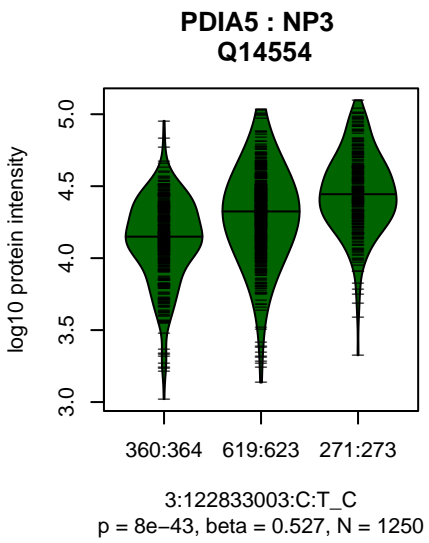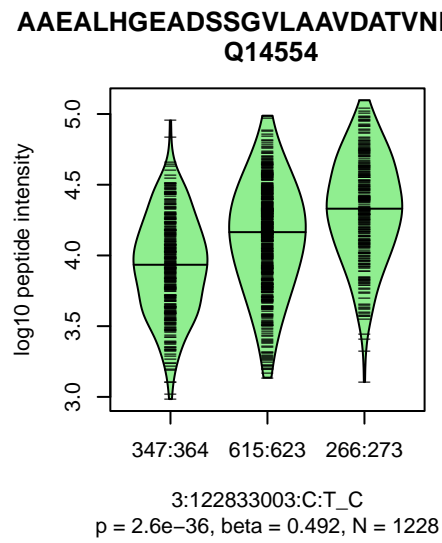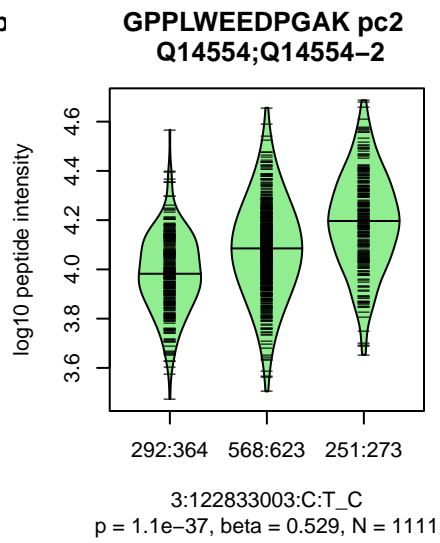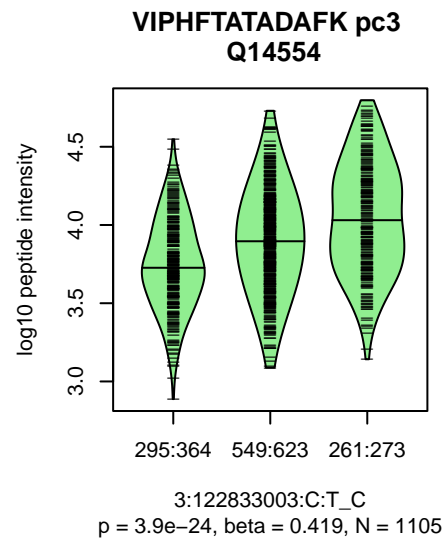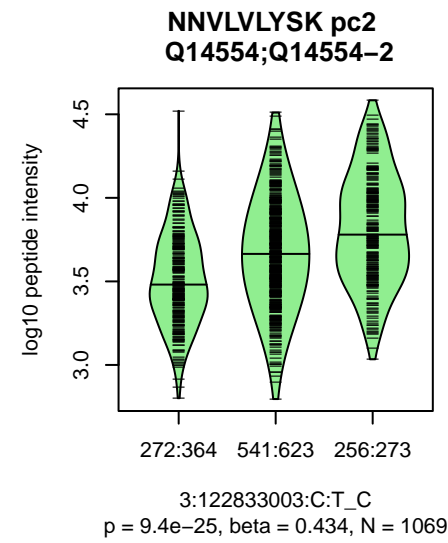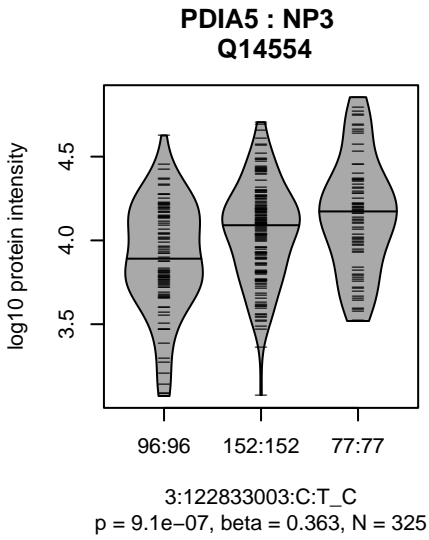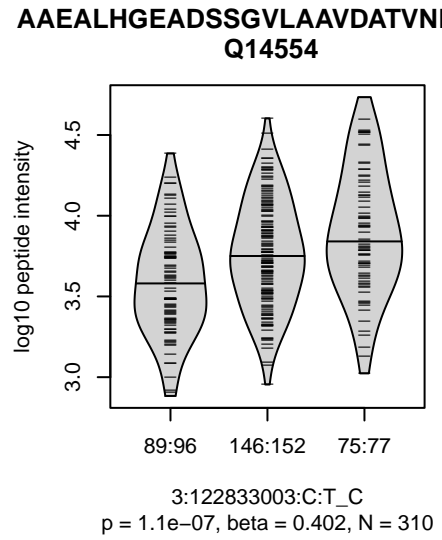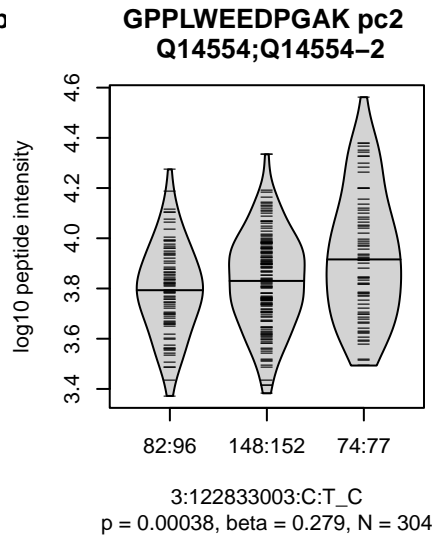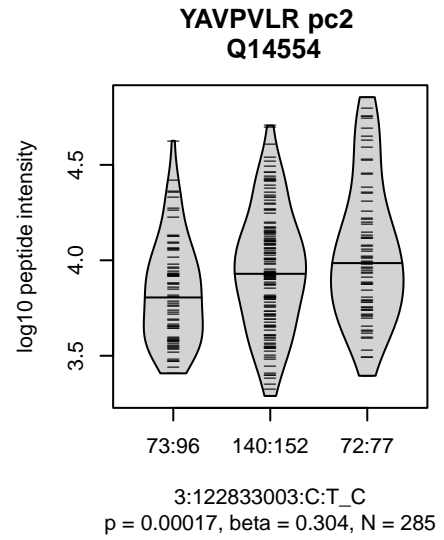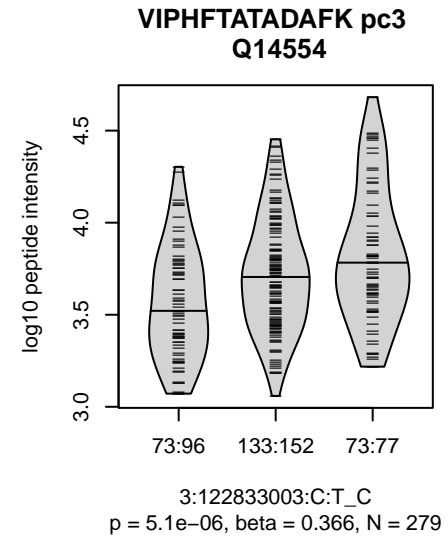

Assay Target: PDIA5  
 Olink UniProt: Q14554  
 UKB rsID: rs3804749  
 Proxy rsID: rs3804749  
 UKB SNP: 3:122833003:C:T  
 Proxy SNP: 3:122833003:C:T  
 UKB log10(p): 321.3  
 UKB BETA: -0.247  
 .....  
 1228:1111:1105:1069:1051:100

**ST3GAL1 : NP4**  
**Q11201**

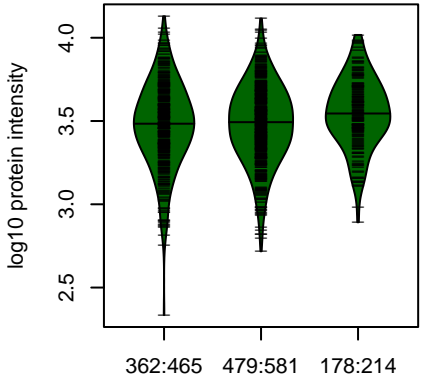

8:134503148:C:T\_C  
p = 0.0041, beta = 0.127, N = 1019

**CAVVGNSGNLR pc2**  
**Q11201;Q16842**

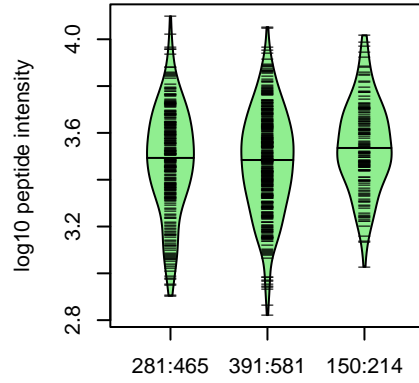

8:134503148:C:T\_C  
p = 0.016, beta = 0.118, N = 822

**QMVLESENK pc2**  
**Q11201**

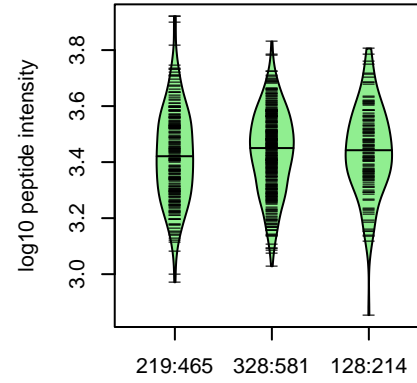

8:134503148:C:T\_C  
p = 0.26, beta = 0.0609, N = 675

**APTAGFEADVGTK pc2**  
**Q11201**

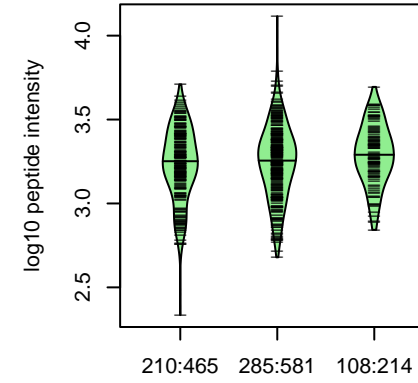

8:134503148:C:T\_C  
p = 0.025, beta = 0.128, N = 603

**TTHHLVPESFR pc3**  
**Q11201**

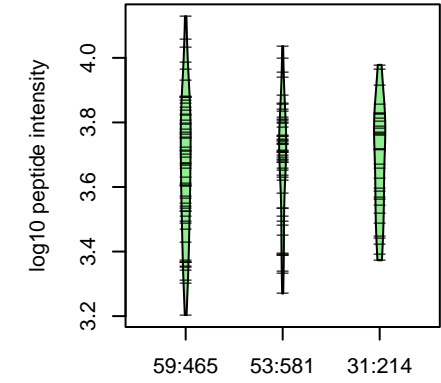

8:134503148:C:T\_C  
p = 0.81, beta = 0.0256, N = 143

**ST3GAL1 : NP4**  
**Q11201**

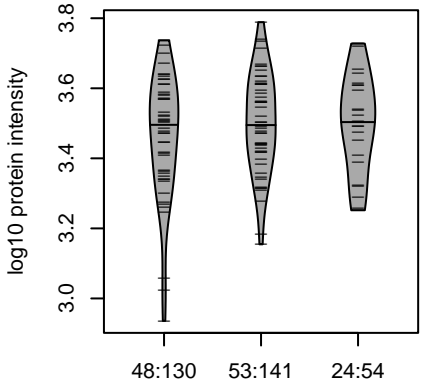

8:134503148:C:T\_C  
p = 0.76, beta = 0.0364, N = 125

**CAVVGNSGNLR pc2**  
**Q11201;Q16842**

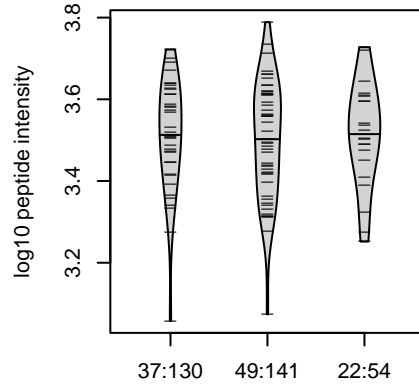

8:134503148:C:T\_C  
p = 0.37, beta = -0.116, N = 108

**APTAGFEADVGTK pc2**  
**Q11201**

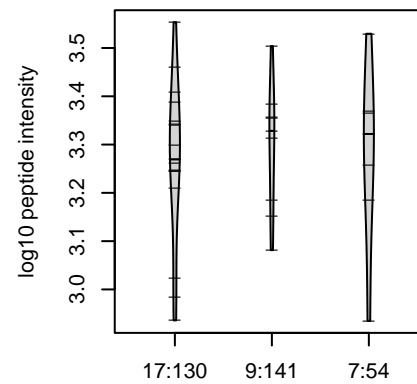

8:134503148:C:T\_C  
p = 0.87, beta = -0.0325, N = 33

Assay Target: ST3GAL1  
Olink UniProt: Q11201  
UKB rsID: rs9643300  
Proxy rsID: rs9643300  
UKB SNP: 8:134503148:C:T  
Proxy SNP: 8:134503148:C:T  
UKB log10(p): 312.8  
UKB BETA: -0.227  
-:-:-:-  
822:675:603:143

**CD59 : NP1  
P13987**

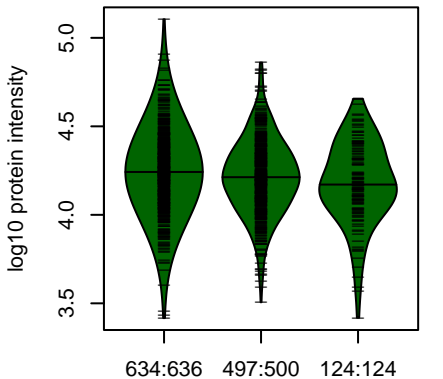

11:33739598:G:A\_A  
p = 0.00045, beta = -0.149, N = 1255

**FEHCNFNDVTR pc3  
E9PNW4;P13987-2;P13987**

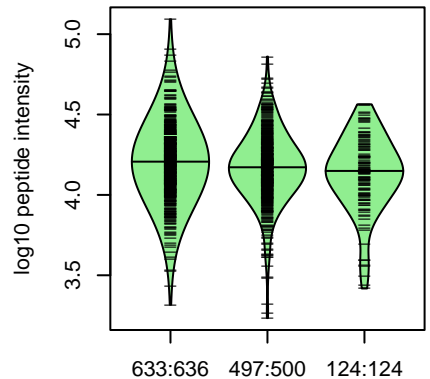

11:33739598:G:A\_A  
p = 0.00014, beta = -0.161, N = 1254

**AGLQVYNK pc2  
E9PNW4;P13987-2;P13987**

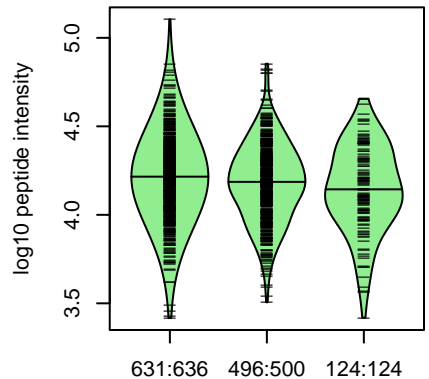

11:33739598:G:A\_A  
p = 6e-04, beta = -0.145, N = 1251

**LRENELTYYCCK pc3  
E9PNW4;P13987-2;P13987**

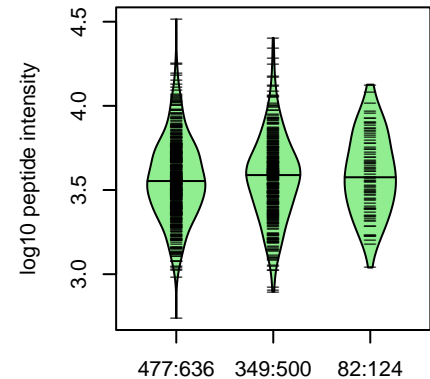

11:33739598:G:A\_A  
p = 0.54, beta = 0.0313, N = 908

**ENELTYYCCK pc2  
E9PNW4;P13987-2;P13987**

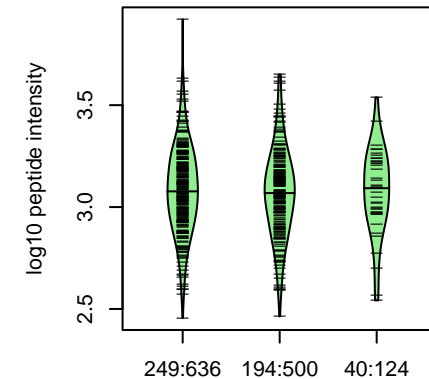

11:33739598:G:A\_A  
p = 0.39, beta = -0.0604, N = 483

**CD59 : NP1  
P13987**

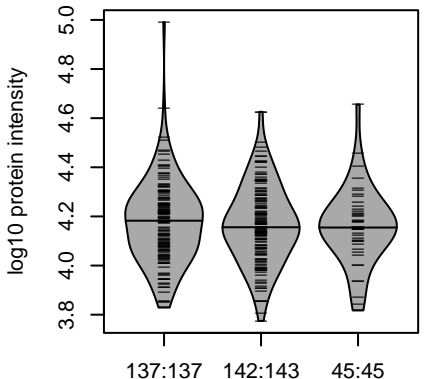

11:33739598:G:A\_A  
p = 0.28, beta = -0.086, N = 324

**FEHCNFNDVTR pc3  
E9PNW4;P13987-2;P13987**

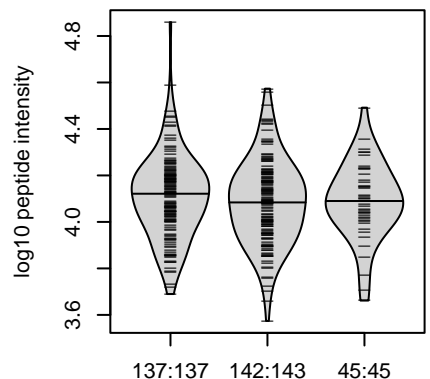

11:33739598:G:A\_A  
p = 0.19, beta = -0.103, N = 324

**AGLQVYNK pc2  
E9PNW4;P13987-2;P13987**

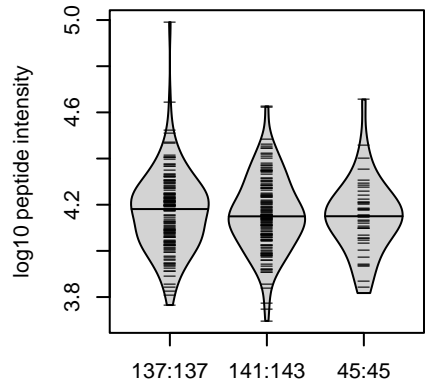

11:33739598:G:A\_A  
p = 0.29, beta = -0.0834, N = 323

**LRENELTYYCCK pc3  
E9PNW4;P13987-2;P13987**

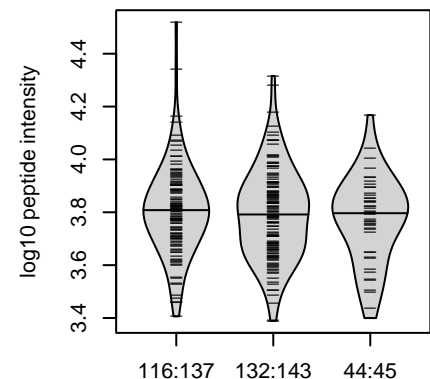

11:33739598:G:A\_A  
p = 0.14, beta = -0.123, N = 292

**ENELTYYCCK pc2  
E9PNW4;P13987-2;P13987**

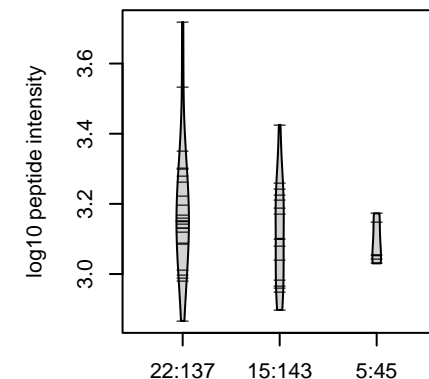

11:33739598:G:A\_A  
p = 0.57, beta = -0.121, N = 42

Assay Target: CD59  
Olink UniProt: P13987  
UKB rsID: rs831636  
Proxy rsID: rs831636  
UKB SNP: 11:33739598:G:A  
Proxy SNP: 11:33739598:G:A  
UKB log10(p): 305.8  
UKB BETA: -0.229  
\*.\*-:-:-:-  
1254:1251:908:589:483:60

**SDC4 : NP2**  
**P31431**

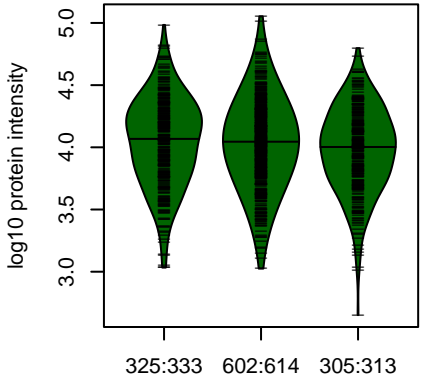

20:43974319:C:T\_T  
p = 0.00063, beta = -0.135, N = 1232

**AGSGSQVPTPK pc2**  
**P31431**

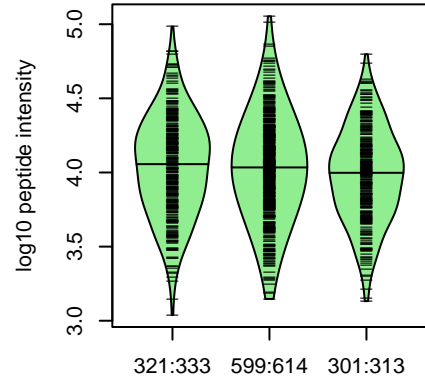

20:43974319:C:T\_T  
p = 0.0012, beta = -0.129, N = 1221

**KLEENEVIPK pc2**  
**P31431**

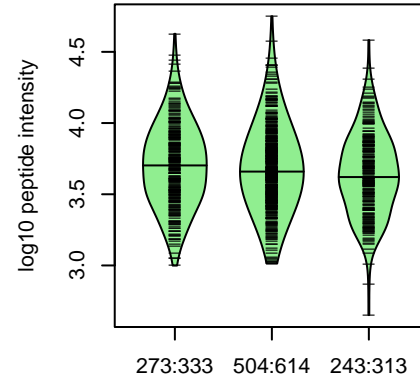

20:43974319:C:T\_T  
p = 0.0018, beta = -0.136, N = 1020

**ETEVIDPQDLLEGR pc2**  
**P31431**

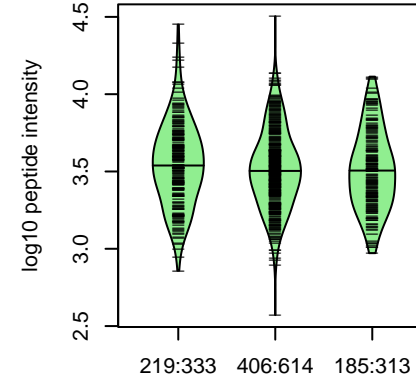

20:43974319:C:T\_T  
p = 0.026, beta = -0.111, N = 810

**ISPVEESEDVSNK pc2**  
**P31431**

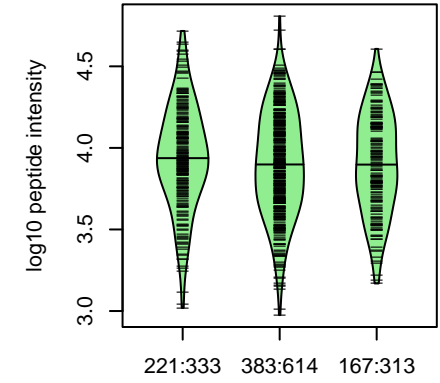

20:43974319:C:T\_T  
p = 0.073, beta = -0.091, N = 771

**SDC4 : NP2**  
**P31431**

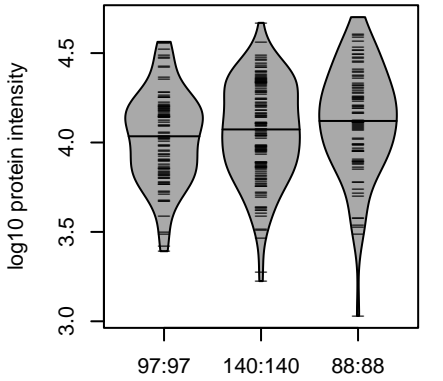

20:43974319:C:T\_C  
p = 0.0093, beta = 0.188, N = 325

**KLEENEVIPK pc2**  
**P31431**

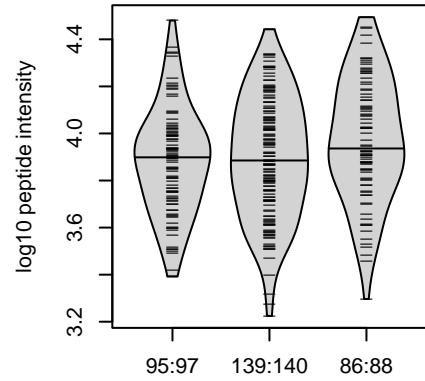

20:43974319:C:T\_C  
p = 0.027, beta = 0.162, N = 320

**AGSGSQVPTPK pc2**  
**P31431**

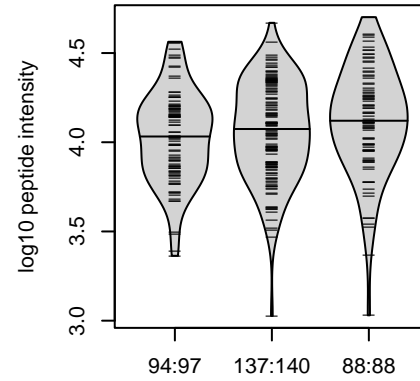

20:43974319:C:T\_C  
p = 0.016, beta = 0.175, N = 319

**ISPVEESEDVSNK pc2**  
**P31431**

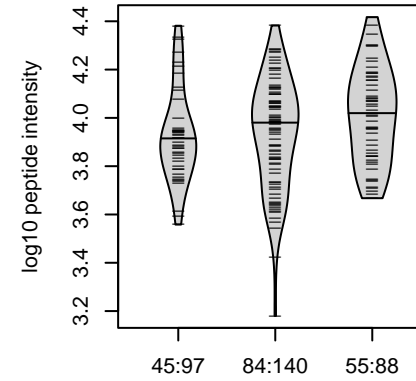

20:43974319:C:T\_C  
p = 0.1, beta = 0.16, N = 184

Assay Target: SDC4  
 Olink UniProt: P31431  
 UKB rsID: rs2741454  
 Proxy rsID: rs2741454  
 UKB SNP: 20:43974319:C:T  
 Proxy SNP: 20:43974319:C:T  
 UKB log10(p): 302.4  
 UKB BETA: -0.226  
 \*.-.-.-.-  
 1221:1020:810:771:544:99



**C1QTNF1 : NP5**  
A0A0C4DFP7;Q9BXJ1

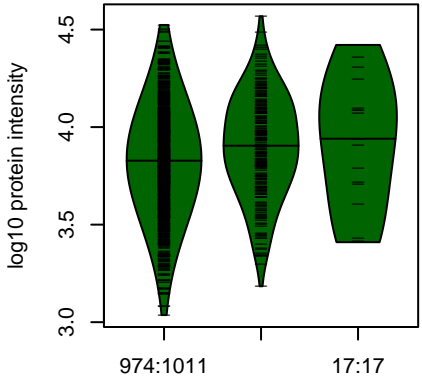

17:77018400:C:T\_T  
p = 5.5e-06, beta = 0.293, N = 1215

**SIMQSQSLMLELR pc2**  
A0A0C4DFP7;Q9BXJ1

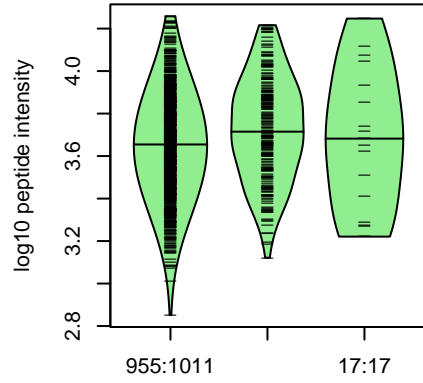

17:77018400:C:T\_T  
p = 1.2e-05, beta = 0.286, N = 1188

**EQDQVWVR pc2**  
A0A0C4DFP7;Q9BXJ1

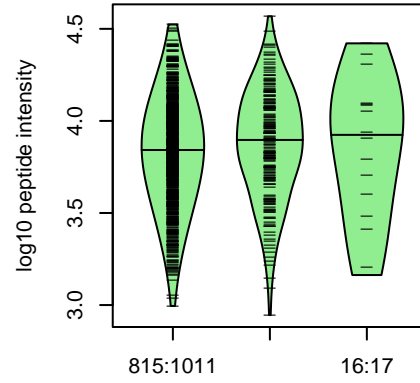

17:77018400:C:T\_T  
p = 0.025, beta = 0.154, N = 1028

**ETYLHIMK pc2**  
A0A0C4DFP7;Q9BXJ1

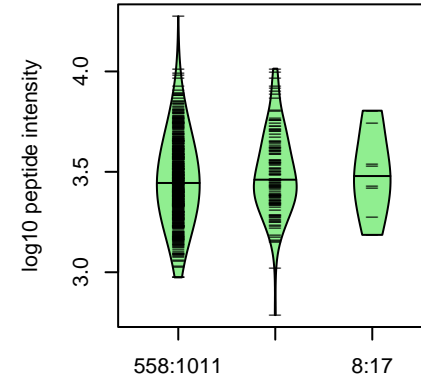

17:77018400:C:T\_T  
p = 0.044, beta = 0.175, N = 694

**SHYAAFSVGR pc2**  
A0A0C4DFP7;Q9BXJ1

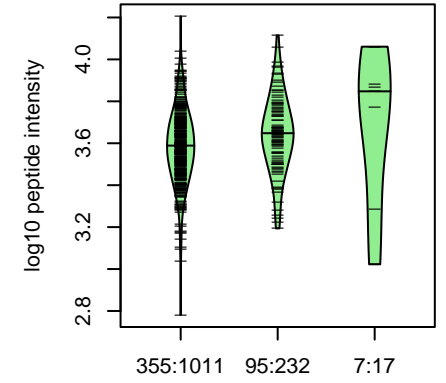

17:77018400:C:T\_T  
p = 0.0039, beta = 0.289, N = 457

**C1QTNF1 : NP5**  
A0A0C4DFP7;Q9BXJ1

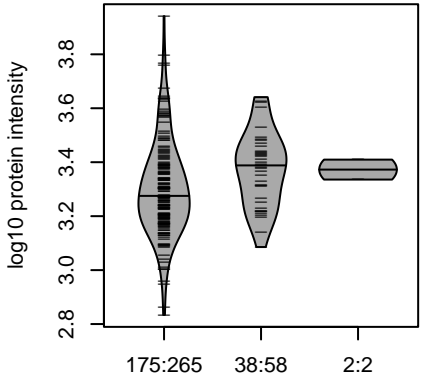

17:77018400:C:T\_T  
p = 0.012, beta = 0.399, N = 215

**SIMQSQSLMLELR pc2**  
A0A0C4DFP7;Q9BXJ1

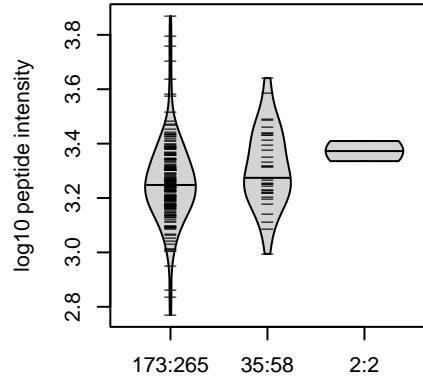

17:77018400:C:T\_T  
p = 0.03, beta = 0.356, N = 210

**SHYAAFSVGR pc2**  
A0A0C4DFP7;Q9BXJ1

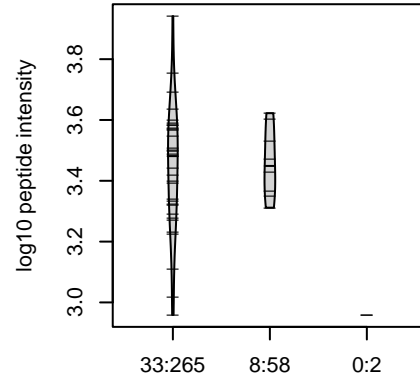

17:77018400:C:T\_T  
p = 0.94, beta = 0.03, N = 41

**ETYLHIMK pc2**  
A0A0C4DFP7;Q9BXJ1

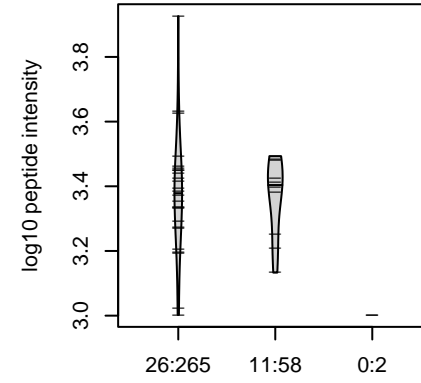

17:77018400:C:T\_T  
p = 0.92, beta = 0.0363, N = 37

Assay Target: C1QTNF1  
Olink UniProt: Q9BXJ1  
UKB rsID: rs116539064  
Proxy rsID: rs116539064  
UKB SNP: 17:77018400:C:T  
Proxy SNP: 17:77018400:C:T  
UKB log10(p): 297.8  
UKB BETA: 0.387  
\*:-:~\*:-:~NA  
1188:1028:694:457:250:4

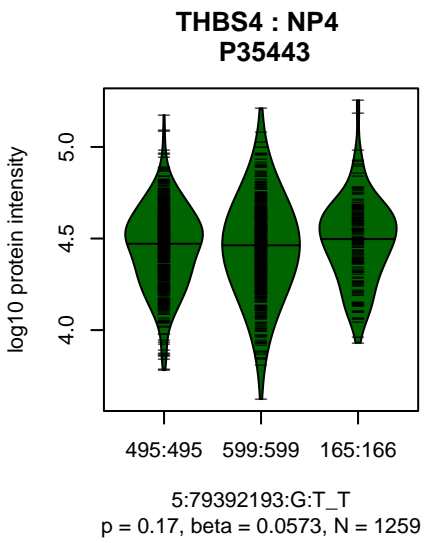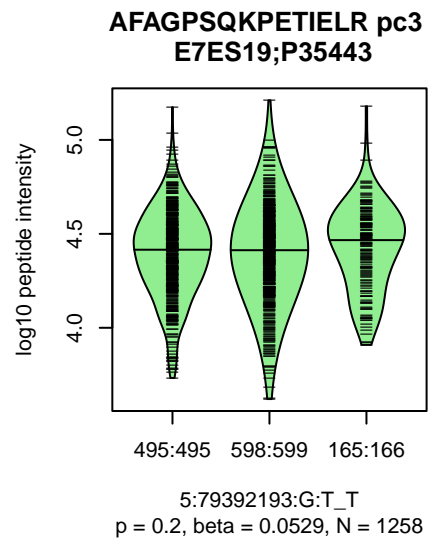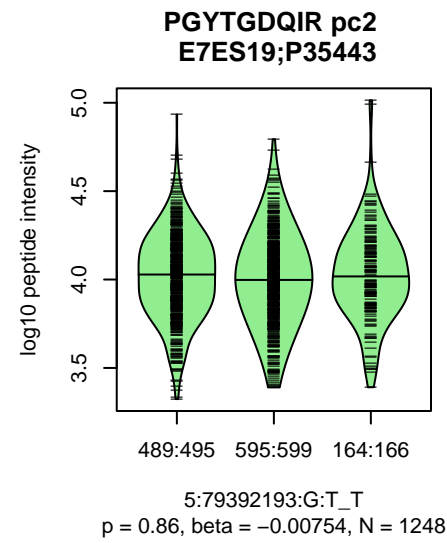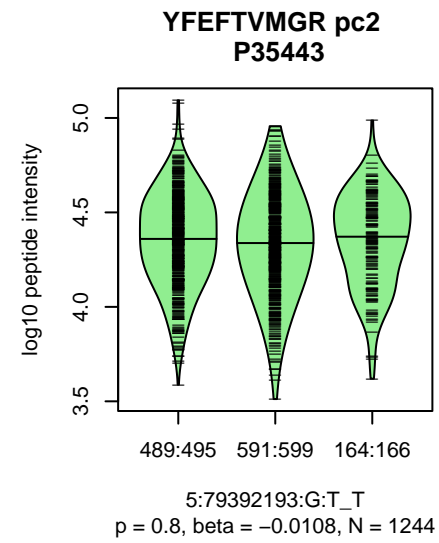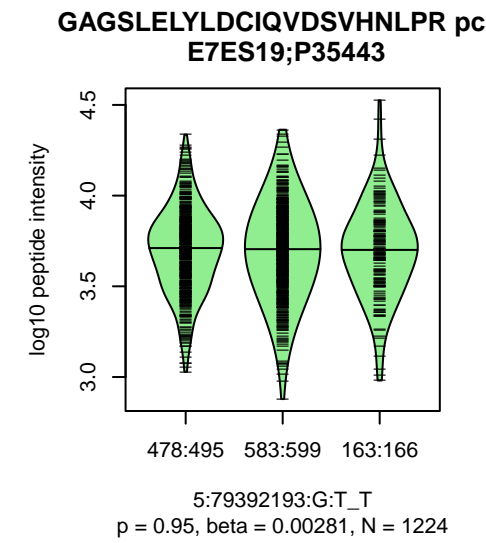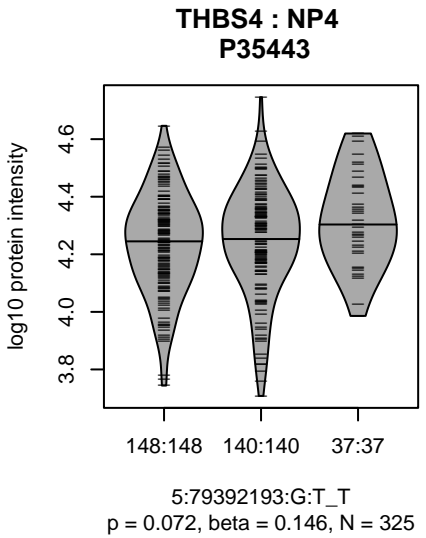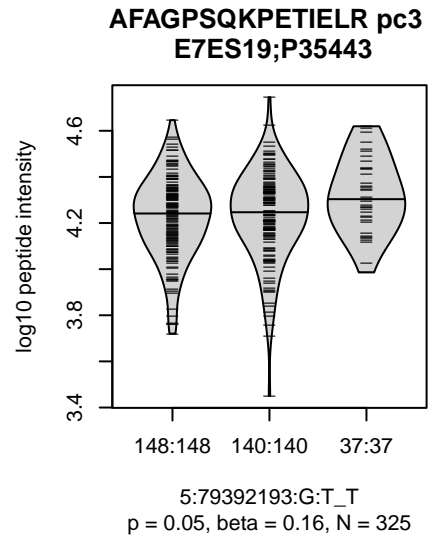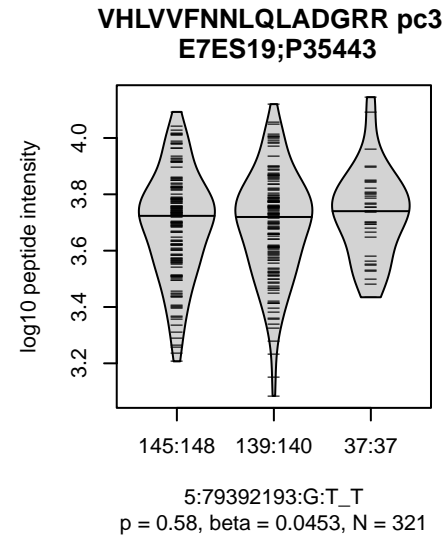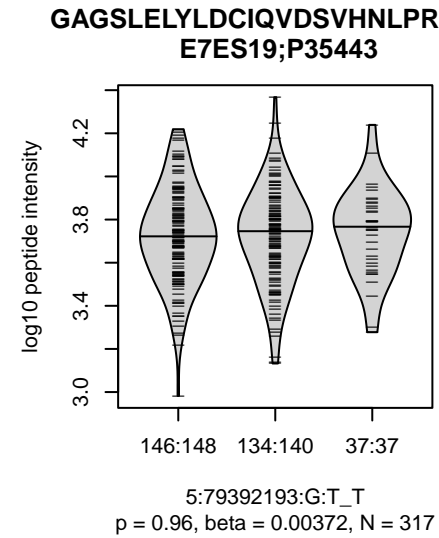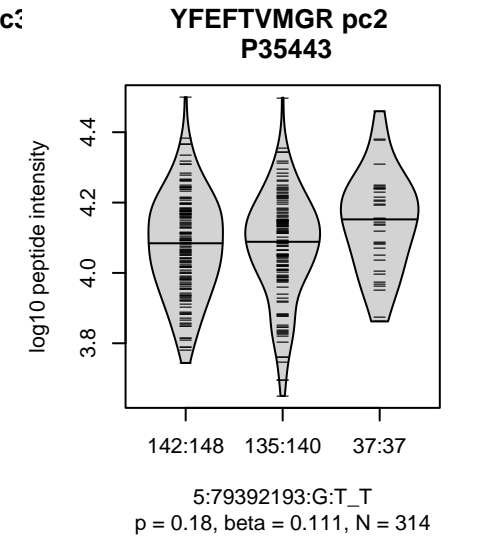

Assay Target: THBS4  
 Olink UniProt: P35443  
 UKB rsID: rs2438632  
 Proxy rsID: rs2438632  
 UKB SNP: 5:79392193:G:T  
 Proxy SNP: 5:79392193:G:T  
 UKB log10(p): 289.3  
 UKB BETA: 0.225  
 -----\*-----  
 1258:1248:1244:1224:1215:120





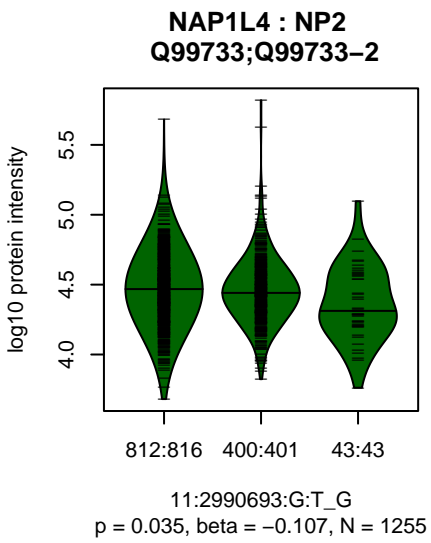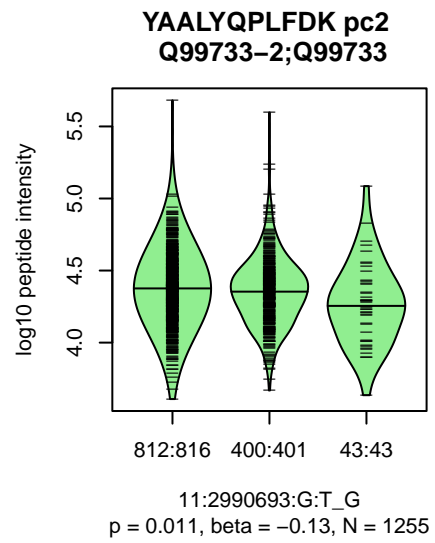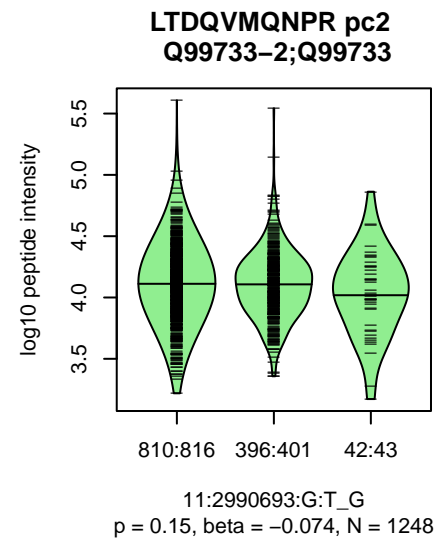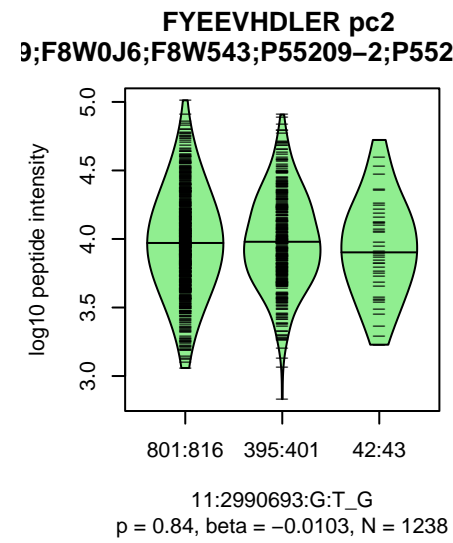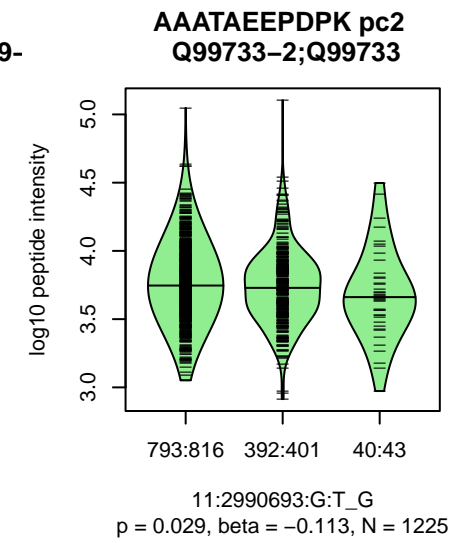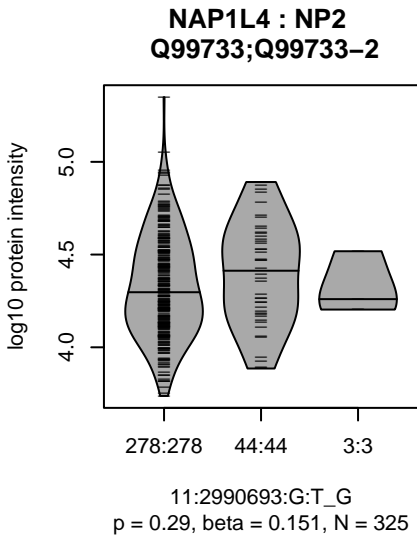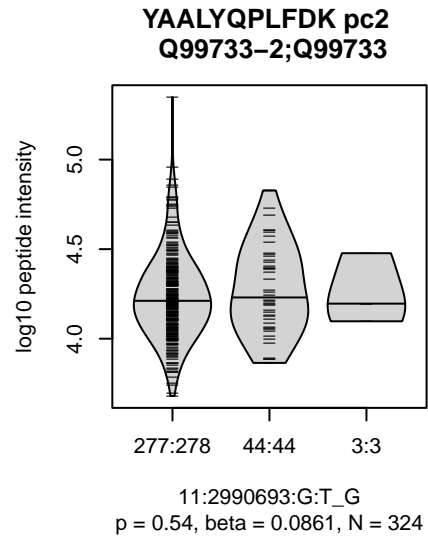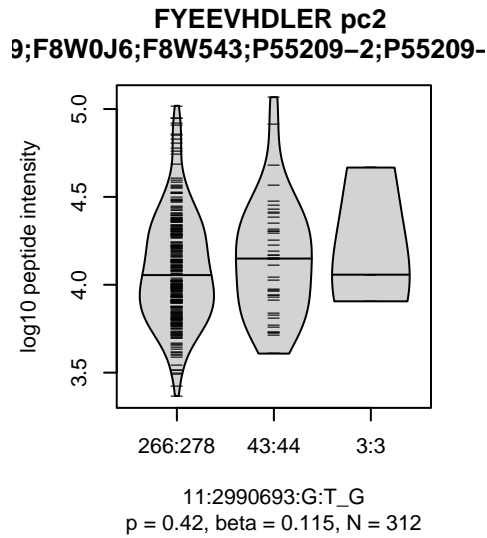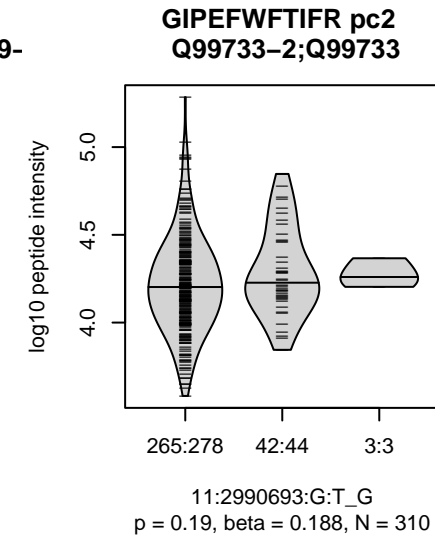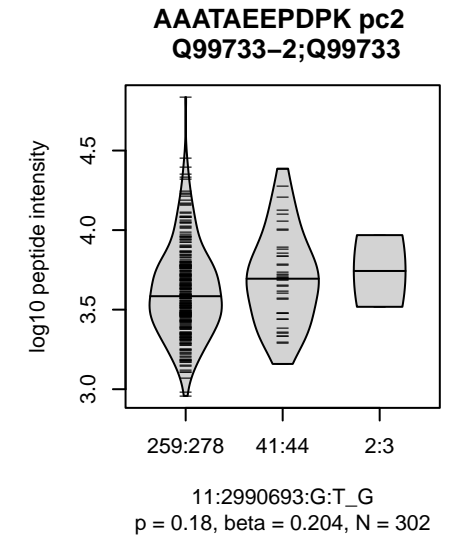

Assay Target: NAP1L4  
 Olink UniProt: Q99733  
 UKB rsID: rs57530484  
 Proxy rsID: rs4758501  
 UKB SNP: 11:2987643:T:TAAC  
 Proxy SNP: 11:2990693:G:T  
 UKB log10(p): 266.3  
 UKB BETA: 0.251  
 -----NA  
 1255:1248:1238:1225:1225:118

**TNFRSF11B : NP4**  
**O00300**

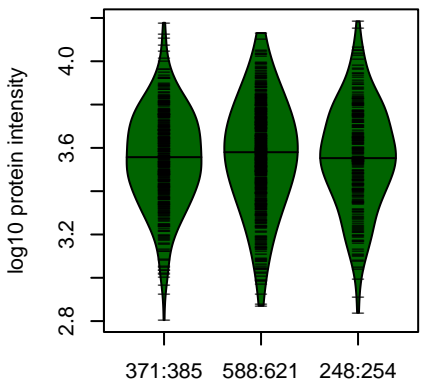

8:120113295:C:T\_T  
p = 0.39, beta = 0.0346, N = 1207

**LFLEMIGNQVQSVK pc2**  
**O00300**

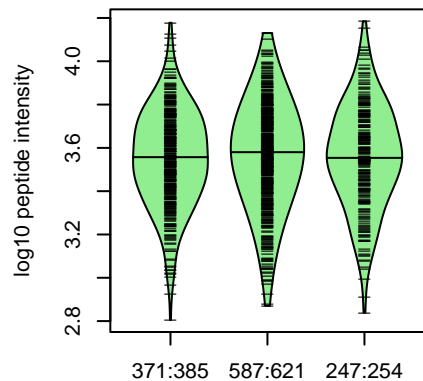

8:120113295:C:T\_T  
p = 0.35, beta = 0.0379, N = 1205

**FTPNWLSVLVDNLPGTK pc2**  
**O00300**

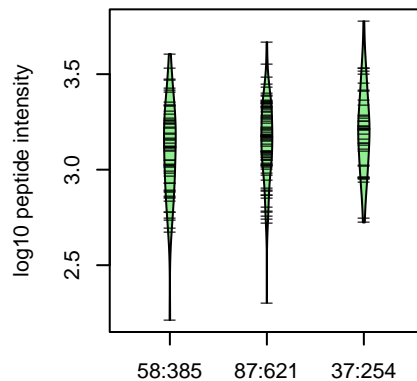

8:120113295:C:T\_T  
p = 0.02, beta = 0.235, N = 182

**TNFRSF11B : NP4**  
**O00300**

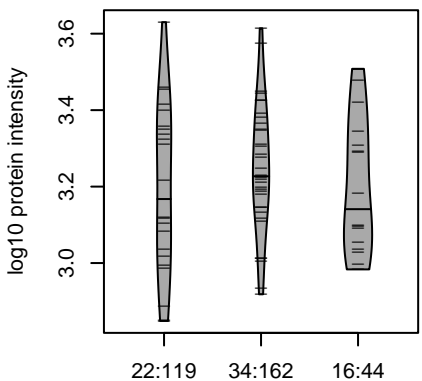

8:120113295:C:T\_T  
p = 0.95, beta = -0.00909, N = 72

**LFLEMIGNQVQSVK pc2**  
**O00300**

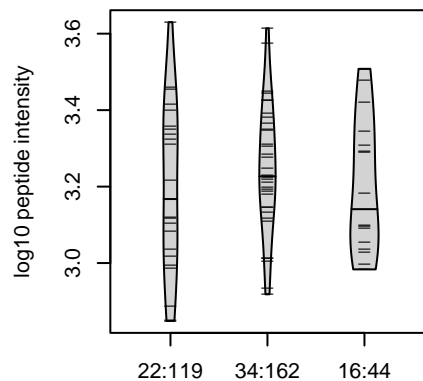

8:120113295:C:T\_T  
p = 0.95, beta = -0.00909, N = 72

Assay Target: TNFRSF11B  
Olink UniProt: O00300  
UKB rsID: rs748443516  
Proxy rsID: rs2465390  
UKB SNP: 8:120101198:CT:C  
Proxy SNP: 8:120113295:C:T  
UKB log10(p): 264.7  
UKB BETA: 0.193  
-:-:-  
1205:182:126

**APBB1IP : NP1  
Q7Z5R6**

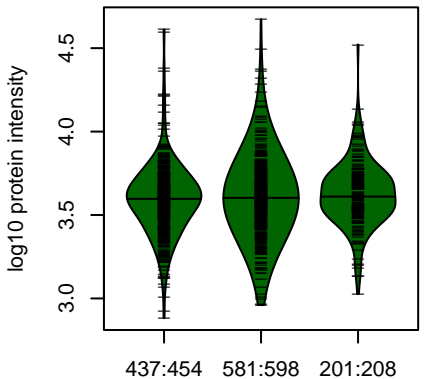

10:26727636:G:C\_G  
p = 0.072, beta = 0.0737, N = 1219

**TLNQWVMGIR pc2  
Q7Z5R6**

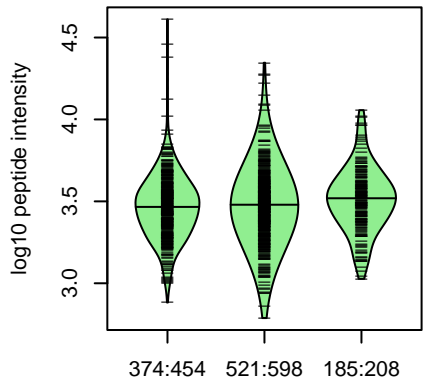

10:26727636:G:C\_G  
p = 0.03, beta = 0.0942, N = 1080

**TLYDNYQR pc2  
Q7Z5R6**

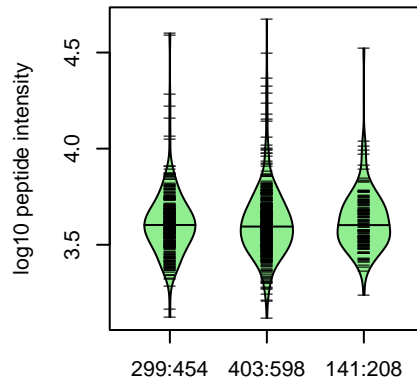

10:26727636:G:C\_G  
p = 0.48, beta = 0.035, N = 843

**APTDYCFVLK pc2  
Q7Z5R6**

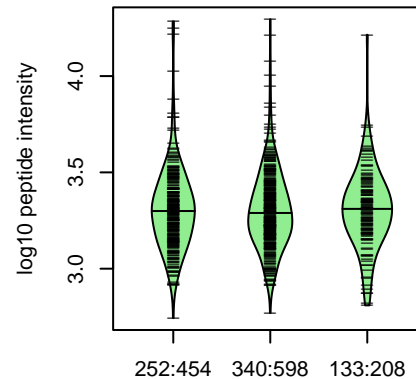

10:26727636:G:C\_G  
p = 0.74, beta = -0.0172, N = 725

**DVLNLFK pc2  
Q7Z5R6**

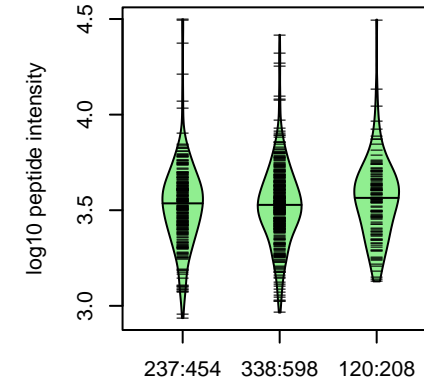

10:26727636:G:C\_G  
p = 0.2, beta = 0.0695, N = 695

**APBB1IP : NP1  
Q7Z5R6**

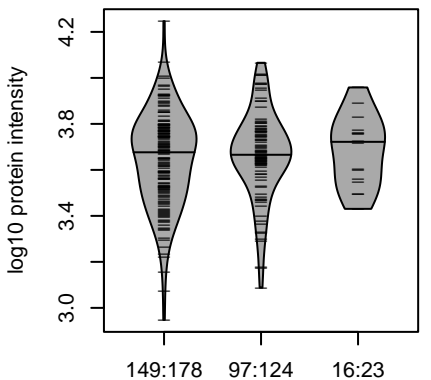

10:26727636:G:C\_G  
p = 0.57, beta = 0.0573, N = 262

**TLNQWVMGIR pc2  
Q7Z5R6**

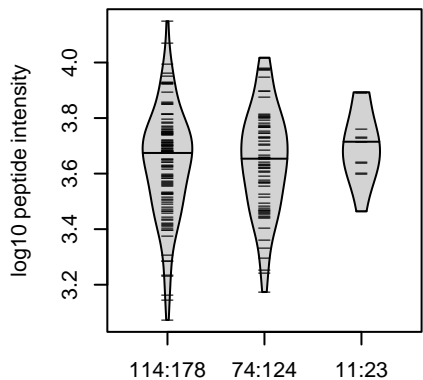

10:26727636:G:C\_G  
p = 0.56, beta = 0.0668, N = 199

**ASGIYYVPK pc2  
0E73-2;Q70E73-5;Q70E73-6;Q70E73**

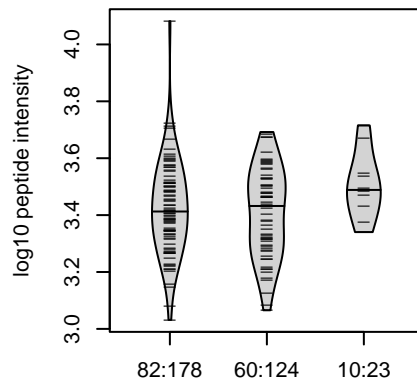

10:26727636:G:C\_G  
p = 0.68, beta = 0.0533, N = 152

**APTDYCFVLK pc2  
Q7Z5R6**

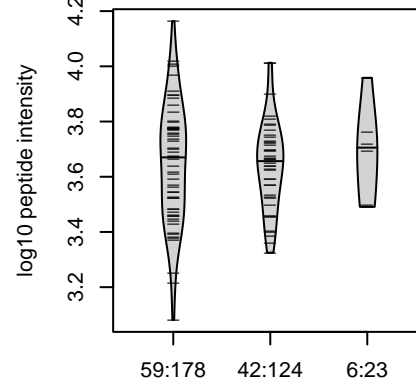

10:26727636:G:C\_G  
p = 0.74, beta = -0.0527, N = 107

**DVLNLFK pc2  
Q7Z5R6**

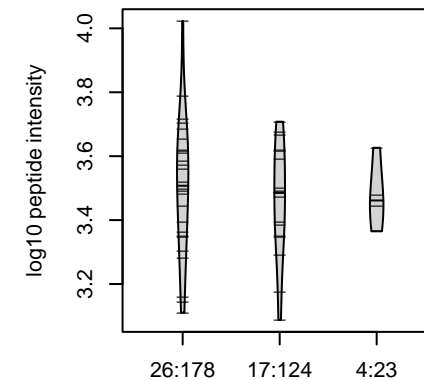

10:26727636:G:C\_G  
p = 0.33, beta = -0.208, N = 47

Assay Target: APBB1IP  
Olink UniProt: Q7Z5R6  
UKB rsID: rs4749125  
Proxy rsID: rs4749125  
UKB SNP: 10:26727636:G:C  
Proxy SNP: 10:26727636:G:C  
UKB log10(p): 264.2  
UKB BETA: -0.216  
-----NA  
1080:843:725:695:604:494:487:

**S100A12 : NP5  
P80511**

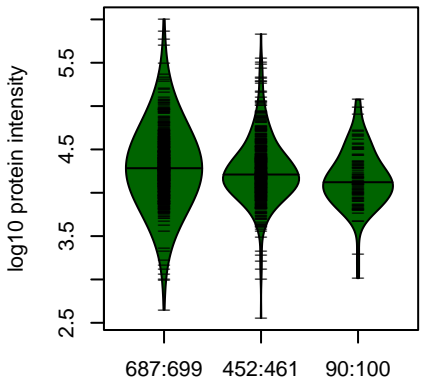

1:153337943:G:A\_A  
 $p = 6.2e-05$ ,  $\beta = -0.18$ ,  $N = 1229$

**GHFDTLSK pc2  
P80511**

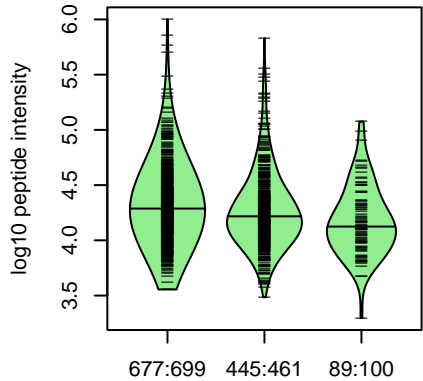

1:153337943:G:A\_A  
 $p = 2e-05$ ,  $\beta = -0.193$ ,  $N = 1211$

**TKLEEHLEGIVNIFHQYSVR pc4  
P80511**

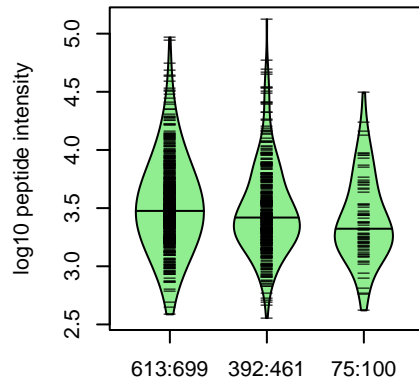

1:153337943:G:A\_A  
 $p = 0.00067$ ,  $\beta = -0.165$ ,  $N = 1080$

**LEEHLEGIVNIFHQYSVRK pc4  
P80511**

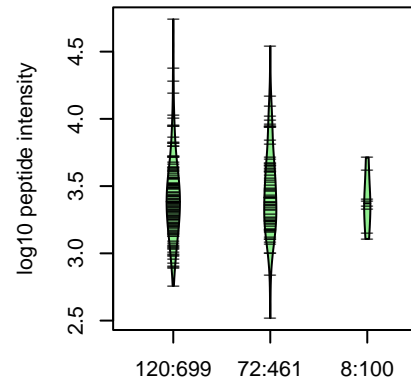

1:153337943:G:A\_A  
 $p = 0.81$ ,  $\beta = 0.03$ ,  $N = 200$

**LEEHLEGIVNIFHQYSVR pc4  
P80511**

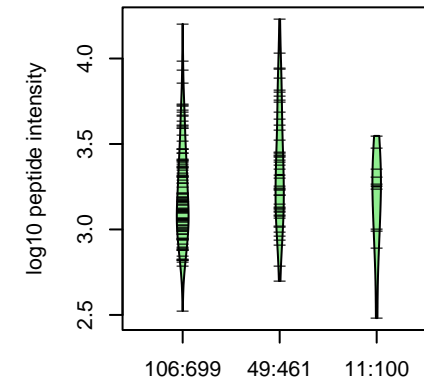

1:153337943:G:A\_A  
 $p = 0.29$ ,  $\beta = 0.13$ ,  $N = 166$

**S100A12 : NP5  
P80511**

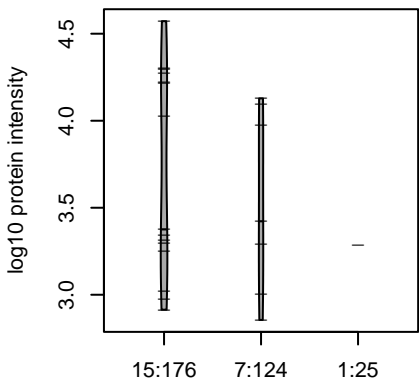

1:153337943:G:A\_A  
 $p = 0.35$ ,  $\beta = -0.314$ ,  $N = 23$

Assay Target: S100A12  
Olink UniProt: P80511  
UKB rsID: rs3014874  
Proxy rsID: rs3014874  
UKB SNP: 1:153337943:G:A  
Proxy SNP: 1:153337943:G:A  
UKB log10(p): 256.4  
UKB BETA: -0.235  
\*:~:-:-:-  
1211:1080:200:166:55:39



**ADA2 : NP4  
Q9NZK5**

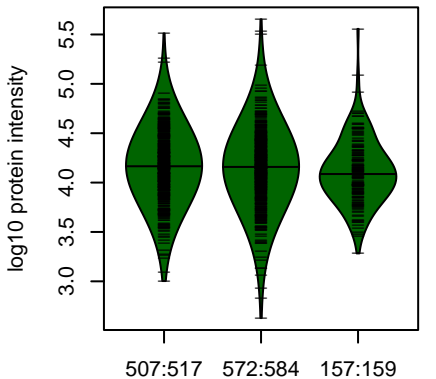

22:17709771:T:C\_T  
p = 0.097, beta = -0.0695, N = 1236

**SQVFNLR pc2  
B4E3Q4;Q9NZK5**

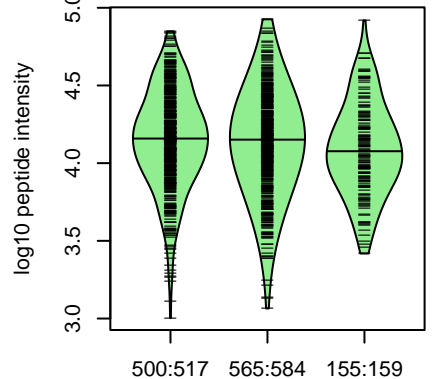

22:17709771:T:C\_T  
p = 0.051, beta = -0.0823, N = 1220

**WILLEDYR pc2  
A0A087X0I3;B4E3Q4;Q9NZK5**

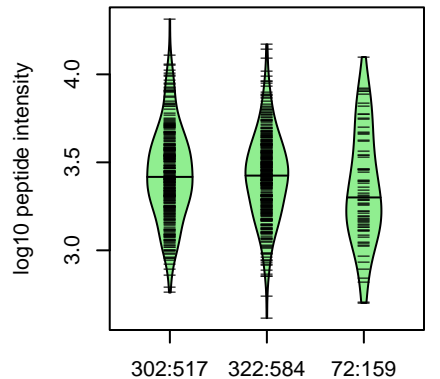

22:17709771:T:C\_T  
p = 0.071, beta = -0.104, N = 696

**IHPVATLMTGHPMVISSDDPAMFGAK  
A0A087X0I3;B4E3Q4;Q9NZK5;Q9NZF7X0I3;A0A3B3IRR5;B4E3Q4;Q9NZK5**

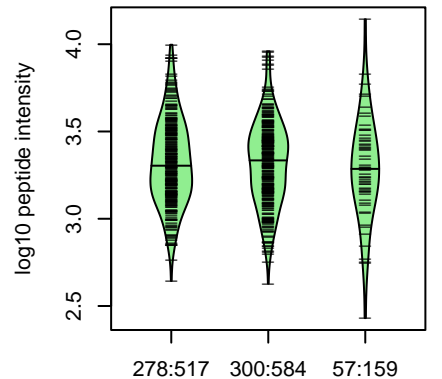

22:17709771:T:C\_T  
p = 0.35, beta = -0.0581, N = 635

**FVETHPEFIGIK pc2  
A0A087X0I3;B4E3Q4;Q9NZK5;Q9NZF7X0I3;A0A3B3IRR5;B4E3Q4;Q9NZK5**

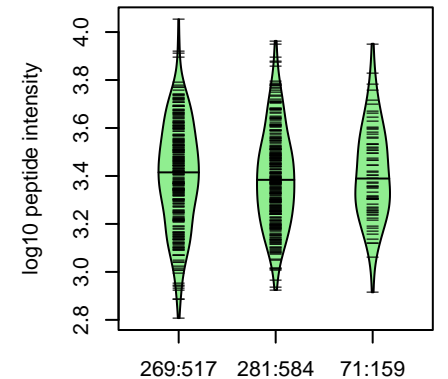

22:17709771:T:C\_T  
p = 0.89, beta = 0.00831, N = 621

**ADA2 : NP4  
B4E3Q4;Q9NZK5**

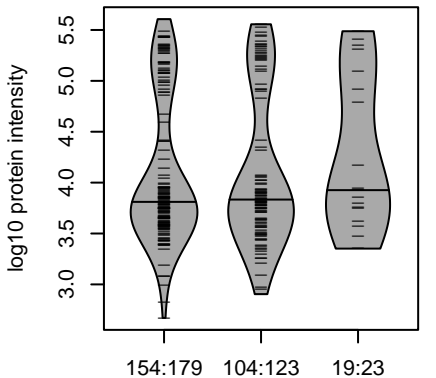

22:17709771:T:C\_T  
p = 0.47, beta = 0.069, N = 277

**SQVFNLR pc2  
B4E3Q4;Q9NZK5**

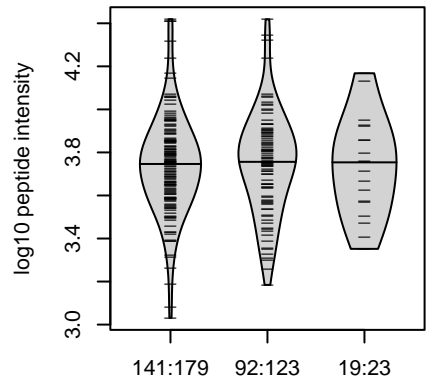

22:17709771:T:C\_T  
p = 0.66, beta = -0.0431, N = 252

**LLPVYELSGEHHDEEWSVK pc4  
A0A087X0I3;B4E3Q4;Q9NZK5**

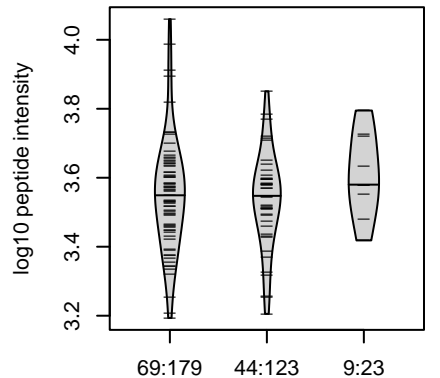

22:17709771:T:C\_T  
p = 0.98, beta = -0.00375, N = 122

**WILLEDYRK pc3  
A0A087X0I3;B4E3Q4;Q9NZK5**

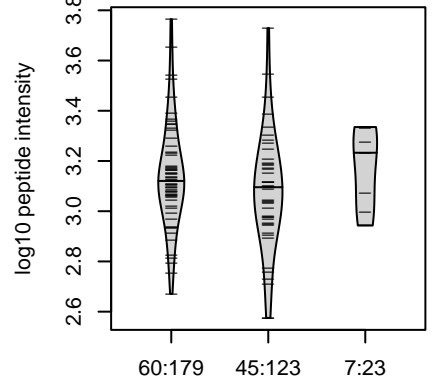

22:17709771:T:C\_T  
p = 0.37, beta = -0.135, N = 112

**FVETHPEFIGIK pc2  
7X0I3;A0A3B3IRR5;B4E3Q4;Q9NZK5**

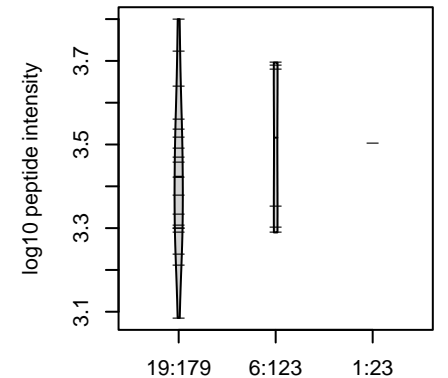

22:17709771:T:C\_T  
p = 0.56, beta = 0.196, N = 26

**FPTVVAGFDLVGHEDTGHSR pc3  
rs2231495 ALT**

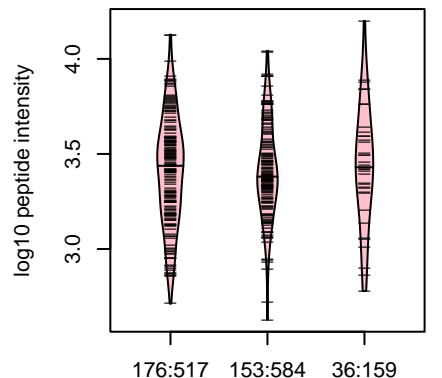

22:17709771:T:C\_T  
p = 0.001, model = REC, N = 365

**FPTVVAGFDLVGHEDTGHSR pc4  
rs2231495 ALT**

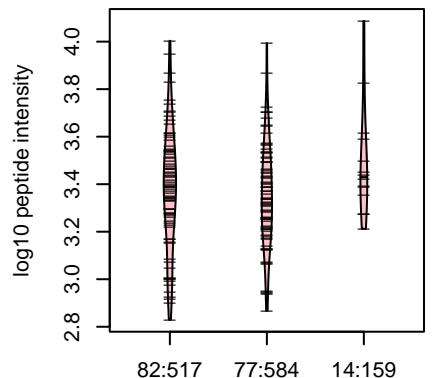

22:17709771:T:C\_T  
p = 0.064, model = DOM, N = 173

**FPTVVAGFDLVGHEDTGHSR pc3  
rs2231495 REF**

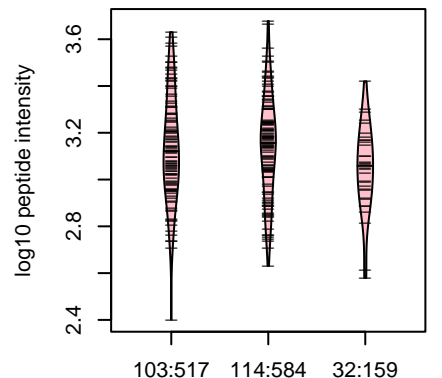

22:17709771:T:C\_T  
p = 0.92, model = DOM, N = 249

Assay Target: ADA2  
Olink UniProt: Q9NZK5  
UKB rsID: rs737963  
Proxy rsID: rs737963  
UKB SNP: 22:17709771:T:C  
Proxy SNP: 22:17709771:T:C  
UKB log10(p): 248.8  
UKB BETA: 0.209  
-----  
1220:696:635:621:545:541:516:



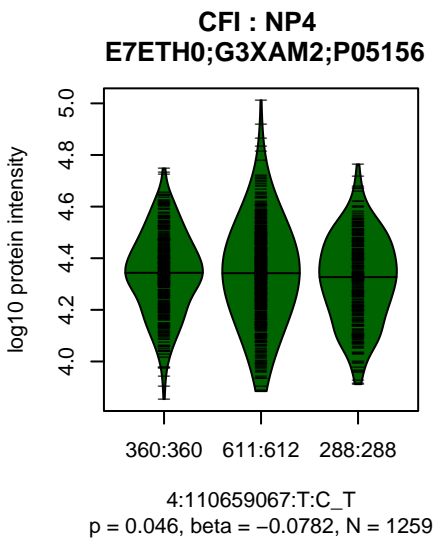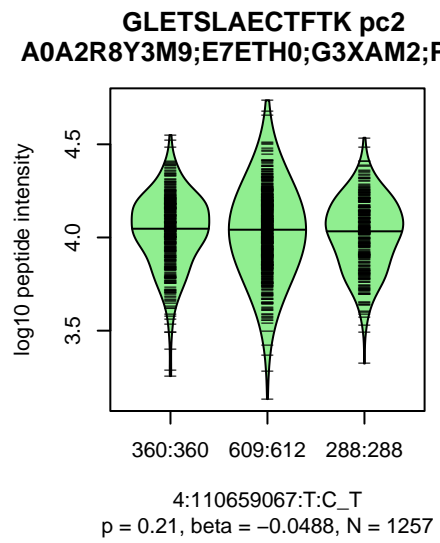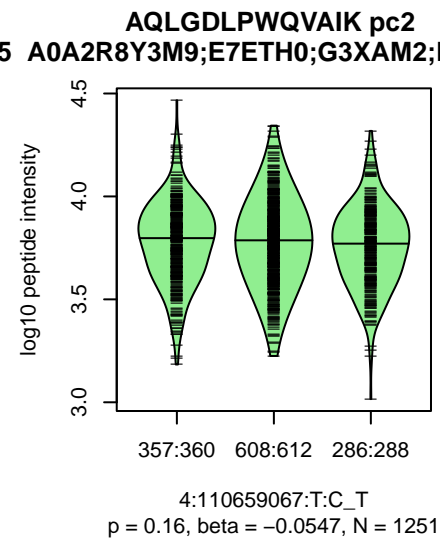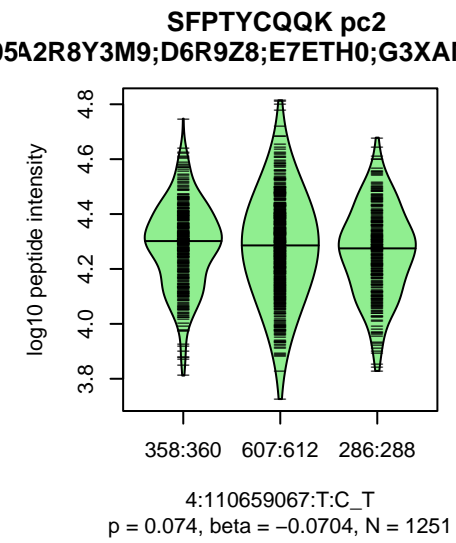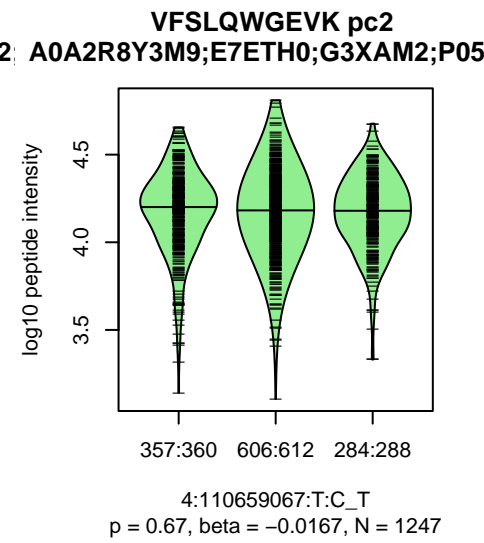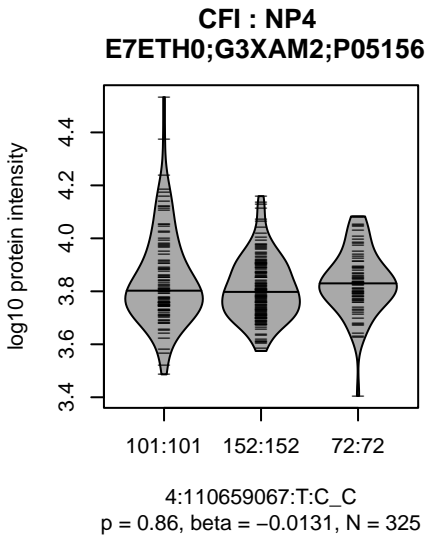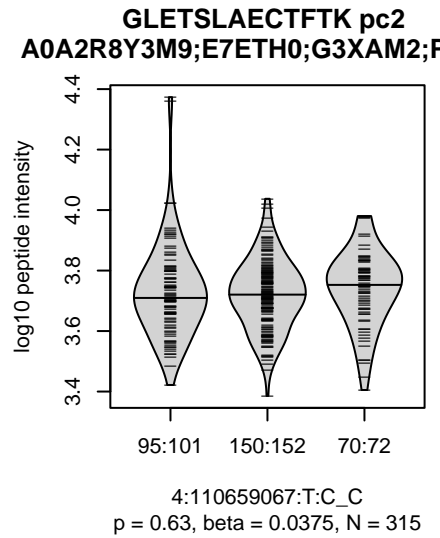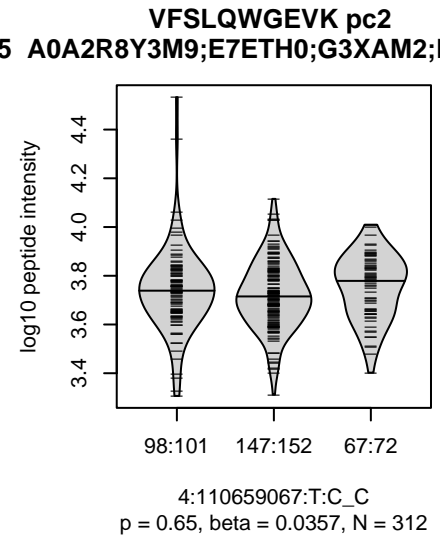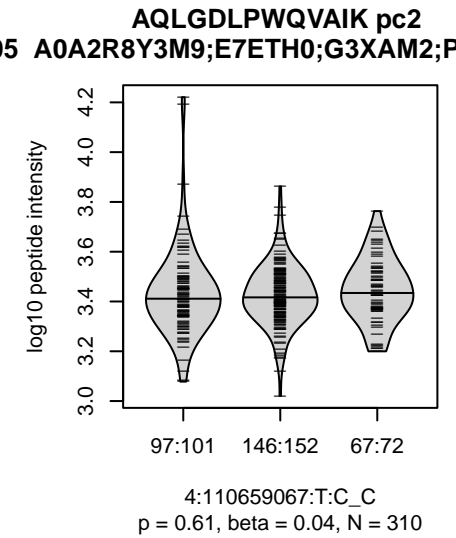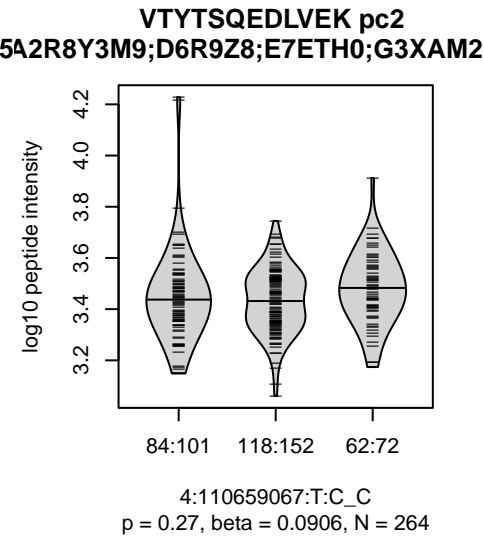

Assay Target: CFI  
 Olink UniProt: P05156  
 UKB rsID: rs10033900  
 Proxy rsID: rs10033900  
 UKB SNP: 4:110659067:T:C  
 Proxy SNP: 4:110659067:T:C  
 UKB log<sub>10</sub>(p): 244.9  
 UKB BETA: 0.199  
 -----  
 1257:1251:1251:1247:1234:122

**CCN5 : NP5  
O76076**

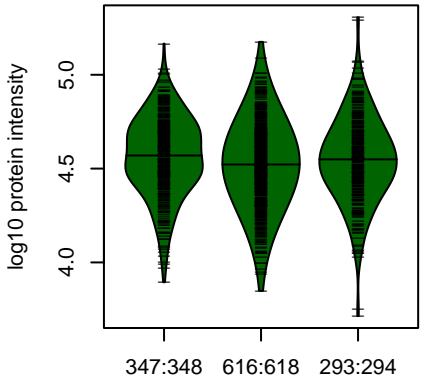

20:43322002:G:C\_G  
p = 0.019, beta = -0.0922, N = 1256

**EGETFQPHCSIR pc3  
O76076**

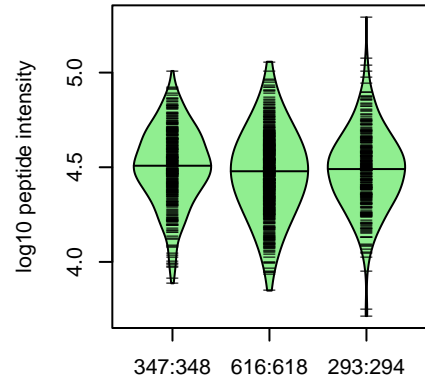

20:43322002:G:C\_G  
p = 0.026, beta = -0.0877, N = 1256

**LPSWDCPHPR pc3  
O76076**

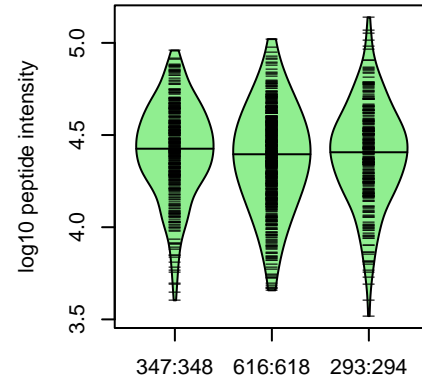

20:43322002:G:C\_G  
p = 0.053, beta = -0.0764, N = 1256

**3EPDQLHVCASQGLVCQPGAGPG(  
O76076;O76076-2**

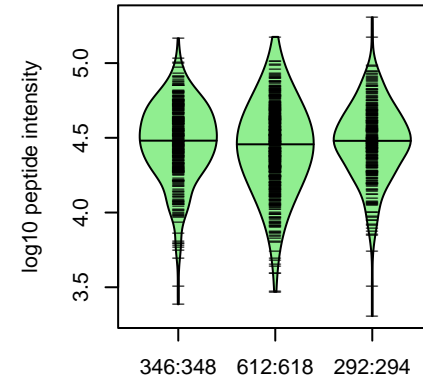

20:43322002:G:C\_G  
p = 0.14, beta = -0.0588, N = 1250

**CPLGVPLVLDGCGCCR pc2  
O76076;O76076-2**

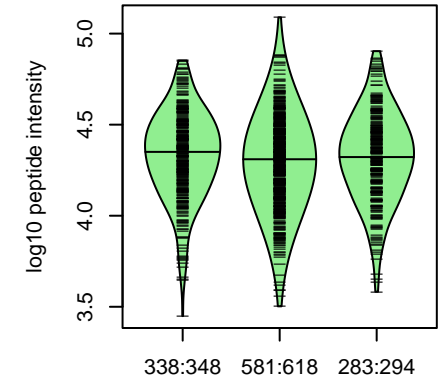

20:43322002:G:C\_G  
p = 0.078, beta = -0.0705, N = 1202

**CCN5 : NP5  
O76076**

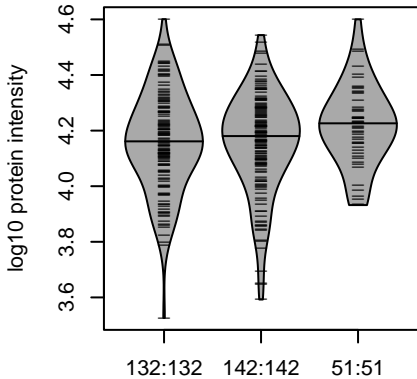

20:43322002:G:C\_C  
p = 0.23, beta = 0.0922, N = 325

**LPSWDCPHPR pc3  
O76076**

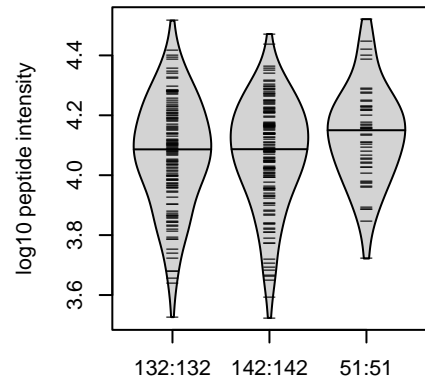

20:43322002:G:C\_C  
p = 0.2, beta = 0.0988, N = 325

**3EPDQLHVCASQGLVCQPGAGPG(  
O76076;O76076-2**

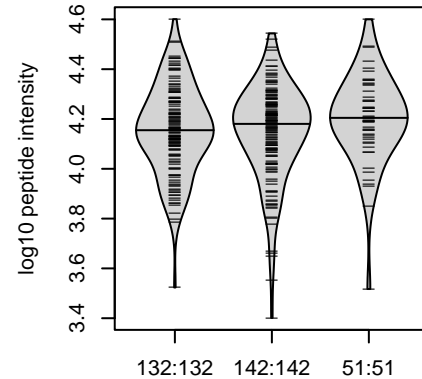

20:43322002:G:C\_C  
p = 0.35, beta = 0.072, N = 325

**CPLGVPLVLDGCGCCR pc2  
O76076;O76076-2**

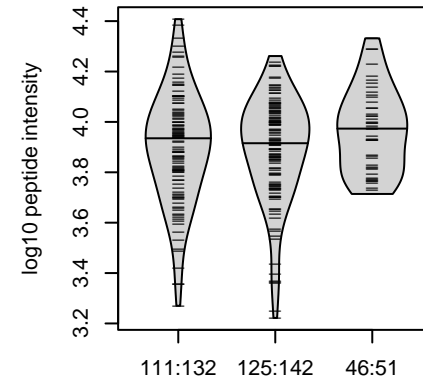

20:43322002:G:C\_C  
p = 0.37, beta = 0.0739, N = 282

**EGETFQPHCSIR pc3  
O76076**

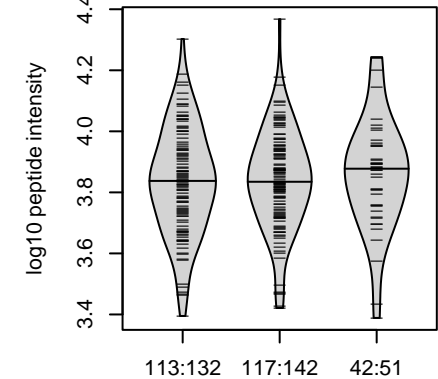

20:43322002:G:C\_C  
p = 0.86, beta = 0.0144, N = 272

Assay Target: CCN5  
Olink UniProt: O76076  
UKB rsID: rs6065746  
Proxy rsID: rs6065746  
UKB SNP: 20:43322002:G:C  
Proxy SNP: 20:43322002:G:C  
UKB log10(p): 243.7  
UKB BETA: 0.189  
-----NA  
1256:1256:1250:1202:1095:964



**B4GALT1 : NP2**  
**P15291**

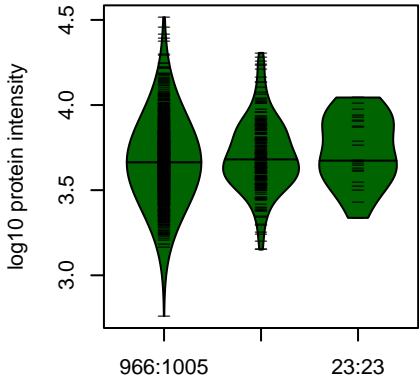

9:33113322:C:T\_T  
p = 0.025, beta = 0.139, N = 1216

**LLNVGFQEALK pc2**  
**P15291**

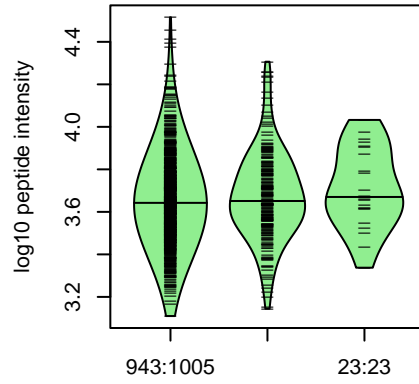

9:33113322:C:T\_T  
p = 0.05, beta = 0.122, N = 1191

**VAIIPFR pc2**  
**P15291;Q86XA6**

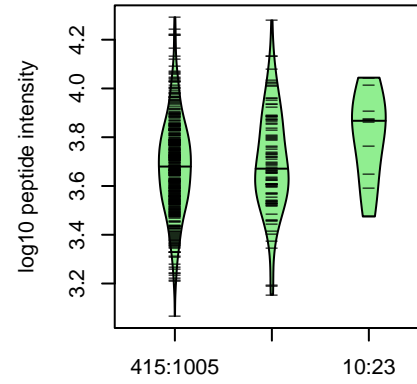

9:33113322:C:T\_T  
p = 0.054, beta = 0.18, N = 525

**ETMLSDGLNSLTYQVLDVQR pc3**  
**P15291**

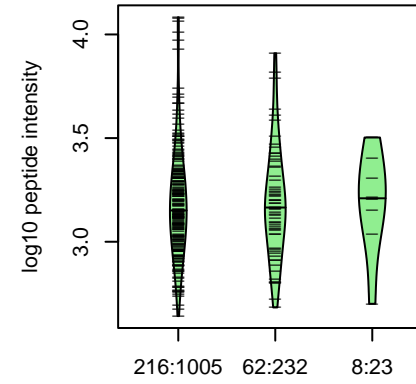

9:33113322:C:T\_T  
p = 0.87, beta = 0.0186, N = 286

**HISVAMDK pc2**  
**P15291**

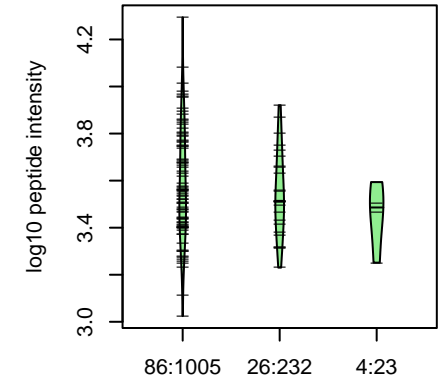

9:33113322:C:T\_T  
p = 0.2, beta = -0.222, N = 116

**B4GALT1 : NP2**  
**P15291**

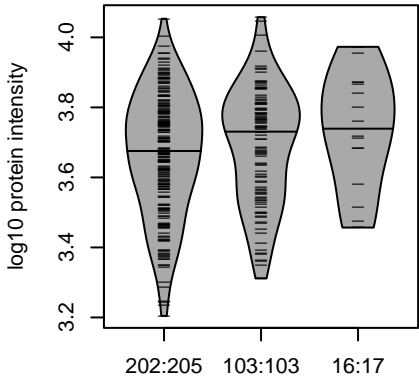

9:33113322:C:T\_T  
p = 0.0093, beta = 0.244, N = 321

**VAIIPFR pc2**  
**P15291;Q86XA6**

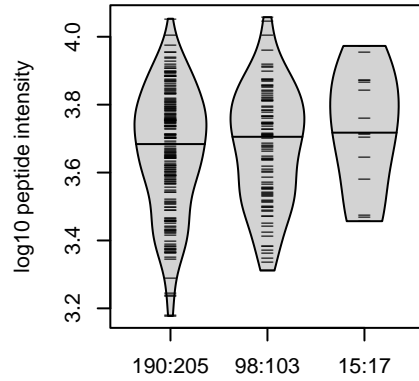

9:33113322:C:T\_T  
p = 0.03, beta = 0.209, N = 303

**LLNVGFQEALK pc2**  
**P15291**

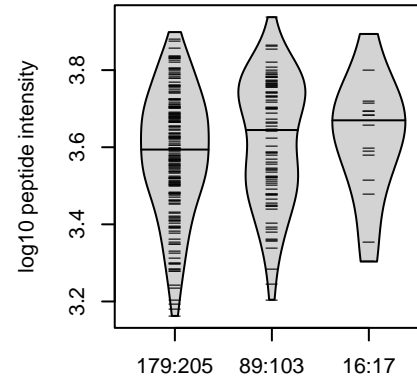

9:33113322:C:T\_T  
p = 0.009, beta = 0.254, N = 284

Assay Target: B4GALT1  
Olink UniProt: P15291  
UKB rsID: rs7019909  
Proxy rsID: rs7019909  
UKB SNP: 9:33113322:C:T  
Proxy SNP: 9:33113322:C:T  
UKB log10(p): 240.1  
UKB BETA: 0.314  
-:-:-:-:-:NA  
1191:525:286:116:89:74:9



**MAN1A2 : NP5  
O60476**

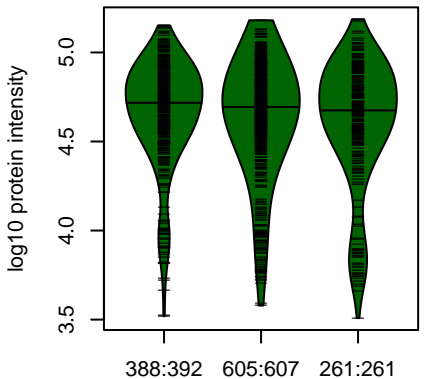

1:118096628:G:A\_G  
p = 0.24, beta = -0.0462, N = 1254

**RFDLGLLEDVLI PHVDAGK pc3  
O60476**

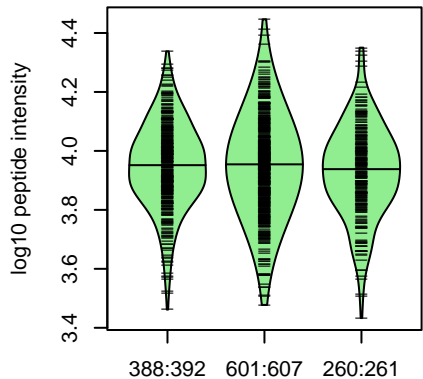

1:118096628:G:A\_G  
p = 0.71, beta = -0.0146, N = 1249

**FDGAVEAVAVR pc2  
O60476**

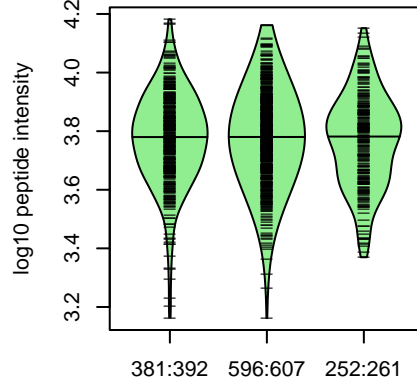

1:118096628:G:A\_G  
p = 0.54, beta = 0.0245, N = 1229

**MYDDAIEAIEK pc2  
O60476**

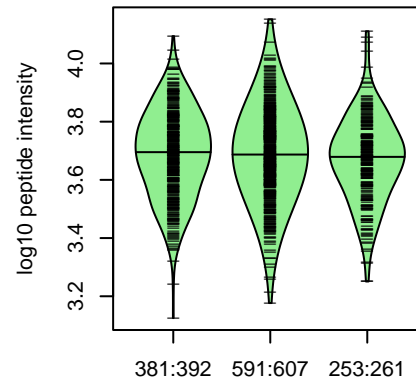

1:118096628:G:A\_G  
p = 0.49, beta = -0.0278, N = 1225

**GGLTFIGEWK pc2  
O60476**

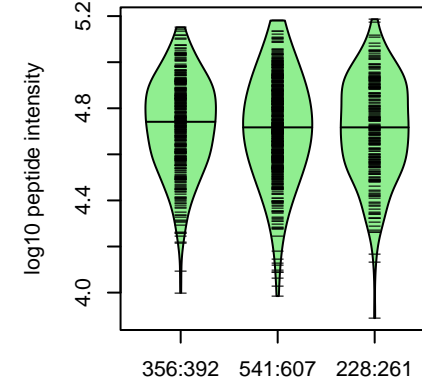

1:118096628:G:A\_G  
p = 0.83, beta = -0.00876, N = 1125

**MAN1A2 : NP5  
O60476**

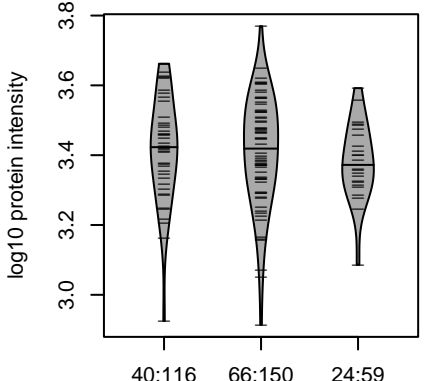

1:118096628:G:A\_A  
p = 0.21, beta = -0.157, N = 130

**AWLMSDK pc2  
O60476;P33908**

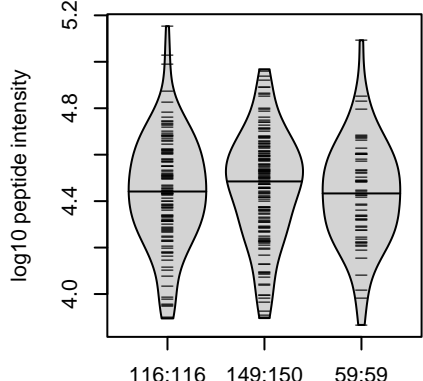

1:118096628:G:A\_A  
p = 0.88, beta = -0.012, N = 324

**RFDLGLLEDVLI PHVDAGK pc3  
O60476**

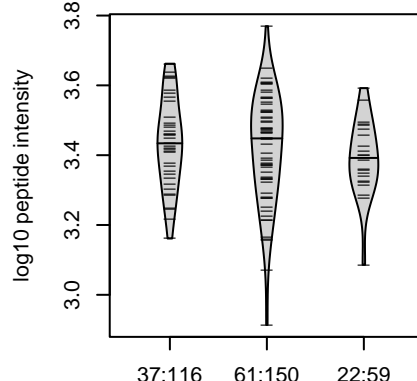

1:118096628:G:A\_A  
p = 0.18, beta = -0.173, N = 120

Assay Target: MAN1A2  
Olink UniProt: O60476  
UKB rsID: rs10923344  
Proxy rsID: rs10923344  
UKB SNP: 1:118096628:G:A  
Proxy SNP: 1:118096628:G:A  
UKB log10(p): 233.1  
UKB BETA: 0.195  
-----  
1249:1229:1225:1125:1124:998



**CDH5 : NP2  
P33151**

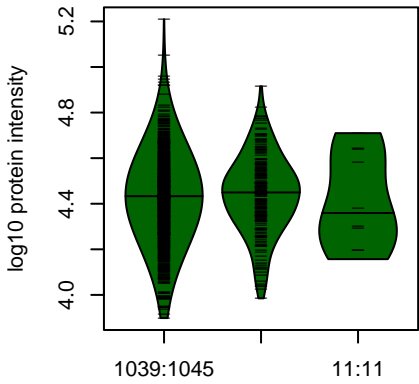

16:66432381:T:C\_C  
p = 0.68, beta = 0.0285, N = 1254

**VHFLPVVISDNGMPSR pc3  
P33151;P33151-2**

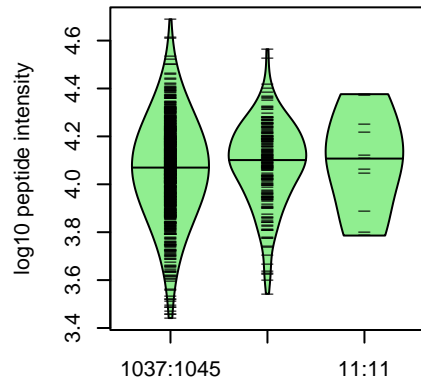

16:66432381:T:C\_C  
p = 0.13, beta = 0.105, N = 1252

**EYFAIDNSGR pc2  
I3L1J2;P33151;P33151-2**

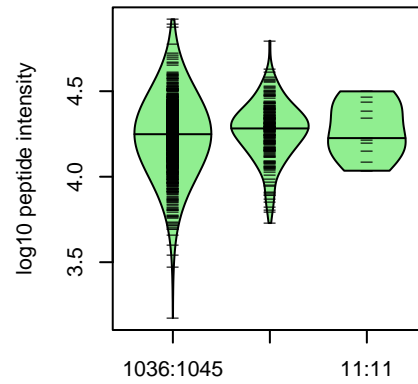

16:66432381:T:C\_C  
p = 0.05, beta = 0.136, N = 1251

**YTFVVPEDTR pc2  
I3L1J2;P33151;P33151-2**

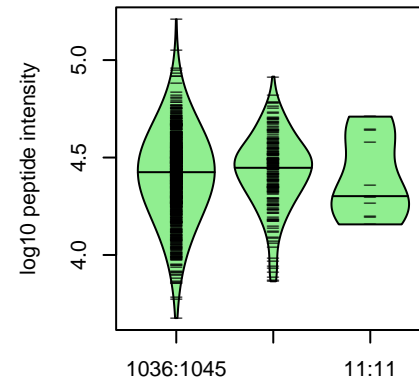

16:66432381:T:C\_C  
p = 0.61, beta = 0.0351, N = 1251

**DWIWNQMHIIEEK pc3  
H3BR11;I3L1J2;P33151;P33151-2**

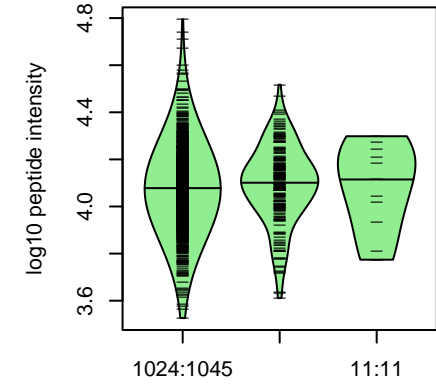

16:66432381:T:C\_C  
p = 0.18, beta = 0.0927, N = 1238

**CDH5 : NP2  
P33151**

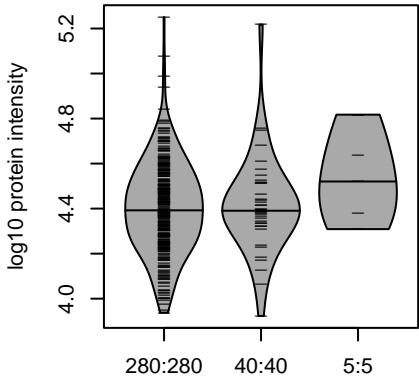

16:66432381:T:C\_C  
p = 0.13, beta = 0.205, N = 325

**EYFAIDNSGR pc2  
I3L1J2;P33151;P33151-2**

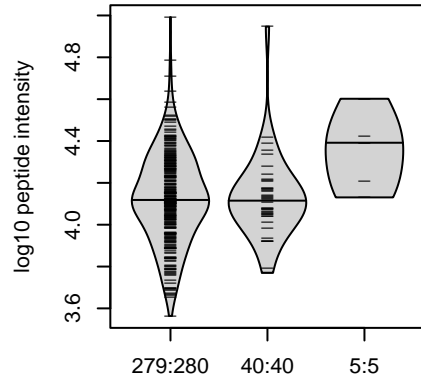

16:66432381:T:C\_C  
p = 0.081, beta = 0.238, N = 324

**YTFVVPEDTR pc2  
I3L1J2;P33151;P33151-2**

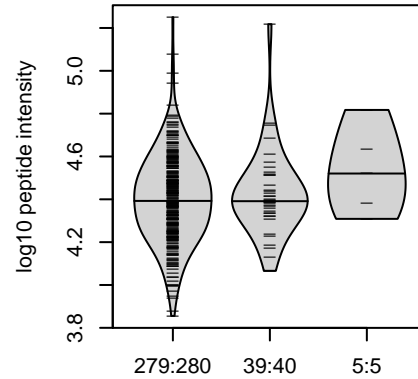

16:66432381:T:C\_C  
p = 0.067, beta = 0.251, N = 323

**VHFLPVVISDNGMPSR pc3  
P33151;P33151-2**

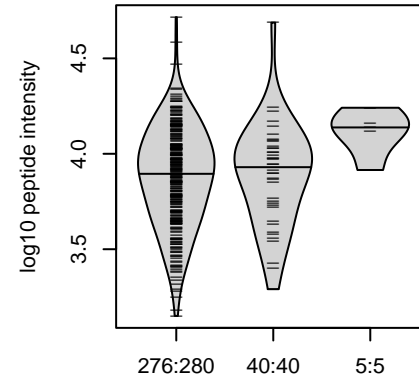

16:66432381:T:C\_C  
p = 0.056, beta = 0.261, N = 321

**VDAETGDVFAIER pc2  
I3L1J2;P33151;P33151-2**

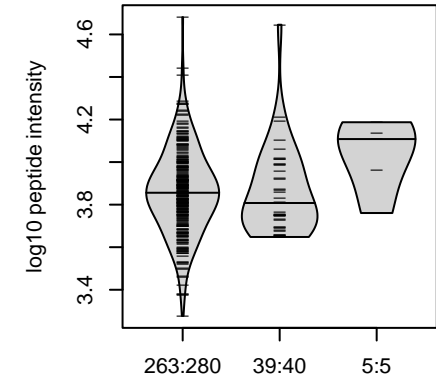

16:66432381:T:C\_C  
p = 0.19, beta = 0.179, N = 307

Assay Target: CDH5  
Olink UniProt: P33151  
UKB rsID: rs16956504  
Proxy rsID: rs16956504  
UKB SNP: 16:66432381:T:C  
Proxy SNP: 16:66432381:T:C  
UKB log10(p): 230.2  
UKB BETA: 0.296  
-----\*-----  
1252:1251:1251:1238:1238:122

**CLEC3B : NP4  
P05452**

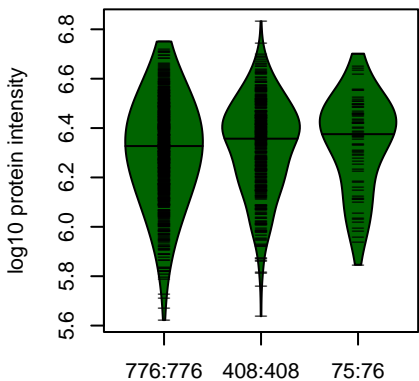

3:45057108:A:T\_T  
p = 0.025, beta = 0.104, N = 1259

**CRDQLPYICQFGIV pc2  
E9PHK0;P05452**

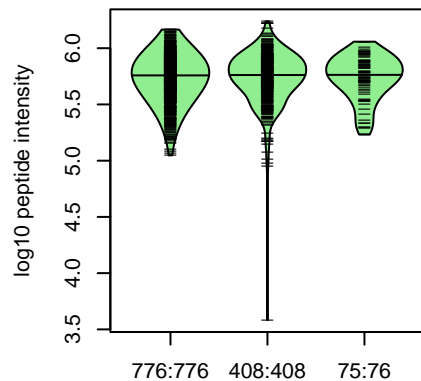

3:45057108:A:T\_T  
p = 0.38, beta = 0.0404, N = 1259

**LDTLAQEVALLK pc2  
E9PHK0;P05452**

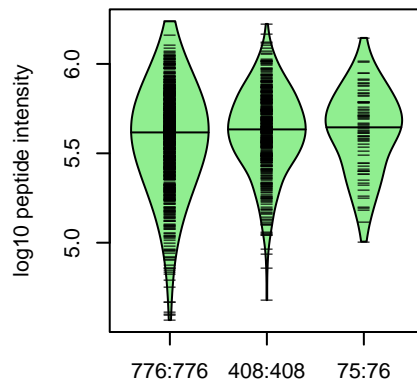

3:45057108:A:T\_T  
p = 0.02, beta = 0.108, N = 1259

**NWETEITAQPDGGK pc2  
E9PHK0;P05452**

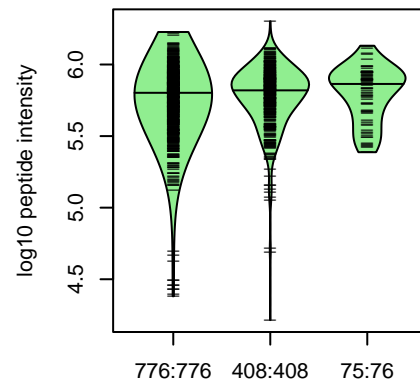

3:45057108:A:T\_T  
p = 0.09, beta = 0.0785, N = 1259

**SRLDTLAQEVALLK pc3  
E9PHK0;P05452**

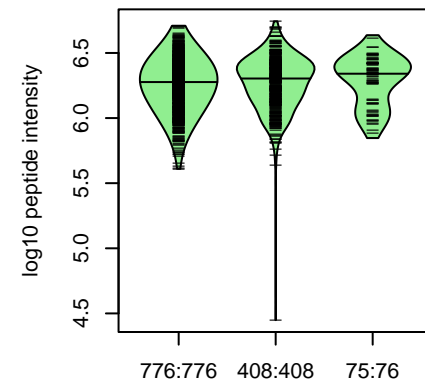

3:45057108:A:T\_T  
p = 0.058, beta = 0.088, N = 1259

**CLEC3B : NP4  
P05452**

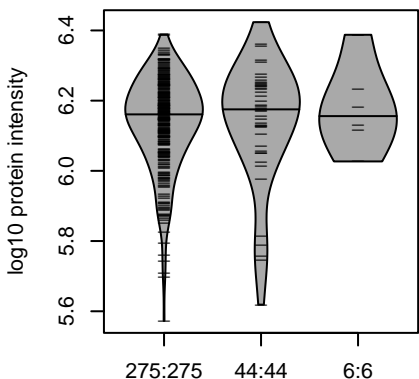

3:45057108:A:T\_T  
p = 0.089, beta = 0.22, N = 325

**CFLAFTQTK pc2  
E9PHK0;P05452**

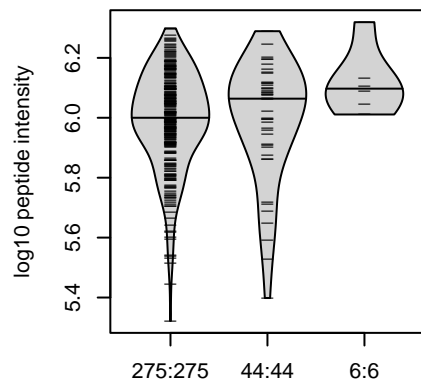

3:45057108:A:T\_T  
p = 0.058, beta = 0.245, N = 325

**CRDQLPYICQFGIV pc2  
E9PHK0;P05452**

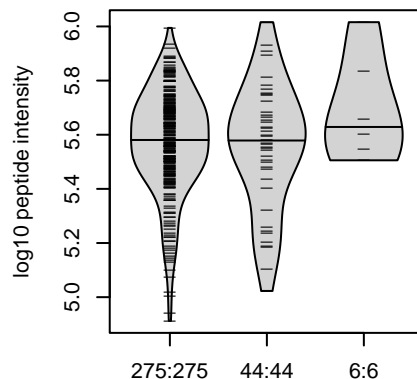

3:45057108:A:T\_T  
p = 0.14, beta = 0.192, N = 325

**EQQALQTVCLK pc2  
E9PHK0;P05452**

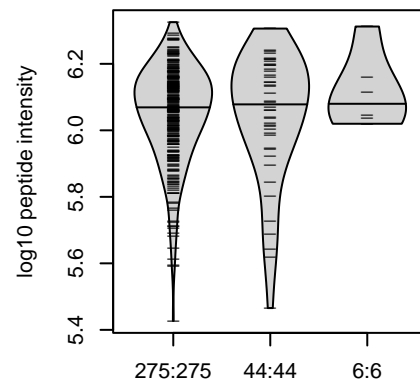

3:45057108:A:T\_T  
p = 0.16, beta = 0.18, N = 325

**LDTLAQEVALLK pc2  
E9PHK0;P05452**

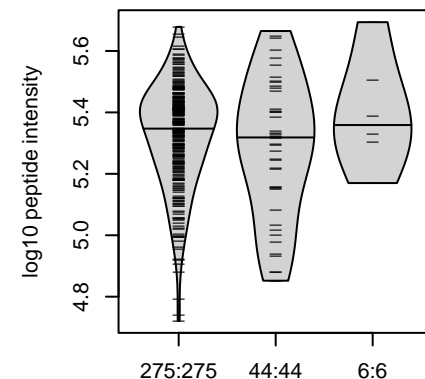

3:45057108:A:T\_T  
p = 0.49, beta = 0.0897, N = 325

**GGTLGTPQTGSENDALYEYLR pc3  
rs13963 REF**

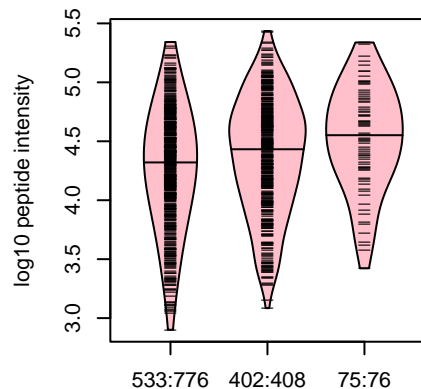

3:45057108:A:T\_T  
p = 1.2e-48, model = REC, N = 1010

**GGTLSTPQTGSENDALYEYLR pc3  
rs13963 ALT**

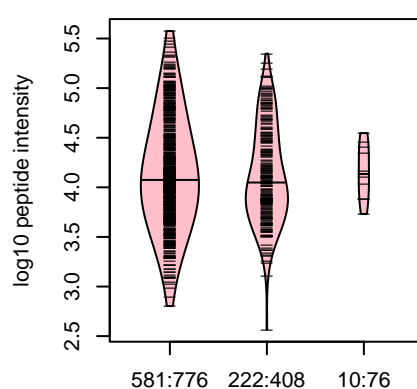

3:45057108:A:T\_T  
p = 4.7e-22, model = REC, N = 813

**GGTLGTPQTGSENDALYEYLR pc4  
rs13963 REF**

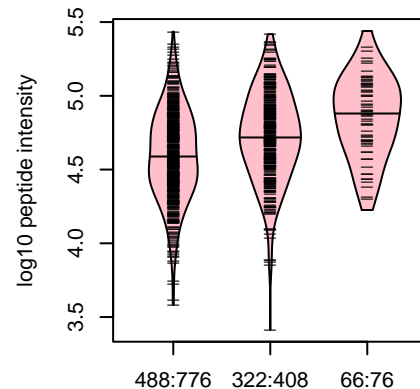

3:45057108:A:T\_T  
p = 4.9e-11, model = REC, N = 876

**GGTLSTPQTGSENDALYEYLR pc4  
rs13963 ALT**

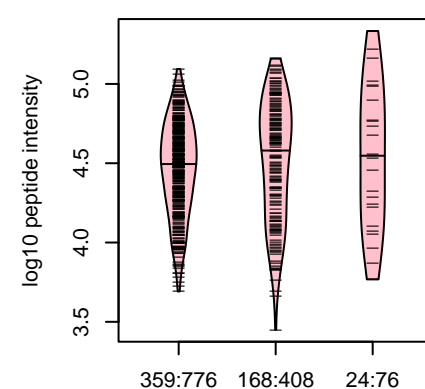

3:45057108:A:T\_T  
p = 0.023, model = REC, N = 551

Assay Target: CLEC3B  
Olink UniProt: P05452  
UKB rsID: rs13065490  
Proxy rsID: rs13065490  
UKB SNP: 3:45057108:A:T  
Proxy SNP: 3:45057108:A:T  
UKB log10(p): 228.8  
UKB BETA: 0.226  
-----  
1259:1259:1259:1259:1259:125



**RNASE1 : NP4**  
**P07998**

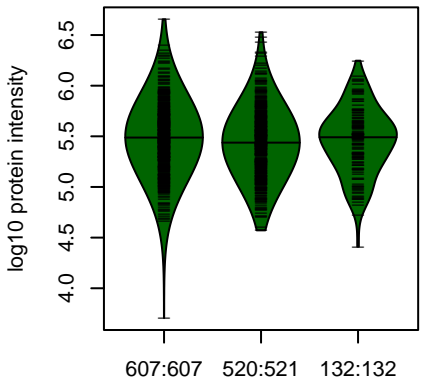

14:21280678:G:A\_G  
p = 0.02, beta = -0.0975, N = 1259

**SNSSMHITDCR pc2**  
**G3V357;P07998**

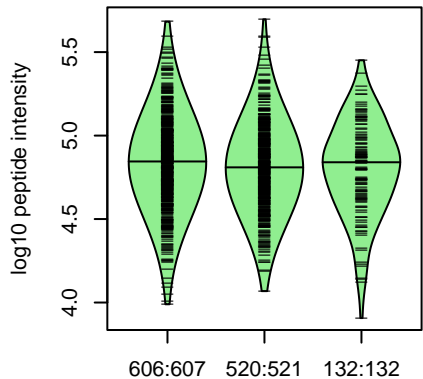

14:21280678:G:A\_G  
p = 0.053, beta = -0.0816, N = 1258

**NGQGNCYK pc2**  
**G3V357;P07998**

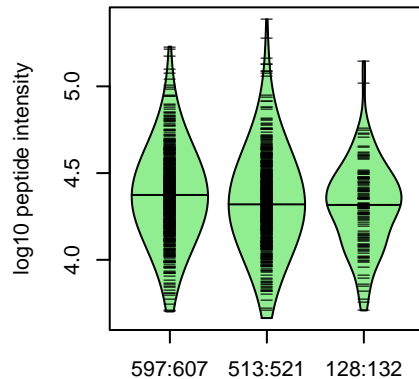

14:21280678:G:A\_G  
p = 0.00092, beta = -0.141, N = 1238

**QHMDSDSSPSSSSTYCNQMMR pc2**  
**P07998**

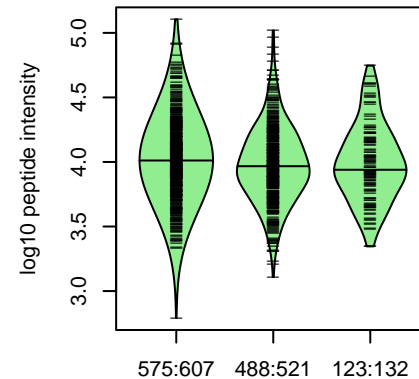

14:21280678:G:A\_G  
p = 0.013, beta = -0.107, N = 1186

**HIIVACEGSPYVPVHFDASVEDST pc2**  
**G3V357;P07998**

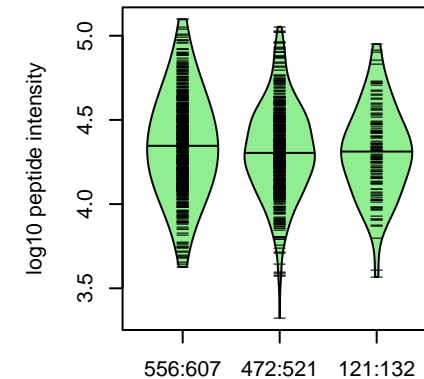

14:21280678:G:A\_G  
p = 0.02, beta = -0.103, N = 1149

**RNASE1 : NP4**  
**P07998**

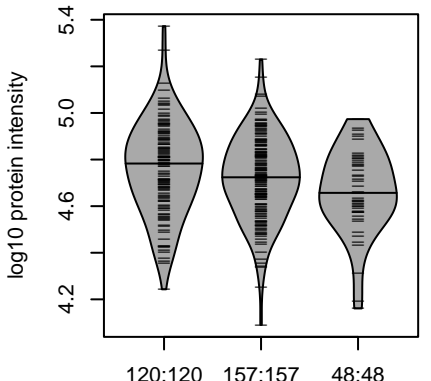

14:21280678:G:A\_G  
p = 0.014, beta = -0.195, N = 325

**CKPVNTFVHEPLVDVQNVCFQEK pc3**  
**G3V357;P07998**

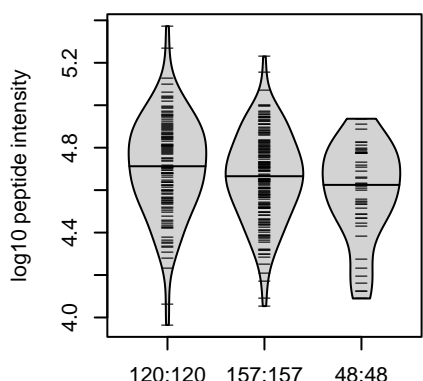

14:21280678:G:A\_G  
p = 0.0099, beta = -0.206, N = 325

**SNSSMHITDCR pc3**  
**G3V357;P07998**

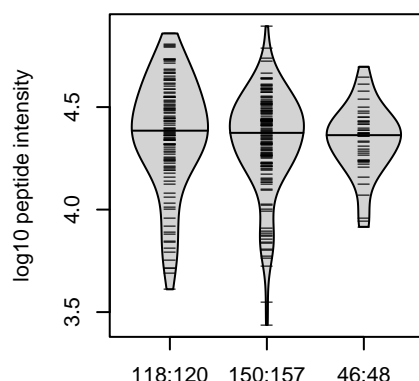

14:21280678:G:A\_G  
p = 0.038, beta = -0.168, N = 314

**NGQGNCYK pc2**  
**G3V357;P07998**

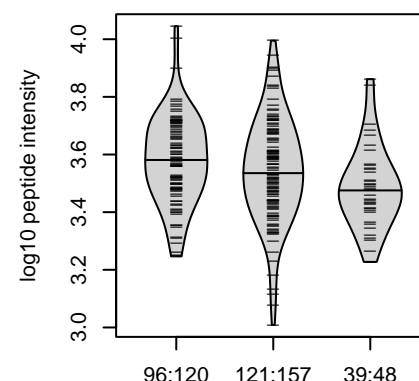

14:21280678:G:A\_G  
p = 0.022, beta = -0.204, N = 256

**YPNCAYR pc2**  
**G3V357;P07998**

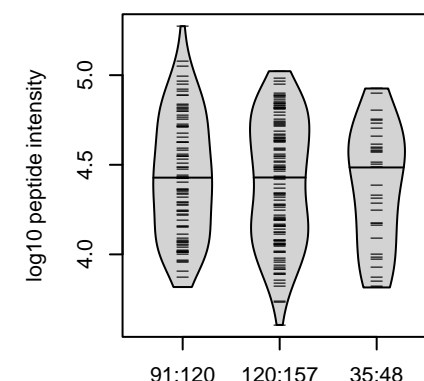

14:21280678:G:A\_G  
p = 0.34, beta = -0.0891, N = 246

Assay Target: RNASE1  
Olink UniProt: P07998  
UKB rsID: rs17254387  
Proxy rsID: rs17254387  
UKB SNP: 14:21280678:G:A  
Proxy SNP: 14:21280678:G:A  
UKB log10(p): 226.5  
UKB BETA: 0.206  
-----\*-----  
1258:1256:1238:1186:1149:114

**CD5L : NP4  
O43866**

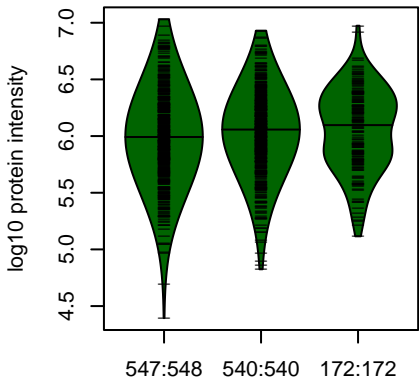

1:157804648:G:A\_A  
p = 0.11, beta = 0.0653, N = 1259

**GQWGTVCDDGWDIK pc2  
O43866**

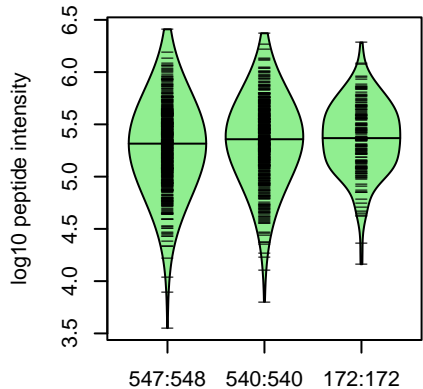

1:157804648:G:A\_A  
p = 0.054, beta = 0.0778, N = 1259

**GVWGSVCCDNWGEK pc2  
O43866**

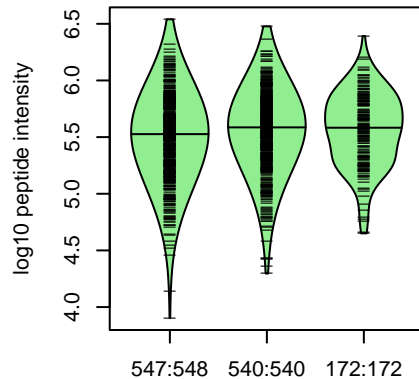

1:157804648:G:A\_A  
p = 0.081, beta = 0.0706, N = 1259

**CYGPVGR pc2  
O43866**

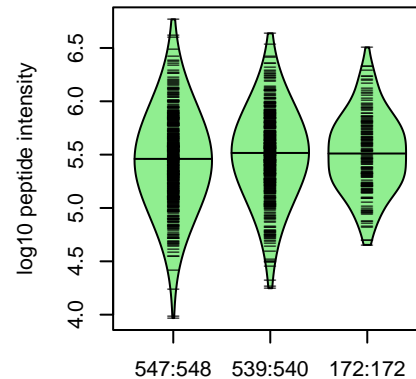

1:157804648:G:A\_A  
p = 0.12, beta = 0.0635, N = 1258

**LVGGDNLCSGR pc2  
O43866**

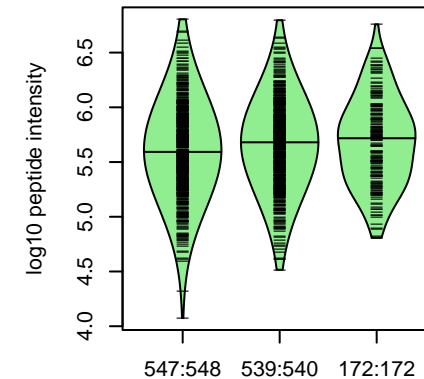

1:157804648:G:A\_A  
p = 0.043, beta = 0.0819, N = 1258

**CD5L : NP4  
O43866**

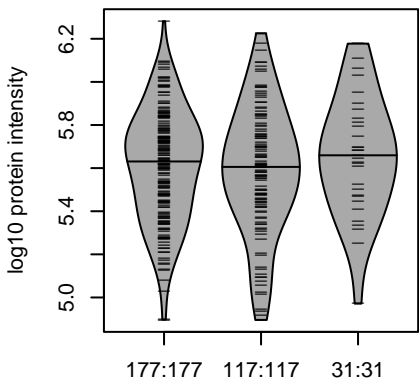

1:157804648:G:A\_A  
p = 0.41, beta = 0.0682, N = 325

**EATLQDCPSGPWVGK pc2  
O43866**

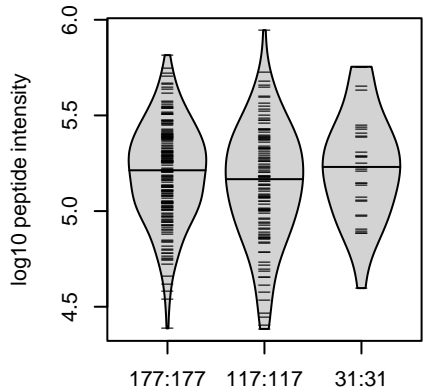

1:157804648:G:A\_A  
p = 0.92, beta = 0.00838, N = 325

**GQWGTVCDDGWDIK pc2  
O43866**

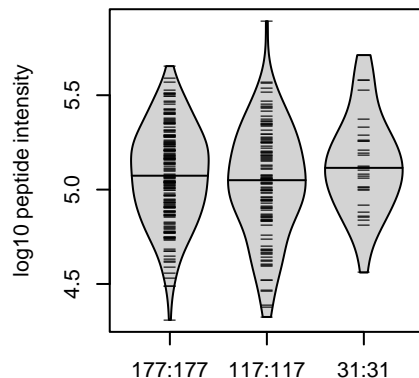

1:157804648:G:A\_A  
p = 0.54, beta = 0.0506, N = 325

**GVWGSVCCDNWGEK pc2  
O43866**

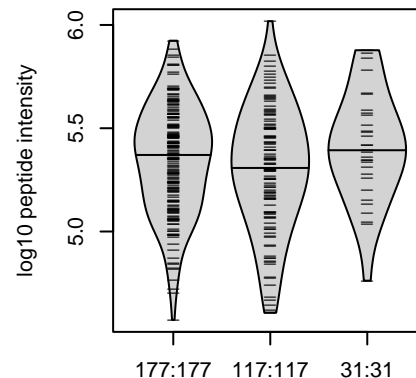

1:157804648:G:A\_A  
p = 0.59, beta = 0.0442, N = 325

**LVGGDNLCSGR pc2  
O43866**

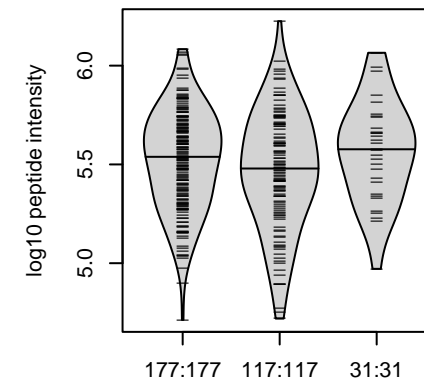

1:157804648:G:A\_A  
p = 0.82, beta = 0.0193, N = 325

Assay Target: CD5L  
Olink UniProt: O43866  
UKB rsID: rs2765501  
Proxy rsID: rs2765501  
UKB SNP: 1:157804648:G:A  
Proxy SNP: 1:157804648:G:A  
UKB log10(p): 225.7  
UKB BETA: 0.199  
-----  
1259:1259:1258:1258:1254:124

**COL5A1 : NP2  
P20908**

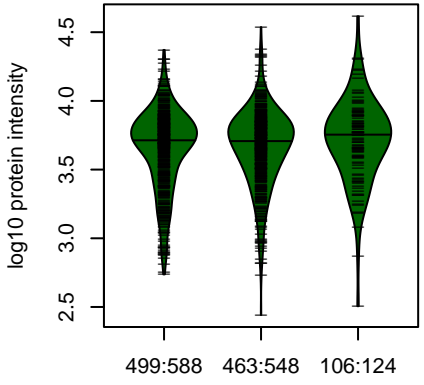

9:137533634:C:G\_G  
 $p = 0.38$ ,  $\beta = 0.0405$ ,  $N = 1068$

**TTGFCATR pc2  
P20908-2;P20908**

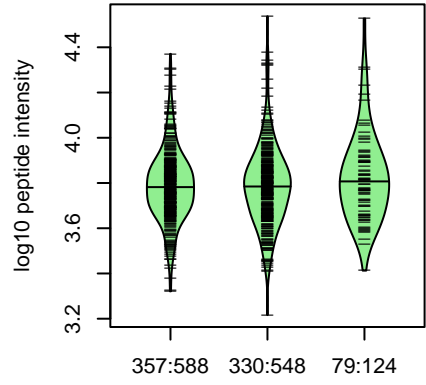

9:137533634:C:G\_G  
 $p = 0.91$ ,  $\beta = -0.00591$ ,  $N = 766$

**DAQLSAPTK pc2  
P20908-2;P20908**

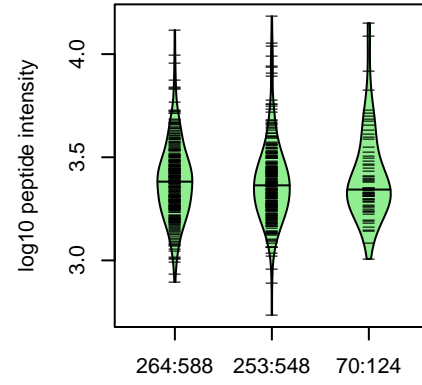

9:137533634:C:G\_G  
 $p = 0.51$ ,  $\beta = -0.0395$ ,  $N = 587$

**SDHPMIDINGIIVFGTR pc3  
P20908-2;P20908**

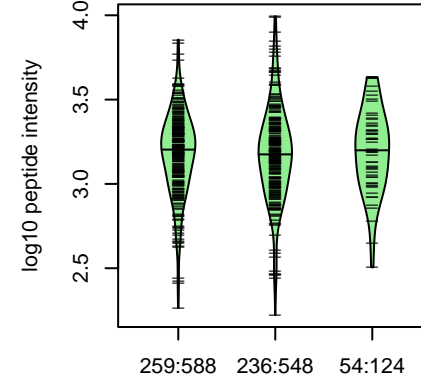

9:137533634:C:G\_G  
 $p = 0.75$ ,  $\beta = -0.0204$ ,  $N = 549$

**TVLEIDTPK pc2  
P20908-2;P20908**

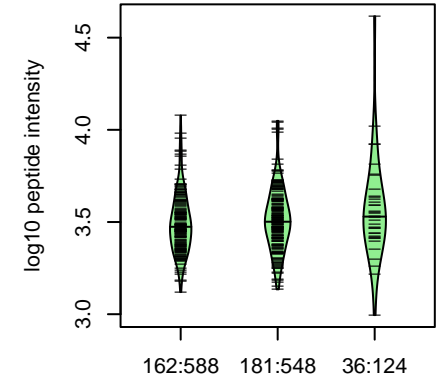

9:137533634:C:G\_G  
 $p = 0.2$ ,  $\beta = 0.101$ ,  $N = 379$

**COL5A1 : NP2  
P20908**

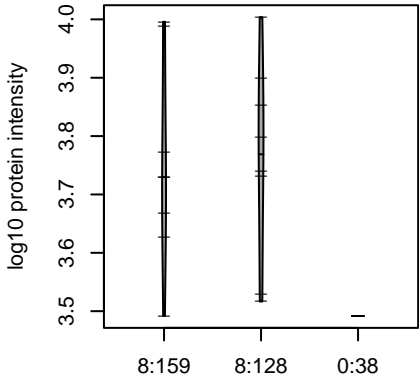

9:137533634:C:G\_G  
 $p = 0.55$ ,  $\beta = -0.274$ ,  $N = 16$

Assay Target: COL5A1  
Olink UniProt: P20908  
UKB rsID: rs12002679  
Proxy rsID: rs12002679  
UKB SNP: 9:137533634:C:G  
Proxy SNP: 9:137533634:C:G  
UKB log10(p): 223.2  
UKB BETA: 0.221  
-----  
766:587:549:379:237:136:119:4

**MAMDC2 : NP2  
Q7Z304**

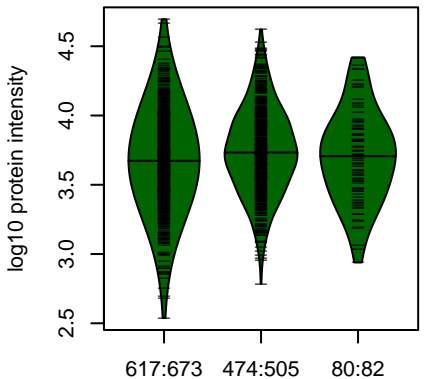

9:72594981:G:T\_T  
p = 0.0097, beta = 0.121, N = 1171

**IWSVLESPR pc2  
Q7Z304**

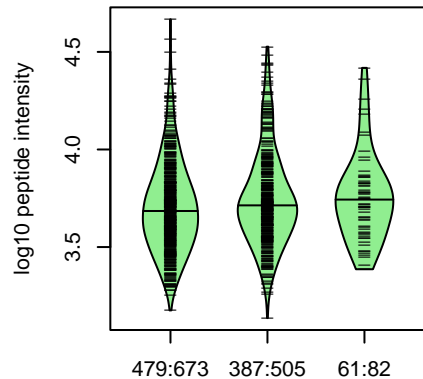

9:72594981:G:T\_T  
p = 0.004, beta = 0.152, N = 927

**WNPVNVFVGGGSIR pc2  
Q7Z304**

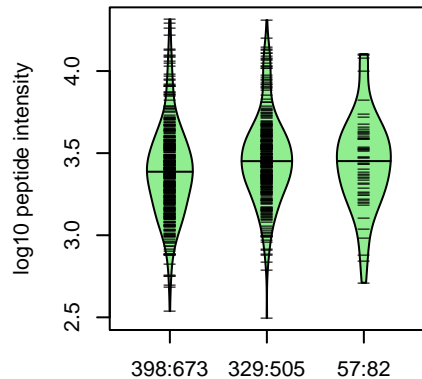

9:72594981:G:T\_T  
p = 0.00064, beta = 0.193, N = 784

**NVHSILPQDHTFK pc3  
Q7Z304**

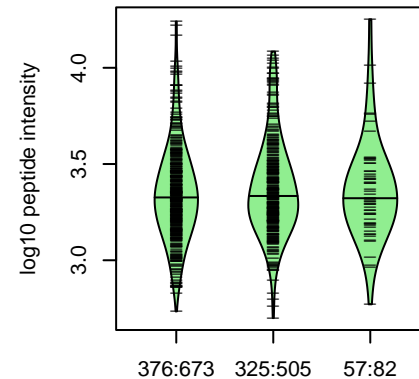

9:72594981:G:T\_T  
p = 0.14, beta = 0.084, N = 758

**SELGHYMYVDSVYVK pc3  
Q7Z304**

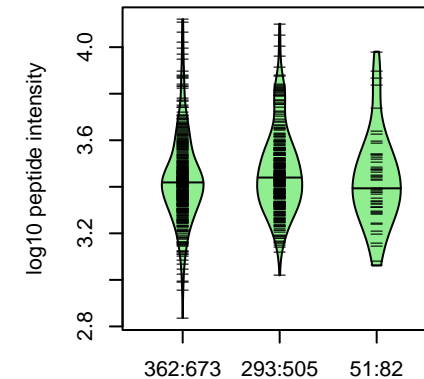

9:72594981:G:T\_T  
p = 0.14, beta = 0.0877, N = 706

**MAMDC2 : NP2  
Q7Z304**

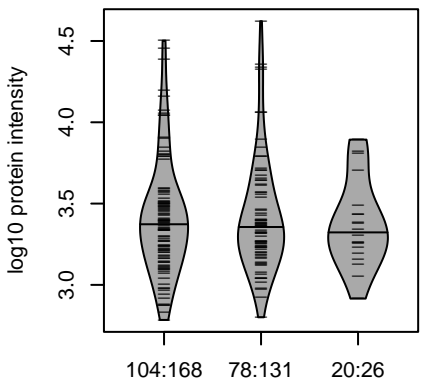

9:72594981:G:T\_T  
p = 0.58, beta = -0.0573, N = 202

**AGDHTTGLGYLLANTK pc3  
Q7Z304**

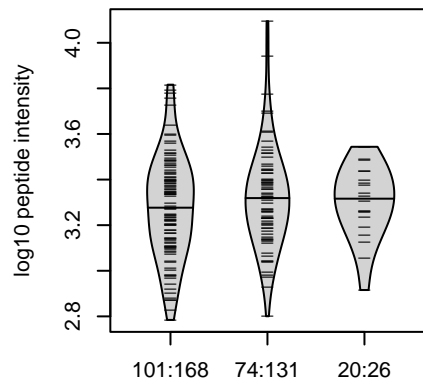

9:72594981:G:T\_T  
p = 0.39, beta = 0.0899, N = 195

**SELGHYMYVDSVYVK pc3  
Q7Z304**

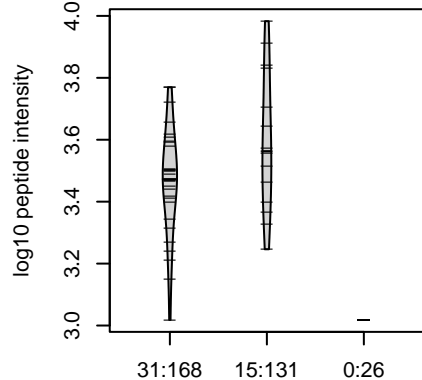

9:72594981:G:T\_T  
p = 0.089, beta = 0.502, N = 46

**IWSVLESPR pc2  
Q7Z304**

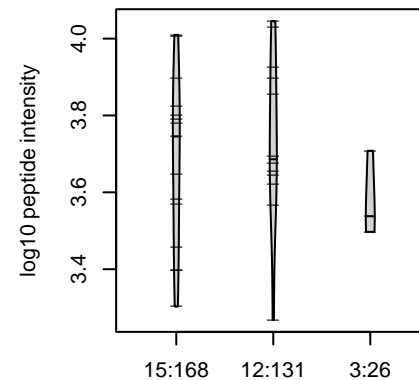

9:72594981:G:T\_T  
p = 0.61, beta = -0.132, N = 30

Assay Target: MAMDC2  
Olink UniProt: Q7Z304  
UKB rsID: rs12683555  
Proxy rsID: rs12683555  
UKB SNP: 9:72594981:G:T  
Proxy SNP: 9:72594981:G:T  
UKB log10(p): 222  
UKB BETA: 0.213  
\*:\*:-----  
927:784:758:706:692:371:345:2

**SPON2 : NP2  
Q9BUD6**

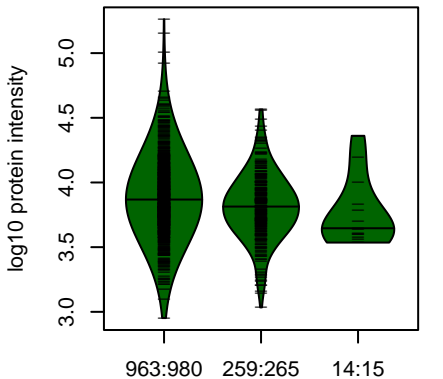

4:1165748:T:C\_C  
p = 1.9e-05, beta = -0.269, N = 1236

**HSLVSFVVR pc2  
Q9BUD6**

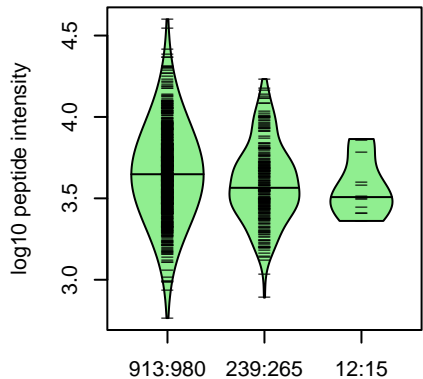

4:1165748:T:C\_C  
p = 2e-05, beta = -0.28, N = 1164

**NQYVSNGLR pc2  
Q9BUD6**

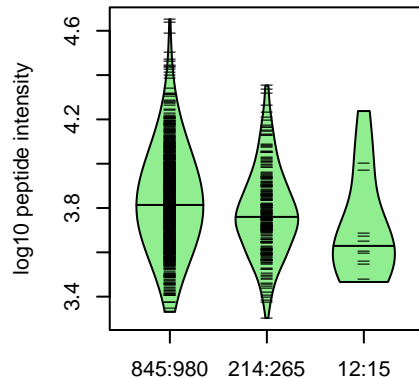

4:1165748:T:C\_C  
p = 5.4e-06, beta = -0.312, N = 1071

**WSQTAFPK pc2  
Q9BUD6**

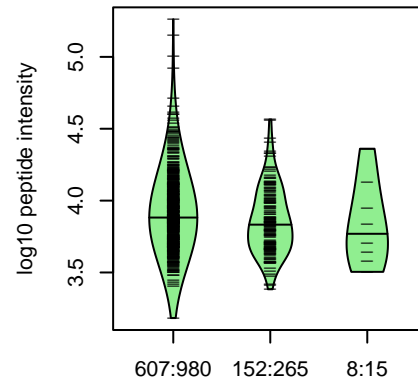

4:1165748:T:C\_C  
p = 0.0073, beta = -0.219, N = 767

**AFIPPAPVLPSR pc2  
Q9BUD6**

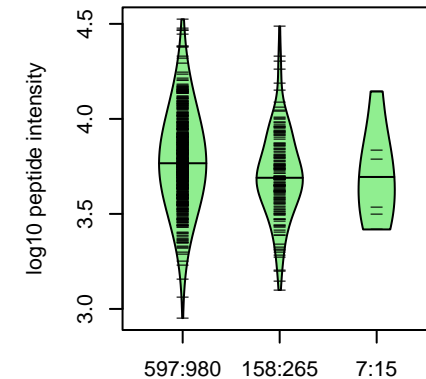

4:1165748:T:C\_C  
p = 8.9e-05, beta = -0.319, N = 762

**SPON2 : NP2  
Q9BUD6**

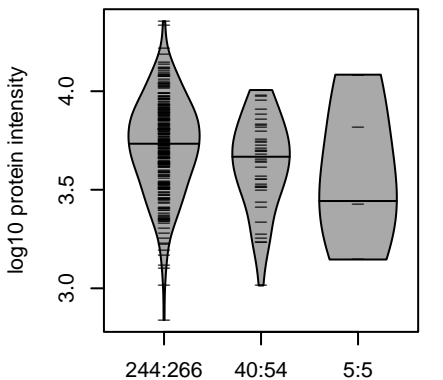

4:1165748:T:C\_C  
p = 0.021, beta = -0.317, N = 289

**YSITFTGK pc2  
Q9BUD6**

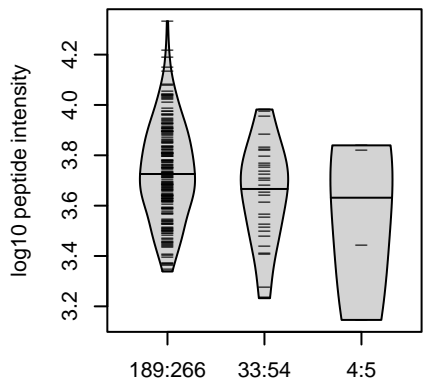

4:1165748:T:C\_C  
p = 0.01, beta = -0.388, N = 226

**HSLVSFVVR pc2  
Q9BUD6**

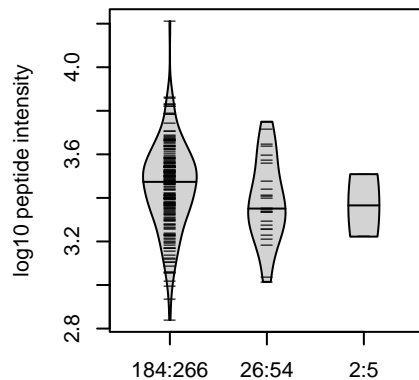

4:1165748:T:C\_C  
p = 0.079, beta = -0.316, N = 212

Assay Target: SPON2  
Olink UniProt: Q9BUD6  
UKB rsID: rs6836335  
Proxy rsID: rs6836335  
UKB SNP: 4:1165748:T:C  
Proxy SNP: 4:1165748:T:C  
UKB log10(p): 221.2  
UKB BETA: 0.293  
\*.\*.\*.\*.\*-  
1164:1071:767:762:733:478







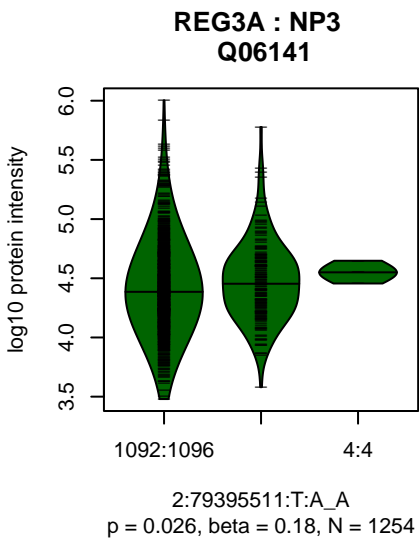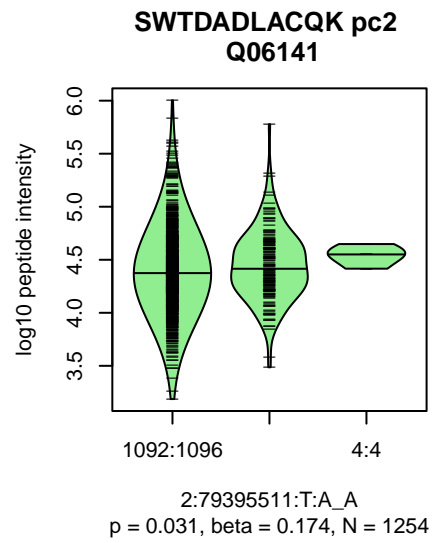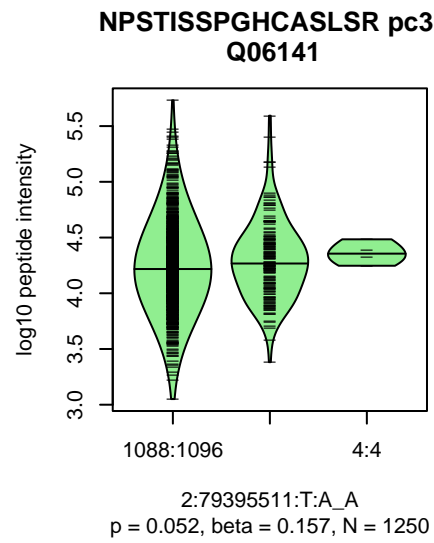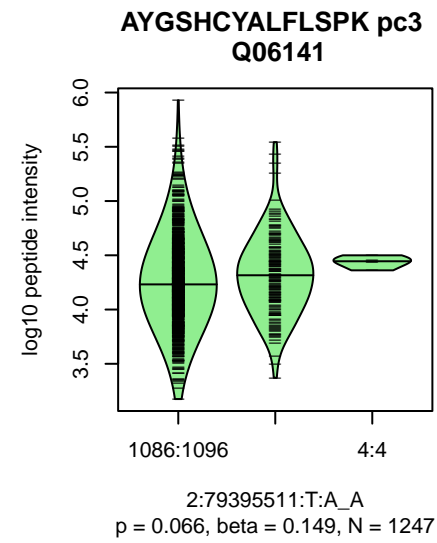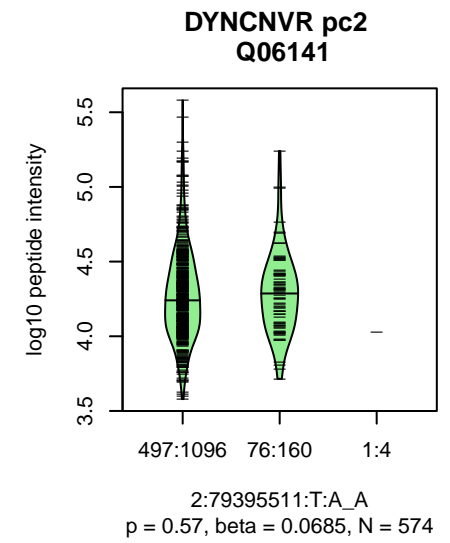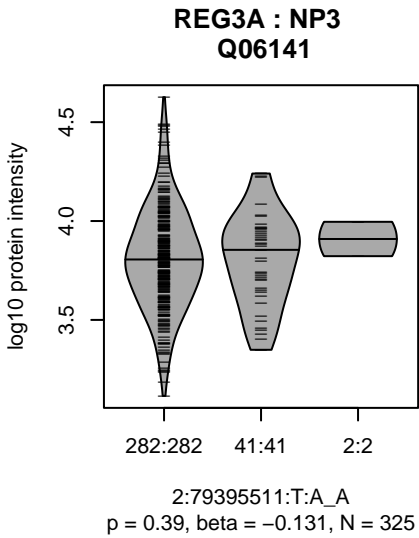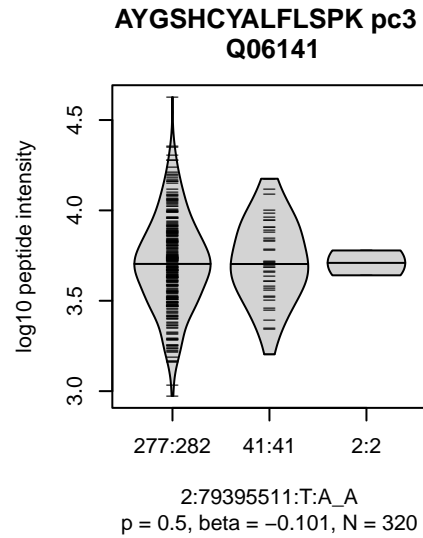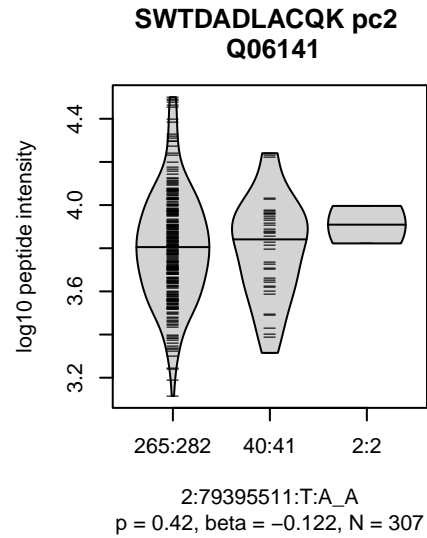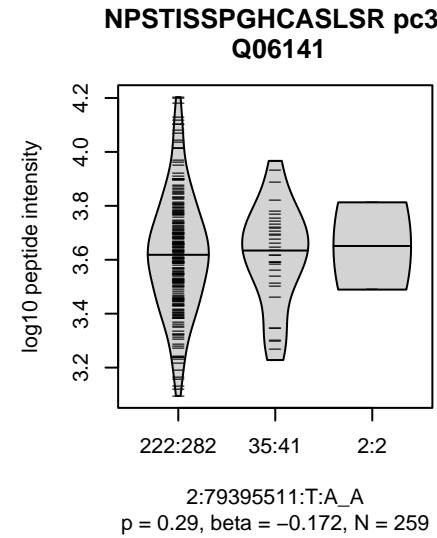

Assay Target: REG3A  
 Olink UniProt: Q06141  
 UKB rsID: rs147616162  
 Proxy rsID: rs147616162  
 UKB SNP: 2:79395511:T:A  
 Proxy SNP: 2:79395511:T:A  
 UKB log10(p): 215.7  
 UKB BETA: 0.396  
 - - - - -  
 1254:1250:1247:694:574:324:17

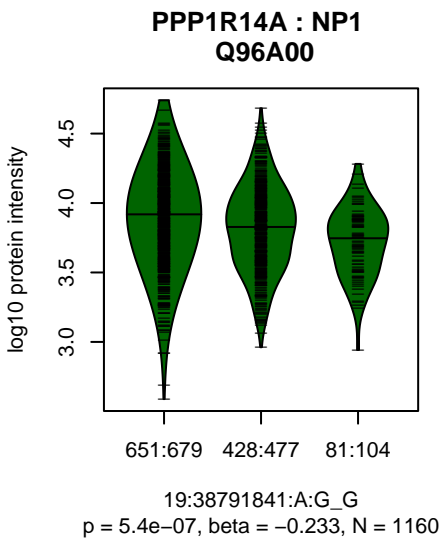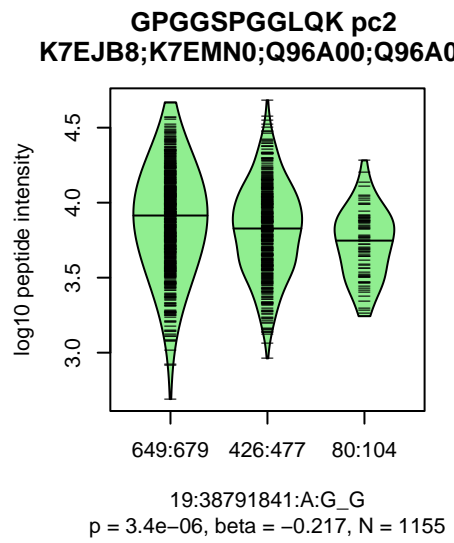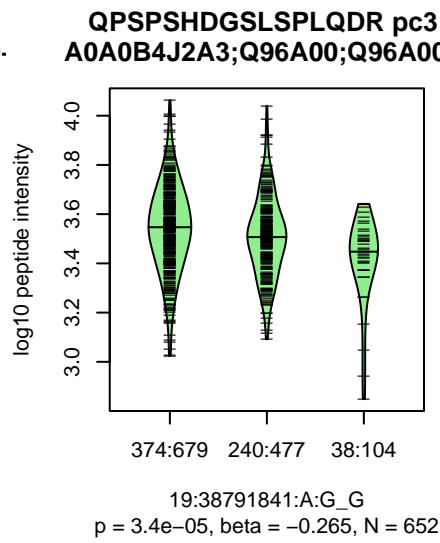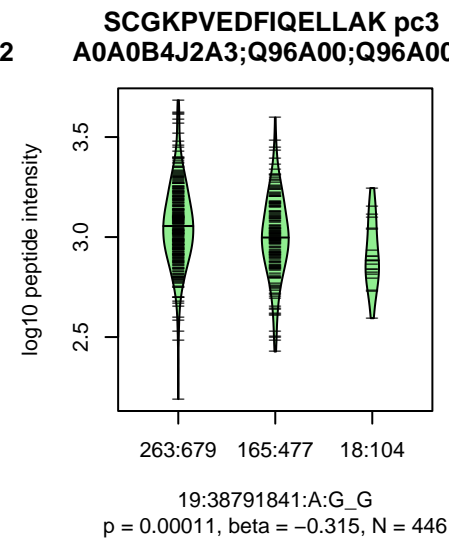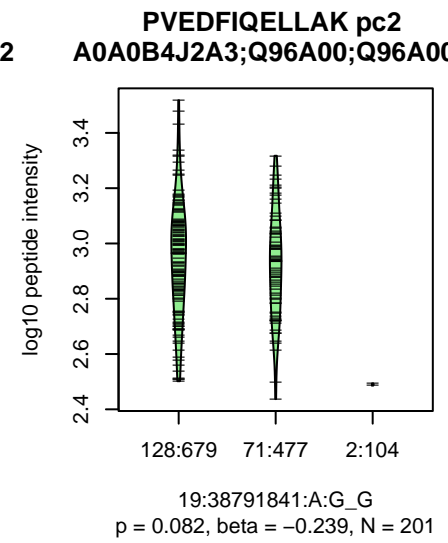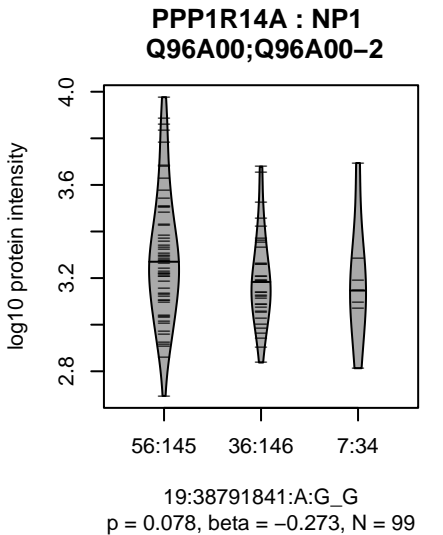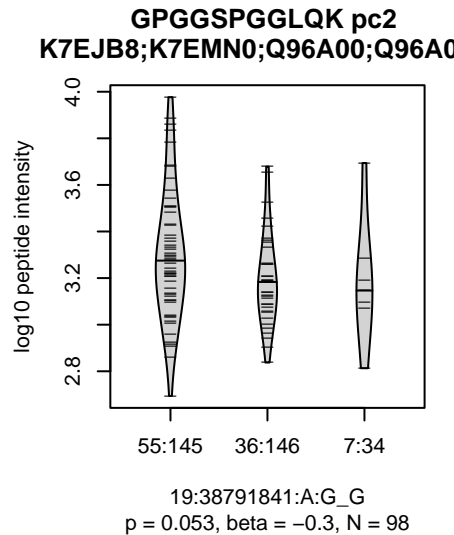

Assay Target: PPP1R14A  
 Olink UniProt: Q96A00  
 UKB rsID: rs71354995  
 Proxy rsID: rs71354995  
 UKB SNP: 19:38791841:A:G  
 Proxy SNP: 19:38791841:A:G  
 UKB log10(p): 215  
 UKB BETA: -0.221  
 \*.\*.\*.-.-  
 1155:652:446:201:90

**EFEMP1 : NP5  
Q12805**

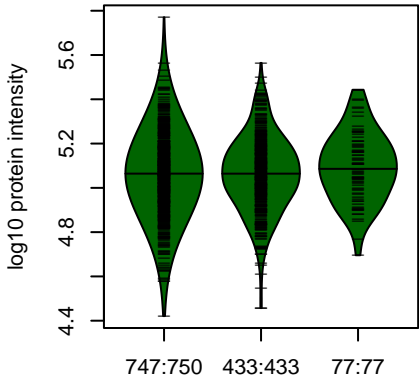

2:56096892:A:G\_G  
p = 0.25, beta = 0.0525, N = 1257

**CVCPVSNAMCR pc2  
Q12805**

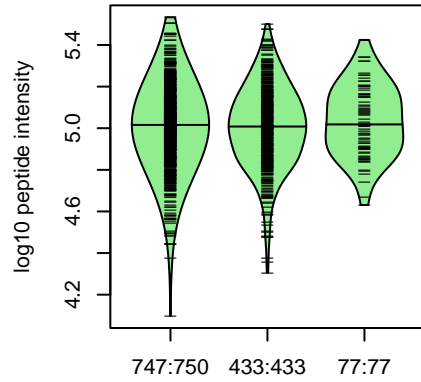

2:56096892:A:G\_G  
p = 0.48, beta = 0.0325, N = 1257

**QTSPVSAMLVLVK pc2  
Q12805**

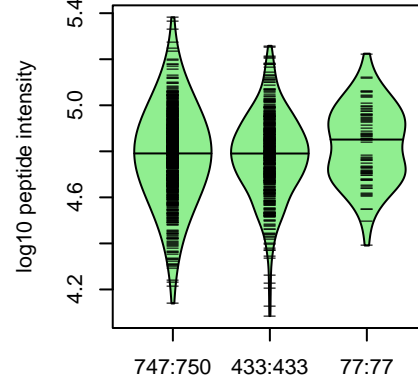

2:56096892:A:G\_G  
p = 0.14, beta = 0.0673, N = 1257

**FSCMCPQGYQVVR pc2  
Q12805**

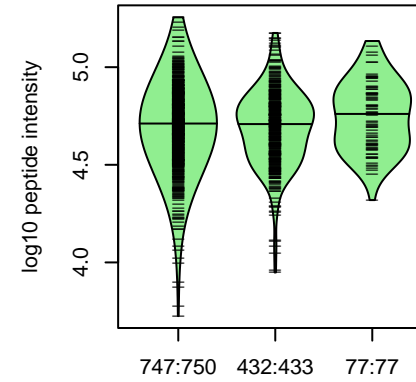

2:56096892:A:G\_G  
p = 0.2, beta = 0.059, N = 1256

**GSFACQPPGYQK pc2  
Q12805**

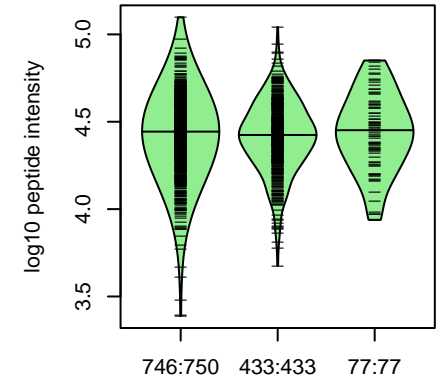

2:56096892:A:G\_G  
p = 0.79, beta = 0.0126, N = 1256

**EFEMP1 : NP5  
Q12805**

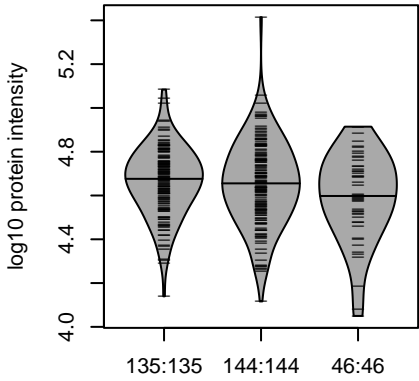

2:56096892:A:G\_G  
p = 0.42, beta = -0.0637, N = 325

**ADQVCINLR pc2  
Q12805**

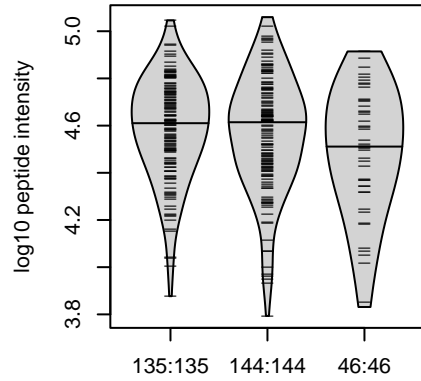

2:56096892:A:G\_G  
p = 0.25, beta = -0.0898, N = 325

**CVCPVSNAMCR pc2  
Q12805**

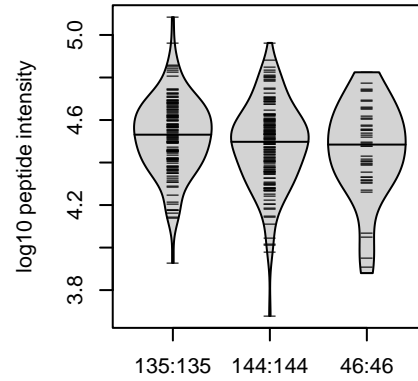

2:56096892:A:G\_G  
p = 0.39, beta = -0.068, N = 325

**FSCMCPQGYQVVR pc2  
Q12805**

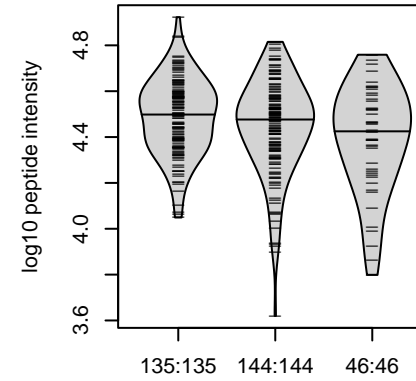

2:56096892:A:G\_G  
p = 0.16, beta = -0.111, N = 325

**GSFACQPPGYQK pc2  
Q12805**

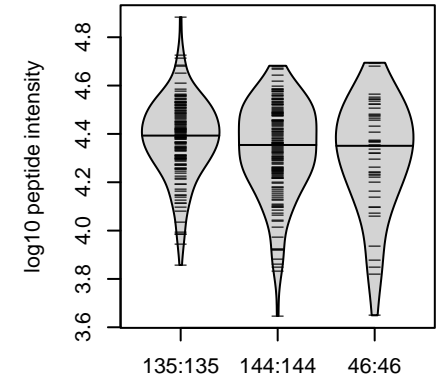

2:56096892:A:G\_G  
p = 0.26, beta = -0.0892, N = 325

Assay Target: EFEMP1  
Olink UniProt: Q12805  
UKB rsID: rs3791679  
Proxy rsID: rs3791679  
UKB SNP: 2:56096892:A:G  
Proxy SNP: 2:56096892:A:G  
UKB log10(p): 208.1  
UKB BETA: 0.205  
-----  
1257:1257:1256:1256:1256:125



**GSTP1 : NP1**  
**P09211**

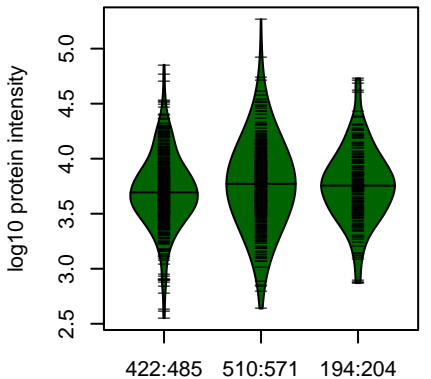

11:67352256:C:A\_A  
p = 0.0088, beta = 0.109, N = 1126

**MLLADQGQSWK pc2**  
**A8MX94;P09211**

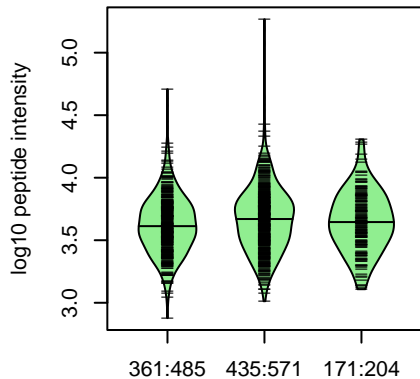

11:67352256:C:A\_A  
p = 0.024, beta = 0.101, N = 967

**PFETLLSQNQGGK pc2**  
**P09211**

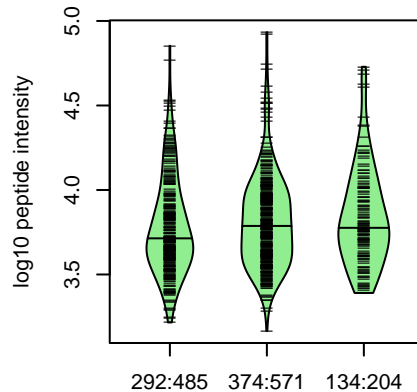

11:67352256:C:A\_A  
p = 0.071, beta = 0.0904, N = 800

**EEVVTVETWQEGSLK pc2**  
**A8MX94;P09211**

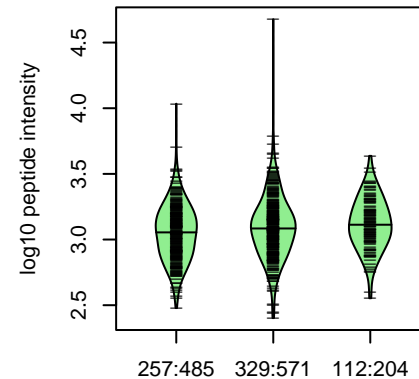

11:67352256:C:A\_A  
p = 0.0014, beta = 0.171, N = 698

**ASCLYGLPK pc2**  
**A8MX94;P09211**

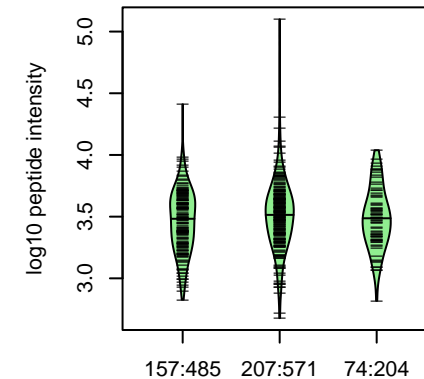

11:67352256:C:A\_A  
p = 0.38, beta = 0.0588, N = 438

**GSTP1 : NP1**  
**P09211**

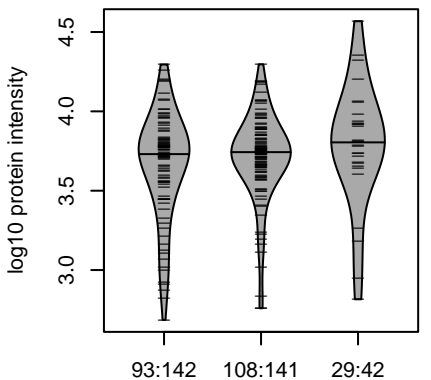

11:67352256:C:A\_A  
p = 0.088, beta = 0.164, N = 230

**PFETLLSQNQGGK pc2**  
**P09211**

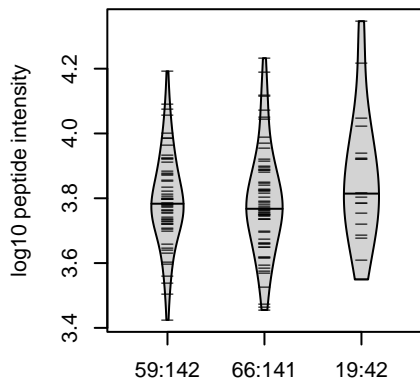

11:67352256:C:A\_A  
p = 0.62, beta = 0.0599, N = 144

**EEVVTVETWQEGSLK pc2**  
**A8MX94;P09211**

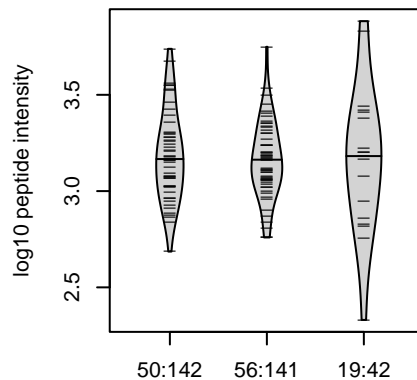

11:67352256:C:A\_A  
p = 0.85, beta = -0.023, N = 125

**MLLADQGQSWK pc2**  
**A8MX94;P09211**

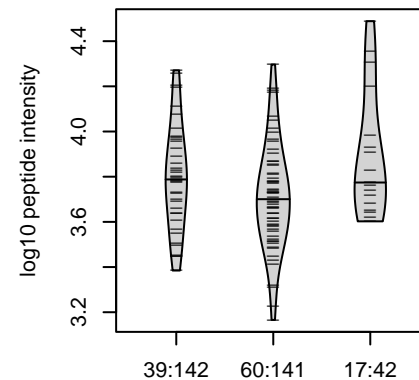

11:67352256:C:A\_A  
p = 0.62, beta = 0.0663, N = 116

**PPYTVVYFPVR pc2**  
**A0A2R8Y5E5;A8MX94;P09211**

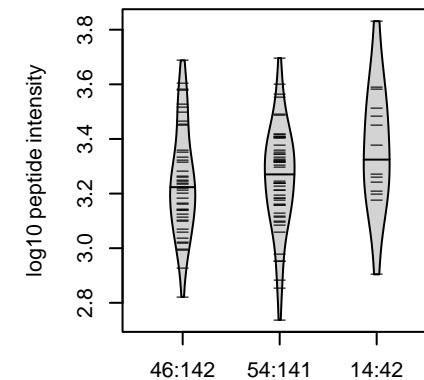

11:67352256:C:A\_A  
p = 0.089, beta = 0.23, N = 114

Assay Target: GSTP1  
Olink UniProt: P09211  
UKB rsID: rs762803  
Proxy rsID: rs762803  
UKB SNP: 11:67352256:C:A  
Proxy SNP: 11:67352256:C:A  
UKB log10(p): 205.9  
UKB BETA: 0.196  
- - - \* - - - \* - - - \* - - - :NA  
967:800:698:438:354:323:269:1

**YVSLIYTNYEAGK pc2**  
**rs1695 ALT**

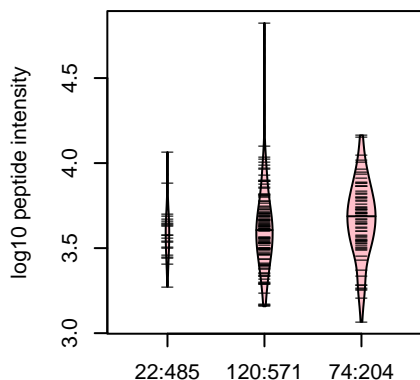

11:67352256:C:A\_A  
p = 7.5e-24, model = REC, N = 216

**YISLIYTNYEAGK pc2**  
**rs1695 REF**

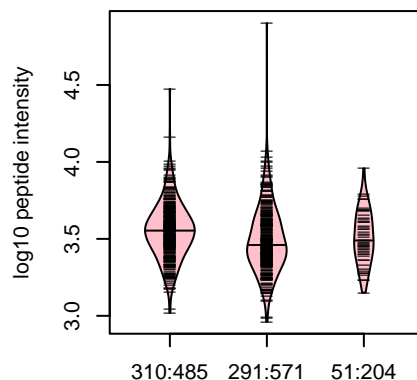

11:67352256:C:A\_A  
p = 3.2e-17, model = DOM, N = 652

**YISLIYTNYEAGKDDYVK pc3**  
**rs1695 REF**

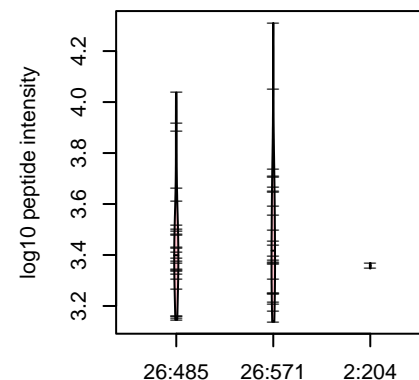

11:67352256:C:A\_A  
p = 0.0073, model = DOM, N = 54

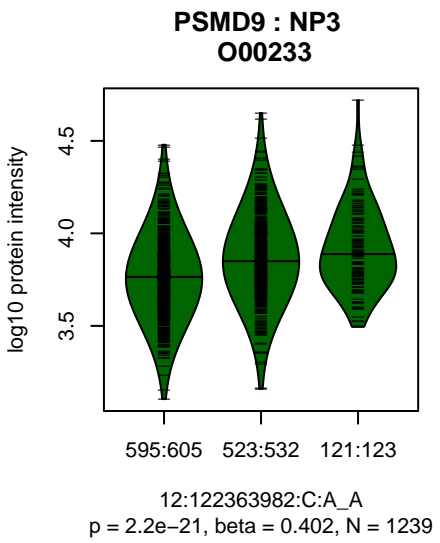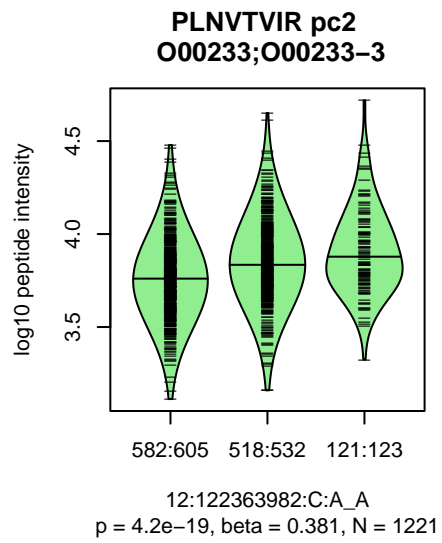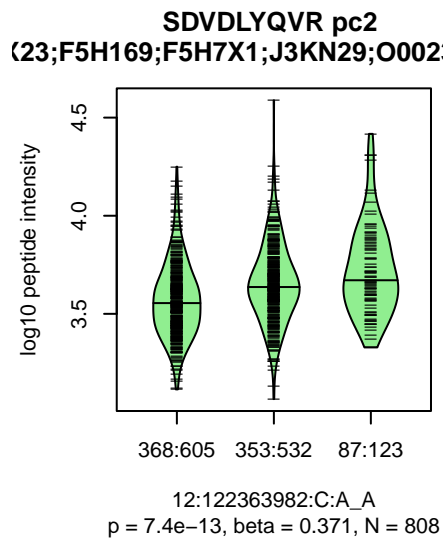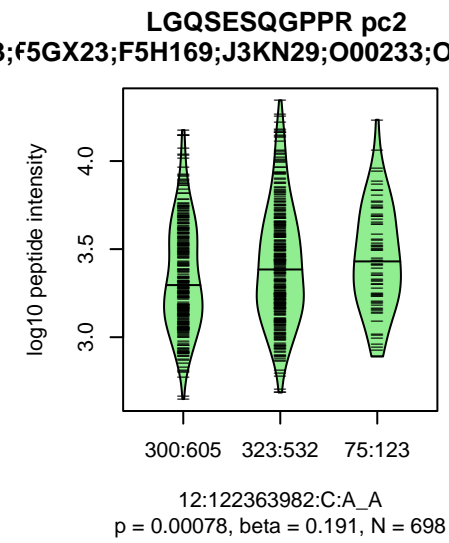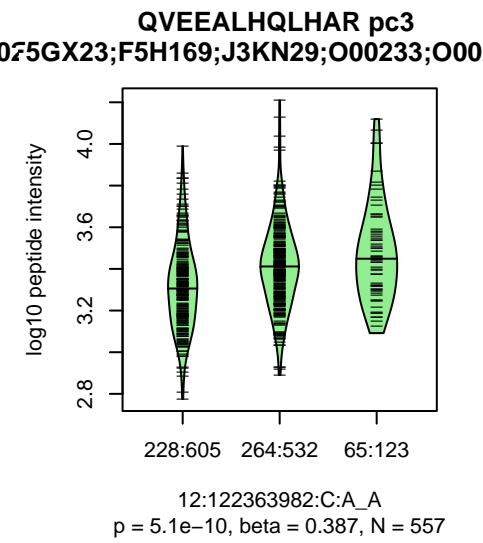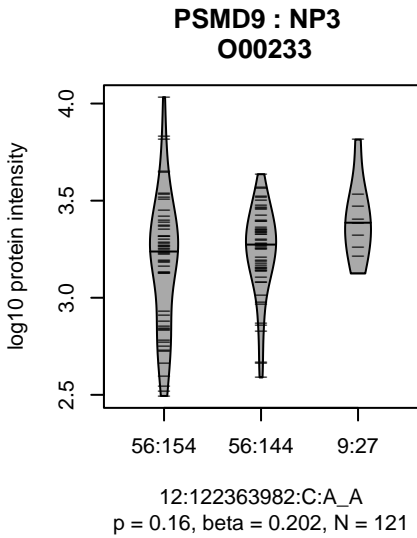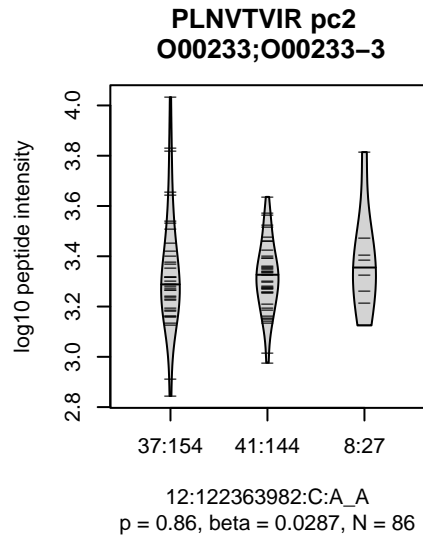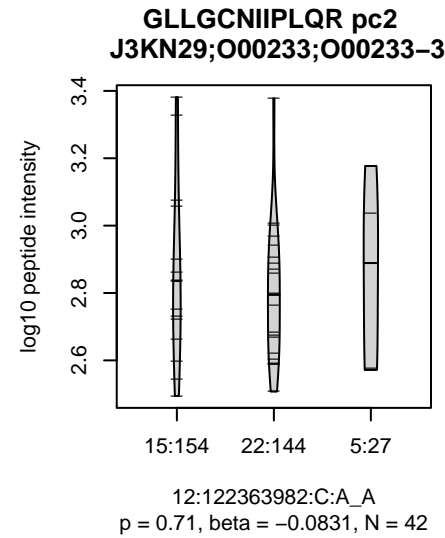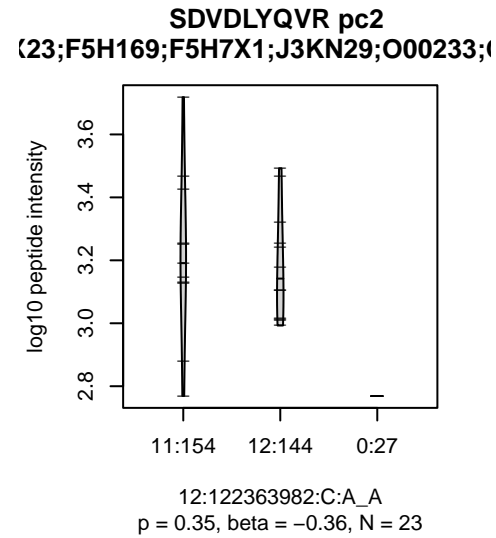

Assay Target: PSMD9  
 Olink UniProt: O00233  
 UKB rsID: rs1720066  
 Proxy rsID: rs1720066  
 UKB SNP: 12:122363982:C:A  
 Proxy SNP: 12:122363982:C:A  
 UKB log10(p): 203.8  
 UKB BETA: -0.199  
 \*\*:\*:\*:\*:-\*:-:NA:NA:NA  
 1221:808:698:557:483:419:371:



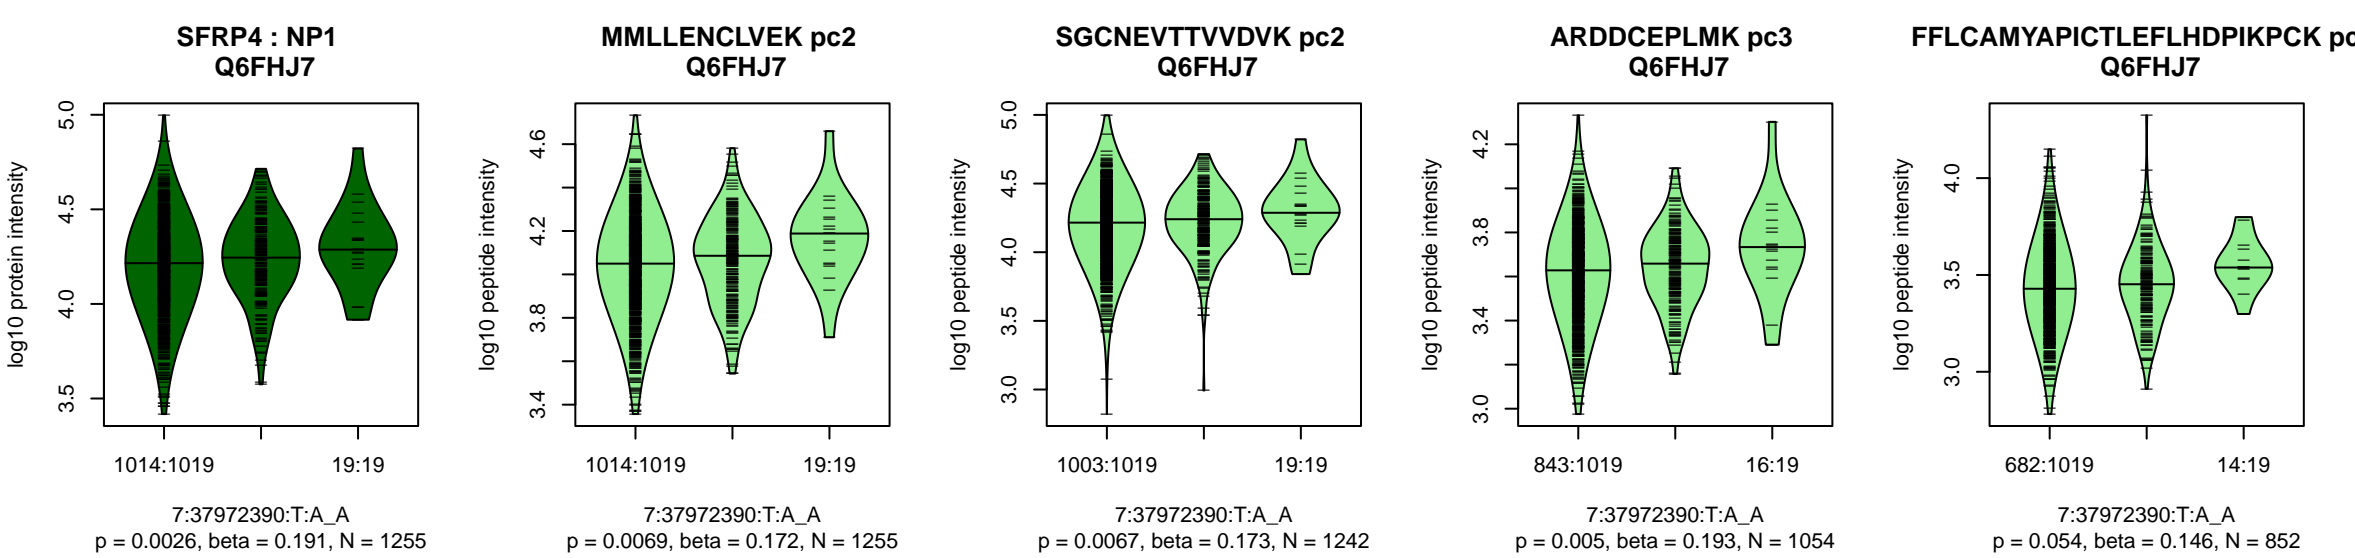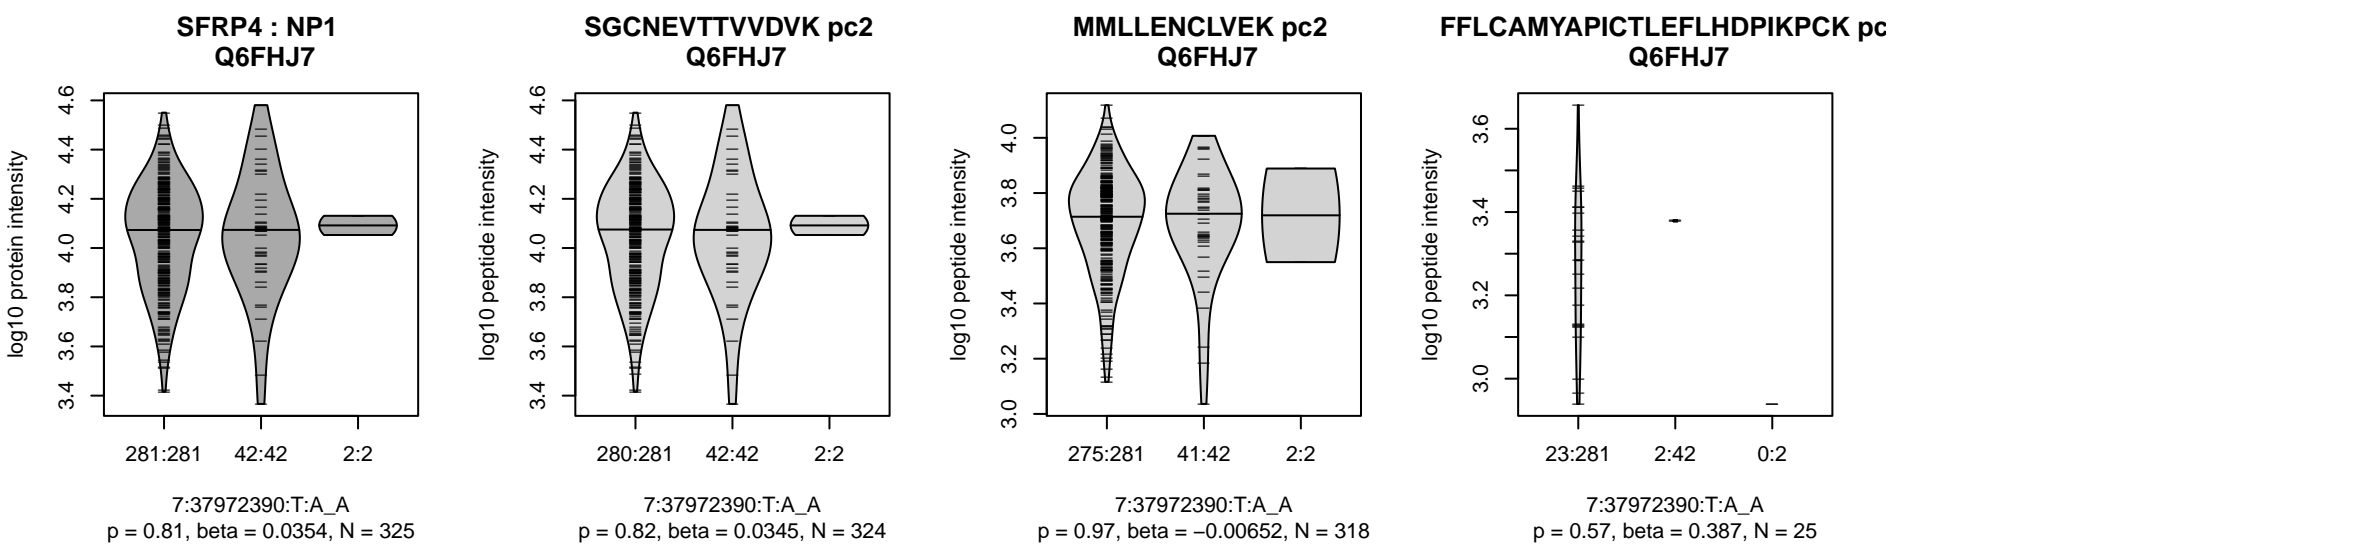

Assay Target: SFRP4  
 Olink UniProt: Q6FHJ7  
 UKB rsID: rs75207237  
 Proxy rsID: rs75207237  
 UKB SNP: 7:37972390:T:A  
 Proxy SNP: 7:37972390:T:A  
 UKB log10(p): 201  
 UKB BETA: 0.28  
 \*\*:\*:-:-:-NA  
 1255:1242:1054:852:662:103:17

**CCL5 : NP4  
P13501**

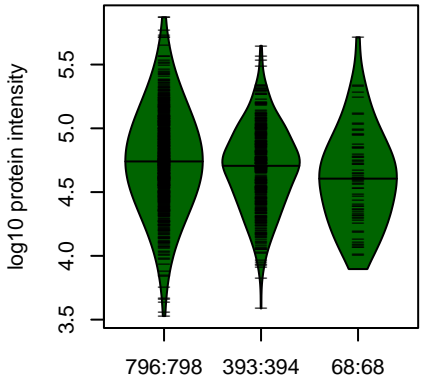

17:34207780:C:T\_T  
p = 2.6e-05, beta = -0.199, N = 1257

**CSNPAVVFVTR pc2  
P13501**

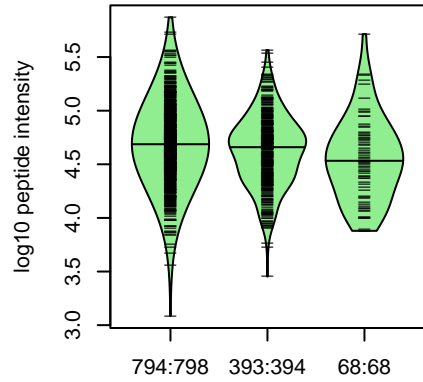

17:34207780:C:T\_T  
p = 5.6e-05, beta = -0.19, N = 1255

**QVCANPEK pc2  
P13501**

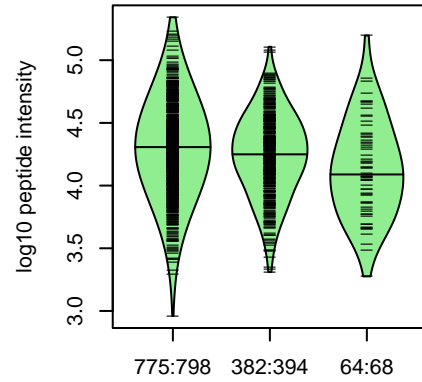

17:34207780:C:T\_T  
p = 6e-05, beta = -0.193, N = 1221

**EYFYTS GK pc2  
A0A494C1Q1;P13501**

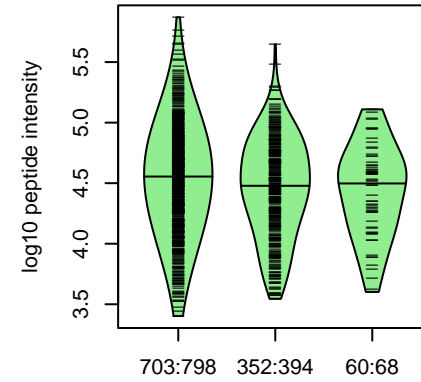

17:34207780:C:T\_T  
p = 0.0018, beta = -0.157, N = 1115

**CCL5 : NP4  
P13501**

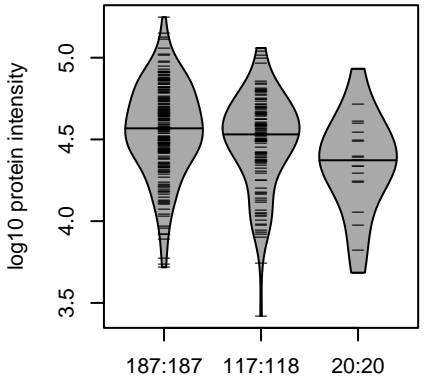

17:34207780:C:T\_T  
p = 0.0017, beta = -0.279, N = 324

**CSNPAVVFVTR pc2  
P13501**

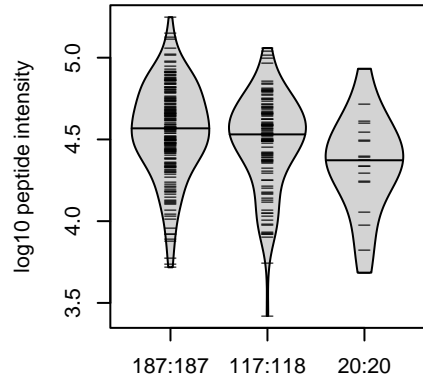

17:34207780:C:T\_T  
p = 0.0019, beta = -0.277, N = 324

**EYFYTS GK pc2  
A0A494C1Q1;P13501**

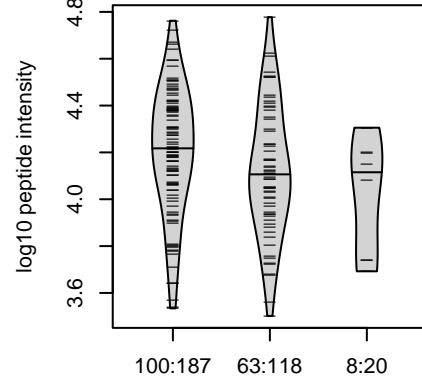

17:34207780:C:T\_T  
p = 0.0052, beta = -0.354, N = 171

**QVCANPEK pc2  
P13501**

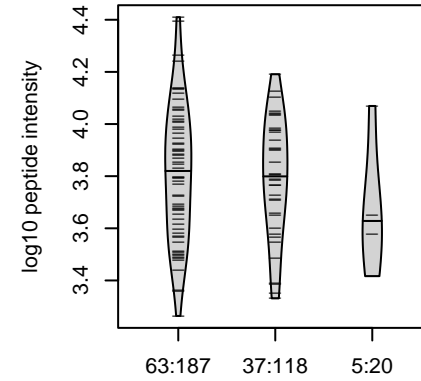

17:34207780:C:T\_T  
p = 0.3, beta = -0.167, N = 105

Assay Target: CCL5  
Olink UniProt: P13501  
UKB rsID: rs2107538  
Proxy rsID: rs2107538  
UKB SNP: 17:34207780:C:T  
Proxy SNP: 17:34207780:C:T  
UKB log10(p): 196.7  
UKB BETA: -0.231  
\*\*\*  
1255:1221:1115



**PIGR : NP4**  
**P01833**

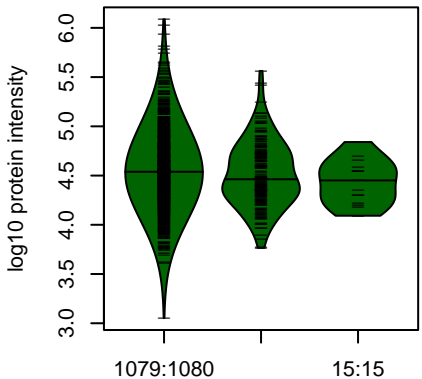

1:207107696:C:T\_T  
p = 0.96, beta = 0.0039, N = 1259

**LVSLTLNLVTR pc2**  
**P01833**

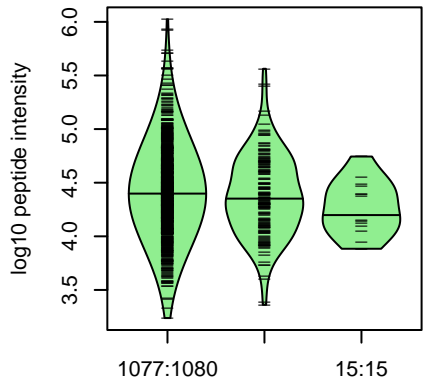

1:207107696:C:T\_T  
p = 0.92, beta = -0.00753, N = 1257

**ADEGWYWCGVK pc2**  
**P01833**

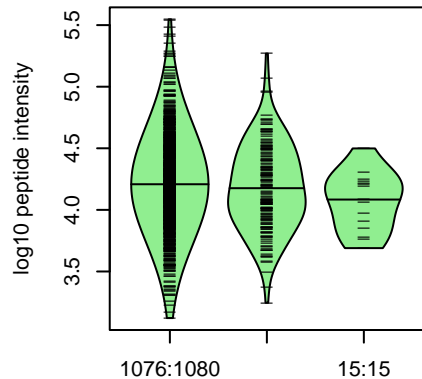

1:207107696:C:T\_T  
p = 0.76, beta = -0.0215, N = 1256

**CPLLVDSEGWVK pc2**  
**P01833**

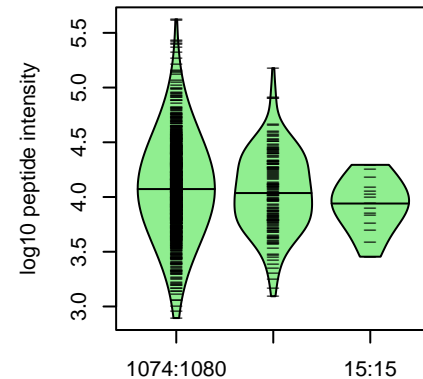

1:207107696:C:T\_T  
p = 0.89, beta = -0.00996, N = 1254

**DGSFVVITGLR pc2**  
**P01833**

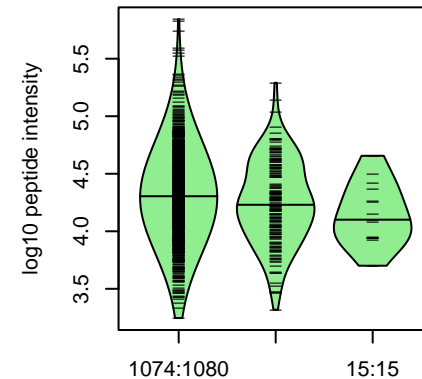

1:207107696:C:T\_T  
p = 0.48, beta = -0.0509, N = 1254

**PIGR : NP4**  
**P01833**

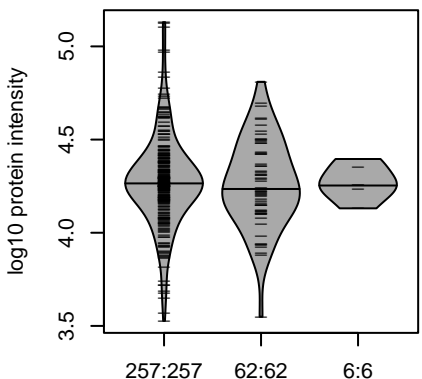

1:207107696:C:T\_T  
p = 0.64, beta = 0.0551, N = 325

**GGCITLISSEGYVSSK pc2**  
**P01833**

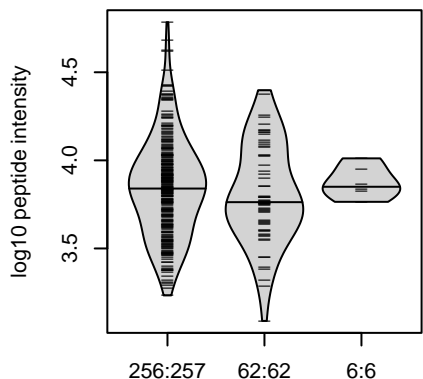

1:207107696:C:T\_T  
p = 0.94, beta = 0.00917, N = 324

**LVSLTLNLVTR pc2**  
**P01833**

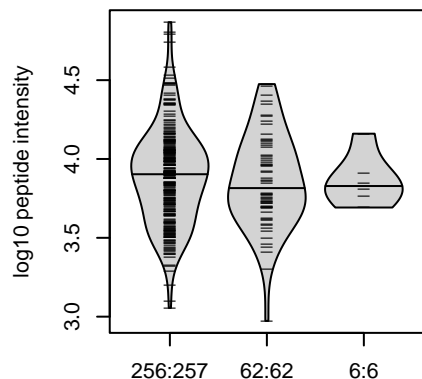

1:207107696:C:T\_T  
p = 1, beta = 0.000573, N = 324

**ADEGWYWCGVK pc2**  
**P01833**

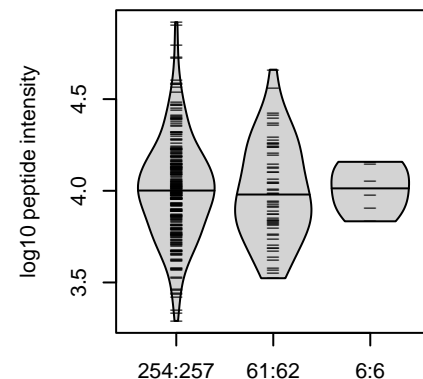

1:207107696:C:T\_T  
p = 0.91, beta = 0.0139, N = 321

**YWCLWEGAQNGR pc2**  
**P01833**

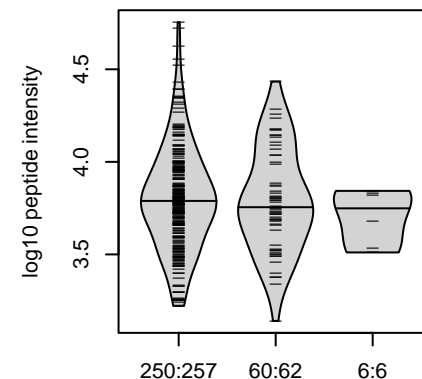

1:207107696:C:T\_T  
p = 0.8, beta = -0.0298, N = 316

**ADAAPDEK pc2**  
**rs291102 REF**

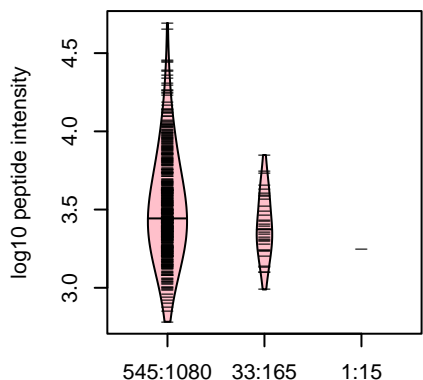

1:207107696:C:T\_T  
p = 5.3e-16, model = REC, N = 579

**GVAGSSVAVLCPYNR pc2**  
**rs2275531 ALT**

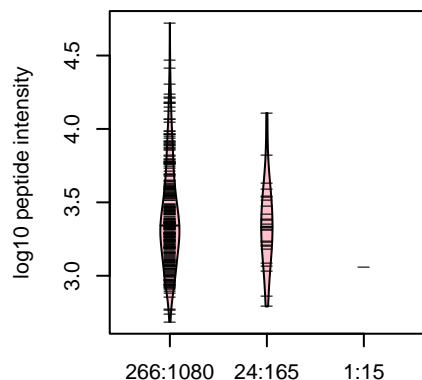

1:207107696:C:T\_T  
p = 0.0011, model = REC, N = 291

**GVAGSSVAVLCPYNR pc2**  
**rs2275531 REF**

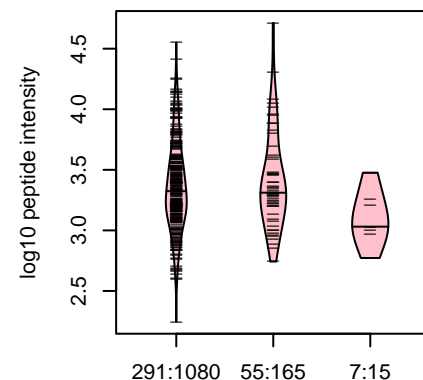

1:207107696:C:T\_T  
p = 0.04, model = REC, N = 353

Assay Target: PIGR  
Olink UniProt: P01833  
UKB rsID: rs291103  
Proxy rsID: rs908701  
UKB SNP: 1:207107079:G:A  
Proxy SNP: 1:207107696:C:T  
UKB log10(p): 191.4  
UKB BETA: -0.519  
-----  
1257:1256:1254:1254:1254:123

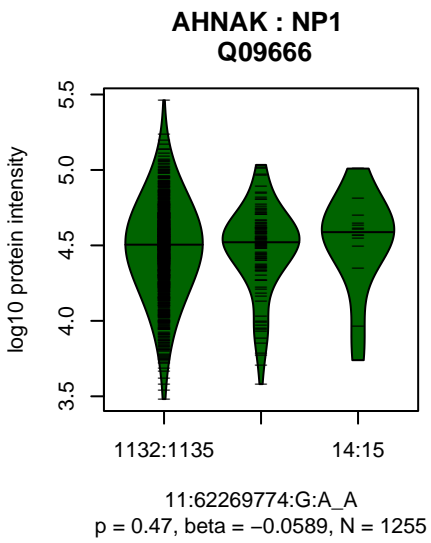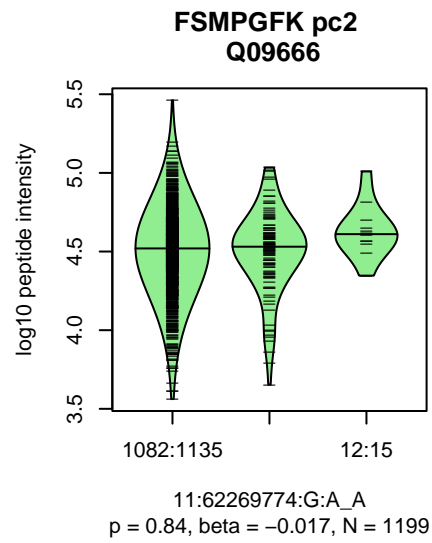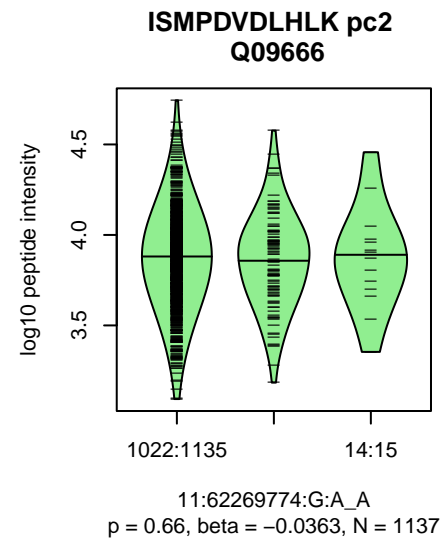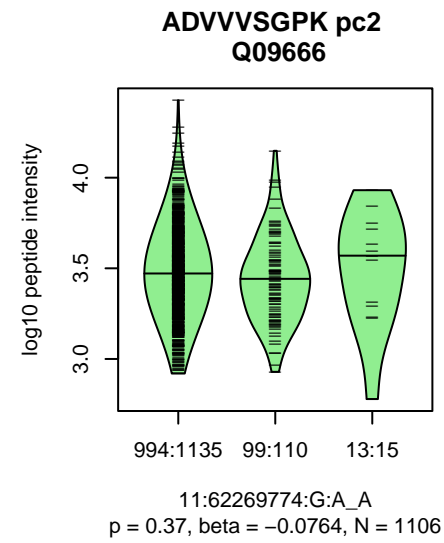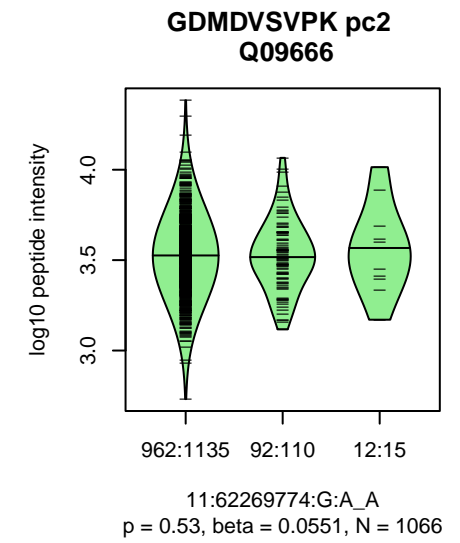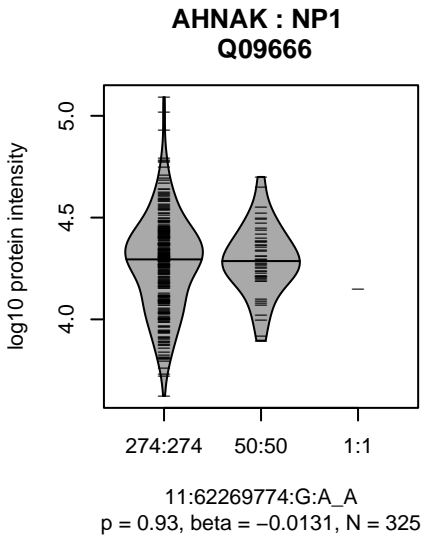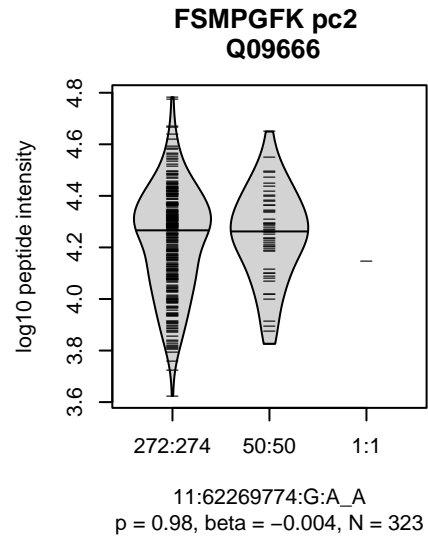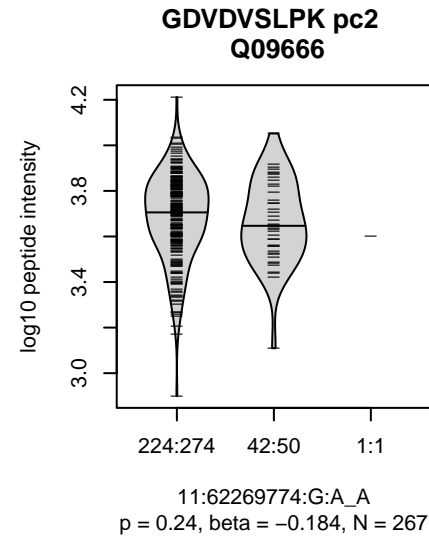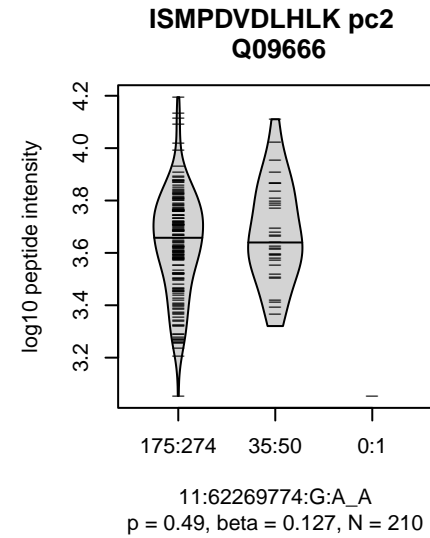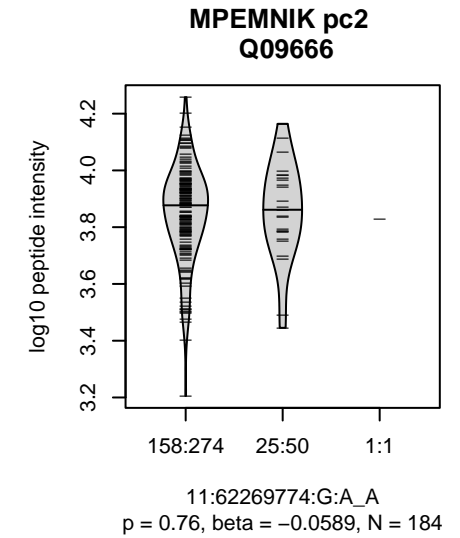

Assay Target: AHNAK  
 Olink UniProt: Q09666  
 UKB rsID: rs145590149  
 Proxy rsID: rs11231121  
 UKB SNP: 11:62303555:T:TCTC  
 Proxy SNP: 11:62269774:G:A  
 UKB log10(p): 189.7  
 UKB BETA: -0.496  
 -----  
 1199:1137:1106:1066:1008:100

**COL4A1 : NP3  
P02462**

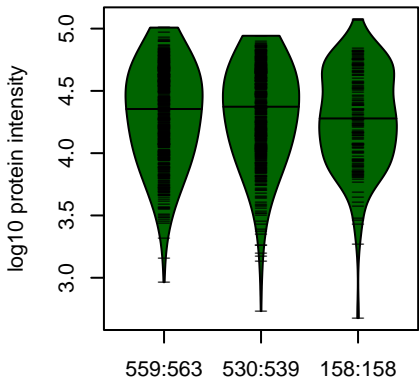

13:110818598:T:G\_G  
p = 0.61, beta = -0.0208, N = 1247

**ILYHGYSLLYVQGNR pc3  
P02462**

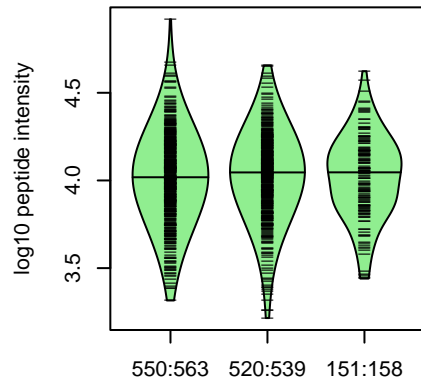

13:110818598:T:G\_G  
p = 0.75, beta = 0.0134, N = 1221

**HSQTIDDPQCPSGTK pc3  
P02462**

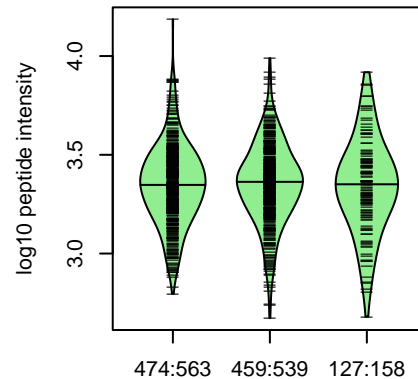

13:110818598:T:G\_G  
p = 0.9, beta = 0.00593, N = 1060

**AHGQDLGTAGSCLR pc3  
P02462;P29400;P29400-2**

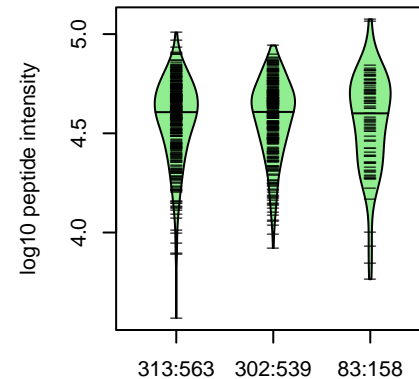

13:110818598:T:G\_G  
p = 0.63, beta = -0.0265, N = 698

**SAPFIECHGR pc2  
P02462;P29400;P29400-2**

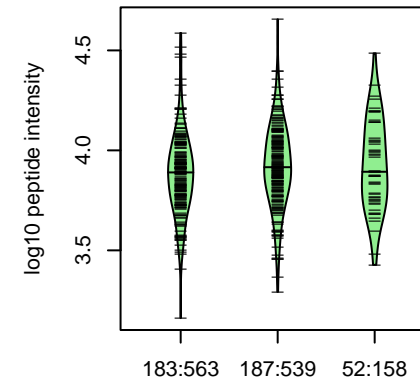

13:110818598:T:G\_G  
p = 0.22, beta = 0.087, N = 422

**COL4A1 : NP3  
P02462**

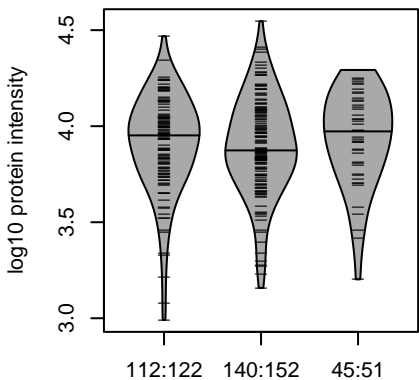

13:110818598:T:G\_G  
p = 0.91, beta = 0.00984, N = 297

**ILYHGYSLLYVQGNR pc3  
P02462**

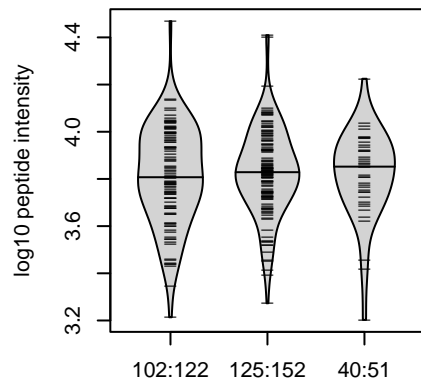

13:110818598:T:G\_G  
p = 0.78, beta = -0.0247, N = 267

**SAPFIECHGR pc2  
P02462;P29400;P29400-2**

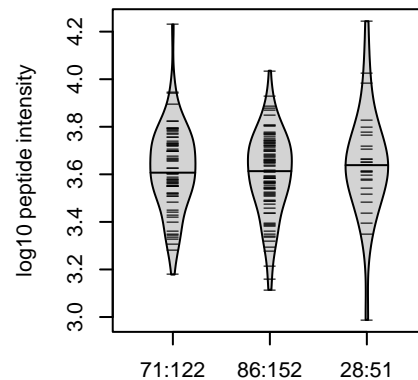

13:110818598:T:G\_G  
p = 0.64, beta = -0.0483, N = 185

**HSQTIDDPQCPSGTK pc3  
P02462**

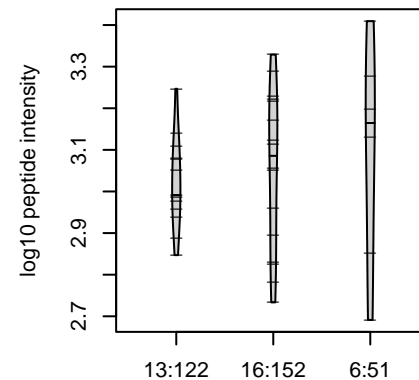

13:110818598:T:G\_G  
p = 0.42, beta = 0.18, N = 35

**AHGQDLGTAGSCLR pc2  
P02462;P29400;P29400-2**

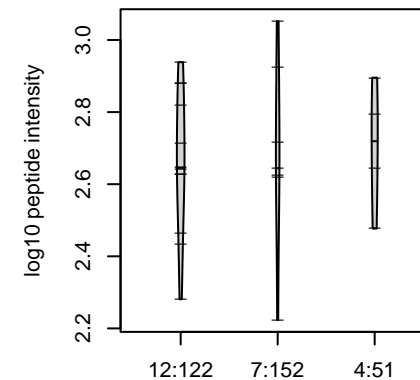

13:110818598:T:G\_G  
p = 0.55, beta = 0.152, N = 23

Assay Target: COL4A1  
Olink UniProt: P02462  
UKB rsID: rs3742207  
Proxy rsID: rs3742207  
UKB SNP: 13:110818598:T:G  
Proxy SNP: 13:110818598:T:G  
UKB log10(p): 186.6  
UKB BETA: -0.184  
-:-:-:-:-:NA:NA  
1221:1060:698:422:283:130:2:1

**CSF1 : NP2  
P09603**

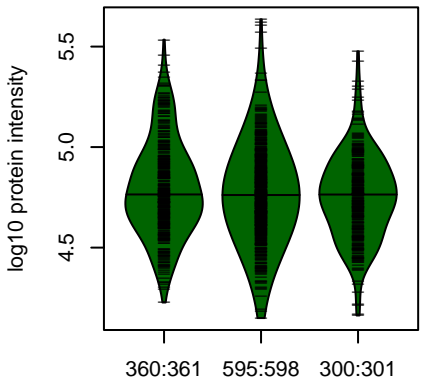

1:110503078:T:C\_C  
 $p = 0.046$ ,  $\beta = -0.0774$ ,  $N = 1255$

**TFYETPLQLLEK pc2  
P09603;P09603-2;P09603-3**

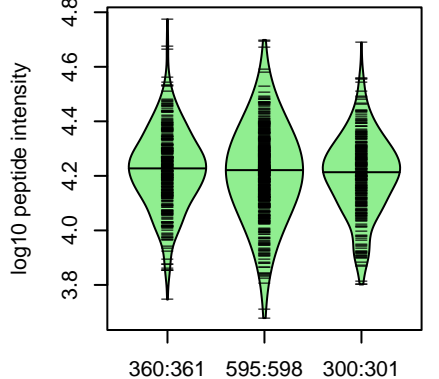

1:110503078:T:C\_C  
 $p = 0.11$ ,  $\beta = -0.0623$ ,  $N = 1255$

**TDHPSALLRDPPEPGSPR pc4  
P09603**

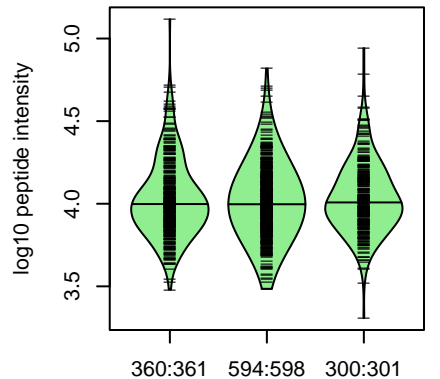

1:110503078:T:C\_C  
 $p = 0.46$ ,  $\beta = 0.0285$ ,  $N = 1254$

**AFLLVQDIMEDTMR pc2  
P09603;P09603-2;P09603-3**

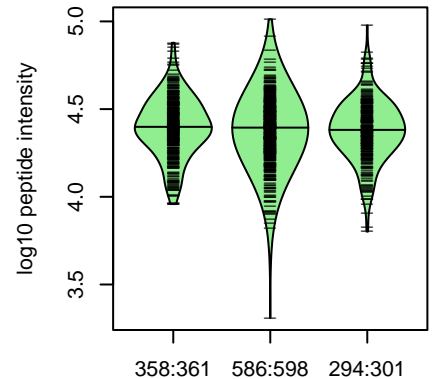

1:110503078:T:C\_C  
 $p = 0.15$ ,  $\beta = -0.0568$ ,  $N = 1238$

**SHSSGSVLPGLGELEGR pc3  
P09603**

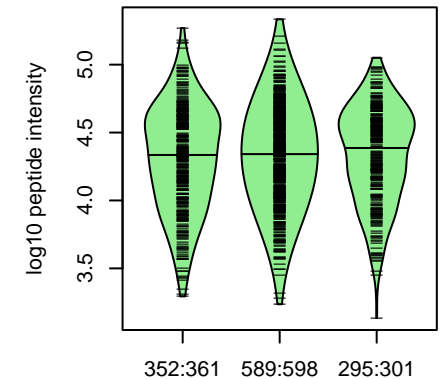

1:110503078:T:C\_C  
 $p = 0.42$ ,  $\beta = 0.0317$ ,  $N = 1236$

**CSF1 : NP2  
P09603**

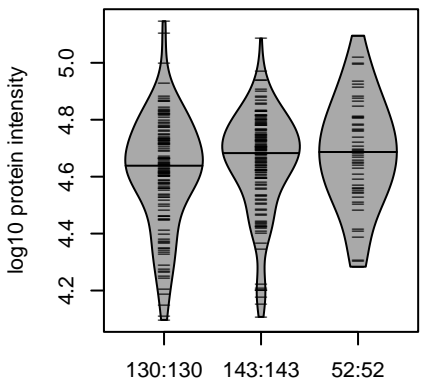

1:110503078:T:C\_C  
 $p = 0.2$ ,  $\beta = 0.0987$ ,  $N = 325$

**TFYETPLQLLEK pc2  
P09603;P09603-2;P09603-3**

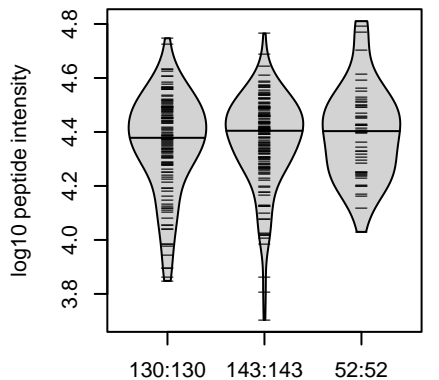

1:110503078:T:C\_C  
 $p = 0.85$ ,  $\beta = 0.0143$ ,  $N = 325$

**AFLLVQDIMEDTMR pc2  
P09603;P09603-2;P09603-3**

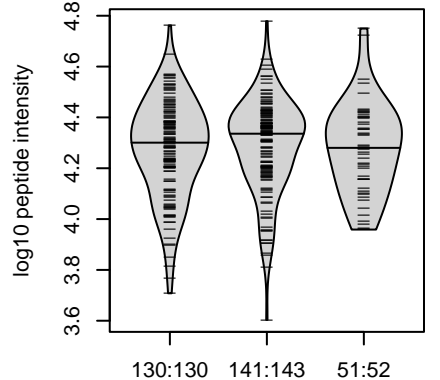

1:110503078:T:C\_C  
 $p = 0.47$ ,  $\beta = -0.0562$ ,  $N = 322$

**DWNIFSK pc2  
P09603;P09603-2;P09603-3**

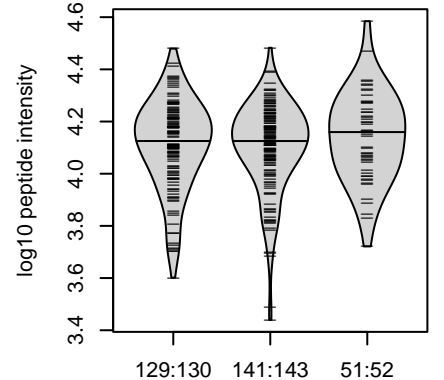

1:110503078:T:C\_C  
 $p = 0.99$ ,  $\beta = 0.000833$ ,  $N = 321$

**SHSSGSVLPGLGELEGR pc3  
P09603**

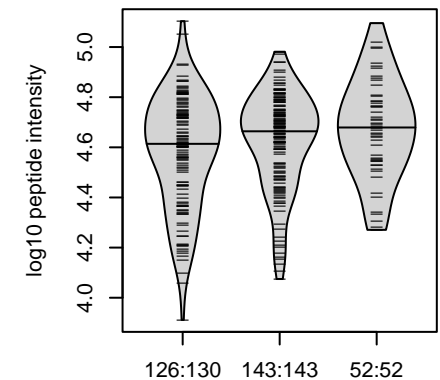

1:110503078:T:C\_C  
 $p = 0.11$ ,  $\beta = 0.123$ ,  $N = 321$

Assay Target: CSF1  
Olink UniProt: P09603  
UKB rsID: rs2225767  
Proxy rsID: rs2225767  
UKB SNP: 1:110503078:T:C  
Proxy SNP: 1:110503078:T:C  
UKB log10(p): 186.2  
UKB BETA: -0.177  
-----\*-----  
1255:1254:1238:1236:1219:119

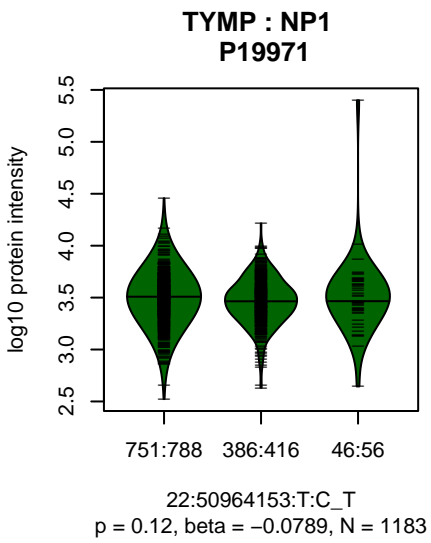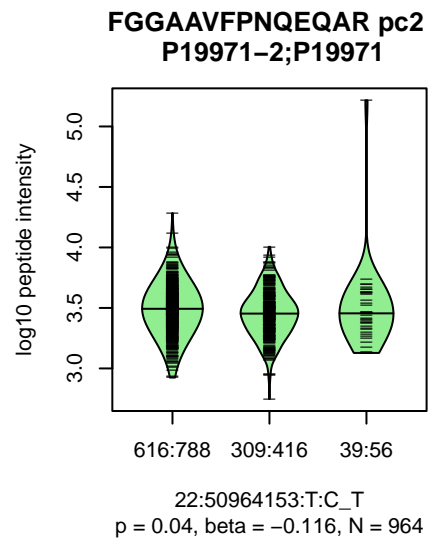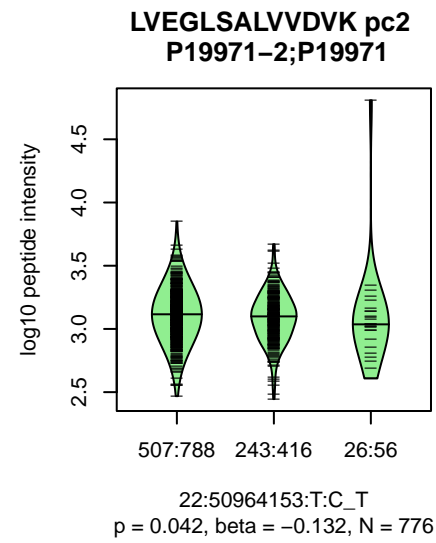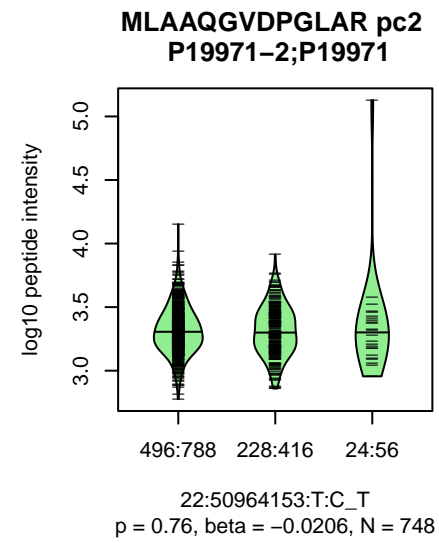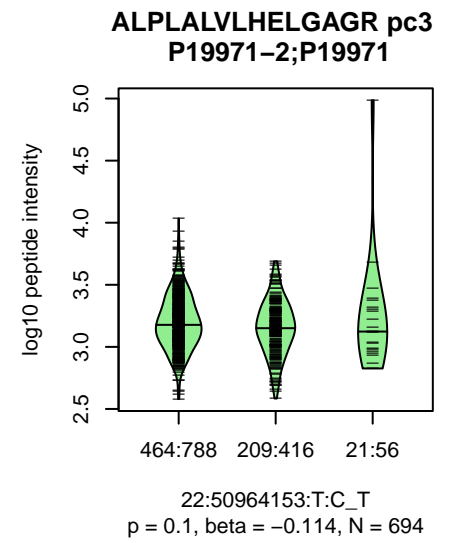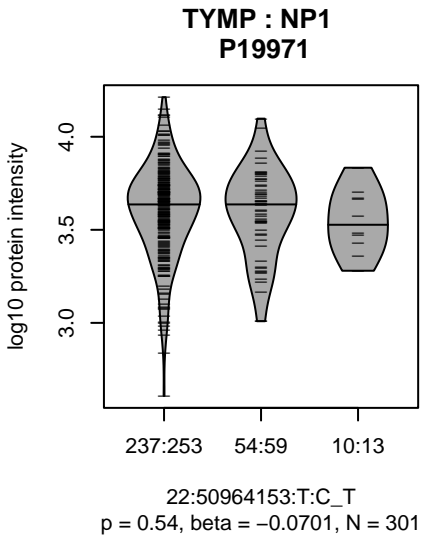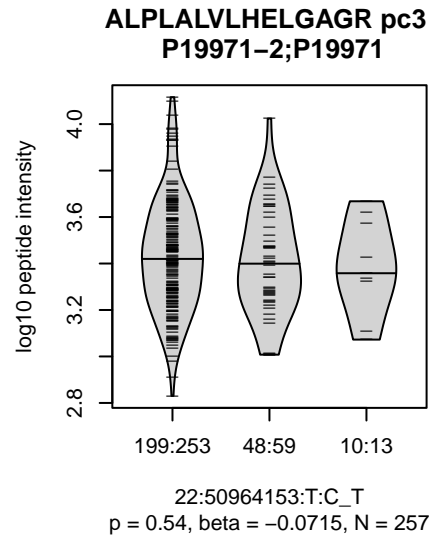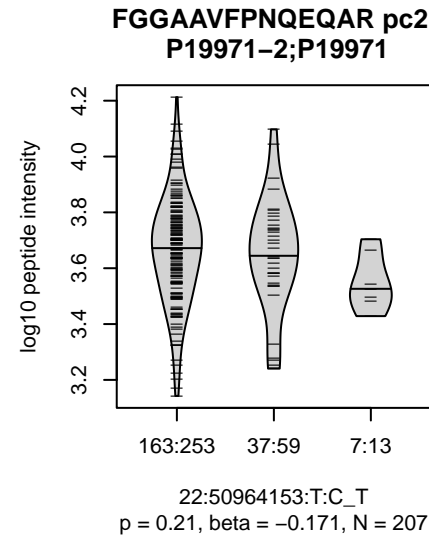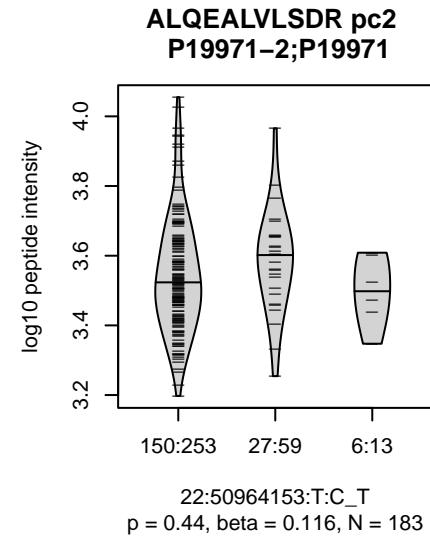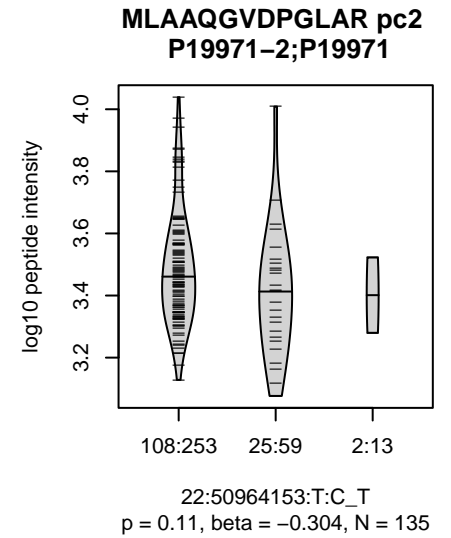

Assay Target: TYMP  
 Olink UniProt: P19971  
 UKB rsID: rs131805  
 Proxy rsID: rs131805  
 UKB SNP: 22:50964153:T:C  
 Proxy SNP: 22:50964153:T:C  
 UKB log10(p): 185.4  
 UKB BETA: 0.22  
 -----NA  
 964:776:748:694:601:521:495:4



**CXCL12 : NP4**  
**P48061-4**

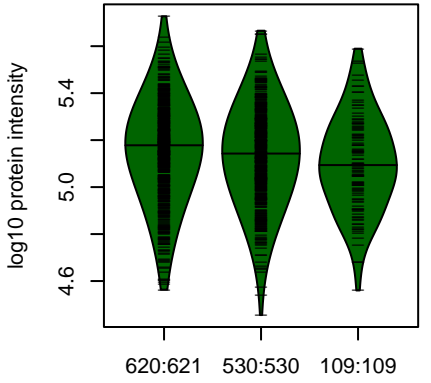

10:44883165:C:T\_T  
p = 0.015, beta = -0.106, N = 1259

**ILNTPNCALQIVAR pc2**  
**P48061;P48061-2;P48061-3;P48061**

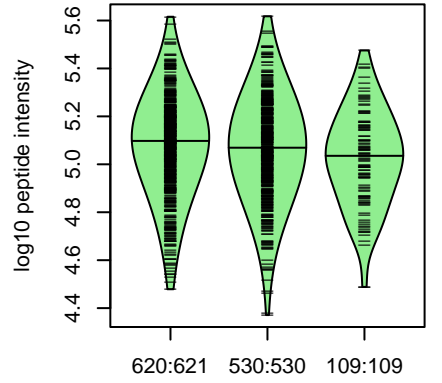

10:44883165:C:T\_T  
p = 0.034, beta = -0.0925, N = 1259

**WIQEYLEK pc2**

**P48061;P48061-2;P48061-3;P48061**

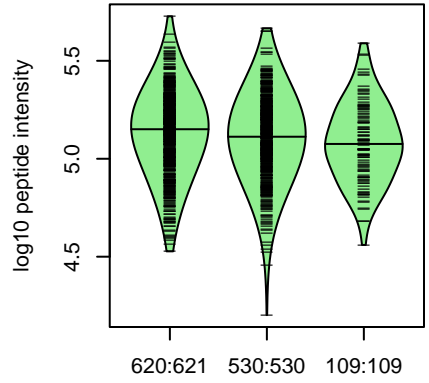

10:44883165:C:T\_T  
p = 0.013, beta = -0.108, N = 1259

**FFESHVAR pc2**

**P48061;P48061-2;P48061-3;P48061**

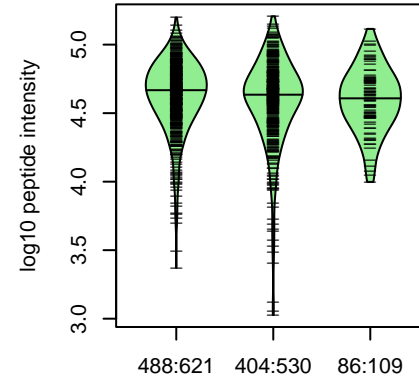

10:44883165:C:T\_T  
p = 0.075, beta = -0.0877, N = 978

**QVCIDPK pc2**

**P48061;P48061-2;P48061-3;P48061**

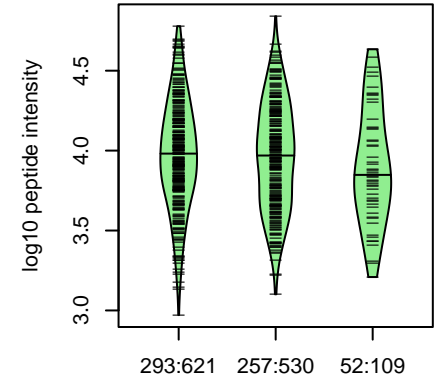

10:44883165:C:T\_T  
p = 0.28, beta = -0.0677, N = 602

**CXCL12 : NP4**

**P48061;P48061-2;P48061-3;P48061**

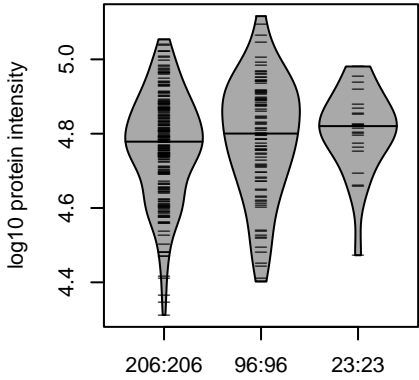

10:44883165:C:T\_T  
p = 0.069, beta = 0.16, N = 325

**ILNTPNCALQIVAR pc2**

**P48061;P48061-2;P48061-3;P48061**

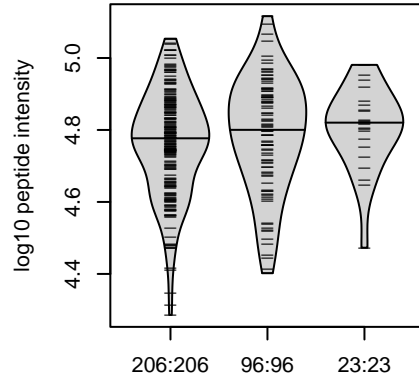

10:44883165:C:T\_T  
p = 0.068, beta = 0.16, N = 325

**WIQEYLEK pc2**

**P48061;P48061-2;P48061-3;P48061**

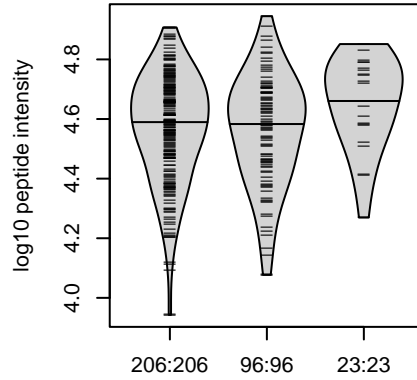

10:44883165:C:T\_T  
p = 0.2, beta = 0.112, N = 325

**FFESHVAR pc2**

**P48061;P48061-2;P48061-3;P48061**

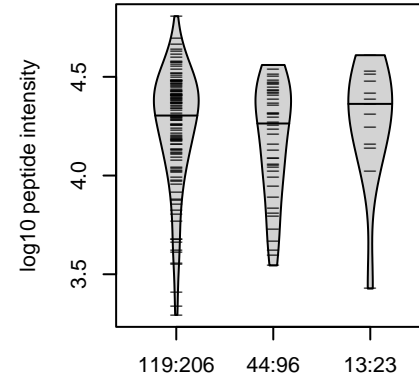

10:44883165:C:T\_T  
p = 0.75, beta = -0.0375, N = 176

**QVCIDPK pc2**

**P48061;P48061-2;P48061-3;P48061**

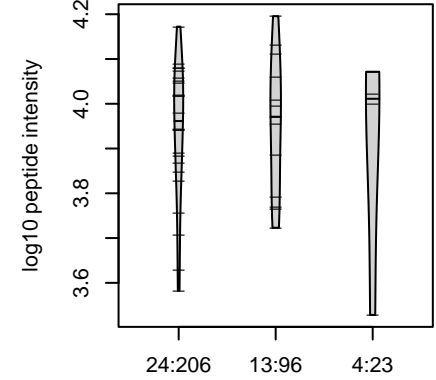

10:44883165:C:T\_T  
p = 0.98, beta = 0.0056, N = 41

Assay Target: CXCL12  
Olink UniProt: P48061  
UKB rsID: rs11239028  
Proxy rsID: rs11239028  
UKB SNP: 10:44883165:C:T  
Proxy SNP: 10:44883165:C:T  
UKB log10(p): 184.6  
UKB BETA: 0.191  
-:-:-  
1259:1259:978:602

**CHGA : NP2**  
**P10645**

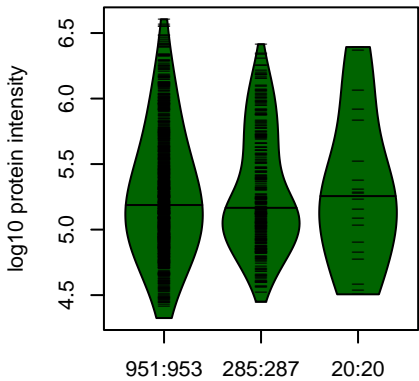

14:93399101:C:T\_T  
p = 0.37, beta = 0.0533, N = 1256

**GLSAEPGWQAK pc2**  
**P10645**

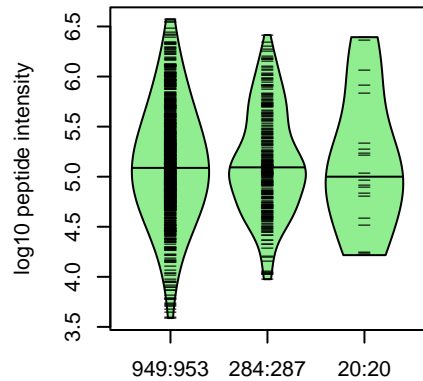

14:93399101:C:T\_T  
p = 0.61, beta = 0.0299, N = 1253

**CIVEVISDTLSK pc2**  
**G5E968;P10645**

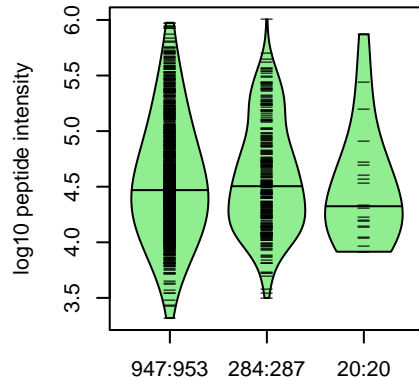

14:93399101:C:T\_T  
p = 0.45, beta = 0.0453, N = 1251

**YGPQAEGDSEGLSQGLVDR pc3**  
**P10645**

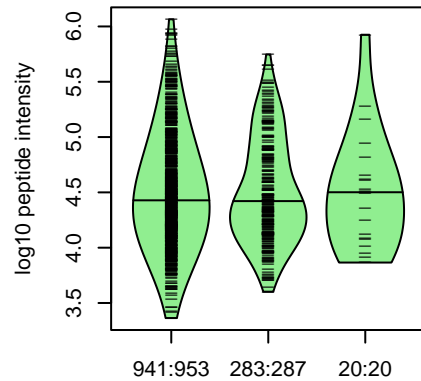

14:93399101:C:T\_T  
p = 0.42, beta = 0.0478, N = 1244

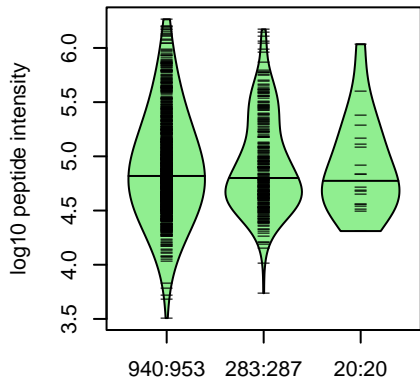

14:93399101:C:T\_T  
p = 0.41, beta = 0.0489, N = 1243

**CHGA : NP2**  
**P10645**

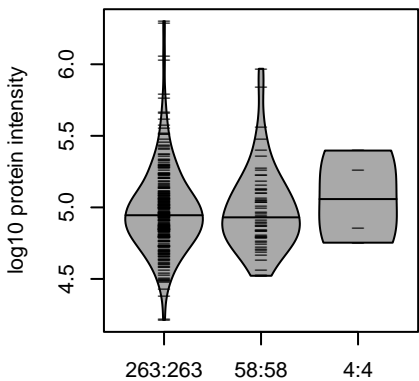

14:93399101:C:T\_T  
p = 0.66, beta = -0.0555, N = 325

**CIVEVISDTLSK pc2**  
**G5E968;P10645**

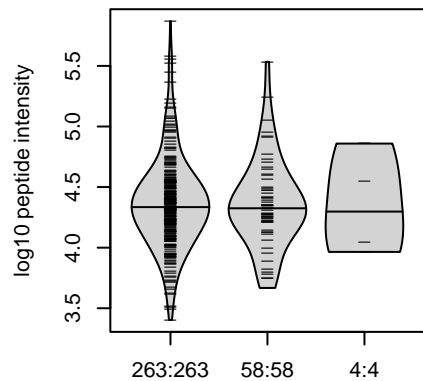

14:93399101:C:T\_T  
p = 0.32, beta = -0.125, N = 325

**EEEEEMAVVPQGLFR pc3**  
**G5E968;P10645**

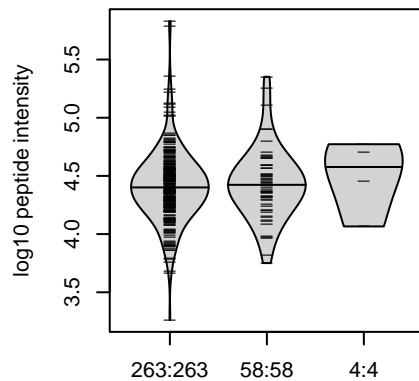

14:93399101:C:T\_T  
p = 0.79, beta = 0.0338, N = 325

**ELQDLALQGAK pc2**  
**G5E968;P10645**

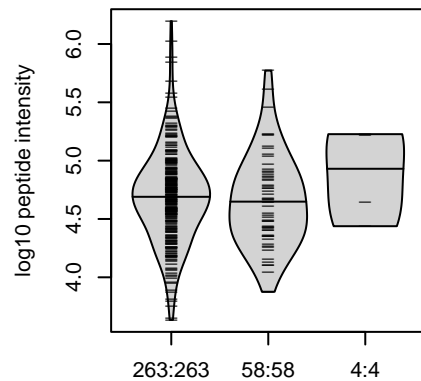

14:93399101:C:T\_T  
p = 0.72, beta = -0.0448, N = 325

**GEQEHSQQKEEEEEEMAVVPQGLFR pc3**  
**G5E968;P10645**

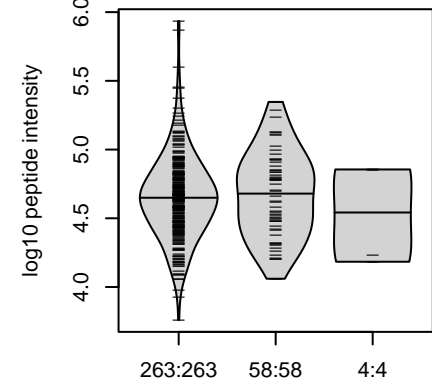

14:93399101:C:T\_T  
p = 0.55, beta = -0.0759, N = 325

Assay Target: CHGA  
Olink UniProt: P10645  
UKB rsID: rs729940  
Proxy rsID: rs729940  
UKB SNP: 14:93399101:C:T  
Proxy SNP: 14:93399101:C:T  
UKB log10(p): 183.9  
UKB BETA: -0.242  
-----  
1253:1251:1244:1243:1243:124

**PSSWEDSLEAGLPLQVR pc3**  
**rs729940 ALT**

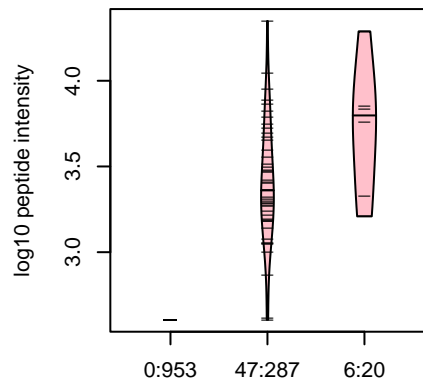

14:93399101:C:T\_T  
p = 8.1e-35, model = REC, N = 53

**EDSLEAGLPLQVR pc2**  
**rs729940 REF**

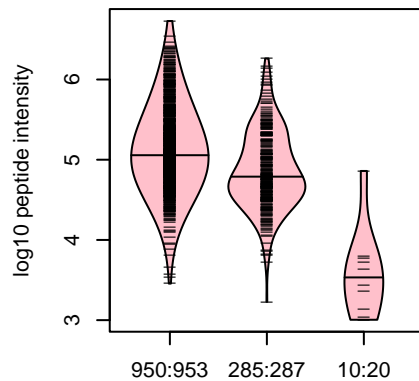

14:93399101:C:T\_T  
p = 2e-16, model = DOM, N = 1245

**EDSLEAGLPLQVR pc3**  
**rs729940 REF**

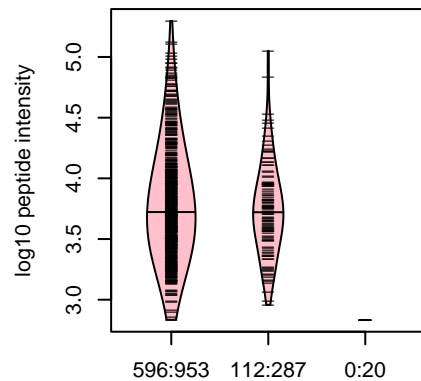

14:93399101:C:T\_T  
p = 1.8e-15, model = REC, N = 708

**PSSREDSLEAGLPLQVR pc3**  
**rs729940 REF**

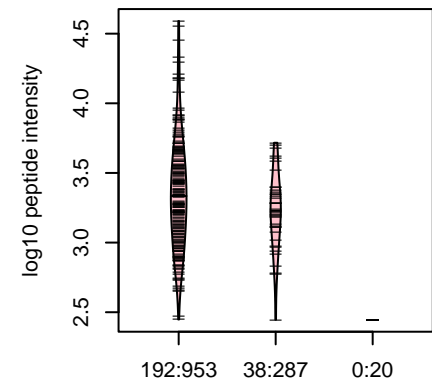

14:93399101:C:T\_T  
p = 0.0022, model = REC, N = 230



**S100A4 : NP2  
P26447**

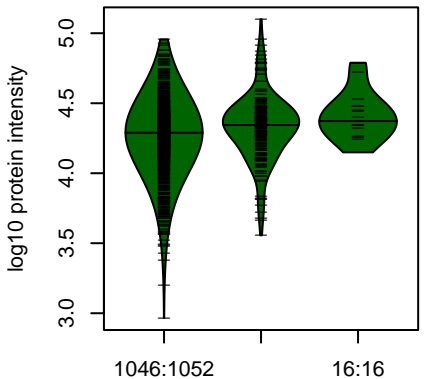

1:153520203:G:A\_A  
p = 0.0017, beta = 0.213, N = 1251

**ALDVMVSTFHK pc2  
P26447**

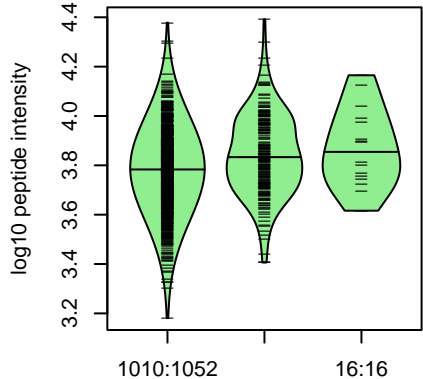

1:153520203:G:A\_A  
p = 0.00042, beta = 0.241, N = 1213

**TDEAAFQK pc2  
P26447**

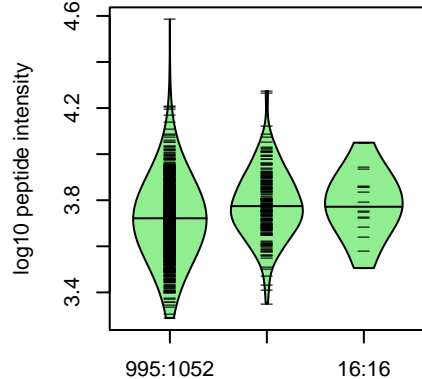

1:153520203:G:A\_A  
p = 2e-05, beta = 0.296, N = 1189

**ELPSFLGK pc2  
P26447**

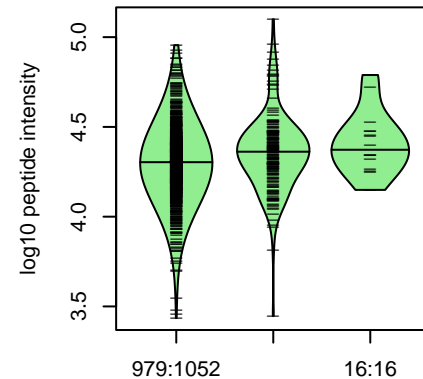

1:153520203:G:A\_A  
p = 0.017, beta = 0.165, N = 1174

**RTDEAAFQK pc2  
P26447**

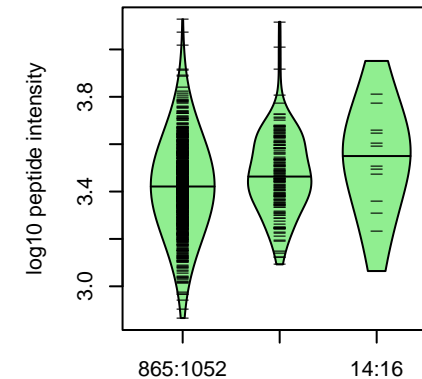

1:153520203:G:A\_A  
p = 0.0029, beta = 0.221, N = 1036

**S100A4 : NP2  
P26447**

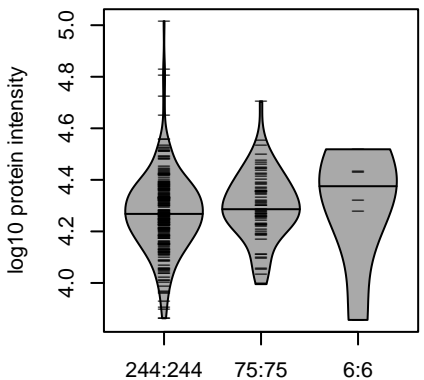

1:153520203:G:A\_A  
p = 0.35, beta = 0.107, N = 325

**ELPSFLGK pc2  
P26447**

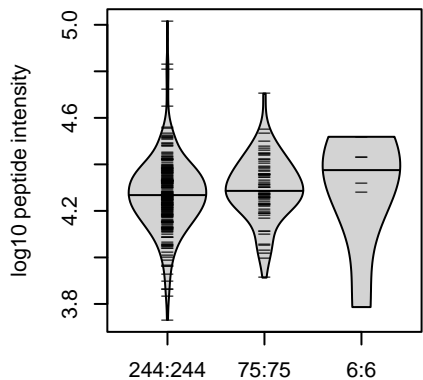

1:153520203:G:A\_A  
p = 0.36, beta = 0.104, N = 325

**ALDVMVSTFHK pc2  
P26447**

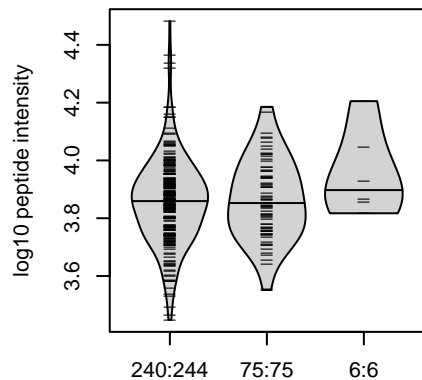

1:153520203:G:A\_A  
p = 0.45, beta = 0.085, N = 321

**TDEAAFQK pc2  
P26447**

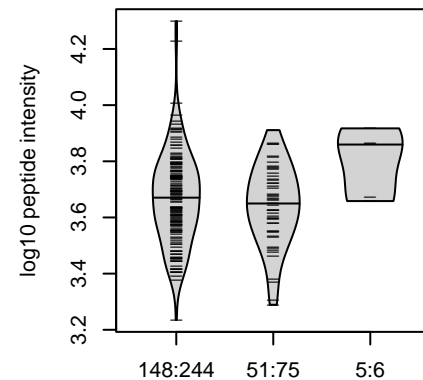

1:153520203:G:A\_A  
p = 0.94, beta = -0.0101, N = 204

**RTDEAAFQK pc2  
P26447**

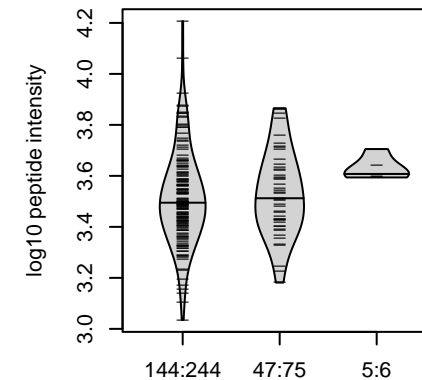

1:153520203:G:A\_A  
p = 0.2, beta = 0.175, N = 196

Assay Target: S100A4  
Olink UniProt: P26447  
UKB rsID: rs41265164  
Proxy rsID: rs41265164  
UKB SNP: 1:153520203:G:A  
Proxy SNP: 1:153520203:G:A  
UKB log10(p): 178.9  
UKB BETA: 0.373  
\*.\*-.\*:NA  
1213:1189:1174:1036:17

**CTHRC1 : NP3**  
**Q96CG8-3**

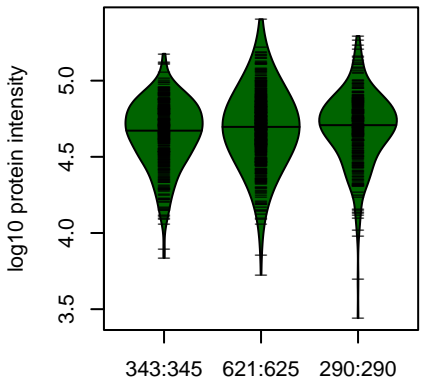

8:104364637:C:G\_C  
p = 0.0073, beta = 0.106, N = 1254

**GDASTGWNSVSR pc2**  
**E5RK99;Q96CG8;Q96CG8-3**

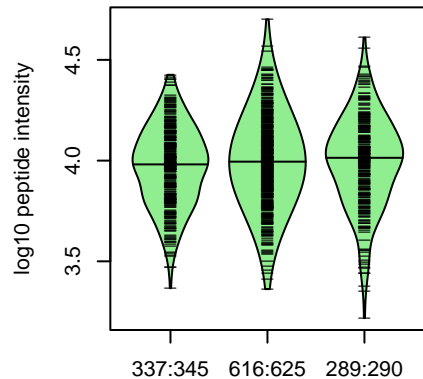

8:104364637:C:G\_C  
p = 0.11, beta = 0.0643, N = 1242

**VLFSGSLR pc2**  
**E5RK99;Q96CG8;Q96CG8-3**

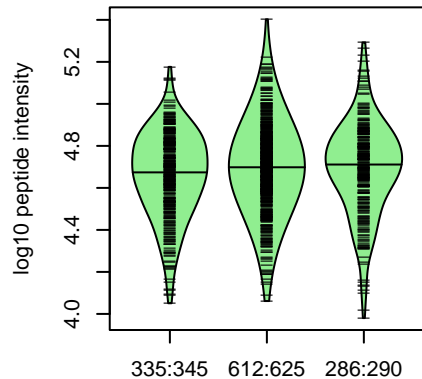

8:104364637:C:G\_C  
p = 0.014, beta = 0.0978, N = 1233

**ESFEESWTPNYK pc2**  
**E7EVQ5;Q96CG8;Q96CG8-3**

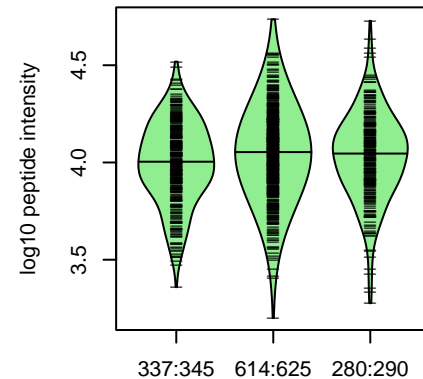

8:104364637:C:G\_C  
p = 0.019, beta = 0.0939, N = 1231

**IIIEELPK pc2**  
**E5RK99;Q96CG8;Q96CG8-3**

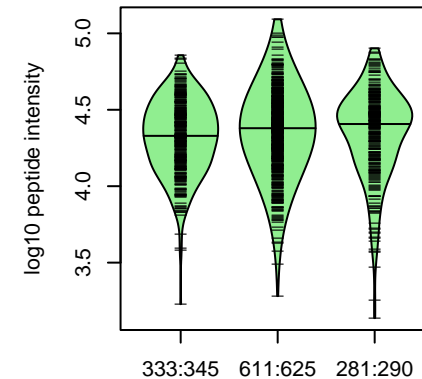

8:104364637:C:G\_C  
p = 0.082, beta = 0.0699, N = 1225

**CTHRC1 : NP3**  
**Q96CG8**

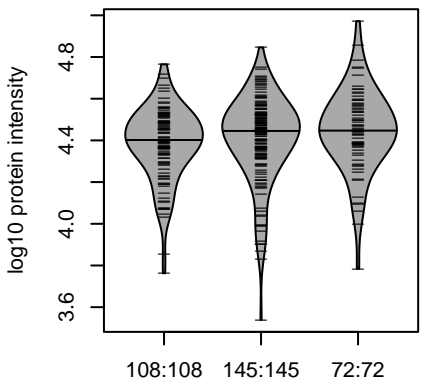

8:104364637:C:G\_C  
p = 0.015, beta = 0.18, N = 325

**ESFEESWTPNYK pc2**  
**E7EVQ5;Q96CG8;Q96CG8-3**

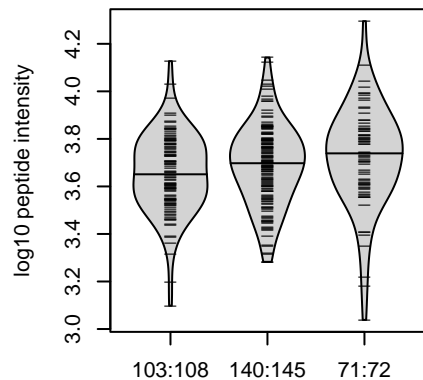

8:104364637:C:G\_C  
p = 0.009, beta = 0.196, N = 314

**VLFSGSLR pc2**  
**E5RK99;Q96CG8;Q96CG8-3**

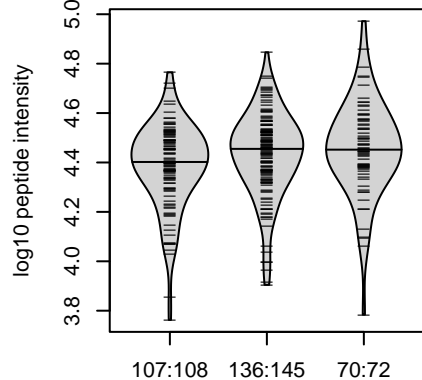

8:104364637:C:G\_C  
p = 0.0037, beta = 0.217, N = 313

**GDASTGWNSVSR pc2**  
**E5RK99;Q96CG8;Q96CG8-3**

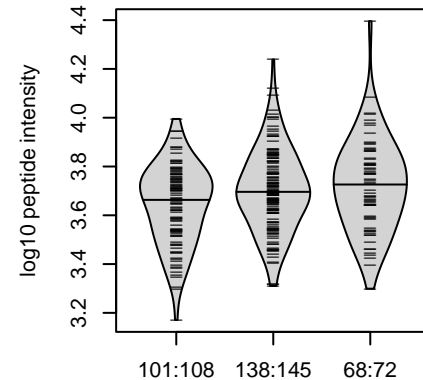

8:104364637:C:G\_C  
p = 9e-04, beta = 0.253, N = 307

**IIIEELPK pc2**  
**E5RK99;Q96CG8;Q96CG8-3**

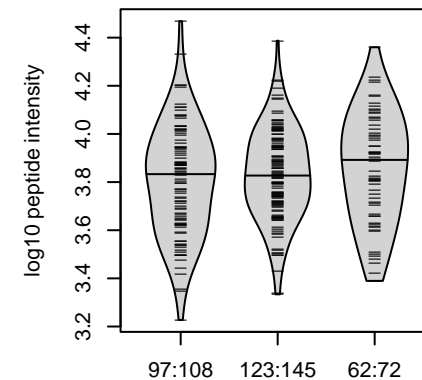

8:104364637:C:G\_C  
p = 0.14, beta = 0.117, N = 282

Assay Target: CTHRC1  
Olink UniProt: Q96CG8  
UKB rsID: rs827592  
Proxy rsID: rs827592  
UKB SNP: 8:104364637:C:G  
Proxy SNP: 8:104364637:C:G  
UKB log10(p): 177.8  
UKB BETA: -0.157  
-----  
1242:1233:1231:1225:1143:966

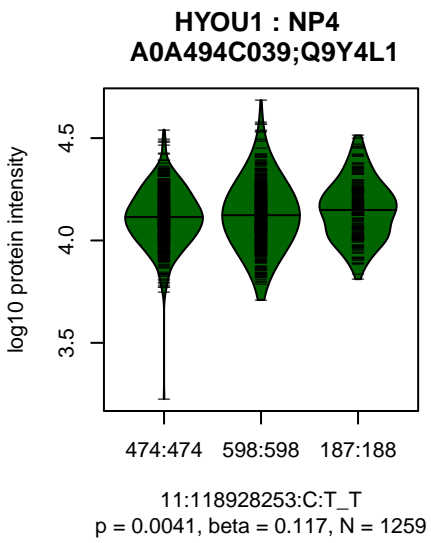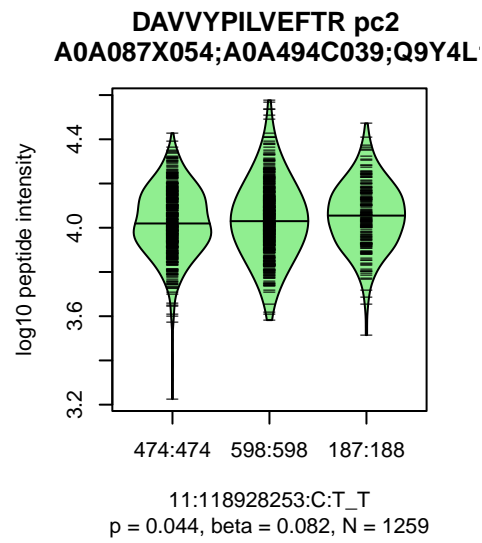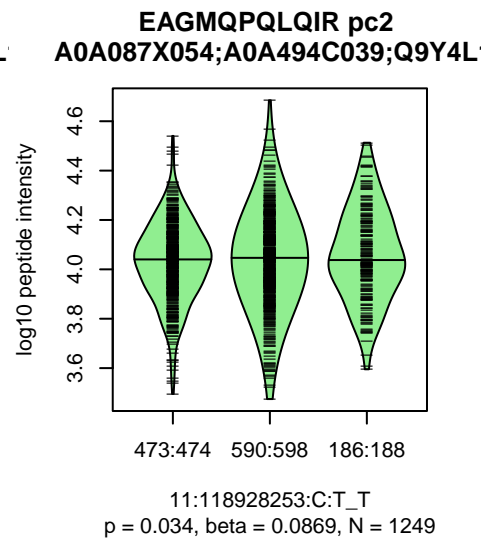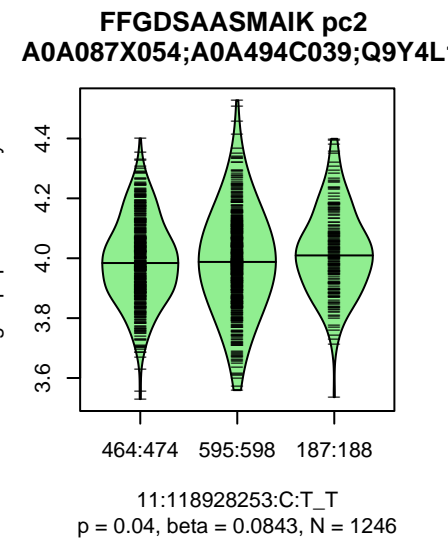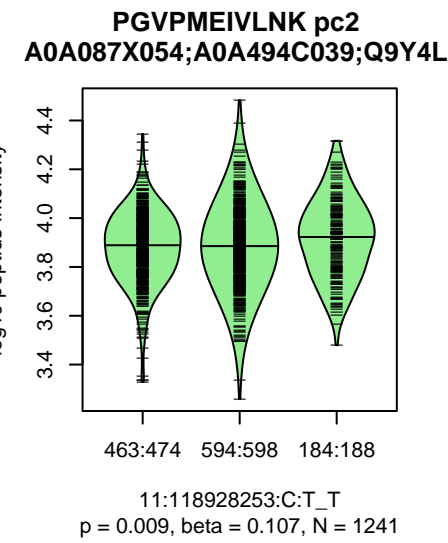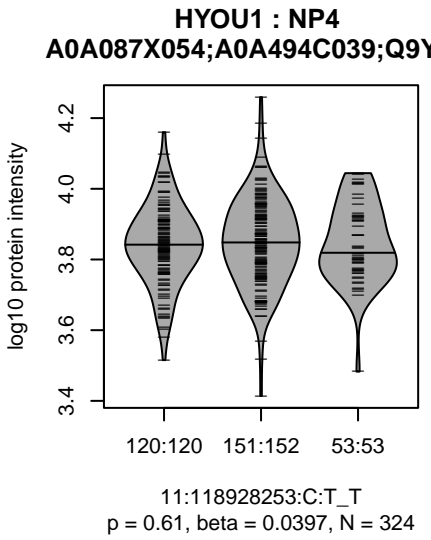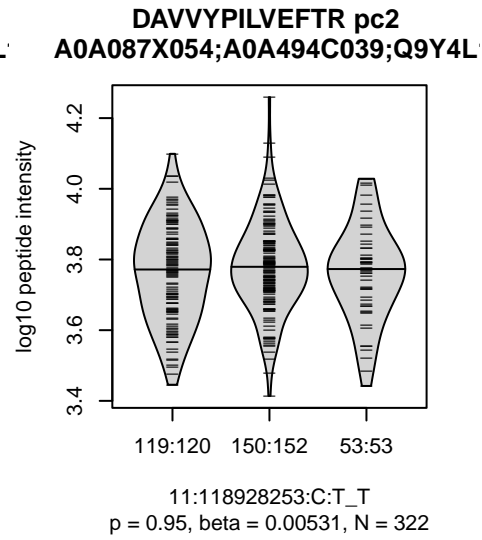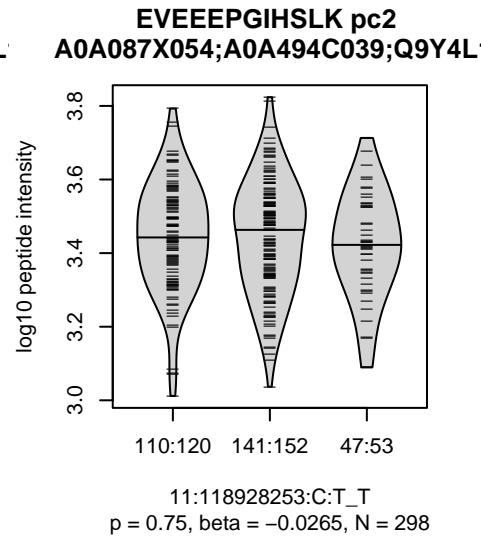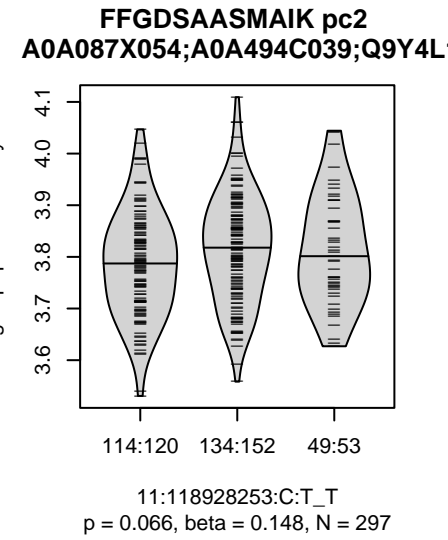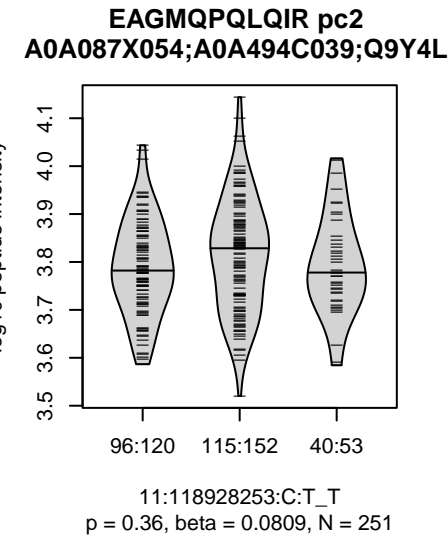

Assay Target: HYOU1  
 Olink UniProt: Q9Y4L1  
 UKB rsID: rs2509121  
 Proxy rsID: rs2509121  
 UKB SNP: 11:118928253:C:T  
 Proxy SNP: 11:118928253:C:T  
 UKB log10(p): 175.7  
 UKB BETA: 0.173  
 -----  
 1259:1249:1246:1241:1200:119

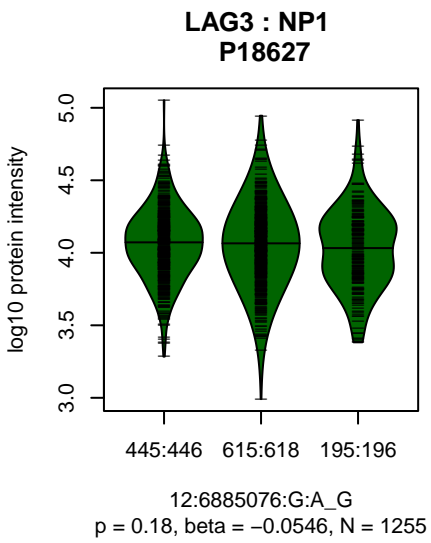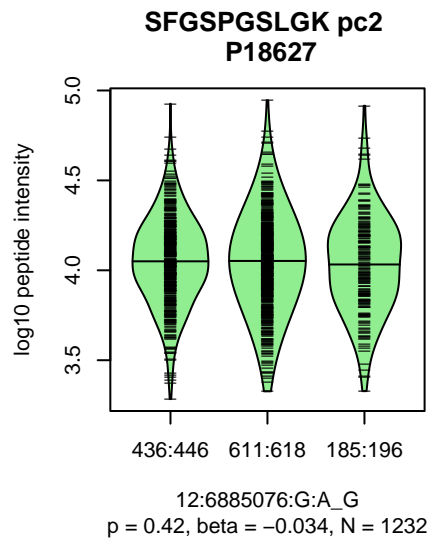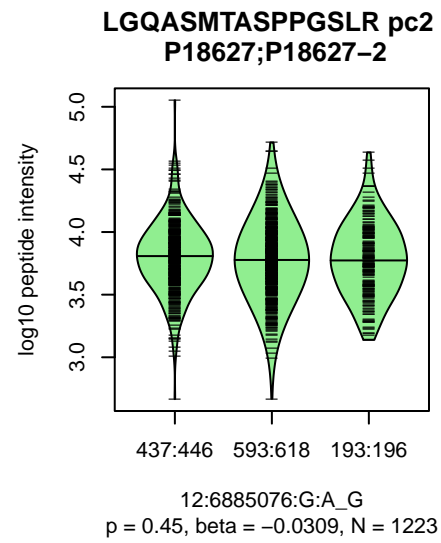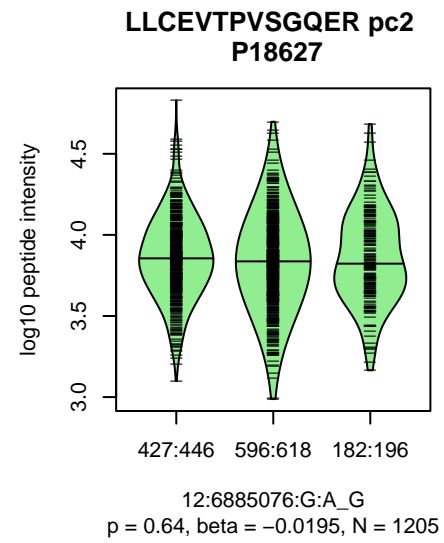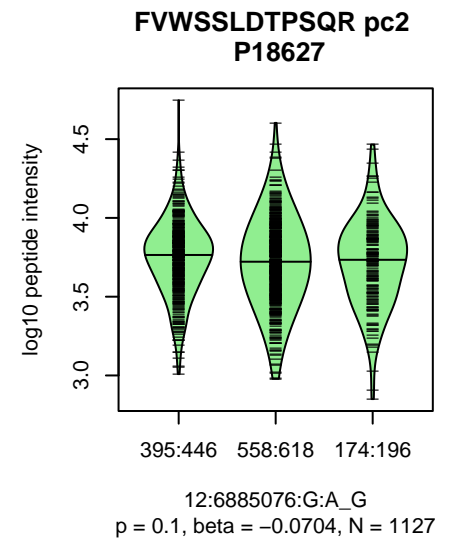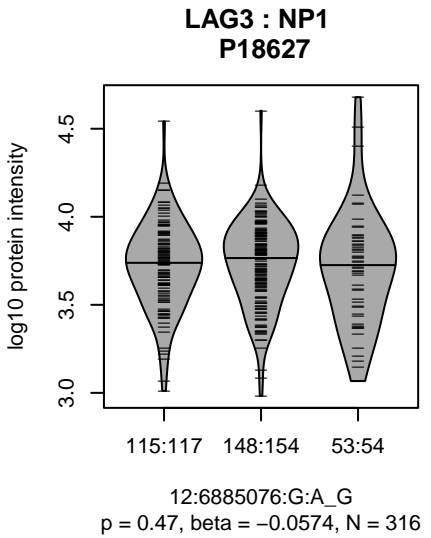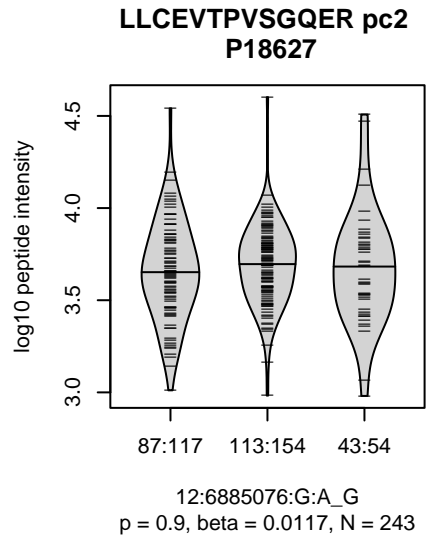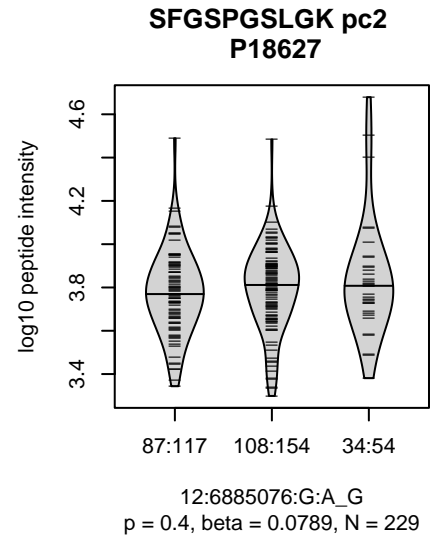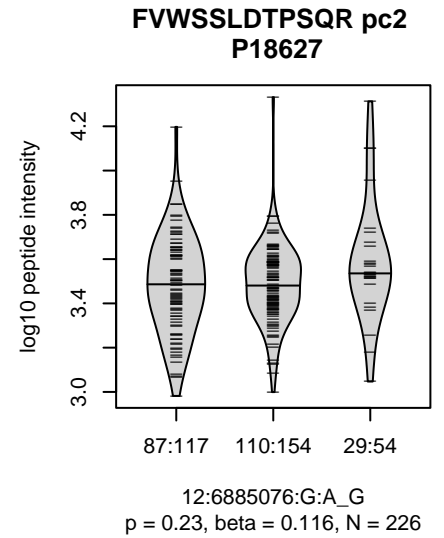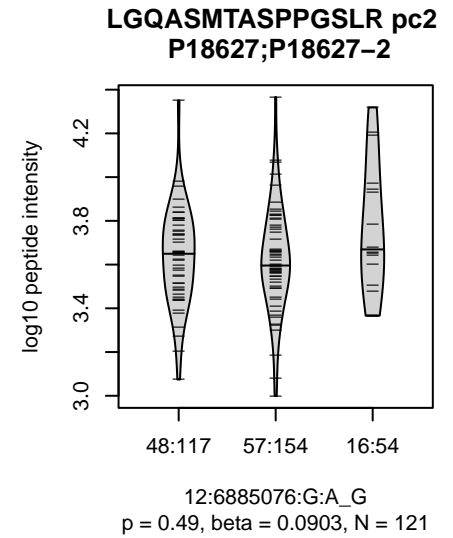

Assay Target: LAG3  
 Olink UniProt: P18627  
 UKB rsID: rs3782735  
 Proxy rsID: rs3782735  
 UKB SNP: 12:6885076:G:A  
 Proxy SNP: 12:6885076:G:A  
 UKB log10(p): 173.6  
 UKB BETA: 0.174  
 - - - - -  
 1232:1223:1205:1127:651:92:59





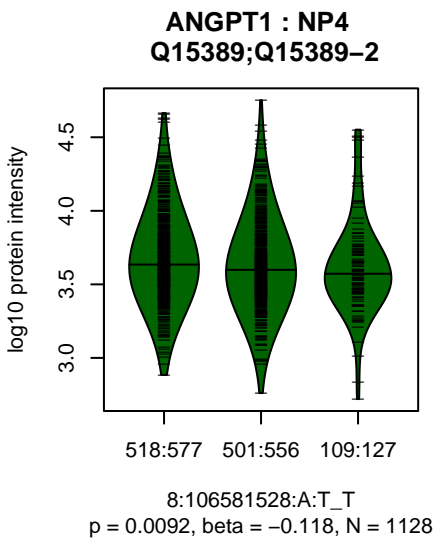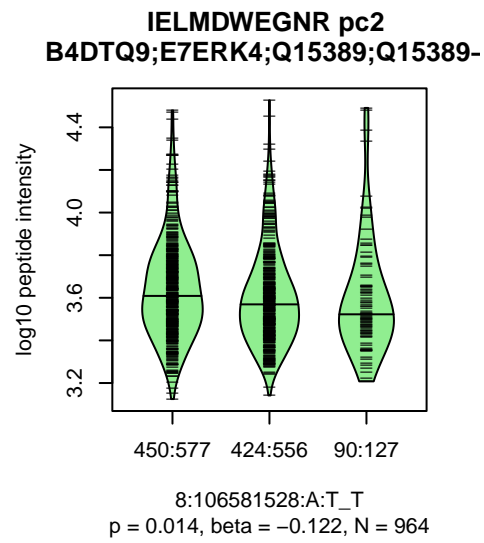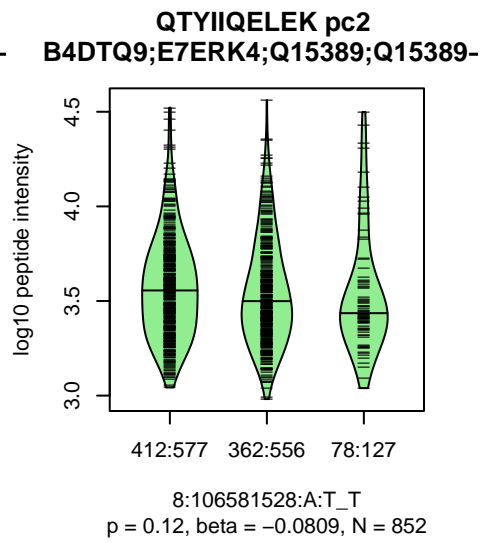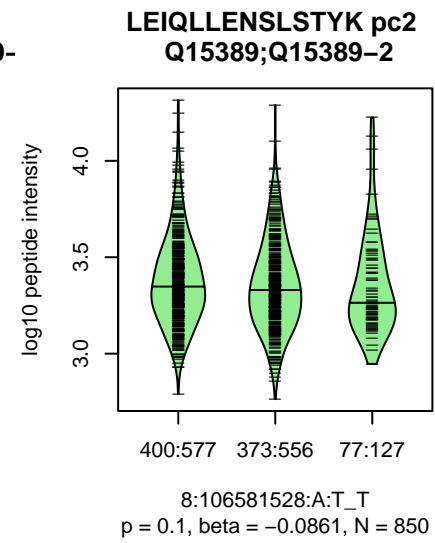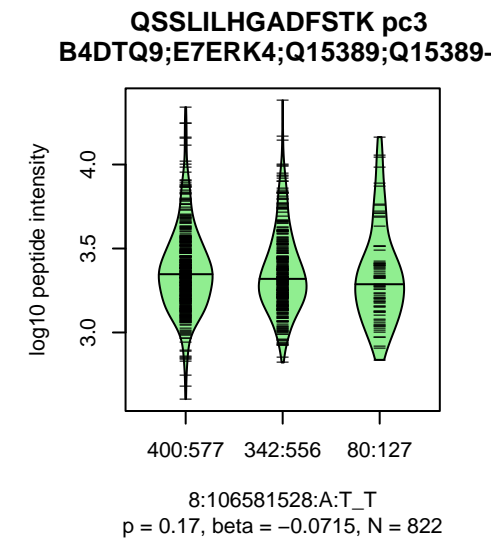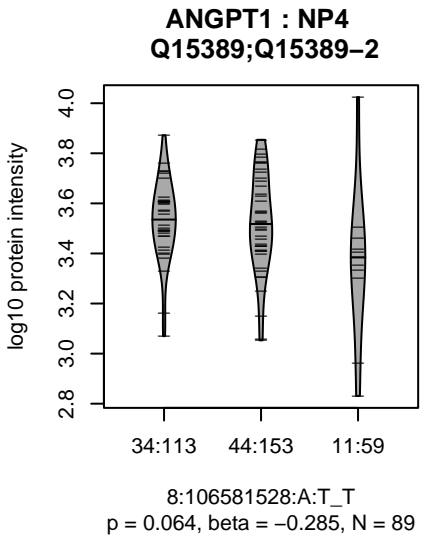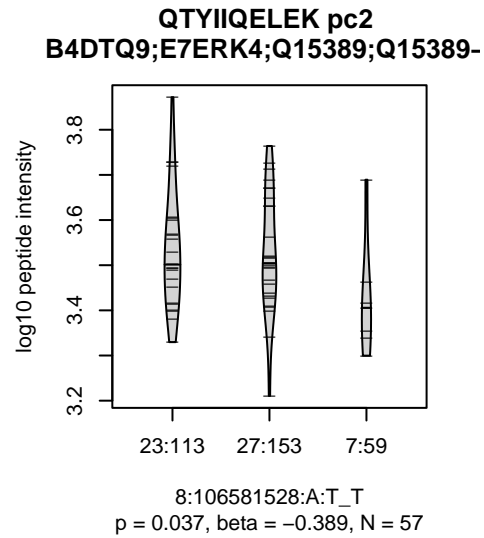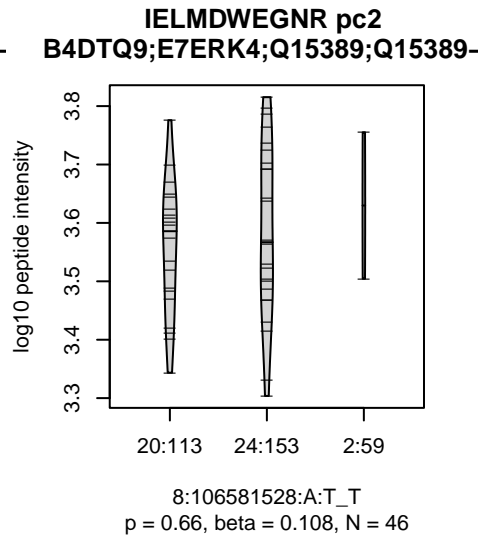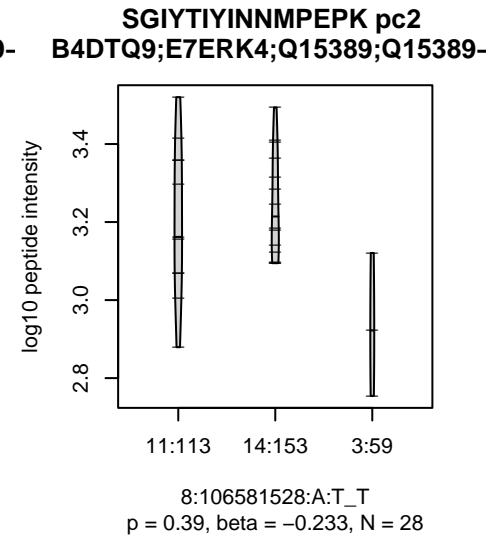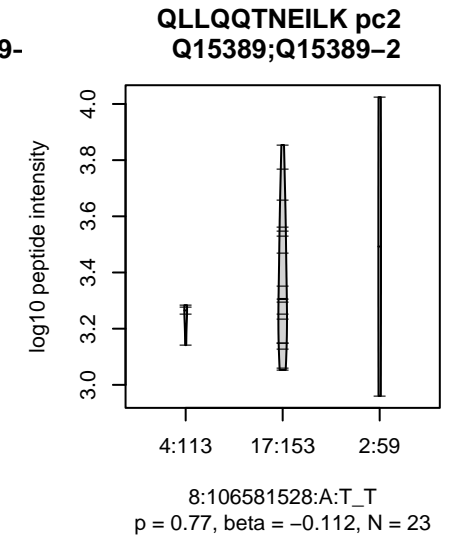

Assay Target: ANGPT1  
 Olink UniProt: Q15389  
 UKB rsID: rs6993770  
 Proxy rsID: rs6993770  
 UKB SNP: 8:106581528:A:T  
 Proxy SNP: 8:106581528:A:T  
 UKB log10(p): 172.5  
 UKB BETA: -0.187  
 -----  
 964:852:850:822:732:624:507:4

**ESM1 : NP2  
Q9NQ30**

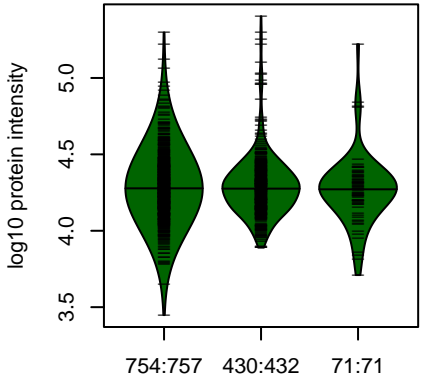

5:54198775:T:C\_T  
p = 0.37, beta = -0.0418, N = 1255

**FPPFQYSVTK pc2  
Q9NQ30**

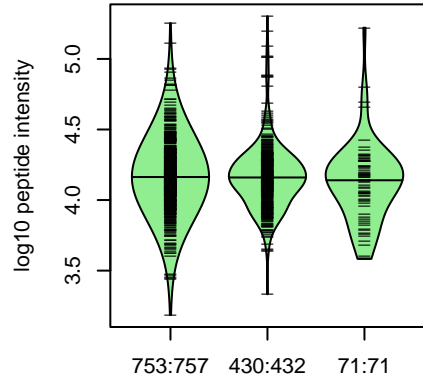

5:54198775:T:C\_T  
p = 0.04, beta = -0.096, N = 1254

**TVLDDCGCCR pc2  
Q9NQ30;Q9NQ30-2**

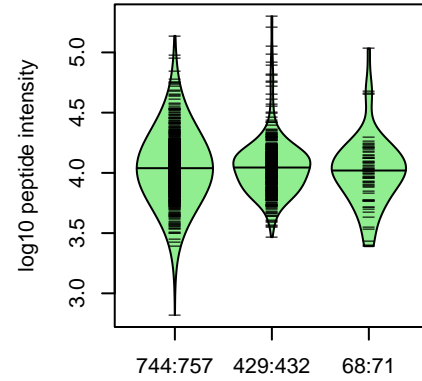

5:54198775:T:C\_T  
p = 0.13, beta = -0.0721, N = 1241

**ENAAGSPVMR pc2  
Q9NQ30;Q9NQ30-2**

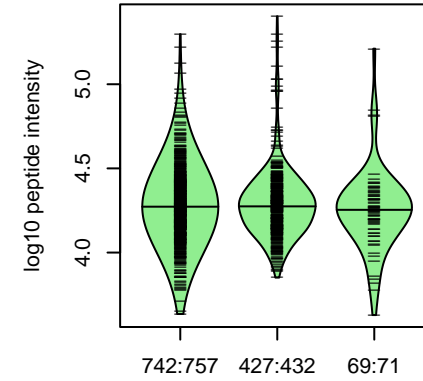

5:54198775:T:C\_T  
p = 0.34, beta = -0.0455, N = 1238

**DCPYGTFGMDCR pc2  
Q9NQ30**

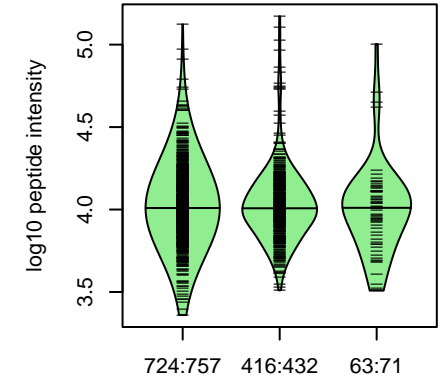

5:54198775:T:C\_T  
p = 0.21, beta = -0.061, N = 1203

**ESM1 : NP2  
Q9NQ30**

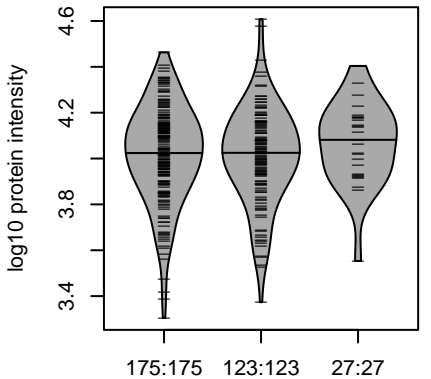

5:54198775:T:C\_T  
p = 0.66, beta = 0.0373, N = 325

**FPPFQYSVTK pc2  
Q9NQ30**

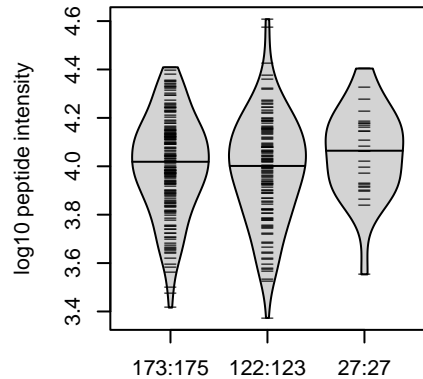

5:54198775:T:C\_T  
p = 0.72, beta = 0.031, N = 322

**TVLDDCGCCR pc2  
Q9NQ30;Q9NQ30-2**

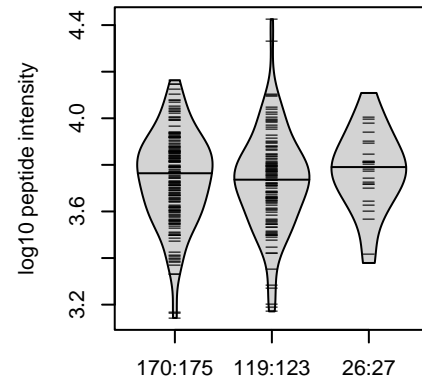

5:54198775:T:C\_T  
p = 0.9, beta = -0.0111, N = 315

**ETCNCQSGICDR pc2  
Q9NQ30**

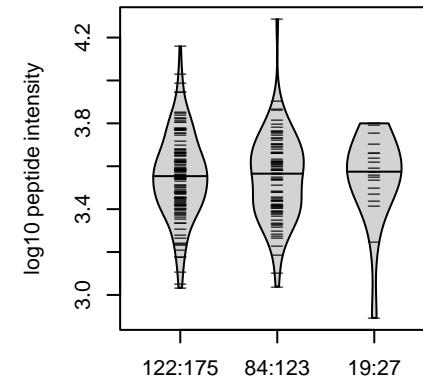

5:54198775:T:C\_T  
p = 0.74, beta = -0.0338, N = 225

**DCPYGTFGMDCR pc2  
Q9NQ30**

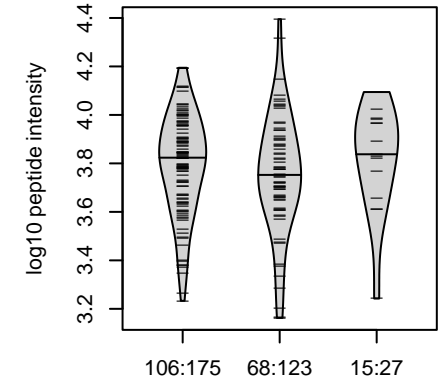

5:54198775:T:C\_T  
p = 0.65, beta = -0.0511, N = 189

Assay Target: ESM1  
Olink UniProt: Q9NQ30  
UKB rsID: rs4242051  
Proxy rsID: rs4242051  
UKB SNP: 5:54198775:T:C  
Proxy SNP: 5:54198775:T:C  
UKB log10(p): 166.8  
UKB BETA: 0.191  
-----  
1254:1241:1238:1203:1146:998

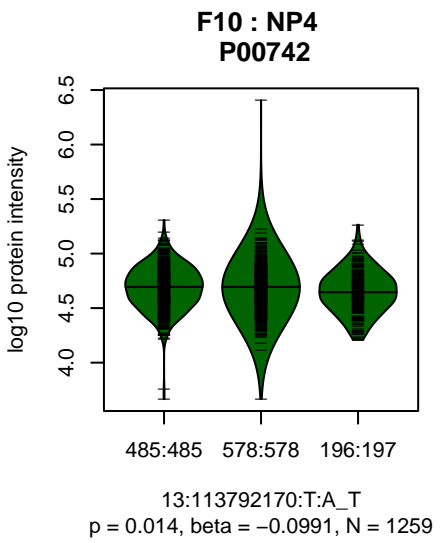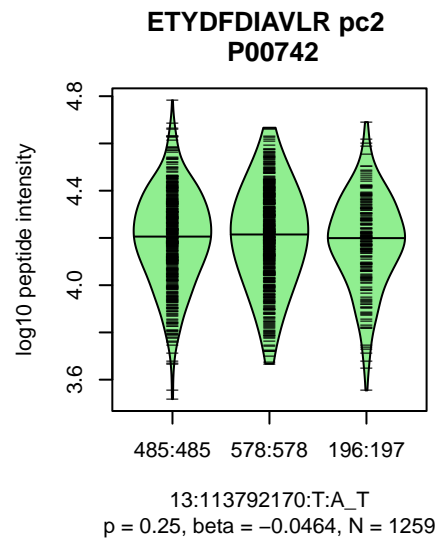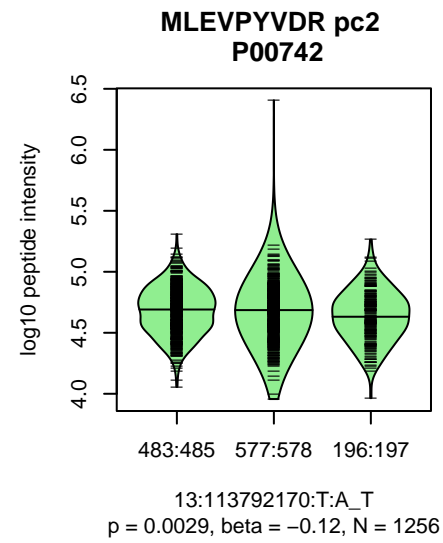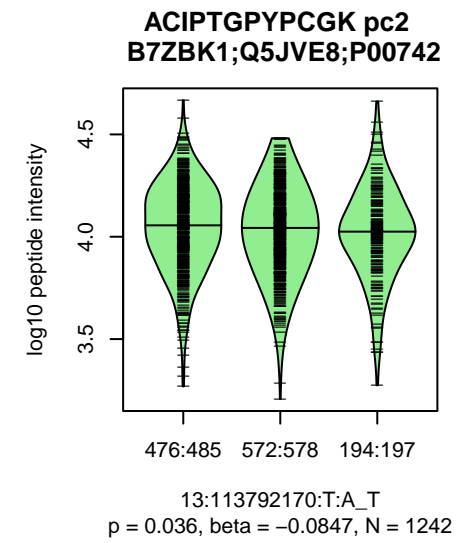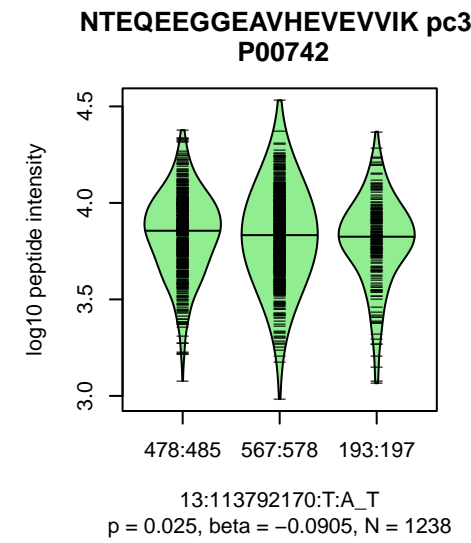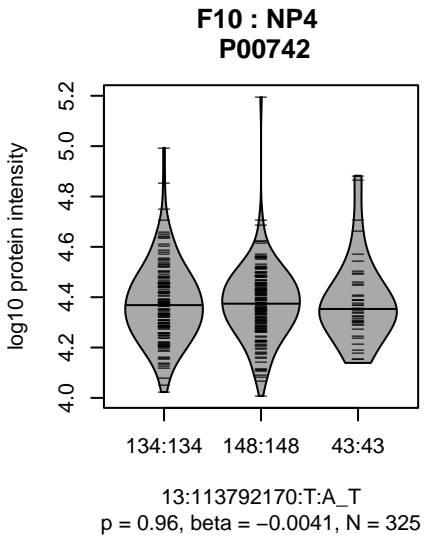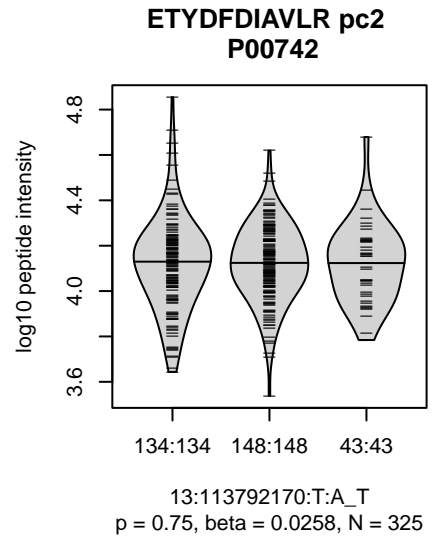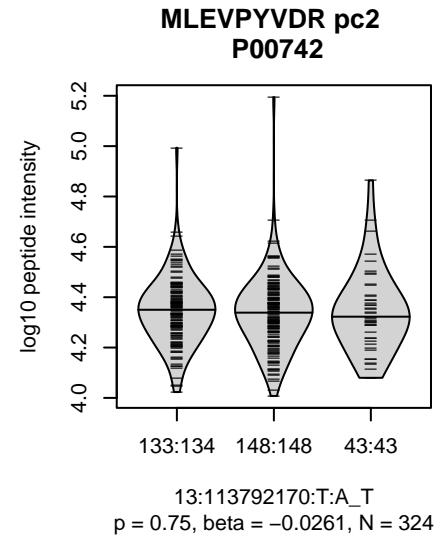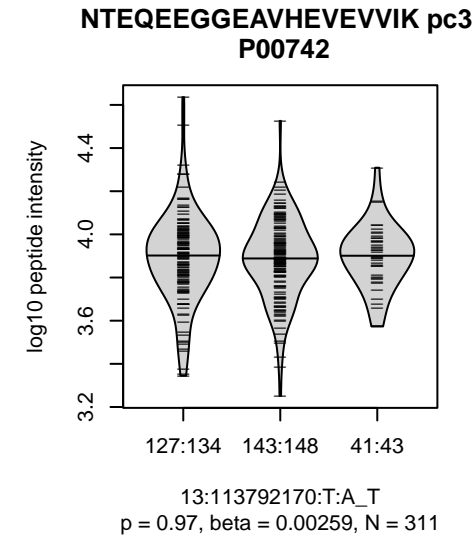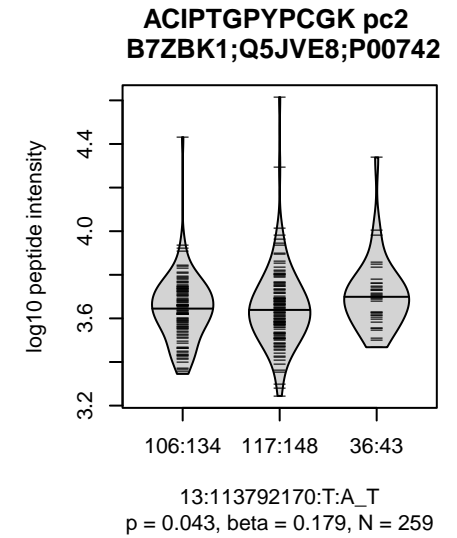

Assay Target: F10  
 Olink UniProt: P00742  
 UKB rsID: rs547138  
 Proxy rsID: rs547138  
 UKB SNP: 13:113792170:T:A  
 Proxy SNP: 13:113792170:T:A  
 UKB log10(p): 159.6  
 UKB BETA: 0.17  
 -\*:-----:NA  
 1259:1256:1242:1238:1216:106

**EHD3 : NP1  
Q9NZN3**

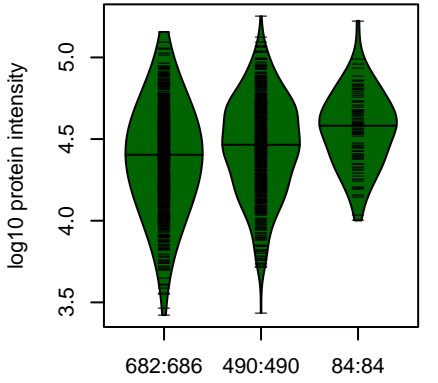

2:31477838:G:A\_G  
p = 7.2e-08, beta = 0.243, N = 1256

**LLPLEEHYR pc2  
A0A024R571;Q9NZN3;Q9H4M9;Q9N**

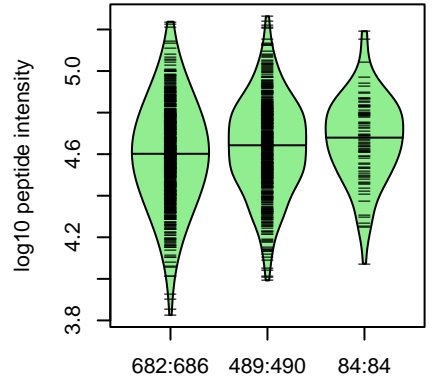

2:31477838:G:A\_G  
p = 0.0072, beta = 0.122, N = 1255

**VYGALMWSLGK pc2  
A0A024R571;Q9NZN3;Q9H223;Q9H4**

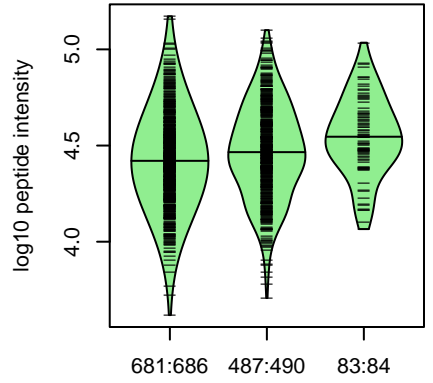

2:31477838:G:A\_G  
p = 1.7e-05, beta = 0.195, N = 1251

**YLLEQDFPGMR pc2  
Q9NZN3;Q9H223**

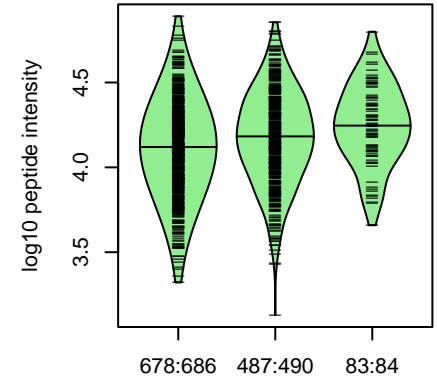

2:31477838:G:A\_G  
p = 3.3e-06, beta = 0.211, N = 1248

**VHAYISSLK pc2  
A0A024R571;Q9NZN3;Q9H4M9**

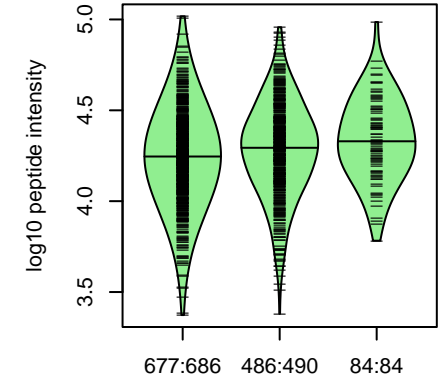

2:31477838:G:A\_G  
p = 0.001, beta = 0.149, N = 1247

**EHD3 : NP1  
Q9NZN3**

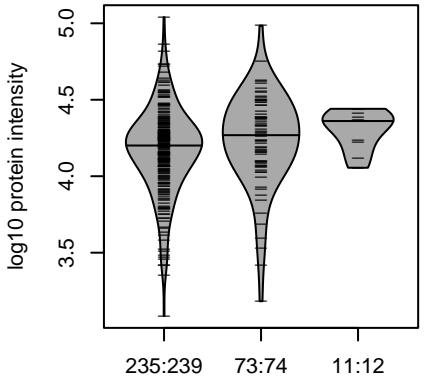

2:31477838:G:A\_G  
p = 0.0031, beta = 0.308, N = 319

**VHAYISSLK pc2  
A0A024R571;Q9NZN3;Q9H4M9**

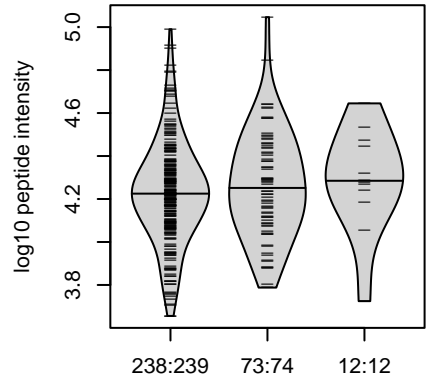

2:31477838:G:A\_G  
p = 0.08, beta = 0.18, N = 323

**VYGALMWSLGK pc2  
A0A024R571;Q9NZN3;Q9H223;Q9H4**

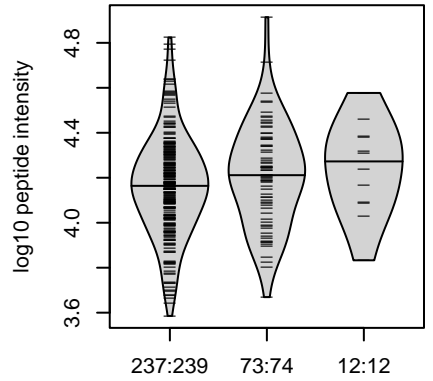

2:31477838:G:A\_G  
p = 0.02, beta = 0.239, N = 322

**LFEAEEQDLFR pc2  
Q9NZN3**

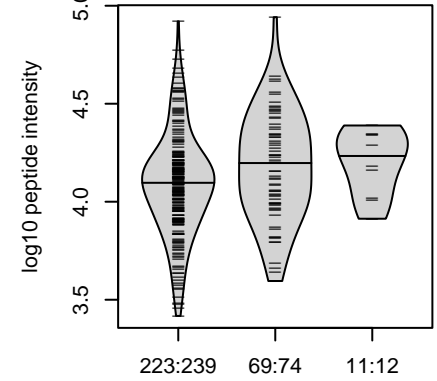

2:31477838:G:A\_G  
p = 0.0018, beta = 0.331, N = 303

**LLPLEEHYR pc2  
A0A024R571;Q9NZN3;Q9H4M9;Q9N**

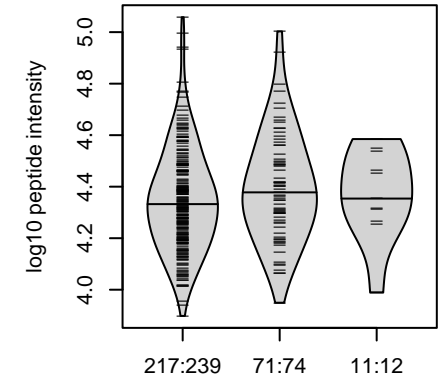

2:31477838:G:A\_G  
p = 0.028, beta = 0.233, N = 299

Assay Target: EHD3  
Olink UniProt: Q9NZN3  
UKB rsID: rs655029  
Proxy rsID: rs655029  
UKB SNP: 2:31477838:G:A  
Proxy SNP: 2:31477838:G:A  
UKB log10(p): 159.6  
UKB BETA: -0.19  
\*\*\*\*\*\_\*\*\*\*\*  
1255:1251:1248:1247:1239:123

**AXL : NP2**  
**P30530**

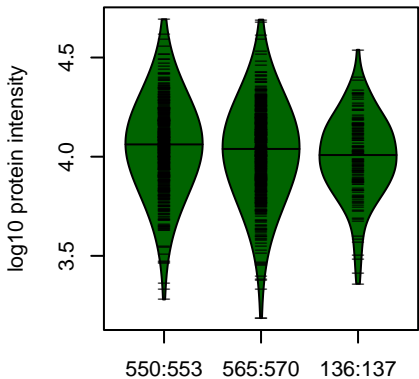

19:41739534:G:C\_C  
p = 0.006, beta = -0.117, N = 1251

**TATITVLPQQPR pc2**  
**P30530;P30530-2**

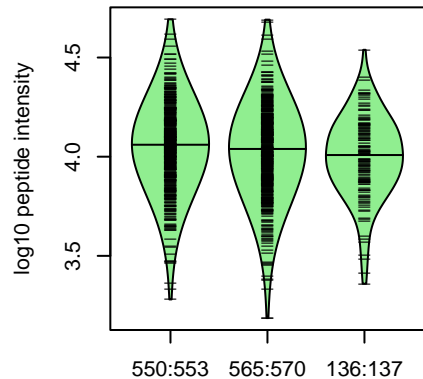

19:41739534:G:C\_C  
p = 0.008, beta = -0.113, N = 1251

**APLQGTLLGYR pc2**  
**M0R0W6;P30530;P30530-2**

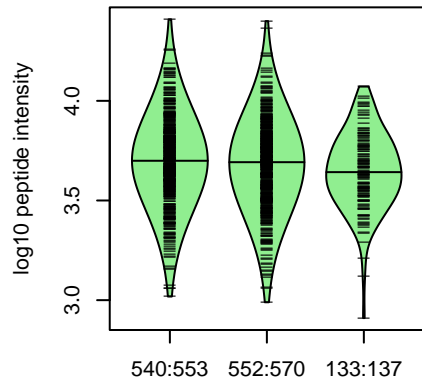

19:41739534:G:C\_C  
p = 0.029, beta = -0.0935, N = 1225

**TSSFSCEAHNAK pc2**  
**P30530;P30530-2**

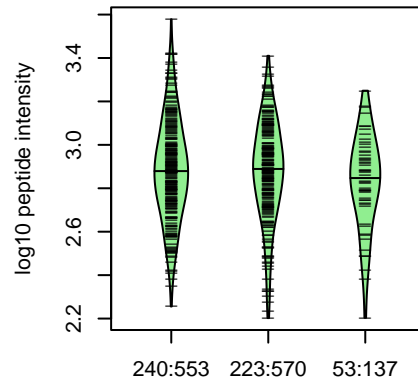

19:41739534:G:C\_C  
p = 0.24, beta = -0.0774, N = 516

**NLHLVSR pc2**  
**P30530;P30530-2**

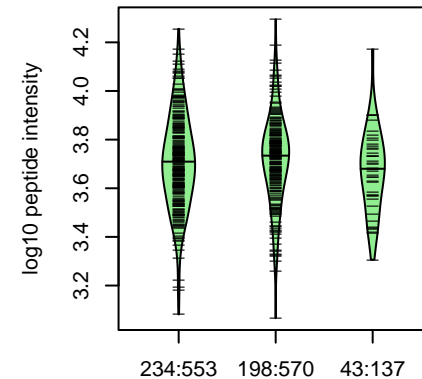

19:41739534:G:C\_C  
p = 0.62, beta = -0.0346, N = 475

**AXL : NP2**  
**P30530;P30530-2**

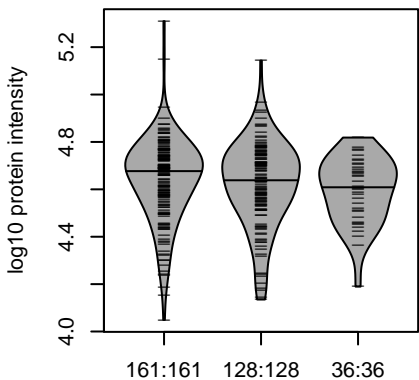

19:41739534:G:C\_C  
p = 0.046, beta = -0.161, N = 325

**APLQGTLLGYR pc2**  
**M0R0W6;P30530;P30530-2**

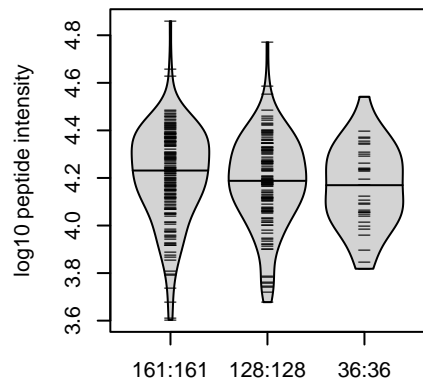

19:41739534:G:C\_C  
p = 0.026, beta = -0.18, N = 325

**TATITVLPQQPR pc2**  
**P30530;P30530-2**

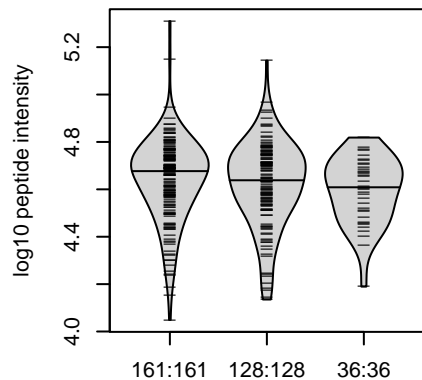

19:41739534:G:C\_C  
p = 0.046, beta = -0.161, N = 325

**NLHLVSR pc2**  
**P30530;P30530-2**

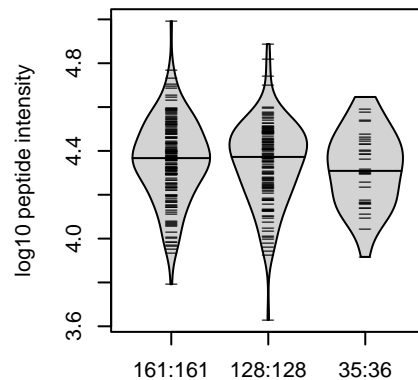

19:41739534:G:C\_C  
p = 0.12, beta = -0.128, N = 324

**TSSFSCEAHNAK pc2**  
**P30530;P30530-2**

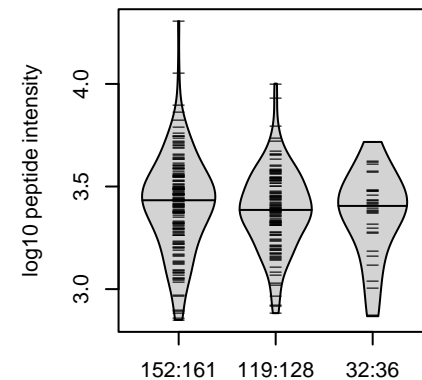

19:41739534:G:C\_C  
p = 0.05, beta = -0.165, N = 303

Assay Target: AXL  
Olink UniProt: P30530  
UKB rsID: rs74816457  
Proxy rsID: rs74816457  
UKB SNP: 19:41739534:G:C  
Proxy SNP: 19:41739534:G:C  
UKB log10(p): 159.4  
UKB BETA: -0.166  
\*:---:---:---:---:---  
1251:1225:516:475:374:210:11



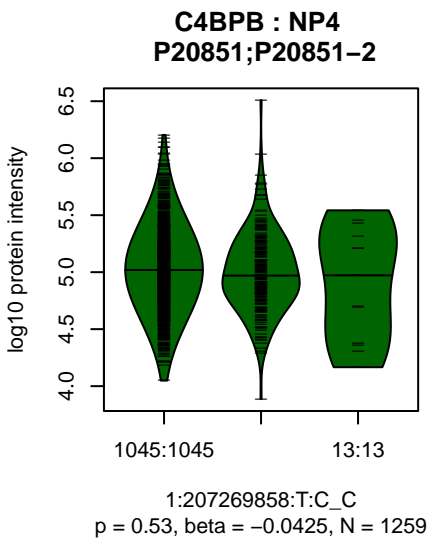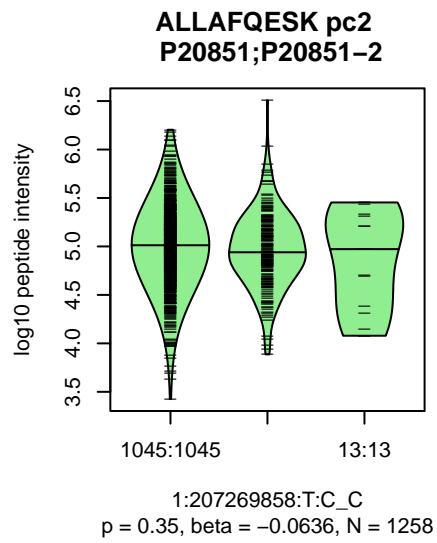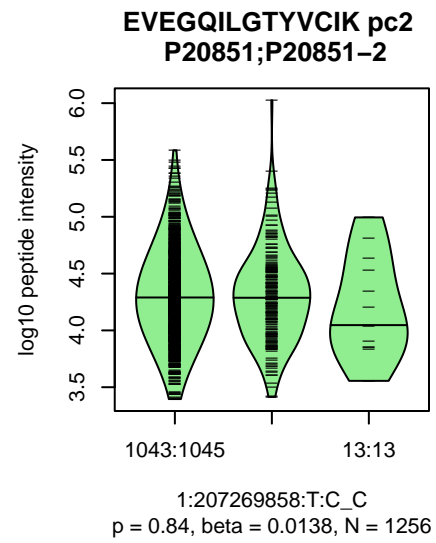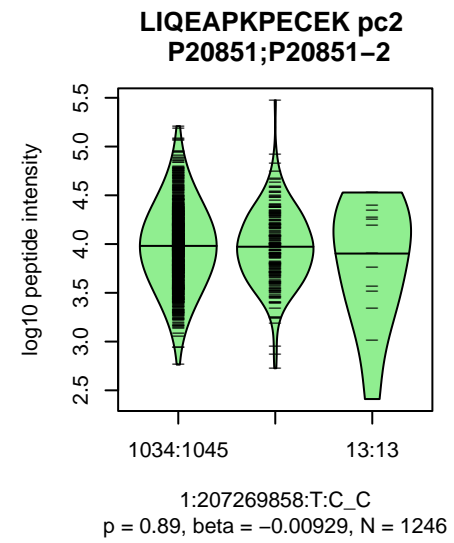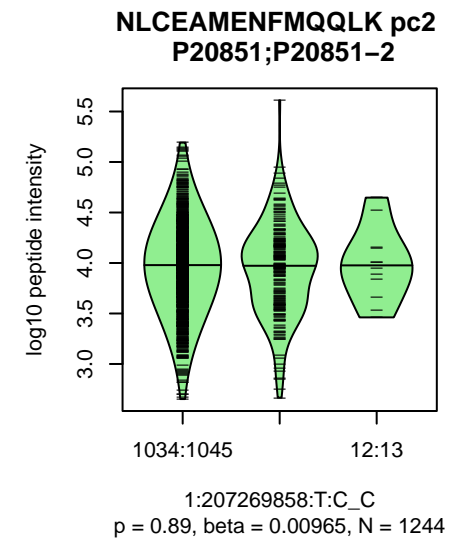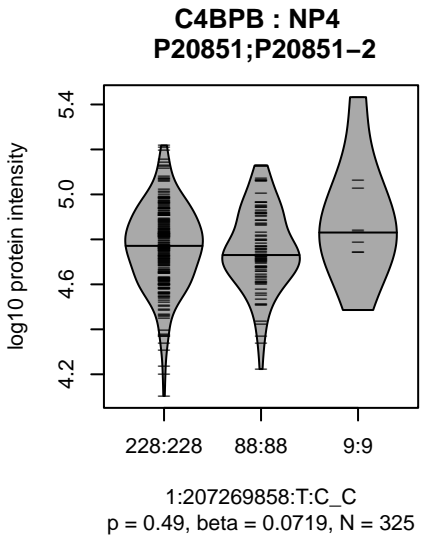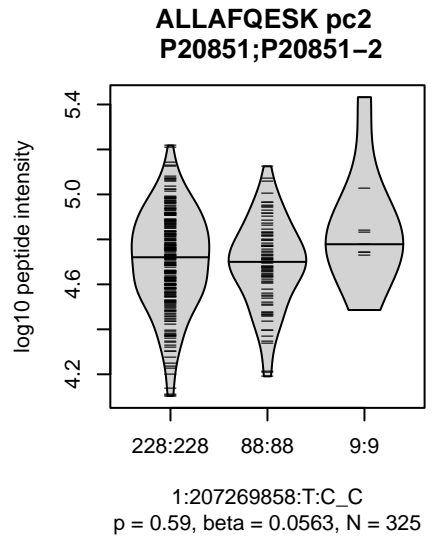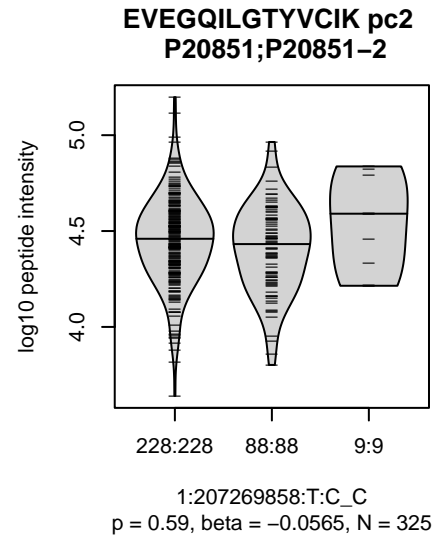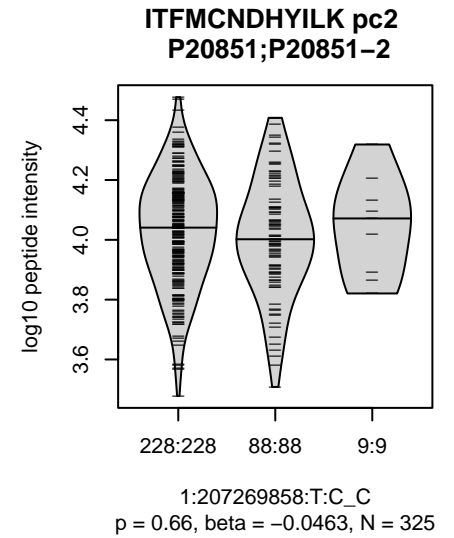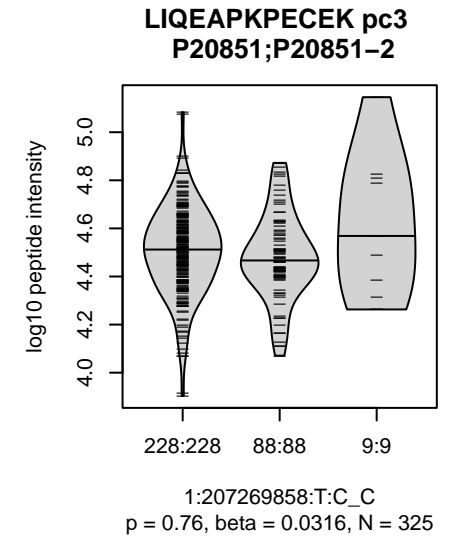

Assay Target: C4BPB  
 Olink UniProt: P20851  
 UKB rsID: rs3813948  
 Proxy rsID: rs3813948  
 UKB SNP: 1:207269858:T:C  
 Proxy SNP: 1:207269858:T:C  
 UKB log10(p): 158  
 UKB BETA: -0.295  
 -----NA  
 1258:1256:1246:1245:1244:123

**FIS1 : NP4  
Q9Y3D6**

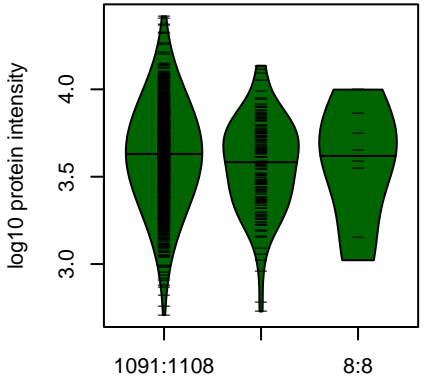

7:100865866:C:T\_T  
p = 0.01, beta = -0.207, N = 1239

**GIVLLELLPK pc2  
Q9Y3D6**

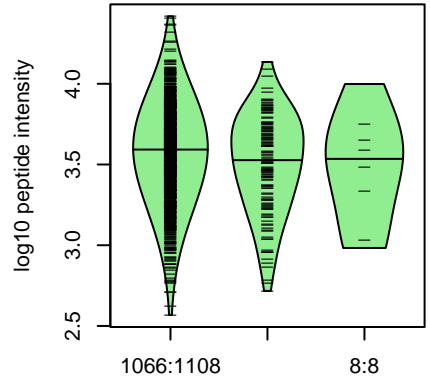

7:100865866:C:T\_T  
p = 0.008, beta = -0.217, N = 1208

**STQFEYAWCLVR pc2  
Q9Y3D6**

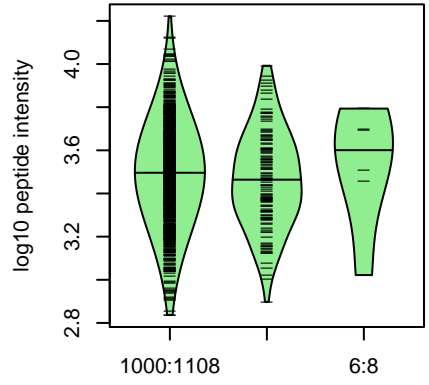

7:100865866:C:T\_T  
p = 0.27, beta = -0.0939, N = 1135

**GLLQTEPQNNQAK pc2  
Q9Y3D6**

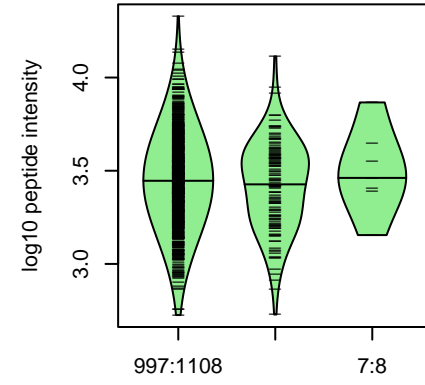

7:100865866:C:T\_T  
p = 0.31, beta = -0.0866, N = 1129

**EEQRDYVFYLAVGNYR pc3  
Q9Y3D6**

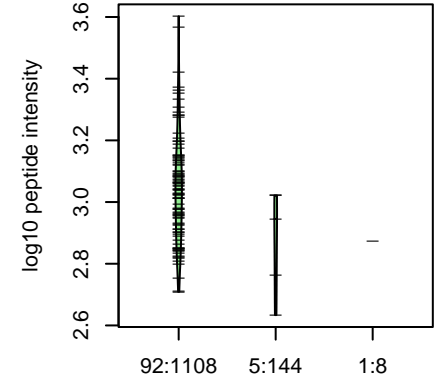

7:100865866:C:T\_T  
p = 0.041, beta = -0.673, N = 98

**FIS1 : NP4  
Q9Y3D6**

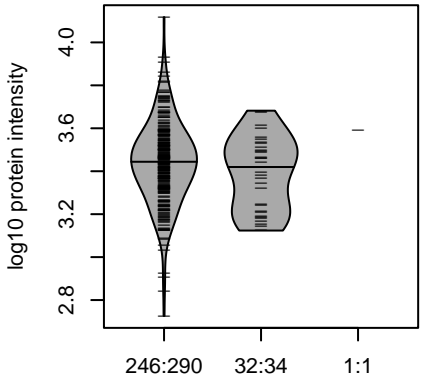

7:100865866:C:T\_T  
p = 0.25, beta = -0.202, N = 279

**GLLQTEPQNNQAK pc2  
Q9Y3D6**

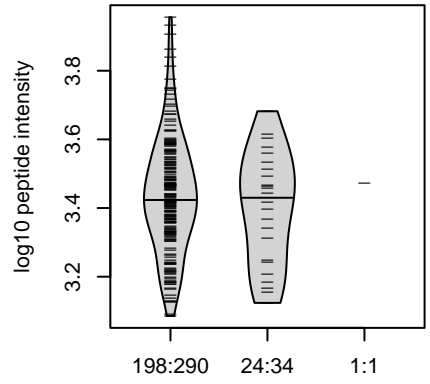

7:100865866:C:T\_T  
p = 0.33, beta = -0.193, N = 223

**GIVLLELLPK pc2  
Q9Y3D6**

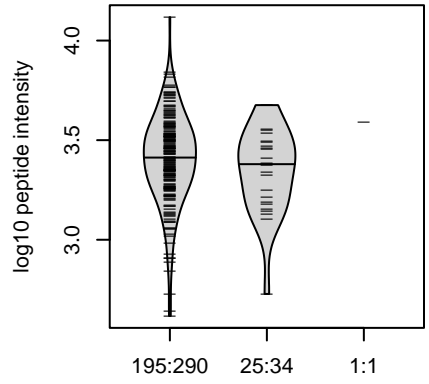

7:100865866:C:T\_T  
p = 0.55, beta = -0.116, N = 221

**STQFEYAWCLVR pc2  
Q9Y3D6**

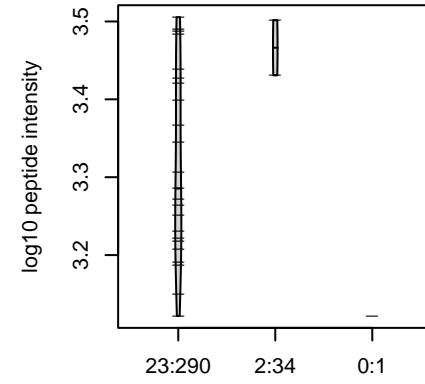

7:100865866:C:T\_T  
p = 0.7, beta = 0.268, N = 25

Assay Target: FIS1  
Olink UniProt: Q9Y3D6  
UKB rsID: rs74662330  
Proxy rsID: rs74662330  
UKB SNP: 7:100865866:C:T  
Proxy SNP: 7:100865866:C:T  
UKB log10(p): 155.2  
UKB BETA: -0.353  
\*:-:-:-  
1208:1135:1129:98



**NPY : NP2  
P01303**

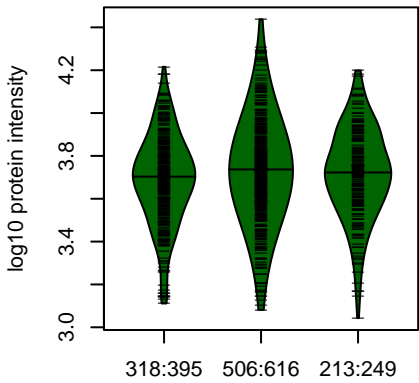

7:24309098:A:T\_A  
 $p = 0.1$ ,  $\beta = 0.0708$ ,  $N = 1037$

**SSPETLISDLLMR pc2  
P01303**

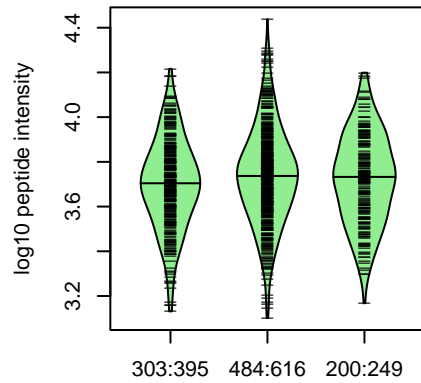

7:24309098:A:T\_A  
 $p = 0.11$ ,  $\beta = 0.0718$ ,  $N = 987$

**ESTENVPR pc2  
P01303**

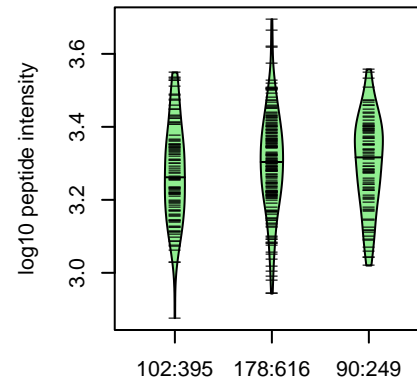

7:24309098:A:T\_A  
 $p = 0.26$ ,  $\beta = 0.0806$ ,  $N = 370$

**TRLEDPAMW pc2  
P01303**

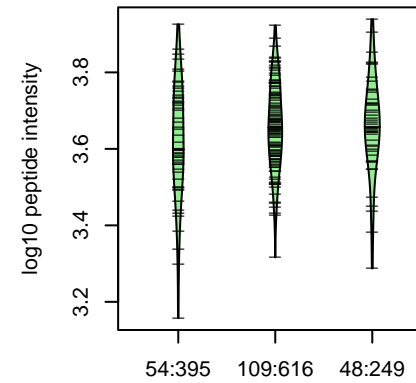

7:24309098:A:T\_A  
 $p = 0.068$ ,  $\beta = 0.177$ ,  $N = 211$

**HYINLITR pc2  
P01303**

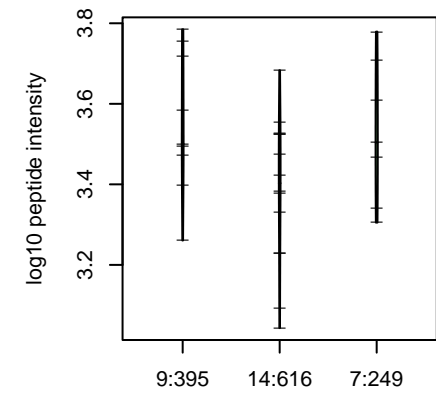

7:24309098:A:T\_A  
 $p = 0.85$ ,  $\beta = -0.0439$ ,  $N = 30$

Assay Target: NPY  
Olink UniProt: P01303  
UKB rsID: rs4722337  
Proxy rsID: rs4722337  
UKB SNP: 7:24309098:A:T  
Proxy SNP: 7:24309098:A:T  
UKB log10(p): 152.7  
UKB BETA: -0.157  
-:-:-:-  
987:370:211:30

**ST6GAL1 : NP1**  
**P15907**

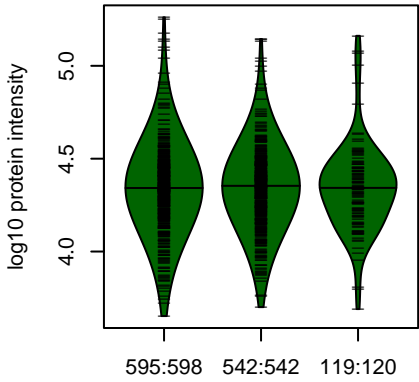

3:186739677:G:A\_A  
p = 0.8, beta = 0.0107, N = 1256

**FFDSACTMGAYHPLLYEK pc3**  
**P15907;P15907-2**

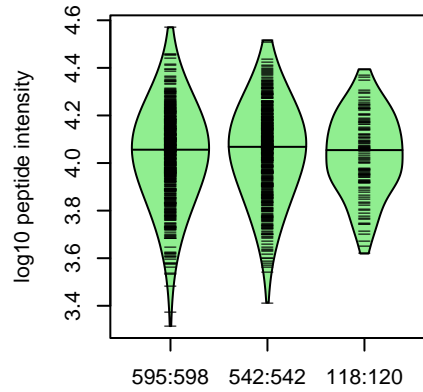

3:186739677:G:A\_A  
p = 0.28, beta = 0.0466, N = 1255

**LMNSQLVTTEK pc2**  
**P15907**

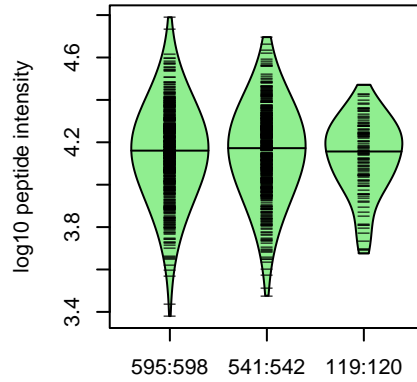

3:186739677:G:A\_A  
p = 0.98, beta = -0.00109, N = 1255

**CAVVSSAGSLK pc2**  
**P15907**

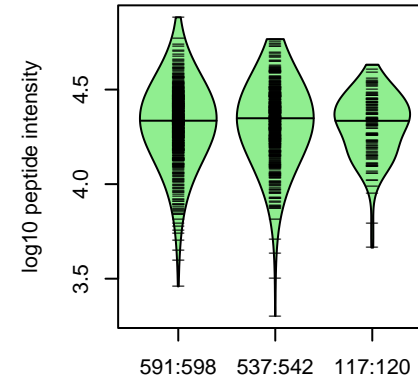

3:186739677:G:A\_A  
p = 0.92, beta = 0.00428, N = 1245

**FNGAPTANFQQDVGTK pc2**  
**P15907**

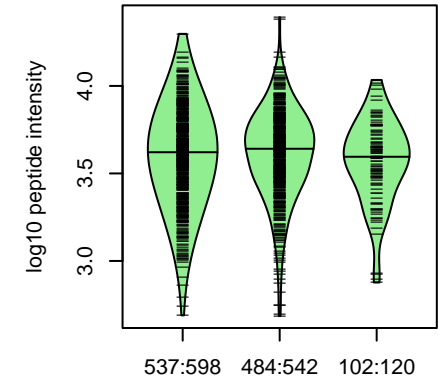

3:186739677:G:A\_A  
p = 0.77, beta = -0.0133, N = 1123

**ST6GAL1 : NP1**  
**P15907**

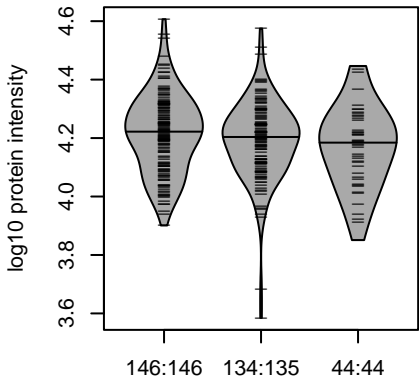

3:186739677:G:A\_A  
p = 0.13, beta = -0.12, N = 324

**LMNSQLVTTEK pc2**  
**P15907**

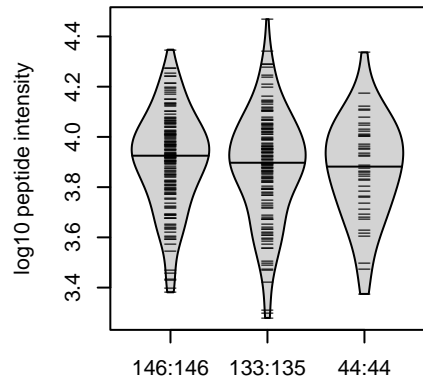

3:186739677:G:A\_A  
p = 0.64, beta = -0.037, N = 323

**CAVVSSAGSLK pc2**  
**P15907**

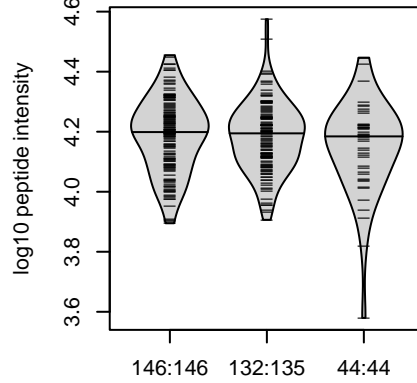

3:186739677:G:A\_A  
p = 0.34, beta = -0.0755, N = 322

**FFDSACTMGAYHPLLYEK pc3**  
**P15907;P15907-2**

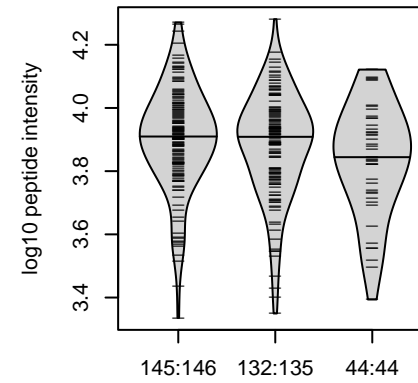

3:186739677:G:A\_A  
p = 0.095, beta = -0.131, N = 321

**FNGAPTANFQQDVGTK pc2**  
**P15907**

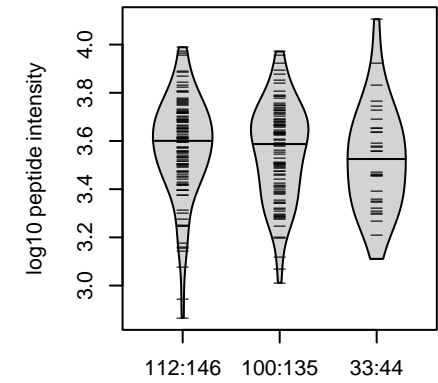

3:186739677:G:A\_A  
p = 0.34, beta = -0.0864, N = 245

Assay Target: ST6GAL1  
Olink UniProt: P15907  
UKB rsID: rs4686837  
Proxy rsID: rs4686837  
UKB SNP: 3:186739677:G:A  
Proxy SNP: 3:186739677:G:A  
UKB log10(p): 152.6  
UKB BETA: -0.17  
-----NA:NA  
1255:1255:1245:1123:658:500:3

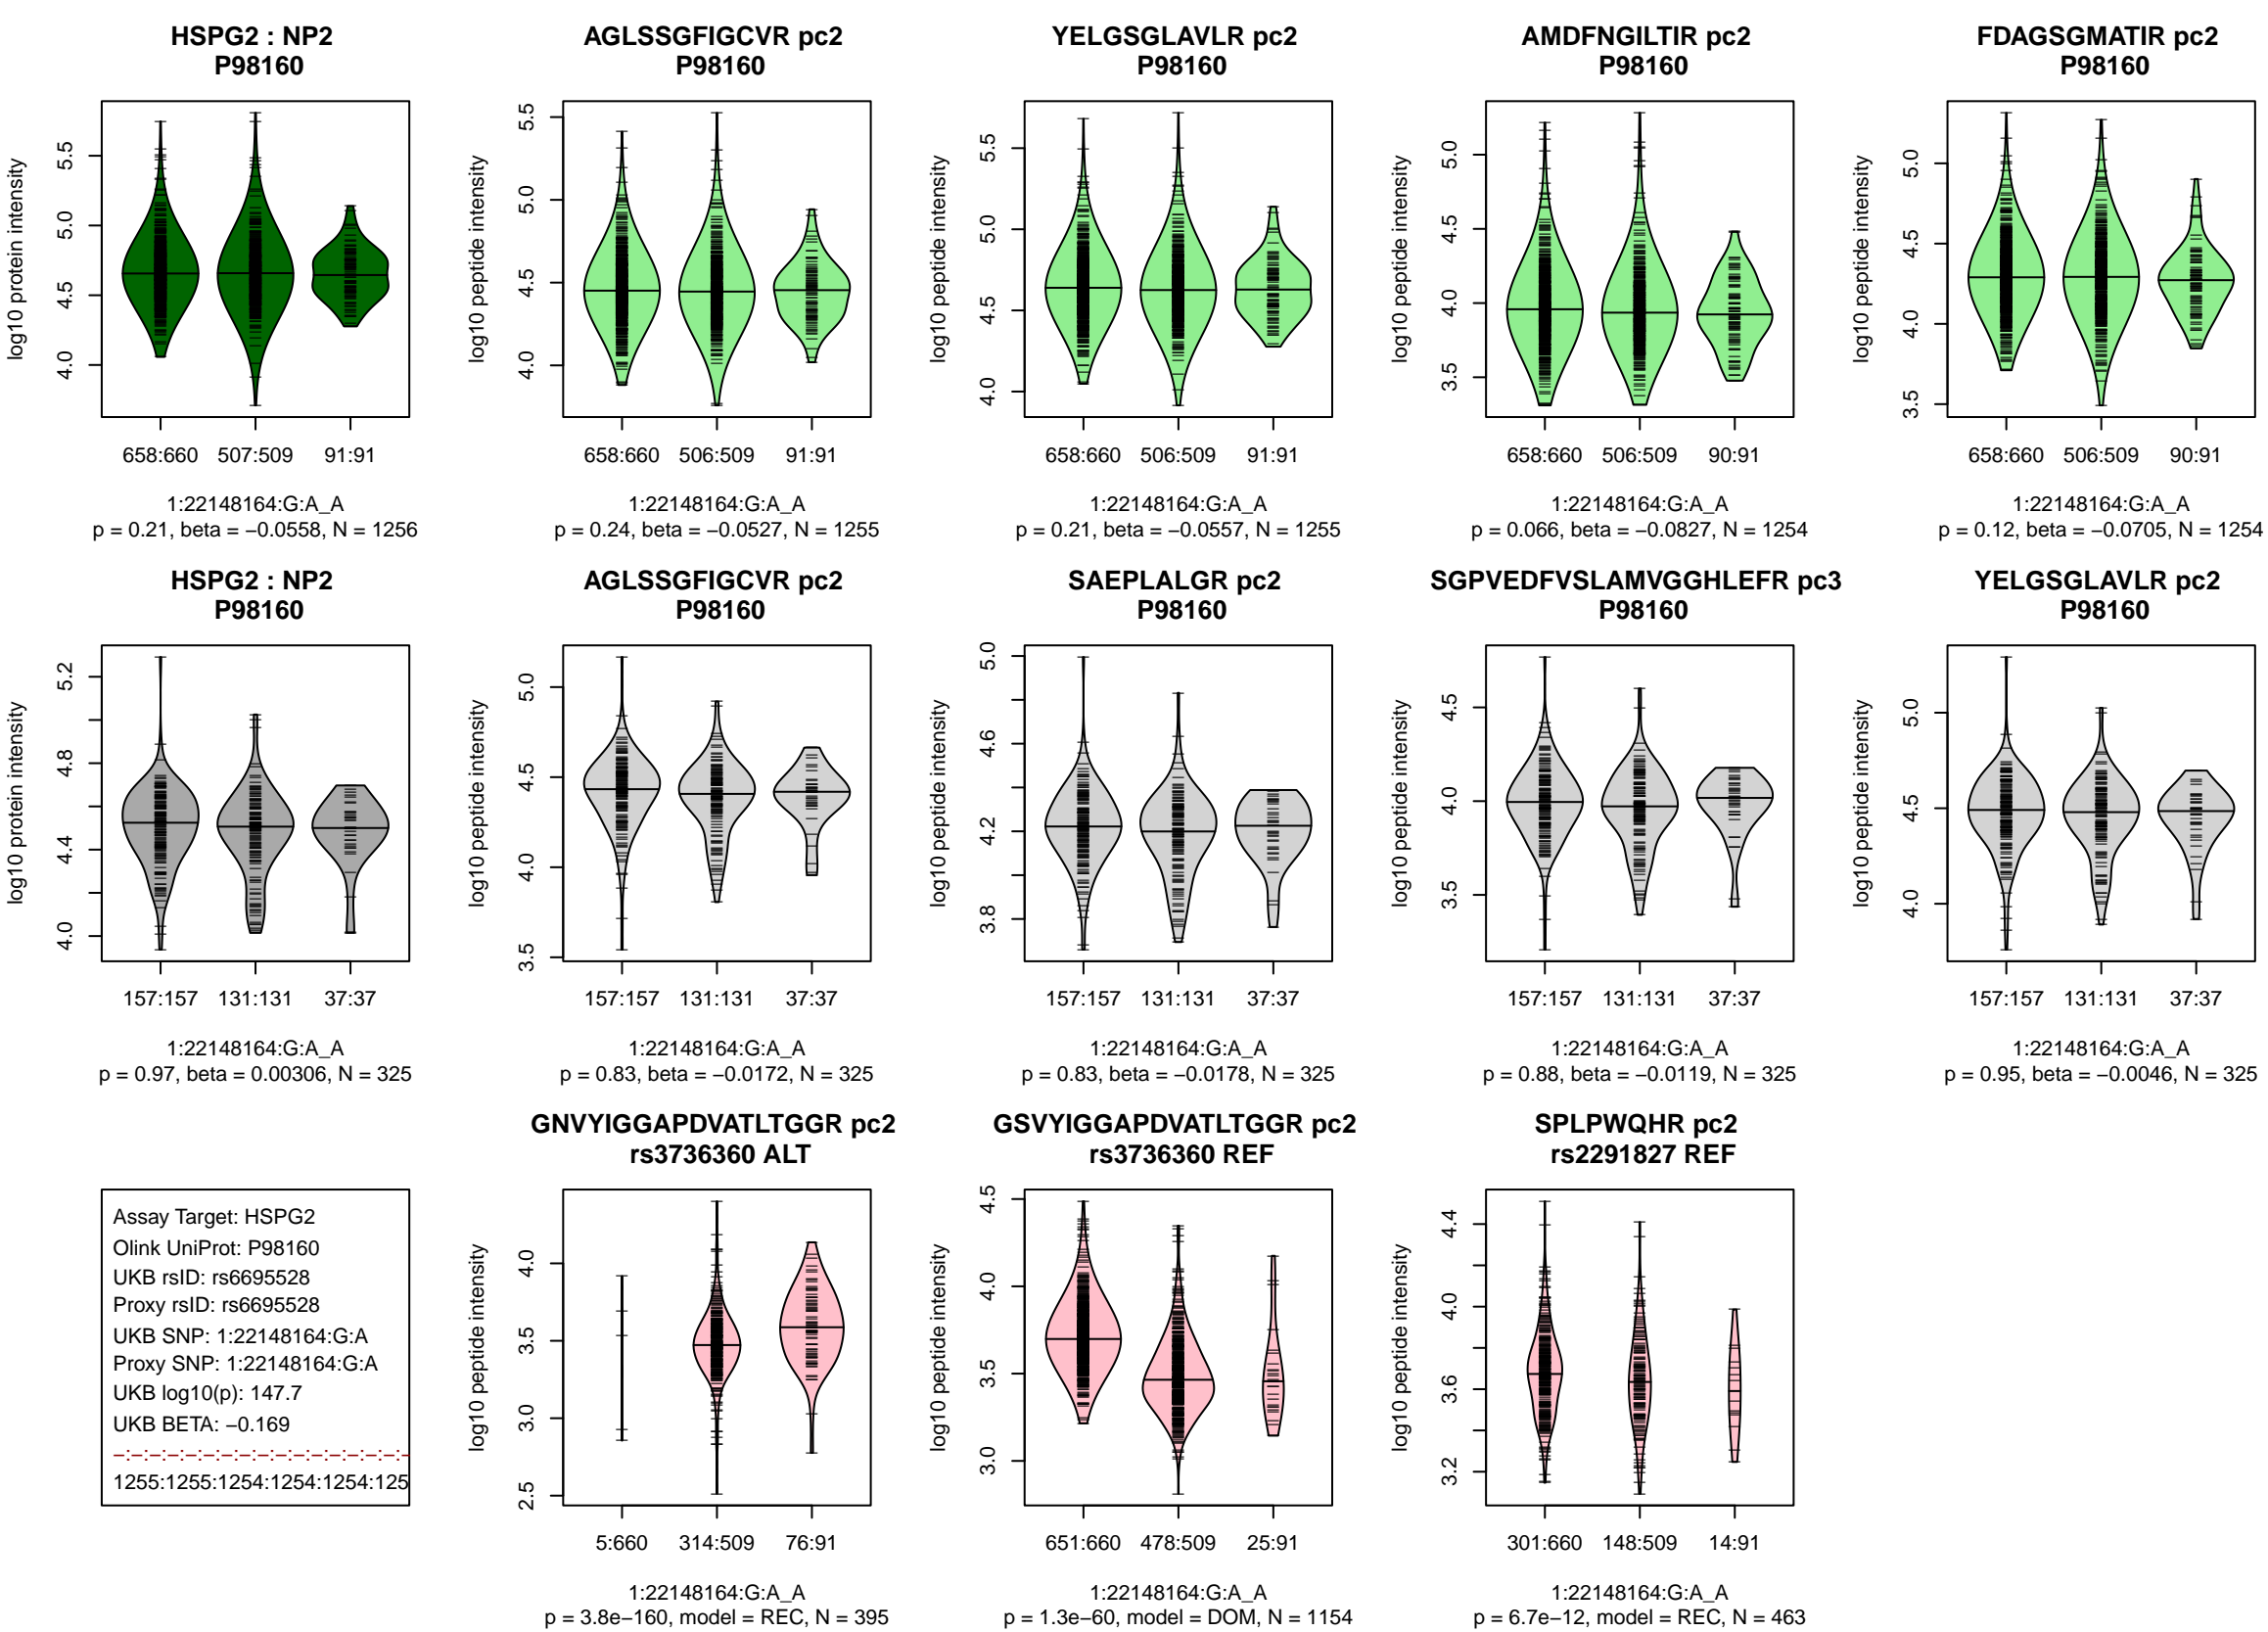

**CAT : NP1  
P04040**

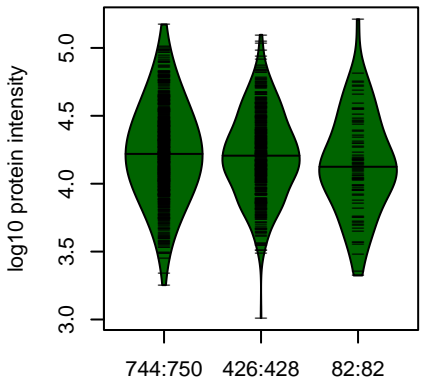

11:34475749:A:T\_T  
p = 0.013, beta = -0.113, N = 1252

**LNVITVGPR pc2  
P04040**

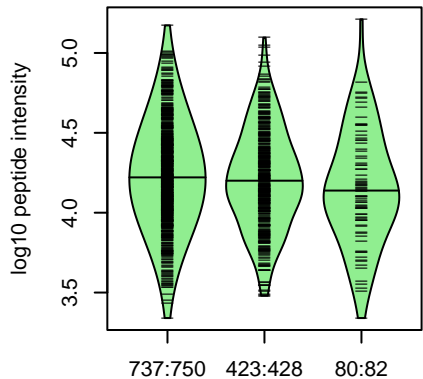

11:34475749:A:T\_T  
p = 0.017, beta = -0.11, N = 1240

**LVNANGEAVYCK pc2  
P04040**

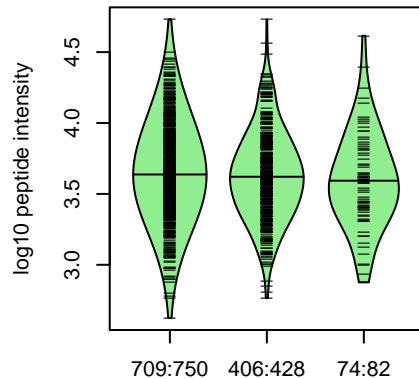

11:34475749:A:T\_T  
p = 0.063, beta = -0.0878, N = 1189

**GAGAFGYFEVTHDITK pc3  
P04040**

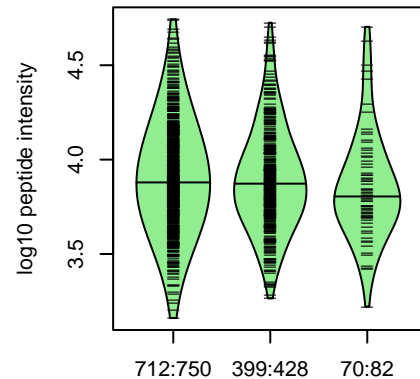

11:34475749:A:T\_T  
p = 0.099, beta = -0.0788, N = 1181

**FSTVAGESGSADTVRDPR pc3  
P04040**

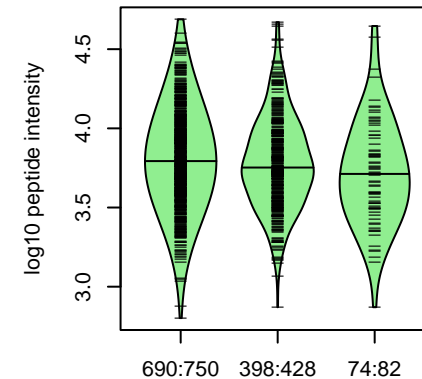

11:34475749:A:T\_T  
p = 0.013, beta = -0.118, N = 1162

**CAT : NP1  
P04040**

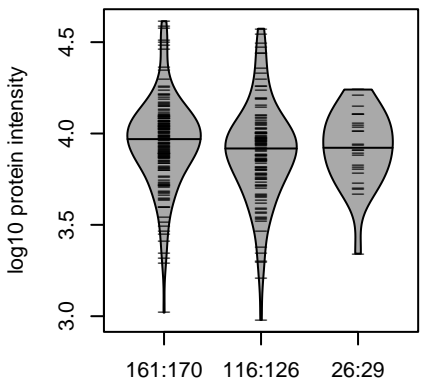

11:34475749:A:T\_T  
p = 0.26, beta = -0.0982, N = 303

**LNVITVGPR pc2  
P04040**

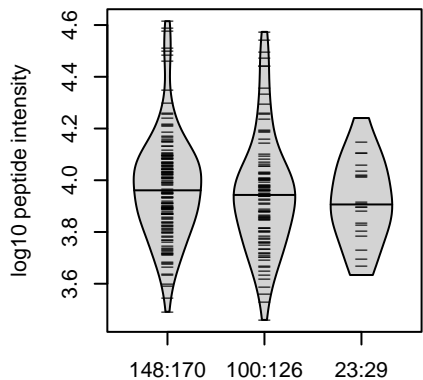

11:34475749:A:T\_T  
p = 0.24, beta = -0.11, N = 271

**GPLLQDVVFTDEMAHFDRE pc4  
P04040**

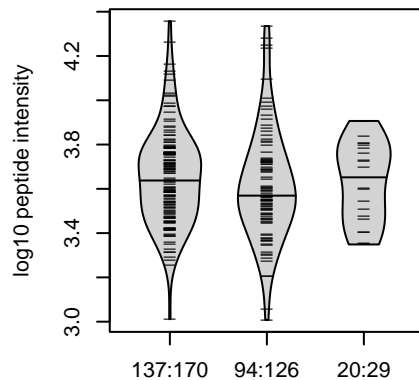

11:34475749:A:T\_T  
p = 0.24, beta = -0.113, N = 251

**GAGAFGYFEVTHDITK pc3  
P04040**

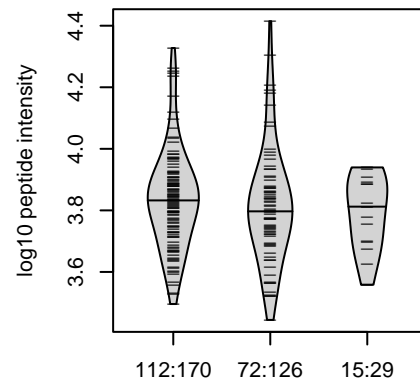

11:34475749:A:T\_T  
p = 0.44, beta = -0.0848, N = 199

**LVNANGEAVYCK pc2  
P04040**

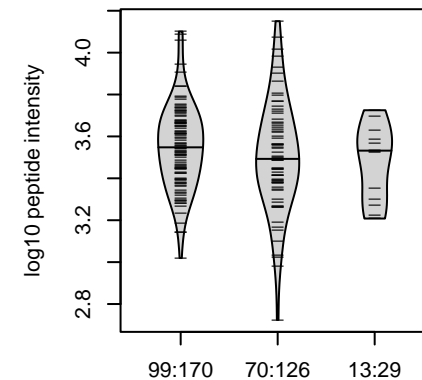

11:34475749:A:T\_T  
p = 0.17, beta = -0.16, N = 182

Assay Target: CAT  
Olink UniProt: P04040  
UKB rsID: rs1408035  
Proxy rsID: rs1408035  
UKB SNP: 11:34475749:A:T  
Proxy SNP: 11:34475749:A:T  
UKB log10(p): 147.6  
UKB BETA: -0.182  
-----  
1240:1189:1181:1162:1087:105

**SERPINB6 : NP1**  
**P35237**

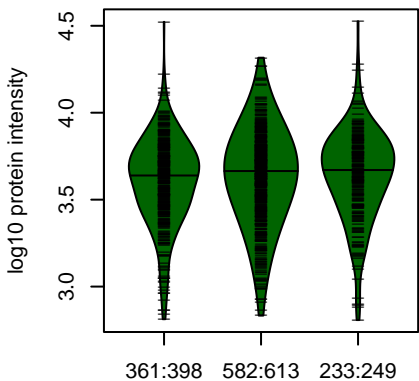

6:2972966:A:G\_G  
p = 0.062, beta = 0.0771, N = 1176

**IAELLSPGSVDPLTR pc2**  
**A024QZX5;A0A087X1N8;A0A2R8YD1**

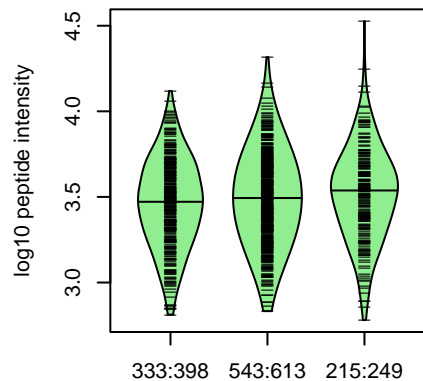

6:2972966:A:G\_G  
p = 0.012, beta = 0.108, N = 1091

**LVLVNAVYFR pc2**

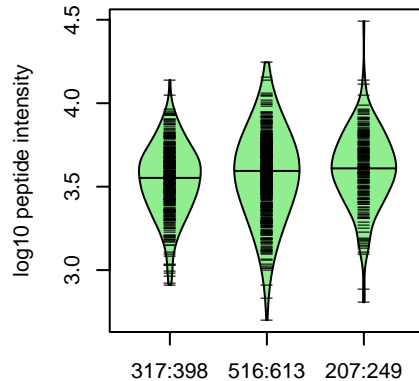

6:2972966:A:G\_G  
p = 0.0013, beta = 0.141, N = 1040

**SCDFLSSFR pc2**

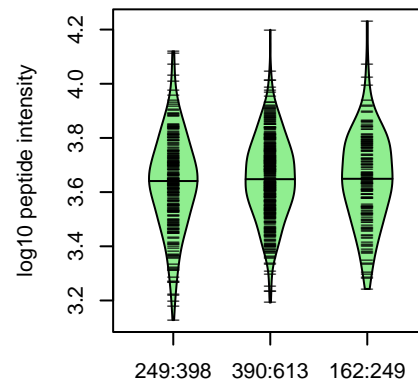

6:2972966:A:G\_G  
p = 0.23, beta = 0.0589, N = 801

**NLGMTDAFELGK pc2**  
**A024QZX5;A0A087X1N8;A0A2R8YD1**

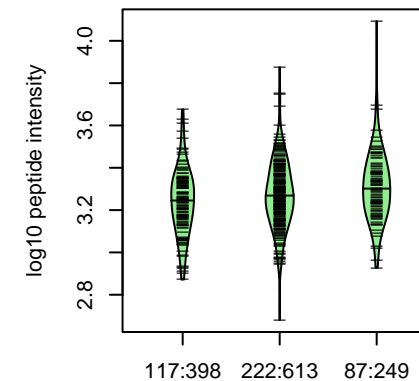

6:2972966:A:G\_G  
p = 0.002, beta = 0.214, N = 426

**SERPINB6 : NP1**

**A0A024QZX5;A0A087X1N8;P35237**

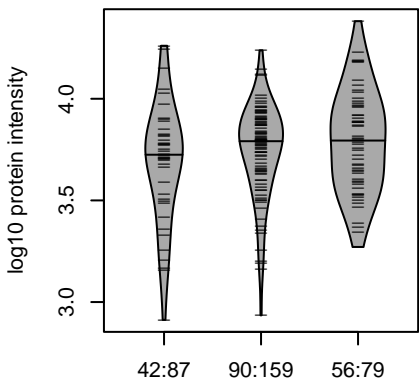

6:2972966:A:G\_G  
p = 0.068, beta = 0.182, N = 188

**LVLVNAVYFR pc2**

**A0A024QZX5;A0A087X1N8;A0A2R8YD1**

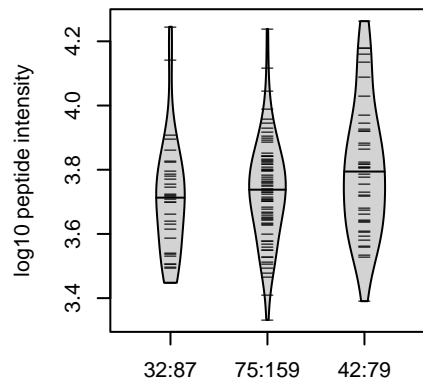

6:2972966:A:G\_G  
p = 0.063, beta = 0.212, N = 149

**IAELLSPGSVDPLTR pc2**

**A0A024QZX5;A0A087X1N8;A0A2R8YD1**

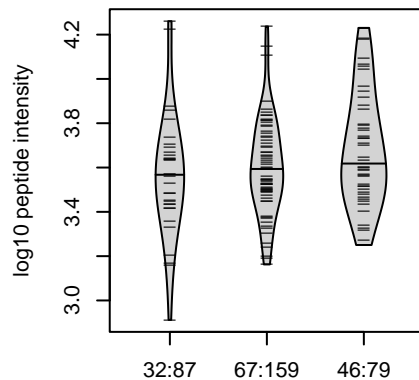

6:2972966:A:G\_G  
p = 0.26, beta = 0.126, N = 145

**SCDFLSSFR pc2**

**A0A024QZX5;A0A087X1N8;A0A2R8YD1**

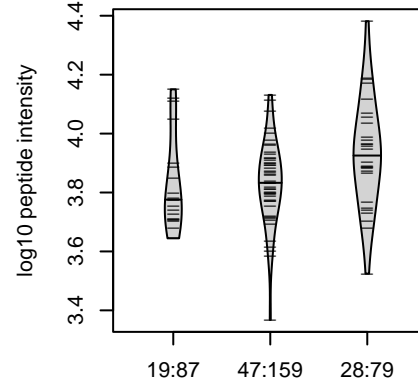

6:2972966:A:G\_G  
p = 0.1, beta = 0.232, N = 94

**NLGMTDAFELGK pc2**

**A0A024QZX5;A0A087X1N8;A0A2R8YD1**

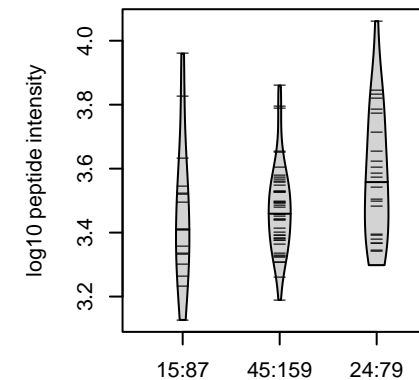

6:2972966:A:G\_G  
p = 0.047, beta = 0.308, N = 84

Assay Target: SERPINB6  
Olink UniProt: P35237  
UKB rsID: rs9405601  
Proxy rsID: rs7775515  
UKB SNP: 6:2972897:G:A  
Proxy SNP: 6:2972966:A:G  
UKB log10(p): 147.3  
UKB BETA: 0.159  
-----\*-----  
1091:1040:801:426:325:255:244

**AGER : NP3**  
**Q15109-3**

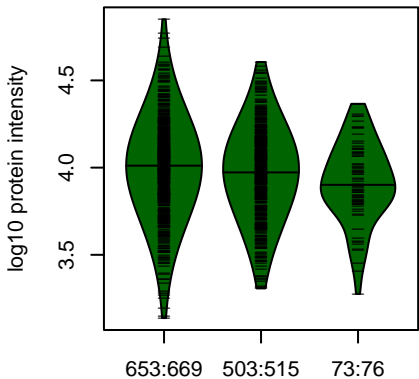

6:32155581:A:G\_G  
p = 0.025, beta = -0.105, N = 1229

**IGEPLVLK pc2**

**Q15109-2;Q15109-3;Q15109-4;Q151A982;Q15109-3;Q15109-4;Q15109-6;**

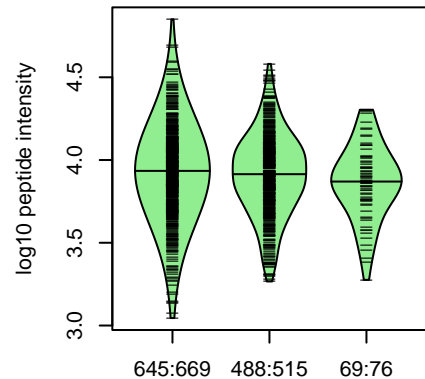

6:32155581:A:G\_G  
p = 0.13, beta = -0.0722, N = 1202

**VLSPQGGGPWDSVAR pc2**

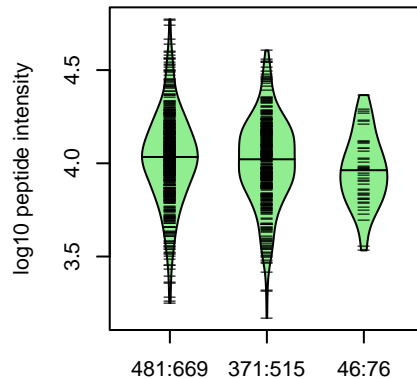

6:32155581:A:G\_G  
p = 0.12, beta = -0.088, N = 898

**GGDPRPTFSCSFSPGLPR pc3**

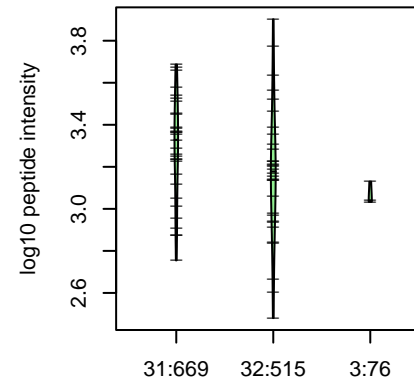

6:32155581:A:G\_G  
p = 0.0054, beta = -0.554, N = 66

**VGTCVSEGSYPAGTLSWHLDGK pc3**  
**A8MS87;Q15109-2;Q15109-3;Q151**

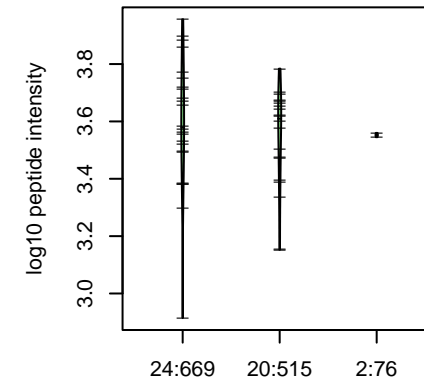

6:32155581:A:G\_G  
p = 0.36, beta = -0.222, N = 46

**AGER : NP3**  
**Q15109-3;Q15109-4**

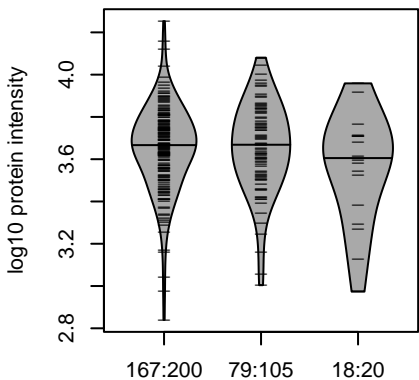

6:32155581:A:G\_G  
p = 0.82, beta = -0.0228, N = 264

**IGEPLVLK pc2**

**Q15109-2;Q15109-3;Q15109-4;Q151A982;Q15109-3;Q15109-4;Q15109-6;**

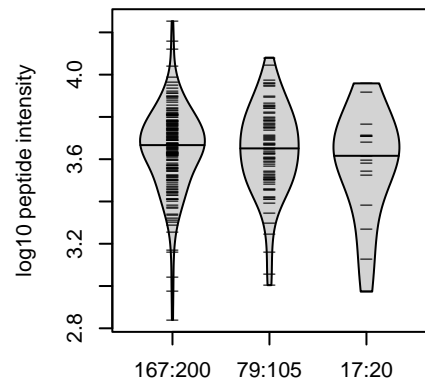

6:32155581:A:G\_G  
p = 0.86, beta = -0.0176, N = 263

**VLSPQGGGPWDSVAR pc2**

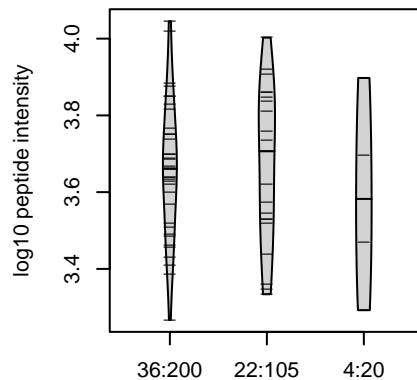

6:32155581:A:G\_G  
p = 0.88, beta = 0.0311, N = 62

Assay Target: AGER  
Olink UniProt: Q15109  
UKB rsID: rs204993  
Proxy rsID: rs204993  
UKB SNP: 6:32155581:A:G  
Proxy SNP: 6:32155581:A:G  
UKB log10(p): 142.4  
UKB BETA: -0.16  
-.-\*:--  
1202:898:66:46



**COL18A1 : NP5**  
P39060;P39060-1;P39060-2

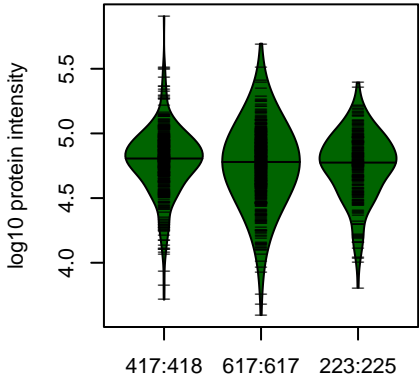

21:46902273:A:G\_G  
 $p = 0.026$ ,  $\beta = -0.0896$ ,  $N = 1257$

**FQGVIAELK pc2**  
P39060;P39060-1;P39060-2

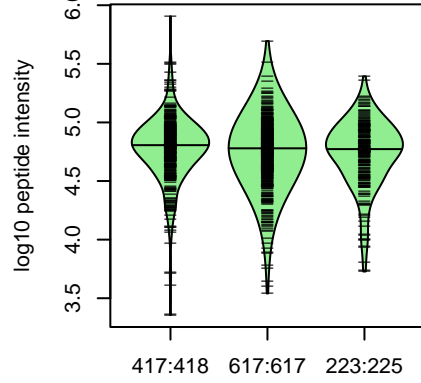

21:46902273:A:G\_G  
 $p = 0.025$ ,  $\beta = -0.0903$ ,  $N = 1257$

**GADFQCFQQR pc2**  
P39060;P39060-1;P39060-2

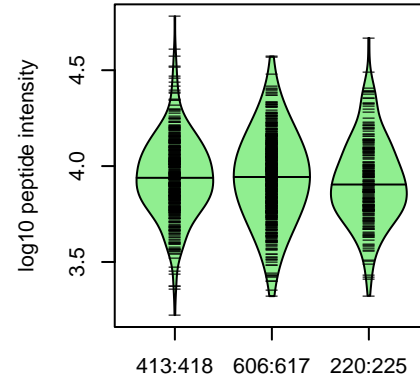

21:46902273:A:G\_G  
 $p = 0.11$ ,  $\beta = -0.064$ ,  $N = 1239$

**IFSFQDGK pc2**  
P39060;P39060-1;P39060-2

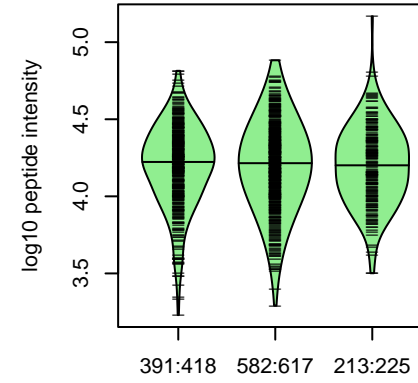

21:46902273:A:G\_G  
 $p = 0.67$ ,  $\beta = -0.0177$ ,  $N = 1186$

**GLELEPGAGLFVAQAGGADPK pc2**  
P39060;P39060-1;P39060-2

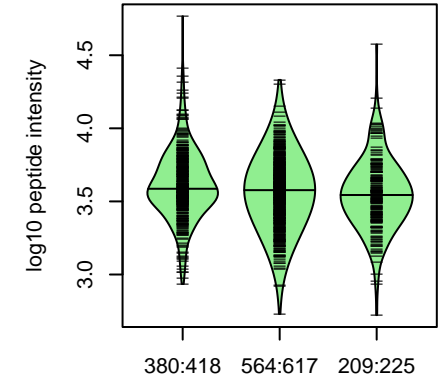

21:46902273:A:G\_G  
 $p = 0.00018$ ,  $\beta = -0.157$ ,  $N = 1153$

**COL18A1 : NP5**  
P39060;P39060-1;P39060-2

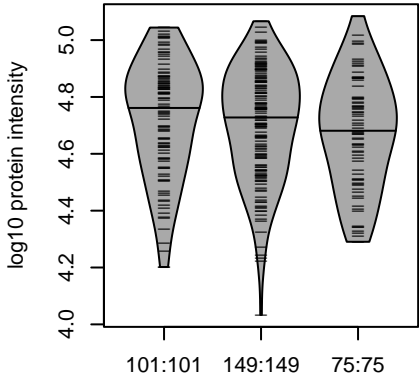

21:46902273:A:G\_G  
 $p = 0.13$ ,  $\beta = -0.113$ ,  $N = 325$

**FQGVIAELK pc2**  
P39060;P39060-1;P39060-2

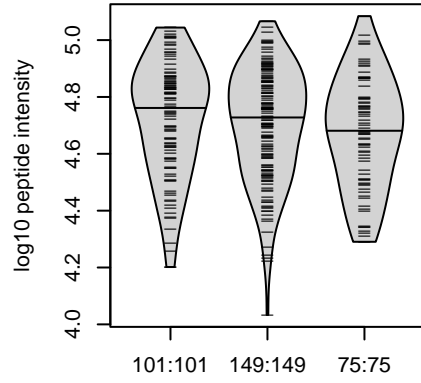

21:46902273:A:G\_G  
 $p = 0.13$ ,  $\beta = -0.113$ ,  $N = 325$

**GADFQCFQQR pc2**  
P39060;P39060-1;P39060-2

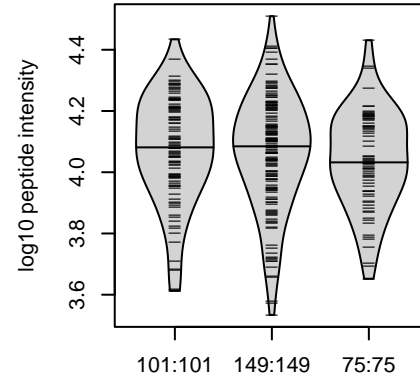

21:46902273:A:G\_G  
 $p = 0.15$ ,  $\beta = -0.108$ ,  $N = 325$

**TEAPSATGQASSLLGGR pc2**  
P39060;P39060-1;P39060-2

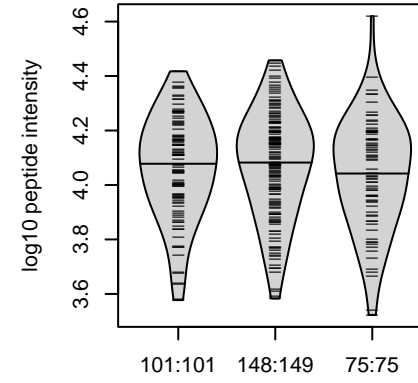

21:46902273:A:G\_G  
 $p = 0.61$ ,  $\beta = -0.0378$ ,  $N = 324$

**ELLREETGAALK pc2**  
P39060;P39060-1;P39060-2

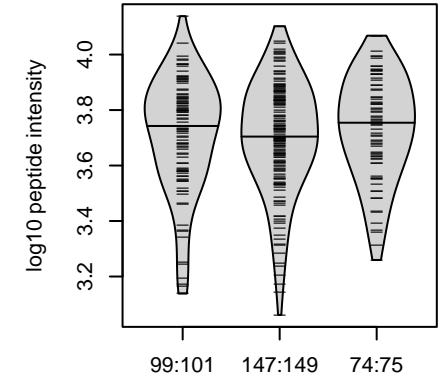

21:46902273:A:G\_G  
 $p = 0.82$ ,  $\beta = 0.0167$ ,  $N = 320$

Assay Target: COL18A1  
Olink UniProt: P39060  
UKB rsID: rs36182034  
Proxy rsID: rs2236468  
UKB SNP: 21:46903982:T:C  
Proxy SNP: 21:46902273:A:G  
UKB log10(p): 140.7  
UKB BETA: -0.153  
-----\*-----  
1257:1239:1186:1153:1128:107



**CHMP6 : NP1  
Q96FZ7**

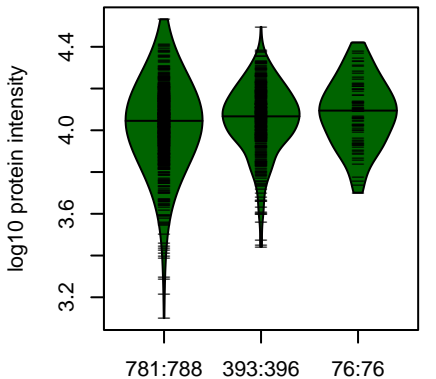

17:78971176:A:G\_G  
p = 5.7e-05, beta = 0.186, N = 1250

**MHQVMSIEEVER pc3  
Q96FZ7**

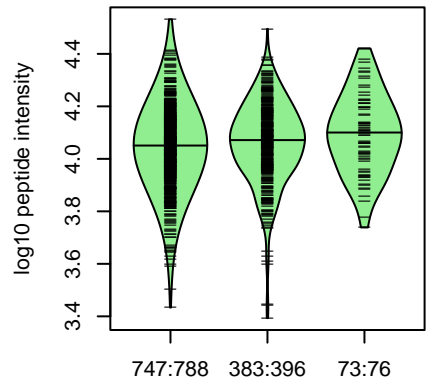

17:78971176:A:G\_G  
p = 0.00018, beta = 0.177, N = 1203

**VMEGLQFGNECLNK pc2  
Q96FZ7**

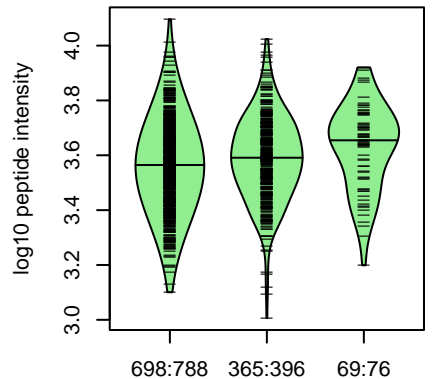

17:78971176:A:G\_G  
p = 9.9e-06, beta = 0.214, N = 1132

**YQEQLLDR pc2  
Q96FZ7**

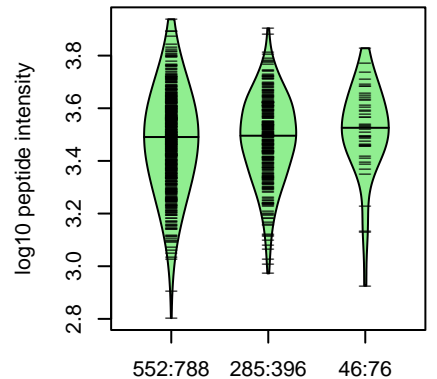

17:78971176:A:G\_G  
p = 0.15, beta = 0.0818, N = 883

**ILDETQEA VEYQR pc2  
Q96FZ7**

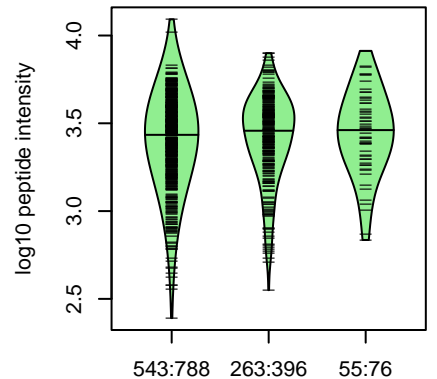

17:78971176:A:G\_G  
p = 0.063, beta = 0.103, N = 861

**CHMP6 : NP1  
Q96FZ7**

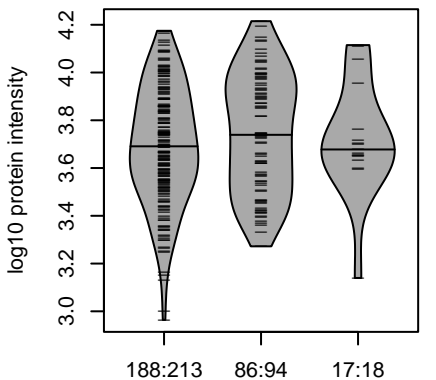

17:78971176:A:G\_G  
p = 0.22, beta = 0.119, N = 291

**VMEGLQFGNECLNK pc2  
Q96FZ7**

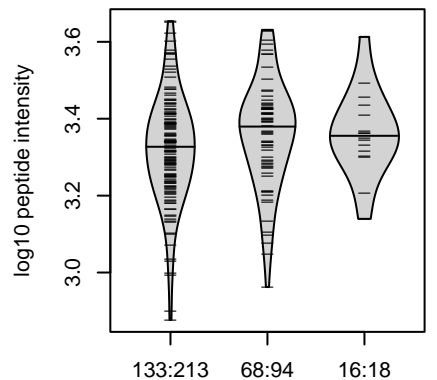

17:78971176:A:G\_G  
p = 0.061, beta = 0.198, N = 217

**ILDETQEA VEYQR pc2  
Q96FZ7**

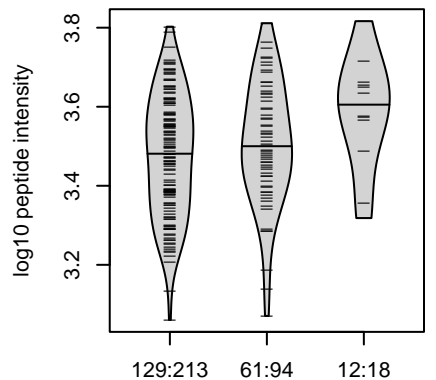

17:78971176:A:G\_G  
p = 0.0072, beta = 0.306, N = 202

**IPENVPVK pc2  
Q96FZ7**

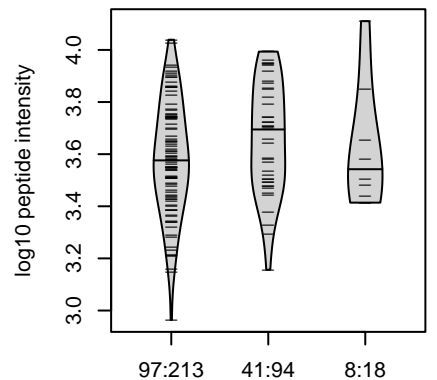

17:78971176:A:G\_G  
p = 0.22, beta = 0.167, N = 146

**MHQVMSIEEVER pc3  
Q96FZ7**

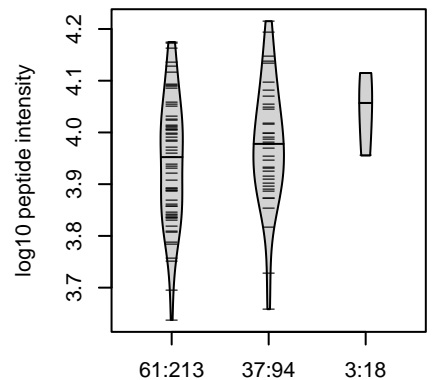

17:78971176:A:G\_G  
p = 0.062, beta = 0.325, N = 101

Assay Target: CHMP6  
Olink UniProt: Q96FZ7  
UKB rsID: rs9989475  
Proxy rsID: rs9989475  
UKB SNP: 17:78971176:A:G  
Proxy SNP: 17:78971176:A:G  
UKB log10(p): 139.3  
UKB BETA: 0.201  
\*.\*-:-:-:-  
1203:1132:883:861:564:118

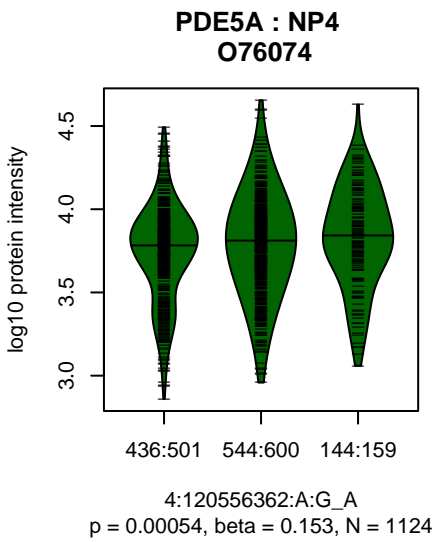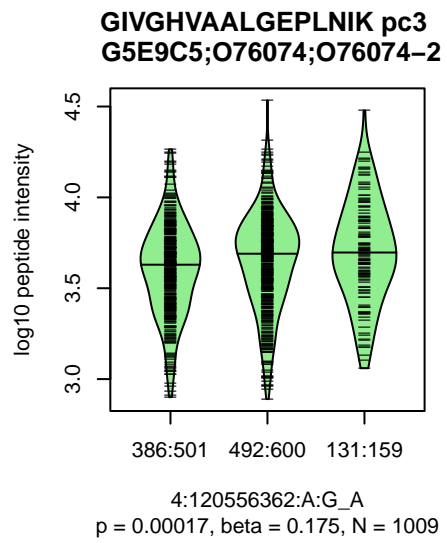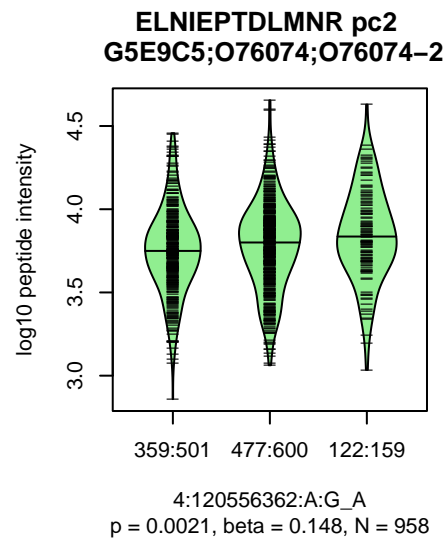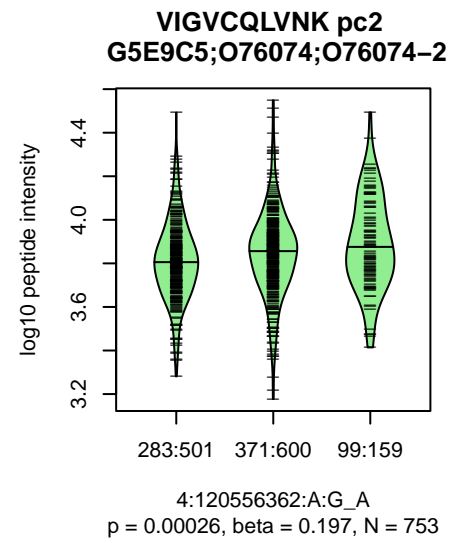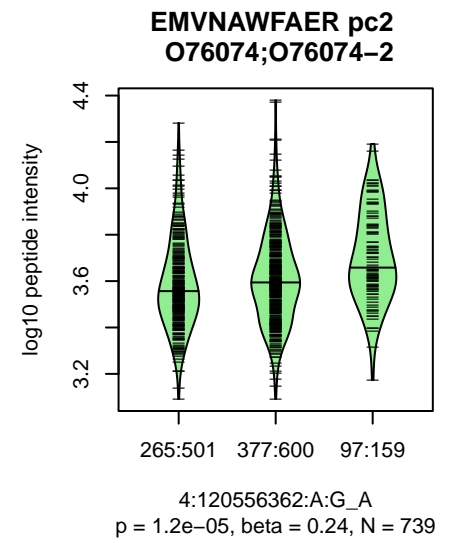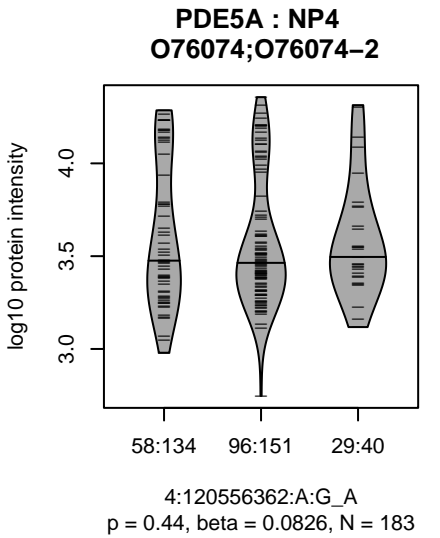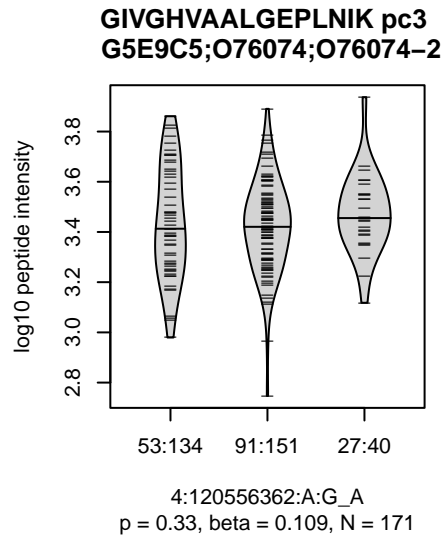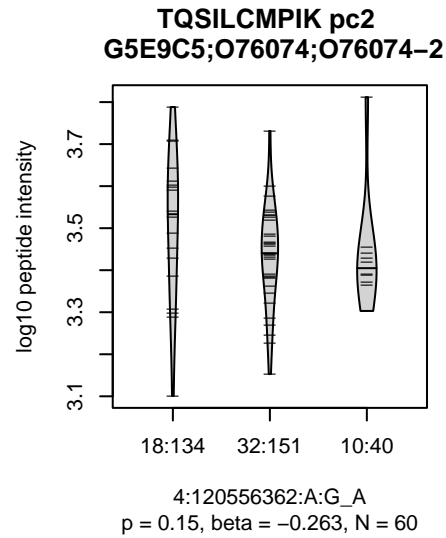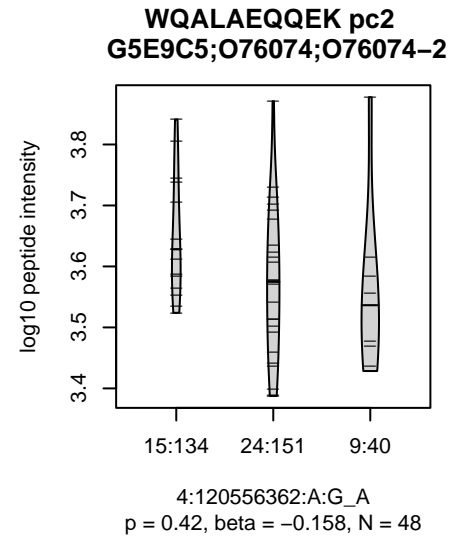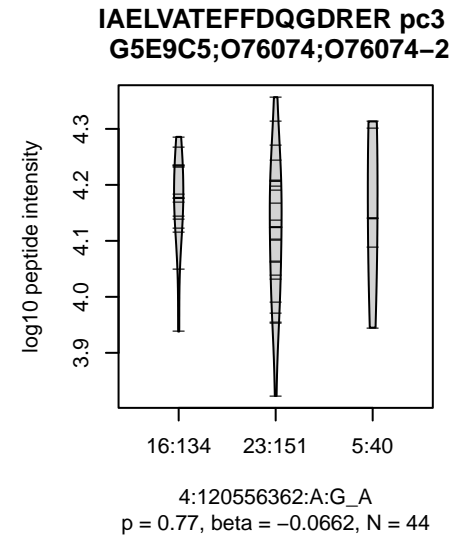

Assay Target: PDE5A  
Olink UniProt: O76074  
UKB rsID: rs58583086  
Proxy rsID: rs58583086  
UKB SNP: 4:120556362:A:G  
Proxy SNP: 4:120556362:A:G  
UKB log10(p): 137.6  
UKB BETA: -0.159  
\*\*\*\*\*  
1009:958:753:739:728:709:707:

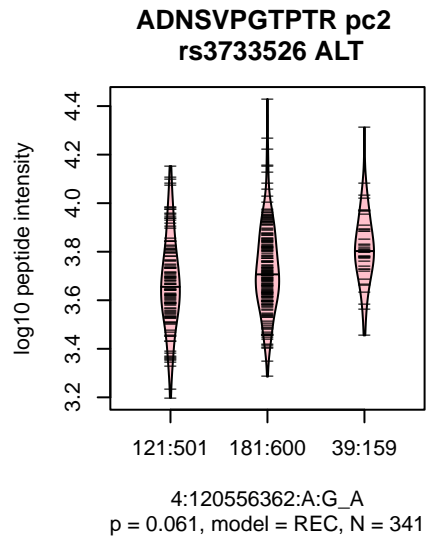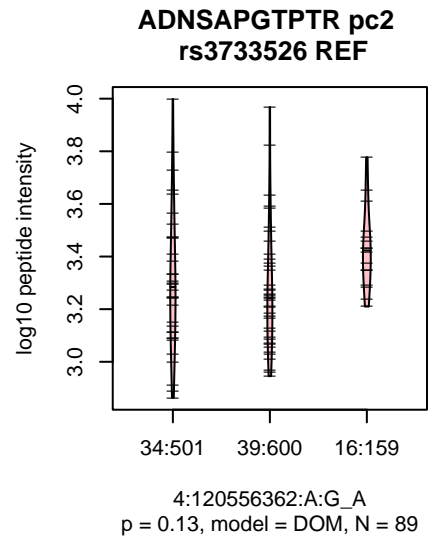

**HPCAL1 : NP2**  
**P37235**

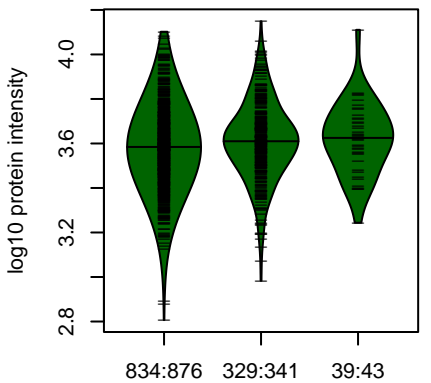

2:10475599:A:C\_C  
p = 0.0058, beta = 0.147, N = 1202

**LSLEEFIR pc2**  
**P84074;P37235;P61601**

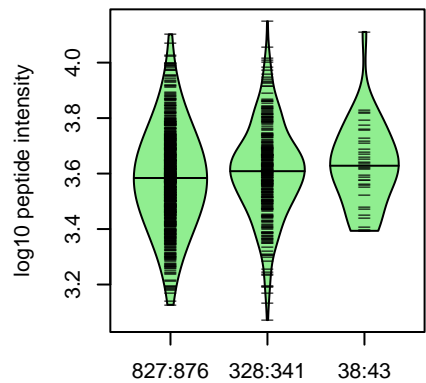

2:10475599:A:C\_C  
p = 0.0045, beta = 0.153, N = 1193

**EFIIALSVTSR pc2**  
**E5RGA9;E9PC71;P84074;P37235;P61**

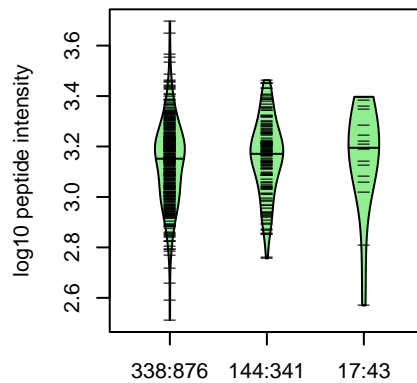

2:10475599:A:C\_C  
p = 0.039, beta = 0.167, N = 499

**LRPEVLQDLR pc3**  
**E9PC71;P37235**

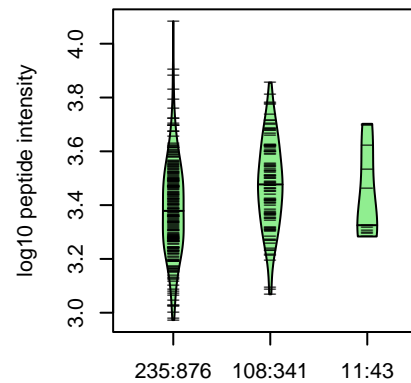

2:10475599:A:C\_C  
p = 0.00014, beta = 0.365, N = 354

**IYANFFPYGDASK pc2**  
**E9PC71;P84074;P37235**

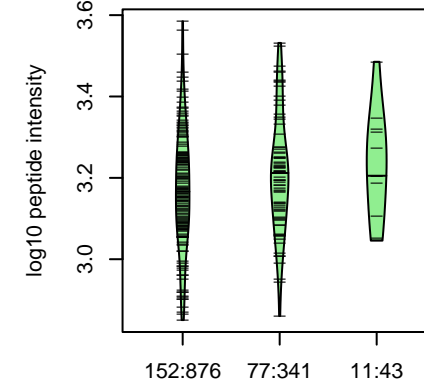

2:10475599:A:C\_C  
p = 0.091, beta = 0.185, N = 240

**HPCAL1 : NP2**  
**P37235**

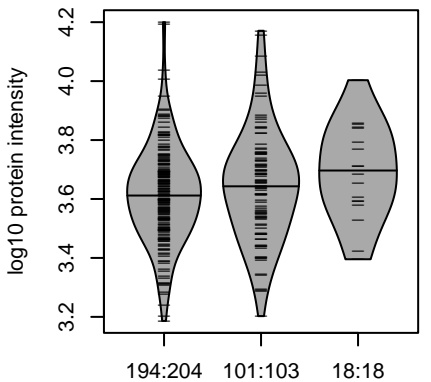

2:10475599:A:C\_C  
p = 0.065, beta = 0.171, N = 313

**LSLEEFIR pc2**  
**P84074;P37235;P61601**

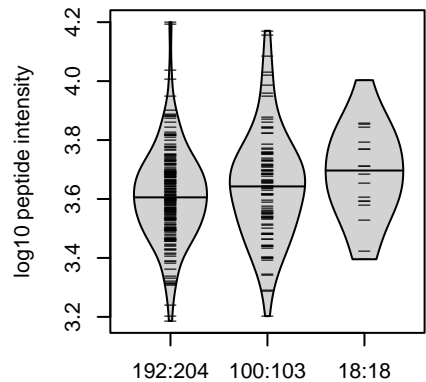

2:10475599:A:C\_C  
p = 0.034, beta = 0.197, N = 310

**LRPEVLQDLR pc3**  
**E9PC71;P37235**

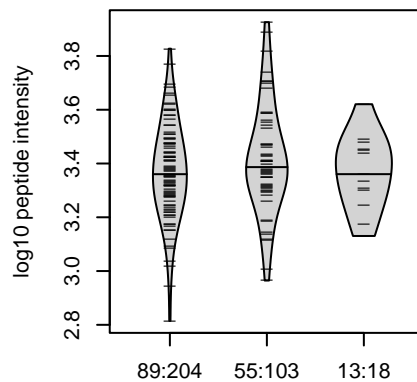

2:10475599:A:C\_C  
p = 0.27, beta = 0.134, N = 157

**DCPTGHLTVDEFKK pc3**  
**E9PC71;P37235**

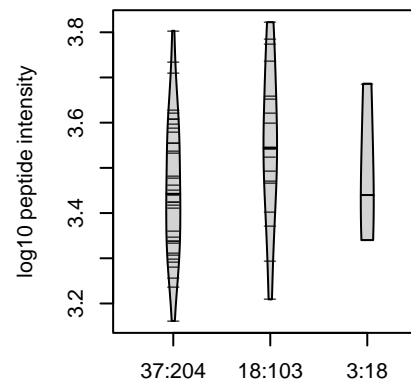

2:10475599:A:C\_C  
p = 0.15, beta = 0.308, N = 58

**EFIIALSVTSR pc2**  
**E5RGA9;E9PC71;P84074;P37235;P61**

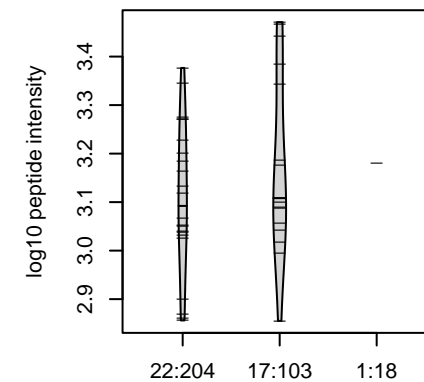

2:10475599:A:C\_C  
p = 0.13, beta = 0.406, N = 40

Assay Target: HPCAL1  
Olink UniProt: P37235  
UKB rsID: rs375285744  
Proxy rsID: rs11891604  
UKB SNP: 2:10476228:T:C  
Proxy SNP: 2:10475599:A:C  
UKB log10(p): 137  
UKB BETA: 0.213  
\*:-\*:--:-:NA  
1193:499:354:240:130:95:2



**CTSL : NP5  
P07711**

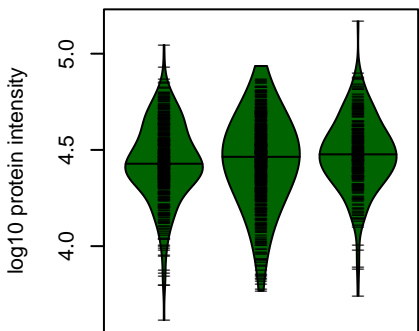

415:415 574:575 268:270

9:90349202:G:C\_G  
p = 0.079, beta = 0.0679, N = 1257

**VFQEPLFYEAPR pc2  
2V5M3;A0A7I2YQA2;A0A7I2YQB5;P0A0A7I2V484;A0A7I2V5M3;P07711-3;P1A0A7I2V484;A0A7I2V5M3;P07711-3;P1A0A7I2V5M3;A0A7I2YQA2;P07711-3**

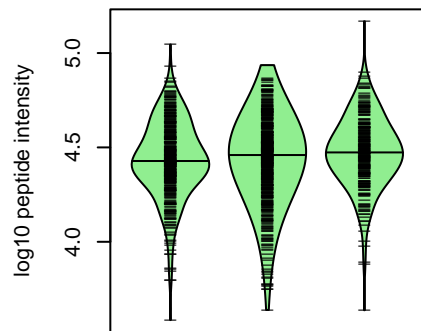

415:415 573:575 268:270

9:90349202:G:C\_G  
p = 0.1, beta = 0.0631, N = 1256

**NSWGEEWGMGGYVK pc2**

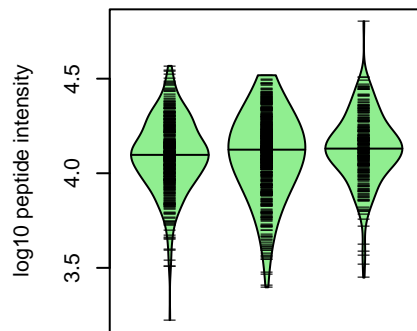

415:415 570:575 268:270

9:90349202:G:C\_G  
p = 0.13, beta = 0.0585, N = 1253

**NHCGIASAASYPTV pc2**

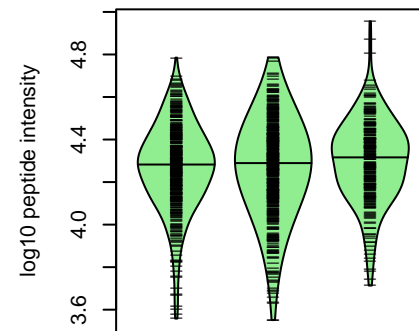

412:415 568:575 268:270

9:90349202:G:C\_G  
p = 0.22, beta = 0.0474, N = 1248

**AVATVGPISVAIDAGHESFLFYK pc2**

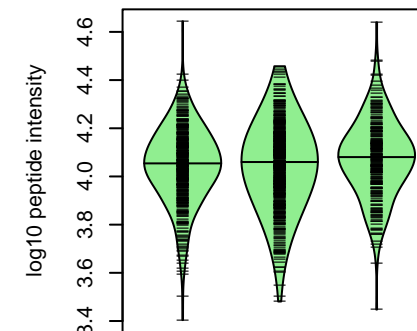

412:415 566:575 267:270

9:90349202:G:C\_G  
p = 0.085, beta = 0.0666, N = 1245

**CTSL : NP5  
A0A7I2V5M3;P07711**

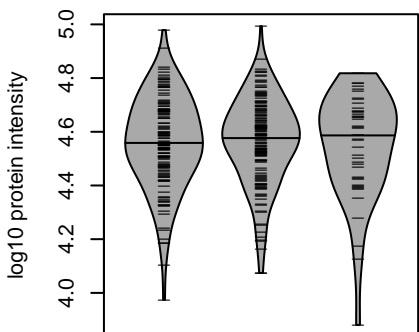

132:132 149:149 44:44

9:90349202:G:C\_G  
p = 0.58, beta = 0.0444, N = 325

**NHCGIASAASYPTV pc2  
A0A7I2V484;A0A7I2V5M3;P07711-3;P1A0A7I2V484;A0A7I2V5M3;P07711-3;P1A0A7I2V5M3;A0A7I2YQA2;A0A7I2YQB5;P0A0A7I2V5M3;A0A7I2V601;A0A7I2YQA2**

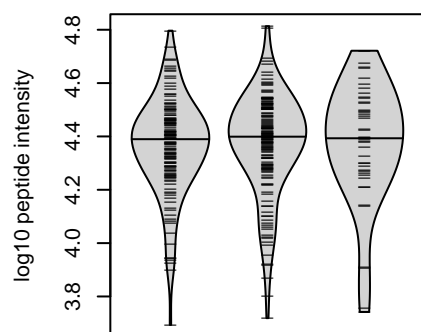

132:132 149:149 44:44

9:90349202:G:C\_G  
p = 0.13, beta = 0.123, N = 325

**NSWGEEWGMGGYVK pc2**

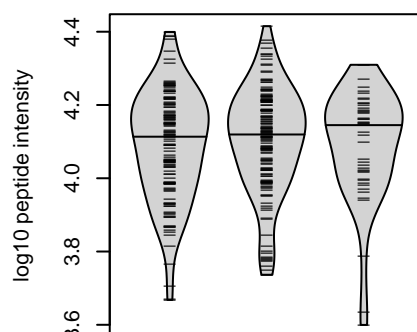

132:132 149:149 44:44

9:90349202:G:C\_G  
p = 0.33, beta = 0.0778, N = 325

**VFQEPLFYEAPR pc2**

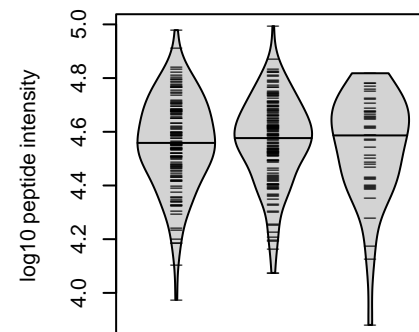

132:132 149:149 44:44

9:90349202:G:C\_G  
p = 0.56, beta = 0.0465, N = 325

**LYGMNEEGWR pc2**

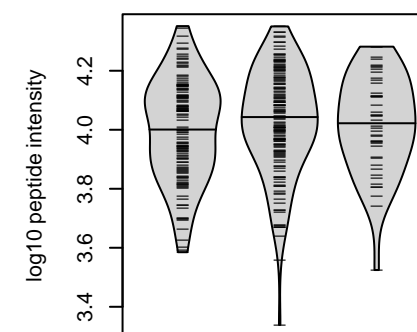

129:132 146:149 44:44

9:90349202:G:C\_G  
p = 0.08, beta = 0.141, N = 319

Assay Target: CTSL  
Olink UniProt: P07711  
UKB rsID: rs868561  
Proxy rsID: rs868561  
UKB SNP: 9:90349202:G:C  
Proxy SNP: 9:90349202:G:C  
UKB log10(p): 133  
UKB BETA: -0.145  
-----NA  
1256:1253:1248:1245:1227:106

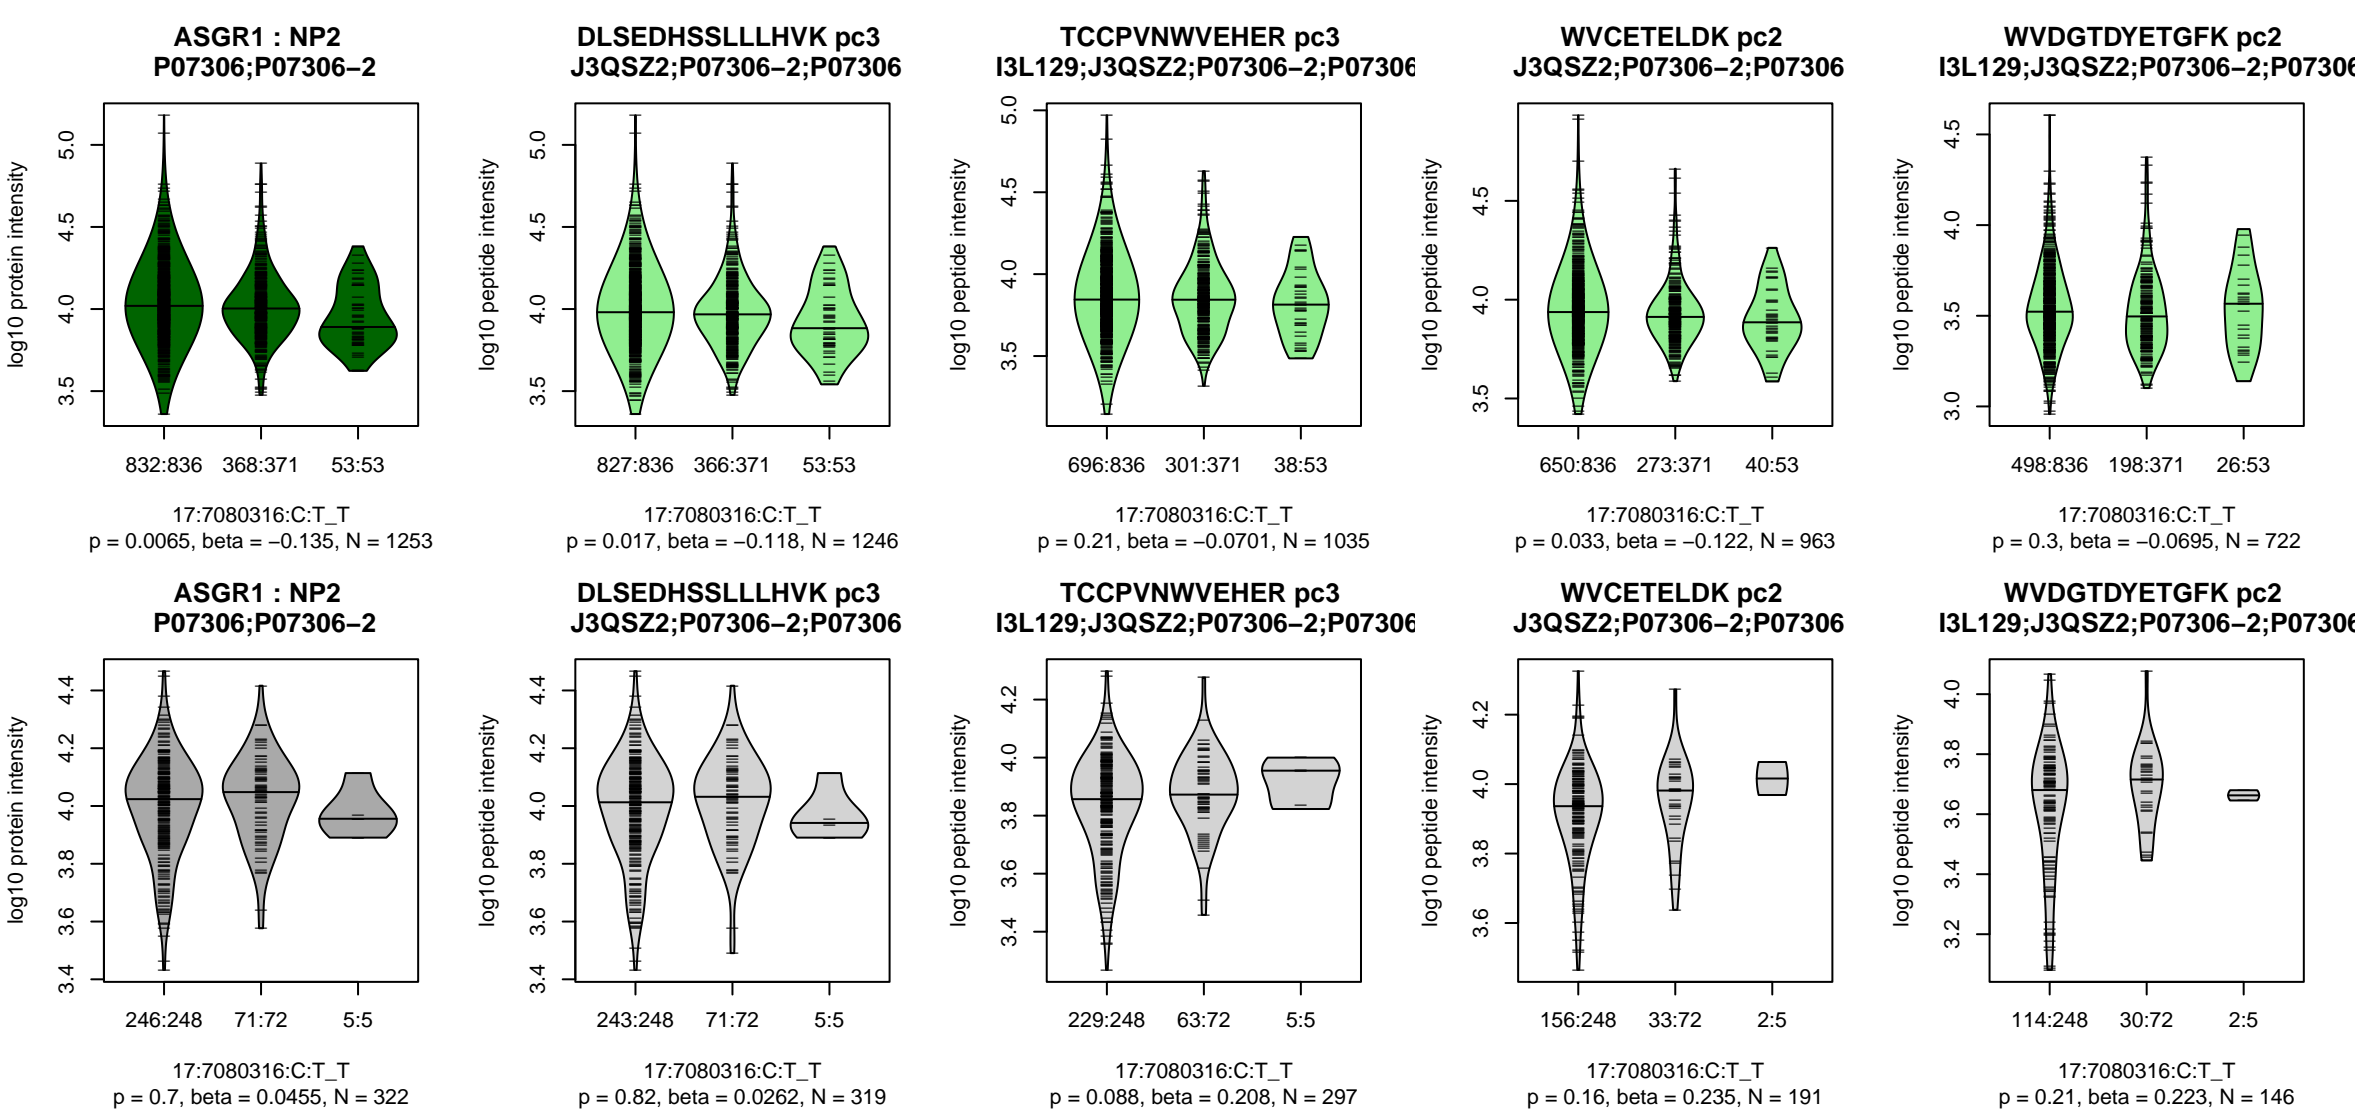

Assay Target: ASGR1  
 Olink UniProt: P07306  
 UKB rsID: rs55714927  
 Proxy rsID: rs55714927  
 UKB SNP: 17:7080316:C:T  
 Proxy SNP: 17:7080316:C:T  
 UKB log10(p): 132.7  
 UKB BETA: -0.188  
 -----\*-----  
 1246:1035:963:722:584:523:472

**CFD : NP4  
P00746**

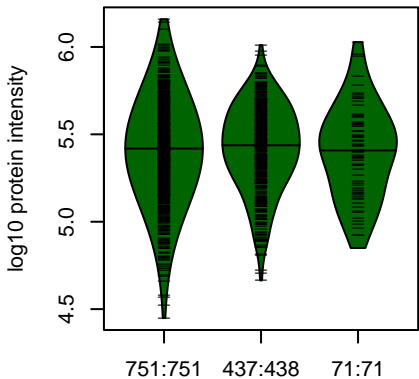

19:859368:G:T\_T  
p = 0.65, beta = 0.0213, N = 1259

**DVAPGTLCDVAGWGIVNHAGR pc3  
K7ERG9;P00746**

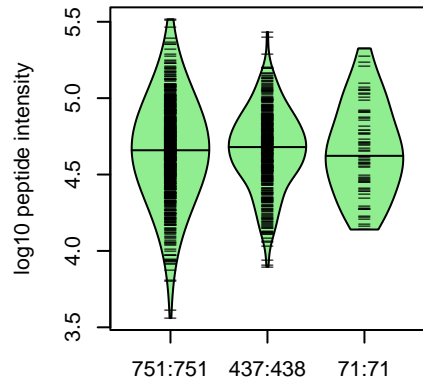

19:859368:G:T\_T  
p = 0.86, beta = 0.00814, N = 1259

**RPDSLQHVLLPVLDR pc3  
K7ERG9;P00746**

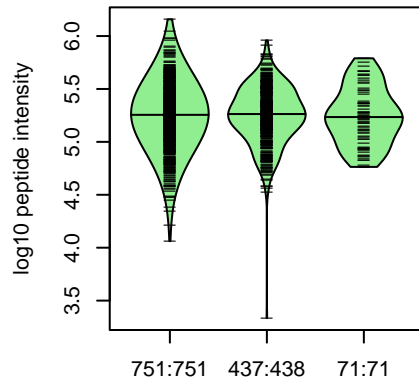

19:859368:G:T\_T  
p = 0.96, beta = 0.00233, N = 1259

**VDRDVAPGTLCDVAGWGIVNHAGR p  
K7ERG9;P00746**

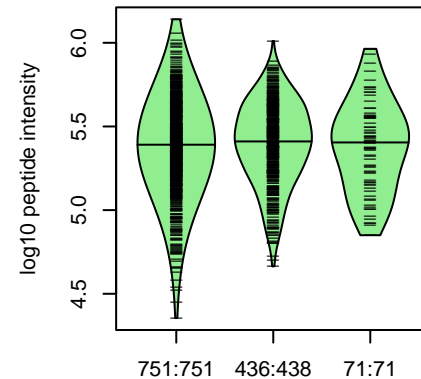

19:859368:G:T\_T  
p = 0.59, beta = 0.0254, N = 1258

**VQVLLGAHSLSQPEPSK pc2  
K7ERG9;P00746**

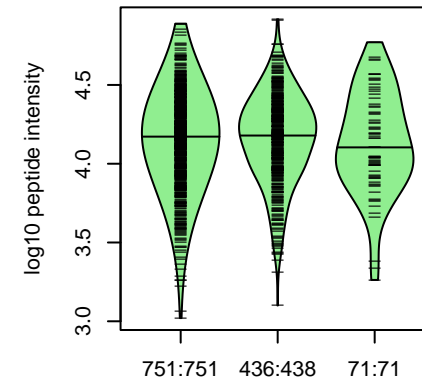

19:859368:G:T\_T  
p = 0.8, beta = -0.0119, N = 1258

**CFD : NP4  
P00746**

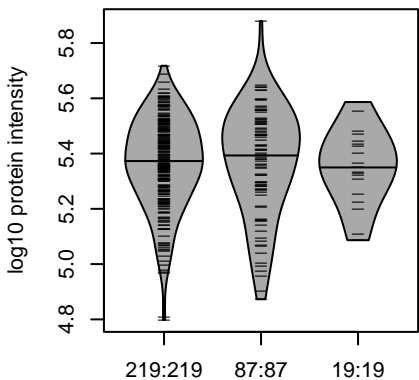

19:859368:G:T\_T  
p = 0.47, beta = -0.0662, N = 325

**AVPHPDSQPDTIDHLLLLQLSEK pc  
K7ERG9;P00746**

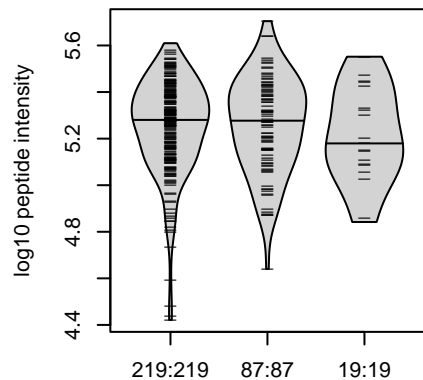

19:859368:G:T\_T  
p = 0.28, beta = -0.0996, N = 325

**DVAPGTLCDVAGWGIVNHAGR pc3  
K7ERG9;P00746**

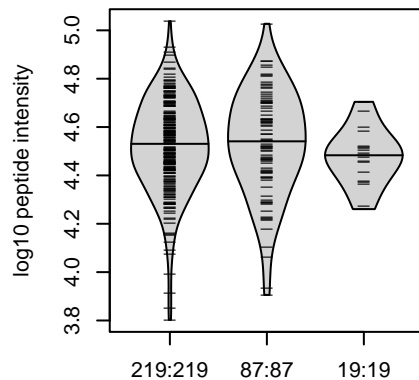

19:859368:G:T\_T  
p = 0.46, beta = -0.0684, N = 325

**GDSGGPLVCGGVLEGVVTSGSR pc  
K7ERG9;P00746**

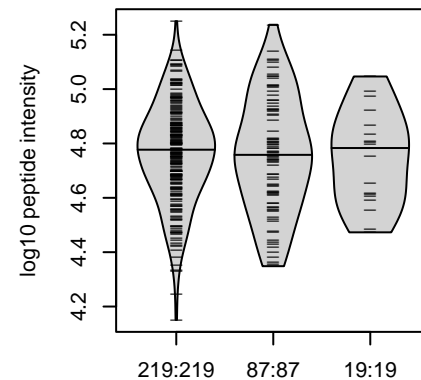

19:859368:G:T\_T  
p = 0.33, beta = -0.0898, N = 325

**LMCAESNR pc2  
K7ERG9;P00746**

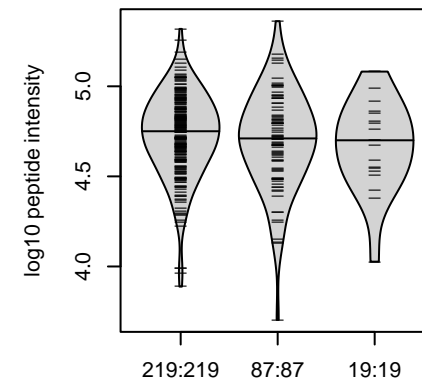

19:859368:G:T\_T  
p = 0.13, beta = -0.14, N = 325

Assay Target: CFD  
Olink UniProt: P00746  
UKB rsID: rs71335276  
Proxy rsID: rs71335276  
UKB SNP: 19:859368:G:T  
Proxy SNP: 19:859368:G:T  
UKB log10(p): 131.4  
UKB BETA: -0.181  
-----  
1259:1259:1258:1258:1258:125

**ITGAM : NP4**  
**P11215;P11215-2**

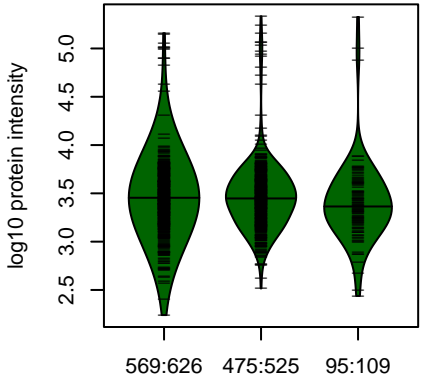

16:31363977:C:T\_C  
p = 0.28, beta = -0.0498, N = 1139

**TEFQLELPVK pc2**  
**P11215;P11215-2**

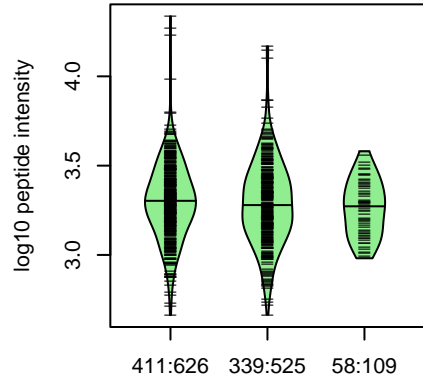

16:31363977:C:T\_C  
p = 0.11, beta = -0.0889, N = 808

**FGAALTVLGDVNGDK pc2**  
**H3BN02;P11215;P11215-2;P2070:**

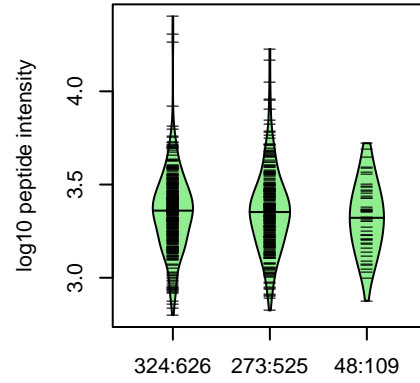

16:31363977:C:T\_C  
p = 0.34, beta = -0.0599, N = 645

**LTDVAIGAPGEEDNR pc2**  
**P11215;P11215-2**

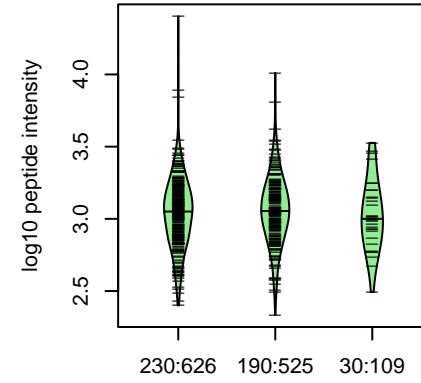

16:31363977:C:T\_C  
p = 0.76, beta = 0.0233, N = 450

**FGDPLGYEDVIPEADREGVIR pc3**  
**P11215;P11215-2**

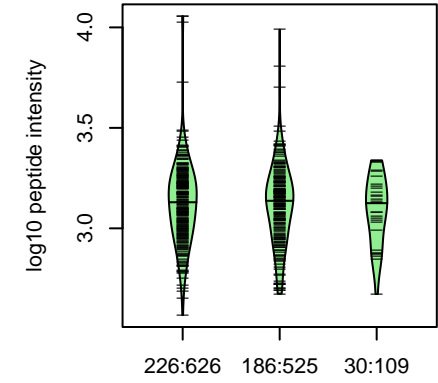

16:31363977:C:T\_C  
p = 0.5, beta = -0.0514, N = 442

**ITGAM : NP4**  
**P11215;P11215-2**

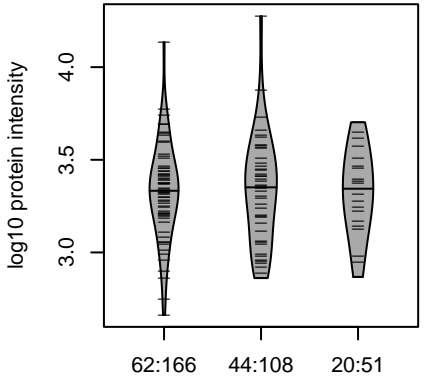

16:31363977:C:T\_C  
p = 0.41, beta = 0.0978, N = 126

**TEFQLELPVK pc2**  
**P11215;P11215-2**

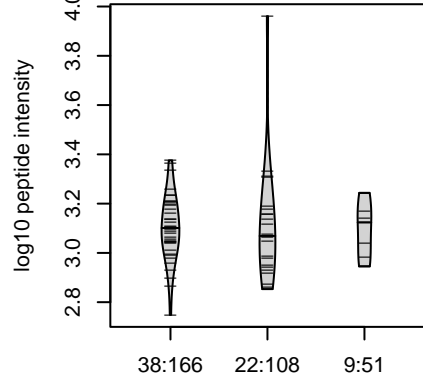

16:31363977:C:T\_C  
p = 0.35, beta = 0.152, N = 69

**VVVGAPQEIVAANQR pc2**  
**P11215;P11215-2**

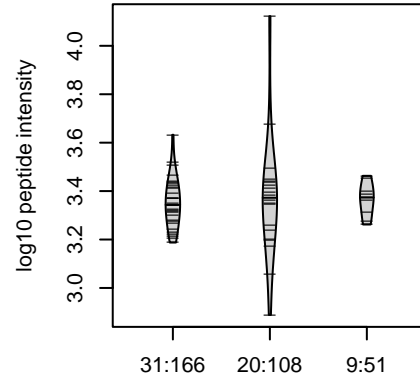

16:31363977:C:T\_C  
p = 0.61, beta = 0.0876, N = 60

**GLCFLFGSNLR pc2**  
**P11215;P11215-2**

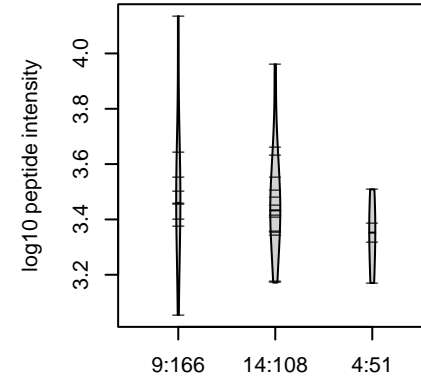

16:31363977:C:T\_C  
p = 0.51, beta = -0.176, N = 27

**NVFECNDQVVK pc2**  
**P11215;P11215-2**

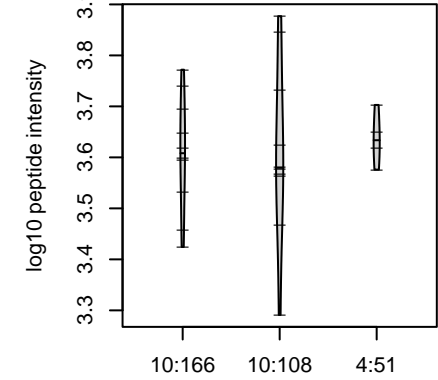

16:31363977:C:T\_C  
p = 0.26, beta = 0.292, N = 24

**LACESASSTEVSALK pc2**  
**rs1143683 REF**

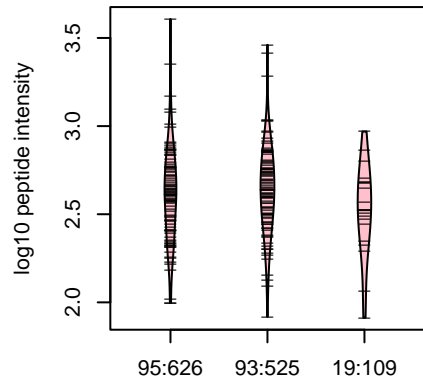

16:31363977:C:T\_C  
p = 0.25, model = REC, N = 207

**LACESASSTEVSGLK pc2**  
**rs1143683 ALT**

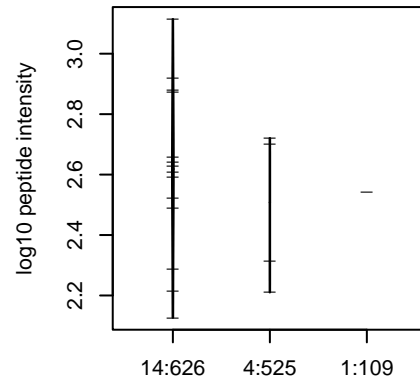

16:31363977:C:T\_C  
p = NA, model = NA, N = 19

Assay Target: ITGAM  
Olink UniProt: P11215  
UKB rsID: rs10665069  
Proxy rsID: rs11574631  
UKB SNP: 16:31362590:T:TAA  
Proxy SNP: 16:31363977:C:T  
UKB log10(p): 131.2  
UKB BETA: 0.159  
-----  
808:645:450:442:427:405:394:3





**EIF2AK2 : NP1  
P19525**

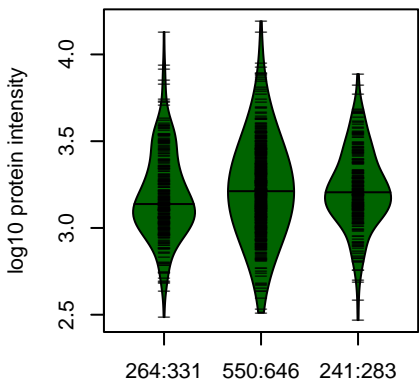

2:37380668:C:T\_T  
p = 0.029, beta = 0.0967, N = 1055

**VLALELFEQITK pc2**

**\*AL9;A0A7P0TBA9;A0A7P0Z4M0;P19A7P0TAL9;A0A7P0TBA9;A0A7P0Z4M0A7P0TAL9;A0A7P0TBA9;P19525;P19A7P0TAL9;A0A7P0TBA9;A0A7P0Z4M0;P19**

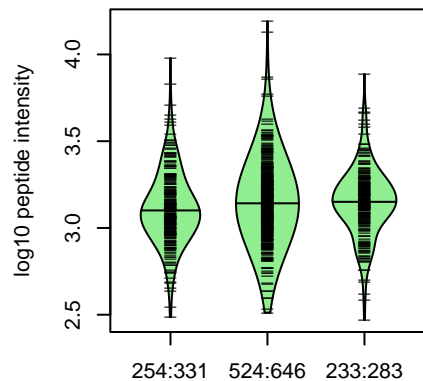

2:37380668:C:T\_T  
p = 0.012, beta = 0.113, N = 1011

**EIELIGSGGFGQVFK pc2**

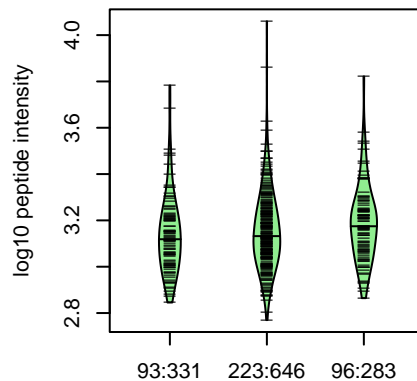

2:37380668:C:T\_T  
p = 0.034, beta = 0.152, N = 412

**IGDFGLVTSLK pc2**

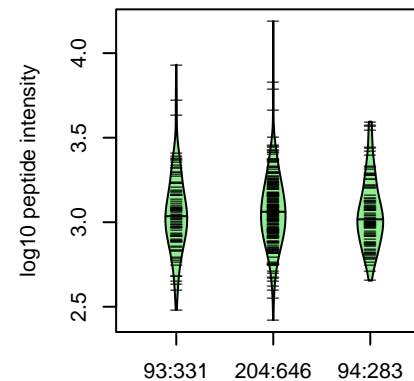

2:37380668:C:T\_T  
p = 0.67, beta = 0.0306, N = 391

**GTLEQWIEK pc2**

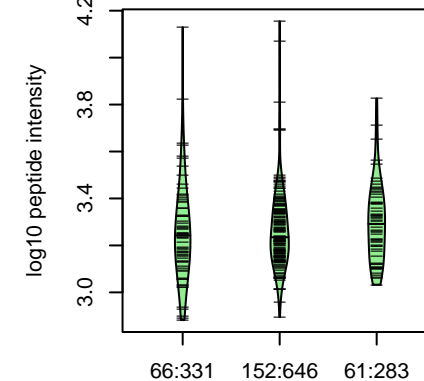

2:37380668:C:T\_T  
p = 0.14, beta = 0.129, N = 279

**EIF2AK2 : NP1  
P19525**

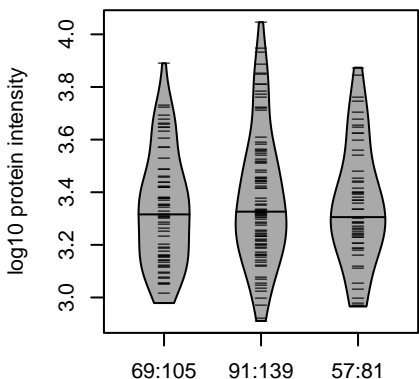

2:37380668:C:T\_T  
p = 0.78, beta = 0.0249, N = 217

**VLALELFEQITK pc2**

**\*AL9;A0A7P0TBA9;A0A7P0Z4M0;P19A7P0TAL9;A0A7P0TBA9;P19525;P19A7P0TAL9;A0A7P0TBA9;A0A7P0Z4M0A7P0TAL9;A0A7P0TBA9;A0A7P0Z4M0;P19**

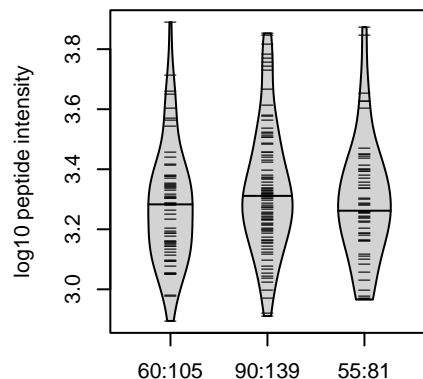

2:37380668:C:T\_T  
p = 0.7, beta = 0.0359, N = 205

**IGDFGLVTSLK pc2**

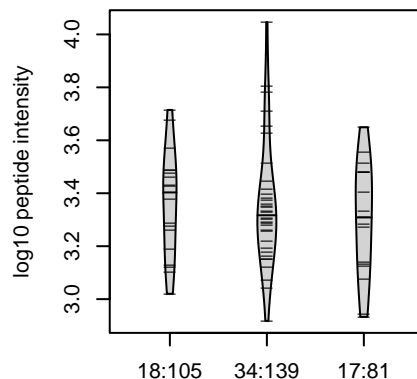

2:37380668:C:T\_T  
p = 0.22, beta = -0.2, N = 69

**EIELIGSGGFGQVFK pc2**

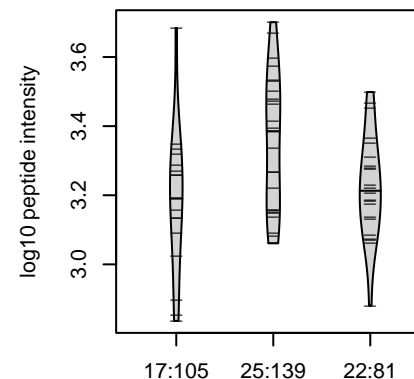

2:37380668:C:T\_T  
p = 0.83, beta = -0.0342, N = 64

**GTLEQWIEK pc2**

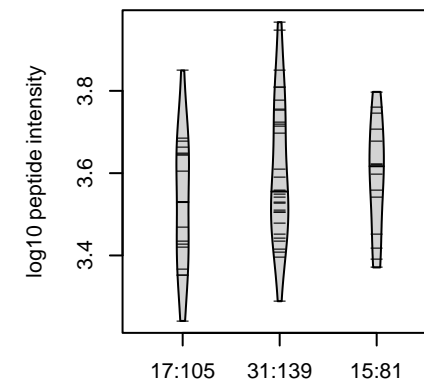

2:37380668:C:T\_T  
p = 0.54, beta = 0.105, N = 63

Assay Target: EIF2AK2  
Olink UniProt: P19525  
UKB rsID: rs11894449  
Proxy rsID: rs11894449  
UKB SNP: 2:37380668:C:T  
Proxy SNP: 2:37380668:C:T  
UKB log10(p): 130.4  
UKB BETA: 0.148  
-----  
1011:412:391:279:260:250:204:

**SOD2 : NP4  
P04179**

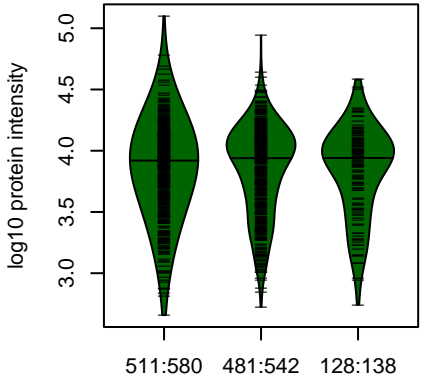

6:160071652:T:G\_G  
p = 0.57, beta = -0.0248, N = 1120

**HHAAYVNNLVTEEK pc3  
9;G5E9P6;P04179-2;P04179-3;P0417**

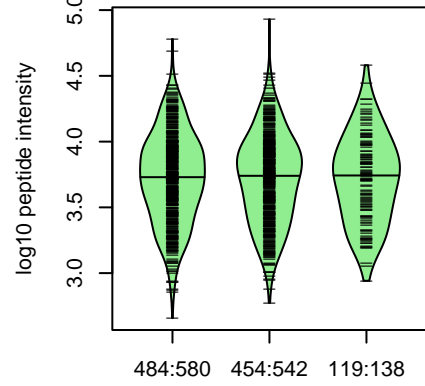

6:160071652:T:G\_G  
p = 0.87, beta = -0.00741, N = 1057

**GDVTAQIALQPALK pc2  
P04179-3;P04179-4;P04179**

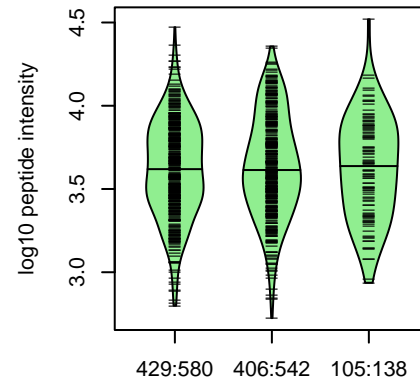

6:160071652:T:G\_G  
p = 0.72, beta = 0.0173, N = 940

**AIWNVINWENVTER pc2  
P04179-2;P04179-3;P04179-4;P0419;G5E9P6;P04179-2;P04179-3;P0417**

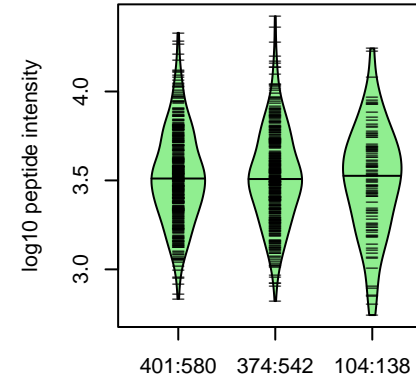

6:160071652:T:G\_G  
p = 0.4, beta = -0.0419, N = 879

**YQEALAK pc2**

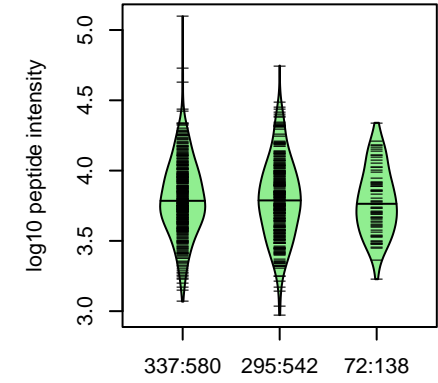

6:160071652:T:G\_G  
p = 0.55, beta = -0.0335, N = 704

**SOD2 : NP4  
P04179**

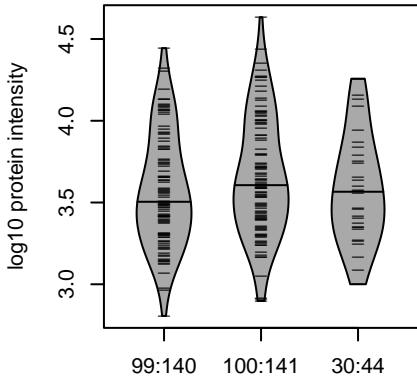

6:160071652:T:G\_G  
p = 0.29, beta = 0.1, N = 229

**GDVTAQIALQPALK pc2  
P04179-3;P04179-4;P04179**

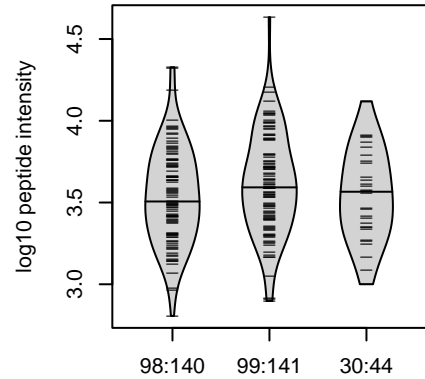

6:160071652:T:G\_G  
p = 0.34, beta = 0.0904, N = 227

**HHAAYVNNLVTEEK pc3  
9;G5E9P6;P04179-2;P04179-3;P0417**

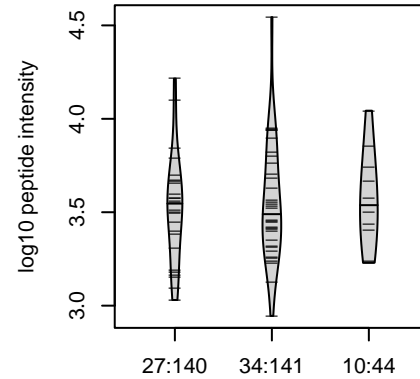

6:160071652:T:G\_G  
p = 0.62, beta = 0.0832, N = 71

**AIWNVINWENVTER pc2  
P04179-2;P04179-3;P04179-4;P0419;G5E9P6;P04179-2;P04179-3;P0417**

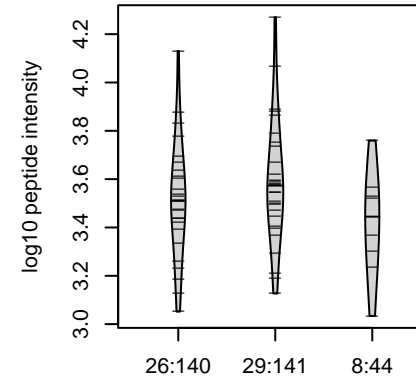

6:160071652:T:G\_G  
p = 1, beta = -0.000864, N = 63

**NVRPDYLK pc2  
P04179-2;P04179-3;P04179-4;P0419;G5E9P6;P04179-2;P04179-3;P0417**

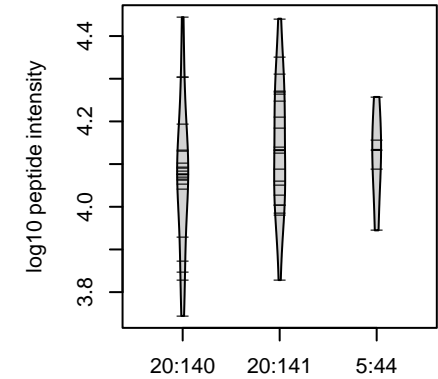

6:160071652:T:G\_G  
p = 0.37, beta = 0.19, N = 45

Assay Target: SOD2  
Olink UniProt: P04179  
UKB rsID: rs9457699  
Proxy rsID: rs9457699  
UKB SNP: 6:160071652:T:G  
Proxy SNP: 6:160071652:T:G  
UKB log10(p): 130.2  
UKB BETA: 0.157  
-----  
1057:940:879:704:669:475:439:

**PSTPIP2 : NP1**  
**Q9H939**

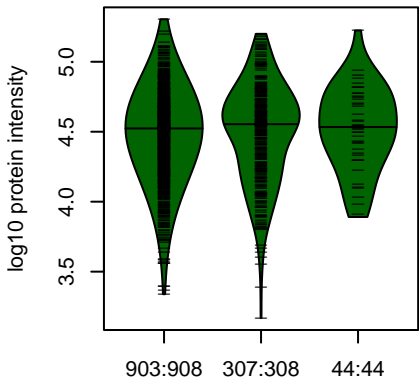

18:43572677:T:A\_A  
p = 0.37, beta = 0.0473, N = 1254

**KTELMDAIHK pc3**  
**Q9H939;Q9H939-2**

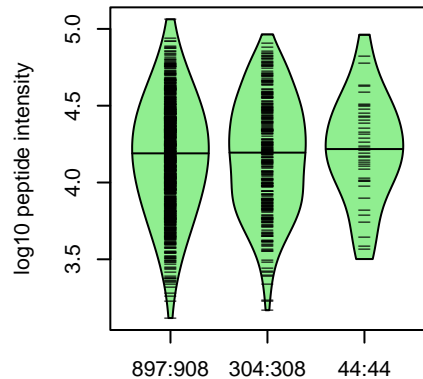

18:43572677:T:A\_A  
p = 0.47, beta = 0.0378, N = 1245

**VREEWQSEHIK pc3**  
**Q9H939;Q9H939-2**

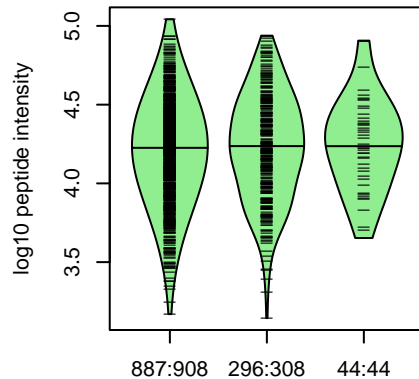

18:43572677:T:A\_A  
p = 0.11, beta = 0.0852, N = 1227

**EFEDFLK pc2**  
**Q9H939;Q9H939-2**

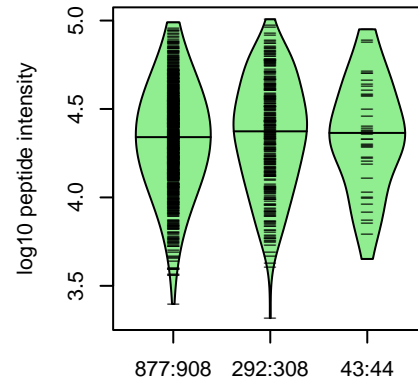

18:43572677:T:A\_A  
p = 0.28, beta = 0.0578, N = 1212

**SANLVNPK pc2**  
**Q9H939;Q9H939-2**

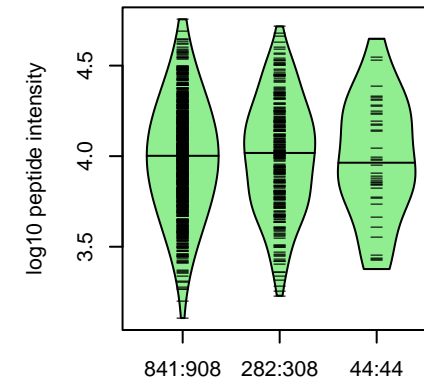

18:43572677:T:A\_A  
p = 0.68, beta = 0.0223, N = 1167

**PSTPIP2 : NP1**  
**Q9H939**

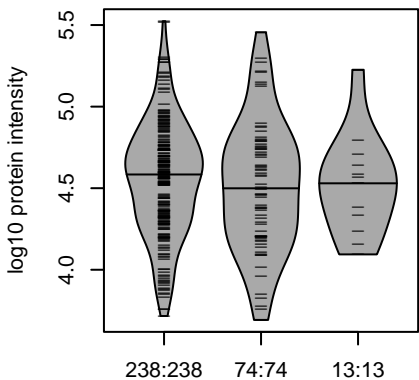

18:43572677:T:A\_A  
p = 0.74, beta = -0.0341, N = 325

**KTELMDAIHK pc3**  
**Q9H939;Q9H939-2**

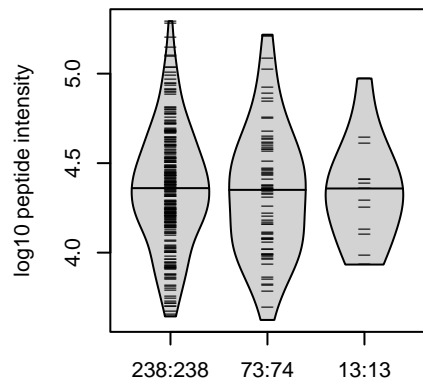

18:43572677:T:A\_A  
p = 0.77, beta = 0.0294, N = 324

**VREEWQSEHIK pc3**  
**Q9H939;Q9H939-2**

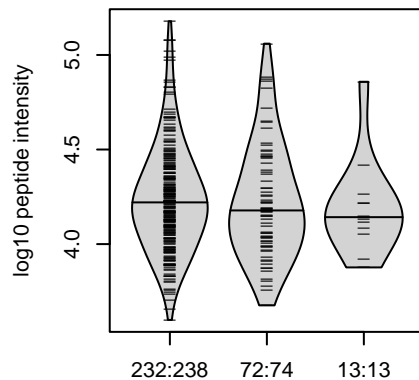

18:43572677:T:A\_A  
p = 0.99, beta = 0.00168, N = 317

**EFEDFLK pc2**  
**Q9H939;Q9H939-2**

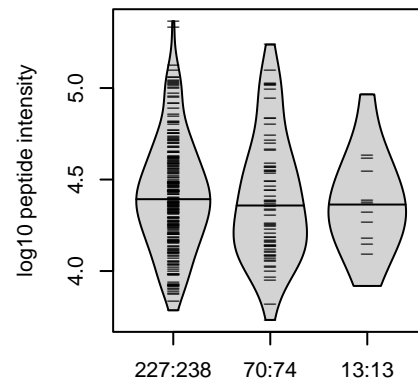

18:43572677:T:A\_A  
p = 0.83, beta = 0.0215, N = 310

**DLLNLSR pc2**  
**Q9H939;Q9H939-2**

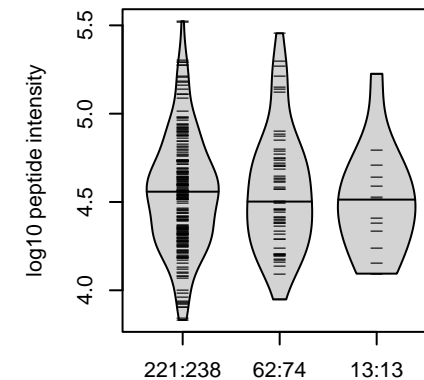

18:43572677:T:A\_A  
p = 0.7, beta = 0.04, N = 296

Assay Target: PSTPIP2  
Olink UniProt: Q9H939  
UKB rsID: rs72642434  
Proxy rsID: rs72642434  
UKB SNP: 18:43572677:T:A  
Proxy SNP: 18:43572677:T:A  
UKB log10(p): 130.1  
UKB BETA: -0.222  
-----  
1245:1227:1212:1167:1128:104

**ITGAV : NP2**  
**P06756;P06756-2;P06756-3**

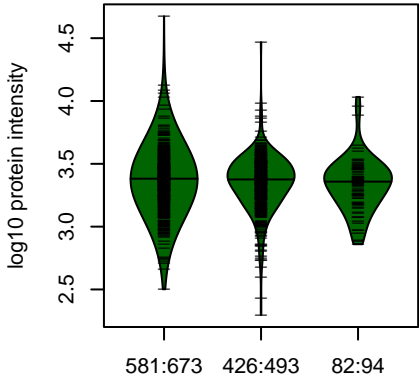

2:187522750:G:T\_T  
 p = 0.017, beta = -0.113, N = 1089

**MFLLVGAPK pc2**  
**P06756-2;P06756-3;P06756**

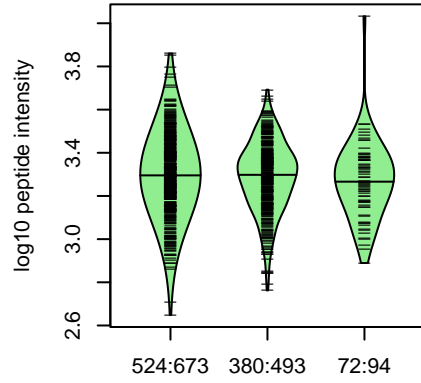

2:187522750:G:T\_T  
 p = 0.09, beta = -0.0857, N = 976

**LQEVGQVSVSLQR pc2**  
**P06756-2;P06756-3;P06756**

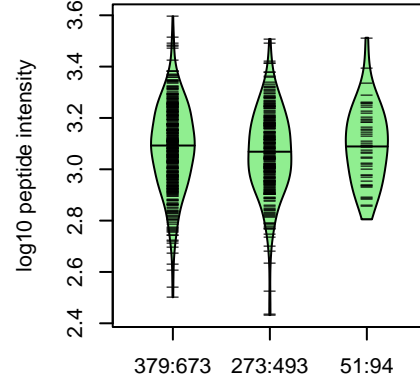

2:187522750:G:T\_T  
 p = 0.47, beta = -0.043, N = 703

**TLGMVYIDGK pc2**  
**P06756-2;P06756-3;P06756**

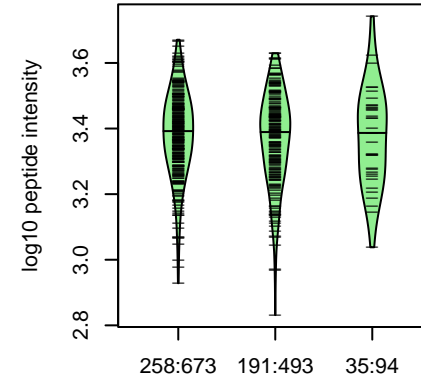

2:187522750:G:T\_T  
 p = 0.17, beta = -0.098, N = 484

**ILACAPLYHWR pc3**  
**P06756-2;P06756-3;P06756**

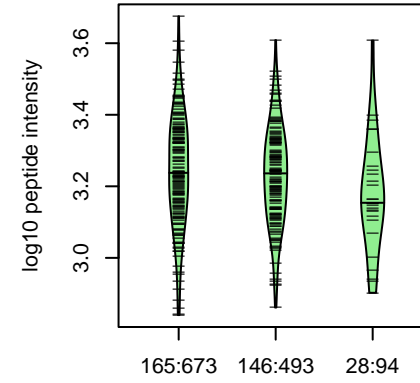

2:187522750:G:T\_T  
 p = 0.08, beta = -0.147, N = 339

**ITGAV : NP2**  
**P06756;P06756-2;P06756-3**

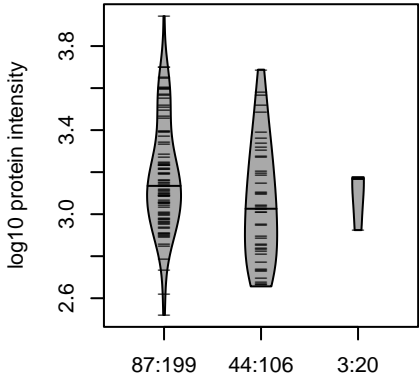

2:187522750:G:T\_T  
 p = 0.024, beta = -0.357, N = 134

**LQEVGQVSVSLQR pc2**  
**P06756-2;P06756-3;P06756**

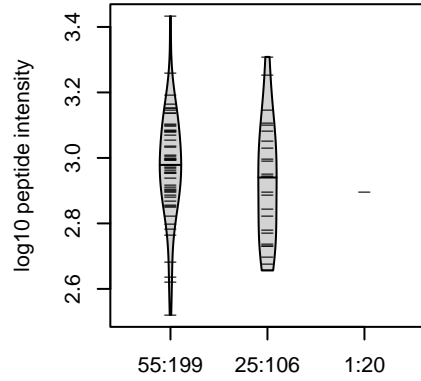

2:187522750:G:T\_T  
 p = 0.36, beta = -0.2, N = 81

**VDLAVLAAVEIR pc2**  
**P06756-2;P06756-3;P06756**

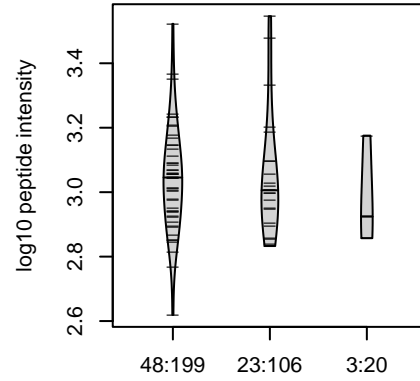

2:187522750:G:T\_T  
 p = 0.84, beta = 0.0406, N = 74

**SLLWTETFMNK pc2**  
**P06756-2;P06756-3;P06756**

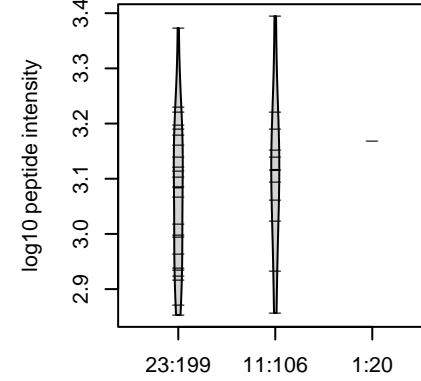

2:187522750:G:T\_T  
 p = 0.064, beta = 0.536, N = 35

**IYIGDDNPLTLIVK pc2**  
**P06756-2;P06756-3;P06756**

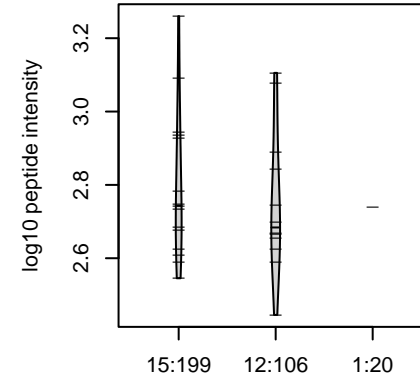

2:187522750:G:T\_T  
 p = 0.75, beta = -0.0992, N = 28

Assay Target: ITGAV  
 Olink UniProt: P06756  
 UKB rsID: rs13006483  
 Proxy rsID: rs13006483  
 UKB SNP: 2:187522750:G:T  
 Proxy SNP: 2:187522750:G:T  
 UKB log10(p): 124.5  
 UKB BETA: -0.156  
 -----NA  
 976:703:484:339:267:256:139:9



**ITGAL : NP1  
P20701**

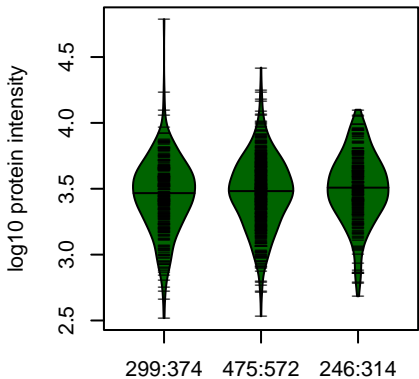

16:30485393:G:C\_G  
p = 0.08, beta = 0.0747, N = 1020

**DWAGGFLDLK pc2  
P20701;P20701-3**

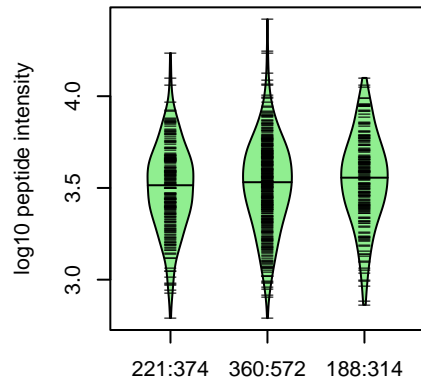

16:30485393:G:C\_G  
p = 0.19, beta = 0.0639, N = 769

**AGYLG YTVT WLPSR pc2  
P20701;P20701-3**

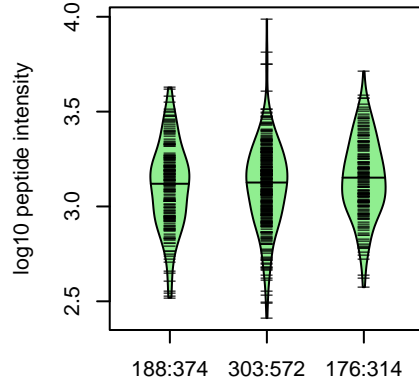

16:30485393:G:C\_G  
p = 0.23, beta = 0.0619, N = 667

**VDV VYEK pc2  
B4E021;P20701;P20701-3**

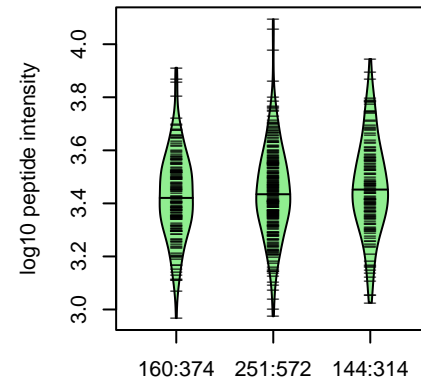

16:30485393:G:C\_G  
p = 0.2, beta = 0.0736, N = 555

**GHAVVGAVGAK pc2  
P20701;P20701-3**

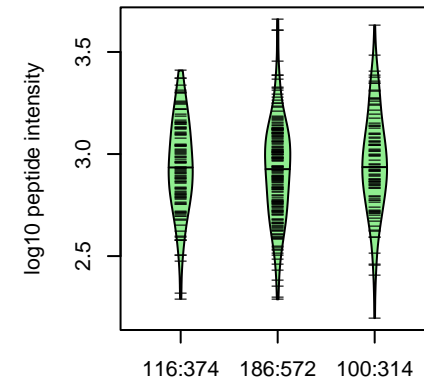

16:30485393:G:C\_G  
p = 0.83, beta = -0.0145, N = 402

**ITGAL : NP1  
P20701;P20701-3**

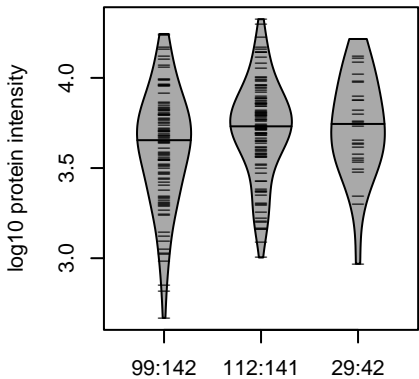

16:30485393:G:C\_G  
p = 0.019, beta = 0.221, N = 240

**DWAGGFLDLK pc2  
P20701;P20701-3**

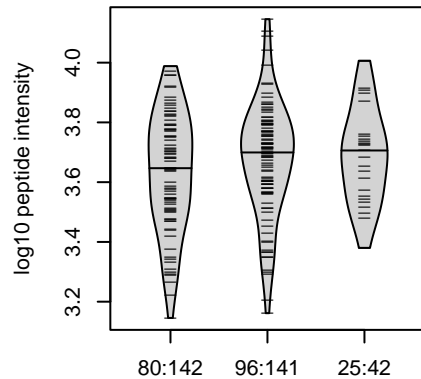

16:30485393:G:C\_G  
p = 0.24, beta = 0.121, N = 201

**AGYLG YTVT WLPSR pc2  
P20701;P20701-3**

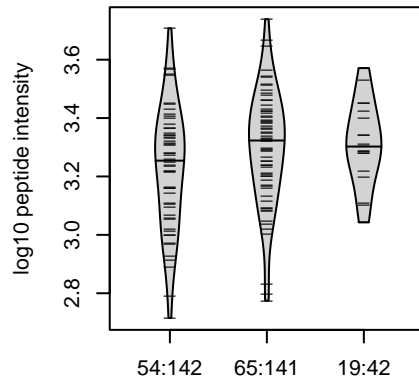

16:30485393:G:C\_G  
p = 0.019, beta = 0.284, N = 138

**GHAVVGAVGAK pc2  
P20701;P20701-3**

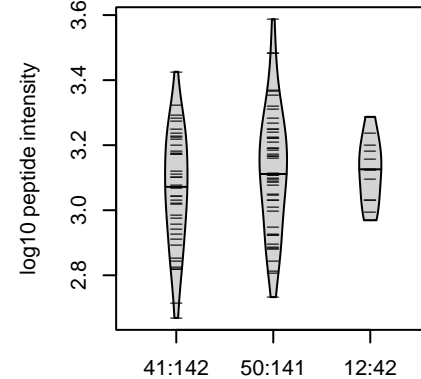

16:30485393:G:C\_G  
p = 0.36, beta = 0.133, N = 103

**IEGTQVLSGIQWFR pc2  
P20701;P20701-3**

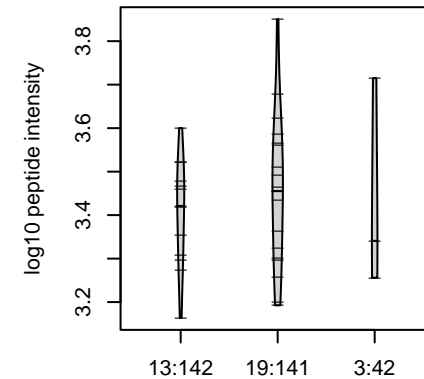

16:30485393:G:C\_G  
p = 0.82, beta = -0.0589, N = 35

Assay Target: ITGAL  
Olink UniProt: P20701  
UKB rsID: rs11574938  
Proxy rsID: rs11574938  
UKB SNP: 16:30485393:G:C  
Proxy SNP: 16:30485393:G:C  
UKB log10(p): 123.7  
UKB BETA: -0.149  
- - - - -NA  
769:667:555:402:337:264:123:9





**MMP9 : NP5  
P14780**

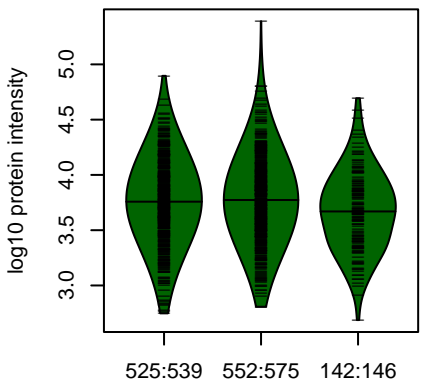

20:44640225:A:G\_G  
p = 0.15, beta = -0.0607, N = 1219

**SLGPALLLQK pc2  
P14780**

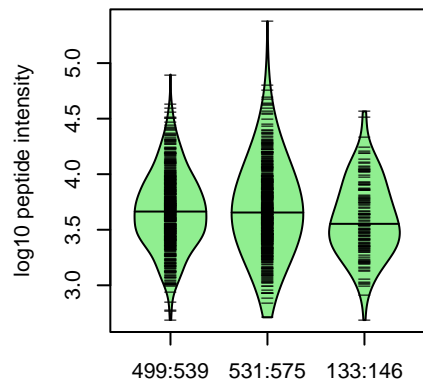

20:44640225:A:G\_G  
p = 0.15, beta = -0.0624, N = 1163

**LGLGADVAQVTGALR pc2  
P14780**

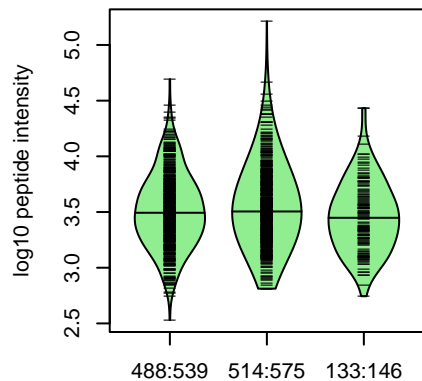

20:44640225:A:G\_G  
p = 0.89, beta = -0.00637, N = 1135

**QVWVYTGASVLGPR pc2  
P14780**

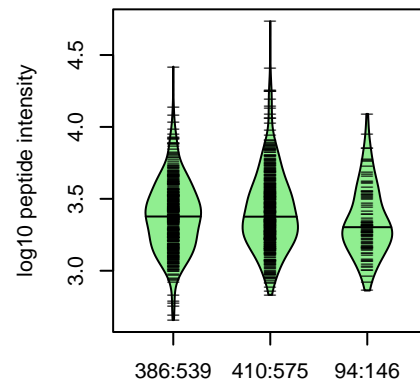

20:44640225:A:G\_G  
p = 0.65, beta = -0.0233, N = 890

**LFGFCPTR pc2  
P14780**

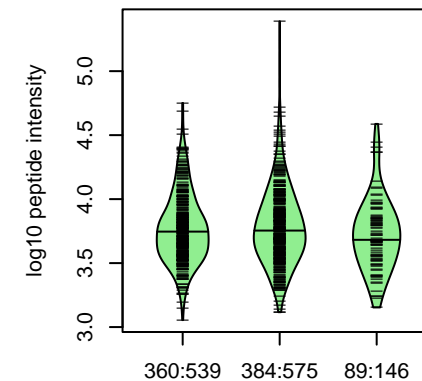

20:44640225:A:G\_G  
p = 0.33, beta = -0.0512, N = 833

**MMP9 : NP5  
P14780**

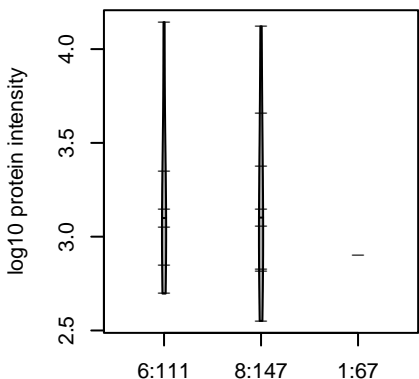

20:44640225:A:G\_G  
p = 0.69, beta = -0.156, N = 15

**LYTQDGNADGK pc2  
rs17576 REF**

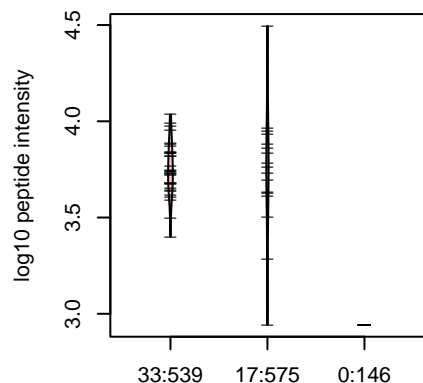

20:44640225:A:G\_G  
p = 0.0011, model = REC, N = 50

**KLDSVFEER pc2  
rs2250889 REF**

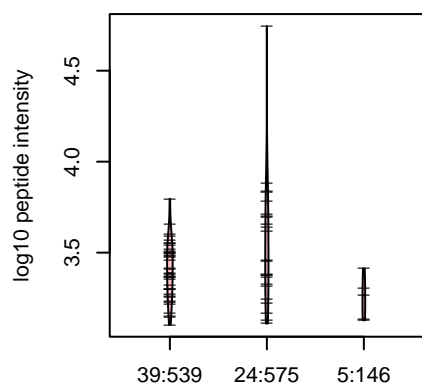

20:44640225:A:G\_G  
p = 0.016, model = REC, N = 68

**KLDSVFEELSK pc2  
rs2250889 ALT**

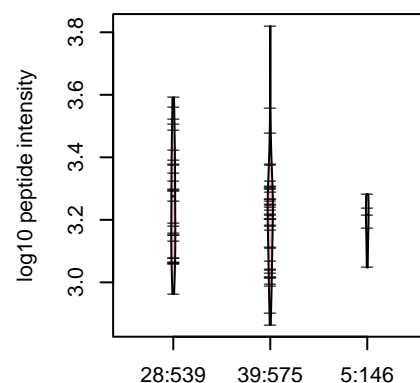

20:44640225:A:G\_G  
p = 0.26, model = DOM, N = 72

**KLDSVFEELSK pc3  
rs2250889 ALT**

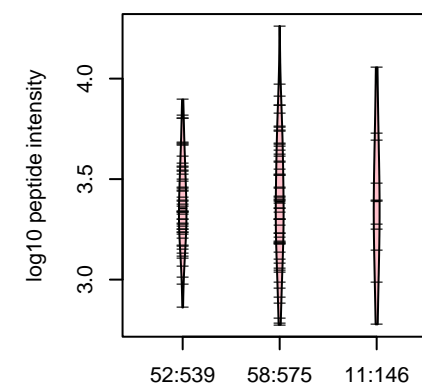

20:44640225:A:G\_G  
p = 0.46, model = DOM, N = 121

Assay Target: MMP9  
Olink UniProt: P14780  
UKB rsID: rs17576  
Proxy rsID: rs17576  
UKB SNP: 20:44640225:A:G  
Proxy SNP: 20:44640225:A:G  
UKB log10(p): 116.2  
UKB BETA: 0.144  
-----  
1163:1135:890:833:704:679:657







**CRIP2 : NP1  
P52943**

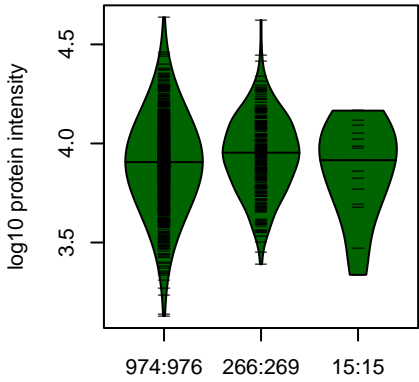

14:105917816:G:C\_C  
p = 0.029, beta = 0.135, N = 1255

**GVNIGGAGSYIYEK pc2  
P52943;P52943-2**

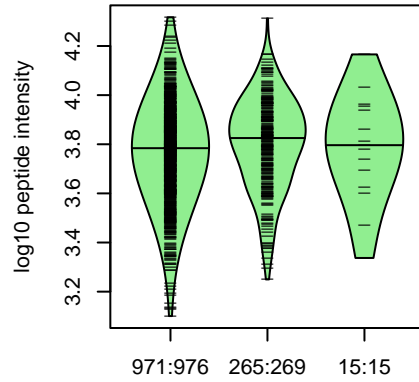

14:105917816:G:C\_C  
p = 0.019, beta = 0.145, N = 1251

**PCYGILFGPK pc2  
P52943;P52943-2**

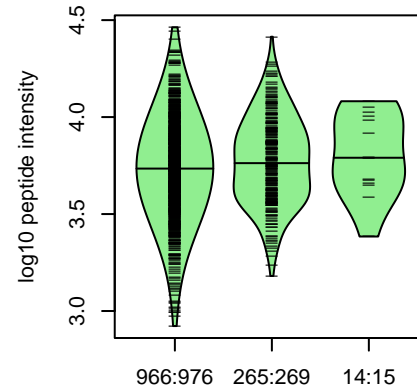

14:105917816:G:C\_C  
p = 0.027, beta = 0.138, N = 1245

**PCYATLFGPK pc2  
P52943;P52943-2**

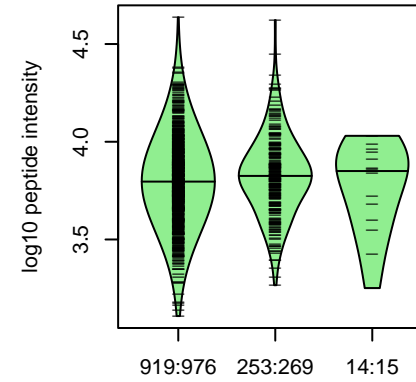

14:105917816:G:C\_C  
p = 0.36, beta = 0.0583, N = 1186

**TLTPGGHAEHDGQPYCHK pc3  
P52943;P52943-2**

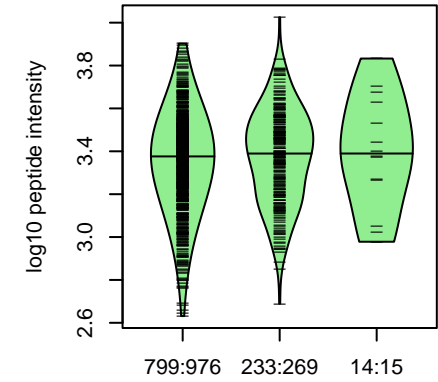

14:105917816:G:C\_C  
p = 0.075, beta = 0.118, N = 1046

**CRIP2 : NP1  
P52943-2**

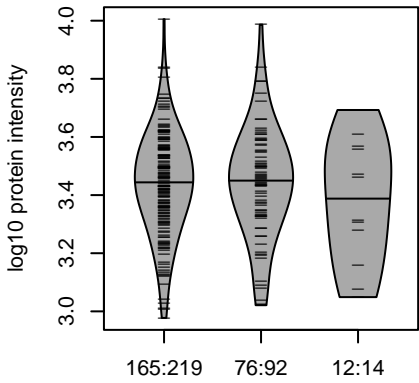

14:105917816:G:C\_C  
p = 0.97, beta = 0.00464, N = 253

**GVNIGGAGSYIYEK pc2  
P52943;P52943-2**

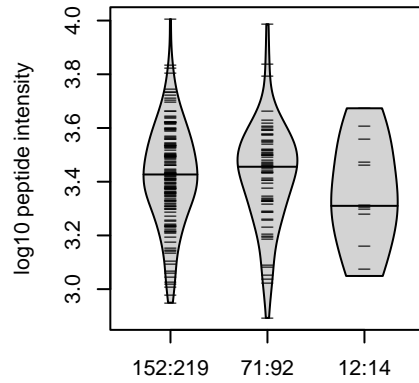

14:105917816:G:C\_C  
p = 0.7, beta = -0.0429, N = 235

**PCYGILFGPK pc2  
P52943;P52943-2**

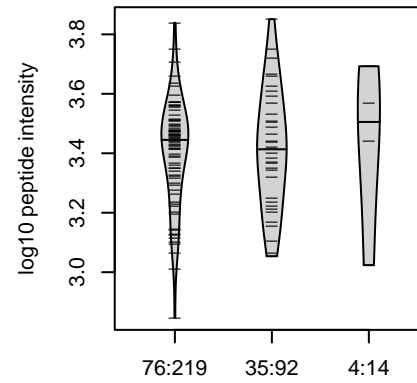

14:105917816:G:C\_C  
p = 0.47, beta = 0.119, N = 115

**ASSVTFTGEPNT CPR pc2  
P52943;P52943-2**

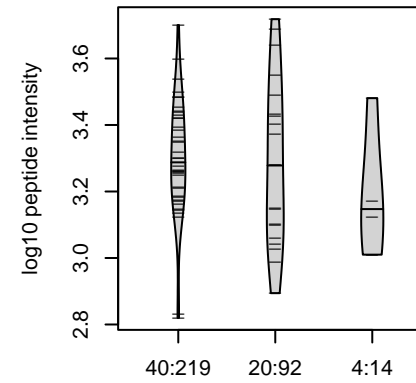

14:105917816:G:C\_C  
p = 0.43, beta = -0.154, N = 64

Assay Target: CRIP2  
Olink UniProt: P52943  
UKB rsID: rs80324969  
Proxy rsID: rs80324969  
UKB SNP: 14:105917816:G:C  
Proxy SNP: 14:105917816:G:C  
UKB log10(p): 112.5  
UKB BETA: 0.185  
-----  
1251:1245:1186:1046:1013:674

**PRSS2 : NP2**  
A0A0J9YYC8;A6XMV9;P07478

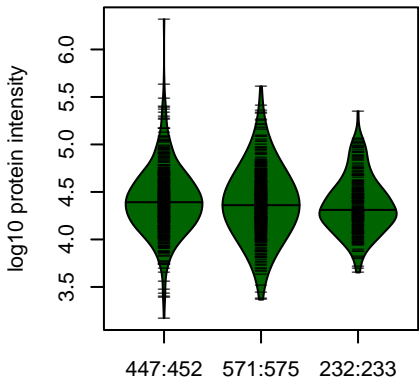

7:142470574:A:G\_G  
p = 0.14, beta = -0.0579, N = 1250

**LSSPAVINSR pc2**  
A0A0J9YYC8;A6XMV9;P07478

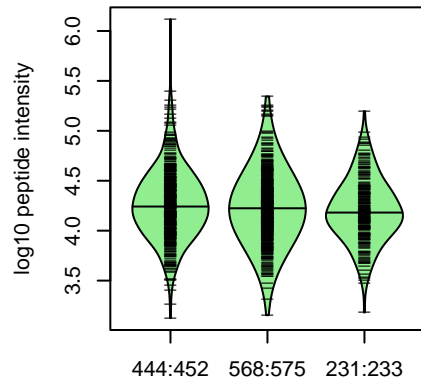

7:142470574:A:G\_G  
p = 0.03, beta = -0.0856, N = 1243

**TLDNDILLIK pc2**  
A0A0J9YYC8;A6XMV9;P07478

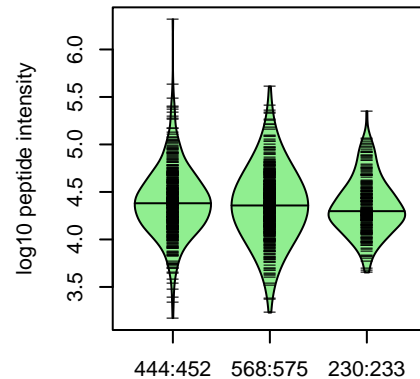

7:142470574:A:G\_G  
p = 0.12, beta = -0.0611, N = 1242

**VYNYVDWIK pc2**  
'P0MNE9;A0A7P0MP65;A6XMV9;P35CYC8;A6XMV9;E7EQ64;P07477;P07478

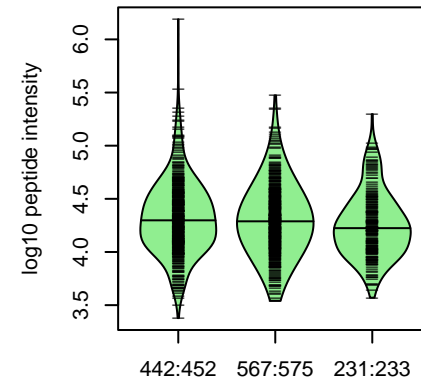

7:142470574:A:G\_G  
p = 0.037, beta = -0.0821, N = 1240

**LGEHNIEVLEGNEQFINAAK pc3**  
'P0MNE9;A0A7P0MP65;A6XMV9;P35CYC8;A6XMV9;E7EQ64;P07477;P07478

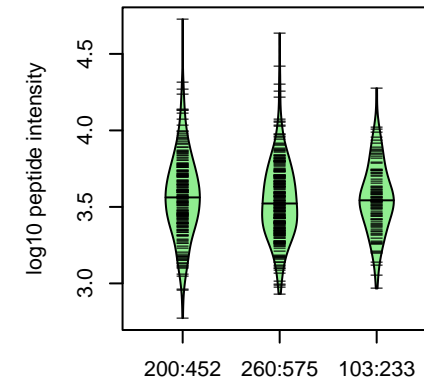

7:142470574:A:G\_G  
p = 0.9, beta = -0.00765, N = 563

**PRSS2 : NP2**  
A0A0J9YYC8;A6XMV9;P07478

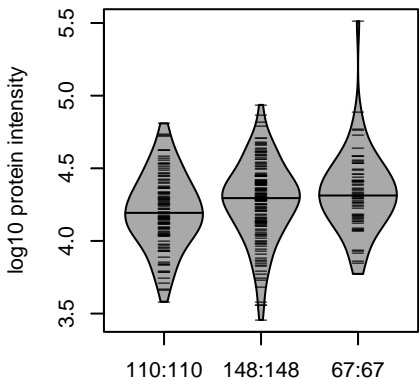

7:142470574:A:G\_A  
p = 0.0029, beta = 0.224, N = 325

**LSSPAVINSR pc2**  
A0A0J9YYC8;A6XMV9;P07478

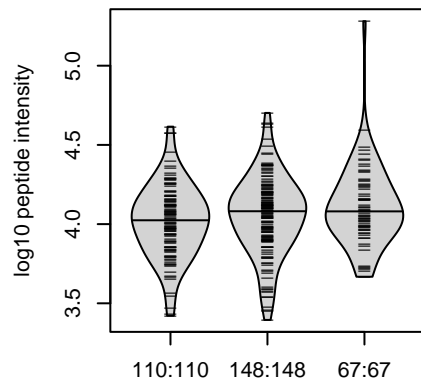

7:142470574:A:G\_A  
p = 0.0053, beta = 0.209, N = 325

**TLDNDILLIK pc2**  
A0A0J9YYC8;A6XMV9;P07478

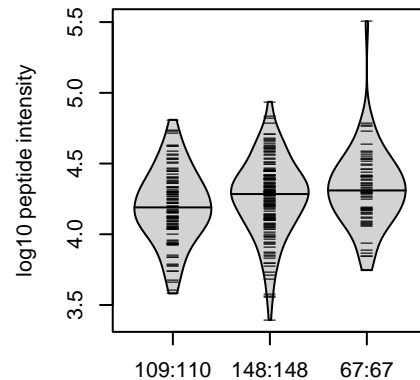

7:142470574:A:G\_A  
p = 0.0041, beta = 0.216, N = 324

**VYNYVDWIK pc2**  
'P0MNE9;A0A7P0MP65;A6XMV9;P35CYC8;A6XMV9;E7EQ64;P07477;P07478

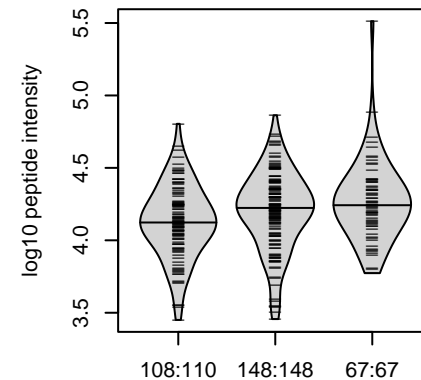

7:142470574:A:G\_A  
p = 0.0015, beta = 0.239, N = 323

**LGEHNIEVLEGNEQFINAAK pc3**  
'P0MNE9;A0A7P0MP65;A6XMV9;P35CYC8;A6XMV9;E7EQ64;P07477;P07478

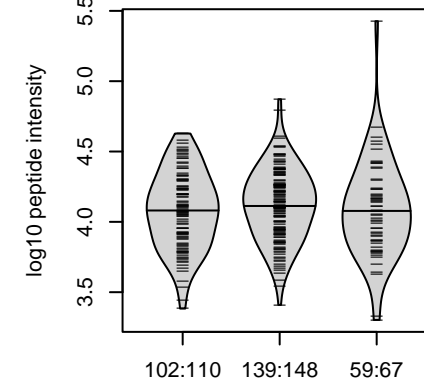

7:142470574:A:G\_A  
p = 0.58, beta = 0.0443, N = 300

Assay Target: PRSS2  
Olink UniProt: P07478  
UKB rsID: rs3752404  
Proxy rsID: rs3752404  
UKB SNP: 7:142470574:A:G  
Proxy SNP: 7:142470574:A:G  
UKB log10(p): 110  
UKB BETA: -0.137  
- - - - -  
1243:1242:1240:563:425

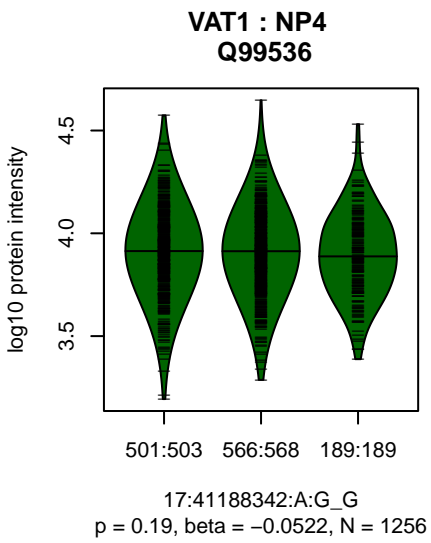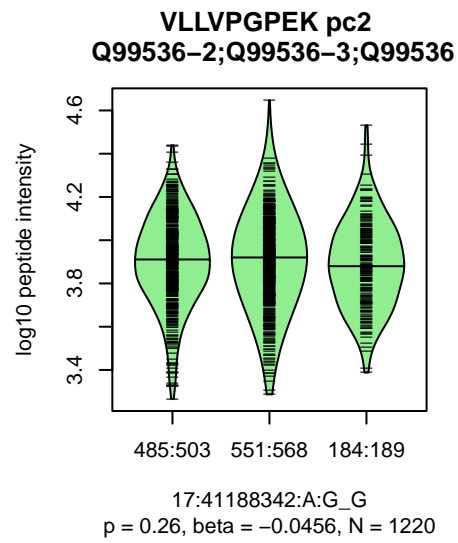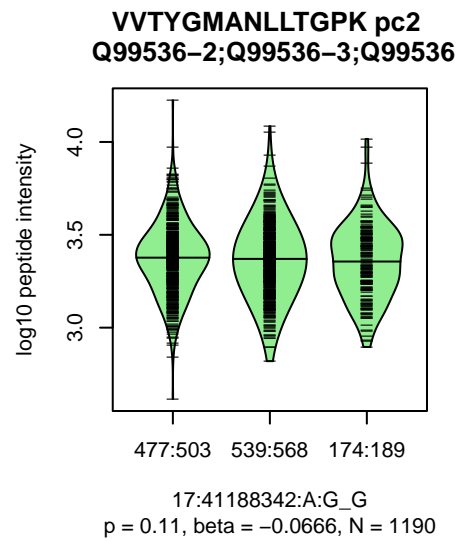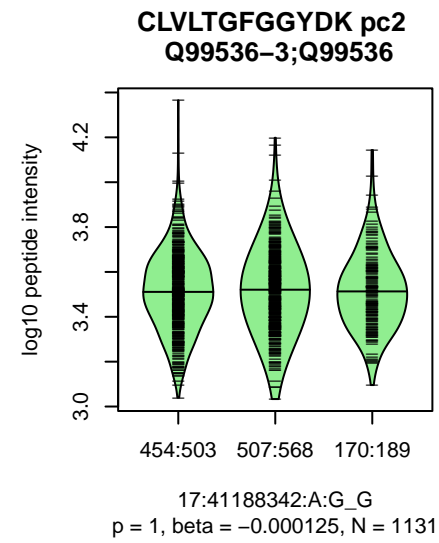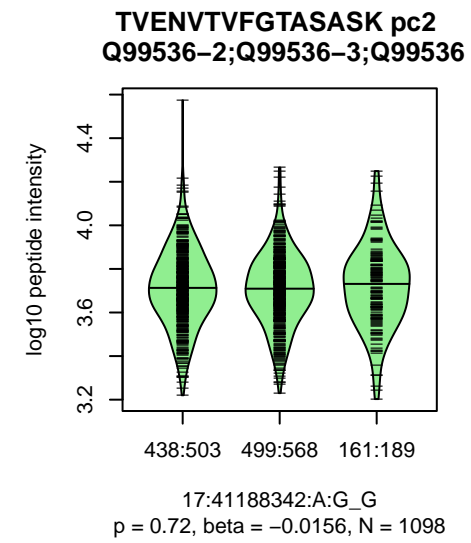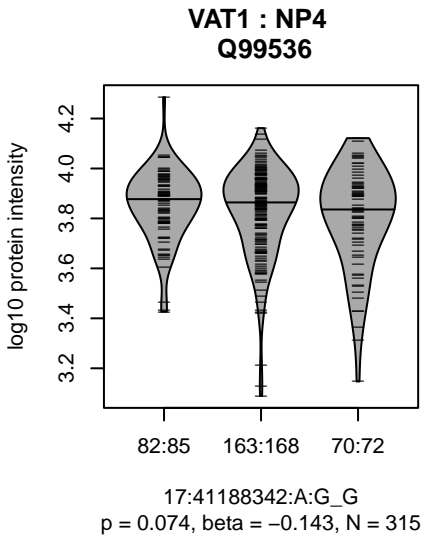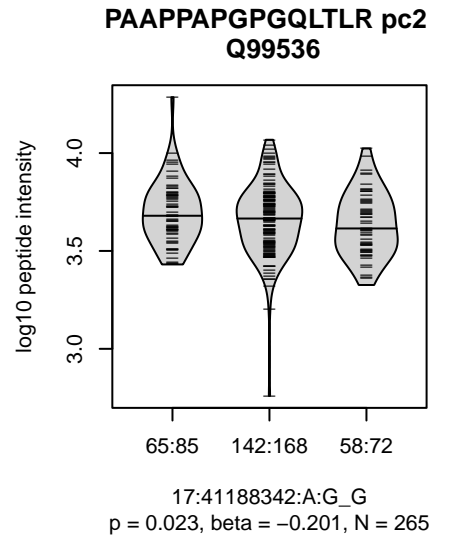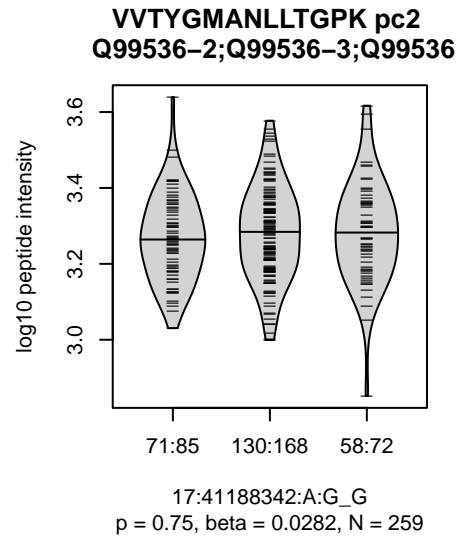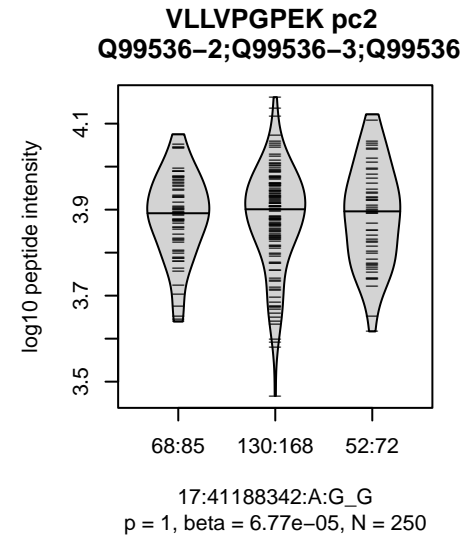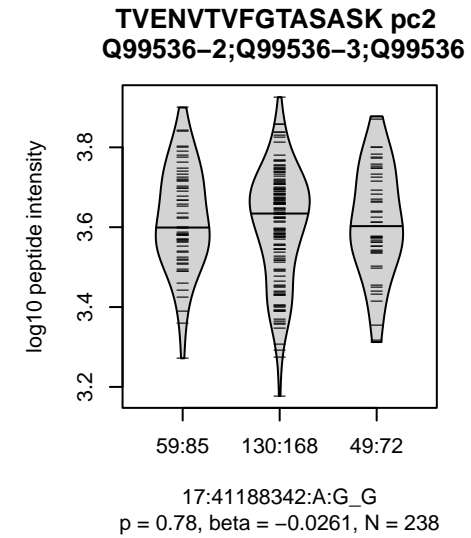

Assay Target: VAT1  
 Olink UniProt: Q99536  
 UKB rsID: rs9911630  
 Proxy rsID: rs9911630  
 UKB SNP: 17:41188342:A:G  
 Proxy SNP: 17:41188342:A:G  
 UKB log10(p): 109.3  
 UKB BETA: -0.145  
 -----  
 1220:1190:1131:1098:1028:973

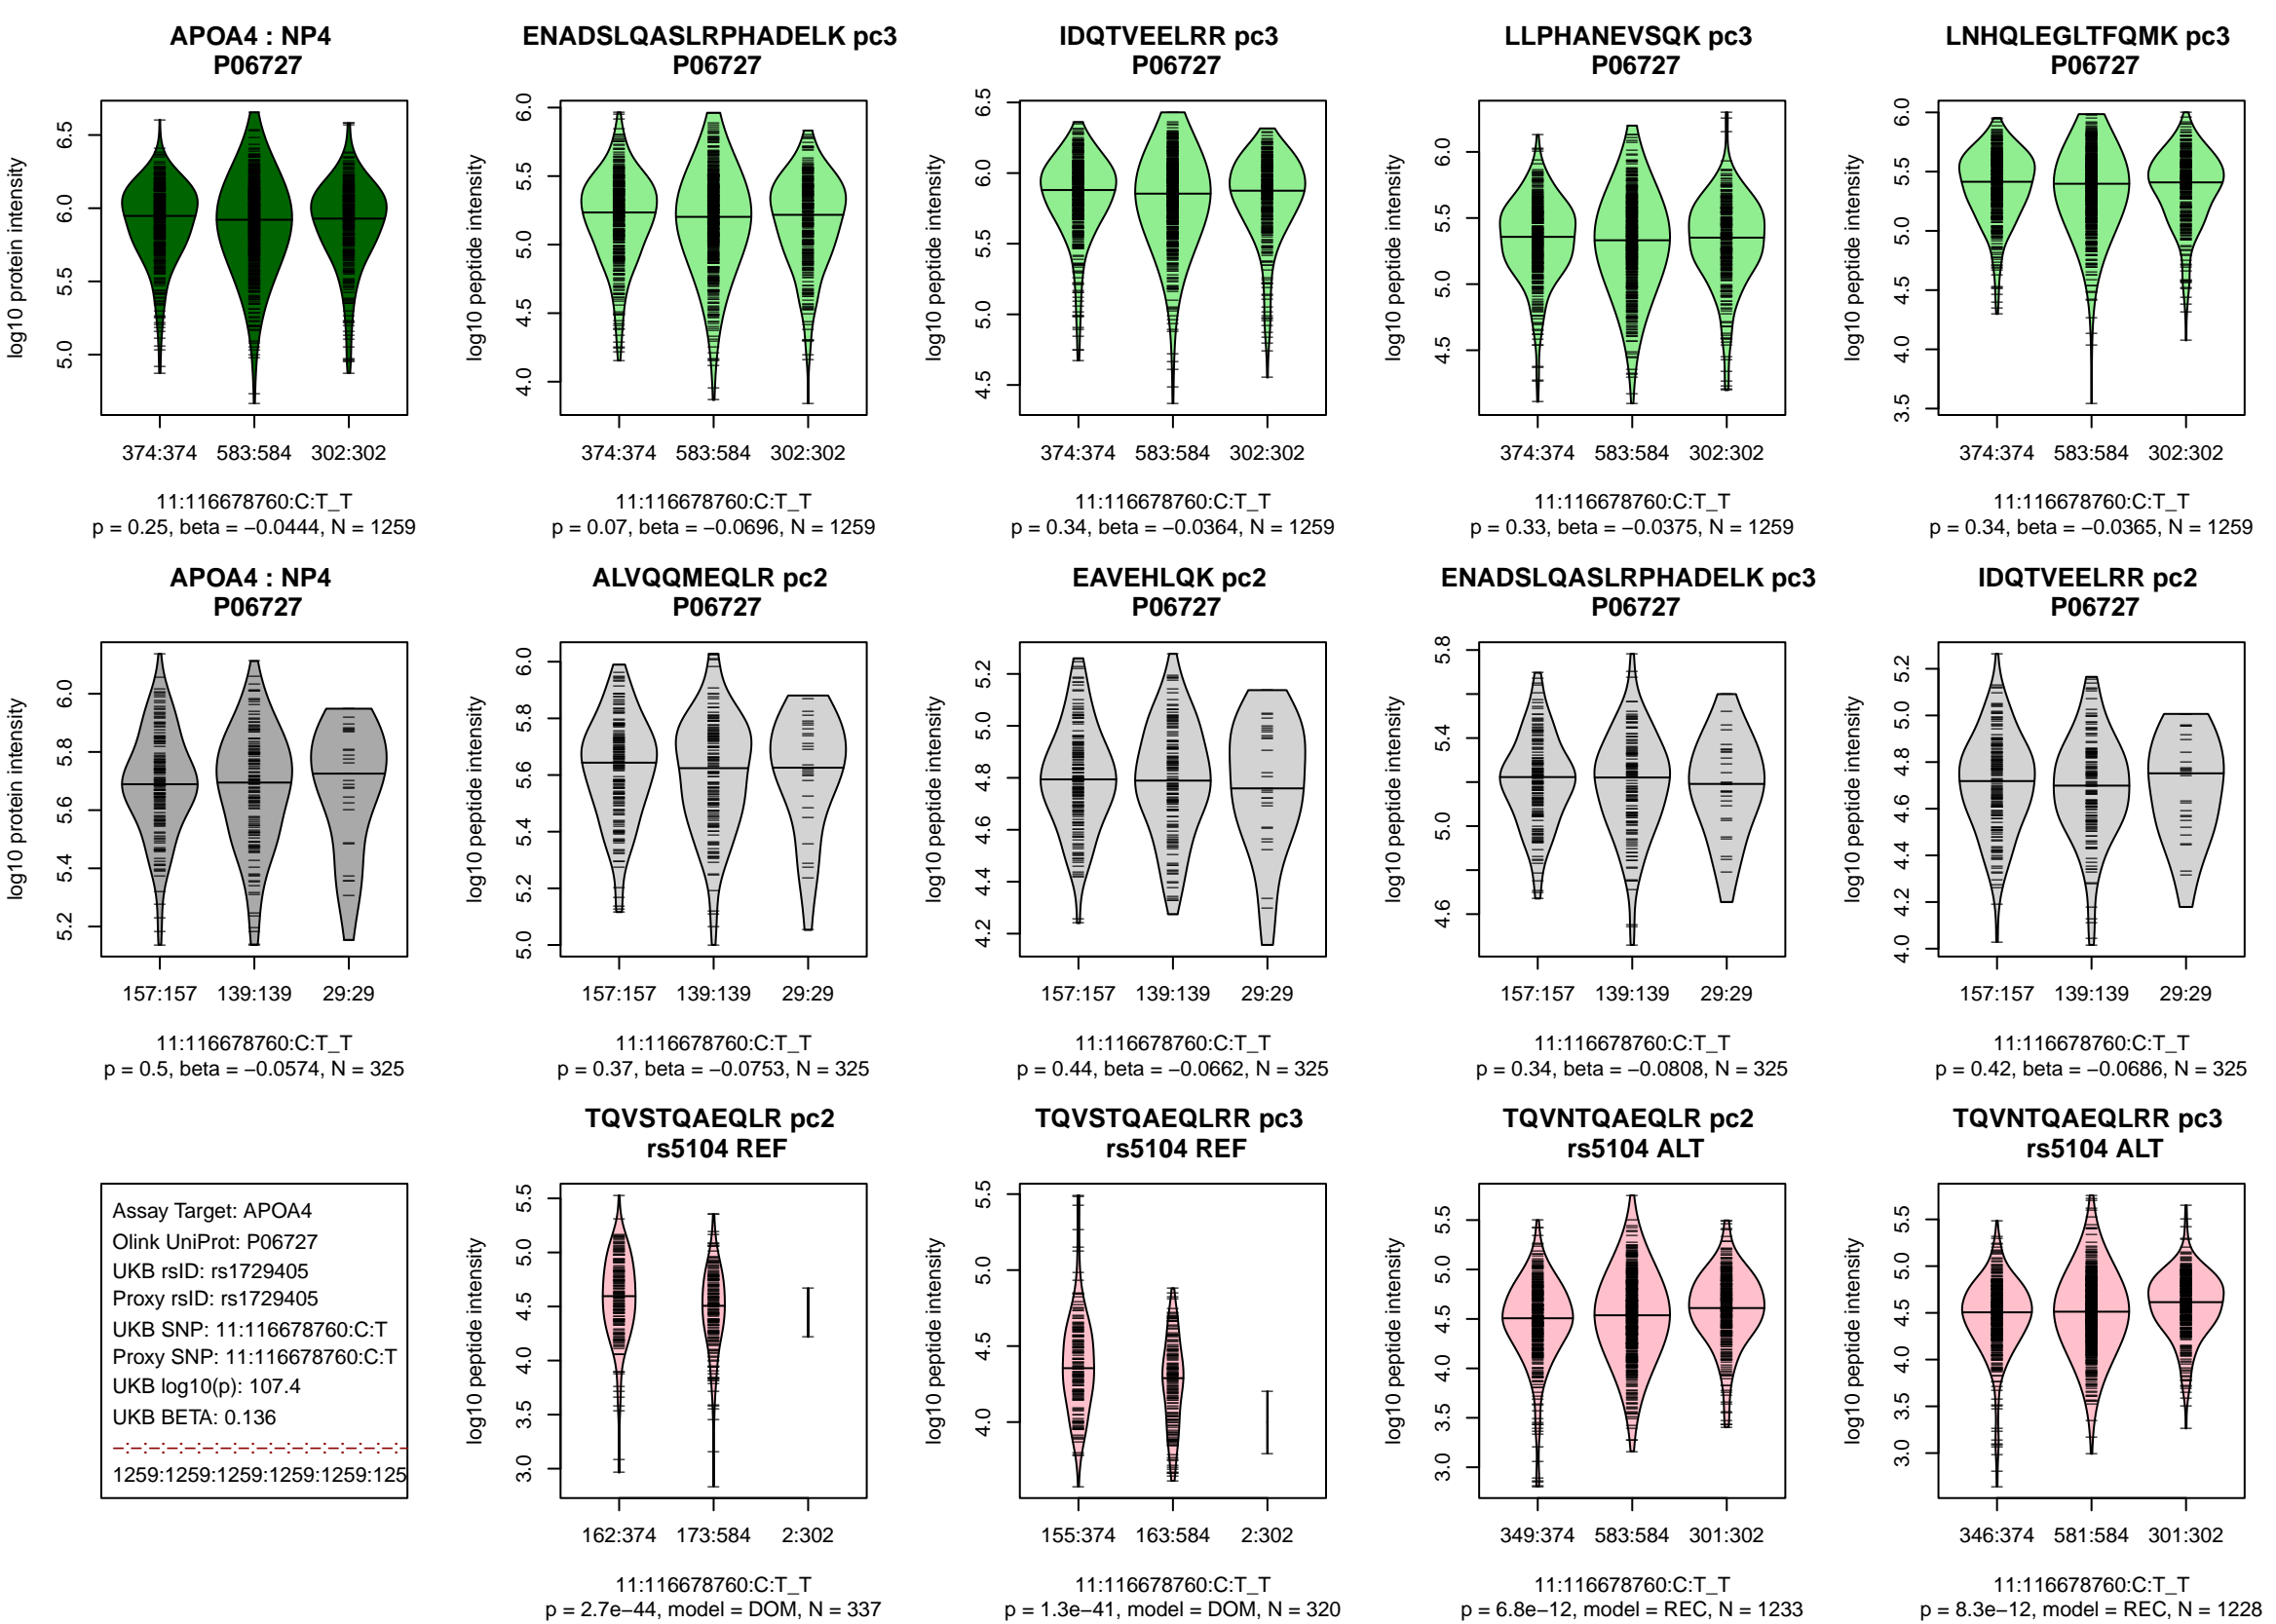



**S100A11 : NP2**  
**P31949**

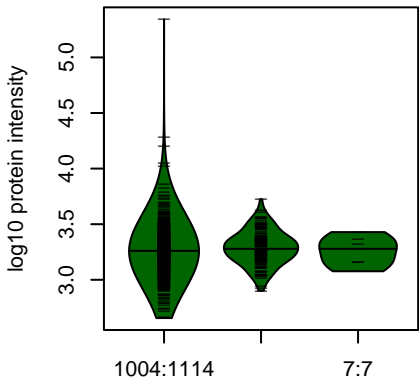

1:152012517:G:C\_C  
 $p = 0.46$ ,  $\beta = 0.0613$ ,  $N = 1144$

**CIESLIAVFQK pc2**  
**P31949**

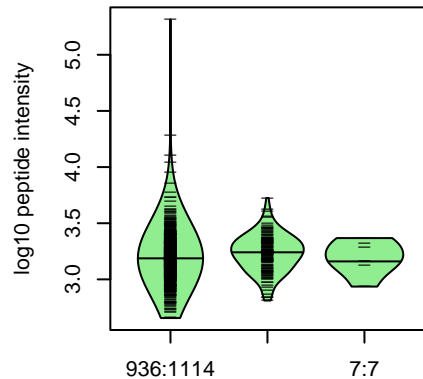

1:152012517:G:C\_C  
 $p = 0.077$ ,  $\beta = 0.149$ ,  $N = 1073$

**TEFLSFMNTELAFTK pc2**  
**P31949**

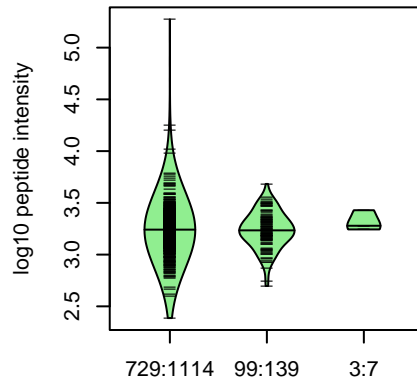

1:152012517:G:C\_C  
 $p = 0.44$ ,  $\beta = -0.0775$ ,  $N = 831$

**ISSPTETER pc2**  
**P31949**

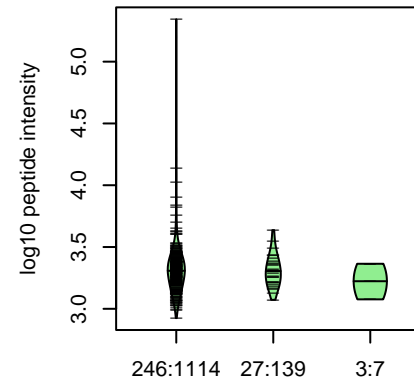

1:152012517:G:C\_C  
 $p = 0.53$ ,  $\beta = -0.106$ ,  $N = 276$

**DGYNYTLSK pc2**  
**P31949**

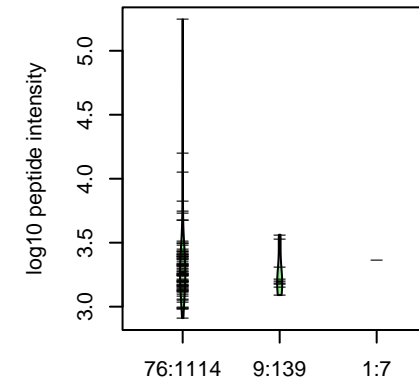

1:152012517:G:C\_C  
 $p = 0.57$ ,  $\beta = -0.162$ ,  $N = 86$

**S100A11 : NP2**  
**P31949**

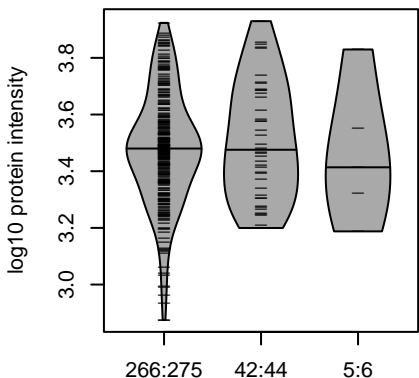

1:152012517:G:C\_C  
 $p = 0.51$ ,  $\beta = 0.0896$ ,  $N = 313$

**CIESLIAVFQK pc2**  
**P31949**

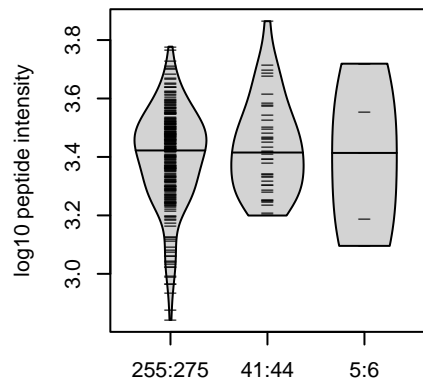

1:152012517:G:C\_C  
 $p = 0.28$ ,  $\beta = 0.147$ ,  $N = 301$

**TEFLSFMNTELAFTK pc2**  
**P31949**

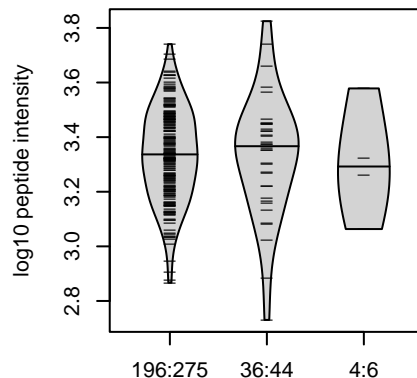

1:152012517:G:C\_C  
 $p = 0.74$ ,  $\beta = 0.0492$ ,  $N = 236$

**DGYNYTLSK pc2**  
**P31949**

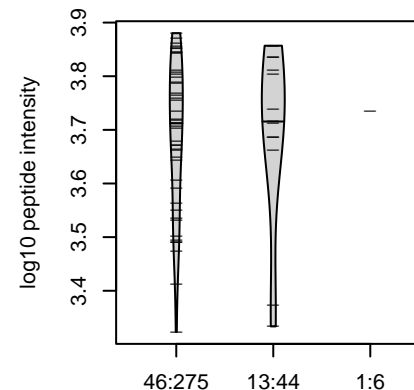

1:152012517:G:C\_C  
 $p = 0.95$ ,  $\beta = 0.0168$ ,  $N = 60$

**ISSPTETER pc2**  
**P31949**

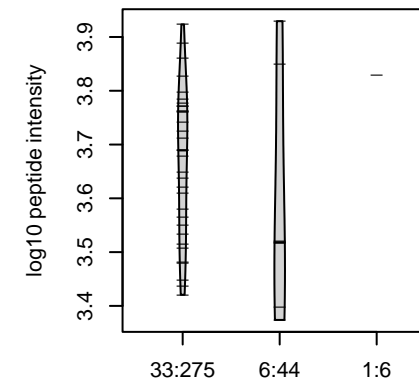

1:152012517:G:C\_C  
 $p = 0.78$ ,  $\beta = 0.0901$ ,  $N = 40$

Assay Target: S100A11  
Olink UniProt: P31949  
UKB rsID: rs3007678  
Proxy rsID: rs3007678  
UKB SNP: 1:152012517:G:C  
Proxy SNP: 1:152012517:G:C  
UKB log10(p): 106.8  
UKB BETA: 0.31  
-:-:-:-  
1073:831:276:86

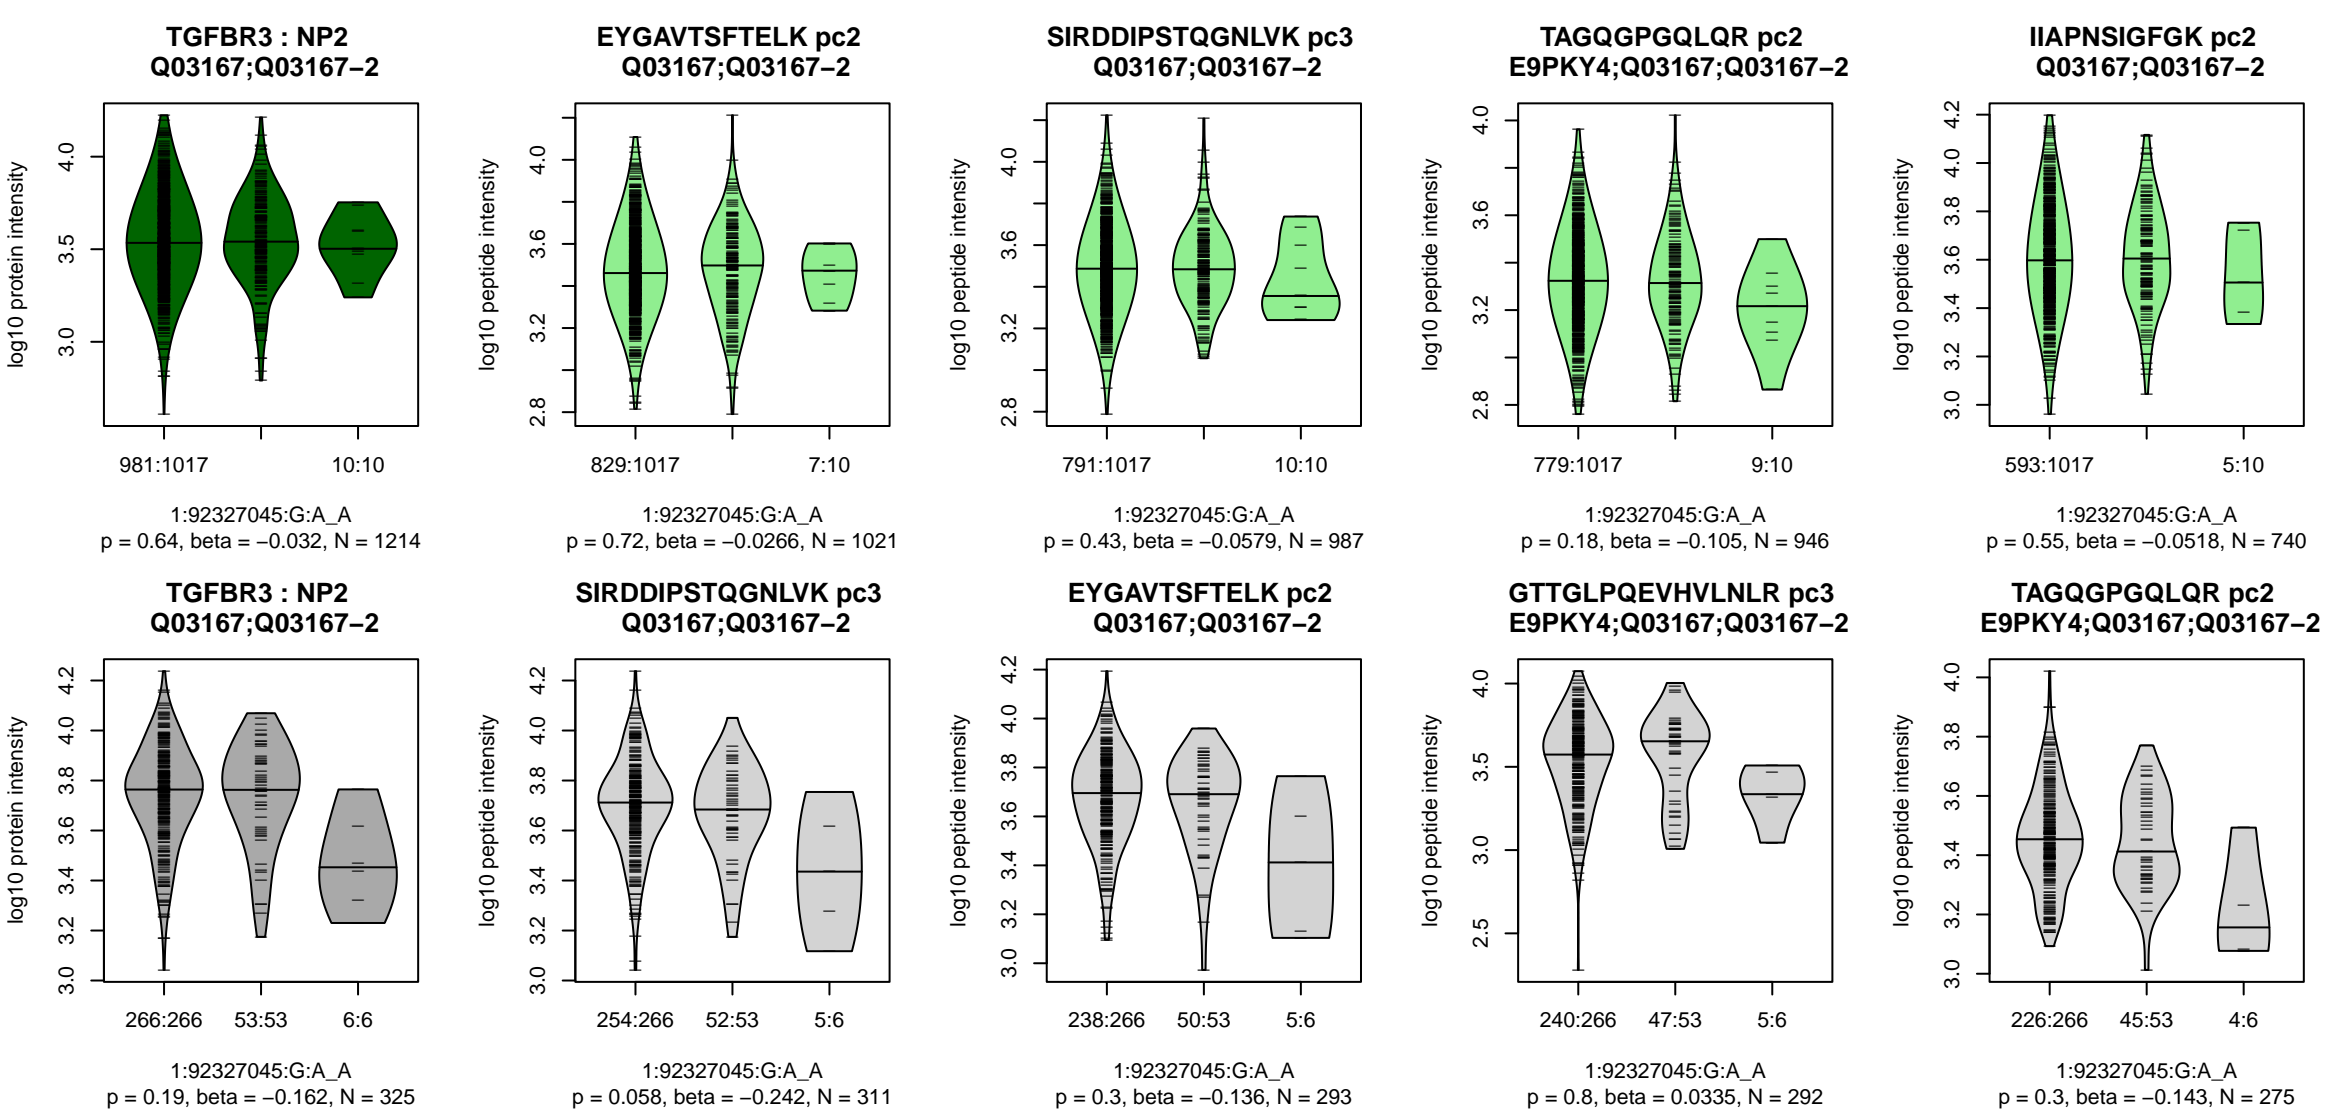

Assay Target: TGFBR3  
 Olink UniProt: Q03167  
 UKB rsID: rs1805110  
 Proxy rsID: rs1805110  
 UKB SNP: 1:92327045:G:A  
 Proxy SNP: 1:92327045:G:A  
 UKB log10(p): 106.6  
 UKB BETA: -0.234  
 - - - - -  
 1021:987:946:740:437:392:251

**SDC1 : NP2  
P18827**

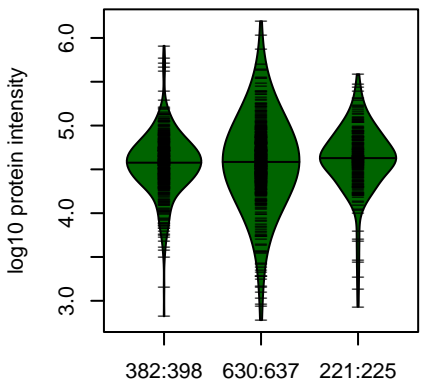

2:20371380:G:A\_A  
 $p = 0.037$ ,  $\beta = 0.0859$ ,  $N = 1233$

**EGEAVVLPEVEPGLTAR pc2  
E9PHH3;P18827**

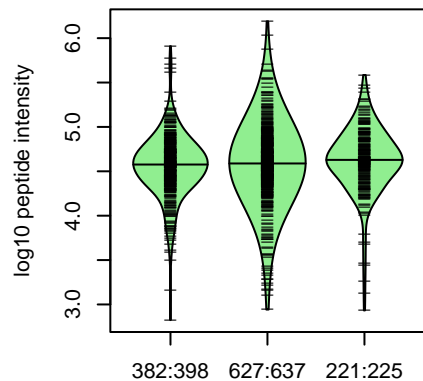

2:20371380:G:A\_A  
 $p = 0.032$ ,  $\beta = 0.0882$ ,  $N = 1230$

**NQSPVDQGATGASQGLLDRK pc3  
P18827**

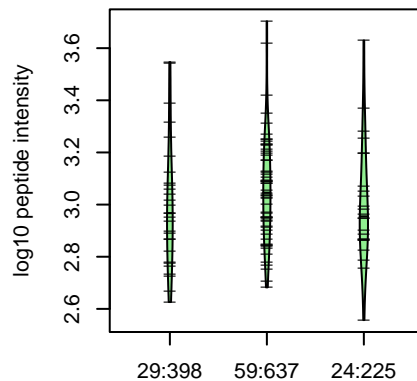

2:20371380:G:A\_A  
 $p = 0.58$ ,  $\beta = 0.0738$ ,  $N = 112$

**SDC1 : NP2  
P18827**

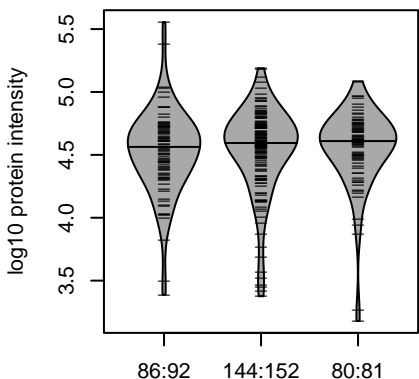

2:20371380:G:A\_A  
 $p = 0.51$ ,  $\beta = 0.0509$ ,  $N = 310$

**EGEAVVLPEVEPGLTAR pc2  
E9PHH3;P18827**

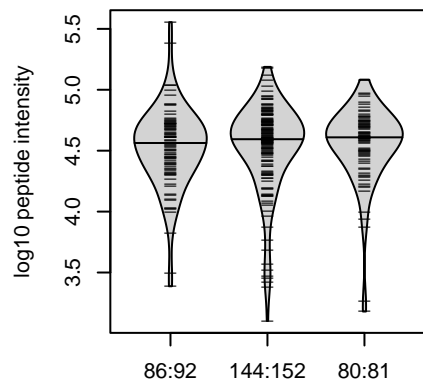

2:20371380:G:A\_A  
 $p = 0.52$ ,  $\beta = 0.049$ ,  $N = 310$

Assay Target: SDC1  
Olink UniProt: P18827  
UKB rsID: rs907866  
Proxy rsID: rs907866  
UKB SNP: 2:20371380:G:A  
Proxy SNP: 2:20371380:G:A  
UKB log10(p): 106.1  
UKB BETA: 0.131  
-:-:-  
1230:112:53

**IQGAP2 : NP1**  
**Q13576**

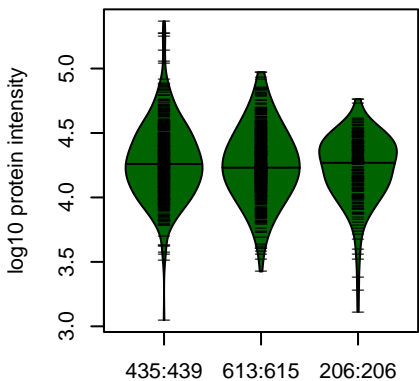

5:75930640:G:A\_G  
 $p = 0.086$ ,  $\beta = -0.0698$ ,  $N = 1254$

**TEISLVLTSK pc2**

**BI5KRM2;F5H7S7;Q13576;Q13576-2;C**

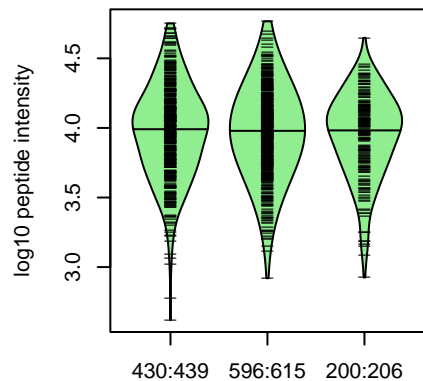

5:75930640:G:A\_G  
 $p = 0.34$ ,  $\beta = -0.0389$ ,  $N = 1226$

**GVLLDIDDLQTNQFK pc2**

**F5H7S7;Q13576;Q13576-2;Q13576;F5H7S7;H0YLE8;Q13576;Q13576-2;C**

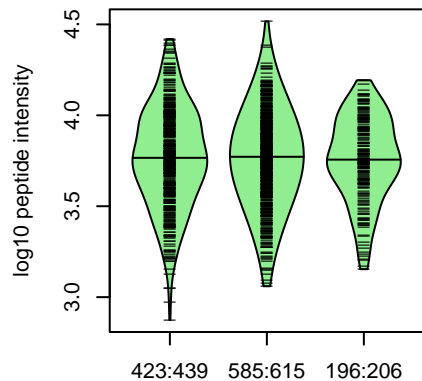

5:75930640:G:A\_G  
 $p = 0.57$ ,  $\beta = -0.0233$ ,  $N = 1204$

**LIFQMPQNK pc2**

**F5H7S7;Q13576;Q13576-2;Q13576;F5H7S7;H0YLE8;Q13576;Q13576-2;C**

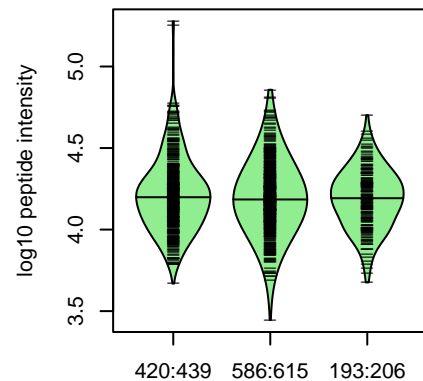

5:75930640:G:A\_G  
 $p = 0.51$ ,  $\beta = -0.0276$ ,  $N = 1199$

**LIIDVIR pc2**

**F5H7S7;Q13576;Q13576-2;Q13576;F5H7S7;H0YLE8;Q13576;Q13576-2;C**

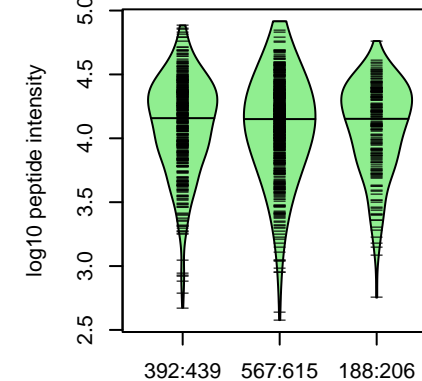

5:75930640:G:A\_G  
 $p = 0.36$ ,  $\beta = -0.0389$ ,  $N = 1147$

**IQGAP2 : NP1**  
**Q13576**

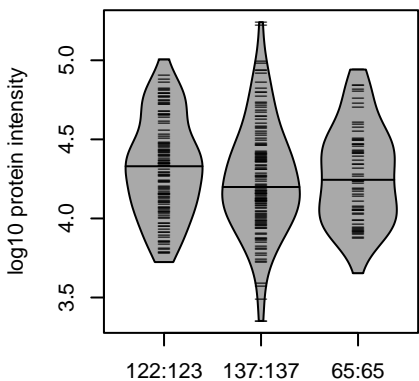

5:75930640:G:A\_G  
 $p = 0.084$ ,  $\beta = -0.128$ ,  $N = 324$

**YQDILNEIAK pc2**

**F5H7S7;Q13576;Q13576-2;Q13576;BI5KRM2;F5H7S7;Q13576;Q13576-2;C**

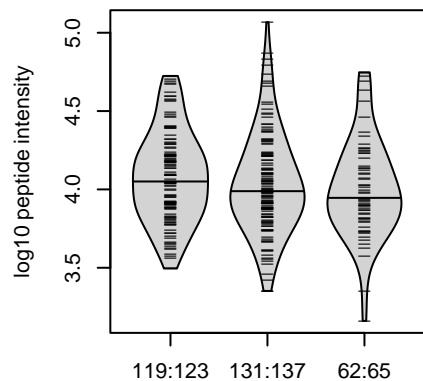

5:75930640:G:A\_G  
 $p = 0.063$ ,  $\beta = -0.14$ ,  $N = 312$

**TEISLVLTSK pc2**

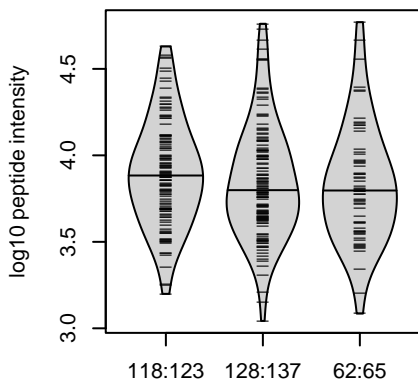

5:75930640:G:A\_G  
 $p = 0.076$ ,  $\beta = -0.134$ ,  $N = 308$

**LIIDVIR pc2**

**F5H7S7;Q13576;Q13576-2;Q13576;F5H7S7;H0YLE8;Q13576;Q13576-2;C**

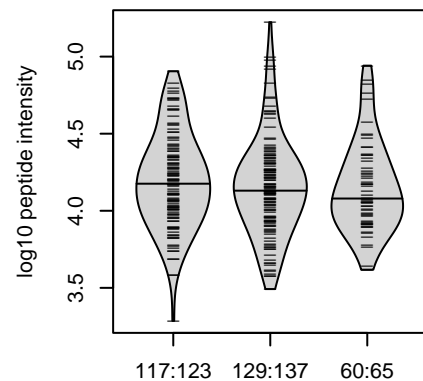

5:75930640:G:A\_G  
 $p = 0.18$ ,  $\beta = -0.103$ ,  $N = 306$

**LIFQMPQNK pc2**

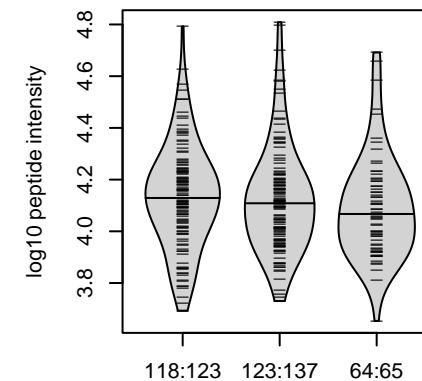

5:75930640:G:A\_G  
 $p = 0.13$ ,  $\beta = -0.114$ ,  $N = 305$

Assay Target: IQGAP2  
Olink UniProt: Q13576  
UKB rsID: rs10037254  
Proxy rsID: rs10037254  
UKB SNP: 5:75930640:G:A  
Proxy SNP: 5:75930640:G:A  
UKB log10(p): 105.1  
UKB BETA: 0.136  
-----  
1226:1204:1199:1147:1142:111

**ESSWTPESCLYK pc2**  
**rs2455230 REF**

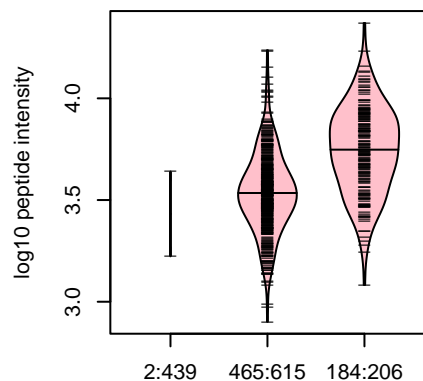

5:75930640:G:A\_G  
 $p = 1.5e-191$ ,  $\text{model} = \text{REC}$ ,  $N = 651$

**ESSWTPESCFYK pc2**  
**rs2455230 ALT**

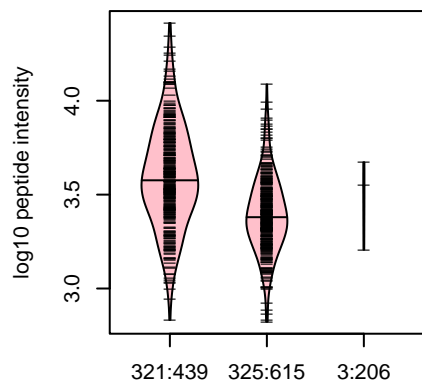

5:75930640:G:A\_G  
 $p = 7.5e-68$ ,  $\text{model} = \text{DOM}$ ,  $N = 649$

**QTFIDNTDSVVK pc2**  
**rs2431363 ALT**

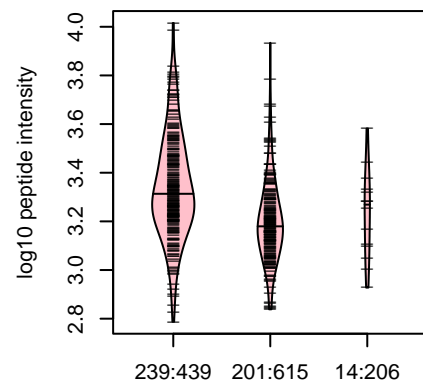

5:75930640:G:A\_G  
 $p = 6e-26$ ,  $\text{model} = \text{DOM}$ ,  $N = 454$

**QTFIDNTDSIVK pc2**  
**rs2431363 REF**

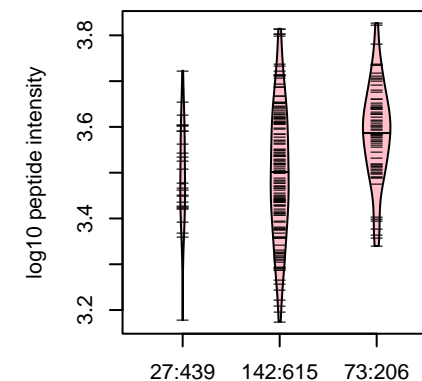

5:75930640:G:A\_G  
 $p = 3.5e-20$ ,  $\text{model} = \text{REC}$ ,  $N = 242$

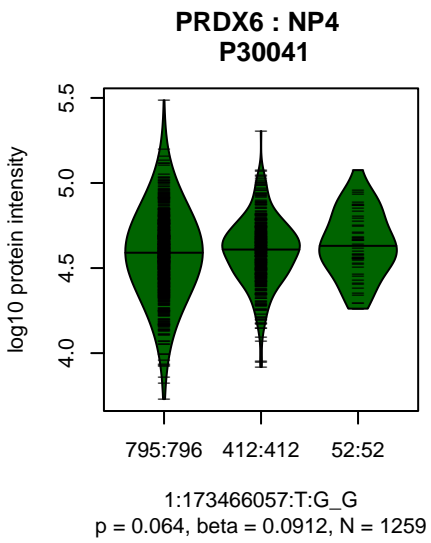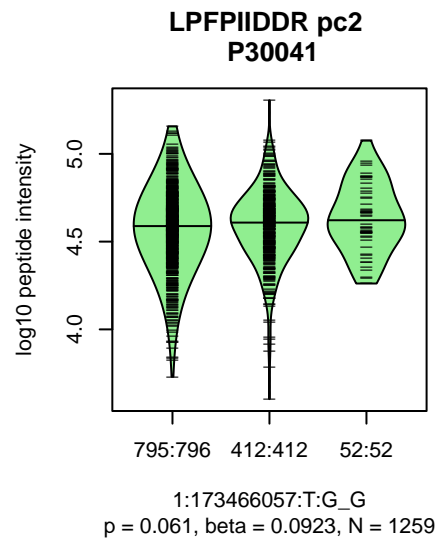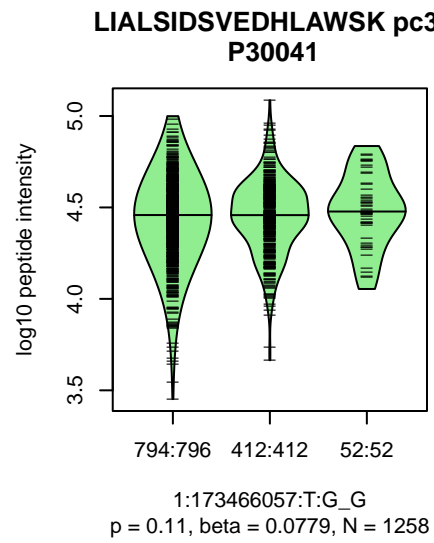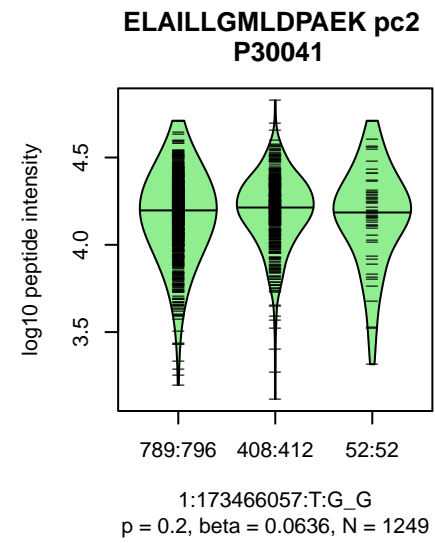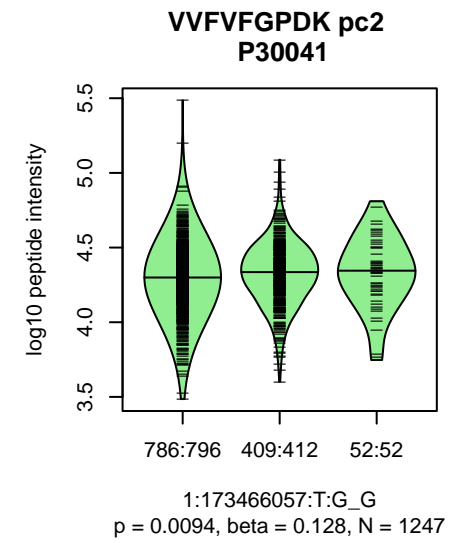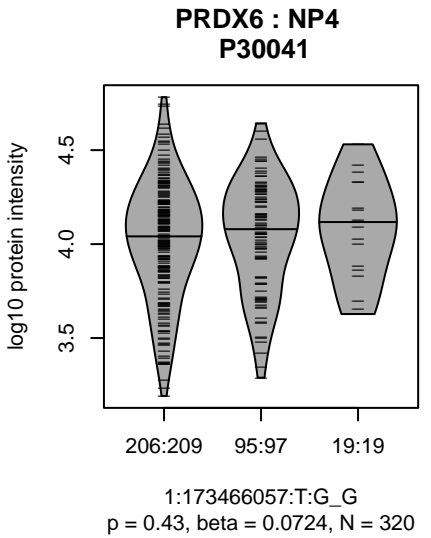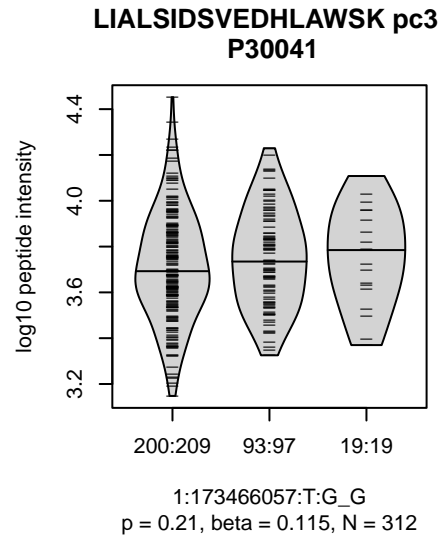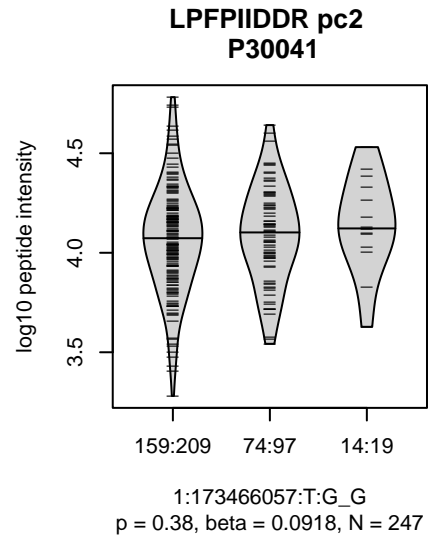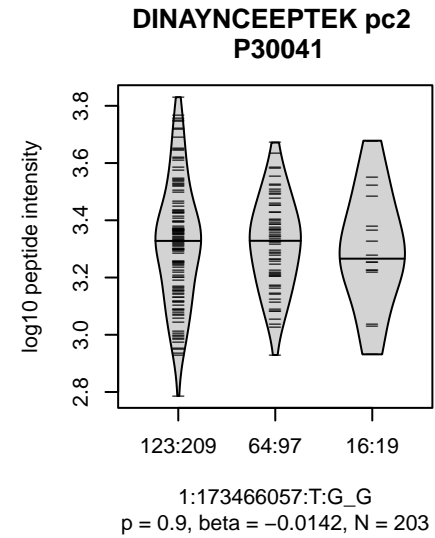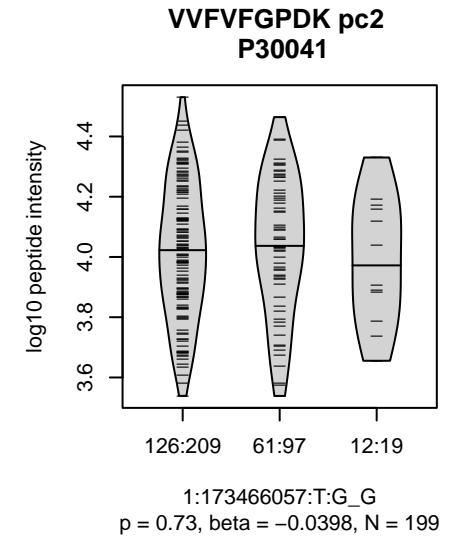

Assay Target: PRDX6  
 Olink UniProt: P30041  
 UKB rsID: rs7524592  
 Proxy rsID: rs7524592  
 UKB SNP: 1:173466057:T:G  
 Proxy SNP: 1:173466057:T:G  
 UKB log10(p): 104.6  
 UKB BETA: 0.169  
 -----  
 1259:1258:1249:1247:1154:112





**MCFD2 : NP2  
Q8NI22-2**

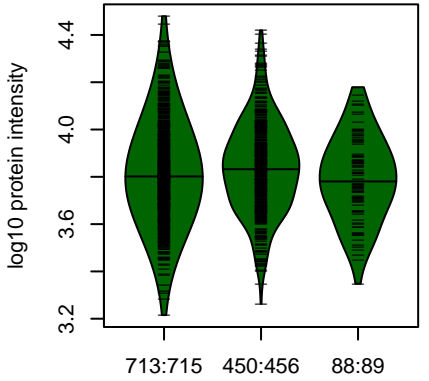

2:47152291:G:C\_G  
 $p = 0.99$ ,  $\beta = 0.00057$ ,  $N = 1251$

**MHDYDGNLLDGLELSTAITHVHK p1  
A0A3B3IU18;Q8NI22;Q8NI22-2;Q8NI22-3**

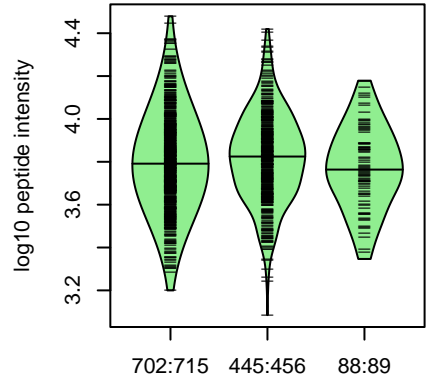

2:47152291:G:C\_G  
 $p = 0.95$ ,  $\beta = -0.00281$ ,  $N = 1235$

**NNDGYIDYAEFAK pc2  
Q8NI22;Q8NI22-2;Q8NI22-3**

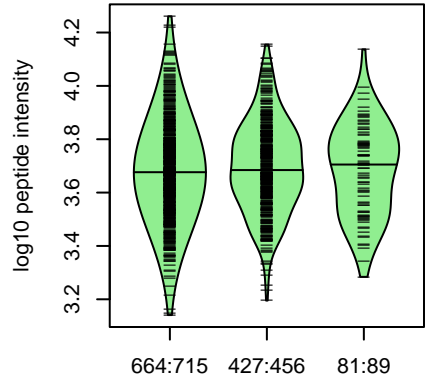

2:47152291:G:C\_G  
 $p = 0.61$ ,  $\beta = 0.0235$ ,  $N = 1172$

**MCFD2 : NP2  
Q8NI22-2**

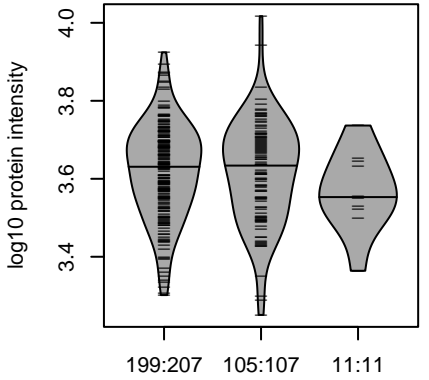

2:47152291:G:C\_G  
 $p = 0.56$ ,  $\beta = -0.0589$ ,  $N = 315$

**MHDYDGNLLDGLELSTAITHVHK p1  
A0A3B3IU18;Q8NI22;Q8NI22-2;Q8NI22-3**

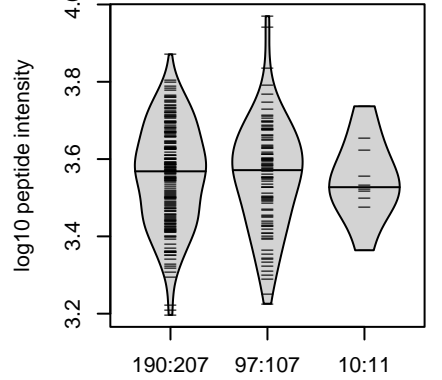

2:47152291:G:C\_G  
 $p = 0.95$ ,  $\beta = 0.00658$ ,  $N = 297$

**NNDGYIDYAEFAK pc2  
Q8NI22;Q8NI22-2;Q8NI22-3**

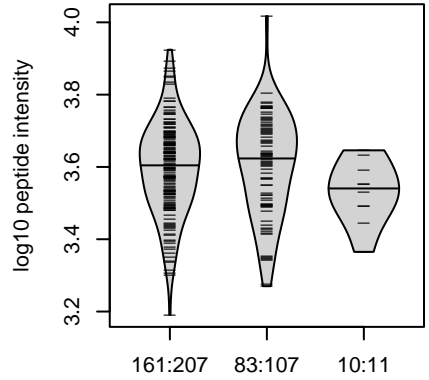

2:47152291:G:C\_G  
 $p = 0.67$ ,  $\beta = -0.0472$ ,  $N = 254$

Assay Target: MCFD2  
Olink UniProt: Q8NI22  
UKB rsID: rs6419615  
Proxy rsID: rs6419615  
UKB SNP: 2:47152291:G:C  
Proxy SNP: 2:47152291:G:C  
UKB log10(p): 99.3  
UKB BETA: -0.146  
--:  
1235:1172



**CDH23 : NP1  
Q9H251**

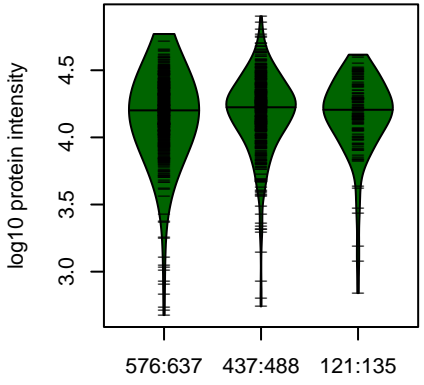

10:73472882:C:T\_T  
p = 0.29, beta = 0.0466, N = 1134

**PPNGTILHIR pc2  
Q9H251;Q9H251-7;Q9H251-9 i7WYR8;A0A0A0MS94;B1AVV0;Q8N5I**

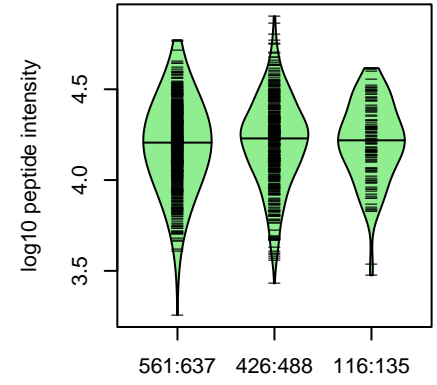

10:73472882:C:T\_T  
p = 0.16, beta = 0.063, N = 1103

**ENEPSVTQLVR pc2  
i7WYR8;A0A0A0MS94;B1AVV0;Q8N5I**

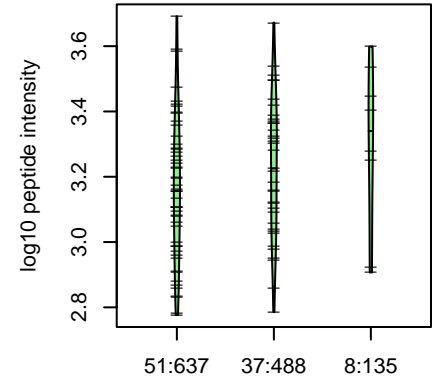

10:73472882:C:T\_T  
p = 0.16, beta = 0.214, N = 96

**IDAITGVITVQGLVDREK pc3  
Q9H251**

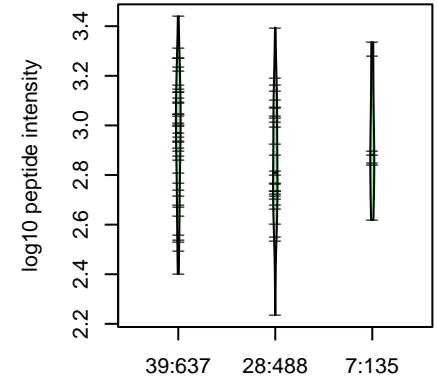

10:73472882:C:T\_T  
p = 0.64, beta = -0.0804, N = 74

**IVVSVTDCGRPLK pc3  
i7WYR8;A0A0A0MS94;B1AVV0;Q8N5I**

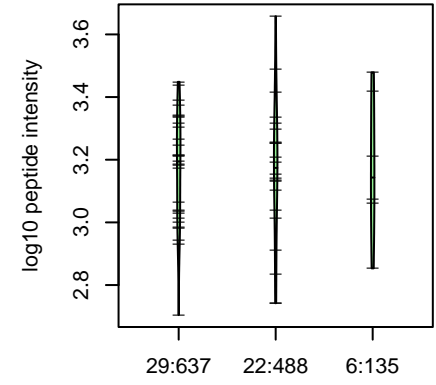

10:73472882:C:T\_T  
p = 0.44, beta = 0.146, N = 57

Assay Target: CDH23  
Olink UniProt: Q9H251  
UKB rsID: rs2166631  
Proxy rsID: rs2166631  
UKB SNP: 10:73472882:C:T  
Proxy SNP: 10:73472882:C:T  
UKB log10(p): 96.8  
UKB BETA: -0.157  
- - - - - \* - - - - -  
1103:96:74:57:55:42:39:38:36:3

**SEMA3F : NP1  
Q13275**

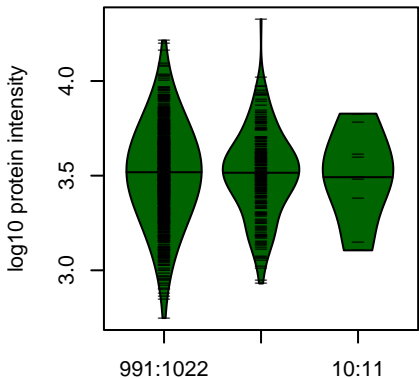

3:50250747:C:T\_T  
p = 0.77, beta = -0.0197, N = 1225

**GLYSTATENNFK pc2  
C9JPG5;Q13275;Q13275-2**

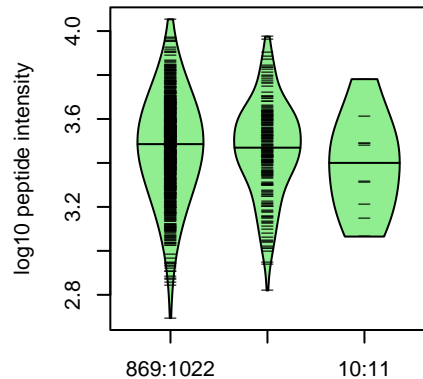

3:50250747:C:T\_T  
p = 0.27, beta = -0.0791, N = 1074

**NAVESVQYGVAGSAAFLEQCPR pc  
C9JPG5;Q13275;Q13275-2**

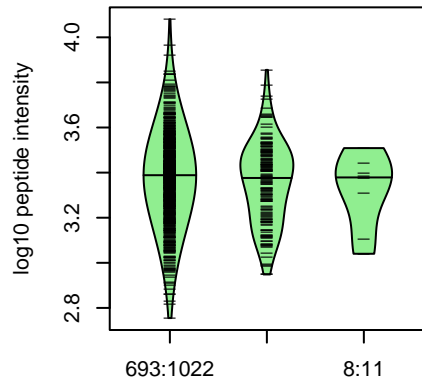

3:50250747:C:T\_T  
p = 0.25, beta = -0.0924, N = 856

**VQLHVLGR pc2  
C9JPG5;Q13275;Q13275-2**

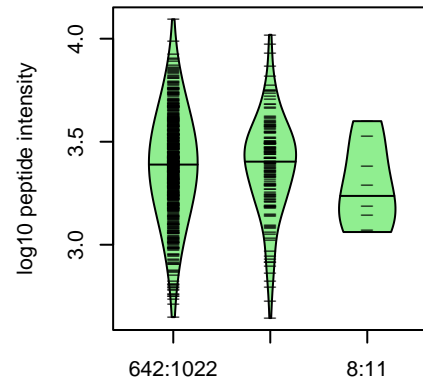

3:50250747:C:T\_T  
p = 0.79, beta = -0.0215, N = 801

**TEQGLLLR pc2  
C9JPG5;Q13275;Q13275-2**

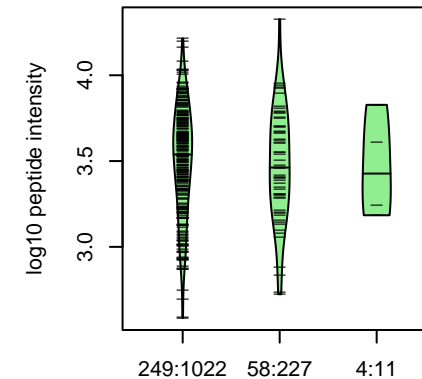

3:50250747:C:T\_T  
p = 0.61, beta = -0.0652, N = 311

**SEMA3F : NP1  
Q13275**

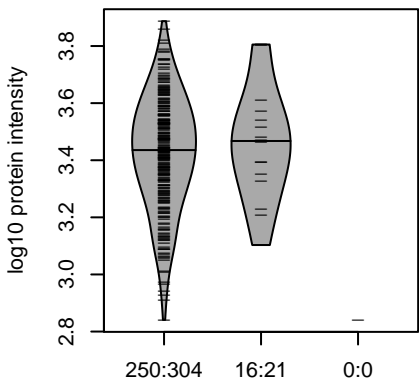

3:50250747:C:T\_T  
p = 0.57, beta = 0.143, N = 266

**TEQGLLLR pc2  
C9JPG5;Q13275;Q13275-2**

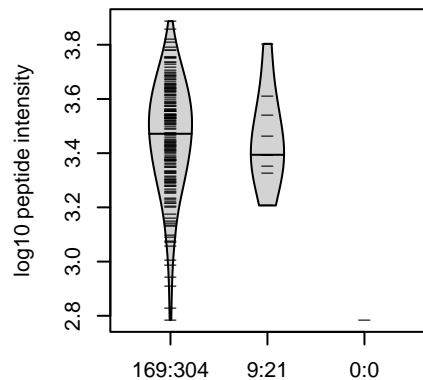

3:50250747:C:T\_T  
p = 0.92, beta = -0.0336, N = 178

**GLYSTATENNFK pc2  
C9JPG5;Q13275;Q13275-2**

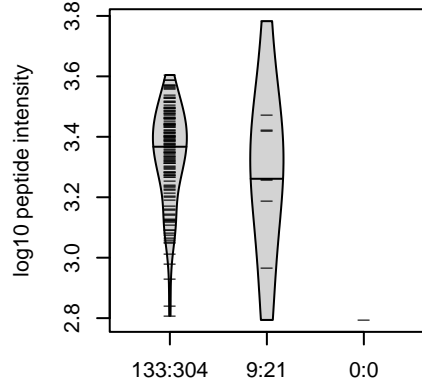

3:50250747:C:T\_T  
p = 0.33, beta = -0.33, N = 142

**VQLHVLGR pc2  
C9JPG5;Q13275;Q13275-2**

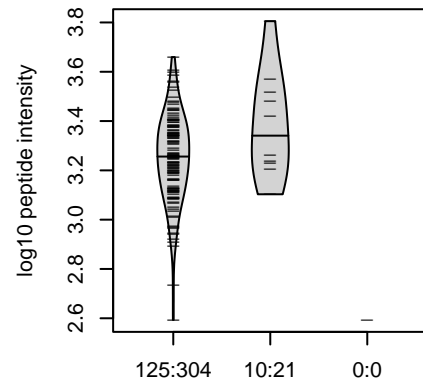

3:50250747:C:T\_T  
p = 0.085, beta = 0.55, N = 135

Assay Target: SEMA3F  
Olink UniProt: Q13275  
UKB rsID: rs74461473  
Proxy rsID: rs74461473  
UKB SNP: 3:50250747:C:T  
Proxy SNP: 3:50250747:C:T  
UKB log10(p): 95.6  
UKB BETA: -0.201  
- - - - -  
1074:856:801:311:24

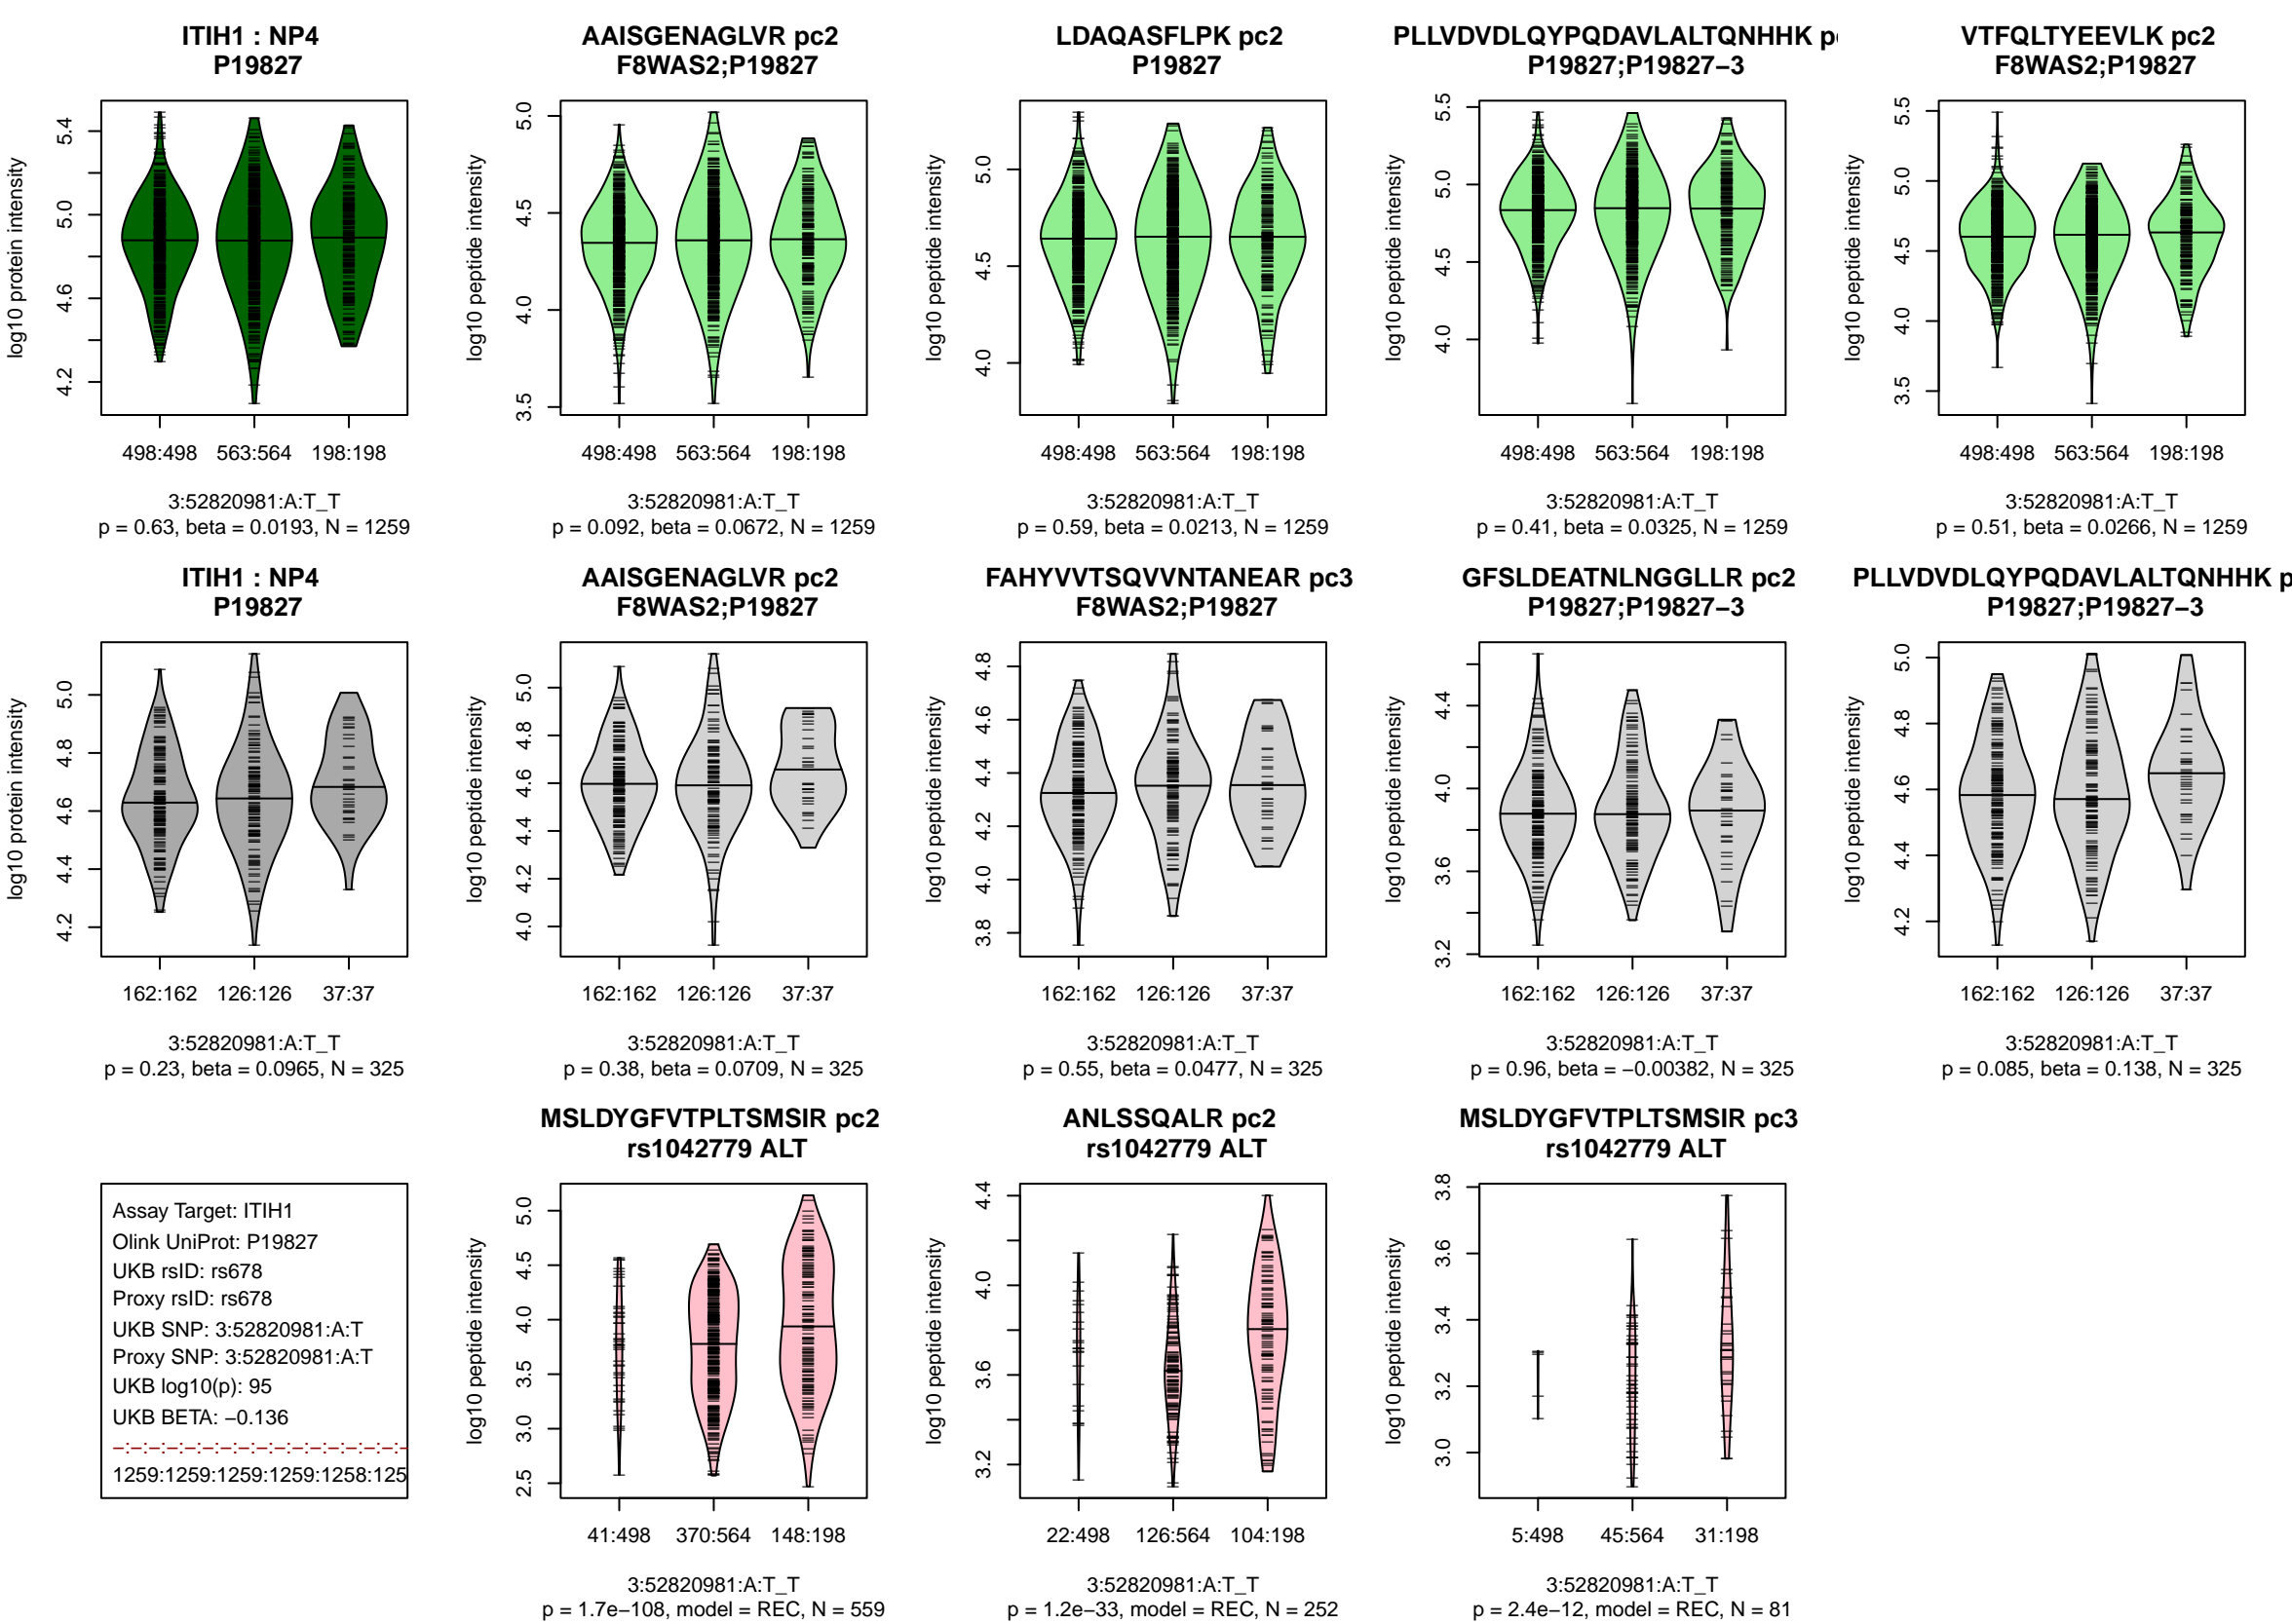



**TTR : NP4  
P02766**

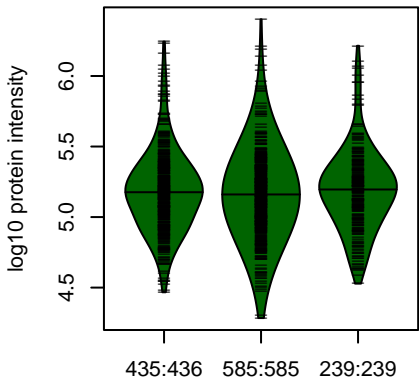

18:29142206:T:C\_T  
p = 0.99, beta = -0.000352, N = 1259

**AADDTWEPFASGK pc2  
A0A087WT59;P02766**

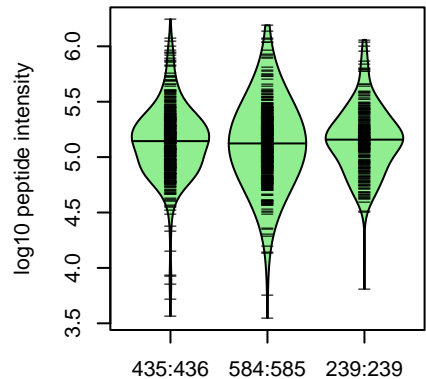

18:29142206:T:C\_T  
p = 0.9, beta = 0.00513, N = 1258

**ALGISPFHEHAIEVVFTANDSGPR pc  
A0A087WT59;P02766**

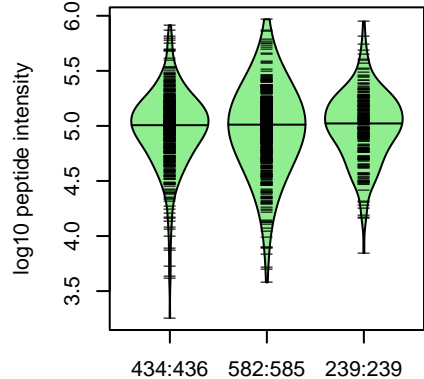

18:29142206:T:C\_T  
p = 0.66, beta = 0.0175, N = 1255

**GSPAINVAVHVFR pc3  
A0A087WT59;P02766**

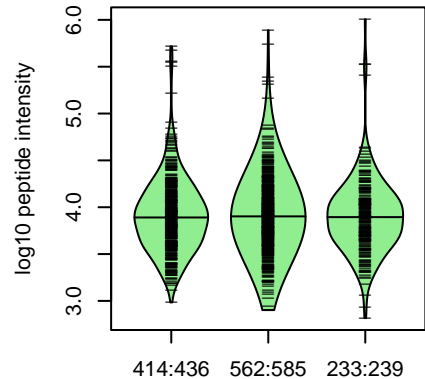

18:29142206:T:C\_T  
p = 0.92, beta = -0.00411, N = 1209

**TSESGELHGLTTEEEFVEGIYK pc3  
A0A087WT59;P02766**

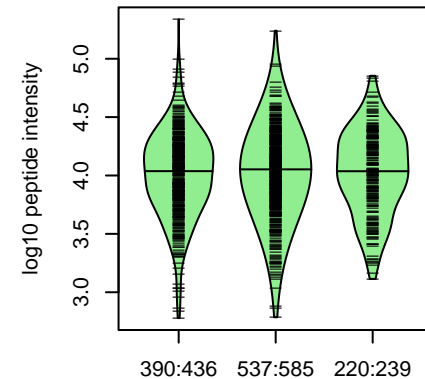

18:29142206:T:C\_T  
p = 0.64, beta = 0.0194, N = 1147

**TTR : NP4  
A0A087WT59;P02766**

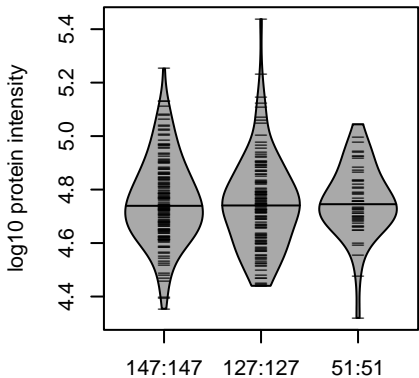

18:29142206:T:C\_T  
p = 0.68, beta = 0.0314, N = 325

**AADDTWEPFASGK pc2  
A0A087WT59;P02766**

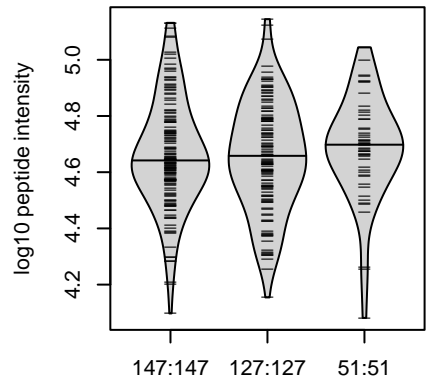

18:29142206:T:C\_T  
p = 0.26, beta = 0.0853, N = 325

**ALGISPFHEHAIEVVFTANDSGPR pc  
A0A087WT59;P02766**

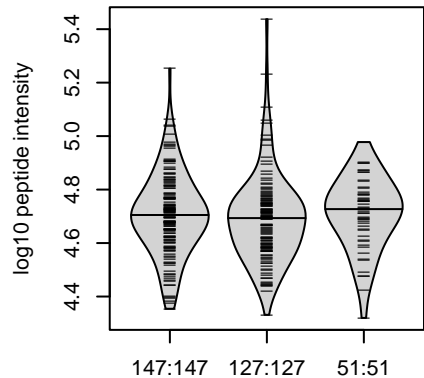

18:29142206:T:C\_T  
p = 0.66, beta = 0.0334, N = 325

**GSPAINVAVHVFR pc2  
A0A087WT59;P02766**

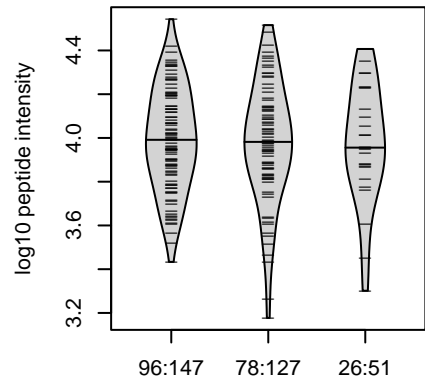

18:29142206:T:C\_T  
p = 0.93, beta = -0.00902, N = 200

**TSESGELHGLTTEEEFVEGIYK pc3  
A0A087WT59;P02766**

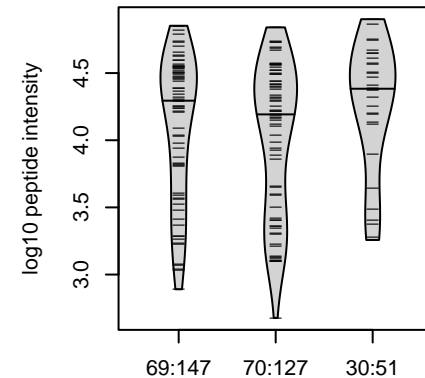

18:29142206:T:C\_T  
p = 0.12, beta = 0.161, N = 169

Assay Target: TTR  
Olink UniProt: P02766  
UKB rsID: rs1667229  
Proxy rsID: rs1667229  
UKB SNP: 18:29142206:T:C  
Proxy SNP: 18:29142206:T:C  
UKB log10(p): 94.2  
UKB BETA: 0.121  
-----NA:NA:N  
1258:1255:1209:1147:1111:978





**SCGB3A1 : NP4  
Q96QR1**

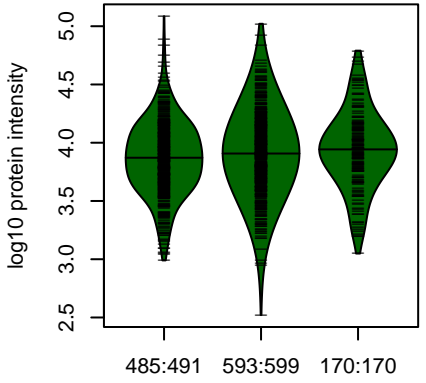

5:180019237:T:C\_C  
 $p = 0.02$ ,  $\beta = 0.0964$ ,  $N = 1248$

**LLLSSLGIPVNHLEIGSQK pc3  
Q96QR1**

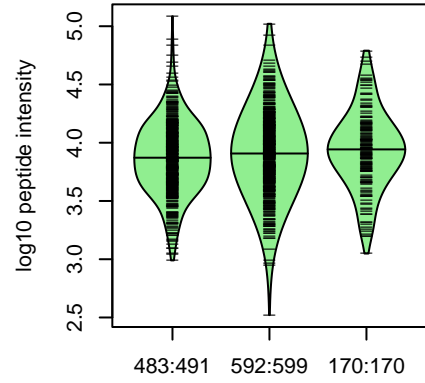

5:180019237:T:C\_C  
 $p = 0.027$ ,  $\beta = 0.0921$ ,  $N = 1245$

**CVAELGPQAVGAVK pc2  
Q96QR1**

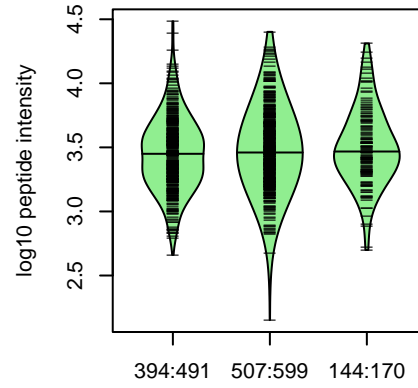

5:180019237:T:C\_C  
 $p = 0.1$ ,  $\beta = 0.0743$ ,  $N = 1045$

**SCGB3A1 : NP4  
Q96QR1**

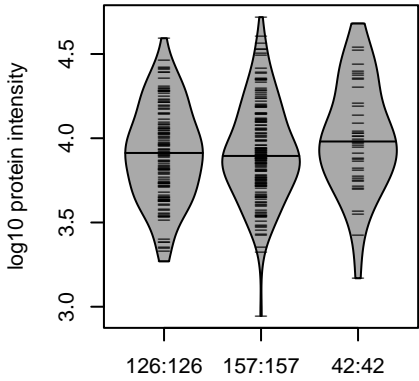

5:180019237:T:C\_C  
 $p = 0.22$ ,  $\beta = 0.1$ ,  $N = 325$

**LLLSSLGIPVNHLEIGSQK pc3  
Q96QR1**

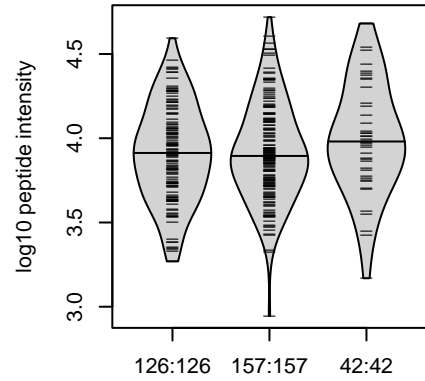

5:180019237:T:C\_C  
 $p = 0.25$ ,  $\beta = 0.0942$ ,  $N = 325$

**CVAELGPQAVGAVK pc2  
Q96QR1**

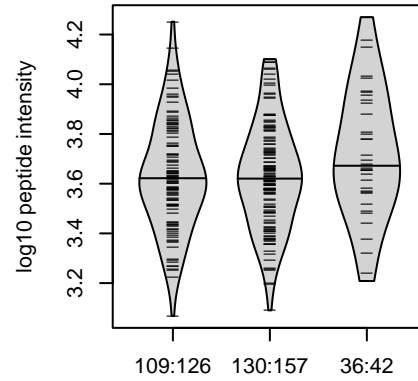

5:180019237:T:C\_C  
 $p = 0.2$ ,  $\beta = 0.113$ ,  $N = 275$

Assay Target: SCGB3A1  
Olink UniProt: Q96QR1  
UKB rsID: rs307802  
Proxy rsID: rs307802  
UKB SNP: 5:180019237:T:C  
Proxy SNP: 5:180019237:T:C  
UKB log10(p): 91.5  
UKB BETA: 0.123  
--:  
1245:1045



**CD84 : NP4**  
**Q9UIB8-2**

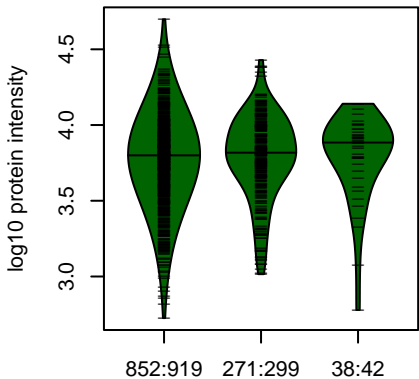

1:160556188:C:T\_C  
p = 0.59, beta = 0.0299, N = 1161

**TSVAYVTPGDSETAPVVTVTHR pc3**  
**Q9UIB8;Q9UIB8-2;Q9UIB8-3;Q9UIB**

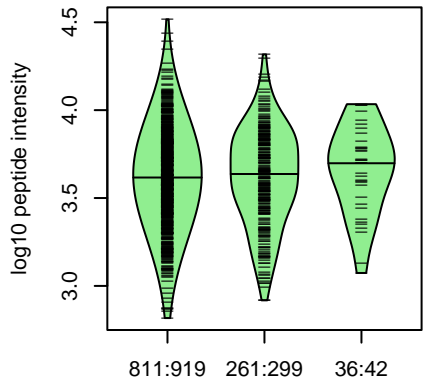

1:160556188:C:T\_C  
p = 0.95, beta = 0.00327, N = 1108

**IHALGPNYNLVISDLR pc3**  
**Q9UIB8;Q9UIB8-2;Q9UIB8-3;Q9UIB**

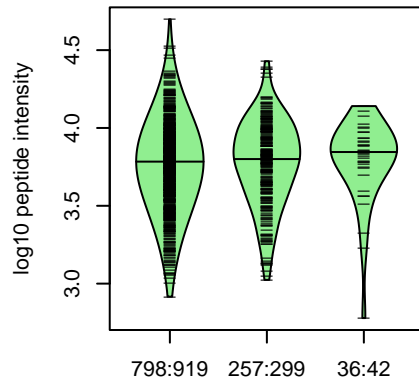

1:160556188:C:T\_C  
p = 0.33, beta = 0.0556, N = 1091

**IYDEILQSK pc2**

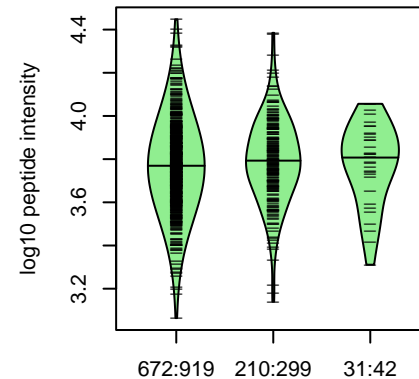

1:160556188:C:T\_C  
p = 0.48, beta = 0.0446, N = 913

**ADINTQADPYTTTK pc2**  
**Q9UIB8;Q9UIB8-2;Q9UIB8-3;Q9UIB**

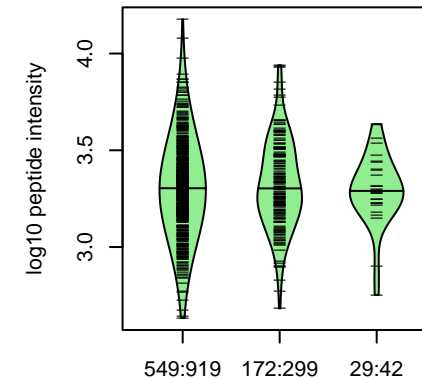

1:160556188:C:T\_C  
p = 0.57, beta = 0.0388, N = 750

**CD84 : NP4**  
**Q9UIB8;Q9UIB8-2;Q9UIB8-3**

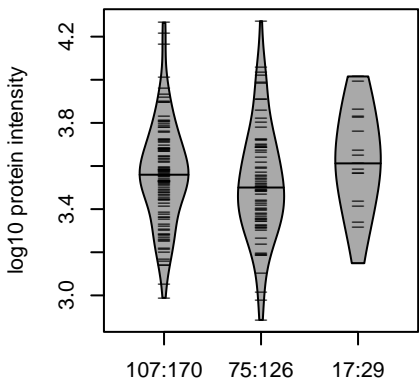

1:160556188:C:T\_C  
p = 0.95, beta = 0.00714, N = 199

**TSVAYVTPGDSETAPVVTVTHR pc3**  
**Q9UIB8;Q9UIB8-2;Q9UIB8-3;Q9UIB**

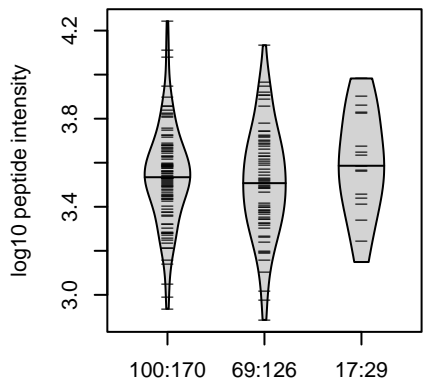

1:160556188:C:T\_C  
p = 0.67, beta = 0.0473, N = 186

**IHALGPNYNLVISDLR pc3**  
**Q9UIB8;Q9UIB8-2;Q9UIB8-3;Q9UIB**

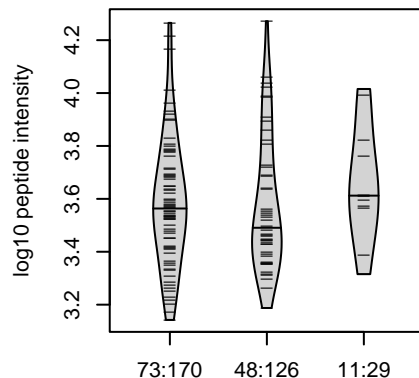

1:160556188:C:T\_C  
p = 0.62, beta = 0.0648, N = 132

**ADINTQADPYTTTK pc2**  
**Q9UIB8;Q9UIB8-2;Q9UIB8-3;Q9UIB**

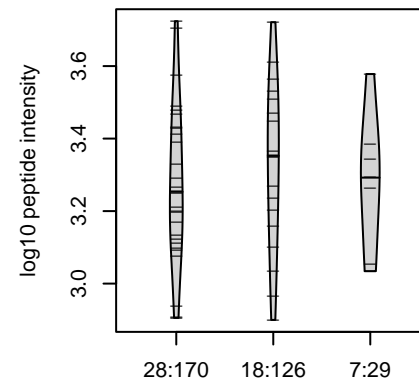

1:160556188:C:T\_C  
p = 0.48, beta = 0.131, N = 53

Assay Target: CD84  
Olink UniProt: Q9UIB8  
UKB rsID: rs200682634  
Proxy rsID: rs7539149  
UKB SNP: 1:160560109:CAT:C  
Proxy SNP: 1:160556188:C:T  
UKB log10(p): 88.6  
UKB BETA: -0.211  
-----  
1108:1091:913:750:715:409:16

**NCS1 : NP2  
P62166**

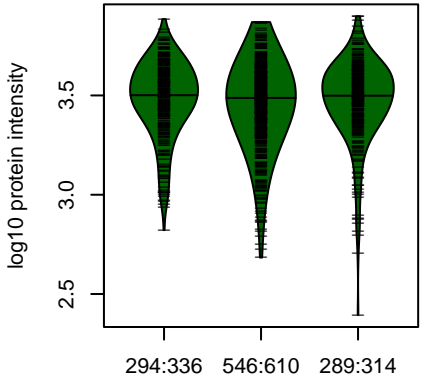

9:132995768:G:A\_A  
p = 0.36, beta = -0.0375, N = 1129

**DGRIEFSEFIQALSVTSR pc3  
P62166-2;P62166**

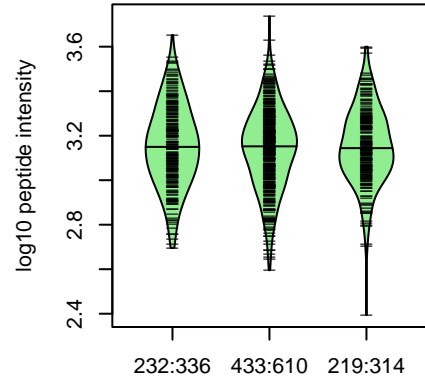

9:132995768:G:A\_A  
p = 0.74, beta = -0.0156, N = 884

**FATFVFNFVDENK pc2  
P62166-2;P62166**

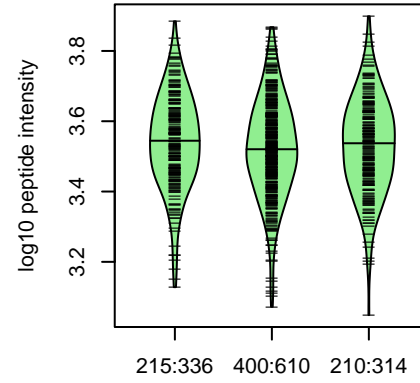

9:132995768:G:A\_A  
p = 0.47, beta = -0.035, N = 825

**LYLDNDGYITR pc2  
P62166-2;P62166**

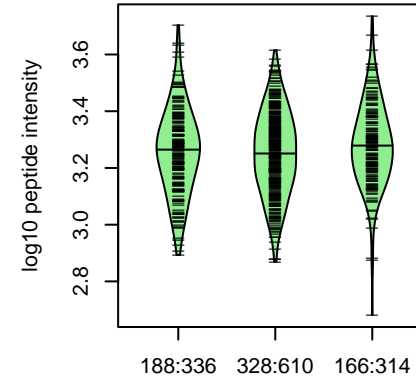

9:132995768:G:A\_A  
p = 0.13, beta = 0.0798, N = 682

**LTLQEFQEGSK pc2  
P62166-2;P62166**

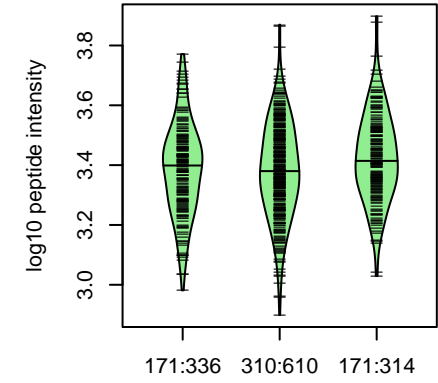

9:132995768:G:A\_A  
p = 0.049, beta = 0.106, N = 652

Assay Target: NCS1  
Olink UniProt: P62166  
UKB rsID: rs1054879  
Proxy rsID: rs1054879  
UKB SNP: 9:132995768:G:A  
Proxy SNP: 9:132995768:G:A  
UKB log10(p): 88  
UKB BETA: 0.11  
-:-:-:-  
884:825:682:652

**LTBP2 : NP2**  
**G3V3X5;Q14767**

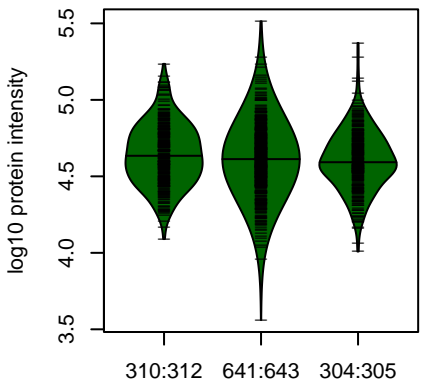

14:75104905:G:A\_A  
 $p = 0.077$ ,  $\beta = -0.0711$ ,  $N = 1255$

**CTNLEGSFR pc2**  
**G3V3X5;G3V511;Q14767**

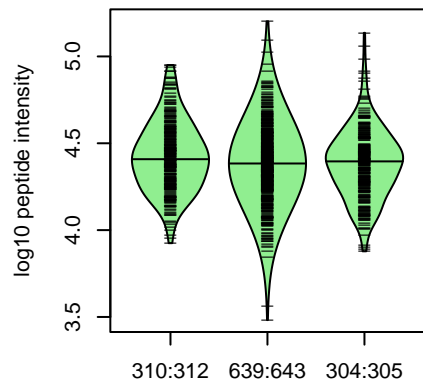

14:75104905:G:A\_A  
 $p = 0.049$ ,  $\beta = -0.079$ ,  $N = 1253$

**AISMLQGLCYR pc2**  
**G3V3X5;G3V511;Q14767**

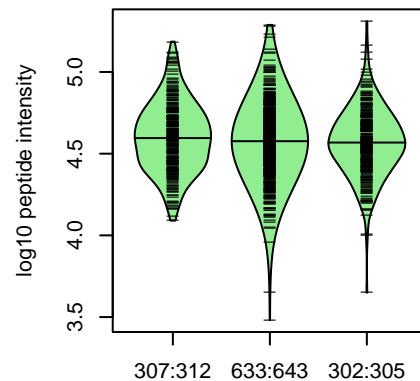

14:75104905:G:A\_A  
 $p = 0.2$ ,  $\beta = -0.0523$ ,  $N = 1242$

**SLGPGTCTLPLAQR pc2**  
**G3V3X5;G3V511;Q14767**

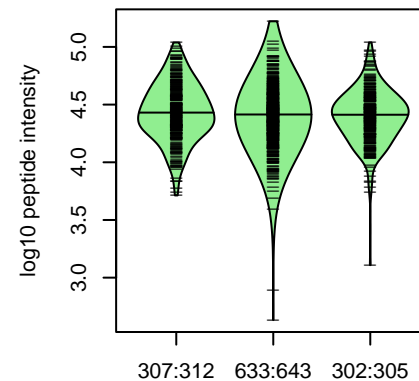

14:75104905:G:A\_A  
 $p = 0.25$ ,  $\beta = -0.0469$ ,  $N = 1242$

**CPLPGTEAFR pc2**  
**G3V3X5;G3V511;Q14767**

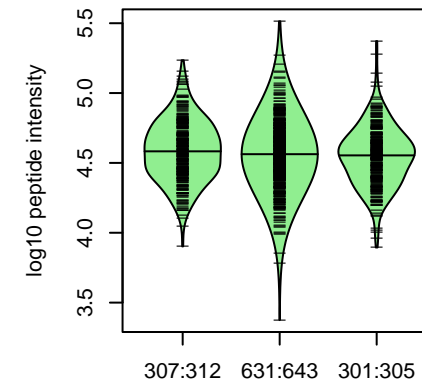

14:75104905:G:A\_A  
 $p = 0.097$ ,  $\beta = -0.067$ ,  $N = 1239$

**LTBP2 : NP2**  
**G3V3X5;Q14767**

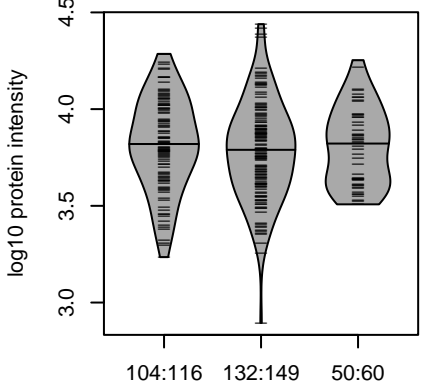

14:75104905:G:A\_A  
 $p = 0.16$ ,  $\beta = -0.117$ ,  $N = 286$

**STPLGQQPAPR pc2**  
**G3V3X5;G3V511;Q14767**

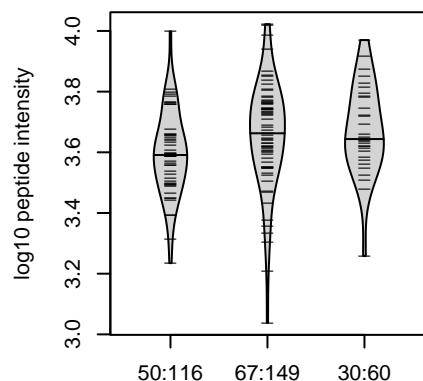

14:75104905:G:A\_A  
 $p = 0.26$ ,  $\beta = 0.126$ ,  $N = 147$

**IVFTPTICK pc2**  
**G3V3X5;G3V511;Q14767**

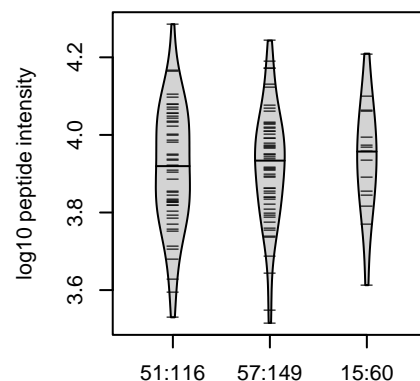

14:75104905:G:A\_A  
 $p = 0.77$ ,  $\beta = 0.0387$ ,  $N = 123$

**AQPGWGSPR pc2**  
**G3V3X5;G3V511;Q14767**

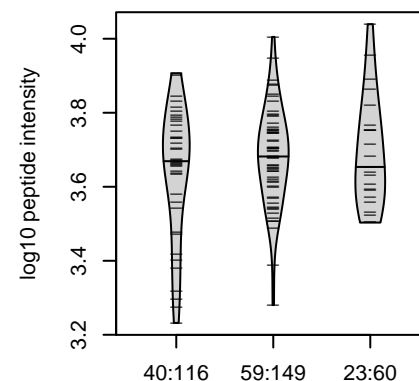

14:75104905:G:A\_A  
 $p = 0.85$ ,  $\beta = 0.0236$ ,  $N = 122$

**EQDAPVAGLQPVER pc2**  
**G3V3X5;G3V511;Q14767**

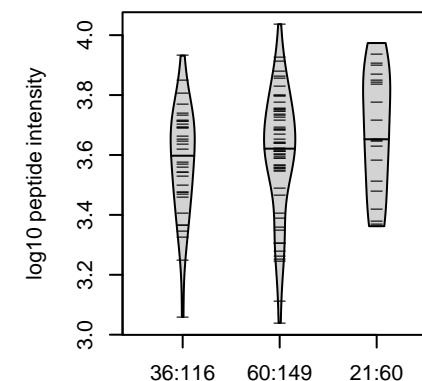

14:75104905:G:A\_A  
 $p = 0.17$ ,  $\beta = 0.179$ ,  $N = 117$

Assay Target: LTBP2  
Olink UniProt: Q14767  
UKB rsID: rs888414  
Proxy rsID: rs888414  
UKB SNP: 14:75104905:G:A  
Proxy SNP: 14:75104905:G:A  
UKB log10(p): 86.9  
UKB BETA: -0.103  
-----  
1253:1242:1242:1239:1237:122

**DNAJA4 : NP3**  
**Q8WW22-2**

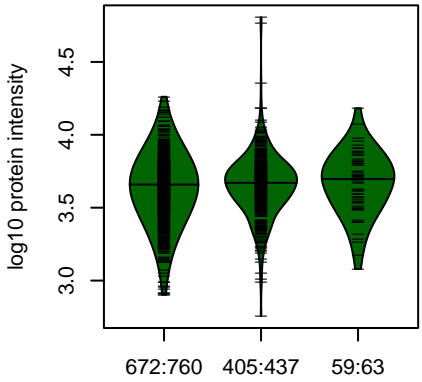

15:78557720:C:G\_G  
p = 0.054, beta = 0.0958, N = 1136

**LISQAYEVLSDPK pc2**  
**F5H170;F8WF76;Q8WW22;Q8WW22-DE6;F5H170;Q8WW22;Q8WW22-2;Q8F5H170;Q8WW22;Q8WW22-2;Q8WW22-3**

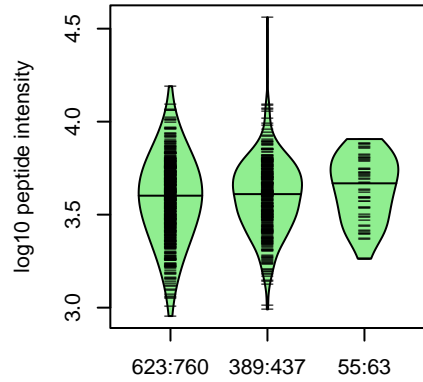

15:78557720:C:G\_G  
p = 0.091, beta = 0.0869, N = 1067

**NVVHQLSVTLEDLYNGVTK pc3**

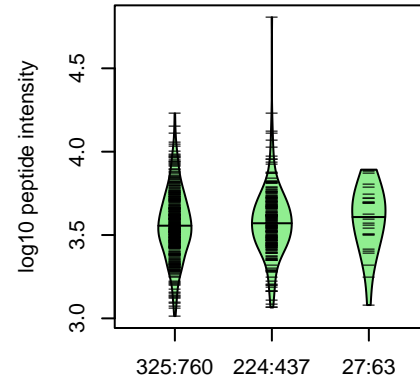

15:78557720:C:G\_G  
p = 0.29, beta = 0.0742, N = 576

**IIEVHVEK pc2**

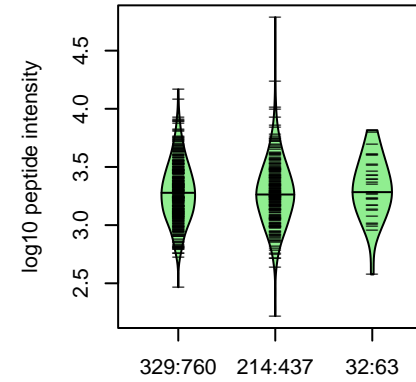

15:78557720:C:G\_G  
p = 0.9, beta = 0.00825, N = 575

**ITDDMDQVELK pc2**  
**Q8WW22;Q8WW22-2;Q8WW22-3**

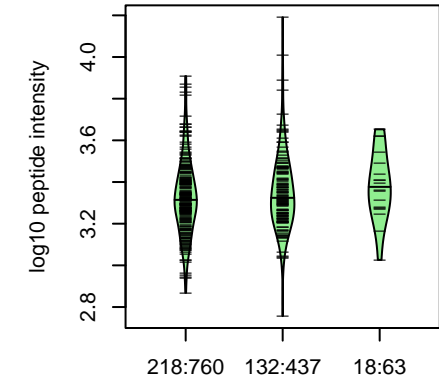

15:78557720:C:G\_G  
p = 0.041, beta = 0.179, N = 368

**DNAJA4 : NP3**  
**Q8WW22;Q8WW22-2**

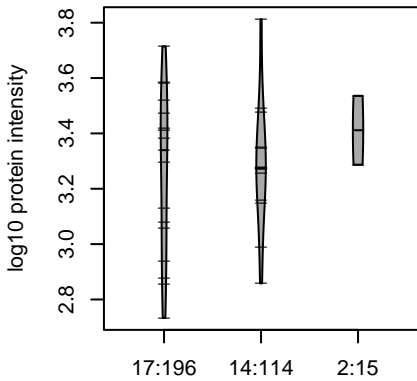

15:78557720:C:G\_G  
p = 0.6, beta = 0.141, N = 33

**LISQAYEVLSDPK pc2**  
**F5H170;F8WF76;Q8WW22;Q8WW22-2**

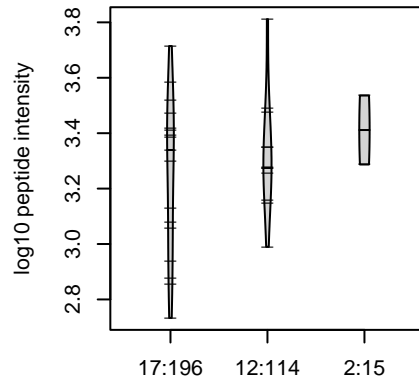

15:78557720:C:G\_G  
p = 0.54, beta = 0.167, N = 31

Assay Target: DNAJA4  
Olink UniProt: Q8WW22  
UKB rsID: rs62007832  
Proxy rsID: rs62007832  
UKB SNP: 15:78557720:C:G  
Proxy SNP: 15:78557720:C:G  
UKB log10(p): 86  
UKB BETA: 0.143  
-----NA:N  
1067:576:575:368:271:250:205:

**GP5 : NP4  
P40197**

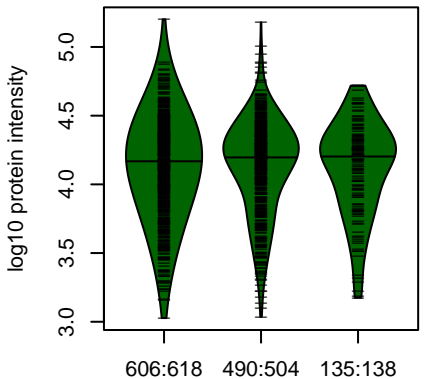

3:194120998:A:G\_G  
p = 0.56, beta = -0.0248, N = 1231

**MVLLQLFLDHNALR pc3  
P40197**

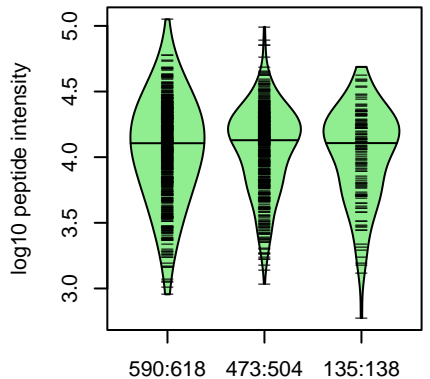

3:194120998:A:G\_G  
p = 0.28, beta = -0.0458, N = 1198

**YLGVTLSPR pc2  
P40197**

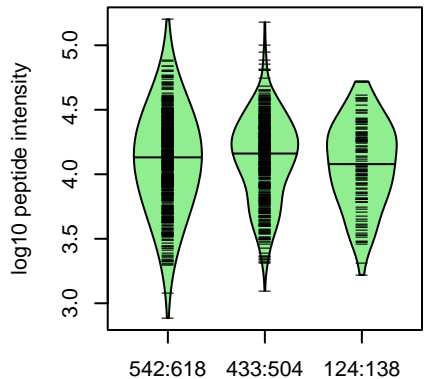

3:194120998:A:G\_G  
p = 0.87, beta = -0.00714, N = 1099

**LVSLDSGLLNSLGLTELQFHR pc3  
P40197**

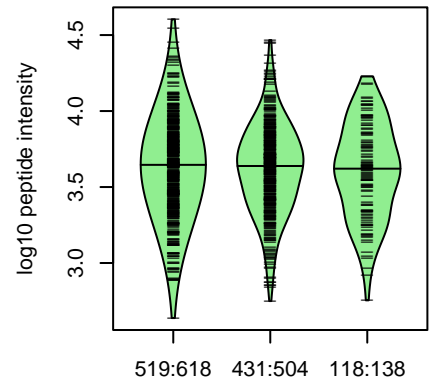

3:194120998:A:G\_G  
p = 0.33, beta = -0.0441, N = 1068

**DAAQCSGGDVAR pc2  
P40197**

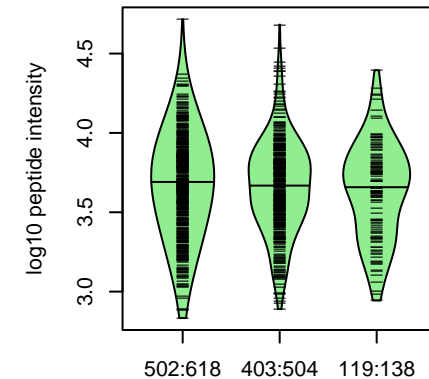

3:194120998:A:G\_G  
p = 0.37, beta = -0.0408, N = 1024

**GP5 : NP4  
P40197**

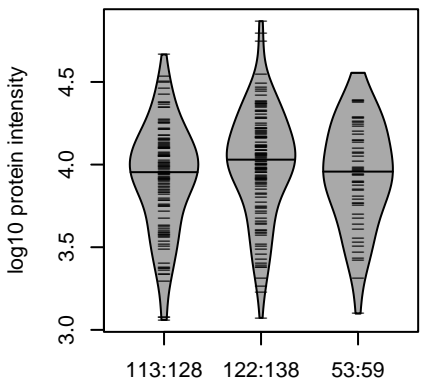

3:194120998:A:G\_G  
p = 0.3, beta = 0.0826, N = 288

**MVLLQLFLDHNALR pc3  
P40197**

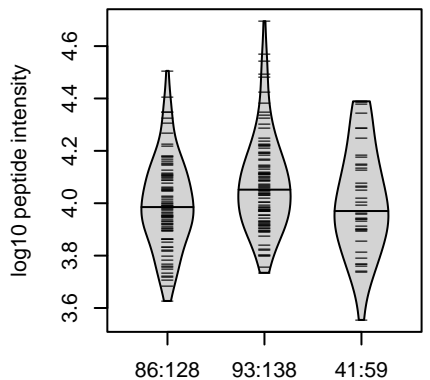

3:194120998:A:G\_G  
p = 0.11, beta = 0.145, N = 220

**DAAQCSGGDVAR pc2  
P40197**

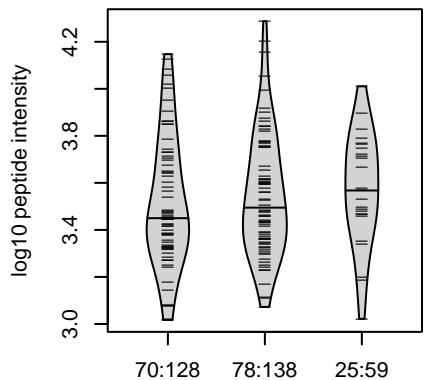

3:194120998:A:G\_G  
p = 0.31, beta = 0.109, N = 173

**YLGVTLSPR pc2  
P40197**

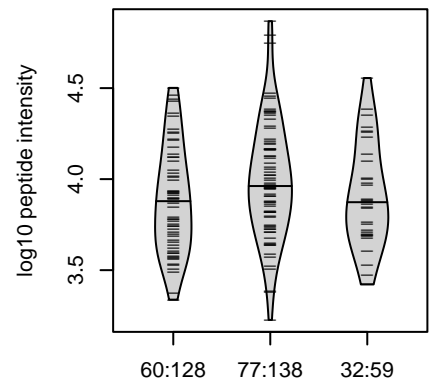

3:194120998:A:G\_G  
p = 0.33, beta = 0.102, N = 169

**LVSLDSGLLNSLGLTELQFHR pc3  
P40197**

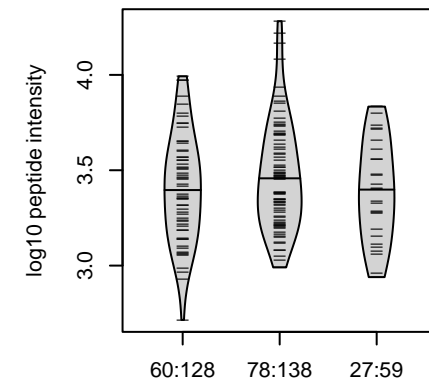

3:194120998:A:G\_G  
p = 0.77, beta = 0.0324, N = 165

Assay Target: GP5  
Olink UniProt: P40197  
UKB rsID: rs544985059  
Proxy rsID: rs1466733  
UKB SNP: 3:194121175:G:T  
Proxy SNP: 3:194120998:A:G  
UKB log10(p): 85.5  
UKB BETA: -0.145  
-----  
1198:1099:1068:1024:815:785:7

**CDHR2 : NP2  
Q9BYE9**

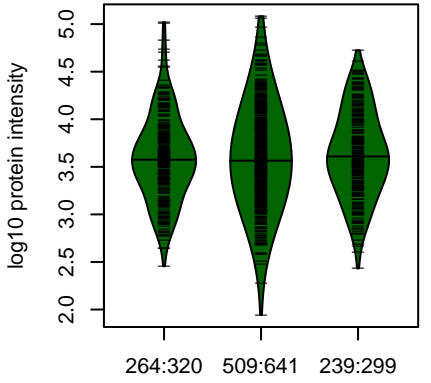

5:175945908:C:G\_C  
 $p = 0.072$ ,  $\beta = 0.0799$ ,  $N = 1012$

**TFVIIPELVLPNR pc2  
Q9BYE9**

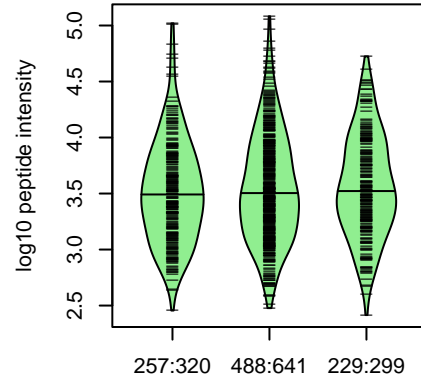

5:175945908:C:G\_C  
 $p = 0.1$ ,  $\beta = 0.0736$ ,  $N = 974$

**VTISVSDPYIQVQR pc2  
Q9BYE9**

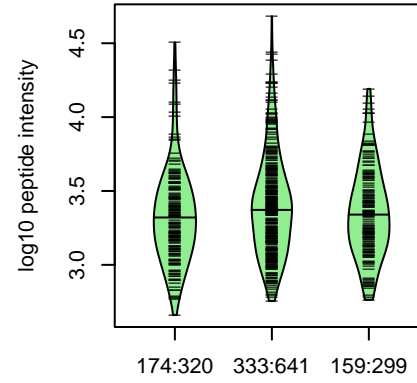

5:175945908:C:G\_C  
 $p = 0.1$ ,  $\beta = 0.0889$ ,  $N = 666$

**VSALVDYER pc2  
Q9BYE9**

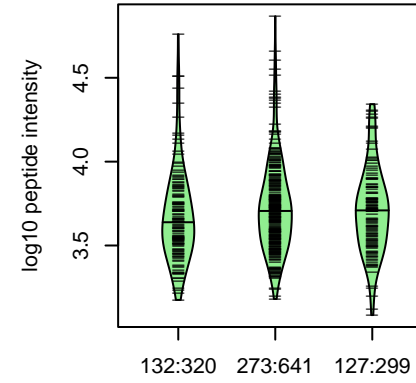

5:175945908:C:G\_C  
 $p = 0.099$ ,  $\beta = 0.102$ ,  $N = 532$

**GLVLGAGWAEGYLR pc2  
Q9BYE9**

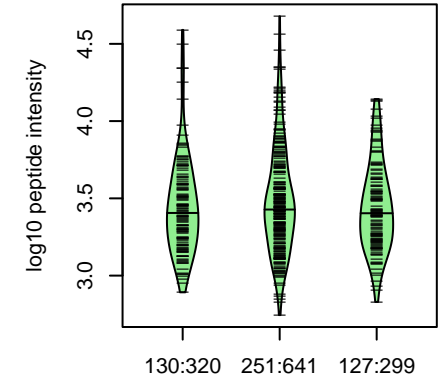

5:175945908:C:G\_C  
 $p = 0.83$ ,  $\beta = 0.0133$ ,  $N = 508$

**CDHR2 : NP2  
Q9BYE9**

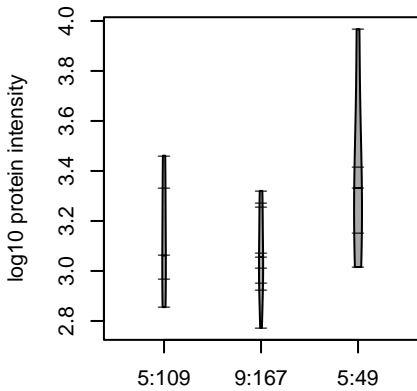

5:175945908:C:G\_G  
 $p = 0.13$ ,  $\beta = 0.432$ ,  $N = 19$

Assay Target: CDHR2  
 Olink UniProt: Q9BYE9  
 UKB rsID: rs2913909  
 Proxy rsID: rs2913909  
 UKB SNP: 5:175945908:C:G  
 Proxy SNP: 5:175945908:C:G  
 UKB log10(p): 81.7  
 UKB BETA: -0.1  
 -----  
 974:666:532:508:487:415:408:3

**GSR : NP1  
P00390**

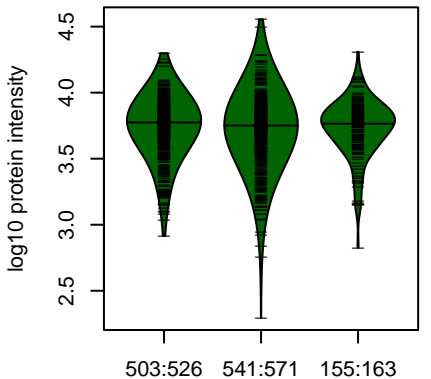

8:30556611:T:C\_C  
p = 0.34, beta = -0.0404, N = 1199

**GIYAVGDVCGK pc2  
P00390-3;P00390-4;P00390-5;P00390-6**

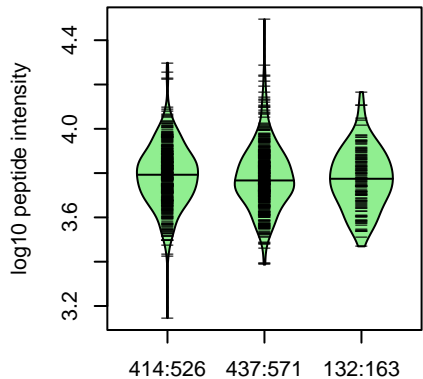

8:30556611:T:C\_C  
p = 0.13, beta = -0.0689, N = 983

**LGGTCVNVGCVPK pc2  
P00390-3;P00390-4;P00390-5;P00390-6**

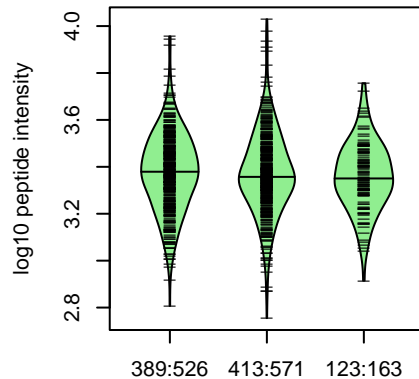

8:30556611:T:C\_C  
p = 0.26, beta = -0.0539, N = 925

**.DYNNIPTVVFSSHPIGTVGLTEDEAIHK  
P00390-3;P00390-4;P00390-5;P00390-6**

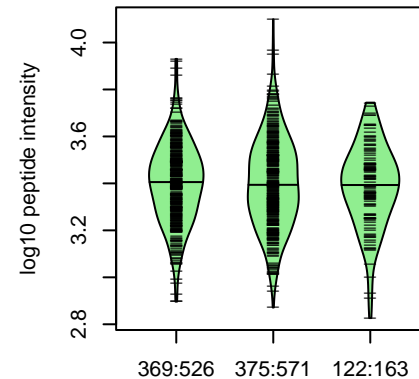

8:30556611:T:C\_C  
p = 0.72, beta = -0.0175, N = 866

**LNAIYQNNLTK pc2  
P00390-3;P00390-4;P00390-5;P00390-6**

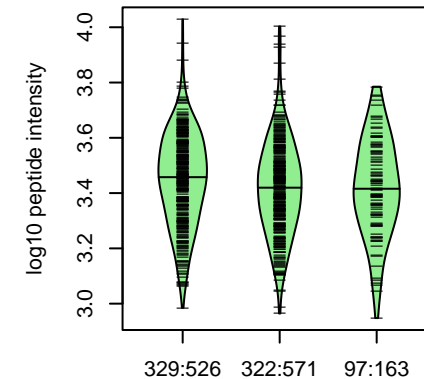

8:30556611:T:C\_C  
p = 0.048, beta = -0.104, N = 748

**GSR : NP1  
P00390;P00390-3**

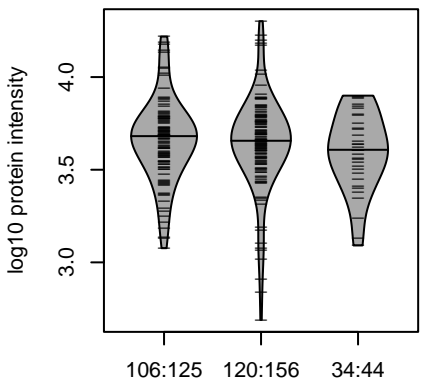

8:30556611:T:C\_C  
p = 0.48, beta = -0.0636, N = 260

**GIYAVGDVCGK pc2  
P00390-3;P00390-4;P00390-5;P00390-6**

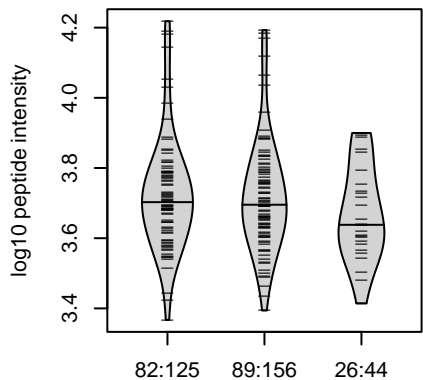

8:30556611:T:C\_C  
p = 0.49, beta = -0.071, N = 197

**ALLTPVAIAAGR pc2  
P00390-3;P00390-4;P00390-5;P00390-6**

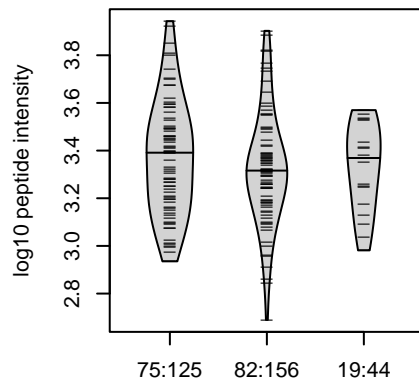

8:30556611:T:C\_C  
p = 0.67, beta = -0.0474, N = 176

**LGGTCVNVGCVPK pc2  
P00390-3;P00390-4;P00390-5;P00390-6**

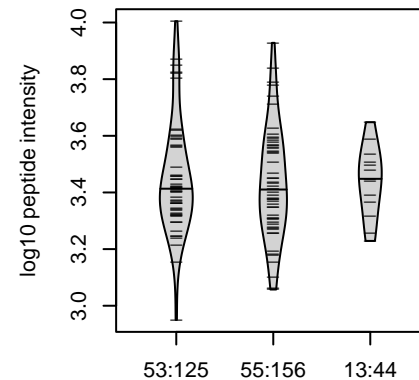

8:30556611:T:C\_C  
p = 0.97, beta = -0.00469, N = 121

**LNAIYQNNLTK pc2  
P00390-3;P00390-4;P00390-5;P00390-6**

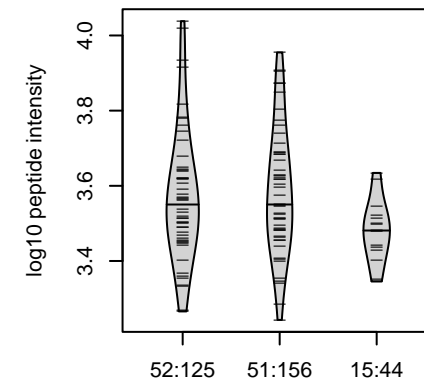

8:30556611:T:C\_C  
p = 0.57, beta = -0.0746, N = 118

Assay Target: GSR  
Olink UniProt: P00390  
UKB rsID: rs8190982  
Proxy rsID: rs2551710  
UKB SNP: 8:30556381:T:TCC  
Proxy SNP: 8:30556611:T:C  
UKB log10(p): 81.7  
UKB BETA: -0.126  
-----  
983:925:866:748:719:470:368:3

**CCN1 : NP4**  
**O00622**

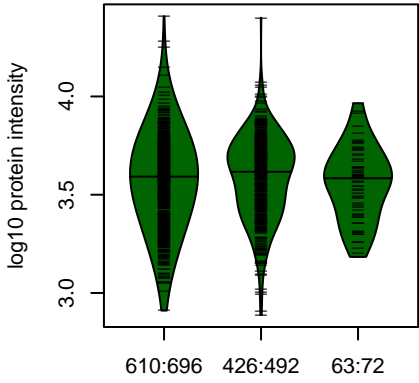

1:86063089:G:A\_A  
 $p = 0.48$ ,  $\beta = 0.0353$ ,  $N = 1099$

**ILYNPLQGQK pc2**  
**O00622**

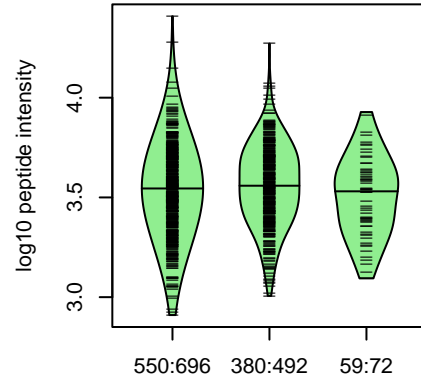

1:86063089:G:A\_A  
 $p = 0.46$ ,  $\beta = 0.0388$ ,  $N = 989$

**FTYAGCLSVK pc2**  
**O00622**

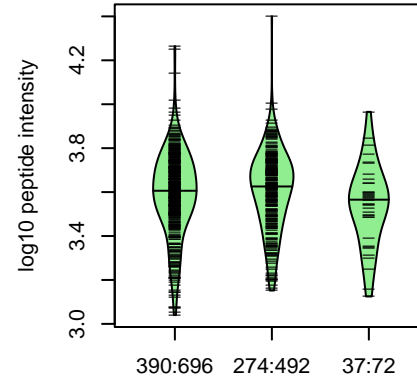

1:86063089:G:A\_A  
 $p = 0.72$ ,  $\beta = -0.0229$ ,  $N = 701$

**CCTPQLTR pc2**  
**O00622**

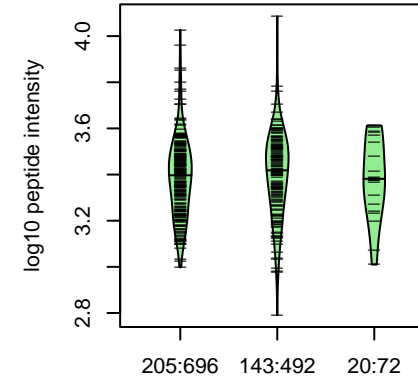

1:86063089:G:A\_A  
 $p = 0.61$ ,  $\beta = 0.0439$ ,  $N = 368$

**YCGSCVDGR pc2**  
**O00622**

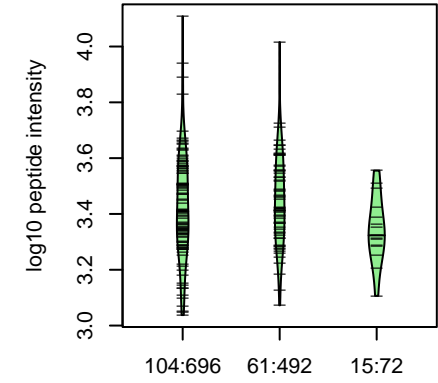

1:86063089:G:A\_A  
 $p = 0.69$ ,  $\beta = -0.045$ ,  $N = 180$

**CCN1 : NP4**  
**O00622**

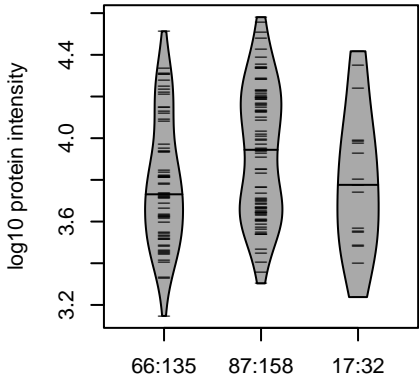

1:86063089:G:A\_A  
 $p = 0.099$ ,  $\beta = 0.194$ ,  $N = 170$

**ILYNPLQGQK pc2**  
**O00622**

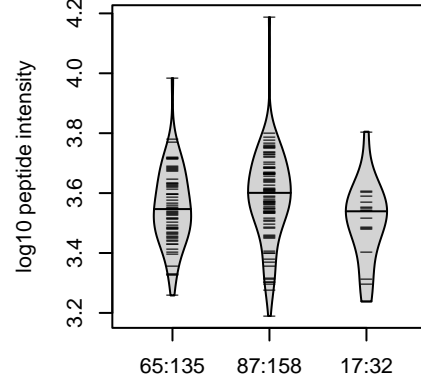

1:86063089:G:A\_A  
 $p = 0.63$ ,  $\beta = 0.0576$ ,  $N = 169$

Assay Target: CCN1  
Olink UniProt: O00622  
UKB rsID: rs4949912  
Proxy rsID: rs4949912  
UKB SNP: 1:86063089:G:A  
Proxy SNP: 1:86063089:G:A  
UKB log10(p): 81  
UKB BETA: -0.13  
-----  
989:701:368:180:121:75



**LCAT : NP2  
P04180**

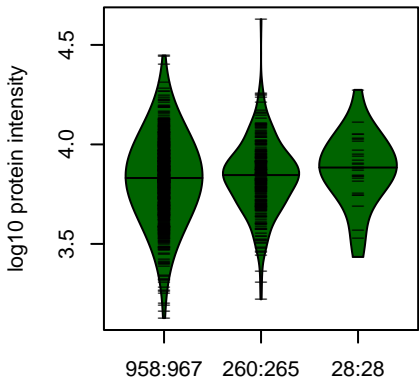

16:67954398:G:C\_C  
p = 0.19, beta = 0.076, N = 1246

**SSGLVSNAPGVQIR pc2  
P04180**

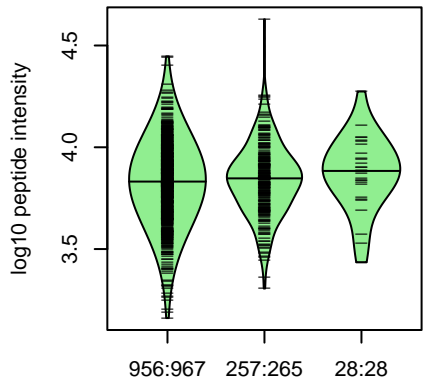

16:67954398:G:C\_C  
p = 0.15, beta = 0.0836, N = 1241

**STELCGLWQGR pc2  
P04180**

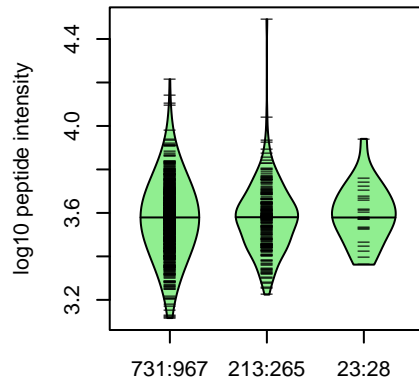

16:67954398:G:C\_C  
p = 0.84, beta = 0.0128, N = 967

**ITTTSPWMFPSR pc2  
P04180**

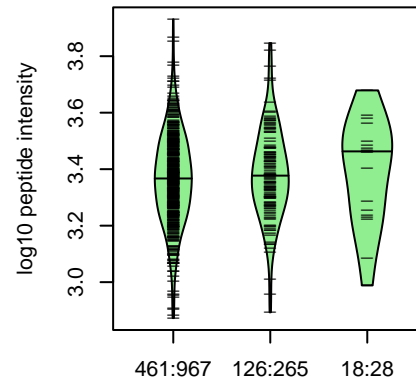

16:67954398:G:C\_C  
p = 0.3, beta = 0.0833, N = 605

**LDKPDVVNWMCYR pc3  
P04180**

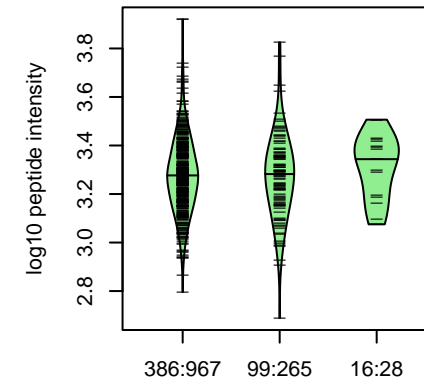

16:67954398:G:C\_C  
p = 0.94, beta = -0.00654, N = 501

**LCAT : NP2  
P04180**

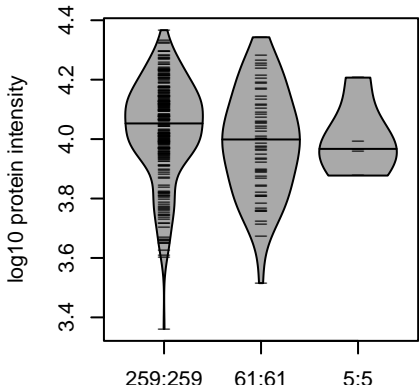

16:67954398:G:C\_C  
p = 0.35, beta = -0.115, N = 325

**SSGLVSNAPGVQIR pc2  
P04180**

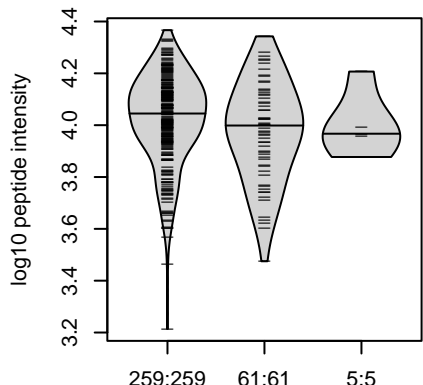

16:67954398:G:C\_C  
p = 0.42, beta = -0.0984, N = 325

**TYSVEYLDSSK pc2  
P04180**

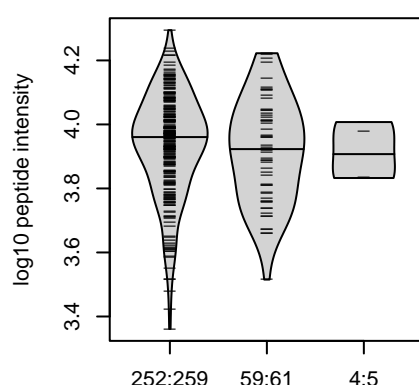

16:67954398:G:C\_C  
p = 0.97, beta = 0.004, N = 315

**ITTTSPWMFPSR pc2  
P04180**

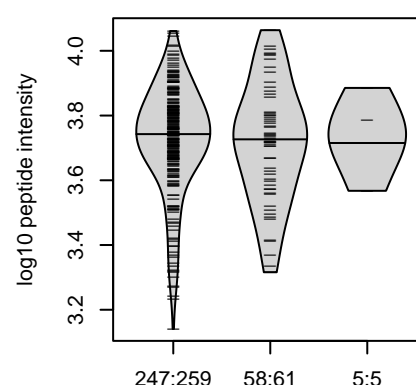

16:67954398:G:C\_C  
p = 0.62, beta = 0.0615, N = 310

**STELCGLWQGR pc2  
P04180**

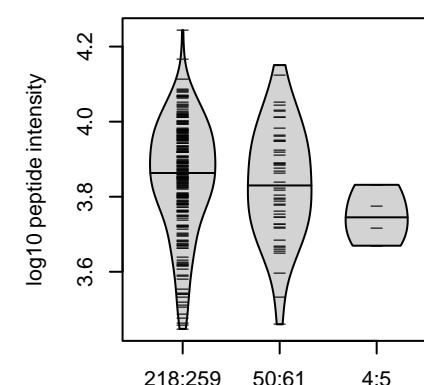

16:67954398:G:C\_C  
p = 0.61, beta = -0.0684, N = 272

Assay Target: LCAT  
Olink UniProt: P04180  
UKB rsID: rs112434994  
Proxy rsID: rs112434994  
UKB SNP: 16:67954398:G:C  
Proxy SNP: 16:67954398:G:C  
UKB log10(p): 79  
UKB BETA: 0.175  
-----  
1241:967:605:501:354:298



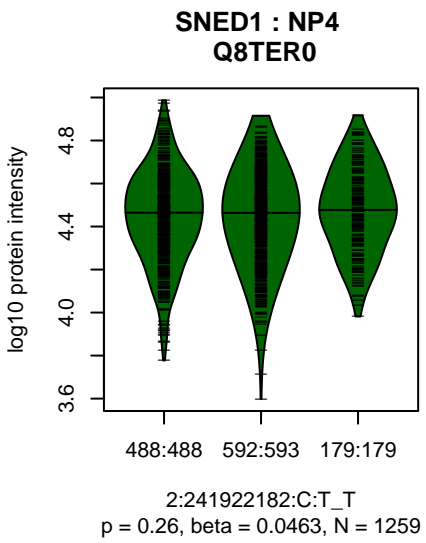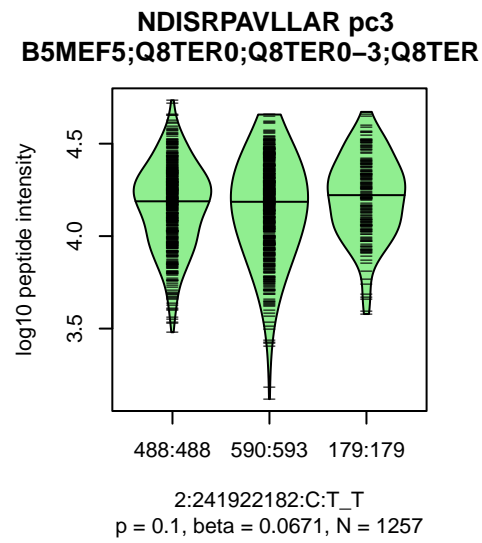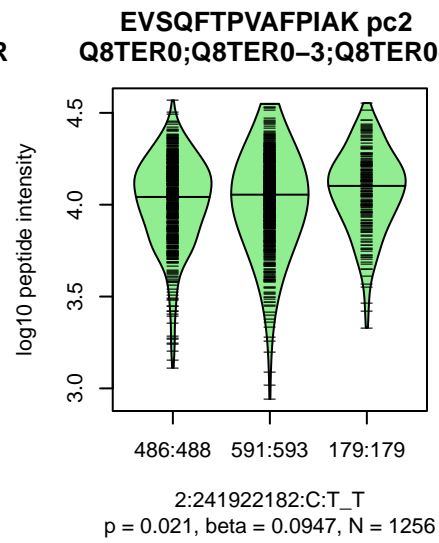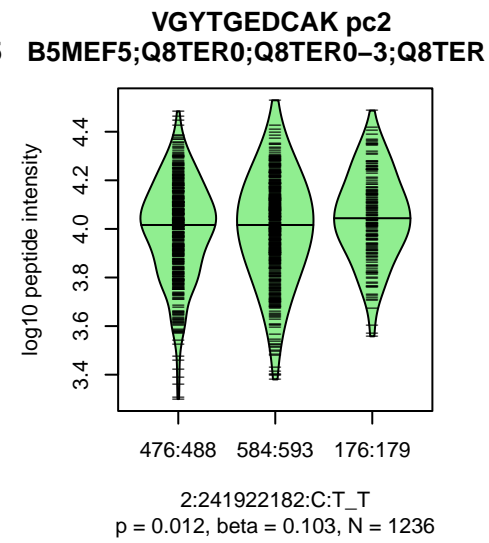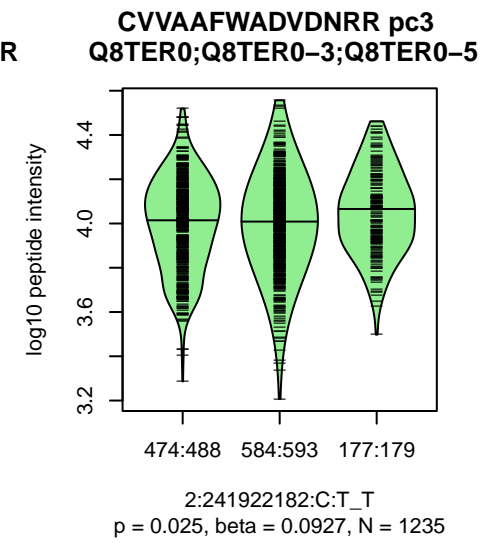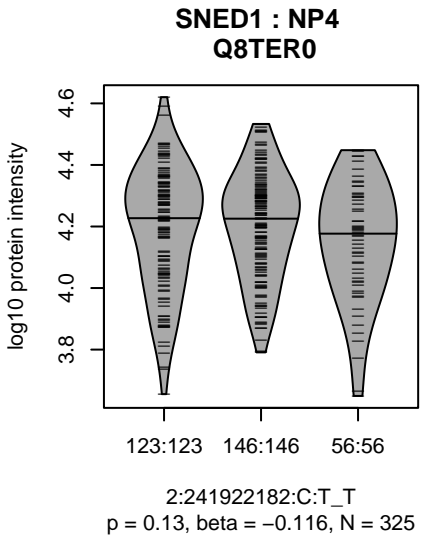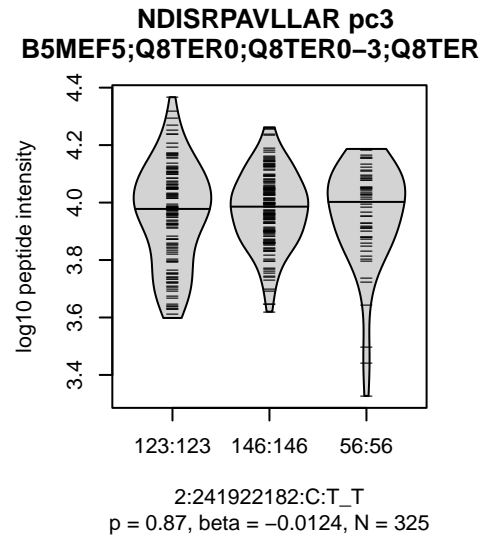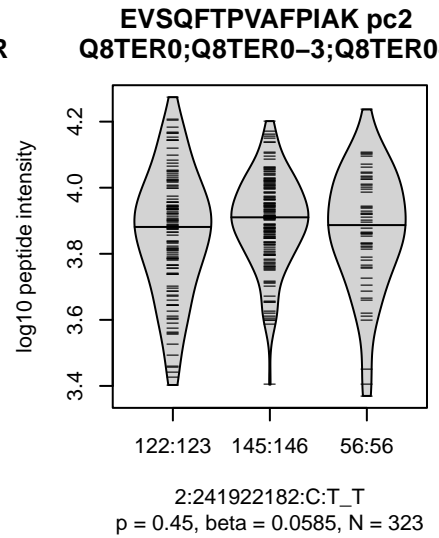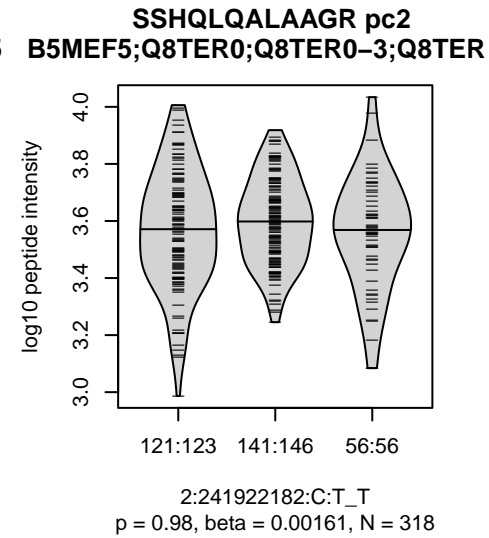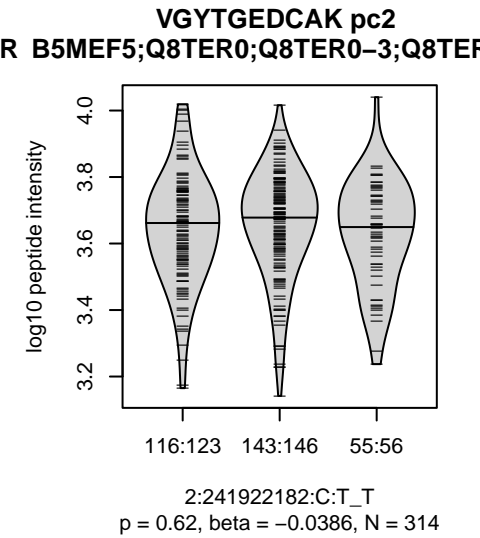

Assay Target: SNED1  
Olink UniProt: Q8TER0  
UKB rsID: rs4234090  
Proxy rsID: rs4234090  
UKB SNP: 2:241922182:C:T  
Proxy SNP: 2:241922182:C:T  
UKB log10(p): 73.4  
UKB BETA: 0.116  
-----  
1257:1256:1236:1235:1220:119

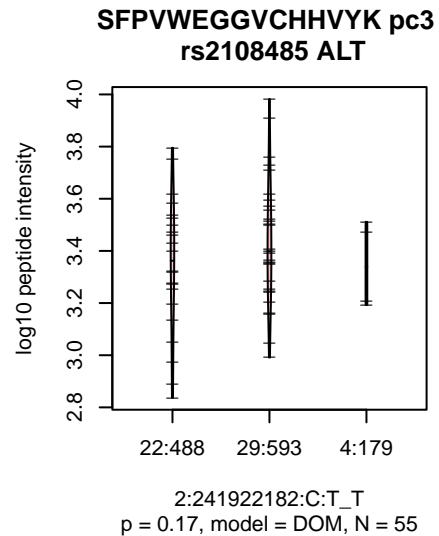



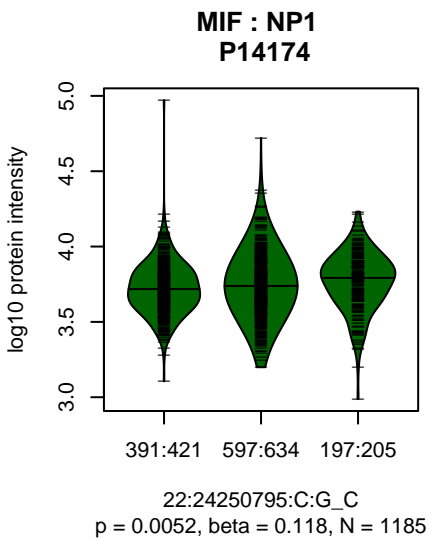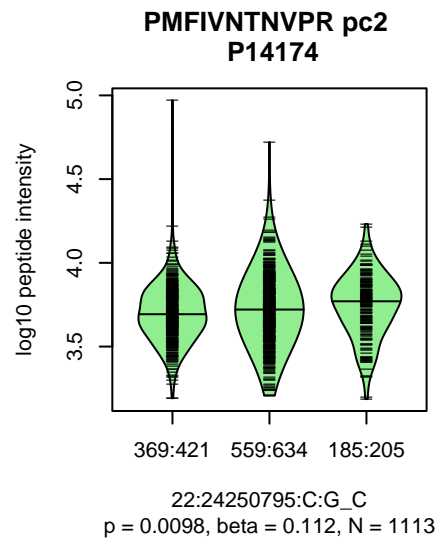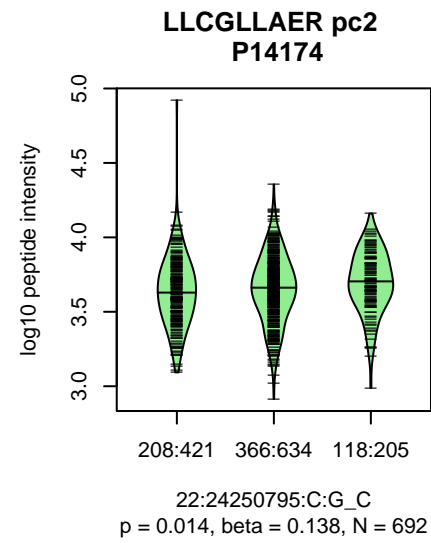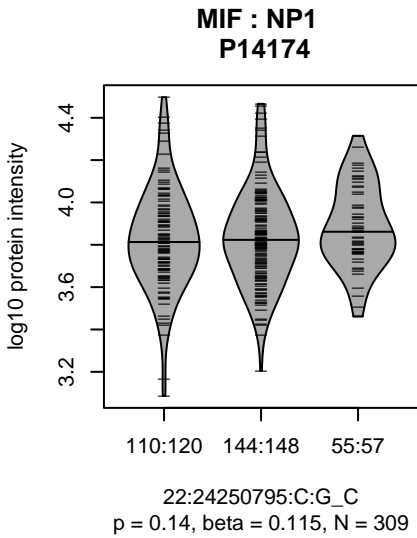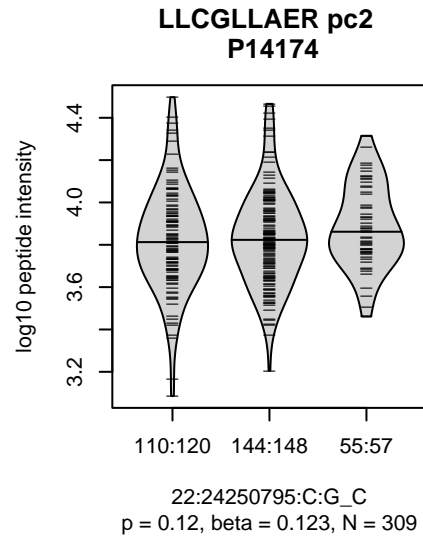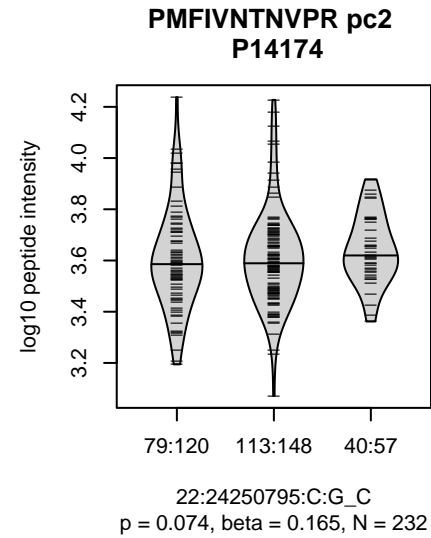

Assay Target: MIF  
 Olink UniProt: P14174  
 UKB rsID: rs2330634  
 Proxy rsID: rs2330634  
 UKB SNP: 22:24250795:C:G  
 Proxy SNP: 22:24250795:C:G  
 UKB log<sub>10</sub>(p): 71.1  
 UKB BETA: -0.112  
 \*.-  
 1113:692





**CSPG4 : NP2  
Q6UVK1**

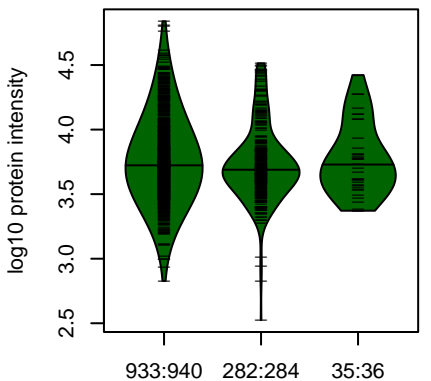

15:75969335:C:T\_T  
p = 0.21, beta = -0.0699, N = 1250

**VSDGLQASPPATLK pc2  
Q6UVK1**

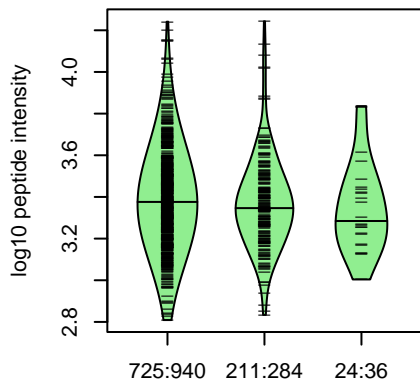

15:75969335:C:T\_T  
p = 0.18, beta = -0.0866, N = 960

**VTGALQFGELQK pc2  
Q6UVK1**

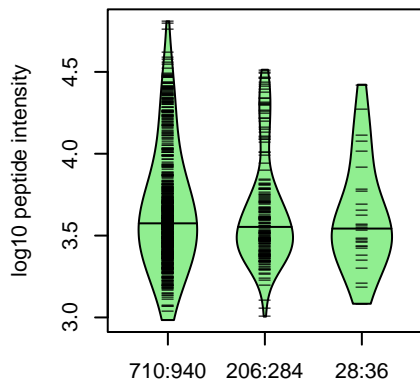

15:75969335:C:T\_T  
p = 0.41, beta = -0.0526, N = 944

**ASSSAGTDPQLLLYR pc2  
Q6UVK1**

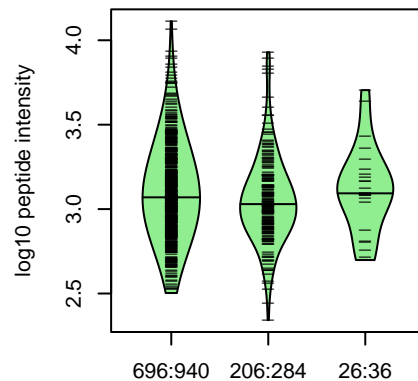

15:75969335:C:T\_T  
p = 0.13, beta = -0.098, N = 928

**IYVFQGEAAEIR pc2  
Q6UVK1**

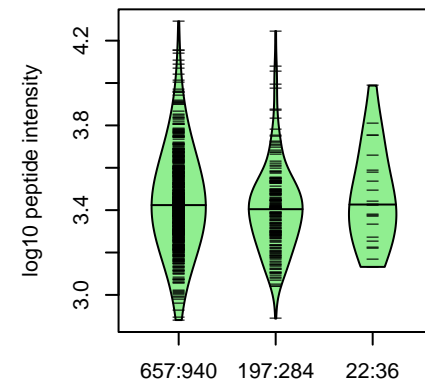

15:75969335:C:T\_T  
p = 0.17, beta = -0.0915, N = 876

**CSPG4 : NP2  
Q6UVK1**

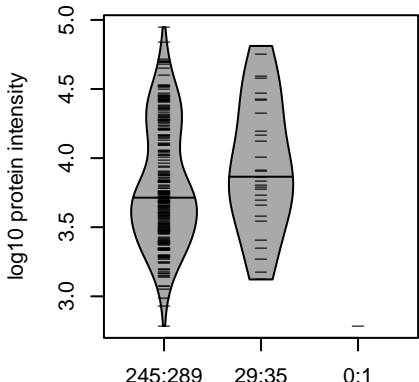

15:75969335:C:T\_T  
p = 0.042, beta = 0.393, N = 274

**HGELELDIPGAQAR pc3  
Q6UVK1**

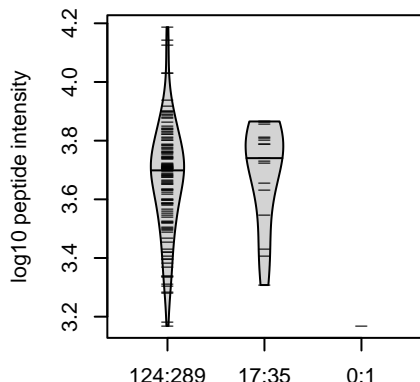

15:75969335:C:T\_T  
p = 0.66, beta = 0.11, N = 141

**APLEVPQALGR pc2  
Q6UVK1**

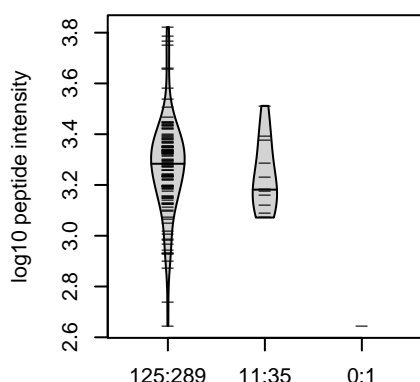

15:75969335:C:T\_T  
p = 0.45, beta = -0.231, N = 136

**DLLFGSIVAVDEPTRPIYR pc3  
Q6UVK1**

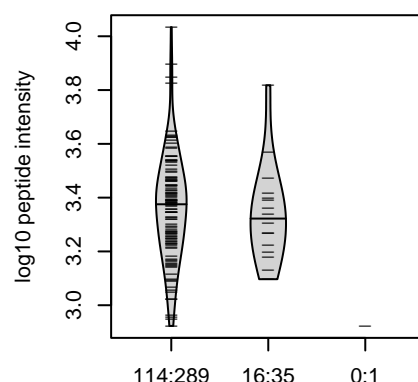

15:75969335:C:T\_T  
p = 0.31, beta = -0.265, N = 130

**VAIQPVNDHAPVQTISR pc3  
Q6UVK1**

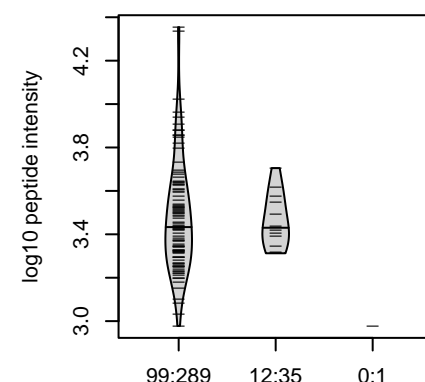

15:75969335:C:T\_T  
p = 0.47, beta = -0.217, N = 111

**DVAATLAVAVSFEAACPRPSHLWK f  
rs8023621 REF**

Assay Target: CSPG4  
Olink UniProt: Q6UVK1  
UKB rsID: rs77237106  
Proxy rsID: rs77237106  
UKB SNP: 15:75969335:C:T  
Proxy SNP: 15:75969335:C:T  
UKB log10(p): 68.6  
UKB BETA: -0.136  
-----  
960:944:928:876:875:867:789:7

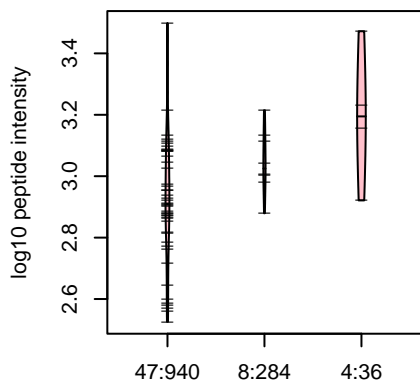

15:75969335:C:T\_T  
p = 0.083, model = DOM, N = 59



**RALB : NP4**  
**P11234**

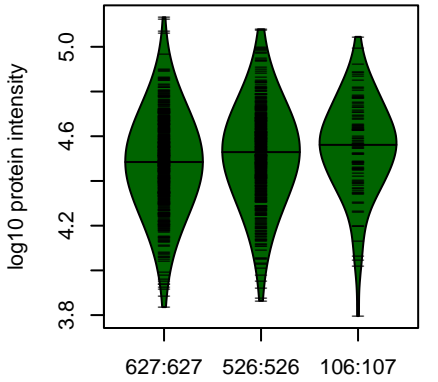

2:121034530:A:G\_A  
p = 7.5e-07, beta = 0.216, N = 1259

**IPLLVGNGK pc2**  
**P11234**

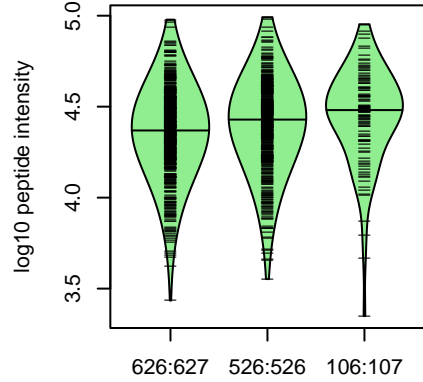

2:121034530:A:G\_A  
p = 2.1e-07, beta = 0.226, N = 1258

**VFFDLMR pc2**  
**P11233;P11234**

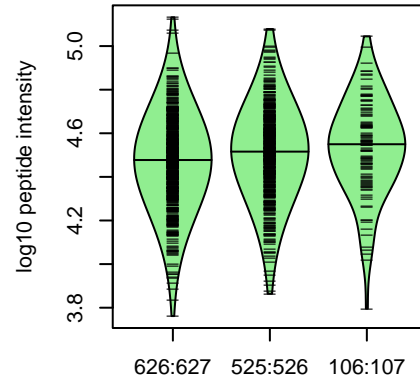

2:121034530:A:G\_A  
p = 6.5e-06, beta = 0.197, N = 1257

**AEWGVQYVETSAK pc2**  
**P11234**

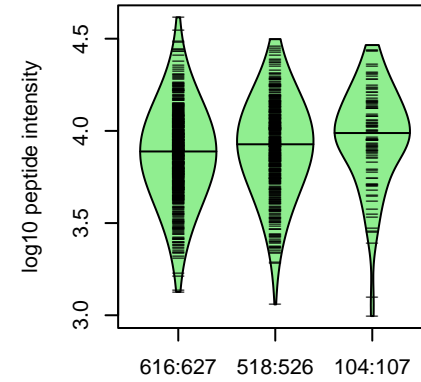

2:121034530:A:G\_A  
p = 5.9e-07, beta = 0.22, N = 1238

**QVPVEEAR pc2**  
**P11234**

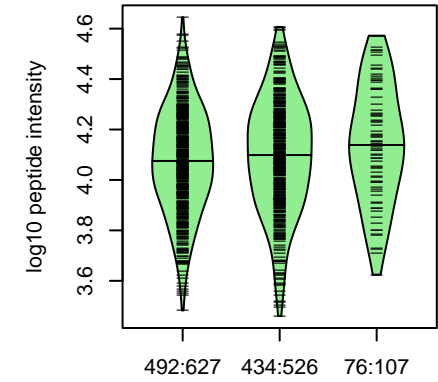

2:121034530:A:G\_A  
p = 0.0048, beta = 0.141, N = 1002

**RALB : NP4**  
**P11234**

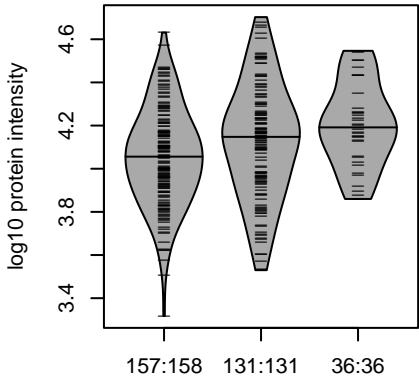

2:121034530:A:G\_A  
p = 0.0016, beta = 0.254, N = 324

**IPLLVGNGK pc2**  
**P11234**

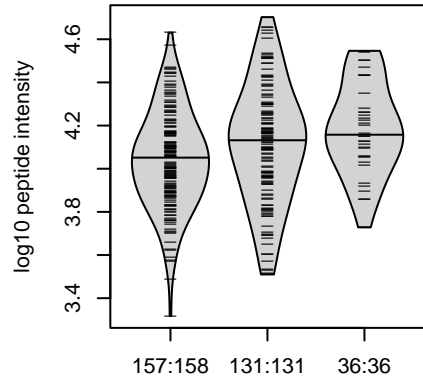

2:121034530:A:G\_A  
p = 0.0028, beta = 0.242, N = 324

**VFFDLMR pc2**  
**P11233;P11234**

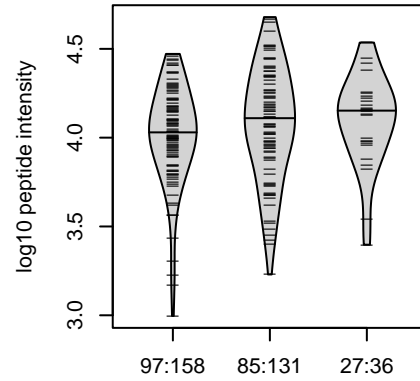

2:121034530:A:G\_A  
p = 0.28, beta = 0.105, N = 209

**VIMVSGGVGK pc2**  
**F8WEQ6;P11233;P11234**

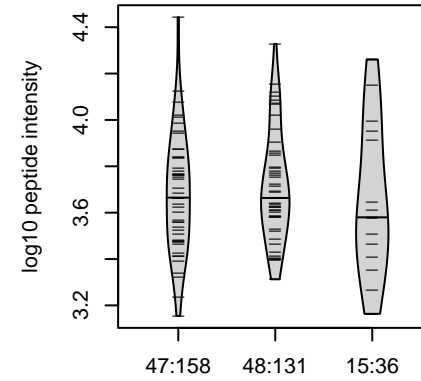

2:121034530:A:G\_A  
p = 0.75, beta = -0.0421, N = 110

**GQSSLALHK pc2**  
**F8WEQ6;P11234**

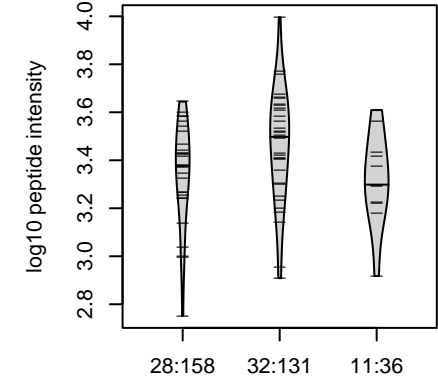

2:121034530:A:G\_A  
p = 0.83, beta = 0.036, N = 71

Assay Target: RALB  
Olink UniProt: P11234  
UKB rsID: rs148102406  
Proxy rsID: rs4849847  
UKB SNP: 2:121035039:T:TGTG  
Proxy SNP: 2:121034530:A:G  
UKB log10(p): 67.7  
UKB BETA: -0.119  
\*.\*.\*.\*.\*-.-.-.-.-  
1258:1257:1238:1002:831:464:1

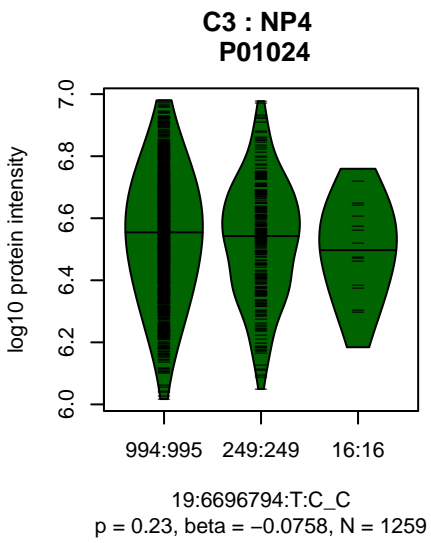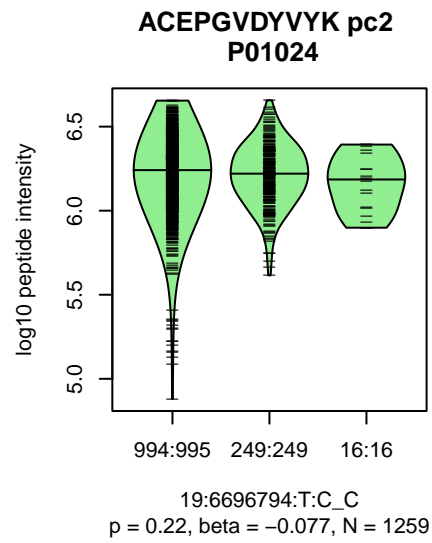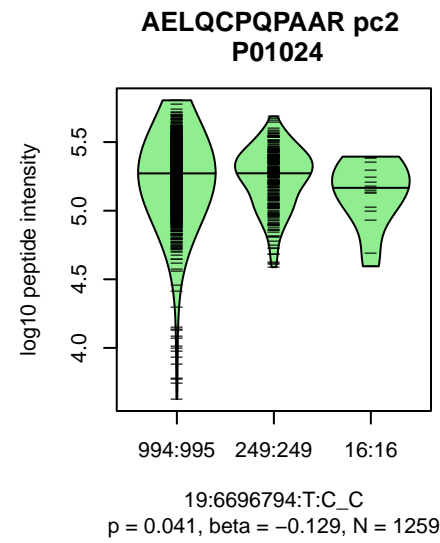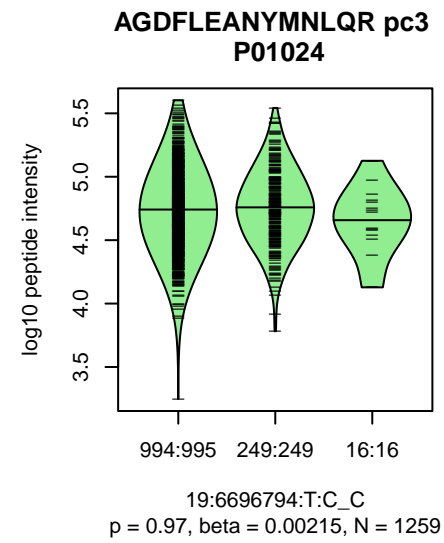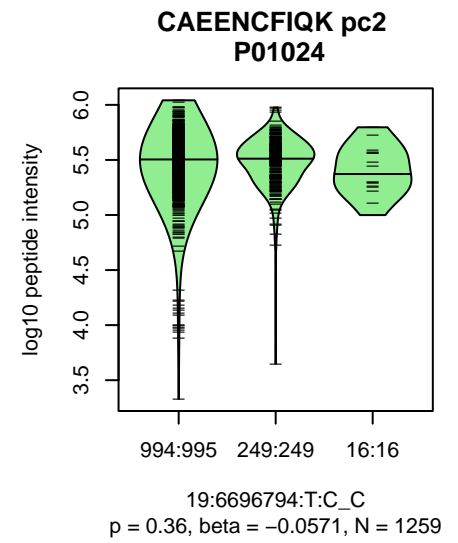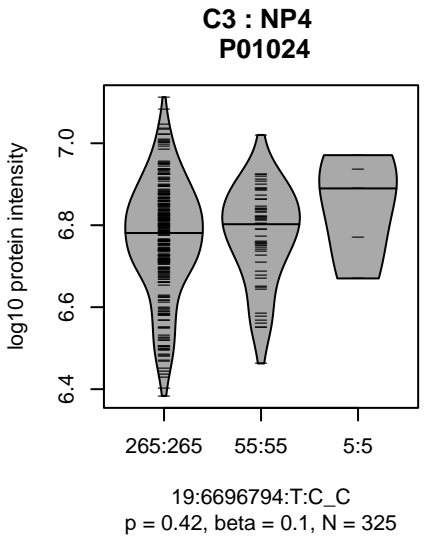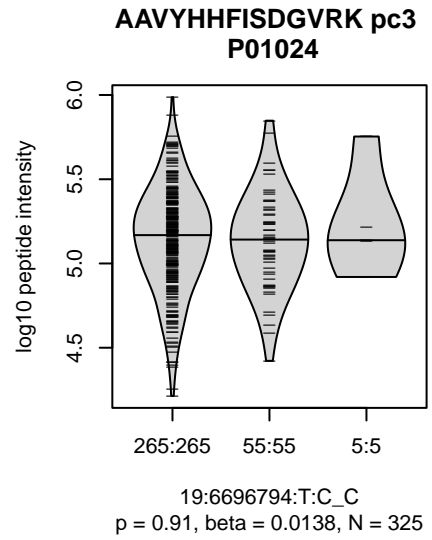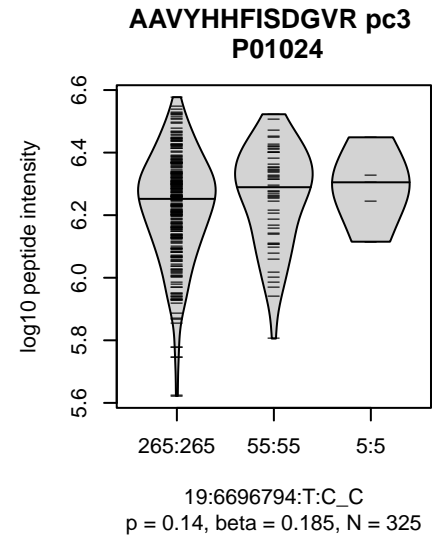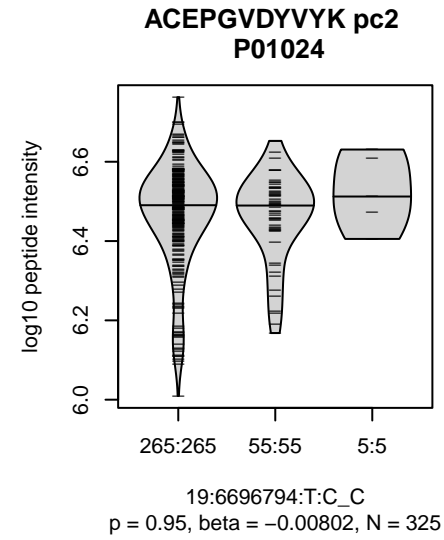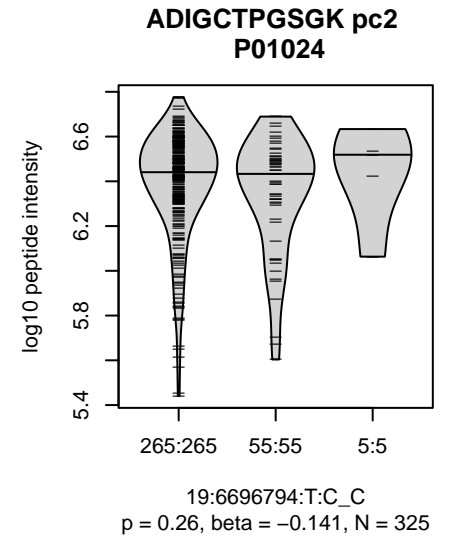

Assay Target: C3  
 Olink UniProt: P01024  
 UKB rsID: rs5826945  
 Proxy rsID: rs11569479  
 UKB SNP: 19:6697088:A:T  
 Proxy SNP: 19:6696794:T:C  
 UKB log10(p): 66.9  
 UKB BETA: -0.157  
 -----\*  
 1259:1259:1259:1259:1259:125

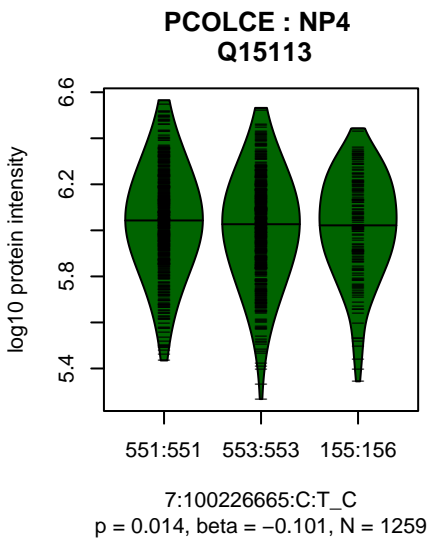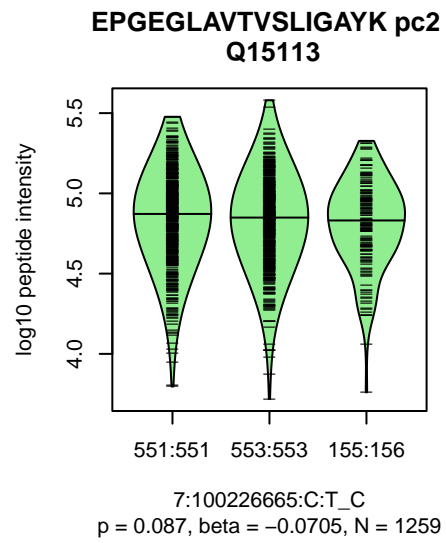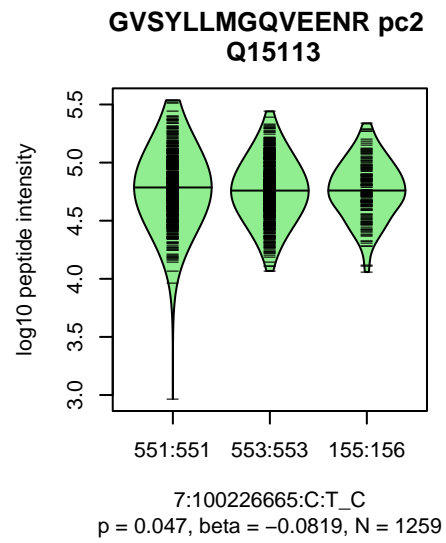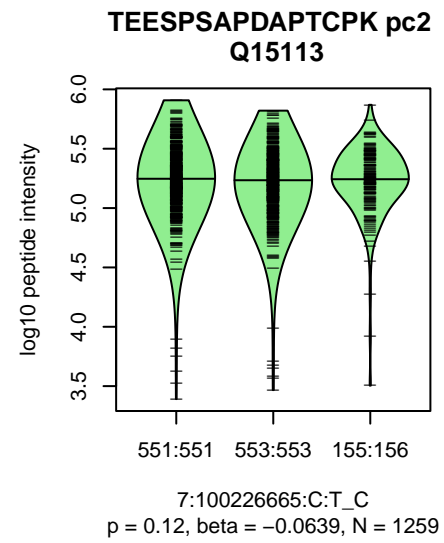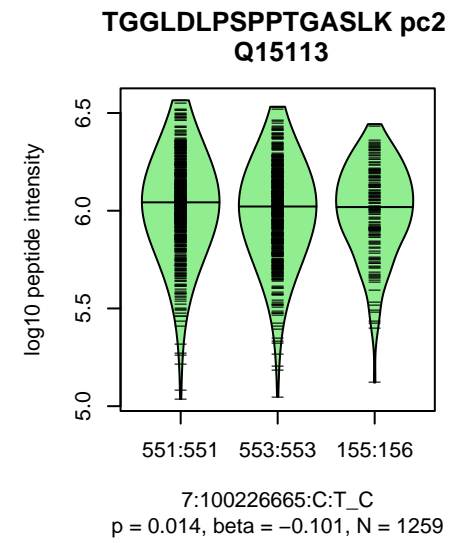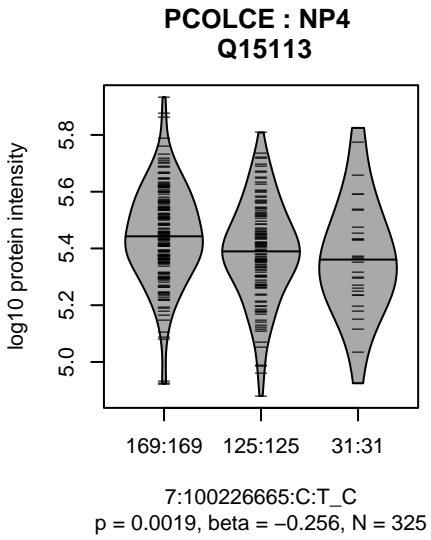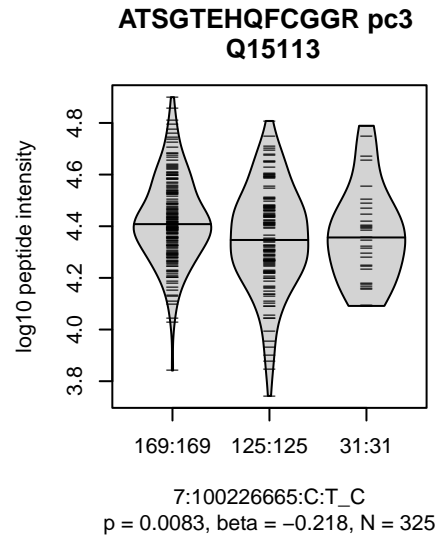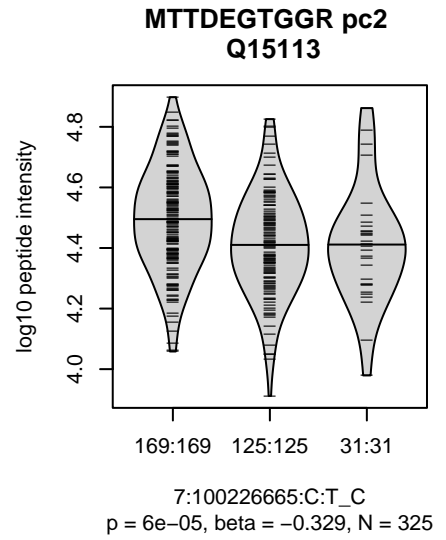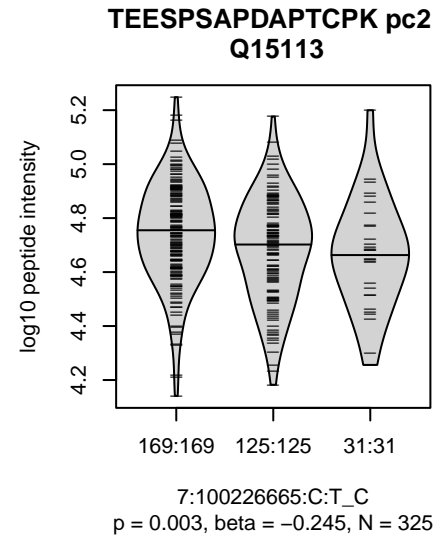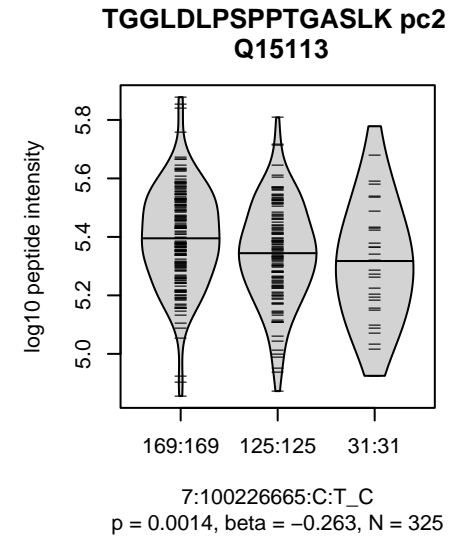

Assay Target: PCOLCE  
 Olink UniProt: Q15113  
 UKB rsID: rs4548095  
 Proxy rsID: rs4548095  
 UKB SNP: 7:100226665:C:T  
 Proxy SNP: 7:100226665:C:T  
 UKB log10(p): 63.7  
 UKB BETA: 0.169  
 -----\*-----  
 1259:1259:1259:1259:1259:125

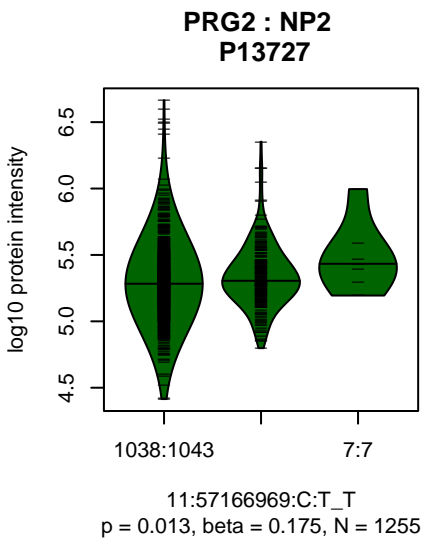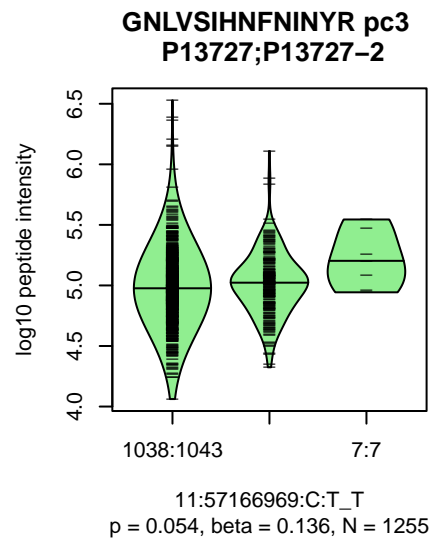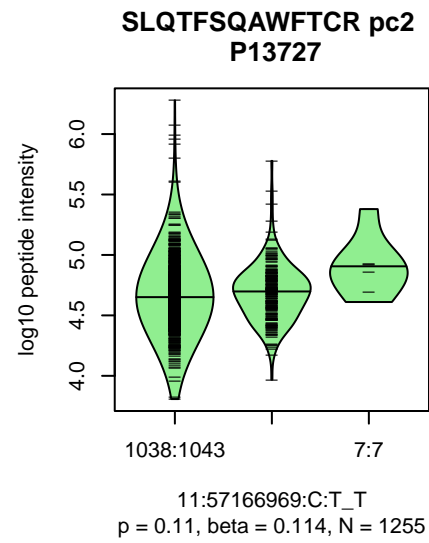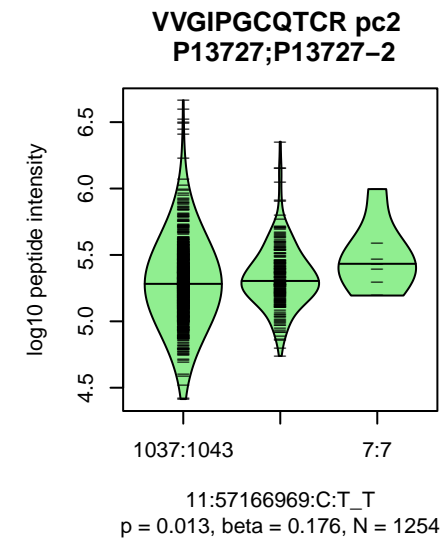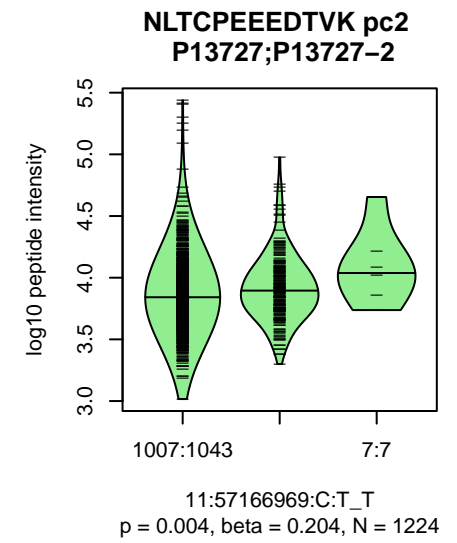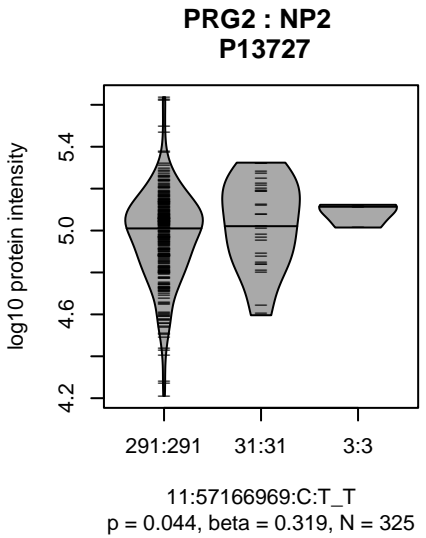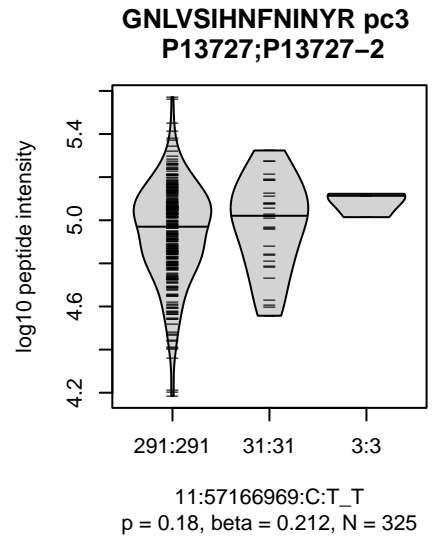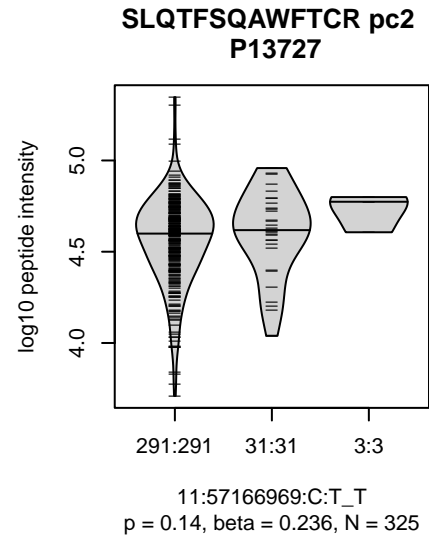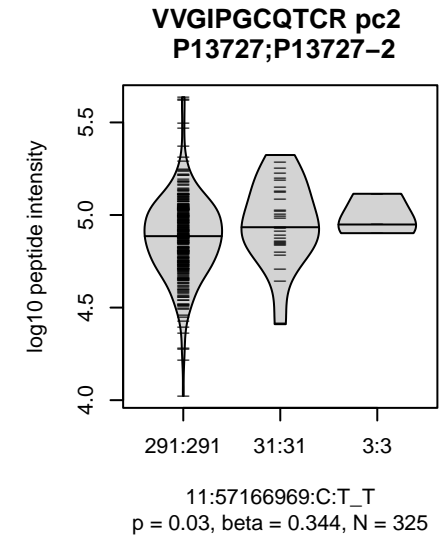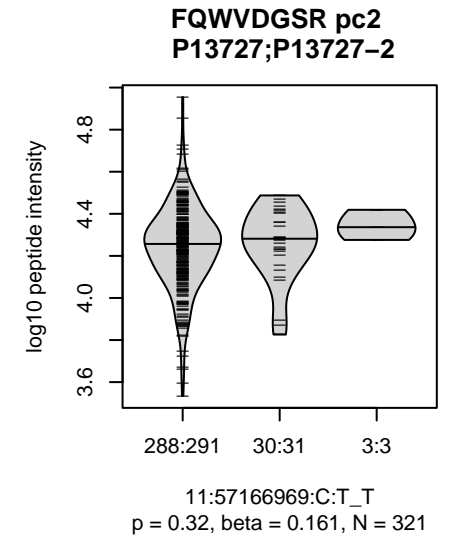

Assay Target: PRG2  
 Olink UniProt: P13727  
 UKB rsID: rs3741085  
 Proxy rsID: rs3741085  
 UKB SNP: 11:57166969:C:T  
 Proxy SNP: 11:57166969:C:T  
 UKB log10(p): 62.4  
 UKB BETA: 0.15  
 - - - - -  
 1255:1255:1254:1224:1207:118

**PSME2 : NP1**  
**A0A087X1Z3;Q9UL46**

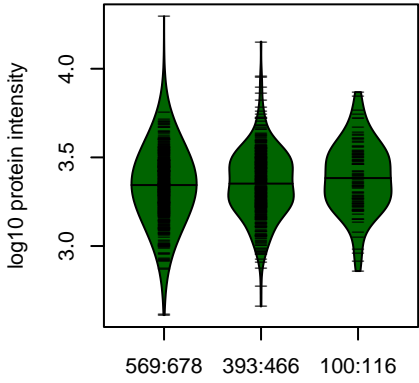

14:24610733:T:C\_C  
 $p = 0.082$ ,  $\beta = 0.0804$ ,  $N = 1062$

**VLSLLALVKPEVWTLK pc3**  
**A0A087X1Z3;H0YM70;Q9UL46**

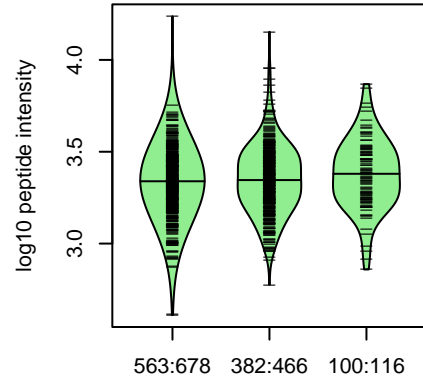

14:24610733:T:C\_C  
 $p = 0.088$ ,  $\beta = 0.0793$ ,  $N = 1045$

**ALVHERDEAAYGELR pc3**  
**A0A087X1Z3;H0YM70;Q9UL46**

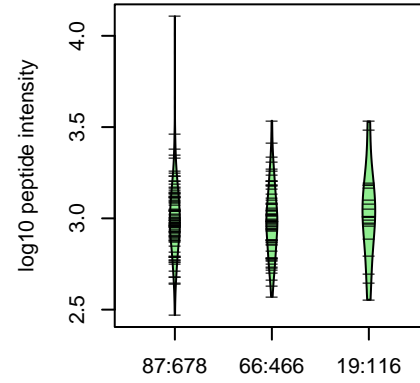

14:24610733:T:C\_C  
 $p = 0.66$ ,  $\beta = 0.0488$ ,  $N = 172$

**QNLFQEAEEFLYR pc2**  
**A0A087X1Z3;Q9UL46**

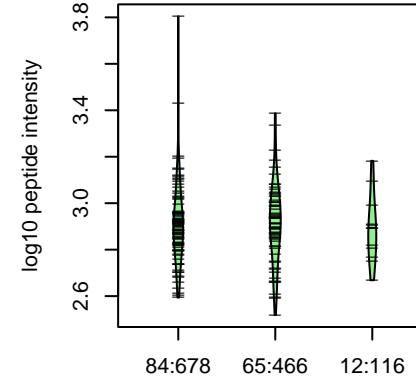

14:24610733:T:C\_C  
 $p = 0.96$ ,  $\beta = 0.00633$ ,  $N = 161$

**CGFLPGNEK pc2**  
**A0A087X1Z3;H0YM70;Q9UL46**

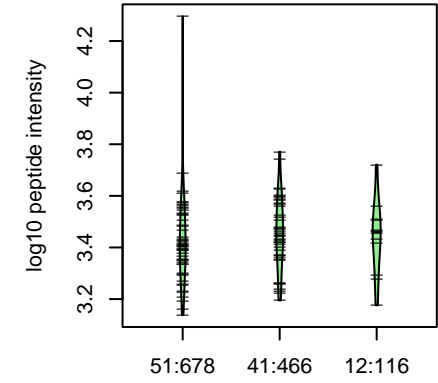

14:24610733:T:C\_C  
 $p = 0.44$ ,  $\beta = 0.108$ ,  $N = 104$

**PSME2 : NP1**  
**A0A087X1Z3;Q9UL46**

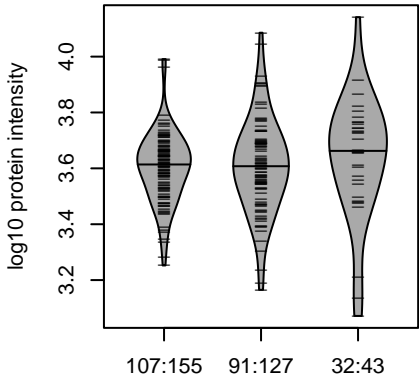

14:24610733:T:C\_C  
 $p = 0.42$ ,  $\beta = 0.0737$ ,  $N = 230$

**VLSLLALVKPEVWTLK pc3**  
**A0A087X1Z3;H0YM70;Q9UL46**

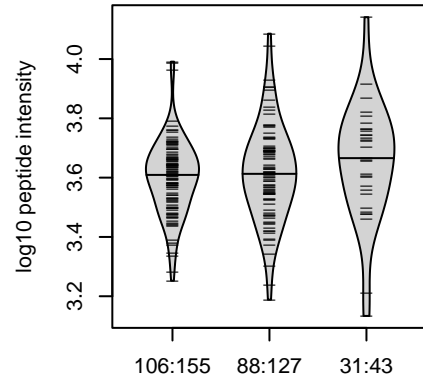

14:24610733:T:C\_C  
 $p = 0.32$ ,  $\beta = 0.0933$ ,  $N = 225$

**VEAFQTTISK pc2**  
**A0A087X1Z3;H0YM70;Q9UL46**

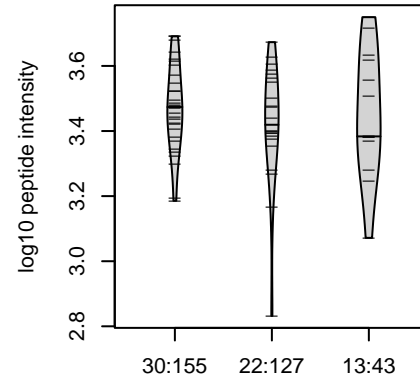

14:24610733:T:C\_C  
 $p = 0.98$ ,  $\beta = 0.00392$ ,  $N = 65$

**QNLFQEAEEFLYR pc2**  
**A0A087X1Z3;Q9UL46**

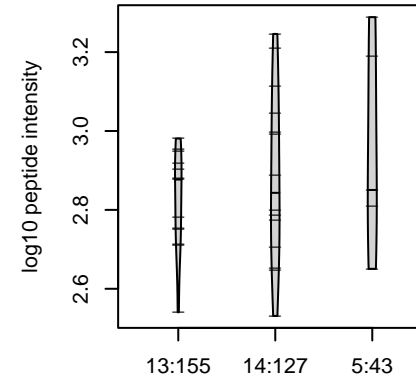

14:24610733:T:C\_C  
 $p = 0.41$ ,  $\beta = 0.194$ ,  $N = 32$

**CGFLPGNEK pc2**  
**A0A087X1Z3;H0YM70;Q9UL46**

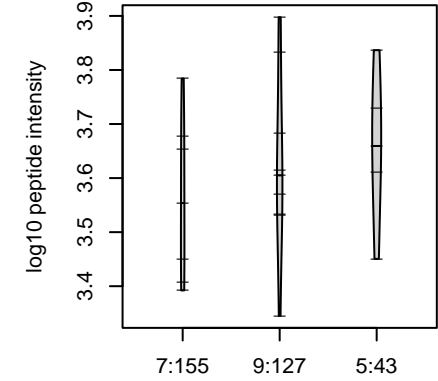

14:24610733:T:C\_C  
 $p = 0.8$ ,  $\beta = 0.067$ ,  $N = 21$

Assay Target: PSME2  
Olink UniProt: Q9UL46  
UKB rsID: rs2236352  
Proxy rsID: rs2236352  
UKB SNP: 14:24610733:T:C  
Proxy SNP: 14:24610733:T:C  
UKB log10(p): 58.8  
UKB BETA: 0.111  
-----  
1045:172:161:104:92:91:54:45:3

CA2 : NP3  
P00918

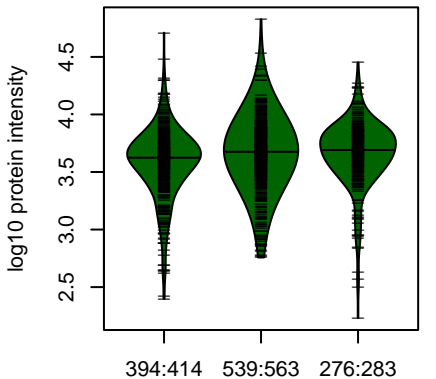

8:86860127:A:G\_G  
p = 0.00045, beta = 0.136, N = 1209

AVQQPDGLAVLGIFLK pc2  
P00918

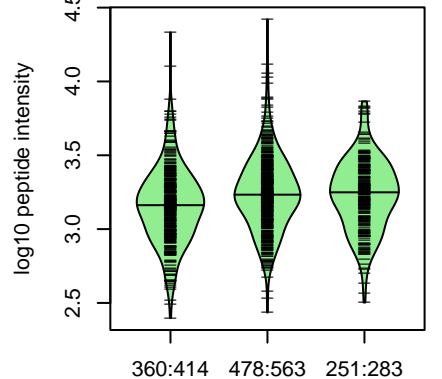

8:86860127:A:G\_G  
p = 0.00056, beta = 0.14, N = 1089

VVDVLDSIK pc2  
P00918

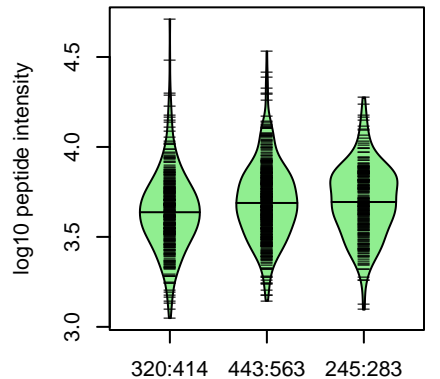

8:86860127:A:G\_G  
p = 0.0015, beta = 0.134, N = 1008

EPISVSSEQVLK pc2  
P00918

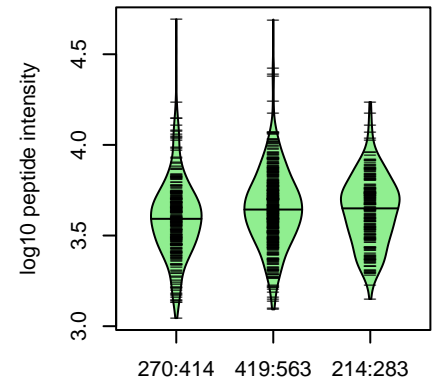

8:86860127:A:G\_G  
p = 0.018, beta = 0.108, N = 903

PLSVSYDQATSLR pc2  
E5RID5;E5RK37;P00918

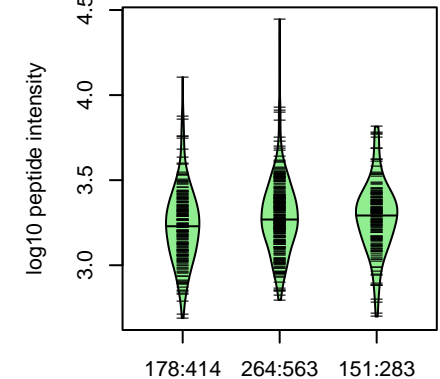

8:86860127:A:G\_G  
p = 0.0073, beta = 0.147, N = 593

CA2 : NP3  
P00918

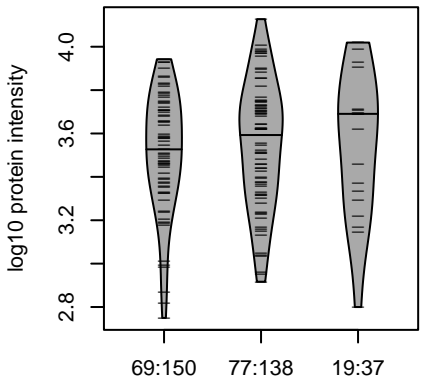

8:86860127:A:G\_G  
p = 0.39, beta = 0.0979, N = 165

EPISVSSEQVLK pc2  
P00918

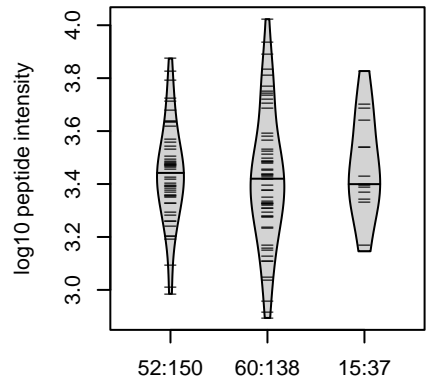

8:86860127:A:G\_G  
p = 0.51, beta = -0.0849, N = 127

VVDVLDSIK pc2  
P00918

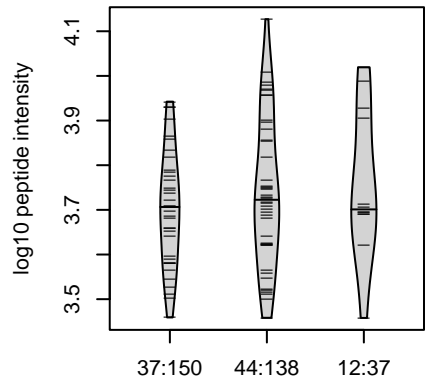

8:86860127:A:G\_G  
p = 0.44, beta = 0.116, N = 93

AVQQPDGLAVLGIFLK pc2  
P00918

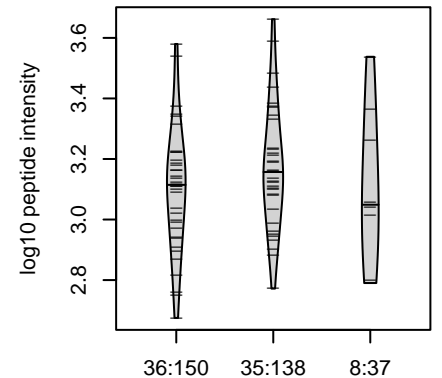

8:86860127:A:G\_G  
p = 0.66, beta = 0.0735, N = 79

GGPLDGTYSR pc2  
P00918

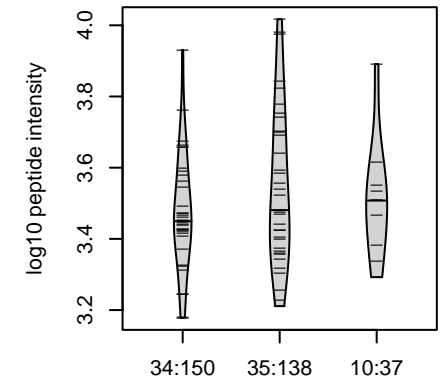

8:86860127:A:G\_G  
p = 0.29, beta = 0.167, N = 79

Assay Target: CA2  
Olink UniProt: P00918  
UKB rsID: rs2980370  
Proxy rsID: rs2980370  
UKB SNP: 8:86860127:A:G  
Proxy SNP: 8:86860127:A:G  
UKB log10(p): 58.8  
UKB BETA: 0.097  
\*:\*:-\*:-\*:-\*:-\*:-\*:-\*:-NA:NA  
1089:1008:903:593:574:513:440



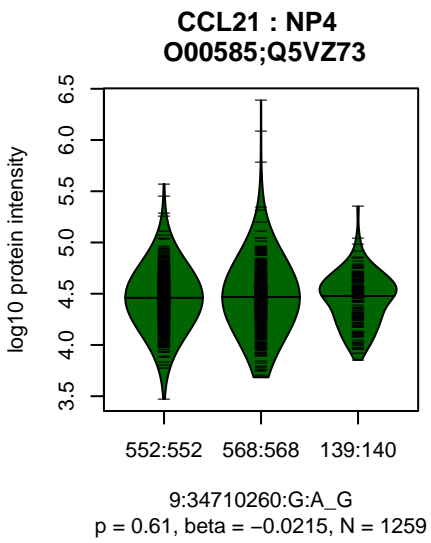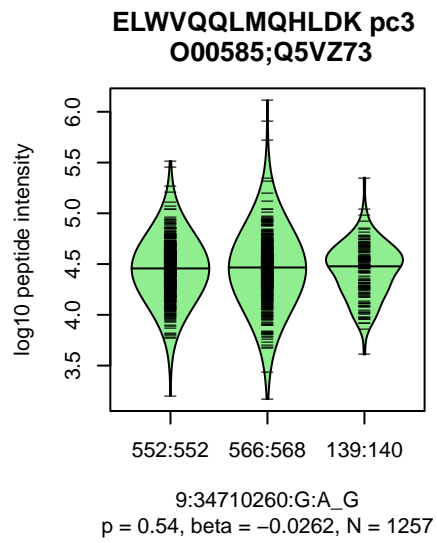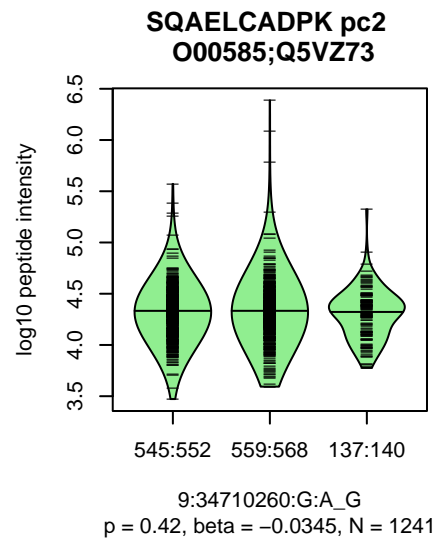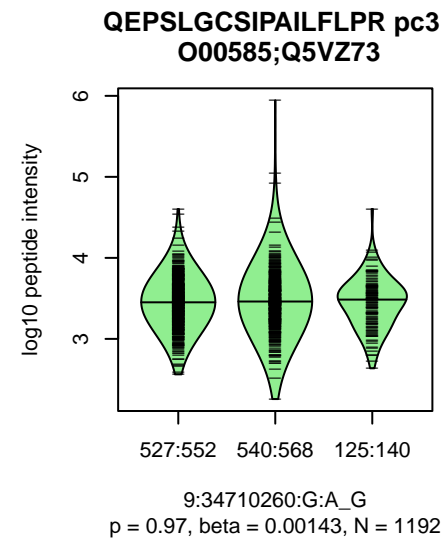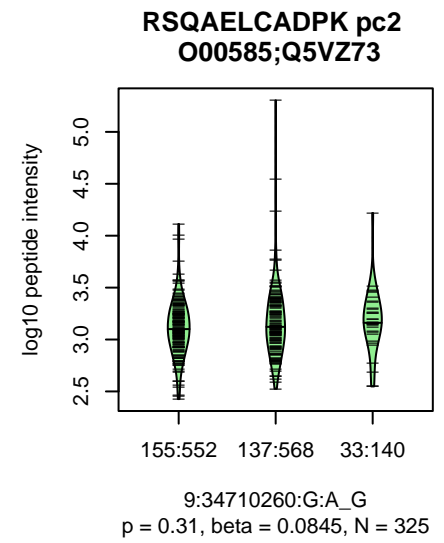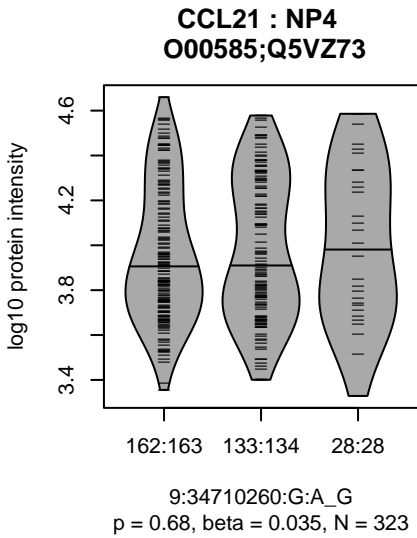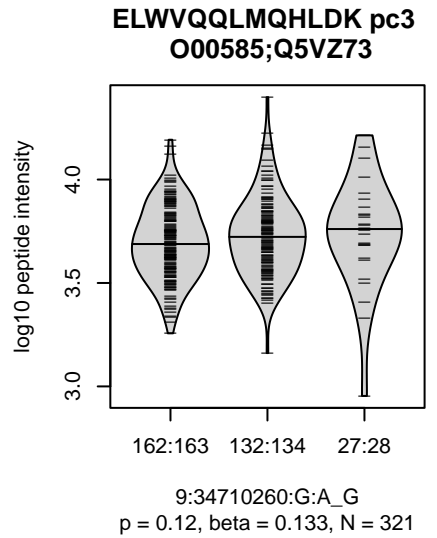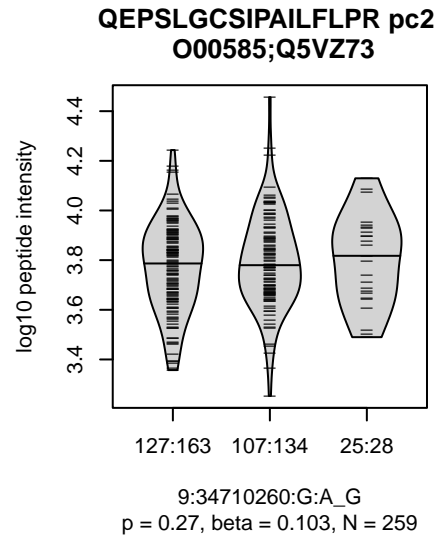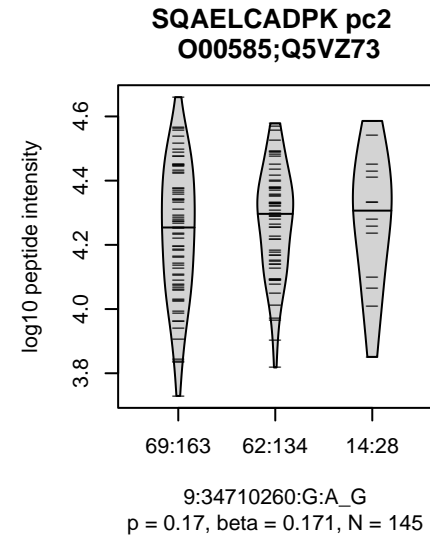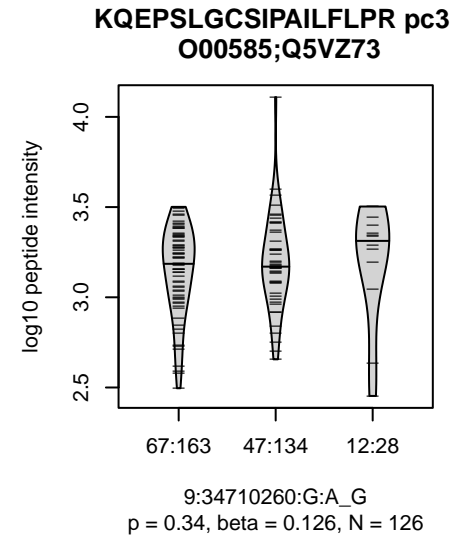

Assay Target: CCL21  
 Olink UniProt: O00585  
 UKB rsID: rs2812378  
 Proxy rsID: rs2812378  
 UKB SNP: 9:34710260:G:A  
 Proxy SNP: 9:34710260:G:A  
 UKB log10(p): 57.3  
 UKB BETA: 0.101  
 -:-:-:-:-:NA:NA  
 1257:1241:1208:1192:325:310:





**NBL1 : NP2**  
**A0A087WTY6;P41271-2**

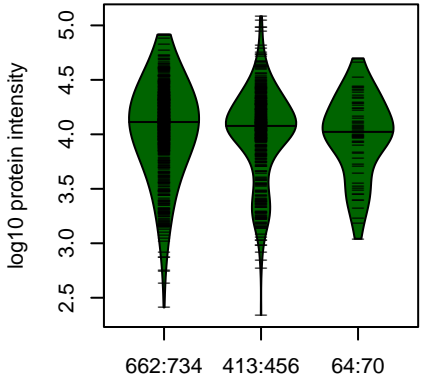

1:19968058:T:C\_C  
 $\rho = 0.093$ ,  $\beta = -0.0823$ ,  $N = 1139$

**ILHCSCQACGK pc3**  
**A0A087WTY6;P41271;P41271-2**

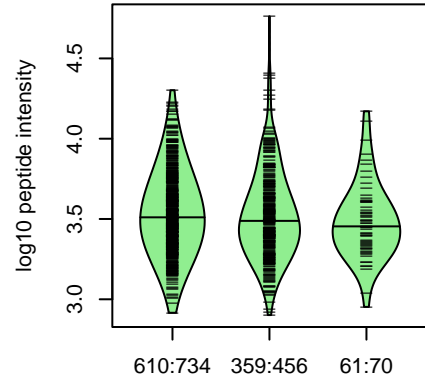

1:19968058:T:C\_C  
 $\rho = 0.23$ ,  $\beta = -0.0609$ ,  $N = 1030$

**SAWCEAK pc2**  
**A0A087WTY6;P41271;P41271-2**

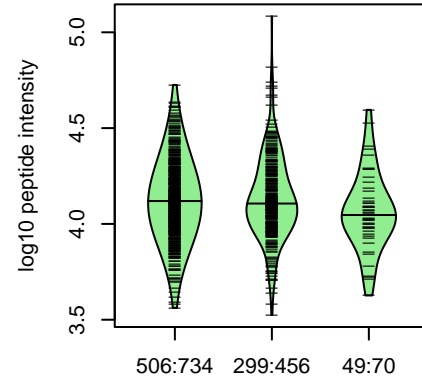

1:19968058:T:C\_C  
 $\rho = 0.59$ ,  $\beta = -0.0303$ ,  $N = 854$

**LALFPDK pc2**  
**A0A087WTY6;P41271;P41271-2**

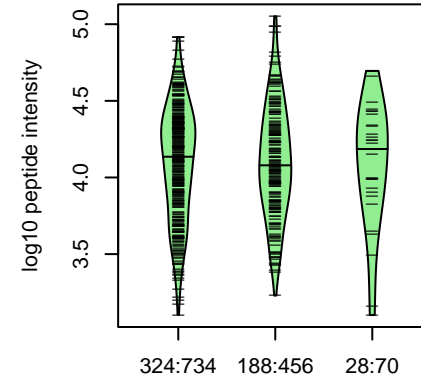

1:19968058:T:C\_C  
 $\rho = 0.98$ ,  $\beta = 0.00178$ ,  $N = 540$

Assay Target: NBL1  
 Olink UniProt: P41271  
 UKB rsID: rs12408663  
 Proxy rsID: rs12408663  
 UKB SNP: 1:19968058:T:C  
 Proxy SNP: 1:19968058:T:C  
 UKB log10(p): 55.9  
 UKB BETA: -0.114  
 -:-:-:-  
 1030:854:540:517

**ANXA5 : NP1  
P08758**

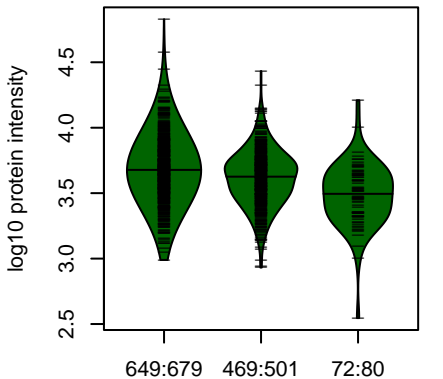

4:122595981:C:A\_A  
p = 4.6e-12, beta = -0.325, N = 1190

**FITIFGTR pc2  
D6RBE9;D6RBL5;P08758**

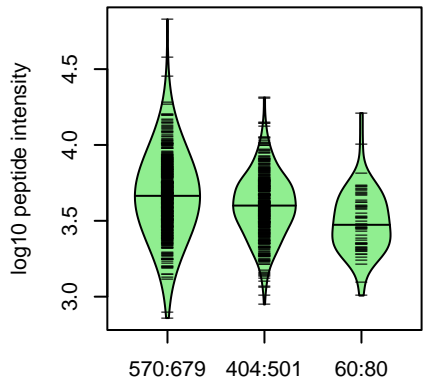

4:122595981:C:A\_A  
p = 4.3e-11, beta = -0.334, N = 1034

**GTVTDFPGFDER pc2  
D6RBE9;D6RCN3;E9PHT9;P08758**

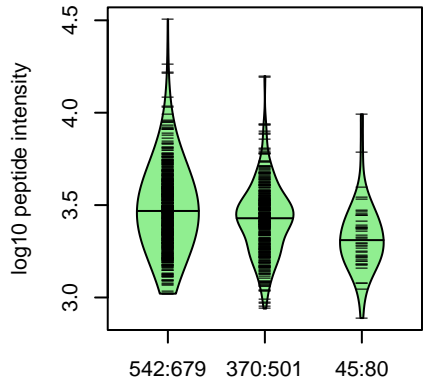

4:122595981:C:A\_A  
p = 7.8e-07, beta = -0.269, N = 957

**SEIDLFNIR pc2  
D6RBE9;D6RBL5;P08758**

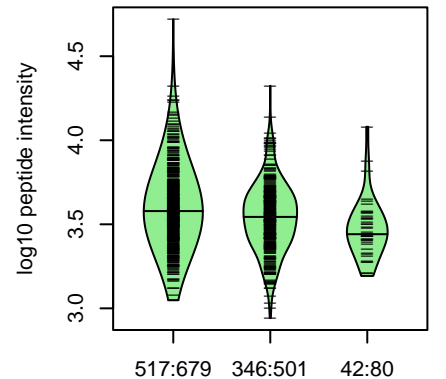

4:122595981:C:A\_A  
p = 1.6e-05, beta = -0.243, N = 905

**NFATSLYSMIK pc2  
D6RBE9;D6RBL5;P08758**

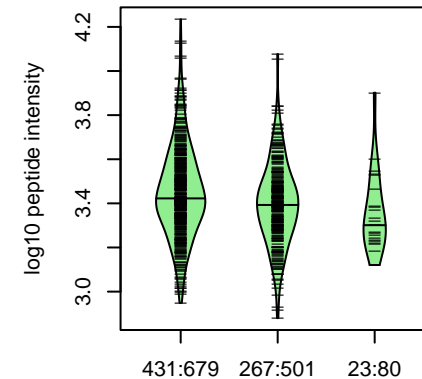

4:122595981:C:A\_A  
p = 9e-04, beta = -0.22, N = 721

**ANXA5 : NP1  
P08758**

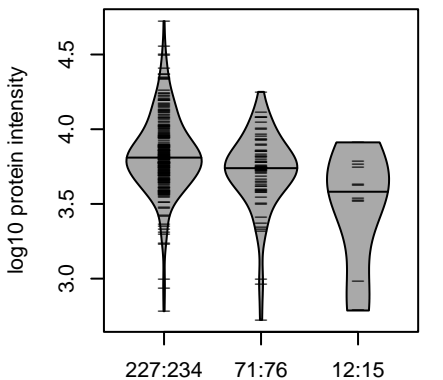

4:122595981:C:A\_A  
p = 4.1e-05, beta = -0.422, N = 310

**FITIFGTR pc2  
D6RBE9;D6RBL5;P08758**

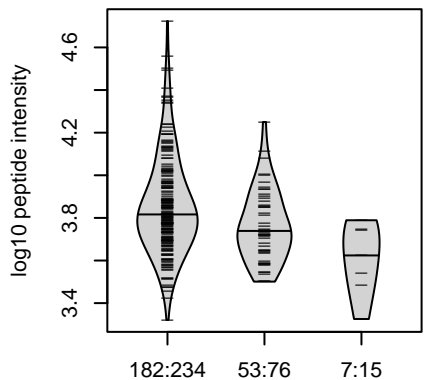

4:122595981:C:A\_A  
p = 5.3e-05, beta = -0.495, N = 242

**GTVTDFPGFDER pc2  
D6RBE9;D6RCN3;E9PHT9;P08758**

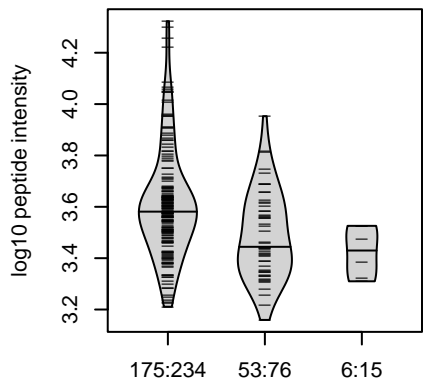

4:122595981:C:A\_A  
p = 0.00014, beta = -0.48, N = 234

**GLGTDEESILLLLTSR pc2  
E9PHT9;P08758**

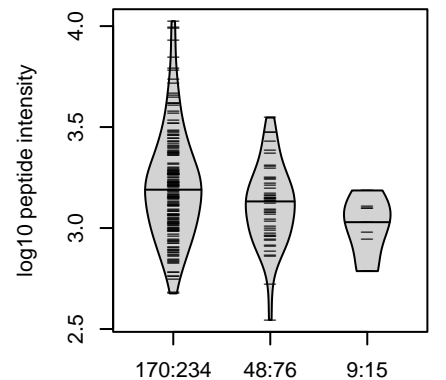

4:122595981:C:A\_A  
p = 0.0031, beta = -0.358, N = 227

**SEIDLFNIR pc2  
D6RBE9;D6RBL5;P08758**

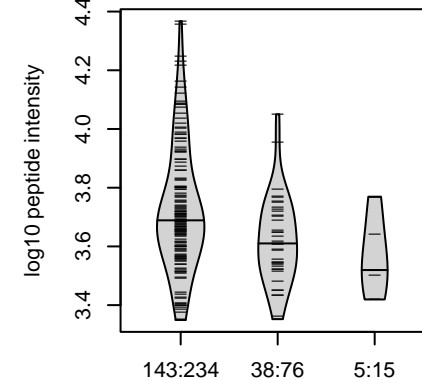

4:122595981:C:A\_A  
p = 0.0012, beta = -0.463, N = 186

Assay Target: ANXA5  
Olink UniProt: P08758  
UKB rsID: rs73844249  
Proxy rsID: rs73844249  
UKB SNP: 4:122595981:C:A  
Proxy SNP: 4:122595981:C:A  
UKB log10(p): 55.5  
UKB BETA: -0.11  
\*:\*:\*:\*:\*:-:-:-:-:-:NA  
1034:957:905:721:641:579:208:

**CDH2 : NP2  
P19022**

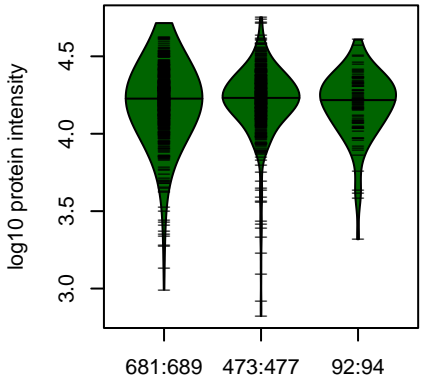

18:25686372:T:C\_C  
p = 0.96, beta = 0.00218, N = 1246

**FLIYAQDK pc2  
A0A6Q8PF58;C9J126;P19022-2;P19**

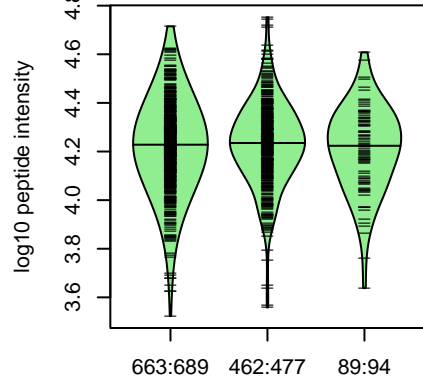

18:25686372:T:C\_C  
p = 0.78, beta = 0.0124, N = 1214

**DVHEGQPLLNVK pc3  
P19022**

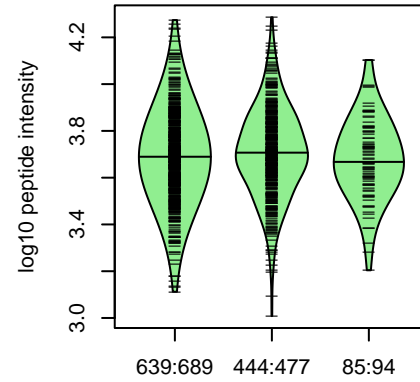

18:25686372:T:C\_C  
p = 0.55, beta = 0.0276, N = 1168

**VQYESSEPADFK pc2  
P19022-2;P19022**

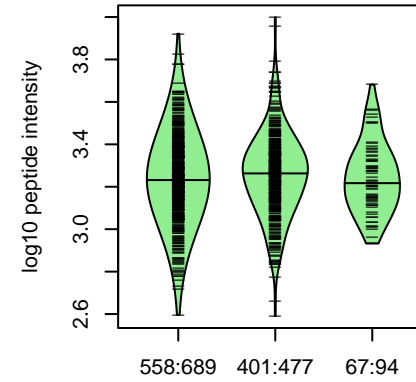

18:25686372:T:C\_C  
p = 0.29, beta = 0.0535, N = 1026

**VDEDGMVYAVR pc2  
P19022-2;P19022**

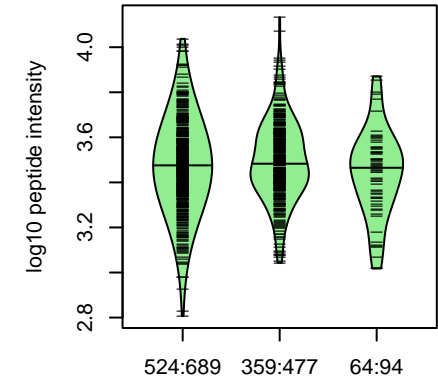

18:25686372:T:C\_C  
p = 0.85, beta = 0.00969, N = 947

**CDH2 : NP2  
P19022**

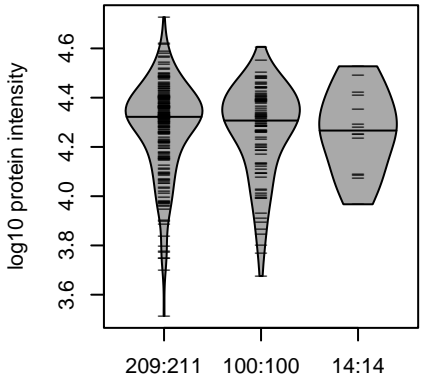

18:25686372:T:C\_C  
p = 0.45, beta = -0.0722, N = 323

**FLIYAQDK pc2  
A0A6Q8PF58;C9J126;P19022-2;P19**

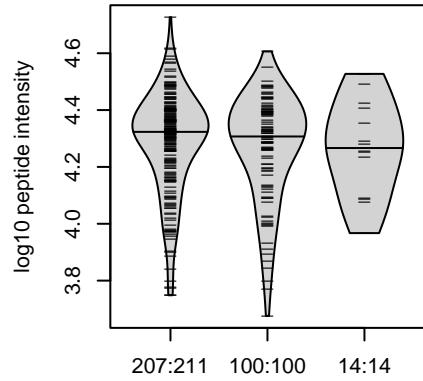

18:25686372:T:C\_C  
p = 0.41, beta = -0.0789, N = 321

**VDEDGMVYAVR pc2  
P19022-2;P19022**

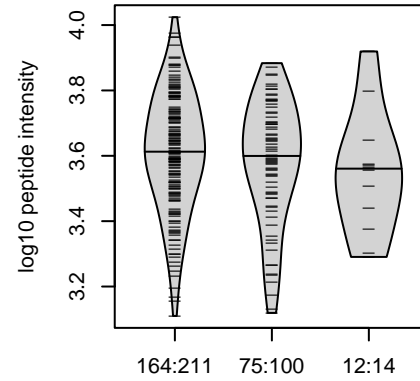

18:25686372:T:C\_C  
p = 0.12, beta = -0.168, N = 251

**DVHEGQPLLNVK pc2  
P19022**

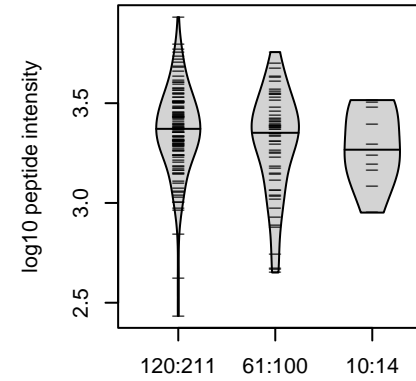

18:25686372:T:C\_C  
p = 0.059, beta = -0.226, N = 191

Assay Target: CDH2  
Olink UniProt: P19022  
UKB rsID: rs12457737  
Proxy rsID: rs12457737  
UKB SNP: 18:25686372:T:C  
Proxy SNP: 18:25686372:T:C  
UKB log10(p): 55.1  
UKB BETA: -0.096  
-----  
1214:1168:1026:947:940:308:22

**TXNDC5 : NP4  
Q8NBS9**

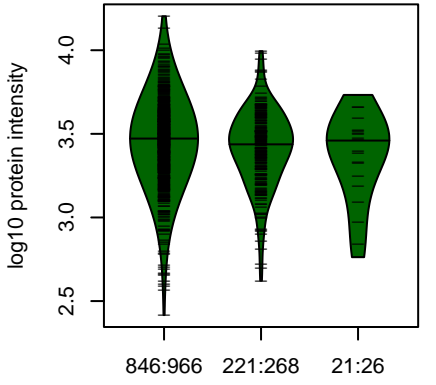

6:7882205:G:A\_A  
p = 0.014, beta = -0.157, N = 1088

**GYPTLLLFR pc2  
Q8NBS9;Q8NBS9-2**

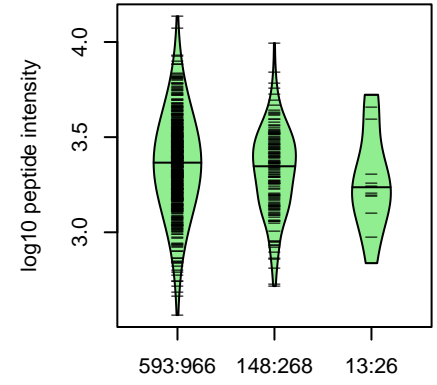

6:7882205:G:A\_A  
p = 0.027, beta = -0.174, N = 754

**IAEVDCTAER pc2  
Q8NBS9;Q8NBS9-2**

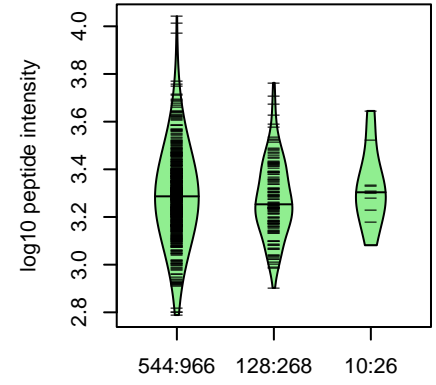

6:7882205:G:A\_A  
p = 0.52, beta = -0.055, N = 682

**ALAPTWEQLALGLEHSETVK pc3  
Q8NBS9;Q8NBS9-2**

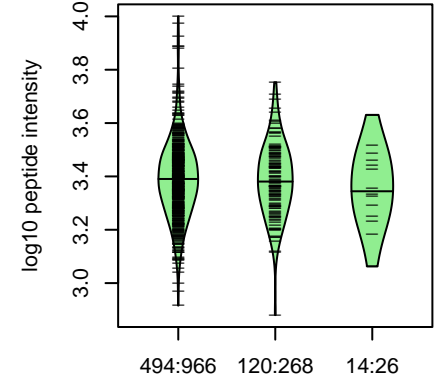

6:7882205:G:A\_A  
p = 0.87, beta = 0.0136, N = 628

**GYPTLLWFR pc2  
Q8NBS9;Q8NBS9-2**

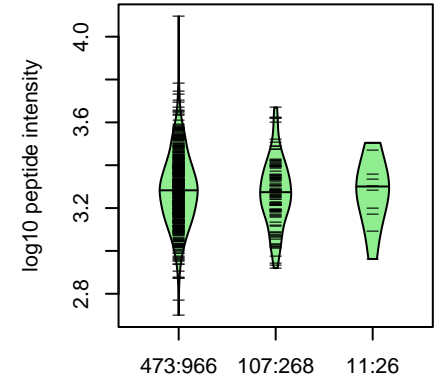

6:7882205:G:A\_A  
p = 0.56, beta = -0.0526, N = 591

**TXNDC5 : NP4  
Q8NBS9**

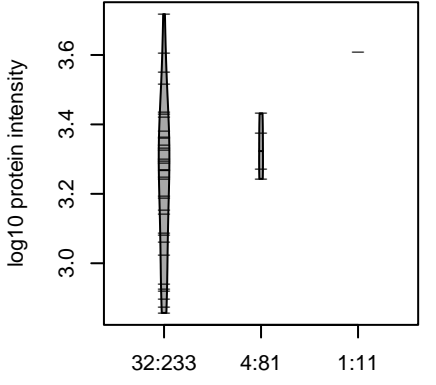

6:7882205:G:A\_A  
p = 0.08, beta = 0.612, N = 37

**ALAPTWEQLALGLEHSETVK pc3  
Q8NBS9;Q8NBS9-2**

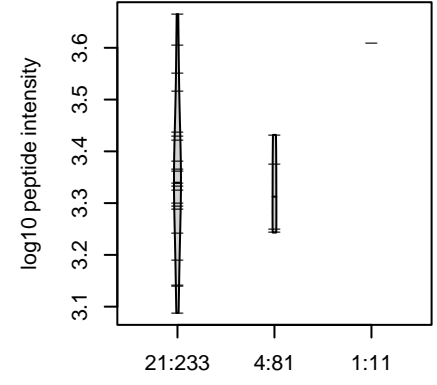

6:7882205:G:A\_A  
p = 0.21, beta = 0.451, N = 26

Assay Target: TXNDC5  
Olink UniProt: Q8NBS9  
UKB rsID: rs7764128  
Proxy rsID: rs7764128  
UKB SNP: 6:7882205:G:A  
Proxy SNP: 6:7882205:G:A  
UKB log10(p): 53.8  
UKB BETA: -0.148  
-----  
754:682:628:591:582:500:471:3



**ENO3 : NP4  
P13929**

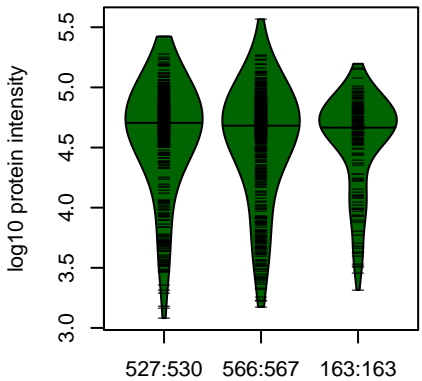

17:4835217:T:C\_T  
p = 0.011, beta = -0.105, N = 1256

**AAVPSGASTGIYEALR pc2  
3;A0A2R8YEG5;F5H0C8;P09104-2;P1Y6G6;P09104-2;P13929;P13929-3;P06;F5H0C8;P09104-2;P13929;P13929-3**

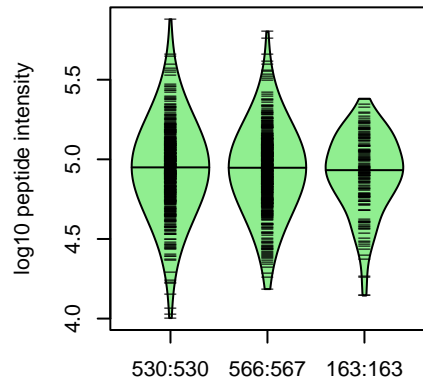

17:4835217:T:C\_T  
p = 0.22, beta = -0.0506, N = 1259

**FGANAILGVSLAVCK pc2**

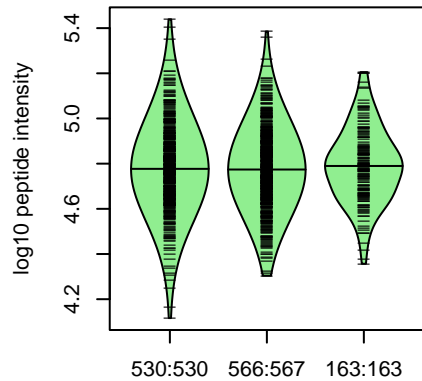

17:4835217:T:C\_T  
p = 0.93, beta = 0.00355, N = 1259

**SGETEDTFIADLVVGLCTGQIK pc3ADLAGNPDLILPVPFNVINGGSHAGN  
P13929;P13929-3**

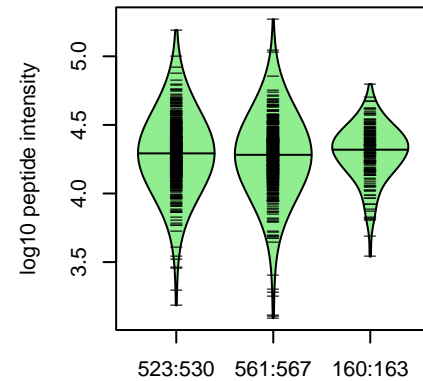

17:4835217:T:C\_T  
p = 0.53, beta = -0.026, N = 1244

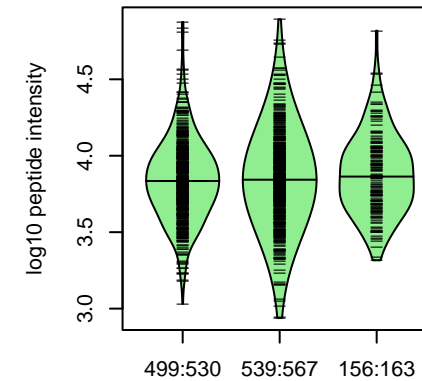

17:4835217:T:C\_T  
p = 0.33, beta = 0.0408, N = 1194

**ENO3 : NP4  
P13929**

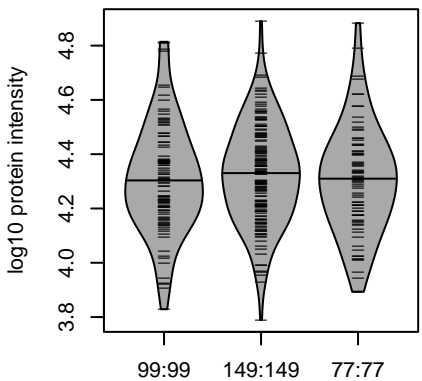

17:4835217:T:C\_T  
p = 0.4, beta = -0.0627, N = 325

**AAVPSGASTGIYEALR pc2  
3;A0A2R8YEG5;F5H0C8;P09104-2;P1**

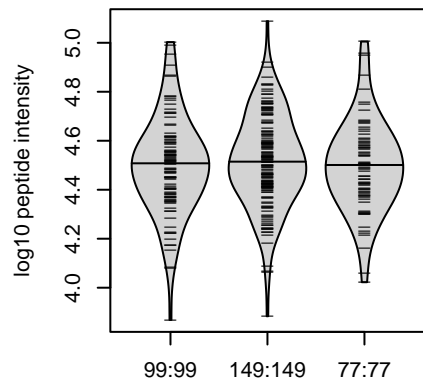

17:4835217:T:C\_T  
p = 0.37, beta = -0.0672, N = 325

**VNQIGSVTESIQACK pc2  
P13929;P13929-3**

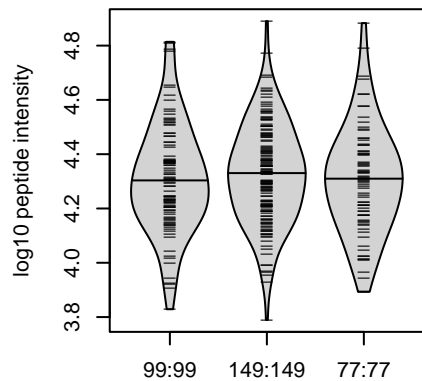

17:4835217:T:C\_T  
p = 0.4, beta = -0.0627, N = 325

**SGETEDTFIADLVVGLCTGQIK pc3  
6;F5H0C8;P09104-2;P13929;P13929-Y6G6;P09104-2;P13929;P13929-3;P0**

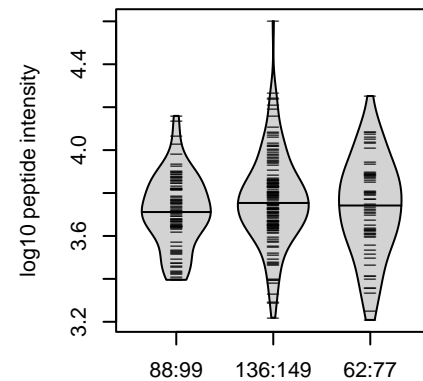

17:4835217:T:C\_T  
p = 0.21, beta = 0.101, N = 286

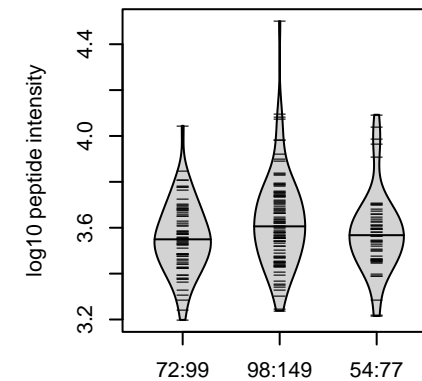

17:4835217:T:C\_T  
p = 0.29, beta = 0.0931, N = 224

**AVENINNTLGPALLQK pc2  
rs238238 REF**

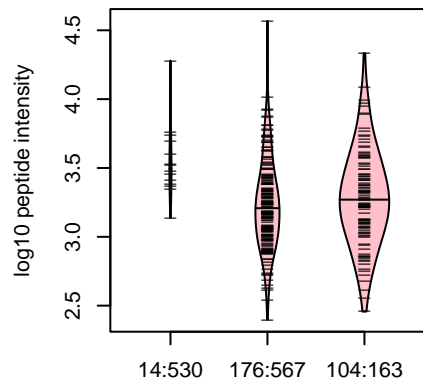

17:4835217:T:C\_T  
p = 1.5e-59, model = REC, N = 294

**AVENINSTLGPALLQK pc2  
rs238238 ALT**

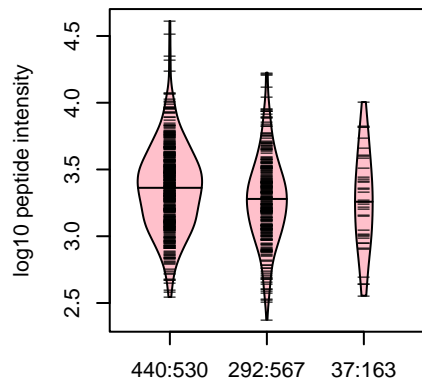

17:4835217:T:C\_T  
p = 1.7e-44, model = REC, N = 769

**LSVVDQEK pc2  
rs238239 REF**

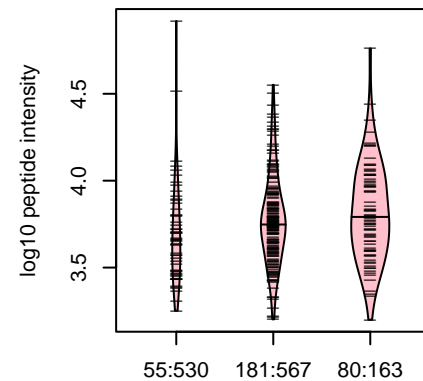

17:4835217:T:C\_T  
p = 1.8e-26, model = REC, N = 316

**AVENINSTLGPALLQK pc3  
rs238238 ALT**

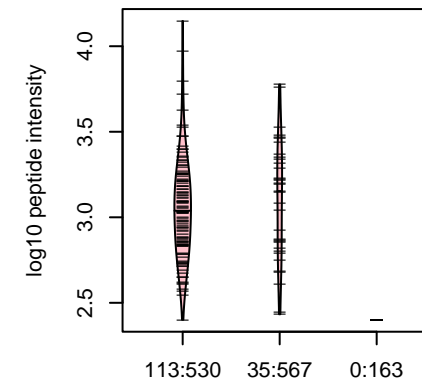

17:4835217:T:C\_T  
p = 3.7e-19, model = REC, N = 148

Assay Target: ENO3  
Olink UniProt: P13929  
UKB rsID: rs2243090  
Proxy rsID: rs2243090  
UKB SNP: 17:4835217:T:C  
Proxy SNP: 17:4835217:T:C  
UKB log10(p): 52.8  
UKB BETA: -0.094  
-----  
1259:1259:1244:1194:1079:100

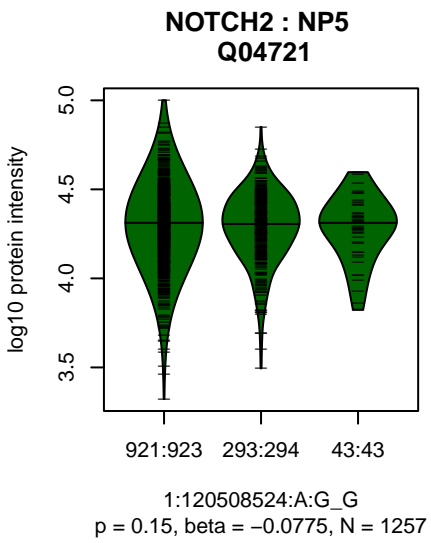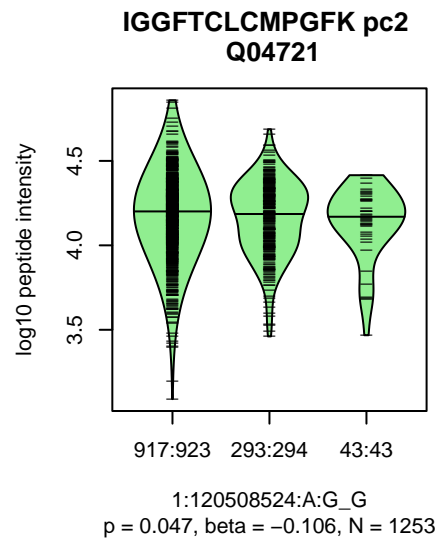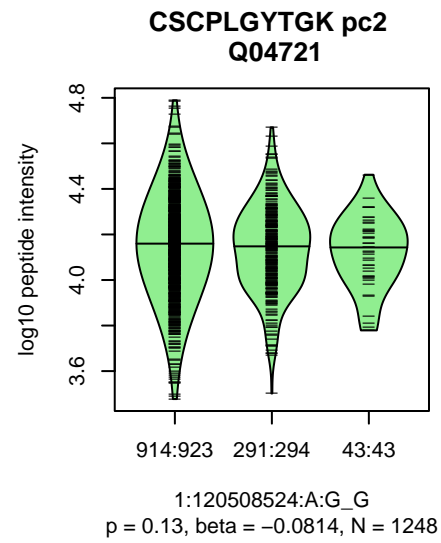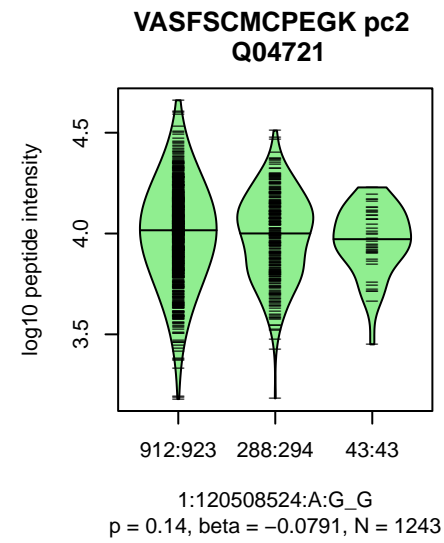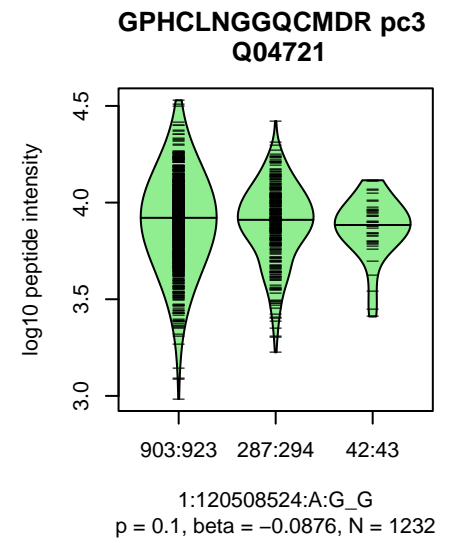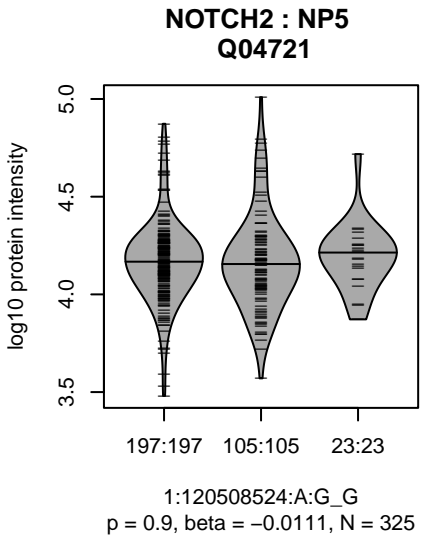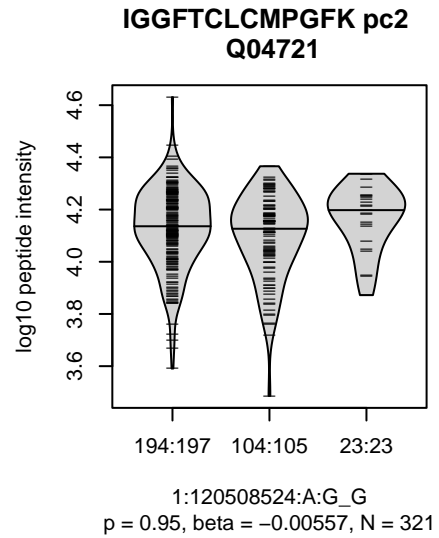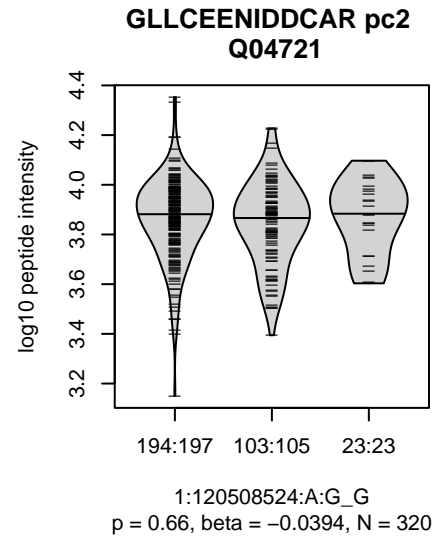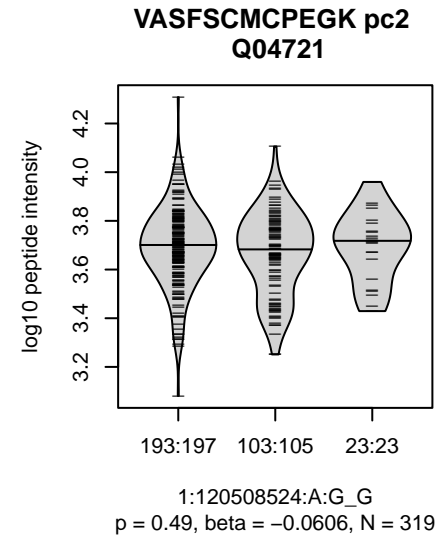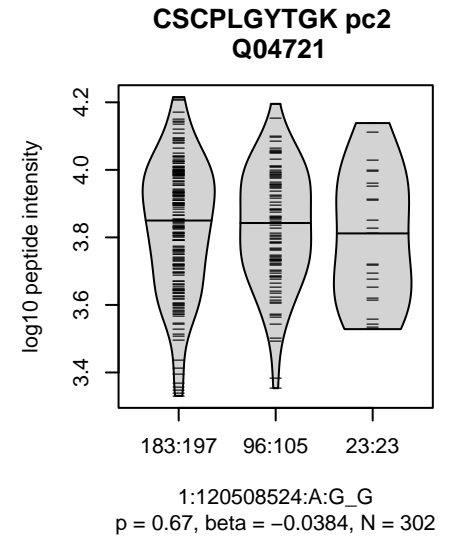

Assay Target: NOTCH2  
 Olink UniProt: Q04721  
 UKB rsID: rs2453044  
 Proxy rsID: rs2453044  
 UKB SNP: 1:120508524:A:G  
 Proxy SNP: 1:120508524:A:G  
 UKB log10(p): 50.4  
 UKB BETA: -0.131  
 -----  
 1253:1248:1243:1232:1198:118





**FABP4 : NP2**  
**P15090**

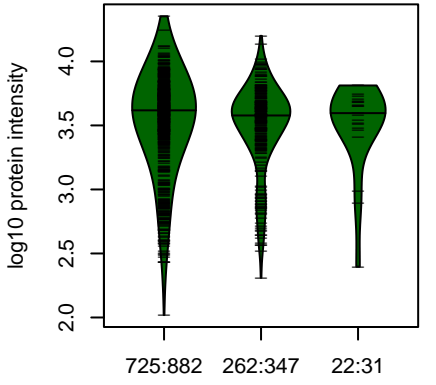

8:82399883:A:T\_T  
p = 0.051, beta = -0.121, N = 1009

**LVVECVMK pc2**  
**P15090**

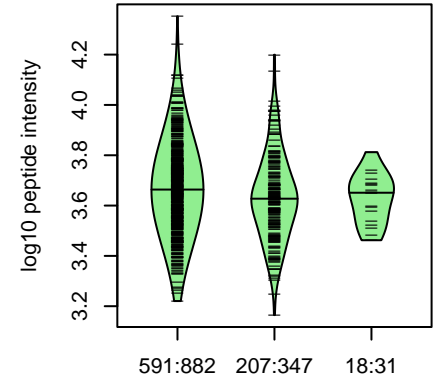

8:82399883:A:T\_T  
p = 0.011, beta = -0.176, N = 816

**PNMIISVNGDVITIK pc2**  
**P15090**

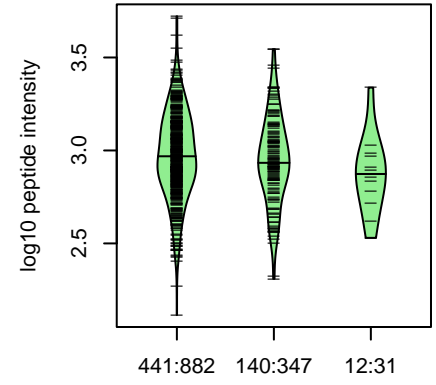

8:82399883:A:T\_T  
p = 0.16, beta = -0.117, N = 593

**STITLDGGVLHVQK pc2**  
**P15090**

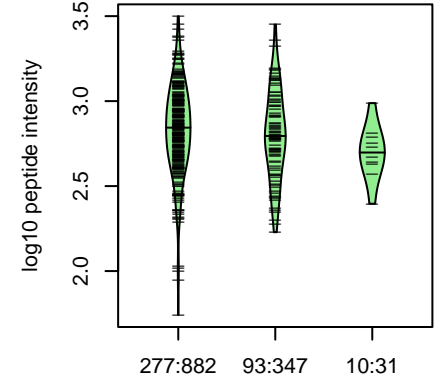

8:82399883:A:T\_T  
p = 0.077, beta = -0.175, N = 380

**LVSSNFDDYMK pc2**  
**E5RH45;E5RIR0;P02689;P15090**

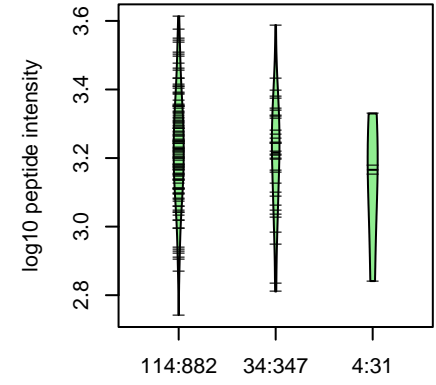

8:82399883:A:T\_T  
p = 0.35, beta = -0.147, N = 152

**FABP4 : NP2**  
**P15090**

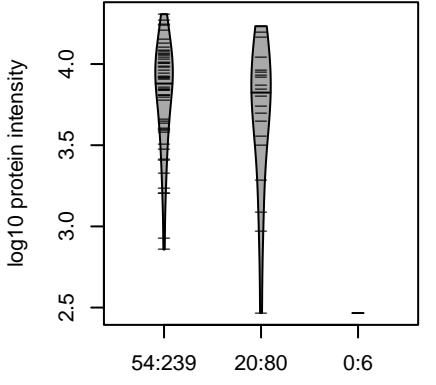

8:82399883:A:T\_T  
p = 0.42, beta = -0.203, N = 74

**LVSSNFDDYMK pc2**  
**E5RH45;E5RIR0;P02689;P15090**

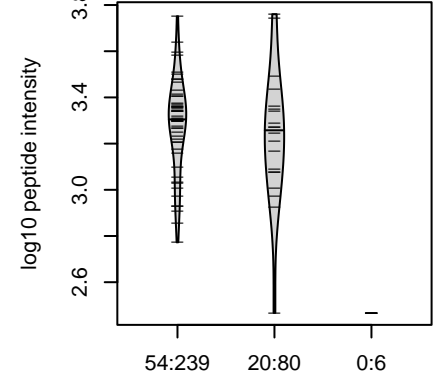

8:82399883:A:T\_T  
p = 0.71, beta = -0.0931, N = 74

Assay Target: FABP4  
Olink UniProt: P15090  
UKB rsID: rs72684474  
Proxy rsID: rs72684474  
UKB SNP: 8:82399883:A:T  
Proxy SNP: 8:82399883:A:T  
UKB log10(p): 50  
UKB BETA: -0.115  
-.-.-.-.\*  
816:593:380:152:149

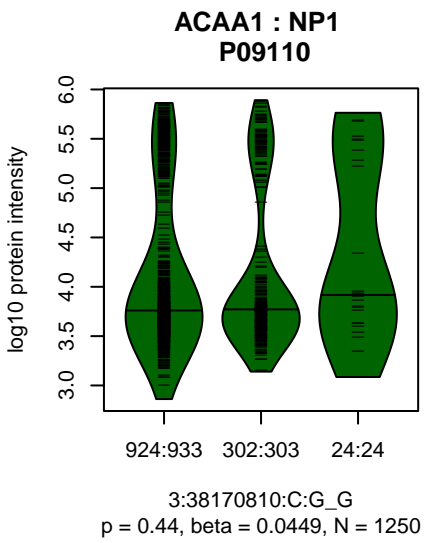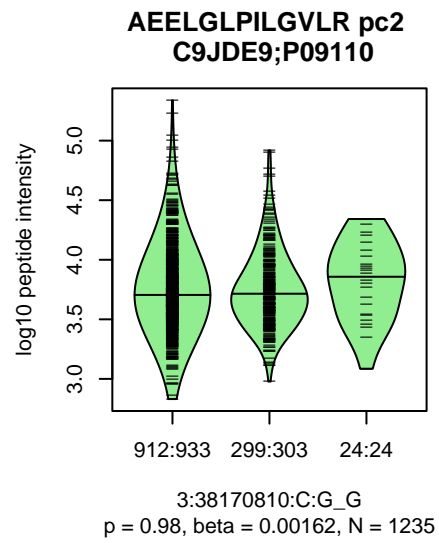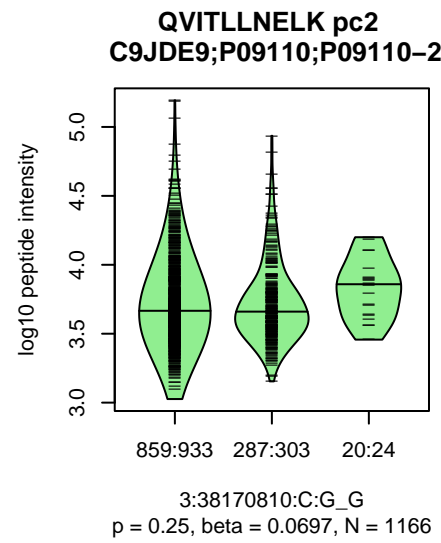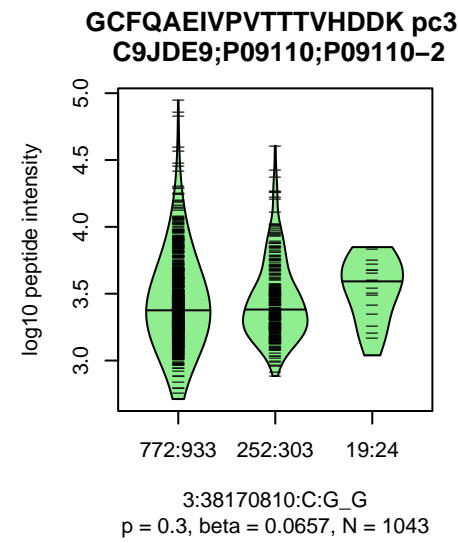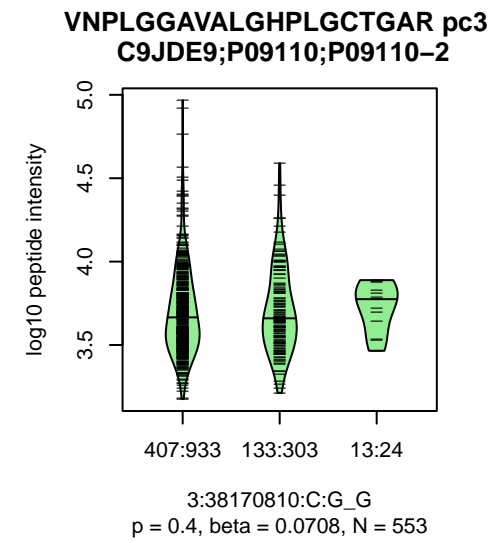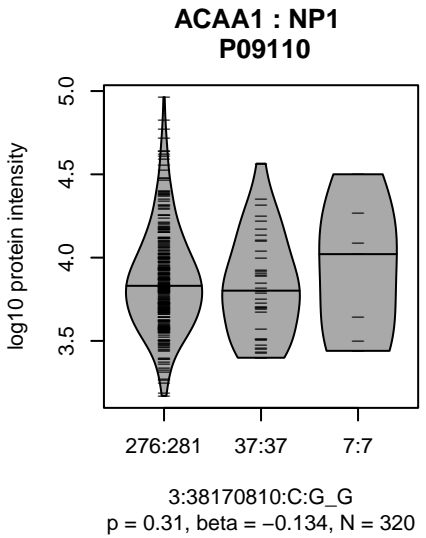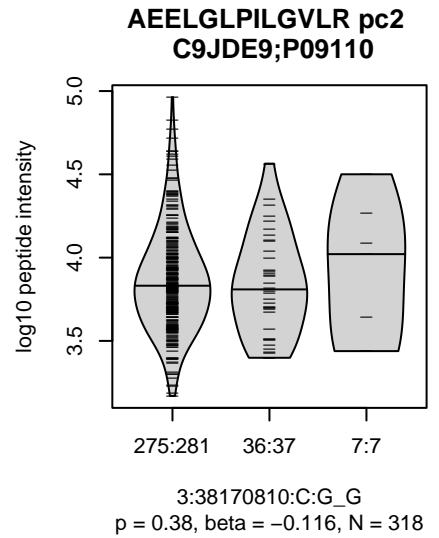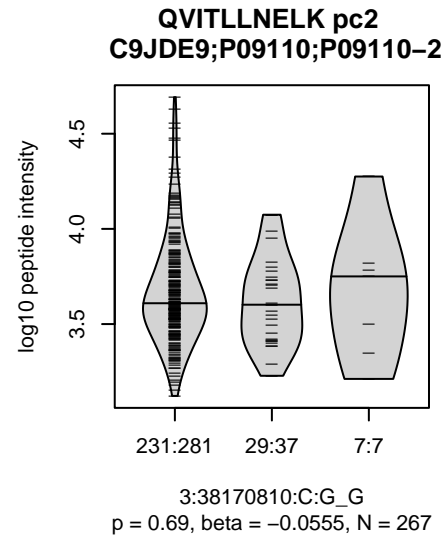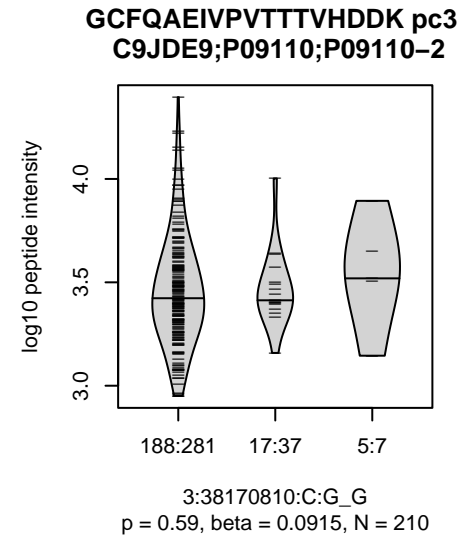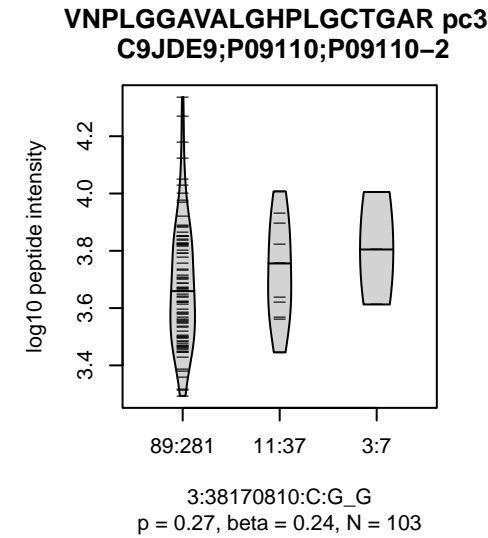

Assay Target: ACAA1  
 Olink UniProt: P09110  
 UKB rsID: rs156265  
 Proxy rsID: rs156265  
 UKB SNP: 3:38170810:C:G  
 Proxy SNP: 3:38170810:C:G  
 UKB log10(p): 49.4  
 UKB BETA: -0.133  
 -----NA  
 1235:1166:1043:553:391:327:30

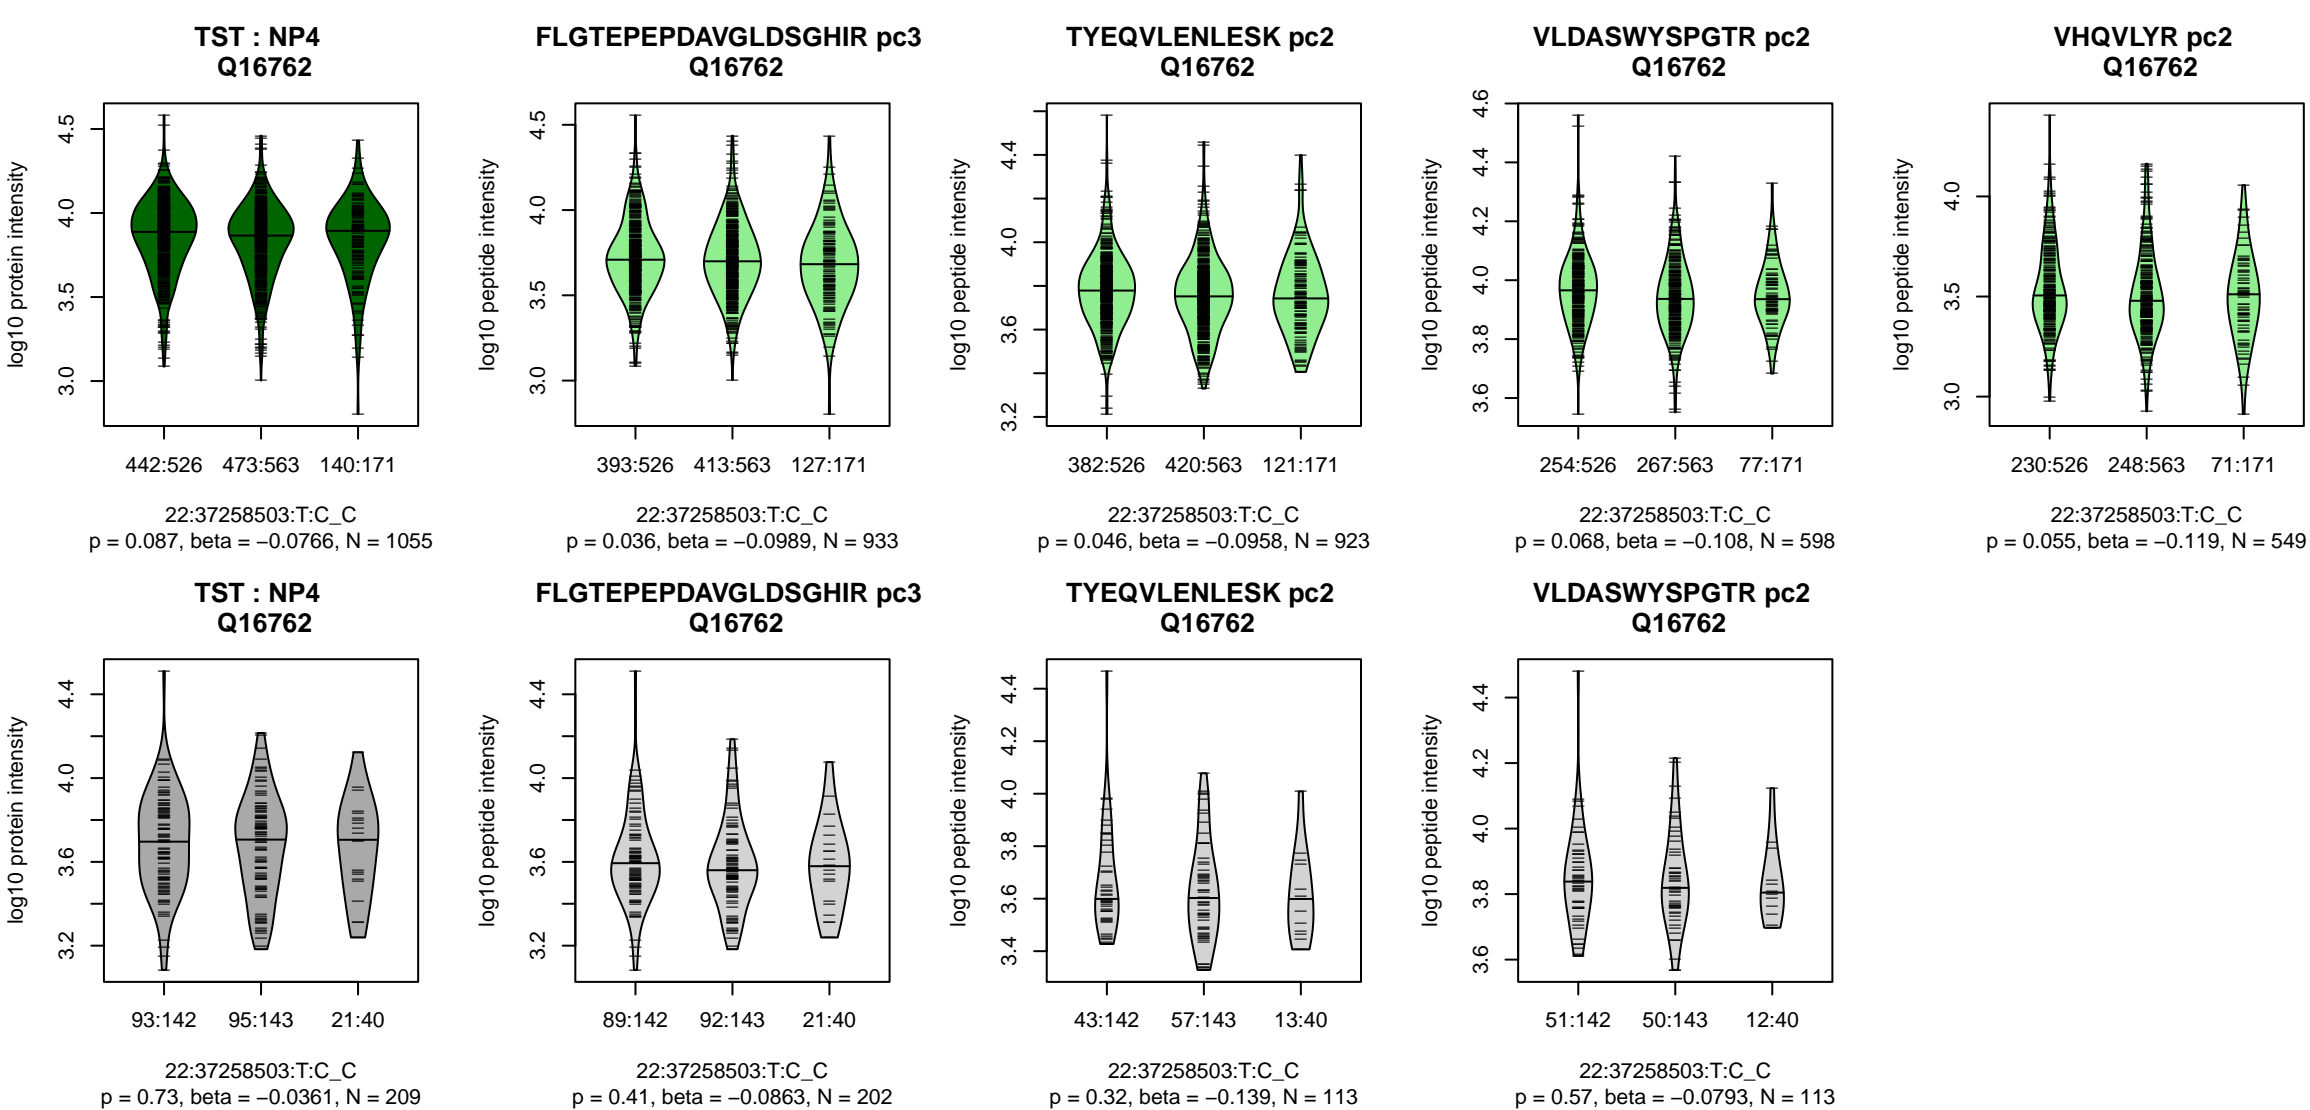

Assay Target: TST  
 Olink UniProt: Q16762  
 UKB rsID: rs4821544  
 Proxy rsID: rs4821544  
 UKB SNP: 22:37258503:T:C  
 Proxy SNP: 22:37258503:T:C  
 UKB log<sub>10</sub>(p): 49.3  
 UKB BETA: -0.101  
 - - - - -  
 933:923:598:549:402:133:71:53

**VWF : NP4  
P04275**

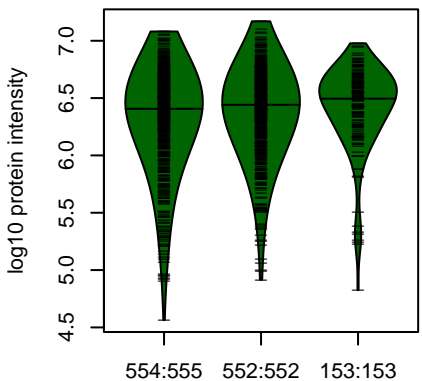

12:6141449:G:A\_A  
p = 0.027, beta = 0.0917, N = 1259

**AHLLSLVDVMQR pc3  
P04275**

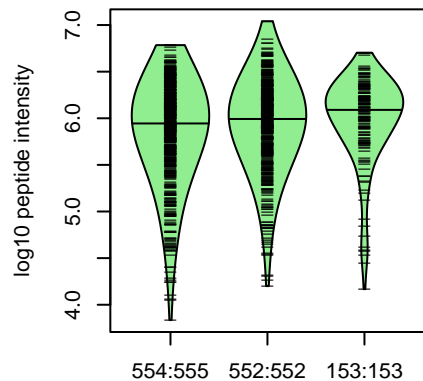

12:6141449:G:A\_A  
p = 0.019, beta = 0.0967, N = 1259

**CMVQVGVISGFK pc2  
P04275**

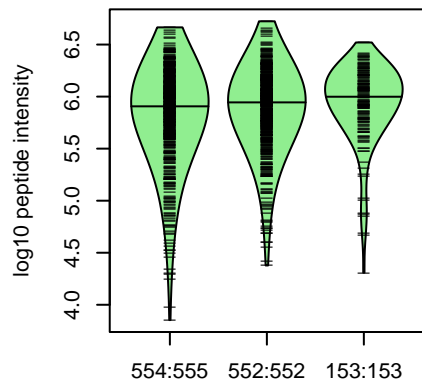

12:6141449:G:A\_A  
p = 0.023, beta = 0.0941, N = 1259

**EAPDLVLQR pc2  
P04275**

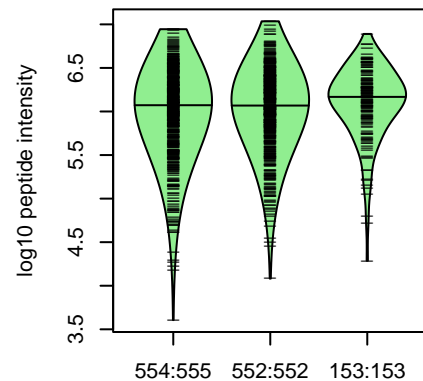

12:6141449:G:A\_A  
p = 0.052, beta = 0.0802, N = 1259

**EGGPSIQGDALGFVAVR pc2  
P04275**

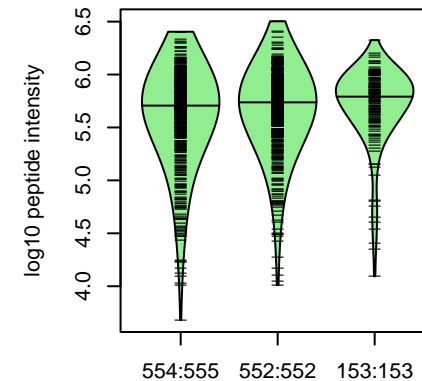

12:6141449:G:A\_A  
p = 0.048, beta = 0.0817, N = 1259

**VWF : NP4  
P04275**

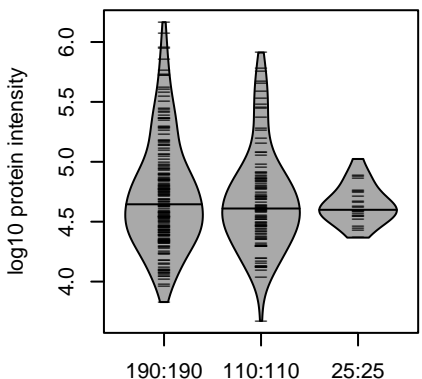

12:6141449:G:A\_A  
p = 0.35, beta = -0.08, N = 325

**APTCGLCEVAR pc2  
P04275**

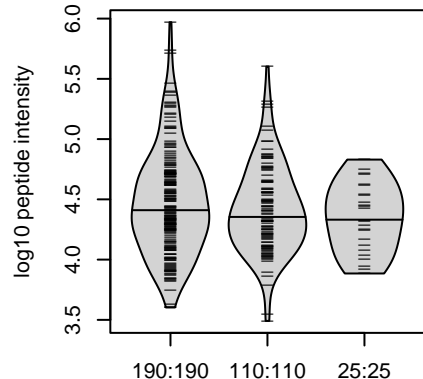

12:6141449:G:A\_A  
p = 0.088, beta = -0.147, N = 325

**EFMEEVIQR pc2  
P04275**

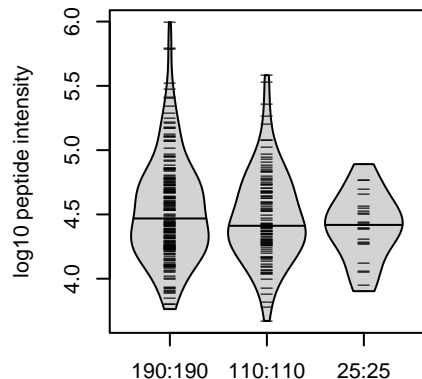

12:6141449:G:A\_A  
p = 0.072, beta = -0.155, N = 325

**ILTSDVFQDCNK pc2  
P04275**

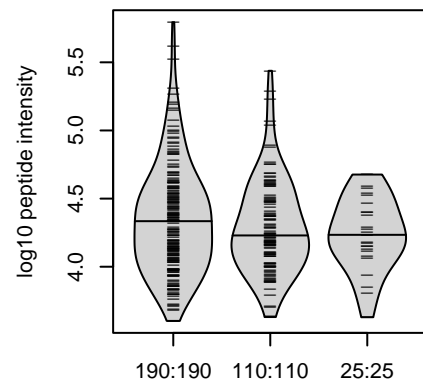

12:6141449:G:A\_A  
p = 0.097, beta = -0.143, N = 325

**VIVIPVGIGPHANLK pc3  
P04275**

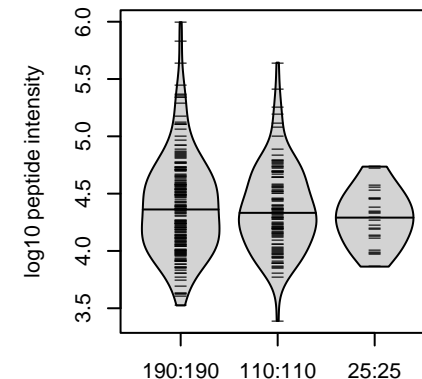

12:6141449:G:A\_A  
p = 0.29, beta = -0.0911, N = 325

**AEGLECAK pc2  
rs1063856 ALT**

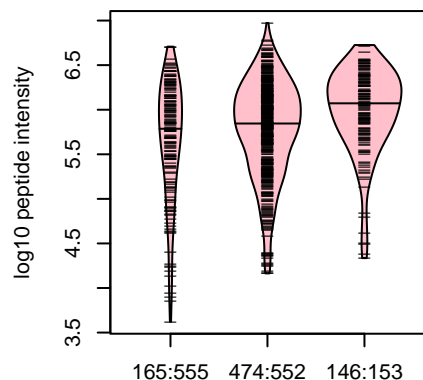

12:6141449:G:A\_A  
p = 5.3e-105, model = REC, N = 785

**AEGLECTK pc2  
rs1063856 REF**

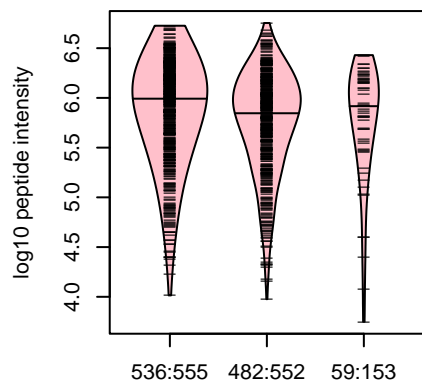

12:6141449:G:A\_A  
p = 1.1e-49, model = DOM, N = 1077

**ITLLMASQEPQR pc2  
rs216311 REF**

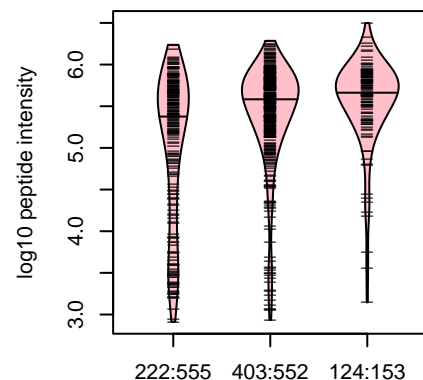

12:6141449:G:A\_A  
p = 5.6e-36, model = REC, N = 749

**LVCPADNLR AEGLECAK pc3  
rs1063856 ALT**

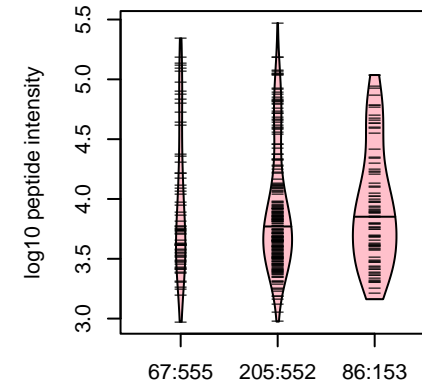

12:6141449:G:A\_A  
p = 8.5e-32, model = REC, N = 358

Assay Target: VWF  
Olink UniProt: P04275  
UKB rsID: rs68120218  
Proxy rsID: rs68120218  
UKB SNP: 12:6141449:G:A  
Proxy SNP: 12:6141449:G:A  
UKB log10(p): 49  
UKB BETA: 0.094  
-----  
1259:1259:1259:1259:1259:125

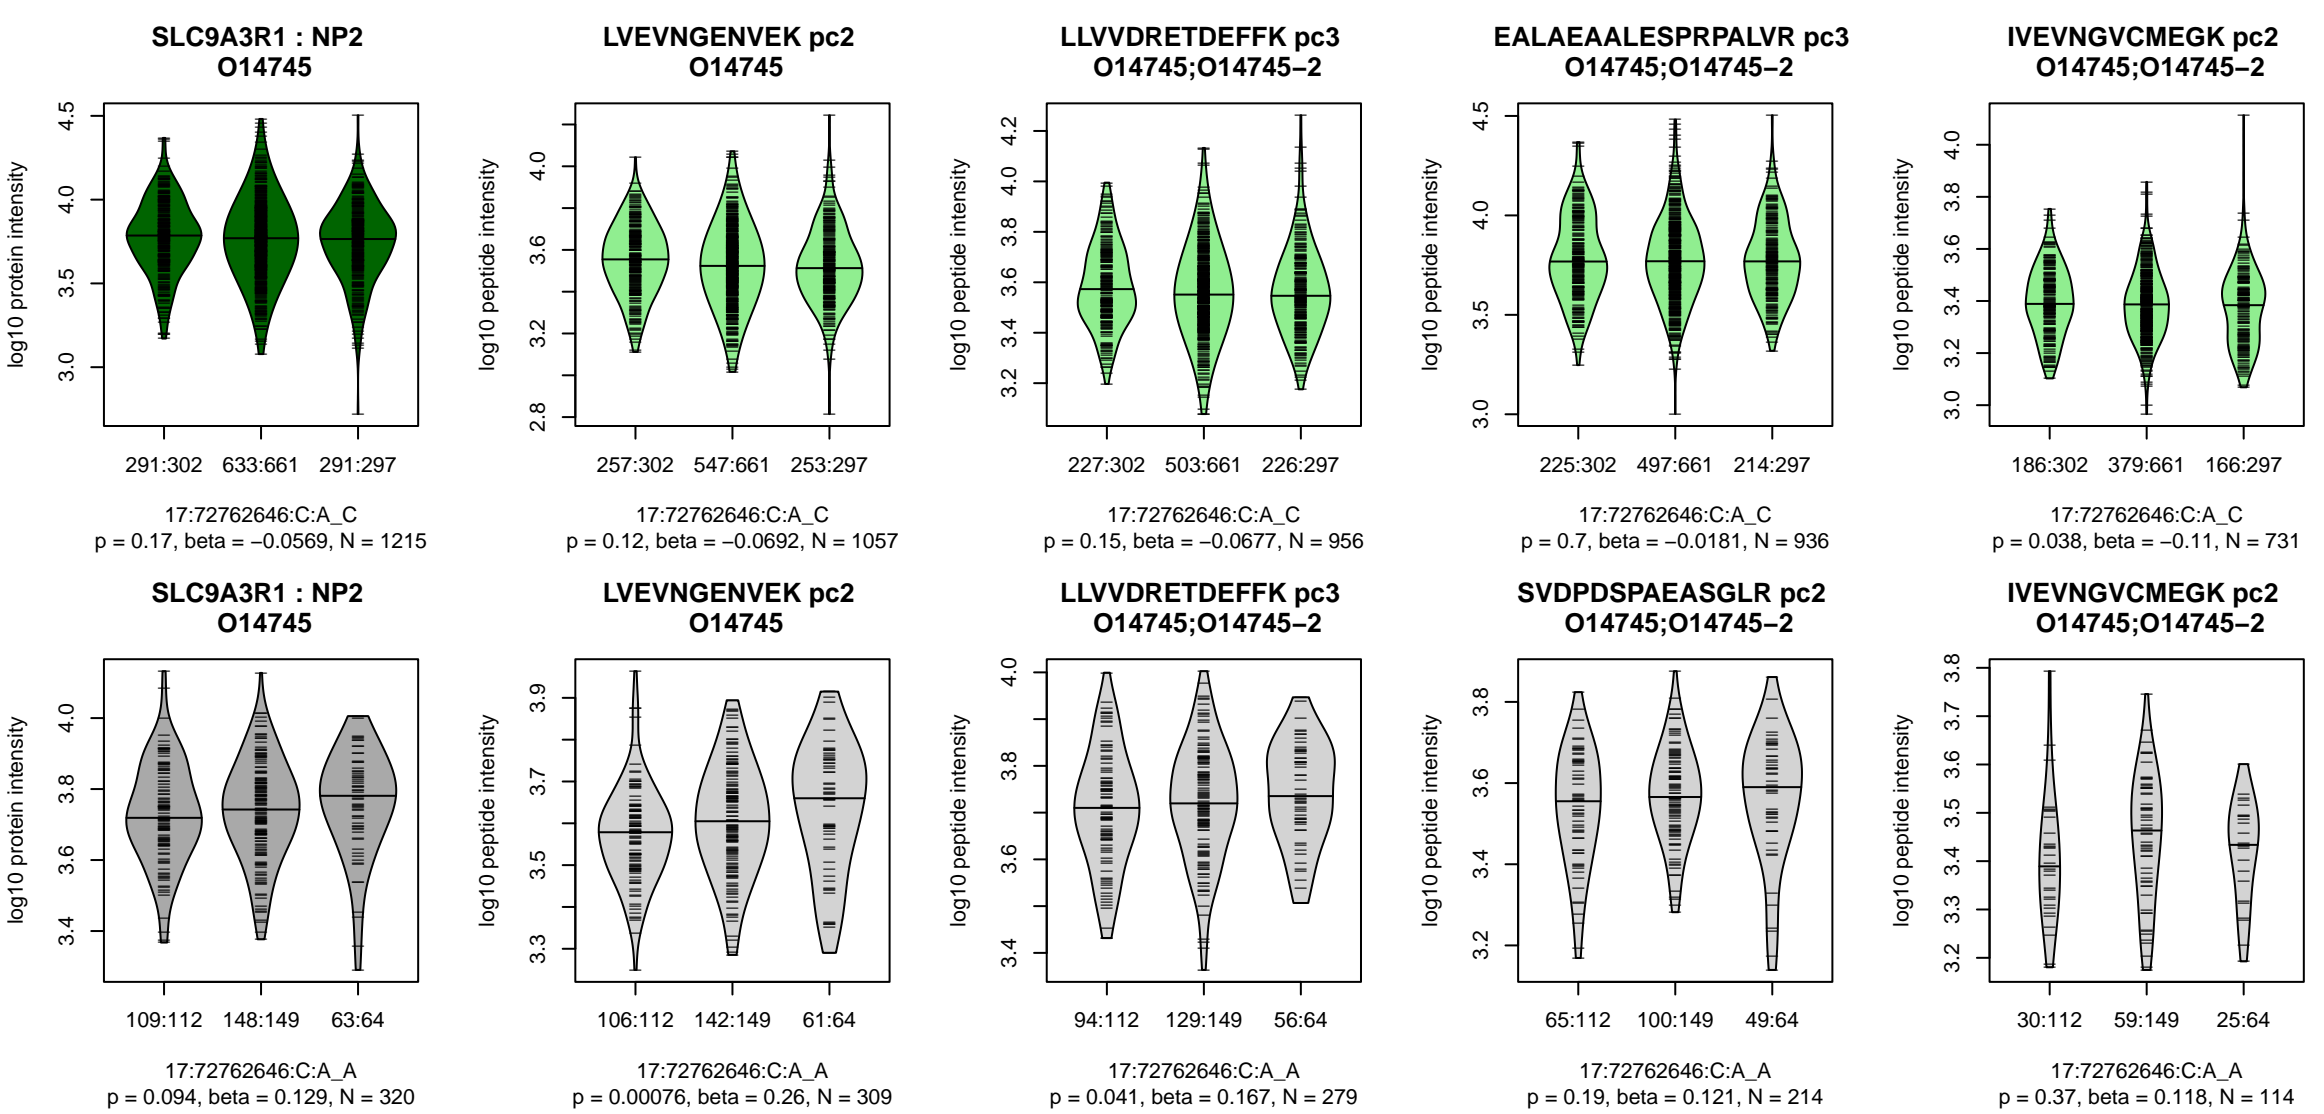

Assay Target: SLC9A3R1  
 Olink UniProt: O14745  
 UKB rsID: rs8064299  
 Proxy rsID: rs8064299  
 UKB SNP: 17:72762646:C:A  
 Proxy SNP: 17:72762646:C:A  
 UKB log10(p): 48.8  
 UKB BETA: 0.092  
 -----  
 1057:956:936:731:677:603:190:

**GAL : NP2  
P22466**

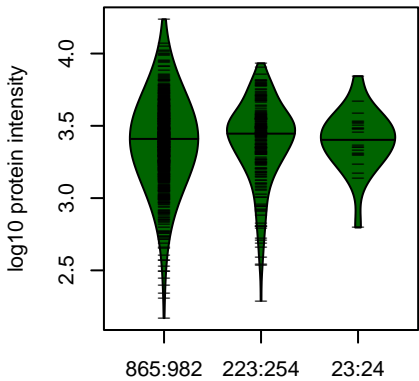

11:68440107:C:T\_T  
p = 0.22, beta = 0.0772, N = 1111

**LLDLPAAASSEDIERS pc2  
P22466**

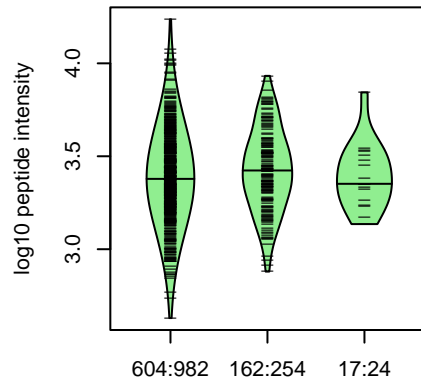

11:68440107:C:T\_T  
p = 0.016, beta = 0.177, N = 783

**ELRPEDDMK pc2  
P22466**

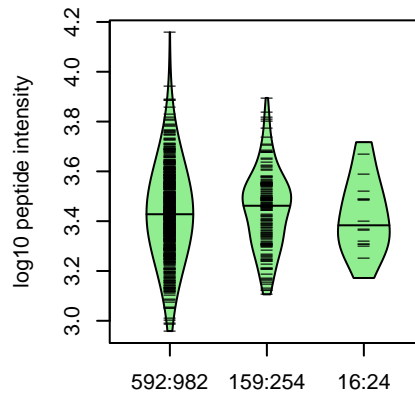

11:68440107:C:T\_T  
p = 0.45, beta = 0.0566, N = 767

**TIIEFLSFLHLK pc2  
P22466**

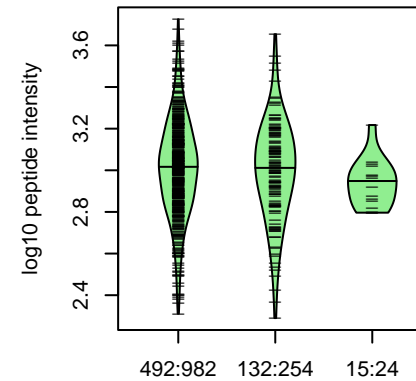

11:68440107:C:T\_T  
p = 0.2, beta = -0.103, N = 639

**LLDLPAAASSEDIERS pc2  
P22466**

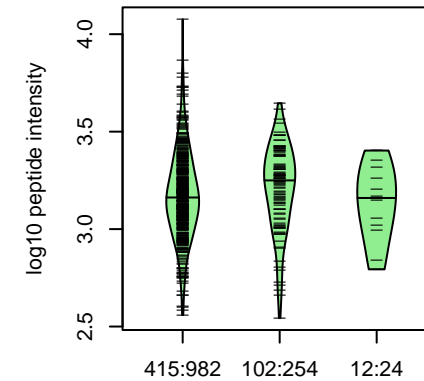

11:68440107:C:T\_T  
p = 0.27, beta = 0.1, N = 529

**GAL : NP2  
P22466**

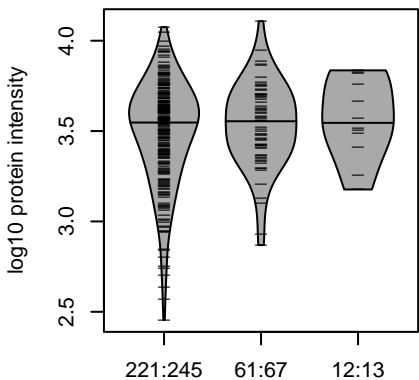

11:68440107:C:T\_T  
p = 0.81, beta = -0.0254, N = 294

**LLDLPAAASSEDIERS pc2  
P22466**

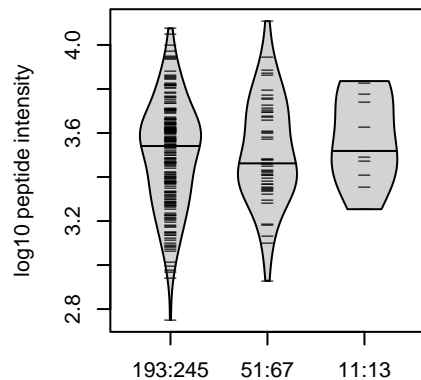

11:68440107:C:T\_T  
p = 0.7, beta = -0.0445, N = 255

**ELRPEDDMK pc2  
P22466**

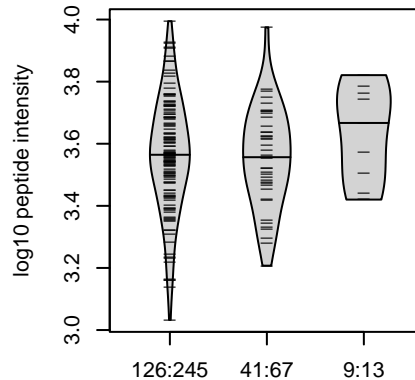

11:68440107:C:T\_T  
p = 0.29, beta = -0.138, N = 176

**TIIEFLSFLHLK pc2  
P22466**

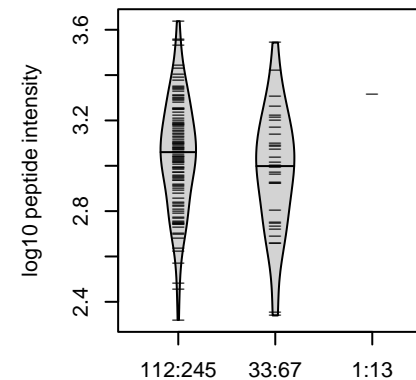

11:68440107:C:T\_T  
p = 0.091, beta = -0.308, N = 146

**LLDLPAAASSEDIERS pc2  
P22466**

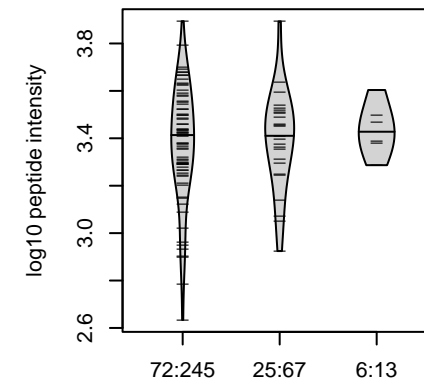

11:68440107:C:T\_T  
p = 0.51, beta = -0.108, N = 103

Assay Target: GAL  
Olink UniProt: P22466  
UKB rsID: rs2012605  
Proxy rsID: rs2012605  
UKB SNP: 11:68440107:C:T  
Proxy SNP: 11:68440107:C:T  
UKB log10(p): 47.9  
UKB BETA: 0.148  
- - - - -  
783:767:639:529:190

**COL6A3 : NP4**  
P12111

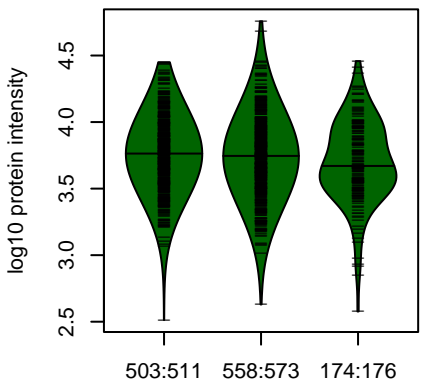

2:238232752:C:A\_C  
 $p = 0.029$ ,  $\beta = -0.0897$ ,  $N = 1235$

**ALNLGYALDYAQR pc2**  
rs111-2;P12111-3;P12111-4;P12111-5 rs111-2;P12111-3;P12111-4;P12111-5

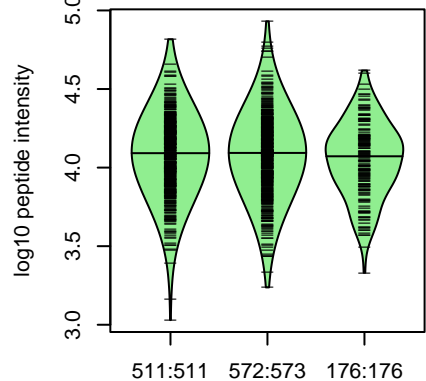

2:238232752:C:A\_C  
 $p = 0.37$ ,  $\beta = -0.0365$ ,  $N = 1259$

**LLVLITGGK pc2**

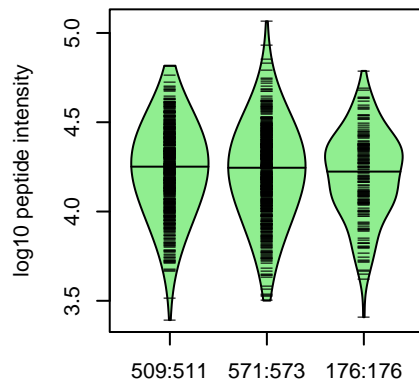

2:238232752:C:A\_C  
 $p = 0.13$ ,  $\beta = -0.0621$ ,  $N = 1256$

**LSDAGITPLFLTR pc2**  
P12111-2;P12111-4;P12111

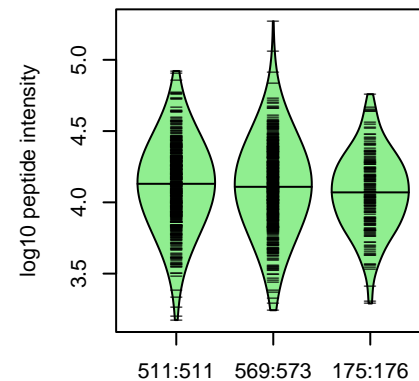

2:238232752:C:A\_C  
 $p = 0.083$ ,  $\beta = -0.0707$ ,  $N = 1255$

**AAPLQGMLPGLLAPLR pc2**  
rs111-2;P12111-3;P12111-4;P12111-5

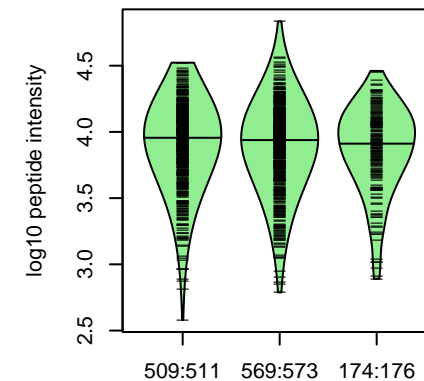

2:238232752:C:A\_C  
 $p = 0.3$ ,  $\beta = -0.042$ ,  $N = 1252$

**COL6A3 : NP4**  
P12111

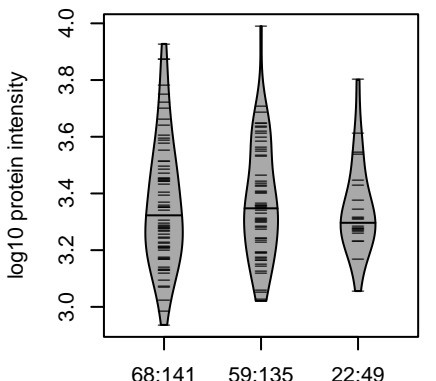

2:238232752:C:A\_C  
 $p = 0.93$ ,  $\beta = 0.00979$ ,  $N = 149$

**ALNLGYALDYAQR pc2**  
rs111-2;P12111-3;P12111-4;P12111-5 rs111-2;P12111-3;P12111-4;P12111-5

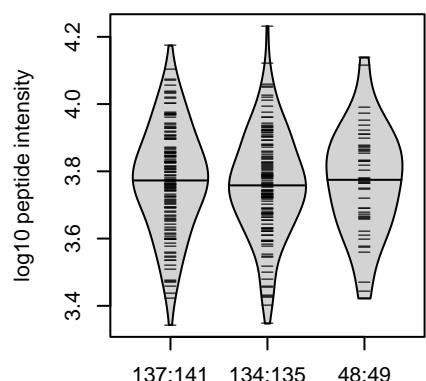

2:238232752:C:A\_C  
 $p = 0.96$ ,  $\beta = 0.00379$ ,  $N = 319$

**AAPLQGMLPGLLAPLR pc2**

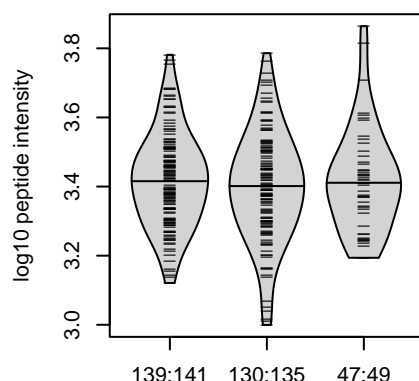

2:238232752:C:A\_C  
 $p = 0.92$ ,  $\beta = 0.00824$ ,  $N = 316$

**VAVVQYSR pc2**

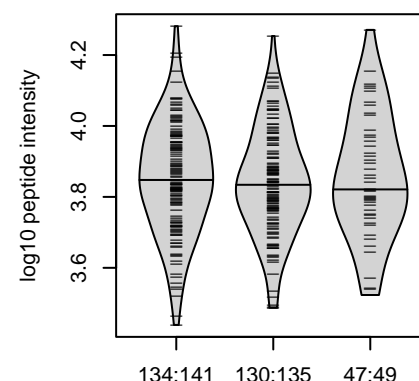

2:238232752:C:A\_C  
 $p = 0.98$ ,  $\beta = 0.00205$ ,  $N = 311$

**VAVIQFSDDPK pc2**

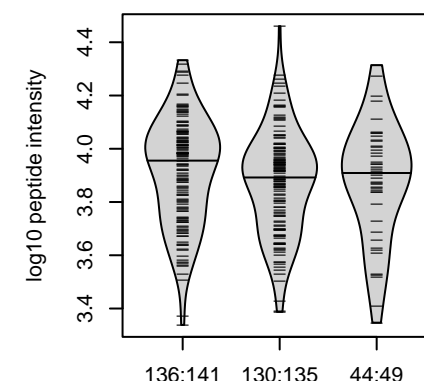

2:238232752:C:A\_C  
 $p = 0.27$ ,  $\beta = -0.0884$ ,  $N = 310$

**AIYHGSFSTK pc2**  
rs1131296 ALT

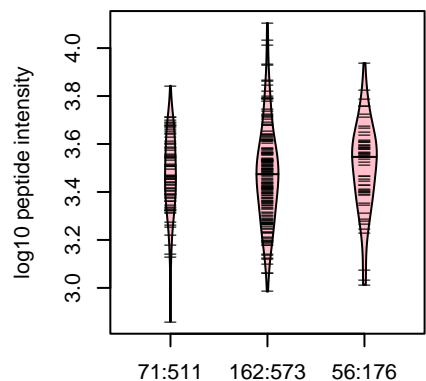

2:238232752:C:A\_C  
 $p = 1.6e-10$ ,  $\text{model} = \text{REC}$ ,  $N = 289$

**ATYHGSFSTK pc2**  
rs1131296 REF

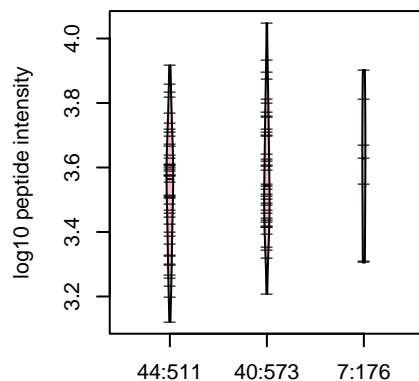

2:238232752:C:A\_C  
 $p = 0.083$ ,  $\text{model} = \text{DOM}$ ,  $N = 91$

**AEPPGPYFYDLTVTSAHDQSLVLK pc2**  
rs2270669 REF

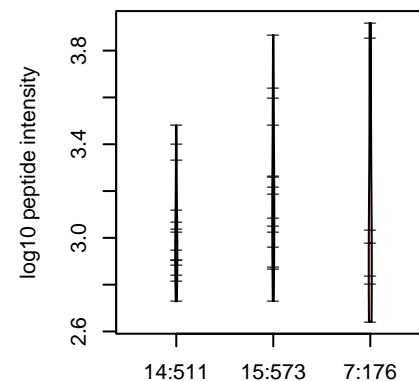

2:238232752:C:A\_C  
 $p = 0.33$ ,  $\text{model} = \text{DOM}$ ,  $N = 36$

Assay Target: COL6A3  
Olink UniProt: P12111  
UKB rsID: rs1050785  
Proxy rsID: rs1050785  
UKB SNP: 2:238232752:C:A  
Proxy SNP: 2:238232752:C:A  
UKB log10(p): 47.7  
UKB BETA: 0.09  
-----  
1259:1256:1255:1252:1252:125



**SERPINE1 : NP5  
P05121**

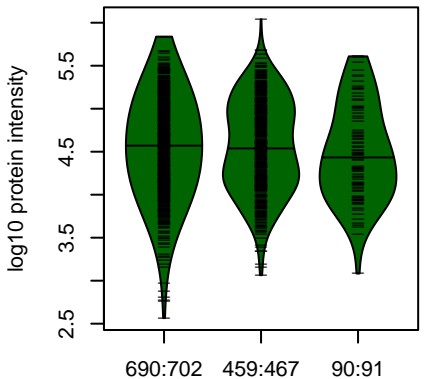

7:100776208:A:G\_G  
p = 0.42, beta = -0.0364, N = 1239

**FIINDWVK pc2  
P05121**

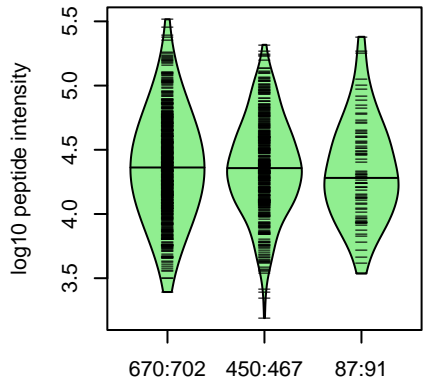

7:100776208:A:G\_G  
p = 0.35, beta = -0.043, N = 1207

**MAPEEIIIDRPFLFVVR pc3  
P05121**

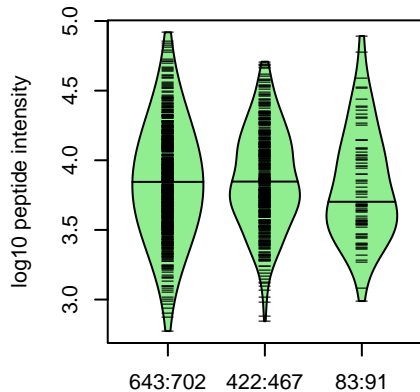

7:100776208:A:G\_G  
p = 0.59, beta = -0.0254, N = 1148

**PLENLGMTDMFR pc2  
P05121**

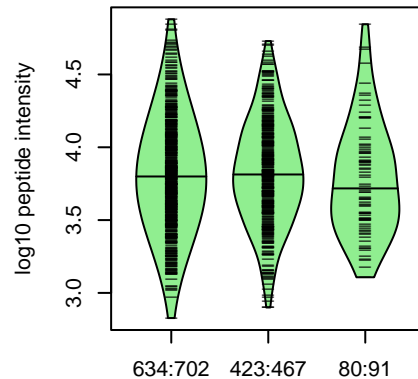

7:100776208:A:G\_G  
p = 0.6, beta = -0.0249, N = 1137

**VFQVQAQASK pc2  
P05121**

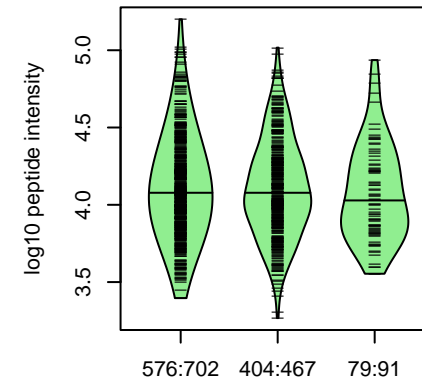

7:100776208:A:G\_G  
p = 0.22, beta = -0.06, N = 1059

**SERPINE1 : NP5  
P05121**

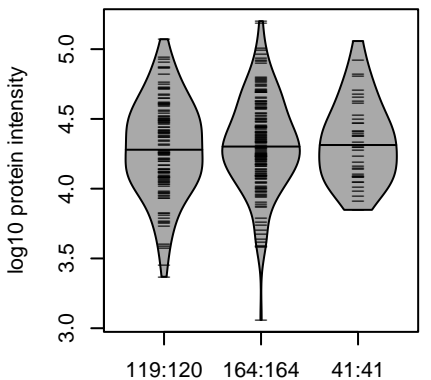

7:100776208:A:G\_G  
p = 0.25, beta = 0.0956, N = 324

**MAPEEIIIDRPFLFVVR pc3  
P05121**

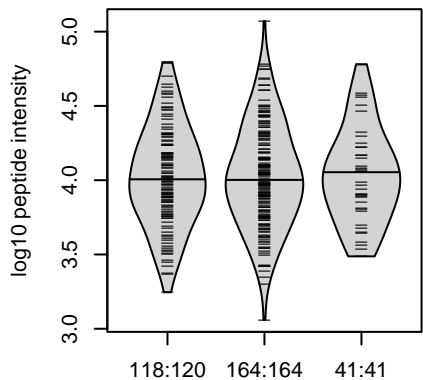

7:100776208:A:G\_G  
p = 0.73, beta = 0.029, N = 323

**PLENLGMTDMFR pc2  
P05121**

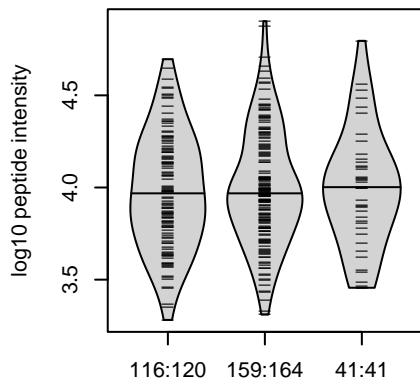

7:100776208:A:G\_G  
p = 0.54, beta = 0.0519, N = 316

**VFQVQAQASK pc2  
P05121**

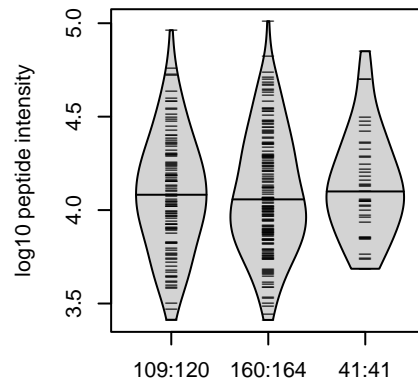

7:100776208:A:G\_G  
p = 0.26, beta = 0.0949, N = 310

**QVDFSEVER pc2  
P05121**

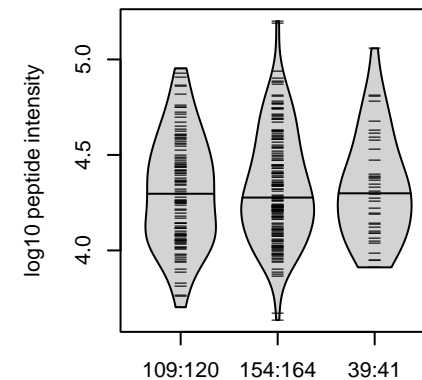

7:100776208:A:G\_G  
p = 0.33, beta = 0.0836, N = 302

Assay Target: SERPINE1  
Olink UniProt: P05121  
UKB rsID: rs2227674  
Proxy rsID: rs2227674  
UKB SNP: 7:100776208:A:G  
Proxy SNP: 7:100776208:A:G  
UKB log10(p): 47.5  
UKB BETA: -0.109  
-----  
1207:1148:1137:1059:1026:102

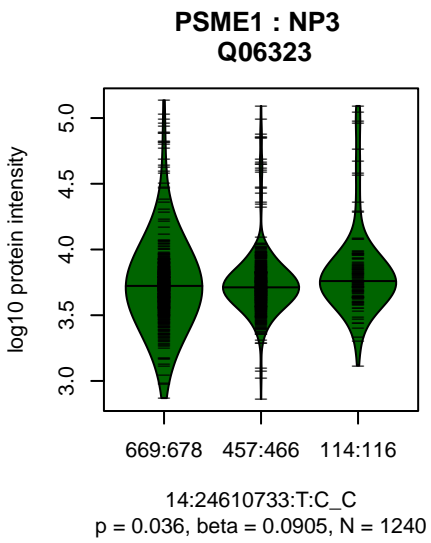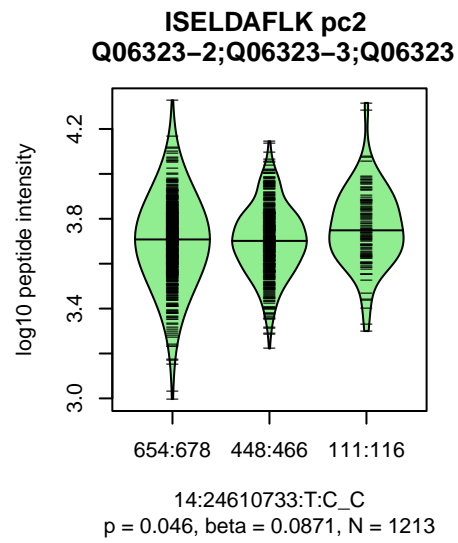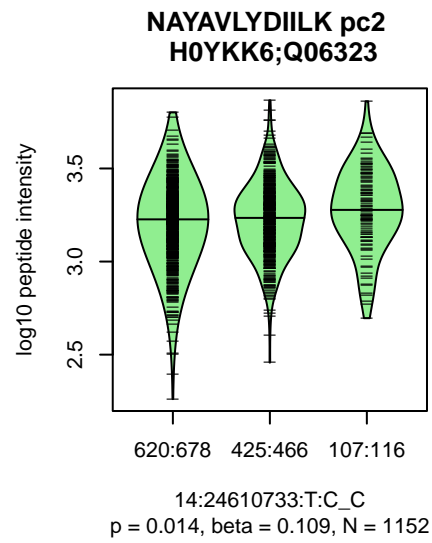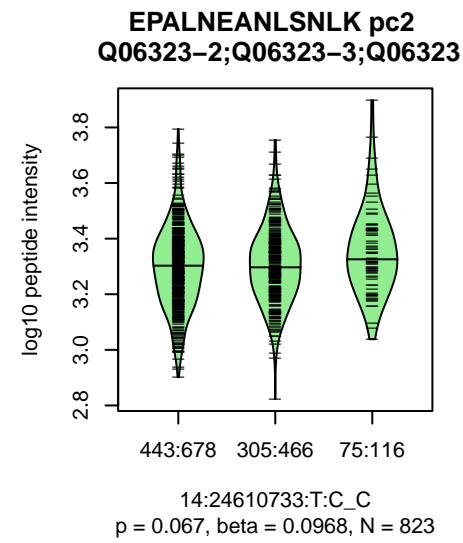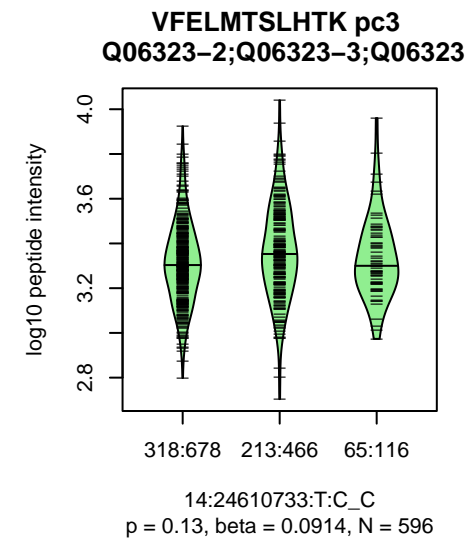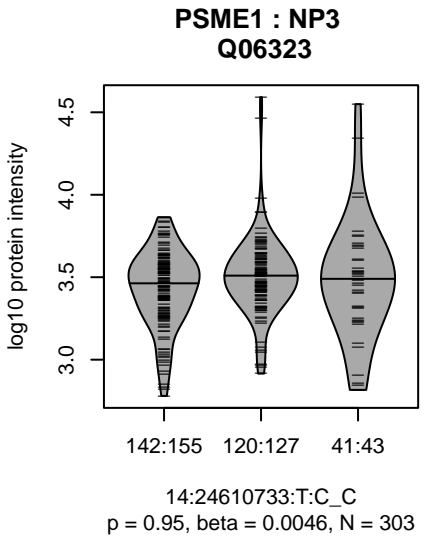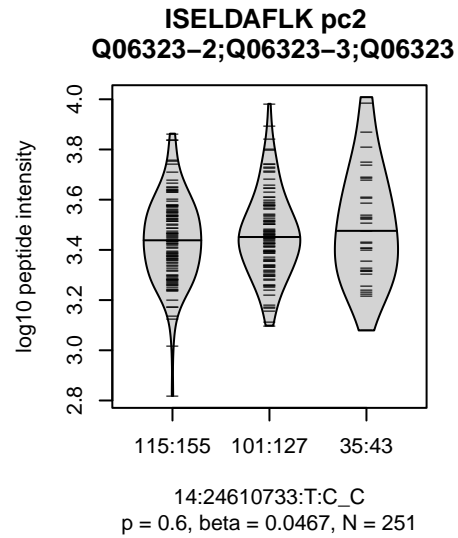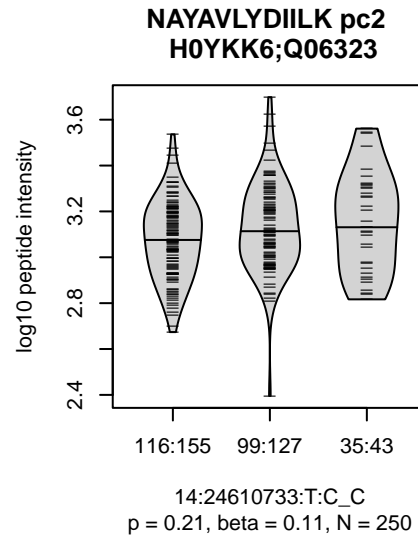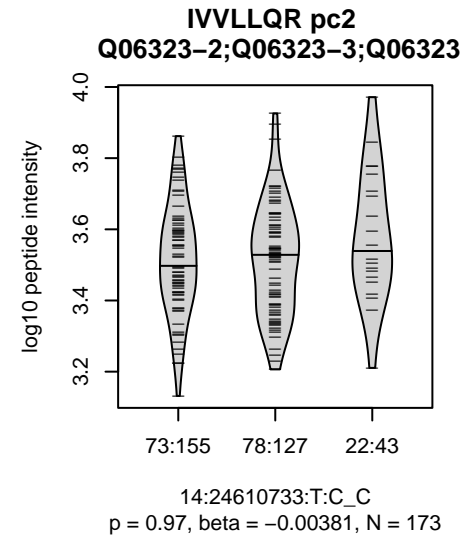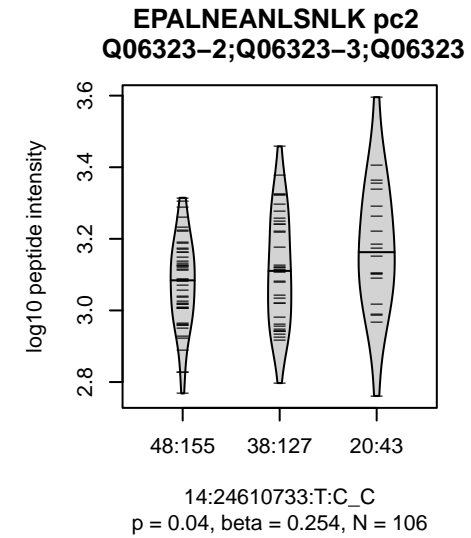

Assay Target: PSME1  
 Olink UniProt: Q06323  
 UKB rsID: rs2236352  
 Proxy rsID: rs2236352  
 UKB SNP: 14:24610733:T:C  
 Proxy SNP: 14:24610733:T:C  
 UKB log10(p): 47.5  
 UKB BETA: 0.1  
 - - - - - \* - - - - - : - - - - - NA  
 1213:1152:823:596:552:510:502



**TRIM25 : NP1**  
**Q14258**

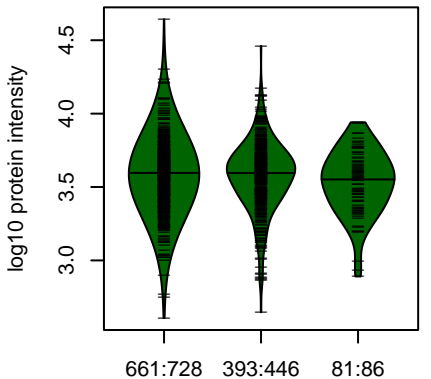

17:54978794:G:A\_G  
p = 0.33, beta = -0.0461, N = 1135

**ALLDASETSTR pc2**  
**A0A3B3IUA7;Q14258**

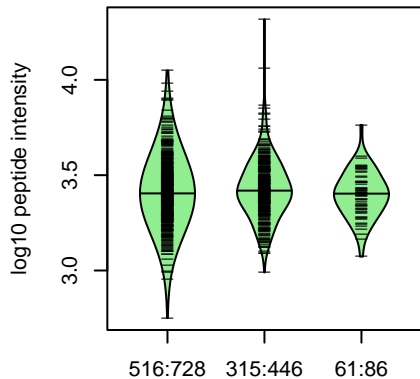

17:54978794:G:A\_G  
p = 0.94, beta = 0.00422, N = 892

**VLETFLAK pc2**  
**A0A3B3IUA7;Q14258**

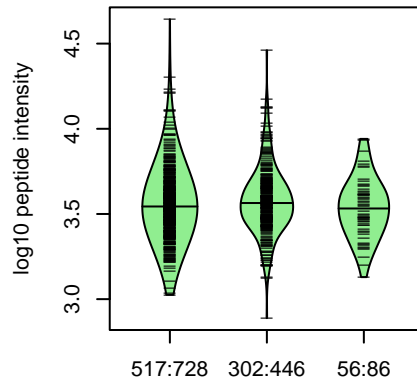

17:54978794:G:A\_G  
p = 0.56, beta = 0.0321, N = 875

**LTVMYSQINGASR pc2**  
**A0A3B3IUA7;Q14258**

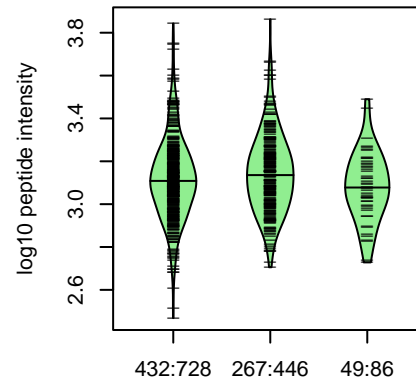

17:54978794:G:A\_G  
p = 0.85, beta = 0.0112, N = 748

**VALSECYTVASVAEMPQNYRPHPQR**  
**Q14258**

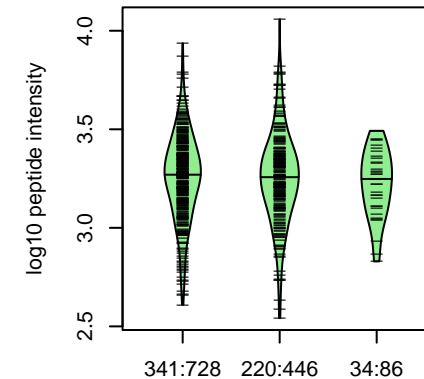

17:54978794:G:A\_G  
p = 0.53, beta = -0.0419, N = 595

**TRIM25 : NP1**  
**Q14258**

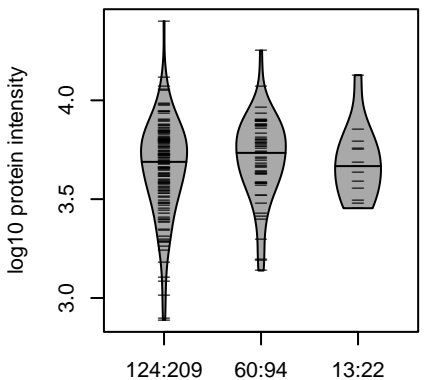

17:54978794:G:A\_G  
p = 0.93, beta = 0.00959, N = 197

**VLETFLAK pc2**  
**A0A3B3IUA7;Q14258**

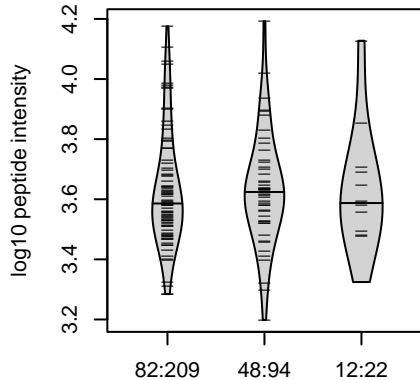

17:54978794:G:A\_G  
p = 0.78, beta = 0.0355, N = 142

**PVYIPEVELNHK pc3**  
**A0A3B3IUA7;Q14258**

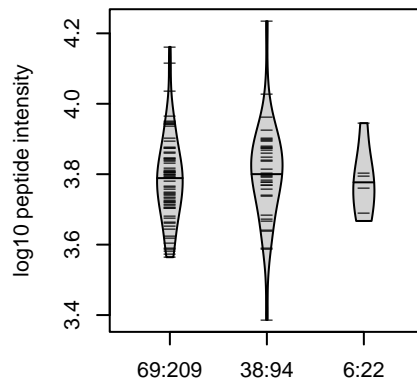

17:54978794:G:A\_G  
p = 0.91, beta = 0.0167, N = 113

**ALLDASETSTR pc2**  
**A0A3B3IUA7;Q14258**

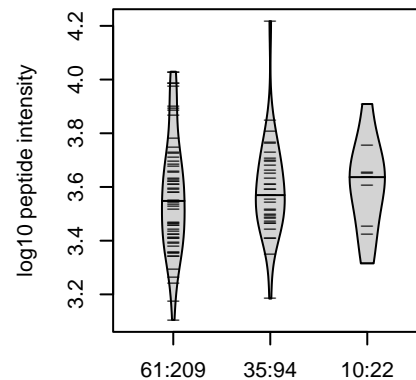

17:54978794:G:A\_G  
p = 0.33, beta = 0.138, N = 106

**EEIEQSLTK pc2**  
**A0A3B3IUA7;Q14258**

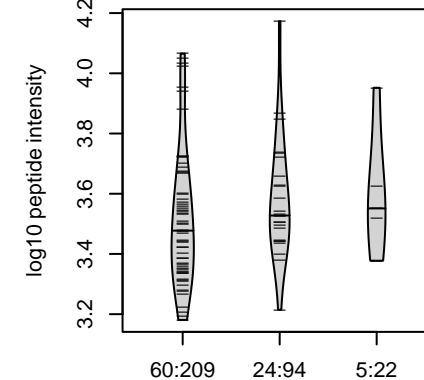

17:54978794:G:A\_G  
p = 0.094, beta = 0.29, N = 89

**LQELTPSSGDPGEHDPASTHK pc4**  
**rs205498 ALT**

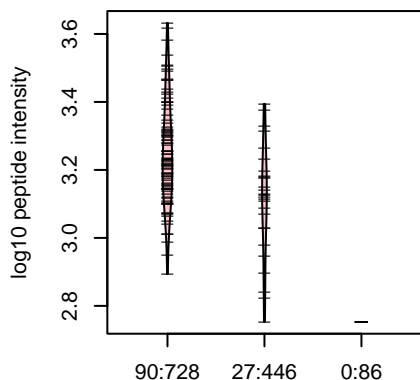

17:54978794:G:A\_G  
p = 7.8e-06, model = REC, N = 117

Assay Target: TRIM25  
Olink UniProt: Q14258  
UKB rsID: rs205498  
Proxy rsID: rs205498  
UKB SNP: 17:54978794:G:A  
Proxy SNP: 17:54978794:G:A  
UKB log10(p): 45.8  
UKB BETA: -0.097  
-----  
892:875:748:595:580:563:460:3

**LTA4H : NP5  
P09960**

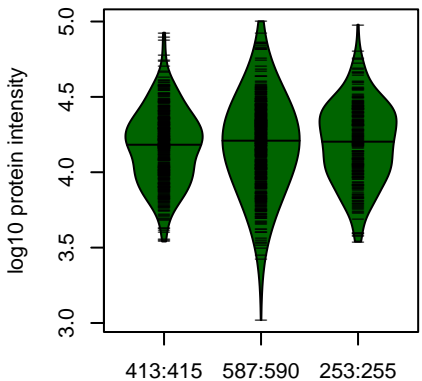

12:96423782:T:C\_C  
 $p = 0.32$ ,  $\beta = 0.0388$ ,  $N = 1253$

**DLSSHQLNEFLAQLQR pc3  
P09960-3;P09960-4;P09960**

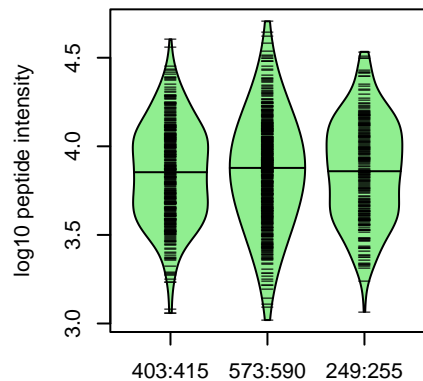

12:96423782:T:C\_C  
 $p = 0.61$ ,  $\beta = 0.02$ ,  $N = 1225$

**GSPMEISLPIALSK pc2  
P09960-3;P09960-4;P09960**

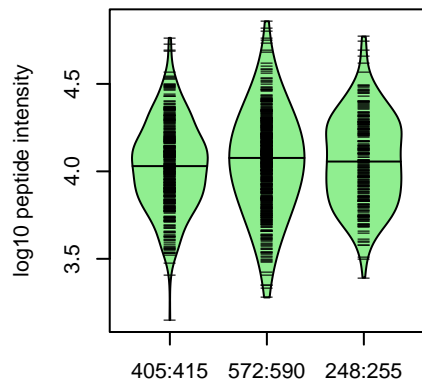

12:96423782:T:C\_C  
 $p = 0.16$ ,  $\beta = 0.0553$ ,  $N = 1225$

**SSALQWLTPEQTSGK pc2  
P09960-3;P09960-4;P09960**

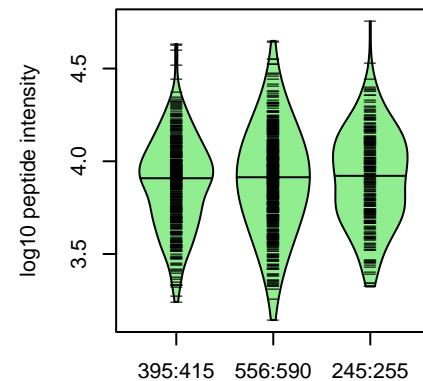

12:96423782:T:C\_C  
 $p = 0.19$ ,  $\beta = 0.0528$ ,  $N = 1196$

**SAYEFSETESMLK pc2  
P09960-3;P09960-4;P09960**

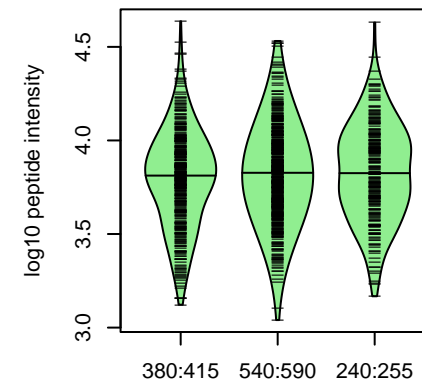

12:96423782:T:C\_C  
 $p = 0.094$ ,  $\beta = 0.0678$ ,  $N = 1160$

**LTA4H : NP5  
P09960**

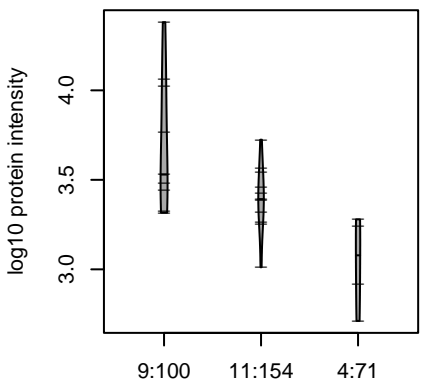

12:96423782:T:C\_C  
 $p = 0.11$ ,  $\beta = -0.419$ ,  $N = 24$

Assay Target: LTA4H  
Olink UniProt: P09960  
UKB rsID: rs2660896  
Proxy rsID: rs2660896  
UKB SNP: 12:96423782:T:C  
Proxy SNP: 12:96423782:T:C  
UKB log10(p): 45.7  
UKB BETA: 0.087  
-----  
1225:1225:1196:1160:1067:104

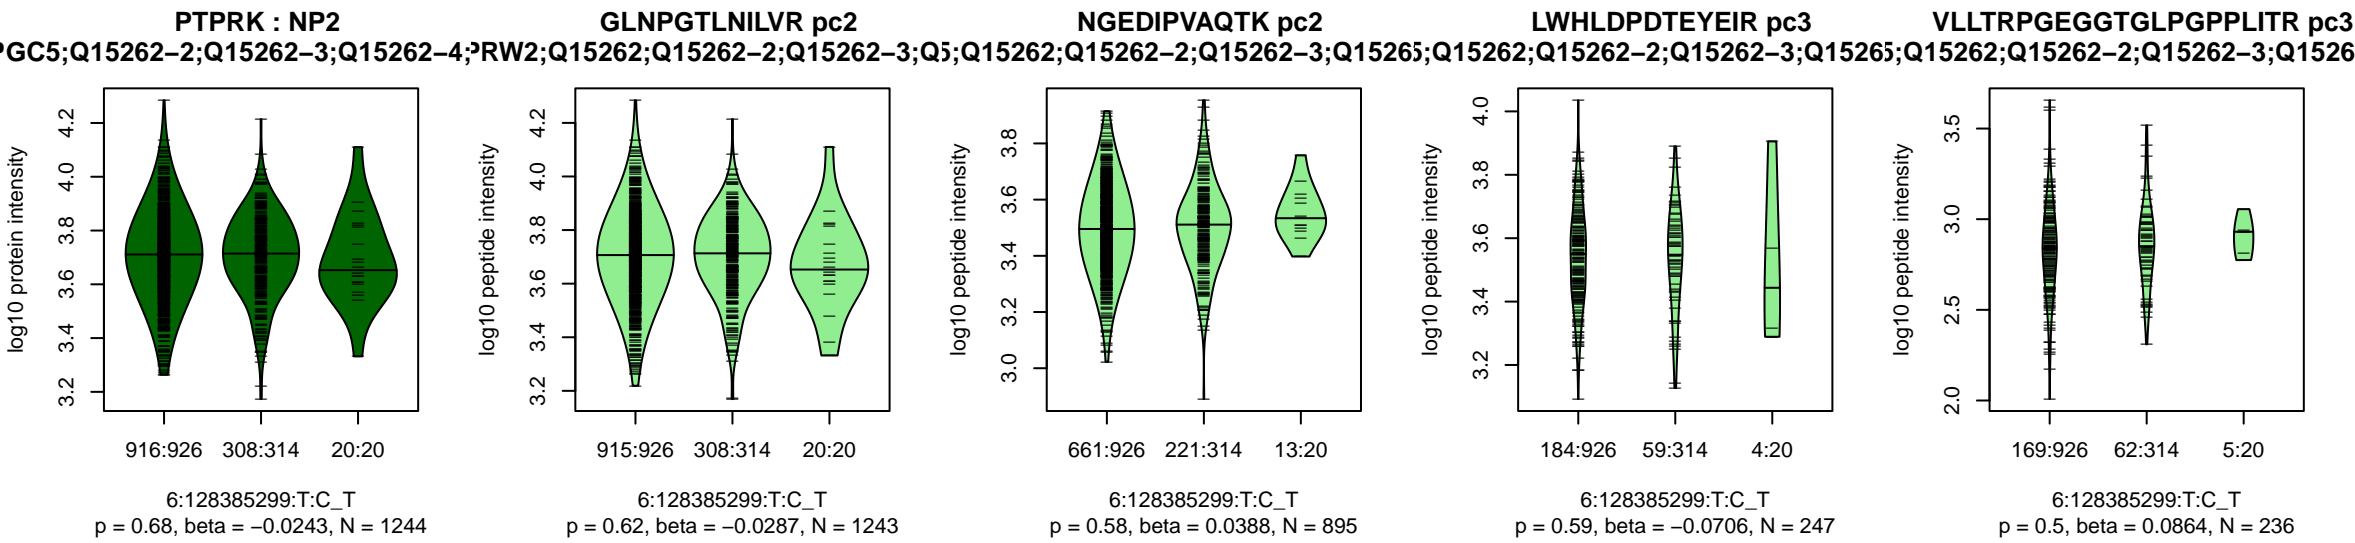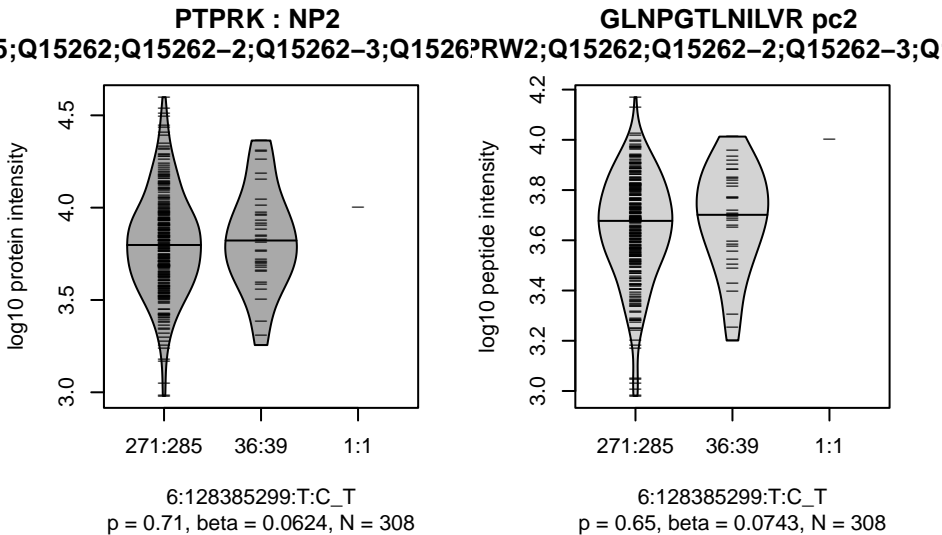

Assay Target: PTPRK  
 Olink UniProt: Q15262  
 UKB rsID: rs11422080  
 Proxy rsID: rs7769691  
 UKB SNP: 6:128383562:G:GA  
 Proxy SNP: 6:128385299:T:C  
 UKB log10(p): 44.7  
 UKB BETA: -0.12  
 ---:---  
 1243:895:247:236

**SERPINB1 : NP1  
P30740**

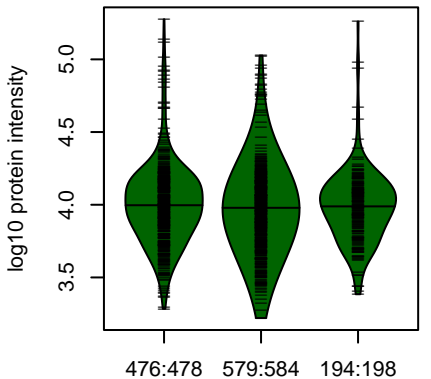

6:2835831:A:G\_A  
p = 0.27, beta = -0.0448, N = 1249

**LVLVNAIFYK pc2  
0GU38;O75830;P50452-2;P30740;P50**

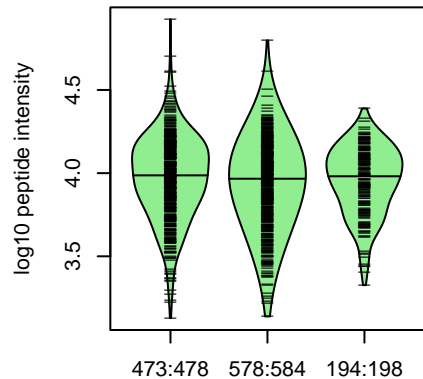

6:2835831:A:G\_A  
p = 0.12, beta = -0.063, N = 1245

**FAYGYIEDLK pc2  
P30740**

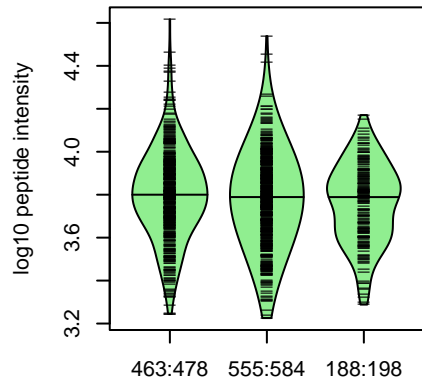

6:2835831:A:G\_A  
p = 0.027, beta = -0.0906, N = 1206

**TYNFLPEFLVSTQK pc2  
P30740**

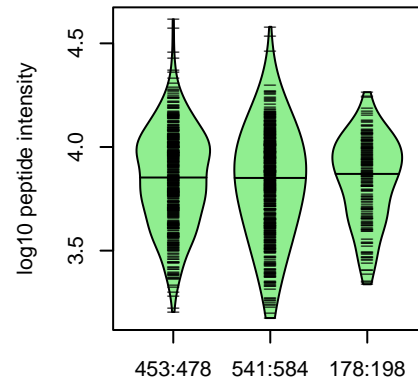

6:2835831:A:G\_A  
p = 0.44, beta = -0.0326, N = 1172

**LHEWTKPENLDFIEVNVSLPR pc4  
P30740**

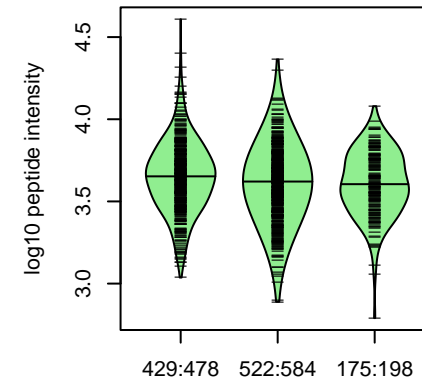

6:2835831:A:G\_A  
p = 0.01, beta = -0.109, N = 1126

**SERPINB1 : NP1  
P30740**

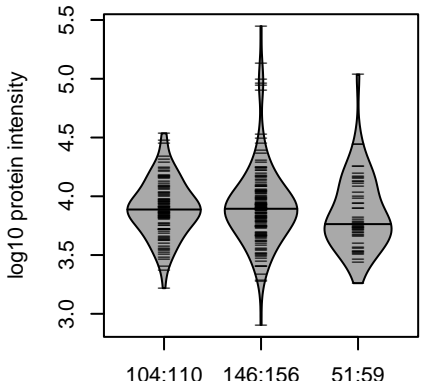

6:2835831:A:G\_A  
p = 0.3, beta = -0.0851, N = 301

**FAYGYIEDLK pc2  
P30740**

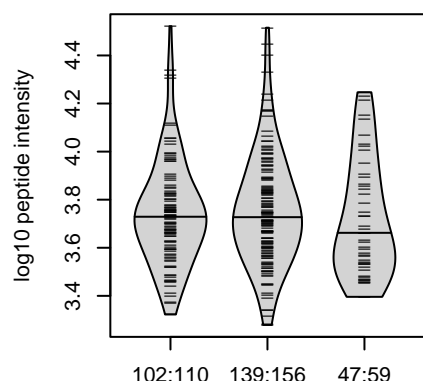

6:2835831:A:G\_A  
p = 0.64, beta = -0.0391, N = 288

**LVLVNAIFYK pc2  
0GU38;O75830;P50452-2;P30740;P50**

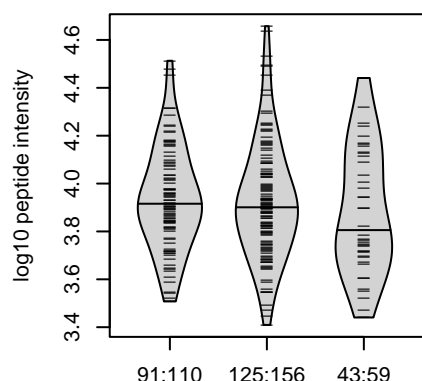

6:2835831:A:G\_A  
p = 0.18, beta = -0.118, N = 259

**LHEWTKPENLDFIEVNVSLPR pc4  
P30740**

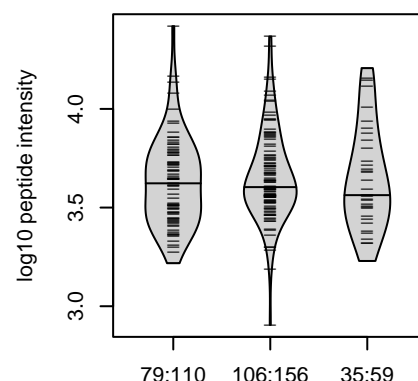

6:2835831:A:G\_A  
p = 0.48, beta = 0.068, N = 220

**EATTNAPFR pc2  
P30740**

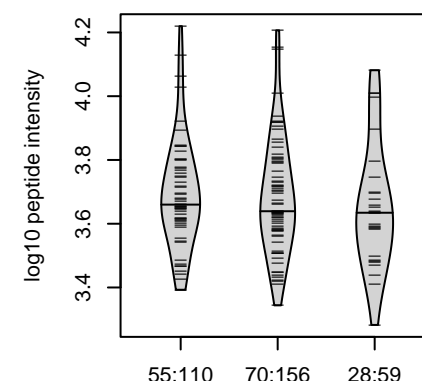

6:2835831:A:G\_A  
p = 0.24, beta = -0.13, N = 153

Assay Target: SERPINB1  
Olink UniProt: P30740  
UKB rsID: rs2293772  
Proxy rsID: rs2293772  
UKB SNP: 6:2835831:A:G  
Proxy SNP: 6:2835831:A:G  
UKB log10(p): 44.7  
UKB BETA: 0.088  
-----  
1245:1206:1172:1126:892:822:7

**PDIA4 : NP2**  
**P13667**

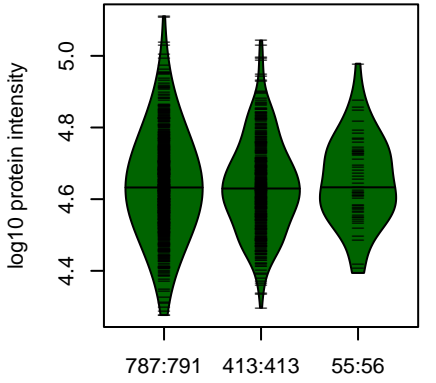

7:148727168:G:T\_T  
 $p = 0.87$ ,  $\beta = -0.00826$ ,  $N = 1255$

**IDATSASVLASR pc2**  
**A0A499FI48;P13667**

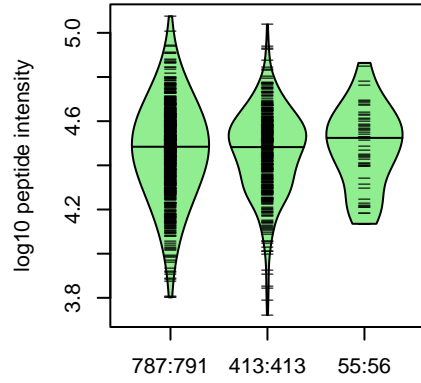

7:148727168:G:T\_T  
 $p = 0.73$ ,  $\beta = 0.0168$ ,  $N = 1255$

**QLEPVYNSLAK pc2**  
**A0A499FI48;P13667**

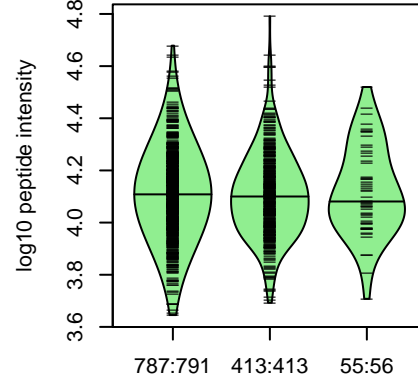

7:148727168:G:T\_T  
 $p = 0.84$ ,  $\beta = -0.00976$ ,  $N = 1255$

**VSQQLVVMQPEK pc2**  
**A0A499FI48;P13667**

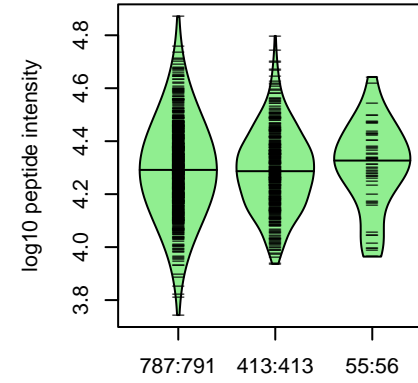

7:148727168:G:T\_T  
 $p = 0.64$ ,  $\beta = -0.0229$ ,  $N = 1255$

**VEGFPTIYFAPSGDK pc2**  
**A0A499FI48;P13667**

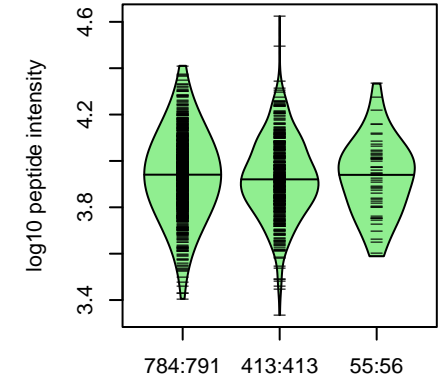

7:148727168:G:T\_T  
 $p = 0.12$ ,  $\beta = -0.076$ ,  $N = 1252$

**PDIA4 : NP2**  
**P13667**

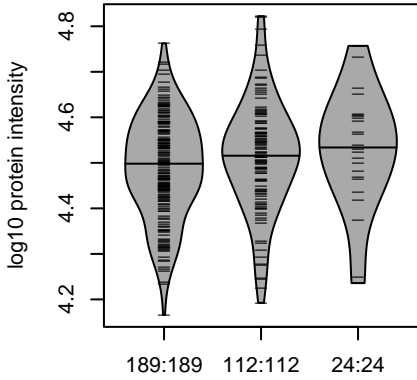

7:148727168:G:T\_T  
 $p = 0.82$ ,  $\beta = 0.02$ ,  $N = 325$

**DKDPPIPVAK pc2**  
**A0A499FI48;P13667**

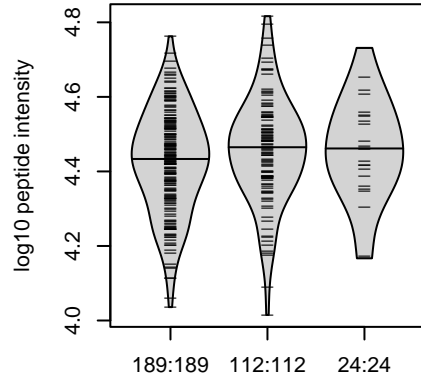

7:148727168:G:T\_T  
 $p = 0.84$ ,  $\beta = 0.0179$ ,  $N = 325$

**DLGLSESGEDVNAAILDESGKK pc:**  
**A0A499FI48;P13667**

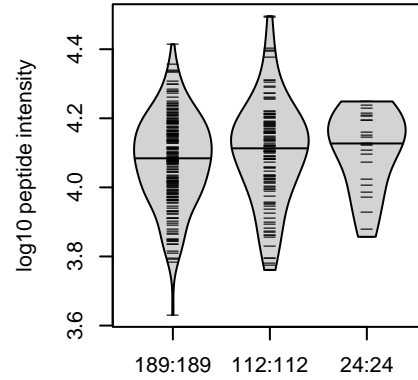

7:148727168:G:T\_T  
 $p = 0.64$ ,  $\beta = -0.0411$ ,  $N = 325$

**FEGGDRDLEHLSK pc3**  
**A0A499FI48;P13667**

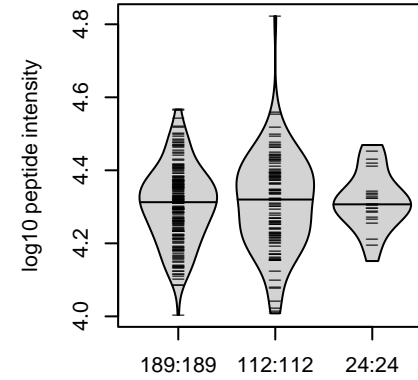

7:148727168:G:T\_T  
 $p = 0.47$ ,  $\beta = -0.063$ ,  $N = 325$

**QFAPEYEK pc2**  
**A0A499FI48;P13667**

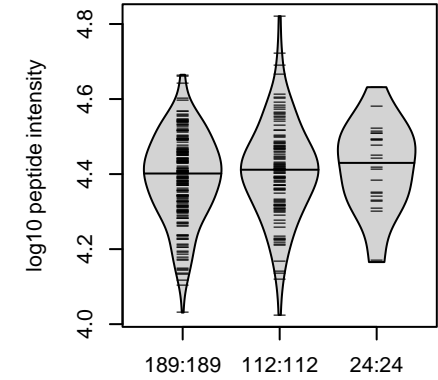

7:148727168:G:T\_T  
 $p = 0.58$ ,  $\beta = -0.0483$ ,  $N = 325$

Assay Target: PDIA4  
Olink UniProt: P13667  
UKB rsID: rs11974627  
Proxy rsID: rs11974627  
UKB SNP: 7:148727168:G:T  
Proxy SNP: 7:148727168:G:T  
UKB log10(p): 44.1  
UKB BETA: -0.108  
-----  
1255:1255:1255:1252:1246:124



**VCAM1 : NP4  
P19320**

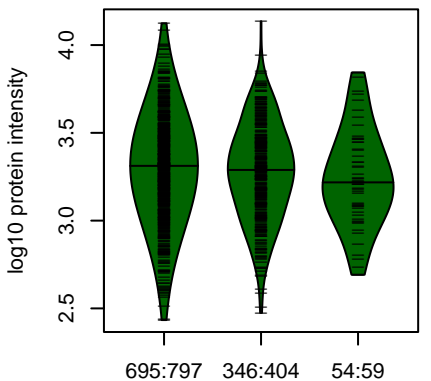

1:101181342:T:C\_C  
p = 0.06, beta = -0.0968, N = 1095

**QSTQTLVNVAPR pc2  
P19320;P19320-2;P19320-3**

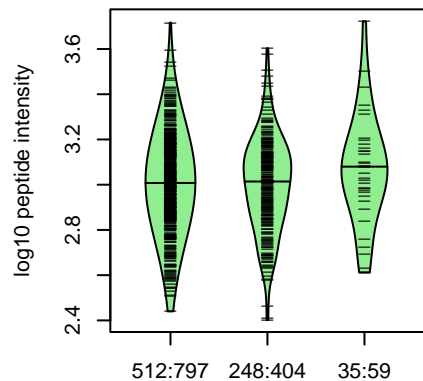

1:101181342:T:C\_C  
p = 0.67, beta = 0.0259, N = 795

**VPSVYPLDRLEIELLK pc3  
P19320;P19320-2;P19320-3**

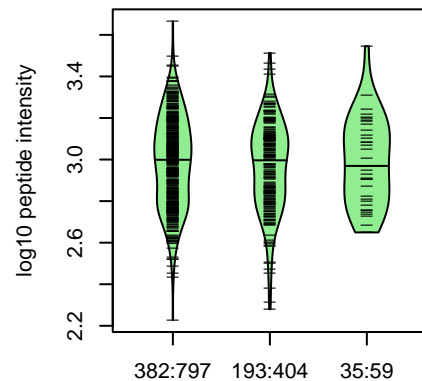

1:101181342:T:C\_C  
p = 0.38, beta = -0.0594, N = 610

**PFTVEISPGPR pc2  
P19320;P19320-3**

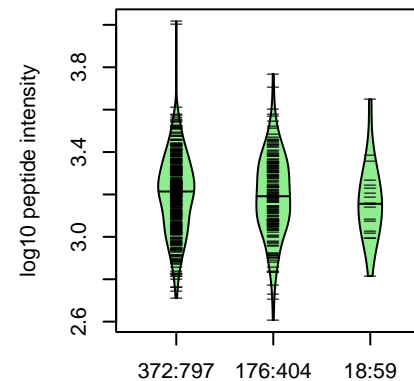

1:101181342:T:C\_C  
p = 0.4, beta = -0.0639, N = 566

**EVELIIQVTPK pc2  
E9PDD2;P19320;P19320-2;P19320-3**

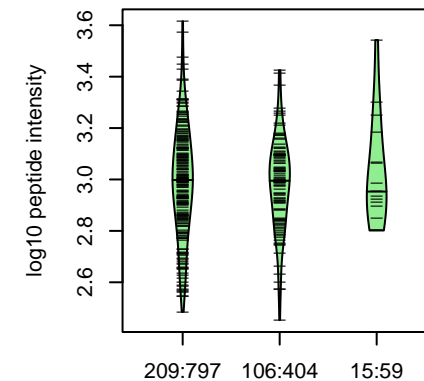

1:101181342:T:C\_C  
p = 0.68, beta = -0.0385, N = 330

**VCAM1 : NP4  
P19320**

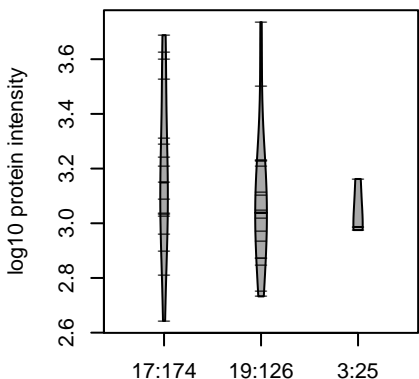

1:101181342:T:C\_C  
p = 0.58, beta = -0.134, N = 39

**QSTQTLVNVAPR pc2  
P19320;P19320-2;P19320-3**

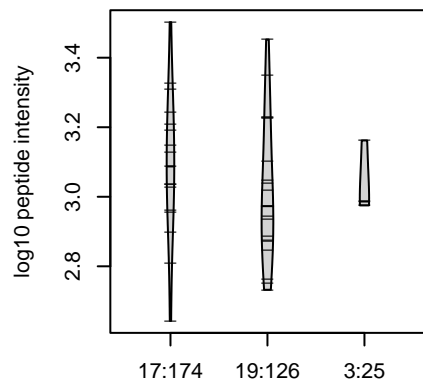

1:101181342:T:C\_C  
p = 0.59, beta = -0.133, N = 39

Assay Target: VCAM1  
Olink UniProt: P19320  
UKB rsID: rs12240047  
Proxy rsID: rs12240047  
UKB SNP: 1:101181342:T:C  
Proxy SNP: 1:101181342:T:C  
UKB log10(p): 42.7  
UKB BETA: -0.102  
-----  
795:610:566:330:269:215:203:1

**CA1 : NP1  
P00915**

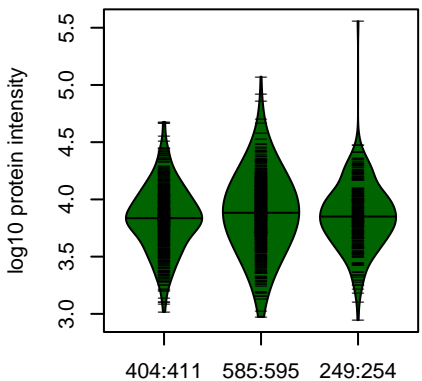

8:86268192:G:T\_G  
p = 0.36, beta = 0.0365, N = 1238

**ADGLAVIGVLMK pc2  
E5RG81;P00915**

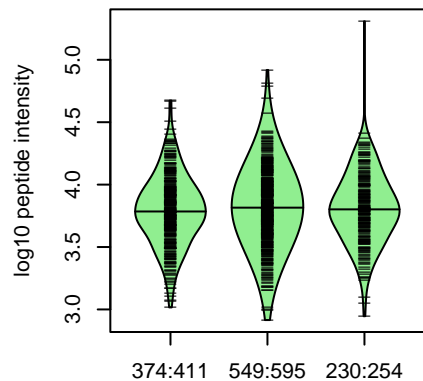

8:86268192:G:T\_G  
p = 0.61, beta = 0.0208, N = 1153

**YSSLAEAASK pc2  
E5RG81;P00915**

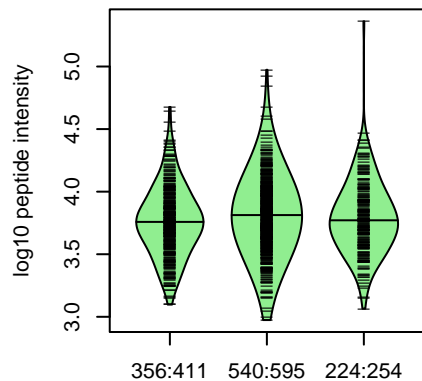

8:86268192:G:T\_G  
p = 0.16, beta = 0.0586, N = 1120

**VLDALQAIK pc2  
P00915**

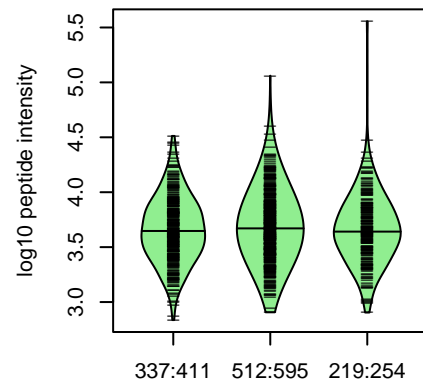

8:86268192:G:T\_G  
p = 0.77, beta = -0.0128, N = 1068

**SLLSNVEGDNAVPMQHNRRPTQPLK  
E5RG81;P00915**

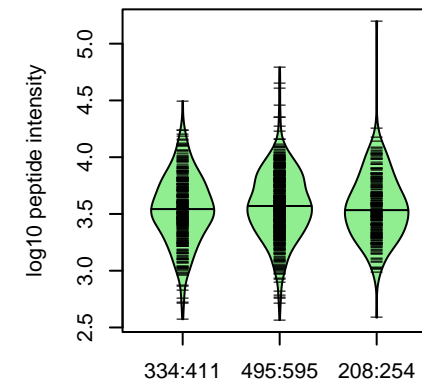

8:86268192:G:T\_G  
p = 0.42, beta = 0.0349, N = 1037

**CA1 : NP1  
P00915**

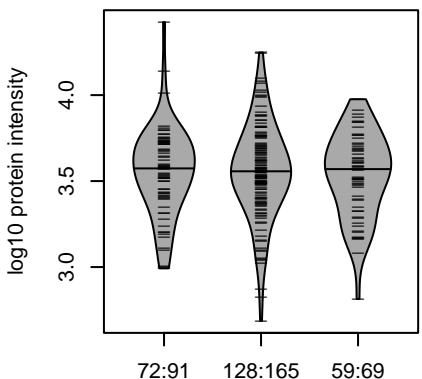

8:86268192:G:T\_G  
p = 0.78, beta = 0.0238, N = 259

**ADGLAVIGVLMK pc2  
E5RG81;P00915**

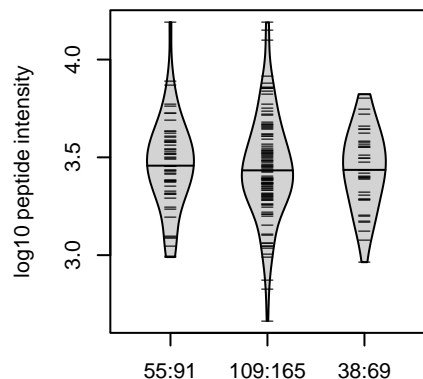

8:86268192:G:T\_G  
p = 0.93, beta = 0.00942, N = 202

**VLDALQAIK pc2  
P00915**

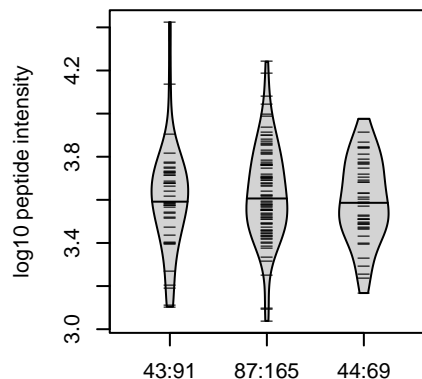

8:86268192:G:T\_G  
p = 0.77, beta = 0.0302, N = 174

**ESISVSSEQLAQFR pc2  
E5RG81;P00915**

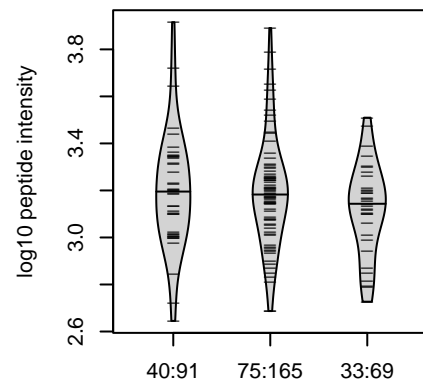

8:86268192:G:T\_G  
p = 0.26, beta = -0.128, N = 148

**YSSLAEAASK pc2  
E5RG81;P00915**

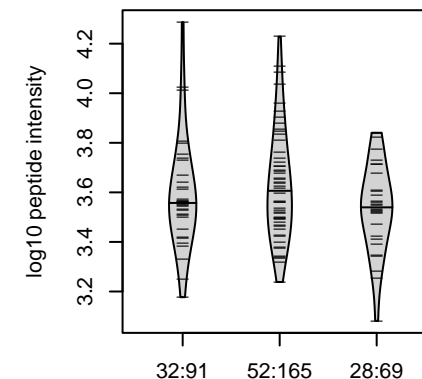

8:86268192:G:T\_G  
p = 0.54, beta = -0.0766, N = 112

Assay Target: CA1  
Olink UniProt: P00915  
UKB rsID: rs1532424  
Proxy rsID: rs1532424  
UKB SNP: 8:86268192:G:T  
Proxy SNP: 8:86268192:G:T  
UKB log10(p): 41.7  
UKB BETA: -0.081  
-----NA:NA:NA  
1153:1120:1068:1037:927:894:8

**ALDH1A1 : NP5  
P00352**

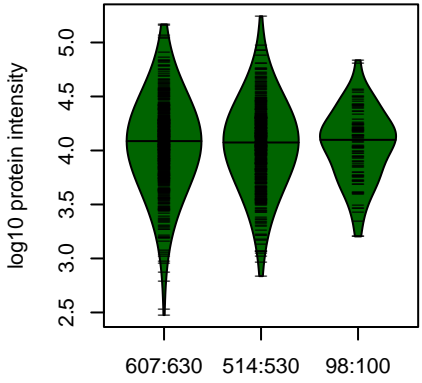

9:75547612:T:C\_C  
p = 0.58, beta = -0.0251, N = 1219

**QAFQIGSPWR pc2  
Q5SYQ9;P00352**

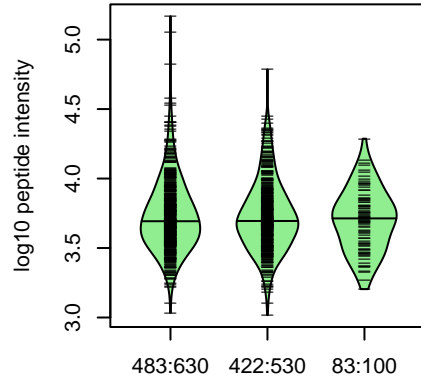

9:75547612:T:C\_C  
p = 0.33, beta = -0.048, N = 988

**LLLATMESMNGGK pc2  
Q5SYQ9;P00352**

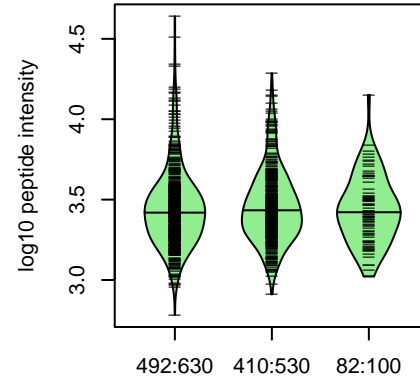

9:75547612:T:C\_C  
p = 0.89, beta = -0.00684, N = 984

**TIPIDGNFFTYTR pc2  
Q5SYQ9;P00352**

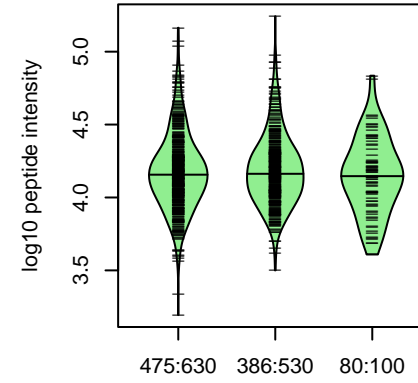

9:75547612:T:C\_C  
p = 0.5, beta = -0.0337, N = 941

**IFINNEWHDSVSGK pc3  
Q5SYQ9;P00352**

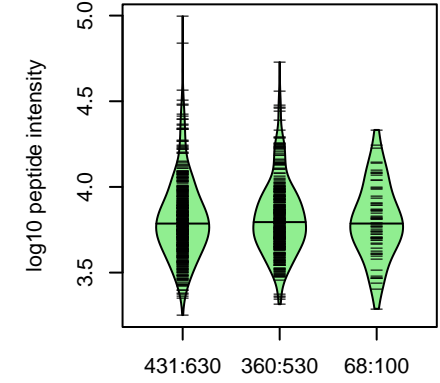

9:75547612:T:C\_C  
p = 0.86, beta = -0.00926, N = 859

**ALDH1A1 : NP5  
P00352**

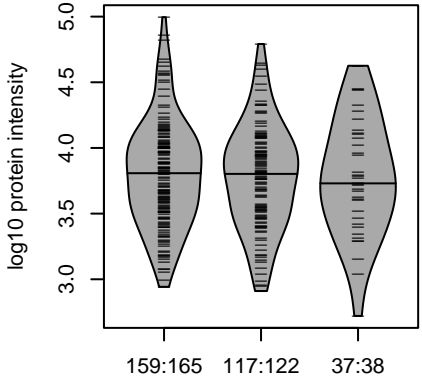

9:75547612:T:C\_C  
p = 0.4, beta = -0.0676, N = 313

**LYSNAYLNDLAGCIK pc2  
Q5SYQ9;P00352**

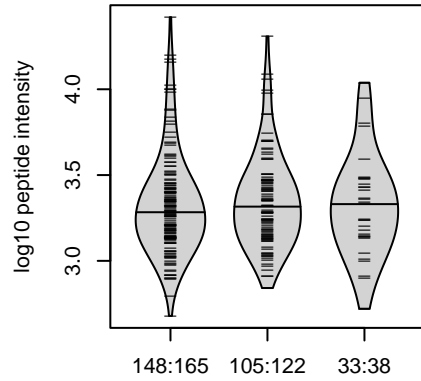

9:75547612:T:C\_C  
p = 0.94, beta = 0.00621, N = 286

**GYFVQPTVFSNVTDEM R pc2  
P00352**

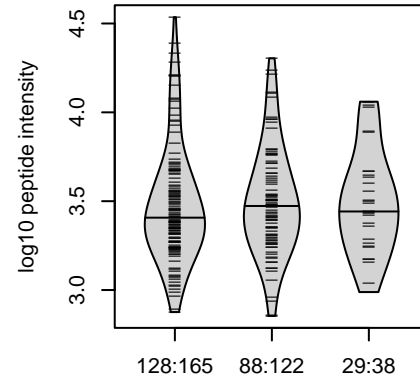

9:75547612:T:C\_C  
p = 0.79, beta = 0.0245, N = 245

**EEIFGPVQQIMK pc2  
P00352**

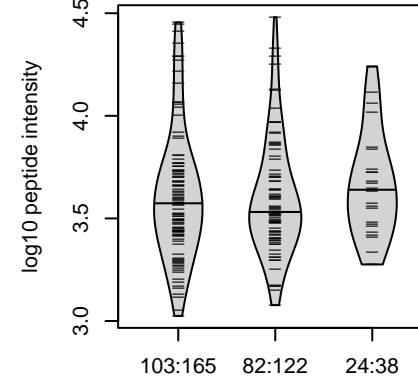

9:75547612:T:C\_C  
p = 0.47, beta = 0.0725, N = 209

**QAFQIGSPWR pc2  
Q5SYQ9;P00352**

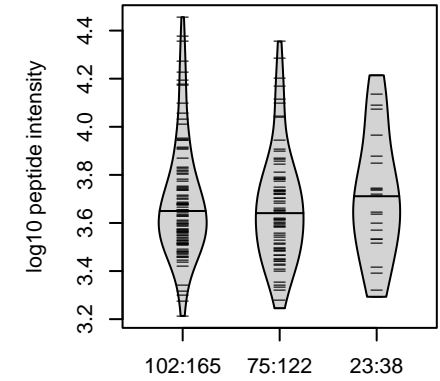

9:75547612:T:C\_C  
p = 0.76, beta = -0.0309, N = 200

Assay Target: ALDH1A1  
Olink UniProt: P00352  
UKB rsID: rs348463  
Proxy rsID: rs348463  
UKB SNP: 9:75547612:T:C  
Proxy SNP: 9:75547612:T:C  
UKB log10(p): 41.4  
UKB BETA: 0.089  
-----  
988:984:941:859:833:830:793:7

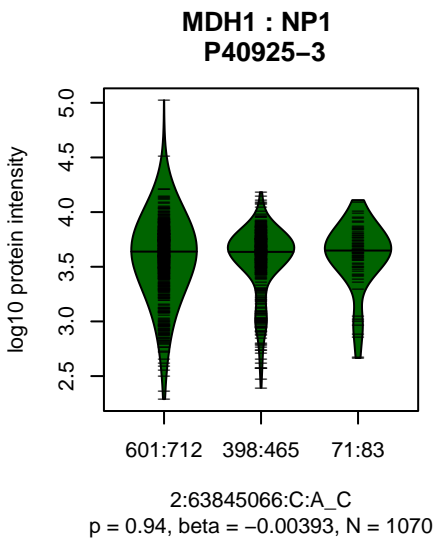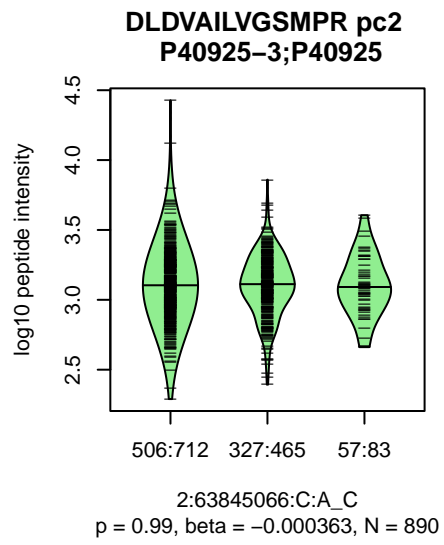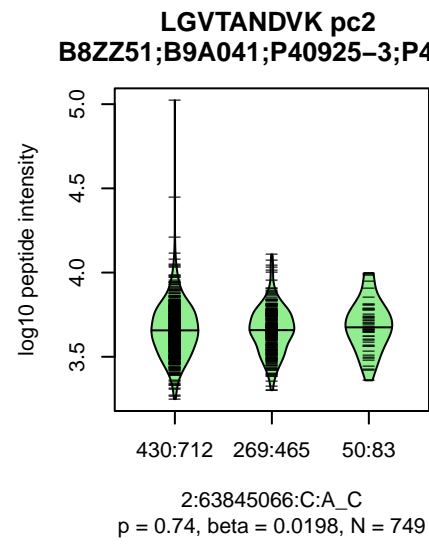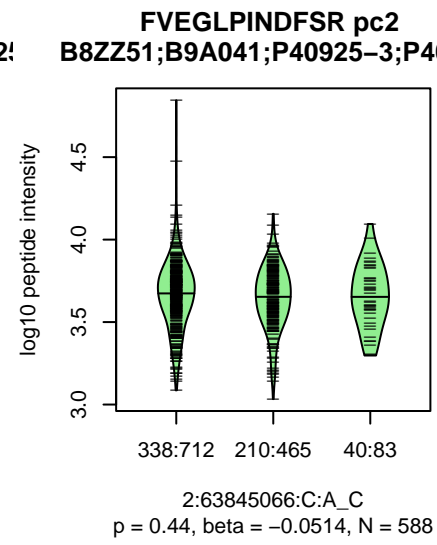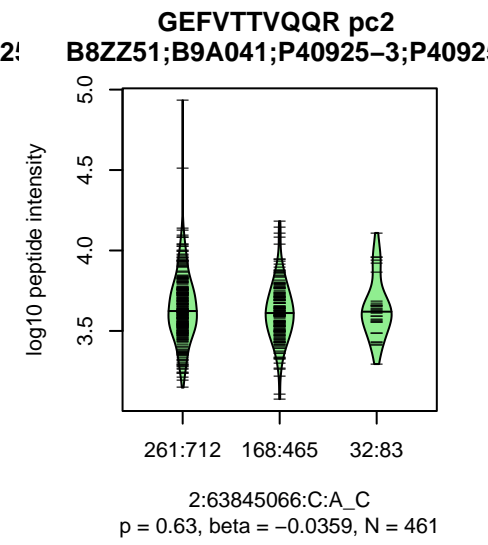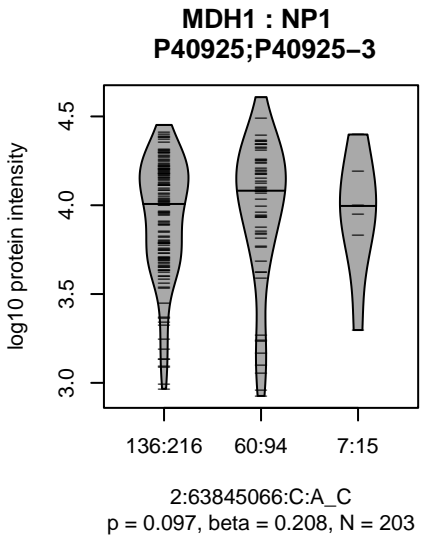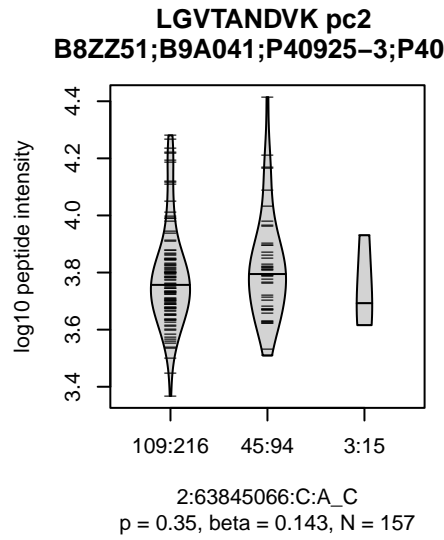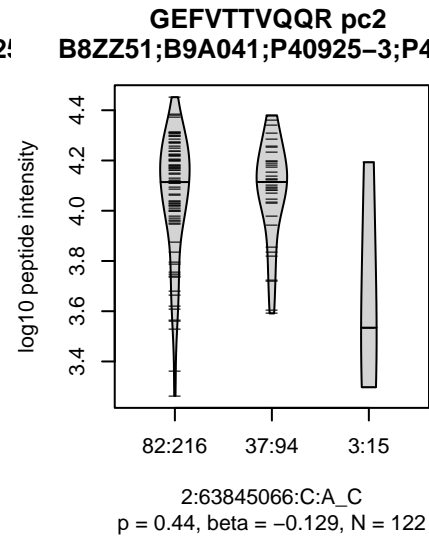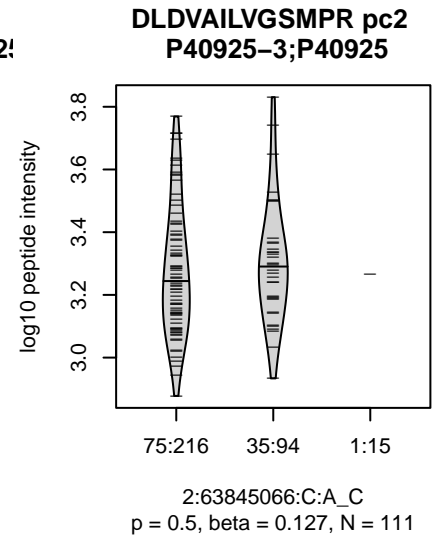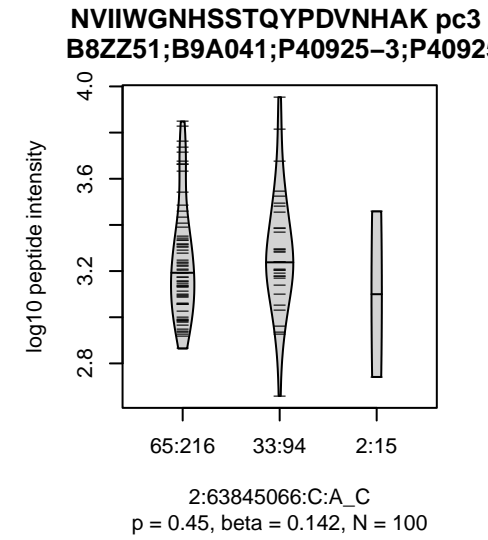

Assay Target: MDH1  
 Olink UniProt: P40925  
 UKB rsID: rs262493  
 Proxy rsID: rs262493  
 UKB SNP: 2:63845066:C:A  
 Proxy SNP: 2:63845066:C:A  
 UKB log10(p): 41.3  
 UKB BETA: -0.092  
 - - - - -  
 890:749:588:461:411:152:111

**CARHSP1 : NP3  
Q9Y2V2**

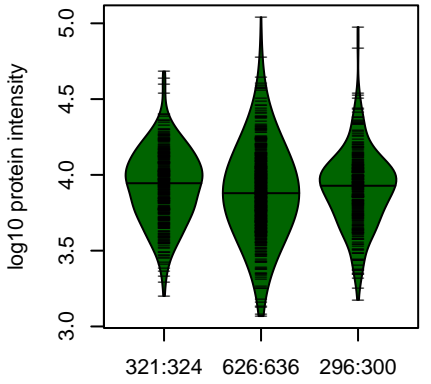

16:8903589:G:T\_T  
p = 0.22, beta = -0.0495, N = 1243

**LQAVEVVITHLAPGTK pc3  
Q9Y2V2**

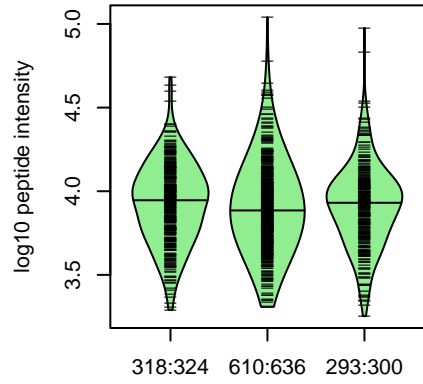

16:8903589:G:T\_T  
p = 0.35, beta = -0.0377, N = 1221

**HETWSGHVISS pc2  
Q9Y2V2**

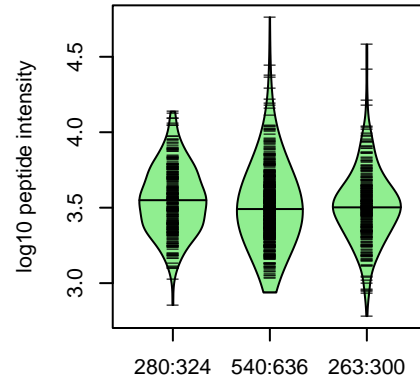

16:8903589:G:T\_T  
p = 0.023, beta = -0.0968, N = 1083

**ASQGPVYK pc2  
I3L3X8;Q9Y2V2**

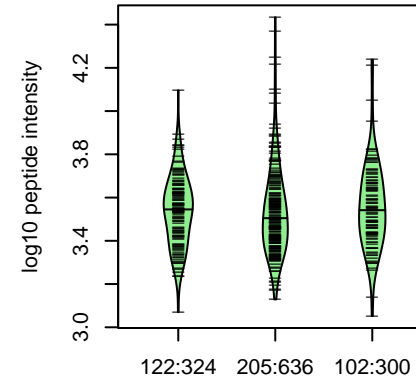

16:8903589:G:T\_T  
p = 0.74, beta = 0.0224, N = 429

**GNVVP SPLPTR pc2  
I3L3X8;Q9Y2V2**

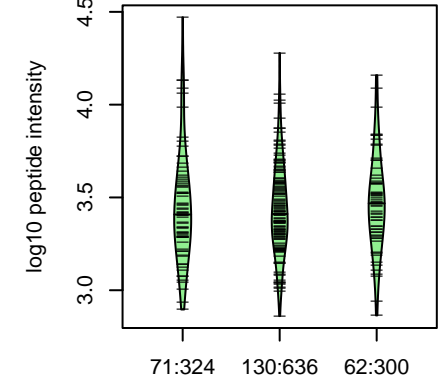

16:8903589:G:T\_T  
p = 0.34, beta = 0.0823, N = 263

**CARHSP1 : NP3  
Q9Y2V2**

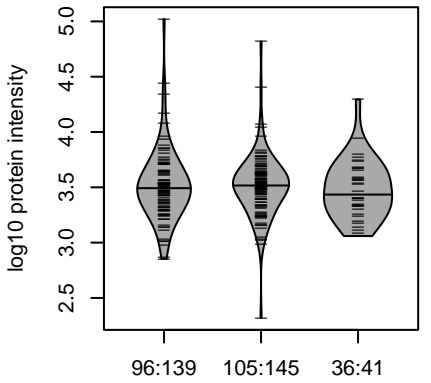

16:8903589:G:T\_T  
p = 0.73, beta = -0.032, N = 237

**LQAVEVVITHLAPGTK pc3  
Q9Y2V2**

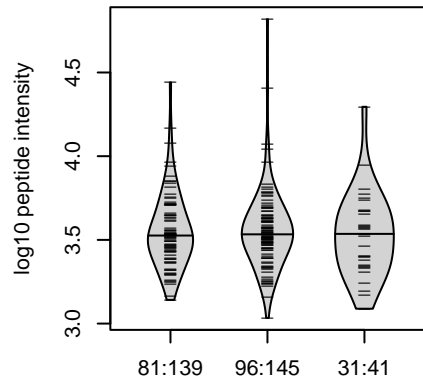

16:8903589:G:T\_T  
p = 0.61, beta = -0.0496, N = 208

**HETWSGHVISS pc2  
Q9Y2V2**

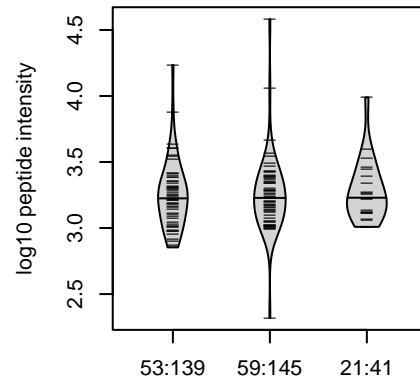

16:8903589:G:T\_T  
p = 0.77, beta = 0.0349, N = 133

**ASQGPVYK pc2  
I3L3X8;Q9Y2V2**

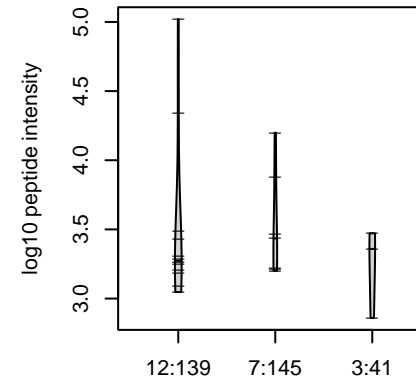

16:8903589:G:T\_T  
p = 0.63, beta = -0.133, N = 22

Assay Target: CARHSP1  
Olink UniProt: Q9Y2V2  
UKB rsID: rs12597479  
Proxy rsID: rs12597479  
UKB SNP: 16:8903589:G:T  
Proxy SNP: 16:8903589:G:T  
UKB log10(p): 40.5  
UKB BETA: -0.081  
- - - - -  
1221:1083:429:338:263

**NSFL1C : NP2**  
**Q9UNZ2-5**

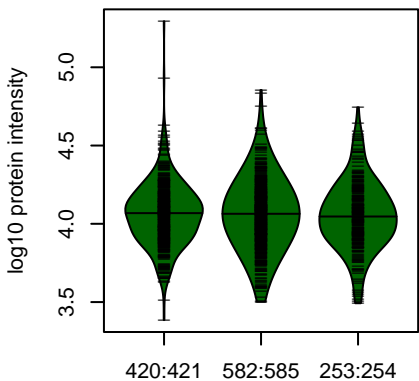

20:1485256:G:C\_C  
p = 0.38, beta = -0.0342, N = 1255

**EANLLNAVIVQR pc2**  
**Q9UNZ2;Q9UNZ2-4;Q9UNZ2-5**

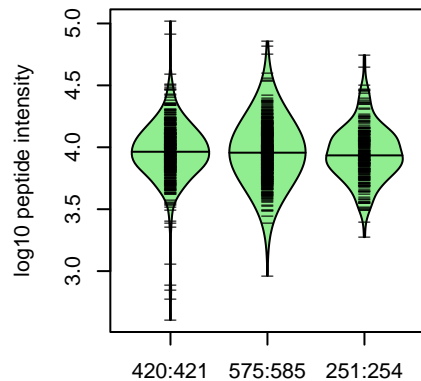

20:1485256:G:C\_C  
p = 0.097, beta = -0.0649, N = 1246

**ELADESQTLLK pc2**  
**Q9UNZ2;Q9UNZ2-4;Q9UNZ2-5**

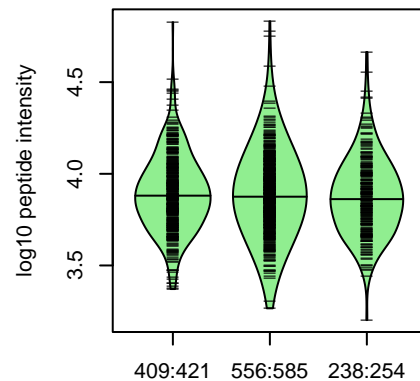

20:1485256:G:C\_C  
p = 0.27, beta = -0.0441, N = 1203

**SGQQIVGPPR pc2**  
**F2Z2K0;Q9UNZ2;Q9UNZ2-4;Q9UNZ2-5**

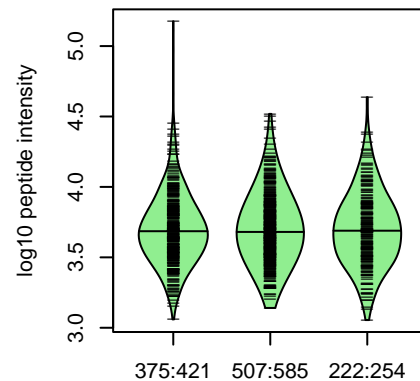

20:1485256:G:C\_C  
p = 0.83, beta = -0.00897, N = 1104

**LAHGGQVNLDMEDHRDEDFVK pc2**  
**F2Z2K0;Q9UNZ2;Q9UNZ2-4;Q9UNZ2-5**

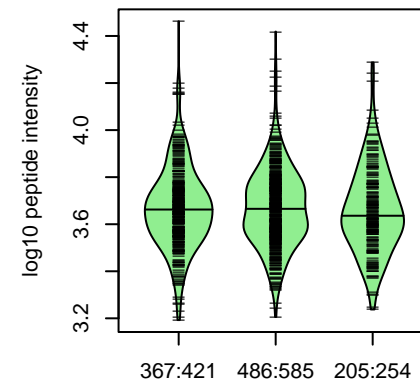

20:1485256:G:C\_C  
p = 0.3, beta = -0.044, N = 1058

**NSFL1C : NP2**  
**Q9UNZ2-5**

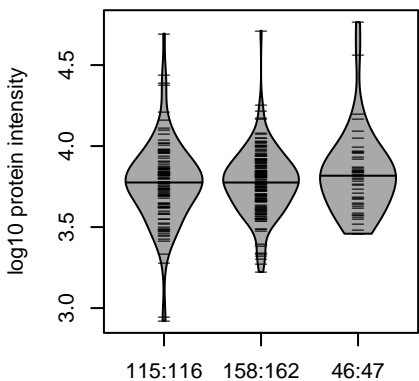

20:1485256:G:C\_G  
p = 0.37, beta = 0.074, N = 319

**EANLLNAVIVQR pc2**  
**Q9UNZ2;Q9UNZ2-4;Q9UNZ2-5**

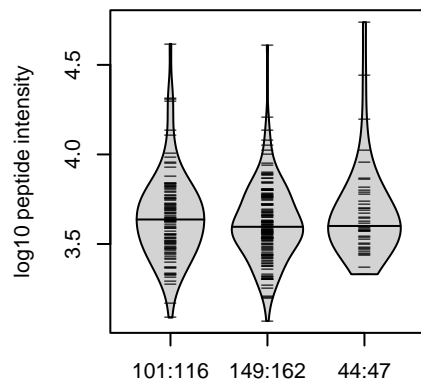

20:1485256:G:C\_G  
p = 0.96, beta = -0.00378, N = 294

**LAHGGQVNLDMEDHRDEDFVK pc2**  
**F2Z2K0;Q9UNZ2;Q9UNZ2-4;Q9UNZ2-5**

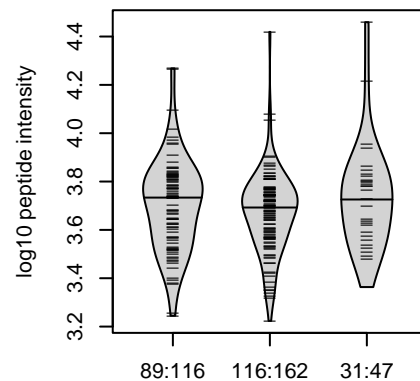

20:1485256:G:C\_G  
p = 0.82, beta = -0.0223, N = 236

**SGFSLDNGELR pc2**  
**F2Z2K0;Q9UNZ2;Q9UNZ2-4;Q9UNZ2-5**

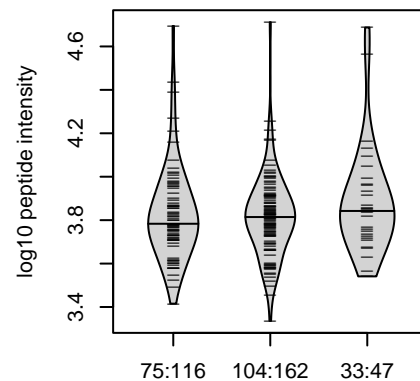

20:1485256:G:C\_G  
p = 0.41, beta = 0.0806, N = 212

**SGQQIVGPPR pc2**  
**F2Z2K0;Q9UNZ2;Q9UNZ2-4;Q9UNZ2-5**

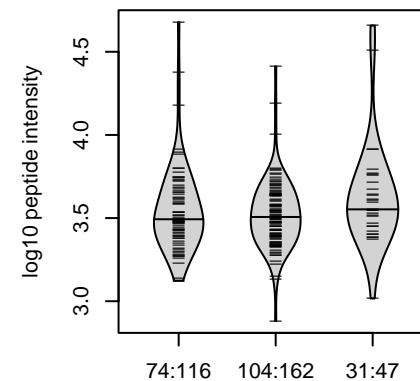

20:1485256:G:C\_G  
p = 0.3, beta = 0.104, N = 209

Assay Target: NSFL1C  
Olink UniProt: Q9UNZ2  
UKB rsID: rs6042675  
Proxy rsID: rs6042675  
UKB SNP: 20:1485256:G:C  
Proxy SNP: 20:1485256:G:C  
UKB log10(p): 38.3  
UKB BETA: -0.08  
-----  
1246:1203:1104:1058:993:981:8

**TINAGL1 : NP2**  
**Q9GZM7;Q9GZM7-3**

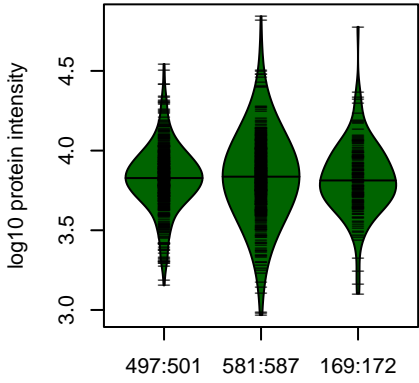

1:32047305:A:G\_A  
 $p = 0.86$ ,  $\beta = 0.00743$ ,  $N = 1247$

**ITGWGEETLPDGR pc2**  
**F6SDV2;Q9GZM7;Q9GZM7-3**

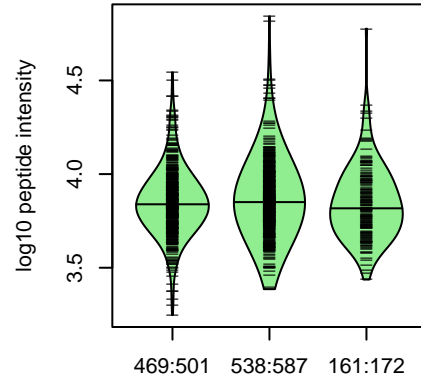

1:32047305:A:G\_A  
 $p = 0.83$ ,  $\beta = 0.00888$ ,  $N = 1168$

**VGMEDMGHH pc2**  
**F6SDV2;Q9GZM7;Q9GZM7-3**

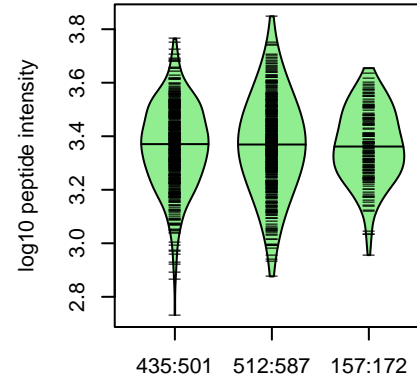

1:32047305:A:G\_A  
 $p = 0.53$ ,  $\beta = 0.0271$ ,  $N = 1104$

**GVNECDIESFVLGVWGR pc3**  
**F6SDV2;Q9GZM7;Q9GZM7-3**

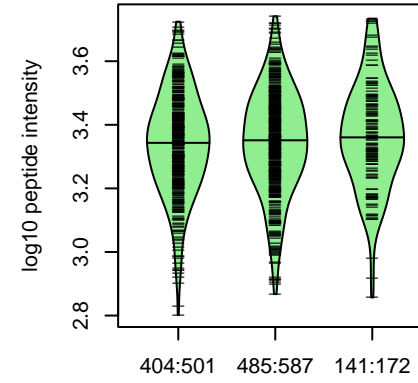

1:32047305:A:G\_A  
 $p = 0.085$ ,  $\beta = 0.0784$ ,  $N = 1030$

**YWTAANSWGPWGR pc2**  
**F6SDV2;Q9GZM7;Q9GZM7-3**

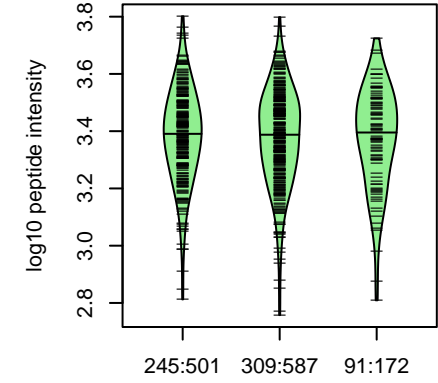

1:32047305:A:G\_A  
 $p = 0.52$ ,  $\beta = -0.0367$ ,  $N = 645$

**TINAGL1 : NP2**  
**Q9GZM7;Q9GZM7-3**

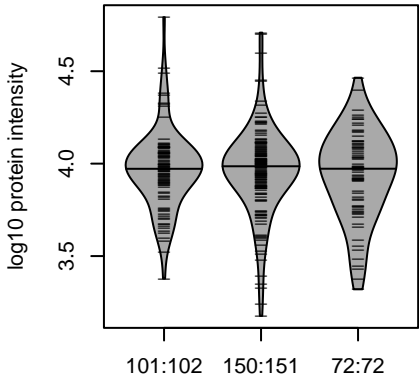

1:32047305:A:G\_A  
 $p = 0.95$ ,  $\beta = 0.0048$ ,  $N = 323$

**ITGWGEETLPDGR pc2**  
**F6SDV2;Q9GZM7;Q9GZM7-3**

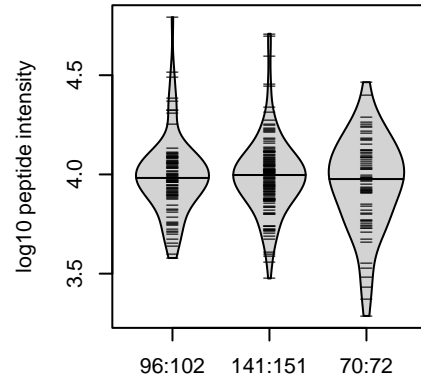

1:32047305:A:G\_A  
 $p = 0.91$ ,  $\beta = -0.00864$ ,  $N = 307$

**GVNECDIESFVLGVWGR pc3**  
**F6SDV2;Q9GZM7;Q9GZM7-3**

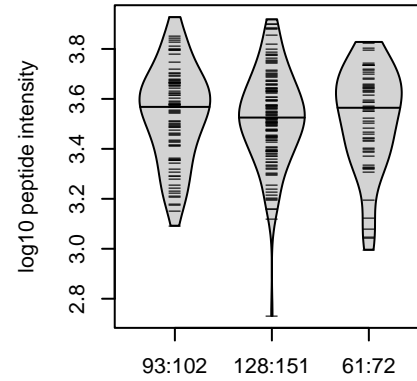

1:32047305:A:G\_A  
 $p = 0.77$ ,  $\beta = -0.0231$ ,  $N = 282$

**VGMEDMGHH pc2**  
**F6SDV2;Q9GZM7;Q9GZM7-3**

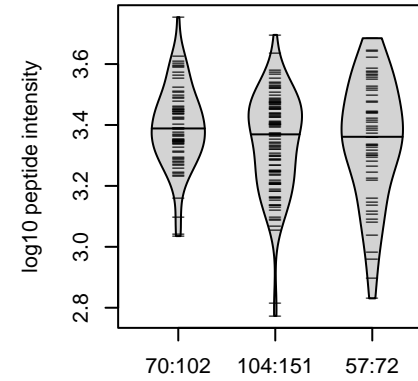

1:32047305:A:G\_A  
 $p = 0.38$ ,  $\beta = -0.0774$ ,  $N = 231$

**YWTAANSWGPWGR pc2**  
**F6SDV2;Q9GZM7;Q9GZM7-3**

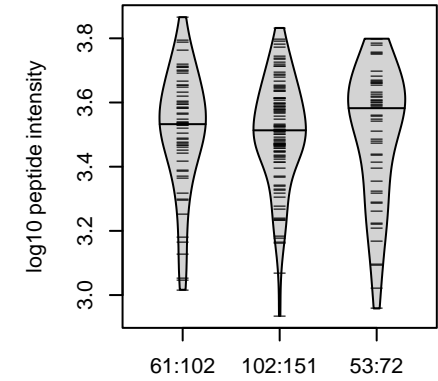

1:32047305:A:G\_A  
 $p = 0.6$ ,  $\beta = 0.0487$ ,  $N = 216$

Assay Target: TINAGL1  
Olink UniProt: Q9GZM7  
UKB rsID: rs945214  
Proxy rsID: rs945214  
UKB SNP: 1:32047305:A:G  
Proxy SNP: 1:32047305:A:G  
UKB log10(p): 38  
UKB BETA: -0.082  
-----  
1168:1104:1030:645:530:427:38





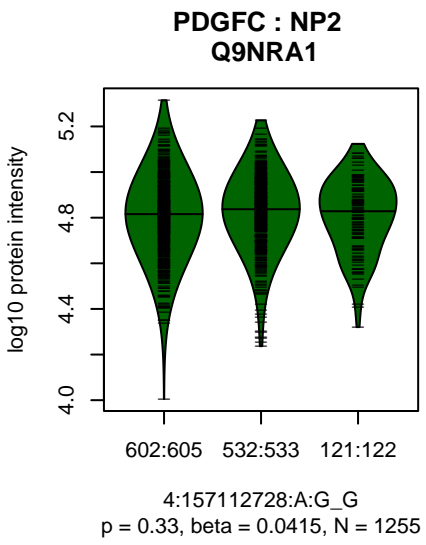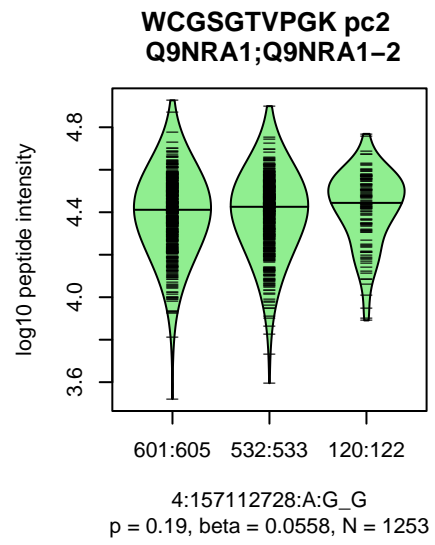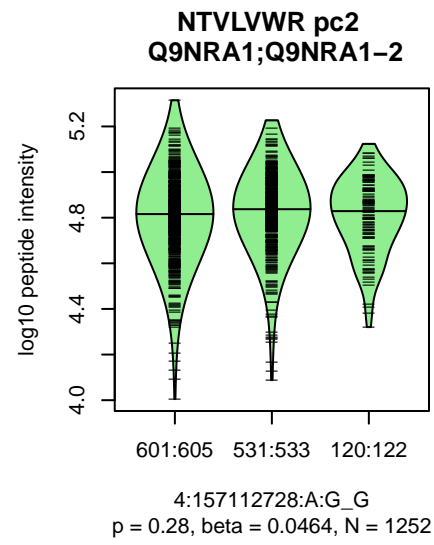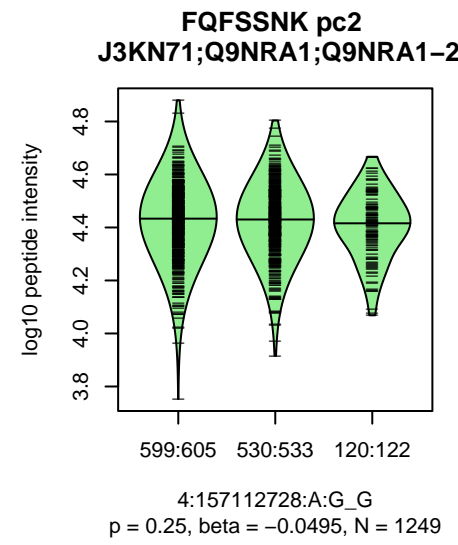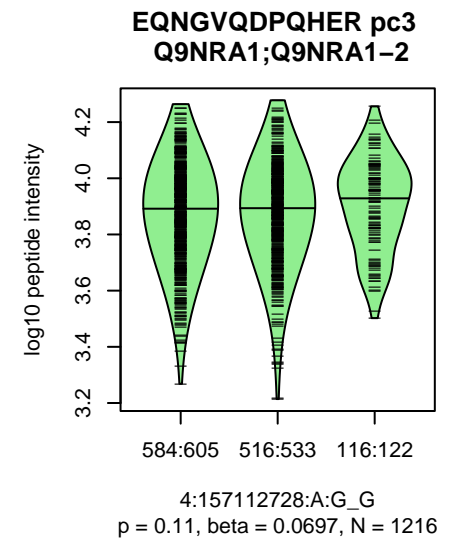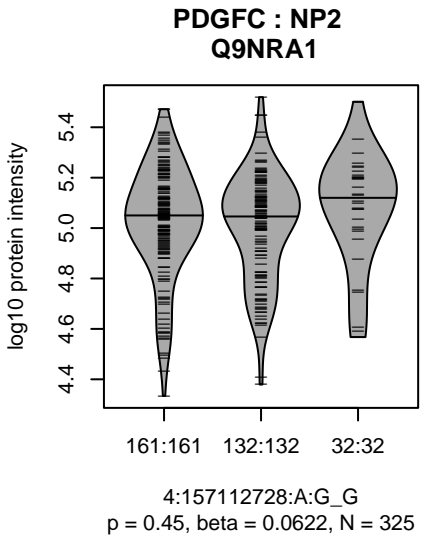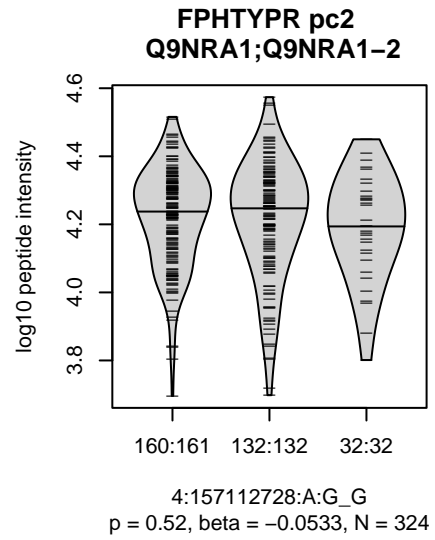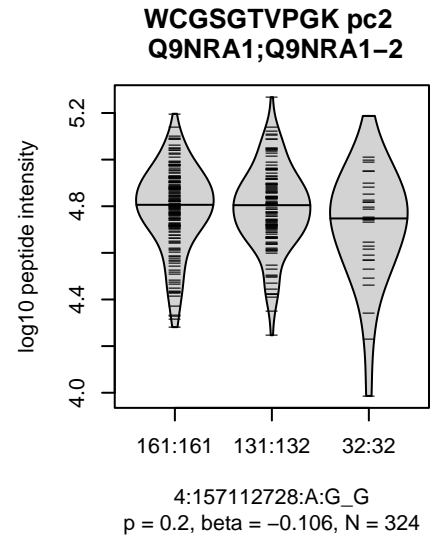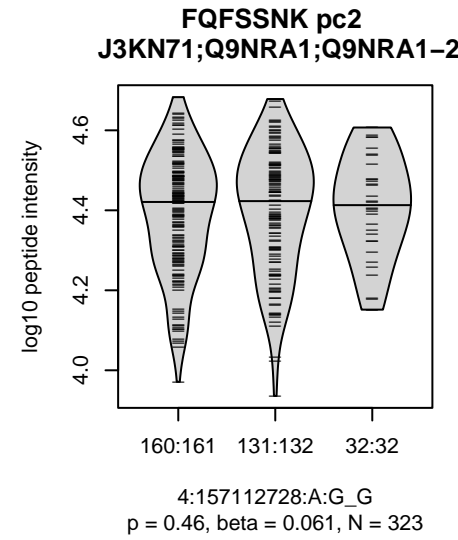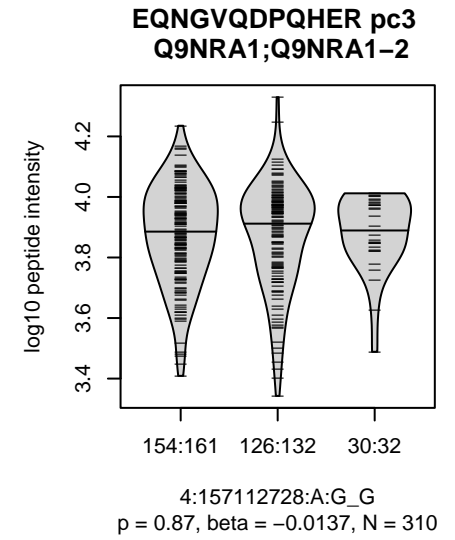

Assay Target: PDGFC  
 Olink UniProt: Q9NRA1  
 UKB rsID: rs2341218  
 Proxy rsID: rs2341218  
 UKB SNP: 4:157112728:A:G  
 Proxy SNP: 4:157112728:A:G  
 UKB log10(p): 36.6  
 UKB BETA: -0.086  
 -----NA:NA:N  
 1253:1252:1249:1216:1181:106

**NEXN : NP2  
Q0ZGT2**

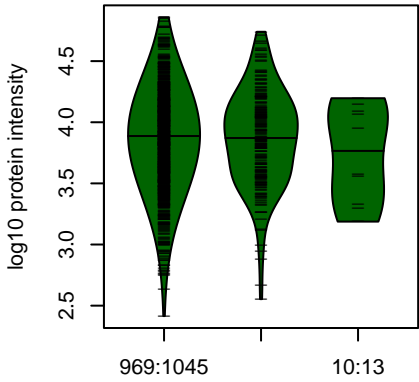

1:78438138:G:T\_T  
p = 0.44, beta = 0.0555, N = 1170

**NTSVVDSEPVR pc2  
Q0ZGT2;Q0ZGT2-4**

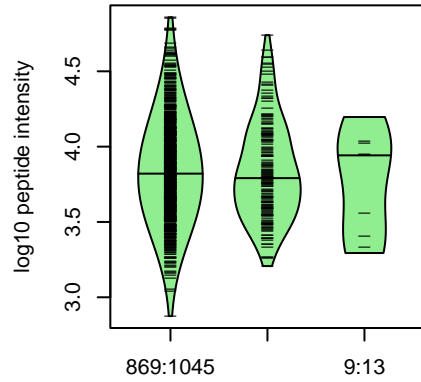

1:78438138:G:T\_T  
p = 0.76, beta = 0.0226, N = 1051

**LEINFEELLK pc2  
Q0ZGT2;Q0ZGT2-4**

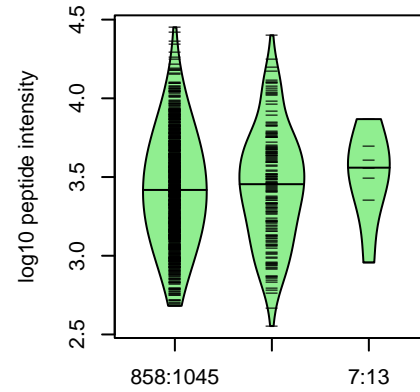

1:78438138:G:T\_T  
p = 0.17, beta = 0.106, N = 1034

**GSAASTCILTIESK pc2  
Q0ZGT2;Q0ZGT2-4**

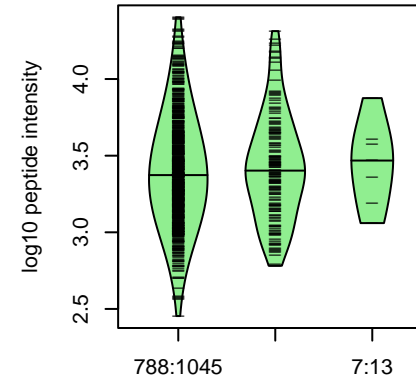

1:78438138:G:T\_T  
p = 0.18, beta = 0.109, N = 950

**AIDLEIK pc2  
Q0ZGT2;Q0ZGT2-4**

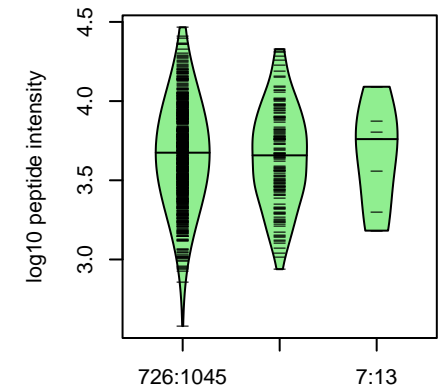

1:78438138:G:T\_T  
p = 0.93, beta = -0.00775, N = 875

**NEXN : NP2  
Q0ZGT2;Q0ZGT2-4**

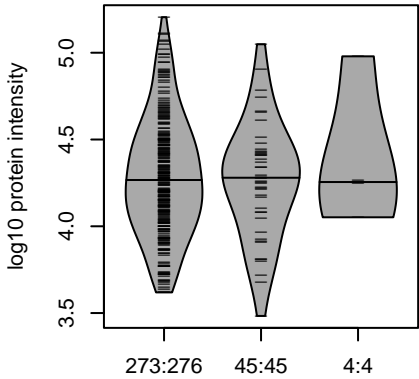

1:78438138:G:T\_T  
p = 0.89, beta = -0.0189, N = 322

**NTSVVDSEPVR pc2  
Q0ZGT2;Q0ZGT2-4**

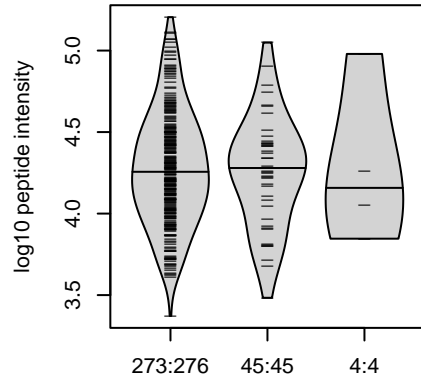

1:78438138:G:T\_T  
p = 0.64, beta = -0.0639, N = 322

**LEINFEELLK pc2  
Q0ZGT2;Q0ZGT2-4**

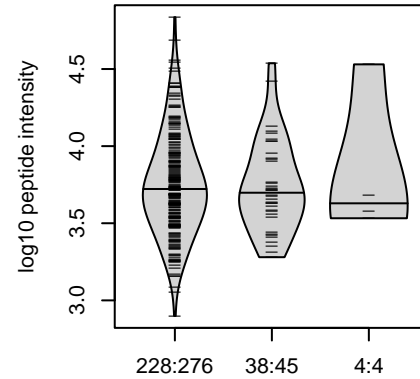

1:78438138:G:T\_T  
p = 0.94, beta = 0.0109, N = 270

**GSAASTCILTIESK pc2  
Q0ZGT2;Q0ZGT2-4**

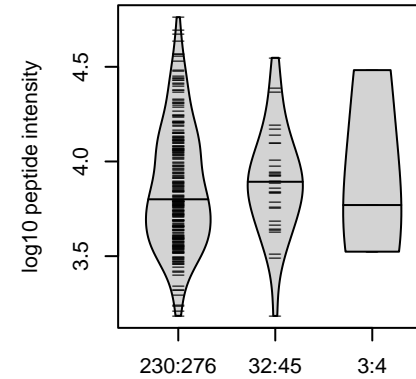

1:78438138:G:T\_T  
p = 0.47, beta = 0.115, N = 265

**LSFEEMER pc2  
Q0ZGT2;Q0ZGT2-4**

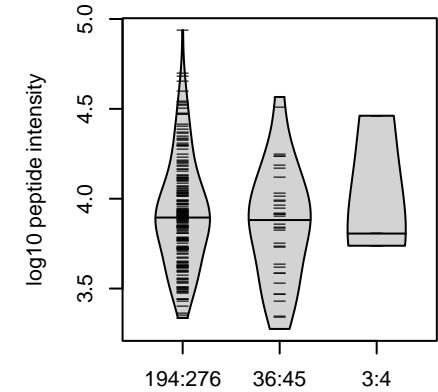

1:78438138:G:T\_T  
p = 0.49, beta = -0.107, N = 233

Assay Target: NEXN  
Olink UniProt: Q0ZGT2  
UKB rsID: rs17387365  
Proxy rsID: rs17387365  
UKB SNP: 1:78438138:G:T  
Proxy SNP: 1:78438138:G:T  
UKB log10(p): 35.4  
UKB BETA: -0.143  
-----  
1051:1034:950:875:837:792:564

**FSTL3 : NP2**  
**O95633**

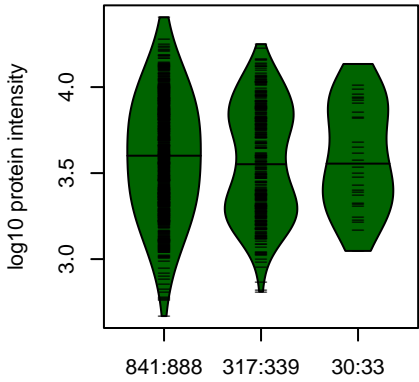

19:662431:T:C\_T  
p = 0.21, beta = -0.0699, N = 1188

**INLLGFLGLVHCLPCK pc3**  
**O95633**

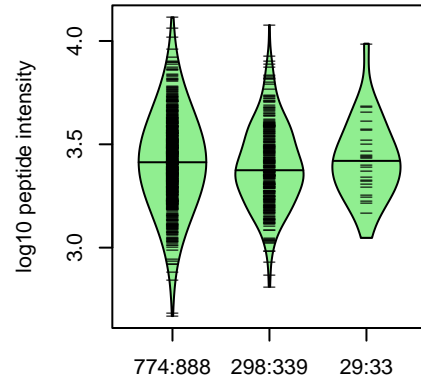

19:662431:T:C\_T  
p = 0.19, beta = -0.0763, N = 1101

**CECAPDCSGLPAR pc2**  
**O95633**

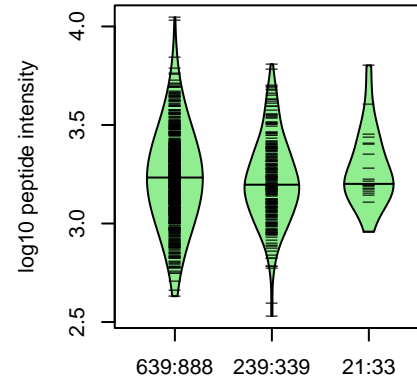

19:662431:T:C\_T  
p = 0.96, beta = -0.00289, N = 899

**QATCFLGR pc2**  
**K7EM71;O95633**

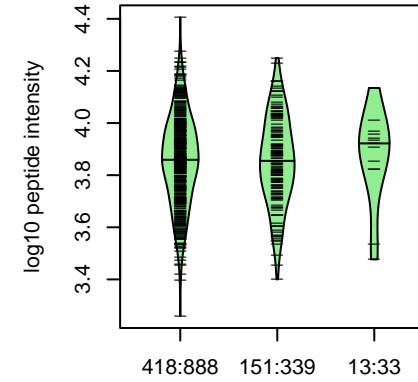

19:662431:T:C\_T  
p = 0.94, beta = -0.00598, N = 582

**LQVCGSDGATYRDECEL R pc3**  
**O95633**

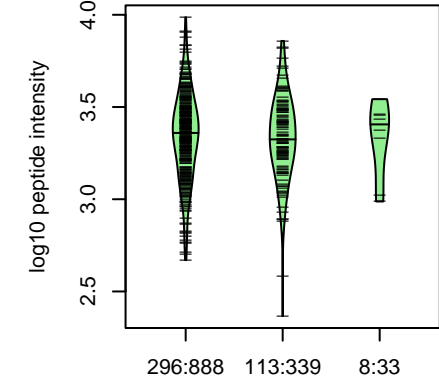

19:662431:T:C\_T  
p = 0.71, beta = -0.0365, N = 417

**FSTL3 : NP2**  
**O95633**

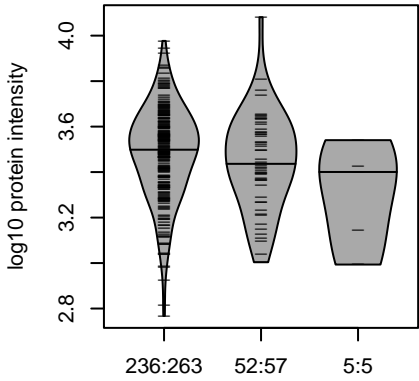

19:662431:T:C\_T  
p = 0.13, beta = -0.195, N = 293

**INLLGFLGLVHCLPCK pc3**  
**O95633**

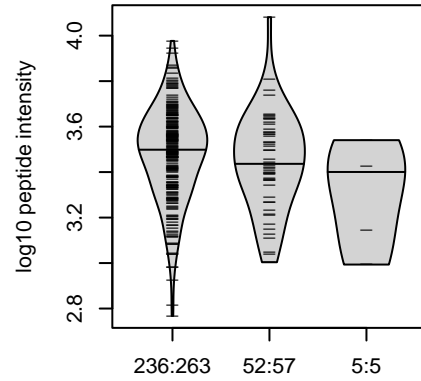

19:662431:T:C\_T  
p = 0.14, beta = -0.189, N = 293

Assay Target: FSTL3  
Olink UniProt: O95633  
UKB rsID: rs929263  
Proxy rsID: rs4919882  
UKB SNP: 19:663373:C:T  
Proxy SNP: 19:662431:T:C  
UKB log10(p): 34.9  
UKB BETA: 0.099  
-:-:-:-  
1101:899:582:417

**HCLS1 : NP2  
P14317**

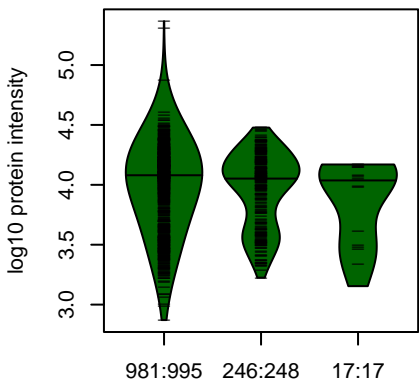

3:121377905:C:A\_A  
p = 0.17, beta = -0.087, N = 1244

**EHPVLLPIR pc2  
E7EVW7;P14317**

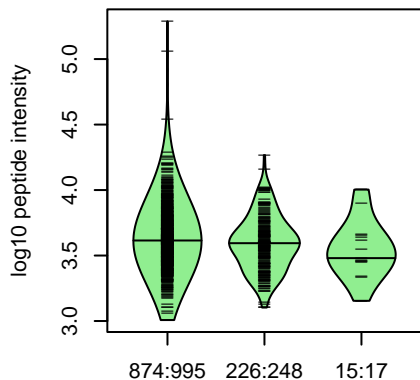

3:121377905:C:A\_A  
p = 0.029, beta = -0.144, N = 1115

**SAVGHEYVAEVEK pc3  
E7EVW7;P14317;P14317-2**

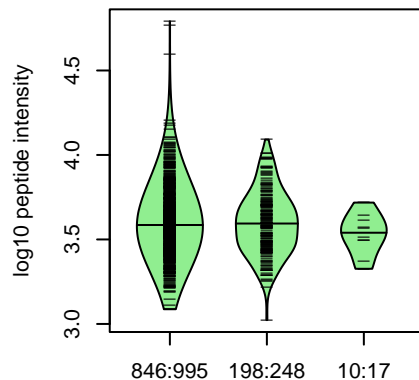

3:121377905:C:A\_A  
p = 0.97, beta = -0.00235, N = 1054

**FESMAEEK pc2  
E7EVW7;P14317**

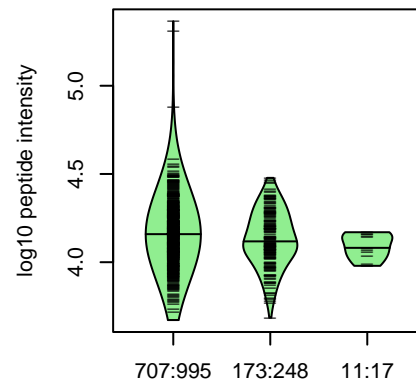

3:121377905:C:A\_A  
p = 0.034, beta = -0.159, N = 891

**TEHINIHLR pc3  
E7EVW7;P14317;P14317-2**

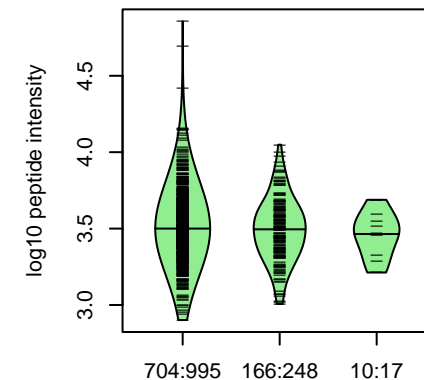

3:121377905:C:A\_A  
p = 0.39, beta = -0.0667, N = 880

**HCLS1 : NP2  
P14317**

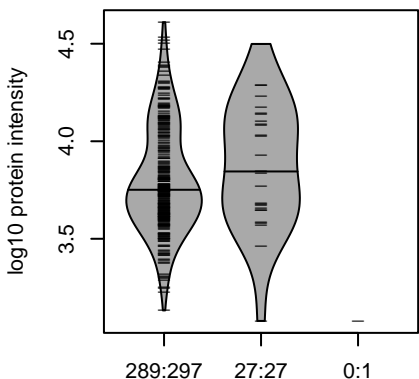

3:121377905:C:A\_A  
p = 0.33, beta = 0.194, N = 316

**EHPVLLPIR pc2  
E7EVW7;P14317**

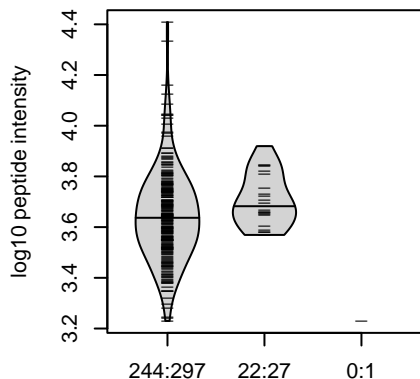

3:121377905:C:A\_A  
p = 0.08, beta = 0.384, N = 266

**GFGGQYGIQK pc2  
E7EVW7;P14317**

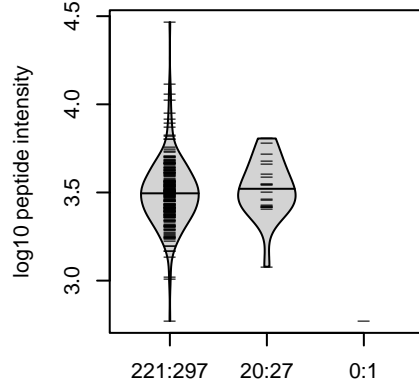

3:121377905:C:A\_A  
p = 0.32, beta = 0.229, N = 241

**CHGHFGLFPANYVK pc3  
E7EVW7;P14317**

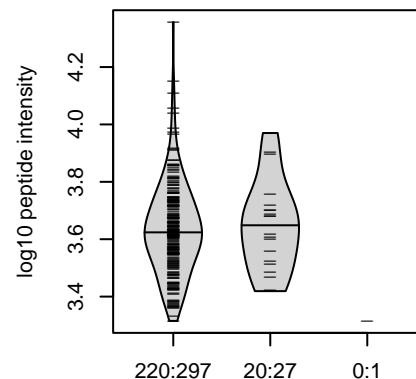

3:121377905:C:A\_A  
p = 0.89, beta = -0.0311, N = 240

**SAVGHEYVAEVEK pc3  
E7EVW7;P14317;P14317-2**

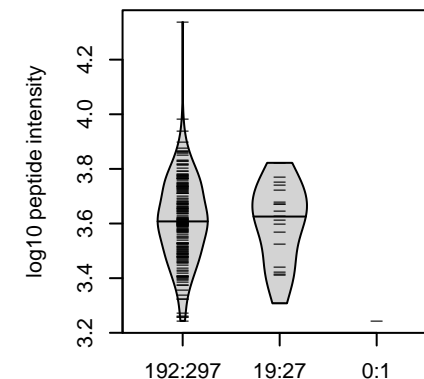

3:121377905:C:A\_A  
p = 0.42, beta = -0.191, N = 211

**TLEGLQVEEPVYK pc2  
rs2070180 ALT**

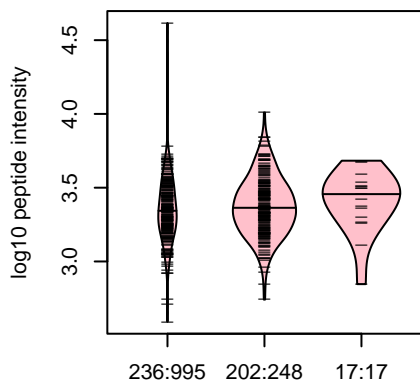

3:121377905:C:A\_A  
p = 7.5e-70, model = REC, N = 455

**TTPIEAASSGTR pc2  
rs2070179 REF**

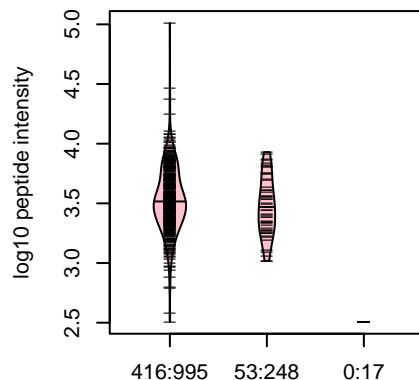

3:121377905:C:A\_A  
p = 1.9e-11, model = REC, N = 469

**TTPIEAASSGAR pc2  
rs2070179 ALT**

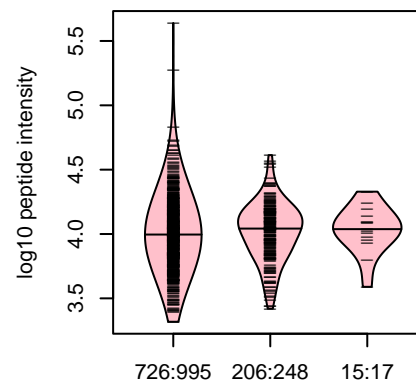

3:121377905:C:A\_A  
p = 0.00041, model = REC, N = 947

Assay Target: HCLS1  
Olink UniProt: P14317  
UKB rsID: rs78654812  
Proxy rsID: rs78654812  
UKB SNP: 3:121377905:C:A  
Proxy SNP: 3:121377905:C:A  
UKB log10(p): 34.2  
UKB BETA: -0.107  
-----  
1115:1054:891:880:845:727:623

**RHOC : NP1  
P08134**

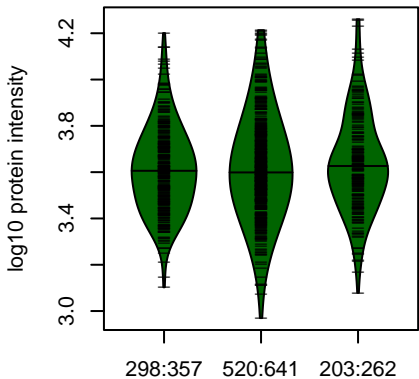

1:113061959:G:C\_C  
p = 0.18, beta = 0.0601, N = 1021

**TCLLIVFSK pc2  
0A7I2YQV1;C9JRM1;C9JX21;E9PLA2**

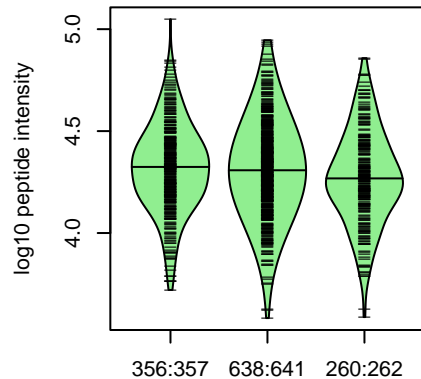

1:113061959:G:C\_C  
p = 0.013, beta = -0.1, N = 1254

**EVFEMATR pc2  
A0A7I2YQV1;P08134;P61586**

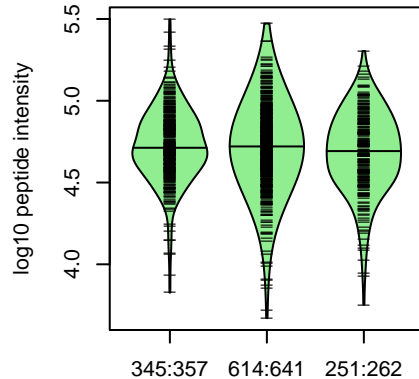

1:113061959:G:C\_C  
p = 0.074, beta = -0.0734, N = 1210

**HFCPNVPIILVGNK pc3  
0A7I2V3G1;C9JX21;Q5JR05;P08134;F6;A0A7I2YQV1;C9JRM1;C9JX21;E9P**

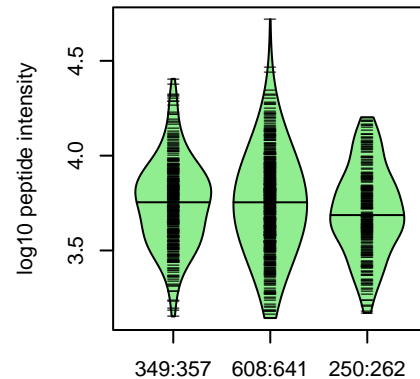

1:113061959:G:C\_C  
p = 0.024, beta = -0.0924, N = 1207

**LVIVGDGACGK pc2  
0A7I2V3G1;C9JX21;Q5JR05;P08134;F6;A0A7I2YQV1;C9JRM1;C9JX21;E9P**

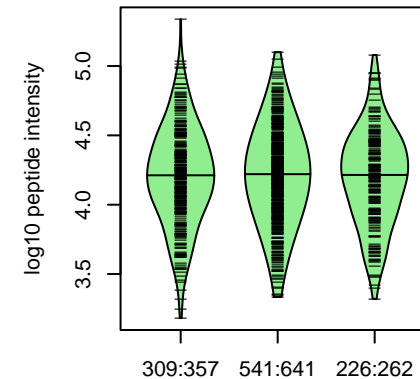

1:113061959:G:C\_C  
p = 0.54, beta = -0.0267, N = 1076

**RHOC : NP1  
P08134**

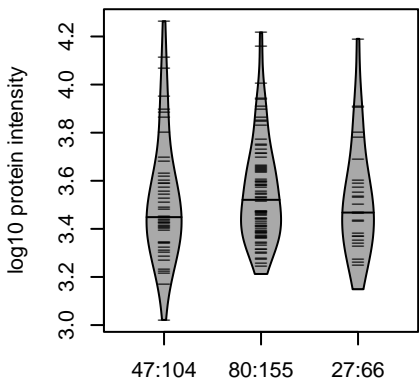

1:113061959:G:C\_C  
p = 0.46, beta = 0.0852, N = 154

**TCLLIVFSK pc2  
0A7I2YQV1;C9JRM1;C9JX21;E9PLA2**

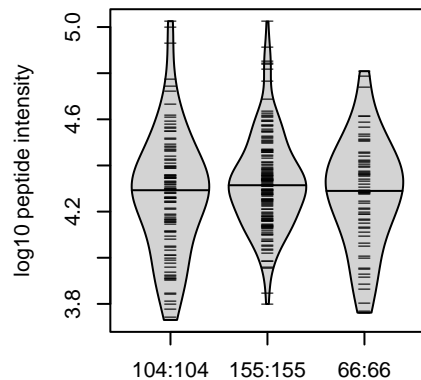

1:113061959:G:C\_C  
p = 0.55, beta = 0.0455, N = 325

**EVFEMATR pc2  
A0A7I2YQV1;P08134;P61586**

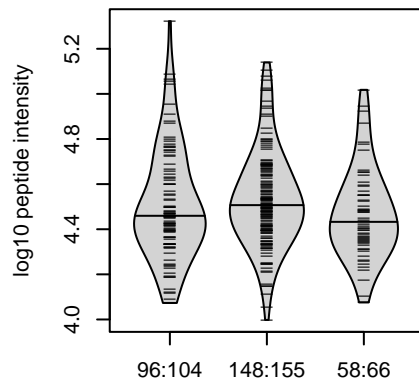

1:113061959:G:C\_C  
p = 0.79, beta = -0.0219, N = 302

**LVIVGDGACGK pc2  
0A7I2V3G1;C9JX21;Q5JR05;P08134;F6;A0A7I2YQV1;C9JRM1;C9JX21;E9P**

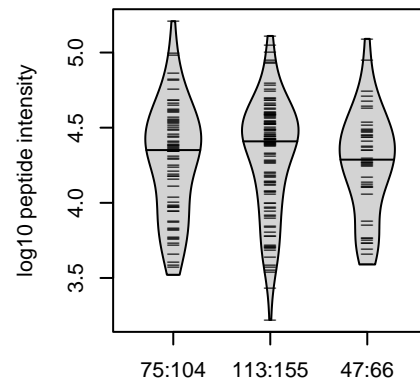

1:113061959:G:C\_C  
p = 0.52, beta = -0.0587, N = 235

**HFCPNVPIILVGNK pc3  
0A7I2V3G1;C9JX21;Q5JR05;P08134;F6;A0A7I2YQV1;C9JRM1;C9JX21;E9P**

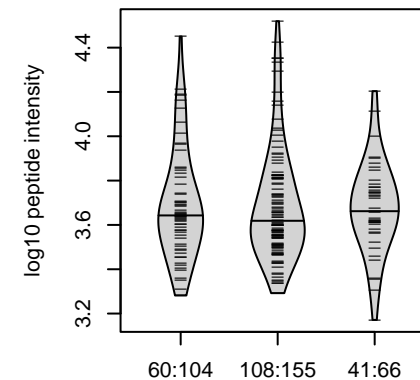

1:113061959:G:C\_C  
p = 0.71, beta = -0.0372, N = 209

Assay Target: RHOC  
Olink UniProt: P08134  
UKB rsID: rs1006298  
Proxy rsID: rs1006298  
UKB SNP: 1:113061959:G:C  
Proxy SNP: 1:113061959:G:C  
UKB log10(p): 33.9  
UKB BETA: 0.076  
-----  
1254:1210:1207:1076:1009:842

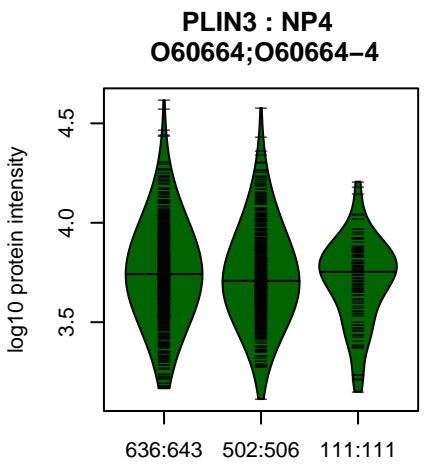

19:4859937:T:C\_T  
p = 0.14, beta = -0.0641, N = 1249

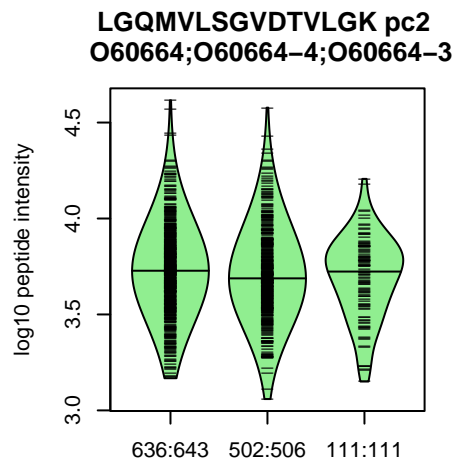

19:4859937:T:C\_T  
p = 0.11, beta = -0.0699, N = 1249

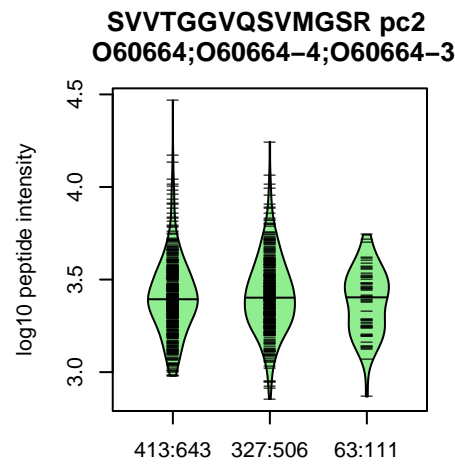

19:4859937:T:C\_T  
p = 0.62, beta = -0.0274, N = 803

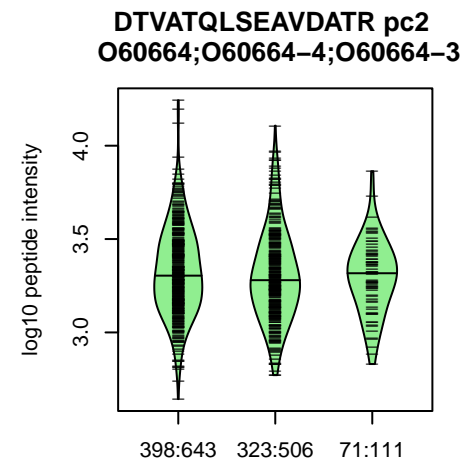

19:4859937:T:C\_T  
p = 0.27, beta = -0.0597, N = 792

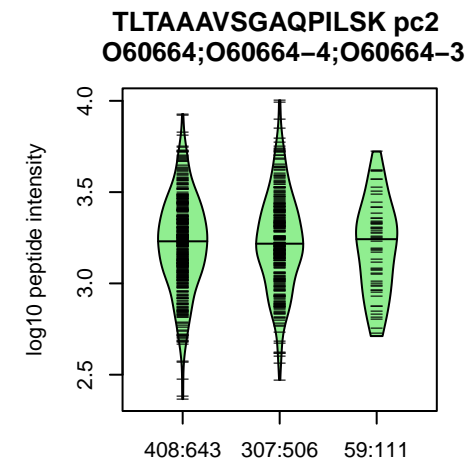

19:4859937:T:C\_T  
p = 0.88, beta = -0.00823, N = 774

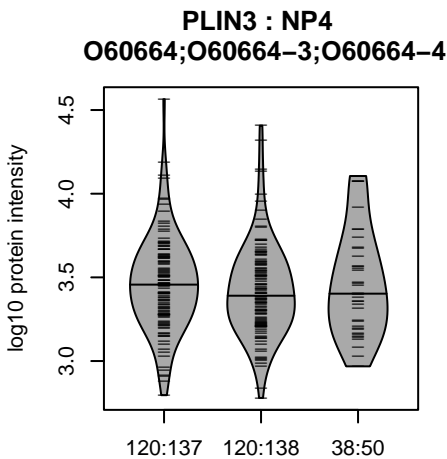

19:4859937:T:C\_T  
p = 0.4, beta = -0.0717, N = 278

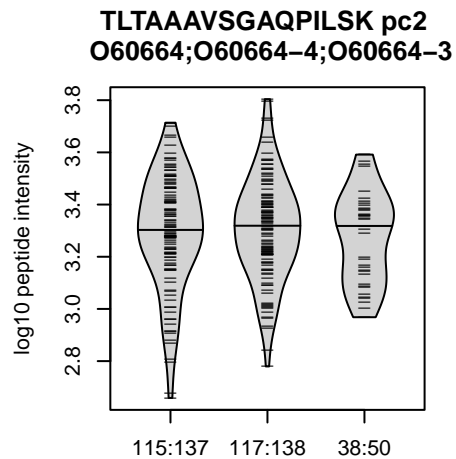

19:4859937:T:C\_T  
p = 0.58, beta = -0.0475, N = 270

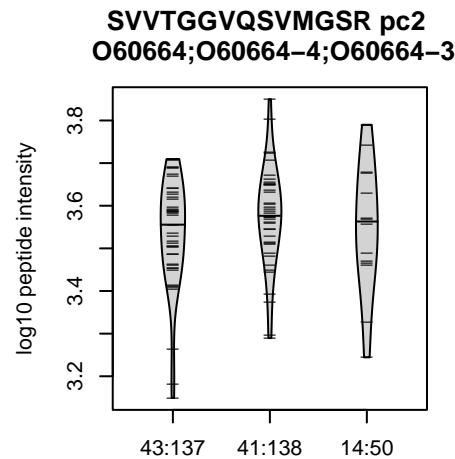

19:4859937:T:C\_T  
p = 0.93, beta = -0.0121, N = 98

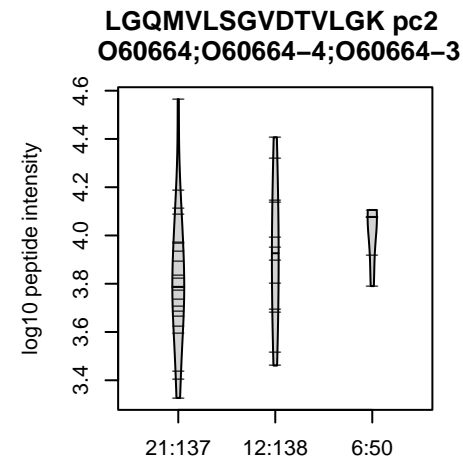

19:4859937:T:C\_T  
p = 0.16, beta = 0.288, N = 39

**QRAQEALLQLSQALSLMETVK pc2**  
**rs9973235 ALT**

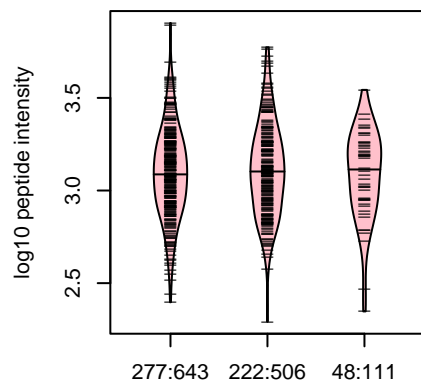

19:4859937:T:C\_T  
p = 0.82, model = REC, N = 547

Assay Target: PLIN3  
Olink UniProt: O60664  
UKB rsID: rs8289  
Proxy rsID: rs8289  
UKB SNP: 19:4859937:T:C  
Proxy SNP: 19:4859937:T:C  
UKB log10(p): 31.7  
UKB BETA: 0.084  
-----  
1249:803:792:774:658:635:369:

**CD34 : NP2  
P28906**

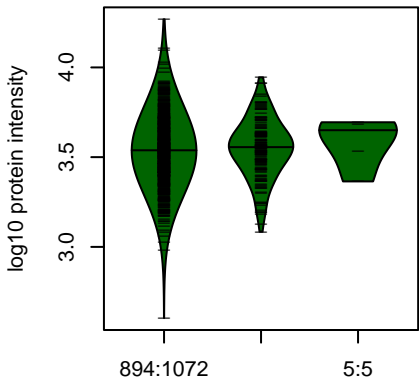

1:208057800:C:T\_T  
p = 0.35, beta = 0.0772, N = 1051

**TSSCAEFK pc2  
P28906;P28906-2**

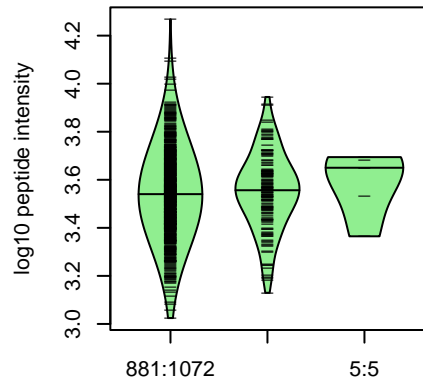

1:208057800:C:T\_T  
p = 0.32, beta = 0.0824, N = 1037

**QHVVADTEL pc2  
P28906;Q5JTA5**

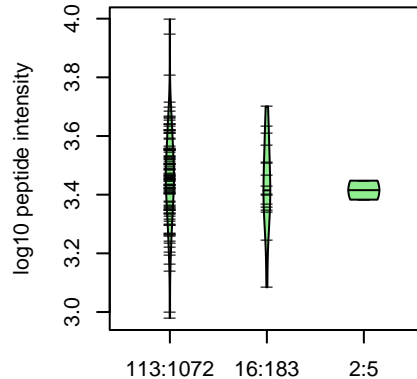

1:208057800:C:T\_T  
p = 0.41, beta = -0.175, N = 131

**CD34 : NP2  
P28906**

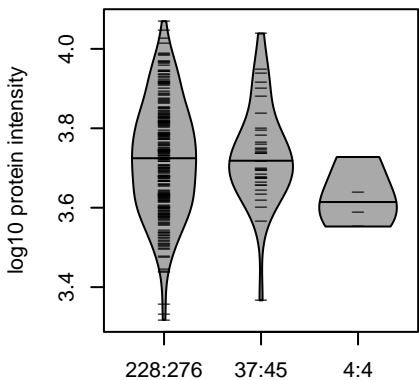

1:208057800:C:T\_T  
p = 0.87, beta = -0.0249, N = 269

**TSSCAEFK pc2  
P28906;P28906-2**

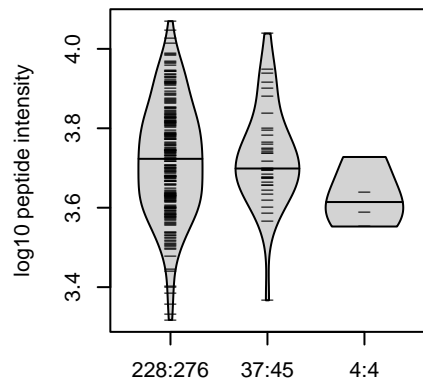

1:208057800:C:T\_T  
p = 0.77, beta = -0.0428, N = 269

Assay Target: CD34  
Olink UniProt: P28906  
UKB rsID: rs6671850  
Proxy rsID: rs6671850  
UKB SNP: 1:208057800:C:T  
Proxy SNP: 1:208057800:C:T  
UKB log10(p): 30.4  
UKB BETA: 0.14  
-:-:NA  
1037:131:9





**CCDC80 : NP3  
Q76M96**

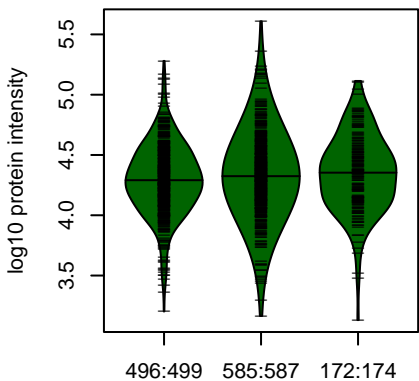

3:112366816:G:A\_G  
p = 0.1, beta = 0.0671, N = 1253

**STLEPNLQLQR pc2  
Q76M96**

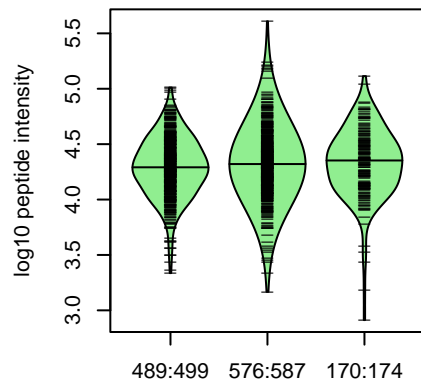

3:112366816:G:A\_G  
p = 0.15, beta = 0.0596, N = 1235

**FGMVLLK pc2  
Q76M96**

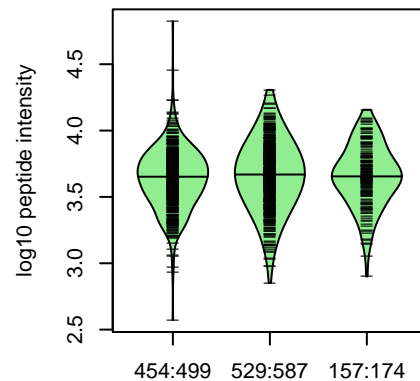

3:112366816:G:A\_G  
p = 0.23, beta = 0.0518, N = 1140

**SDINGAAVRPEQR pc3  
Q76M96**

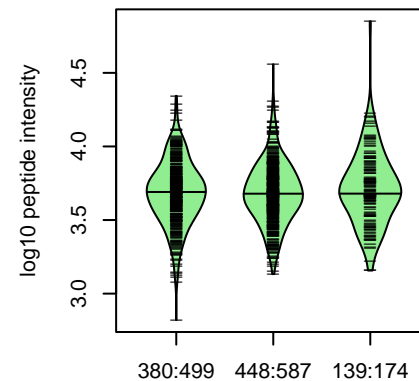

3:112366816:G:A\_G  
p = 0.75, beta = 0.0147, N = 967

**LMMSLLK pc2  
Q76M96**

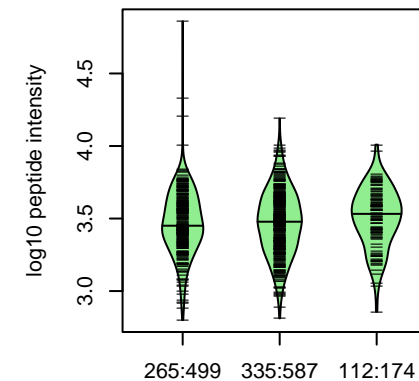

3:112366816:G:A\_G  
p = 0.5, beta = 0.0362, N = 712

**CCDC80 : NP3  
Q76M96**

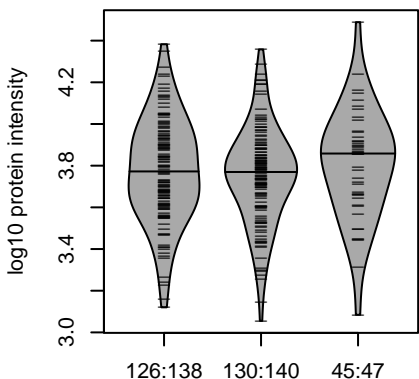

3:112366816:G:A\_G  
p = 0.77, beta = 0.0232, N = 301

**STLEPNLQLQR pc2  
Q76M96**

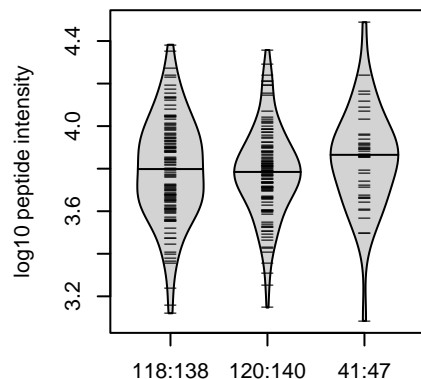

3:112366816:G:A\_G  
p = 0.81, beta = 0.0197, N = 279

**FGMVLLK pc2  
Q76M96**

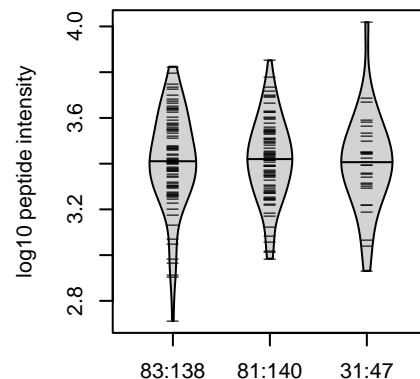

3:112366816:G:A\_G  
p = 0.23, beta = -0.117, N = 195

**LEAMYEVIDQGPIR pc2  
Q76M96**

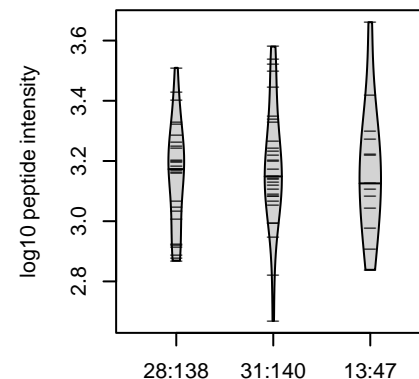

3:112366816:G:A\_G  
p = 0.62, beta = -0.0775, N = 72

**SDINGAAVRPEQR pc3  
Q76M96**

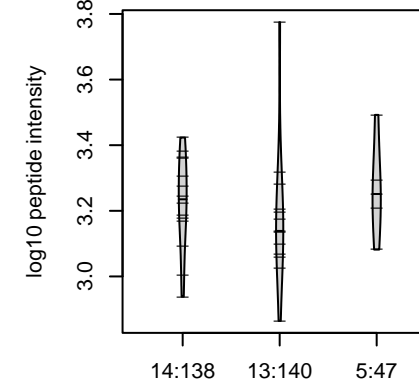

3:112366816:G:A\_G  
p = 0.88, beta = -0.0351, N = 32

Assay Target: CCDC80  
Olink UniProt: Q76M96  
UKB rsID: rs6438087  
Proxy rsID: rs6438087  
UKB SNP: 3:112366816:G:A  
Proxy SNP: 3:112366816:G:A  
UKB log10(p): 28.2  
UKB BETA: -0.064  
-----  
1235:1140:967:712:619:599:577

**CXCL14 : NP4**  
**A0A0C4DGC1;O95715**

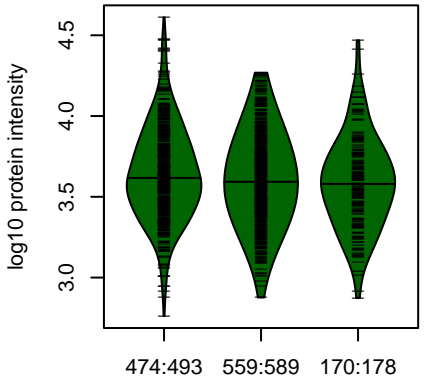

5:134955821:A:G\_G  
 $p = 0.025$ ,  $\beta = -0.0937$ ,  $N = 1203$

**YPHCEEK pc2**  
**A0A0C4DGC1;O95715**

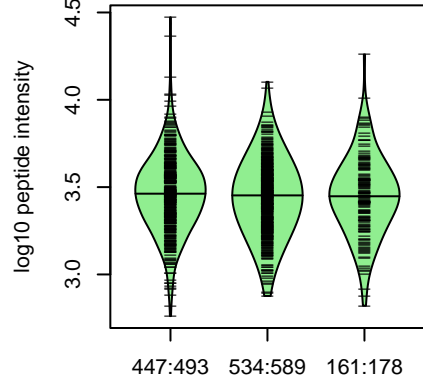

5:134955821:A:G\_G  
 $p = 0.34$ ,  $\beta = -0.041$ ,  $N = 1142$

**MVIITTK pc2**  
**A0A0C4DGC1;O95715**

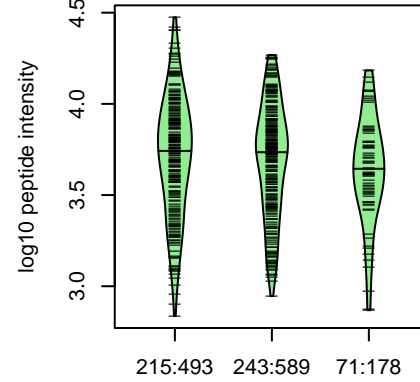

5:134955821:A:G\_G  
 $p = 0.062$ ,  $\beta = -0.118$ ,  $N = 529$

**WYNAWNEK pc2**  
**A0A0C4DGC1;O95715**

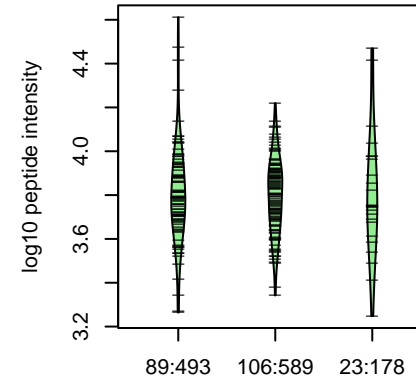

5:134955821:A:G\_G  
 $p = 0.86$ ,  $\beta = 0.0186$ ,  $N = 218$

**CXCL14 : NP4**  
**A0A0C4DGC1;O95715**

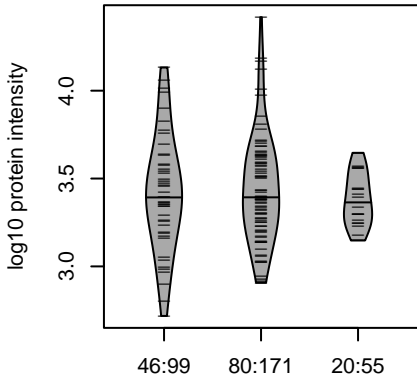

5:134955821:A:G\_G  
 $p = 0.89$ ,  $\beta = 0.018$ ,  $N = 146$

**MVIITTK pc2**  
**A0A0C4DGC1;O95715**

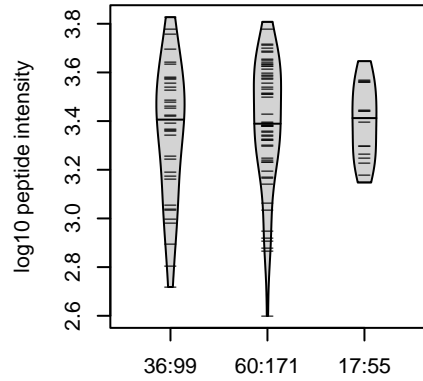

5:134955821:A:G\_G  
 $p = 0.44$ ,  $\beta = 0.106$ ,  $N = 113$

**YPHCEEK pc2**  
**A0A0C4DGC1;O95715**

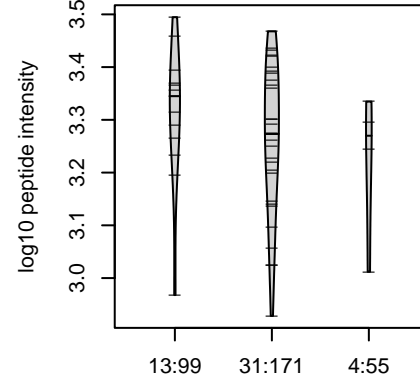

5:134955821:A:G\_G  
 $p = 0.16$ ,  $\beta = -0.337$ ,  $N = 48$

Assay Target: CXCL14  
Olink UniProt: O95715  
UKB rsID: rs6596251  
Proxy rsID: rs6596251  
UKB SNP: 5:134955821:A:G  
Proxy SNP: 5:134955821:A:G  
UKB log10(p): 27.1  
UKB BETA: -0.063  
-:-:-  
1142:529:218

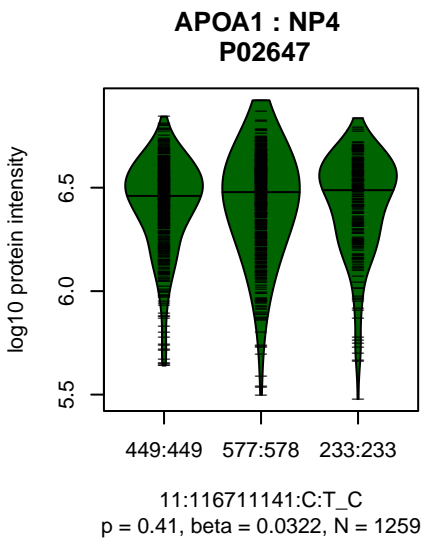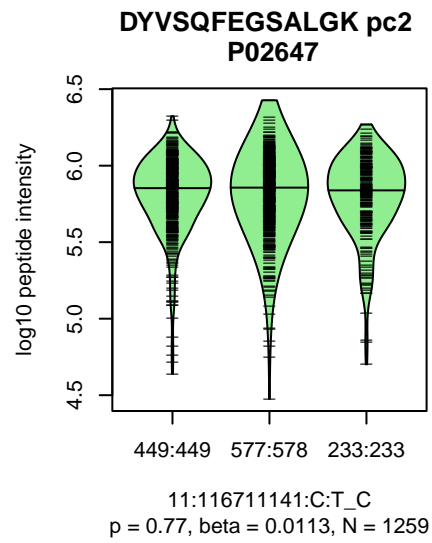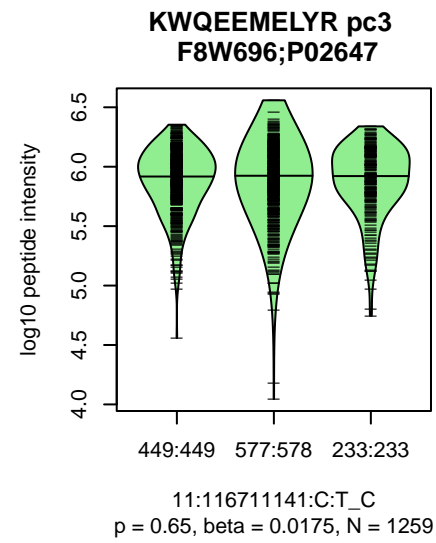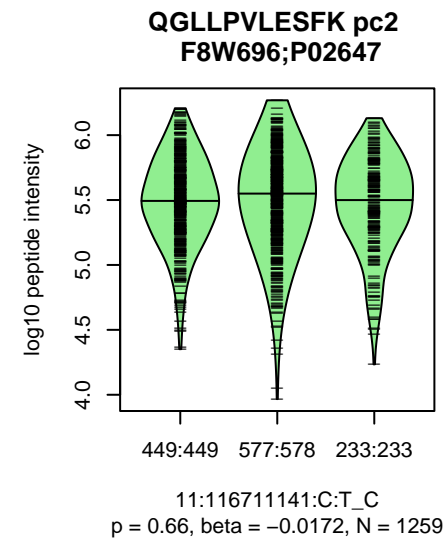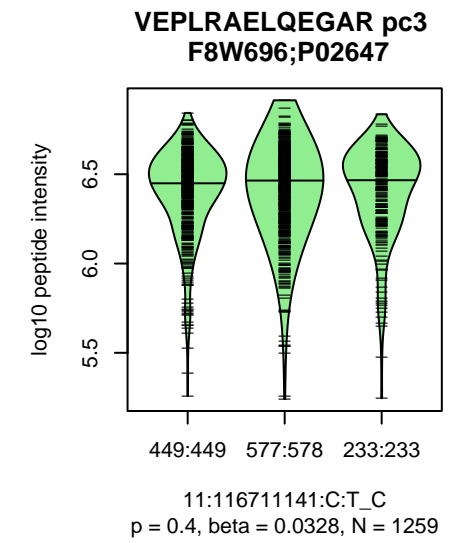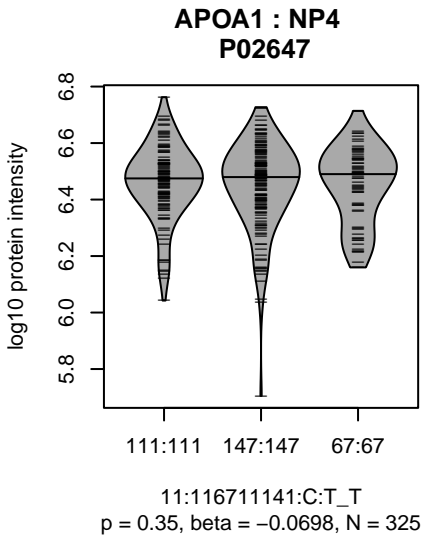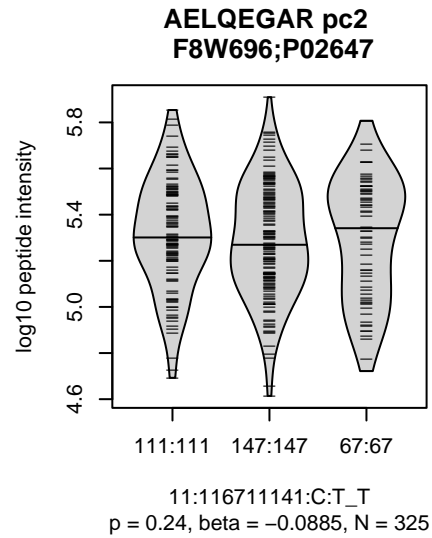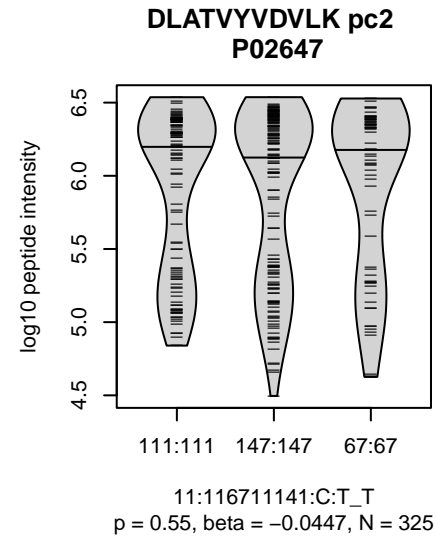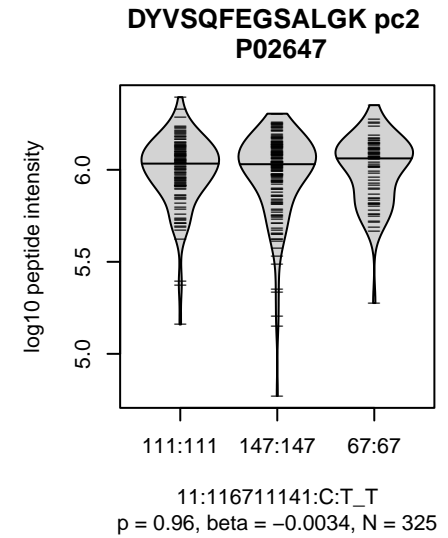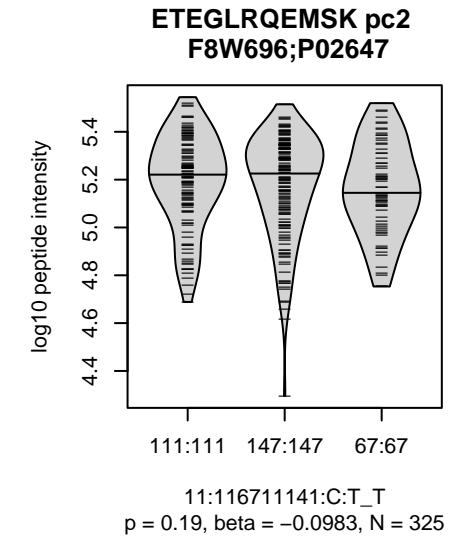

Assay Target: APOA1  
 Olink UniProt: P02647  
 UKB rsID: rs2727784  
 Proxy rsID: rs2727784  
 UKB SNP: 11:116711141:C:T  
 Proxy SNP: 11:116711141:C:T  
 UKB log10(p): 26.5  
 UKB BETA: -0.066  
 -----  
 1259:1259:1259:1259:1259:125

**APP : NP5  
P05067**

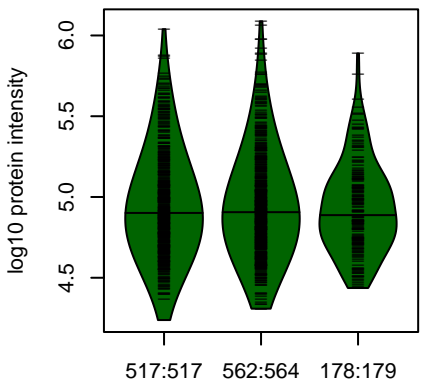

21:27503527:C:A\_C  
p = 0.41, beta = -0.0335, N = 1257

**CLVGEFVSDALLVPDK pc2**

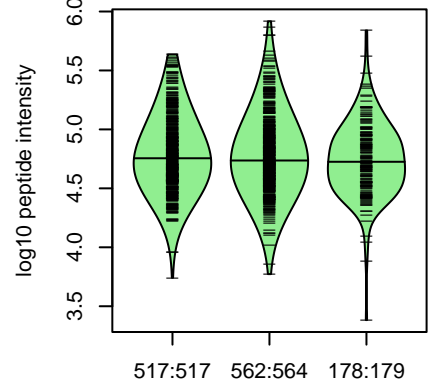

21:27503527:C:A\_C  
p = 0.12, beta = -0.0626, N = 1257

**CAPFFYGGCGGNR pc2**

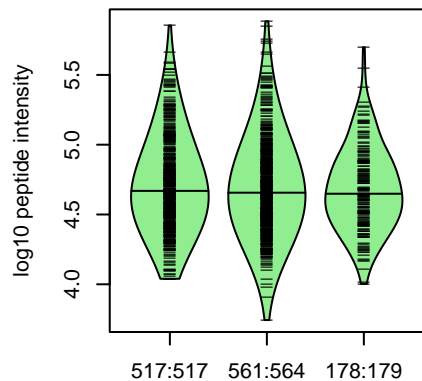

21:27503527:C:A\_C  
p = 0.36, beta = -0.0373, N = 1256

**WYFDVTEGK pc2**

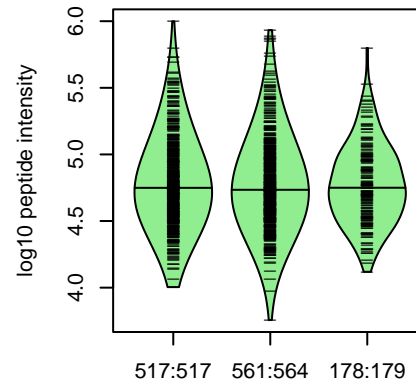

21:27503527:C:A\_C  
p = 0.54, beta = -0.025, N = 1256

**ISYGN DALMPSLTETK pc2**

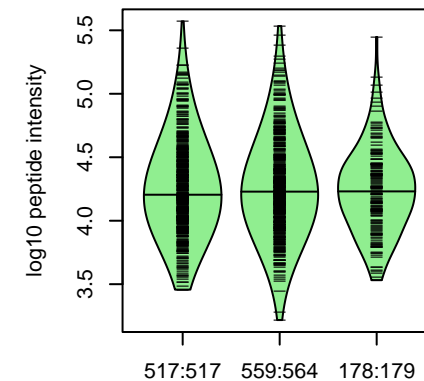

21:27503527:C:A\_C  
p = 0.79, beta = -0.0108, N = 1254

**APP : NP5  
P05067-8**

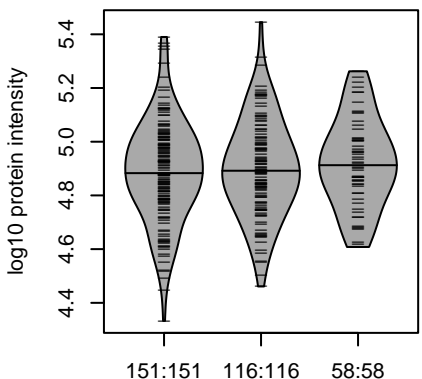

21:27503527:C:A\_C  
p = 0.37, beta = 0.0658, N = 325

**CAPFFYGGCGGNR pc2**

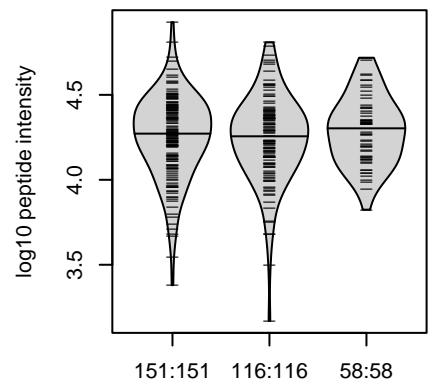

21:27503527:C:A\_C  
p = 0.56, beta = 0.0428, N = 325

**CLVGEFVSDALLVPDK pc2**

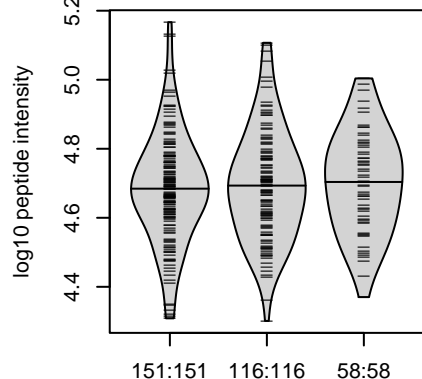

21:27503527:C:A\_C  
p = 0.4, beta = 0.062, N = 325

**ISYGN DALMPSLTETK pc2**

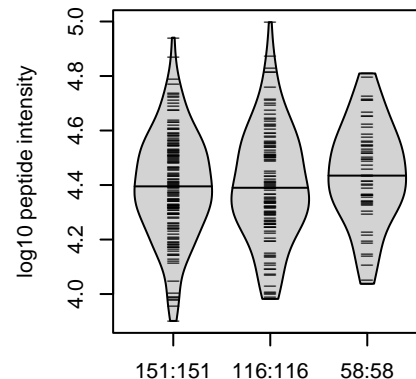

21:27503527:C:A\_C  
p = 0.26, beta = 0.0829, N = 325

**STNLHDYGMLLP CGIDK pc3**

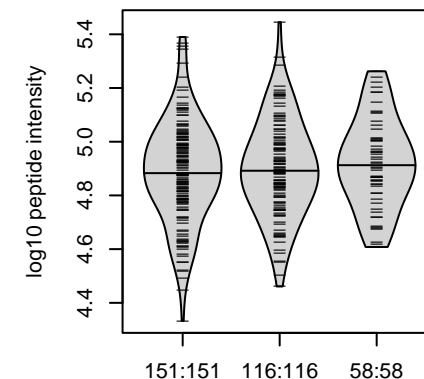

21:27503527:C:A\_C  
p = 0.34, beta = 0.0695, N = 325

**EWEEAER pc2  
rs2076190 ALT**

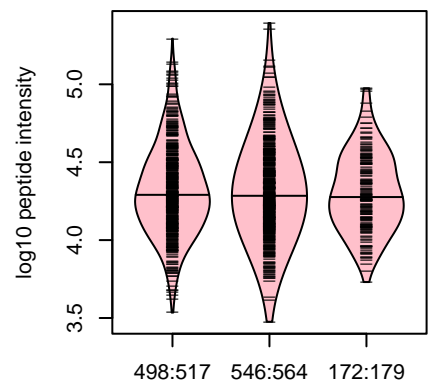

21:27503527:C:A\_C  
p = 0.66, model = DOM, N = 1216

Assay Target: APP  
Olink UniProt: P05067  
UKB rsID: rs8131895  
Proxy rsID: rs8131895  
UKB SNP: 21:27503527:C:A  
Proxy SNP: 21:27503527:C:A  
UKB log10(p): 26.1  
UKB BETA: -0.069  
-----  
1257:1256:1256:1254:1251:125

**MANF : NP3**  
**P55145**

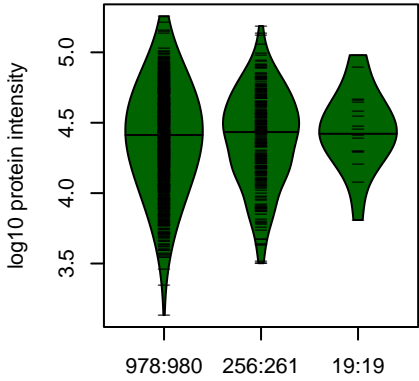

3:51540035:C:A\_C  
p = 0.77, beta = 0.0179, N = 1253

**QIDLSTVDLK pc2**  
**P55145**

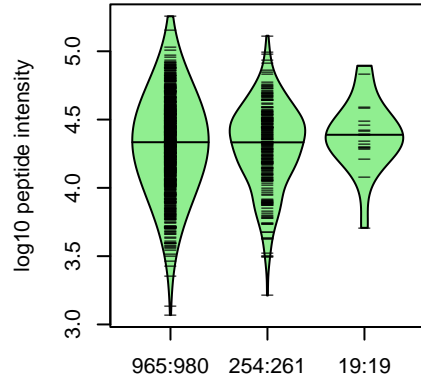

3:51540035:C:A\_C  
p = 0.83, beta = -0.0133, N = 1238

**LCYYIGATDDAATK pc2**  
**P55145**

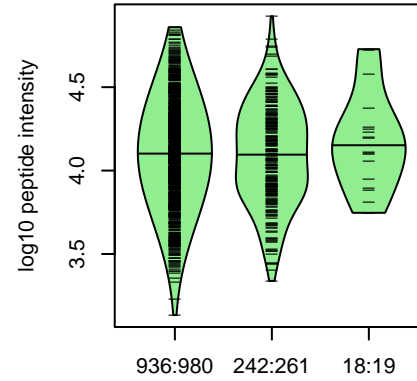

3:51540035:C:A\_C  
p = 0.98, beta = -0.00176, N = 1196

**ILDDWGETCK pc2**  
**P55145**

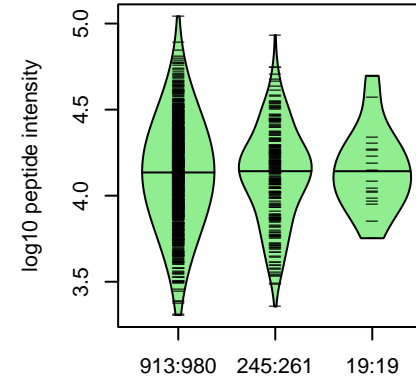

3:51540035:C:A\_C  
p = 0.76, beta = -0.0187, N = 1177

**INELMPK pc2**  
**P55145**

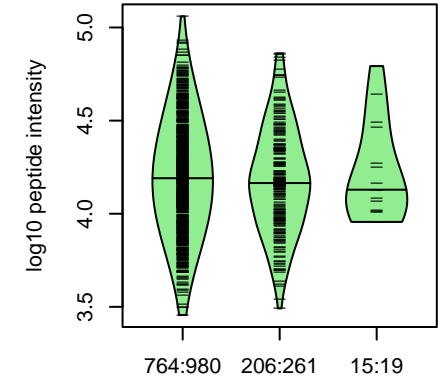

3:51540035:C:A\_C  
p = 0.46, beta = -0.0512, N = 985

**MANF : NP3**  
**P55145**

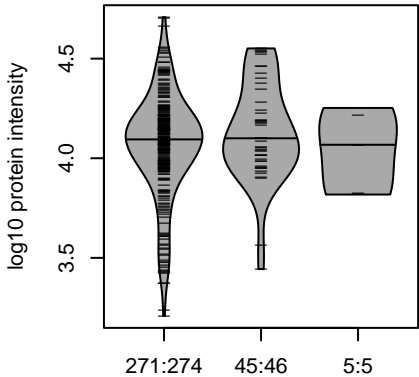

3:51540035:C:A\_C  
p = 0.56, beta = 0.0776, N = 321

**QIDLSTVDLK pc2**  
**P55145**

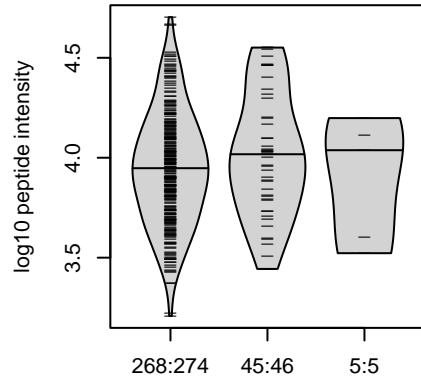

3:51540035:C:A\_C  
p = 0.63, beta = 0.0635, N = 318

**ILDDWGETCK pc2**  
**P55145**

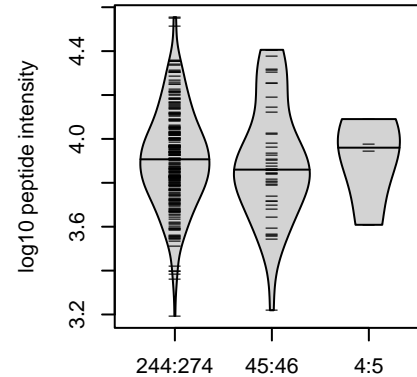

3:51540035:C:A\_C  
p = 0.64, beta = -0.064, N = 293

**INELMPK pc2**  
**P55145**

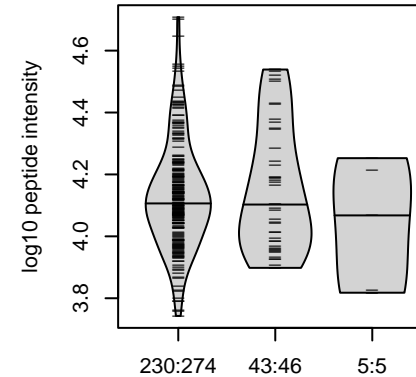

3:51540035:C:A\_C  
p = 0.47, beta = -0.0972, N = 278

**LCYYIGATDDAATK pc2**  
**P55145**

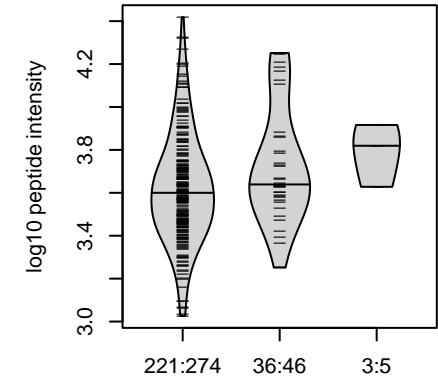

3:51540035:C:A\_C  
p = 0.032, beta = 0.329, N = 260

Assay Target: MANF  
Olink UniProt: P55145  
UKB rsID: rs9311469  
Proxy rsID: rs9311469  
UKB SNP: 3:51540035:C:A  
Proxy SNP: 3:51540035:C:A  
UKB log10(p): 26.1  
UKB BETA: 0.097  
-----NA  
1238:1196:1177:985:764:558:54

**LRRFIP1 : NP4**  
**Q32MZ4-3**

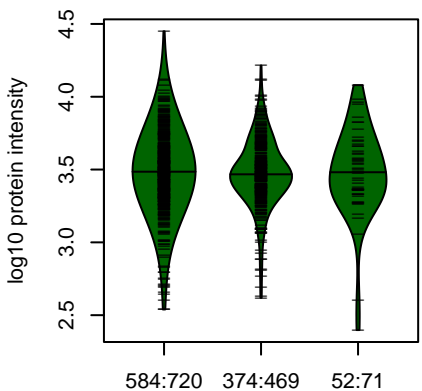

2:238672703:C:G\_G  
p = 0.9, beta = -0.00672, N = 1010

**AMVSNAQLDNEK pc2**  
**Q32MZ4-4;Q9Y608;Q9Y608-2;Q9Y608-3;Q32MZ4;Q32MZ4-2;Q32MZ4-4;Q32MZ4-5**

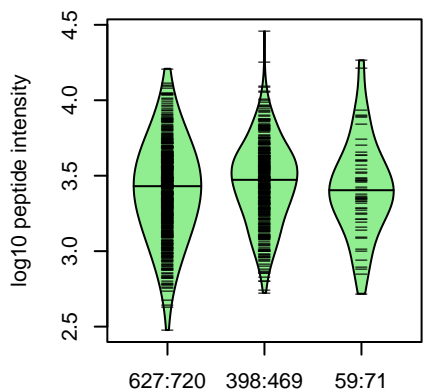

2:238672703:C:G\_G  
p = 0.061, beta = 0.0944, N = 1084

**DMLLEEEQLAESR pc2**

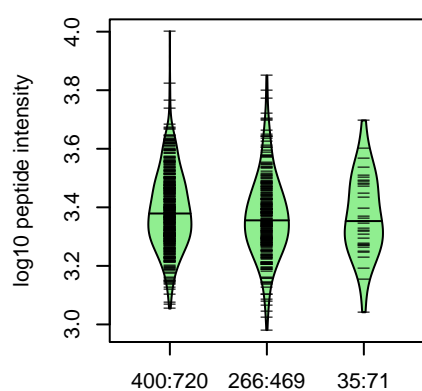

2:238672703:C:G\_G  
p = 0.093, beta = -0.106, N = 701

**AGGEELDEGVAK pc2**  
**Q32MZ4;Q32MZ4-2;Q32MZ4-3**

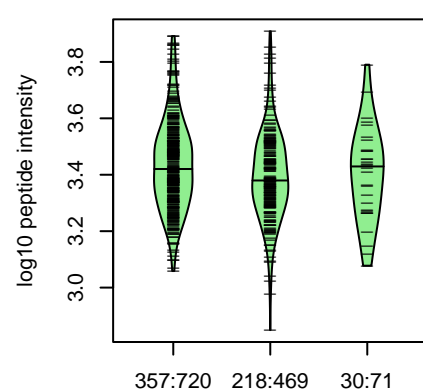

2:238672703:C:G\_G  
p = 0.018, beta = -0.162, N = 605

**SAVEAQNEVTENPK pc2**  
**Q32MZ4;Q32MZ4-2;Q32MZ4-3**

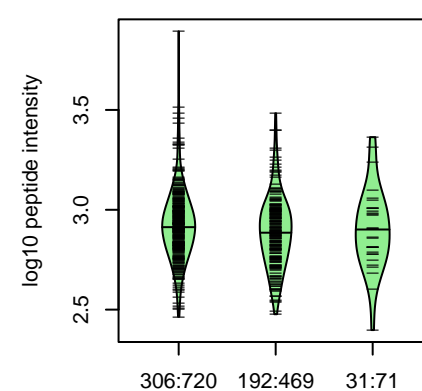

2:238672703:C:G\_G  
p = 0.084, beta = -0.123, N = 529

**LRRFIP1 : NP4**  
**Q32MZ4;Q32MZ4-2;Q32MZ4-3**

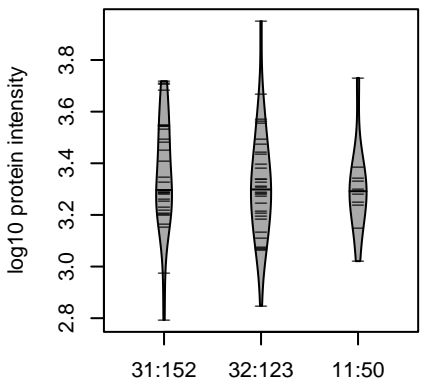

2:238672703:C:G\_G  
p = 0.42, beta = -0.129, N = 74

**SDQQGEALDSSQK pc2**  
**Q32MZ4;Q32MZ4-2;Q32MZ4-3**

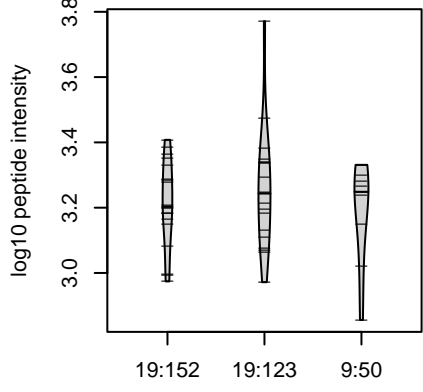

2:238672703:C:G\_G  
p = 0.94, beta = 0.0144, N = 47

**AGGEELDEGVAK pc2**  
**Q32MZ4;Q32MZ4-2;Q32MZ4-3** **AMVSNAQLDNEK pc2**  
**Q32MZ4-4;Q9Y608;Q9Y608-2;Q9Y608-3;Q32MZ4;Q32MZ4-2;Q32MZ4-4;Q32MZ4-5** **TNFMVQVDTLK pc2**

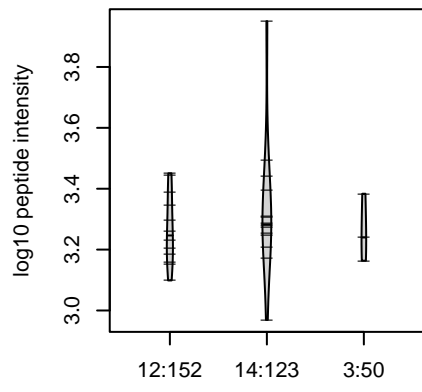

2:238672703:C:G\_G  
p = 0.17, beta = 0.366, N = 29

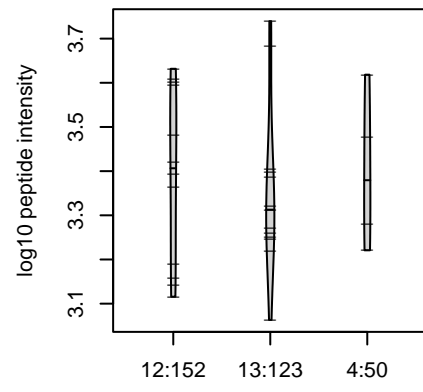

2:238672703:C:G\_G  
p = 0.93, beta = -0.0217, N = 29

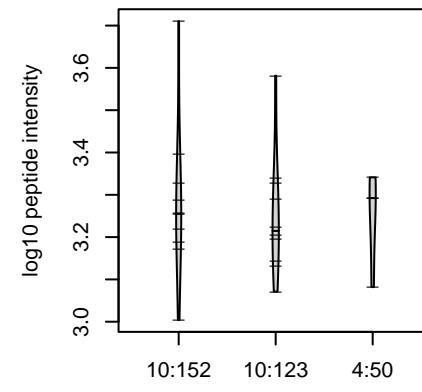

2:238672703:C:G\_G  
p = 0.73, beta = -0.092, N = 24

Assay Target: LRRFIP1  
Olink UniProt: Q32MZ4  
UKB rsID: rs3739038  
Proxy rsID: rs3739038  
UKB SNP: 2:238672703:C:G  
Proxy SNP: 2:238672703:C:G  
UKB log10(p): 25.2  
UKB BETA: -0.074  
-----  
1084:701:605:529:452:418:387:

**PLXDC2 : NP4  
Q6UX71**

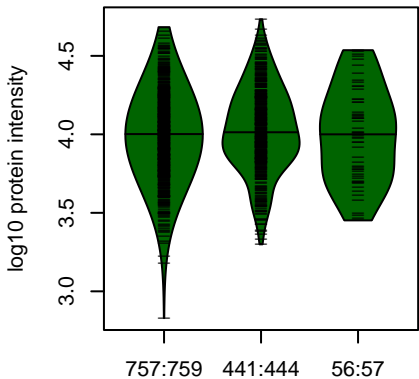

10:20583239:A:C\_C  
p = 0.058, beta = 0.092, N = 1254

**VGLSDAFVVVHR pc3  
Q6UX71;Q6UX71-2**

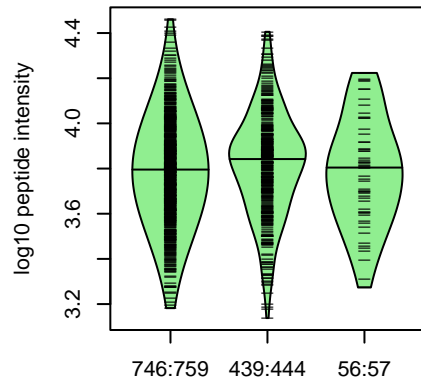

10:20583239:A:C\_C  
p = 0.11, beta = 0.0775, N = 1241

**DLWVNIDQMEK pc2  
Q6UX71**

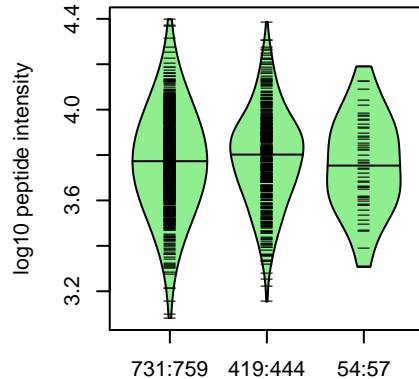

10:20583239:A:C\_C  
p = 0.42, beta = 0.0401, N = 1204

**IYGPSDSASR pc2  
Q6UX71**

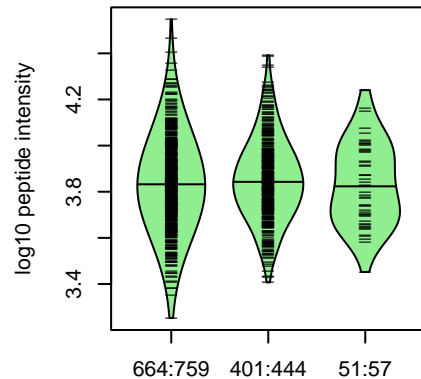

10:20583239:A:C\_C  
p = 0.21, beta = 0.0642, N = 1116

**ASVGQDSPEPR pc2  
Q6UX71;Q6UX71-2**

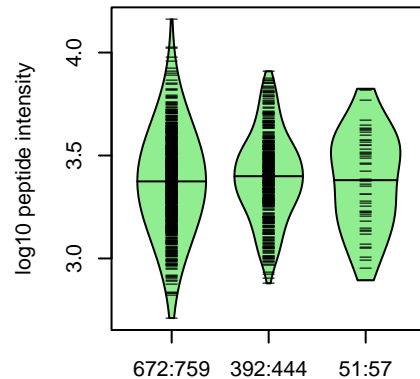

10:20583239:A:C\_C  
p = 0.15, beta = 0.0733, N = 1115

**PLXDC2 : NP4  
Q6UX71**

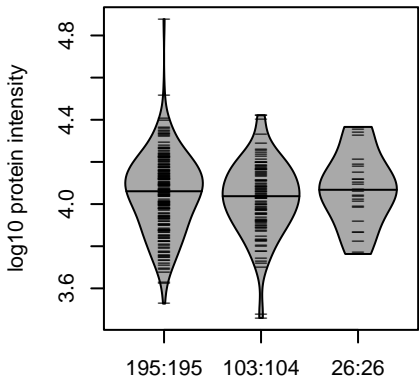

10:20583239:A:C\_C  
p = 0.79, beta = 0.023, N = 324

**VGLSDAFVVVHR pc3  
Q6UX71;Q6UX71-2**

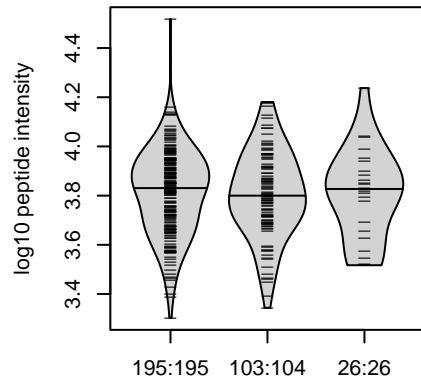

10:20583239:A:C\_C  
p = 0.96, beta = -0.00423, N = 324

**DLWVNIDQMEK pc2  
Q6UX71**

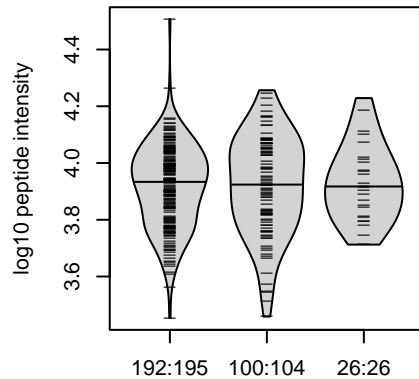

10:20583239:A:C\_C  
p = 0.44, beta = 0.0663, N = 318

**EIPVLVTQISSTNHPVK pc3  
Q6UX71;Q6UX71-2**

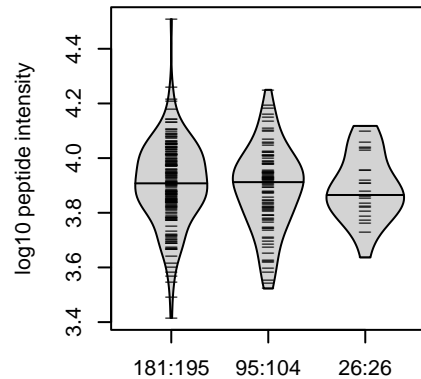

10:20583239:A:C\_C  
p = 0.62, beta = -0.043, N = 302

**IQQIPNVR pc2  
Q6UX71;Q6UX71-2**

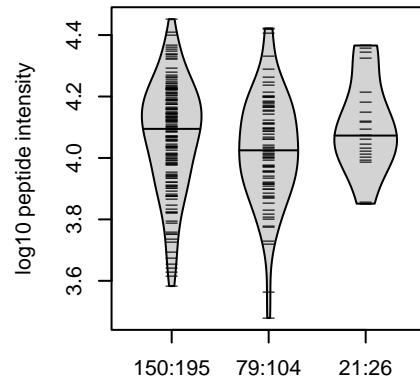

10:20583239:A:C\_C  
p = 0.88, beta = 0.014, N = 250

Assay Target: PLXDC2  
Olink UniProt: Q6UX71  
UKB rsID: rs4748650  
Proxy rsID: rs4748650  
UKB SNP: 10:20583239:A:C  
Proxy SNP: 10:20583239:A:C  
UKB log10(p): 25  
UKB BETA: 0.078  
-----\*-----  
1241:1204:1116:1115:793:720:3

**DBNL : NP2  
Q9UJU6**

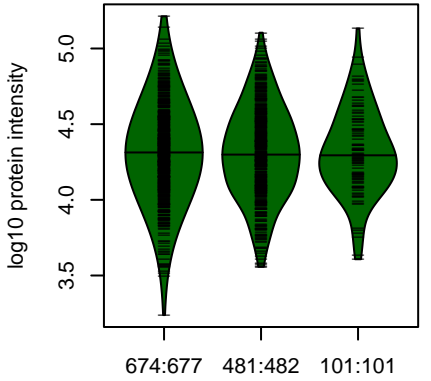

7:44109802:A:G\_G  
p = 0.81, beta = -0.0108, N = 1256

**NGPALQEAYVR pc2  
B2;F8WBG8;F8WC20;F8WCK3;F8WF6;Q9UJU6-2;Q9UJU6-3;Q9UJU6-4;Q6;Q9UJU6-2;Q9UJU6-3;Q9UJU6-4;Q9UJU6;Q9UJU6-2;Q9UJU6-3;Q9UJU6-4**

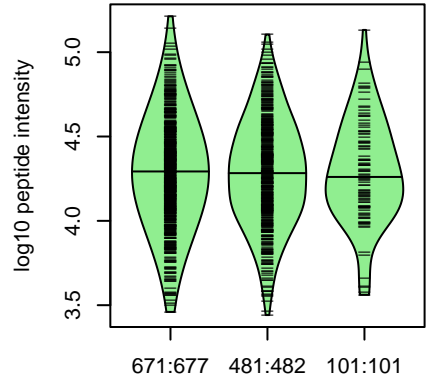

7:44109802:A:G\_G  
p = 0.89, beta = -0.00607, N = 1253

**TWEQQQEVVSR pc2**

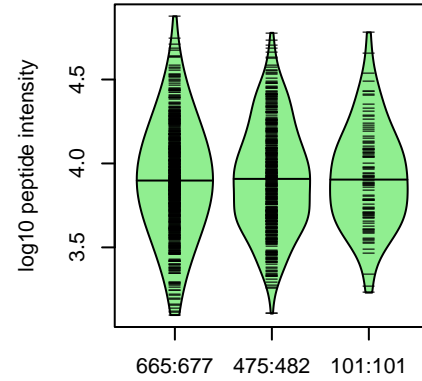

7:44109802:A:G\_G  
p = 0.67, beta = 0.0186, N = 1241

**AMSTTSSSPQPGK pc2**

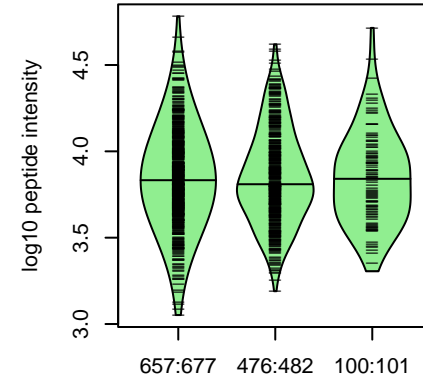

7:44109802:A:G\_G  
p = 0.98, beta = -0.00123, N = 1233

**FQDVGPQAPVGSVYQK pc2**

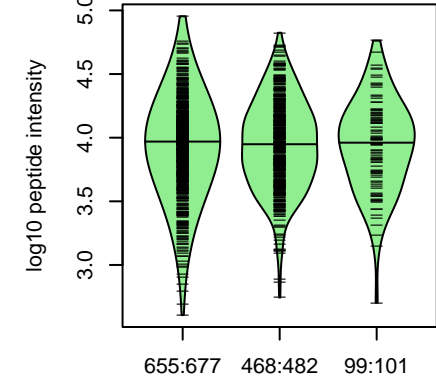

7:44109802:A:G\_G  
p = 0.66, beta = 0.0196, N = 1222

**DBNL : NP2  
Q9UJU6**

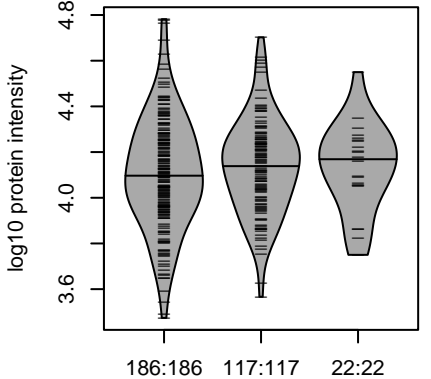

7:44109802:A:G\_G  
p = 0.26, beta = 0.0987, N = 325

**NGPALQEAYVR pc2  
B2;F8WBG8;F8WC20;F8WCK3;F8WFF8WBG8;Q9UJU6;Q9UJU6-2;Q9UJU66;Q9UJU6-2;Q9UJU6-3;Q9UJU6-4;Q9UJU6;Q9UJU6-2;Q9UJU6-3;Q9UJU6-4**

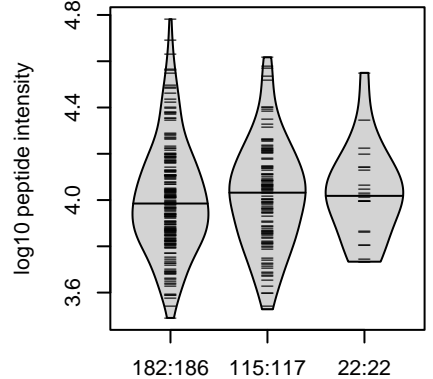

7:44109802:A:G\_G  
p = 0.35, beta = 0.0824, N = 319

**VMYAFCR pc2**

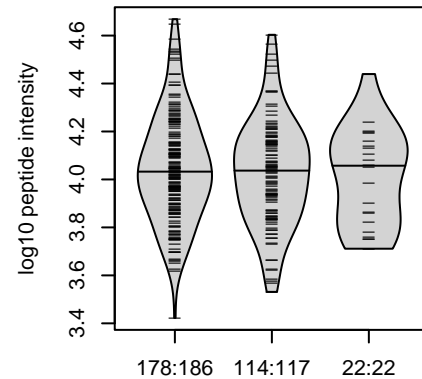

7:44109802:A:G\_G  
p = 0.42, beta = -0.0713, N = 314

**TWEQQQEVVSR pc2**

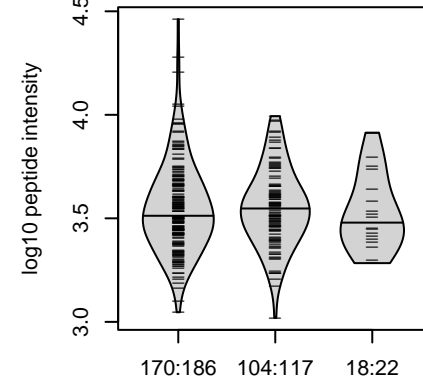

7:44109802:A:G\_G  
p = 0.93, beta = 0.00865, N = 292

**AEEDVEPECIMEK pc2**

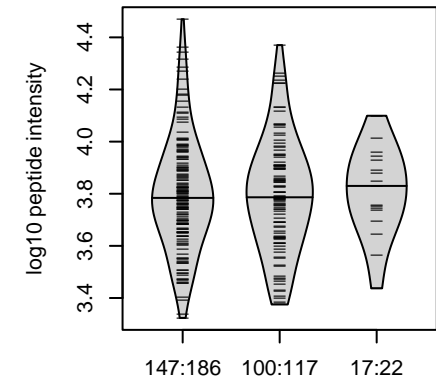

7:44109802:A:G\_G  
p = 0.92, beta = 0.0101, N = 264

Assay Target: DBNL  
Olink UniProt: Q9UJU6  
UKB rsID: rs7799945  
Proxy rsID: rs7799945  
UKB SNP: 7:44109802:A:G  
Proxy SNP: 7:44109802:A:G  
UKB log10(p): 24.9  
UKB BETA: 0.068  
-----  
1253:1241:1233:1222:1182:112



**TWF2 : NP1  
Q6IBS0**

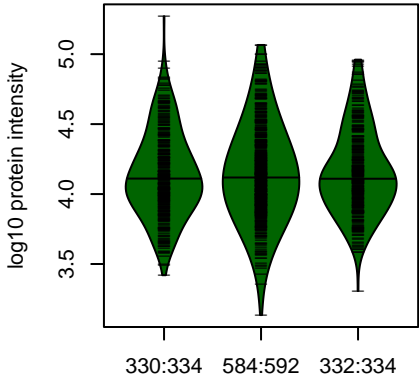

3:52273421:G:A\_A  
p = 0.25, beta = 0.0443, N = 1246

**LLDSVEQDFHLEIAK pc3  
A7I2V2U8;A0A7I2V5B1;A0A7I2V5D3;V2U8;A0A7I2V5B1;A0A7I2V5D3;D6R(V2U8;A0A7I2V5B1;A0A7I2V5D3;D6R(7I2V5B1;A0A7I2V5D3;Q12792;Q12792**

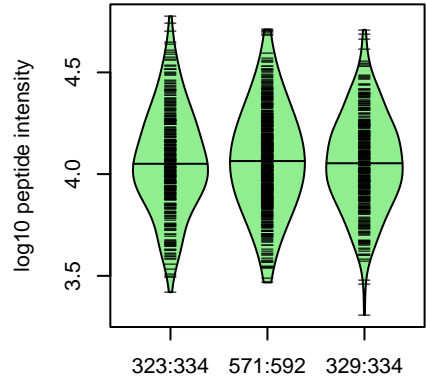

3:52273421:G:A\_A  
p = 0.96, beta = -0.00209, N = 1223

**HLSSCAAPAL TSAER pc3**

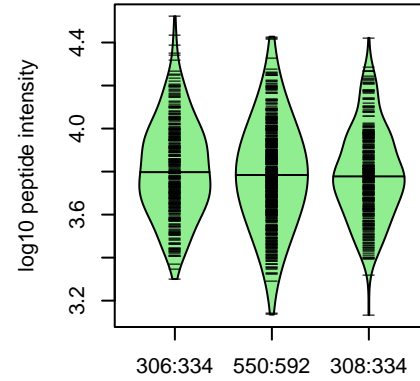

3:52273421:G:A\_A  
p = 0.26, beta = -0.0453, N = 1164

**DELFGTVK pc2**

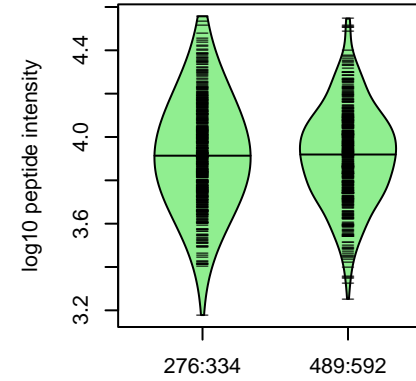

3:52273421:G:A\_A  
p = 0.84, beta = -0.00865, N = 1041

**MLYSSCK pc2**

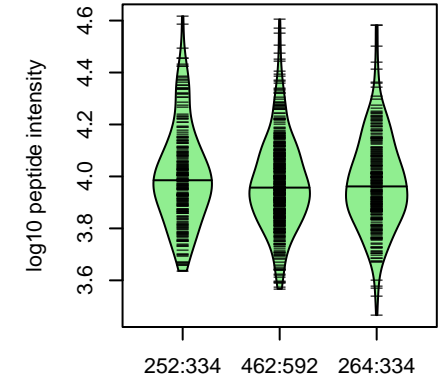

3:52273421:G:A\_A  
p = 0.12, beta = -0.069, N = 978

**TWF2 : NP1  
Q6IBS0**

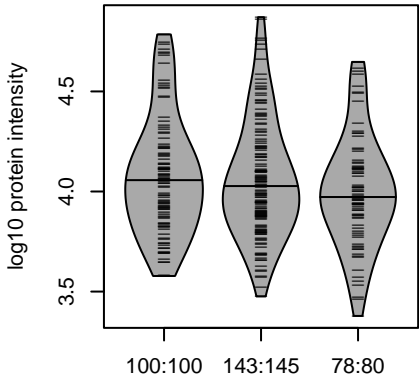

3:52273421:G:A\_G  
p = 0.46, beta = -0.0555, N = 321

**LLDSVEQDFHLEIAK pc3  
A7I2V2U8;A0A7I2V5B1;A0A7I2V5D3;5B1;A0A7I2V5D3;D6RG15;Q12792;Q1V2U8;A0A7I2V5B1;A0A7I2V5D3;D6R(V2U8;A0A7I2V5B1;A0A7I2V5D3;D6R**

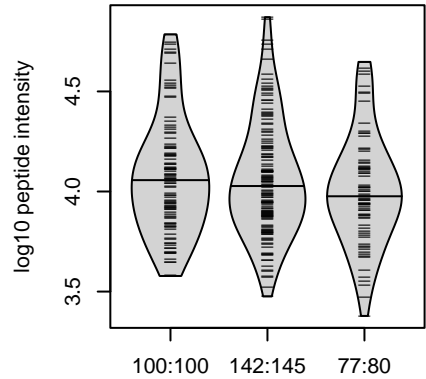

3:52273421:G:A\_G  
p = 0.52, beta = -0.0477, N = 319

**YHFFLYK pc2**

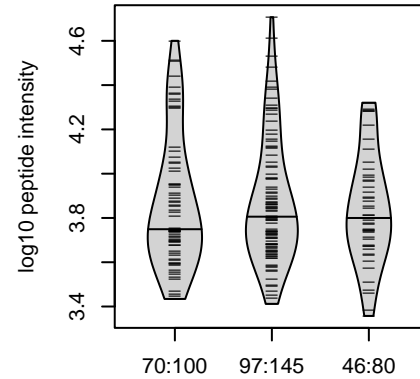

3:52273421:G:A\_G  
p = 0.82, beta = 0.0208, N = 213

**LDLERETIELVHTEPTDVAQLPSR pc**

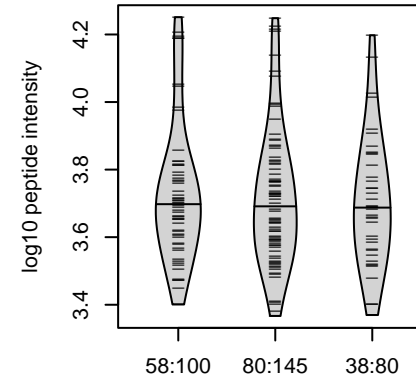

3:52273421:G:A\_G  
p = 0.69, beta = -0.0409, N = 176

**DELFGTVK pc2**

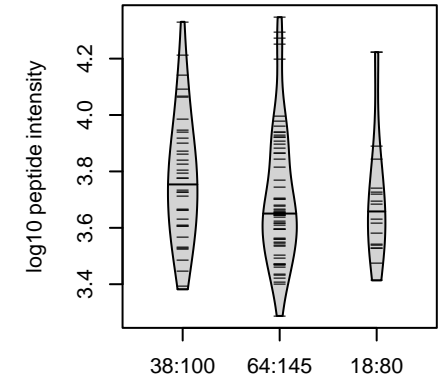

3:52273421:G:A\_G  
p = 0.51, beta = -0.0892, N = 120

Assay Target: TWF2  
Olink UniProt: Q6IBS0  
UKB rsID: rs610060  
Proxy rsID: rs610060  
UKB SNP: 3:52273421:G:A  
Proxy SNP: 3:52273421:G:A  
UKB log10(p): 24.8  
UKB BETA: -0.064  
-----  
1223:1164:1041:978:927:915:80

**VGF : NP2**  
**O15240**

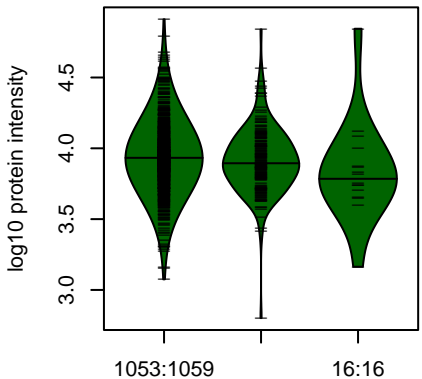

7:100817901:A:G\_G  
p = 0.021, beta = -0.159, N = 1251

**GLQEAEEER pc2**  
**O15240**

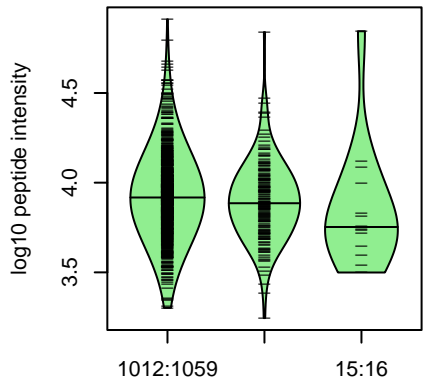

7:100817901:A:G\_G  
p = 0.022, beta = -0.163, N = 1197

**LADLASDLLLQYLLQGGR pc3**  
**O15240**

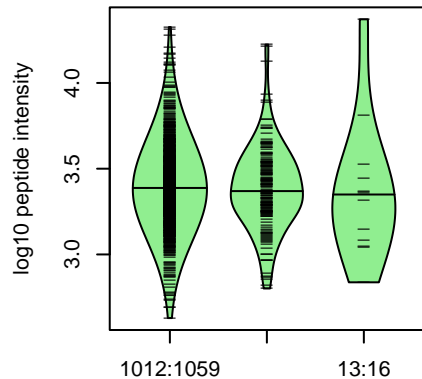

7:100817901:A:G\_G  
p = 0.21, beta = -0.0904, N = 1197

**THLGEALAPLSK pc2**  
**O15240**

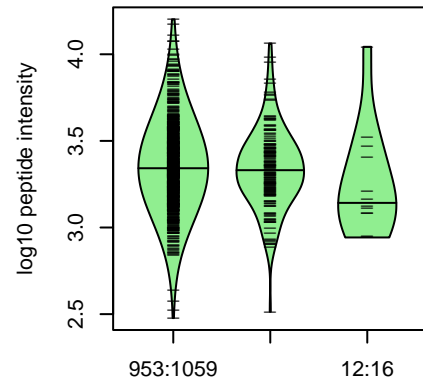

7:100817901:A:G\_G  
p = 0.057, beta = -0.142, N = 1126

**VNLESPGPER pc2**  
**O15240**

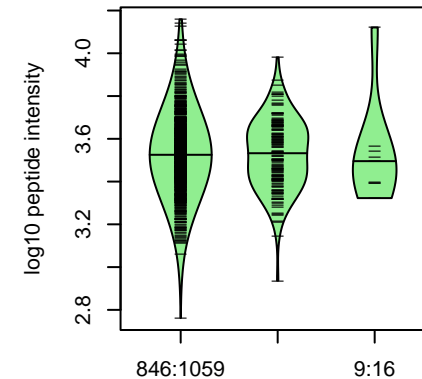

7:100817901:A:G\_G  
p = 0.6, beta = -0.0423, N = 1001

**VGF : NP2**  
**O15240**

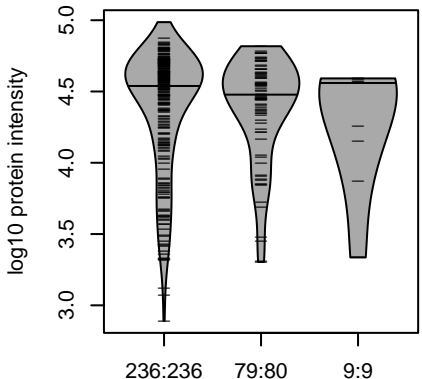

7:100817901:A:G\_G  
p = 0.23, beta = -0.129, N = 324

**LADLASDLLLQYLLQGGR pc3**  
**O15240**

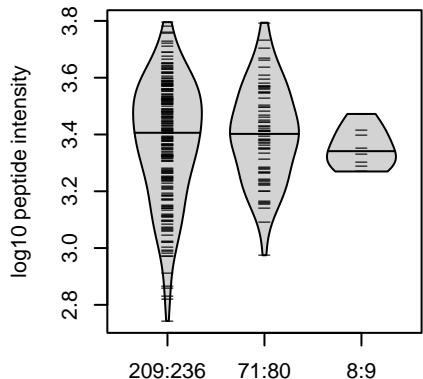

7:100817901:A:G\_G  
p = 0.78, beta = 0.0318, N = 288

**VNLESPGPER pc2**  
**O15240**

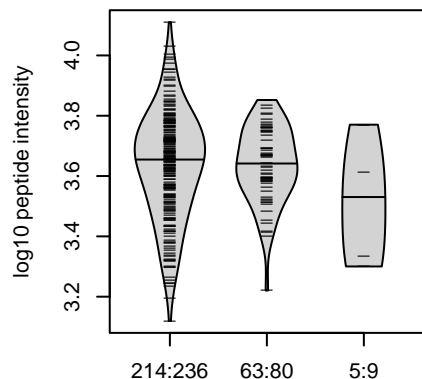

7:100817901:A:G\_G  
p = 0.24, beta = -0.145, N = 282

**LLQGLAQVEAGR pc2**  
**O15240**

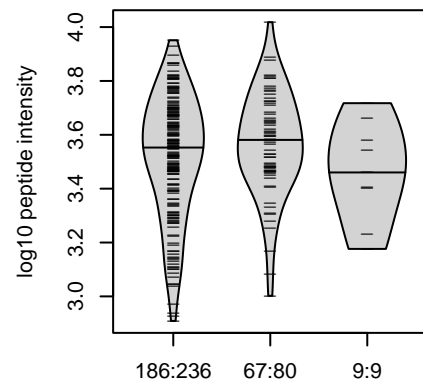

7:100817901:A:G\_G  
p = 0.76, beta = 0.0354, N = 262

**THLGEALAPLSK pc2**  
**O15240**

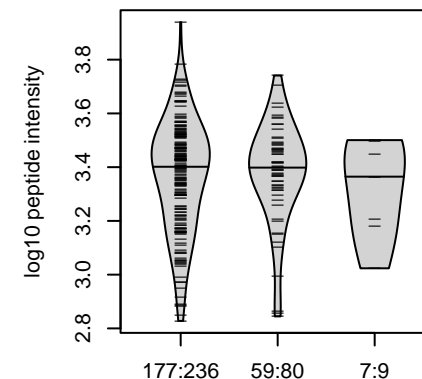

7:100817901:A:G\_G  
p = 0.61, beta = -0.0618, N = 243

Assay Target: VGF  
Olink UniProt: O15240  
UKB rsID: rs34985488  
Proxy rsID: rs34985488  
UKB SNP: 7:100817901:A:G  
Proxy SNP: 7:100817901:A:G  
UKB log10(p): 24.5  
UKB BETA: -0.115  
-----\*-----  
1197:1197:1126:1001:988:955:8

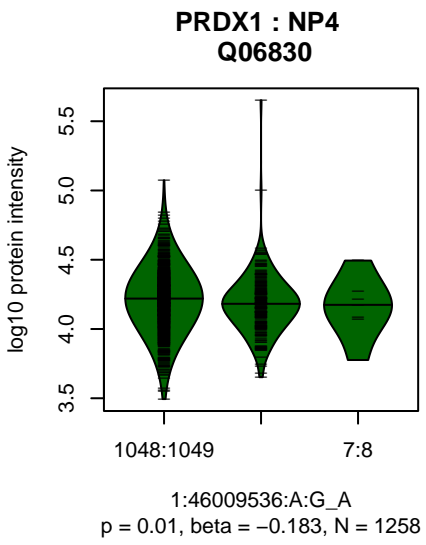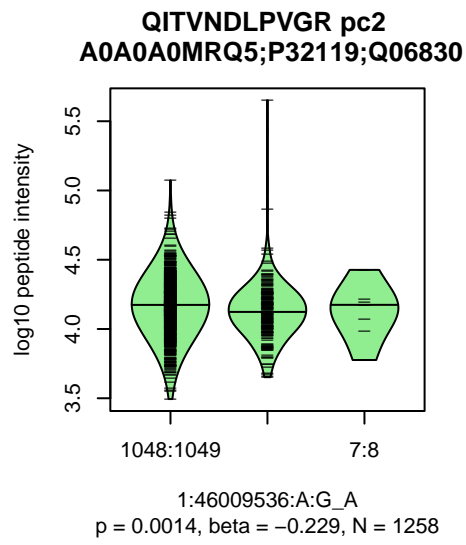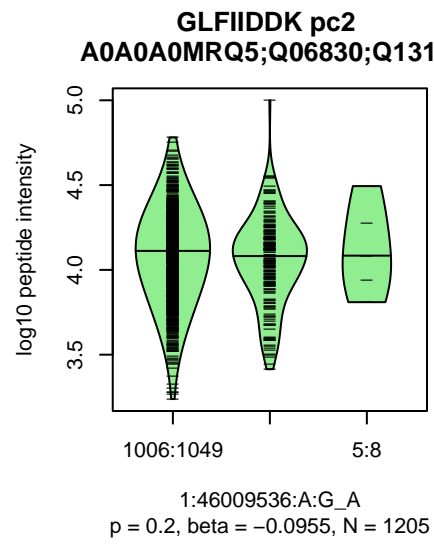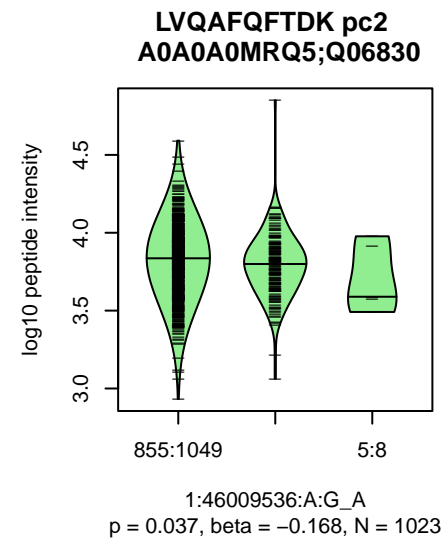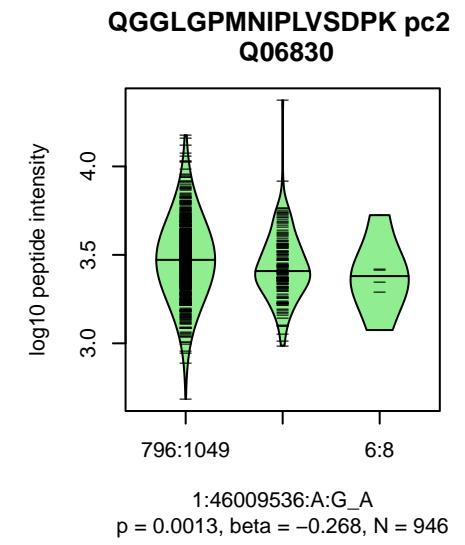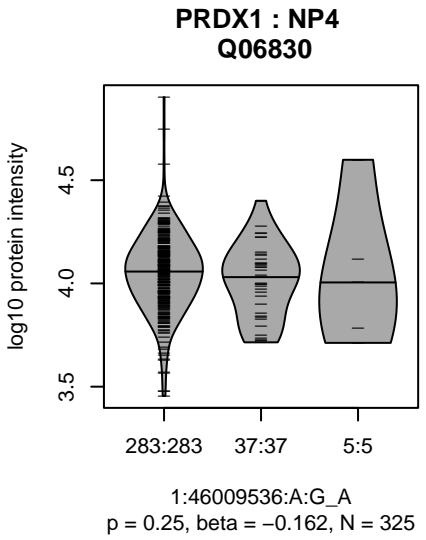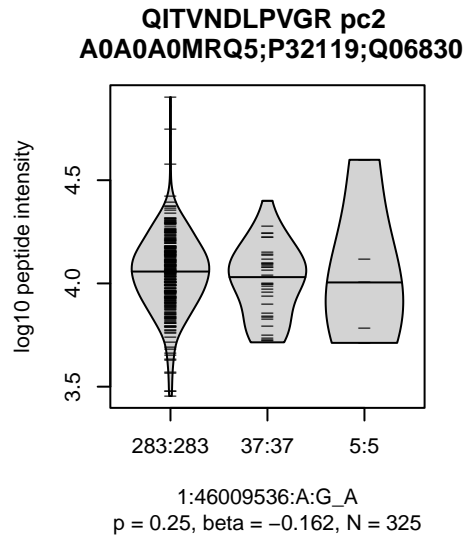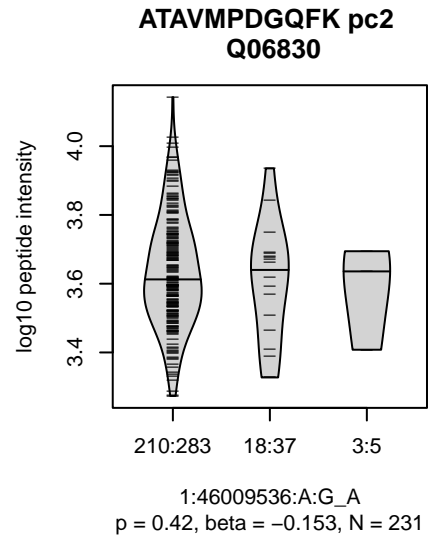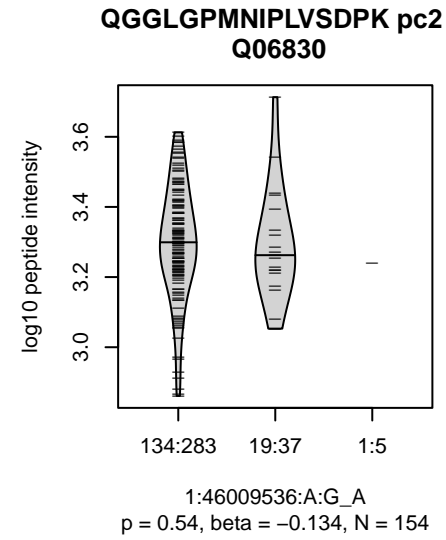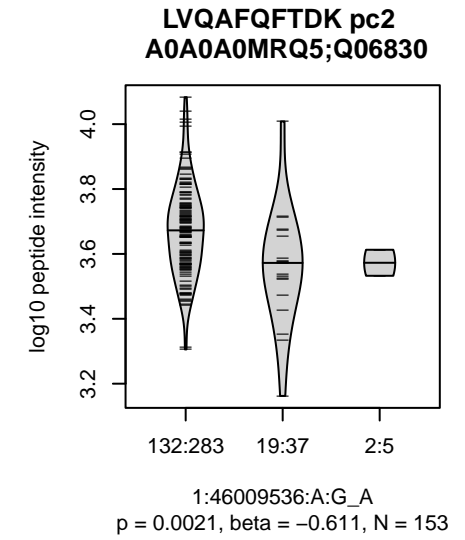

Assay Target: PRDX1  
 Olink UniProt: Q06830  
 UKB rsID: rs487174  
 Proxy rsID: rs487174  
 UKB SNP: 1:46009536:A:G  
 Proxy SNP: 1:46009536:A:G  
 UKB log10(p): 22.1  
 UKB BETA: 0.102  
 \*.-.-.\*.\*.\*.\*.-.-.-.-  
 1258:1205:1023:946:934:733:7

**SLC4A1 : NP4  
P02730**

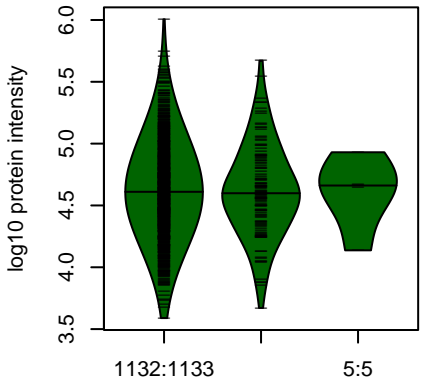

17:42338453:G:A\_A  
p = 0.74, beta = -0.0289, N = 1259

**ADFLEQPVLGFVR pc2  
A0A0A0MS98;P02730**

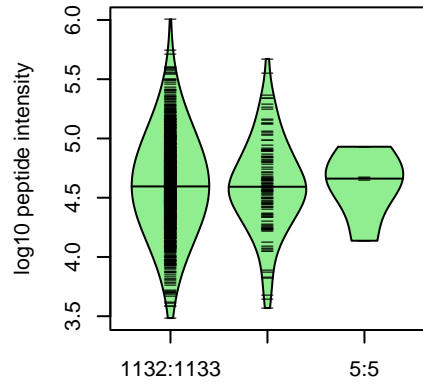

17:42338453:G:A\_A  
p = 0.81, beta = -0.0207, N = 1259

**VLLPLIFR pc2  
A0A0A0MS98;P02730**

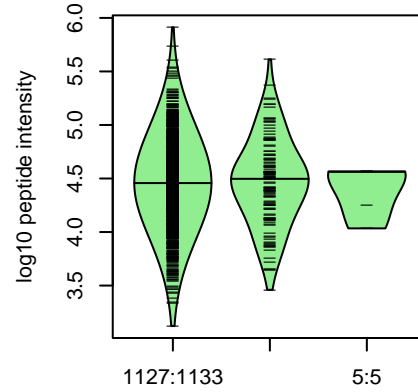

17:42338453:G:A\_A  
p = 0.91, beta = 0.00989, N = 1254

**LSVPDGFK pc2  
A0A0A0MS98;P02730**

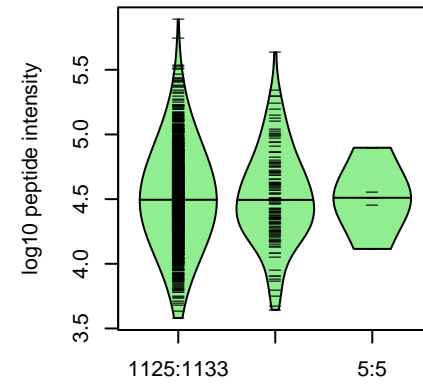

17:42338453:G:A\_A  
p = 0.98, beta = 0.00204, N = 1252

**ASTPGAAAQIQEVK pc2  
A0A0A0MS98;P02730**

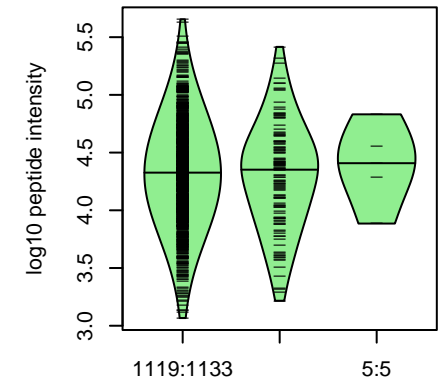

17:42338453:G:A\_A  
p = 0.56, beta = -0.0521, N = 1245

**SLC4A1 : NP4  
P02730**

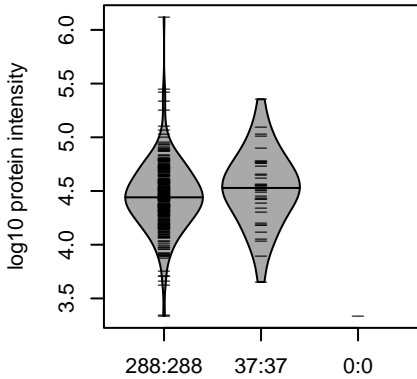

17:42338453:G:A\_A  
p = 0.29, beta = 0.182, N = 325

**ADFLEQPVLGFVR pc2  
A0A0A0MS98;P02730**

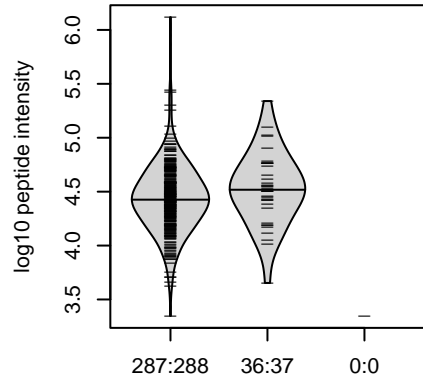

17:42338453:G:A\_A  
p = 0.17, beta = 0.241, N = 323

**ASTPGAAAQIQEVK pc2  
A0A0A0MS98;P02730**

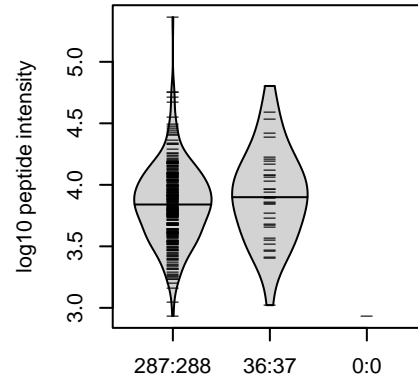

17:42338453:G:A\_A  
p = 0.5, beta = 0.117, N = 323

**LSVPDGFK pc2  
A0A0A0MS98;P02730**

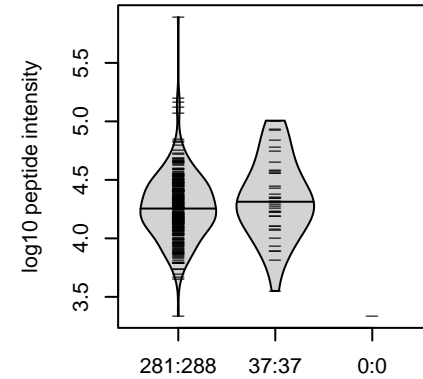

17:42338453:G:A\_A  
p = 0.39, beta = 0.149, N = 318

**LQEAEELEAVLPVPIR pc2  
P02730**

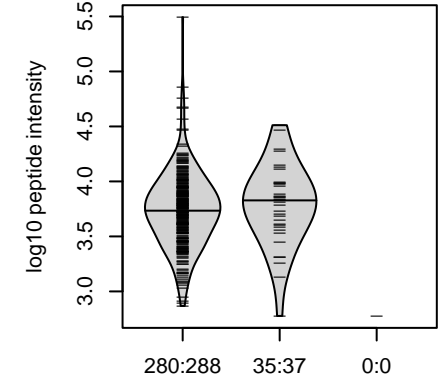

17:42338453:G:A\_A  
p = 0.52, beta = 0.114, N = 315

Assay Target: SLC4A1  
Olink UniProt: P02730  
UKB rsID: rs5035  
Proxy rsID: rs45574837  
UKB SNP: 17:42338998:T:G  
Proxy SNP: 17:42338453:G:A  
UKB log10(p): 21.9  
UKB BETA: -0.146  
-----  
1259:1254:1252:1245:1222:121

**ANXA11 : NP1**  
**P50995;P50995-2**

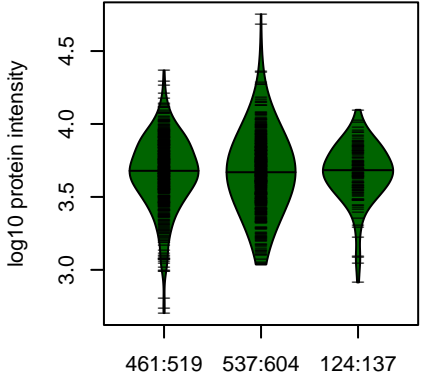

10:81919800:T:C\_T  
p = 0.57, beta = -0.0257, N = 1122

**TPVLFDIYEIK pc2**  
**P50995-2;P50995**

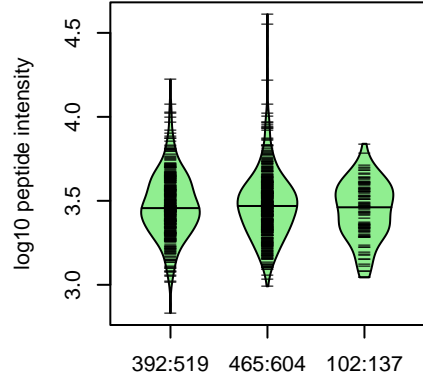

10:81919800:T:C\_T  
p = 0.22, beta = -0.0599, N = 959

**NTPAFFAER pc2**  
**P50995-2;P50995**

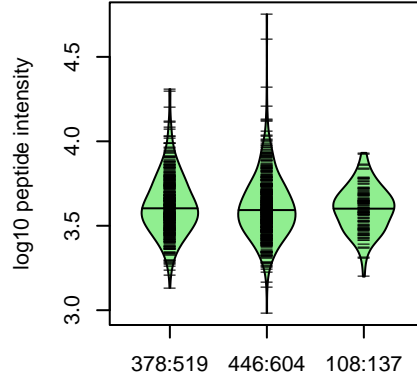

10:81919800:T:C\_T  
p = 0.16, beta = -0.0698, N = 932

**SETDLLDIR pc2**  
**P50995-2;P50995**

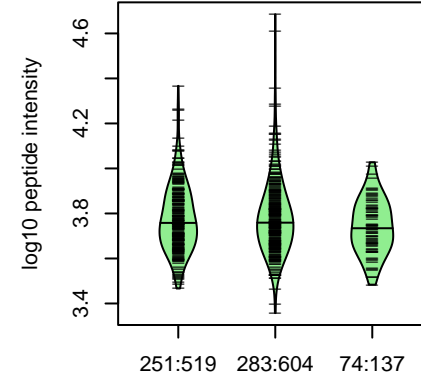

10:81919800:T:C\_T  
p = 0.076, beta = -0.106, N = 608

**GVGTEACLIEILASR pc2**  
**P50995-2;P50995**

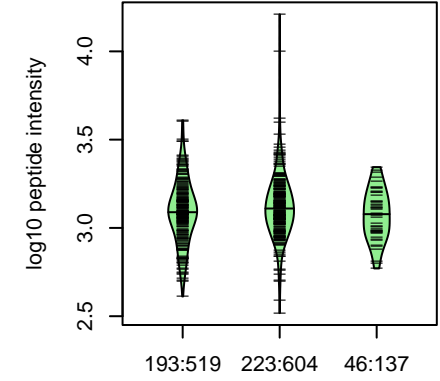

10:81919800:T:C\_T  
p = 0.79, beta = 0.0188, N = 462

**ANXA11 : NP1**  
**P50995;P50995-2**

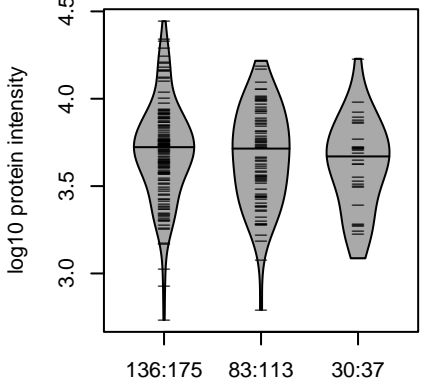

10:81919800:T:C\_T  
p = 0.34, beta = -0.0853, N = 249

**TPVLFDIYEIK pc2**  
**P50995-2;P50995**

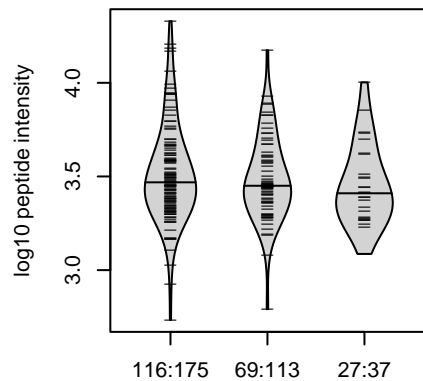

10:81919800:T:C\_T  
p = 0.36, beta = -0.0876, N = 212

**NTPAFFAER pc2**  
**P50995-2;P50995**

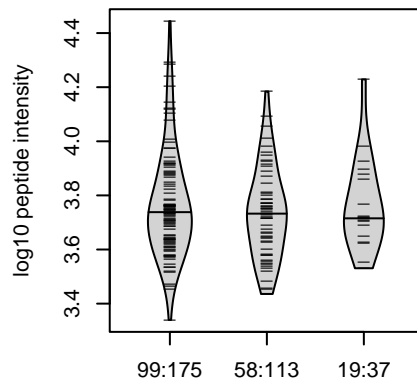

10:81919800:T:C\_T  
p = 0.87, beta = -0.0172, N = 176

**QQILLSFK pc2**  
**P50995-2;P50995**

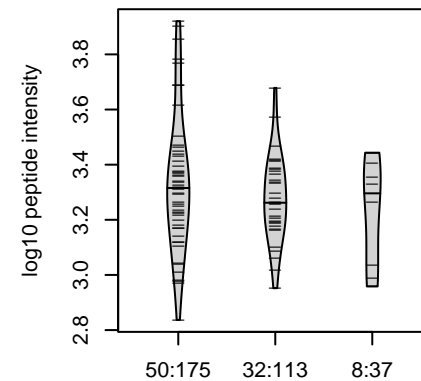

10:81919800:T:C\_T  
p = 0.6, beta = -0.083, N = 90

**SETDLLDIR pc2**  
**P50995-2;P50995**

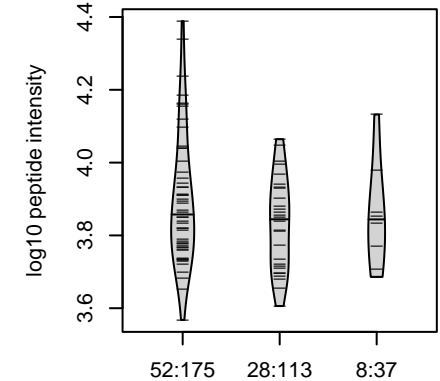

10:81919800:T:C\_T  
p = 0.64, beta = -0.0745, N = 88

**GFGTDEQAIDCLGSR pc2**  
**rs1049550 REF**

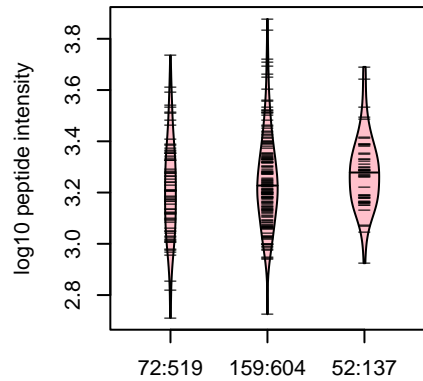

10:81919800:T:C\_T  
p = 5.3e-10, model = REC, N = 283

Assay Target: ANXA11  
Olink UniProt: P50995  
UKB rsID: rs2784773  
Proxy rsID: rs2784773  
UKB SNP: 10:81919800:T:C  
Proxy SNP: 10:81919800:T:C  
UKB log10(p): 21.8  
UKB BETA: 0.063  
-----  
959:932:608:462:427:401:378:2

**PRDX3 : NP4  
P30048**

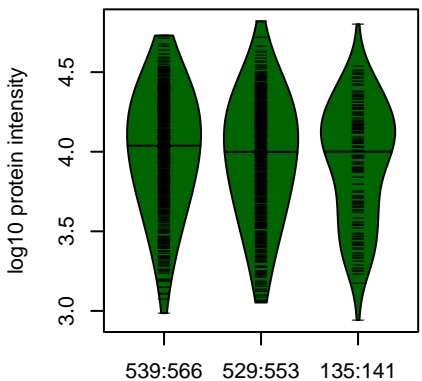

10:120956172:G:A\_A  
p = 0.009, beta = -0.112, N = 1203

**GLFIIDPNGVIK pc2  
P30048**

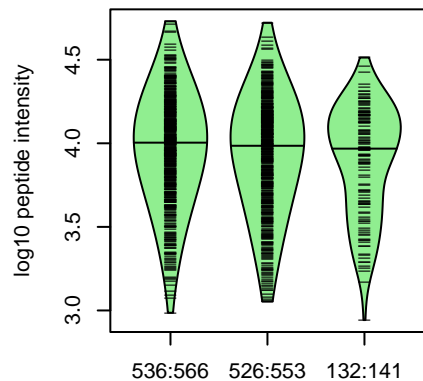

10:120956172:G:A\_A  
p = 0.0074, beta = -0.115, N = 1194

**DYGVLLGSGALR pc2  
P30048**

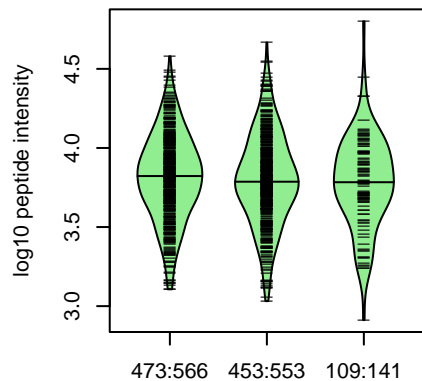

10:120956172:G:A\_A  
p = 0.24, beta = -0.0554, N = 1035

**HLSVNDLPVGR pc2  
P30048**

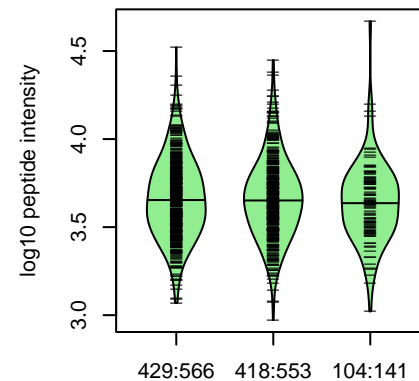

10:120956172:G:A\_A  
p = 0.37, beta = -0.0436, N = 951

**NGGLGHMNIALLSDLTK pc3  
P30048**

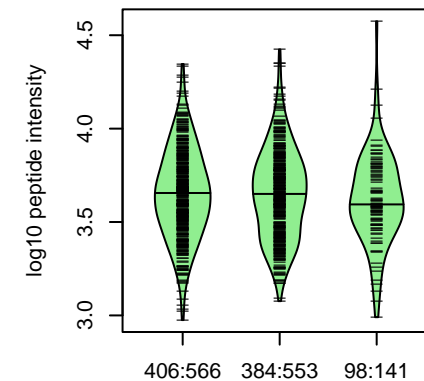

10:120956172:G:A\_A  
p = 0.36, beta = -0.0461, N = 888

**PRDX3 : NP4  
P30048**

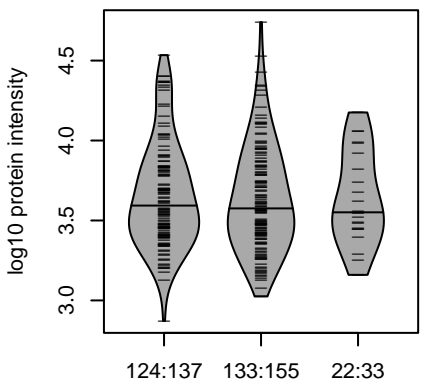

10:120956172:G:A\_A  
p = 0.57, beta = -0.0533, N = 279

**GLFIIDPNGVIK pc2  
P30048**

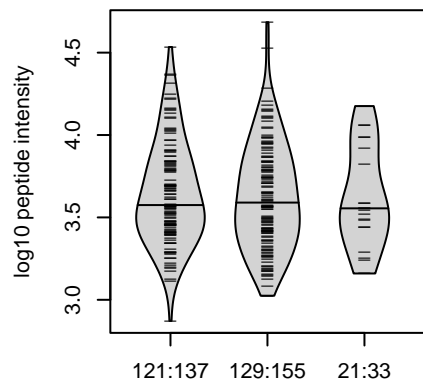

10:120956172:G:A\_A  
p = 0.54, beta = -0.0583, N = 271

**HLSVNDLPVGR pc2  
P30048**

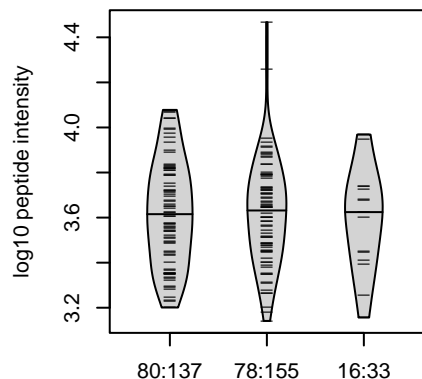

10:120956172:G:A\_A  
p = 0.64, beta = -0.0533, N = 174

**DYGVLLGSGALR pc2  
P30048**

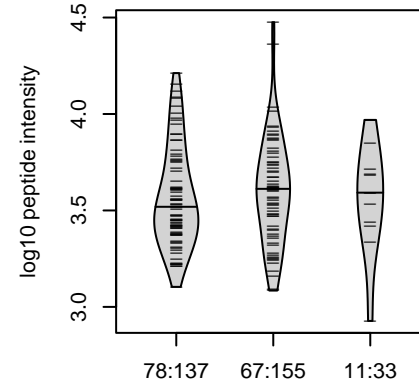

10:120956172:G:A\_A  
p = 0.65, beta = 0.0576, N = 156

**NGGLGHMNIALLSDLTK pc3  
P30048**

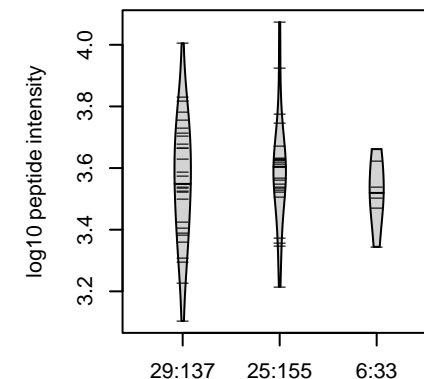

10:120956172:G:A\_A  
p = 0.97, beta = 0.00602, N = 60

Assay Target: PRDX3  
Olink UniProt: P30048  
UKB rsID: rs747334131  
Proxy rsID: rs7068698  
UKB SNP: 10:120953662:TCTG  
Proxy SNP: 10:120956172:G:A  
UKB log10(p): 21.5  
UKB BETA: -0.065  
\*:---:---:---:---:---  
1194:1035:951:888:501:467:32

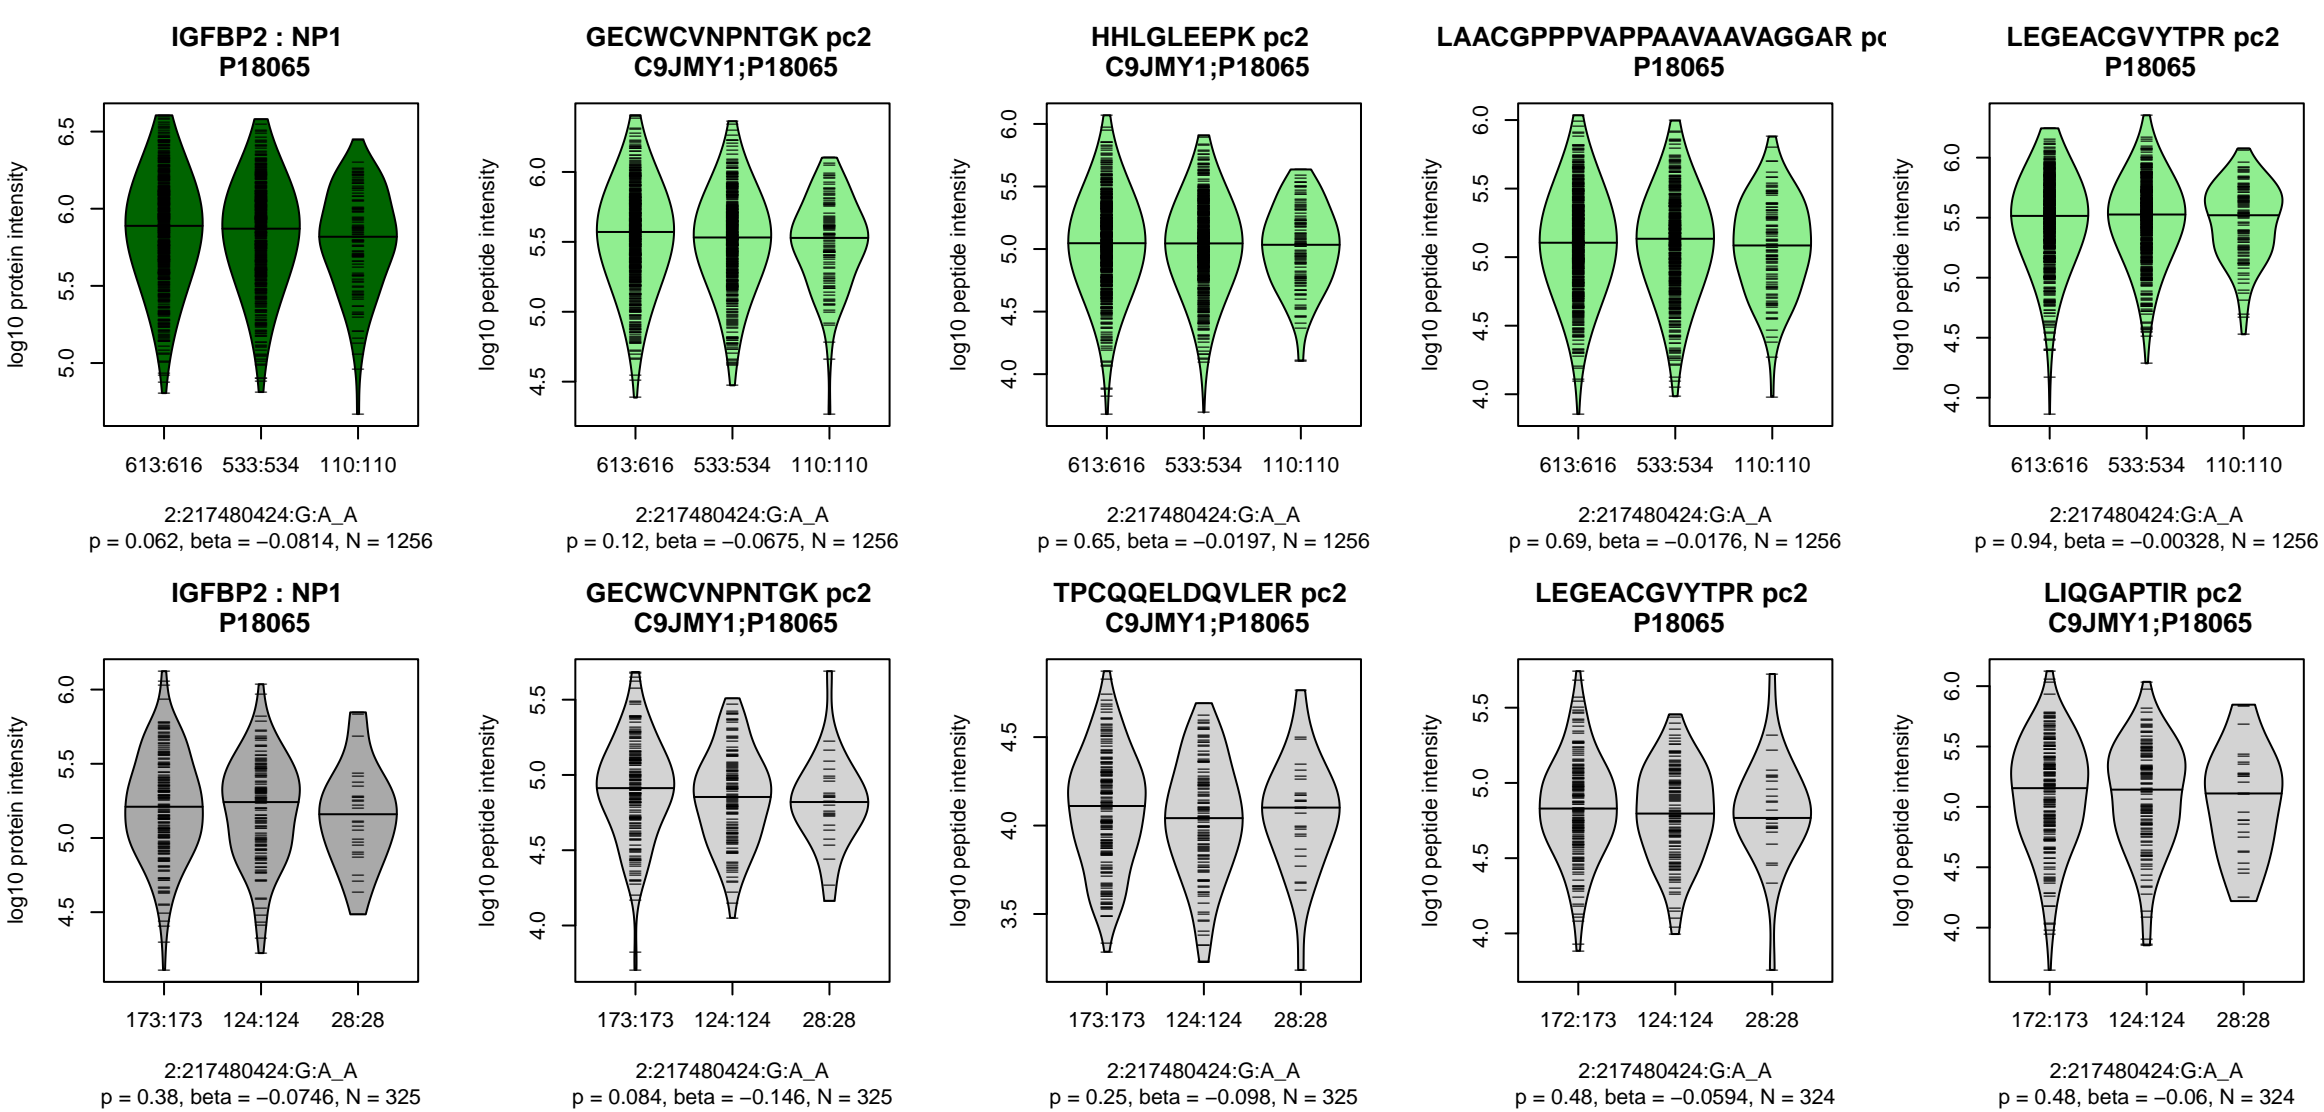

Assay Target: IGFBP2  
 Olink UniProt: P18065  
 UKB rsID: rs4674100  
 Proxy rsID: rs4674100  
 UKB SNP: 2:217480424:G:A  
 Proxy SNP: 2:217480424:G:A  
 UKB log<sub>10</sub>(p): 21.2  
 UKB BETA: -0.066  
 -----  
 1256:1256:1256:1256:1255:125

**PGA4 : NP2**  
**P0DJD7;P0DJD8;P0DJD9**

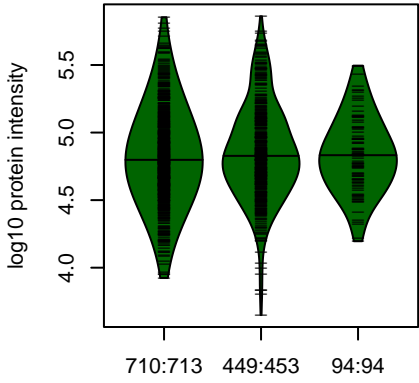

11:60972512:C:T\_T  
 p = 0.11, beta = 0.0716, N = 1253

**QYFTVFDR pc2**  
**5GWT0;F5GXL4;F5H0H6;P0DJD8;P0DJD9**

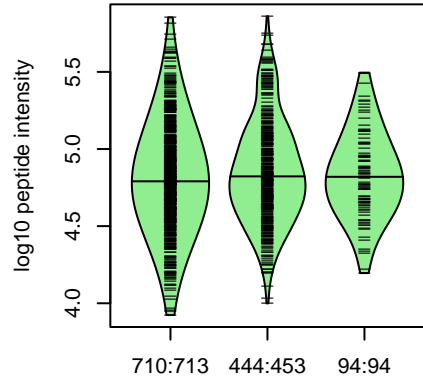

11:60972512:C:T\_T  
 p = 0.053, beta = 0.0862, N = 1248

**HNLNPAR pc2**  
**P0DJD8;P0DJD9;P0DJD7**

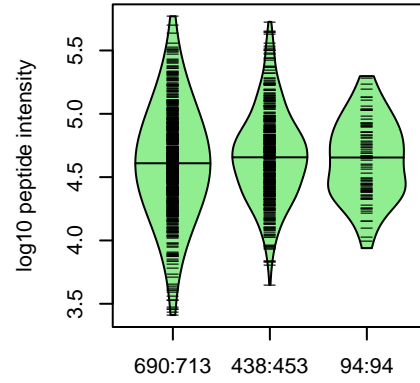

11:60972512:C:T\_T  
 p = 0.038, beta = 0.0929, N = 1222

**PGA4 : NP2**  
**P0DJD7;P0DJD8;P0DJD9**

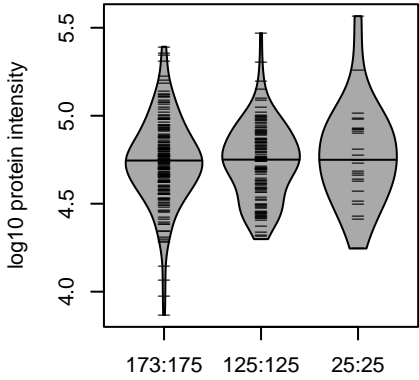

11:60972512:C:T\_T  
 p = 0.56, beta = 0.0506, N = 323

**QYFTVFDR pc2**  
**5GWT0;F5GXL4;F5H0H6;P0DJD8;P0DJD9**

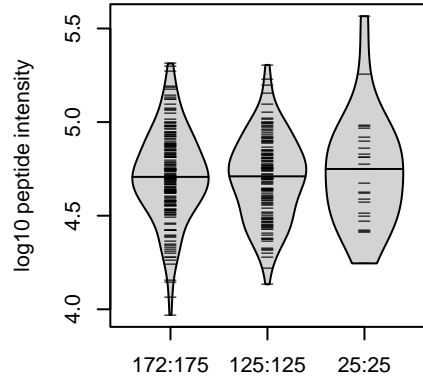

11:60972512:C:T\_T  
 p = 0.76, beta = 0.0269, N = 322

**HNLNPAR pc2**  
**P0DJD8;P0DJD9;P0DJD7**

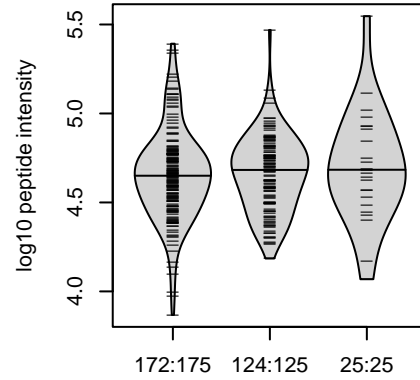

11:60972512:C:T\_T  
 p = 0.28, beta = 0.0931, N = 321

Assay Target: PGA4  
 Olink UniProt: P0DJD7  
 UKB rsID: rs4414241  
 Proxy rsID: rs4414241  
 UKB SNP: 11:60972512:C:T  
 Proxy SNP: 11:60972512:C:T  
 UKB log10(p): 21  
 UKB BETA: 0.075  
 -:  
 1248:1222





**CD74 : NP2  
P04233-2**

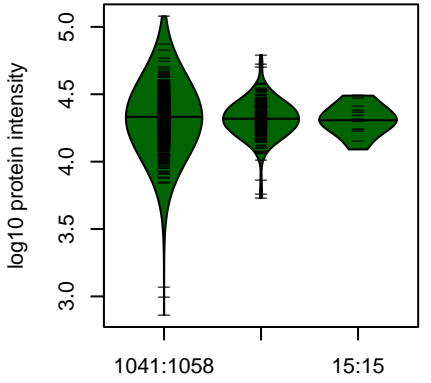

5:149792337:C:T\_T  
p = 0.46, beta = -0.0508, N = 1239

**NTMETIDWK pc2  
P04233;P04233-2**

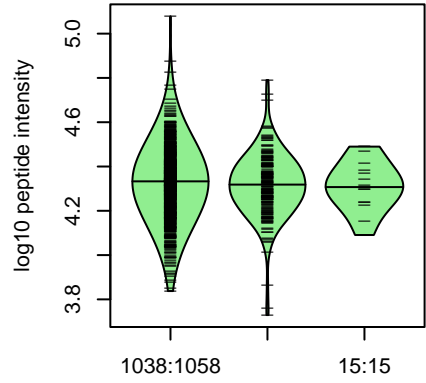

5:149792337:C:T\_T  
p = 0.45, beta = -0.0526, N = 1236

**ESLELEDPSSGLGVTK pc2  
P04233-2**

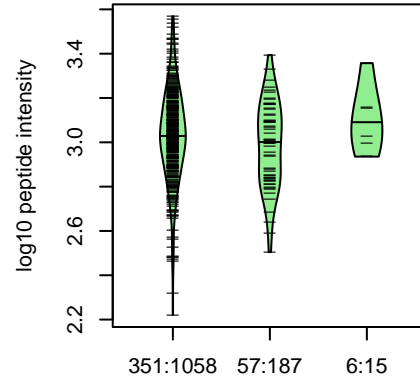

5:149792337:C:T\_T  
p = 0.37, beta = -0.107, N = 414

**LTVTSQNLQLENLR pc2  
7EQJ3;H0YBZ8;P04233;P04233-2;P04**

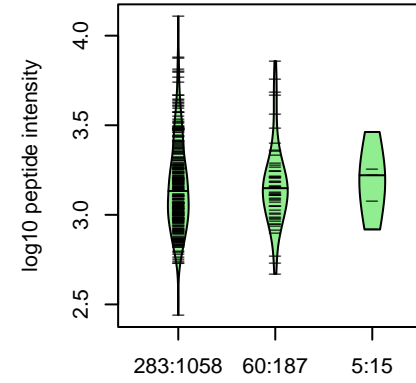

5:149792337:C:T\_T  
p = 0.54, beta = 0.0739, N = 348

**CD74 : NP2  
P04233-2**

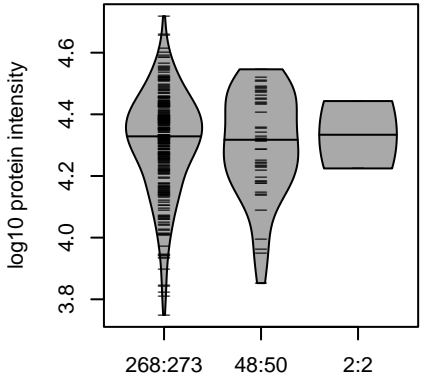

5:149792337:C:T\_T  
p = 0.57, beta = -0.0805, N = 318

**NTMETIDWK pc2  
P04233;P04233-2**

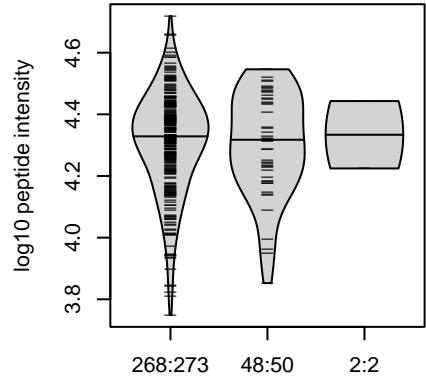

5:149792337:C:T\_T  
p = 0.57, beta = -0.0805, N = 318

**LTVTSQNLQLENLR pc2  
7EQJ3;H0YBZ8;P04233;P04233-2;P04**

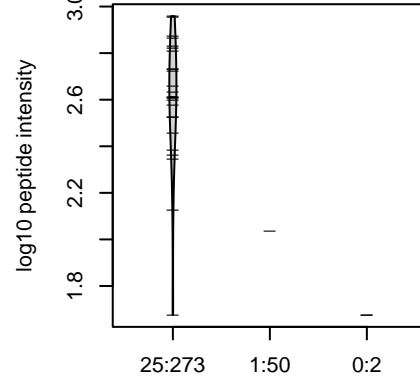

5:149792337:C:T\_T  
p = 0.11, beta = -1.5, N = 26

Assay Target: CD74  
Olink UniProt: P04233  
UKB rsID: rs55796634  
Proxy rsID: rs55796634  
UKB SNP: 5:149792337:C:T  
Proxy SNP: 5:149792337:C:T  
UKB log10(p): 20.1  
UKB BETA: -0.087  
-:-:-  
1236:414:348

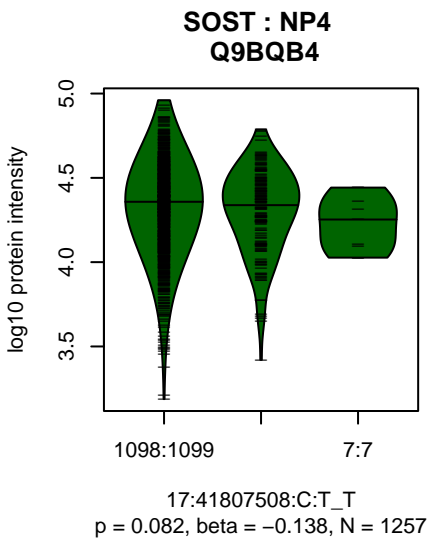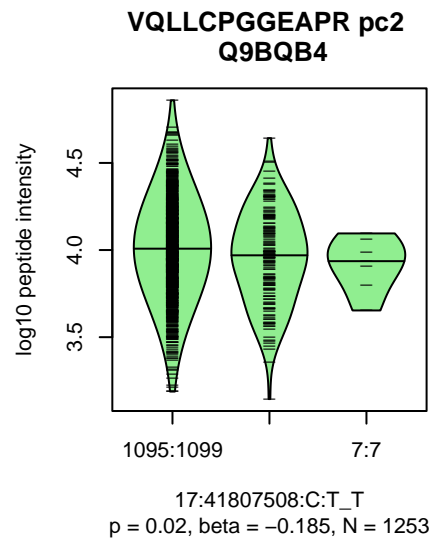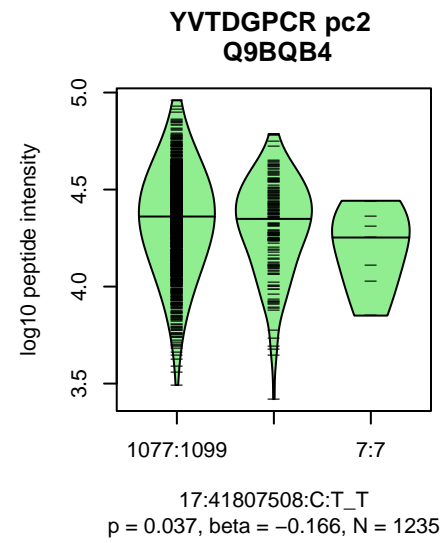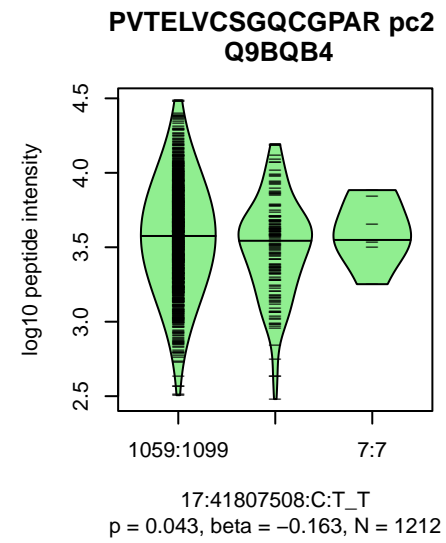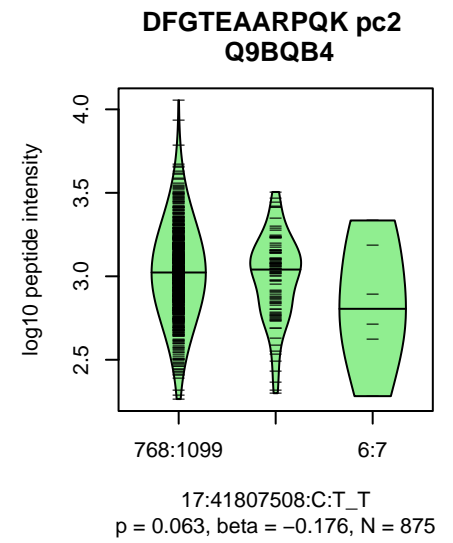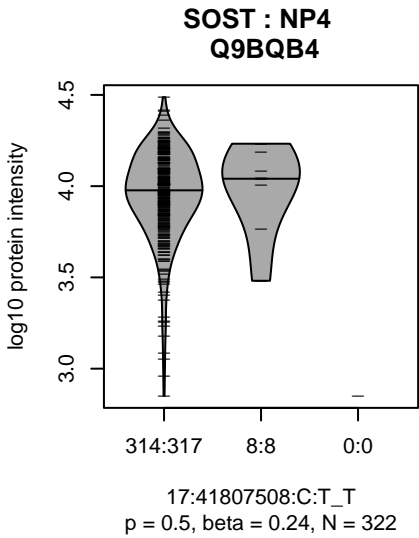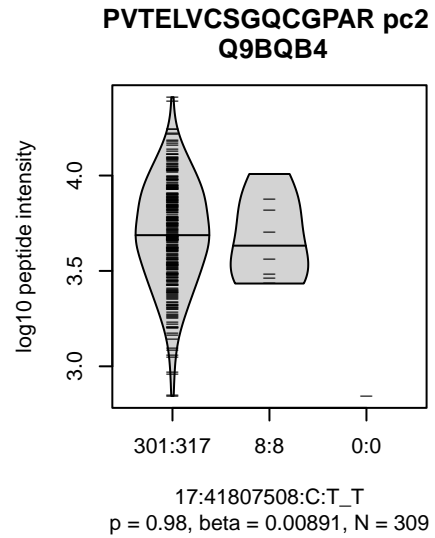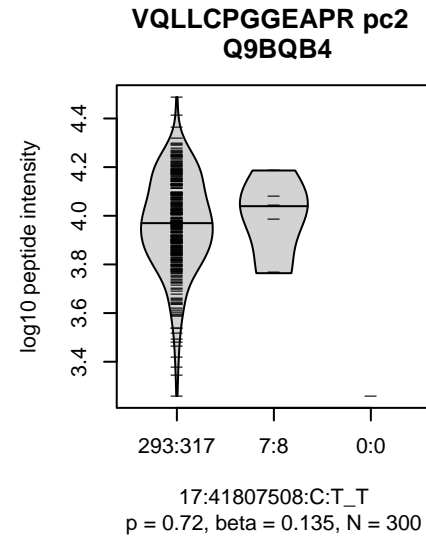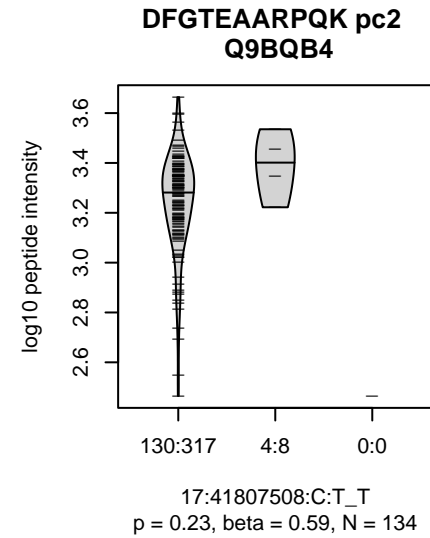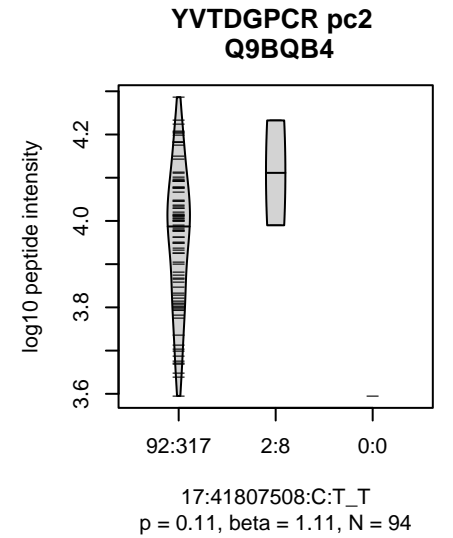

Assay Target: SOST  
 Olink UniProt: Q9BQB4  
 UKB rsID: rs76410205  
 Proxy rsID: rs76410205  
 UKB SNP: 17:41807508:C:T  
 Proxy SNP: 17:41807508:C:T  
 UKB log<sub>10</sub>(p): 19.7  
 UKB BETA: -0.097  
 -----  
 1253:1235:1212:875:871:272:38



**SIL1 : NP2**  
**D6REA1;Q9H173**

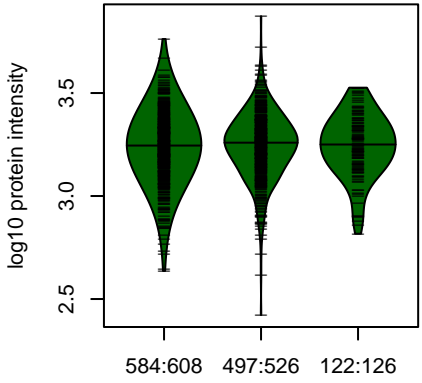

5:138364394:T:C\_C  
 $p = 0.24$ ,  $\beta = 0.0513$ ,  $N = 1203$

**VVTLLYDLVTEK pc2**  
**D6REA1;Q9H173**

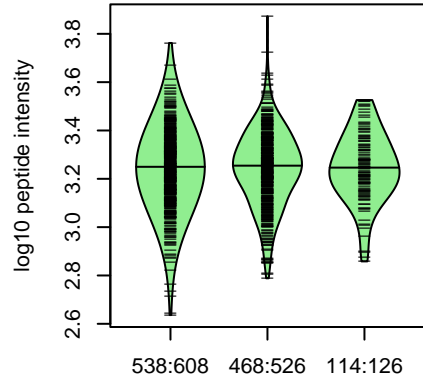

5:138364394:T:C\_C  
 $p = 0.29$ ,  $\beta = 0.0474$ ,  $N = 1120$

**VQVEAIEGGALQK pc2**  
**D6REA1;Q9H173**

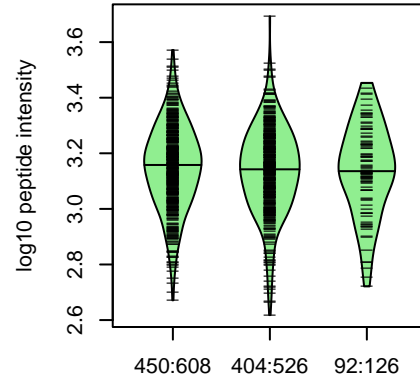

5:138364394:T:C\_C  
 $p = 0.54$ ,  $\beta = -0.03$ ,  $N = 946$

**LLVILATEQPLTAK pc2**  
**D6REA1;Q9H173**

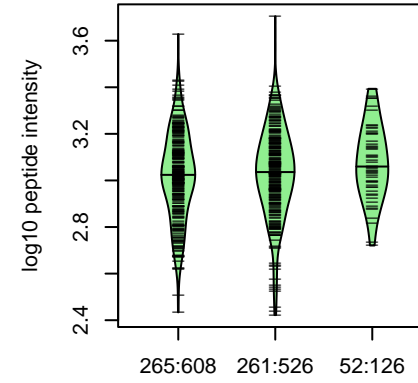

5:138364394:T:C\_C  
 $p = 0.06$ ,  $\beta = 0.121$ ,  $N = 578$

**VQVEAIEGGALQK pc2**  
**D6REA1;Q9H173**

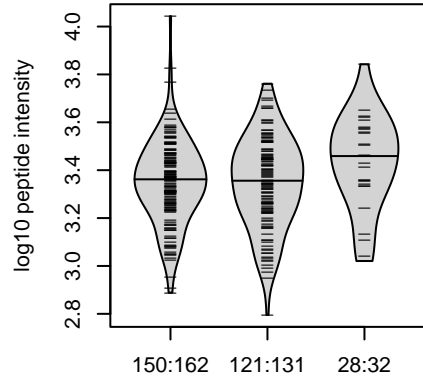

5:138364394:T:C\_C  
 $p = 0.053$ ,  $\beta = 0.168$ ,  $N = 299$

**VVTLLYDLVTEK pc2**  
**D6REA1;Q9H173**

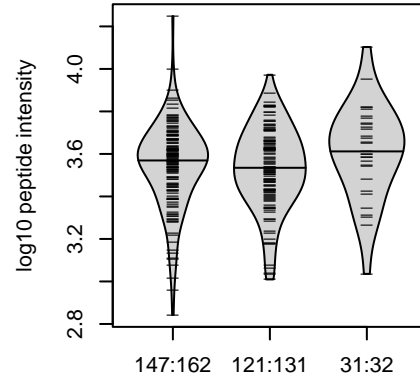

5:138364394:T:C\_C  
 $p = 0.13$ ,  $\beta = 0.128$ ,  $N = 299$

**LLVILATEQPLTAK pc2**  
**D6REA1;Q9H173**

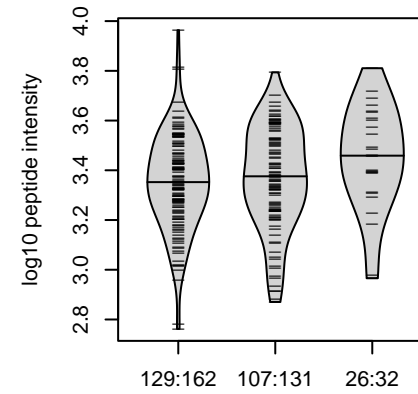

5:138364394:T:C\_C  
 $p = 0.035$ ,  $\beta = 0.193$ ,  $N = 262$

Assay Target: SIL1  
 Olink UniProt: Q9H173  
 UKB rsID: rs11957633  
 Proxy rsID: rs11957633  
 UKB SNP: 5:138364394:T:C  
 Proxy SNP: 5:138364394:T:C  
 UKB  $\log_{10}(p)$ : 18.7  
 UKB BETA: 0.06  
 -:-:-  
 1120:946:578

**RANBP1 : NP3  
P43487-2**

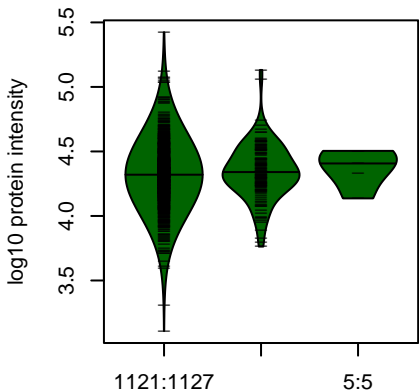

22:20106069:C:A\_A  
p = 0.32, beta = 0.0855, N = 1253

**FASENDLPEWK pc2  
F6WQW2;P43487-2;P43487**

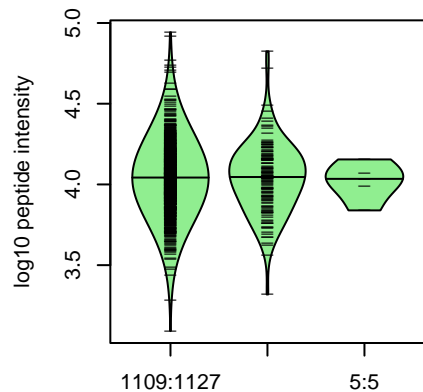

22:20106069:C:A\_A  
p = 0.54, beta = -0.053, N = 1240

**TLLEEDEELFK pc2  
F6WQW2;P43487-2;P43487**

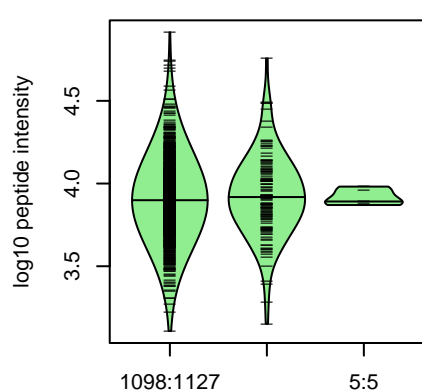

22:20106069:C:A\_A  
p = 0.72, beta = 0.0311, N = 1229

**FLNAENAQK pc2  
F6WQW2;P43487-2;P43487**

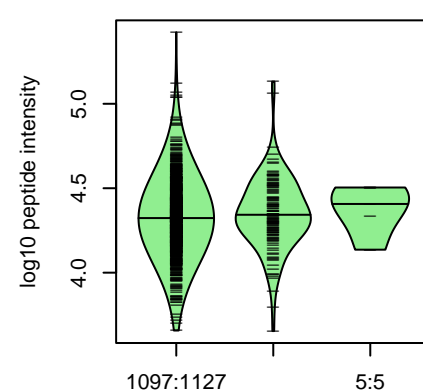

22:20106069:C:A\_A  
p = 0.32, beta = 0.0876, N = 1226

**ICANHITPMSELK pc3  
F6WQW2;P43487-2;P43487**

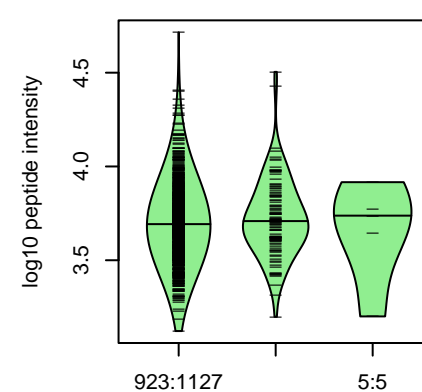

22:20106069:C:A\_A  
p = 0.51, beta = 0.0605, N = 1036

**RANBP1 : NP3  
P43487-2**

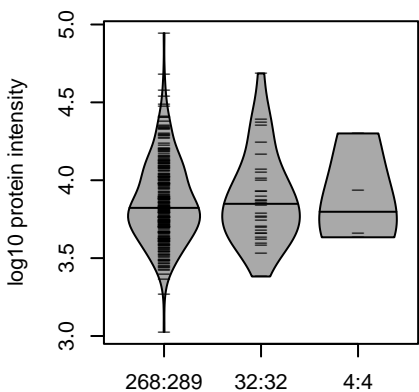

22:20106069:C:A\_A  
p = 0.91, beta = 0.0163, N = 304

**FASENDLPEWK pc2  
F6WQW2;P43487-2;P43487**

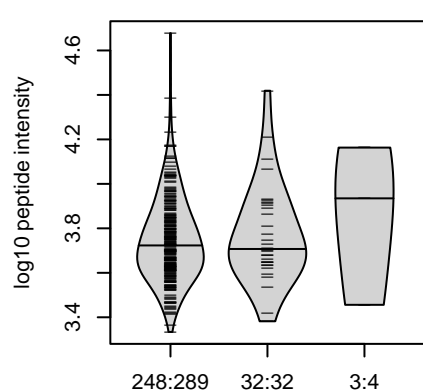

22:20106069:C:A\_A  
p = 0.84, beta = 0.0315, N = 283

**FLNAENAQK pc2  
F6WQW2;P43487-2;P43487**

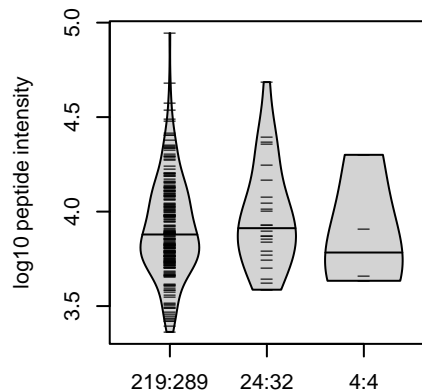

22:20106069:C:A\_A  
p = 0.82, beta = 0.0379, N = 247

**TLLEEDEELFK pc2  
F6WQW2;P43487-2;P43487**

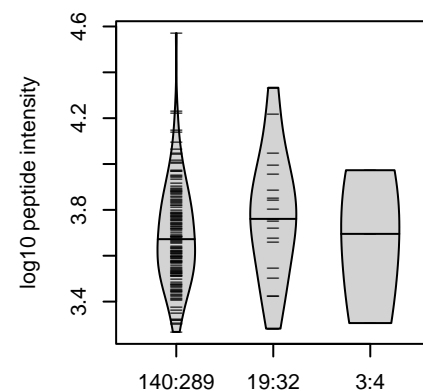

22:20106069:C:A\_A  
p = 0.77, beta = 0.0559, N = 162

**ICANHITPMSELK pc3  
F6WQW2;P43487-2;P43487**

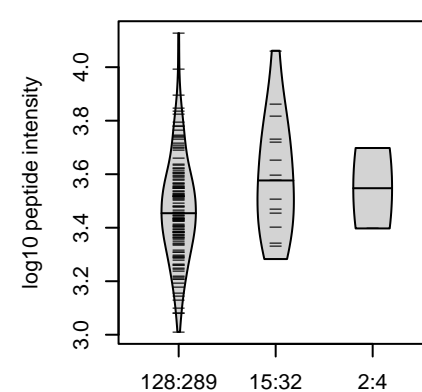

22:20106069:C:A\_A  
p = 0.11, beta = 0.339, N = 145

Assay Target: RANBP1  
Olink UniProt: P43487  
UKB rsID: rs117718692  
Proxy rsID: rs4589855  
UKB SNP: 22:20117344:G:T  
Proxy SNP: 22:20106069:C:A  
UKB log10(p): 18.4  
UKB BETA: 0.122  
-:-:-:-:-NA  
1240:1229:1226:1036:950:827:

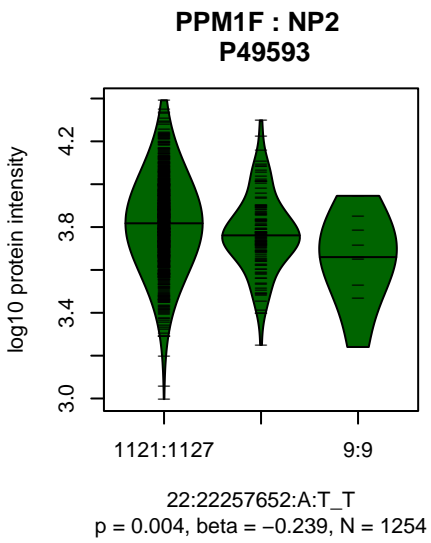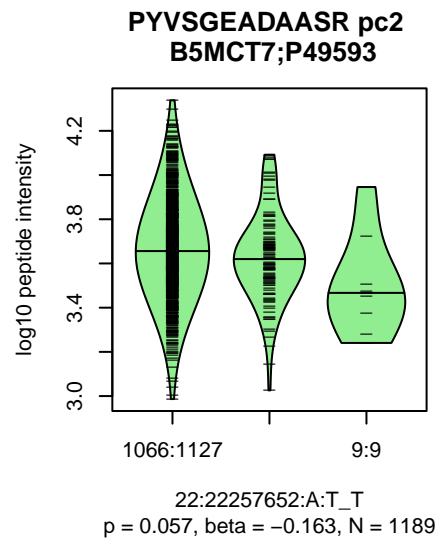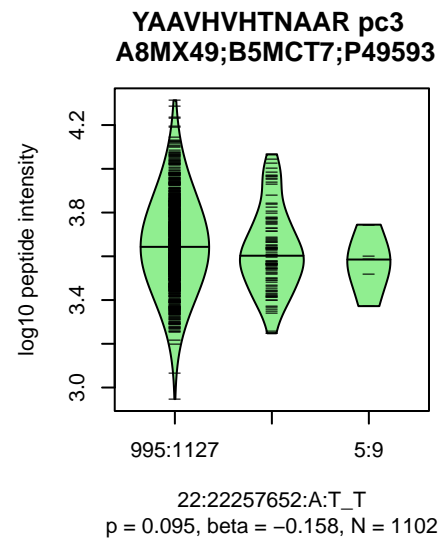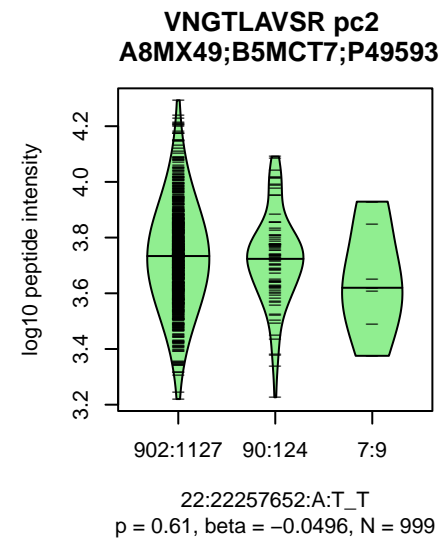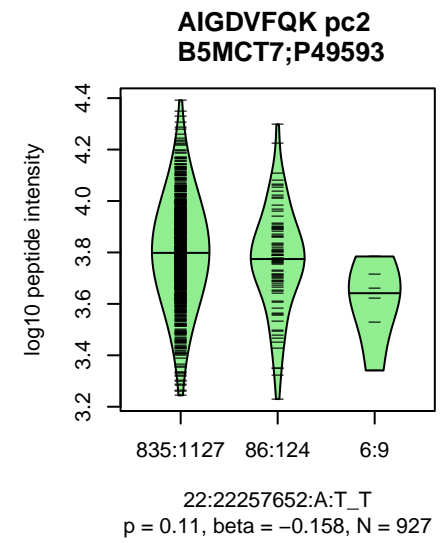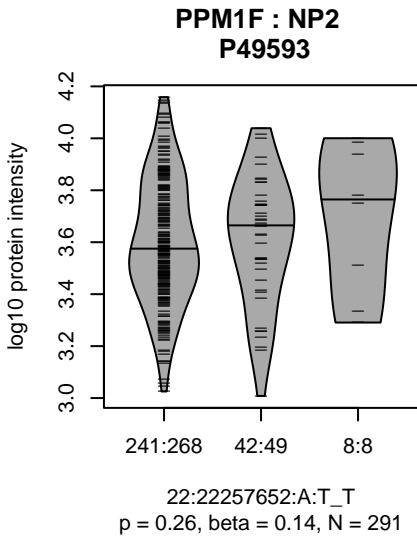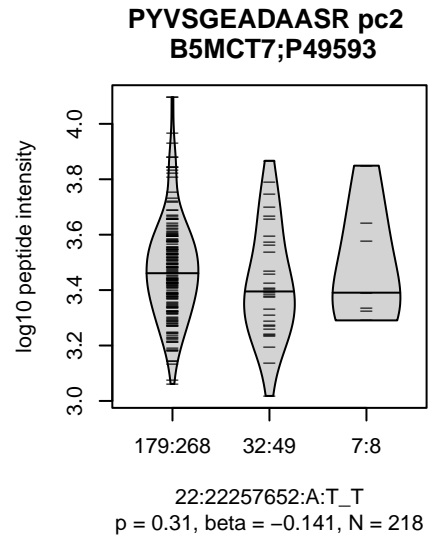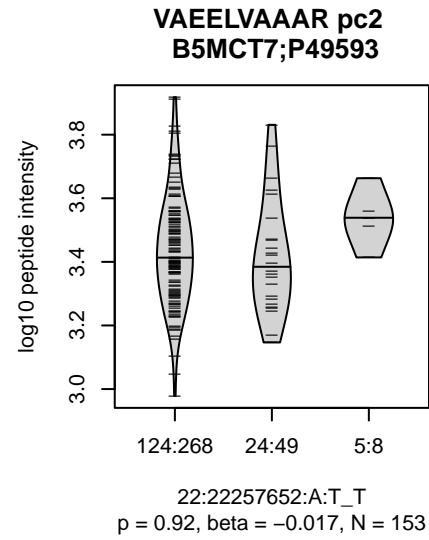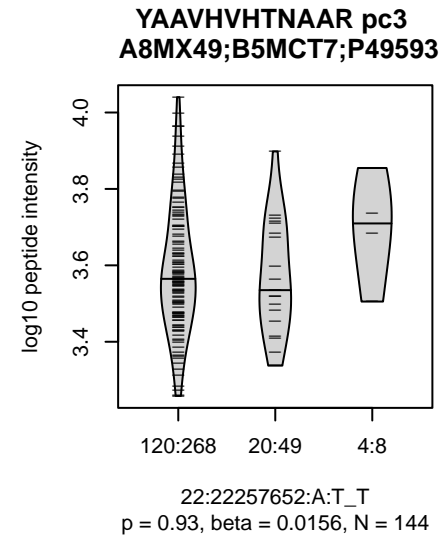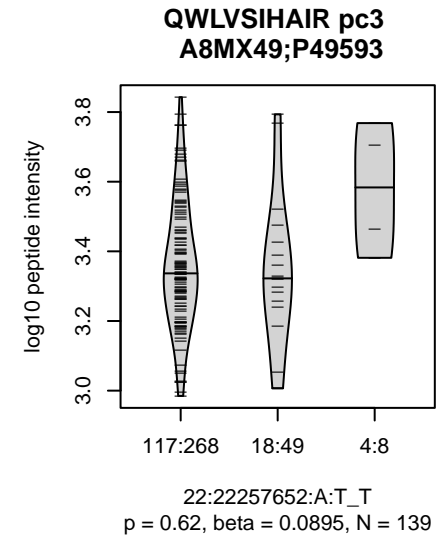

Assay Target: PPM1F  
 Olink UniProt: P49593  
 UKB rsID: rs5750281  
 Proxy rsID: rs5755996  
 UKB SNP: 22:22327787:C:T  
 Proxy SNP: 22:22257652:A:T  
 UKB log10(p): 18.3  
 UKB BETA: -0.132  
 -----  
 1189:1102:999:927:860:842:719

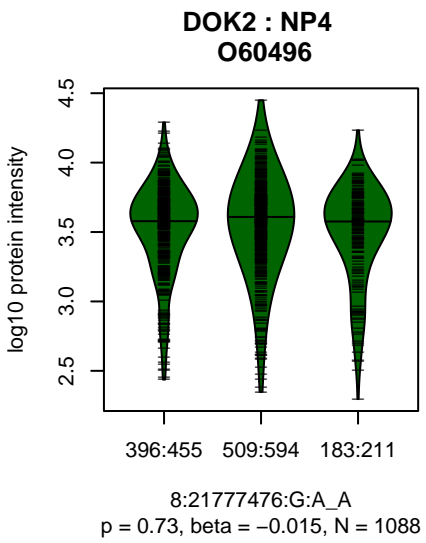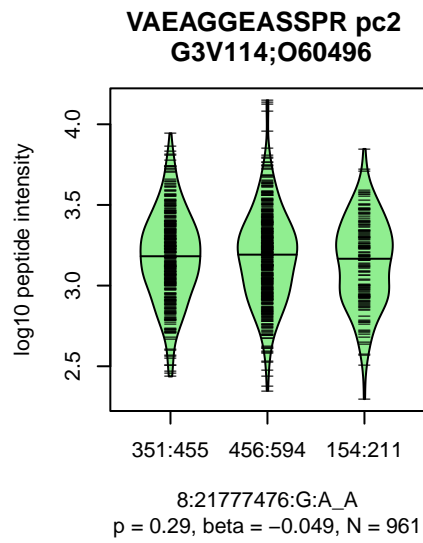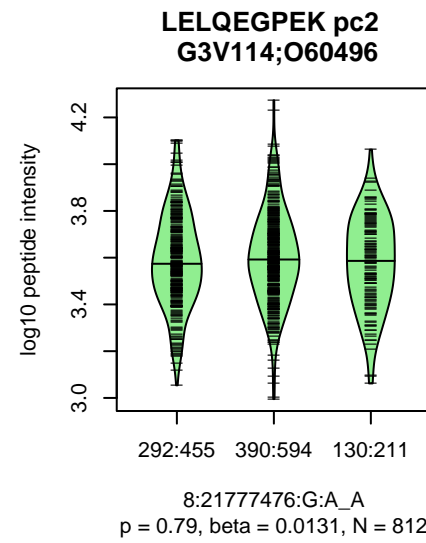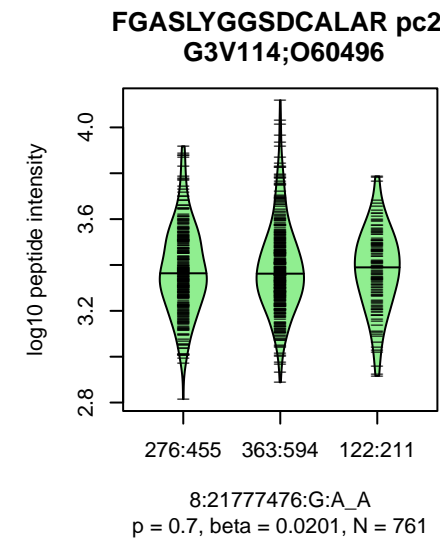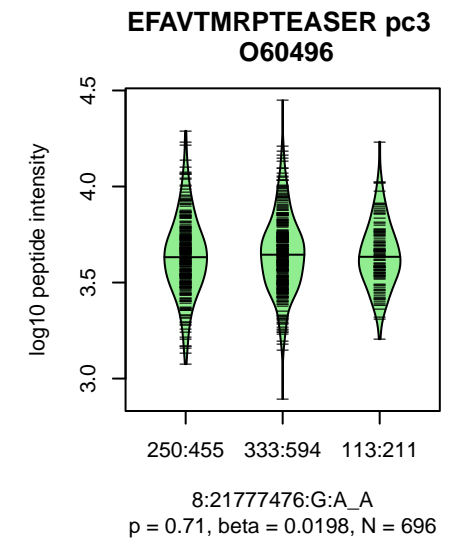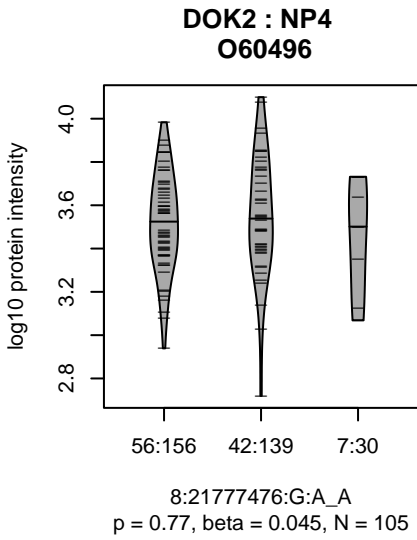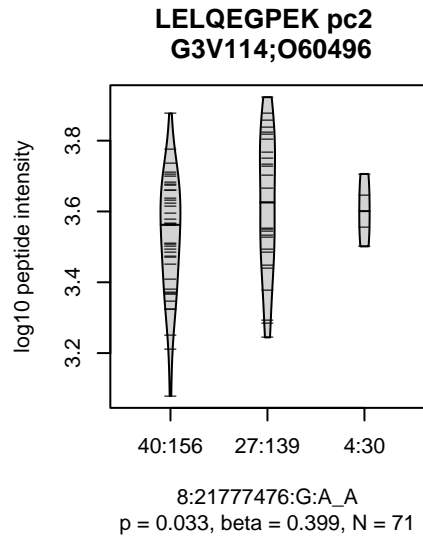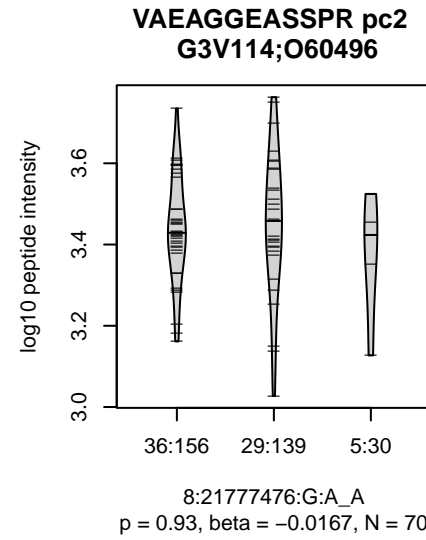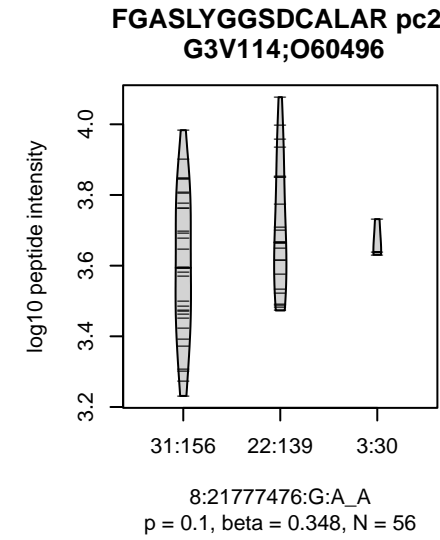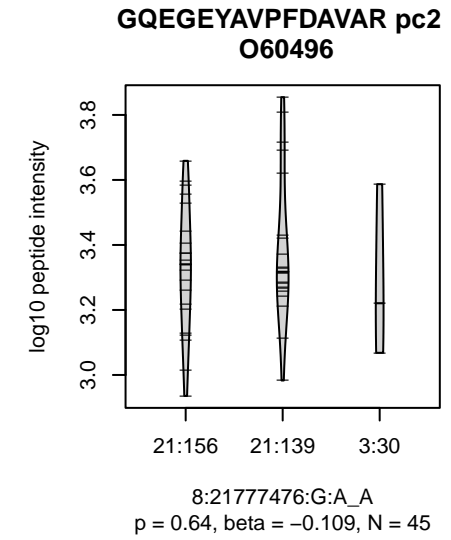

Assay Target: DOK2  
 Olink UniProt: O60496  
 UKB rsID: rs4357289  
 Proxy rsID: rs4357289  
 UKB SNP: 8:21777476:G:A  
 Proxy SNP: 8:21777476:G:A  
 UKB log10(p): 17.8  
 UKB BETA: 0.054  
 -----NA  
 961:812:761:696:531:498:369:3



**GCLM : NP5  
P48507**

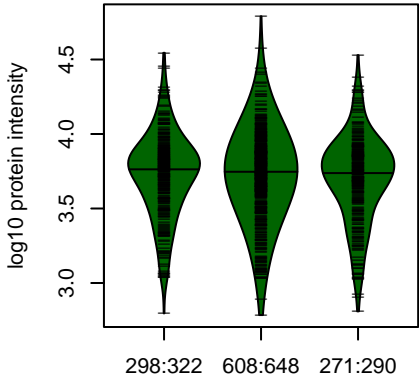

1:94384624:G:A\_A  
 $p = 0.3$ ,  $\beta = -0.043$ ,  $N = 1177$

**TLNEWSSQINPDLVR pc2  
P48507**

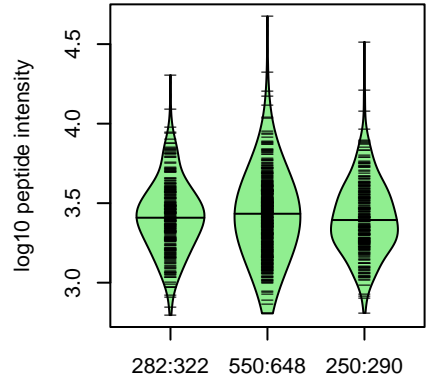

1:94384624:G:A\_A  
 $p = 0.85$ ,  $\beta = -0.0082$ ,  $N = 1082$

**IVAIGTSDLDK pc2  
P48507;P48507-2**

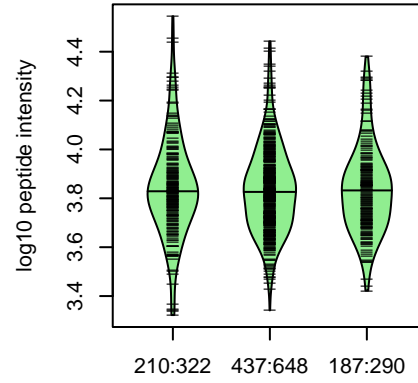

1:94384624:G:A\_A  
 $p = 0.74$ ,  $\beta = -0.0163$ ,  $N = 834$

**TLHLQTGNLLNWGR pc3  
P48507;P48507-2**

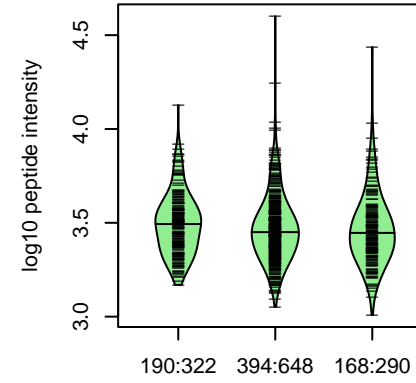

1:94384624:G:A\_A  
 $p = 0.036$ ,  $\beta = -0.11$ ,  $N = 752$

**EFPDVLECTVSHAVEK pc3  
P48507**

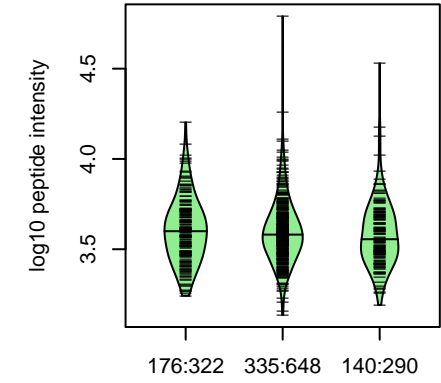

1:94384624:G:A\_A  
 $p = 0.28$ ,  $\beta = -0.0603$ ,  $N = 651$

**GCLM : NP5  
P48507**

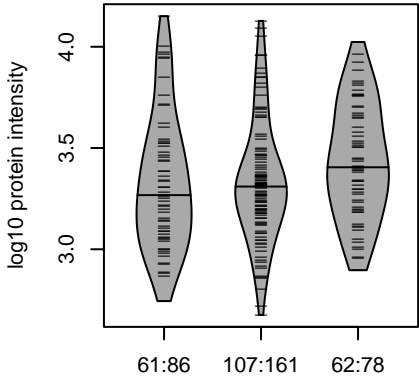

1:94384624:G:A\_G  
 $p = 0.015$ ,  $\beta = 0.215$ ,  $N = 230$

**TLNEWSSQINPDLVR pc2  
P48507**

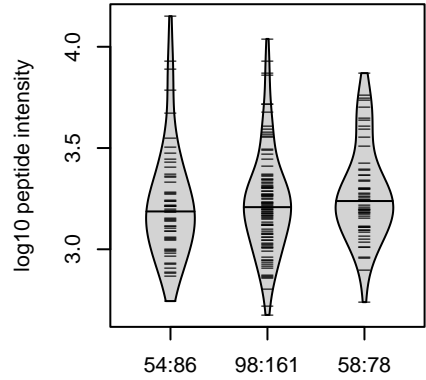

1:94384624:G:A\_G  
 $p = 0.067$ ,  $\beta = 0.17$ ,  $N = 210$

**TLHLQTGNLLNWGR pc3  
P48507;P48507-2**

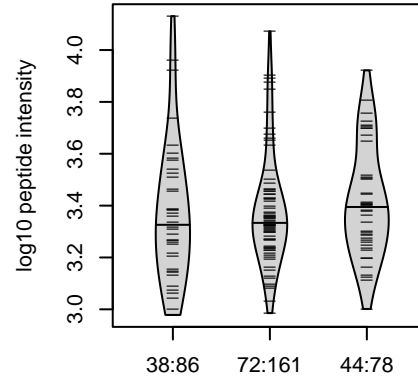

1:94384624:G:A\_G  
 $p = 0.2$ ,  $\beta = 0.137$ ,  $N = 154$

**LFIVESNSSSTR pc2  
P48507;P48507-2**

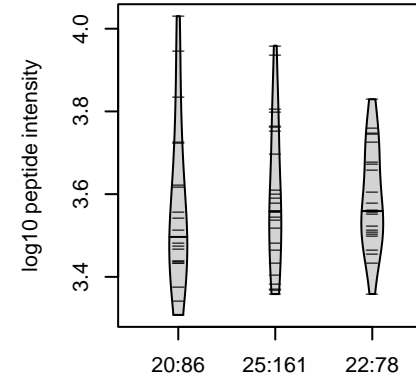

1:94384624:G:A\_G  
 $p = 0.47$ ,  $\beta = 0.107$ ,  $N = 67$

**TQLEQLYQWAQVK pc2  
P48507;P48507-2**

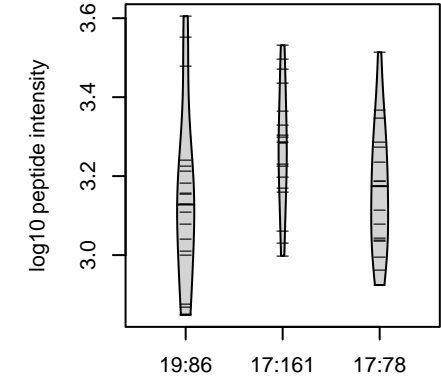

1:94384624:G:A\_G  
 $p = 0.51$ ,  $\beta = 0.106$ ,  $N = 53$

Assay Target: GCLM  
Olink UniProt: P48507  
UKB rsID: rs774698707  
Proxy rsID: rs12563495  
UKB SNP: 1:94383448:TTAA:T  
Proxy SNP: 1:94384624:G:A  
UKB log10(p): 17.6  
UKB BETA: -0.055  
-----NA:NA  
1082:834:752:651:444:227:219:

**ST13 : NP1  
P50502**

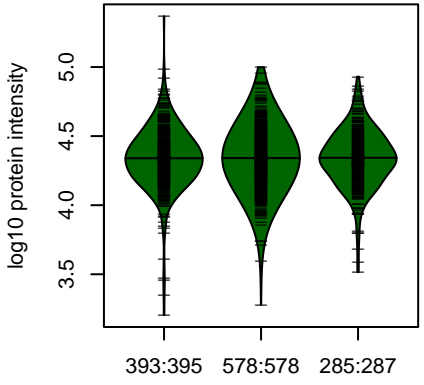

22:41302973:A:T\_A  
p = 0.59, beta = 0.0205, N = 1256

**AIDLFTDAIK pc2  
P50502**

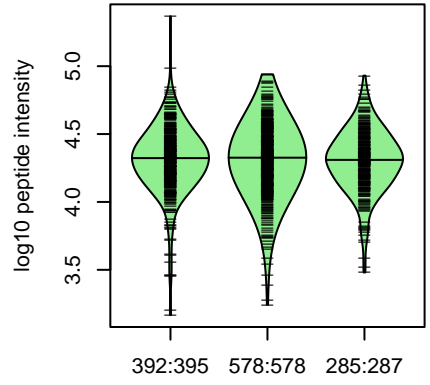

22:41302973:A:T\_A  
p = 0.86, beta = 0.00674, N = 1255

**AIEINPDSAQPYK pc2  
P50502**

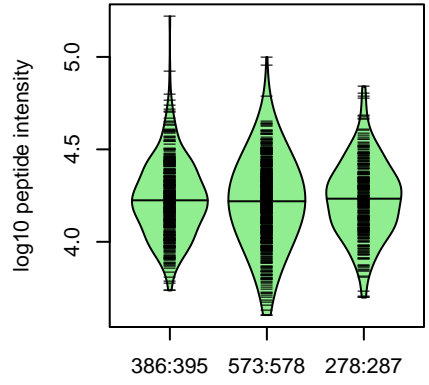

22:41302973:A:T\_A  
p = 0.62, beta = 0.0192, N = 1237

**LDYDEASAMLK pc2  
P50502**

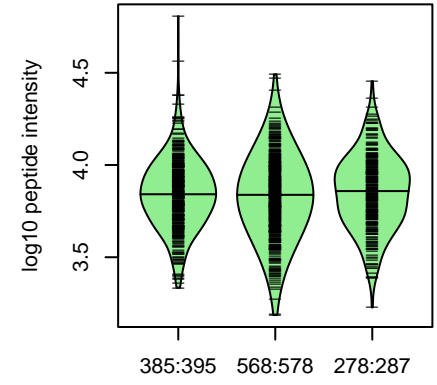

22:41302973:A:T\_A  
p = 0.22, beta = 0.0474, N = 1231

**QDPSVLHTEEMR pc3  
F8WAQ7;P50502**

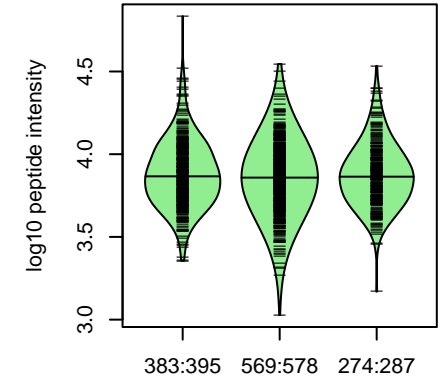

22:41302973:A:T\_A  
p = 0.82, beta = 0.00871, N = 1226

**ST13 : NP1  
P50502**

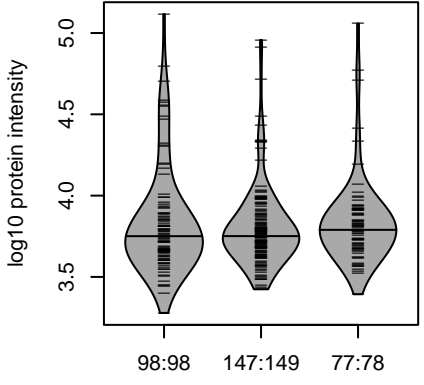

22:41302973:A:T\_A  
p = 0.89, beta = 0.0103, N = 322

**AIDLFTDAIK pc2  
P50502**

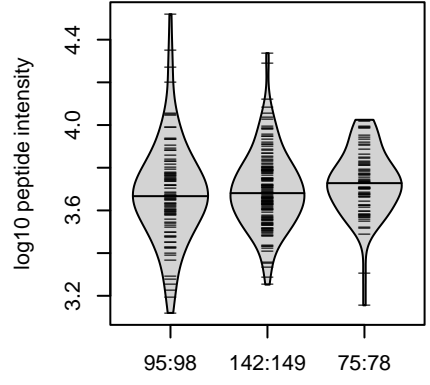

22:41302973:A:T\_A  
p = 0.28, beta = 0.0826, N = 312

**AIEINPDSAQPYK pc2  
P50502**

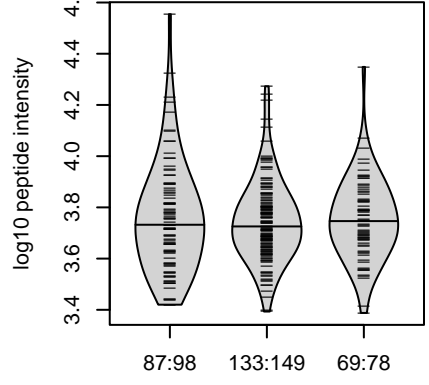

22:41302973:A:T\_A  
p = 0.31, beta = -0.0808, N = 289

**VAAIEALNDGELQK pc2  
P50502**

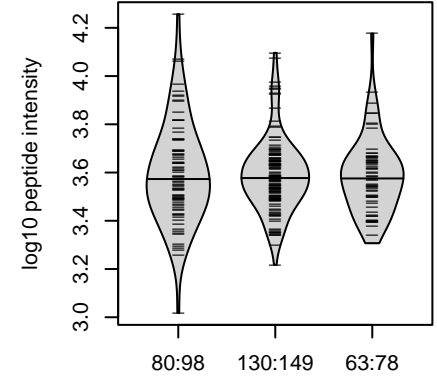

22:41302973:A:T\_A  
p = 0.26, beta = -0.0926, N = 273

**QDPSVLHTEEMR pc3  
F8WAQ7;P50502**

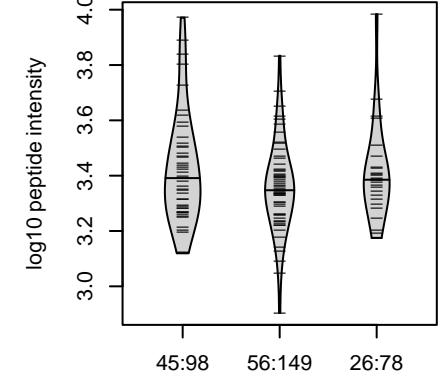

22:41302973:A:T\_A  
p = 0.26, beta = -0.134, N = 127

Assay Target: ST13  
Olink UniProt: P50502  
UKB rsID: rs5995963  
Proxy rsID: rs5995963  
UKB SNP: 22:41302973:A:T  
Proxy SNP: 22:41302973:A:T  
UKB log10(p): 17.1  
UKB BETA: -0.052  
-----NA  
1255:1237:1231:1226:1202:972

**SHH : NP4  
Q15465**

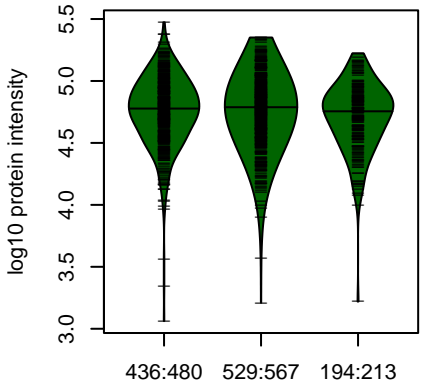

7:156173238:T:C\_C  
p = 0.13, beta = -0.0618, N = 1159

**QFIPNVAEK pc2  
Q15465**

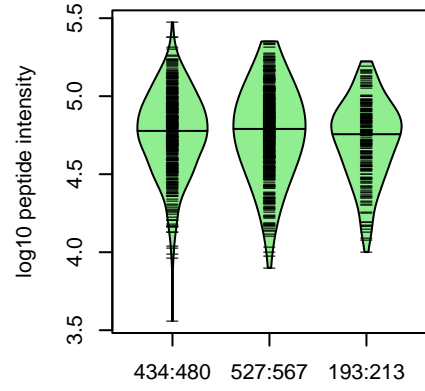

7:156173238:T:C\_C  
p = 0.15, beta = -0.0593, N = 1154

**ELTPNYNPDIIFK pc2  
Q14623;Q15465**

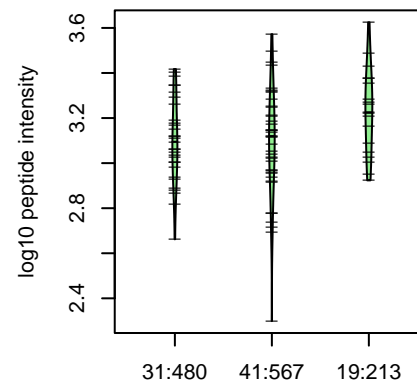

7:156173238:T:C\_C  
p = 0.072, beta = 0.249, N = 91

Assay Target: SHH  
Olink UniProt: Q15465  
UKB rsID: rs10225292  
Proxy rsID: rs10225292  
UKB SNP: 7:156173238:T:C  
Proxy SNP: 7:156173238:T:C  
UKB log10(p): 16.6  
UKB BETA: -0.055  
-:-  
1154:91



**DNAJB1 : NP1  
P25685**

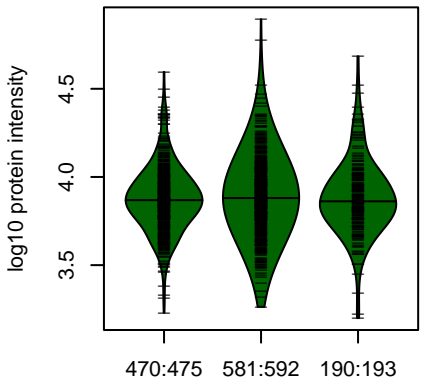

19:14655502:G:A\_G  
p = 0.97, beta = -0.00135, N = 1241

**VSLEEIYSGGTK pc2  
A0A7I2V3K7;M0QXK0;P25685-2;Q9UDY4 A0A7I2V3K7;M0QXK0;P25685-2;P25 A0A7I2V3K7;M0QXK0;P25685-2;P25**

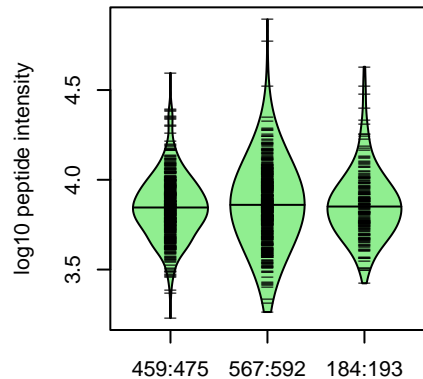

19:14655502:G:A\_G  
p = 0.75, beta = 0.013, N = 1210

**KQDPPVTHDLR pc3**

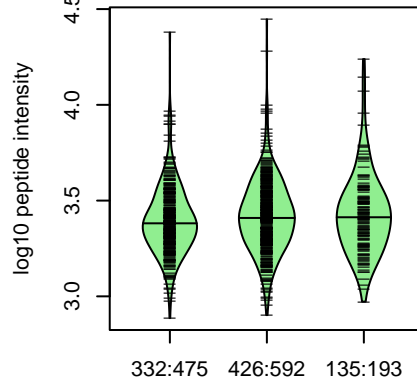

19:14655502:G:A\_G  
p = 0.16, beta = 0.0684, N = 893

**ILTIEVK pc2**

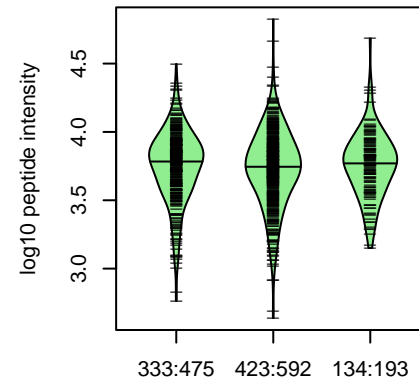

19:14655502:G:A\_G  
p = 0.98, beta = -0.00118, N = 890

**DYYQTLGLAR pc2  
M0QXK0;P25685**

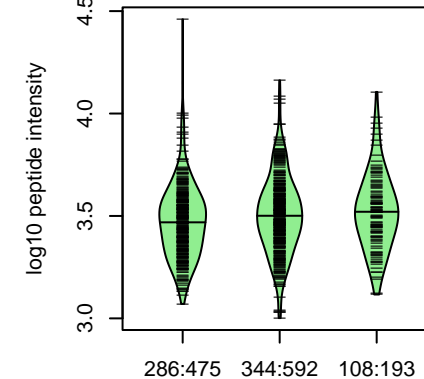

19:14655502:G:A\_G  
p = 0.02, beta = 0.123, N = 738

**DNAJB1 : NP1  
P25685**

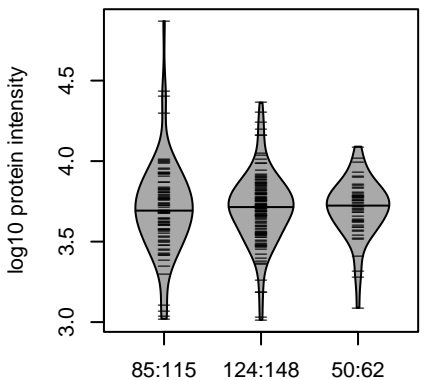

19:14655502:G:A\_G  
p = 0.55, beta = 0.0522, N = 259

**VSLEEIYSGGTK pc2  
A0A7I2V3K7;M0QXK0;P25685-2;Q9UDY4 A0A7I2V3K7;M0QXK0;P25685-2;P25 A0A7I2V3K7;M0QXK0;P25685-2;P25 A0A7I2V3K7;M0QXK0;P25685-2;P25**

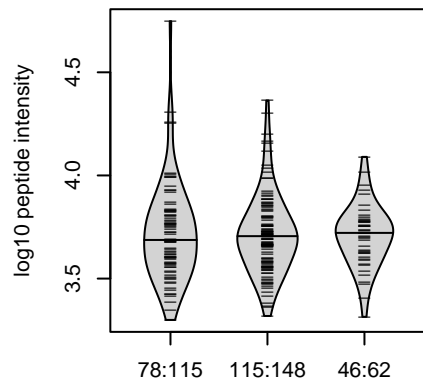

19:14655502:G:A\_G  
p = 0.67, beta = 0.038, N = 239

**KQDPPVTHDLR pc3**

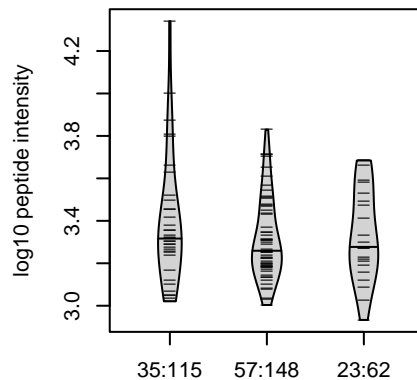

19:14655502:G:A\_G  
p = 0.74, beta = -0.0438, N = 115

**KVPGEGLPLPK pc2**

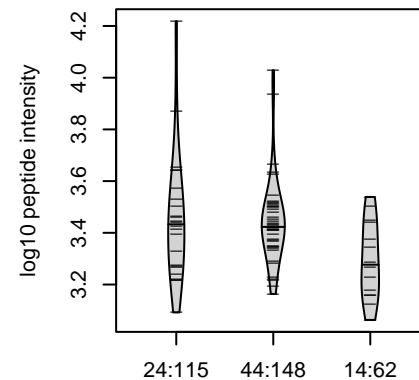

19:14655502:G:A\_G  
p = 0.0076, beta = -0.417, N = 82

**DGSDVIYPAR pc2**

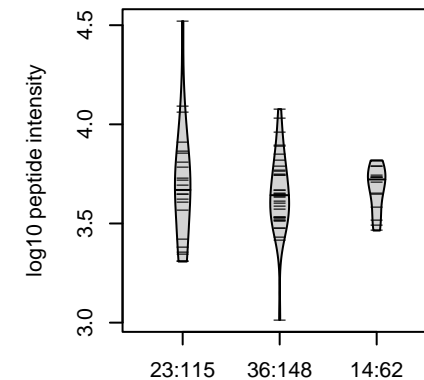

19:14655502:G:A\_G  
p = 0.66, beta = 0.0711, N = 73

Assay Target: DNAJB1  
Olink UniProt: P25685  
UKB rsID: rs7248009  
Proxy rsID: rs7248009  
UKB SNP: 19:14655502:G:A  
Proxy SNP: 19:14655502:G:A  
UKB log10(p): 15.7  
UKB BETA: -0.051  
-----NA:N  
1210:893:890:738:385:348:304:

**SLIT2 : NP4**  
O94813;X6R3P0

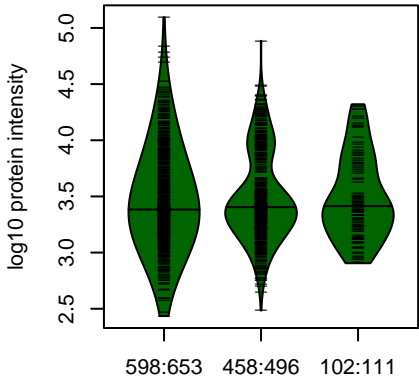

4:20190972:C:T\_C  
 $p = 0.7$ ,  $\beta = 0.0175$ ,  $N = 1158$

**VPMQTGILPGCEPCHK pc3**  
I87WYV5;O94813;O94813-2;O94813-I87WYV5;O94813;O94813-2;O94813-I87WYV5;O94813;O94813-2;O94813-

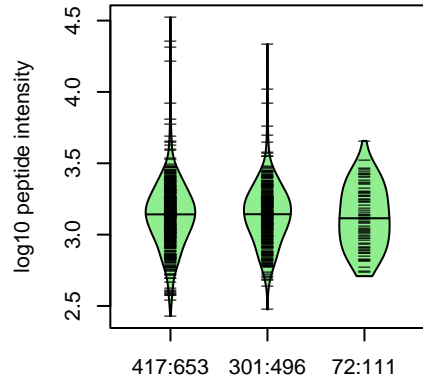

4:20190972:C:T\_C  
 $p = 0.64$ ,  $\beta = -0.0256$ ,  $N = 790$

**ESYLQIPSAK pc2**

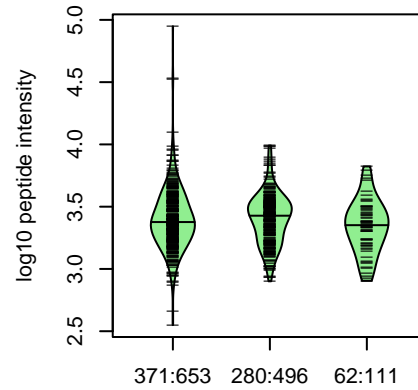

4:20190972:C:T\_C  
 $p = 0.15$ ,  $\beta = -0.0819$ ,  $N = 713$

**NLYINSELQDFQK pc2**

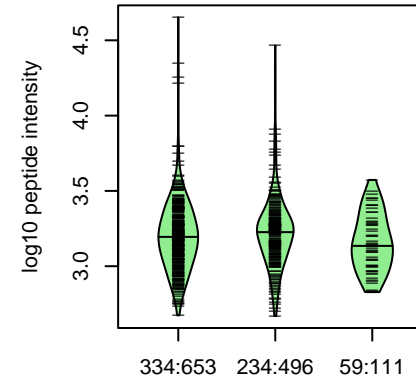

4:20190972:C:T\_C  
 $p = 0.47$ ,  $\beta = -0.043$ ,  $N = 627$

**TNDPCLGNK pc2**

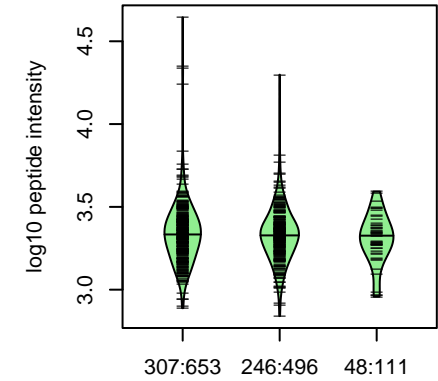

4:20190972:C:T\_C  
 $p = 0.15$ ,  $\beta = -0.0914$ ,  $N = 601$

**SLIT2 : NP4**  
I87WYV5;O94813;O94813-2;O94813-

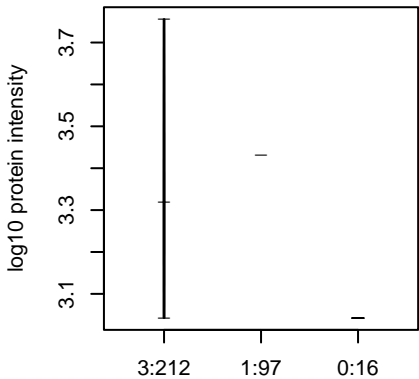

4:20190972:C:T\_C  
 $p = \text{NA}$ ,  $\beta = \text{NA}$ ,  $N = 4$

Assay Target: SLIT2  
Olink UniProt: O94813  
UKB rsID: rs587668  
Proxy rsID: rs587668  
UKB SNP: 4:20190972:C:T  
Proxy SNP: 4:20190972:C:T  
UKB log10(p): 15.6  
UKB BETA: -0.056  
-----\*

790:713:627:601:381:330:292:2
