# Supplementary material for: A genome-wide association study of mass spectrometry proteomics using the Seer Proteograph platform
Source: PubMed Central journal article supplement (PMC11160678; doi:10.1101/2024.05.27.596028), 2024-06-01
Supplement: NIHPP2024.05.27.596028v1-supplement-5.pdf [file NIHPP2024.05.27.596028v1-supplement-5.pdf]

## SUPPLEMENTARY MATERIAL

### Supplementary Tables [provided as a multi-sheet MS Excel file]

|    | A                           | B                                                                                                          |
|----|-----------------------------|------------------------------------------------------------------------------------------------------------|
| 1  | <b>Supplementary Tables</b> |                                                                                                            |
| 2  |                             |                                                                                                            |
| 3  | <b>Table</b>                | <b>Content</b>                                                                                             |
| 4  | ST1                         | Annotated list of 1,980 proteins assayed in this GWAS                                                      |
| 5  | ST2                         | Annotated list of 252 pQTLs identified in this study                                                       |
| 6  | ST3                         | Summary statistics for association of the 1,980 with age, sex, and ten genotype principle components (PCs) |
| 7  | ST4                         | 6498 proteins with age & sex associations in at least one of deCODE, UKBPPP, and Tarkin                    |
| 8  | ST5                         | 1,881 pQTLs from deCODE, annotated with association data with proteins and peptides in Tarkin and QMDiab   |
| 9  | ST6                         | 1,917 pQTLs from UKB-PPP, annotated with association data with proteins and peptides in Tarkin and QMDiab  |
| 10 | ST7                         | 322 pQTLs from deCODE, scored with MSPA                                                                    |
| 11 | ST8                         | 374 pQTLs from UKB-PPP, scored with MSPA                                                                   |
| 12 | ST9                         | 46 cis-pQTLs reported both by deCODE and UKBPPP, evaluated on same SNPs in Tarkin and QMDiab               |
| 13 | ST10                        | 66 cis-pQTLs with potential epitope-effect generating variants                                             |

### Supplementary Figures

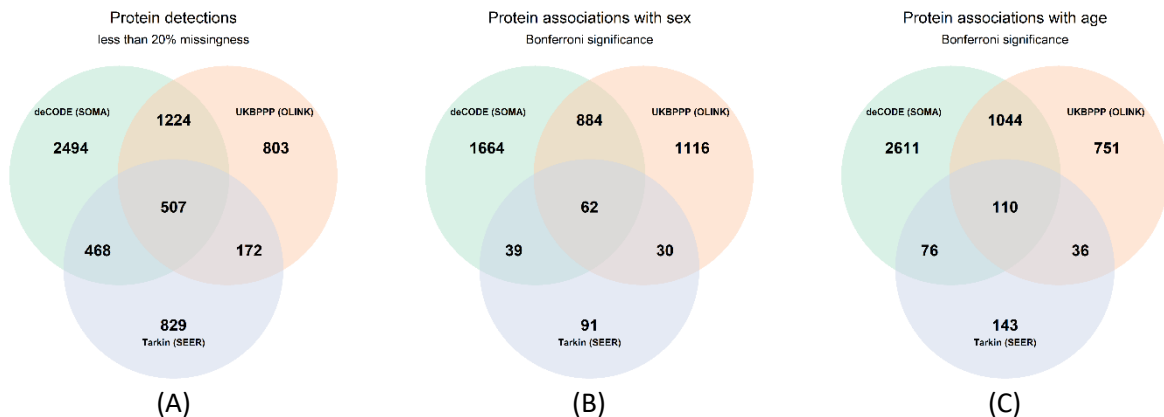

**Figure S1: Venn diagrams.** Proteins reported by the three studies, 1,980 proteins with <20% missingness for Tarkin, out of 5,753 proteins quantified across the discovery cohort (A); Proteins associated with sex (B) and age (C) at a significance level of 0.05 / number of proteins reported.

The following Figures are provided as separate PDF files:

**Figure S2: Violin plots of protein and peptide levels by genotype for 252 pQTLs identified in this study.** See Figure 3 for legend. File: [Figure\\_S2\\_PGwas\\_replicate\\_check.20240523.pdf](#)

**Figure S3: Violin plots of protein and peptide levels by genotype for 322 pQTLs identified by the deCODE OLINK study.** See Figure 7 for legend. File: [Figure\\_S3\\_PGwas\\_test\\_epitope\\_SOMA.20240523.pdf](#)

**Figure S4: Violin plots of protein and peptide levels by genotype for 374 pQTLs identified by the UKB-PPP SOMAScan study.** See Figure 7 for legend. File: [Figure\\_S4\\_PGwas\\_test\\_epitope\\_OLINK.20240523.pdf](#)
